# Supplementary material
Source: PubMed Central journal article supplement (PMC5108054)
Supplement: NIHMS436991-supplement-S1A.pdf [file NIHMS436991-supplement-S1A.pdf]

P0A955 ALKH\_ECOLI KHG/KDPG aldolase  
P77425 ALLC\_ECOLI Allantoate amidohydrolase  
P0ACN4 ALLR\_ECOLI HTH-type transcriptional repressor AllR  
P36548 AMIA\_ECOLI Probable N-acetylmuramoyl-L-alanine amidase AmiA  
P36548 AMIA\_ECOLI Probable N-acetylmuramoyl-L-alanine amidase AmiA  
P63883 AMIC\_ECOLI N-acetylmuramoyl-L-alanine amidase AmiC  
P68767 AMPA\_ECOLI Cytosol aminopeptidase  
P68767 AMPA\_ECOLI Cytosol aminopeptidase  
P0AE18 AMPM\_ECOLI Methionine aminopeptidase  
P04825 AMPN\_ECOLI Aminopeptidase N  
P04825 AMPN\_ECOLI Aminopeptidase N  
P69503 APT\_ECOLI Adenine phosphoribosyltransferase  
P0A9Q1 ARCA\_ECOLI Aerobic respiration control protein ArcA

P0A9Q1 ARCA\_ECOLI Aerobic respiration control protein ArcA  
P0A9Q1 ARCA\_ECOLI Aerobic respiration control protein ArcA  
P0A6D7 AROK\_ECOLI Shikimate kinase 1  
P00963 ASNA\_ECOLI Aspartate--ammonia ligase  
P00963 ASNA\_ECOLI Aspartate--ammonia ligase  
P00963 ASNA\_ECOLI Aspartate--ammonia ligase  
P00963 ASNA\_ECOLI Aspartate--ammonia ligase  
P00805 ASPG2\_ECOL L-asparaginase 2  
P0ABB0 ATPA\_ECOLI ATP synthase subunit alpha  
P0ABB4 ATPB\_ECOLI ATP synthase subunit beta  
P0ABA0 ATPF\_ECOLI ATP synthase subunit b  
P0ABA0 ATPF\_ECOLI ATP synthase subunit b  
P0ABD3 BFR\_ECOLI Bacterioferritin  
P0ABD3 BFR\_ECOLI Bacterioferritin  
P0ABD3 BFR\_ECOLI Bacterioferritin  
P0ABD3 BFR\_ECOLI Bacterioferritin  
P21179 CATE\_ECOLI Catalase HP11  
P21179 CATE\_ECOLI Catalase HP11







|        |            |                                                     |
|--------|------------|-----------------------------------------------------|
| P0ABH9 | CLPA_ECOLI | ATP-dependent Clp protease ATP-binding subunit clpA |
| P0ABH9 | CLPA_ECOLI | ATP-dependent Clp protease ATP-binding subunit clpA |
| P0ABH9 | CLPA_ECOLI | ATP-dependent Clp protease ATP-binding subunit clpA |
| P0ABH9 | CLPA_ECOLI | ATP-dependent Clp protease ATP-binding subunit clpA |
| P63284 | CLPB_ECOLI | Chaperone protein clpB                              |
| P63284 | CLPB_ECOLI | Chaperone protein clpB                              |
| P63284 | CLPB_ECOLI | Chaperone protein clpB                              |
| P63284 | CLPB_ECOLI | Chaperone protein clpB                              |
| P63284 | CLPB_ECOLI | Chaperone protein clpB                              |
| P63284 | CLPB_ECOLI | Chaperone protein clpB                              |
| P63284 | CLPB_ECOLI | Chaperone protein clpB                              |
| P63284 | CLPB_ECOLI | Chaperone protein clpB                              |
| P63284 | CLPB_ECOLI | Chaperone protein clpB                              |
| P63284 | CLPB_ECOLI | Chaperone protein clpB                              |
| P63284 | CLPB_ECOLI | Chaperone protein clpB                              |
| P63284 | CLPB_ECOLI | Chaperone protein clpB                              |
| P63284 | CLPB_ECOLI | Chaperone protein clpB                              |
| P63284 | CLPB_ECOLI | Chaperone protein clpB                              |
| P63284 | CLPB_ECOLI | Chaperone protein clpB                              |
| P63284 | CLPB_ECOLI | Chaperone protein clpB                              |
| P63284 | CLPB_ECOLI | Chaperone protein clpB                              |
| P63284 | CLPB_ECOLI | Chaperone protein clpB                              |
| P63284 | CLPB_ECOLI | Chaperone protein clpB                              |
| P63284 | CLPB_ECOLI | Chaperone protein clpB                              |
| P63284 | CLPB_ECOLI | Chaperone protein clpB                              |
| P63284 | CLPB_ECOLI | Chaperone protein clpB                              |
| P63284 | CLPB_ECOLI | Chaperone protein clpB                              |
| P63284 | CLPB_ECOLI | Chaperone protein clpB                              |
| P63284 | CLPB_ECOLI | Chaperone protein clpB                              |
| P63284 | CLPB_ECOLI | Chaperone protein clpB                              |
| P63284 | CLPB_ECOLI | Chaperone protein clpB                              |
| P63284 | CLPB_ECOLI | Chaperone protein clpB                              |
| P63284 | CLPB_ECOLI | Chaperone protein clpB                              |
| P63284 | CLPB_ECOLI | Chaperone protein clpB                              |
| P63284 | CLPB_ECOLI | Chaperone protein clpB                              |
| P63284 | CLPB_ECOLI | Chaperone protein clpB                              |
| P63284 | CLPB_ECOLI | Chaperone protein clpB                              |
| P63284 | CLPB_ECOLI | Chaperone protein clpB                              |
| P63284 | CLPB_ECOLI | Chaperone protein clpB                              |
| P63284 | CLPB_ECOLI | Chaperone protein clpB                              |
| P0ACJ8 | CRP_ECOLI  | Catabolite gene activator                           |
| P0ACJ8 | CRP_ECOLI  | Catabolite gene activator                           |
| P0ACJ8 | CRP_ECOLI  | Catabolite gene activator                           |
| P0ACJ8 | CRP_ECOLI  | Catabolite gene activator                           |
| P0ABJ9 | CYDA_ECOLI | Cytochrome d ubiquinol oxidase subunit 1            |
| P0ABJ9 | CYDA_ECOLI | Cytochrome d ubiquinol oxidase subunit 1            |
| P0ABJ9 | CYDA_ECOLI | Cytochrome d ubiquinol oxidase subunit 1            |
| P0ABJ9 | CYDA_ECOLI | Cytochrome d ubiquinol oxidase subunit 1            |
| P0ABJ9 | CYDA_ECOLI | Cytochrome d ubiquinol oxidase subunit 1            |
| P00816 | CYNS_ECOLI | Cyanate hydratase                                   |

P00816 CYNS\_ECOLI Cyanate hydratase  
P0A9F3 CYSB\_ECOLI HTH-type transcriptional regulator cysB  
P0ABK5 CYSK\_ECOLI Cysteine synthase A  
P16700 CYSP\_ECOLI Thiosulfate-binding protein  
P0A6L2 DAPA\_ECOLI Dihydrodipicolinate synthase  
P0A6L2 DAPA\_ECOLI Dihydrodipicolinate synthase  
P0A9D8 DAPD\_ECOLI 2,3,4,5-tetrahydropyridine-2,6-dicarboxylate N-succinyltra  
P0A9D8 DAPD\_ECOLI 2,3,4,5-tetrahydropyridine-2,6-dicarboxylate N-succinyltra  
P0A9D8 DAPD\_ECOLI 2,3,4,5-tetrahydropyridine-2,6-dicarboxylate N-succinyltra  
P0A9D8 DAPD\_ECOLI 2,3,4,5-tetrahydropyridine-2,6-dicarboxylate N-succinyltra  
P0A9D8 DAPD\_ECOLI 2,3,4,5-tetrahydropyridine-2,6-dicarboxylate N-succinyltra

P0A6K1 DAPF\_ECOLI Diaminopimelate epimerase  
P0A6K1 DAPF\_ECOLI Diaminopimelate epimerase  
P0ACF0 DBHA\_ECOLI DNA-binding protein HU-alpha  
P0ACF4 DBHB\_ECOLI DNA-binding protein HU-beta  
P0ACF4 DBHB\_ECOLI DNA-binding protein HU-beta  
P0ACF4 DBHB\_ECOLI DNA-binding protein HU-beta  
P69908 DCEA\_ECOLI Glutamate decarboxylase alpha  
P0AED9 DCM\_ECOLI DNA-cytosine methyltransferase  
P0A6J8 DDLA\_ECOLI D-alanine--D-alanine ligase A  
P0A9P6 DEAD\_ECOLI Cold-shock DEAD box protein A













P0ABT2 DPS\_ECOLI DNA protection during starvation protein  
P23827 ECOT\_ECOLI Ecotin  
P0A6M8 EFG\_ECOLI Elongation factor G  
P0A6N4 EFP\_ECOLI Elongation factor P  
P0A6P1 EFTS\_ECOLI Elongation factor Ts



P0CE47 EFTU1\_ECOLI Elongation factor Tu 1  
P0A6P7 ENGB\_ECOLI Probable GTP-binding protein engB  
P0ABU2 ENGD\_ECOLI GTP-dependent nucleic acid-binding protein engD  
P0ABU2 ENGD\_ECOLI GTP-dependent nucleic acid-binding protein engD  
P0A6P9 ENO\_ECOLI Enolase  
P0A6Q3 FAB\_A\_ECOLI 3-hydroxydecanoyl-[acyl-carrier-protein] dehydratase  
P0A953 FAB\_B\_ECOLI 3-oxoacyl-[acyl-carrier-protein] synthase 1







P0A6F3 GLPK\_ECOLI Glycerol kinase  
P0A6F3 GLPK\_ECOLI Glycerol kinase  
P0AC59 GLRX2\_ECOL Glutaredoxin-2  
P0AC59 GLRX2\_ECOL Glutaredoxin-2  
P0AC59 GLRX2\_ECOL Glutaredoxin-2  
P0AC59 GLRX2\_ECOL Glutaredoxin-2  
P0AC69 GLRX4\_ECOL Glutaredoxin-4  
P0A825 GLYA\_ECOLI Serine hydroxymethyltransferase  
P0A825 GLYA\_ECOLI Serine hydroxymethyltransferase  
P0A825 GLYA\_ECOLI Serine hydroxymethyltransferase  
P0A825 GLYA\_ECOLI Serine hydroxymethyltransferase  
P0ACP5 GNTR\_ECOLI HTH-type transcriptional regulator gntR  
P62707 GPMA\_ECOLI 2,3-bisphosphoglycerate-dependent phosphoglycerate mu  
P62707 GPMA\_ECOLI 2,3-bisphosphoglycerate-dependent phosphoglycerate mu  
P62707 GPMA\_ECOLI 2,3-bisphosphoglycerate-dependent phosphoglycerate mu  
P37689 GPMI\_ECOLI 2,3-bisphosphoglycerate-independent phosphoglycerate r  
P68066 GRCA\_ECOLI Autonomous glycy radical cofactor  
P68066 GRCA\_ECOLI Autonomous glycy radical cofactor

P09372 GRPE\_ECOLI Protein grpE  
P09372 GRPE\_ECOLI Protein grpE  
P09372 GRPE\_ECOLI Protein grpE  
P0AES4 GYRA\_ECOLI DNA gyrase subunit A  
P0AES4 GYRA\_ECOLI DNA gyrase subunit A  
P0AES4 GYRA\_ECOLI DNA gyrase subunit A  
P0AES6 GYRB\_ECOLI DNA gyrase subunit B  
P0AES6 GYRB\_ECOLI DNA gyrase subunit B  
P31658 HCHA\_ECOLI Chaperone protein hchA  
P0A8R9 HDFR\_ECOLI HTH-type transcriptional regulator hdfR  
P0A8R9 HDFR\_ECOLI HTH-type transcriptional regulator hdfR  
P0A8R9 HDFR\_ECOLI HTH-type transcriptional regulator hdfR  
P15038 HELD\_ECOLI Helicase IV  
P0A6X3 HFQ\_ECOLI Protein hfq  
P06987 HIS7\_ECOLI Histidine biosynthesis bifunctional protein hisB  
P06987 HIS7\_ECOLI Histidine biosynthesis bifunctional protein hisB  
P67910 HLDD\_ECOLI ADP-L-glycero-D-manno-heptose-6-epimerase  
P67910 HLDD\_ECOLI ADP-L-glycero-D-manno-heptose-6-epimerase  
P67910 HLDD\_ECOLI ADP-L-glycero-D-manno-heptose-6-epimerase  
P67910 HLDD\_ECOLI ADP-L-glycero-D-manno-heptose-6-epimerase  
P67910 HLDD\_ECOLI ADP-L-glycero-D-manno-heptose-6-epimerase





P43329 HSPA\_ECOLI ATP-dependent RNA helicase hrpA  
P0A6Z1 HSCA\_ECOLI Chaperone protein hscA  
P0A6Y5 HSLO\_ECOLI 33 kDa chaperonin  
P0ACG8 HSLR\_ECOLI Heat shock protein 15  
P0A6H5 HSLU\_ECOLI ATP-dependent protease ATPase subunit HslU  
P0A6Z3 HTPG\_ECOLI Chaperone protein htpG  
P0A6Z3 HTPG\_ECOLI Chaperone protein htpG  
P0A6Z3 HTPG\_ECOLI Chaperone protein htpG







P0A6X7 IHFA\_ECOLI Integration host factor subunit alpha  
P0A6Y1 IHFB\_ECOLI Integration host factor subunit beta  
P37326 INTS\_ECOLI Putative prophage CPS-53 integrase  
P0A7A9 IPYR\_ECOLI Inorganic pyrophosphatase  
P0A6B7 ISCS\_ECOLI Cysteine desulfurase  
P69441 KAD\_ECOLI Adenylate kinase  
P77338 KEFA\_ECOLI Potassium efflux system KefA  
Q52313 KORB1\_ECOLI Transcriptional repressor protein korB  
P0A717 KPRS\_ECOLI Ribose-phosphate pyrophosphokinase  
P0A717 KPRS\_ECOLI Ribose-phosphate pyrophosphokinase  
P0A717 KPRS\_ECOLI Ribose-phosphate pyrophosphokinase  
P0A717 KPRS\_ECOLI Ribose-phosphate pyrophosphokinase  
P0AD61 KPYK1\_ECOLI Pyruvate kinase I  
P0AD61 KPYK1\_ECOLI Pyruvate kinase I  
P0AD61 KPYK1\_ECOLI Pyruvate kinase I



























P0A910 OMPA\_ECOLI Outer membrane protein A  
P06996 OMPC\_ECOLI Outer membrane protein C  
P33136 OPGG\_ECOLI Glucans biosynthesis protein G  
P33136 OPGG\_ECOLI Glucans biosynthesis protein G  
P23843 OPPA\_ECOLI Periplasmic oligopeptide-binding protein  
P0COL2 OSMC\_ECOLI Peroxiredoxin osmC  
P0COL2 OSMC\_ECOLI Peroxiredoxin osmC  
P31677 OTSA\_ECOLI Alpha,alpha-trehalose-phosphate synthase [UDP-forming]  
P0ACQ4 OXYR\_ECOLI Hydrogen peroxide-inducible genes activator  
P0AFI2 PARC\_ECOLI DNA topoisomerase 4 subunit A  
  
P0AFI2 PARC\_ECOLI DNA topoisomerase 4 subunit A  
P0AFI2 PARC\_ECOLI DNA topoisomerase 4 subunit A  
P0AFI2 PARC\_ECOLI DNA topoisomerase 4 subunit A  
P02919 PBPB\_ECOLI D-ribose-binding periplasmic protein  
P22259 PCKA\_ECOLI Phosphoenolpyruvate carboxykinase [ATP]  
P22259 PCKA\_ECOLI Phosphoenolpyruvate carboxykinase [ATP]  
P22259 PCKA\_ECOLI Phosphoenolpyruvate carboxykinase [ATP]  
P0ABF1 PCNB\_ECOLI Poly(A) polymerase  
P0ABF1 PCNB\_ECOLI Poly(A) polymerase  
P0ABF1 PCNB\_ECOLI Poly(A) polymerase  
P0ABF1 PCNB\_ECOLI Poly(A) polymerase  
P0ABF1 PCNB\_ECOLI Poly(A) polymerase















P0A7D4 PURA\_ECOLI Adenylosuccinate synthetase  
P0A7D4 PURA\_ECOLI Adenylosuccinate synthetase  
P09546 PUTA\_ECOLI Bifunctional protein putA  
P28304 QOR1\_ECOLI Quinone oxidoreductase 1  
P28304 QOR1\_ECOLI Quinone oxidoreductase 1  
P60240 RAPA\_ECOLI RNA polymerase-associated protein rapA  
P0A7G2 RBFA\_ECOLI Ribosome-binding factor A  
P69407 RCSB\_ECOLI Capsular synthesis regulator component B  
P0A7G6 RECA\_ECOLI Protein recA  
P07012 RF2\_ECOLI Peptide chain release factor 2



P0A7X6 RIMM\_ECOLI Ribosome maturation factor rimM  
P0A7X6 RIMM\_ECOLI Ribosome maturation factor rimM  
P0A7X6 RIMM\_ECOLI Ribosome maturation factor rimM  
P0A8A8 RIMP\_ECOLI Ribosome maturation factor rimP  
P0A7L0 RL1\_ECOLI 50S ribosomal protein L1  
P0A7J3 RL10\_ECOLI 50S ribosomal protein L10  
P0A7J7 RL11\_ECOLI 50S ribosomal protein L11  
P0AA10 RL13\_ECOLI 50S ribosomal protein L13  
P0AA10 RL13\_ECOLI 50S ribosomal protein L13



|        |            |                           |
|--------|------------|---------------------------|
| P60422 | RL2_ECOLI  | 50S ribosomal protein L2  |
| P60422 | RL2_ECOLI  | 50S ribosomal protein L2  |
| P60422 | RL2_ECOLI  | 50S ribosomal protein L2  |
| P60422 | RL2_ECOLI  | 50S ribosomal protein L2  |
| P0A7L3 | RL20_ECOLI | 50S ribosomal protein L20 |
| P0A7L3 | RL20_ECOLI | 50S ribosomal protein L20 |
| P0A7L3 | RL20_ECOLI | 50S ribosomal protein L20 |
| P0A7L3 | RL20_ECOLI | 50S ribosomal protein L20 |
| P0AG48 | RL21_ECOLI | 50S ribosomal protein L21 |
| P0AG48 | RL21_ECOLI | 50S ribosomal protein L21 |
| P61175 | RL22_ECOLI | 50S ribosomal protein L22 |
| P61175 | RL22_ECOLI | 50S ribosomal protein L22 |
| P61175 | RL22_ECOLI | 50S ribosomal protein L22 |
| P61175 | RL22_ECOLI | 50S ribosomal protein L22 |
| P61175 | RL22_ECOLI | 50S ribosomal protein L22 |
| P61175 | RL22_ECOLI | 50S ribosomal protein L22 |
| P60624 | RL24_ECOLI | 50S ribosomal protein L24 |
| P60624 | RL24_ECOLI | 50S ribosomal protein L24 |
| P60624 | RL24_ECOLI | 50S ribosomal protein L24 |
| P60624 | RL24_ECOLI | 50S ribosomal protein L24 |
| P60624 | RL24_ECOLI | 50S ribosomal protein L24 |
| P68919 | RL25_ECOLI | 50S ribosomal protein L25 |
| P68919 | RL25_ECOLI | 50S ribosomal protein L25 |
| P68919 | RL25_ECOLI | 50S ribosomal protein L25 |
| P60438 | RL3_ECOLI  | 50S ribosomal protein L3  |
| P60438 | RL3_ECOLI  | 50S ribosomal protein L3  |
| P60438 | RL3_ECOLI  | 50S ribosomal protein L3  |
| P0AG51 | RL30_ECOLI | 50S ribosomal protein L30 |
| P0AG51 | RL30_ECOLI | 50S ribosomal protein L30 |
| P0AG51 | RL30_ECOLI | 50S ribosomal protein L30 |
| P0AG51 | RL30_ECOLI | 50S ribosomal protein L30 |
| P0AG51 | RL30_ECOLI | 50S ribosomal protein L30 |
| P0A7N9 | RL33_ECOLI | 50S ribosomal protein L33 |
| P0A7N9 | RL33_ECOLI | 50S ribosomal protein L33 |
| P60723 | RL4_ECOLI  | 50S ribosomal protein L4  |
| P60723 | RL4_ECOLI  | 50S ribosomal protein L4  |
| P60723 | RL4_ECOLI  | 50S ribosomal protein L4  |























































P10408 SECA\_ECOLI Protein translocase subunit secA  
P0AG86 SECB\_ECOLI Protein-export protein SecB  
P0AG86 SECB\_ECOLI Protein-export protein SecB  
P16456 SELD\_ECOLI Selenide, water dikinase  
P16456 SELD\_ECOLI Selenide, water dikinase  
P16456 SELD\_ECOLI Selenide, water dikinase  
P0AGB0 SERB\_ECOLI Phosphoserine phosphatase  
P0AGB0 SERB\_ECOLI Phosphoserine phosphatase  
P0AGB0 SERB\_ECOLI Phosphoserine phosphatase  
P23721 SERC\_ECOLI Phosphoserine aminotransferase  
P23721 SERC\_ECOLI Phosphoserine aminotransferase  
P23721 SERC\_ECOLI Phosphoserine aminotransferase  
P23721 SERC\_ECOLI Phosphoserine aminotransferase  
P23721 SERC\_ECOLI Phosphoserine aminotransferase



P21507 SRMB\_ECOLI ATP-dependent RNA helicase srmB  
P21507 SRMB\_ECOLI ATP-dependent RNA helicase srmB  
P0ACA3 SSPA\_ECOLI Stringent starvation protein A  
P0ACA3 SSPA\_ECOLI Stringent starvation protein A  
P0ACG1 STPA\_ECOLI DNA-binding protein stpA  
P0ACG1 STPA\_ECOLI DNA-binding protein stpA  
P0A836 SUCC\_ECOLI Succinyl-CoA ligase [ADP-forming] subunit beta  
P0AGE9 SUCD\_ECOLI Succinyl-CoA ligase [ADP-forming] subunit alpha  
P0AGE9 SUCD\_ECOLI Succinyl-CoA ligase [ADP-forming] subunit alpha  
P00957 SYA\_ECOLI Alanyl-tRNA synthetase  
P00957 SYA\_ECOLI Alanyl-tRNA synthetase  
P21889 SYD\_ECOLI Aspartyl-tRNA synthetase  
P21889 SYD\_ECOLI Aspartyl-tRNA synthetase  
P21889 SYD\_ECOLI Aspartyl-tRNA synthetase  
P21889 SYD\_ECOLI Aspartyl-tRNA synthetase  
P04805 SYE\_ECOLI Glutamyl-tRNA synthetase  
P04805 SYE\_ECOLI Glutamyl-tRNA synthetase  
P00956 SYI\_ECOLI Isoleucyl-tRNA synthetase  
P0A8N3 SYK1\_ECOLI Lysyl-tRNA synthetase  
P0A8N3 SYK1\_ECOLI Lysyl-tRNA synthetase  
P0A8N3 SYK1\_ECOLI Lysyl-tRNA synthetase  
P0A8N5 SYK2\_ECOLI Lysyl-tRNA synthetase, heat inducible  
P0A8M0 SYN\_ECOLI Asparaginyl-tRNA synthetase  
P0A8L1 SYS\_ECOLI Seryl-tRNA synthetase  
P0A8L1 SYS\_ECOLI Seryl-tRNA synthetase



P0A8L1 SYS\_ECOLI Seryl-tRNA synthetase  
P0A8L1 SYS\_ECOLI Seryl-tRNA synthetase  
P0A8L1 SYS\_ECOLI Seryl-tRNA synthetase  
P0A867 TALA\_ECOLI Transaldolase A  
P0A867 TALA\_ECOLI Transaldolase A  
P0A867 TALA\_ECOLI Transaldolase A  
P0A867 TALA\_ECOLI Transaldolase A  
P0A870 TALB\_ECOLI Transaldolase B  
P0AGL2 TDCF\_ECOLI Protein tdcF  
P0AGG2 TESB\_ECOLI Acyl-CoA thioesterase 2  
P0A847 TGT\_ECOLI Queuine tRNA-ribosyltransferase  
P77718 THII\_ECOLI tRNA sulfurtransferase  
P0AA25 THIO\_ECOLI Thioredoxin-1  
P0AA25 THIO\_ECOLI Thioredoxin-1  
P0AA25 THIO\_ECOLI Thioredoxin-1  
P31142 THTM\_ECOLI 3-mercaptopyruvate sulfurtransferase  
P31142 THTM\_ECOLI 3-mercaptopyruvate sulfurtransferase  
P0A850 TIG\_ECOLI Trigger factor  
P0A850 TIG\_ECOLI Trigger factor  
P0A850 TIG\_ECOLI Trigger factor



P0A853 TNAI\_ECOLI Tryptophanase  
P0A853 TNAI\_ECOLI Tryptophanase  
P06694 TNP2\_ECOLX Transposase for transposon Tn21  
P13694 TNP7\_ECOLX Transposase for transposon Tn3926  
P0A855 TOLB\_ECOLI Protein tolB  
P06612 TOP1\_ECOLI DNA topoisomerase 1  
P0A862 TPX\_ECOLI Thiol peroxidase  
P0A862 TPX\_ECOLI Thiol peroxidase  
P24082 TRAN\_ECOLI Protein traN  
P24082 TRAN\_ECOLI Protein traN  
P28904 TREC\_ECOLI Trehalose-6-phosphate hydrolase  
P28904 TREC\_ECOLI Trehalose-6-phosphate hydrolase  
P36673 TRER\_ECOLI HTH-type transcriptional regulator treR  
P36673 TRER\_ECOLI HTH-type transcriptional regulator treR  
P36673 TRER\_ECOLI HTH-type transcriptional regulator treR  
P0A8I5 TRMB\_ECOLI tRNA (guanine-N(7)-)-methyltransferase  
P0A8I5 TRMB\_ECOLI tRNA (guanine-N(7)-)-methyltransferase  
P16525 TUS\_ECOLI DNA replication terminus site-binding protein  
P75728 UBIF\_ECOLI 2-octaprenyl-3-methyl-6-methoxy-1,4-benzoquinol hydrox  
P75728 UBIF\_ECOLI 2-octaprenyl-3-methyl-6-methoxy-1,4-benzoquinol hydrox  
P12758 UDP\_ECOLI Uridine phosphorylase  
P0A8F0 UPP\_ECOLI Uracil phosphoribosyltransferase  
P0A8F0 UPP\_ECOLI Uracil phosphoribosyltransferase  
P08390 USG\_ECOLI USG-1 protein  
P0AED0 USPA\_ECOLI Universal stress protein A  
P37903 USPF\_ECOLI Universal stress protein F  
P39177 USPG\_ECOLI Universal stress protein G  
P39177 USPG\_ECOLI Universal stress protein G  
P39177 USPG\_ECOLI Universal stress protein G

P39177 USPG\_ECOLI Universal stress protein G  
P39177 USPG\_ECOLI Universal stress protein G  
P39177 USPG\_ECOLI Universal stress protein G  
P39177 USPG\_ECOLI Universal stress protein G  
P39177 USPG\_ECOLI Universal stress protein G  
P0A698 UVRA\_ECOLI UvrABC system protein A  
P0A698 UVRA\_ECOLI UvrABC system protein A  
P0A8G0 UVRC\_ECOLI UvrABC system protein C  
P0A8G6 WRBA\_ECOLI Flavoprotein wrbA  
P0A8G6 WRBA\_ECOLI Flavoprotein wrbA  
P0A8G6 WRBA\_ECOLI Flavoprotein wrbA  
P0A8G6 WRBA\_ECOLI Flavoprotein wrbA  
P30864 YAFC\_ECOLI Uncharacterized HTH-type transcriptional regulator yafC  
P77300 YAGI\_ECOLI Uncharacterized HTH-type transcriptional regulator yagI  
P21514 YAHA\_ECOLI Cyclic di-GMP phosphodiesterase yahA  
P21514 YAHA\_ECOLI Cyclic di-GMP phosphodiesterase yahA  
P75691 YAHK\_ECOLI Uncharacterized zinc-type alcohol dehydrogenase-like prot  
P0A8E7 YAJQ\_ECOLI UPF0234 protein yajQ  
P0A8E7 YAJQ\_ECOLI UPF0234 protein yajQ

P0A8E7 YAJQ\_ECOLI UPF0234 protein yajQ  
P75745 YBGK\_ECOLI Uncharacterized protein ybgK  
P30177 YBIB\_ECOLI Uncharacterized protein ybiB  
P75828 YBJD\_ECOLI Uncharacterized protein ybjD  
P75828 YBJD\_ECOLI Uncharacterized protein ybjD  
P21367 YCAC\_ECOLI Uncharacterized protein ycaC  
P22525 YCBB\_ECOLI Probable L,D-transpeptidase YcbB  
P22525 YCBB\_ECOLI Probable L,D-transpeptidase YcbB  
P0AB28 YCED\_ECOLI Uncharacterized protein yceD  
P27431 YCFD\_ECOLI Uncharacterized protein ycfD  
P75952 YCFQ\_ECOLI Uncharacterized HTH-type transcriptional regulator ycfQ  
P0A8L7 YCIU\_ECOLI UPF0263 protein yciU  
P77333 YCJZ\_ECOLI Uncharacterized HTH-type transcriptional regulator ycjZ  
P77730 YDCR\_ECOLI Uncharacterized HTH-type transcriptional regulator ydcR  
P77730 YDCR\_ECOLI Uncharacterized HTH-type transcriptional regulator ydcR  
P77730 YDCR\_ECOLI Uncharacterized HTH-type transcriptional regulator ydcR  
P64463 YDFZ\_ECOLI Putative selenoprotein ydfZ  
P64463 YDFZ\_ECOLI Putative selenoprotein ydfZ  
P76177 YDGH\_ECOLI Protein ydgH  
P76177 YDGH\_ECOLI Protein ydgH



|        |            |                                                         |
|--------|------------|---------------------------------------------------------|
| P76550 | YFFS_ECOLI | Uncharacterized protein yffS                            |
| P37767 | YFHH_ECOLI | Uncharacterized HTH-type transcriptional regulator yfhH |
| P37767 | YFHH_ECOLI | Uncharacterized HTH-type transcriptional regulator yfhH |
| P37767 | YFHH_ECOLI | Uncharacterized HTH-type transcriptional regulator yfhH |
| P37767 | YFHH_ECOLI | Uncharacterized HTH-type transcriptional regulator yfhH |
| P0AGJ5 | YFIF_ECOLI | Uncharacterized tRNA/rRNA methyltransferase yfiF        |
| P0AGJ5 | YFIF_ECOLI | Uncharacterized tRNA/rRNA methyltransferase yfiF        |
| P0AGJ5 | YFIF_ECOLI | Uncharacterized tRNA/rRNA methyltransferase yfiF        |
| P0AGJ5 | YFIF_ECOLI | Uncharacterized tRNA/rRNA methyltransferase yfiF        |
| P0AGJ5 | YFIF_ECOLI | Uncharacterized tRNA/rRNA methyltransferase yfiF        |
| P0AGJ5 | YFIF_ECOLI | Uncharacterized tRNA/rRNA methyltransferase yfiF        |
| P0AGJ5 | YFIF_ECOLI | Uncharacterized tRNA/rRNA methyltransferase yfiF        |
| P0AGJ5 | YFIF_ECOLI | Uncharacterized tRNA/rRNA methyltransferase yfiF        |
| P0AGJ5 | YFIF_ECOLI | Uncharacterized tRNA/rRNA methyltransferase yfiF        |
| P0AGJ5 | YFIF_ECOLI | Uncharacterized tRNA/rRNA methyltransferase yfiF        |
| P0AGJ5 | YFIF_ECOLI | Uncharacterized tRNA/rRNA methyltransferase yfiF        |
| P0AGJ5 | YFIF_ECOLI | Uncharacterized tRNA/rRNA methyltransferase yfiF        |
| P0AGJ5 | YFIF_ECOLI | Uncharacterized tRNA/rRNA methyltransferase yfiF        |
| P0AGJ5 | YFIF_ECOLI | Uncharacterized tRNA/rRNA methyltransferase yfiF        |
| P0AGJ5 | YFIF_ECOLI | Uncharacterized tRNA/rRNA methyltransferase yfiF        |
| P0AGJ5 | YFIF_ECOLI | Uncharacterized tRNA/rRNA methyltransferase yfiF        |
| P0AGJ5 | YFIF_ECOLI | Uncharacterized tRNA/rRNA methyltransferase yfiF        |
| P0AGJ5 | YFIF_ECOLI | Uncharacterized tRNA/rRNA methyltransferase yfiF        |
| P0AGJ5 | YFIF_ECOLI | Uncharacterized tRNA/rRNA methyltransferase yfiF        |
| P0ADE8 | YGFZ_ECOLI | tRNA-modifying protein ygfZ                             |
| P0ADE8 | YGFZ_ECOLI | tRNA-modifying protein ygfZ                             |
| P46837 | YHGF_ECOLI | Protein yhgF                                            |
| P37671 | YIAJ_ECOLI | HTH-type transcriptional regulator yiaJ                 |
| P37671 | YIAJ_ECOLI | HTH-type transcriptional regulator yiaJ                 |
| P37671 | YIAJ_ECOLI | HTH-type transcriptional regulator yiaJ                 |
| P37671 | YIAJ_ECOLI | HTH-type transcriptional regulator yiaJ                 |
| P37671 | YIAJ_ECOLI | HTH-type transcriptional regulator yiaJ                 |
| P37671 | YIAJ_ECOLI | HTH-type transcriptional regulator yiaJ                 |
| P37671 | YIAJ_ECOLI | HTH-type transcriptional regulator yiaJ                 |
| P37671 | YIAJ_ECOLI | HTH-type transcriptional regulator yiaJ                 |
| P37671 | YIAJ_ECOLI | HTH-type transcriptional regulator yiaJ                 |
| P37671 | YIAJ_ECOLI | HTH-type transcriptional regulator yiaJ                 |
| P37671 | YIAJ_ECOLI | HTH-type transcriptional regulator yiaJ                 |
| P37671 | YIAJ_ECOLI | HTH-type transcriptional regulator yiaJ                 |
| P37671 | YIAJ_ECOLI | HTH-type transcriptional regulator yiaJ                 |
| P0ADK6 | YIBA_ECOLI | Protein yibA                                            |

P0ADK6 YIBA\_ECOLI Protein yibA  
P0ADK6 YIBA\_ECOLI Protein yibA  
P0ADK6 YIBA\_ECOLI Protein yibA  
P0ADK6 YIBA\_ECOLI Protein yibA  
P0AG27 YIBN\_ECOLI Uncharacterized protein yibN  
P0AG27 YIBN\_ECOLI Uncharacterized protein yibN  
P32162 YIIS\_ECOLI UPF0381 protein yiiS  
P0AF93 YJGF\_ECOLI UPF0076 protein yjgF  
P0AF93 YJGF\_ECOLI UPF0076 protein yjgF  
P0AF93 YJGF\_ECOLI UPF0076 protein yjgF  
P39353 YJHC\_ECOLI Uncharacterized oxidoreductase yjhC  
P39356 YJHU\_ECOLI Uncharacterized transcriptional regulator yjhU  
P39356 YJHU\_ECOLI Uncharacterized transcriptional regulator yjhU  
P39356 YJHU\_ECOLI Uncharacterized transcriptional regulator yjhU  
P39376 YJIE\_ECOLI Uncharacterized HTH-type transcriptional regulator yjiE  
P0AAJ1 YNFG\_ECOLI Probable anaerobic dimethyl sulfoxide reductase chain ynf  
P0AAJ1 YNFG\_ECOLI Probable anaerobic dimethyl sulfoxide reductase chain ynf  
P16525 YP55\_ECOLX) DNA replication terminus site-binding protein  
P0A8W5 YQGE\_ECOLI UPF0301 protein yqgE  
P0A9W9 YRDA\_ECOLI Protein yrdA



Peptide

AAVLPANLIQAQR

EAYELVAPILTK

EFVESLETPR

GYTVSIFNR

IAAVAEDGEPCVTYIGADGAGHYVK

IVSYAQGFSQLR

KDEDGNYLVDVILDEAANK

VLSGPQAQPAGDKAEFIEK

AIWEQELTDmR

AIWEQELTDMR

ANYSNPPAHGASVVATILSNDALR

CTQELLFGK

INLGIGVYKDETGKTPVLTSVK

NYLGIDGIPEFGR

SVFNSAGLEVR

VGACTLVAADSETVDR

AQLLADLADLDVLSTEDLK

LAFDEFDELADR

SLNFLDFEQPIAELEAK

NALQELIIDGIK

VVEEAPAPGITPELR

ADQIQWSAGIEPGDPR

AmIEAGAAAVHFEDQLASVK

AMIEAGAAAVHFEDQLASVK

DGYTFVSHQQEVGTGYFDK

GLAYAPYADLVWCETSTPDLELAR

GSVNPECTLAQLGAAK

GYINSLGALTGGQALQQAK

KGYINSLGALTGGQALQQAK

LAADVTVPTLLVAR

LLAYNCSPSFNWQK

NLDDKTIASFQQQLSDMGYK

RADQIQWSAGIEPGDPR

THAGIEQAISR

TIASFQQQLSDMGYK

TQQIEELQK

TQQIEELQKEWTQPR  
VLVPTQEAIQK  
VTTIIQGGTSSVTALTGSTEEESQF  
WEGITRPYSAEDVVK  
DAASFAPLHNPAPHLIGIEEALK  
EGTRPAVVIPTNEELVIAQDASR  
FAIDAVNGEEYLSGLAECFHLPEAR  
LGVLGFEVDHER  
LVLVLNCGSSSLK  
YTSSVVIDESVIQGIK  
VLENLLR  
DLVHAIPLYAIK  
EGIEPDQPGVVGPIK  
GFPLAYVGDVVGTGSSR  
LPTPEEYQTYVAQVDK  
FSPGYmAmAHQLPVAGVVEAVIDGVR  
VAFENIEDAAR  
AADIVLQAAIAAGAPK  
AAYSSGKPAIGVGAGNTPVVIDETADIKR  
AVTNVAELNALVER  
EAGVQEADFLANVDK  
EAGVQEADFLANVDKLSEDAFDDQCTGANPR  
EYASFTQEQVDK  
FATHGGYLLQGK  
FLFNNGYADQITSVLK  
GAELANSFKPDVIALGGGSPmDAAK  
GAELANSFKPDVIALGGGSPMDAAK  
IAELAGFSVPENTK  
ILIGEVTVVDESEPFHEK  
ILINTPASQGGIGDLYNFK  
KGAELANSFKPDVIALGGGSPmDAAK  
LAPSLTLGCGSWGGNSISENVGPK  
LLAWLETLK  
LSPTLAMYR  
LVAmGGIGHTSCLYTDQDNQPAR  
LVAMGGIGHTSCLYTDQDNQPAR  
MAVAESGmGIVEDK

MAVAESGMGIVEDK  
MIAVTTTSGTGSEVTPFAVVTDDATGQK  
NAIIFSPHR  
NGALNAAIVGQPAYK  
NHFASEYIYNAYKDEK  
PAIGVGAGNTPVVIDETADIKR  
QILLDTYYGR  
RGSPIALDEVITDGHK  
TFDNGVICASEQSVVVVDSVYDAVR  
YAEIADHLGLSAPGDR  
YPLISELK  
AAQYVASHPGEVCPAK  
ATFVVPQGGIIQAIEVTAEGIGR  
EGEATLAPSLDLVGK  
EGEATLAPSLDLVGKI  
LGVDVYAVSTDTHFTHK  
NFDN<sup>m</sup>REDEGLADR  
NFDNMREDEGLADR  
NGEFIEITEK  
NGEFIEITEKDTEGR  
WKEGATLAPSLDLVGKI  
YA<sup>m</sup>IGDPTGALTR  
YAMIGDPTGALTR  
ASLSAFDYLR  
FGGQILDTVDIENYISVPK  
LIPAAVEGGLHQIETASGAVLK  
<QAGVYDLLSEAFVEVK  
AFSLAIYHAHQ  
EITHQLFLLGCGAQLK  
E<sup>m</sup>PVNSIWEGSGNIMCLDVLR  
EMPVNSIWEGSGNIMCLDVLR  
FDCALGSHAMMR  
GLLIG<sup>m</sup>GMTEK  
GLLIGMGTEK  
HVFGNPLIQQPL<sup>m</sup>R  
HVFGNPLIQQPLMR  
LANVNPPELLR

LSEQIQNDLLLR  
mALQLEGQTALLFR  
MALQLEGQTALLFR  
QAGVYDLLSEAFVEVK  
YASPPmAQAWCQVMLDTR  
YASPPMAQAWCQVMLDTR  
AFQELNAIDVL  
ANEAYLQGQLGNPK  
APVIVQFSNGGASFIAGK  
ENNFALPAVNCVGTDSINAVLETAAK  
IFDFVKPGVITGDDVQK  
LLPWIDGLLDAGEK  
VKAPVIVQFSNGGASFIAGK  
<QIEEISAAFER  
AGGmGLILGR  
AGGMGLILGR  
AGLINSGGAAGGETDLSDAVR  
AHELGmVTVLWAYLR  
AINYGYTDDR  
AINYGYTDDRVSYSK  
CmTIPSDQLYLPGHDYVDR  
CMTIPSDQLYLPGHDYVDR  
DADNLLQHR  
IPFLVK  
LAGTGYLSILPVDQGVEHSAGASFAANPLYFDPK  
LINAQDVYLDISK  
LTSENPIDLVR  
NIVELAIEAGCNCVASTYGVLASVSR  
NmQTLYNTGR  
NMQTLYNTGR  
QIEEISAAFER  
RQIEEISAAFER  
TDIAQLLGK  
VmIDNNRPPAVLR  
VMIDNNRPPAVLR  
YQLANCYmGR  
YQLANCYMGR

TSAESILTTGPVVPVIVVK  
ACGFTLPNAPLTPR  
ELVATLTELCER  
FDEVGNLYGR  
FPYVFWGSK  
LLYSPEWLETQQQFK  
mGDPLVLTFGK  
MGDPLVLTFGK  
NIFGLANPDDVR  
TLALmLYQLAWQK  
TNITDLAEGVK  
DISTALGLK  
DVLSVAGPFmR  
DVLSVAGPFMR  
FVSQGELVR  
GIAILQYLEK  
LmLLSGETVNVAIR  
LTEDRFVSQGELVR  
NGNEAVLIGQLECK  
SGGSSSVSDISLNLDLPLSTTFR  
NTEQAAFVVLK  
VEIAHK  
NEDIFIPLQVR  
NQVEQAGFAVLK  
QNVKQQLFALAPVAGFK  
QPSGSSVFALSTK  
TATFQQEVAESILAGIK  
VGQFDPQTVR  
VVVDIEDVNLNSVLK  
YLAQTQNASDLIGGVSK  
GATGRPVALLAQFLNR  
LVLCDVLTYVER  
FVEAEGFSVVR  
FLAFGETHLADVLSK  
WDAAQSLLATYIK  
QGITSYSLVPFPGH  
EQANVALmFLTGR

EQANVALMFLTGR  
HFESTPDTPEIIATIHGEGYR  
EVLEALANER  
NIFLVGPmGAGK  
NIFLVGPMGAGK  
NPLYEEIADVTIR  
VVANQIIHMLESN  
DLGAVFLVGIGGK  
ERAIK  
LGLIEVQAPILSR  
STVEAIWAGIK  
ALVDAGYDGIVSAGVGNLNYK  
GVLVVMNDTVLDGR  
SVFDTLATAAK  
VGIVYNYANASDLPAK  
VGVENLVNAVPQLK  
VPTGATTQDAEVDDAKYGFVASGTLNPQK  
ELAAFSQFASDLDDATR  
GPLDHDGFSAVEAIAPGVIER  
IAQFNVVSEAHNEGTVSVSDGVIR  
TALAIDAIINQR  
VNAEYVEAFTK  
YAIALNLER  
AAPSYEELSNSQELLETK  
DVLLFVDNIYR  
FLSQPFFVAEVFTGSPGK  
LVLEVQQQLGGGIVR  
QIASLGIYPAVDPLDSTSR  
YTLAGTEVSALLGR  
QVAILAVAGA EK  
SVDEAANSDIVDKLVAEL  
ILFLEGLPNLQDLGK  
LLGNELVAINQYFLHAR  
LNIGEDVEEMLR  
MGLQNYLQAQIR  
ASLVWDEAQK  
DPSLSLYAIPDGDVK

GPTLLEDFILR  
LFWLSQTPFEQR  
LIPEELVPVQR  
SADLLAILK  
VVAILLNDEV  
RAEYDQMWQHR  
TISYNLPVYNAFGmIEQEIPK  
TISYNLPVYNAFGMIEQEIPK  
ADAPLIQWDATSATLK  
GYDYPDIQR  
SATGLDEDALAFALLPLAAACAR  
TLLmDEQDHGYALTGDALSQAAIAAANR  
TPLSNFNVGAIAR  
VGDIVIFNDGYGVK  
<QQIEEATSDYDREK  
AAVEEGVVAGGGVALIR  
AGKPLLIAEDVEGEALATLVVNTmR  
AGKPLLIAEDVEGEALATLVVNTMR  
AIAQVGTISANSDETVGK  
AmLQDIATLTGGTVISEEIGmELEK  
AmLQDIATLTGGTVISEEIGMELEK  
AMLQDIATLTGGTVISEEIGmELEK  
AMLQDIATLTGGTVISEEIGMELEK  
ANDAAGDGTTTATVLAQAIITEGLK  
ATLEDLGQAK  
AVAAGmNPMDLK  
AVAAGMNPmDLK  
AVAAGMNPMDLK  
AVAAGMNPMDLKR  
AVTAAVEELK  
DTTTIIDGVGEEAAIQGR  
EGVITVEDGTGLQDELDVVEGmQFDR  
EGVITVEDGTGLQDELDVVEGMQFDR  
EIELEDKFENmGAQmVK  
EIELEDKFENMGAQmVK  
EIELEDKFENMGAQMVK  
EmLPVLEAVAK

EMLPVLEAVAK  
GGDGNYGYNAATEEYGNmIDmGILDPTK  
GGDGNYGYNAATEEYGNMIDMGILDPTK  
GVNVLADAVK  
GYLSPYFINKPETGAVELESPFILLADK  
GYLSPYFINKPETGAVELESPFILLADKK  
KAmLQDIATLTGGTVISEEIGmELEK  
LAGGVAVIK  
QIVLNCGEEPSVVANTVK  
QQIEEATSDYDREK  
RVVINKDTTTIIDGVGEEAAIQGR  
SALQYAASVAGLMITTECMVTDLPK  
SALQYAASVAGLMITTECMVTDLPK  
SFGAPTITK  
VEDALHATR  
VGAATEVEMK  
VVINKDTTTIIDGVGEEAAIQGR  
GTLGQDVIDIR  
ITFIDGDEGILLHR  
LYPNVDFYSGIILK  
YSIGQPFVYPR  
AIEALTEAIK  
ALGIELLR  
EALACSVDLVALR  
IDITEPSIEETVQIINGLKPK  
IFTPEFR  
IVQGDVPEVmADCTIYSLDIGSLLAGTK  
LDVVNFISHGTR  
LIGAPPGYVGFDQGGLLTDAVIK  
mENFTTNLNQLAR  
MENFTTNLNQLAR  
NELTYGFQSAQK  
NNPLLVGESGVGK  
NVVLVMTTNAGVR  
SIGLIHQDNSTDAmEEIKK  
SIGLIHQDNSTDAMEEIKK  
TAIAEGLAWR



TVNVADIESVVAR  
VGGIDPLIGR  
VIGSTTYQEFSNIFEK  
VIGSTTYQEFSNIFEKDR  
AAGATTANITQAIEQmR  
ADGAmDAGNMLKPALAR  
AGLADPNRPIGSFLFLGPTGVGK  
AIDLIDEAASSIR  
AIQQQIENPLAQQILSGELVPGK  
ELVLGVVSHNFRPEFINR  
GELHCVGATTLDEYR  
GYEIHISDEALK  
IDMSEFMEK  
LLENGYDPVYGAR  
LPQVEGTGGDVQPSQDLVR  
LVGAPPGYVGYEEGGYLTEAVR  
NTVVIMTSNLGSDLIQER  
QEGNVILFIDELHTmVGAGK  
QEGNVILFIDELHTMVGAGK  
QLPDKAIDLIDEAASSIR  
QYSELEEEWKAEK  
RLDMLNEELSDKER  
VFVAEPSVEDTIALR  
VIGQNEAVDAVSNAIR  
VLALDmGALVAGAK  
VLALDMGALVAGAK  
VTDAEIAEVLAR  
AETLYYIVK  
IAQTLLNLAK  
QLIQVNPDILmR  
VGNLAFLDVTGR  
AYSLLEQLR  
DLGYGLLLK  
FAIQIPYALGIIATR  
RYTPNVADATEAQIQQATK  
YTPNVADATEAQIQQATK  
FGDGIISAINFK

LDLADAILLSK  
DVVDAAVLR  
HLTQVTPAGQEIR  
LGLGVGVIASmAVDPVADPDLVR  
mLEDELGIQIFSR  
MLEDELGIQIFSR  
SNEEIEVMFK  
SVAGEHTWPKGSLYIATHTQAR  
VSLHmHQGSPTQIADAVSK  
VSLHMHQGSPTQIADAVSK  
YALPNVIK  
YIVEVNHNLNVSSTAEGLYTSQPGISK  
AEEIVASNPEK  
ALGANLVLTEGAK  
GVLKPGVELVEPTSGNTGIALAYVAAAR  
IFEDNSLTIGHTPLVR  
IGANMIWDAEK  
IQGIGAGFIPANLDLK  
LmEEEGILAGISSGAAVAAALK  
LMEEEGILAGISSGAAVAAALK  
LTLTmPETmSIER  
LTLTMPETMSIER  
LVDKVIGITNEEAISTAR  
NIVVILPSSGER  
RLmEEEGILAGISSGAAVAAALK  
RLMEEEGILAGISSGAAVAAALK  
VIGITNEEAISTAR  
YLLLQQFSNPANPEIHEK  
YLSTALFADLFTEK  
QALAILQGLK  
IPVIAGTGANATAEAI SLTQR  
LFVEPNPIPVK  
EAVNQVIALLD SGALR  
mQQLQNIIE TAFER  
VGINELLR  
VPAGSVV VSGNLPSK  
VPAGSVV VSGNLPSKDGK

ANIGFMQVVK  
MVLTVTDDDLVR  
AALESTLAAITESLK  
EGDAVQLVGFGTK  
IAAANVPAFVSGK  
TQLIDVIAEKAELSK  
TQLIDVIAEK  
ALDAIIASVTESLK  
EGDDVALVGFGTFAVK  
SQLIDKIAAGADISK  
CVNMVADLWHAPAPK  
DDVAFQIINDELYLDGNAR  
FGLAPLGGGWVIWR  
GFEmDFAELLLEDYK  
GFEMDFAELLLEDYK  
GWQVPAFTLGGEATDIVVmR  
GWQVPAFTLGGEATDIVVMR  
LGPYEFICTGRPDEGIPAVCFK  
LKDGEDPGYTLYDLSER  
LQGIAQQNSFK  
NWIDKEEYPQSAIDL  
PAGQVIAQYYEFLR  
QNLATFCQTWDDENVHK  
VQNASYQVAAYLADEIAK  
YWDVELR  
FIDLFAGIGGIR  
LLQIYDVK  
LMGFEAPGEAK  
QFGNSVVVPVFAAVAK  
TLVAQLNGVGENHWSAAILK  
VTLAQLLDPmVEAK  
VTLAQLLDPMVEAK  
DAGLNIAPFITLTR  
AEFETTFADLGLK  
ALLFVENR  
APILEALNDLGYEKPSPIQAECIPHLLNGR  
APQILVLAPTR

DVGDmQLYR  
DVGDMQLYR  
DVLGmAQTGSGK  
ELAVQVAEAmTDFSK  
ELAVQVAEAMTDFSK  
FLEAEDFDAIIFVR  
GMPGEVLQHFTR  
GVNVVALYGGQR  
HIVGAIANEGDISSR  
IEVGRDDGVEVR  
ILNKPmNmQLLGDAQPHTGGER  
ILNKPmNMQLLGDAQPHTGGER  
ILNKPMNmQLLGDAQPHTGGER  
ILNKPMNMQLLGDAQPHTGGER  
IQPTAEGEELDLETLAAALLK  
IQSSVTTRPDISQSYWTVWgmR  
IQSSVTTRPDISQSYWTVWGMR  
ISLVVNYDIPmDSESYVHR  
ISLVVNYDIPMDSESYVHR  
LDILIATDVAAR  
LFASHSTIELPK  
LKDGRDLILIATDVAAR  
LSGLVLDEADEmLR  
LSGLVLDEADEMLR  
LTIPEVELPNAELLGK  
mGFIEDVETIMAQIPEGHQTALFSATMPEAIR  
MGFIEDVETImAQIPEGHQTALFSATMPEAIR  
MGFIEDVETIMAQIPEGHQTALFSATMPEAIR  
MGFIEDVETIMAQIPEGHQTALFSATMPEAIRR  
NATLEVAEALER  
NGYNSAALNGDmNQALR  
NGYNSAALNGDMNQALR  
QGPQIVVGTPGR  
RDVGDMQLYR  
TAAFSPLLLQNLDPELKAPQILVLAPTR  
TAAFSPLLLQNLDPELK  
TKNATLEVAEALER

TLIVPPDAPmRPK  
TLIVPPDAPMRPK  
VQQQLESSDLDQYR  
LVLINPELLEK  
GAFVSQVLPNSSAAK  
ATGLDALFDATIK  
DVAGYAAGLELFDR  
ETFADIGQTLAK  
FGDVGADTLGHIAEACAK  
GPLNLPNLTR  
TGNRHDLAVEPPAPTVLQK  
ALmAGNEQVGFDLVK  
FGASSLLASLLK  
IATVTNFPHGNDIDIALAETR  
TPVGNTAAICIYPR  
ALTICTVSDHIR  
ATPHINAEmGDFADVVLmPGDPLR  
IAESVLLGDKE  
YIAETFLEDAR  
FWDYQQGSWQEEQQTK  
LINDVQDVLDEQLAGLAK  
VIALVNNLGATPLSELYGVYNR  
QLAEDNFGETE EVAPPTLRPVPPVSGK  
INQLVVEPTLQTTR  
VLTQTMVTSADEGGLHTK  
AGVEVDDR  
AGVEVDDRGFIR  
AIASDCADGmTK  
AIASDCADGMTK  
ALAEHGIVFGEPK  
APAEPQRYDAVLVAIGR  
CADLGLETVIVER  
EDGIYVTmEGK  
EDGIYVTMEGK  
EDGIYVTMEGKK  
EKGISYETATFPWAASGR  
EKVINQLTGGLAGmAK

EKVINQLTGGLAGMAK  
FNLmLETK  
FNLMLETK  
FTGANTLEVEGENGK  
GISYETATFPWAASGR  
GVHEGHVAAEVIAGK  
GVHEGHVAAEVIAGKK  
IWDSTDALELK  
IWDSTDALELKEVPER  
KAPAEPQR  
KAPAEPQRYDAVLVAIGR  
KFNLmLETK  
KFNLMLETK  
LIFDK  
LIFDKESHR  
NLDAGKAGVEVDDRGFIR  
NLDAGK  
PIQLPFIPHEDPR  
STEIKTQVVVLGAGPAGYSAAFR  
TDIDKIR  
TNVPHIFAIGDIVGQPmLAHK  
TNVPHIFAIGDIVGQPMLAHK  
TQVVVLGAGPAGYSAAFR  
TVINFDNAIIAAGSR  
TVINFDNAIIAAGSRPIQLPFIPHEDPR  
VIEEAKALAEHGIVFGEPK  
VINQLTGGLAGmAK  
VINQLTGGLAGMAK  
VINQLTGGLAGMAKGR  
VIPSIAYTEPEVAWVGLTEK  
VIPSIAYTEPEVAWVGLTEKEAK  
VTAVEAKEDGIYVTmEGK  
VTAVEAKEDGIYVTmEGKK  
VTAVEAKEDGIYVTMEGK  
VTAVEAKEDGIYVTMEGKK  
VVNGLGK  
YDAVLVAIGR

YNTLGGVCLNVGCIPSK  
AVLFLYLNR  
GEFNVPFGR  
HIPVLISNHDTMLTR  
<QLLQELQESFGGPTGEHNSPR  
AKQDYIEILGVSK  
FFDDLTR  
LAGEGEAGEHGAPAGDLYVQVQVK  
QLLQELQESFGGPTGEHNSPR  
VVVETPVGLNER  
YNmELTLEEAVR  
YNMELTLEEAVR  
<QAVTNPQNTLFAIK  
AKIELSSAQQTDVNLPYITADATGPK  
AKLESLVEDLVNR  
ASSGLNEDEIQK  
DAEANAADRKFEEVLQTR  
DVSImPFK  
DVSIMPFK  
FQDEEVQR  
HSQVFSTAEDNQSAVTIHVLQGER  
IELSSAQQTDVNLPYITADATGPK  
IIAADNGDAWVEVK  
IIGIDLGTTNSCVAIMDGTTTPR  
IIGIDLGTTNSCVAIMDGTTTPR  
IINEPTAAALAYGLDK  
IINEPTAAALAYGLDKGTGNR  
KDVNPDEAVAIGA AVQGGVLTGDVK  
KFEELVQTR  
KVAEFFGKEPR  
LESLVEDLVNR  
LINYLVVEEFK  
LINYLVVEEFK  
mAPPQISAEVLK  
mAPPQISAEVLKK  
MAPPQISAEVLK  
MAPPQISAEVLKK

NDPLAMQR  
QAVTNPQNTLFAIK  
QAVTNPQNTLFAIKR  
RIINEPTAAALAYGLDK  
SIEPLKVALQDAGLSVSDIDDVILVGGQTR  
SLGQFNLDGINPAPR  
TAEDYLGEVPTEAVITVPAYFNDAQR  
TAIESALTALETALKGEDK  
TFEVLATNGDTHLGGEDFDSR  
TTPSIIAYTQDGETLVGQPAK  
TTPSIIAYTQDGETLVGQPAKR  
VAEFFGKEPR  
VALQDAGLSVSDIDDVILVGGQTR  
VLENAEGDRTPSIIAYTQDGETLVGQPAKR  
AHVGDFIFTSK  
FFDICR  
GLPEGAEIAVQLEGER  
KFFDICR  
LAVCSmPIGQSLPSHSVIVPR  
LAVCSMPIGQSLPSHSVIVPR  
LIEATQFSmAHQDVR  
LIEATQFSMAHQDVR  
LYVSENQLK  
mLDGGDNPLR  
VALVQPHEPGATTVPAR  
YYLNGmLFETEGEELR  
YYLNGMLFETEGEELR  
<QVIQFIDLSLITK  
AIGEAKDDDTADILTAASR  
ATNLLYTR  
ATVELLNR  
AVQLGGVALGTTQVINSK  
DDDTADILTAASR  
FLWFIESNIE  
GANFIAVHEmLDGFR  
GANFIAVHEMLDGFR  
KAIGEAKDDDTADILTAASR



KATVELLN  
QVIQFIDLSLITK  
SYPLDIHNVQDHLK  
TALIDHLDTmAER  
TALIDHLDTMAER  
YAIVANDVR  
YAIVANDVRK  
LPIVVYTPDNVDVK  
AGDIAAAIGLK  
AGPLAGYPVVDmGIR  
AGPLAGYPVVDMGIR  
AKPVLLEPImK  
AKPVLLEPIMK  
ASYTmEFLK  
ASYTMEFLK  
DVTTGDTLCDPDAPIILER  
EFNVEANVGKQVAYR  
GGVIPGEYIPAVDK  
GITITSAATTAFWSGMAK  
GQYGHVVIDmYPLEPGSNPK  
GYEFINDIK  
HASDDEPFSALAFK  
IATDPFVGNLTFFR  
IGEVHDGAATmDWmEQEQER  
IGEVHDGAATmDWMEQEQER  
IHAEVPLSEMFGYATQLR  
INIIDTPGHVDFTIEVER  
LGANPVPLQLAIGAEHFTGVVDLVK  
mEFPEPVISIAVEPK  
MEFPEPVISIAVEPK  
VEVETPEENTGDVIGDLSR  
VLNNEIILVTCGSAFK  
VYSGVVNSGDTVLNSVK  
YDEAPSNVAQAVIEAR  
YLGGEELTEAEIK  
VPLFVQIGEVK  
ALTEANGDIELAIENMR

DAGFQAFADK  
FEVGEGIEKVETDFAAEVAAmSK  
FTGEVSLTGQPFVmEPSK  
FTGEVSLTGQPFVMEPSK  
VAALEGDVLGSYQHGAR  
<QVGVPYIIVFLNK  
AFDQIDNAPEEK  
AGENVGVLLR  
AIDKPFLPIEDVFSISGR  
ALEGDAEWEAK  
CDmVDDEELLELVEmEVR  
CDmVDDEELLELVEMEVR  
CDMVDDEELLELVEmEVR  
CDMVDDEELLELVEMEVR  
EHILLGR  
ELLSQYDFPGDDTPIVR  
FESEVYILSK  
FESEVYILSKDEGGR  
GITINTSHVEYDTPTR  
GQVLAKPGTIKPHTK  
GYRPQFYFR  
HYAHVDCPGHADYVK  
ILELAGFLDSYIPEPER  
mVVTLIHPIAmDDGLR  
mVVTLIHPIAMDDGLR  
MVVTLIHPIAmDDGLR  
MVVTLIHPIAMDDGLR  
NmitGAAQmDGAILVVAATDGPmPQTR  
NmitGAAQmDGAILVVAATDGPMPQTR  
NmitGAAQMDGAILVVAATDGPmPQTR  
NmitGAAQMDGAILVVAATDGPMPQTR  
NMITGAAQmDGAILVVAATDGPMPQTR  
NMITGAAQMDGAILVVAATDGPmPQTR  
NMITGAAQMDGAILVVAATDGPMPQTR  
QVGVPYIIVFLNK  
STCTGVEmFR  
STCTGVEMFR

TKPHVNVGTIGHVDHGK  
TTDVTGTIELPEGVE<sup>m</sup>V<sup>m</sup>PGDNIK  
TTDVTGTIELPEGVE<sup>m</sup>VMPGDNIK  
TTDVTGTIELPEGVEMV<sup>m</sup>PGDNIK  
TTDVTGTIELPEGVEMVMPGDNIK  
TTLTAAITTVLAK  
TTLTAAITTVLAKTYGGAAR  
VGEEVEIVGIK  
VGEEVEIVGIKETQK  
HLPSDTGIEVAFAGR  
QSLQGLVVL<sup>m</sup>DIR  
SSALNTLTNQK  
TNLNYQQTHFVMSAPDIR  
TQLINLFEVADGKR  
LDQLAEIVK  
STLFNALK  
AFTSEEFTHFLEELTK  
AKG<sup>m</sup>NTAVGDEGGYAPNLGSNAEALAVIAEAVK  
AVAAVNGPIAQALIGK  
DAGYTAVISHR  
DAKDQAGIDKI<sup>m</sup>IDLDGTENK  
DITLA<sup>m</sup>DCAASEFYK  
DITLAMDCASEFYK  
DQAGIDKI<sup>m</sup>IDLDGTENK  
FGANAILAVSLANAK  
FNQIGSLTETLAAIK  
GIANSILIK  
G<sup>m</sup>NTAVGDEGGYAPNLGSNAEALAVIAEAVK  
GMNTAVGDEGGYAPNLGSNAEALAVIAEAVK  
GNPTVEAEVHLEGGFVG<sup>m</sup>AAAPSGASTGSR  
GNPTVEAEVHLEGGFVGMAAAPSGASTGSR  
IQLVGDDLFVTNTK  
QYPIVSIEDGLDESDWDGFAYQTK  
SGETEDATIADLAVGTAAGQIK  
VLGDKIQLVGDDLFVTNTK  
LIMGLADGEVLVDGR  
AVITGLGIVSSIGNNQQEVLASLR

ACEEAAEGQVVSPVNFNSPGQVVIAGHK  
SVEYMAAQGVEHLYEVGPGK  
DAGIEASQIGYVNAHGTSTPAGDKAEAQAVK  
FDGFVHSIGFAPGDQLDGDYVNAVTR  
FPFLLVDR  
LEPGELYFAGIDEAR  
SVGKLEPGELYFAGIDEAR  
TTNHTLQIEEILELLPHR  
LFALDK  
YFATGAATPGAANADATFK  
QFNNIGATTPVVPFR  
AGSLIAVLIR  
YSGSSYPFPTTSETPR  
AALMMGINR  
VNSDVLTVSTVNSQDQVTQKPLR  
LIDGTVFDSSVAR  
AITGIFFGSDTGNTENIAK  
AYVGVDPVKEIPVRPTAHYTMGGIETDQNCETR  
YLQDYGMGPETPLGEPK  
AISDLVADGVLIR  
IAFDQNDKPVHVSELCR  
VENALLTVSGFTDFGVSQGK  
LFDYLTDGTLPR  
SGEGLYFIDKELSTLDTQN  
LmSALGVR  
GISLLDAFGAANDVLK  
HVDLITIPNDK  
IEGVEFFAVNTDAQALRK  
MAFAEQGITELSK  
TAVGQTIQIGSGITK  
TPAGYPSGSLGPTTAGR  
AGIALNDNFVK  
DNTPmFVK  
FDGTVEVKDGHVINGK  
GANFDKYAGQDIVSNASCTTNCLAPLAK  
GASQNIIPSSTGAAK  
GVLGYTEDDVVSTDFNGEVCTSVFPAK

KVVmTGPSKDNTPMFVK  
LVSWYDNETGYSNK  
VINDNFGIIEGLmTTVHATTATQK  
VINDNFGIIEGLMTTVHATTATQK  
VLDLIAHISK  
VPTPNVSVVDLTVR  
VPTPNVSVVDLTVRLEK  
VTAERDPANLK  
YAGQDIVSNASCTTNCLAPLAK  
AGQMR  
ETVLNLLALR  
HFDEmKDVTIADLFAK  
LLSNFFAQTEALAFGK  
SNTPILVDGKDVMPEVNAVLEK  
TFSEAIISGEWK  
VNPETTFLVASK  
ANTGVTLEPINSQNAPK  
NLLPAAFAK  
CVENFVFVSR  
DIPVFQEVAQLSQNK  
DSAASIVAQGNFYGTDR  
DTLSLFLPMLK  
EFAEATGIDSLAVAIGTAHGMYSAPALDFSR  
QWVNLPLVLHGASGLSTK  
AAVLCFAAESVATDCQR  
EFVFTIADK  
TGFNDSLLDIR  
VGPALTFALR  
LTDILAAGLQQK  
SDILNAVGITLDETTTR  
AVFALGAGVDSILSK  
AmLAAEQHVVTPALER  
AMLAAEQHVVTPALER  
CTQAALALAEELCYNTLLEEGER  
DAGLVVEIAPFGGECSEQNEIDR  
FLQWE  
FVLGFAQSTVEK

GIAETAQCGAILGIGGGK  
IVAEEACAEGETIHNMPGGATPDQVYAALLVADQYGQF  
LGEYLKPLAER  
LLAAGIGDALATWFEAR  
SFKDAGLVVEIAPFGGECSEQNEIDR  
WLVVGDK  
WLVVGDKFVLGFAQSTVEK  
YIQGADVIR  
YLLLPNNPNmVIVDTK  
YLLLPNNPNMVIVDTK  
VGDEPYYPVNDNK  
LALCDIASGEISQAK  
AGGVFTDEAIDAYIALR  
AINALANPTTNSYK  
EIPQVAGSLEEALNELDLDFEFLK  
GGYFPVPPVDSAQDIR  
GKEQHVTIPAHQVNAEFFEFGK  
LVPGYEAPVMLAYSAR  
SAEHVLTMLNEHEVK  
LVVATDTAFVPPFEFK  
DLIVIGGGINGAGIAADAAGR  
DYTLDIHDENGKAPLLSVFGGK  
ESVLPGGAIEGDRDDYAAR  
FGANSVLKPEIK  
GLSVLMLEAQDLACATSSASSK  
GLVNATGPWVK  
IEESEINYLLNVYNTHFK  
LTPYYQGIGPAWTK  
LVLANAQmVVR  
LVLANAQMVVR  
LVSEALAER  
RYPFLTESLAR  
TYGSNSELLGNAGTVSDLGEDFGHEFYEAELK  
VSQWLVEYTQQR  
YLEHYEFR  
YLV DHEWVR  
YPFLTESLAR

LINDAYDSEYFATK  
VDGGAVANNFLMQFQSDILGTR  
LLLPR  
QTQINLLSSmAI  
SAFDEFSTPAAR  
SPAIEEWLR  
QIAENPILLYMK  
LYNIVPYGIDATGHIDYADLEK  
VRQEEHIELIASENYTSR  
VVSGGTDNHLFLVDLVDK  
VVSGGTDNHLFLVDLVDKNLTGK  
AIGVLLPSLTNQVFAEVL  
FLRNPEQVSVALR  
IAAALDELGYIPNRAPDILSNATSR  
IAAALDELGYIPNR  
KRPVLQDVADR  
LASVLTPR  
mIEVAGIPVVELmDSK  
mIEVAGIPVVELMDSK  
mLDLGFTLSPGGSI  
MIEVAGIPVVELmDSK  
MIEVAGIPVVELMDSK  
MLDLGFTLSPGGSI  
SPCLDIAVGFDNF EAAR  
VPDDmAIAGFHGHDIGQV mEPR  
ELPLTESLALTIDR  
VIPYWNETILPR  
YYLGN ADEIAAK  
AFFANPVL TGAVDK  
AFVNADFDG FAR  
AYDLLT LAQGEFQADTAVAGLQAAYAR  
VATYDLQPEMSSAELTEK  
AANDDLLNSFWLLDSEK  
AANDDLLNSFWLLDSEKGEAR  
AGYAEDEVVAVSK  
EVPVEVKPEVR  
LGDIEYR

ANPDMSAMVEGIELTLK  
FINELLPVIDSLDR  
VANLEAQLAEAQTR  
ETIIVHEIPYQVNK  
ITAILPVTEFEEGVK  
LGEGDKVVSLIVPR  
FDVHTNAEQNLFEPIVR  
TLLLTFFYR  
ILVIAADER  
KLLTGDSPFAANALGK  
LLTGDSPFAANALGK  
MGMNIINDDITGR  
LYQNQDAHTGLQFEAR  
PLYAIWLQNSDK  
QLDLLITTEAPK  
AENAVDFSGLIHQAVILEK  
AVTLLDESQLDALLDK  
AVVNGEHSLLVLAGAGSGK  
ENPSPFVEILK  
FSGAQ<sub>m</sub>SLTTAFHENFGGER  
GEASPEQILLAFGR  
GLVWGELEFVLPDEK  
QALSALPLPVNR  
QQLDLIATR  
AKGQSLQDPFLNALR  
ERVPVSIYLVNGIK  
GQSLQDPFLNALR  
LQGQIESFDQFVILLK  
NTVSQMVK  
VPVSIYLVNGIK  
FGFVLPMDDECLAR  
LAFEPGVIPELLK  
AESFQAVADATLAYHK  
EIPFLYASSAATYGGR  
EYEKPLNVYGYSK  
FLFDEYVR  
GITDILVVDNLK



mIIVTGGAGFIGSNIVK  
MIIVTGGAGFIGSNIVK  
QILPEANSQIVGFR  
TVAEGVTEYMAWLNR  
YFNVYGPR  
YMMDNQYQYSK  
YQAFTQADLTNLR  
SYIDYYEEGK  
EmLIADGIDPNELLNSLA AVK  
SLDDFLIKQ  
AELNDTVVDIAK  
AWPALVDER  
EAARPEITYPDNLPVSQK  
EAmIITSALS IQDPR  
EAMIITSALS IQDPR  
ELGIPVNSEPAEYR  
ELVIALIK  
ETPDLLNFEK  
FSIFPGSGLFK  
HALVEGDWQTR  
HFNNAPIIEVSGR  
HTEILPLYAR  
IAEELKTEPGGCIGYK  
IIITSATIDPER  
ILQAMEQISG  
IVLATNVAETSLTVPGIK  
LFDNPLEQK  
LGLYFNPYGK  
LIDANGGPVWTEEGFAALHEK  
LLEELGAI TTDEQASAYK  
LLLLNIPSPIK  
LLmQYDTIIIIDEAHER  
LLMQYDTIIIIDEAHER  
LmTDGILLAEIQQDR  
LMTDGILLAEIQQDR  
LPIEPISQASANQR  
LTFTALQQR

LYSEDDFLSRPEFTDPEILR  
NFVPAPNYAEAFGLR  
NPDAQQAIFQEmAK  
NPDAQQAIFQEMAK  
QVEQILTAVFNINK  
QVEQILTAVFNINKR  
SLNIDFLLGYLK  
SLQDLKDALK  
TDYLNLYR  
VDmTmALGLSDIK  
VDMTmALGLSDIK  
VDMTMALGLSDIK  
VENVQQAWQQWINK  
VKPLELPLLSLER  
VLELIDDCISCGVDK  
VRAELNDTVVDIAK  
VREWQDIYTQLR  
VSYFAQQLGTPYPISDKR  
VTVYGLPIVAAR  
WmIEELR  
WMIEELR  
WVmVAELVETSR  
VEAAR  
YLFENFAVR  
KLNALTMPPDR  
LDKWLWAAR  
RPASEAALLYEETAESVEK  
RPASEAALLYEETAESVEKR  
EIVSELDKHIIGQDNAK  
HLDALVADEDLSR  
IAEAAWQVNESTENIGAR  
ILDVLIPPAK  
ILTEPNASITVQYK  
QDAIDAVEQHGIVFIDEIDK  
ALSNDLYEGDGELR  
EGPAEDFANQEAIK  
GTLEDPNLFIR

NKSEITDEEYKEFYK  
AFLAQLSEEQVTK  
KPAVATAPATGQVQSLTR  
LLTTmQQQGFVR  
NLLAIVHPILR  
AAIEYAIANDRDSVTLVHK  
EEFGGELIDGGPWLK  
STQVYGQDVWLPAETLDLIR  
AKEDNIEmQGTVLETLPNTmFR  
AKEDNIEmQGTVLETLPNTMFR  
AKEDNIEMQGTVLETLPNTmFR  
AKEDNIEMQGTVLETLPNTMFR  
ILTGDKVTVELTPYDLSK  
VELENGHVVTAHISGK  
VTVELTPYDLSK  
<QQIIGLAEVR  
AAmSGmLSPELK  
AAMSGmLSPELK  
AAMSGMLSPELK  
AAQVPVVAVNK  
AAQVPVVAVNKIDKPEADPDR  
ADVQGSVEAISDSLLK  
APVVTImGHVDHGK  
APVVTIMGHVDHGK  
DNVVIYEGELESRLR  
DNVVIYEGELESRLR  
DVVIGETITVGELANK  
ENELEEAVmSDR  
ENELEEAVmSDRDTGAAAEP  
ENELEEAVMSDR  
ENELEEAVMSDRDTGAAAEP  
FGAIAGCmVTEGVVK  
FGAIAGCmVTEGVVKR  
FGAIAGCMVTEGVVK  
FGAIAGCMVTEGVVKR  
FKDDVNEVR  
GAQATDIVVLVVAADDGVmPQTIEAIQHAK

GAQATDIVVLVVAADDGVMPQTIEAIQHAK  
GDIVLCGFYGR  
GmASGAVIESFLDK  
GmASGAVIESFLDKGR  
GMASGAVIESFLDK  
GMASGAVIESFLDKGR  
GPVATVLVR  
GSSLQQGFQKPAQAVNR  
IIGSGVGGITETDATALAAASNAILVGFNVR  
KGmASGAVIESFLDK  
KGmASGAVIESFLDKGR  
KGMASGAVIESFLDK  
KGMASGAVIESFLDKGR  
KGSSLQQGFQKPAQAVNR  
KVIEAESDLR  
LAAEEQAQR  
LAAEEQAQREAEQAR  
LENmFANmTEGEVHEVNIVLK  
LGAmATINQVIDQETAQLVAEEmGHK  
LGAmATINQVIDQETAQLVAEEMGHK  
LGAMATINQVIDQETAQLVAEEmGHK  
LGAMATINQVIDQETAQLVAEEMGHK  
LVQQFADAGIR  
mAEENKWTDNAEPTEDSSDYHVTTSQHAR  
MAEENKWTDNAEPTEDSSDYHVTTSQHAR  
NELGQEVLEAGPSIPVEILGLSGVPAAGDEVTVVR  
NELGQEVLEAGPSIPVEILGLSGVPAAGDEVTVVRDEK  
NELSQYGILPEEWGGESQFVHVS AK  
NGMECGIGVK  
QQIIGLAEVR  
RENELEEAVmSDRDTGAAAEPR  
RmAEENKWTDNAEPTEDSSDYHVTTSQHAR  
RMAEENKWTDNAEPTEDSSDYHVTTSQHAR  
SKLENmFANmTEGEVHEVNIVLK  
SKLENmFANMTEGEVHEVNIVLK  
SKLENMFANmTEGEVHEVNIVLK  
SKLENMFANMTEGEVHEVNIVLK

TGDVIEVFEIIEIQR  
TSLLDYIR  
VIEAESLDLR  
VKNELSQYGILPEEWGGESQFVHVSAK  
WTDNAEPTEDSSDYHVTTSQHAR  
YYSVIYNLIDEVK  
<QMIMVLAPK  
AEEAGVDLVEISPNAEPPVCR  
DDLQELAVVESFPTK  
DDLQELAVVESFPTKIEGR  
EALEKAAEEAGVDLVEISPNAEPPVCR  
EmAHQQIGmEVLNR  
EmAHQQIGMEVLNR  
EMAHQQIGmEVLNR  
EMAHQQIGMEVLNR  
FLEEGDKAK  
FLYEK  
FRPGTDEGDYQVK  
GREmAHQQIGmEVLNR  
GREmAHQQIGMEVLNR  
GREMAHQQIGmEVLNR  
GREMAHQQIGMEVLNR  
ImDYGK  
IMDYGK  
LTGLEGEQLGIVSLR  
QmImVLAPK  
QmIMVLAPK  
QMImVLAPK  
QMIMVLAPK  
VKDDLQELAVVESFPTK  
VKDDLQELAVVESFPTKIEGR  
AEmSEYLFDK  
AEMSEYLFDK  
AEMSEYLFDKLGLSK  
ELVELFFEEIR  
ELVELFFEEIRR  
LSGFGNFDLR

TGEDIPITAR  
EMLEHMASTLAQGER  
GFGSFSLHYR  
TVEDAVKEmLEHmASTLAQGER  
TVEDAVKEmLEHMASTLAQGER  
TVEDAVKEMLEHMASTLAQGER  
ALATFSGSIVSLIATK  
IITIDASVMK  
LLDGNGLYLYVPVSGK  
NFPFLPADQIPAFNK  
EYDHIKDVNDLPELLK  
ALGLNDELAHSSIR  
EIVFTSGATESDNLAIK  
IYGPK  
LPIDLSQLK  
NQIADLVGADPR  
LVTDELVIALVK  
<QATAALTALSDVDNDEETRK  
DALFQSDAFVNK  
IADLRLEQFEVNQQR  
IGDVTIGSFSGTVSK  
ILSTLSLR  
LEHQLQLLQEAVNSK  
LINWSLTDTTTR  
LVQQDLTDTLATLDK  
LVQQDLTDTLATLDKIDR  
QATAALTALSDVDNDEETRK  
QELEINQQLSQR  
SLEGNTVLQDTLQK  
GEIAK  
FSDGEVSVQINENVR  
ITAVIPYFGYAR  
LFAGNATPELAQR  
VVADFLSSVGVD  
AEAGDVANAILDGTDAVmLSGESAK  
AEAGDVANAILDGTDAVMLSGESAK  
EITSTDDFYR

GAVETAEKLDAPLIVVATQGGK  
GDLGVEIPVEEVIFAQK  
GVNLPGVSIALPALAEK  
LNFSHGDYAEHGQR  
EKVGIDYK  
GLPADVVPGDILLDDGR  
GVTPVHFDSANDGVAAASEAVNLLR  
<QVRPGADYNWSLK  
ALDILTATPPDVFHNHLENVPR  
CPFCDVAHGRPVAPDANEPVK  
DGGAQHFADCITAIR  
HGVTmLTGQYLQPSR  
HGVTMLTGQYLQPSR  
IETLVPDFR  
LAQTIADMALR  
QVRPGADYNWSLK  
SGLmVGLGETNEEIIIEVmR  
SGLmVGLGETNEEIIIEVMR  
SGLMVGLGETNEEIIIEVmR  
YVSPDEFDEMK  
YVVITSVDRDDL  
<QAQEILDTHYGLER  
ADVAmTGEITLR  
ADVAMTGEITLR  
AEYLESPTIDER  
AEYLESPTIDEREQEVLR  
DGPSAGIAMCTALVSCLTGNPVR  
DIHVHVPEGATPK  
DLEEIPDNVIADLDIHPVK  
DLEEIPDNVIADLDIHPVKR  
DVVVYPHmVIPLFVGR  
EASTDEPGVNDLFTVGTVASILQmLK  
EASTDEPGVNDLFTVGTVASILQMLK  
ELGE mDDAPDENEALKR  
ELGEMDDAPDENEALK  
ELGEMDDAPDENEALKR  
GELTVDDSAIIGIIR

GPILCLVGPPGVGK  
GQVLPIGGLK  
GYIDWMVQVPWNAR  
HIEINGDNLHDYLGVQR  
IEEVLTALQNEPSGmQVVTAK  
IEEVLTALQNEPSGMQVVTAK  
IEIPVLPLR  
IKGPILCLVGPPGVGK  
ILEYLAVQSR  
IPPEVLTSLNSIDDPAR  
ISALSDNGEHFSAK  
KGELTVDDSAIIGIIR  
KIPPEVLTSLNSIDDPAR  
LADKQSVLEmSDVNER  
LADTIAAHmPLK  
LADTIAAHMPLK  
LGINPDFYEK  
LGINPDFYEKR  
LSGYTEDEKLNIK  
LTYTGSLGEVmQESIQAALTVVR  
LTYTGSLGEVMQESIQAALTVVR  
mmSPmSAEATVVR  
mMSPMSAEATVVR  
MmSPMSAEATVVR  
MMSPmSAEATVVR  
MMSPMSAEATVVR  
NPLFLLDEIDK  
NPLFLLDEIDKmSSDmR  
NPLFLLDEIDKMSSDmR  
QAQEILDTDHYGLER  
RIEEVLTALQNEPSGmQVVTAK  
TAISQFEGYIK  
TVLIPFENK  
TVLIPFENKR  
VGQVTGLAWTEVGGDLLTIETACVPGK  
LAAALLPLLANK  
mQAEGCEAWYEmEELAVmGIVEVLGR



mAQILDTPQPAQNIAPSAVIDATAK  
MAQILDTPQPAQNIAPSAVIDATAK  
NPYLYAR  
TAALVMNIDDMSK  
VIIGDRVEIGACTTIDR  
GAPDVFEQFNTAVQK  
LLGETLLR  
TYVVmEEVK  
TYVVMEEVK  
VGLSPTPCLER  
<QLLDQLFTEHQVK  
AGVGISVVNPLTALDYAASGLVVR  
HDLGLTETLHTPAGTER  
LVTSLDAILSSATTA  
VLTPDDFQGENYISLSR  
AGLTLVVDLIK  
EFLENYLLTDEGLEAVNK  
FGGYAQSGLLAEITPDK  
FPQVAATGDGPDIIFWAHDR  
LIAYPIAVEALS LIYNK  
LYPFTWDAVR  
TWEEIPALDKELK  
VNYGVTVLPTFK  
VNQVAEVLQLAHLLDR  
ASLmSmTPTLNR  
ASLMSMTPTLNR  
ASVGAPPDILGPLGQNWGLPPmDPHIITAR  
AYEPFIELLR  
AYPEQSmAVAATHDLPTLR  
CmVIGEDLGTVPVEIVGK  
CMVIGEDLGTVPVEIVGK  
CYEPQALLNK  
DLAVGVAEGGAETWCDR  
GGFIGLNPIHALYPANPESASPSSSR  
GYWECGDLTLGK  
LDNAALAAGISPNYINAHGKPQSISAETK  
LPEGYHTLTLTQDDQR

LSATLESmFADDGVNK  
LWGACVQLYTLR  
NWXGIGDFGDLK  
QFVAEQGDSLFWQAAFDALHAQQVK  
RLDNAALAAGISPNYINAHGKPQSISAETK  
TLGLYPDEVVLR  
VAVTPVPPNVmVYTSVK  
VAVTPVPPNVMVYTSVK  
FGELPFLFK  
YIDIPELVANVK  
GSGPYFYLPK  
IQQQQDIDNGTLPDFISETASIR  
QAVTMDKPFLNAYSIR  
QILTAEAVEFLTELVTHFTPQR  
RVEITGPVER  
TEQATTTDELAFTRPYGEQEK  
VFMADFEDSLAPDWNK  
VFMADFEDSLAPDWNK  
VIASELGEER  
WDYIFSYIK  
FVEGGQLGIFR  
LNLVQSIITR  
LPPEANLMGFHYLEALDFQR  
TLIAYHKGDAATVESVDRmMSALNLPLSGIQSTLGR  
TLIAYHKGDAATVESVDRMmSALNLPLSGIQSTLGR  
TSELAQSLSSWPK  
ACIGIITNPVNTTVAIAAEVLKK  
DIALGEEFVNK  
FFSQPLLLGK  
GFSGEDATPALEGADVVLISAGVAR  
IKGFSGEDATPALEGADVVLISAGVAR  
IQNAGTEVVEAK  
LFGVTTLDIIR  
SDLFNVNAGIVK  
SNTFVAELK  
TQLPSGSELSLYDIAPVTPGVAVDLSHIPTAVK  
VAVLGAAGGIGQALALLK

EIWFLCR  
EMIQALADAR  
EMLQNSPMALR  
QALDmGLVNTVVPLADLEK  
QALDmGLVNTVVPLADLEKETVR  
QALDMGLVNTVVPLADLEK  
VGSFDGGWGASYmAR  
VGSFDGGWGASYMAR  
YDDNIGVIILTGAGDK  
FFINPTGR  
FVIGGPmGDCGLTGR  
IADQISDAVLDAILEQDPK  
IVGIDAVVLSTQHSEEIDQK  
VPSEQLTLLVR  
ASNQGEPVILDINADAGKAYADTVER  
ASNQGEPVILDINADAGK  
LVGVIPEDQSVLR  
MLSFEEIGTSTLQSR  
TAWENIIAPQLDAR  
TLIFAMPGSTK  
LADIASGQPLPVAGK  
EDIDAEQLATGDLSER  
LLIAPVLR  
LNELGASSINFVVR  
QILTNIIQSEDR  
HLVSPADALPGR  
SAIYPLTPEQDAAAR  
AWVEEHVGFVDSAVIDR  
FENPYLKDDVER  
IQIAEQSQLAPASVTK  
LIDQYGPISR  
mTPGGQAQIGNVDLVK  
NGNVGEIGHIQVEPLGER  
SAIGAFALVK  
TIAIAINLFPQK  
VLAEEHYPLPER  
VLLPAIESCINTQALK

LIAHVGCVSTAESQQLAASAK  
ALQSHLNSVSATWHAFGQTTNK  
DFLSHPGGIAHFEQLR  
LFFESSLVR  
YAAEHATDEQIDLLAK  
AADLVDALGQENNPWEK  
AWAALSEFTGR  
AYTPAWAEQITGVSR  
IVNLPGSEITQQR  
TPDAHFFTEVR  
TVAVTPDYAEIAK  
IADEAR  
QLLNEFPELK  
MTSISEVTDVYGVSR  
NGGIR  
DAGLK  
GEGQPGDIETLEQLCR  
LGTALAmAVDHEINmVSLVR  
FFQVYDPAYYDSK  
IPELAGIKDAAPDATFR  
GVCTLEDLAEQGIDDLADIEGLTDEK  
ESAPAAAAPAAQPALAAR  
QQASLEEQNNDALSPAIR  
SSVDILVPDLPESVADATVATWHK  
Ac-SERFPNDVDPIETR  
<QENVVYYITTLNENYHMPAMPEGAEEGIR  
<QENVVYYITTLNENYHMPAMPEGAEEGIRK  
<QEVHGNGLSSYPHPK  
<QIGIYSPNGQQYTPQDR  
<QIGIYSPNGQQYTPQDREQVAYYKEDEK  
<QPNFTEKLELPSLQDFGALLEEQSK  
<QTVYAFLGDGEMDEPESK  
AFLEGR  
ALNVmLK  
ALNVMLK  
AQYLIDQLLAEAR  
AQYLIDQLLAEARK

ARNEQDGGDLVYFQGHISPGVYAR  
ATVILAHTIK  
ATVILAHTIKGYGMGDAAEGK  
DGAYVR  
DGQDCER  
DLELGGHmASFQSSATIYDVCFNHFFR  
DLELGGHMASFQSSATIYDVCFNHFFR  
DRFNVPVSDADIEK  
DRFNVPVSDADIEKLPYITFPEGSEEHTYLHAQR  
DRLVPIIADEAR  
DWLQAIESVIR  
DWLQAIESVIREEGVER  
DYGVGSDVYSVTSFTELAR  
EAAEILAK  
EAAEILAKDYGVGSDVYSVTSFTELAR  
EHFFGKYPETAALVADWTDEQIWALNR  
EISTTIAFVR  
EKLDNLVFINCNLQR  
EQVAYYK  
EQVAYYKEDEK  
FNIDADK  
FNIDADKVNPR  
FNVPVSDADIEK  
FNVPVSDADIEKLPYITFPEGSEEHTYLHAQR  
FPNDVDPIETR  
FPNDVDPIETRDWLQAIESVIR  
GAIATIATR  
GFLIGGTSGR  
GGVNVAAGTGISNYINTIPVEEQPEYPGNLELER  
GGVNVAAGTGISNYINTIPVEEQPEYPGNLELERR  
GIYKLETIEGSK  
GKATVILAHTIK  
GKVQLLGSILR  
GYGmGDAAEGK  
GYGMGDAAEGK  
HFEVDASYVVVAALGELAK  
HFEVDASYVVVAALGELAKR

IGDLCWAAGDQQAR  
IINELEGIFEGAGWNVIK  
IYAAFK  
KDLELGGHMASFQSSATIYDVCFNHFFR  
KGGVNVAAGTGISNYINTIPVEEQPEYPGNLELER  
KGGVNVAAGTGISNYINTIPVEEQPEYPGNLELERR  
KGIYKLETIEGSK  
KIYAAFK  
KMNMDGVR  
KVVADAIK  
LDGPVTGNGK  
LDGPVTGNGKIINELEGIFEGAGWNVIK  
LDNLV FVINC NLQR  
LELPSLQDFGALLEEQSK  
LELPSLQDFGALLEEQSKEISTTIAFVR  
LETIEGSK  
LFAEQVR  
LHGYLPSR  
LIQLmNETVDGDYQTFK  
LIQLMNETVDGDYQTFK  
LmPEFWQFPTVSmGLGPIGAIYQAK  
LmPEFWQFPTVSMGLGPIGAIYQAK  
LMPEFWQFPTVSmGLGPIGAIYQAK  
LMPEFWQFPTVSMGLGPIGAIYQAK  
LPYITFPEGSEEHTYLHAQR  
LTQEQLDNFR  
LTQEQLDNFRQEVHGNGLSSYPHPK  
LVPIADEAR  
mNmDGVR  
MNMDGVR  
NEQDGGDLVYFQGHISPGVYAR  
NIAHQVK  
QENVYYYITTLENENYHmPAmPEGAEEGIR  
QENVYYYITTLENENYHmPAmPEGAEEGIRK  
QENVYYYITTLENENYHmPAMPEGAEEGIR  
QENVYYYITTLENENYHmPAMPEGAEEGIRK  
QENVYYYITTLENENYHMPAmPEGAEEGIR

QENVYYYITTLNENYHMPAmPEGAEEGIRK  
QENVYYYITTLNENYHMPAMPEGAEEGIR  
QENVYYYITTLNENYHMPAMPEGAEEGIRK  
QEVHGNGLSSYPHPK  
QIGIYSPNGQQYTPQDR  
QIGIYSPNGQQYTPQDREQVAYYK  
QKLHGYLPSR  
QPNFTEK  
QPNFTEKLELPSLQDFGALLEEQSK  
QPNFTEKLELPSLQDFGALLEEQSKEISTTIAFVR  
QTVYAFLGDGE mDEPESK  
QTVYAFLGDGEMDEPESK  
SAIRWNAIMTVLR  
SERFPNDVDPIETR  
TFG mEGLFR  
TFGMEGLFR  
TYVPADDYR  
VLGTDGFGR  
VPYIAQV mNDAPAVASTDY mK  
VPYIAQV mNDAPAVASTDYMK  
VPYIAQVMNDAPAVASTDY mK  
VPYIAQVMNDAPAVASTDYMK  
VQLLGSGSILR  
VVADAIK  
WDELLR  
WNAI mTVLR  
WNAIMTVLR  
WN m LHPLETPR  
WNMLHPLETPR  
YPETAALVADWTDEQIWALNR  
<QEAAPAAAPAPAAGVK  
AEAAPAATGGGIPG mLPWPK  
AEAAPAATGGGIPGMLPWPK  
AEAPAAAPAAK  
AEGKSEFAENDAYVHATPLIR  
AIEIKVPDIGADEVEITEILVK  
AVAAALEQ mPR

AVAAALEQMPR  
DVNVPDIGSDEVEVTEILVK  
EAAPAAAPAAAAAK  
EDVQAYVK  
EFGVNLAK  
ELMTISK  
EVNVPDIGGDEVEVTEV**m**VK  
EVNVPDIGGDEVEVTEVMVK  
FGEIEEVELGR  
FITIINNTLSDIR  
FITIINNTLSDIRR  
FNSSLSEDGQR  
ILREDVQAYVK  
ISGANLSR  
ITPVVFI**m**KAVAAALEQ**m**PR  
ITPVVFI**m**KAVAAALEQMPR  
ITPVVFI**m**K  
ITPVVFI**m**KAVAAALEQ**m**PR  
ITPVVFI**m**KAVAAALEQMPR  
ITPVVFI**m**K  
KEAAPAAAPAAAAAK  
KGIIELSR  
KYINIGVAVDTPNGLVVPVFK  
L**m**LPISLSFDHR  
LMLPISLSFDHR  
NWV**m**IPHVTHFDK  
NWV**m**IPHVTHFDKTDITELEAFR  
NWV**m**IPHVTHFDKTDITELEAFRK  
NWVMIPHVTHFDK  
NWVMIPHVTHFDKTDITELEAFR  
NWVMIPHVTHFDKTDITELEAFRK  
QEAAAPAPAAK  
QEAPAAAPAPAAGVK  
QQNEEAAK  
RAEAPAAATGGGIPG**m**LPWPK  
RAEAPAAATGGGIPGMLPWPK  
SA**m**EPVWNGK



SAmEPVWNGKEFVPR  
SAMEPVWNGK  
SAMEPVWNGKEFVPR  
SEFAENDAYVHATPLIR  
TDITELEAFR  
TDITELEAFRK  
TGSLImIFEVEGAAPAAAPAK  
TGSLImIFEVEGAAPAAAPAKQEAAAPAPAAK  
TGSLIMIFEVEGAAPAAAPAK  
TGSLIMIFEVEGAAPAAAPAKQEAAAPAPAAK  
TQTGALImIFDSADGAADAAPAQAEEK  
TQTGALImIFDSADGAADAAPAQAEEKK  
TQTGALIMIFDSADGAADAAPAQAEEK  
TQTGALIMIFDSADGAADAAPAQAEEKK  
TQTGALIMIFDSADGAADAAPAQAEEKKEAAPAAAPAA  
VIDGADGAR  
VNVGDKVK  
VNVGDKVSTGSLImVFEVAGEAGAAAPAAK  
VNVGDKVSTGSLIMVFEVAGEAGAAAPAAK  
VPDIGADEVEITEILVK  
VSTGSLImVFEVAGEAGAAAPAAK  
VSTGSLIMVFEVAGEAGAAAPAAK  
VSVGDKTQTGALImIFDSADGAADAAPAQAEEK  
VSVGDKTQTGALImIFDSADGAADAAPAQAEEKK  
VSVGDKTQTGALIMIFDSADGAADAAPAQAEEK  
VSVGDKTQTGALIMIFDSADGAADAAPAQAEEKK  
YINIGVAVDTPNGLVVPVFK  
YINIGVAVDTPNGLVVPVFKDVNK  
YINIGVAVDTPNGLVVPVFKDVNKK  
AALIDCLAPDR  
AQSVVDYLSK  
ATLKPEGQAALDQLYSQLSNLDPK  
DGSVVVLGYTDR  
FGQGEAAPVVAPAPAPAPEVQTK  
IGSDAYNQGLSER  
LGYPITDDLDIYTR  
RAQSVVDYLSK

SDVLFNFK  
FQDVGSFDYGR  
INLLDDNQFTR  
YDANNIYLAAQYTQTYNATR  
YVDVGATYYFNK  
KLPEDTPVTAQTSIGDNGEIVESTVR  
YADYQQIQFNHDK  
AEQQLDKDSAIVPVYYYVNAR  
LVKPWVGGYTGKDPLDNTYTR  
SVDPNTASPYASYLQYGHIAIDEILEGK  
TVINQVTYLPPIASEVTDVNR  
GKGTVSTESGVLNQQPYGFNTR  
SEVAVPGIDASTFDGIIQK  
KLLMKIFR  
AADSCHVSQPTLSGQIR  
DLEYLVALAEHR  
NMVAAGSGITLLPALAVPPER  
SRYEQLAEAIR  
EVAQAAIALIDQPK  
GEDGLAQLYVLPPQSTLTIHV GK  
INLNmIGLDGRPAVK  
KEDGAVVISALPHQVSGAR  
MLMFPVSDLPQLSK  
SNQPVVFDSTGR

SYAIDPITLPSAR  
VLEQIAAQMR  
YPLVDGQGNWGAPDDPK  
RRYEDDDYDDYDDYEDEEPmPR  
GVLTNLGAVAVDTGIFTGR  
LFIDNFDKYTDTPAGAALVAAGPK  
NTYASPEQWQEK  
AAYDLLALR  
AGYEAWLVG GVR  
DFDVTTNATPEQVR  
DIWQLQLR  
DNIFGSIEEDAQR

DNIFGSIEEDAQRR  
EESEAEQAVARPQVTVIPR  
GmLNELDEEPSR  
GMLNELDEEPSR  
IAQESGLTYHDAFALAmNDVLDEACR  
IAQESGLTYHDAFALAMNDVLDEACR  
ISPETAEPIPR  
LAHVmFGPEIIEVATFR  
LAHVMFGPEIIEVATFR  
LATLLNDIPPAR  
LLCEYHLFQPLFPTITR  
LLQAGYGYETYK  
WWGEFQVSAPPDQK  
YFTENGDSMER  
HLAFIEEILLDR  
LSDVIEQQLEFLILEGTLRPGEK  
GNIGYIGVPER  
MDKLLER  
AGAPFGPGANPMHGR  
ALIPFGGIK  
DAIPTQSVLTITSNVVYGK  
EmLLDAmENPEKYPQLTIR  
ITEQEAQEMVDHLVmK  
ITEQEAQEMVDHLMK  
IVGLQTEAPLKR  
LAQFTSLQADLENGVNLEQTIR  
LATAWEGFTK  
LPFAYAK  
RAGAPFGPGANPMHGR  
SEPIKGDVLNYDEVmER  
SGVLTGLPDAYGR  
THAPVDFDTAVASTITSHDAGYINK  
THNQGVFDVYTPDILR  
TmACGIAGLSVAADSLSAIK  
TmLYAINGGVDEK  
TMACGIAGLSVAADSLSAIK  
TMLYAINGGVDEK

TSTFLDVYIER  
VALYGIDYLMK  
VALYGIDYLMK  
VDDLAVDLVER  
ADEQILDIGDASAQELAEILK  
ALKEPARPMVAIVGGSK  
ALKEPARPMVAIVGGSK  
ASLPTIELALK  
DYLDGVDVAEGELVVLENVR  
FADVACAGPLLAELDALGK  
IADQLIVGGGIANTFIAAQGHVVGK  
ISYISTGGGAFLEFVEGK  
LLTTCNIPVPSDVR  
LTVLDSLSK  
SLYEADLVDEAK  
SLYEADLVDEAKR  
SVNDVKADEQILDIGDASAQELAEILK  
VATEFSETAPATLK  
VLPAVAMLEER  
VLPAVAMLEER  
YAALCDVFMVDAFGTAHR  
YAALCDVFMVDAFGTAHR  
AVITGDVTQIDLPR  
LLSLCGPFDDNIK  
TPNQAQYIANILDHDITFGVGPAGTGK  
VLEQSAESVPEYGK  
<QCNPALAALLDK  
<QFQEALSR  
<QHLLNLLHILALYK  
<QVDVLYR  
<QVEAPDDWHR  
AQPFAKPVANQR  
AYDINLTDLLEEEIDPALGNGGLGR  
DGRWEPEFTITGQAWDLPVVGYR  
DKVLDAVLKELESGK  
DLFPEYHQLWPNK  
EWANDLDQLINLEK

FHNVTNGITPR  
FNDGDFLR  
GYDPVKWR  
HmQIINEINTR  
HMQIINEINTR  
HNEALDVQVGIGGK  
HVNYISMEFLIGR  
LAACFLDSMATVGQSATGYGLNYQYGLFR  
LIPAADISEQISTAGK  
LmQQYFQCACSVADILR  
LMQQYFQCACSVADILR  
LTGNNLLNLGWYQDVQDSLK  
LWQATHAHPFDLTK  
NIIFAINK  
QCNPALAALLDK  
QFQEALSR  
QGGDPYLVmADFAAYVEAQK  
QGGDPYLVmADFAAYVEAQK  
QVEAPDDWHR  
SNYPWFR  
TFAYTNHTLmPEALER  
TFAYTNHTLMPEALER  
TGIEINPQAIFDIQIK  
VADVINDPLVGDK  
VADVINDPLVGDKLK  
VFLFGAK  
VGEENIFIFGHTVEQVK  
VLDAVLKELESGK  
VLIDEHQmSWDDAWAITSK  
VLIDEHQMSWDDAWAITSK  
VVFLPDYCVSAAEK  
WEPEFTITGQAWDLPVVGYP  
YGLNSAAEmTPR  
YGLNSAAEMTPR  
YSDGDKHAFDQmLHSIGK  
YSDGDKHAFDQMLHSIGK  
ILEEAVSTALELASGK

AAVAGIAMGLVK  
AAVAGIAMGLVK  
AKPGQDFFPLTVNYQER  
ALTEETGTTIEIEDDGTVK  
DAQVLDELmGER  
DAQVLDELMGER  
DGISALQmDIK  
EIMQVALNQAK  
GETQALVTATLGTAR  
GVLAVmPDMDKFPYTVR  
IEEITAEIEVGR  
IPGSFFR  
IVDFGAFVAIGGGK  
LHILGVmEQAINAPR  
LHILGVMEQAINAPR  
VGYINDQYVLNPTQDELKESK  
VTDYLQmGQEVVPVK  
VTDYLQMGQEVVPVK  
WDWQPEPVNEALNAR  
VINGFmIQGGGFEPGmK  
ADQefdGLYNELLEMAR  
AQLAIYDYIK  
DAEYDLVHEMEASLMELMSSSLK  
DMPNALVEVLR  
DVLLYYPYHTFEHVLELLR  
EIANAQQGLPSGITLK  
ELSWLSFNER  
FDEEANIHWAK  
FLGIYSNNLDEFYK  
FVNLPEAPR  
GFFDYDALNAYSmK  
GFFDYDALNAYSМК  
GMCSLIPNLEGISDNIR  
IEVATPLLDPR  
LLYEMVDR  
LYAASSSGVPVNLLVR  
LYTDYSLLTADAR

NQIFLINER  
QASFDPSVLAIK  
QHITPILINPDTDLVQFLK  
QLSVNQQNWLR  
VFNFIENPYRPVTFDYLmVSPQNSR  
VFNFIENPYRPVTFDYLMVSPQNSR  
VLDIIDILFSDTVK  
VLKADQEFDGLYNELLEmAR  
VLKADQEFDGLYNELLEMAR  
VYLSSADWmTR  
VYLSSADWMTR  
YALLEIPSDKVPR  
YCLDDIFK  
ATTLQACLDEAGDNLAALR  
TALLEKLEGQLATLR  
AGQNAmDATVLEITK  
AGQNAMDATVLEITK  
EEQHTPVSDISALTVGQALK  
EVIAFLAER  
FPHCFSAEGEAR  
FPHCFSAEGEARPLK  
IGIFQDLVDR  
LYTSSWR  
VAGEMNLSK  
VDLDGNPCGELDEQHVEHAR  
VQLNSGmSLIVR  
VQLNSGMSLIVR  
YLYGVKPGATR  
DAAYHFQGDADNDQLSVTPLVGLGK  
DLQSIADYPVK  
EALGVLHFK  
GFIIDDSVLYSGASLNDVYLHQHDK  
GILNALYEAK  
ICIVALYLEQDDGGK  
IGAAASNTNADWYCR  
IIGALPYLYEINLR  
ISQSVDDVDFFYAPADFR

ISQSVDDVDFFYAPADFRETLEK  
LDLENAILIHDPQLELAPQR  
LQYYVNTDQLVVR  
LTICTPYFNLPAILVR  
LWKDDDNTYHLK  
mAQENPGVDVPVYGVPINTR  
MAQENPGVDVPVYGVPINTR  
NIIQLLR  
TANDFYIPEDEPFK  
TIFHLMPCAEQK  
SLELPAIVGTGSVTSQVK  
ATVFIFPDLNTGNTTYK  
LSGSVTVGETPVIR  
VGDTVIEFDLPLLEEK  
mFQQEVTITAPNGLHTR  
DDDPSFDELVALAVETGR  
GVLFLVDTWGGSPFNAASR  
IIVVSDEVAADTVR  
ITSVNVGGMAFR  
TLLTQVAPPGVTAHVVDVAK  
TQVNNAVSVDEKDIEAFK  
TQVNNAVSVDEKDIEAFKK  
VmLLFTNPTDVER  
VMLLFTNPTDVER  
mRAQAEK  
AVQLNSLSGFCLTK  
ENVTSIINGVVLSPAALmK  
ENVTSIINGVVLSPAALMK  
EVTTTPLAADDWK  
IVDLLTER  
LDVLDGLK  
LLLSEACPLILDYHVALDNAR  
RIEELTGVPIDIISTGPDR  
SGLPQAALNYIK  
TGWLDTVAVR  
TVLHLIPSGILR  
VGAGPFPTLFDLDETFEFLCK



VGDLFDKETFAEK  
YVDYVLGILK  
AALTQPLNALR  
AGGPLYLYR  
IADTSLPLDELVADPVTAVEK  
LASLSSALLNSALQK  
LLANRPESALAVTLAR  
LTTDIGPVIDSEAK  
TFSNAIAEVR  
AAILPAAISFEQAAASFLK  
AIGINFIDTYIR  
LPLPTQYQTAIK  
ALQEASGFIR  
EIALILQR  
IVPELTFFYDNSLVEGmR  
IVPELTFFYDNSLVEGMR  
LGmMTTVSGVEmSR  
LGmMTTVSGVEMSR  
LGMmTTVSGVEmSR  
LGMmTTVSGVEMSR  
LGMMTTVSGVEmSR  
LGMMTTVSGVEMSR  
MSNLVTSVVK  
MSNLVTSVVKHDEER  
RVNPDDSKED  
VAQEMQKEIALILQR  
VYVTFLNKDEDAVK  
LFAEGFLVTEIAK  
AEIEGEIGDSHMGLAAR  
ALAAALGQIEK  
IGVMFGNPETTTGGNALK  
IVEIYGPESSGK  
QSNTLLIFINQIR  
SGAVDVIVVDSVAALTPK  
TCAFIDAEHALDPIYAR  
TTLTLQVIAAAQR  
TEIIIESEGEVAGIK

DSVIPAPEEGETATFIYVGR  
GVAESTINVIFNPVETK  
IAFIGEAVSGFGGMETVIR  
IPASIDEFYQSK  
LHVLDGSDFEK  
VKDLLDGLSQAK  
AAATGEALSLVCVDEHK  
AVAEQGYREPTPIQQQAIPAVLEGR  
GGVDVLVATPGR  
GLDIEELPHVVNYELPNVPEDYVHR  
GNWQQVLVFTTR  
IAIPGYEPDPSIKAETPIQNGR  
IAIPGYEPDPSIK  
LDQVEILVLDEADR  
LLHNPLEIEVAR  
NTASDQVTQHVHFVVK  
QNLLFSATFSDDIK  
SFDSLGLSPDILR  
TAGFTLPLLQHLITR  
VLVATDIAAR  
DVIILLDSITR  
ILFENLTPLHANSR  
KQDIIFAILK  
NTPVSELITLGENmGLENLAR  
NTPVSELITLGENMGLENLAR  
QDIIFAILK  
VLDLASPIGR  
AGQWQQVQLESWK  
DLmGCQVVTTEGYDLGK  
DLMGCQVVTTEGYDLGK  
LVPFLDGQVIK  
LVPFLDGQVIKK  
QLTAQAPVDPIVLGK  
SIEVDWDPGF  
SKQLTAQAPVDPIVLGK  
VFSSTEDAESIFDYQPWFIQK  
VVDmmETGSNDVLVIK

VVDmMETGSNDVLVIK  
VVDMmETGSNDVLVIK  
VVDMMETGSNDVLVIK  
ANLVPFH  
AVDGEmitVTVEGKDEVFALSNIQK  
AVDGEMITVTVEGK  
AVDGEMITVTVEGKDEVFALSNIQK  
DEVFALSNIQK  
FVGEEVTLVLR  
<QYDINEAIALLK  
AAGAELVGmedLADQIK  
AAGAELVGMEDLADQIK  
FVESVDVAVNLGIDAR  
KVSISTTMGAGVAVDQAGLSASVN  
QYDINEAIALLK  
VAVFTQGANAEEAK  
VGTVTPNVAEAVK  
VVGQLGQVLGPR  
<QAIVAEVSEVAK  
AAAFEGELIPASQIDR  
ALNLQDKQAIVAEVSEVAK  
AVEGTPFECLK  
DAFVGPTLIAYSmeHPGAAAR  
DAFVGPTLIAYSMEHPGAAAR  
GALSAVVADSR  
LATLPTYEEAIAR  
QAIVAEVSEVAK  
RAVEGTPFECLK  
AADmTGADIEAmTR  
AADMTGADIEAMTR  
AQLQEIAQTK  
GLPIPVVITVYADR  
SFTFVTK  
SMGLVVED  
TPPAVLLK  
AEYTPHVDTGDYIIVLNADK  
DWYVVDATGK

QATFEEMIAR  
RDWYVV DATGK  
VYAGNEHNHAAQQPQVLDI  
FDGNACVLLNNNSEQPIGTR  
IISLAPEVL  
KGDVLK  
mIQEQTMLNVADNSGAR  
MIQEQTMLNVADNSGAR  
AAIEAAGGKIEE  
AANIIGIQIEFAK  
GFEGGQmPLYR  
GFEGGQMPLYR  
VEGGVVDLNTLK  
VILAGEVTTPVTVR  
GKGNVEYWVALIQPGK  
GLAQGTDVSFGSFGLK  
GNVEYWVALIQPGK  
VLYEmDGVPEELAR  
VLYEMDGVPEELAR  
AGDNAPmAYIELVDR  
AGDNAPMAYIELVDR  
LFNELGPR  
RVVEPLITLAK  
VVEPLITLAK  
LQAFEGVVIAIR  
QDVPSFRPGDTVEVK  
VFQTHSPVVDSISVK  
AGDQIQSGVDAAIKPGNTLPmR  
AGDQIQSGVDAAIKPGNTLPMR  
ATLGEVGNAEHmLR  
ATLGEVGNAEHMLR  
DGAYVTLR  
GKPFAPLLEK  
HPVTPWGVQTK  
NFGKHPVTPWGVQTK  
NKDGIPAVVER  
SAGTYVQIVAR

SANIALVLYK  
SANIALVLYKDGER  
TDKFIVR  
YILAPK  
ILADIAVFDK  
ILADIAVFDKVAFTALVEK  
VAFQAVIK  
VAFTALVEK  
IGVPFVDGGVIK  
QWFTDVK  
IFVDEGPSMK  
KVLESAIANAEHNDGADIDDLKVTK  
VLESAIANAEHNDGADIDDLK  
VLESAIANAEHNDGADIDDLKVTK  
VSQALDILTYTNK  
VSQALDILTYTNKK  
EAAIQVSNVAIFNAATGK  
HQPVPALNQPGGIVEK  
IRRDEVIVLTGK  
VIVEGINLVK  
VIVEGINLVKK  
AANKFPaiiYGGK  
AEFYSEVLTIVVDGK  
MFTINAEVR  
GAVPGATGSDLIVKPAVK  
IFTEDGVSIPVTVIEVEANR  
VTVQSLDVVR  
ATLLGLGLR  
GmINAVSFmVK  
GmINAVSFMVK  
GMINAVSFmVK  
GMINAVSFMVK  
IKLVSSAGTGHFYTTTK  
LVSSAGTGHFYTTTK  
DAQSALTVSETTFGR  
DATGIDPVSLIAFDK  
DATGIDPVSLIAFDKVVmTADAVK

DATGIDPVSLIAFDKVVMTADAVK  
DFNEALVHQVVVAYAAGAR  
SILSELVR  
ALLAAFDFPFR  
ALLAAFDFPFRK  
EQIIFPEIDYDKVDR  
GLDITITTTAK  
ITLNMGVGEAIADKK  
LITIAVPR  
LLDNAAADLAAISGQK  
LLDNAAADLAAISGQKPLITK  
LMTEFNYSVMQVPR  
mWEFFER  
MWEFFER  
ALLNSmVIGVTEGFTK  
ALLNSMVIGVTEGFTK  
ALLNSMVIGVTEGFTKK  
APVVVPAGVDVK  
DGYADGWAQAGTAR  
GADKQVIGQVAADLR  
HADNTLTFGPR  
KLQLVGVGYR  
LQLVGVGYR  
QVIGQVAADLR  
TLNDAVEVK  
ALEEAGAEVEVK  
DLVESAPAALK  
DQIIEAVAAmSVmDVVELISAmEEK  
FGVSAAA AVAVAAGPVEAAEEK  
TEFDVILK  
DIADAVTAAGVEVAK  
INALETVTIASK  
KNIEFFEAR  
LAEVLAAANAR  
LFGSIGTR  
mQVILLDK  
MQVILLDK

NIEFFEAR  
TTGEHEVSFQVHSEVFAK  
VANLGS LGDQVNVK  
VIVNVVAE  
<QAADHPVIATYPEPEGLYLK  
AALISALQTLYPECSIYDR  
AEFVRDDVFK  
ASLGETIDIVDHQ GK  
DVQFIEQFR  
EGmELTQGPVTGELPPALLPIEEHGmK  
EGmELTQGPVTGELPPALLPIEEHGmK  
EGMELTQGPVTGELPPALLPIEEHGmK  
EGMELTQGPVTGELPPALLPIEEHGmK  
FDVIVmDPPK  
FDVIVmDPPKFVENK  
FDVIVMDPPK  
FGNFLVLQLLSAGAEYQR  
HPWVFSGAVAR  
IIADAAIDAGR  
LIAGESDGLPGITIDR  
QAADHPVIATYPEPEGLYLK  
RHPWVFSGAVAR  
TGYLDQR  
WRDWLAQK  
LAGIGELITFEVK  
LDSEPALIALHSLGR  
NYHVAESTPDSKPA mVAEDYTNR  
ELVELPPETSSK  
FSGGEGINQWYNVTLTEGR  
GGWTELDLAQTNYLR  
GVQLEDGPAAFK  
IRIDGHLISVR  
LWEAVGVQVSR  
VLAYYKPEGELCTR  
DYLALVR  
IVAITADEAGQR  
LDRDTSGVLLVAK

VAEREEAVSPHLQK  
VHTQYAGHPHAFDDR  
YAFATLVR  
EMCPYQTLNQR  
SKE<sup>m</sup>CPYQTLNQR  
SKEMCPYQTLNQR  
SQWLGGWR  
AFTNYLPGFNIP<sup>m</sup>LPR  
AFTNYLPGFNIPMLPR  
AVIKGETATRPQDEITVQ<sup>m</sup>AER  
DVGDWLYAR  
ELSDDLCSLR  
ESAEPEELVEPFLTR  
FAAEIVDISR  
GETATRPQDEITVQMAER  
GEVLDIVAEP  
GFGLEVDAQK  
LVDNGAIAFIPAPFLHAVR  
VTDVIDVTIAEVR  
AAPATPAAPAQPGLLSR  
APAPEYVPEAPR  
QDIGEILIDNPK  
YPIVRPQDVQVEEQR  
<QPIFDLFDVENEIQR  
ESIEHVLCNECPTCHGR  
LTTDITLPSR  
NLDDTIFNTNIEATQAIAR  
QPIFDLFDVENEIQR  
TAAEGVGEAELASDAAYLK  
TAAEGVGEAELASDAAYLKR  
TAELLVNVTSETR  
TSVNGFSALGLVE<sup>m</sup>TR  
TSVNGFSALGLVEMTR  
TVETVCYE<sup>m</sup>R  
VAYIDGGILQEIHIER  
VLPG<sup>m</sup>QAAFVDIGLDK  
VVAEYCDEQGGFIIR



YQLYGELALAQR  
<QYGDFFDRYVLALSWQTGFCQSQHDR  
ADAINAPLSANSFLPQPHPGNCGK  
ADFLTVHGLWPLPK  
FGCATRPIPNLPEAR  
FLADNYGK  
HGACFGFDPDAYFGTMVR  
LSEV<sup>m</sup>PGAGGR  
LSEVMPGAGGR  
LTCQGNPAYLTEIQISIK  
<sup>m</sup>CSSPETGLSLETAAK  
MCSSPETGLSLETAAK  
RDFDAFAK  
YVLALSWQTGFCQSQHDR  
<QCYALPERLDLVK  
ADEATRDVADWLK  
CDF<sup>m</sup>LDQVGNVFK  
CDFMLDQVGNVFK  
DELAVELHIEGEEQLEGLR  
DELAVELHIEGEEQLEGLRR  
DFDDAVYCEK  
DGQLVFTR  
DGYGFLR  
DLPLVTIDGEDAR  
DLPLVTIDGEDARDFDDAVYCEK  
DVADWLK  
DYAELLESVADRPDAE<sup>m</sup>LQT<sup>m</sup>LLR  
DYAELLESVADRPDAE<sup>m</sup>LQTMLLR  
DYAELLESVADRPDAE<sup>m</sup>LQT<sup>m</sup>LLR  
DYAELLESVADRPDAE<sup>m</sup>LQTMLLR  
EFILEHLTK  
EQGHQGNNTTETGGYHYS<sup>m</sup>EE<sup>m</sup>LQLGQHCS<sup>m</sup>AER  
EQGHQGNNTTETGGYHYS<sup>m</sup>EE<sup>m</sup>LQLGQHCS<sup>m</sup>AER  
FDQVGQR  
FIFNAER  
FYEAV<sup>m</sup>SSHAR  
FYEAVMSSHAR

GGISFESEEAK  
GHFGLALQSYAHFTSPIR  
GVISSVTGFGFFVR  
HLEELHNLYK  
IDFSLISSER  
IHDKPSTEAITFR  
IVEVLGDNmGTGmAVDIALR  
IVEVLGDNmGTGMAVDIALR  
IVEVLGDNMGTGmAVDIALR  
IVEVLGDNMGTGMAVDIALR  
KDDLKLSSEQmK  
KDDLKLSSEQMK  
KIDFSLISSER  
KVNFEPSAFR  
KVNFEPSAFRGEK  
LCmVCEmTVSSK  
LCmVCEMTVSSK  
LCMVCEmTVSSK  
LCMVCEMTVSSK  
LDDLFDGLVHVSSLDNDYYR  
LIEECmILANISAAR  
LIEECMILANISAAR  
LmGESSGQTYR  
LMGESSGQTYR  
LSFDILIPPDQImGAR  
LSFDILIPPDQIMGAR  
LWVAIADVSYYVR  
LWVAIADVSYYVRPSTPLDR  
mGFVVVELTQRPTR  
MGFVVVELTQRPTR  
QAIYDPENR  
QCYALPERLDLVK  
RQCYALPERLDLVK  
SQDPFQER  
SVLAELGLELPGGNKPEPR  
TCIHGDQVLAQPLGADR  
TCIHGDQVLAQPLGADR

THEIPYIWPQAVEQQVAGLK  
THEIPYIWPQAVEQQVAGLKEEVPEEAK  
VEAVNMDER  
VNFEPDSAFR  
VNFEPDSAFRGEK  
VWHILQGDQDLR  
VWHILQGDQDLREQYAPLVK  
YANPIPSR  
YFTEAGVGFVVPDDSR  
YPDTLHR  
PILDIALQYR  
QFAQTPALYR  
SPEWSAFGIRPPLR  
AATILAEQLEAFVDLR  
AEAIHYIGDLVQR  
EEKPEFDPILLRPVDDLELTVR  
EGVQEDILEILLNLK  
IAYNVEAAR  
ILLSSmPGCAVTEVEIDGVLHEYSTK  
ILLSSMPGCAVTEVEIDGVLHEYSTK  
LLVDACYSPVER  
mQGSVTEFLKPR  
MQGSVTEFLKPR  
RAATILAEQLEAFVDLR  
SLTEIKDVLASR  
TDLDKLVIEmETNGTIDPEEAIR  
VQKDEVILTlnk  
VTLEPLER  
ALEIEEmQLK  
ALEIEEMQLK  
AVAVDSGVTAVAK  
AVLVAGGVEAEKLDK  
EFFGSSQLSQFmDQNNPLSEITHK  
FIEQDPEGQYGLEAAFR  
FTTIHIQELACVSR  
GDVLADGPSTDLGELALGQNmR  
GDVLADGPSTDLGELALGQNMR

GGVVQYVDASRIVIKVNEDEmYPGEAGIDIYNLTK  
GmPIATPVFDGAK  
GMPIATPVFDGAK  
GSWLDFEFDPK  
IETLFTNDLDHGPYISETLR  
INPIEDmPYDENGTPVDIVLNPLGVPSR  
ISALGPGGLTR  
ITQGDDLAPGVLK  
KLPATIILR  
LDESGIVYIGAEVTGGDILVGK  
LGDLPSTSGQIR  
LGEPVFDVQECQIR  
LGPEEITADIPNVGEAALSK  
LIEVPVEYIAGK  
LPATIILR  
LQMELVPER  
LRGETASFDIEANGK  
LSALVEIYR  
LSLGDLDLmPQDmINAKPISAAVK  
MNIGQILETHLGmAAK  
QKVDLSTFSDEEVmR  
QKVDLSTFSDEEVMR  
SNQNTCINQmPCVSLGEPVER  
SPGVFFDSDK  
SPGVFFDSDKGK  
STGSYSLVTQQPLGGK  
SVFPIQSYSGNSELQYVSYR  
SVGEMAENQFR  
TGEQFERPVTVGYmYmLK  
VDLSTFSDEEVMR  
VNEDEMYPGEAGIDIYNLTK  
VPNGVSGTVIDVQVFTR  
<QTDELTLGLSSLVVLDSAER  
AILWmIVPK  
AILWMIVPK  
AIVQLEDGVQISSGDTLAR  
AmmDNLQTETVINR

AmMDNLQTETVINR  
AMmDNLQTETVINR  
AMmDNLQTETVINRDGQEEK  
AMMDNLQTETVINR  
ASLATESFISAASFQETTR  
ATIVNAGSSDFLEGEQVEYSR  
DLLGITK  
EGLNVLQYFISTHGAR  
EPILAEISGIVSFGK  
ESYKVPYGAVLAK  
FATSDLNDLYR  
FTDmIDGQTITR  
FTDMIDGQTITR  
GDVISDGPEAPHDILR  
GEAIGVIAAQSIGEPGTQLTMR  
GLmAKPDGSIETPITANFR  
GLMAKPDGSIETPITANFR  
GLPYSIVNQALGK  
IALASPDmIR  
IALASPD MIR  
IFGPVKDYECLCGK  
IGLLLDmPLRDIER  
IGLLLDMPLR  
IGLLLDMPLRDIER  
IVDAQGNDVLI PGTDmPAQYFLPGK  
IVDAQGNDVLI PGTDMPAQYFLPGK  
KATIVNAGSSDFLEGEQVEYSR  
LGIQAFEPVLI EGK  
LIPAGTGYAYHQDR  
LLDLAAPDIIVR  
LVITPVDGSDPYEEmIPK  
LVITPVDGSDPYEEMIPK  
mGAEAIQALLK  
mLQEAVDALLDNGR  
mLQEAVDALLDNGRR  
MALELFKPFYIGK  
MGAEAIQALLK

MLQEAVDALLDNGR  
MLQEAVDALLDNGRR  
NTLLHEQWCDLLEENSVDVAVK  
PDGSIIETPITANFR  
PGTADILVPR  
QLNVFEGER  
QTDELTLGLSSLVVLDSAER  
QVSFNSIYmmADSGAR  
QVSFNSIYMmADSGAR  
QVSFNSIYMMADSGAR  
RLVITPVDGSDPYEEMIPK  
SGASVGIDDMVIPEK  
SGASVGIDDMVIPEK  
SGASVGIDDMVIPEKK  
SmDLEQECEQLREELNETNSETK  
SVITVGPYLR  
SVVSCDTDFGVCAHCYGR  
SWSFGEVK  
VADLFEAR  
VIDIWAAANDR  
VTAEDVLKPGTADILVPR  
YIVNEVQDVYR  
VPLPPLTEER  
Ac-MTESFAQLFEESLK  
Ac-MTESFAQLFEESLKEIETRPGSIVR  
Ac-TEsFAQLFEESLK  
Ac-TEsFAQLFEESLKEIETRPGSIVR  
<QLAEDPFNNWVALNK  
<QLAEDPFNNWVALNKK  
<QLGEDPWVAIAK  
AFLPGSLVDVR  
AFLPGSLVDVRPVR  
AFLPGSLVDVRPVRDTLHLEGK  
AKDEADEKDAIATVVK  
ANPWQQFAETHNK  
ANPWQQFAETHNKGDR  
ANPWQQFAETHNKGDRVEGK

AVIESENSAER  
AVIESENSAERDQLLENLQEGmEVK  
AVIESENSAERDQLLENLQEGMEVK  
AYEDAETVTGVINGK  
DAIATV NKQEDANFSNNAmAEAFK  
DAIATV NKQEDANFSNNAMAEAFK  
DQLLENLQEGmEVK  
DQLLENLQEGMEVK  
DRVEDATLVLSVGDEVEAK  
DTLHLEGK  
DTLHLEGKELEFK  
DVVLVDAGLK  
EIETRPGSIVR  
ELEFK  
EYKKGDEIAAVVLQVDAER  
FTGVDR  
FTGVDRK  
GAIVTGK  
GATVELADGVEGYLR  
GDEIAAVVLQVDAER  
GDEIAAVVLQVDAERER  
GGFTVELNGIR  
GVVVAIDK  
GVVVAIDKDVVLVDAGLK  
GVVVAIDKDVVLVDAGLKSESAIPAEQFK  
HEAWITLEK  
HPSEIVNVGDEITVK  
ISLGLK  
ISLGVKQLAEDPFNNWVALNK  
KGDEIAAVVLQVDAER  
KGDEIAAVVLQVDAERER  
mTESFAQLFEESLK  
mTESFAQLFEESLKEIETR  
mTESFAQLFEESLKEIETRPGSIVR  
MTESFAQLFEESLK  
MTESFAQLFEESLKEIETR  
MTESFAQLFEESLKEIETRPGSIVR

NAQGELEIQVGDEVDVALDAVEDGFGETLLSR  
NLTDYGAFVDLGGVDGLLHITDmAWK  
NLTDYGAFVDLGGVDGLLHITDmAWKR  
NLTDYGAFVDLGGVDGLLHITDMAWK  
NNVVSR  
QEDANFSNNAmAEAFK  
QEDANFSNNAMAEAFK  
QLAEDPFNNWVALNK  
QLAEDPFNNWVALNKK  
QLGEDPWVIAIAK  
RAVIESENSAER  
RAVIESENSAERDQLLENLQEGmEVK  
RAVIESENSAERDQLLENLQEGMEVK  
RHEAWITLEK  
RNNVVSR  
RYPEGTK  
SESAIPAEQFK  
SITDFGIFIGLDGGIDGLVHLSDISWNVAGEEAVR  
TESFAQLFEESLK  
TESFAQLFEESLKEIETR  
TESFAQLFEESLKEIETRPGSIVR  
TRVSLGLK  
VEDATLVLSVGDEVEAK  
VIKLDQK  
VKGFTVELNGIR  
VKHPSEIVNVGDEITVK  
VSLGLKQLGEDPWVIAIAK  
VTAVDAK  
VTAVDAKGATVELADGVEGYLR  
VTNLTDYGCFVEIEEGVEGLVHVSEmDWTNK  
VTNLTDYGCFVEIEEGVEGLVHVSEMDWTNK  
VVNVGDVVEVmVLDIDEER  
VVNVGDVVEVmVLDIDEERR  
VVNVGDVVEVmVLDIDEERRR  
VVNVGDVVEVMVLDIDEER  
VVNVGDVVEVMVLDIDEERR  
VVNVGDVVEVMVLDIDEERRR



DQYEIR  
ERFTVLISPHVNK  
FTVLISPHVNK  
FTVLISPHVNKDAR  
GPIPLPTR  
GPIPLPTRK  
LIDQATAEIVETAK  
LIDQATAEIVETAKR  
LKAFDHR  
LVDIVEPTEK  
LVDIVEPTEKTVDALmR  
LVDIVEPTEKTVDALMR  
TVDALmR  
TVDALMR  
<QGNALGWATAGGSGFR  
<QVSDGVVAHIHASFNNITIVTITDR  
ALNAAGFR  
CADAVKEYGIK  
KQVSDGVVAHIHASFNNITIVTITDR  
KSTPFAAQVAAER  
NLEVmVK  
NLEVMVK  
QGNALGWATAGGSGFR  
QVSDGVVAHIHASFNNITIVTITDR  
STPFAAQVAAER  
ATVNQLVR  
GALDCSGVK  
GALDCSGVKDR  
LTNGFEVTSYIGGEGHNLQEHSVILIR  
SNVPALEACPQK  
SNVPALEACPQKR  
VKD\*LPGVR  
VKDLPGVR  
VRLTNGFEVTSYIGGEGHNLQEHSVILIR  
AILAAAGIAEDVK  
AILAAAGIAEDVKISELSEGQIDTLR  
AILAAAGIAEDVKISELSEGQIDTLRDEVAK

EISmSIK  
EISmSIKR  
EISMSIK  
EISMSIKR  
FVVEGDLR  
FVVEGDLRR  
HAVIALTSIYGVGK  
HAVIALTSIYGVGKTR  
IAGINIPDHK  
IAGINIPDHKHAVIALTSIYGVGK  
ISELSEGQIDTLR  
ISELSEGQIDTLRDEVAK  
ISELSEGQIDTLRDEVAKFVVEGDLR  
LmDLGCYR  
LMDLGCYR  
REISMSIK  
RLmDLGCYR  
RLMDLGCYR  
SKAILAAAGIAEDVK  
SKAILAAAGIAEDVKISELSEGQIDTLR  
<QTGRPHGFLR  
AELKAIISDVNASDEDRWNAVLK  
AIISDVNASDEDR  
AIISDVNASDEDRWNAVLK  
GEIPGLKK  
RVALADKYFAK  
VALADKYFAK  
Ac-SLSTEATAKIVSEFGR  
DANDTGSTEVQVALLTAQINHLQGHFAEHK  
DANDTGSTEVQVALLTAQINHLQGHFAEHKK  
IVSEFGR  
KLLDYLK  
KLLDYLKR  
LLDYLK  
LLDYLKR  
SLSTEATAK  
SLSTEATAKIVSEFGR

YTQLIER  
EEGTRLDLDR  
IAHWVGQGATISDR  
IAHWVGQGATISDRVAALIK  
KRPFYQVVVADSR  
PFYQVVVADSR  
RPFYQVVVADSR  
VAALIK  
VAALIKEVNK  
VGFFNPIASEK  
VGFFNPIASEKEEGTR  
VGFFNPIASEKEEGTRLDLDR  
FVKHPIYGK  
HPIYGK  
LHVHDENNECGIGDVVEIR  
SIVVAIER  
SWTLVR  
TKSWTLVR  
TTKLHVHDENNECGIGDVVEIR  
VVSDK  
VVSDKmEK  
VVSDKMEKSIVVAIER  
ARYLSLLPYTDR  
DIATLK  
FTAEGVQEIDYK  
FTAEGVQEIDYKDIATLK  
FTAEGVQEIDYKDIATLKNYITESGK  
IVPSR  
NYITESGK  
NYITESGKIVPSR  
YLSLLPYTDR  
YLSLLPYTDRHQ  
<QHVPVFVTDEMVGHK  
AVESGDKKPLR  
GPFIDLHLLK  
GPFIDLHLLKK  
KGPFDLHLLK

KGPFIDLHLLKK  
LGEFAPTR  
QHVPVFVTDEmVGHK  
QHVPVFVTDEMVGHK  
RSTIFPNmIGLTIAVHNGR  
RSTIFPNMIGLTIAVHNGR  
RSTIFPNMIGLTIAVHNGRQHVPVFVTDEmVGHK  
RSTIFPNMIGLTIAVHNGRQHVPVFVTDEMVGHK  
STIFPNmIGLTIAVHNGR  
STIFPNMIGLTIAVHNGR  
AASEAVKDAALSCDQFFVNHR  
AGVHFGHQTR  
AVTLYLGAVAATVR  
AVTLYLGAVAATVREGR  
DAALSCDQFFVNHR  
DLETQSQDGTDFK  
DLETQSQDGTDFKLT  
DLETQSQDGTDFKLT  
DmGGLPDALFVIDADHEHIAIK  
DMGGLPDALFVIDADHEHIAIK  
EALMR  
EANNLGIPVFAIVDTNSDPDGVDFVIPGNDDAIR  
ELEKLENSLGGIK  
ELEKLENSLGGIKDmGGLPDALFVIDADHEHIAIK  
ELEKLENSLGGIKDMGGLPDALFVIDADHEHIAIK  
ILFVGTK  
ILFVGTKR  
LENSLGGIK  
LENSLGGIKDmGGLPDALFVIDADHEHIAIK  
LENSLGGIKDMGGLPDALFVIDADHEHIAIK  
LKDLETQSQDGTDFK  
LKDLETQSQDGTDFKLT  
mKPFIFGAR  
MKPFIFGAR  
NKVHIINLEK  
PFIFGAR  
RAASEAVK

RAASEAVKDAALSCDQFFVNHR  
RLKDLETQSQDGTFDK  
SQDLASQAEESFVEAE  
TRELEKLENSLGGIK  
TVPmFNEALAELENK  
TVPMFNEALAELENK  
TVPMFNEALAELENKIASR  
VHIINLEK  
WLGGmLTNWK  
WLGGMLTNWK  
YWNPk  
AFNEmQPIVDR  
AFNEMQPIVDR  
ANLTAQINK  
HKANLTAQINK  
KVYAAIEAGDKAAAQK  
KVYAAIEAGDK  
TFIKKVYAAIEAGDK  
VYAAIEAGDKAAAQK  
VYAAIEAGDK  
AGVLAEVR  
EFYEKPTTER  
ENEPFDVALR  
ENEPFDVALRR  
REFYEKPTTER  
VRENEPFDVALR  
VRENEPFDVALRR  
<QYLTK  
ADIDYNTSEAHTTYGVIGVK  
EFADNLDSDFK  
EFADNLDSDFKVR  
GEILGGmAAVEQPEKPAAQPK  
GEILGGMAAVEQPEKPAAQPK  
GIKVEVSGR  
IVIERPAK  
KGEDVEK  
KPELDAK

KVVADIAGVPAQINIAEVR  
LGIVKPWNSTWFANTK  
LGIVKPWNSTWFANTKEFADNLDSDFK  
LVADSITSQLER  
PAAQPK  
PWNSTWFANTK  
QYLTK  
VPLHTLR  
VTIHTARPGIVIGK  
VVADIAGVPAQINIAEVR  
VVADIAGVPAQINIAEVRK  
VWIFK  
VWIFKGEILGGmAAVEQPEKPAAQPK  
VWIFKGEILGGMAAVEQPEKPAAQPK  
AALELAEQR  
AIMVNGR  
CKIEQAPGQHGAR  
EGTDLFLK  
EKPTWLEVDAGK  
EKPTWLEVDAGKmEGTFK  
EKPTWLEVDAGKMEGTFK  
GNTGENLLALLEGR  
GNTGENLLALLEGRLDNVVYR  
IEQAPGQHGAR  
IYGVLER  
LDNVVYR  
LKGNTGENLLALLEGR  
LKGNTGENLLALLEGRLDNVVYR  
LSDYGVQLR  
MEGTFK  
PTWLEVDAGK  
REGTDLFLK  
REGTDLFLKSGVR  
RIYGVLER  
SDLSADINEHLIVELYSK  
VKALELAEQR  
VVNIASYQVSPNDVVSIR

VVNIASYQVSPNDVVSIREK  
YLGPK  
Ac-AHIEK  
<QAGELQEK  
AREVPAAIQK  
ATIDGLENmNSPEmVAAK  
ATIDGLENmNSPEmVAAKR  
ATIDGLENmNSPEMVAAK  
ATIDGLENmNSPEMVAAKR  
ATIDGLENMNSPEmVAAK  
ATIDGLENMNSPEmVAAKR  
ATIDGLENMNSPEMVAAK  
ATIDGLENMNSPEMVAAKR  
AVLEVAGVHNVLAKAYGSTNPINVVR  
AVLEVAGVHNVLAK  
AYGSTNPINVVR  
EVPAAIQK  
GKSVEEILGK  
GVHTGSR  
IFSFTALTVVGDGNGR  
LIAVNR  
NmINVALNNGTLQHPVK  
NMINVALNNGTLQHPVK  
QAGELQEK  
RNmINVALNNGTLQHPVK  
RNMINVALNNGTLQHPVK  
SVEEILGK  
TVKGGRIFSFTALTVVGDGNGR  
VFmQPASEGTGIIAGGAmR  
VFmQPASEGTGIIAGGAMRAVLEVAGVHNVLAK  
VFmQPASEGTGIIAGGAMR  
VFMQPASEGTGIIAGGAmR  
VFMQPASEGTGIIAGGAMR  
VGFGYGK  
<QLAYPINK  
AHYVLMNVEAPQEVIDELETTFR  
AHYVLMNVEAPQEVIDELETTFR

DDFANETADDAEAGDSEEEEE  
FNDAVIR  
HAVTEASPmVK  
HAVTEASPMVK  
HYEIVFmVHPDQSEQVPGmIER  
HYEIVFmVHPDQSEQVPGMIER  
HYEIVFMVHPDQSEQVPGmIER  
HYEIVFMVHPDQSEQVPGMIER  
LEDWGR  
mRHYEIVFmVHPDQSEQVPGmIER  
mRHYEIVFmVHPDQSEQVPGMIER  
mRHYEIVFMVHPDQSEQVPGmIER  
mRHYEIVFMVHPDQSEQVPGMIER  
MRHYEIVFMVHPDQSEQVPGMIER  
QLAYPINK  
RDDFANETADDAEAGDSEEEEE  
RQLAYPINK  
TKHAVTEASPmVK  
TKHAVTEASPMVK  
YTAAITGAEGK  
<QPALGYLN  
FGSELLAK  
FGSELLAKFVNILMVDGK  
FVNILmVDGK  
FVNILmVDGKK  
FVNILMVDGK  
FVNILMVDGKK  
ILPDPK  
KILPDPK  
KILPDPKFGSELLAK  
KSTAESIVYSALETLAQR  
LANELSDAAENK  
LANELSDAAENKGTAVK  
LANELSDAAENKGTAVKK  
NALAmRWIVEAAR  
NALAMR  
QPALGYLN



RVGGSTYQVPVEVR  
RVGGSTYQVPVEVRPVR  
SELEAFEVALENVR  
SELEAFEVALENVRPTVEVK  
SELEAFEVALENVRPTVEVKSR  
SFSHQAGASSK  
SGKSELEAFEVALENVRPTVEVK  
STAESIVYSALETLAQR  
VGGSTYQVPVEVR  
VGGSTYQVPVEVRPVR  
VGGSTYQVPVEVRPVR  
WIVEAAR  
Ac-SMQDPIADMLTR  
<QAGLGGEIICYVA  
AAVTmPSSK  
AAVTMPSSK  
AVVESIQR  
EEGFIEDFK  
EEGFIEDFKVEGDTKPELELTLK  
KDELPAK  
KDELPAVmAGLGIADVSTSK  
LKVAIANVLK  
LKVAIANVLKEEGFIEDFK  
mSmQDPIADMLTR  
MSMQDPIADMLTR  
PELELTLK  
QAGLGGEIICYVA  
RKDELPAK  
SmQDPIADmLTR  
SmQDPIADMLTR  
SMQDPIADmLTR  
SMQDPIADMLTR  
VAIANVLK  
VAIANVLKEEGFIEDFK  
VEGDTKPELELTLK  
VmAGLGIADVSTSK  
VMAGLGIADVSTSK

VMAGLGIADVSTSKGVMTDR  
YFQGKAVVESIQR  
YFQGK  
<QPLELVDmVEK  
AENQYYGTGR  
ALmEYDESLR  
ALmEYDESLRSELR  
ALmEYDESLRSELRK  
ALMEYDESLR  
ALMEYDESLRSELR  
ALMEYDESLRSELRK  
GGGISGQAGAIR  
LDLYITVK  
mVVRQPLELVDmVEK  
mVVRQPLELVDmVEK  
MVVRQPLELVDmVEK  
QPLELVDmVEK  
QPLELVDmVEKLDLYITVK  
QPLELVDmVEKLDLYITVKGGGISGQAGAIR  
QPLELVDmVEK  
QPLELVDmVEKLDLYITVK  
SLEQYFGR  
VFIKPGNGK  
VFIKPGNGKIVINQR  
AENISVAQYCQmANYLAENAPLQES  
AENISVAQYCQMANYLAENAPLQES  
FGQNFLNDQFVIDSIVSAINPQK  
GQAmVEIGPGLAALTEPVGER  
GQAMVEIGPGLAALTEPVGER  
ITTEAFNQR  
LDQLTVIELDLDR  
LDQLTVIELDLDRDLAAR  
LQTHPFLGPK  
LTIYQQDAmTFNFGELA EK  
LTIYQQDAMTFNFGELA EK  
LVPHATMPHPVKDVR  
NSLGNLFSVEVLTGmGIDPAmR

NSLGNLFSVEVLTGmGIDPAMR  
NSLGNLFSVEVLTGMGIDPAmR  
<Q QEELLAEFNASDAR  
ALLQELCFGVLR  
AYPEQWQSIVEANNQRPPMWLR  
DSWLALLDEAGmK  
DSWLALLDEAGMK  
GFPHADYPDAVR  
GLINGVLR  
ILLDAPCSATGVIR  
IPPHAALAETVEGAIAIK  
QGDGRYPSQWCGEQQFDR  
QNLPGAEEGDGFFYAK  
QQEELLAEFNASDAR  
SmAAQAVEQVVEQGGQSLSNILPPLQQK  
SMAAQAVEQVVEQGGQSLSNILPPLQQK  
TADAELCETGTPEQPGK  
TADAELCETGTPEQPGKQNLPGAEEGDGFFYAK  
TGGTLVYATCSVLPEENSLQIK  
TLSQLDWLINK  
TTHILEVAPEAQVVAVDIDEQR  
YLHPSWLLK  
YPSQWCGEQQFDR  
<Q PVFDAEK  
<Q PVFDAEKFWGEYSVDGLTVK  
AHTQQFHWWQVLSR  
ATLAANGVEGEVFASNVFSEVK  
CGLYFGR  
DGLDVGSQLLLSTLTPHTK  
FDmIISNPPFHDMQTSLDAAQTLIR  
FDmIISNPPFHDMQTSLDAAQTLIR  
FDmIISNPPFHDMQTSLDAAQTLIR  
FDmIISNPPFHDMQTSLDAAQTLIR  
FSLVATADDVADCDTLIYYWPK  
FWGEYSVDGLTVK  
GKVLVCGAGVLSVAFAR  
GRFDmIISNPPFHDMQTSLDAAQTLIR

GRFDmIISNPPFHDGMQTSLDAAQTLIR  
GRFDMIISNPPFHDGmQTSLDAAQTLIR  
GRFDMIISNPPFHDGMQTSLDAAQTLIR  
HLNSGGELR  
HSDDFEQSR  
IDPEWVEPVAQHLIK  
ILFAGDLQDDLPAR  
IVANAFLPYPDVLDLDTFGFHEVIAQTGR  
LTLCDVSAPAVEASR  
QPVFDAEK  
QPVFDAEKFWGEYSVDGLTVK  
SAEQmLADYAPLNK  
SAEQmLADYAPLNKVDSAR  
SAEQMLADYAPLNK  
SAEQMLADYAPLNKVDSAR  
SAFTPASEVLLR  
TLPGVFSR  
VLDVGCAGVLSVAFAR  
GTPHNIVFDPPFR  
KLPVPDSPGLRPTTDR  
VVNSNAMSFLAQK  
YAAGATLIEmDR  
YAAGATLIEMDR  
ASNSINTLPLPVER  
IAIAACEQCGR  
IYHPEPLTSHSHIALCEDAANHIGR  
LLIGPEGGLSADEIAMmTAR  
LLIGPEGGLSADEIAMTAR  
mGPGQALQLFDGSNQVFDAEITSASK  
MGPQALQLFDGSNQVFDAEITSASK  
NRVPEIRPAMDLEAWCAEQDEGLK  
SIELGVSLITPLFSER  
TETTALTAITALQVR  
YQFTDILLGPR  
CGISNVALTHFDGR  
ETYPDAVEFLPLGDLFPGANK  
ELAEVVAAATPVK

ELAEVVAAATPVKDK  
FSIIHGPFSAALGEYVAER  
GPQVPAGLPrmTEEQLK  
GPQVPAGLPrmTEEQLKK  
GPQVPAGLPMTEEQLK  
GPQVPAGLPMTEEQLKK  
IDGILLDLGVSSPQLDDAER  
IWNSELEEIEQALK  
LILSQLGEEGR  
LLAIDRDPQAI(A)AVAK  
LmPGEEEEVAENPR  
LMPGEEEEVAENPR  
LSIISFHSLEDR  
SSLNVLAPGGR  
TKELAEVVAAATPVK  
TKELAEVVAAATPVKDK  
ALEVLQAVDLIAAEDTR  
HTGLLLQHFGINAR  
LLDSLEDIVAVLGESR  
LQEGQNIALVSDAGTPLINDPGYHLVR  
TLALLQAELPLKK  
TLIFYESTHR  
VVPLPGPCAAITALSAAGLPSDR  
DLTKPAVLEVITPTQVR  
FIAQQLGVSR  
GVQLHNEKDLTKPAVLEVITPTQVR  
LDIDTTGLV(L)mTDDGQWSHR  
LLPEHDVAYDGNPLAQQHGPR  
TYLVTLESPVADDTAEQFAK  
VTVDGEIVR  
ALEWLDVQPEDR  
IVYVSCNPATLAR  
LSLN(L)PK  
QCPILAPQLEALLPK  
QIITVSVNDLDSFGQGVAR  
<QEKEDSETFQGEGHFSVDEK  
DLPDLVY(M)TEAEK

DVDYIVKDGEVIIVDEHTGR  
ESFSmFAAmLESLK  
FYLSmEDALmR  
GEVLENLIPEAFVVR  
GLVLIEELLVK  
GQPVLVGTISIEK  
GVHVTVNDYLAQR  
GVmLQTLDSLWK  
GVMLQTLDSLWK  
HDAVLEAGGLHIIGTER  
ILAQSIEVYQR  
IQAIIEDIKER  
KTEALVAQIQQIDVTVHTETETEALLLEHNYIK  
LAQmQQLSHQDDDSAAAAALAAQTGER  
LAQMQLSHQDDDSAAAAALAAQTGER  
LEKGEVLENLIPEAFVVR  
LGmKPGEAIEHPWVTK  
LHYALVDEVDSILIDEAR  
MPEEVEELEQQR  
NELLDVSDVSETINSIR  
QLLEYDDVANDQR  
TLTATLPAYLNALTGK  
TPLIISGPAEDSSEmYKR  
TPLIISGPAEDSSEMYKR  
DISFEAPNAPHVFQK  
LDLDTASSQLADDVYEVVLR  
FVDPNLLVGNETR  
LFLTKPLGIGVLTAEK  
LSPEIAR  
FTGNVIGDIVDAQYK  
GADANILQQVR  
LAGTGEMVAEVTER  
AELLYGVIDNSDFYR  
ALTDFMVEFER  
AQIFNFSSGPAmLPAEVLK  
ASIYNAMPLEGVK  
DLLNVPSNYK

GQFAAVPLNILGDK  
NIGPAGLTIVIVR  
IQAFDDFFGYR  
mNTLGFDFK  
SQDTTLNELAALLSCSR  
IAIVNmGSLFQQVAQK  
IAIVNMGSLFQQVAQK  
TGVSNLENEFK  
QSGFLDPVNYR  
SFVAVHNQPGLYVGQQAR  
DLVVSLAYQVR  
DVFmGVDELQVGM  
DVFmGVDELQVGMR  
DVFmGVDELQVGM  
DVFmGVDELQVGMR  
FLAETDQGPVPEITAVEDDHVVVDGNHMLAGQNLK  
FNVEVVAIR  
DALAPHISAETIEYHYGK  
HHQTYVTNLNLIK  
NFGSGWTWLK  
SFELPALPYAK  
VAEIAASFGSFADFK  
GADGVLITFAK  
IVELPAGATPVDFAYAVHTDIGHACVGAR  
HILGLDHK  
IVTEGDKSSVNNPTGR  
KIVTEGDKSSVNNPTGR  
SSVNNPTGR  
AVETLILDEADR  
EAGINNCYLEGEVQGK  
GFTRPTAIQAAAIPPALDGR  
GIDIPDVSHVFNFDmPR  
ILILTPTR  
LLEDPEVSANPSTR  
mLDmGFAQDIEHIAGETR  
MLDMGFAQDIEHIAGETR  
TALLVHLLK

TVTTFSELELDESLLLEALQDK  
VNVLVATDVAAR  
DSFLASLTEAER  
LPQLGIEFSGPGAK  
ADGINPEELGNSSAAAPR  
ISTWLELMK  
AFAENWLK  
AVLVNIFGGIVR  
DLALIEINPLVITK  
ELYLGAVVDR  
GLTDAAQQVVAAVEGK  
LADSGLNIIAAK  
LGADGNALFR  
DSILEAIDAGIK  
SLADIGEALK  
LLVSELSGVEPK  
LSGDTLDGETAFR  
FGFLLDALK  
FLNAEIIEDILDR  
NP<sup>m</sup>ELTDVADLLK  
NPMELTDVADLLK  
GPIEFSNQELDDLIIR  
TALYSWLFAR  
ANDIVVALLQEK  
ASFVTLQDVGGR  
IAPELYLK  
TKTGELSIHCTELR  
ALRPLPKFHGLQDQEV  
GANEAIDFNDEL  
IVTEIFDEVAEAHLIQPTFITEYPAEVSPLAR  
TQTGELSIHCTELR  
VTYGEHVDFGKPFK  
WDLGDIIGAR  
YLDLIANDK  
VVASPGQGQQFEIQASK  
AELDALQAEIR  
EISSCSNVWDFQAR



LGEELDAAKAELDALQAEIR  
VLQLLGLPYR  
VLQLLGLPYRK  
ACAEAGVFLISPFVGR  
LAVNFGAEILK  
LTIAPNLLK  
QFTTVVADSGDIESIR  
ELAESEGAIER  
ILDWYK  
ITSEFLWQHNQDPmAVDK  
KLIDDAVAWAK  
LASTWQGIR  
LIDDAVAWAK  
LTIAPALLK  
LYNDAGISNDR  
LYQPQDATTNPSLILNAAQIPEYR  
mIGDLL  
NIGEILELAGCDR  
QYTTVVADTGDIAMK  
QYTTVVADTGDIAMK  
LEIEIAIVR  
KPIIYDVETLR  
AIEEGKLESFVTDIFYQR  
GPILTDSGGFQVFLGDIR  
ILEHVCPQIPADKPR  
NGHLFVTDGVVK  
NPINGDPIFLDPEK  
YLmGVGKPEDLVEGVR  
FVAINFEPVVGEILEK  
GIPTLLLK  
mIAPILDEIADEYQGK  
MIAPILDEIADEYQGK  
TTDELDAIFFGR  
VTDVLLASHENTAQIIDAR  
ANDIDVPAALIDSEIDVLR  
ANDIDVPAALIDSEIDVLR  
ASDFVLA mGQGR

ASDFVLAMGQGR  
ELPELTAEFIK  
FGVEDGSVEGLR  
GLIEEmASAYEDPKEVIEFYK  
GLIEEMASAYEDPKEVIEFYK  
INPAGAPTYVPGEYK  
mIPGFEDGIK  
MIPGFEDGIK  
MQVSVETTQGLGR  
NFIDAIK  
NVALEEQAWEAVLAK  
QDVLGDLMSR  
RVTITIAADSIETAVK  
VTEKETTfNELmNQQA  
VTITIAADSIETAVK  
VVVGLLLGEVIR  
ATYTQTHmDFIIEAFK  
ATYTQTHMDFIIEAFK  
AVEIGSFLLGR  
DSSFVDVYTECR  
EAEYKDWTEIQITR  
FAENAYFIK  
GAEQIYIPVLIK  
GIEEVGPNNVPYIVATITSNSAGGQPVSLANLK  
GLTFTYEPK  
GNFDLEGLER  
IAQVQYLVDGLEEIGVVCQQAGGHAAFVDAGK  
KYDIPVVmDSAR  
KYDIPVVMDSAR  
LAVGLYDgmNLDWLAYR  
LAVGLYDGMNLDWLAYR  
LLPHIPADQFPAQALACELYK  
mVAFSNYFFDTTQGHSQINGCTVR  
MVAFSNYFFDTTQGHSQINGCTVR  
NIFGYQYTIPTHQGR  
SYYALAESVK  
TLCVVQEGFPTYGGLEGGAmER

TLCVVQEGFPTYGGLEGGAMER  
YADMLAMSAK  
LFNAAK  
DELIR  
SALVIQTLANGAVR  
TmmmAQRLYEAGYITYMRTDSTNLSQDAVNmVR  
DLSDVTLGQFAGK  
NAEFLQAYGVAIADGPLK  
HTAMK  
TSGKvmVCGGDVFCLDGECDKAQSGK  
DADELLAILASK  
DGEPETPPNNWR  
FLHPEIVTVDPGYAEAGR  
QAACQLIAQVTGR  
VITPETTALLCATDTLALGASK  
IVQVPFAELVK  
NLSESNDYVPRPASRPVTK  
DNGAGVPDVGELLNYDADNVQHR  
ISAISAASVSLK  
LGYVTPLAAGAFPLTR  
AELDGPVIVCSTGIGGPSTSIAVEELAQLGIR  
AGMVAGVIVNR  
GSmEEWQAMGVmNYEmESATLLTmCASQGLR  
IGTTGAIQPHINVGDLVTTASVR  
LDGASLHFAPLEFPAVADFECTTALVEAAK  
NDLQGATLAIVPGDPDRVEK  
SDVFHLGLTK  
SIGATTHVGVVTASSDTFYPGQER  
TQQEIPNAETMK  
NEETLEPVPYFQK  
VLVLVAAPEGIAALEK  
ISVTSLSASAQGK  
QLINTVHVDmLIVPLRDEEE  
TILVPIDISDSELTQR  
DEVNELAEELGADVIVIGSR  
FGSVRDEVNELAEELGADVIVIGSR  
HAEFLAQDDGVIHLLHVLPGSASLSLHR

HANLPVLVVR  
LQTMVSHFTIDPSR  
NPSISTHLLGSNASSVIR  
TIImPVDVFEmELSDK  
TIIMPVDVFEEMELSDK  
SNPATYTGCVFTPVR  
TLENLASQGYIR  
mECFDISHTMGEQTVASCVVFDANGPLRAEYRR  
MECFDISHTmGEQTVASCVVFDANGPLRAEYRR  
NVFAELDVSWDKNHPLLLGVAK  
TLLADSLSELAGR  
TFLDQTGGLWASGALYGK  
TQTAPVATPQELADYDAIIFGTPTR  
VPETMPPQLFEK  
YQGEYVAGLAVK  
AFIDFLSEHVK  
ARPLFNSYR  
GELVELMADK  
IIASPDYISR  
LGVSLNR  
QLSLTEEGER  
VLPVEMPFSAVVYSDR  
YGLSSNSGETLK  
ALQILDLFNEQATELK  
EALmSALAQTR  
EQLQQAGLALSR  
TLQLHGYIDQNPENGK  
VDDAELANFREQLQQAGLALSR  
VIAALSLSTLTSR  
LVLELTER  
YLQAFPVDFIK  
LAHAMGAHVVAFTTSEAK  
SEWAGTVYPCVPGHEIVGR  
SPEVFNLIK  
VGVVGIGGLGHmGIK  
GIEGSSLDVPENIVHSGK  
PSFDIVSEVDLQEAR

VLSEDFQVNQLLDILR  
LQGQILKR  
VLTETIFELmGITPTLHGGQAQAK  
IATTNSGELLSLTPVEHVCR  
VIEFAQSGLKPLVK  
PGNINAWDNEDFVK  
AFQQQLAEVAIAGFQPQFNK  
TDIYNYDLPAR  
CGKPFTHQVYTTYCFSPVR  
LDYQGIYTPDQVER  
LPLTLPVR  
RLDYQGIYTPDQVER  
VAESVVSVDSDVECSmSFAIDNQR  
VAESVVSVDSDVECSMSFAIDNQR  
VKLPLTLPVR  
VTVTLECQR  
AHPADVLPQEMDKLR  
ELGGNYSDPDVPPR  
ELISGFADYVLQR  
EmmLELINQPEHFK  
HELDIAPPEPPYQPDEIYDALK  
PVVLK  
QWFGFISQSR  
APTLYAEFTNK  
LCHIIWRE  
HAGSAFSLFIDR  
IGPDIPmAIVGSPDYFSR  
IGPDIPMAIVGSPDYFSR  
LSmAQSALSQIVR  
LSMAQSALSQIVR  
DPSVVPFASAFDPDR  
MFSTGENWSR  
PQSGYYVAPQAIK  
ILSIDTEGLTAEQIR  
LAPLDLIR  
IVQSPDVIPADSEAGR  
KVEIPGVATTASPSSEVGR

LAEPAPTGEQLQNILR  
DLEKLEDEGFLTR  
VTVSNLSGIFQVTEETIRR  
PAGISNPKDFR  
LVADPLLFR  
GDYEDRVDDYIIK  
mETTKPSFQDVLEFVR  
VLLLDNLSDYIK  
VLLLDNLSDYIKPGmSVEAIQGIIASMK  
VLLLDNLSDYIKPGMSVEAIQGIIASmK  
VLLLDNLSDYIKPGMSVEAIQGIIASMK  
CPDIVLSSFLNGLIYEK  
TDDILAILTEQQFR  
QYHLSANEINQIINA  
VTFLGFDAATEAR  
AEAEQTLAALTEK  
ITPTFTEESDGVR  
<QVPAEAEEMGGEKVEEVAAEQAPNDEKEMGAK  
CEEIANELTR  
DAIDDLK  
EAVAERDAIDDLKAR  
EAVAERDAIDDLK  
GGVSHWLEGR  
GLISVEQEIK  
IAELEAALANK  
ITVLDNDGNR  
ITVLDNDGNRKPISNGAFYR  
KPISNGAFYR  
KYSVgmlCQVLAAmGGEYLGNNAGLQQK  
LITLLPNWIDK  
LITLLPNWIDKLGDE  
QVPAEAEEmGGEKVEEVAAEQAPNDEK  
QVPAEAEEmGGEKVEEVAAEQAPNDEKEmGAK  
QVPAEAEEmGGEKVEEVAAEQAPNDEKEMGAK  
QVPAEAEEMGGEKVEEVAAEQAPNDEK  
QVPAEAEEMGGEKVEEVAAEQAPNDEKEMGAK  
VHPEDRGEmlER

VHPEDRGEMELR  
HLSSQQLANEAGVSQSSVVK  
LADYLLLQPDAR  
LALSEALASQPESPSVPIHNQIR  
VLAITGFTPINALQQR  
<QAGYTVVTTSSSEQGKPLFK  
ASGTEHHGGVCFLIK  
AWFIQSVTPR  
AYHVVDEAELTK  
GVVVQDAALLESAAIR  
KAYHVVDEAELTK  
KWEDSPWR  
mVLVLGQEYEGLPDAAR  
mVLVLGQEYEGLPDAARDPNDLR  
MVLVLGQEYEGLPDAAR  
MVLVLGQEYEGLPDAARDPNDLR  
QAGYTVVTTSSSEQGKPLFK  
SFIDPEVLR  
SFIDPELRR  
TAEGGAEHVQPITGDNIVNVLDDFR  
VYGENACQALFQSRPEAIVR  
WEDSPWR  
AALANLFSLEPSK  
ALWLLAGSASR  
IIAGEIQARPEQVDAAVR  
AYIGQHmPLYCSAmGK  
EDDHAILYK  
ESGAAmDREENELGVSCIAVPVFDIHGR  
ETAQAISNELGFTVR  
IYmAFGHDPDYVK  
IYMAFGHPDYVK  
LLQGLQSCGYVTTAPAAGSYR  
NTITELPAmFDELAHIR  
NTITELPAMFDELAHIR  
SYWESHQHEIQPLTR  
VPYAVSISLSTSR  
ATAFAISVINDK

ATIPLLINLLK  
ATIPLLINLLKDPNGDVR  
DIGAFILGQIK  
FDDNEIITSAIDK  
AGFAQVFVLK  
ANNVGELEK  
LKELAAATSSADEGASVAYK  
IEIEAIAVR  
TGEVPADVAAQAR  
TIATENAPAAIGPYVQGVDLGNmIITSGQIPVNPk  
TPLWLASLIR  
AFFVVGNALDENPLIR  
ILGISLAQLR  
VASLHVPVVSSAR  
ALEQAIGVELFNR  
ELEIVLS  
HLLQQLESNLAELR  
LVVLNRDELVIPIQAYAYR  
WLYDFLTLEK  
ALEFGPIEELR  
TTQYGFFIDSSR  
LIIPR  
DESIR  
LADDVGIWPLVVIR



| Modified Sequence                |   | PD 1st control | PD 2nd control | PD 3rd control |
|----------------------------------|---|----------------|----------------|----------------|
| NH2-AAVL PANLIQAQR-COOH          | * |                |                |                |
| NH2-EAYELVAPILTK-COOH            | * |                | PD 2nd control |                |
| NH2-EFVESLET PR-COOH             | * |                |                |                |
| NH2-GYT VSIFNR-COOH              | * |                |                |                |
| NH2-IAAVAEDGEPC<Cmm*>VTYIGADGAGI | * |                | PD 2nd control |                |
| NH2-IVSYAQGFSQLR-COOH            | * |                |                |                |
| NH2-KDEDGNYLVDVILDEAANK-COOH     | * |                | PD 2nd control |                |
| NH2-VLSGPQAQPAGDKAEFIEK-COOH     | * |                |                |                |
| NH2-AIWEQELTDM<Mox>R-COOH        | * |                |                |                |
| NH2-AIWEQELTDMR-COOH             | * |                |                |                |
| NH2-ANYSNPPAHGASVVATILSNDALR-COO | * |                |                |                |
| NH2-C<Cmm*>TQELLFGK-COOH         | * |                |                |                |
| NH2-INLGIGVYKDETGKTPVLTSVK-COOH  | * |                |                |                |
| NH2-NYLGIDGIPEFGR-COOH           | * |                |                |                |
| NH2-SVFNSAGLEVR-COOH             | * |                |                |                |
| NH2-VGAC<Cmm*>TLVAADSETVDR-COOH  | * |                |                |                |
| NH2-AQLLADLADLDVLSTEDLK-COOH     | * |                |                |                |
| NH2-LAFDEFDEL AGDR-COOH          | * |                |                |                |
| NH2-SLNFLDFEQPIAELEAK-COOH       | * |                |                |                |
| NH2-NALQELIIDGIK-COOH            | * |                |                |                |
| NH2-VVEEAPAPGITPELR-COOH         | * |                |                |                |
| NH2-ADQIQWSAGIEPGDPR-COOH        | * |                | PD 2nd control |                |
| NH2-AM<Mox>IEAGAAAVHFEDQLASVK-CC | * |                | PD 2nd control |                |
| NH2-AMIEAGAAAVHFEDQLASVK-COOH    | * |                | PD 2nd control |                |
| NH2-DGYTFVSHQQEVTGYFDK-COOH      | * |                | PD 2nd control |                |
| NH2-GLAYAPYADLVWC<Cmm*>ETSTPDLEI | * |                |                |                |
| NH2-GSVNPEC<Cmm*>TLAQLGAAK-COOH  | * |                |                |                |
| NH2-GYINSLGALTGGQALQQAK-COOH     | * |                |                |                |
| NH2-KGYINSLGALTGGQALQQAK-COOH    | * |                | PD 2nd control |                |
| NH2-LAADVTGVPTLLVAR-COOH         | * |                | PD 2nd control |                |
| NH2-LLAYNC<Cmm*>SPSFNWQK-COOH    | * |                |                |                |
| NH2-NLDDKTIASFQQQLSDMGYK-COOH    | * |                |                |                |
| NH2-RADQIQWSAGIEPGDPR-COOH       | * |                |                |                |
| NH2-THAGIEQAISR-COOH             | * |                |                |                |
| NH2-TIASFQQQLSDMGYK-COOH         | * |                | PD 2nd control |                |
| NH2-TQQIEELQK-COOH               | * |                |                |                |

|                                    |   |                                              |
|------------------------------------|---|----------------------------------------------|
| NH2-TQQIEELQKEWTQPR-COOH           | * |                                              |
| NH2-VLVPTQEAIQK-COOH               | * |                                              |
| NH2-VTTIIQGGTSSVTALTGSTEESEQF-COOH | * | PD 2nd control                               |
| NH2-WEGITRPYSAEDVVK-COOH           | * |                                              |
| NH2-DAASFAPLHNPAPHLIGIEEALK-COOH   | * | PD 2nd control                               |
| NH2-EGTRPAVVIPPTNEELVIAQDASR-COOH  | * | PD 2nd control                               |
| NH2-FAIIDAVNGEEYLSGLAEC<Cmm*>FHLF  | * |                                              |
| NH2-LGVLGFVVDHER-COOH              | * |                                              |
| NH2-LVLVLNC<Cmm*>GSSSLK-COOH       | * |                                              |
| NH2-YTSSVVIDESVIQGIK-COOH          | * | PD 2nd control                               |
| NH2-VLLENLLR-COOH                  | * |                                              |
| NH2-DLVHAIPLYAIK-COOH              | * |                                              |
| NH2-EGIEPDQPGVVGPIK-COOH           | * |                                              |
| NH2-GFPLAYVGDVVGTGSSR-COOH         | * |                                              |
| NH2-LPTPEEYQTYVAQVDK-COOH          | * |                                              |
| NH2-FSPGYM<Mox>AM<Mox>AHQLPVAG     | * |                                              |
| NH2-VAFENIEDAAR-COOH               | * |                                              |
| NH2-AADIVLQAAIAAGAPK-COOH          | * | PD 2nd control PD 3rd control                |
| NH2-AAYSSGKPAIGVGAGNTPVVIDETADIKR  | * | PD 2nd control                               |
| NH2-AVTNVAELNALVER-COOH            | * | PD 1st control PD 2nd control PD 3rd control |
| NH2-EAGVQEADFLANVDK-COOH           | * | PD 3rd control                               |
| NH2-EAGVQEADFLANVDKLSSEDAFDDQC<C   | * |                                              |
| NH2-EYASFTQEQVDK-COOH              | * |                                              |
| NH2-FATHGGYLLQGK-COOH              | * |                                              |
| NH2-FLFNNGYADQITSVLK-COOH          | * | PD 2nd control PD 3rd control                |
| NH2-GAELANSFKPDVIALGGGSPM<Mox>D    | * |                                              |
| NH2-GAELANSFKPDVIALGGGSPMDAAK-C    | * |                                              |
| NH2-IAELAGFSVPENTK-COOH            | * | PD 3rd control                               |
| NH2-ILIGEVTVVDESEPFHEK-COOH        | * | PD 2nd control PD 3rd control                |
| NH2-ILINTPASQGGIGDLYNFK-COOH       | * |                                              |
| NH2-KGAELANSFKPDVIALGGGSPM<Mox>    | * |                                              |
| NH2-LAPSLTLGC<Cmm*>GSWGGNSISENV    | * | PD 2nd control                               |
| NH2-LLAWLETLK-COOH                 | * | PD 3rd control                               |
| NH2-LSPTLAMYSR-COOH                | * | PD 3rd control                               |
| NH2-LVAM<Mox>GGIGHTSC<Cmm*>LYTD    | * | PD 3rd control                               |
| NH2-LVAMGGIGHTSC<Cmm*>LYTDQDNQ     | * |                                              |
| NH2-MAVAESGM<Mox>GIVEDK-COOH       | * |                                              |

|                                       |   |                |                |                |
|---------------------------------------|---|----------------|----------------|----------------|
| NH2-MAVAESGMGIVEDK-COOH               | * |                |                | PD 3rd control |
| NH2-MIAVTTTSGTGSEVTPFAVVTTDDATGQK     | * |                |                |                |
| NH2-NAIIFSPHPR-COOH                   | * |                |                |                |
| NH2-NGALNAAIVGQPAYK-COOH              | * |                |                |                |
| NH2-NHFASEYIYNAYKDEK-COOH             | * |                | PD 2nd control |                |
| NH2-PAIGVGAGNTPVVIDETADIKR-COOH       | * |                |                | PD 3rd control |
| NH2-QILLDTYYGR-COOH                   | * |                |                |                |
| NH2-RGSLPIALDEVITDGHK-COOH            | * |                |                |                |
| NH2-TFDNGVIC<Cmm*>ASEQSVVVVDSVYI      | * |                |                |                |
| NH2-YAEIADHLGLSAPGDR-COOH             | * |                |                |                |
| NH2-YPLISELK-COOH                     | * |                |                | PD 3rd control |
| NH2-AAQYVASHPGEVC<Cmm*>PAK-COOH       | * |                |                |                |
| NH2-ATFVVDPPQGIIQAIEVTAEGIGR-COOH     | * |                |                |                |
| NH2-EGEATLAPSLDLVGK-COOH              | * | PD 1st control |                |                |
| NH2-EGEATLAPSLDLVGKI-COOH             | * | PD 1st control | PD 2nd control | PD 3rd control |
| NH2-LGVDVYAVSTDTHFTHK-COOH            | * |                | PD 2nd control | PD 3rd control |
| NH2-NFDNM<Mox>REDEGLADR-COOH          | * |                |                |                |
| NH2-NFDNMRDEGLADR-COOH                | * |                |                |                |
| NH2-NGEFIEITEK-COOH                   | * |                |                |                |
| NH2-NGEFIEITEKDTEGR-COOH              | * | PD 1st control |                | PD 3rd control |
| NH2-WKEGATLAPSLDLVGKI-COOH            | * |                |                |                |
| NH2-YAM<Mox>IGDPTGALTR-COOH           | * |                |                | PD 3rd control |
| NH2-YAMIGDPTGALTR-COOH                | * |                | PD 2nd control | PD 3rd control |
| NH2-ASLSAFDYLR-COOH                   | * |                | PD 2nd control |                |
| NH2-FGGQILDTVDIENYISVPK-COOH          | * |                |                |                |
| NH2-LIPAAVEGGLHQIETASGAVLK-COOH       | * |                |                |                |
| #Gln->pyro-Glu (N-term Q)#-QAGVYDLLSE | * |                |                |                |
| NH2-AFSLAIYHAHQH-COOH                 | * |                |                |                |
| NH2-EITHQLFLLGC<Cmm*>GAQMLK-COOH      | * |                |                |                |
| NH2-EM<Mox>PVNSIWEGSGNIMC<Cmm*        | * |                |                |                |
| NH2-EMPVNSIWEGSGNIMC<Cmm*>LDVLF       | * |                |                |                |
| NH2-FDC<Cmm*>ALGSHAMMR-COOH           | * |                |                |                |
| NH2-GLLIGM<Mox>GMTEK-COOH             | * |                |                |                |
| NH2-GLLIGMGMTEK-COOH                  | * |                |                |                |
| NH2-HVFGNPLIQQPLM<Mox>R-COOH          | * |                |                |                |
| NH2-HVFGNPLIQQPLMR-COOH               | * |                |                |                |
| NH2-LANVNPPELLR-COOH                  | * |                |                |                |

|                                         |   |                |                |
|-----------------------------------------|---|----------------|----------------|
| NH2-LSEQIQNDLLLR-COOH                   | * |                |                |
| NH2-M<Mox>ALQLEGQTALLFR-COOH            | * |                |                |
| NH2-MALQLEGQTALLFR-COOH                 | * |                |                |
| NH2-QAGVYDLLSEAFVEVK-COOH               | * |                |                |
| NH2-YASPPM<Mox>AQAWC<Cmm*>QVM           | * |                |                |
| NH2-YASPPMAQAWC<Cmm*>QVMLDTR-C          | * |                |                |
| NH2-AFQELNAIDVL-COOH                    | * | PD 2nd control | PD 3rd control |
| NH2-ANEAYLQGQLGNPK-COOH                 | * |                | PD 3rd control |
| NH2-APVIVQFSNGGASFIAGK-COOH             | * |                |                |
| NH2-ENNFALPAVNC<Cmm*>VGTDSINAVLI        | * | PD 2nd control |                |
| NH2-IFDFVKPGVITGDDVQK-COOH              | * | PD 2nd control | PD 3rd control |
| NH2-LLPWIDGLLDAGEK-COOH                 | * | PD 2nd control | PD 3rd control |
| NH2-VKAPVIVQFSNGGASFIAGK-COOH           | * | PD 2nd control | PD 3rd control |
| #Gln->pyro-Glu (N-term Q)#-QIEEISAAFER- | * | PD 2nd control |                |
| NH2-AGGM<Mox>GLILGR-COOH                | * |                |                |
| NH2-AGGMGLILGR-COOH                     | * |                |                |
| NH2-AGLINSGGAAGGETDLSDAVR-COOH          | * | PD 1st control | PD 3rd control |
| NH2-AHELGM<Mox>VTVLWAYLR-COOH           | * |                |                |
| NH2-AINYGYTDDR-COOH                     | * |                |                |
| NH2-AINYGYTDDRVSYSK-COOH                | * |                |                |
| NH2-C<Cmm*>M<Mox>TIPSDQLYLPGHDY         | * | PD 2nd control |                |
| NH2-C<Cmm*>MTIPSDQLYLPGHDYVDR-CC        | * |                |                |
| NH2-DADNLLQHR-COOH                      | * |                |                |
| NH2-IPFLVK-COOH                         | * |                |                |
| NH2-LAGTGYSILPVDQGVEHSAGASFAANP         | * |                |                |
| NH2-LINAVQDVYLDISK-COOH                 | * |                |                |
| NH2-LTSENPIDLVR-COOH                    | * | PD 1st control |                |
| NH2-NIVELAIEAGC<Cmm*>NC<Cmm*>VA         | * |                |                |
| NH2-NM<Mox>QTLYNTGR-COOH                | * |                |                |
| NH2-NMQTLYNTGR-COOH                     | * |                |                |
| NH2-QIEEISAAFER-COOH                    | * |                |                |
| NH2-RQIEEISAAFER-COOH                   | * |                |                |
| NH2-TDIAQLLGK-COOH                      | * |                |                |
| NH2-VM<Mox>IDNNRPPAVLR-COOH             | * |                |                |
| NH2-VMIDNNRPPAVLR-COOH                  | * |                |                |
| NH2-YQLANC<Cmm*>YM<Mox>GR-COOH          | * |                |                |
| NH2-YQLANC<Cmm*>YMGR-COOH               | * |                |                |

|                                |   |                               |
|--------------------------------|---|-------------------------------|
| NH2-TSAESILTTGPVVPVIVVK-COOH   | * | PD 2nd control                |
| NH2-AC<Cmm*>GFTLPNAPLTPR-COOH  | * | PD 2nd control                |
| NH2-ELVATLTELC<Cmm*>ER-COOH    | * | PD 2nd control PD 3rd control |
| NH2-FDEVGNLYGR-COOH            | * | PD 3rd control                |
| NH2-FPYVFWGSK-COOH             | * | PD 2nd control PD 3rd control |
| NH2-LLYSPEWLETQQQFK-COOH       | * | PD 2nd control PD 3rd control |
| NH2-M<Mox>GDPLVLTFGK-COOH      | * | PD 2nd control                |
| NH2-MGDPLVLTFGK-COOH           | * | PD 2nd control PD 3rd control |
| NH2-NIFGLANPDDVR-COOH          | * | PD 2nd control PD 3rd control |
| NH2-TLALM<Mox>LYQLAWQK-COOH    | * | PD 2nd control                |
| NH2-TNITDLAEGVK-COOH           | * | PD 3rd control                |
| NH2-DISTALGLK-COOH             | * |                               |
| NH2-DVLSVAGPFM<Mox>R-COOH      | * |                               |
| NH2-DVLSVAGPFMR-COOH           | * |                               |
| NH2-FVSQGELVR-COOH             | * |                               |
| NH2-GIAILQYLEK-COOH            | * |                               |
| NH2-LM<Mox>LLSGETVNVAIR-COOH   | * |                               |
| NH2-LTEDRFVSQGELVR-COOH        | * |                               |
| NH2-NGNEAVLIGQLEC<Cmm*>K-COOH  | * |                               |
| NH2-SGGSSVSISLNLDLPLSTTFR-COOH | * |                               |
| NH2-NTEQAQAFVVLK-COOH          | * |                               |
| NH2-VEIAHK-COOH                | * | PD 2nd control PD 3rd control |
| NH2-NEDIFIPLQVR-COOH           | * |                               |
| NH2-NQVEQAGFAVLK-COOH          | * |                               |
| NH2-QNVKQQLFALAPVAGFK-COOH     | * |                               |
| NH2-QPSGSSVFALSTK-COOH         | * |                               |
| NH2-TATFQQEVAESILAGIK-COOH     | * |                               |
| NH2-VGQFDPQTVR-COOH            | * |                               |
| NH2-VVVDIEDVNLNSVLK-COOH       | * |                               |
| NH2-YLAQTQNASDLIGGVSK-COOH     | * |                               |
| NH2-GATGRPVALLAQFLNR-COOH      | * |                               |
| NH2-LVLC<Cmm*>DVLTYVER-COOH    | * |                               |
| NH2-FVEAEGFSVVR-COOH           | * |                               |
| NH2-FLAFGETHLADVLVSK-COOH      | * |                               |
| NH2-WDAAQSLLATYIK-COOH         | * |                               |
| NH2-QGITSYSLVPFPGH-COOH        | * | PD 2nd control                |
| NH2-EQANVALM<Mox>FLTGR-COOH    | * |                               |

|                                     |   |                |                |                |
|-------------------------------------|---|----------------|----------------|----------------|
| NH2-EQANVALMFLTGR-COOH              | * |                |                |                |
| NH2-HFESTPDTPEIIATIHGEGYR-COOH      | * |                |                |                |
| NH2-EVLEALANER-COOH                 | * |                |                |                |
| NH2-NIFLVGPM<Mox>GAGK-COOH          | * |                |                |                |
| NH2-NIFLVGPMGAGK-COOH               | * |                |                |                |
| NH2-NPLYEEIADV TIR-COOH             | * |                |                |                |
| NH2-VVANQIIHMLESN-COOH              | * |                |                |                |
| NH2-DLGAVFLVGIGGK-COOH              | * |                | PD 2nd control |                |
| NH2-ERAIK-COOH                      | * |                |                | PD 3rd control |
| NH2-LGLIEVQAPILSR-COOH              | * | PD 1st control | PD 2nd control |                |
| NH2-STVEAIWAGIK-COOH                | * |                |                |                |
| NH2-ALVDAGYDGIVSAGVGNLNYK-COOH      | * |                |                |                |
| NH2-GVLVVMNDTVLDGR-COOH             | * |                | PD 2nd control |                |
| NH2-SVFDLATAAK-COOH                 | * |                |                |                |
| NH2-VGIVYNYANASDLPK-COOH            | * | PD 1st control | PD 2nd control | PD 3rd control |
| NH2-VGVENLVNAV PQLK-COOH            | * | PD 1st control | PD 2nd control |                |
| NH2-VPTGATTQDAEVDDAKYGFVASGTLNPG    | * |                | PD 2nd control |                |
| NH2-ELAAFSQFASDLDDATR-COOH          | * | PD 1st control |                |                |
| NH2-GPLDHDGFSAVEAIAPGVIER-COOH      | * |                |                |                |
| NH2-IAQFNVVSEAHNEG TIVSVSDGVIR-COOH | * |                |                |                |
| NH2-TALAI DAIINQR-COOH              | * | PD 1st control |                |                |
| NH2-VNAEYVEAFTK-COOH                | * |                |                |                |
| NH2-YAIALNLER-COOH                  | * |                |                |                |
| NH2-AAPSYEELSNSQELLE TGIK-COOH      | * | PD 1st control |                |                |
| NH2-DVLLFVDNIYR-COOH                | * | PD 1st control |                | PD 3rd control |
| NH2-FLSQPFFVAEVFTGSPGK-COOH         | * |                | PD 2nd control | PD 3rd control |
| NH2-LVLEVQQQLGGGIVR-COOH            | * | PD 1st control |                |                |
| NH2-QIASLGIYPAVDPLDSTSR-COOH        | * | PD 1st control |                |                |
| NH2-YTLAGTEVSALLGR-COOH             | * | PD 1st control | PD 2nd control | PD 3rd control |
| NH2-QVAILAVAGA EK-COOH              | * |                |                | PD 3rd control |
| NH2-SVDEAANSDIVDKLV AEL-COOH        | * |                |                |                |
| NH2-ILFLEGLPNLQDLGK-COOH            | * |                |                |                |
| NH2-LLGNELVAINQYFLHAR-COOH          | * |                |                |                |
| NH2-LNIGEDVEEMLR-COOH               | * |                |                |                |
| NH2-MGLQNYLQAQIR-COOH               | * |                | PD 2nd control |                |
| NH2-ASLVWDEAQK-COOH                 | * |                |                |                |
| NH2-DPSLSLYAIPDGDVK-COOH            | * |                | PD 2nd control |                |

|                                        |   |                                              |
|----------------------------------------|---|----------------------------------------------|
| NH2-GPTLLEDFILR-COOH                   | * | PD 2nd control                               |
| NH2-LFWLSQTPFEQR-COOH                  | * |                                              |
| NH2-LIPEELVPVQR-COOH                   | * |                                              |
| NH2-SADLLAILK-COOH                     | * | PD 2nd control                               |
| NH2-VVAILLNDEVR-COOH                   | * |                                              |
| NH2-RAEYDQMWQHR-COOH                   | * |                                              |
| NH2-TISYNLPVYNAFGM<Mox>IEQEIPK-CO      | * |                                              |
| NH2-TISYNLPVYNAFGMIEQEIPK-COOH         | * |                                              |
| NH2-ADAPLIQWDATSATLK-COOH              | * | PD 2nd control                               |
| NH2-GYDYPDIQR-COOH                     | * |                                              |
| NH2-SATGLDEDALAFALLPLAAAC<Cmm*>A       | * |                                              |
| NH2-TLLM<Mox>DEQDHGYALTGDALSQAA        | * | PD 2nd control                               |
| NH2-TPLSNFNVGAIAR-COOH                 | * |                                              |
| NH2-VGDIVIFNDGYGVK-COOH                | * | PD 2nd control PD 3rd control                |
| #Gln->pyro-Glu (N-term Q)#-QQIEEATSDYI | * |                                              |
| NH2-AAVEEGVVAGGGVALIR-COOH             | * | PD 1st control PD 2nd control PD 3rd control |
| NH2-AGKPLIIAEDVEGEALATLVVNTM<Mox>      | * |                                              |
| NH2-AGKPLIIAEDVEGEALATLVVNTMR-CO       | * |                                              |
| NH2-AIAQVGTISANSDETVGK-COOH            | * | PD 2nd control PD 3rd control                |
| NH2-AM<Mox>LQDIATLTGGTVISEEIGM<M       | * | PD 3rd control                               |
| NH2-AM<Mox>LQDIATLTGGTVISEEIGMELE      | * |                                              |
| NH2-AMLQDIATLTGGTVISEEIGM<Mox>ELE      | * |                                              |
| NH2-AMLQDIATLTGGTVISEEIGMELEK-COO      | * |                                              |
| NH2-ANDAAGDGTATVLAQAIIITEGLK-COO       | * | PD 2nd control PD 3rd control                |
| NH2-ATLEDLGQAK-COOH                    | * |                                              |
| NH2-AVAAGM<Mox>NPMDLK-COOH             | * |                                              |
| NH2-AVAAGMNPMP<Mox>DLK-COOH            | * |                                              |
| NH2-AVAAGMNPMDLK-COOH                  | * |                                              |
| NH2-AVAAGMNPMDLKR-COOH                 | * |                                              |
| NH2-AVTAAVEELK-COOH                    | * | PD 3rd control                               |
| NH2-DTTTTIDGVGEEAAIQGR-COOH            | * | PD 1st control PD 2nd control PD 3rd control |
| NH2-EGVITVEDGTGLQDELDDVVEGM<Mox>       | * |                                              |
| NH2-EGVITVEDGTGLQDELDDVVEGMQFDR-C      | * |                                              |
| NH2-EIELEDKFENM<Mox>GAQM<Mox>VK        | * | PD 2nd control PD 3rd control                |
| NH2-EIELEDKFENMGAQM<Mox>VK-COOH        | * | PD 2nd control                               |
| NH2-EIELEDKFENMGAQMVK-COOH             | * | PD 2nd control PD 3rd control                |
| NH2-EM<Mox>LPVLEAVAK-COOH              | * | PD 3rd control                               |

|                                     |   |                                              |
|-------------------------------------|---|----------------------------------------------|
| NH2-EMLPVLEAVAK-COOH                | * | PD 2nd control                               |
| NH2-GGDGNYGYNAATEEYGNM<Mox>IDM      | * | PD 2nd control                               |
| NH2-GGDGNYGYNAATEEYGNMIDMGILDPT     | * |                                              |
| NH2-GVNVLADAVK-COOH                 | * | PD 2nd control PD 3rd control                |
| NH2-GYLSPYFINKPETGAVELESPFILLADK-CC | * |                                              |
| NH2-GYLSPYFINKPETGAVELESPFILLADKK-C | * |                                              |
| NH2-KAM<Mox>LQDIATLTGGTVISEEIGM<    | * |                                              |
| NH2-LAGGVAVIK-COOH                  | * |                                              |
| NH2-QIVLNC<Cmm*>GEEPSVVANTVK-COC    | * | PD 2nd control PD 3rd control                |
| NH2-QQIEEATSDYDREK-COOH             | * |                                              |
| NH2-RVVINKDTTTIIDGVGEEAAIQGR-COOH   | * | PD 2nd control                               |
| NH2-SALQYAASVAGLMITTEC<Cmm*>M<M     | * |                                              |
| NH2-SALQYAASVAGLMITTEC<Cmm*>MVT     | * |                                              |
| NH2-SFGAPTITK-COOH                  | * |                                              |
| NH2-VEDALHATR-COOH                  | * | PD 2nd control                               |
| NH2-VGAATEVEMK-COOH                 | * |                                              |
| NH2-VVINKDTTTIIDGVGEEAAIQGR-COOH    | * | PD 1st control PD 2nd control PD 3rd control |
| NH2-GTLGQDVIDIR-COOH                | * |                                              |
| NH2-ITFIDGDEGILLHR-COOH             | * | PD 2nd control                               |
| NH2-LYPNVDFYSGIILK-COOH             | * |                                              |
| NH2-YSIGQPFVYPR-COOH                | * |                                              |
| NH2-AIEALTEAIK-COOH                 | * |                                              |
| NH2-ALGIELLR-COOH                   | * |                                              |
| NH2-EALEAC<Cmm*>SVDLVALR-COOH       | * |                                              |
| NH2-IDITEPSIEETVQIINGLKPK-COOH      | * |                                              |
| NH2-IFTPEFR-COOH                    | * |                                              |
| NH2-IVQGDVPEVM<Mox>ADC<Cmm*>TIY     | * |                                              |
| NH2-LDVVNFISHGTR-COOH               | * |                                              |
| NH2-LIGAPPGYVGFDDQGGLLTDAVIK-COOH   | * |                                              |
| NH2-M<Mox>ENFTTNLNQLAR-COOH         | * |                                              |
| NH2-MENFTTNLNQLAR-COOH              | * |                                              |
| NH2-NELTYGFQSAQK-COOH               | * |                                              |
| NH2-NNPLLVGESGVGK-COOH              | * |                                              |
| NH2-NVVLVMTTNAGVR-COOH              | * |                                              |
| NH2-SIGLIHQDNSTDAM<Mox>EEIKK-COOH   | * |                                              |
| NH2-SIGLIHQDNSTDAMEEIKK-COOH        | * |                                              |
| NH2-TAIAEGLAWR-COOH                 | * |                                              |



|                                  |   |                |                |
|----------------------------------|---|----------------|----------------|
| NH2-TVNVADIESVVAR-COOH           | * |                |                |
| NH2-VGGIDPLIGR-COOH              | * |                |                |
| NH2-VIGSTTYQEFSNIFEK-COOH        | * |                |                |
| NH2-VIGSTTYQEFSNIFEKDR-COOH      | * |                |                |
| NH2-AAGATTANITQAIEQM<Mox>R-COOH  | * |                |                |
| NH2-ADGAM<Mox>DAGNMLKPALAR-COO   | * |                |                |
| NH2-AGLADPNRPIGSFLFLGPTGVGK-COOH | * |                |                |
| NH2-AIDLIDEAASSIR-COOH           | * |                |                |
| NH2-AIQQQIENPLAQQILSGELVPGK-COOH | * |                |                |
| NH2-ELVLGVVSHNFRPEFINR-COOH      | * |                |                |
| NH2-GELHC<Cmm*>VGATTLDEYR-COOH   | * |                |                |
| NH2-GYEIHISDEALK-COOH            | * |                |                |
| NH2-IDMSEFMEK-COOH               | * |                |                |
| NH2-LLENGYDPVYGAR-COOH           | * |                |                |
| NH2-LPQVEGTGGDVQPSQDLVR-COOH     | * |                |                |
| NH2-LVGAPPGYVGYEEGGYLTEAVR-COOH  | * |                |                |
| NH2-NTVVIMTSNLGSDLIQER-COOH      | * |                |                |
| NH2-QEGNVILFIDELHTM<Mox>VGAGK-CO | * |                |                |
| NH2-QEGNVILFIDELHTMVGAGK-COOH    | * |                |                |
| NH2-QLPDKAIDLIDEAASSIR-COOH      | * |                |                |
| NH2-QYSELEEEWKAEK-COOH           | * |                |                |
| NH2-RLDMLNEELSDKER-COOH          | * |                |                |
| NH2-VFVAEPSVEDTIAILR-COOH        | * |                |                |
| NH2-VIGQNEAVDAVSNAIR-COOH        | * |                |                |
| NH2-VLALDM<Mox>GALVAGAK-COOH     | * |                |                |
| NH2-VLALDMGALVAGAK-COOH          | * |                |                |
| NH2-VTDAEIAEVLAR-COOH            | * |                |                |
| NH2-AETLYYIVK-COOH               | * |                |                |
| NH2-IAQTLNLAK-COOH               | * |                |                |
| NH2-QLIQVNPDILM<Mox>R-COOH       | * |                |                |
| NH2-VGNLAFLDVTGR-COOH            | * | PD 1st control |                |
| NH2-AYSLLEQLR-COOH               | * | PD 1st control | PD 3rd control |
| NH2-DLGYGLLLK-COOH               | * |                | PD 2nd control |
| NH2-FAIQIPYALGIIATR-COOH         | * |                |                |
| NH2-RYTPNVADATEAQIQQATK-COOH     | * |                |                |
| NH2-YTPNVADATEAQIQQATK-COOH      | * | PD 1st control |                |
| NH2-FGDGIISAINFK-COOH            | * |                |                |

|                                    |   |                                              |
|------------------------------------|---|----------------------------------------------|
| NH2-LDLADAILLSK-COOH               | * |                                              |
| NH2-DVVDAVALR-COOH                 | * |                                              |
| NH2-HLTQVTPAGQEIR-COOH             | * |                                              |
| NH2-LGLGVGVIASM<Mox>AVDPVADPDLV    | * |                                              |
| NH2-M<Mox>LEDELGIQIFSR-COOH        | * |                                              |
| NH2-MLEDELGIQIFSR-COOH             | * |                                              |
| NH2-SNEEIEVMFK-COOH                | * |                                              |
| NH2-SVAGEHTWPKGSLYIATHTQAR-COC     | * |                                              |
| NH2-VSLHM<Mox>HQGSPTQIADAVSK-COO   | * |                                              |
| NH2-VSLHMHQGSPTQIADAVSK-COOH       | * |                                              |
| NH2-YALPNVIK-COOH                  | * |                                              |
| NH2-YIVEVNVHNLNVSSTAEGLYTSQPGISK-C | * |                                              |
| NH2-AEEIVASNPEK-COOH               | * |                                              |
| NH2-ALGANLVLTEGAK-COOH             | * | PD 1st control                               |
| NH2-GVLKPGVELVEPTSGNTGIALAYVAAAR-  | * |                                              |
| NH2-IFEDNSLTIGHTPLVR-COOH          | * | PD 2nd control                               |
| NH2-IGANMIWDAEK-COOH               | * | PD 2nd control                               |
| NH2-IQGIGAGFIPANLDLK-COOH          | * | PD 1st control PD 2nd control PD 3rd control |
| NH2-LM<Mox>EEEEILAGISSGAAVAAALK-C  | * |                                              |
| NH2-LMEEEEILAGISSGAAVAAALK-COOH    | * |                                              |
| NH2-LTLTM<Mox>PETM<Mox>SIER-COOH   | * |                                              |
| NH2-LTLTMPETMSIER-COOH             | * | PD 2nd control                               |
| NH2-LVDKVIGITNEEAISTAR-COOH        | * |                                              |
| NH2-NIVVILPSSGER-COOH              | * | PD 1st control                               |
| NH2-RLM<Mox>EEEEILAGISSGAAVAAALK-  | * |                                              |
| NH2-RLMEEEEILAGISSGAAVAAALK-COOH   | * |                                              |
| NH2-VIGITNEEAISTAR-COOH            | * |                                              |
| NH2-YLLLQQFSNPANPEIHEK-COOH        | * | PD 1st control PD 2nd control                |
| NH2-YLSTALFADLFTEK-COOH            | * |                                              |
| NH2-QALAILQGLK-COOH                | * |                                              |
| NH2-IPVIAGTGANATAEAISLTQR-COOH     | * | PD 2nd control                               |
| NH2-LFVEPNPIPVK-COOH               | * |                                              |
| NH2-EAVNQVIALLDGALR-COOH           | * |                                              |
| NH2-M<Mox>QQLQNIIFETAFER-COOH      | * |                                              |
| NH2-VGINELLR-COOH                  | * |                                              |
| NH2-VPAGSVVVSIGNLPSK-COOH          | * |                                              |
| NH2-VPAGSVVVSIGNLPSKDGK-COOH       | * |                                              |

|                                   |   |                |                |                |
|-----------------------------------|---|----------------|----------------|----------------|
| NH2-ANIGFMQVVK-COOH               | * |                |                |                |
| NH2-MVLTVTDDDLVR-COOH             | * |                |                |                |
| NH2-AALESTLAAITESLK-COOH          | * |                |                |                |
| NH2-EGDAVQLVGFQTFK-COOH           | * |                |                |                |
| NH2-IAAANVPAFVSGK-COOH            | * |                |                | PD 3rd control |
| NH2-TQLIDVIAEKAELSK-COOH          | * |                |                |                |
| NH2-TQLIDVIAEK-COOH               | * | PD 1st control |                |                |
| NH2-ALDAIIASVTEK-COOH             | * |                |                |                |
| NH2-EGDDVALVGFQTFK-COOH           | * |                |                |                |
| NH2-SQLIDKIAAGADISK-COOH          | * |                |                |                |
| NH2-C<Cmm*>VNMVADLWHAPAK-COOH     | * | PD 1st control | PD 2nd control | PD 3rd control |
| NH2-DDVAFQIINDELYLDGNAR-COOH      | * |                |                |                |
| NH2-FGLAPLGC<Cmm*>GWVIWR-COOH     | * | PD 1st control | PD 2nd control | PD 3rd control |
| NH2-GFEM<Mox>DFAELLLEDYK-COOH     | * |                |                |                |
| NH2-GFEMDFAELLLEDYK-COOH          | * |                |                |                |
| NH2-GWQVPAFTLGGEATDIVVM<Mox>R-C   | * |                |                |                |
| NH2-GWQVPAFTLGGEATDIVVMR-COOH     | * |                | PD 2nd control |                |
| NH2-LGPYEFIC<Cmm*>TGRPDEGIPAVC<Cr | * |                | PD 2nd control | PD 3rd control |
| NH2-LKDGEDPGYTYDLR-COOH           | * | PD 1st control | PD 2nd control | PD 3rd control |
| NH2-LQGIAQQNSFK-COOH              | * |                |                | PD 3rd control |
| NH2-NWIDKEEYPQSAIDLK-COOH         | * | PD 1st control | PD 2nd control |                |
| NH2-PAGQVIAQYEFK-COOH             | * | PD 1st control | PD 2nd control | PD 3rd control |
| NH2-QNLATFC<Cmm*>QTWDDENVHK-CO    | * | PD 1st control |                | PD 3rd control |
| NH2-VQNASYQVAAYLADEIAK-COOH       | * | PD 1st control | PD 2nd control | PD 3rd control |
| NH2-YWDVELR-COOH                  | * | PD 1st control | PD 2nd control |                |
| NH2-FIDLFAGIGIR-COOH              | * |                |                |                |
| NH2-LLQIYDVK-COOH                 | * |                |                |                |
| NH2-LMGFEAPGEAK-COOH              | * |                |                |                |
| NH2-QFGNSVVPVFAAVAK-COOH          | * |                |                |                |
| NH2-TLVAQLNGVGENHWSAAILK-COOH     | * |                |                |                |
| NH2-VTLAQLLDPM<Mox>VEAK-COOH      | * |                |                |                |
| NH2-VTLAQLLDPMVEAK-COOH           | * |                |                |                |
| NH2-DAGLNIAPFITLR-COOH            | * |                |                |                |
| NH2-AEFETTFADLGLK-COOH            | * |                |                |                |
| NH2-ALLFVENR-COOH                 | * |                |                |                |
| NH2-APILEALNDLGYEKPSPIQAEC<Cmm*>I | * |                |                |                |
| NH2-APQILVLAPTR-COOH              | * |                |                |                |

NH2-DVGDM<Mox>QLYR-COOH \*  
NH2-DVGDMQLYR-COOH \*  
NH2-DVLGM<Mox>AQTGSGK-COOH \*  
NH2-ELAVQVAEAM<Mox>TDFSK-COOH \*  
NH2-ELAVQVAEAMTDFSK-COOH \*  
NH2-FLEAEDFDAIIFVR-COOH \*  
NH2-GMPGEVLQHFTR-COOH \*  
NH2-GVNVVALYGGQR-COOH \*  
NH2-HIVGAIANEGDISSR-COOH \*  
NH2-IEVGRDDGVEVR-COOH \*  
NH2-ILNKPM<Mox>NM<Mox>QLLGDAQPH \* \*  
NH2-ILNKPM<Mox>NMQLLGDAQPHTGGEI \* \*  
NH2-ILNKPMNM<Mox>QLLGDAQPHTGGEI \* \*  
NH2-ILNKPMNMQLLGDAQPHTGGER-COOH \* \*  
NH2-IQPTAEGEELDLETAAALLK-COOH \* \*  
NH2-IQSSVTTRPDISQSYWTVWGM<Mox>R \* \*  
NH2-IQSSVTTRPDISQSYWTVWGMR-COOH \* \*  
NH2-ISLVVNYDIPM<Mox>DSESYVHR-COOH \* \*  
NH2-ISLVVNYDIPMDSESYVHR-COOH \* \*  
NH2-LDILIATDVAAR-COOH \* \*  
NH2-LFASHSTIELPK-COOH \* \*  
NH2-LKDGRLDILIATDVAAR-COOH \* \*  
NH2-LSGLVLDEADEM<Mox>LR-COOH \* \*  
NH2-LSGLVLDEADEMLR-COOH \* \*  
NH2-LTIPEVELPNAELLGK-COOH \* \*  
NH2-M<Mox>GFIEDVETIMAQIPEGHQTALF \* \*  
NH2-MGFIEDVETIM<Mox>AQIPEGHQTALF \* \*  
NH2-MGFIEDVETIMAQIPEGHQTALFSATMP \* \*  
NH2-MGFIEDVETIMAQIPEGHQTALFSATMP \* \*  
NH2-NATLEVAEALER-COOH \* \*  
NH2-NGYNSAALNGDM<Mox>NQALR-COO \* \*  
NH2-NGYNSAALNGDMNQALR-COOH \* \*  
NH2-QGPQIVVGTTPGR-COOH \* \*  
NH2-RDVGDMQLYR-COOH \* \*  
NH2-TAAFSLPLLQNLDPKAPQILVLAPTR-C \* \*  
NH2-TAAFSLPLLQNLDPK-COOH \* \*  
NH2-TKNATLEVAEALER-COOH \* \*

|                                           |   |                |                |                |
|-------------------------------------------|---|----------------|----------------|----------------|
| NH2-TLIVPPDAPM<Mox>RPK-COOH               | * |                |                |                |
| NH2-TLIVPPDAPMRPK-COOH                    | * |                |                |                |
| NH2-VQQQLLESSDLQYR-COOH                   | * |                |                |                |
| NH2-LVLINPELLEK-COOH                      | * |                | PD 2nd control |                |
| NH2-GAFVSQVLPNSSAAK-COOH                  | * |                |                |                |
| NH2-ATGLDALFDATIK-COOH                    | * |                | PD 2nd control |                |
| NH2-DVAGYAAGLELFDR-COOH                   | * |                | PD 2nd control |                |
| NH2-ETFADIGQTLAK-COOH                     | * |                |                |                |
| NH2-FGDVVGADTLGHIAEAC<Cmm*>AK-COOH        | * |                | PD 2nd control |                |
| NH2-GPLNLPNLTR-COOH                       | * |                |                |                |
| NH2-TGNRHDLAVEPPAPTVLQK-COOH              | * |                |                |                |
| NH2-ALM<Mox>AGNEQVGFDLVK-COOH             | * |                |                |                |
| NH2-FGASSLLASLLK-COOH                     | * | PD 1st control |                |                |
| NH2-IATVTNFPHGNDIDIALAETR-COOH            | * | PD 1st control |                |                |
| NH2-TPVGNTAAIC<Cmm*>IYPR-COOH             | * |                |                |                |
| NH2-ALTIC<Cmm*>TVSDHIR-COOH               | * |                |                |                |
| NH2-ATPHINAEM<Mox>GDFADVFLM<Mox>RPPK-COOH | * |                |                |                |
| NH2-IAESVLLGDKE-COOH                      | * | PD 1st control | PD 2nd control | PD 3rd control |
| NH2-YIAETFLEDAR-COOH                      | * |                | PD 2nd control | PD 3rd control |
| NH2-FWDYQQGSWQEEQTK-COOH                  | * |                | PD 2nd control |                |
| NH2-LINDVQDVLDEQLAGLAK-COOH               | * |                |                |                |
| NH2-VIALVNNLGATPLSELYGVYNR-COOH           | * |                |                |                |
| NH2-QLAEDNFGETEEVAPPTLRPVPVSGK-COOH       | * |                | PD 2nd control |                |
| NH2-INQLVVEPTLQTTR-COOH                   | * |                |                |                |
| NH2-VLTQTMVTSADDEGLHTK-COOH               | * |                |                |                |
| NH2-AGVEVDDR-COOH                         | * | PD 1st control | PD 2nd control | PD 3rd control |
| NH2-AGVEVDDRGFIR-COOH                     | * | PD 1st control |                | PD 3rd control |
| NH2-AIASDC<Cmm*>ADGM<Mox>TK-COOH          | * |                | PD 2nd control | PD 3rd control |
| NH2-AIASDC<Cmm*>ADGMTK-COOH               | * | PD 1st control | PD 2nd control | PD 3rd control |
| NH2-ALAEHGIVFGEPK-COOH                    | * | PD 1st control | PD 2nd control | PD 3rd control |
| NH2-APAEPQRYDAVLVAIGR-COOH                | * | PD 1st control | PD 2nd control | PD 3rd control |
| NH2-C<Cmm*>ADLGLETVIVER-COOH              | * | PD 1st control | PD 2nd control | PD 3rd control |
| NH2-EDGIYVTM<Mox>EGK-COOH                 | * |                | PD 2nd control | PD 3rd control |
| NH2-EDGIYVTMEGK-COOH                      | * |                | PD 2nd control | PD 3rd control |
| NH2-EDGIYVTMEGKK-COOH                     | * |                |                | PD 3rd control |
| NH2-EKGISYETATFPWAASGR-COOH               | * | PD 1st control | PD 2nd control | PD 3rd control |
| NH2-EKVINQLTGGLAGM<Mox>AK-COOH            | * | PD 1st control | PD 2nd control | PD 3rd control |

|                                       |   |                |                               |
|---------------------------------------|---|----------------|-------------------------------|
| NH2-EKVINQLTGGLAGMAK-COOH             | * | PD 1st control | PD 3rd control                |
| NH2-FNLM<Mox>LETK-COOH                | * | PD 1st control | PD 2nd control PD 3rd control |
| NH2-FNLMLETK-COOH                     | * | PD 1st control | PD 2nd control PD 3rd control |
| NH2-FTGANTLEVEGENGK-COOH              | * | PD 1st control | PD 2nd control PD 3rd control |
| NH2-GISYETATFPWAASGR-COOH             | * | PD 1st control | PD 2nd control PD 3rd control |
| NH2-GVHEGHVAAEVIAGK-COOH              | * | PD 1st control | PD 2nd control                |
| NH2-GVHEGHVAAEVIAGKK-COOH             | * |                | PD 2nd control PD 3rd control |
| NH2-IWDSTDALELK-COOH                  | * | PD 1st control | PD 2nd control PD 3rd control |
| NH2-IWDSTDALELKEVPER-COOH             | * | PD 1st control | PD 2nd control PD 3rd control |
| NH2-KAPAEPQR-COOH                     | * |                | PD 2nd control                |
| NH2-KAPAEPQRYDAVLVAIGR-COOH           | * | PD 1st control | PD 2nd control PD 3rd control |
| NH2-KFNLM<Mox>LETK-COOH               | * | PD 1st control | PD 2nd control PD 3rd control |
| NH2-KFNLMLETK-COOH                    | * | PD 1st control | PD 2nd control PD 3rd control |
| NH2-LIFDK-COOH                        | * | PD 1st control | PD 2nd control PD 3rd control |
| NH2-LIFDKESHR-COOH                    | * | PD 1st control | PD 2nd control PD 3rd control |
| NH2-NLDAGKAGVEVDDRGFIR-COOH           | * | PD 1st control |                               |
| NH2-NLDAGK-COOH                       | * |                | PD 2nd control                |
| NH2-PIQLPFIPHEDPR-COOH                | * |                | PD 2nd control PD 3rd control |
| NH2-STEIKTQVVVLGAGPAGYSAAFR-COOH      | * |                | PD 3rd control                |
| NH2-TDIDKIR-COOH                      | * | PD 1st control | PD 3rd control                |
| NH2-TNVPHIFAIGDIVGQPM<Mox>LAHK-COOH   | * | PD 1st control | PD 2nd control PD 3rd control |
| NH2-TNVPHIFAIGDIVGQPMLAHK-COOH        | * | PD 1st control | PD 2nd control PD 3rd control |
| NH2-TQVVVLGAGPAGYSAAFR-COOH           | * | PD 1st control | PD 2nd control PD 3rd control |
| NH2-TVINFDNAIIAAGSR-COOH              | * | PD 1st control | PD 2nd control PD 3rd control |
| NH2-TVINFDNAIIAAGSRPIQLPFIPHEDPR-COOH | * | PD 1st control | PD 2nd control PD 3rd control |
| NH2-VIEEAKALAEHGIVFGEPK-COOH          | * | PD 1st control | PD 2nd control                |
| NH2-VINQLTGGLAGM<Mox>AK-COOH          | * | PD 1st control | PD 2nd control PD 3rd control |
| NH2-VINQLTGGLAGMAK-COOH               | * | PD 1st control | PD 2nd control PD 3rd control |
| NH2-VINQLTGGLAGMAKGR-COOH             | * |                | PD 3rd control                |
| NH2-VIPSIAYTEPEVAWVGLTEK-COOH         | * | PD 1st control | PD 2nd control PD 3rd control |
| NH2-VIPSIAYTEPEVAWVGLTEKEAK-COOH      | * | PD 1st control |                               |
| NH2-VTAVEAKEDGIYVTM<Mox>EGK-COOH      | * | PD 1st control | PD 2nd control PD 3rd control |
| NH2-VTAVEAKEDGIYVTM<Mox>EGKK-COOH     | * |                | PD 3rd control                |
| NH2-VTAVEAKEDGIYVTMEGK-COOH           | * | PD 1st control | PD 2nd control PD 3rd control |
| NH2-VTAVEAKEDGIYVTMEGKK-COOH          | * | PD 1st control | PD 2nd control PD 3rd control |
| NH2-VVNLGLGK-COOH                     | * | PD 1st control |                               |
| NH2-YDAVLVAIGR-COOH                   | * | PD 1st control | PD 2nd control PD 3rd control |

|                                         |                                                |
|-----------------------------------------|------------------------------------------------|
| NH2-YNTLGGVC<Cmm*>LNVGC<Cmm*>IP*        | PD 1st control PD 2nd control PD 3rd control   |
| NH2-AVLFLYLNR-COOH                      | *                                              |
| NH2-GEFNVPFGR-COOH                      | *                                              |
| NH2-HIPVLISNHDTMLTR-COOH                | *                                              |
| #Gln->pyro-Glu (N-term Q)#-QLLQELQESFC* | *                                              |
| NH2-AKQDYIEILGVSK-COOH                  | *                                              |
| NH2-FFDDLTR-COOH                        | *                                              |
| NH2-LAGEGEAGEHGAPAGDLYVQVQVK-CO*        | *                                              |
| NH2-QLLQELQESFGGPTGEHNSPR-COOH          | *                                              |
| NH2-VVETPVGLNER-COOH                    | *                                              |
| NH2-YNM<Mox>ELTLEEAVR-COOH              | *                                              |
| NH2-YNMELTLEEAVR-COOH                   | *                                              |
| #Gln->pyro-Glu (N-term Q)#-QAVTNPQNTI*  | *                                              |
| NH2-AKIELSSAQQTVDNLPYITADATGPK-CO*      | *                                              |
| NH2-AKLESLVEDLVNR-COOH                  | * PD 1st control PD 2nd control                |
| NH2-ASSGLNEDEIQK-COOH                   | *                                              |
| NH2-DAEANAEADRKFEELVQTR-COOH            | *                                              |
| NH2-DVSIM<Mox>PFK-COOH                  | *                                              |
| NH2-DVSIMPFK-COOH                       | *                                              |
| NH2-FQDEEVQR-COOH                       | *                                              |
| NH2-HSQVFSTAEDNQSAVTIHVLQGER-COO*       | PD 2nd control                                 |
| NH2-IELSSAQQTVDNLPYITADATGPK-COOH*      | PD 2nd control                                 |
| NH2-IIAADNGDAWVEVK-COOH                 | * PD 1st control                               |
| NH2-IIGIDLGTTNSC<Cmm*>VAIM<Mox>D*       | *                                              |
| NH2-IIGIDLGTTNSC<Cmm*>VAIMDGTTPR-       | *                                              |
| NH2-IINEPTAAALAYGLDK-COOH               | * PD 1st control PD 2nd control PD 3rd control |
| NH2-IINEPTAAALAYGLDKGTGNR-COOH          | * PD 1st control                               |
| NH2-KDVNPDEAVAIGA AVQGGVLTGDVK-C*       | PD 2nd control                                 |
| NH2-KFEELVQTR-COOH                      | *                                              |
| NH2-KVAEFFGKEPR-COOH                    | *                                              |
| NH2-LESLVEDLVNR-COOH                    | *                                              |
| NH2-LINYLVVEEFK-COOH                    | *                                              |
| NH2-LINYLVVEEFKK-COOH                   | PD 2nd control                                 |
| NH2-M<Mox>APPQISAEVLK-COOH              | *                                              |
| NH2-M<Mox>APPQISAEVLKK-COOH             | *                                              |
| NH2-MAPPQISAEVLK-COOH                   | *                                              |
| NH2-MAPPQISAEVLKK-COOH                  | *                                              |

|                                         |   |                |                               |
|-----------------------------------------|---|----------------|-------------------------------|
| NH2-NDPLAMQR-COOH                       | * | PD 1st control |                               |
| NH2-QAVTNPQNTLFAIK-COOH                 | * |                |                               |
| NH2-QAVTNPQNTLFAIKR-COOH                | * |                |                               |
| NH2-RIINEPTAAALAYGLDK-COOH              | * |                |                               |
| NH2-SIEPLKVALQDAGLSVSDIDDVILVGGQT       | * | PD 1st control |                               |
| NH2-SLGQFNLDGINPAPR-COOH                | * |                | PD 2nd control                |
| NH2-TAEDYLGEVPTEAVITVPAYFNDAQR-CC       | * |                | PD 2nd control                |
| NH2-TAIESALTALETALKGEDK-COOH            | * |                |                               |
| NH2-TFEVLATNGDTHLGGEDFDSR-COOH          | * |                | PD 2nd control                |
| NH2-TTPSIIAYTQDGETLVGQPAK-COOH          | * | PD 1st control | PD 2nd control                |
| NH2-TTPSIIAYTQDGETLVGQPAKR-COOH         | * |                | PD 2nd control                |
| NH2-VAEFFGKEPR-COOH                     | * |                |                               |
| NH2-VALQDAGLSVSDIDDVILVGGQTR-COO        | * | PD 1st control | PD 2nd control                |
| NH2-VLENAEGDRRTTPSIIAYTQDGETLVGQPA      | * | PD 1st control |                               |
| NH2-AHVGFIFTSK-COOH                     | * |                |                               |
| NH2-FFDIC<Cmm*>R-COOH                   | * |                |                               |
| NH2-GLPEGAEIAVQLEGER-COOH               | * |                |                               |
| NH2-KFFDIC<Cmm*>R-COOH                  | * |                |                               |
| NH2-LAVC<Cmm*>SM<Mox>PIGQSLPSHSV        | * |                |                               |
| NH2-LAVC<Cmm*>SMPIGQSLPSHSVIVPR-C       | * |                |                               |
| NH2-LIEATQFSM<Mox>AHQDVR-COOH           | * |                |                               |
| NH2-LIEATQFSMAHQDVR-COOH                | * |                |                               |
| NH2-LYVSENQLK-COOH                      | * |                |                               |
| NH2-M<Mox>LDGGDNPLR-COOH                | * |                |                               |
| NH2-VALVQPHEPGATTVPAR-COOH              | * |                |                               |
| NH2-YYLNGM<Mox>LFETEGEELR-COOH          | * |                |                               |
| NH2-YYLNGMLFETEGEELR-COOH               | * |                |                               |
| #Gln->pyro-Glu (N-term Q)#-QVIQFIDLSLIT | * |                |                               |
| NH2-AIGEAKDDDTADILTAASR-COOH            | * | PD 1st control | PD 2nd control PD 3rd control |
| NH2-ATNLLYTR-COOH                       | * |                | PD 2nd control                |
| NH2-ATVELLNR-COOH                       | * |                | PD 2nd control                |
| NH2-AVQLGGVALGTTQVINSK-COOH             | * | PD 1st control | PD 2nd control PD 3rd control |
| NH2-DDDTADILTAASR-COOH                  | * |                | PD 3rd control                |
| NH2-FLWFIESNIE-COOH                     | * |                | PD 2nd control                |
| NH2-GANFIHAVHEM<Mox>LDGFR-COOH          | * |                | PD 2nd control PD 3rd control |
| NH2-GANFIAVHEMLDGFR-COOH                | * |                | PD 2nd control                |
| NH2-KAIGEAKDDDTADILTAASR-COOH           | * |                |                               |



|                                    |   |                                              |
|------------------------------------|---|----------------------------------------------|
| NH2-KATVELLNR-COOH                 | * |                                              |
| NH2-QVIQFIDLITK-COOH               | * | PD 2nd control PD 3rd control                |
| NH2-SYPLDIHNVQDHLK-COOH            | * | PD 1st control                               |
| NH2-TALIDHLDTM<Mox>AER-COOH        | * | PD 2nd control                               |
| NH2-TALIDHLDTMAER-COOH             | * | PD 1st control PD 2nd control PD 3rd control |
| NH2-YAIVANDVR-COOH                 | * | PD 2nd control                               |
| NH2-YAIVANDVRK-COOH                | * |                                              |
| NH2-LPIVVYTPDNVDVK-COOH            | * | PD 2nd control                               |
| NH2-AGDIAAAIGLK-COOH               | * |                                              |
| NH2-AGPLAGYPVVDM<Mox>GIR-COOH      | * |                                              |
| NH2-AGPLAGYPVVDMGIR-COOH           | * |                                              |
| NH2-AKPVLLEPIM<Mox>K-COOH          | * |                                              |
| NH2-AKPVLLEPIMK-COOH               | * |                                              |
| NH2-ASYTM<Mox>EFLK-COOH            | * |                                              |
| NH2-ASYTMEFLK-COOH                 | * |                                              |
| NH2-DVTTGDTLC<Cmm*>DPDAPILER-COOH  | * |                                              |
| NH2-EFNVEANVGKPVAYR-COOH           | * |                                              |
| NH2-GGVIPGEYIPAVDK-COOH            | * |                                              |
| NH2-GITITSAATTAFWSGMAK-COOH        | * |                                              |
| NH2-GQYGHVVIDM<Mox>YPLEPGSNPK-COOH | * |                                              |
| NH2-GYEFINDIK-COOH                 | * |                                              |
| NH2-HASDDEPFSALAFK-COOH            | * |                                              |
| NH2-IATDPFVGNLTFFR-COOH            | * | PD 2nd control                               |
| NH2-IGEVDHGAATM<Mox>DWM<Mox>ECC    | * |                                              |
| NH2-IGEVDHGAATM<Mox>DWMEQEQR-      | * |                                              |
| NH2-IHAEVPLSEMFGYATQLR-COOH        | * |                                              |
| NH2-INIIDTPGHVDFTIEVER-COOH        | * |                                              |
| NH2-LGANPVPLQLAIGAEHFTGVVDLVK-COOH | * | PD 2nd control PD 3rd control                |
| NH2-M<Mox>EFPEPVISIAVEPK-COOH      | * |                                              |
| NH2-MEFPEPVISIAVEPK-COOH           | * |                                              |
| NH2-VEVETPEENTGDVIGDLSR-COOH       | * |                                              |
| NH2-VLNNEIILVTC<Cmm*>GSAFK-COOH    | * |                                              |
| NH2-VYSGVVNSGDTVLNSVK-COOH         | * |                                              |
| NH2-YDEAPSNVAQAVIEAR-COOH          | * |                                              |
| NH2-YLGGEELTEAEIK-COOH             | * |                                              |
| NH2-VPLFVQIGEVK-COOH               | * |                                              |
| NH2-ALTEANGDIELAIENMR-COOH         | * |                                              |

|                                        |   |                                              |
|----------------------------------------|---|----------------------------------------------|
| NH2-DAGFQAFADK-COOH                    | * |                                              |
| NH2-FEVGEGIEKVETDFAAEVAAM<Mox>SK       | * |                                              |
| NH2-FTGEVSLTGQPFVM<Mox>EPSK-COOH       | * | PD 2nd control                               |
| NH2-FTGEVSLTGQPFVMEPSK-COOH            | * | PD 2nd control                               |
| NH2-VAALEGDVLGSYQHGAR-COOH             | * |                                              |
| #Gln->pyro-Glu (N-term Q)#-QVGVPYIIVFL | * |                                              |
| NH2-AFDQIDNAPEEK-COOH                  | * |                                              |
| NH2-AGENVGVLLR-COOH                    | * | PD 2nd control PD 3rd control                |
| NH2-AIDKPFLLPIEDVFSISGR-COOH           | * | PD 2nd control PD 3rd control                |
| NH2-ALEGDAEWEAK-COOH                   | * | PD 2nd control PD 3rd control                |
| NH2-C<Cmm*>DM<Mox>VDDEELLELVEM<        | * |                                              |
| NH2-C<Cmm*>DM<Mox>VDDEELLELVEM         | * |                                              |
| NH2-C<Cmm*>DMVDDEELLELVEM<Mox>         | * |                                              |
| NH2-C<Cmm*>DMVDDEELLELVEMEVRCO         | * |                                              |
| NH2-EHILLGR-COOH                       | * |                                              |
| NH2-ELLSQYDFPGDDTPIVR-COOH             | * | PD 1st control PD 2nd control PD 3rd control |
| NH2-FESEVYILSK-COOH                    | * | PD 1st control PD 2nd control PD 3rd control |
| NH2-FESEVYILSKDEGGR-COOH               | * |                                              |
| NH2-GITINTSHVEYDTPTR-COOH              | * | PD 3rd control                               |
| NH2-GQVLAKPGTIKPHTK-COOH               | * |                                              |
| NH2-GYRPQFYFR-COOH                     | * | PD 2nd control PD 3rd control                |
| NH2-HYAHVDC<Cmm*>PGHADYVK-COOH         | * |                                              |
| NH2-ILELAGFLDSYIPEPER-COOH             | * | PD 1st control PD 2nd control PD 3rd control |
| NH2-M<Mox>VVTLIHPIAM<Mox>DDGLR-C       | * | PD 2nd control PD 3rd control                |
| NH2-M<Mox>VVTLIHPIAMDDGLR-COOH         | * | PD 2nd control PD 3rd control                |
| NH2-MVVTLIHPIAM<Mox>DDGLR-COOH         | * | PD 2nd control                               |
| NH2-MVVTLIHPIAMDDGLR-COOH              | * |                                              |
| NH2-NM<Mox>ITGAAQM<Mox>DGAILVVA        | * | PD 2nd control                               |
| NH2-NM<Mox>ITGAAQM<Mox>DGAILVVA        | * | PD 2nd control                               |
| NH2-NM<Mox>ITGAAQMDGAILVVAATDGI        | * |                                              |
| NH2-NM<Mox>ITGAAQMDGAILVVAATDGI        | * |                                              |
| NH2-NMITGAAQM<Mox>DGAILVVAATDGI        | * |                                              |
| NH2-NMITGAAQMDGAILVVAATDGPM<M          | * |                                              |
| NH2-NMITGAAQMDGAILVVAATDGPMPQT         | * |                                              |
| NH2-QVGVPYIIVFLNK-COOH                 | * | PD 1st control PD 2nd control PD 3rd control |
| NH2-STC<Cmm*>TGVEM<Mox>FR-COOH         | * |                                              |
| NH2-STC<Cmm*>TGVEMFR-COOH              | * |                                              |

|                                  |   |                                              |
|----------------------------------|---|----------------------------------------------|
| NH2-TKPHVNVGTIGHVDHGK-COOH       | * |                                              |
| NH2-TTDVTGTIELPEGVEM<Mox>VM<Mox> | * | PD 2nd control                               |
| NH2-TTDVTGTIELPEGVEM<Mox>VMPGDN  | * | PD 2nd control                               |
| NH2-TTDVTGTIELPEGVEMVM<Mox>PGDN  | * | PD 2nd control                               |
| NH2-TTDVTGTIELPEGVEMVMPGDNIK-COC | * | PD 2nd control PD 3rd control                |
| NH2-TTLTAAITTVLAK-COOH           | * | PD 2nd control PD 3rd control                |
| NH2-TTLTAAITTVLAKTYGGAAR-COOH    | * |                                              |
| NH2-VGEEVEIVGIK-COOH             | * | PD 1st control PD 2nd control PD 3rd control |
| NH2-VGEEVEIVGIKETQK-COOH         | * | PD 3rd control                               |
| NH2-HLPSDTGIEVAFAGR-COOH         | * |                                              |
| NH2-QSLQGLVVLM<Mox>DIR-COOH      | * |                                              |
| NH2-SSALNTLTNQK-COOH             | * |                                              |
| NH2-TNLNYQQTHFVMSAPDIR-COOH      | * |                                              |
| NH2-TQLINLFEVADGKR-COOH          | * |                                              |
| NH2-LDQLAEIVK-COOH               | * | PD 2nd control PD 3rd control                |
| NH2-STLFNALTK-COOH               | * |                                              |
| NH2-AFTSEEFTHFLEELTK-COOH        | * | PD 1st control PD 2nd control                |
| NH2-AKGM<Mox>NTAVGDEGGYAPNLGSN   | * |                                              |
| NH2-AVAAVNGPIAQUALIGK-COOH       | * | PD 2nd control PD 3rd control                |
| NH2-DAGYTAVISHR-COOH             | * |                                              |
| NH2-DAKDQAGIDKIM<Mox>IDLDGTENK-C | * |                                              |
| NH2-DITLAM<Mox>DC<Cmm*>AASEFYK-C | * | PD 2nd control                               |
| NH2-DITLAMDC<Cmm*>AASEFYK-COOH   | * | PD 2nd control                               |
| NH2-DQAGIDKIM<Mox>IDLDGTENK-COOH | * |                                              |
| NH2-FGANAILAVSLANAK-COOH         | * | PD 2nd control                               |
| NH2-FNQIGSLTETLAAIK-COOH         | * | PD 2nd control                               |
| NH2-GIANSILIK-COOH               | * | PD 2nd control                               |
| NH2-GM<Mox>NTAVGDEGGYAPNLGSNAE   | * | PD 2nd control                               |
| NH2-GMNTAVGDEGGYAPNLGSNAEALAVIA  | * | PD 2nd control                               |
| NH2-GNPTVEAEVHLEGGFVGM<Mox>AAAF  | * | PD 2nd control                               |
| NH2-GNPTVEAEVHLEGGFVGMAAAPSGAST  | * | PD 2nd control                               |
| NH2-IQLVGDDLFTNTK-COOH           | * | PD 2nd control                               |
| NH2-QYPIVSIEDGLDESDWDGFAYQTK-COO | * |                                              |
| NH2-SGETEDATIADLAVGTAAGQIK-COOH  | * | PD 2nd control                               |
| NH2-VLGDKIQLVGDDLFTNTK-COOH      | * | PD 1st control PD 2nd control                |
| NH2-LIMGLADGEVLVDGR-COOH         | * | PD 2nd control                               |
| NH2-AVITGLGIVSSIGNNQEVLASLR-COOH | * |                                              |

|                                   |                  |                               |
|-----------------------------------|------------------|-------------------------------|
| NH2-AC<Cmm*>EEAAEGQVVSPVNFNSPGC*  |                  | PD 2nd control                |
| NH2-SVEYMAAQGVEHLYEVGPGK-COOH     | * PD 1st control |                               |
| NH2-DAGIEASQIGYVNAHGTSTPAGDKAEAC* |                  |                               |
| NH2-FDGFVHSIGFAPGDQLDGDYVNAVTR-C* |                  |                               |
| NH2-FPFLLVDR-COOH                 | * PD 1st control |                               |
| NH2-LEPGELYYFAGIDEAR-COOH         | *                |                               |
| NH2-SVGKLEPGELYYFAGIDEAR-COOH     | *                |                               |
| NH2-TTNTHTLQIEEILELLPHR-COOH      | *                |                               |
| NH2-LFALDK-COOH                   | *                |                               |
| NH2-YFATGAATPGAANADATFK-COOH      | *                |                               |
| NH2-QFNNIGATTPVVPFR-COOH          | *                |                               |
| NH2-AGSLIAVLILR-COOH              | *                |                               |
| NH2-YSGSSYPFPTTSETPR-COOH         | *                |                               |
| NH2-AALMMGINR-COOH                | *                |                               |
| NH2-VNSDVLTVSTVNSQDQVTQKPLR-COOH* |                  |                               |
| NH2-LIDGTVFDSSVAR-COOH            | *                |                               |
| NH2-AITGIFFGSDTGNTENIAK-COOH      | *                | PD 2nd control                |
| NH2-AYVGVDPVKEPIPVRPTAHYTMGGIETD* |                  | PD 2nd control                |
| NH2-YLQDYGMGPETPLGEPK-COOH        | *                | PD 2nd control                |
| NH2-AISDLVADGVLIR-COOH            | *                |                               |
| NH2-IAFDQNDKPVHVSELC<Cmm*>R-COC*  |                  |                               |
| NH2-VENALLTVSGFTDFGVSQGK-COOH     | *                |                               |
| NH2-LFDYLTDTGNLPR-COOH            | *                | PD 2nd control                |
| NH2-SGEGLYFIDKELSTLDTQN-COOH      | *                |                               |
| NH2-LM<Mox>SALGVR-COOH            | * PD 1st control |                               |
| NH2-GISLLDAFGAANDVLK-COOH         | *                | PD 2nd control                |
| NH2-HVDSLITIPNDK-COOH             | *                |                               |
| NH2-IEGVEFFAVNTDAQALRK-COOH       | *                |                               |
| NH2-MAFAEQGITELSK-COOH            | * PD 1st control |                               |
| NH2-TAVGQTIQIGSGITK-COOH          | * PD 1st control |                               |
| NH2-TPAGYPSGSLGPTTAGR-COOH        | *                |                               |
| NH2-AGIALNDNFVK-COOH              | *                | PD 2nd control PD 3rd control |
| NH2-DNTPM<Mox>FVK-COOH            | *                |                               |
| NH2-FDGTVEVKDGHVINGK-COOH         | *                |                               |
| NH2-GANFDKYAGQDIVSNASC<Cmm*>TTN*  |                  | PD 2nd control                |
| NH2-GASQNIIPSSTGAAK-COOH          | *                |                               |
| NH2-GVLGYTEDDVVSTDFNGEVC<Cmm*>T*  |                  |                               |

|                                   |   |                |                               |
|-----------------------------------|---|----------------|-------------------------------|
| NH2-KVVM<Mox>TGPSKDNTPMFVK-COOH   | * |                |                               |
| NH2-LVSWYDNETGYSNK-COOH           | * | PD 1st control | PD 2nd control PD 3rd control |
| NH2-VINDNFGIIEGLM<Mox>TTVHATTATQ  | * | PD 1st control | PD 2nd control PD 3rd control |
| NH2-VINDNFGIIEGLMTTVHATTATQK-COOH | * |                | PD 3rd control                |
| NH2-VLDLIAHISK-COOH               | * | PD 1st control | PD 2nd control                |
| NH2-VPTPNVSVVDLTVR-COOH           | * |                | PD 2nd control PD 3rd control |
| NH2-VPTPNVSVVDLTVRLEK-COOH        | * |                |                               |
| NH2-VTAERDPANLK-COOH              | * |                |                               |
| NH2-YAGQDIVSNASC<Cmm*>TTNC<Cmm*   | * |                | PD 2nd control                |
| NH2-AGQMR-COOH                    | * |                |                               |
| NH2-ETVLNLLALR-COOH               | * |                |                               |
| NH2-HFDEM<Mox>KDVTIADLFAK-COOH    | * |                | PD 2nd control                |
| NH2-LLSNFFAQTEALAFGK-COOH         | * |                | PD 2nd control                |
| NH2-SNTPILVDGKDVMPEVNAVLEK-COOH   | * |                |                               |
| NH2-TFSEAIISGEWK-COOH             | * |                | PD 2nd control                |
| NH2-VNPETTLFLVASK-COOH            | * |                | PD 2nd control                |
| NH2-ANTGVTLEPINSQNAPK-COOH        | * |                | PD 3rd control                |
| NH2-NLLPAAFAK-COOH                | * | PD 1st control |                               |
| NH2-C<Cmm*>VENFVFVSR-COOH         | * |                |                               |
| NH2-DIPVFQEVAQLSQNK-COOH          | * |                |                               |
| NH2-DSAASIVAQGNFYGTDR-COOH        | * |                |                               |
| NH2-DTLSLFLPMLK-COOH              | * |                |                               |
| NH2-EFAEATGIDSLAVAIGTAHGMYASAPAL  | * |                |                               |
| NH2-QWVNLPLVLHGASGLSTK-COOH       | * |                |                               |
| NH2-AAVLC<Cmm*>FAAESVATDC<Cmm*>   | * |                |                               |
| NH2-EFVFTIADK-COOH                | * |                |                               |
| NH2-TGFNDSLDIR-COOH               | * |                |                               |
| NH2-VGPALTFALR-COOH               | * |                |                               |
| NH2-LTDILAAGLQK-COOH              | * |                |                               |
| NH2-SDILNAVGITLDETTTR-COOH        | * |                |                               |
| NH2-AVFALGAGVDSILSK-COOH          | * |                |                               |
| NH2-AM<Mox>LAAEQHVVTPALER-COOH    | * |                |                               |
| NH2-AMLAAEQHVVTPALER-COOH         | * |                |                               |
| NH2-C<Cmm*>TQAALALAELC<Cmm*>YNT   | * |                |                               |
| NH2-DAGLVVEIAPFGGEC<Cmm*>SQNEIDF  | * |                |                               |
| NH2-FLQEWEE-COOH                  | * |                |                               |
| NH2-FVLGFAQSTVEK-COOH             | * |                |                               |

|                                   |   |                |
|-----------------------------------|---|----------------|
| NH2-GIAETAQC<Cmm*>GAILGIGGGK-COOH | * |                |
| NH2-IVAEAAC<Cmm*>AEGETIHNMPGGAT   | * |                |
| NH2-LGEYLKPLAER-COOH              | * |                |
| NH2-LLAAGIGDALATWFEAR-COOH        | * |                |
| NH2-SFKDAGLVVEIAPFGGEC<Cmm*>SQNE  | * |                |
| NH2-WLVVGDK-COOH                  | * |                |
| NH2-WLVVGDKFVLGFAQSTVEK-COOH      | * |                |
| NH2-YIQGADVIR-COOH                | * |                |
| NH2-YLLLPNNPNM<Mox>VIVDTK-COOH    | * |                |
| NH2-YLLLPNNPNMVIVDTK-COOH         | * |                |
| NH2-VGDEPYYPVNDNK-COOH            | * |                |
| NH2-LALC<Cmm*>DIASGEISQAK-COOH    | * |                |
| NH2-AGGVFTDEAIDAYIALR-COOH        | * |                |
| NH2-AINALANPTTNSYK-COOH           | * |                |
| NH2-EIPQVAGSLEEALNELDLDFLFLK-COOH | * |                |
| NH2-GGYFPVPPVDSAQDIR-COOH         | * |                |
| NH2-GKEQHVTIPAHQVNAEFFEFGK-COOH   | * |                |
| NH2-LVPGYEAPVMLAYSAR-COOH         | * |                |
| NH2-SAEHVLTMLNEHEVK-COOH          | * |                |
| NH2-LVVATDTAFVPFEFK-COOH          | * |                |
| NH2-DLIVIGGGINGAGIAADAAGR-COOH    | * |                |
| NH2-DYTLDIHDENGKAPLLSVFGGK-COOH   | * |                |
| NH2-ESVLPGGAIEGDRDDYAAR-COOH      | * |                |
| NH2-FGANSVLKPEIK-COOH             | * |                |
| NH2-GLSVLMLEAQDLAC<Cmm*>ATSSASSK  | * |                |
| NH2-GLVNATGPWVK-COOH              | * |                |
| NH2-IEESEINYLLNVYNTHFK-COOH       | * |                |
| NH2-LTPYYQGIGPAWTK-COOH           | * |                |
| NH2-LVLANAQM<Mox>VVR-COOH         | * |                |
| NH2-LVLANAQMVVR-COOH              | * |                |
| NH2-LVSEALAER-COOH                | * |                |
| NH2-RYPFLTESLAR-COOH              | * | PD 1st control |
| NH2-TYGSNSELLGNAGTVSDLGEDFGHEFYF  | * |                |
| NH2-VSQWLVEYTQQR-COOH             | * | PD 1st control |
| NH2-YLEHYEFR-COOH                 | * |                |
| NH2-YLVDHEWVR-COOH                | * |                |
| NH2-YPFLTESLAR-COOH               | * |                |

|                                    |   |                |                |
|------------------------------------|---|----------------|----------------|
| NH2-LINDAYDSEYFATK-COOH            | * | PD 1st control |                |
| NH2-VDGGAVANNFLMQFQSDILGTR-COOH    | * | PD 1st control |                |
| NH2-LLLPR-COOH                     | * |                | PD 3rd control |
| NH2-QTQINLLSSM<Mox>AI-COOH         | * | PD 2nd control |                |
| NH2-SAFDEFSTPAAR-COOH              | * |                |                |
| NH2-SPAIEEWLR-COOH                 | * | PD 2nd control |                |
| NH2-QIAENPILLYMK-COOH              | * |                |                |
| NH2-LYNIVPYGIDATGHIDYADLEK-COOH    | * | PD 2nd control |                |
| NH2-VRQEEHIELIASENYTSR-COOH        | * |                |                |
| NH2-VVSGGTDNHLFLVDLVDK-COOH        | * | PD 2nd control |                |
| NH2-VVSGGTDNHLFLVDLVDKNLTGK-COOH   | * |                |                |
| NH2-AIGVLLPSLTNQVFAEVLR-COOH       | * |                |                |
| NH2-FLRNPEQVSVALR-COOH             | * |                |                |
| NH2-IAAALDELGYIPNRAPDILSNATSR-COOH | * |                |                |
| NH2-IAAALDELGYIPNR-COOH            | * |                |                |
| NH2-KRPVLQDVADR-COOH               | * |                |                |
| NH2-LASVLTTPR-COOH                 | * | PD 1st control |                |
| NH2-M<Mox>IEVAGIPVVELM<Mox>DSK-C   | * |                |                |
| NH2-M<Mox>IEVAGIPVVELMDSK-COOH     | * |                |                |
| NH2-M<Mox>LDLGFTLSPGGSI-COOH       | * |                |                |
| NH2-MIEVAGIPVVELM<Mox>DSK-COOH     | * |                |                |
| NH2-MIEVAGIPVVELMDSK-COOH          | * |                |                |
| NH2-MLDLGFTLSPGGSI-COOH            | * |                |                |
| NH2-SPC<Cmm*>LDIAVGFDNFEAAR-COOH   | * |                |                |
| NH2-VPDDM<Mox>AIAGFHGHDIGQVM<M     | * |                |                |
| NH2-ELPLTESLALTIDR-COOH            | * |                | PD 3rd control |
| NH2-VIPYWNETILPR-COOH              | * |                | PD 3rd control |
| NH2-YYLGNADIEIAAK-COOH             | * | PD 1st control | PD 3rd control |
| NH2-AFFANPVLGTGAVDK-COOH           | * |                | PD 2nd control |
| NH2-AFVNADFDGFAR-COOH              | * |                | PD 2nd control |
| NH2-AYDLLTLAQGEFQADTAVAGLQAAYAR-   | * |                |                |
| NH2-VATYDLQPEMSSAELTEK-COOH        | * | PD 2nd control |                |
| NH2-AANDDLLNSFWLLDSEK-COOH         | * |                |                |
| NH2-AANDDLLNSFWLLDSEKGEAR-COOH     | * |                |                |
| NH2-AGYAEDEVVAVSK-COOH             | * |                | PD 3rd control |
| NH2-EVPVEVKPEVR-COOH               | * |                |                |
| NH2-LGDIEYR-COOH                   | * |                |                |

|                                  |   |                |                |
|----------------------------------|---|----------------|----------------|
| NH2-ANPDMSAMVEGIELTLK-COOH       | * |                |                |
| NH2-FINELLPVIDSLDR-COOH          | * |                |                |
| NH2-VANLEAQLAEQTR-COOH           | * | PD 1st control | PD 3rd control |
| NH2-ETIIVHEIPYQVNK-COOH          | * |                |                |
| NH2-ITAILPVTEFEEGVK-COOH         | * |                |                |
| NH2-LGEGDKVVSLIVPR-COOH          | * |                |                |
| NH2-FDVHTNAEQNLFEPIVR-COOH       | * |                |                |
| NH2-TLLLTFFYR-COOH               | * |                |                |
| NH2-ILVIAADER-COOH               | * |                |                |
| NH2-KLLTGDSPFAANALGK-COOH        | * |                |                |
| NH2-LLTGDSPFAANALGK-COOH         | * | PD 1st control |                |
| NH2-MGMNIINDDITGR-COOH           | * |                |                |
| NH2-LYQNQDAHTGLQFEAR-COOH        | * |                |                |
| NH2-PLYAIWLQNSDK-COOH            | * |                |                |
| NH2-QLDLLITTEAPK-COOH            | * |                |                |
| NH2-AENAVDFSGLIHQAVILEK-COOH     | * |                |                |
| NH2-AVTLLDESQLDALLDK-COOH        | * |                |                |
| NH2-AVVNGEHSLLVLAGAGSGK-COOH     | * |                |                |
| NH2-ENSPFVEILK-COOH              | * |                |                |
| NH2-FSGAQM<Mox>SLTTAFHENFGEGER-C | * |                |                |
| NH2-GEASPEQILLAFGR-COOH          | * |                |                |
| NH2-GLVWGELEFVLPDEK-COOH         | * |                |                |
| NH2-QALSALPLPVNR-COOH            | * |                |                |
| NH2-QQLDLIATR-COOH               | * |                |                |
| NH2-AKGQSLQDPFLNALR-COOH         | * |                |                |
| NH2-ERVPVSIYLVNGIK-COOH          | * |                |                |
| NH2-GQSLQDPFLNALR-COOH           | * |                | PD 2nd control |
| NH2-LQGQIESFDQFVILLK-COOH        | * |                |                |
| NH2-NTVSQMVK-COOH                | * |                |                |
| NH2-VPVSIYLVNGIK-COOH            | * |                | PD 2nd control |
| NH2-FGFVLPMDDEC<Cmm*>LAR-COOH    | * |                |                |
| NH2-LAFEPGVIPELLK-COOH           | * |                |                |
| NH2-AESFQAVADATLAYHK-COOH        | * |                |                |
| NH2-EIPFLYASSAATYGGR-COOH        | * | PD 1st control | PD 2nd control |
| NH2-EYEKPLNVYGYSK-COOH           | * |                |                |
| NH2-FLFDEYVR-COOH                | * | PD 1st control | PD 2nd control |
| NH2-GITDILVVDNLK-COOH            | * |                |                |



|                                   |   |                |
|-----------------------------------|---|----------------|
| NH2-M<Mox>IIVTGGAGFIGSNIVK-COOH   | * |                |
| NH2-MIIVTGGAGFIGSNIVK-COOH        | * | PD 2nd control |
| NH2-QILPEANSQIVGFR-COOH           | * | PD 1st control |
| NH2-TVAEGVTEYMAWLNR-COOH          | * |                |
| NH2-YFNVYGPR-COOH                 | * |                |
| NH2-YMMDNNYQYSK-COOH              | * |                |
| NH2-YQAFTQADLTNLR-COOH            | * | PD 1st control |
| NH2-SYIDYEEGK-COOH                | * |                |
| NH2-EM<Mox>LIADGIDPNELLNSLAAVK-CC | * |                |
| NH2-SLDDFLIKQ-COOH                | * |                |
| NH2-AELNDTVVDIAK-COOH             | * |                |
| NH2-AWPALVDER-COOH                | * |                |
| NH2-EAARPEITYPDNLPVSQK-COOH       | * |                |
| NH2-EAM<Mox>IITSALSIQDPR-COOH     | * |                |
| NH2-EAMIITSALSIQDPR-COOH          | * |                |
| NH2-ELGIPVNSEPAEYR-COOH           | * |                |
| NH2-ELVIALIK-COOH                 | * |                |
| NH2-ETPDLLNFEK-COOH               | * |                |
| NH2-FSIFPGSGLFK-COOH              | * |                |
| NH2-HALVEGDWQTR-COOH              | * |                |
| NH2-HFNNAPIIEVSGR-COOH            | * |                |
| NH2-HTEILPLYAR-COOH               | * |                |
| NH2-IAEELKTEPGGC<Cmm*>IGYK-COOH   | * |                |
| NH2-IIITSATIDPER-COOH             | * |                |
| NH2-ILQAMEQISG-COOH               | * |                |
| NH2-IVLATNVAETSLTVPGIK-COOH       | * |                |
| NH2-LFDNPLEQK-COOH                | * |                |
| NH2-LGLYFNPYGK-COOH               | * |                |
| NH2-LIDANGGPVWTEEGFAALHEK-COOH    | * |                |
| NH2-LLEELGAIITDEQASAYK-COOH       | * |                |
| NH2-LLLLNIPIK-COOH                | * |                |
| NH2-LLM<Mox>QYDTIIIIDEAHER-COOH   | * |                |
| NH2-LLMQYDTIIIIDEAHER-COOH        | * |                |
| NH2-LM<Mox>TDGILLAEIQQDR-COOH     | * |                |
| NH2-LMTDGILLAEIQQDR-COOH          | * |                |
| NH2-LPIEPISQASANQR-COOH           | * |                |
| NH2-LTFTALQQR-COOH                | * |                |

NH2-LYSEDDFLSRPEFTDPEILR-COOH \*

NH2-NFVPAPNYAEAFGLGR-COOH \*

NH2-NPDAQQAIFQEM<Mox>AK-COOH \*

NH2-NPDAQQAIFQEMAK-COOH \*

NH2-QVEQILTAVFNINK-COOH \*

NH2-QVEQILTAVFNINKR-COOH \*

NH2-SLNIDFLLGYLK-COOH \*

NH2-SLQDLKDALK-COOH \*

NH2-TDYLNLYR-COOH \*

NH2-VDM<Mox>TM<Mox>ALGLSDIK-COOH \*

NH2-VDMTM<Mox>ALGLSDIK-COOH \*

NH2-VDMTMALGLSDIK-COOH \*

NH2-VENVQQAWQQWINK-COOH \*

NH2-VKPLELPLLDSSLER-COOH \*

NH2-VLELIDDC<Cmm\*>ISC<Cmm\*>GVDK- \*

NH2-VRAELNDTVVDIAK-COOH \*

NH2-VREWQDIYTQLR-COOH \*

NH2-VSYFAQQLGTPYPISDKR-COOH \*

NH2-VTVYGLPIVAAR-COOH \*

NH2-WM<Mox>IEELR-COOH \*

NH2-WMIEELR-COOH \*

NH2-WVM<Mox>VAELVETSR-COOH \*

NH2-VEAAR-COOH \*

NH2-YLFENFAVR-COOH \*

NH2-KLNALTMPHPDR-COOH \*

NH2-LDKWLWAAR-COOH \*

NH2-RPASEAALLYEETAESVEK-COOH \*

NH2-RPASEAALLYEETAESVEKR-COOH \*

NH2-EIVSELDKHIIGQDNAK-COOH \*

NH2-HLDALVADEDLSR-COOH \*

NH2-IAEAAWQVNESTENIGAR-COOH \*

NH2-ILDVLIPPAK-COOH \*

NH2-ILTEPNASITVQYK-COOH \*

NH2-QDAIDAVEQHGIVFIDEIDK-COOH \*

NH2-ALSNPDLYEGDGELR-COOH \*

NH2-EGPAEDFANQEAIK-COOH \*

NH2-GTLEDPNLFIR-COOH \*

NH2-NKSEITDEEYKEYFK-COOH \*

NH2-AFLAQLSEEQVTK-COOH \*

NH2-KPAVATAPATGQVQSLTR-COOH \*

NH2-LLTTM<Mox>QQQGFVR-COOH \*

NH2-NLLAIVHPILR-COOH \*

NH2-AAIEYAIANDRDSVTLVHK-COOH \*

NH2-EEFGGELIDGGPWLK-COOH \*

NH2-STQVYGQDVWLPAETLDLIR-COOH \*

NH2-AKEDNIEM<Mox>QGTVLETLPNTM<Mox>FR-COOH \*

NH2-AKEDNIEM<Mox>QGTVLETLPNTMFR-COOH \*

NH2-AKEDNIEMQGTVLETLPNTM<Mox>FR-COOH \*

NH2-AKEDNIEMQGTVLETLPNTMFR-COOH \*

NH2-ILTGDKVTVELTPYDLSK-COOH \*

NH2-VELENGHVVTAHISGK-COOH \*

NH2-VTVELTPYDLSK-COOH \*

#Gln->pyro-Glu (N-term Q)#-QQIIGLAEVR-COOH \*

NH2-AAM<Mox>SGM<Mox>LSPELK-COOH \*

NH2-AAMSGM<Mox>LSPELK-COOH \*

NH2-AAMSGMLSPELK-COOH \*

NH2-AAQVPVVAVNK-COOH \*

NH2-AAQVPVVAVNKIDKPEADPDR-COOH \*

NH2-ADVQGSVEAISDLLK-COOH \*

NH2-APVVTIM<Mox>GHVDHGK-COOH \*

NH2-APVVTIMGHVDHGK-COOH \*

NH2-DNVVIYEGEESLR-COOH \*

NH2-DNVVIYEGEESLRR-COOH \*

NH2-DVVIGETITVGELANK-COOH \*

NH2-ENELEEAVM<Mox>SDR-COOH \*

NH2-ENELEEAVM<Mox>SDRDTGAAAEPK-COOH \*

NH2-ENELEEAVMSDR-COOH \*

NH2-ENELEEAVMSDRDTGAAAEPK-COOH \*

NH2-FGAIAGC<Cmm\*>M<Mox>VTEGVVK-COOH \*

NH2-FGAIAGC<Cmm\*>M<Mox>VTEGVVK-COOH \*

NH2-FGAIAGC<Cmm\*>MVTEGVVK-COOH \*

NH2-FGAIAGC<Cmm\*>MVTEGVVK-COOH \*

NH2-FKDDVNEVR-COOH \*

NH2-GAQATDIVVLVAADDGVM<Mox>PQ-COOH \*

NH2-GAQATDIVVLVVAADDGVMPQTIEAIQI\*  
NH2-GDIVLC<Cmm\*>GFEYGR-COOH\*  
NH2-GM<Mox>ASGAVIESFLDK-COOH\*  
NH2-GM<Mox>ASGAVIESFLDKGR-COOH\*  
NH2-GMASGAVIESFLDK-COOH\*  
NH2-GMASGAVIESFLDKGR-COOH\*  
NH2-GPVATVLVR-COOH\*  
NH2-GSSLQQGFQKPAQAVNR-COOH\*  
NH2-IIGSGVGGITETDATLAAASNAILVGFNVF\*  
NH2-KGM<Mox>ASGAVIESFLDK-COOH\*  
NH2-KGM<Mox>ASGAVIESFLDKGR-COOH\*  
NH2-KGMASGAVIESFLDK-COOH\*  
NH2-KGMASGAVIESFLDKGR-COOH\*  
NH2-KGSSLQQGFQKPAQAVNR-COOH\*  
NH2-KVIEAESDLR-COOH\*  
NH2-LAAEEQAQR-COOH\*  
NH2-LAAEEQAQREAEQAR-COOH\*  
NH2-LENM<Mox>FANM<Mox>TEGEVHEV\*  
NH2-LGAM<Mox>ATINQVIDQETAQLVAEEM\*  
NH2-LGAM<Mox>ATINQVIDQETAQLVAEEM\*  
NH2-LGAMATINQVIDQETAQLVAEEM<Mox>\*  
NH2-LGAMATINQVIDQETAQLVAEEMGHK-\*  
NH2-LVQQFADAGIR-COOH\*  
NH2-M<Mox>AEENKWTDNAEPTEDSSDYH\*  
NH2-MAEENKWTDNAEPTEDSSDYHVTTSQH\*  
NH2-NELGQEVLEAGPSIPVEILGLSGVPAAGD\*  
NH2-NELGQEVLEAGPSIPVEILGLSGVPAAGD\*  
NH2-NELSQYGILPEEWGGESQFVHVS AK-CO\*  
NH2-NGMEC<Cmm\*>GIGVK-COOH\*  
NH2-QQIIGLAEVR-COOH\*  
NH2-RENELEEAVM<Mox>SDRDTGAAAEP\*  
NH2-RM<Mox>AEENKWTDNAEPTEDSSDYH\*  
NH2-RMAEENKWTDNAEPTEDSSDYHVTTSC\*  
NH2-SKLENM<Mox>FANM<Mox>TEGEVHE\*  
NH2-SKLENM<Mox>FANMTEGEVHEVNIVL\*  
NH2-SKLENMFANM<Mox>TEGEVHEVNIVL\*  
NH2-SKLENMFANMTEGEVHEVNIVLK-COOH\*

NH2-TGDVIEVFEIIEIQR-COOH \*  
 NH2-TSLLDYIR-COOH \*  
 NH2-VIEAESDLR-COOH \*  
 NH2-VKNELSQYGILPEEWGGESQFVHVSAK-( \*  
 NH2-WTDNAEPTEDSSDYHVTTSQHAR-COO \*  
 NH2-YYSVIYNLIDEVK-COOH \*  
 #Gln->pyro-Glu (N-term Q)#-QMIMVLAPK- \*  
 NH2-AEEAGVDLVEISPNAEPPVC<Cmm\*>R- \*  
 NH2-DDLQELAVVESFPTK-COOH \*  
 NH2-DDLQELAVVESFPTKIEGR-COOH \*  
 NH2-EALEKAAEEAGVDLVEISPNAEPPVC<Cmr \*  
 NH2-EM<Mox>AHQQIGM<Mox>EVLNR-CC \*  
 NH2-EM<Mox>AHQQIGMEVLNR-COOH \*  
 NH2-EMAHQQIGM<Mox>EVLNR-COOH \*  
 NH2-EMAHQQIGMEVLNR-COOH \*  
 NH2-FLEEGDKAK-COOH \*  
 NH2-FLYEK-COOH \*  
 NH2-FRPGTDEGDYQVK-COOH \*  
 NH2-GREM<Mox>AHQQIGM<Mox>EVLNR \*  
 NH2-GREM<Mox>AHQQIGMEVLNR-COOH \*  
 NH2-GREMAHQQIGM<Mox>EVLNR-COOH \*  
 NH2-GREMAHQQIGMEVLNR-COOH \*  
 NH2-IM<Mox>DYGK-COOH \*  
 NH2-IMDYGK-COOH \*  
 NH2-LTGLEGEQLGIVSLR-COOH \*  
 NH2-QM<Mox>IM<Mox>VLAPK-COOH \*  
 NH2-QM<Mox>IMVLAPK-COOH \*  
 NH2-QMIM<Mox>VLAPK-COOH \*  
 NH2-QMIMVLAPK-COOH \*  
 NH2-VKDDLQELAVVESFPTK-COOH \*  
 NH2-VKDDLQELAVVESFPTKIEGR-COOH \*  
 NH2-AEM<Mox>SEYLFDK-COOH \*  
 NH2-AEMSEYLFDK-COOH \*  
 NH2-AEMSEYLFDKLGLSK-COOH \*  
 NH2-ELVELFFEEIR-COOH \*  
 NH2-ELVELFFEEIRR-COOH \*  
 NH2-LSGFGNFDLR-COOH \*

PD 2nd control

PD 1st control PD 2nd control

|                                       |   |                |                |
|---------------------------------------|---|----------------|----------------|
| NH2-TGEDIPITAR-COOH                   | * |                |                |
| NH2-EMLEHMASTLAQGER-COOH              | * |                |                |
| NH2-GFGSFLHYR-COOH                    | * |                |                |
| NH2-TVEDAVKEM<Mox>LEHM<Mox>ASTL       | * |                |                |
| NH2-TVEDAVKEM<Mox>LEHMASTLAQGER       | * |                |                |
| NH2-TVEDAVKEMLEHMASTLAQGER-COOH       | * |                |                |
| NH2-ALATFSGSIVSLIATK-COOH             | * |                |                |
| NH2-IITIDASVMK-COOH                   | * |                |                |
| NH2-LLDGNGLYLYVPVSGK-COOH             | * |                |                |
| NH2-NFPFLPADQIPAFNK-COOH              | * |                |                |
| NH2-EYDHIKDVNDLPELLK-COOH             | * |                |                |
| NH2-ALGLNDELAHSSIR-COOH               | * |                |                |
| NH2-EIVFTSGATESDNLAIK-COOH            | * |                |                |
| NH2-IYGPK-COOH                        | * |                |                |
| NH2-LPIDLSQLK-COOH                    | * |                |                |
| NH2-NQIADLVGADPR-COOH                 | * | PD 1st control |                |
| NH2-LVTDELVIALVK-COOH                 | * |                | PD 2nd control |
| #Gln->pyro-Glu (N-term Q)#-QATAALTALS | * | PD 1st control |                |
| NH2-DALFQSDAFVNK-COOH                 | * | PD 1st control |                |
| NH2-IADLRLEQFEVNQQR-COOH              | * | PD 1st control |                |
| NH2-IGDVTIGSFSGTVSK-COOH              | * | PD 1st control |                |
| NH2-ILSTLSLR-COOH                     | * | PD 1st control |                |
| NH2-LEHQLQLLQEAVNSK-COOH              | * | PD 1st control |                |
| NH2-LINWSLTDTTTR-COOH                 | * | PD 1st control |                |
| NH2-LVQQDLTDTLATLDK-COOH              | * | PD 1st control |                |
| NH2-LVQQDLTDTLATLDKIDR-COOH           | * |                | PD 2nd control |
| NH2-QATAALTALSDVDNDEETRK-COOH         | * | PD 1st control |                |
| NH2-QELEINQQLSQR-COOH                 | * | PD 1st control |                |
| NH2-SLEGNTVLQDTLQK-COOH               | * | PD 1st control |                |
| NH2-GEIAK-COOH                        | * |                | PD 3rd control |
| NH2-FSDGEVSVQINENVR-COOH              | * |                |                |
| NH2-ITAVIPYFGYAR-COOH                 | * |                |                |
| NH2-LFAGNATPELAQR-COOH                | * |                |                |
| NH2-VVADFLSSVGVDR-COOH                | * | PD 1st control |                |
| NH2-AEAGDVANAILDGTDAVM<Mox>LSGE       | * |                |                |
| NH2-AEAGDVANAILDGTDAVMLSGESAK-CC      | * |                | PD 2nd control |
| NH2-EITSTDDFYR-COOH                   | * |                |                |

|                                       |   |                                              |
|---------------------------------------|---|----------------------------------------------|
| NH2-GAVETAEKLDAPLIVVATQGGK-COOH       | * | PD 2nd control                               |
| NH2-GDLGVEIPVEEVIFAQK-COOH            | * |                                              |
| NH2-GVNLPGVSIALPALAEK-COOH            | * | PD 2nd control                               |
| NH2-LNFSGDYAEHGQR-COOH                | * |                                              |
| NH2-EKVGIDYK-COOH                     | * |                                              |
| NH2-GLPADVVPGDILLDDGR-COOH            | * |                                              |
| NH2-GVTPVHFDSANDGVAAASEAVNLLR-CC      | * | PD 2nd control                               |
| #Gln->pyro-Glu (N-term Q)#-QVRPGADYN  | * | PD 1st control PD 2nd control PD 3rd control |
| NH2-ALDILTATPPDVFNHNLENVPR-COOH       | * | PD 1st control PD 3rd control                |
| NH2-C<Cmm*>PFC<Cmm*>DVAHGRPVAP        | * | PD 3rd control                               |
| NH2-DGGAQHFADC<Cmm*>ITAIR-COOH        | * | PD 1st control PD 2nd control PD 3rd control |
| NH2-HGVTM<Mox>LTLGQYLQPSR-COOH        | * | PD 1st control PD 2nd control                |
| NH2-HGVTMLTLGQYLQPSR-COOH             | * | PD 1st control PD 3rd control                |
| NH2-IETLVPDFR-COOH                    | * | PD 1st control PD 2nd control                |
| NH2-LAQTIADMALR-COOH                  | * | PD 2nd control PD 3rd control                |
| NH2-QVRPGADYNWSLK-COOH                | * | PD 1st control PD 3rd control                |
| NH2-SGLM<Mox>VGLGETNEEIIIVM<Mox>      | * | PD 3rd control                               |
| NH2-SGLM<Mox>VGLGETNEEIIIVMR-COO      | * | PD 3rd control                               |
| NH2-SGLMVGLGETNEEIIIVM<Mox>R-COO      | * | PD 3rd control                               |
| NH2-YVSPDEFDEMK-COOH                  | * | PD 3rd control                               |
| NH2-YVVITSVDRDDLRCOOH                 | * | PD 1st control PD 2nd control PD 3rd control |
| #Gln->pyro-Glu (N-term Q)#-QAQEILDTDH | * |                                              |
| NH2-ADVAM<Mox>TGEITLR-COOH            | * |                                              |
| NH2-ADVAMTGEITLR-COOH                 | * |                                              |
| NH2-AEYLESPTIDER-COOH                 | * |                                              |
| NH2-AEYLESPTIDEREQEVLR-COOH           | * |                                              |
| NH2-DGPSAGIAMC<Cmm*>TALVSC<Cmm        | * |                                              |
| NH2-DIHVHVPEGATPK-COOH                | * |                                              |
| NH2-DLEEIPDNVIADLDIHPVK-COOH          | * |                                              |
| NH2-DLEEIPDNVIADLDIHPVKR-COOH         | * |                                              |
| NH2-DVVVYPHM<Mox>VIPLFVGR-COOH        | * |                                              |
| NH2-EASTDEPGVNDLFTVGTVASILQM<Mo       | * |                                              |
| NH2-EASTDEPGVNDLFTVGTVASILQMLK-CC     | * |                                              |
| NH2-ELGEM<Mox>DDAPDENEALKR-COOH       | * |                                              |
| NH2-ELGEMDDAPDENEALK-COOH             | * |                                              |
| NH2-ELGEMDDAPDENEALKR-COOH            | * |                                              |
| NH2-GELTVDDSAIIGIIR-COOH              | * |                                              |

NH2-GPILC<Cmm\*>LVGPPGVGK-COOH \*  
NH2-GQVLPIGGLK-COOH \*  
NH2-GYIDWMVQVPWNAR-COOH \*  
NH2-HIEINGDNLHDYLGVQR-COOH \*  
NH2-IEEVLTALQNEPSGM<Mox>QVVTAK- \*  
NH2-IEEVLTALQNEPSGMQVVTAK-COOH \*  
NH2-IEIPVLPLR-COOH \*  
NH2-IKGPILC<Cmm\*>LVGPPGVGK-COOH \*  
NH2-ILEYLAVQSR-COOH \*  
NH2-IPPEVLTSLNSIDDPAR-COOH \*  
NH2-ISALSDNGEHFSAK-COOH \*  
NH2-KGELTVDDSAIIGIIR-COOH \*  
NH2-KIPPEVLTSLNSIDDPAR-COOH \*  
NH2-LADKQSVLEM<Mox>SDVNER-COOH \*  
NH2-LADTIAAHM<Mox>PLK-COOH \*  
NH2-LADTIAAHMPLK-COOH \*  
NH2-LGINPDFYEK-COOH \*  
NH2-LGINPDFYEKR-COOH \*  
NH2-LSGYTEDEKLNIAC-COOH \*  
NH2-LTYTGSLGEVM<Mox>QESIQAALTVVR \*  
NH2-LTYTGSLGEVMQESIQAALTVVR-COOH \*  
NH2-M<Mox>M<Mox>SPM<Mox>SAEATV \*  
NH2-M<Mox>MSPMSAEATVVR-COOH \*  
NH2-MM<Mox>SPMSAEATVVR-COOH \*  
NH2-MMSPM<Mox>SAEATVVR-COOH \*  
NH2-MMSPMSAEATVVR-COOH \*  
NH2-NPLFLLDEIDK-COOH \*  
NH2-NPLFLLDEIDKM<Mox>SSDM<Mox>R- \*  
NH2-NPLFLLDEIDKMSSDM<Mox>R-COOH \*  
NH2-QAQEILDTDHYGLER-COOH \*  
NH2-RIEEVLTALQNEPSGM<Mox>QVVTAK \*  
NH2-TAISQFEGYIK-COOH \*  
NH2-TVLIPFENK-COOH \*  
NH2-TVLIPFENKR-COOH \*  
NH2-VGQVTGLAWTEVGGDLLTIETAC<Cmm \*  
NH2-LAAALLPLLANGK-COOH \*  
NH2-M<Mox>QAEGC<Cmm\*>EAWYEM<M



|                                       |   |                                              |
|---------------------------------------|---|----------------------------------------------|
| NH2-M<Mox>AQILDTPQPAQNIAPSAVIDA       | * |                                              |
| NH2-MAQILDTPQPAQNIAPSAVIDATAK-CC      | * |                                              |
| NH2-NPYLTYAR-COOH                     | * |                                              |
| NH2-TAALVMNIDDMSK-COOH                | * |                                              |
| NH2-VIIGDRVEIGAC<Cmm*>TTIDR-COOH      | * |                                              |
| NH2-GAPDVFEQFNTAVQK-COOH              | * |                                              |
| NH2-LLGETLLR-COOH                     | * |                                              |
| NH2-TYVVM<Mox>EEVK-COOH               | * |                                              |
| NH2-TYVVMEEVK-COOH                    | * |                                              |
| NH2-VGLSPTPC<Cmm*>LER-COOH            | * |                                              |
| #Gln->pyro-Glu (N-term Q)#-QLLDQLFTEH | * |                                              |
| NH2-AGVGISVVNPLTALDYAASGLVVR-COO      | * |                                              |
| NH2-HDLGLTETLHTPAGTER-COOH            | * |                                              |
| NH2-LVTSLDAILSSATTA-COOH              | * |                                              |
| NH2-VLTPDDFQGENYISLSR-COOH            | * |                                              |
| NH2-AGLTFVLVDLIK-COOH                 | * | PD 1st control PD 2nd control PD 3rd control |
| NH2-EFLENYLLTDEGLEAVNK-COOH           | * |                                              |
| NH2-FGGYAQSGLLAEITPK-COOH             | * | PD 2nd control                               |
| NH2-FPQVAATGDGPDIIFWAHDR-COOH         | * |                                              |
| NH2-LIAYPIAVEALSIIYNK-COOH            | * | PD 1st control                               |
| NH2-LYPFTWDAVR-COOH                   | * |                                              |
| NH2-TWEEIPALDKELK-COOH                | * | PD 2nd control                               |
| NH2-VNYGVTVLPTFK-COOH                 | * | PD 2nd control                               |
| NH2-VNQVAEVLQLAHLDDR-COOH             | * | PD 1st control                               |
| NH2-ASLM<Mox>SM<Mox>TPTLNR-COOH       | * |                                              |
| NH2-ASLMSMTPTLNR-COOH                 | * |                                              |
| NH2-ASVGAPPDILGPLGQNWGLPPM<Mox>       | * |                                              |
| NH2-AYEPIELLR-COOH                    | * |                                              |
| NH2-AYPEQSM<Mox>AVAATHDLPTLR-COC      | * |                                              |
| NH2-C<Cmm*>M<Mox>VIGEDLGTVPVEIV       | * |                                              |
| NH2-C<Cmm*>MVIGEDLGTVPVEIVGK-COC      | * |                                              |
| NH2-C<Cmm*>YEPQALLNK-COOH             | * |                                              |
| NH2-DLAVGVAEGGAETWC<Cmm*>DR-CO        | * |                                              |
| NH2-GGSFIGLNPIHALYPANPESASPSSR-       | * |                                              |
| NH2-GYWEC<Cmm*>GDLTGK-COOH            | * |                                              |
| NH2-LDNAALAAGISPNYINAHGKPQSISAETK     | * |                                              |
| NH2-LPEGYHTLTLTQDDQR-COOH             | * |                                              |

|                                    |   |                |
|------------------------------------|---|----------------|
| NH2-LSATLESM<Mox>FADDGVNK-COOH     | * |                |
| NH2-LWGAC<Cmm*>VQLYTLR-COOH        | * |                |
| NH2-NWGIGDFGDLK-COOH               | * |                |
| NH2-QFVAEQGDSLFWQAAFDALHAQQVK-C    | * |                |
| NH2-RLDNAALAAGISPNYINAHGKPQSISAET  | * |                |
| NH2-TLGLYPDEVVLR-COOH              | * |                |
| NH2-VAVTPVPNVM<Mox>VYTSGK-COOH     | * |                |
| NH2-VAVTPVPNVMVYTSGK-COOH          | * |                |
| NH2-FGELPFLFK-COOH                 | * | PD 2nd control |
| NH2-YIDIPELVANVK-COOH              | * | PD 2nd control |
| NH2-GSGPYFYLPK-COOH                | * |                |
| NH2-IQQQQDIDNGTLPDFISETASIR-COOH   | * | PD 2nd control |
| NH2-QAVTMDKPFLNAYSIR-COOH          | * |                |
| NH2-QILTAEAVEFLTELVTHFTPQR-COOH    | * |                |
| NH2-RVEITGPVER-COOH                | * |                |
| NH2-TEQATTTDELAFTRPYGEQEK-COOH     | * |                |
| NH2-VFM<Mox>ADFEDSLAPDWNK-COOH     | * | PD 2nd control |
| NH2-VFMADFEDSLAPDWNK-COOH          | * | PD 2nd control |
| NH2-VIASELGEER-COOH                | * |                |
| NH2-WDYIFSUIK-COOH                 | * | PD 2nd control |
| NH2-FVEGGQLGIFR-COOH               | * |                |
| NH2-LNLVQSIIR-COOH                 | * | PD 2nd control |
| NH2-LPPEANLMGFAHYLEALDFQR-COOH     | * | PD 1st control |
| NH2-TLIAYHKGDAATVESVDRM<Mox>MSA    | * | PD 1st control |
| NH2-TLIAYHKGDAATVESVDRMM<Mox>SA    | * | PD 1st control |
| NH2-TSELAQSLSSWPK-COOH             | * | PD 1st control |
| NH2-AC<Cmm*>IGIITNPVNTTVAIAAEVLKK  | * |                |
| NH2-DIALGEEFVNK-COOH               | * |                |
| NH2-FFSQPLLLGK-COOH                | * | PD 2nd control |
| NH2-GFSGEDATPALEGADVVLISAGVAR-CO   | * |                |
| NH2-IKGFSGEDATPALEGADVVLISAGVAR-C  | * |                |
| NH2-IQNAGTEVVEAK-COOH              | * |                |
| NH2-LFGVTTLDIIR-COOH               | * |                |
| NH2-SDLFNVNAGIVK-COOH              | * | PD 1st control |
| NH2-SNTFVAELK-COOH                 | * |                |
| NH2-TQLPSGSELSLYDIAPVTPGVAVDLSHIPT | * |                |
| NH2-VAVLGAAGGIGQALALLK-COOH        | * |                |

|                                   |   |                                              |
|-----------------------------------|---|----------------------------------------------|
| NH2-EIWFLC<Cmm*>R-COOH            | * | PD 2nd control                               |
| NH2-EMIQALADAR-COOH               | * | PD 3rd control                               |
| NH2-EMLQNSPMALR-COOH              | * | PD 3rd control                               |
| NH2-QALDM<Mox>GLVNTVVPLADLEK-COOH | * | PD 3rd control                               |
| NH2-QALDM<Mox>GLVNTVVPLADLEKETV   | * | PD 1st control PD 3rd control                |
| NH2-QALDMGLVNTVVPLADLEK-COOH      | * | PD 3rd control                               |
| NH2-VGSFDGGWGASYM<Mox>AR-COOH     | * | PD 3rd control                               |
| NH2-VGSFDGGWGASYMAR-COOH          | * | PD 3rd control                               |
| NH2-YDDNIGVIILTGA GDK-COOH        | * | PD 1st control PD 2nd control PD 3rd control |
| NH2-FFINPTGR-COOH                 | * |                                              |
| NH2-FVIGGPM<Mox>GDC<Cmm*>GLTGR-   | * |                                              |
| NH2-IADQISDAVLDAILEQDPK-COOH      | * | PD 2nd control                               |
| NH2-IVGIDAVVLSTQHSEEIDQK-COOH     | * | PD 2nd control                               |
| NH2-VPSEQLTLLVR-COOH              | * |                                              |
| NH2-ASNQGEPVILDINADAGKAYADTVER-C  | * |                                              |
| NH2-ASNQGEPVILDINADAGK-COOH       | * |                                              |
| NH2-LVGVIPEDQSVLR-COOH            | * | PD 1st control                               |
| NH2-MLSFEIIGTSTLQSR-COOH          | * | PD 1st control PD 2nd control                |
| NH2-TAWENIAPQLDAR-COOH            | * | PD 2nd control                               |
| NH2-TLIFAMPGSTK-COOH              | * | PD 2nd control                               |
| NH2-LADIASGQPLPVAGK-COOH          | * |                                              |
| NH2-EDIDAEQLATGDL SER-COOH        | * |                                              |
| NH2-LLIAPVLR-COOH                 | * |                                              |
| NH2-LNELGASSINFVVR-COOH           | * | PD 2nd control                               |
| NH2-QILTNIQSEDR-COOH              | * | PD 1st control PD 3rd control                |
| NH2-HLVSPADALPGR-COOH             | * |                                              |
| NH2-SAIYPLTPEQDAAAR-COOH          | * |                                              |
| NH2-AWVEEHVGFVDSAVDR-COOH         | * | PD 2nd control                               |
| NH2-FENPYLKDDVER-COOH             | * |                                              |
| NH2-IQIAEQSQLAPASVTK-COOH         | * |                                              |
| NH2-LIDQYGPISR-COOH               | * |                                              |
| NH2-M<Mox>TPGGQAQIGNVDLVK-COOH    | * |                                              |
| NH2-NGNVGEIGHIQVEPLGER-COOH       | * |                                              |
| NH2-SAIGAFALVK-COOH               | * |                                              |
| NH2-TIAIAINLFNPQK-COOH            | * |                                              |
| NH2-VLAEEHYPLPER-COOH             | * |                                              |
| NH2-VLLPAIESC<Cmm*>INTQALK-COOH   | * |                                              |

|                                         |   |                |                               |
|-----------------------------------------|---|----------------|-------------------------------|
| NH2-LIAHVGVC<Cmm*>VSTAESQQLAASAK-       | * |                |                               |
| NH2-ALQSHLNSVSATWHAFGQTTNK-COOH         | * |                |                               |
| NH2-DFLSHPGGIAHFEQLR-COOH               | * |                |                               |
| NH2-LFFESSLVR-COOH                      | * |                |                               |
| NH2-YAAEHATDEQIDLLAK-COOH               | * |                |                               |
| NH2-AADLVDALGQENNPWK-COOH               | * | PD 1st control |                               |
| NH2-AWAALSEFTGR-COOH                    | * | PD 1st control |                               |
| NH2-AYTPAWAEQITGVSR-COOH                | * | PD 1st control |                               |
| NH2-IVNLPGSEITQQR-COOH                  | * | PD 1st control | PD 3rd control                |
| NH2-TPDAHFFTEVR-COOH                    | * | PD 1st control |                               |
| NH2-TVAVTPDYAEIAK-COOH                  | * | PD 1st control |                               |
| NH2-IADEAR-COOH                         | * |                | PD 3rd control                |
| NH2-QLLNEFPELK-COOH                     | * | PD 2nd control |                               |
| NH2-MTSISEVTDVYGVSER-COOH               | * |                |                               |
| NH2-NGGIR-COOH                          | * |                |                               |
| NH2-DAGLK-COOH                          | * |                |                               |
| NH2-GEGQPGDIETLEQLC<Cmm*>R-COOH         | * |                |                               |
| NH2-LGTALAM<Mox>AVDHEINM<Mox>VS         | * |                |                               |
| NH2-FFQVYDPAYYDSK-COOH                  | * |                |                               |
| NH2-IPELAGIKDAAPDATFR-COOH              | * |                |                               |
| NH2-GVC<Cmm*>TLEDLAEQGIDDLADIEGL        | * |                |                               |
| NH2-ESAPAAAAPAAQPALAAR-COOH             | * |                |                               |
| NH2-QQASLEEQNNDALSPAIR-COOH             | * |                |                               |
| NH2-SSVDILVPDLPESVADATVATWHK-COO        | * |                |                               |
| #Acetyl (Protein N-term)#-SERFPNDVDPIET | * | PD 1st control | PD 3rd control                |
| #Gln->pyro-Glu (N-term Q)#-QENVYYYITTL  | * |                | PD 3rd control                |
| #Gln->pyro-Glu (N-term Q)#-QENVYYYITTL  | * | PD 2nd control | PD 3rd control                |
| #Gln->pyro-Glu (N-term Q)#-QEVHGNGLSS   | * |                | PD 3rd control                |
| #Gln->pyro-Glu (N-term Q)#-QIGIYSPNGQQ  | * | PD 1st control | PD 2nd control PD 3rd control |
| #Gln->pyro-Glu (N-term Q)#-QIGIYSPNGQQ  | * |                | PD 2nd control                |
| #Gln->pyro-Glu (N-term Q)#-QPNFTEKLELP  | * | PD 1st control | PD 2nd control PD 3rd control |
| #Gln->pyro-Glu (N-term Q)#-QTVYAFLGDG   | * |                | PD 2nd control PD 3rd control |
| NH2-AFLEGR-COOH                         | * | PD 1st control | PD 3rd control                |
| NH2-ALNVM<Mox>LK-COOH                   | * |                | PD 3rd control                |
| NH2-ALNVMLK-COOH                        | * | PD 1st control | PD 2nd control                |
| NH2-AQYLIDQLLAEAR-COOH                  | * | PD 1st control | PD 2nd control PD 3rd control |
| NH2-AQYLIDQLLAEARK-COOH                 | * | PD 1st control |                               |

|                                      |   |                |                |                |
|--------------------------------------|---|----------------|----------------|----------------|
| NH2-ARNEQDGGDLVYFQGHISPGVYAR-COOH    | * | PD 1st control | PD 2nd control | PD 3rd control |
| NH2-ATVILAHTIK-COOH                  | * | PD 1st control | PD 2nd control | PD 3rd control |
| NH2-ATVILAHTIKGYGMGDAAEGK-COOH       | * |                |                | PD 3rd control |
| NH2-DGAYVR-COOH                      | * |                |                | PD 3rd control |
| NH2-DGQDC<Cmm*>ER-COOH               | * |                | PD 2nd control | PD 3rd control |
| NH2-DLELGGHM<Mox>ASFQSSATIYDVC<Cmm*> | * | PD 1st control | PD 2nd control | PD 3rd control |
| NH2-DLELGGHMASFQSSATIYDVC<Cmm*>      | * | PD 1st control | PD 2nd control | PD 3rd control |
| NH2-DRFNVPVSDADIEK-COOH              | * | PD 1st control | PD 2nd control | PD 3rd control |
| NH2-DRFNVPVSDADIEKLPYITFPEGSEEHTYL   | * | PD 1st control | PD 2nd control | PD 3rd control |
| NH2-DRLVPIIADEAR-COOH                | * | PD 1st control |                | PD 3rd control |
| NH2-DWLQAIESVIR-COOH                 | * | PD 1st control | PD 2nd control | PD 3rd control |
| NH2-DWLQAIESVIREEGVER-COOH           | * | PD 1st control | PD 2nd control | PD 3rd control |
| NH2-DYGVGSDVYSVTSFTELAR-COOH         | * | PD 1st control | PD 2nd control | PD 3rd control |
| NH2-EAAEILAK-COOH                    | * | PD 1st control | PD 2nd control | PD 3rd control |
| NH2-EAAEILAKDYGVGSDVYSVTSFTELAR-COOH | * | PD 1st control |                |                |
| NH2-EHFFGKYPETAALVADWTDEQIWALNR      | * | PD 1st control | PD 2nd control | PD 3rd control |
| NH2-EISTTIAFVR-COOH                  | * | PD 1st control | PD 2nd control | PD 3rd control |
| NH2-EKLDNLVFINC<Cmm*>NLQR-COOH       | * | PD 1st control | PD 2nd control | PD 3rd control |
| NH2-EQVAYYK-COOH                     | * |                |                | PD 3rd control |
| NH2-EQVAYYKEDEK-COOH                 | * | PD 1st control | PD 2nd control | PD 3rd control |
| NH2-FNIDADK-COOH                     | * |                |                | PD 3rd control |
| NH2-FNIDADKVNPR-COOH                 | * | PD 1st control | PD 2nd control | PD 3rd control |
| NH2-FNVPVSDADIEK-COOH                | * | PD 1st control | PD 2nd control | PD 3rd control |
| NH2-FNVPVSDADIEKLPYITFPEGSEEHTYLHA   | * | PD 1st control | PD 2nd control | PD 3rd control |
| NH2-FPNDVDPIETR-COOH                 | * | PD 1st control | PD 2nd control | PD 3rd control |
| NH2-FPNDVDPIETRDWLQAIESVIR-COOH      | * | PD 1st control |                |                |
| NH2-GAITIATR-COOH                    | * | PD 1st control | PD 2nd control | PD 3rd control |
| NH2-GFLIGGTSGR-COOH                  | * | PD 1st control | PD 2nd control | PD 3rd control |
| NH2-GGVNVAAGTGISNYINTIPVEEQPEYPGM    | * | PD 1st control | PD 2nd control | PD 3rd control |
| NH2-GGVNVAAGTGISNYINTIPVEEQPEYPGM    | * | PD 1st control | PD 2nd control | PD 3rd control |
| NH2-GIYKLETIEGSK-COOH                | * | PD 1st control | PD 2nd control | PD 3rd control |
| NH2-GKATVILAHTIK-COOH                | * | PD 1st control | PD 2nd control | PD 3rd control |
| NH2-GKVQLLGSILR-COOH                 | * | PD 1st control | PD 2nd control | PD 3rd control |
| NH2-GYGM<Mox>GDAAEGK-COOH            | * |                | PD 2nd control | PD 3rd control |
| NH2-GYGMGDAAEGK-COOH                 | * |                | PD 2nd control | PD 3rd control |
| NH2-HHFEVDASYVVVAALGELAK-COOH        | * | PD 1st control | PD 2nd control | PD 3rd control |
| NH2-HHFEVDASYVVVAALGELAKR-COOH       | * | PD 1st control |                |                |

|                                     |   |                |                |                |
|-------------------------------------|---|----------------|----------------|----------------|
| NH2-IGDLC<Cmm*>WAAGDQQAR-COOH       | * | PD 1st control | PD 2nd control | PD 3rd control |
| NH2-IINELEGIFEGAGWNVIK-COOH         | * | PD 1st control | PD 2nd control | PD 3rd control |
| NH2-IYAAFK-COOH                     | * | PD 1st control | PD 2nd control | PD 3rd control |
| NH2-KDLELGGHMASFQSSATIYDVC<Cmm*>    | * | PD 1st control |                | PD 3rd control |
| NH2-KGGVNVAAGTGISNYINTIPVEEQPEYPC   | * | PD 1st control | PD 2nd control | PD 3rd control |
| NH2-KGGVNVAAGTGISNYINTIPVEEQPEYPC   | * | PD 1st control | PD 2nd control | PD 3rd control |
| NH2-KGIYKLETIEGSK-COOH              | * | PD 1st control |                | PD 3rd control |
| NH2-KIYAAFK-COOH                    | * |                |                | PD 3rd control |
| NH2-KMNMDGVR-COOH                   | * |                |                | PD 3rd control |
| NH2-KVVADAIK-COOH                   | * |                |                | PD 3rd control |
| NH2-LDGPVTGNGK-COOH                 | * | PD 1st control |                | PD 3rd control |
| NH2-LDGPVTGNGKIINELEGIFEGAGWNVIK-   | * | PD 1st control |                |                |
| NH2-LDNLVFINC<Cmm*>NLQR-COOH        | * | PD 1st control | PD 2nd control | PD 3rd control |
| NH2-LELPSLQDFGALLEEQSK-COOH         | * | PD 1st control | PD 2nd control | PD 3rd control |
| NH2-LELPSLQDFGALLEEQSKEISTTIAFVR-CC | * | PD 1st control | PD 2nd control | PD 3rd control |
| NH2-LETIEGSK-COOH                   | * | PD 1st control | PD 2nd control | PD 3rd control |
| NH2-LFAEQVR-COOH                    | * | PD 1st control | PD 2nd control | PD 3rd control |
| NH2-LHGYPISR-COOH                   | * | PD 1st control | PD 2nd control | PD 3rd control |
| NH2-LIQLM<Mox>NETVDGDYQTFK-COOH     | * | PD 1st control | PD 2nd control | PD 3rd control |
| NH2-LIQLMNETVDGDYQTFK-COOH          | * | PD 1st control | PD 2nd control | PD 3rd control |
| NH2-LM<Mox>PEFWQFPTVSM<Mox>GLG      | * | PD 1st control | PD 2nd control | PD 3rd control |
| NH2-LM<Mox>PEFWQFPTVSMGLGPIGAIYQ    | * | PD 1st control | PD 2nd control | PD 3rd control |
| NH2-LMPEFWQFPTVSM<Mox>GLGPIGAIYQ    | * | PD 1st control | PD 2nd control | PD 3rd control |
| NH2-LMPEFWQFPTVSMGLGPIGAIYQAK-CC    | * | PD 1st control | PD 2nd control | PD 3rd control |
| NH2-LPYITFPEGSEEHTYLHAQR-COOH       | * | PD 1st control | PD 2nd control | PD 3rd control |
| NH2-LTQEQLDNFR-COOH                 | * | PD 1st control | PD 2nd control | PD 3rd control |
| NH2-LTQEQLDNFRQEVHGNGLSSYPHPK-CC    | * | PD 1st control | PD 2nd control | PD 3rd control |
| NH2-LVPIIADEAR-COOH                 | * | PD 1st control | PD 2nd control | PD 3rd control |
| NH2-M<Mox>NM<Mox>DGVR-COOH          | * |                | PD 2nd control |                |
| NH2-MNMDGVR-COOH                    | * | PD 1st control |                |                |
| NH2-NEQDGGDLVYFQGHISPGVYAR-COOH     | * | PD 1st control | PD 2nd control | PD 3rd control |
| NH2-NIAHQVK-COOH                    | * | PD 1st control | PD 2nd control |                |
| NH2-QENVYYYITTLNENYHM<Mox>PAM<M     | * | PD 1st control | PD 2nd control | PD 3rd control |
| NH2-QENVYYYITTLNENYHM<Mox>PAM<M     | * |                | PD 2nd control | PD 3rd control |
| NH2-QENVYYYITTLNENYHM<Mox>PAMPE     | * |                | PD 2nd control | PD 3rd control |
| NH2-QENVYYYITTLNENYHM<Mox>PAMPE     | * | PD 1st control | PD 2nd control | PD 3rd control |
| NH2-QENVYYYITTLNENYHMPAM<Mox>PE     | * |                | PD 2nd control | PD 3rd control |



|                                      |   |                |                |                |
|--------------------------------------|---|----------------|----------------|----------------|
| NH2-QENVVYYITTLNENYHMPAM<Mox>PE      | * |                | PD 2nd control | PD 3rd control |
| NH2-QENVVYYITTLNENYHMPAMPEGAEEG      | * | PD 1st control | PD 2nd control | PD 3rd control |
| NH2-QENVVYYITTLNENYHMPAMPEGAEEG      | * | PD 1st control | PD 2nd control | PD 3rd control |
| NH2-QEVHGNGLSSYPHPK-COOH             | * |                |                | PD 3rd control |
| NH2-QIGIYSPNGQQYTPQDR-COOH           | * | PD 1st control | PD 2nd control | PD 3rd control |
| NH2-QIGIYSPNGQQYTPQDREQVAYYK-COO     | * | PD 1st control | PD 2nd control | PD 3rd control |
| NH2-QKLHGYLPSR-COOH                  | * | PD 1st control |                | PD 3rd control |
| NH2-QPNFTEK-COOH                     | * |                |                | PD 3rd control |
| NH2-QPNFTEKLELPSLQDFGALLEEQSK-COO    | * | PD 1st control | PD 2nd control | PD 3rd control |
| NH2-QPNFTEKLELPSLQDFGALLEEQSKEISTT   | * | PD 1st control |                |                |
| NH2-QTVYAFLGDGEM<Mox>DEPESK-COO      | * | PD 1st control | PD 2nd control | PD 3rd control |
| NH2-QTVYAFLGDGEMDEPESK-COOH          | * | PD 1st control | PD 2nd control | PD 3rd control |
| NH2-SAIRWNAIMTVLR-COOH               | * | PD 1st control |                |                |
| NH2-SERFPNDVDPIETR-COOH              | * | PD 1st control | PD 2nd control | PD 3rd control |
| NH2-TFGM<Mox>EGLFR-COOH              | * | PD 1st control | PD 2nd control | PD 3rd control |
| NH2-TFGMEGLFR-COOH                   | * | PD 1st control | PD 2nd control | PD 3rd control |
| NH2-TYVPADDYR-COOH                   | * | PD 1st control | PD 2nd control | PD 3rd control |
| NH2-VLGTDGFGFR-COOH                  | * | PD 1st control | PD 2nd control | PD 3rd control |
| NH2-VPYIAQVM<Mox>NDAPAVASTDYM<M      | * | PD 1st control | PD 2nd control | PD 3rd control |
| NH2-VPYIAQVM<Mox>NDAPAVASTDYMK-      | * | PD 1st control | PD 2nd control | PD 3rd control |
| NH2-VPYIAQVMNDAPAVASTDYM<Mox>K-      | * | PD 1st control | PD 2nd control | PD 3rd control |
| NH2-VPYIAQVMNDAPAVASTDYMK-COOH       | * | PD 1st control | PD 2nd control | PD 3rd control |
| NH2-VQLLGSGSILR-COOH                 | * | PD 1st control | PD 2nd control | PD 3rd control |
| NH2-VVADAIK-COOH                     | * | PD 1st control | PD 2nd control | PD 3rd control |
| NH2-WDELLR-COOH                      | * | PD 1st control | PD 2nd control | PD 3rd control |
| NH2-WNAIM<Mox>TVLR-COOH              | * | PD 1st control | PD 2nd control | PD 3rd control |
| NH2-WNAIMTVLR-COOH                   | * | PD 1st control | PD 2nd control | PD 3rd control |
| NH2-WNM<Mox>LHPLETPR-COOH            | * | PD 1st control | PD 2nd control | PD 3rd control |
| NH2-WNMLHPLETPR-COOH                 | * | PD 1st control | PD 2nd control | PD 3rd control |
| NH2-YPETAALVADWTDEQIWALNR-COOH       | * | PD 1st control | PD 2nd control | PD 3rd control |
| #Gln->pyro-Glu (N-term Q)#-QEAPAAAPA | * |                |                | PD 3rd control |
| NH2-AEAAPAATGGGIPGM<Mox>LPWPK-C      | * | PD 1st control | PD 2nd control | PD 3rd control |
| NH2-AEAAPAATGGGIPGMPLWPK-COOH        | * | PD 1st control | PD 2nd control | PD 3rd control |
| NH2-AEAPAAAPAAK-COOH                 | * | PD 1st control | PD 2nd control | PD 3rd control |
| NH2-AEGKSEFAENDAYVHATPLIR-COOH       | * | PD 1st control | PD 2nd control | PD 3rd control |
| NH2-AIEIKVPDIGADEVEITEILVK-COOH      | * | PD 1st control | PD 2nd control | PD 3rd control |
| NH2-AVAAALEQM<Mox>PR-COOH            | * | PD 1st control | PD 2nd control | PD 3rd control |

|                                         |   |                |                |                |
|-----------------------------------------|---|----------------|----------------|----------------|
| NH2-AVAAALEQMPR-COOH                    | * | PD 1st control | PD 2nd control | PD 3rd control |
| NH2-DVNVDPDIGSDEVEVTEILVK-COOH          | * | PD 1st control | PD 2nd control | PD 3rd control |
| NH2-EAAPAAAPAAAAAK-COOH                 | * |                | PD 2nd control | PD 3rd control |
| NH2-EDVQAYVK-COOH                       | * |                | PD 2nd control | PD 3rd control |
| NH2-EFGVNLAKE-COOH                      | * | PD 1st control | PD 2nd control | PD 3rd control |
| NH2-ELMTISK-COOH                        | * |                |                | PD 3rd control |
| NH2-EVNVDPDIGGDEVEVTEVM<Mox>VK-COOH     | * | PD 1st control | PD 2nd control | PD 3rd control |
| NH2-EVNVDPDIGGDEVEVTEVMVK-COOH          | * | PD 1st control | PD 2nd control | PD 3rd control |
| NH2-FGEIEEVELGR-COOH                    | * | PD 1st control | PD 2nd control | PD 3rd control |
| NH2-FITIINNTLSDIR-COOH                  | * | PD 1st control | PD 2nd control | PD 3rd control |
| NH2-FITIINNTLSDIRR-COOH                 | * | PD 1st control | PD 2nd control | PD 3rd control |
| NH2-FNSSLSEDGQR-COOH                    | * | PD 1st control | PD 2nd control | PD 3rd control |
| NH2-ILREDVQAYVK-COOH                    | * | PD 1st control | PD 2nd control | PD 3rd control |
| NH2-ISGANLSR-COOH                       | * | PD 1st control | PD 2nd control | PD 3rd control |
| NH2-ITPVVFIM<Mox>KAVAAALEQM<Mox>PR-COOH | * |                |                | PD 3rd control |
| NH2-ITPVVFIM<Mox>KAVAAALEQMPR-COOH      | * |                | PD 2nd control |                |
| NH2-ITPVVFIM<Mox>K-COOH                 | * | PD 1st control | PD 2nd control | PD 3rd control |
| NH2-ITPVVFIMKAVAAALEQM<Mox>PR-COOH      | * |                |                | PD 3rd control |
| NH2-ITPVVFIMKAVAAALEQMPR-COOH           | * | PD 1st control | PD 2nd control |                |
| NH2-ITPVVFIMK-COOH                      | * | PD 1st control | PD 2nd control | PD 3rd control |
| NH2-KEAAPAAAPAAAAAK-COOH                | * |                | PD 2nd control | PD 3rd control |
| NH2-KGIIELSR-COOH                       | * | PD 1st control | PD 2nd control | PD 3rd control |
| NH2-KYINIGVAVDTPNGLVVPVFK-COOH          | * | PD 1st control | PD 2nd control | PD 3rd control |
| NH2-LM<Mox>LPISLSFDHR-COOH              | * | PD 1st control | PD 2nd control | PD 3rd control |
| NH2-LMLPISLSFDHR-COOH                   | * | PD 1st control | PD 2nd control | PD 3rd control |
| NH2-NWVM<Mox>IPHVTHFDK-COOH             | * |                | PD 2nd control | PD 3rd control |
| NH2-NWVM<Mox>IPHVTHFDKTDITELEAFR-COOH   | * | PD 1st control | PD 2nd control | PD 3rd control |
| NH2-NWVM<Mox>IPHVTHFDKTDITELEAFR-COOH   | * |                | PD 2nd control |                |
| NH2-NWVMIPHVTHFDK-COOH                  | * | PD 1st control | PD 2nd control | PD 3rd control |
| NH2-NWVMIPHVTHFDKTDITELEAFR-COOH        | * | PD 1st control | PD 2nd control | PD 3rd control |
| NH2-NWVMIPHVTHFDKTDITELEAFR-COOH        | * | PD 1st control | PD 2nd control | PD 3rd control |
| NH2-QEAAAPAPAAK-COOH                    | * | PD 1st control | PD 2nd control | PD 3rd control |
| NH2-QEAAAPAAAPAAPAGVK-COOH              | * | PD 1st control | PD 2nd control | PD 3rd control |
| NH2-QQNEEAAK-COOH                       | * |                | PD 2nd control |                |
| NH2-RAEAAPAATGGGIPGM<Mox>LPWPK-COOH     | * | PD 1st control | PD 2nd control | PD 3rd control |
| NH2-RAEAAPAATGGGIPGMPLWPK-COOH          | * | PD 1st control | PD 2nd control | PD 3rd control |
| NH2-SAM<Mox>EPVWNGK-COOH                | * |                | PD 2nd control | PD 3rd control |



|                                   |   |                |                |                |
|-----------------------------------|---|----------------|----------------|----------------|
| NH2-SAM<Mox>EPVWNGKEFVPR-COOH     | * | PD 1st control | PD 2nd control | PD 3rd control |
| NH2-SAMEPVWNGK-COOH               | * | PD 1st control | PD 2nd control | PD 3rd control |
| NH2-SAMEPVWNGKEFVPR-COOH          | * | PD 1st control | PD 2nd control | PD 3rd control |
| NH2-SEFAENDAYVHATPLIR-COOH        | * | PD 1st control | PD 2nd control | PD 3rd control |
| NH2-TDITELEAFR-COOH               | * | PD 1st control |                | PD 3rd control |
| NH2-TDITELEAFRK-COOH              | * | PD 1st control | PD 2nd control | PD 3rd control |
| NH2-TGSLIM<Mox>IFEVEGAAPAAAPAK-CC | * | PD 1st control | PD 2nd control | PD 3rd control |
| NH2-TGSLIM<Mox>IFEVEGAAPAAAPAKQE  | * | PD 1st control | PD 2nd control | PD 3rd control |
| NH2-TGSLIMIFEVEGAAPAAAPAK-COOH    | * | PD 1st control | PD 2nd control | PD 3rd control |
| NH2-TGSLIMIFEVEGAAPAAAPAKQEAAAPA  | * | PD 1st control | PD 2nd control | PD 3rd control |
| NH2-TQTGALIM<Mox>IFDSADGAADAAPAC  | * | PD 1st control | PD 2nd control | PD 3rd control |
| NH2-TQTGALIM<Mox>IFDSADGAADAAPAC  | * | PD 1st control |                | PD 3rd control |
| NH2-TQTGALIMIFDSADGAADAAPAQAEK-   | * | PD 1st control | PD 2nd control | PD 3rd control |
| NH2-TQTGALIMIFDSADGAADAAPAQAEKK   | * |                | PD 2nd control | PD 3rd control |
| NH2-TQTGALIMIFDSADGAADAAPAQAEKK   | * |                |                | PD 3rd control |
| NH2-VIDGADGAR-COOH                | * | PD 1st control | PD 2nd control | PD 3rd control |
| NH2-VNVGDKVK-COOH                 | * |                | PD 2nd control | PD 3rd control |
| NH2-VNVGDKVSTGSLIM<Mox>VFEVAGEAC  | * | PD 1st control | PD 2nd control | PD 3rd control |
| NH2-VNVGDKVSTGSLIMVFEVAGEAGAAAP   | * | PD 1st control | PD 2nd control | PD 3rd control |
| NH2-VPDIGADEVEITEILVK-COOH        | * | PD 1st control | PD 2nd control | PD 3rd control |
| NH2-VSTGSLIM<Mox>VFEVAGEAGAAAPAA  | * | PD 1st control | PD 2nd control | PD 3rd control |
| NH2-VSTGSLIMVFEVAGEAGAAAPAAK-COC  | * | PD 1st control | PD 2nd control | PD 3rd control |
| NH2-VSVGDKTQTGALIM<Mox>IFDSADGAA  | * |                | PD 2nd control | PD 3rd control |
| NH2-VSVGDKTQTGALIM<Mox>IFDSADGAA  | * | PD 1st control | PD 2nd control | PD 3rd control |
| NH2-VSVGDKTQTGALIMIFDSADGAADAAP   | * | PD 1st control | PD 2nd control | PD 3rd control |
| NH2-VSVGDKTQTGALIMIFDSADGAADAAP   | * | PD 1st control | PD 2nd control | PD 3rd control |
| NH2-YINIGVAVDTPNGLVVPVFK-COOH     | * | PD 1st control | PD 2nd control | PD 3rd control |
| NH2-YINIGVAVDTPNGLVVPVFKDVNK-COO  | * | PD 1st control | PD 2nd control | PD 3rd control |
| NH2-YINIGVAVDTPNGLVVPVFKDVNKK-COC | * |                | PD 2nd control | PD 3rd control |
| NH2-AALIDC<Cmm*>LAPDR-COOH        | * |                |                |                |
| NH2-AQSVVDYLISK-COOH              | * |                |                |                |
| NH2-ATLKPEGQAALDQLYSQLSNLDPK-COO  | * |                |                |                |
| NH2-DGSVVVLGYTDR-COOH             | * | PD 1st control |                | PD 3rd control |
| NH2-FGQGEAAPVVAPAPAPAPEVQTK-COO   | * |                |                |                |
| NH2-IGSDAYNQGLSER-COOH            | * |                |                |                |
| NH2-LGYPITDDLDIYTR-COOH           | * | PD 1st control |                | PD 3rd control |
| NH2-RAQSVVDYLISK-COOH             | * |                |                |                |

|                                       |   |                |                |
|---------------------------------------|---|----------------|----------------|
| NH2-SDVLFNFK-COOH                     | * |                |                |
| NH2-FQDVGSFDYGR-COOH                  | * | PD 1st control |                |
| NH2-INLLDDNQFTR-COOH                  | * | PD 1st control | PD 3rd control |
| NH2-YDANNIYLAAQYTQTYNATR-COOH         | * |                |                |
| NH2-YVDVGATYYFNK-COOH                 | * | PD 1st control |                |
| NH2-KLPEDTPVTAQTSIGDNGEIVESTVR-COOH   | * |                |                |
| NH2-YADYQQIQFNHDK-COOH                | * |                |                |
| NH2-AEQQLDKDSAIVPVYYYVNAR-COOH        | * |                | PD 2nd control |
| NH2-LVKPWVGGYTGKDPLDNTYTR-COOH        | * |                | PD 2nd control |
| NH2-SVDPNTASPYASYLQYGHIAIDEILEGK-COOH | * |                |                |
| NH2-TVINQVTYLPIASEVTDVNR-COOH         | * |                | PD 2nd control |
| NH2-GKGTVSTESGVLNQQPYGFNTR-COOH       | * |                |                |
| NH2-SEVAVPGIDASTFDGIIQK-COOH          | * |                | PD 2nd control |
| NH2-KLLMKIFR-COOH                     | * |                |                |
| NH2-AADSC<Cmm*>HVSQPTLSGQIR-COOH      | * |                |                |
| NH2-DLEYLVALAEHR-COOH                 | * |                |                |
| NH2-NMVAAGSGITLLPALAVPPER-COOH        | * |                |                |
| NH2-SRYEQLAEAIR-COOH                  | * |                |                |
| NH2-EVAQAALIDQPK-COOH                 | * |                |                |
| NH2-GEDGLAQLYVLPQSTLTIHVGK-COOH       | * |                |                |
| NH2-INLNM<Mox>IGLDGRPAVK-COOH         | * |                |                |
| NH2-KEDGAVVISALPHQVSGAR-COOH          | * |                |                |
| NH2-MLMFPVSDLPQLSK-COOH               | * |                |                |
| NH2-SNQPVFVDSTGR-COOH                 | * |                |                |
|                                       |   |                |                |
| NH2-SYAIDPITLPSAR-COOH                | * |                |                |
| NH2-VLEQIAAQMR-COOH                   | * |                |                |
| NH2-YPLVDGQGNWGAPDDPK-COOH            | * |                |                |
| NH2-RRYEDDDYDDYDDYEDEEPM<Mox>P        | * |                |                |
| NH2-GVLTNLGAVAVDTGIFTGR-COOH          | * |                |                |
| NH2-LFIDNFDKYTDTPAGAALVAAGPK-COOH     | * |                |                |
| NH2-NTYASPEQWQEK-COOH                 | * |                |                |
| NH2-AAYDLLALR-COOH                    | * |                |                |
| NH2-AGYEAWLVGGGVR-COOH                | * |                |                |
| NH2-DFDVTTNATPEQVR-COOH               | * |                |                |
| NH2-DIWQLQLR-COOH                     | * |                |                |
| NH2-DNIFGSIEEDAQR-COOH                | * |                |                |

NH2-DNIFGSIEEDAQRR-COOH \*

NH2-EESEAEQAVARPQVTVIPR-COOH \*

NH2-GM<Mox>LNELDEEPSR-COOH \*

NH2-GMLNELDEEPSR-COOH \*

NH2-IAQESGLTYHDAFALAM<Mox>NDVLDI \*

NH2-IAQESGLTYHDAFALAMNDVLDEAC<Cm \*

NH2-ISPETAEPIPR-COOH \*

NH2-LAHVM<Mox>FGPEIIEVATFR-COOH \*

NH2-LAHVMFGPEIIEVATFR-COOH \*

NH2-LATLLNDIPPAR-COOH \*

NH2-LLC<Cmm\*>EYHLFQPLFPTITR-COOH \*

NH2-LLQAGYGYETYK-COOH \*

NH2-WWGEFQVSAPPDQK-COOH \*

NH2-YFTENGDSMER-COOH \*

NH2-HLAFIEEILLDR-COOH \*

NH2-LSDVIEQQLEFLILEGTLRPGEK-COOH \*

NH2-GNIGYIGVPER-COOH \*

NH2-MDKLLER-COOH \*

NH2-AGAPFGPGANPMHGR-COOH \*

NH2-ALIPFGGIK-COOH \*

NH2-DAIPTQSVLTITSNVVYGK-COOH \*

NH2-EM<Mox>LLDAM<Mox>ENPEKYPQLT \*

NH2-ITEQEAQEMVDHLVM<Mox>K-COOH \*

NH2-ITEQEAQEMVDHLVMK-COOH \*

NH2-IVGLQTEAPLKR-COOH \*

NH2-LAQFTSLQADLENGVNLEQTIR-COOH \*

NH2-LATAWEGFTK-COOH \*

NH2-LPFAYAK-COOH \*

NH2-RAGAPFGPGANPMHGR-COOH \*

NH2-SEPIKGDVLNYDEVM<Mox>ER-COOH \*

NH2-SGVLTLGLPDAYGR-COOH \*

NH2-THAPVDFDTAVASTITSHDAGYINK-COC \*

NH2-THNQGVFDVYTPDILR-COOH \*

NH2-TM<Mox>AC<Cmm\*>GIAGLSVAADSL \*

NH2-TM<Mox>LYAINGGVDEK-COOH \*

NH2-TMAC<Cmm\*>GIAGLSVAADSLSAIK-C \*

NH2-TMLYAINGGVDEK-COOH \*

PD 2nd control

|                                        |   |                |                |                |
|----------------------------------------|---|----------------|----------------|----------------|
| NH2-TSTFLDVYIER-COOH                   | * |                |                |                |
| NH2-VALYGIDYLM<Mox>K-COOH              | * |                |                |                |
| NH2-VALYGIDYLMK-COOH                   | * |                |                |                |
| NH2-VDDLAVDLVER-COOH                   | * |                |                |                |
| NH2-ADEQILDIGDASAQELAEILK-COOH         | * |                | PD 2nd control |                |
| NH2-ALKEPARPM<Mox>VAIVGGSK-COOH        | * |                |                |                |
| NH2-ALKEPARPMVAIVGGSK-COOH             | * |                |                |                |
| NH2-ASLPTIELALK-COOH                   | * |                | PD 2nd control |                |
| NH2-DYLDGVDVAEGELVLENVR-COOH           | * |                | PD 2nd control |                |
| NH2-FADVAC<Cmm*>AGPLLAELDALGK-C        | * | PD 1st control | PD 2nd control |                |
| NH2-IADQLIVGGGIANTFIAAQGHVVGK-COO      | * | PD 1st control | PD 2nd control | PD 3rd control |
| NH2-ISYISTGGGAFLEFVEGK-COOH            | * |                | PD 2nd control | PD 3rd control |
| NH2-LLTTC<Cmm*>NIPVPSDVR-COOH          | * | PD 1st control | PD 2nd control | PD 3rd control |
| NH2-LTVLDSLSK-COOH                     | * | PD 1st control |                |                |
| NH2-SLYEADLVDEAK-COOH                  | * |                |                | PD 3rd control |
| NH2-SLYEADLVDEAKR-COOH                 | * |                |                | PD 3rd control |
| NH2-SVNDVKADEQILDIGDASAQELAEILK-CO     | * |                |                |                |
| NH2-VATEFSETAPATLK-COOH                | * | PD 1st control | PD 2nd control | PD 3rd control |
| NH2-VLPAVAM<Mox>LEER-COOH              | * | PD 1st control |                | PD 3rd control |
| NH2-VLPAVAMLEER-COOH                   | * |                | PD 2nd control | PD 3rd control |
| NH2-YAALC<Cmm*>DVFVM<Mox>DAFGTA        | * |                | PD 2nd control |                |
| NH2-YAALC<Cmm*>DVFVMDAFGTAHR-CC        | * |                | PD 2nd control |                |
| NH2-AVITGDVTQIDLPR-COOH                | * |                |                |                |
| NH2-LLSLC<Cmm*>GPFDDNIK-COOH           | * |                |                |                |
| NH2-TPNQAQYIANILDHDITFGVGPAGTGK-C      | * |                |                |                |
| NH2-VLEQSAESVPEYGK-COOH                | * |                |                |                |
| #Gln->pyro-Glu (N-term Q)#-QC<Cmm*>N   | * |                |                |                |
| #Gln->pyro-Glu (N-term Q)#-QFQEALSR-CC | * |                |                |                |
| #Gln->pyro-Glu (N-term Q)#-QHLNLLHILAL | * |                |                |                |
| #Gln->pyro-Glu (N-term Q)#-QVDVLYR-CO  | * |                |                |                |
| #Gln->pyro-Glu (N-term Q)#-QVEAPDDWH   | * |                |                |                |
| NH2-AQPFAKPVANQR-COOH                  | * |                |                |                |
| NH2-AYDINLTDLLEEEIDPALGNGGLGR-COO      | * |                |                |                |
| NH2-DGRWEPEFTITGQAWDLPVVGYS-COO        | * |                |                |                |
| NH2-DKVLDAVLKELESGK-COOH               | * |                |                |                |
| NH2-DLFPEYHQLWPNK-COOH                 | * |                |                |                |
| NH2-EWANDLDQLINLEK-COOH                | * |                |                |                |

NH2-FHNVTNGITPR-COOH \*  
NH2-FNDGDFLR-COOH \*  
NH2-GYDPVKWR-COOH \*  
NH2-HM<Mox>QIINEINTR-COOH \*  
NH2-HMQIINEINTR-COOH \*  
NH2-HNEALDVQVGIGGK-COOH \*  
NH2-HVNYISMEFLIGR-COOH \*  
NH2-LAAC<Cmm\*>FLDSMATVGGQSATGYGL \*  
NH2-LIPAADISEQISTAGK-COOH \*  
NH2-LM<Mox>QQYFQC<Cmm\*>AC<Cmm \*  
NH2-LMQYFQC<Cmm\*>AC<Cmm\*>SVAD \*  
NH2-LTGNLLNLGWYQDVQDSLK-COOH \*  
NH2-LWQATHAHPFDLTK-COOH \*  
NH2-NIIFAINK-COOH \*  
NH2-QC<Cmm\*>NPALAALDK-COOH \*  
NH2-QFQEALSR-COOH \*  
NH2-QGGDPYLV<Mox>ADFAAYVEAQK-C \*  
NH2-QGGDPYLVADFAAYVEAQK-COOH \*  
NH2-QVEAPDDWHR-COOH \*  
NH2-SNYPWFR-COOH \*  
NH2-TFAYTNHTLM<Mox>PEALER-COOH \*  
NH2-TFAYTNHTLMPEALER-COOH \*  
NH2-TGIEINPQAIFDIQIK-COOH \*  
NH2-VADVINNDPLVGDK-COOH \*  
NH2-VADVINNDPLVGDKLK-COOH \*  
NH2-VFLFGAK-COOH \*  
NH2-VGEENIFIFGHTVEQVK-COOH \*  
NH2-VLDAVLKELESGK-COOH \*  
NH2-VLIDEHQM<Mox>SWDDAWAITSK-CO \*  
NH2-VLIDEHQMSWDDAWAITSK-COOH \*  
NH2-VVFLPDYC<Cmm\*>VSAAEK-COOH \*  
NH2-WEPEFTITGQAWDLPVVGYSR-COOH \*  
NH2-YGLNSAAEM<Mox>TPR-COOH \*  
NH2-YGLNSAAEMTPR-COOH \*  
NH2-YSDGDKHAFDQM<Mox>LHSIGK-COO \*  
NH2-YSDGDKHAFDQMLHSIGK-COOH \*  
NH2-ILEEAVSTALELASGK-COOH \*

NH2-AAVAGIAM<Mox>GLVK-COOH \*  
NH2-AAVAGIAMGLVK-COOH \*  
NH2-AKPGQDFPLTVNYQER-COOH \*  
NH2-ALTEETGTTIEIEDDGTVK-COOH \*  
NH2-DAQVLDELM<Mox>GER-COOH \*  
NH2-DAQVLDELMGER-COOH \*  
NH2-DGISALQM<Mox>DIK-COOH \*  
NH2-EIMQVALNQAK-COOH \*  
NH2-GETQALVTATLGAR-COOH \*  
NH2-GVLAVM<Mox>PDM<Mox>DKFPYTVI \*  
NH2-IEEITAEIEVGR-COOH \*  
NH2-IPGSFFR-COOH \*  
NH2-IVDFGAFVAIGGGK-COOH \*  
NH2-LHILGVM<Mox>EQAINAPR-COOH \*  
NH2-LHILGVMEQAINAPR-COOH \*  
NH2-VGYINDQYVLNPTQDELKESK-COOH \*  
NH2-VTDYLQM<Mox>GQEV PVK-COOH \*  
NH2-VTDYLQMGQEV PVK-COOH \*  
NH2-WDWQPEPVNEALNAR-COOH \*  
NH2-VINGFM<Mox>IQGGGFEPGM<Mox>K \*  
NH2-ADQEFDGLYNELLEMAR-COOH \*  
NH2-AQLAIYDIK-COOH \*  
NH2-DAEYDLVHEMEASLMELMSSSLK-COOH \*  
NH2-DMPNALVEVLR-COOH \*  
NH2-DVLLYPYHTFEHVLELLR-COOH \*  
NH2-EIANAQQGLPSGITLK-COOH \*  
NH2-ELSWLSFNER-COOH \*  
NH2-FDEEANIHWAK-COOH \*  
NH2-FLGIYSNNLDEFYK-COOH \*  
NH2-FVNLPEAPR-COOH \*  
NH2-GFFDYDALNAYSM<Mox>K-COOH \*  
NH2-GFFDYDALNAYSMK-COOH \*  
NH2-GMC<Cmm\*>SLIPNLEGISDNIR-COOH \*  
NH2-IEVATPLLDPR-COOH \*  
NH2-LLYEMVDR-COOH \*  
NH2-LYAASSSGVPVNULLVR-COOH \*  
NH2-LYTDYSLLTADAR-COOH \*

PD 2nd control

NH2-NQIFLINER-COOH \*

NH2-QASFDPSVLAIK-COOH \*

NH2-QHITPILINPDTDLVQFLK-COOH \*

NH2-QLSVNQQNWLR-COOH \*

NH2-VFNFIENPYRPVTFDYLM<Mox>VSPQN \*

NH2-VFNFIENPYRPVTFDYLMVSPQNSR-COOH \*

NH2-VLDIIDILFSDTVK-COOH \*

NH2-VLKADQEFDGLYNELLEM<Mox>AR-COOH \*

NH2-VLKADQEFDGLYNELLEMAR-COOH \*

NH2-VYLSSADWM<Mox>TR-COOH \*

NH2-VYLSSADWMTR-COOH \*

NH2-YALLEIPSDKVPR-COOH \*

NH2-YC<Cmm\*>LDDIFK-COOH \*

NH2-ATTLQAC<Cmm\*>LDEAGDNLAALR-COOH \*

NH2-TALLEKLEGQLATLR-COOH \*

NH2-AGQNAM<Mox>DATVLEITK-COOH \*

NH2-AGQNAMDATVLEITK-COOH \*

NH2-EEQHTPVSDISALTVGQALK-COOH \*

NH2-EVIAFLAER-COOH \*

NH2-FPHC<Cmm\*>FSAEGEAR-COOH \*

NH2-FPHC<Cmm\*>FSAEGEARPLK-COOH \*

NH2-IGIFQDLVDR-COOH \*

NH2-LYTSSWR-COOH \*

NH2-VAGEMNLSK-COOH \*

NH2-VDL DGNPC<Cmm\*>GELDEQHVEHAR-COOH \*

NH2-VQLNSGM<Mox>SLIVR-COOH \*

NH2-VQLNSGMSLIVR-COOH \*

NH2-YLYGVKPGATR-COOH \*

NH2-DAAYHFQGDADNDQLSVTPLVGLGK-COOH \*

NH2-DLQSIADYPVK-COOH \*

NH2-EALGVLFHK-COOH \*

NH2-GFIIDDSVLYSGASLNDVYLHQHDK-COOH \*

NH2-GILNALYEAK-COOH \*

NH2-IC<Cmm\*>IVALYLEQDDGGK-COOH \*

NH2-IGAAASNTNADWYC<Cmm\*>R-COOH \*

NH2-IIGALPYLYEINLR-COOH \*

NH2-ISQSVDDVDFYAPADFR-COOH \*

|                                   |   |                |                |
|-----------------------------------|---|----------------|----------------|
| NH2-ISQSVDDVDFFYAPADFRETLEK-COOH  | * |                |                |
| NH2-LDLENAILHDPQLELAPQR-COOH      | * |                |                |
| NH2-LQYYVNTDQLVVR-COOH            | * |                |                |
| NH2-LTIC<Cmm*>TPYFNLPAILVR-COOH   | * |                |                |
| NH2-LWKDDNTYHLK-COOH              | * |                |                |
| NH2-M<Mox>AQENPGVDVPVYGVPINTR-C   | * |                |                |
| NH2-MAQENPGVDVPVYGVPINTR-COOH     | * |                |                |
| NH2-NIIQLLR-COOH                  | * |                |                |
| NH2-TANDFYIPEDEPFK-COOH           | * |                |                |
| NH2-TIFHLM<Mox>PC<Cmm*>AEQK-COO   | * |                |                |
| NH2-SLELPAIVGTGVSQVK-COOH         | * |                |                |
| NH2-ATVFIFPDLNTGNTTYK-COOH        | * |                |                |
| NH2-LSGSVTVGETPVIR-COOH           | * |                | PD 3rd control |
| NH2-VGDTVIEFDLPLLEEK-COOH         | * | PD 1st control |                |
| NH2-M<Mox>FQQEVTITAPNGLHTR-COOH   | * |                |                |
| NH2-DDDPSFDELVALAVETGR-COOH       | * |                |                |
| NH2-GVLFLVDTWGGSPFNAASR-COOH      | * |                |                |
| NH2-IIVVSDEVAADTVR-COOH           | * | PD 1st control |                |
| NH2-ITSVNVGGMAFR-COOH             | * | PD 1st control |                |
| NH2-TLLTQVAPPGVTAHVVDVAK-COOH     | * | PD 1st control | PD 2nd control |
| NH2-TQVNNAVSVDEKDIEAFK-COOH       | * |                |                |
| NH2-TQVNNAVSVDEKDIEAFKK-COOH      | * |                |                |
| NH2-VM<Mox>LLFTNPTDVER-COOH       | * | PD 1st control | PD 2nd control |
| NH2-VMLLFTNPTDVER-COOH            | * |                | PD 2nd control |
| NH2-M<Mox>RAQAEK-COOH             | * |                |                |
| NH2-AVQLNSLSGFC<Cmm*>LTK-COOH     | * |                |                |
| NH2-ENVTSIINGVVLSPAALM<Mox>K-COO  | * |                |                |
| NH2-ENVTSIINGVVLSPAALMK-COOH      | * |                |                |
| NH2-EVTTTTPLAADDWK-COOH           | * |                |                |
| NH2-IVDLLTER-COOH                 | * |                |                |
| NH2-LDVLDGLK-COOH                 | * |                |                |
| NH2-LLLSEAC<Cmm*>PLILDYHVALDNAR-C | * |                |                |
| NH2-RIEELTGVPIIDIISTGPDR-COOH     | * |                | PD 2nd control |
| NH2-SGLPQAALNYIK-COOH             | * |                |                |
| NH2-TGWLDTVAVR-COOH               | * |                |                |
| NH2-TVLHLIPSGILR-COOH             | * |                | PD 2nd control |
| NH2-VGAGPFPELFDLDETGEFLC<Cmm*>K-C | * |                |                |



|                                  |   |                |
|----------------------------------|---|----------------|
| NH2-VGDLFDKETFAEK-COOH           | * |                |
| NH2-YVDYVLGILK-COOH              | * | PD 2nd control |
| NH2-AALTQPLNALR-COOH             | * |                |
| NH2-AGGPLYLYR-COOH               | * |                |
| NH2-IADTSLPLDELVADPVTAVEK-COOH   | * |                |
| NH2-LASLSSALLNSALQK-COOH         | * |                |
| NH2-LLANRPESALAVTLAR-COOH        | * |                |
| NH2-LTTDIGPVIDSEAK-COOH          | * |                |
| NH2-TFSNAIAEVR-COOH              | * |                |
| NH2-AAILPAAISFEQAAASFLK-COOH     | * |                |
| NH2-AIGINFIDTYIR-COOH            | * |                |
| NH2-LPLPTQYQTAIK-COOH            | * |                |
| NH2-ALQEASGFIR-COOH              | * |                |
| NH2-EIALILQR-COOH                | * |                |
| NH2-IVPELTFFYDNSLVEGM<Mox>R-COOH | * |                |
| NH2-IVPELTFFYDNSLVEGMR-COOH      | * |                |
| NH2-LGM<Mox>MTTVSGVEM<Mox>SR-CC  | * |                |
| NH2-LGM<Mox>MTTVSGVEMSR-COOH     | * |                |
| NH2-LGMM<Mox>TTVSGVEM<Mox>SR-CC  | * |                |
| NH2-LGMM<Mox>TTVSGVEMSR-COOH     | * |                |
| NH2-LGMMTTVSGVEM<Mox>SR-COOH     | * |                |
| NH2-LGMMTTVSGVEMSR-COOH          | * |                |
| NH2-MSNLVTSVVK-COOH              | * |                |
| NH2-MSNLVTSVVKHDEER-COOH         | * |                |
| NH2-RVNPDDSKED-COOH              | * |                |
| NH2-VAQEMQKEIALILQR-COOH         | * |                |
| NH2-VYVTFLNDKDEDAVK-COOH         | * |                |
| NH2-LFAEGFLVTEIAK-COOH           | * |                |
| NH2-AEIEGEIGDSHMGLAAR-COOH       | * |                |
| NH2-ALAAALGQIEK-COOH             | * | PD 1st control |
| NH2-IGVMFGNPETTTGGNALK-COOH      | * |                |
| NH2-IVEIYGPESSGK-COOH            | * |                |
| NH2-QSNTLLIFINQIR-COOH           | * |                |
| NH2-SGAVDVIVVDSVAALTPK-COOH      | * |                |
| NH2-TC<Cmm*>AFIDAEHALDPIYAR-COOH | * | PD 1st control |
| NH2-TTLTLQVIAAAQR-COOH           | * |                |
| NH2-TEIIIESEGEVAGIK-COOH         | * |                |

NH2-DSVIPAPEEGETATFIYVGR-COOH \*

NH2-GVAESTINVIFNPVETK-COOH \*

NH2-IAFIGEAVSGFGGMETVIR-COOH \*

NH2-IPASIDEFYQSK-COOH \*

NH2-LHVLGDGSDFEK-COOH \*

NH2-VKDLLDGLSQAK-COOH \*

NH2-AAATGEALSLVC<Cmm\*>VDEHK-COOH \*

NH2-AVAEQGYREPTPIQQQAIPAVLEGR-COOH \*

NH2-GGVDVLVATPGR-COOH \*

NH2-GLDIEELPHVVNYELPNVPEDYVHR-COOH \*

NH2-GNWQQVLVFTTR-COOH \*

NH2-IAIPGYEPDPSIKAEPINGR-COOH \*

NH2-IAIPGYEPDPSIK-COOH \*

NH2-LDQVEILVLDEADR-COOH \*

NH2-LLHNPLEIEVAR-COOH \*

NH2-NTASDQVTQHVHFVDK-COOH \*

NH2-QNLLFSATFSDDIK-COOH \*

NH2-SFDSLGLSPDILR-COOH \*

NH2-TAGFTLPLLQHLITR-COOH \*

NH2-VLVATDIAAR-COOH \*

NH2-DVIILLDSITR-COOH \*

NH2-ILFENLTPHANSR-COOH \*

NH2-KQDIIFAILK-COOH \*

NH2-NTPVSELITLGENM<Mox>GLENLAR-COOH \*

NH2-NTPVSELITLGENMGLENLAR-COOH \*

NH2-QDIIFAILK-COOH \*

NH2-VLDLASPIGR-COOH \*

NH2-AGQWQQVQLESWK-COOH \*

NH2-DLM<Mox>GC<Cmm\*>QVVTTEGYDLGK-COOH \*

NH2-DLMGC<Cmm\*>QVVTTEGYDLGK-COOH \*

NH2-LVPFLDGQVIK-COOH \*

NH2-LVPFLDGQVIKK-COOH \*

NH2-QLTAQAPVDPIVLGK-COOH \*

NH2-SIEVDWDPGF-COOH \*

NH2-SKQLTAQAPVDPIVLGK-COOH \*

NH2-VFSSTEDAESIFDYQPWFIQK-COOH \*

NH2-VVDM<Mox>M<Mox>ETGSNDVLVIK-COOH \*

|                                        |   |                |                               |
|----------------------------------------|---|----------------|-------------------------------|
| NH2-VVDM<Mox>METGSNDVLVIK-COOH         | * |                |                               |
| NH2-VVMMM<Mox>ETGSNDVLVIK-COOH         | * |                |                               |
| NH2-VVDMMETGSNDVLVIK-COOH              | * |                |                               |
| NH2-ANLVPHF-COOH                       | * |                |                               |
| NH2-AVDGEM<Mox>ITVTVEGKDEVFALSNI       | * |                |                               |
| NH2-AVDGEMITVTVEGK-COOH                | * |                |                               |
| NH2-AVDGEMITVTVEGKDEVFALSNIQK-COOH     | * |                |                               |
| NH2-DEVFALSNIQK-COOH                   | * |                |                               |
| NH2-FVGEEVTLVLR-COOH                   | * | PD 2nd control |                               |
| #Gln->pyro-Glu (N-term Q)#-QYDINEAIAL  | * |                |                               |
| NH2-AAGAELVGM<Mox>EDLADQIK-COOH        | * | PD 1st control | PD 3rd control                |
| NH2-AAGAELVGMEDLADQIK-COOH             | * | PD 1st control | PD 2nd control PD 3rd control |
| NH2-FVESVDVAVNLGIDAR-COOH              | * |                |                               |
| NH2-KVSISTTMGAGVAVDQAGLSASVN-COOH      | * |                |                               |
| NH2-QYDINEAIALLK-COOH                  | * | PD 2nd control | PD 3rd control                |
| NH2-VAVFTQGANAEEAAK-COOH               | * |                | PD 3rd control                |
| NH2-VGTVTPNVAEAVK-COOH                 | * |                |                               |
| NH2-VVGQLGQVLGPR-COOH                  | * | PD 1st control | PD 3rd control                |
| #Gln->pyro-Glu (N-term Q)#-QAIVAEVSEVA | * |                |                               |
| NH2-AAAFEGELIPASQIDR-COOH              | * | PD 1st control | PD 2nd control PD 3rd control |
| NH2-ALNLQDKQAIVAEVSEVAK-COOH           | * |                |                               |
| NH2-AVEGTPFEC<Cmm*>LK-COOH             | * |                |                               |
| NH2-DAFVGPTLIAYSM<Mox>EHPGAAAR-COOH    | * |                |                               |
| NH2-DAFVGPTLIAYSMEHPGAAAR-COOH         | * |                |                               |
| NH2-GALSAVVADSR-COOH                   | * |                |                               |
| NH2-LATLPTYEEAIAR-COOH                 | * | PD 2nd control | PD 3rd control                |
| NH2-QAIVAEVSEVAK-COOH                  | * |                | PD 3rd control                |
| NH2-RAVEGTPFEC<Cmm*>LK-COOH            | * |                |                               |
| NH2-AADM<Mox>TGADIEAM<Mox>TR-COOH      | * |                |                               |
| NH2-AADMTGADIEAMTR-COOH                | * |                |                               |
| NH2-AQLQEIAQTK-COOH                    | * |                |                               |
| NH2-GLPIPVVITVYADR-COOH                | * |                |                               |
| NH2-SFTFVTK-COOH                       | * |                |                               |
| NH2-SMGLVVED-COOH                      | * |                |                               |
| NH2-TPPAVLLK-COOH                      | * |                |                               |
| NH2-AEYTPHVDTGDYIIVLNADK-COOH          | * |                | PD 3rd control                |
| NH2-DWYVVDATGK-COOH                    | * |                | PD 3rd control                |

|                                      |   |                |                |
|--------------------------------------|---|----------------|----------------|
| NH2-QATFEEMIAR-COOH                  | * |                | PD 3rd control |
| NH2-RDWYVVDATGK-COOH                 | * |                | PD 3rd control |
| NH2-VYAGNEHNHAAQQPQVLDI-COOH         | * |                |                |
| NH2-FDGNAC<Cmm*>VLLNNNSEQPIGTR-COOH  | * |                | PD 3rd control |
| NH2-IISLAPEVL-COOH                   | * | PD 1st control |                |
| NH2-KGDVLK-COOH                      | * |                | PD 3rd control |
| NH2-M<Mox>IQEQTMLNVADNSGAR-COOH      | * |                | PD 3rd control |
| NH2-MIQEQTMLNVADNSGAR-COOH           | * |                |                |
| NH2-AAIEAAGGKIEE-COOH                | * |                |                |
| NH2-AANIIGIQIEFAK-COOH               | * |                |                |
| NH2-GFEGGQM<Mox>PLYR-COOH            | * |                |                |
| NH2-GFEGGQMPLYR-COOH                 | * |                |                |
| NH2-VEGGVVDLNTLK-COOH                | * |                |                |
| NH2-VILAGEVTPVTVR-COOH               | * | PD 1st control | PD 3rd control |
| NH2-GKGNVEYWVALIQPGK-COOH            | * |                |                |
| NH2-GLAQGTDVSFGSFLK-COOH             | * | PD 1st control | PD 3rd control |
| NH2-GNVEYWVALIQPGK-COOH              | * |                |                |
| NH2-VLYEM<Mox>DGVPEELAR-COOH         | * | PD 1st control | PD 3rd control |
| NH2-VLYEMDGVPEELAR-COOH              | * |                |                |
| NH2-AGDNAPM<Mox>AYIELVDR-COOH        | * | PD 1st control |                |
| NH2-AGDNAPMAYIELVDR-COOH             | * | PD 1st control |                |
| NH2-LFNELGPR-COOH                    | * |                | PD 3rd control |
| NH2-RVVEPLITLAK-COOH                 | * | PD 1st control | PD 3rd control |
| NH2-VVEPLITLAK-COOH                  | * | PD 1st control |                |
| NH2-LQAFEGVVIAIR-COOH                | * | PD 1st control | PD 3rd control |
| NH2-QDVPSFRPGDTVEVK-COOH             | * |                |                |
| NH2-VFQTHSPVDSISVK-COOH              | * | PD 1st control | PD 3rd control |
| NH2-AGDQIQSGVDAAIKPGNTLPM<Mox>R-COOH | * | PD 1st control |                |
| NH2-AGDQIQSGVDAAIKPGNTLPMR-COOH      | * | PD 1st control |                |
| NH2-ATLGEVGNAEHM<Mox>LR-COOH         | * |                |                |
| NH2-ATLGEVGNAEHMLR-COOH              | * | PD 1st control |                |
| NH2-DGAYVTLR-COOH                    | * |                |                |
| NH2-GKPFAPLLEK-COOH                  | * |                |                |
| NH2-HPVTPWGVQTK-COOH                 | * |                |                |
| NH2-NFGKHPVTPWGVQTK-COOH             | * |                |                |
| NH2-NKDGIPAVVER-COOH                 | * |                |                |
| NH2-SAGTYVQIVAR-COOH                 | * |                |                |

|                                    |   |                |                               |
|------------------------------------|---|----------------|-------------------------------|
| NH2-SANIALVLYK-COOH                | * | PD 1st control |                               |
| NH2-SANIALVLYKDGER-COOH            | * |                |                               |
| NH2-TDKFIVR-COOH                   | * |                |                               |
| NH2-YILAPK-COOH                    | * |                |                               |
| NH2-ILADIAVFDK-COOH                | * | PD 1st control | PD 2nd control PD 3rd control |
| NH2-ILADIAVFDKVAFTALVEK-COOH       | * |                |                               |
| NH2-VAFAQAVIK-COOH                 | * | PD 1st control |                               |
| NH2-VAFTALVEK-COOH                 | * | PD 1st control | PD 3rd control                |
| NH2-IGVFPVDGGVIK-COOH              | * | PD 1st control | PD 3rd control                |
| NH2-QWFTDVK-COOH                   | * |                |                               |
| NH2-IFVDEGPSMK-COOH                | * |                |                               |
| NH2-KVLESAIANAEHNDGADIDDLKVTK-COOH | * |                |                               |
| NH2-VLESAIANAEHNDGADIDDLK-COOH     | * |                | PD 3rd control                |
| NH2-VLESAIANAEHNDGADIDDLKVTK-COOH  | * |                | PD 3rd control                |
| NH2-VSQALDILTYTNK-COOH             | * |                | PD 3rd control                |
| NH2-VSQALDILTYTNKK-COOH            | * |                | PD 3rd control                |
| NH2-EAAIQVSNAIFNAATGK-COOH         | * | PD 1st control | PD 2nd control PD 3rd control |
| NH2-HQKVPALNQPGGIVEK-COOH          | * |                |                               |
| NH2-IRRDEDEVILTGGK-COOH            | * |                |                               |
| NH2-VIVEGINLVK-COOH                | * | PD 1st control | PD 3rd control                |
| NH2-VIVEGINLVKK-COOH               | * |                |                               |
| NH2-AANKFPAIYGGK-COOH              | * |                |                               |
| NH2-AEFYSEVLTIVVDGK-COOH           | * |                |                               |
| NH2-MFTINAEVR-COOH                 | * |                | PD 3rd control                |
| NH2-GAVPGATGSDLIVKPAVK-COOH        | * |                | PD 3rd control                |
| NH2-IFTEDGVSIPVTVIEVEANR-COOH      | * |                | PD 3rd control                |
| NH2-VTVQSLDVVR-COOH                | * |                | PD 3rd control                |
| NH2-ATLLGLGLR-COOH                 | * |                | PD 3rd control                |
| NH2-GM<Mox>INAVSFM<Mox>VK-COOH     | * |                | PD 3rd control                |
| NH2-GM<Mox>INAVSFMVK-COOH          | * |                |                               |
| NH2-GMINAVSFM<Mox>VK-COOH          | * |                |                               |
| NH2-GMINAVSFMVK-COOH               | * |                |                               |
| NH2-IKLVSSAGTGHFYTTTK-COOH         | * |                |                               |
| NH2-LVSSAGTGHFYTTTK-COOH           | * |                |                               |
| NH2-DAQSALTVSETTFGR-COOH           | * | PD 1st control | PD 3rd control                |
| NH2-DATGIDPVSLIAFDK-COOH           | * | PD 1st control | PD 3rd control                |
| NH2-DATGIDPVSLIAFDKVVM<Mox>TADAV   | * |                |                               |

|                                   |   |                               |
|-----------------------------------|---|-------------------------------|
| NH2-DATGIDPVSLIAFDKVVMTADAVK-COOH | * |                               |
| NH2-DFNEALVHQVVVAYAAGAR-COOH      | * | PD 3rd control                |
| NH2-SILSELVR-COOH                 | * |                               |
| NH2-ALLAAFDFPFR-COOH              | * |                               |
| NH2-ALLAAFDFPFRK-COOH             | * |                               |
| NH2-EQIIFPEIDYDKVDR-COOH          | * |                               |
| NH2-GLDITITTAK-COOH               | * |                               |
| NH2-ITLNMGVGEAIADKK-COOH          | * |                               |
| NH2-LITIAVPR-COOH                 | * | PD 3rd control                |
| NH2-LLDNAAADLAAISGQK-COOH         | * |                               |
| NH2-LLDNAAADLAAISGQKPLITK-COOH    | * | PD 1st control                |
| NH2-LMTEFNYSVMQVPR-COOH           | * |                               |
| NH2-M<Mox>WEFFER-COOH             | * |                               |
| NH2-MWEFFER-COOH                  | * |                               |
| NH2-ALLNSM<Mox>VIGVTEGFTK-COOH    | * |                               |
| NH2-ALLNSMVIGVTEGFTK-COOH         | * |                               |
| NH2-ALLNSMVIGVTEGFTKK-COOH        | * |                               |
| NH2-APVVVPAGVDVK-COOH             | * |                               |
| NH2-DGYADGWAQAGTAR-COOH           | * |                               |
| NH2-GADKQVIGQVAADLR-COOH          | * |                               |
| NH2-HADNTLTFGPR-COOH              | * |                               |
| NH2-KLQLVGVGYR-COOH               | * |                               |
| NH2-LQLVGVGYR-COOH                | * |                               |
| NH2-QVIGQVAADLR-COOH              | * |                               |
| NH2-TLNDAVEVK-COOH                | * |                               |
| NH2-ALEEAGAEVEVK-COOH             | * |                               |
| NH2-DLVESAPAALK-COOH              | * |                               |
| NH2-DQIIEAVAAM<Mox>SVM<Mox>DVVE   | * |                               |
| NH2-FGVSAAAVAVAAGPVEAAEEK-COOH    | * |                               |
| NH2-TEFDVILK-COOH                 | * |                               |
| NH2-DIADAVTAAGVEVAK-COOH          | * | PD 1st control PD 3rd control |
| NH2-INALETVTIASK-COOH             | * | PD 3rd control                |
| NH2-KNIEFFEAR-COOH                | * |                               |
| NH2-LAEVLAAANAR-COOH              | * |                               |
| NH2-LFGSIGTR-COOH                 | * |                               |
| NH2-M<Mox>QVILLDK-COOH            | * |                               |
| NH2-MQVILLDK-COOH                 | * |                               |

|                                       |   |                |                |
|---------------------------------------|---|----------------|----------------|
| NH2-NIEFFEAR-COOH                     | * |                |                |
| NH2-TTGEHEVSFQVHSEVFAK-COOH           | * |                |                |
| NH2-VANLGS LGDQVNVK-COOH              | * | PD 1st control | PD 3rd control |
| NH2-VIVNVVAE-COOH                     | * |                |                |
| #Gln->pyro-Glu (N-term Q)#-QAADHPVIAT | * |                |                |
| NH2-AALISALQTLYPEC<Cmm*>SIYDR-COO     | * |                |                |
| NH2-AEFVRDDVFK-COOH                   | * |                |                |
| NH2-ASLGETIDIVDHQGK-COOH              | * |                |                |
| NH2-DVQFIEQFR-COOH                    | * |                |                |
| NH2-EGM<Mox>ELTQGPVTGELPPALLPIEEH     | * |                |                |
| NH2-EGM<Mox>ELTQGPVTGELPPALLPIEEH     | * |                |                |
| NH2-EGMELTQGPVTGELPPALLPIEEHGM<M      | * |                |                |
| NH2-EGMELTQGPVTGELPPALLPIEEHGMK-      | * |                |                |
| NH2-FDVIVM<Mox>DPPK-COOH              | * |                |                |
| NH2-FDVIVM<Mox>DPPKFVENK-COOH         | * |                |                |
| NH2-FDVIVMDPPK-COOH                   | * |                |                |
| NH2-FGNFLVLQLLSAGA EYQR-COOH          | * |                |                |
| NH2-HPWVFSGAVAR-COOH                  | * |                |                |
| NH2-IIADAAIDAGR-COOH                  | * |                |                |
| NH2-LIAGESDGLPGITIDR-COOH             | * |                |                |
| NH2-QAADHPVIATYPEGLYLK-COOH           | * |                |                |
| NH2-RHPWVFSGAVAR-COOH                 | * |                |                |
| NH2-TGYILDQR-COOH                     | * |                |                |
| NH2-WRDWLAQK-COOH                     | * |                |                |
| NH2-LAGIGELITFEVK-COOH                | * |                |                |
| NH2-LDSEPALIALH SLLGR-COOH            | * |                |                |
| NH2-NYHVAESTPDSKPAM<Mox>VAEDYTN       | * |                |                |
| NH2-ELVELPPETSSK-COOH                 | * |                |                |
| NH2-FSGGEGINQWYNVTLTEGR-COOH          | * |                |                |
| NH2-GGWTELDLAQTNYLR-COOH              | * |                |                |
| NH2-GVQLEDGPAAFK-COOH                 | * |                |                |
| NH2-IRIDGHLISVR-COOH                  | * |                |                |
| NH2-LWEAVGVQVSR-COOH                  | * |                |                |
| NH2-VLAYYKPEGELC<Cmm*>TR-COOH         | * |                |                |
| NH2-DYLALVR-COOH                      | * |                |                |
| NH2-IVAITADEAGQR-COOH                 | * |                |                |
| NH2-LDRDTSGVLLVAK-COOH                | * |                |                |

|                                        |   |                |
|----------------------------------------|---|----------------|
| NH2-VAEREEEAVSPHLQK-COOH               | * |                |
| NH2-VHTQYAGHPHIAFDDR-COOH              | * |                |
| NH2-YAFATLVR-COOH                      | * |                |
| NH2-EMC<Cmm*>PYQTLNQR-COOH             | * |                |
| NH2-SKEM<Mox>C<Cmm*>PYQTLNQR-CC        | * |                |
| NH2-SKEMC<Cmm*>PYQTLNQR-COOH           | * |                |
| NH2-SQWLGGWR-COOH                      | * |                |
| NH2-AFTNYLPGFNIPM<Mox>LPR-COOH         | * |                |
| NH2-AFTNYLPGFNIPMLPR-COOH              | * |                |
| NH2-AVIKGETATRPQDEITVQM<Mox>AER-       | * |                |
| NH2-DVGDWLYAR-COOH                     | * |                |
| NH2-ELSDDL<Cmm*>SLR-COOH               | * |                |
| NH2-ESAEPEELVEPFLTR-COOH               | * |                |
| NH2-FAAEIVDISR-COOH                    | * |                |
| NH2-GETATRPQDEITVQMAER-COOH            | * |                |
| NH2-GEVLDIVAEPR-COOH                   | * |                |
| NH2-GFGFLEVDAQK-COOH                   | * |                |
| NH2-LVDNGAIAFIPAPFLHAVR-COOH           | * |                |
| NH2-VTDVIDVTIAEVR-COOH                 | * |                |
| NH2-AAPATPAAPAQPGLLSR-COOH             | * |                |
| NH2-APAPEYVPEAPR-COOH                  | * |                |
| NH2-QDIGEILIDNPK-COOH                  | * | PD 1st control |
| NH2-YPIVRPQDVQVEEQR-COOH               | * |                |
| #Gln->pyro-Glu (N-term Q)#-QPIFDLFDVEN | * |                |
| NH2-ESIEHVLC<Cmm*>NEC<Cmm*>PTC<C       | * |                |
| NH2-LTTDITLPSR-COOH                    | * |                |
| NH2-NLDDTIFNTNIEATQAIAR-COOH           | * |                |
| NH2-QPIFDLFDVENEIQR-COOH               | * |                |
| NH2-TAAEGVGEAELASDAAYLK-COOH           | * |                |
| NH2-TAAEGVGEAELASDAAYLKR-COOH          | * |                |
| NH2-TAELLNVTPSETR-COOH                 | * |                |
| NH2-TSVNGFSALGLVEM<Mox>TR-COOH         | * |                |
| NH2-TSVNGFSALGLVEMTR-COOH              | * |                |
| NH2-TVETVC<Cmm*>YEIM<Mox>R-COOH        | * |                |
| NH2-VAYIDGGILQEIHIER-COOH              | * |                |
| NH2-VLPGM<Mox>QAAFVDIGLDK-COOH         | * |                |
| NH2-VVAEYC<Cmm*>DEQGGFIIR-COOH         | * |                |



NH2-YQLYGELALAQR-COOH \*  
#Gln->pyro-Glu (N-term Q)#-QYGDFDRYVL \*  
NH2-ADAINAPLSANSFLPQPHPGNC<Cmm\* \*  
NH2-ADFLTVHGLWPGLPK-COOH \*  
NH2-FGC<Cmm\*>ATRPINLPEAR-COOH \*  
NH2-FLADNYGK-COOH \*  
NH2-HGAC<Cmm\*>FGFDPDAYFGTMVR-CC \*  
NH2-LSEVM<Mox>PGAGGR-COOH \*  
NH2-LSEVMPGAGGR-COOH \*  
NH2-LTC<Cmm\*>QGNPAYLTEIQISIK-COOH \*  
NH2-M<Mox>C<Cmm\*>SSPETGLSLETAAK- \*  
NH2-MC<Cmm\*>SSPETGLSLETAAK-COOH \*  
NH2-RDFDAAFK-COOH \*  
NH2-YVLALSWQTGFC<Cmm\*>QSQHDR-CC \*  
#Gln->pyro-Glu (N-term Q)#-QC<Cmm\*>Y \*  
NH2-ADEATRDVADWLK-COOH \*  
NH2-C<Cmm\*>DFM<Mox>LDQVGNVFK-CC \*  
NH2-C<Cmm\*>DFMLDQVGNVFK-COOH \*  
NH2-DELADELHIEGEEQLEGLR-COOH \*  
NH2-DELADELHIEGEEQLEGLRR-COOH \*  
NH2-DFDDAVYC<Cmm\*>EK-COOH \*  
NH2-DGQLVFTR-COOH \*  
NH2-DGYGFLR-COOH \*  
NH2-DLPLVTIDGEDAR-COOH \*  
NH2-DLPLVTIDGEDARDFDDAVYC<Cmm\*>f \*  
NH2-DVADWLK-COOH \*  
NH2-DYAEELLESVADRPDAEM<Mox>LQTM< \*  
NH2-DYAEELLESVADRPDAEM<Mox>LQTML \*  
NH2-DYAEELLESVADRPDAEMLQTM<Mox>L \*  
NH2-DYAEELLESVADRPDAEMLQTMILLR-COC \*  
NH2-EFILEHLTK-COOH \*  
NH2-EQGHQGNTTETGGYHYSM<Mox>EEM \*  
NH2-EQGHQGNTTETGGYHYSM<Mox>EEM \*  
NH2-FDQVGQR-COOH \*  
NH2-FIFNAER-COOH \*  
NH2-FYEAVM<Mox>SSHAR-COOH \*  
NH2-FYEAVMSSHAR-COOH \*

NH2-GGISFESEEA-K-COOH \*  
NH2-GHFGLALQSYAHFTSPIR-COOH \*  
NH2-GVISSVTGFGFFVR-COOH \*  
NH2-HLEELHNLYK-COOH \*  
NH2-IDFSLISSER-COOH \*  
NH2-IHDKPSTEAITFR-COOH \*  
NH2-IVEVLGDNM<Mox>GTGM<Mox>AVD \*  
NH2-IVEVLGDNM<Mox>GTGMAVDIALR-COOH \*  
NH2-IVEVLGDNMGTGM<Mox>AVDIALR-COOH \*  
NH2-IVEVLGDNMGTGMAVDIALR-COOH \*  
NH2-KDDLYSSEQM<Mox>K-COOH \*  
NH2-KDDLYSSEQMK-COOH \*  
NH2-KIDFSLISSER-COOH \*  
NH2-KVNFEPDSAFR-COOH \*  
NH2-KVNFEPDSAFRGEK-COOH \*  
NH2-LC<Cmm\*>M<Mox>VC<Cmm\*>EM<Mox>TV \*  
NH2-LC<Cmm\*>M<Mox>VC<Cmm\*>EMTV \*  
NH2-LC<Cmm\*>MVC<Cmm\*>EM<Mox>TV \*  
NH2-LC<Cmm\*>MVC<Cmm\*>EMTVSSK-COOH \*  
NH2-LDDLFDGLVHVSSLDNDYYR-COOH \*  
NH2-LIEEC<Cmm\*>M<Mox>ILANISAAR-COOH \*  
NH2-LIEEC<Cmm\*>MILANISAAR-COOH \*  
NH2-LM<Mox>GESSGQTYR-COOH \*  
NH2-LMGESSGQTYR-COOH \*  
NH2-LSFDILIPPDQIM<Mox>GAR-COOH \*  
NH2-LSFDILIPPDQIMGAR-COOH \*  
NH2-LWVAIADVSYYVR-COOH \*  
NH2-LWVAIADVSYYVRPSTPLDR-COOH \*  
NH2-M<Mox>GFVVVELTQRPTR-COOH \*  
NH2-MGFVVVELTQRPTR-COOH \*  
NH2-QAIYDPENR-COOH \*  
NH2-QC<Cmm\*>YALPERLDLVK-COOH \*  
NH2-RQC<Cmm\*>YALPERLDLVK-COOH \*  
NH2-SQDPFQER-COOH \*  
NH2-SVLAELGLELPGGNKPEPR-COOH \*  
NH2-TC<Cmm\*>IHGDQVLAQPLGADR-COOH \*  
NH2-TC<Cmm\*>IHGDQVLAQPLGADR-COOH \*

|                                       |   |                |
|---------------------------------------|---|----------------|
| NH2-THEIPYIWPQAVEQQVAGLK-COOH         | * |                |
| NH2-THEIPYIWPQAVEQQVAGLKEEVPEEAK      | * |                |
| NH2-VEAVNMDER-COOH                    | * |                |
| NH2-VNFEPDSAFR-COOH                   | * |                |
| NH2-VNFEPDSAFRGEK-COOH                | * |                |
| NH2-VWHILQGDQDLR-COOH                 | * |                |
| NH2-VWHILQGDQDLREQYAPLVK-COOH         | * |                |
| NH2-YANPIPSR-COOH                     | * |                |
| NH2-YFTEAGVGFVVPDDSR-COOH             | * |                |
| NH2-YPDLTLHR-COOH                     | * |                |
| NH2-PILDIALQYR-COOH                   | * |                |
| NH2-QFAQTPALYR-COOH                   | * |                |
| NH2-SPEWSAFGIRPPLR-COOH               | * |                |
| NH2-AATILAEQLEAFVDLR-COOH             | * |                |
| NH2-AEAIHYIGDLVQR-COOH                | * |                |
| NH2-EEKPEFDPILLRPVDDLELTVR-COOH       | * |                |
| NH2-EGVQEDILEILLNLK-COOH              | * |                |
| NH2-IAYNVEAAR-COOH                    | * |                |
| NH2-ILLSSM<Mox>PGC<Cmm*>AVTEVEID      | * |                |
| NH2-ILLSSMPGC<Cmm*>AVTEVEIDGVLHE      | * |                |
| NH2-LLVDAC<Cmm*>YSPVER-COOH           | * | PD 1st control |
| NH2-M<Mox>QGSVTEFLKPR-COOH            | * |                |
| NH2-MQGSVTEFLKPR-COOH                 | * |                |
| NH2-RAATILAEQLEAFVDLR-COOH            | * |                |
| NH2-SLTEIKDVLASR-COOH                 | * |                |
| NH2-TDLDKLVIEM<Mox>ETNGTIDPEEAIK-COOH | * |                |
| NH2-VQGKDEVILTLNK-COOH                | * |                |
| NH2-VTLEPLER-COOH                     | * |                |
| NH2-ALEIEEM<Mox>QLK-COOH              | * |                |
| NH2-ALEIEEMQLK-COOH                   | * |                |
| NH2-AVAVDSGVTAVAK-COOH                | * |                |
| NH2-AVLVAGGVEAEKLDK-COOH              | * |                |
| NH2-EFFGSSQLSQFM<Mox>DQNNPLSEITH      | * |                |
| NH2-FIEQDPEGQYGLEAAFR-COOH            | * |                |
| NH2-FTTIHIQELAC<Cmm*>VSR-COOH         | * |                |
| NH2-GDVLADGPSTDLGELALGQNM<Mox>F       | * |                |
| NH2-GDVLADGPSTDLGELALGQNM-R-COOH      | * |                |

NH2-GGVVQYVDASRIVIKVNEDEM<Mox>YF\*

NH2-GM<Mox>PIATPVFDGAK-COOH \*

NH2-GMPIATPVFDGAK-COOH \*

NH2-GSWLDFEFDPK-COOH \*

NH2-IETLFTNDLDHGPIYSETLR-COOH \*

NH2-INPIEDM<Mox>PYDENGTPVDIVLNPLC\*

NH2-ISALGPGGLTR-COOH \*

NH2-ITQGDDLAPGVLK-COOH \*

NH2-KLPATIILR-COOH \*

NH2-LDESGIVYIGAEVTGGDILVGK-COOH \*

NH2-LGDLPTSGQIR-COOH \*

NH2-LGEPVFDVQEC<Cmm\*>QIR-COOH \*

NH2-LGPEEITADIPNVGEAALSK-COOH \*

NH2-LIEVPVEYIAGK-COOH \*

NH2-LPATIILR-COOH \*

NH2-LQMELVPER-COOH \*

NH2-LRGETASFDIEANGK-COOH \*

NH2-LSALVEIYR-COOH \*

NH2-LSLGLDTLM<Mox>PQDM<Mox>INA\*

NH2-MNIGQILETHLGM<Mox>AAK-COOH \*

NH2-QKVDLSTFSDEEVM<Mox>R-COOH \*

NH2-QKVDLSTFSDEEVMR-COOH \*

NH2-SNQNTC<Cmm\*>INQM<Mox>PC<Cm\*

NH2-SPGVFFDSDK-COOH \*

NH2-SPGVFFDSDKGK-COOH \*

NH2-STGSYSLVTQQPLGGK-COOH \*

NH2-SVFPIQSYSGNSELQYVSYR-COOH \*

NH2-SVGEMAENQFR-COOH \*

NH2-TGEQFERPVTVGYM<Mox>YM<Mox>L\*

NH2-VDLSTFSDEEVMR-COOH \*

NH2-VNEDEMYPGEAGIDIYNLTK-COOH \*

NH2-VPNGVSGTVIDVQVFTR-COOH \*

#Gln->pyro-Glu (N-term Q)#-QTDELTLGSSL\*

NH2-AILWM<Mox>IVPK-COOH \*

NH2-AILWMIVPK-COOH \*

NH2-AIVQLEDGVQISSGDTLAR-COOH \*

NH2-AM<Mox>M<Mox>DNLQTETVINR-CC\*

PD 1st control PD 2nd control

|                                  |   |                |
|----------------------------------|---|----------------|
| NH2-AM<Mox>MDNLQTETVINR-COOH     | * |                |
| NH2-AMM<Mox>DNLQTETVINR-COOH     | * |                |
| NH2-AMM<Mox>DNLQTETVINRDGQEEK-C  | * |                |
| NH2-AMMDNLQTETVINR-COOH          | * |                |
| NH2-ASLATESFISAASFQETTR-COOH     | * |                |
| NH2-ATIVNAGSSDFLEGEQVEYSR-COOH   | * |                |
| NH2-DLLGITK-COOH                 | * |                |
| NH2-EGLNVLQYFISTHGAR-COOH        | * |                |
| NH2-EPAILAEISGIVSFGK-COOH        | * |                |
| NH2-ESYKVPYGAVLAK-COOH           | * |                |
| NH2-FATSDLNDLYR-COOH             | * |                |
| NH2-FTDM<Mox>IDGQTITR-COOH       | * |                |
| NH2-FTDMIDGQTITR-COOH            | * |                |
| NH2-GDVISDGPEAPHDILR-COOH        | * |                |
| NH2-GEAIGVIAAQSIGEPGTQLTMR-COOH  | * |                |
| NH2-GLM<Mox>AKPDGSIETPITANFR-COO | * |                |
| NH2-GLMAKPDGSIETPITANFR-COOH     | * |                |
| NH2-GLPYSIVNQALGK-COOH           | * |                |
| NH2-IALASPDM<Mox>IR-COOH         | * |                |
| NH2-IALASPDMIR-COOH              | * |                |
| NH2-IFGPVKDYEC<Cmm*>LC<Cmm*>GK-C | * |                |
| NH2-IGLLLDM<Mox>PLRDIER-COOH     | * |                |
| NH2-IGLLLDMPLR-COOH              | * |                |
| NH2-IGLLLDMPLRDIER-COOH          | * |                |
| NH2-IVDAQGNDVLIPGTDM<Mox>PAQYFLI | * |                |
| NH2-IVDAQGNDVLIPGTDMPAQYFLPGK-CC | * |                |
| NH2-KATIVNAGSSDFLEGEQVEYSR-COOH  | * |                |
| NH2-LGIQAFEPVLIIEGK-COOH         | * |                |
| NH2-LIPAGTGYAYHQDR-COOH          | * |                |
| NH2-LLDLAAPDIIVR-COOH            | * | PD 1st control |
| NH2-LVITPVDGSDPYEEM<Mox>IPK-COOH | * |                |
| NH2-LVITPVDGSDPYEEMIPK-COOH      | * |                |
| NH2-M<Mox>GAELIALLK-COOH         | * |                |
| NH2-M<Mox>LQEAVDALLDNGR-COOH     | * |                |
| NH2-M<Mox>LQEAVDALLDNGRR-COOH    | * |                |
| NH2-MALELFKPFYIGK-COOH           | * |                |
| NH2-MGAEIALLK-COOH               | * |                |

NH2-MLQEAVDALLDNGR-COOH \*  
 NH2-MLQEAVDALLDNGRR-COOH \*  
 NH2-NTLLHEQWC<Cmm\*>DLLEENSVDAVK \*  
 NH2-PDGSIIETPITANFR-COOH \*  
 NH2-PGTADILVPR-COOH \*  
 NH2-QLNVFEGER-COOH \*  
 NH2-QTDELTLGLSSLVVLDSAER-COOH \*  
 NH2-QVSFNSIYM<Mox>M<Mox>ADSGAR- \*  
 NH2-QVSFNSIYMM<Mox>ADSGAR-COOH \*  
 NH2-QVSFNSIYMMADSGAR-COOH \*  
 NH2-RLVITPVDGSDPYEEMIPK-COOH \*  
 NH2-SGASVGIDDM<Mox>VIPEK-COOH \*  
 NH2-SGASVGIDDMVIPEK-COOH \*  
 NH2-SGASVGIDDMVIPEKK-COOH \*  
 NH2-SM<Mox>DLEQEC<Cmm\*>EQLREELN \*  
 NH2-SVITVGPYLR-COOH \*  
 NH2-SVVSC<Cmm\*>DTDFGVC<Cmm\*>AH \*  
 NH2-SWSFGEVK-COOH \*  
 NH2-VADLFEAR-COOH \*  
 NH2-VIDIWAAANDR-COOH \*  
 NH2-VTAEDVLKPGTADILVPR-COOH \*  
 NH2-YIVNEVQDVYR-COOH \*  
 NH2-VPLPPLTEER-COOH \*  
 #Acetyl (Protein N-term)#-MTESFAQLFEES \*  
 #Acetyl (Protein N-term)#-MTESFAQLFEES \*  
 #Acetyl (Protein N-term)#-TESFAQLFEESLK \*  
 #Acetyl (Protein N-term)#-TESFAQLFEESLK \*  
 #Gln->pyro-Glu (N-term Q)#-QLAEDPFNNV \*  
 #Gln->pyro-Glu (N-term Q)#-QLAEDPFNNV \*  
 #Gln->pyro-Glu (N-term Q)#-QLGEDPWVA \*  
 NH2-AFLPGSLVDVR-COOH \*  
 NH2-AFLPGSLVDVRPVR-COOH \*  
 NH2-AFLPGSLVDVRPVRDTLHLEGK-COOH \*  
 NH2-AKDEADEKDAIATVNK-COOH \*  
 NH2-ANPWQQFAETHNK-COOH \*  
 NH2-ANPWQQFAETHNKGDR-COOH \*  
 NH2-ANPWQQFAETHNKGDRVEGK-COOH \*

PD 3rd control

PD 1st control PD 2nd control

|                                    |   |                               |
|------------------------------------|---|-------------------------------|
| NH2-AVIESENSAER-COOH               | * |                               |
| NH2-AVIESENSAERDQLLENLQEGM<Mox>E   | * | PD 2nd control                |
| NH2-AVIESENSAERDQLLENLQEGMEVK-COOH | * | PD 2nd control                |
| NH2-AYEDAETVTGVINGK-COOH           | * |                               |
| NH2-DAIATVVKQEDANFSNNAM<Mox>AE     | * |                               |
| NH2-DAIATVVKQEDANFSNNAMAEAFK-COOH  | * |                               |
| NH2-DQLLENLQEGM<Mox>EVK-COOH       | * |                               |
| NH2-DQLLENLQEGMEVK-COOH            | * |                               |
| NH2-DRVEDATLVLSVGDEVEAK-COOH       | * | PD 1st control PD 2nd control |
| NH2-DTLHLEGK-COOH                  | * |                               |
| NH2-DTLHLEGKELEFK-COOH             | * |                               |
| NH2-DVVLVDAGLK-COOH                | * |                               |
| NH2-EIETRPGSIVR-COOH               | * |                               |
| NH2-ELEFK-COOH                     | * |                               |
| NH2-EYKKGDEIAAVVLQVDAER-COOH       | * |                               |
| NH2-FTGVDR-COOH                    | * |                               |
| NH2-FTGVDRK-COOH                   | * |                               |
| NH2-GAIVTGK-COOH                   | * |                               |
| NH2-GATVELADGVEGYLR-COOH           | * | PD 1st control PD 2nd control |
| NH2-GDEIAAVVLQVDAER-COOH           | * |                               |
| NH2-GDEIAAVVLQVDAERER-COOH         | * |                               |
| NH2-GGFTVELNGIR-COOH               | * |                               |
| NH2-GVVVAIDK-COOH                  | * |                               |
| NH2-GVVVAIDKDVLVDAGLK-COOH         | * |                               |
| NH2-GVVVAIDKDVLVDAGLKSESAIPAEQFK   | * |                               |
| NH2-HEAWITLEK-COOH                 | * |                               |
| NH2-HPSEIVNVGDEITVK-COOH           | * |                               |
| NH2-ISLGLK-COOH                    | * |                               |
| NH2-ISLGVKQLAEDPFNNWVALNK-COOH     | * |                               |
| NH2-KGDEIAAVVLQVDAER-COOH          | * |                               |
| NH2-KGDEIAAVVLQVDAERER-COOH        | * |                               |
| NH2-M<Mox>TESFAQLFEESLK-COOH       | * |                               |
| NH2-M<Mox>TESFAQLFEESLKEIETR-COOH  | * |                               |
| NH2-M<Mox>TESFAQLFEESLKEIETRPGSIVR | * |                               |
| NH2-MTESFAQLFEESLK-COOH            | * |                               |
| NH2-MTESFAQLFEESLKEIETR-COOH       | * |                               |
| NH2-MTESFAQLFEESLKEIETRPGSIVR-COOH | * |                               |

NH2-NAQGELEIQVGDEVDVALDAVEDGFGE\*  
NH2-NLTDYGAFVDLGGVDGLLHITDM<Mox>\*  
NH2-NLTDYGAFVDLGGVDGLLHITDM<Mox>\*  
NH2-NLTDYGAFVDLGGVDGLLHITDMAWK-\*  
NH2-NNVVVSR-COOH\*  
NH2-QEDANFSNNAM<Mox>AEAFK-COOH\*  
NH2-QEDANFSNNAMAEAFK-COOH\*  
NH2-QLAEDPFNNWVALNK-COOH\*  
NH2-QLAEDPFNNWVALNKK-COOH\*  
NH2-QLGEDPWVAIAK-COOH\*  
NH2-RAVIESENSAER-COOH\*  
NH2-RAVIESENSAERDQLLENLQEGM<Mox>\*  
NH2-RAVIESENSAERDQLLENLQEGMEVK-C\*  
NH2-RHEAWITLEK-COOH\*  
NH2-RNNVVVSR-COOH\*  
NH2-RYPEGTK-COOH\*  
NH2-SESAIPAEQFK-COOH\*  
NH2-SITDFGIFIGLDGGIDGLVHLSDISWNVAC\*  
NH2-TESSFAQLFEESLK-COOH\*  
NH2-TESSFAQLFEESLKEIETR-COOH\*  
NH2-TESSFAQLFEESLKEIETRPGSIVR-COOH\*  
NH2-TRVSLGLK-COOH\*  
NH2-VEDATLVLSVGDEVEAK-COOH\*  
NH2-VIKLDQK-COOH\*  
NH2-VKGGFTVELNGIR-COOH\*  
NH2-VKHPSEIVNVGDEITVK-COOH\*  
NH2-VSLGLKQLGEDPWVAIAK-COOH\*  
NH2-VTAVDAK-COOH\*  
NH2-VTAVDAK GATVELADGVEGYLR-COOH\*  
NH2-VTNLTDYGC<Cmm\*>FVEIEEGVEGLVH\*  
NH2-VTNLTDYGC<Cmm\*>FVEIEEGVEGLVH\*  
NH2-VVNVGDVVEVM<Mox>VLDIDEER-CO\*  
NH2-VVNVGDVVEVM<Mox>VLDIDEERR-CO\*  
NH2-VVNVGDVVEVM<Mox>VLDIDEERRR-C\*  
NH2-VVNVGDVVEVMVLDIDEER-COOH\*  
NH2-VVNVGDVVEVMVLDIDEERR-COOH\*  
NH2-VVNVGDVVEVMVLDIDEERRR-COOH\*

PD 2nd control

PD 1st control

PD 3rd control



|                                       |   |                |                |
|---------------------------------------|---|----------------|----------------|
| NH2-DQYEIR-COOH                       | * |                |                |
| NH2-ERFTVLISPHVNK-COOH                | * |                |                |
| NH2-FTVLISPHVNK-COOH                  | * |                |                |
| NH2-FTVLISPHVNKDAR-COOH               | * |                |                |
| NH2-GPIPLPTR-COOH                     | * |                |                |
| NH2-GPIPLPTRK-COOH                    | * |                |                |
| NH2-LIDQATAEIVETAK-COOH               | * | PD 1st control | PD 3rd control |
| NH2-LIDQATAEIVETAKR-COOH              | * |                | PD 3rd control |
| NH2-LKAFDHR-COOH                      | * |                |                |
| NH2-LVDIVEPTEK-COOH                   | * |                | PD 3rd control |
| NH2-LVDIVEPTEKTVDALM<Mox>R-COOH       | * |                |                |
| NH2-LVDIVEPTEKTVDALMR-COOH            | * |                |                |
| NH2-TVDALM<Mox>R-COOH                 | * |                |                |
| NH2-TVDALMR-COOH                      | * |                |                |
| #Gln->pyro-Glu (N-term Q)#-QGNALGWAT  | * |                |                |
| #Gln->pyro-Glu (N-term Q)#-QVSDGVAHIH | * |                |                |
| NH2-ALNAAGFR-COOH                     | * |                |                |
| NH2-C<Cmm*>ADAVKEYGIK-COOH            | * |                |                |
| NH2-KQVSDGVAHIHASFNNTIVTITDR-COOH     | * |                |                |
| NH2-KSTPFAAQVAAER-COOH                | * |                |                |
| NH2-NLEVM<Mox>VK-COOH                 | * |                |                |
| NH2-NLEVMVK-COOH                      | * |                |                |
| NH2-QGNALGWATAGGSGFR-COOH             | * |                | PD 3rd control |
| NH2-QVSDGVAHIHASFNNTIVTITDR-COOH      | * |                |                |
| NH2-STPFAAQVAAER-COOH                 | * |                |                |
| NH2-ATVNQLVR-COOH                     | * |                |                |
| NH2-GALDC<Cmm*>SGVK-COOH              | * |                |                |
| NH2-GALDC<Cmm*>SGVKDR-COOH            | * |                |                |
| NH2-LTNGFEVTSYIGGEGHNLQEHSVILIR-CC    | * |                |                |
| NH2-SNVPALAEAC<Cmm*>PQK-COOH          | * |                |                |
| NH2-SNVPALAEAC<Cmm*>PQKR-COOH         | * |                |                |
| NH2-VKD<#Methylthio (D)#>LPGVR-COOH   | * |                |                |
| NH2-VKDLPGVR-COOH                     | * |                |                |
| NH2-VRLTNGFEVTSYIGGEGHNLQEHSVILIR-    | * |                |                |
| NH2-AILAAAGIAEDVK-COOH                | * | PD 1st control | PD 3rd control |
| NH2-AILAAAGIAEDVKISELSEGQIDTLR-COO    | * |                |                |
| NH2-AILAAAGIAEDVKISELSEGQIDTLRDEVA    | * |                |                |

|                                                 |   |                |                |
|-------------------------------------------------|---|----------------|----------------|
| NH2-EISM<Mox>SIK-COOH                           | * |                |                |
| NH2-EISM<Mox>SIKR-COOH                          | * |                |                |
| NH2-EISMSIK-COOH                                | * |                |                |
| NH2-EISMSIKR-COOH                               | * |                |                |
| NH2-FVVEGDLR-COOH                               | * |                |                |
| NH2-FVVEGDLR-COOH                               | * |                |                |
| NH2-HAVIALTSIYGVGK-COOH                         | * | PD 1st control | PD 3rd control |
| NH2-HAVIALTSIYGVGKTR-COOH                       | * |                |                |
| NH2-IAGINIPDHK-COOH                             | * |                |                |
| NH2-IAGINIPDHKHAVIALTSIYGVGK-COOH               | * |                |                |
| NH2-IELSEGQIDTLR-COOH                           | * |                |                |
| NH2-IELSEGQIDTLRDEVAK-COOH                      | * | PD 1st control | PD 3rd control |
| NH2-IELSEGQIDTLRDEVAKFVVEGDLR-COOH              | * |                |                |
| NH2-LM<Mox>DLGC<Cmm*>YR-COOH                    | * |                |                |
| NH2-LMDLGC<Cmm*>YR-COOH                         | * |                |                |
| NH2-REISMSIK-COOH                               | * |                |                |
| NH2-RLM<Mox>DLGC<Cmm*>YR-COOH                   | * |                |                |
| NH2-RLMDLGC<Cmm*>YR-COOH                        | * |                |                |
| NH2-SKAILAAAGIAEDVK-COOH                        | * |                |                |
| NH2-SKAILAAAGIAEDVKIELSEGQIDTLR-COOH            | * |                |                |
| #Gln->pyro-Glu (N-term Q)#-QTGRPHGFLR           | * |                |                |
| NH2-AELKAIISDVNASDEDRWNAVVK-COOH                | * |                |                |
| NH2-AIISDVNASDEDR-COOH                          | * |                |                |
| NH2-AIISDVNASDEDRWNAVVK-COOH                    | * |                |                |
| NH2-GEIPGLKK-COOH                               | * |                |                |
| NH2-RVALADKYFAK-COOH                            | * |                |                |
| NH2-VALADKYFAK-COOH                             | * |                |                |
| #Acetyl (Protein N-term)#-SLSTEATAKIVSEFGR-COOH | * |                |                |
| NH2-DANDTGSTEVQVALLTAQINHLQGHFAIK-COOH          | * |                |                |
| NH2-DANDTGSTEVQVALLTAQINHLQGHFAIK-COOH          | * |                |                |
| NH2-IVSEFGR-COOH                                | * |                |                |
| NH2-KLLDYLK-COOH                                | * |                |                |
| NH2-KLLDYLKR-COOH                               | * |                |                |
| NH2-LLDYLK-COOH                                 | * |                |                |
| NH2-LLDYLKR-COOH                                | * |                |                |
| NH2-SLSTEATAK-COOH                              | * |                |                |
| NH2-SLSTEATAKIVSEFGR-COOH                       | * |                |                |

|                                      |   |                |
|--------------------------------------|---|----------------|
| NH2-YTQLIER-COOH                     | * |                |
| NH2-EEGTRLDLDR-COOH                  | * |                |
| NH2-IAHWVGQGATISDR-COOH              | * |                |
| NH2-IAHWVGQGATISDRVAALIK-COOH        | * |                |
| NH2-KRPFYQVVVADSR-COOH               | * |                |
| NH2-PFYQVVVADSR-COOH                 | * |                |
| NH2-RPFYQVVVADSR-COOH                | * |                |
| NH2-VAALIK-COOH                      | * |                |
| NH2-VAALIKEVNK-COOH                  | * |                |
| NH2-VGFFNPIASEK-COOH                 | * | PD 3rd control |
| NH2-VGFFNPIASEKEEGTR-COOH            | * |                |
| NH2-VGFFNPIASEKEEGTRLDLDR-COOH       | * |                |
| NH2-FVKHPHYGK-COOH                   | * |                |
| NH2-HPIYGK-COOH                      | * |                |
| NH2-LHVHDENNEC<Cmm*>GIGDVVEIR-CC     | * |                |
| NH2-SIVVAIER-COOH                    | * |                |
| NH2-SWTLVR-COOH                      | * |                |
| NH2-TKSWTLVR-COOH                    | * |                |
| NH2-TTKLHVHDENNEC<Cmm*>GIGDVVEIF     | * |                |
| NH2-VVSDK-COOH                       | * |                |
| NH2-VVSDKM<Mox>EK-COOH               | * |                |
| NH2-VVSDKMEKSIVVAIER-COOH            | * |                |
| NH2-ARYLSLLPYTDR-COOH                | * |                |
| NH2-DIATLK-COOH                      | * |                |
| NH2-FTAEGVQEIDYK-COOH                | * | PD 3rd control |
| NH2-FTAEGVQEIDYKDIATLK-COOH          | * | PD 1st control |
| NH2-FTAEGVQEIDYKDIATLKNYITESGK-COC   | * |                |
| NH2-IVPSR-COOH                       | * |                |
| NH2-NYITESGK-COOH                    | * |                |
| NH2-NYITESGKIVPSR-COOH               | * |                |
| NH2-YLSLLPYTDR-COOH                  | * | PD 2nd control |
| NH2-YLSLLPYTDRHQ-COOH                | * |                |
| #Gln->pyro-Glu (N-term Q)#-QHVPVFTDE | * |                |
| NH2-AVESGDKKPLR-COOH                 | * |                |
| NH2-GPFIDLHLLK-COOH                  | * |                |
| NH2-GPFIDLHLLKK-COOH                 | * |                |
| NH2-KGPFIDLHLLK-COOH                 | * |                |

NH2-KGPFIDLHLLKK-COOH \*  
NH2-LGEFAPTR-COOH \*  
NH2-QHVPVFVTDEM<Mox>VGHK-COOH \*  
NH2-QHVPVFVTDEMVGHK-COOH \*  
NH2-RSTIFPNM<Mox>IGLTIAVHNGR-COOH \*  
NH2-RSTIFPNMIGLTIAVHNGR-COOH \*  
NH2-RSTIFPNMIGLTIAVHNGRQHVPVFVTDI \*  
NH2-RSTIFPNMIGLTIAVHNGRQHVPVFVTDI \*  
NH2-STIFPNM<Mox>IGLTIAVHNGR-COOH \*  
NH2-STIFPNMIGLTIAVHNGR-COOH \*  
NH2-AASEAVKDAALSC<Cmm\*>DQFFVNHR \*  
NH2-AGVHFGHQTR-COOH \*  
NH2-AVTLYLGAVAATVR-COOH \*  
NH2-AVTLYLGAVAATVREGR-COOH \*  
NH2-DAALSC<Cmm\*>DQFFVNHR-COOH \*  
NH2-DLETQSQDGTDFDK-COOH \*  
NH2-DLETQSQDGTDFDKLTK-COOH \*  
NH2-DLETQSQDGTDFDKLTKK-COOH \*  
NH2-DM<Mox>GGLPDALFVIDADHEHIAIK-COOH \*  
NH2-DMGGLPDALFVIDADHEHIAIK-COOH \*  
NH2-EALMR-COOH \*  
NH2-EANNLGIPVFAIVDTNSDPDGVDVFIPIGM \*  
NH2-ELEKLENSLGGIK-COOH \*  
NH2-ELEKLENSLGGIKDM<Mox>GGLPDALFVIDADHEHIAIK-COOH \*  
NH2-ELEKLENSLGGIKDMGGLPDALFVIDADHEHIAIK-COOH \*  
NH2-ILFVGTK-COOH \*  
NH2-ILFVGTKR-COOH \*  
NH2-LENSLGGIK-COOH \*  
NH2-LENSLGGIKDM<Mox>GGLPDALFVIDADHEHIAIK-COOH \*  
NH2-LENSLGGIKDMGGLPDALFVIDADHEHIAIK-COOH \*  
NH2-LKDLETQSQDGTDFDK-COOH \*  
NH2-LKDLETQSQDGTDFDKLTK-COOH \*  
NH2-M<Mox>KPFIFGAR-COOH \*  
NH2-MKPFIFGAR-COOH \*  
NH2-NKVHIINLEK-COOH \*  
NH2-PFIFGAR-COOH \*  
NH2-RAASEAVK-COOH \*

PD 1st control PD 2nd control PD 3rd control

|                                       |   |                |
|---------------------------------------|---|----------------|
| NH2-RAASEAVKDAALSC<Cmm*>DQFFVNH       | * |                |
| NH2-RLKDLETQSQDGTFDK-COOH             | * |                |
| NH2-SQDLASQAEESFVEAE-COOH             | * |                |
| NH2-TRELEKLENSLGGIK-COOH              | * |                |
| NH2-TVPM<Mox>FNEALAELENK-COOH         | * | PD 2nd control |
| NH2-TVPMFNEALAELENK-COOH              | * |                |
| NH2-TVPMFNEALAELENKIASR-COOH          | * |                |
| NH2-VHIINLEK-COOH                     | * |                |
| NH2-WLGGM<Mox>LTNWK-COOH              | * |                |
| NH2-WLGGMLTNWK-COOH                   | * |                |
| NH2-YWNPK-COOH                        | * |                |
| NH2-AFNEM<Mox>QPIVDR-COOH             | * | PD 3rd control |
| NH2-AFNEMQPIVDR-COOH                  | * | PD 3rd control |
| NH2-ANLTAQINK-COOH                    | * |                |
| NH2-HKANLTAQINK-COOH                  | * |                |
| NH2-KVYAAIEAGDKAAAQK-COOH             | * |                |
| NH2-KVYAAIEAGDK-COOH                  | * |                |
| NH2-TFIKKVYAAIEAGDK-COOH              | * |                |
| NH2-VYAAIEAGDKAAAQK-COOH              | * |                |
| NH2-VYAAIEAGDK-COOH                   | * |                |
| NH2-AGVLAEVR-COOH                     | * |                |
| NH2-EFYEKPTTER-COOH                   | * |                |
| NH2-ENEPFDVALR-COOH                   | * |                |
| NH2-ENEPFDVALRR-COOH                  | * |                |
| NH2-REFYEKPTTER-COOH                  | * |                |
| NH2-VRENEPFDVALR-COOH                 | * |                |
| NH2-VRENEPFDVALRR-COOH                | * |                |
| #Gln->pyro-Glu (N-term Q)#-QYLTK-COOH | * |                |
| NH2-ADIDYNTSEAHTTYGVIGVK-COOH         | * | PD 3rd control |
| NH2-EFADNLDSDFK-COOH                  | * | PD 1st control |
| NH2-EFADNLDSDFKVR-COOH                | * | PD 3rd control |
| NH2-GEILGGM<Mox>AAVEQPEKPAAQPK-COOH   | * |                |
| NH2-GEILGGMMAAVEQPEKPAAQPK-COOH       | * |                |
| NH2-GIKVEVSGR-COOH                    | * |                |
| NH2-IVIERPAK-COOH                     | * |                |
| NH2-KGEDVEK-COOH                      | * |                |
| NH2-KPELDAK-COOH                      | * |                |

|                                  |   |                                 |                               |
|----------------------------------|---|---------------------------------|-------------------------------|
| NH2-KVVADIAGVPAQINIAEVR-COOH     | * | PD 1st control                  |                               |
| NH2-LGIVKPWNSTWFANTK-COOH        | * |                                 |                               |
| NH2-LGIVKPWNSTWFANTKEFADNLDSDFK- | * |                                 |                               |
| NH2-LVADSITSQLER-COOH            | * | PD 1st control                  | PD 3rd control                |
| NH2-PAAQPK-COOH                  | * |                                 |                               |
| NH2-PWNSTWFANTK-COOH             | * |                                 |                               |
| NH2-QYLTK-COOH                   | * |                                 |                               |
| NH2-VPLHTLR-COOH                 | * |                                 |                               |
| NH2-VTIHTARPGIVIGK-COOH          | * |                                 |                               |
| NH2-VVADIAGVPAQINIAEVR-COOH      | * |                                 | PD 2nd control PD 3rd control |
| NH2-VVADIAGVPAQINIAEVRK-COOH     | * |                                 |                               |
| NH2-VWIFK-COOH                   | * |                                 |                               |
| NH2-VWIFKGEILGGM<Mox>AAVEQPEKPA  | * |                                 |                               |
| NH2-VWIFKGEILGGMAAVEQPEKPAAQPK-C | * |                                 |                               |
| NH2-AALELAEQR-COOH               | * |                                 |                               |
| NH2-AIMVNGR-COOH                 | * |                                 |                               |
| NH2-C<Cmm*>KIEQAPGQHGAR-COOH     | * |                                 |                               |
| NH2-EGTDLFLK-COOH                | * |                                 |                               |
| NH2-EKPTWLEVDAGK-COOH            | * |                                 |                               |
| NH2-EKPTWLEVDAGKM<Mox>EGTFK-COO  | * |                                 |                               |
| NH2-EKPTWLEVDAGKMEGTFK-COOH      | * |                                 |                               |
| NH2-GNTGENLLALLEGR-COOH          | * |                                 |                               |
| NH2-GNTGENLLALLEGRLDNVVYR-COOH   | * |                                 |                               |
| NH2-IEQAPGQHGAR-COOH             | * |                                 |                               |
| NH2-IYGVLER-COOH                 | * |                                 |                               |
| NH2-LDNVVYR-COOH                 | * |                                 |                               |
| NH2-LKGNTGENLLALLEGR-COOH        | * |                                 |                               |
| NH2-LKGNTGENLLALLEGRLDNVVYR-COOH | * |                                 |                               |
| NH2-LSDYGVQLR-COOH               | * |                                 | PD 3rd control                |
| NH2-MEGTFK-COOH                  | * |                                 |                               |
| NH2-PTWLEVDAGK-COOH              | * |                                 |                               |
| NH2-REGTDLFLK-COOH               | * |                                 |                               |
| NH2-REGTDLFLKSGVR-COOH           | * |                                 |                               |
| NH2-RIYGVLER-COOH                | * |                                 |                               |
| NH2-SDLSADINEHLIVELYSK-COOH      | * |                                 |                               |
| NH2-VKAALELAEQR-COOH             | * |                                 |                               |
| NH2-VVNIASYQVSPNDVVSIR-COOH      | * | PD 1st control PD 2nd control v |                               |

NH2-VVNIASYQVSPNDVVSIREK-COOH \*  
 NH2-YLGPK-COOH \*  
 #Acetyl (Protein N-term)#-AHIEK-COOH \*  
 #Gln->pyro-Glu (N-term Q)#-QAGELQEK-COOH \*  
 NH2-AREVPAAIQK-COOH \*  
 NH2-ATIDGLENM<Mox>NSPEM<Mox>VAAK-COOH \*  
 NH2-ATIDGLENM<Mox>NSPEM<Mox>VAAK-COOH \*  
 NH2-ATIDGLENM<Mox>NSPEMVAAK-COOH \*  
 NH2-ATIDGLENM<Mox>NSPEMVAAKR-COOH \*  
 NH2-ATIDGLENMNSPEM<Mox>VAAK-COOH \*  
 NH2-ATIDGLENMNSPEM<Mox>VAAKR-COOH \*  
 NH2-ATIDGLENMNSPEMVAAK-COOH \*  
 NH2-ATIDGLENMNSPEMVAAKR-COOH \*  
 NH2-AVLEVAGVHNVLAKAYGSTNPINVVR-COOH \*  
 NH2-AVLEVAGVHNVLAK-COOH \*  
 NH2-AYGSTNPINVVR-COOH \*  
 NH2-EVPAAIQK-COOH \*  
 NH2-GKSVEEILGK-COOH \*  
 NH2-GVHTGSR-COOH \*  
 NH2-IFSFTALTVVGDGNGR-COOH \*  
 NH2-LIAVNR-COOH \*  
 NH2-NM<Mox>INVALNNGTLQHPVK-COOH \*  
 NH2-NMINVALNNGTLQHPVK-COOH \*  
 NH2-QAGELQEK-COOH \*  
 NH2-RNM<Mox>INVALNNGTLQHPVK-COOH \*  
 NH2-RNMINVALNNGTLQHPVK-COOH \*  
 NH2-SVEEILGK-COOH \*  
 NH2-TVKGGRIFSFTALTVVGDGNGR-COOH \*  
 NH2-VFM<Mox>QPASEGTGIIAGGAM<Mox>R-COOH \*  
 NH2-VFM<Mox>QPASEGTGIIAGGAMRAVL \*  
 NH2-VFM<Mox>QPASEGTGIIAGGAMR-COOH \*  
 NH2-VFMQPASEGTGIIAGGAM<Mox>R-COOH \*  
 NH2-VFMQPASEGTGIIAGGAMR-COOH \*  
 NH2-VGFGYGK-COOH \*  
 #Gln->pyro-Glu (N-term Q)#-QLAYPINK-COOH \*  
 NH2-AHYVLM<Mox>NVEAPQEVIDELETTFR \*  
 NH2-AHYVLMNVEAPQEVIDELETTFR-COOH \*

PD 1st control

PD 3rd control

NH2-DDFANETADDAEAGDSEEEEEEE-COOH \*  
NH2-FNDAVIR-COOH \*  
NH2-HAVTEASPM<Mox>VK-COOH \*  
NH2-HAVTEASPMVK-COOH \*  
NH2-HYEIVFM<Mox>VHPDQSEQVPGM<M \*  
NH2-HYEIVFM<Mox>VHPDQSEQVPGMIER \*  
NH2-HYEIVFMVHPDQSEQVPGM<Mox>IER \*  
NH2-HYEIVFMVHPDQSEQVPGMIER-COOH \*  
NH2-LEDWGR-COOH \*  
NH2-M<Mox>RHYEIVFM<Mox>VHPDQSEC \*  
NH2-M<Mox>RHYEIVFM<Mox>VHPDQSEC \*  
NH2-M<Mox>RHYEIVFMVHPDQSEQVPGM \*  
NH2-M<Mox>RHYEIVFMVHPDQSEQVPGM \*  
NH2-MRHYEIVFMVHPDQSEQVPGMIER-CO \*  
NH2-QLAYPINK-COOH \*  
NH2-RDDFANETADDAEAGDSEEEEEEE-COOH \*  
NH2-RQLAYPINK-COOH \*  
NH2-TKHAVTEASPM<Mox>VK-COOH \*  
NH2-TKHAVTEASPMVK-COOH \*  
NH2-YTAAITGAEGK-COOH \*  
#Gln->pyro-Glu (N-term Q)#-QPALGYLN-C \*  
NH2-FGSELLAK-COOH \*  
NH2-FGSELLAKFVNILMVDGK-COOH \*  
NH2-FVNILM<Mox>VDGK-COOH \*  
NH2-FVNILM<Mox>VDGKK-COOH \*  
NH2-FVNILMVDGK-COOH \*  
NH2-FVNILMVDGKK-COOH \*  
NH2-ILPDPK-COOH \*  
NH2-KILPDPK-COOH \*  
NH2-KILPDPKFGSELLAK-COOH \*  
NH2-KSTAESIVYSALETLAQR-COOH \*  
NH2-LANELSDAAENK-COOH \*  
NH2-LANELSDAAENKGTAVK-COOH \*  
NH2-LANELSDAAENKGTAVKK-COOH \*  
NH2-NALAM<Mox>RWIVEAAR-COOH \*  
NH2-NALAMR-COOH \*  
NH2-QPALGYLN-COOH \*



|                                        |   |                |
|----------------------------------------|---|----------------|
| NH2-RVGGSTYQVPVEVR-COOH                | * |                |
| NH2-RVGGSTYQVPVEVRPVR-COOH             | * |                |
| NH2-SELEAFEVALENVR-COOH                | * |                |
| NH2-SELEAFEVALENVRPTVEVK-COOH          | * |                |
| NH2-SELEAFEVALENVRPTVEVKSR-COOH        | * |                |
| NH2-SFSHQAGASSK-COOH                   | * |                |
| NH2-SGKSELEAFEVALENVRPTVEVK-COOH       | * |                |
| NH2-STAESIVYSALETLAQR-COOH             | * | PD 1st control |
| NH2-VGGSTYQVPVEVR-COOH                 | * |                |
| NH2-VGGSTYQVPVEVRPVR-COOH              | * | PD 1st control |
| NH2-VGGSTYQVPVEVRPVR-COOH              | * |                |
| NH2-WIVEAAR-COOH                       | * |                |
| #Acetyl (Protein N-term)#-SMQDPIADMLT  | * |                |
| #Gln->pyro-Glu (N-term Q)#-QAGLGGEIIC< | * |                |
| NH2-AAVTM<Mox>PSSK-COOH                | * |                |
| NH2-AAVTMPSSK-COOH                     | * |                |
| NH2-AVVESIQR-COOH                      | * |                |
| NH2-EEGFIEDFK-COOH                     | * |                |
| NH2-EEGFIEDFKVEGDTKPELELTLK-COOH       | * |                |
| NH2-KDELTPK-COOH                       | * |                |
| NH2-KDELTPKM<Mox>AGLGIAVVSTSK-CO       | * |                |
| NH2-LKVAIANVLK-COOH                    | * |                |
| NH2-LKVAIANVLKEEGFIEDFK-COOH           | * |                |
| NH2-M<Mox>SM<Mox>QDPIADMLTR-COO        | * |                |
| NH2-MSMQDPIADMLTR-COOH                 | * |                |
| NH2-PELELTLK-COOH                      | * |                |
| NH2-QAGLGGEIIC<Cmm*>YVA-COOH           | * |                |
| NH2-RKDELTPK-COOH                      | * |                |
| NH2-SM<Mox>QDPIADM<Mox>LTR-COOH        | * |                |
| NH2-SM<Mox>QDPIADMLTR-COOH             | * |                |
| NH2-SMQDPIADM<Mox>LTR-COOH             | * |                |
| NH2-SMQDPIADMLTR-COOH                  | * |                |
| NH2-VAIANVLK-COOH                      | * |                |
| NH2-VAIANVLKEEGFIEDFK-COOH             | * |                |
| NH2-VEGDTKPELELTLK-COOH                | * |                |
| NH2-VM<Mox>AGLGIAVVSTSK-COOH           | * | PD 3rd control |
| NH2-VMAGLGIAVVSTSK-COOH                | * | PD 3rd control |

|                                       |   |                |                |
|---------------------------------------|---|----------------|----------------|
| NH2-VMAGLGIADVSTSKGVM TDR-COOH        | * |                |                |
| NH2-YFQGKAVVESIQR-COOH                | * |                |                |
| NH2-YFQGK-COOH                        | * |                |                |
| #Gln->pyro-Glu (N-term Q)#-QPLELVDMVE | * |                |                |
| NH2-AENQYYGTGR-COOH                   | * |                |                |
| NH2-ALM<Mox>EYDESLR-COOH              | * |                |                |
| NH2-ALM<Mox>EYDESLRSELR-COOH          | * |                |                |
| NH2-ALM<Mox>EYDESLRSELRK-COOH         | * |                |                |
| NH2-ALMEYDESLR-COOH                   | * |                |                |
| NH2-ALMEYDESLRSELR-COOH               | * |                |                |
| NH2-ALMEYDESLRSELRK-COOH              | * |                |                |
| NH2-GGGISGQAGAIR-COOH                 | * |                |                |
| NH2-LDLYITVK-COOH                     | * |                | PD 3rd control |
| NH2-M<Mox>VVRQPLELVDM<Mox>VEK-C       | * |                |                |
| NH2-M<Mox>VVRQPLELVDMVEK-COOH         | * |                |                |
| NH2-MVVRQPLELVDMVEK-COOH              | * |                |                |
| NH2-QPLELVDM<Mox>VEK-COOH             | * |                |                |
| NH2-QPLELVDM<Mox>VEKLDLYITVK-COOH     | * |                |                |
| NH2-QPLELVDM<Mox>VEKLDLYITVKGGGIS     | * |                |                |
| NH2-QPLELVDMVEK-COOH                  | * |                |                |
| NH2-QPLELVDMVEKLDLYITVK-COOH          | * |                |                |
| NH2-SLEQYFGR-COOH                     | * | PD 1st control | PD 3rd control |
| NH2-VFIKPGNGK-COOH                    | * |                |                |
| NH2-VFIKPGNGKIVINQR-COOH              | * |                |                |
| NH2-AENISVAQYC<Cmm*>QM<Mox>ANYI       | * |                |                |
| NH2-AENISVAQYC<Cmm*>QMANYLAENAF       | * |                |                |
| NH2-FGQNFLNDQFVIDSIVSAINPQK-COOH      | * |                |                |
| NH2-GQAM<Mox>VEIGPGLAALTEPVGER-C      | * |                |                |
| NH2-GQAMVEIGPGLAALTEPVGER-COOH        | * |                |                |
| NH2-ITTEAFNQR-COOH                    | * |                |                |
| NH2-LDQLTVIELDR-COOH                  | * |                |                |
| NH2-LDQLTVIELDRLAAR-COOH              | * |                |                |
| NH2-LQTHPFLGPK-COOH                   | * |                |                |
| NH2-LTIYQQDAM<Mox>TFNFGELA EK-COO     | * |                |                |
| NH2-LTIYQQDAMTFNFGELA EK-COOH         | * |                |                |
| NH2-LVPHATMPHPVKDVR-COOH              | * |                |                |
| NH2-NSLGNLFSVEVLTGM<Mox>GIDPAM<I      | * |                |                |

NH2-NSLGNLFSVEVLTGM<Mox>GIDPAMR-\*  
NH2-NSLGNLFSVEVLTGMGIDPAM<Mox>R-\*  
#Gln->pyro-Glu (N-term Q)#-QQEELLAEFN-\*  
NH2-ALLQELC<Cmm\*>FGVLR-COOH \*  
NH2-AYPEQWQSIVEANNQRPPMWLR-COO \*  
NH2-DSWLALLDEAGM<Mox>K-COOH \*  
NH2-DSWLALLDEAGMK-COOH \*  
NH2-GFPHADYPDAVR-COOH \*  
NH2-GLINGVLR-COOH \*  
NH2-ILLDAPC<Cmm\*>SATGVIR-COOH \*  
NH2-IPPHAALAETVEGAIAIK-COOH \*  
NH2-QGDGRYPSQWC<Cmm\*>GEQQFDR-C \*  
NH2-QNLPGAEEGDGFFYAK-COOH \*  
NH2-QQEELLAEFNASDAR-COOH \*  
NH2-SM<Mox>AAQAVEQVVEQGSLSNILP \*  
NH2-SMAAQAVEQVVEQGSLSNILPPLQQK \*  
NH2-TADAELC<Cmm\*>ETGTPEQPGK-COO \*  
NH2-TADAELC<Cmm\*>ETGTPEQPGKQNL \*  
NH2-TGGTLVYATC<Cmm\*>SVLPEENSLQIK \*  
NH2-TLSQLDWLINK-COOH \*  
NH2-TTHILEVAPEAQVVAVDIDEQR-COOH \*  
NH2-YLHPSWLLK-COOH \*  
NH2-YPSQWC<Cmm\*>GEQQFDR-COOH \*  
#Gln->pyro-Glu (N-term Q)#-QPVFDAEK-C \*  
#Gln->pyro-Glu (N-term Q)#-QPVFDAEKFW \*  
NH2-AHTQQFHWWQVLSR-COOH \*  
NH2-ATLAANGVEGEVFASNVFSEVK-COOH \*  
NH2-C<Cmm\*>GLYFGR-COOH \*  
NH2-DGLDVGSQLLLSTLTPHTK-COOH \*  
NH2-FDM<Mox>IISNPPFHDGM<Mox>QTS \*  
NH2-FDM<Mox>IISNPPFHDGMQTSLDAAQ \*  
NH2-FDMIISNPPFHDGM<Mox>QTSLDAAQ \*  
NH2-FDMIISNPPFHDGMQTSLDAAQTLIR-CC \*  
NH2-FSLVATADDVADC<Cmm\*>DTLIYYWPI \*  
NH2-FWGEYSVDGLTVK-COOH \*  
NH2-GKVLVDVGC<Cmm\*>GAGVLSVAFAR-C \*  
NH2-GRFDM<Mox>IISNPPFHDGM<Mox>C \*

NH2-GRFDM<Mox>IISNPPFHDGMQTSLDA\*  
NH2-GRFDMIISNPPFHDGM<Mox>QTSLDA\*  
NH2-GRFDMIISNPPFHDGMQTSLDAAQTLIR\*  
NH2-HLNSGGELR-COOH\*  
NH2-HSDDFEQSR-COOH\*  
NH2-IDPEWVEPVAQHLIK-COOH\*  
NH2-ILFAGDLQDDLPAR-COOH\*  
NH2-IVANAFLPYPDVLDLDTFGFHEVIAQTGR-\*  
NH2-LTLC<Cmm\*>DVSAPAVEASR-COOH\*  
NH2-QPVFDAEK-COOH\*  
NH2-QPVFDAEKFWGEYSVDGLTVK-COOH\*  
NH2-SAEQM<Mox>LADYAPLNK-COOH\*  
NH2-SAEQM<Mox>LADYAPLNKVDSAR-COOH\*  
NH2-SAEQMLADYAPLNK-COOH\*  
NH2-SAEQMLADYAPLNKVDSAR-COOH\*  
NH2-SAFTPASEVLLR-COOH\*  
NH2-TLPGVFSR-COOH\*  
NH2-VLDVGC<Cmm\*>GAGVLSVAFAR-COOH\*  
NH2-GTPHNIVFVDPPFR-COOH\*  
NH2-KLPVPDSPGLRPTTDR-COOH\*  
NH2-VVNSNAMSFLAQK-COOH\*  
NH2-YAAGATLIEM<Mox>DR-COOH\*  
NH2-YAAGATLIEMDR-COOH\*  
NH2-ASNSINTLPLPVER-COOH\*  
NH2-IAIAAC<Cmm\*>EQC<Cmm\*>GR-COOH\*  
NH2-IYHPEPLTSHSHIALC<Cmm\*>EDAANHI\*  
NH2-LLIGPEGGLSADEIAM<Mox>TAR-COOH\*  
NH2-LLIGPEGGLSADEIAMTAR-COOH\*  
NH2-M<Mox>GPGQALQLFDGSNQVFDAEIT\*  
NH2-MGPGQALQLFDGSNQVFDAEITSASK-C\*  
NH2-NRVPEIRPAMDLEAWC<Cmm\*>AEQD\*  
NH2-SIELGVSLITPLFSER-COOH\*  
NH2-TETTALTAITALQVR-COOH\*  
NH2-YQFTDILLGPR-COOH\*  
NH2-C<Cmm\*>GISNVALTHFDGR-COOH\*  
NH2-ETYPDAVEFLPLGLDFPGANK-COOH\*  
NH2-ELAEVVAAATPVK-COOH\*

NH2-ELAENVAAATPVKDK-COOH \*

NH2-FSIIHGPFSAIGEYVAER-COOH \*

NH2-GPQVPAGLPM<Mox>TEEQLK-COOH \*

NH2-GPQVPAGLPM<Mox>TEEQLKK-COOH \*

NH2-GPQVPAGLPMTEEQLK-COOH \*

NH2-GPQVPAGLPMTEEQLKK-COOH \*

NH2-IDGILLDLGVSSPQLDDAER-COOH \*

NH2-IWVNSELEEIEQALK-COOH \*

NH2-LILSQLGEEGR-COOH \*

NH2-LLAIDRDPQAI(A)AVAK-COOH \*

NH2-LM<Mox>PGEEEVAENPR-COOH \*

NH2-LMPGEEEVAENPR-COOH \*

NH2-LSIISFHSLEDR-COOH \*

NH2-SSLNVLAPGGR-COOH \*

NH2-TKELAEVVAAATPVK-COOH \*

NH2-TKELAEVVAAATPVKDK-COOH \*

NH2-ALEVLQAVDLIAAEDTR-COOH \*

NH2-HTGLLLQHFGINAR-COOH \*

NH2-LLDSLEDIVAVLGESR-COOH \*

NH2-LQEGQNIALVSDAGTPLINDPGYHLVR-COOH \*

NH2-TLALLQAELPLKK-COOH \*

NH2-TLIFYESTHR-COOH \*

NH2-VVPLPGPC<Cmm\*>AAITALSAAGLPSD \*

NH2-DLTKPAVLEVITPTQVR-COOH \*

NH2-FIAQQLGVS(R)-COOH \*

NH2-GVQLHNEKDLTKPAVLEVITPTQVR-COOH \*

NH2-LDIDTTGLVLM<Mox>TDDGQWSHR-COOH \*

NH2-LLPEHDVAYDGNPLAQQHGPR-COOH \*

NH2-TYLVTLLESPVADDTAEQFAK-COOH \*

NH2-VTV(D)GEIVR-COOH \*

NH2-ALEWLDVQPEDR-COOH \*

NH2-IVYVSC<Cmm\*>NPATLAR-COOH \*

NH2-LSLN(L)PK-COOH \*

NH2-QC<Cmm\*>PILAPQLEALLPK-COOH \*

NH2-QIITVSVNDLDSFGQGVAR-COOH \*

#Gln->pyro-Glu (N-term Q)#-QEKE(D)SETFQ \*

NH2-DLPDLVYMTEAEK-COOH \*

NH2-DVDYIVKDGGEVIIVDEHTGR-COOH \*

NH2-ESFSM<Mox>FAAM<Mox>LESLK-COOH \*

NH2-FYLSM<Mox>EDALM<Mox>R-COOH \*

NH2-GEVLENLIPEAFVVR-COOH \*

NH2-GLVLIEELLVK-COOH \*

NH2-GQPVLVGTISIEK-COOH \*

NH2-GVHVTVNDYLAQR-COOH \*

NH2-GVM<Mox>LQTLDSLWK-COOH \*

NH2-GVMLQTLDSLWK-COOH \*

NH2-HDAVLEAGGLHIIGTER-COOH \*

NH2-ILAQSIEVYQR-COOH \*

NH2-IQAIIEDIKER-COOH \*

NH2-KTEALVAQIQQIDVTVTHTETEALLEHN \*

NH2-LAQM<Mox>QLSHQDDDSAAAAALA \*

NH2-LAQMQLSHQDDDSAAAAALAAQTGE \*

NH2-LEKGEVLENLIPEAFVVR-COOH \*

NH2-LGM<Mox>KPGEAIEHPWVTK-COOH \*

NH2-LHYALVDEVDSILIDEAR-COOH \*

NH2-MPEEVEEQQR-COOH \*

NH2-NELLDVSDVSETINSIR-COOH \*

NH2-QLLEYDDVANDQR-COOH \*

NH2-TLTATLPAYLNALTGK-COOH \*

NH2-TPLIISGPAEDSSEM<Mox>YKR-COOH \*

NH2-TPLIISGPAEDSSEMYKR-COOH \*

NH2-DISFEAPNAPHVFQK-COOH \*

NH2-LDLDTASSQLADDVYEVVLR-COOH \*

NH2-FVDPNLLVGNETR-COOH \*

NH2-LFLTGPLGIGVLTAEK-COOH \*

NH2-LSPEIAR-COOH \*

NH2-FTGNVIGDIVDAQYK-COOH \*

NH2-GADANILQQVR-COOH \*

NH2-LAGTGEMVAEVTER-COOH \*

NH2-AELLYGVIDNSDFYR-COOH \*

NH2-ALTDPMVEFER-COOH \*

NH2-AQIFNFSSGPAM<Mox>LPAEVLK-COOH \*

NH2-ASIYNAMPLEGVK-COOH \*

NH2-DLLNVPSNYK-COOH \*

PD 2nd control PD 3rd control

|                                   |   |                                              |
|-----------------------------------|---|----------------------------------------------|
| NH2-GQFAAVPLNILGDK-COOH           | * | PD 2nd control                               |
| NH2-NIGPAGLTIVIVR-COOH            | * |                                              |
| NH2-IQAFDDFFGYR-COOH              | * |                                              |
| NH2-M<Mox>NTLGWDFDK-COOH          | * |                                              |
| NH2-SQDTTLNELAALLSC<Cmm*>SR-COOH  | * |                                              |
| NH2-IAIVNM<Mox>GSLFQQVAQK-COOH    | * |                                              |
| NH2-IAIVNMGSLFQQVAQK-COOH         | * |                                              |
| NH2-TGVSNTLENEFK-COOH             | * | PD 3rd control                               |
| NH2-QSGFLDPVNYR-COOH              | * | PD 3rd control                               |
| NH2-SFVAVHNQPGLYVGQQAR-COOH       | * |                                              |
| NH2-DLVVSLAYQVR-COOH              | * |                                              |
| NH2-DVFM<Mox>GVDELQVGM<Mox>R-COOH | * |                                              |
| NH2-DVFM<Mox>GVDELQVGMR-COOH      | * |                                              |
| NH2-DVFMGVDELQVGM<Mox>R-COOH      | * |                                              |
| NH2-DVFMGVDELQVGMR-COOH           | * |                                              |
| NH2-FLAETDQGPVPVEITAVEDDHVVVDGNH  | * |                                              |
| NH2-FNVEVVAIR-COOH                | * |                                              |
| NH2-DALAPHISAETIEYHYGK-COOH       | * | PD 2nd control                               |
| NH2-HHQTYVTNLNLIK-COOH            | * |                                              |
| NH2-NFGSGWTWLVK-COOH              | * | PD 2nd control PD 3rd control                |
| NH2-SFELPALPYAK-COOH              | * | PD 1st control PD 2nd control PD 3rd control |
| NH2-VAEAIAASFGSFADFK-COOH         | * | PD 2nd control PD 3rd control                |
| NH2-GADGVLITFAK-COOH              | * |                                              |
| NH2-IVELPAGATPVDFAYAVHTDIGHAC<Cm  | * |                                              |
| NH2-HILGLDHK-COOH                 | * |                                              |
| NH2-IVTEGDKSSVVNNPTGR-COOH        | * |                                              |
| NH2-KIVTEGDKSSVVNNPTGR-COOH       | * |                                              |
| NH2-SSVVNNPTGR-COOH               | * |                                              |
| NH2-AVETLILDEADR-COOH             | * |                                              |
| NH2-EAGINNC<Cmm*>YLEGEM<Mox>VQC   | * |                                              |
| NH2-GFTRPTAIQAAAIPPALDGR-COOH     | * |                                              |
| NH2-GIDIPDVSHVFNFDL<Mox>PR-COOH   | * |                                              |
| NH2-ILILTPTR-COOH                 | * |                                              |
| NH2-LLEDPEVSANPSTR-COOH           | * |                                              |
| NH2-M<Mox>LDM<Mox>GFAQDIEHIAGET   | * |                                              |
| NH2-MLDMGFAQDIEHIAGETR-COOH       | * |                                              |
| NH2-TALLVHLLK-COOH                | * |                                              |

|                                     |   |                |
|-------------------------------------|---|----------------|
| NH2-TVTTTFSELELDESLEALQDK-COOH      | * |                |
| NH2-VNVLVATDVAAR-COOH               | * |                |
| NH2-DSFLASLTEAER-COOH               | * | PD 2nd control |
| NH2-LPQLGIEFSGPGAK-COOH             | * | PD 2nd control |
| NH2-ADGINPEELGNSSAAAPR-COOH         | * |                |
| NH2-ISTWLELMK-COOH                  | * |                |
| NH2-AFAENWLK-COOH                   | * |                |
| NH2-AVLVNIFGGIVR-COOH               | * |                |
| NH2-DLALIEINPLVITK-COOH             | * |                |
| NH2-ELYLGAVVDR-COOH                 | * |                |
| NH2-GLTDAAQQVVAAVEGK-COOH           | * |                |
| NH2-LADSGLNIIAAK-COOH               | * |                |
| NH2-LGADGNALFR-COOH                 | * |                |
| NH2-DSILEAIDAGIK-COOH               | * |                |
| NH2-SLADIGEALK-COOH                 | * |                |
| NH2-LLVSELSGVEPK-COOH               | * |                |
| NH2-LSGDTLDGETAFR-COOH              | * |                |
| NH2-FGFLLDALK-COOH                  | * | PD 2nd control |
| NH2-FLNAEIIEDILDR-COOH              | * | PD 2nd control |
| NH2-NPM<Mox>ELTDVADLLK-COOH         | * | PD 2nd control |
| NH2-NPMELTDVADLLK-COOH              | * | PD 2nd control |
| NH2-GPIEFNSQELDDLIIR-COOH           | * |                |
| NH2-TALYSWLFAR-COOH                 | * |                |
| NH2-ANDIVVALLQEK-COOH               | * |                |
| NH2-ASFVTLQDVGGR-COOH               | * |                |
| NH2-IAPELYLK-COOH                   | * |                |
| NH2-TKTGELSIHC<Cmm*>TELR-COOH       | * |                |
| NH2-ALRPLPKFHGLQDQEVN-COOH          | * |                |
| NH2-GANEAIDFNDELN-COOH              | * |                |
| NH2-IVTEIFDEVAEAHLIQPTFITEYPAEVSPLA | * |                |
| NH2-TQTGELSIHC<Cmm*>TELR-COOH       | * |                |
| NH2-VTYGEHVDFGKPFK-COOH             | * | PD 2nd control |
| NH2-WDLGDIIGAR-COOH                 | * | PD 2nd control |
| NH2-YLDLIANDK-COOH                  | * |                |
| NH2-VVASPGQGQQFEIQASK-COOH          | * |                |
| NH2-AELDALQAEIR-COOH                | * |                |
| NH2-EISSC<Cmm*>SNVWDFQAR-COOH       | * |                |



|                                   |   |                |
|-----------------------------------|---|----------------|
| NH2-LGEELDAAKAELDALQAEIR-COOH     | * |                |
| NH2-VLQLLGLPYR-COOH               | * |                |
| NH2-VLQLLGLPYRK-COOH              | * |                |
| NH2-AC<Cmm*>AEAGVFLISPFVGR-COOH   | * | PD 2nd control |
| NH2-LAVNFGAEILK-COOH              | * | PD 2nd control |
| NH2-LTIAPNLLK-COOH                | * |                |
| NH2-QFTTVVADSGDIESIR-COOH         | * | PD 2nd control |
| NH2-ELAESEGAIER-COOH              | * |                |
| NH2-ILDWYK-COOH                   | * |                |
| NH2-ITSEFLWQHNQDPM<Mox>AVDK-CO    | * | PD 2nd control |
| NH2-KLIDDAVAWAK-COOH              | * |                |
| NH2-LASTWQGIR-COOH                | * |                |
| NH2-LIDDAVAWAK-COOH               | * | PD 1st control |
| NH2-LTIAPALLK-COOH                | * |                |
| NH2-LYNDAGISNDR-COOH              | * |                |
| NH2-LYQPQDATTNPSLILNAAQIPEYR-COOH | * |                |
| NH2-M<Mox>IGDLL-COOH              | * |                |
| NH2-NIGEILELAGC<Cmm*>DR-COOH      | * | PD 2nd control |
| NH2-QYTTVVADTGDIAM<Mox>K-COOH     | * |                |
| NH2-QYTTVVADTGDIAMK-COOH          | * |                |
| NH2-LEIEAIAVR-COOH                | * | PD 3rd control |
| NH2-KPIIYDVETLR-COOH              | * |                |
| NH2-AIEEGKLESFVTDFYQR-COOH        | * |                |
| NH2-GPILTDSGGFQVFSLGDIR-COOH      | * |                |
| NH2-ILEHVC<Cmm*>PQIPADKPR-COOH    | * |                |
| NH2-NGHLFVTDGVVK-COOH             | * |                |
| NH2-NPINGDPIFLDPEK-COOH           | * |                |
| NH2-YLM<Mox>GVGKPEDLVEGVR-COOH    | * |                |
| NH2-FVAINFEPVVGIELEK-COOH         | * |                |
| NH2-GIPTLLLFK-COOH                | * | PD 2nd control |
| NH2-M<Mox>IAPILDEIADEYQGK-COOH    | * |                |
| NH2-MIAPILDEIADEYQGK-COOH         | * |                |
| NH2-TTDELDAIFFGR-COOH             | * |                |
| NH2-VTDVLLASHENTAQIIDAR-COOH      | * |                |
| NH2-ANDIDVPAALIDSEIDVLR-COOH      | * |                |
| NH2-ANDIDVPAALIDSEIDVLR-COOH      | * |                |
| NH2-ASDFVLAM<Mox>GQGR-COOH        | * |                |

|                                    |   |                                              |
|------------------------------------|---|----------------------------------------------|
| NH2-ASDFVLAMGQGR-COOH              | * |                                              |
| NH2-ELPELTAEFIK-COOH               | * |                                              |
| NH2-FGVEDGSVEGLR-COOH              | * |                                              |
| NH2-GLIEEM<Mox>ASAYEDPKEVIEFYSK-CC | * |                                              |
| NH2-GLIEEMASAYEDPKEVIEFYSK-COOH    | * |                                              |
| NH2-INPAGAPTYVPGEYK-COOH           | * | PD 3rd control                               |
| NH2-M<Mox>IPGFEDGIK-COOH           | * |                                              |
| NH2-MIPGFEDGIK-COOH                | * |                                              |
| NH2-MQVSVETTQGLGR-COOH             | * |                                              |
| NH2-NFIDAIK-COOH                   | * |                                              |
| NH2-NVALEEQAWEAVLAK-COOH           | * |                                              |
| NH2-QDVLGDLMSR-COOH                | * |                                              |
| NH2-RVTITIAADSIETAVK-COOH          | * |                                              |
| NH2-VTEKETTFFNELM<Mox>NQQA-COOH    | * |                                              |
| NH2-VTITIAADSIETAVK-COOH           | * |                                              |
| NH2-VVVGLLLGEVIR-COOH              | * |                                              |
| NH2-ATYTQTHM<Mox>DFIIEAFK-COOH     | * | PD 2nd control                               |
| NH2-ATYTQTHMDFIIEAFK-COOH          | * | PD 2nd control                               |
| NH2-AVEIGSFLGR-COOH                | * | PD 2nd control PD 3rd control                |
| NH2-DDSFFDVYTEC<Cmm*>R-COOH        | * | PD 2nd control                               |
| NH2-EAEYKDWITIEQITR-COOH           | * | PD 1st control                               |
| NH2-FAENAYFIK-COOH                 | * | PD 1st control PD 2nd control PD 3rd control |
| NH2-GAEQIYIPVLIK-COOH              | * | PD 2nd control PD 3rd control                |
| NH2-GIEEVGPNNVPYIVATITSNSAGGQPVSL  | * |                                              |
| NH2-GLTFTYEYK-COOH                 | * | PD 2nd control PD 3rd control                |
| NH2-GNFDLEGLER-COOH                | * | PD 1st control PD 2nd control PD 3rd control |
| NH2-IAQVQYLVDGLEEIGVVC<Cmm*>QQA    | * |                                              |
| NH2-KYDIPVVM<Mox>DSAR-COOH         | * |                                              |
| NH2-KYDIPVVMDSAR-COOH              | * |                                              |
| NH2-LAVGLYDGM<Mox>NLDWLAYR-COOH    | * |                                              |
| NH2-LAVGLYDGMNLDWLAYR-COOH         | * |                                              |
| NH2-LLPHIPADQFPAQALAC<Cmm*>ELYK-C  | * | PD 1st control PD 2nd control PD 3rd control |
| NH2-M<Mox>VAFSNYFFDTTQGHSQINGC<    | * |                                              |
| NH2-MVAFSNYFFDTTQGHSQINGC<Cmm*>    | * | PD 1st control                               |
| NH2-NIFGYQYTIPTHQGR-COOH           | * | PD 1st control                               |
| NH2-SYYALAESVK-COOH                | * | PD 2nd control                               |
| NH2-TLC<Cmm*>VVQEGFPTYGGLEGGAM<    | * | PD 2nd control                               |

|                                    |   |                               |
|------------------------------------|---|-------------------------------|
| NH2-TLC<Cmm*>VVQEGFPTYGGLEGGAME*   |   | PD 2nd control                |
| NH2-YADMLAMSAK-COOH                | * |                               |
| NH2-LFNAAK-COOH                    | * | PD 2nd control PD 3rd control |
| NH2-DELIR-COOH                     | * | PD 3rd control                |
| NH2-SALVIQTLANGAVR-COOH            | * |                               |
| NH2-TM<Mox>M<Mox>M<Mox>AQRLYE*     | * | PD 1st control                |
| NH2-DLSDVTLGQFAGK-COOH             | * |                               |
| NH2-NAEFLQAYGVAIADGPLK-COOH        | * | PD 1st control                |
| NH2-HTAMK-COOH                     | * |                               |
| NH2-TSGKVM<Mox>VC<Cmm*>GGDVFC<     | * |                               |
| NH2-DADELLAILASK-COOH              | * | PD 2nd control                |
| NH2-DGEPETPPNNWR-COOH              | * |                               |
| NH2-FLHPEIVTVDPGYAEAGR-COOH        | * |                               |
| NH2-QAAC<Cmm*>QLIAQVTGR-COOH       | * |                               |
| NH2-VITPETTALLC<Cmm*>ATDTLALGASK-  | * |                               |
| NH2-IVQVPFAELVK-COOH               | * |                               |
| NH2-NLSESN DYVPRPASRPVTK-COOH      | * |                               |
| NH2-DNGAGVPDVGELLNYDADNVQHR-COO    | * |                               |
| NH2-ISAIASAASVLLK-COOH             | * |                               |
| NH2-LGYVTPLAAGAFPLTR-COOH          | * |                               |
| NH2-AELD GKPVIVC<Cmm*>STGIGGPSTSI* | * |                               |
| NH2-AGMVAGVIVNR-COOH               | * |                               |
| NH2-GSM<Mox>EEWQAMGVM<Mox>NYE*     | * | PD 1st control                |
| NH2-IGTTGAIQPHINVGDLVTTASVR-COOH   | * | PD 1st control PD 3rd control |
| NH2-LDGASLHFAPLEFPAVADFEC<Cmm*>T*  | * |                               |
| NH2-NDLQGATLAIVPGDPDRVEK-COOH      | * | PD 3rd control                |
| NH2-SDVFHLGLTK-COOH                | * | PD 3rd control                |
| NH2-SIGATTHVGVTASSDTFYPGQER-COOH   | * | PD 1st control PD 3rd control |
| NH2-TQQEIPNAETMK-COOH              | * |                               |
| NH2-NEETLEPVYPYFQK-COOH            | * |                               |
| NH2-VLVLVAAPEGIAALEK-COOH          | * |                               |
| NH2-ISVTS LISASAQ GK-COOH          | * | PD 1st control                |
| NH2-QLINTVHVDM<Mox>LIVPLRDEEE-COO  | * |                               |
| NH2-TILVPIDISDSELTQR-COOH          | * |                               |
| NH2-DEVNELAEELGADV VVIGSR-COOH     | * |                               |
| NH2-FGSVRDEVNELAEELGADV VVIGSR-COO | * |                               |
| NH2-HAEFLAQDDGVIHLLHVLP GSASLSLHR- | * |                               |

|                                     |   |                |
|-------------------------------------|---|----------------|
| NH2-HANLPVLVVR-COOH                 | * |                |
| NH2-LQTMVSHFTIDPSR-COOH             | * |                |
| NH2-NPSISTHLLGSNASSVIR-COOH         | * |                |
| NH2-TIIM<Mox>PVDVFEM<Mox>ELSDK-COOH | * |                |
| NH2-TIIMPVDVFEMELSDK-COOH           | * |                |
| NH2-SNPATYTG VFTPVR-COOH            | * |                |
| NH2-TLENLASQGYIR-COOH               | * |                |
| NH2-M<Mox>EC<Cmm*>FDISHTMGEQTV-COOH | * | PD 1st control |
| NH2-MEC<Cmm*>FDISHTM<Mox>GEQTV-COOH | * | PD 1st control |
| NH2-NVFAELDVSWDKNHPLLLGVAK-COOH     | * |                |
| NH2-TLLADSLSELAGR-COOH              | * |                |
| NH2-TFLDQTGGLWASGALYGK-COOH         | * | PD 2nd control |
| NH2-TQTAPVATPQELADYDAIIFGTPTR-COOH  | * |                |
| NH2-VPETMPPQLFEK-COOH               | * | PD 2nd control |
| NH2-YQGEYVAGLAVK-COOH               | * |                |
| NH2-AFIDFLSEHVK-COOH                | * |                |
| NH2-ARPLFNSYR-COOH                  | * |                |
| NH2-GELVELMADK-COOH                 | * |                |
| NH2-IIASPDYISR-COOH                 | * |                |
| NH2-LGVSLLR-COOH                    | * |                |
| NH2-QLSLTEEGER-COOH                 | * |                |
| NH2-VLPVEMPFSAVYYSR-COOH            | * |                |
| NH2-YGLSSNSGETLK-COOH               | * |                |
| NH2-ALQILDFNEQATELK-COOH            | * |                |
| NH2-EALM<Mox>SALAQTR-COOH           | * |                |
| NH2-EQLQQAGLALS-COOH                | * |                |
| NH2-TLQLHGYIDQNPENK-COOH            | * |                |
| NH2-VDDAELANFREQLQQAGLALS-COOH      | * |                |
| NH2-VIAALSSTLTSR-COOH               | * |                |
| NH2-LVLELTER-COOH                   | * |                |
| NH2-YLQAFPVDFIK-COOH                | * |                |
| NH2-LAHAM<Mox>GAHVVAFTTSEAK-COOH    | * |                |
| NH2-SEWAGTVYPC<Cmm*>VPGHEIVGR-COOH  | * | PD 2nd control |
| NH2-SPEVFNLMK-COOH                  | * | PD 2nd control |
| NH2-VGVVIGGLGHM<Mox>GIK-COOH        | * |                |
| NH2-GIEGSSLDVPENIVHSGK-COOH         | * |                |
| NH2-PSFDIVSEVDLQEAR-COOH            | * | PD 2nd control |

|                                   |   |                |
|-----------------------------------|---|----------------|
| NH2-VLSEDFQVNQLLDILR-COOH         | * |                |
| NH2-LQGQILKR-COOH                 | * |                |
| NH2-VLTETIFELM<Mox>GITPTLHGGQAQA  | * |                |
| NH2-IATTNSGELLSLTPVEHVC<Cmm*>R-CO | * |                |
| NH2-VIEFAQSGLKPLVK-COOH           | * |                |
| NH2-PGNINAWDNEDFVK-COOH           | * | PD 2nd control |
| NH2-AFQQQLAEVAIAGFQPQFNK-COOH     | * |                |
| NH2-TDIYNYDLPAR-COOH              | * |                |
| NH2-C<Cmm*>GKPFTHQVYTTYC<Cmm*>F   | * |                |
| NH2-LDYQGIYTPDQVER-COOH           | * |                |
| NH2-LPLTLDPVR-COOH                | * |                |
| NH2-RLDYQGIYTPDQVER-COOH          | * |                |
| NH2-VAESVVSVDSDVEC<Cmm*>SM<Mox>   | * |                |
| NH2-VAESVVSVDSDVEC<Cmm*>SMSFAID   | * |                |
| NH2-VKLPLTLDPVR-COOH              | * |                |
| NH2-VTVTLEC<Cmm*>QR-COOH          | * |                |
| NH2-AHPADVLPQEMDKLR-COOH          | * | PD 3rd control |
| NH2-ELGGNYSDPDVPPR-COOH           | * | PD 3rd control |
| NH2-ELISGFADYVLQR-COOH            | * | PD 3rd control |
| NH2-EM<Mox>M<Mox>LELINQPEHFK-COO  | * | PD 3rd control |
| NH2-HELDIAPPEPPYQPDEIYDALK-COOH   | * | PD 3rd control |
| NH2-PVVLK-COOH                    | * | PD 1st control |
| NH2-QWFGFISQSR-COOH               | * | PD 3rd control |
| NH2-APTLYAEFTNK-COOH              | * |                |
| NH2-LC<Cmm*>HIIWRE-COOH           | * |                |
| NH2-HAGSAFSLFIDR-COOH             | * |                |
| NH2-IGPDIPM<Mox>AIVGSPDYFSR-COOH  | * |                |
| NH2-IGPDIPMAIVGSPDYFSR-COOH       | * |                |
| NH2-LSM<Mox>AQSALSQIVR-COOH       | * |                |
| NH2-LSMAQSALSQIVR-COOH            | * |                |
| NH2-DPSVVPFASAFDPDR-COOH          | * |                |
| NH2-MFSTGENWSR-COOH               | * |                |
| NH2-PQSGYYVAPQAIK-COOH            | * |                |
| NH2-ILSIDTEGLTAEQIR-COOH          | * |                |
| NH2-LAPLDLIR-COOH                 | * |                |
| NH2-IVQSPDVIPADSEAGR-COOH         | * |                |
| NH2-KVEIPGVATTASPSSEVGR-COOH      | * |                |

|                                      |   |                |
|--------------------------------------|---|----------------|
| NH2-LAEPAPTGEQLQNILR-COOH            | * | PD 2nd control |
| NH2-DLEKLEDEGFLTR-COOH               | * | PD 1st control |
| NH2-VTVSNLSGIFQVTEETIRR-COOH         | * | PD 1st control |
| NH2-PAGISNPKDFR-COOH                 | * | PD 1st control |
| NH2-LVADPLLFER-COOH                  | * | PD 2nd control |
| NH2-GDYEDRVDDYIIK-COOH               | * |                |
| NH2-M<Mox>ETTKPSFQDVLEFVR-COOH       | * |                |
| NH2-VLLLDNLSDYIK-COOH                | * |                |
| NH2-VLLLDNLSDYIKPGM<Mox>SVEAIQGIIA   | * |                |
| NH2-VLLLDNLSDYIKPGMSVEAIQGIIASM<M    | * |                |
| NH2-VLLLDNLSDYIKPGMSVEAIQGIIASMK-C   | * |                |
| NH2-C<Cmm*>PDIVLSSFLNGLIYEK-COOH     | * |                |
| NH2-TDDILAILTEQQFR-COOH              | * |                |
| NH2-QYHLSANEINQIINA-COOH             | * | PD 2nd control |
| NH2-VTFLGFDAATEAR-COOH               | * | PD 2nd control |
| NH2-AEAEQTLAALTEK-COOH               | * |                |
| NH2-ITPTFTEESDGVR-COOH               | * |                |
| #Gln->pyro-Glu (N-term Q)#-QVPAEAEEM | * |                |
| NH2-C<Cmm*>EEIANELTR-COOH            | * |                |
| NH2-DAIIDDLK-COOH                    | * |                |
| NH2-EAVAERDAIIDDLKAR-COOH            | * |                |
| NH2-EAVAERDAIIDDLK-COOH              | * |                |
| NH2-GGVSHWLEGR-COOH                  | * |                |
| NH2-GLISVEQEIK-COOH                  | * |                |
| NH2-IAELEAALANK-COOH                 | * |                |
| NH2-ITVLDNDGNR-COOH                  | * |                |
| NH2-ITVLDNDGNRKPISNGAFYR-COOH        | * |                |
| NH2-KPISNGAFYR-COOH                  | * |                |
| NH2-KYSVGM<Mox>LC<Cmm*>QVLAAM<       | * |                |
| NH2-LITLLPNWIDK-COOH                 | * |                |
| NH2-LITLLPNWIDKLGDE-COOH             | * |                |
| NH2-QVPAEAEEM<Mox>GGEKVEEVAAEQA      | * |                |
| NH2-QVPAEAEEM<Mox>GGEKVEEVAAEQA      | * |                |
| NH2-QVPAEAEEM<Mox>GGEKVEEVAAEQA      | * |                |
| NH2-QVPAEAEEMGGEKVEEVAAEQAPNDEK      | * |                |
| NH2-QVPAEAEEMGGEKVEEVAAEQAPNDEK      | * |                |
| NH2-VHPEDRGEM<Mox>ELR-COOH           | * |                |

NH2-VHPEDRGEMELR-COOH \*

NH2-HLSSQQLANEAGVSQSSVVK-COOH \*

NH2-LADYLLLQPDTAR-COOH \*

NH2-LALSEALASQPESPSVPIHNQIR-COOH \*

NH2-VLAITGFTPNALQQR-COOH \*

#Gln->pyro-Glu (N-term Q)#-QAGYTVVTTS \*

NH2-ASGTEHHGGVC<Cmm\*>FLIK-COOH \*

NH2-AWFIQSVTPR-COOH \*

NH2-AYHVVDEAELTK-COOH \*

NH2-GVVVQDAALLESAAIR-COOH \*

NH2-KAYHVVDEAELTK-COOH \*

NH2-KWEDSPWR-COOH \*

NH2-M<Mox>VLVLGQEYEGLPDAAR-COOH \*

NH2-M<Mox>VLVLGQEYEGLPDAARDPNDL \*

NH2-MVLVLGQEYEGLPDAAR-COOH \*

NH2-MVLVLGQEYEGLPDAARDPNDLR-COO \*

NH2-QAGYTVVTTSSEQGKPLFK-COOH \*

NH2-SFIDPEVLR-COOH \*

NH2-SFIDPEVLR-COOH \*

NH2-TAEGGAEHVQPITGDNIVNVLDDFR-CO \*

NH2-VYGENAC<Cmm\*>QALFQSRPEAIVR-C \*

NH2-WEDSPWR-COOH \*

NH2-AALANLFSELPSK-COOH \*

NH2-ALWLLAGSASR-COOH \*

NH2-IIAGEIQARPEQVDAAVR-COOH \*

NH2-AYIGQHM<Mox>PLYC<Cmm\*>SAM<I \*

NH2-EDDHAILYK-COOH \*

NH2-ESGAAM<Mox>DREENELGVSC<Cmm: \*

NH2-ETAQAISNELGFTVR-COOH \*

NH2-IYM<Mox>AFGHPDYVK-COOH \*

NH2-IYMAFGHPDYVK-COOH \*

NH2-LLQGLQSC<Cmm\*>GYVTTAPAAGSYR- \*

NH2-NTITELPAM<Mox>FDELAHIR-COOH \*

NH2-NTITELPAMFDELAHIR-COOH \*

NH2-SYWESHQHEIQPLTR-COOH \*

NH2-VPYAVSISLSTSR-COOH \*

NH2-ATAFAISVINDK-COOH \*

PD 2nd control

|                                 |   |                |                |                |
|---------------------------------|---|----------------|----------------|----------------|
| NH2-ATIPLLINLLK-COOH            | * |                |                |                |
| NH2-ATIPLLINLLKDPNGDVR-COOH     | * |                |                |                |
| NH2-DIGAFILGQIK-COOH            | * |                |                |                |
| NH2-FDDNEIITSAIDK-COOH          | * |                |                |                |
| NH2-AGFAQVFVLK-COOH             | * | PD 1st control | PD 2nd control | PD 3rd control |
| NH2-ANNVGELEK-COOH              | * |                |                | PD 3rd control |
| NH2-LKELAAATSSADEGASVAYK-COOH   | * |                |                |                |
| NH2-IEIEAIAVR-COOH              | * |                |                | PD 3rd control |
| NH2-TGEVPADVAAQAR-COOH          | * |                |                |                |
| NH2-TIATENAPAAIGPYVQGVDLGNM<Mox | * |                |                |                |
| NH2-TPLWLASLIR-COOH             | * |                |                |                |
| NH2-AFFVVGNALDENPLIR-COOH       | * |                |                |                |
| NH2-ILGISLAQLR-COOH             | * |                |                |                |
| NH2-VASLHVPVVSSAR-COOH          | * |                |                |                |
| NH2-ALEQAIGVELFNR-COOH          | * |                |                |                |
| NH2-ELEIVLS-COOH                | * |                |                |                |
| NH2-HLLQQLESNLAELR-COOH         | * |                |                |                |
| NH2-LVVLNRDELVIPIQAYAYR-COOH    | * |                |                |                |
| NH2-WLYDFLTLEK-COOH             | * |                |                |                |
| NH2-ALEFGPIEELR-COOH            | * | PD 1st control |                |                |
| NH2-TTQYGFFIDSSR-COOH           | * | PD 1st control |                |                |
| NH2-LIIPR-COOH                  | * |                |                | PD 3rd control |
| NH2-DESIR-COOH                  | * |                |                |                |
| NH2-LADDVGIWPLVVIR-COOH         | * |                |                |                |





PD 2nd Exp  
PD 2nd Exp  
PD 2nd Exp  
PD 2nd Exp

PD 2nd Exp

PD 1st Exp

PD 2nd Exp PD 3rd Exp  
PD 2nd Exp PD 3rd Exp

PD 3rd Exp

PD 1st Exp PD 2nd Exp

PD 1st Exp

PD 1st Exp PD 2nd Exp  
PD 2nd Exp

PD 1st Exp

PD 2nd Exp

PD 2nd Exp PD 3rd Exp

PD 1st Exp PD 2nd Exp PD 3rd Exp

PD 2nd Exp PD 3rd Exp

PD 1st Exp PD 2nd Exp PD 3rd Exp

PD 2nd Exp PD 3rd Exp

PD 3rd Exp

PD 2nd Exp

PD 1st Exp PD 2nd Exp PD 3rd Exp

PD 2nd Exp

PD 2nd Exp

PD 2nd Exp PD 3rd Exp

PD 2nd Exp PD 3rd Exp

PD 2nd Exp PD 3rd Exp

PD 2nd Exp

PD 2nd Exp

PD 2nd Exp PD 3rd Exp

PD 3rd Exp



PD 2nd Exp PD 3rd Exp  
PD 2nd Exp  
PD 1st Exp PD 2nd Exp PD 3rd Exp  
PD 1st Exp PD 2nd Exp PD 3rd Exp  
PD 3rd Exp  
PD 3rd Exp  
PD 2nd Exp  
PD 2nd Exp  
PD 2nd Exp  
PD 2nd Exp PD 3rd Exp  
PD 2nd Exp  
PD 2nd Exp PD 3rd Exp  
PD 2nd Exp  
PD 2nd Exp  
PD 2nd Exp PD 3rd Exp  
PD 1st Exp PD 2nd Exp PD 3rd Exp  
PD 2nd Exp PD 3rd Exp  
PD 2nd Exp  
PD 2nd Exp  
PD 2nd Exp  
PD 1st Exp PD 2nd Exp  
PD 1st Exp PD 2nd Exp PD 3rd Exp  
PD 1st Exp PD 2nd Exp PD 3rd Exp  
PD 1st Exp  
PD 2nd Exp  
PD 2nd Exp  
PD 1st Exp PD 2nd Exp PD 3rd Exp  
PD 2nd Exp  
PD 1st Exp PD 2nd Exp  
PD 2nd Exp  
PD 1st Exp PD 2nd Exp  
PD 2nd Exp  
PD 1st Exp PD 2nd Exp  
PD 2nd Exp  
PD 2nd Exp PD 3rd Exp

PD 1st Exp PD 2nd Exp  
PD 2nd Exp  
PD 2nd Exp  
PD 2nd Exp  
PD 1st Exp PD 2nd Exp PD 3rd Exp  
PD 2nd Exp  
PD 2nd Exp  
PD 1st Exp PD 2nd Exp PD 3rd Exp  
PD 2nd Exp  
PD 2nd Exp  
PD 2nd Exp  
PD 2nd Exp  
PD 1st Exp PD 2nd Exp  
PD 2nd Exp  
PD 2nd Exp  
PD 1st Exp PD 2nd Exp  
PD 3rd Exp  
PD 1st Exp  
PD 2nd Exp  
PD 2nd Exp  
PD 2nd Exp  
PD 2nd Exp

PD 2nd Exp  
PD 2nd Exp  
PD 2nd Exp  
PD 2nd Exp  
PD 2nd Exp  
PD 2nd Exp  
PD 2nd Exp

PD 1st Exp

PD 2nd Exp

PD 1st Exp

PD 2nd Exp

PD 2nd Exp

PD 1st Exp

PD 2nd Exp  
PD 2nd Exp  
PD 2nd Exp

PD 3rd Exp

PD 2nd Exp PD 3rd Exp

PD 2nd Exp PD 3rd Exp

PD 1st Exp

PD 3rd Exp

PD 3rd Exp

PD 3rd Exp

PD 3rd Exp

PD 1st Exp

PD 2nd Exp

PD 1st Exp

PD 1st Exp

PD 3rd Exp

PD 3rd Exp

PD 1st Exp

PD 2nd Exp PD 3rd Exp

PD 2nd Exp

PD 2nd Exp  
PD 2nd Exp  
PD 2nd Exp  
PD 2nd Exp  
PD 2nd Exp PD 3rd Exp  
PD 2nd Exp

PD 1st Exp  
PD 1st Exp

PD 2nd Exp  
PD 2nd Exp

PD 1st Exp

PD 3rd Exp

PD 2nd Exp  
PD 2nd Exp

PD 1st Exp PD 2nd Exp PD 3rd Exp  
PD 3rd Exp  
PD 3rd Exp

PD 2nd Exp PD 3rd Exp  
PD 2nd Exp

PD 1st Exp PD 2nd Exp  
PD 2nd Exp

PD 1st Exp PD 2nd Exp PD 3rd Exp  
PD 1st Exp PD 2nd Exp PD 3rd Exp

PD 2nd Exp PD 3rd Exp  
PD 2nd Exp

PD 2nd Exp  
PD 2nd Exp PD 3rd Exp

PD 2nd Exp

PD 3rd Exp

PD 1st Exp PD 2nd Exp  
PD 2nd Exp

PD 1st Exp PD 2nd Exp PD 3rd Exp

PD 2nd Exp PD 3rd Exp  
PD 2nd Exp

PD 2nd Exp PD 3rd Exp

PD 2nd Exp

PD 2nd Exp

PD 2nd Exp PD 3rd Exp

PD 2nd Exp PD 3rd Exp

PD 2nd Exp

PD 2nd Exp PD 3rd Exp

PD 1st Exp PD 2nd Exp PD 3rd Exp

PD 2nd Exp PD 3rd Exp

PD 2nd Exp

PD 1st Exp PD 2nd Exp PD 3rd Exp

PD 2nd Exp

PD 2nd Exp

PD 2nd Exp PD 3rd Exp

PD 2nd Exp

PD 2nd Exp PD 3rd Exp

PD 2nd Exp

PD 1st Exp PD 2nd Exp

PD 2nd Exp

PD 2nd Exp

PD 1st Exp

PD 1st Exp PD 2nd Exp

PD 2nd Exp

PD 2nd Exp

PD 2nd Exp

PD 2nd Exp

PD 1st Exp PD 2nd Exp

PD 2nd Exp

PD 2nd Exp

PD 2nd Exp

PD 1st Exp PD 2nd Exp



|            |            |            |
|------------|------------|------------|
|            | PD 2nd Exp | PD 3rd Exp |
| PD 1st Exp | PD 2nd Exp |            |
|            | PD 2nd Exp |            |
| PD 1st Exp | PD 2nd Exp | PD 3rd Exp |
|            | PD 2nd Exp |            |
| PD 1st Exp | PD 2nd Exp |            |
|            | PD 2nd Exp |            |
|            | PD 2nd Exp |            |
| PD 1st Exp | PD 2nd Exp |            |
|            | PD 2nd Exp |            |
| PD 1st Exp | PD 2nd Exp | PD 3rd Exp |
| PD 1st Exp | PD 2nd Exp | PD 3rd Exp |
| PD 1st Exp | PD 2nd Exp |            |
| PD 1st Exp | PD 2nd Exp |            |
|            | PD 2nd Exp | PD 3rd Exp |
| PD 1st Exp | PD 2nd Exp | PD 3rd Exp |
|            | PD 2nd Exp | PD 3rd Exp |
| PD 1st Exp | PD 2nd Exp |            |
| PD 1st Exp | PD 2nd Exp |            |
|            | PD 2nd Exp |            |
|            | PD 2nd Exp |            |
| PD 1st Exp |            |            |
| PD 1st Exp | PD 2nd Exp |            |
|            |            | PD 3rd Exp |
| PD 1st Exp |            |            |
| PD 1st Exp |            | PD 3rd Exp |
| PD 1st Exp |            |            |

PD 1st Exp

PD 2nd Exp  
PD 2nd Exp  
PD 2nd Exp  
PD 2nd Exp  
PD 2nd Exp  
PD 2nd Exp  
PD 2nd Exp  
PD 2nd Exp  
PD 2nd Exp  
PD 2nd Exp

PD 1st Exp

PD 2nd Exp  
PD 2nd Exp  
PD 2nd Exp PD 3rd Exp  
PD 2nd Exp PD 3rd Exp  
PD 2nd Exp  
PD 2nd Exp  
PD 2nd Exp PD 3rd Exp  
PD 2nd Exp

PD 1st Exp

PD 2nd Exp  
PD 2nd Exp

PD 1st Exp

PD 2nd Exp  
PD 2nd Exp PD 3rd Exp  
PD 2nd Exp  
PD 2nd Exp

PD 1st Exp

PD 2nd Exp PD 3rd Exp  
PD 2nd Exp PD 3rd Exp  
PD 2nd Exp PD 3rd Exp  
PD 2nd Exp

PD 2nd Exp  
PD 2nd Exp  
PD 2nd Exp  
PD 2nd Exp  
PD 2nd Exp  
PD 2nd Exp

|            |            |            |
|------------|------------|------------|
|            | PD 2nd Exp |            |
|            | PD 2nd Exp |            |
| PD 1st Exp | PD 2nd Exp |            |
| PD 1st Exp | PD 2nd Exp |            |
| PD 1st Exp | PD 2nd Exp |            |
| PD 1st Exp | PD 2nd Exp |            |
| PD 1st Exp | PD 2nd Exp |            |
|            | PD 2nd Exp |            |
|            | PD 2nd Exp |            |
| PD 1st Exp | PD 2nd Exp |            |
|            |            | PD 3rd Exp |
|            | PD 2nd Exp | PD 3rd Exp |
|            |            | PD 3rd Exp |
|            | PD 2nd Exp | PD 3rd Exp |
|            |            | PD 3rd Exp |
|            |            | PD 3rd Exp |
| PD 1st Exp | PD 2nd Exp | PD 3rd Exp |
|            | PD 2nd Exp | PD 3rd Exp |
| PD 1st Exp | PD 2nd Exp | PD 3rd Exp |
|            |            |            |
| PD 1st Exp | PD 2nd Exp | PD 3rd Exp |
| PD 1st Exp | PD 2nd Exp | PD 3rd Exp |
|            | PD 2nd Exp | PD 3rd Exp |
| PD 1st Exp | PD 2nd Exp | PD 3rd Exp |
|            | PD 2nd Exp | PD 3rd Exp |
|            |            | PD 3rd Exp |
|            |            | PD 3rd Exp |
|            |            | PD 3rd Exp |
|            | PD 2nd Exp |            |
|            | PD 2nd Exp | PD 3rd Exp |
|            | PD 2nd Exp |            |
| PD 1st Exp | PD 2nd Exp | PD 3rd Exp |
|            | PD 2nd Exp | PD 3rd Exp |
| PD 1st Exp | PD 2nd Exp | PD 3rd Exp |
|            | PD 2nd Exp | PD 3rd Exp |

PD 2nd Exp PD 3rd Exp  
PD 2nd Exp PD 3rd Exp  
PD 3rd Exp  
PD 2nd Exp PD 3rd Exp  
PD 2nd Exp PD 3rd Exp  
PD 1st Exp PD 2nd Exp PD 3rd Exp  
PD 3rd Exp  
PD 2nd Exp PD 3rd Exp  
PD 2nd Exp PD 3rd Exp  
PD 2nd Exp PD 3rd Exp

PD 3rd Exp  
PD 3rd Exp  
PD 2nd Exp PD 3rd Exp  
PD 1st Exp PD 2nd Exp PD 3rd Exp  
PD 3rd Exp  
PD 2nd Exp PD 3rd Exp  
PD 3rd Exp

PD 2nd Exp PD 3rd Exp  
PD 2nd Exp PD 3rd Exp  
PD 1st Exp PD 2nd Exp PD 3rd Exp  
PD 3rd Exp

PD 1st Exp PD 2nd Exp PD 3rd Exp  
PD 1st Exp PD 2nd Exp PD 3rd Exp  
PD 1st Exp PD 2nd Exp PD 3rd Exp  
PD 3rd Exp  
PD 3rd Exp  
PD 3rd Exp  
PD 3rd Exp

PD 2nd Exp PD 3rd Exp  
PD 2nd Exp PD 3rd Exp  
PD 2nd Exp PD 3rd Exp  
PD 2nd Exp PD 3rd Exp  
PD 3rd Exp  
PD 2nd Exp PD 3rd Exp  
PD 1st Exp PD 2nd Exp PD 3rd Exp  
PD 3rd Exp

PD 2nd Exp PD 3rd Exp  
PD 2nd Exp PD 3rd Exp  
PD 2nd Exp PD 3rd Exp

PD 2nd Exp  
PD 2nd Exp PD 3rd Exp  
PD 2nd Exp  
PD 1st Exp PD 2nd Exp PD 3rd Exp

PD 2nd Exp  
PD 2nd Exp  
PD 2nd Exp  
PD 3rd Exp

PD 2nd Exp  
PD 2nd Exp  
PD 2nd Exp  
PD 2nd Exp PD 3rd Exp  
PD 2nd Exp

PD 1st Exp PD 2nd Exp PD 3rd Exp  
PD 3rd Exp

PD 1st Exp  
PD 2nd Exp

PD 2nd Exp  
PD 1st Exp PD 2nd Exp PD 3rd Exp

PD 2nd Exp  
PD 2nd Exp

PD 2nd Exp

PD 3rd Exp

PD 1st Exp PD 2nd Exp PD 3rd Exp  
PD 2nd Exp PD 3rd Exp  
PD 2nd Exp

PD 1st Exp PD 2nd Exp PD 3rd Exp

PD 2nd Exp

PD 2nd Exp

PD 2nd Exp

PD 1st Exp PD 2nd Exp PD 3rd Exp  
PD 2nd Exp PD 3rd Exp  
PD 2nd Exp PD 3rd Exp  
PD 2nd Exp PD 3rd Exp  
PD 2nd Exp

PD 2nd Exp PD 3rd Exp

PD 2nd Exp PD 3rd Exp

PD 1st Exp PD 2nd Exp PD 3rd Exp

PD 2nd Exp

PD 2nd Exp

PD 2nd Exp PD 3rd Exp

PD 1st Exp PD 2nd Exp PD 3rd Exp

PD 1st Exp PD 2nd Exp PD 3rd Exp  
PD 2nd Exp PD 3rd Exp  
PD 2nd Exp PD 3rd Exp  
PD 3rd Exp

PD 1st Exp  
PD 1st Exp  
PD 1st Exp PD 2nd Exp  
PD 1st Exp PD 3rd Exp  
PD 2nd Exp PD 3rd Exp  
PD 2nd Exp PD 3rd Exp  
PD 1st Exp PD 2nd Exp PD 3rd Exp  
PD 3rd Exp

PD 1st Exp  
PD 2nd Exp PD 3rd Exp  
PD 1st Exp PD 2nd Exp PD 3rd Exp  
PD 2nd Exp PD 3rd Exp  
PD 1st Exp PD 2nd Exp PD 3rd Exp  
PD 1st Exp  
PD 1st Exp PD 2nd Exp  
PD 2nd Exp  
PD 1st Exp PD 2nd Exp PD 3rd Exp  
PD 1st Exp  
PD 2nd Exp PD 3rd Exp  
PD 1st Exp PD 2nd Exp PD 3rd Exp  
PD 2nd Exp PD 3rd Exp

PD 1st Exp PD 2nd Exp PD 3rd Exp  
PD 2nd Exp  
PD 2nd Exp  
PD 1st Exp PD 2nd Exp PD 3rd Exp  
PD 2nd Exp  
PD 1st Exp PD 2nd Exp PD 3rd Exp  
PD 1st Exp PD 2nd Exp  
PD 2nd Exp  
PD 1st Exp PD 3rd Exp  
PD 2nd Exp

PD 1st Exp PD 2nd Exp PD 3rd Exp

PD 1st Exp PD 2nd Exp PD 3rd Exp

PD 1st Exp PD 2nd Exp PD 3rd Exp

PD 1st Exp PD 2nd Exp PD 3rd Exp

PD 1st Exp

PD 1st Exp PD 2nd Exp PD 3rd Exp

PD 1st Exp PD 2nd Exp PD 3rd Exp

PD 1st Exp PD 2nd Exp PD 3rd Exp

PD 2nd Exp PD 3rd Exp

PD 1st Exp PD 2nd Exp PD 3rd Exp

PD 1st Exp PD 2nd Exp PD 3rd Exp

PD 2nd Exp

PD 2nd Exp PD 3rd Exp

PD 1st Exp

PD 1st Exp PD 2nd Exp PD 3rd Exp

PD 1st Exp PD 2nd Exp PD 3rd Exp

PD 2nd Exp PD 3rd Exp

PD 1st Exp PD 2nd Exp PD 3rd Exp

PD 2nd Exp PD 3rd Exp

PD 3rd Exp

PD 2nd Exp PD 3rd Exp

PD 1st Exp PD 3rd Exp

PD 2nd Exp PD 3rd Exp

PD 3rd Exp

PD 1st Exp PD 2nd Exp PD 3rd Exp

PD 2nd Exp

PD 1st Exp PD 2nd Exp PD 3rd Exp

PD 2nd Exp

PD 1st Exp PD 2nd Exp

PD 1st Exp PD 2nd Exp PD 3rd Exp

PD 2nd Exp



PD 1st Exp PD 2nd Exp PD 3rd Exp  
PD 1st Exp PD 2nd Exp PD 3rd Exp  
PD 2nd Exp  
PD 2nd Exp PD 3rd Exp  
PD 2nd Exp PD 3rd Exp  
PD 2nd Exp

PD 1st Exp PD 2nd Exp  
PD 2nd Exp  
PD 1st Exp PD 2nd Exp PD 3rd Exp  
PD 2nd Exp PD 3rd Exp  
PD 1st Exp PD 2nd Exp  
PD 2nd Exp  
PD 2nd Exp  
PD 2nd Exp PD 3rd Exp  
PD 2nd Exp  
PD 2nd Exp PD 3rd Exp  
PD 2nd Exp  
PD 2nd Exp  
PD 2nd Exp PD 3rd Exp  
PD 2nd Exp

PD 1st Exp  
PD 2nd Exp PD 3rd Exp  
PD 1st Exp PD 2nd Exp  
PD 2nd Exp PD 3rd Exp  
PD 1st Exp PD 2nd Exp PD 3rd Exp  
PD 1st Exp PD 2nd Exp PD 3rd Exp  
PD 1st Exp PD 2nd Exp PD 3rd Exp  
PD 2nd Exp PD 3rd Exp  
PD 2nd Exp  
PD 2nd Exp

PD 2nd Exp  
PD 2nd Exp  
PD 2nd Exp  
PD 2nd Exp  
PD 2nd Exp  
PD 2nd Exp PD 3rd Exp  
PD 2nd Exp

PD 1st Exp PD 2nd Exp PD 3rd Exp  
PD 1st Exp PD 2nd Exp PD 3rd Exp  
PD 1st Exp PD 2nd Exp PD 3rd Exp  
PD 1st Exp PD 2nd Exp PD 3rd Exp  
PD 2nd Exp PD 3rd Exp  
PD 2nd Exp PD 3rd Exp  
PD 2nd Exp  
PD 2nd Exp

PD 1st Exp PD 2nd Exp PD 3rd Exp  
PD 1st Exp PD 2nd Exp PD 3rd Exp  
PD 1st Exp PD 2nd Exp PD 3rd Exp  
PD 1st Exp PD 2nd Exp PD 3rd Exp  
PD 2nd Exp

PD 1st Exp PD 2nd Exp PD 3rd Exp  
PD 2nd Exp

PD 1st Exp PD 2nd Exp PD 3rd Exp  
PD 1st Exp PD 2nd Exp PD 3rd Exp  
PD 2nd Exp

PD 1st Exp PD 2nd Exp PD 3rd Exp  
PD 1st Exp PD 2nd Exp PD 3rd Exp  
PD 1st Exp PD 2nd Exp

PD 2nd Exp PD 3rd Exp  
PD 2nd Exp PD 3rd Exp  
PD 2nd Exp  
PD 2nd Exp  
PD 2nd Exp  
PD 2nd Exp

PD 1st Exp PD 2nd Exp PD 3rd Exp  
PD 2nd Exp

PD 1st Exp PD 2nd Exp PD 3rd Exp

PD 1st Exp PD 2nd Exp  
PD 1st Exp PD 2nd Exp  
PD 1st Exp PD 2nd Exp PD 3rd Exp  
PD 1st Exp PD 2nd Exp  
PD 1st Exp PD 2nd Exp PD 3rd Exp  
PD 1st Exp PD 2nd Exp PD 3rd Exp  
PD 1st Exp PD 2nd Exp PD 3rd Exp  
PD 1st Exp PD 2nd Exp PD 3rd Exp  
PD 1st Exp PD 2nd Exp

PD 2nd Exp  
PD 3rd Exp  
PD 2nd Exp  
PD 3rd Exp  
PD 2nd Exp PD 3rd Exp  
PD 2nd Exp

PD 1st Exp PD 2nd Exp  
PD 1st Exp PD 2nd Exp  
PD 1st Exp PD 2nd Exp PD 3rd Exp  
PD 1st Exp PD 2nd Exp PD 3rd Exp  
PD 2nd Exp  
PD 2nd Exp PD 3rd Exp  
PD 2nd Exp PD 3rd Exp  
PD 2nd Exp  
PD 1st Exp PD 2nd Exp PD 3rd Exp  
PD 2nd Exp PD 3rd Exp

PD 2nd Exp

PD 1st Exp PD 2nd Exp  
PD 1st Exp PD 3rd Exp  
PD 1st Exp PD 3rd Exp  
PD 3rd Exp  
PD 3rd Exp  
PD 1st Exp  
PD 1st Exp PD 2nd Exp PD 3rd Exp  
PD 1st Exp  
PD 1st Exp  
PD 1st Exp  
PD 2nd Exp  
PD 1st Exp PD 2nd Exp PD 3rd Exp  
PD 1st Exp  
PD 2nd Exp  
PD 1st Exp  
PD 2nd Exp  
PD 2nd Exp  
PD 2nd Exp PD 3rd Exp  
PD 1st Exp PD 2nd Exp PD 3rd Exp  
PD 2nd Exp PD 3rd Exp  
PD 1st Exp  
PD 1st Exp  
PD 1st Exp  
PD 2nd Exp  
PD 2nd Exp PD 3rd Exp  
PD 2nd Exp  
PD 3rd Exp  
PD 2nd Exp  
PD 2nd Exp PD 3rd Exp  
PD 2nd Exp

PD 1st Exp PD 2nd Exp PD 3rd Exp  
PD 1st Exp PD 2nd Exp PD 3rd Exp  
PD 1st Exp PD 2nd Exp PD 3rd Exp  
PD 2nd Exp PD 3rd Exp  
PD 2nd Exp PD 3rd Exp  
PD 2nd Exp  
PD 2nd Exp  
PD 1st Exp PD 2nd Exp  
PD 2nd Exp PD 3rd Exp  
PD 2nd Exp

PD 2nd Exp  
PD 2nd Exp

PD 1st Exp PD 2nd Exp

PD 1st Exp  
PD 1st Exp  
PD 1st Exp  
PD 1st Exp  
PD 1st Exp  
PD 1st Exp PD 3rd Exp

PD 2nd Exp  
PD 2nd Exp  
PD 2nd Exp  
PD 1st Exp PD 2nd Exp  
PD 2nd Exp  
PD 2nd Exp  
PD 2nd Exp  
PD 2nd Exp

PD 1st Exp PD 2nd Exp PD 3rd Exp  
PD 1st Exp PD 2nd Exp PD 3rd Exp  
PD 1st Exp PD 2nd Exp PD 3rd Exp  
PD 1st Exp PD 2nd Exp PD 3rd Exp  
PD 2nd Exp PD 3rd Exp  
PD 1st Exp PD 2nd Exp PD 3rd Exp

PD 1st Exp PD 2nd Exp PD 3rd Exp  
PD 2nd Exp  
PD 1st Exp PD 2nd Exp PD 3rd Exp  
PD 1st Exp PD 2nd Exp PD 3rd Exp  
PD 2nd Exp  
PD 1st Exp  
PD 3rd Exp  
PD 2nd Exp PD 3rd Exp  
PD 1st Exp PD 2nd Exp PD 3rd Exp  
PD 1st Exp PD 2nd Exp PD 3rd Exp  
PD 2nd Exp  
PD 1st Exp PD 3rd Exp  
PD 2nd Exp  
PD 2nd Exp PD 3rd Exp  
PD 2nd Exp PD 3rd Exp  
PD 2nd Exp  
PD 2nd Exp PD 3rd Exp  
PD 1st Exp

PD 2nd Exp

PD 2nd Exp

PD 2nd Exp

PD 2nd Exp

PD 1st Exp PD 2nd Exp

PD 1st Exp PD 2nd Exp

PD 2nd Exp

PD 2nd Exp

PD 2nd Exp

PD 2nd Exp

PD 1st Exp PD 2nd Exp

PD 2nd Exp

PD 2nd Exp

PD 2nd Exp

PD 2nd Exp

PD 1st Exp PD 2nd Exp

PD 2nd Exp

PD 2nd Exp

PD 2nd Exp

PD 2nd Exp

PD 2nd Exp

PD 2nd Exp

PD 2nd Exp

PD 1st Exp PD 2nd Exp PD 3rd Exp

PD 1st Exp PD 2nd Exp PD 3rd Exp

PD 2nd Exp

PD 2nd Exp

PD 2nd Exp

PD 2nd Exp  
PD 2nd Exp  
PD 2nd Exp  
PD 1st Exp  
PD 1st Exp PD 2nd Exp  
PD 1st Exp  
PD 1st Exp  
PD 1st Exp PD 3rd Exp  
PD 2nd Exp PD 3rd Exp  
PD 2nd Exp  
PD 2nd Exp PD 3rd Exp  
PD 2nd Exp  
PD 2nd Exp  
PD 2nd Exp  
PD 2nd Exp  
PD 3rd Exp  
PD 1st Exp PD 2nd Exp  
PD 1st Exp  
PD 3rd Exp  
PD 1st Exp  
PD 2nd Exp PD 3rd Exp  
PD 1st Exp PD 3rd Exp  
PD 3rd Exp  
PD 1st Exp  
PD 1st Exp PD 2nd Exp PD 3rd Exp  
PD 3rd Exp  
PD 2nd Exp PD 3rd Exp  
PD 1st Exp PD 3rd Exp  
PD 2nd Exp  
PD 1st Exp PD 3rd Exp  
PD 2nd Exp  
PD 2nd Exp  
PD 1st Exp  
PD 1st Exp PD 2nd Exp PD 3rd Exp  
PD 2nd Exp  
PD 1st Exp PD 2nd Exp PD 3rd Exp  
PD 2nd Exp



|            |            |            |
|------------|------------|------------|
| PD 1st Exp | PD 2nd Exp |            |
| PD 1st Exp | PD 2nd Exp |            |
|            | PD 2nd Exp |            |
|            | PD 2nd Exp |            |
|            | PD 2nd Exp | PD 3rd Exp |
|            | PD 2nd Exp |            |
| PD 1st Exp | PD 2nd Exp | PD 3rd Exp |
| PD 1st Exp |            |            |
|            | PD 2nd Exp |            |
|            | PD 2nd Exp |            |
| PD 1st Exp | PD 2nd Exp | PD 3rd Exp |
|            | PD 2nd Exp | PD 3rd Exp |
| PD 1st Exp | PD 2nd Exp | PD 3rd Exp |
|            | PD 2nd Exp | PD 3rd Exp |
|            | PD 2nd Exp | PD 3rd Exp |
|            | PD 2nd Exp | PD 3rd Exp |
|            | PD 2nd Exp | PD 3rd Exp |
|            | PD 2nd Exp |            |
|            |            | PD 3rd Exp |
|            |            | PD 3rd Exp |
| PD 1st Exp | PD 2nd Exp | PD 3rd Exp |
|            | PD 2nd Exp | PD 3rd Exp |
|            | PD 2nd Exp | PD 3rd Exp |
|            | PD 2nd Exp | PD 3rd Exp |
|            | PD 2nd Exp | PD 3rd Exp |
| PD 1st Exp | PD 2nd Exp | PD 3rd Exp |
|            | PD 2nd Exp | PD 3rd Exp |
|            | PD 2nd Exp | PD 3rd Exp |
|            |            | PD 3rd Exp |
| PD 1st Exp | PD 2nd Exp | PD 3rd Exp |
| PD 1st Exp | PD 2nd Exp | PD 3rd Exp |
| PD 1st Exp | PD 2nd Exp | PD 3rd Exp |
|            | PD 2nd Exp | PD 3rd Exp |
|            | PD 2nd Exp | PD 3rd Exp |
|            | PD 2nd Exp | PD 3rd Exp |
| PD 1st Exp | PD 2nd Exp | PD 3rd Exp |
| PD 1st Exp | PD 2nd Exp | PD 3rd Exp |

PD 2nd Exp PD 3rd Exp  
PD 2nd Exp PD 3rd Exp  
PD 2nd Exp  
PD 2nd Exp PD 3rd Exp  
PD 2nd Exp PD 3rd Exp  
PD 2nd Exp PD 3rd Exp  
PD 3rd Exp

PD 1st Exp

PD 1st Exp PD 2nd Exp PD 3rd Exp  
PD 2nd Exp PD 3rd Exp  
PD 3rd Exp  
PD 2nd Exp PD 3rd Exp

PD 1st Exp PD 2nd Exp PD 3rd Exp  
PD 1st Exp PD 2nd Exp  
PD 3rd Exp

PD 2nd Exp  
PD 2nd Exp PD 3rd Exp  
PD 1st Exp PD 2nd Exp PD 3rd Exp  
PD 2nd Exp PD 3rd Exp  
PD 2nd Exp

PD 2nd Exp PD 3rd Exp  
PD 1st Exp PD 2nd Exp PD 3rd Exp  
PD 3rd Exp

PD 2nd Exp  
PD 2nd Exp  
PD 1st Exp PD 2nd Exp  
PD 2nd Exp  
PD 2nd Exp

PD 1st Exp

PD 1st Exp

PD 1st Exp

PD 1st Exp PD 2nd Exp PD 3rd Exp

PD 1st Exp

PD 2nd Exp

PD 1st Exp PD 2nd Exp

PD 1st Exp

PD 1st Exp PD 2nd Exp  
PD 2nd Exp PD 3rd Exp  
PD 2nd Exp  
PD 2nd Exp  
PD 3rd Exp  
PD 2nd Exp PD 3rd Exp  
PD 2nd Exp  
PD 2nd Exp PD 3rd Exp  
PD 1st Exp PD 2nd Exp  
PD 2nd Exp  
PD 2nd Exp PD 3rd Exp  
PD 2nd Exp  
PD 1st Exp PD 2nd Exp PD 3rd Exp  
PD 2nd Exp  
PD 2nd Exp PD 3rd Exp  
PD 2nd Exp  
PD 2nd Exp  
PD 2nd Exp  
PD 2nd Exp PD 3rd Exp  
PD 2nd Exp PD 3rd Exp  
PD 2nd Exp  
PD 1st Exp PD 2nd Exp PD 3rd Exp  
PD 2nd Exp PD 3rd Exp  
PD 2nd Exp  
PD 2nd Exp PD 3rd Exp  
PD 2nd Exp  
PD 2nd Exp PD 3rd Exp  
PD 2nd Exp  
PD 2nd Exp  
PD 2nd Exp



PD 1st Exp PD 2nd Exp PD 3rd Exp  
PD 2nd Exp  
PD 2nd Exp  
PD 2nd Exp  
PD 1st Exp PD 2nd Exp PD 3rd Exp  
PD 1st Exp PD 2nd Exp PD 3rd Exp  
PD 1st Exp PD 2nd Exp PD 3rd Exp  
PD 2nd Exp PD 3rd Exp  
PD 2nd Exp  
PD 1st Exp PD 2nd Exp PD 3rd Exp  
PD 2nd Exp PD 3rd Exp  
PD 2nd Exp  
PD 2nd Exp PD 3rd Exp  
PD 1st Exp PD 2nd Exp PD 3rd Exp  
PD 2nd Exp  
PD 2nd Exp  
PD 2nd Exp  
PD 2nd Exp PD 3rd Exp  
PD 2nd Exp  
PD 2nd Exp  
PD 1st Exp PD 2nd Exp PD 3rd Exp  
PD 2nd Exp PD 3rd Exp  
PD 1st Exp PD 2nd Exp PD 3rd Exp  
PD 2nd Exp PD 3rd Exp  
PD 1st Exp PD 2nd Exp PD 3rd Exp  
PD 1st Exp PD 2nd Exp PD 3rd Exp  
PD 1st Exp PD 2nd Exp PD 3rd Exp  
PD 2nd Exp  
PD 3rd Exp  
PD 1st Exp PD 2nd Exp  
PD 2nd Exp PD 3rd Exp  
PD 2nd Exp PD 3rd Exp  
PD 2nd Exp PD 3rd Exp

PD 2nd Exp PD 3rd Exp  
PD 2nd Exp PD 3rd Exp  
PD 1st Exp PD 2nd Exp  
PD 1st Exp PD 2nd Exp PD 3rd Exp  
PD 2nd Exp  
PD 3rd Exp  
PD 3rd Exp  
PD 3rd Exp  
PD 3rd Exp  
PD 2nd Exp PD 3rd Exp  
PD 1st Exp PD 2nd Exp PD 3rd Exp  
PD 2nd Exp  
PD 1st Exp PD 3rd Exp  
PD 1st Exp  
PD 2nd Exp  
PD 2nd Exp

PD 1st Exp  
PD 1st Exp  
PD 1st Exp

PD 2nd Exp  
PD 2nd Exp PD 3rd Exp  
PD 2nd Exp

PD 2nd Exp PD 3rd Exp  
PD 2nd Exp PD 3rd Exp  
PD 2nd Exp  
PD 3rd Exp  
PD 2nd Exp  
PD 2nd Exp

PD 2nd Exp PD 3rd Exp  
PD 3rd Exp  
PD 2nd Exp PD 3rd Exp  
PD 1st Exp PD 2nd Exp PD 3rd Exp  
PD 2nd Exp PD 3rd Exp  
PD 3rd Exp  
PD 2nd Exp  
PD 2nd Exp PD 3rd Exp  
PD 1st Exp PD 2nd Exp PD 3rd Exp  
PD 2nd Exp  
PD 1st Exp  
PD 1st Exp  
PD 2nd Exp PD 3rd Exp  
PD 3rd Exp  
PD 2nd Exp  
PD 2nd Exp PD 3rd Exp

|            |            |            |
|------------|------------|------------|
| PD 1st Exp |            | PD 3rd Exp |
|            | PD 2nd Exp | PD 3rd Exp |
|            |            | PD 3rd Exp |
|            | PD 2nd Exp | PD 3rd Exp |
|            | PD 2nd Exp | PD 3rd Exp |
| PD 1st Exp | PD 2nd Exp |            |
| PD 1st Exp | PD 2nd Exp |            |
|            | PD 2nd Exp |            |
| PD 1st Exp | PD 2nd Exp | PD 3rd Exp |
|            | PD 2nd Exp | PD 3rd Exp |
|            |            | PD 3rd Exp |
|            | PD 2nd Exp | PD 3rd Exp |
|            | PD 2nd Exp |            |
|            | PD 2nd Exp |            |
|            | PD 2nd Exp | PD 3rd Exp |
|            | PD 2nd Exp | PD 3rd Exp |
|            | PD 2nd Exp | PD 3rd Exp |
| PD 1st Exp | PD 2nd Exp | PD 3rd Exp |
|            | PD 2nd Exp |            |
|            | PD 2nd Exp |            |
| PD 1st Exp |            | PD 3rd Exp |
|            |            | PD 3rd Exp |
| PD 1st Exp | PD 2nd Exp | PD 3rd Exp |
|            | PD 2nd Exp | PD 3rd Exp |
|            | PD 2nd Exp |            |
|            | PD 2nd Exp | PD 3rd Exp |
|            | PD 2nd Exp |            |
| PD 1st Exp | PD 2nd Exp | PD 3rd Exp |
|            |            | PD 3rd Exp |
| PD 1st Exp | PD 2nd Exp | PD 3rd Exp |
| PD 1st Exp |            | PD 3rd Exp |
|            | PD 2nd Exp |            |
| PD 1st Exp |            |            |



|            |            |            |
|------------|------------|------------|
| PD 1st Exp | PD 2nd Exp |            |
| PD 1st Exp | PD 2nd Exp |            |
|            | PD 2nd Exp |            |
| PD 1st Exp | PD 2nd Exp |            |
|            | PD 2nd Exp | PD 3rd Exp |
| PD 1st Exp |            |            |
|            | PD 2nd Exp | PD 3rd Exp |
|            |            | PD 3rd Exp |
| PD 1st Exp |            | PD 3rd Exp |
|            | PD 2nd Exp | PD 3rd Exp |
|            | PD 2nd Exp |            |
|            | PD 2nd Exp |            |
| PD 1st Exp | PD 2nd Exp |            |
| PD 1st Exp |            | PD 3rd Exp |
|            | PD 2nd Exp |            |
|            | PD 2nd Exp |            |
|            | PD 2nd Exp |            |
| PD 1st Exp |            | PD 3rd Exp |
|            | PD 2nd Exp |            |
|            | PD 2nd Exp |            |
|            | PD 2nd Exp |            |
| PD 1st Exp | PD 2nd Exp |            |
|            | PD 2nd Exp |            |
| PD 1st Exp | PD 2nd Exp |            |
|            | PD 2nd Exp |            |
|            | PD 2nd Exp |            |
| PD 1st Exp |            |            |
| PD 1st Exp | PD 2nd Exp |            |
|            | PD 2nd Exp |            |
|            | PD 2nd Exp |            |
| PD 1st Exp | PD 2nd Exp |            |

PD 1st Exp PD 2nd Exp  
PD 2nd Exp  
PD 2nd Exp  
PD 2nd Exp  
PD 2nd Exp  
PD 2nd Exp  
PD 1st Exp PD 2nd Exp  
PD 2nd Exp  
PD 2nd Exp PD 3rd Exp  
PD 2nd Exp  
PD 2nd Exp  
PD 2nd Exp  
PD 3rd Exp  
PD 2nd Exp  
PD 2nd Exp PD 3rd Exp

PD 2nd Exp  
PD 2nd Exp  
PD 2nd Exp  
PD 1st Exp  
PD 1st Exp

PD 2nd Exp  
PD 2nd Exp PD 3rd Exp  
PD 2nd Exp PD 3rd Exp  
PD 2nd Exp  
PD 2nd Exp  
PD 2nd Exp  
PD 2nd Exp PD 3rd Exp  
PD 2nd Exp PD 3rd Exp  
PD 2nd Exp  
PD 2nd Exp  
PD 1st Exp PD 2nd Exp



PD 2nd Exp  
PD 2nd Exp  
PD 1st Exp PD 2nd Exp  
PD 2nd Exp  
PD 1st Exp

PD 1st Exp  
PD 3rd Exp  
PD 2nd Exp  
PD 1st Exp  
PD 2nd Exp PD 3rd Exp  
PD 2nd Exp  
PD 2nd Exp

PD 3rd Exp  
PD 3rd Exp

PD 1st Exp PD 2nd Exp PD 3rd Exp

PD 2nd Exp PD 3rd Exp  
PD 3rd Exp

PD 1st Exp PD 2nd Exp PD 3rd Exp  
PD 3rd Exp

PD 1st Exp PD 2nd Exp PD 3rd Exp  
PD 1st Exp PD 2nd Exp PD 3rd Exp  
PD 1st Exp PD 2nd Exp PD 3rd Exp  
PD 3rd Exp

PD 1st Exp PD 2nd Exp PD 3rd Exp  
PD 3rd Exp

PD 2nd Exp PD 3rd Exp

PD 2nd Exp PD 3rd Exp  
PD 2nd Exp PD 3rd Exp  
PD 3rd Exp

PD 1st Exp PD 2nd Exp PD 3rd Exp

PD 2nd Exp PD 3rd Exp  
PD 2nd Exp PD 3rd Exp  
PD 2nd Exp PD 3rd Exp

PD 1st Exp PD 2nd Exp PD 3rd Exp  
PD 3rd Exp  
PD 2nd Exp PD 3rd Exp

PD 3rd Exp

PD 1st Exp PD 2nd Exp PD 3rd Exp  
PD 1st Exp PD 2nd Exp PD 3rd Exp

PD 2nd Exp PD 3rd Exp

PD 1st Exp PD 2nd Exp PD 3rd Exp  
PD 1st Exp PD 2nd Exp

PD 2nd Exp  
PD 2nd Exp PD 3rd Exp  
PD 2nd Exp PD 3rd Exp

PD 1st Exp PD 3rd Exp  
PD 1st Exp PD 2nd Exp PD 3rd Exp

PD 2nd Exp PD 3rd Exp

PD 2nd Exp PD 3rd Exp

PD 2nd Exp  
PD 2nd Exp

PD 3rd Exp  
PD 2nd Exp PD 3rd Exp

PD 3rd Exp

PD 1st Exp PD 3rd Exp  
PD 1st Exp PD 2nd Exp PD 3rd Exp

PD 1st Exp PD 2nd Exp PD 3rd Exp  
PD 1st Exp PD 2nd Exp PD 3rd Exp  
PD 1st Exp PD 2nd Exp PD 3rd Exp  
PD 2nd Exp PD 3rd Exp  
PD 2nd Exp PD 3rd Exp  
PD 2nd Exp PD 3rd Exp  
PD 2nd Exp PD 3rd Exp  
PD 2nd Exp PD 3rd Exp  
PD 2nd Exp PD 3rd Exp  
PD 1st Exp PD 2nd Exp PD 3rd Exp  
PD 1st Exp PD 2nd Exp PD 3rd Exp

PD 2nd Exp PD 3rd Exp  
PD 2nd Exp PD 3rd Exp  
PD 1st Exp PD 2nd Exp PD 3rd Exp  
PD 2nd Exp PD 3rd Exp  
PD 2nd Exp PD 3rd Exp  
PD 2nd Exp

PD 2nd Exp PD 3rd Exp

PD 3rd Exp  
PD 2nd Exp PD 3rd Exp

PD 1st Exp PD 2nd Exp PD 3rd Exp  
PD 1st Exp PD 2nd Exp PD 3rd Exp

PD 1st Exp PD 2nd Exp  
PD 1st Exp PD 2nd Exp PD 3rd Exp  
PD 1st Exp PD 2nd Exp PD 3rd Exp  
PD 2nd Exp PD 3rd Exp  
PD 1st Exp  
PD 2nd Exp PD 3rd Exp  
PD 1st Exp PD 2nd Exp PD 3rd Exp

PD 2nd Exp PD 3rd Exp

PD 2nd Exp

PD 1st Exp PD 2nd Exp PD 3rd Exp  
PD 1st Exp PD 2nd Exp PD 3rd Exp

PD 2nd Exp PD 3rd Exp

PD 2nd Exp



PD 3rd Exp

PD 2nd Exp

PD 1st Exp PD 2nd Exp PD 3rd Exp

PD 1st Exp

PD 1st Exp PD 2nd Exp

PD 2nd Exp

PD 2nd Exp

PD 2nd Exp PD 3rd Exp

PD 3rd Exp

PD 2nd Exp

PD 2nd Exp

PD 2nd Exp PD 3rd Exp

PD 1st Exp PD 2nd Exp PD 3rd Exp

PD 1st Exp PD 2nd Exp

PD 2nd Exp

PD 2nd Exp PD 3rd Exp

PD 3rd Exp

PD 3rd Exp

PD 3rd Exp

PD 1st Exp PD 3rd Exp

PD 1st Exp PD 3rd Exp

PD 1st Exp

PD 1st Exp PD 3rd Exp

PD 1st Exp PD 3rd Exp

PD 3rd Exp  
PD 3rd Exp  
PD 3rd Exp

PD 1st Exp

PD 3rd Exp

PD 2nd Exp  
PD 2nd Exp

PD 2nd Exp

PD 1st Exp PD 2nd Exp PD 2nd Exp PD 3rd Exp

PD 2nd Exp  
PD 2nd Exp

PD 1st Exp PD 2nd Exp  
PD 2nd Exp

PD 1st Exp PD 2nd Exp  
PD 2nd Exp

PD 1st Exp PD 2nd Exp

PD 1st Exp PD 2nd Exp  
PD 2nd Exp

PD 2nd Exp  
PD 2nd Exp  
PD 2nd Exp

PD 1st Exp

PD 1st Exp PD 2nd Exp  
PD 2nd Exp  
PD 2nd Exp

PD 2nd Exp PD 3rd Exp  
PD 2nd Exp PD 3rd Exp

PD 1st Exp PD 2nd Exp PD 3rd Exp  
PD 1st Exp PD 2nd Exp PD 3rd Exp

PD 3rd Exp



PD 1st Exp PD 2nd Exp  
PD 2nd Exp  
PD 1st Exp PD 2nd Exp  
PD 1st Exp PD 2nd Exp PD 3rd Exp

PD 2nd Exp  
PD 2nd Exp  
PD 2nd Exp

PD 1st Exp PD 2nd Exp PD 3rd Exp  
PD 2nd Exp PD 3rd Exp  
PD 3rd Exp

PD 1st Exp PD 2nd Exp PD 3rd Exp  
PD 2nd Exp  
PD 2nd Exp PD 3rd Exp

PD 1st Exp PD 2nd Exp PD 3rd Exp

PD 1st Exp

PD 1st Exp PD 2nd Exp PD 3rd Exp  
PD 2nd Exp  
PD 2nd Exp PD 3rd Exp  
PD 2nd Exp

PD 2nd Exp PD 3rd Exp  
PD 2nd Exp

PD 1st Exp

PD 2nd Exp  
PD 2nd Exp  
PD 2nd Exp

PD 1st Exp

PD 2nd Exp  
PD 2nd Exp  
PD 2nd Exp

PD 1st Exp

PD 1st Exp

PD 1st Exp

PD 2nd Exp  
PD 2nd Exp

PD 1st Exp PD 2nd Exp PD 3rd Exp  
PD 2nd Exp  
PD 2nd Exp  
PD 2nd Exp  
PD 1st Exp PD 2nd Exp  
PD 3rd Exp  
PD 1st Exp  
PD 1st Exp PD 2nd Exp PD 3rd Exp  
PD 1st Exp PD 2nd Exp  
PD 1st Exp PD 2nd Exp  
PD 1st Exp PD 2nd Exp PD 3rd Exp  
PD 2nd Exp PD 3rd Exp  
PD 1st Exp PD 2nd Exp  
PD 1st Exp PD 2nd Exp PD 3rd Exp  
PD 2nd Exp PD 3rd Exp  
PD 1st Exp PD 2nd Exp PD 3rd Exp  
PD 1st Exp PD 2nd Exp PD 3rd Exp  
PD 1st Exp PD 2nd Exp  
PD 1st Exp PD 2nd Exp PD 3rd Exp  
PD 1st Exp PD 2nd Exp PD 3rd Exp  
PD 2nd Exp PD 3rd Exp  
PD 1st Exp PD 2nd Exp  
PD 2nd Exp PD 3rd Exp  
PD 1st Exp PD 2nd Exp PD 3rd Exp  
PD 2nd Exp  
PD 2nd Exp  
PD 1st Exp

PD 1st Exp PD 2nd Exp  
PD 1st Exp PD 2nd Exp  
PD 1st Exp PD 2nd Exp  
PD 1st Exp PD 2nd Exp  
PD 1st Exp PD 2nd Exp  
PD 1st Exp PD 2nd Exp  
PD 1st Exp PD 2nd Exp

PD 1st Exp PD 2nd Exp  
PD 1st Exp PD 2nd Exp  
PD 1st Exp PD 2nd Exp  
PD 1st Exp PD 2nd Exp  
PD 1st Exp PD 2nd Exp  
PD 2nd Exp  
PD 2nd Exp  
PD 2nd Exp  
PD 2nd Exp

PD 1st Exp PD 3rd Exp  
PD 1st Exp PD 3rd Exp  
PD 1st Exp PD 3rd Exp  
PD 1st Exp PD 3rd Exp  
PD 1st Exp PD 3rd Exp  
PD 1st Exp PD 2nd Exp PD 3rd Exp  
PD 1st Exp PD 2nd Exp PD 3rd Exp  
PD 1st Exp PD 2nd Exp PD 3rd Exp  
PD 1st Exp PD 3rd Exp

|            |            |            |
|------------|------------|------------|
|            | PD 2nd Exp | PD 3rd Exp |
|            |            | PD 3rd Exp |
| PD 1st Exp | PD 2nd Exp | PD 3rd Exp |
|            |            | PD 3rd Exp |
| PD 1st Exp |            |            |
| PD 1st Exp |            |            |
| PD 1st Exp | PD 2nd Exp |            |
|            | PD 2nd Exp |            |
| PD 1st Exp | PD 2nd Exp |            |
| PD 1st Exp | PD 2nd Exp |            |
|            | PD 2nd Exp |            |
|            | PD 2nd Exp |            |
| PD 1st Exp | PD 2nd Exp | PD 3rd Exp |
|            | PD 2nd Exp |            |
| PD 1st Exp | PD 2nd Exp | PD 3rd Exp |
| PD 1st Exp | PD 2nd Exp | PD 3rd Exp |
| PD 1st Exp | PD 2nd Exp | PD 3rd Exp |
|            |            | PD 3rd Exp |
| PD 1st Exp | PD 2nd Exp | PD 3rd Exp |
|            | PD 2nd Exp |            |
| PD 1st Exp | PD 2nd Exp | PD 3rd Exp |
| PD 1st Exp | PD 2nd Exp | PD 3rd Exp |
| PD 1st Exp | PD 2nd Exp | PD 3rd Exp |

PD 1st Exp PD 2nd Exp PD 3rd Exp  
PD 1st Exp PD 2nd Exp PD 3rd Exp  
PD 1st Exp PD 2nd Exp PD 3rd Exp  
PD 2nd Exp  
PD 1st Exp PD 3rd Exp  
PD 2nd Exp PD 3rd Exp  
PD 2nd Exp  
PD 1st Exp PD 2nd Exp PD 3rd Exp  
PD 3rd Exp  
PD 2nd Exp  
PD 1st Exp  
PD 2nd Exp  
PD 2nd Exp PD 3rd Exp  
PD 2nd Exp  
PD 2nd Exp  
PD 2nd Exp PD 3rd Exp  
PD 2nd Exp PD 3rd Exp  
PD 2nd Exp  
PD 1st Exp PD 2nd Exp  
PD 1st Exp  
PD 2nd Exp  
PD 2nd Exp PD 3rd Exp  
PD 3rd Exp  
PD 2nd Exp  
PD 1st Exp PD 2nd Exp  
PD 2nd Exp  
PD 2nd Exp  
PD 2nd Exp  
PD 2nd Exp



PD 2nd Exp  
PD 2nd Exp PD 3rd Exp  
PD 2nd Exp  
PD 2nd Exp  
PD 1st Exp  
PD 1st Exp PD 2nd Exp  
PD 2nd Exp  
PD 1st Exp  
PD 2nd Exp  
PD 1st Exp PD 2nd Exp  
PD 2nd Exp  
PD 3rd Exp  
PD 2nd Exp PD 3rd Exp  
PD 2nd Exp PD 3rd Exp  
PD 2nd Exp PD 3rd Exp  
PD 2nd Exp PD 3rd Exp  
PD 3rd Exp  
PD 2nd Exp PD 3rd Exp  
PD 3rd Exp  
PD 2nd Exp PD 3rd Exp  
PD 2nd Exp PD 3rd Exp  
PD 2nd Exp PD 3rd Exp  
PD 3rd Exp  
PD 3rd Exp  
PD 3rd Exp  
PD 3rd Exp  
PD 1st Exp PD 2nd Exp PD 3rd Exp  
PD 2nd Exp  
PD 3rd Exp  
PD 1st Exp PD 2nd Exp  
PD 3rd Exp  
PD 1st Exp PD 2nd Exp PD 3rd Exp  
PD 1st Exp PD 3rd Exp  
PD 2nd Exp PD 3rd Exp  
PD 3rd Exp  
PD 1st Exp PD 3rd Exp  
PD 2nd Exp

PD 2nd Exp  
PD 2nd Exp PD 3rd Exp  
PD 3rd Exp  
PD 2nd Exp PD 3rd Exp  
PD 2nd Exp  
PD 2nd Exp  
PD 2nd Exp PD 3rd Exp  
PD 2nd Exp PD 3rd Exp  
PD 3rd Exp  
PD 2nd Exp  
PD 3rd Exp  
PD 3rd Exp  
PD 2nd Exp  
PD 2nd Exp PD 3rd Exp  
PD 3rd Exp  
PD 2nd Exp  
PD 2nd Exp PD 3rd Exp  
PD 2nd Exp PD 3rd Exp  
PD 2nd Exp PD 3rd Exp  
PD 1st Exp PD 2nd Exp PD 3rd Exp  
PD 2nd Exp PD 3rd Exp  
PD 2nd Exp PD 3rd Exp  
PD 1st Exp PD 2nd Exp  
PD 1st Exp PD 2nd Exp  
PD 2nd Exp  
PD 1st Exp PD 2nd Exp  
PD 1st Exp PD 2nd Exp  
PD 1st Exp PD 2nd Exp  
PD 2nd Exp  
PD 2nd Exp  
PD 2nd Exp  
PD 1st Exp PD 2nd Exp  
PD 1st Exp  
PD 1st Exp  
PD 2nd Exp

|            |            |            |
|------------|------------|------------|
| PD 1st Exp | PD 2nd Exp |            |
|            | PD 2nd Exp |            |
| PD 1st Exp |            |            |
|            | PD 2nd Exp | PD 3rd Exp |
| PD 1st Exp |            | PD 3rd Exp |
| PD 1st Exp |            | PD 3rd Exp |
|            | PD 2nd Exp | PD 3rd Exp |
| PD 1st Exp | PD 2nd Exp | PD 3rd Exp |
| PD 1st Exp | PD 2nd Exp | PD 3rd Exp |
|            | PD 2nd Exp |            |
| PD 1st Exp | PD 2nd Exp |            |
| PD 1st Exp | PD 2nd Exp | PD 3rd Exp |
| PD 1st Exp | PD 2nd Exp |            |
|            | PD 2nd Exp |            |
| PD 1st Exp | PD 2nd Exp |            |
|            | PD 2nd Exp |            |
| PD 1st Exp | PD 2nd Exp |            |
| PD 1st Exp | PD 2nd Exp |            |
|            | PD 2nd Exp | PD 3rd Exp |
| PD 1st Exp | PD 2nd Exp | PD 3rd Exp |
|            | PD 2nd Exp |            |
|            | PD 2nd Exp |            |
|            | PD 2nd Exp |            |
|            | PD 2nd Exp | PD 3rd Exp |
|            | PD 2nd Exp |            |
| PD 1st Exp | PD 2nd Exp | PD 3rd Exp |
|            | PD 2nd Exp |            |
| PD 1st Exp | PD 2nd Exp | PD 3rd Exp |
|            | PD 2nd Exp |            |
|            | PD 2nd Exp |            |
|            | PD 2nd Exp |            |
|            | PD 2nd Exp | PD 3rd Exp |
| PD 1st Exp | PD 2nd Exp |            |

PD 2nd Exp PD 3rd Exp

PD 1st Exp PD 2nd Exp PD 3rd Exp

PD 1st Exp PD 2nd Exp  
PD 2nd Exp  
PD 2nd Exp PD 3rd Exp  
PD 2nd Exp PD 3rd Exp  
PD 3rd Exp

PD 1st Exp PD 2nd Exp PD 3rd Exp

PD 1st Exp PD 2nd Exp PD 3rd Exp

PD 1st Exp PD 3rd Exp

PD 1st Exp PD 2nd Exp PD 3rd Exp

PD 1st Exp PD 3rd Exp

PD 1st Exp PD 2nd Exp PD 3rd Exp

PD 1st Exp PD 2nd Exp PD 3rd Exp

PD 1st Exp PD 2nd Exp PD 3rd Exp

PD 1st Exp PD 3rd Exp

PD 1st Exp PD 2nd Exp PD 3rd Exp

PD 1st Exp PD 2nd Exp PD 3rd Exp

PD 1st Exp PD 2nd Exp PD 3rd Exp

PD 1st Exp PD 2nd Exp PD 3rd Exp

PD 1st Exp PD 2nd Exp

PD 1st Exp PD 2nd Exp PD 3rd Exp

PD 1st Exp PD 3rd Exp

PD 1st Exp PD 2nd Exp PD 3rd Exp

PD 1st Exp PD 3rd Exp

PD 1st Exp PD 2nd Exp PD 3rd Exp

PD 3rd Exp

PD 1st Exp PD 3rd Exp

PD 2nd Exp PD 3rd Exp

PD 3rd Exp

PD 3rd Exp

PD 1st Exp PD 2nd Exp PD 3rd Exp

|            |            |            |
|------------|------------|------------|
| PD 1st Exp | PD 2nd Exp | PD 3rd Exp |
|            |            | PD 3rd Exp |
|            |            | PD 3rd Exp |
|            |            | PD 3rd Exp |
| PD 1st Exp |            | PD 3rd Exp |
|            |            | PD 3rd Exp |

|            |            |            |
|------------|------------|------------|
| PD 1st Exp | PD 2nd Exp | PD 3rd Exp |
| PD 1st Exp | v          | PD 3rd Exp |
| PD 1st Exp |            |            |
|            | PD 2nd Exp | PD 3rd Exp |

|            |            |            |
|------------|------------|------------|
| PD 1st Exp |            |            |
| PD 1st Exp |            |            |
| PD 1st Exp | PD 2nd Exp |            |
| PD 1st Exp |            |            |
| PD 1st Exp |            |            |
| PD 1st Exp | PD 2nd Exp |            |
|            | PD 2nd Exp |            |
|            | PD 2nd Exp |            |
| PD 1st Exp | PD 2nd Exp |            |
|            | PD 2nd Exp |            |
|            | PD 2nd Exp |            |
|            | PD 2nd Exp | PD 3rd Exp |
|            | PD 2nd Exp |            |

|            |            |            |
|------------|------------|------------|
| PD 1st Exp | PD 2nd Exp |            |
| PD 1st Exp | PD 2nd Exp | PD 3rd Exp |
| PD 1st Exp | PD 2nd Exp | PD 3rd Exp |
| PD 1st Exp | PD 2nd Exp | PD 3rd Exp |
|            | PD 2nd Exp | PD 3rd Exp |
|            | PD 2nd Exp | PD 3rd Exp |
|            |            | PD 3rd Exp |
|            |            | PD 3rd Exp |
|            | PD 2nd Exp |            |
|            | PD 2nd Exp |            |

|            |            |            |
|------------|------------|------------|
| PD 1st Exp | PD 2nd Exp | PD 3rd Exp |
| PD 1st Exp | PD 2nd Exp | PD 3rd Exp |
|            |            | PD 3rd Exp |

PD 1st Exp

PD 1st Exp PD 2nd Exp PD 3rd Exp

PD 1st Exp PD 2nd Exp PD 3rd Exp

PD 1st Exp PD 2nd Exp PD 3rd Exp

PD 1st Exp PD 2nd Exp PD 3rd Exp

PD 1st Exp PD 3rd Exp

PD 3rd Exp

PD 1st Exp PD 2nd Exp PD 3rd Exp

PD 1st Exp PD 2nd Exp PD 3rd Exp

PD 1st Exp

PD 1st Exp PD 2nd Exp PD 3rd Exp

PD 1st Exp

PD 2nd Exp PD 3rd Exp

PD 2nd Exp PD 3rd Exp

PD 2nd Exp

PD 1st Exp PD 2nd Exp PD 3rd Exp

PD 2nd Exp

PD 2nd Exp

PD 1st Exp PD 2nd Exp

PD 2nd Exp

PD 2nd Exp

PD 2nd Exp

PD 1st Exp PD 2nd Exp PD 3rd Exp

PD 1st Exp PD 2nd Exp PD 3rd Exp

PD 2nd Exp

PD 2nd Exp

PD 2nd Exp

PD 1st Exp

PD 1st Exp PD 2nd Exp

PD 2nd Exp

PD 1st Exp PD 2nd Exp PD 3rd Exp

PD 2nd Exp PD 3rd Exp

PD 2nd Exp

PD 2nd Exp PD 3rd Exp

PD 2nd Exp

PD 2nd Exp

PD 2nd Exp



PD 2nd Exp  
PD 2nd Exp PD 3rd Exp  
PD 2nd Exp PD 3rd Exp  
PD 2nd Exp  
PD 2nd Exp  
PD 2nd Exp  
PD 1st Exp PD 2nd Exp PD 3rd Exp  
PD 2nd Exp  
PD 1st Exp PD 2nd Exp  
PD 2nd Exp  
PD 2nd Exp  
PD 2nd Exp  
PD 1st Exp PD 2nd Exp  
PD 2nd Exp  
PD 1st Exp PD 2nd Exp  
PD 2nd Exp  
PD 1st Exp PD 2nd Exp  
PD 2nd Exp  
PD 3rd Exp  
PD 2nd Exp  
PD 1st Exp  
PD 2nd Exp  
PD 2nd Exp PD 3rd Exp  
PD 2nd Exp  
PD 3rd Exp  
PD 1st Exp PD 3rd Exp  
PD 3rd Exp  
PD 2nd Exp PD 3rd Exp  
PD 2nd Exp PD 3rd Exp  
PD 2nd Exp PD 3rd Exp  
PD 1st Exp PD 3rd Exp  
PD 3rd Exp  
PD 3rd Exp  
PD 3rd Exp  
PD 2nd Exp PD 3rd Exp  
PD 1st Exp PD 3rd Exp  
PD 1st Exp PD 2nd Exp PD 3rd Exp



|            |            |            |
|------------|------------|------------|
|            |            | PD 3rd Exp |
|            |            | PD 3rd Exp |
| PD 1st Exp | PD 2nd Exp | PD 3rd Exp |
|            | PD 2nd Exp | PD 3rd Exp |
| PD 1st Exp | PD 2nd Exp | PD 3rd Exp |
|            | PD 2nd Exp |            |
|            | PD 2nd Exp | PD 3rd Exp |
|            | PD 2nd Exp |            |
|            | PD 2nd Exp | PD 3rd Exp |
| PD 1st Exp | PD 2nd Exp | PD 3rd Exp |
|            | PD 2nd Exp | PD 3rd Exp |
| PD 1st Exp | PD 2nd Exp | PD 3rd Exp |
|            |            | PD 3rd Exp |
|            |            | PD 3rd Exp |
|            | PD 2nd Exp | PD 3rd Exp |
|            |            | PD 3rd Exp |
|            | PD 2nd Exp | PD 3rd Exp |
| PD 1st Exp | PD 2nd Exp | PD 3rd Exp |
|            | PD 2nd Exp | PD 3rd Exp |
|            | PD 2nd Exp | PD 3rd Exp |
|            | PD 2nd Exp | PD 3rd Exp |
| PD 1st Exp | PD 2nd Exp | PD 3rd Exp |
| PD 1st Exp | PD 2nd Exp | PD 3rd Exp |
|            | PD 2nd Exp | PD 3rd Exp |
|            | PD 2nd Exp | PD 3rd Exp |
|            | PD 2nd Exp | PD 3rd Exp |
|            | PD 2nd Exp | PD 3rd Exp |
| PD 1st Exp | PD 2nd Exp | PD 3rd Exp |
|            | PD 2nd Exp |            |
|            | PD 2nd Exp |            |
|            |            | PD 3rd Exp |
| PD 1st Exp | PD 2nd Exp | PD 3rd Exp |
|            | PD 2nd Exp | PD 3rd Exp |
|            | PD 2nd Exp | PD 3rd Exp |

|            |            |            |
|------------|------------|------------|
|            | PD 2nd Exp | PD 3rd Exp |
|            |            | PD 3rd Exp |
|            | PD 2nd Exp | PD 3rd Exp |
|            | PD 2nd Exp |            |
| PD 1st Exp | PD 2nd Exp | PD 3rd Exp |
|            | PD 2nd Exp | PD 3rd Exp |
| PD 1st Exp | PD 2nd Exp | PD 3rd Exp |
|            |            | PD 3rd Exp |
| PD 1st Exp | PD 2nd Exp | PD 3rd Exp |
|            | PD 2nd Exp | PD 3rd Exp |
|            |            | PD 3rd Exp |
|            | PD 2nd Exp | PD 3rd Exp |
| PD 1st Exp | PD 2nd Exp | PD 3rd Exp |
|            | PD 2nd Exp | PD 3rd Exp |
|            | PD 2nd Exp | PD 3rd Exp |
|            |            | PD 3rd Exp |
|            | PD 2nd Exp | PD 3rd Exp |
|            | PD 2nd Exp | PD 3rd Exp |
| PD 1st Exp | PD 2nd Exp | PD 3rd Exp |
|            | PD 2nd Exp | PD 3rd Exp |
|            |            | PD 3rd Exp |
|            | PD 2nd Exp | PD 3rd Exp |
| PD 1st Exp | PD 2nd Exp | PD 3rd Exp |
| PD 1st Exp | PD 2nd Exp | PD 3rd Exp |
|            |            | PD 3rd Exp |
|            | PD 2nd Exp | PD 3rd Exp |
|            | PD 2nd Exp | PD 3rd Exp |
|            |            | PD 3rd Exp |
|            | PD 2nd Exp | PD 3rd Exp |
| PD 1st Exp |            |            |
|            | PD 2nd Exp |            |
|            |            | PD 3rd Exp |
| PD 1st Exp | PD 2nd Exp | PD 3rd Exp |
| PD 1st Exp | PD 2nd Exp | PD 3rd Exp |
|            | PD 2nd Exp | PD 3rd Exp |

|            |            |            |
|------------|------------|------------|
|            | PD 2nd Exp | PD 3rd Exp |
|            | PD 2nd Exp | PD 3rd Exp |
|            | PD 2nd Exp | PD 3rd Exp |
|            | PD 2nd Exp | PD 3rd Exp |
| PD 1st Exp | PD 2nd Exp | PD 3rd Exp |
| PD 1st Exp | PD 2nd Exp | PD 3rd Exp |
| PD 1st Exp | PD 2nd Exp | PD 3rd Exp |
|            | PD 2nd Exp | PD 3rd Exp |
| PD 1st Exp | PD 2nd Exp | PD 3rd Exp |
|            |            | PD 3rd Exp |
|            | PD 2nd Exp |            |
|            | PD 2nd Exp |            |
|            | PD 2nd Exp |            |
| PD 1st Exp | PD 2nd Exp | PD 3rd Exp |
| PD 1st Exp | PD 2nd Exp | PD 3rd Exp |
|            |            | PD 3rd Exp |
|            |            | PD 3rd Exp |
|            | PD 2nd Exp | PD 3rd Exp |
|            |            | PD 3rd Exp |
| PD 1st Exp |            | PD 3rd Exp |
|            | PD 2nd Exp | PD 3rd Exp |
|            |            | PD 3rd Exp |
|            | PD 2nd Exp | PD 3rd Exp |
|            |            | PD 3rd Exp |
|            | PD 2nd Exp | PD 3rd Exp |
|            | PD 2nd Exp |            |
| PD 1st Exp | PD 2nd Exp | PD 3rd Exp |
|            |            | PD 3rd Exp |
|            |            | PD 3rd Exp |
| PD 1st Exp | PD 2nd Exp | PD 3rd Exp |
|            | PD 2nd Exp | PD 3rd Exp |
|            | PD 2nd Exp | PD 3rd Exp |
|            |            | PD 3rd Exp |
| PD 1st Exp | PD 2nd Exp | PD 3rd Exp |
|            | PD 2nd Exp | PD 3rd Exp |
|            | PD 2nd Exp | PD 3rd Exp |
|            |            | PD 3rd Exp |

PD 1st Exp

PD 2nd Exp PD 3rd Exp

PD 2nd Exp

PD 2nd Exp PD 3rd Exp

PD 2nd Exp PD 3rd Exp

PD 2nd Exp PD 3rd Exp

PD 2nd Exp

PD 2nd Exp PD 3rd Exp

PD 2nd Exp PD 3rd Exp

PD 1st Exp

PD 2nd Exp PD 3rd Exp

PD 2nd Exp PD 3rd Exp

PD 2nd Exp PD 3rd Exp

PD 3rd Exp

PD 2nd Exp PD 3rd Exp

PD 2nd Exp PD 3rd Exp

PD 2nd Exp PD 3rd Exp

PD 3rd Exp

PD 3rd Exp

PD 2nd Exp PD 3rd Exp

PD 3rd Exp

PD 2nd Exp PD 3rd Exp

PD 3rd Exp

PD 1st Exp

PD 2nd Exp PD 3rd Exp

PD 1st Exp

PD 2nd Exp PD 3rd Exp

PD 3rd Exp

PD 3rd Exp

PD 3rd Exp

PD 1st Exp

PD 3rd Exp

PD 1st Exp

PD 2nd Exp PD 3rd Exp

PD 2nd Exp PD 3rd Exp

PD 3rd Exp

|            |            |            |
|------------|------------|------------|
|            |            | PD 3rd Exp |
| PD 1st Exp | PD 2nd Exp | PD 3rd Exp |
|            |            | PD 3rd Exp |
| PD 1st Exp |            | PD 3rd Exp |
|            |            | PD 3rd Exp |
| PD 1st Exp |            | PD 3rd Exp |
| PD 1st Exp | PD 2nd Exp | PD 3rd Exp |
|            | PD 2nd Exp | PD 3rd Exp |
|            | PD 2nd Exp | PD 3rd Exp |
| PD 1st Exp | PD 2nd Exp | PD 3rd Exp |
|            |            | PD 3rd Exp |
|            | PD 2nd Exp | PD 3rd Exp |
|            |            | PD 3rd Exp |
|            |            | PD 3rd Exp |
|            | PD 2nd Exp | PD 3rd Exp |
|            | PD 2nd Exp | PD 3rd Exp |
|            |            | PD 3rd Exp |
| PD 1st Exp | PD 2nd Exp | PD 3rd Exp |
| PD 1st Exp |            | PD 3rd Exp |
|            |            | PD 3rd Exp |
|            |            | PD 3rd Exp |
| PD 1st Exp | PD 2nd Exp | PD 3rd Exp |
| PD 1st Exp | PD 2nd Exp | PD 3rd Exp |
|            | PD 2nd Exp | PD 3rd Exp |
| PD 1st Exp | PD 2nd Exp | PD 3rd Exp |
| PD 1st Exp |            | PD 3rd Exp |
|            |            | PD 3rd Exp |
| PD 1st Exp | PD 2nd Exp | PD 3rd Exp |
|            |            | PD 3rd Exp |
|            |            | PD 3rd Exp |
|            |            | PD 3rd Exp |
| PD 1st Exp | PD 2nd Exp | PD 3rd Exp |



|            |            |            |
|------------|------------|------------|
|            | PD 2nd Exp | PD 3rd Exp |
| PD 1st Exp | PD 2nd Exp | PD 3rd Exp |
| PD 1st Exp | PD 2nd Exp | PD 3rd Exp |
| PD 1st Exp | PD 2nd Exp | PD 3rd Exp |
|            | PD 2nd Exp |            |
|            | PD 2nd Exp | PD 3rd Exp |
| PD 1st Exp | PD 2nd Exp | PD 3rd Exp |
| PD 1st Exp | PD 2nd Exp | PD 3rd Exp |
| PD 1st Exp | PD 2nd Exp | PD 3rd Exp |
| PD 1st Exp | PD 2nd Exp | PD 3rd Exp |
| PD 1st Exp | PD 2nd Exp | PD 3rd Exp |
|            | PD 2nd Exp |            |
|            | PD 2nd Exp |            |
|            | PD 2nd Exp |            |
| PD 1st Exp | PD 2nd Exp | PD 3rd Exp |
|            | PD 2nd Exp |            |
|            | PD 2nd Exp | PD 3rd Exp |
|            | PD 2nd Exp |            |
| PD 1st Exp | PD 2nd Exp | PD 3rd Exp |
| PD 1st Exp | PD 2nd Exp | PD 3rd Exp |
| PD 1st Exp | PD 2nd Exp | PD 3rd Exp |
| PD 1st Exp | PD 2nd Exp | PD 3rd Exp |
|            | PD 2nd Exp |            |
| PD 1st Exp | PD 2nd Exp | PD 3rd Exp |
| PD 1st Exp | PD 2nd Exp | PD 3rd Exp |
| PD 1st Exp | PD 2nd Exp | PD 3rd Exp |
| PD 1st Exp | PD 2nd Exp | PD 3rd Exp |
| PD 1st Exp | PD 2nd Exp | PD 3rd Exp |
|            | PD 2nd Exp |            |
| PD 1st Exp | PD 2nd Exp | PD 3rd Exp |
| PD 1st Exp | PD 2nd Exp | PD 3rd Exp |
| PD 1st Exp | PD 2nd Exp | PD 3rd Exp |
| PD 1st Exp | PD 2nd Exp | PD 3rd Exp |
| PD 1st Exp | PD 2nd Exp | PD 3rd Exp |
|            | PD 2nd Exp | PD 3rd Exp |
| PD 1st Exp | PD 2nd Exp | PD 3rd Exp |

|            |            |            |
|------------|------------|------------|
|            | PD 2nd Exp | PD 3rd Exp |
| PD 1st Exp | PD 2nd Exp | PD 3rd Exp |
|            |            | PD 3rd Exp |
| PD 1st Exp | PD 2nd Exp | PD 3rd Exp |
|            | PD 2nd Exp |            |
| PD 1st Exp | PD 2nd Exp | PD 3rd Exp |
| PD 1st Exp | PD 2nd Exp | PD 3rd Exp |
| PD 1st Exp | PD 2nd Exp | PD 3rd Exp |
| PD 1st Exp | PD 2nd Exp | PD 3rd Exp |
|            | PD 2nd Exp | PD 3rd Exp |
| PD 1st Exp | PD 2nd Exp | PD 3rd Exp |
| PD 1st Exp | PD 2nd Exp | PD 3rd Exp |
| PD 1st Exp | PD 2nd Exp | PD 3rd Exp |
|            | PD 2nd Exp | PD 3rd Exp |
| PD 1st Exp | PD 2nd Exp | PD 3rd Exp |
|            | PD 2nd Exp |            |
| PD 1st Exp | PD 2nd Exp | PD 3rd Exp |
| PD 1st Exp | PD 2nd Exp | PD 3rd Exp |
| PD 1st Exp | PD 2nd Exp | PD 3rd Exp |
|            |            | PD 3rd Exp |
| PD 1st Exp | PD 2nd Exp | PD 3rd Exp |
|            |            | PD 3rd Exp |
| PD 1st Exp | PD 2nd Exp | PD 3rd Exp |
| PD 1st Exp | PD 2nd Exp | PD 3rd Exp |
| PD 1st Exp | PD 2nd Exp |            |
|            | PD 2nd Exp |            |
|            | PD 2nd Exp |            |
| PD 1st Exp | PD 2nd Exp | PD 3rd Exp |
| PD 1st Exp | PD 2nd Exp | PD 3rd Exp |
| PD 1st Exp | PD 2nd Exp | PD 3rd Exp |
|            | PD 2nd Exp | PD 3rd Exp |
|            |            | PD 3rd Exp |
| PD 1st Exp | PD 2nd Exp | PD 3rd Exp |
| PD 1st Exp |            | PD 3rd Exp |
| PD 1st Exp |            | PD 3rd Exp |



|            |            |            |
|------------|------------|------------|
|            | PD 2nd Exp | PD 3rd Exp |
| PD 1st Exp |            | PD 3rd Exp |
| PD 1st Exp | PD 2nd Exp | PD 3rd Exp |
| PD 1st Exp | PD 2nd Exp | PD 3rd Exp |
| PD 1st Exp | PD 2nd Exp | PD 3rd Exp |
| PD 1st Exp | PD 2nd Exp | PD 3rd Exp |
| PD 1st Exp | PD 2nd Exp | PD 3rd Exp |
|            | PD 2nd Exp | PD 3rd Exp |
| PD 1st Exp | PD 2nd Exp | PD 3rd Exp |
|            |            | PD 3rd Exp |
| PD 1st Exp |            | PD 3rd Exp |
|            | PD 2nd Exp | PD 3rd Exp |
| PD 1st Exp | PD 2nd Exp | PD 3rd Exp |
| PD 1st Exp | PD 2nd Exp | PD 3rd Exp |
| PD 1st Exp |            | PD 3rd Exp |
| PD 1st Exp | PD 2nd Exp | PD 3rd Exp |
|            |            | PD 3rd Exp |
| PD 1st Exp | PD 2nd Exp | PD 3rd Exp |
| PD 1st Exp | PD 2nd Exp | PD 3rd Exp |
|            |            | PD 3rd Exp |
|            |            | PD 3rd Exp |
| PD 1st Exp | PD 2nd Exp | PD 3rd Exp |
| PD 1st Exp | PD 2nd Exp | PD 3rd Exp |
| PD 1st Exp | PD 2nd Exp | PD 3rd Exp |
| PD 1st Exp | PD 2nd Exp | PD 3rd Exp |
|            | PD 2nd Exp | PD 3rd Exp |
| PD 1st Exp | PD 2nd Exp | PD 3rd Exp |
| PD 1st Exp | PD 2nd Exp | PD 3rd Exp |
| PD 1st Exp | PD 2nd Exp | PD 3rd Exp |
|            |            | PD 3rd Exp |
|            |            | PD 3rd Exp |
|            |            | PD 3rd Exp |
| PD 1st Exp | PD 2nd Exp | PD 3rd Exp |
| PD 1st Exp | PD 2nd Exp | PD 3rd Exp |
| PD 1st Exp | PD 2nd Exp | PD 3rd Exp |

|            |            |            |
|------------|------------|------------|
|            |            | PD 3rd Exp |
|            |            | PD 3rd Exp |
|            |            | PD 3rd Exp |
|            | PD 2nd Exp | PD 3rd Exp |
| PD 1st Exp | PD 2nd Exp | PD 3rd Exp |
| PD 1st Exp | PD 2nd Exp | PD 3rd Exp |
| PD 1st Exp | PD 2nd Exp | PD 3rd Exp |
| PD 1st Exp |            | PD 3rd Exp |
| PD 1st Exp | PD 2nd Exp | PD 3rd Exp |
| PD 1st Exp |            | PD 3rd Exp |
| PD 1st Exp | PD 2nd Exp | PD 3rd Exp |
| PD 1st Exp | PD 2nd Exp | PD 3rd Exp |
| PD 1st Exp |            | PD 3rd Exp |
| PD 1st Exp | PD 2nd Exp | PD 3rd Exp |
| PD 1st Exp | PD 2nd Exp | PD 3rd Exp |
|            |            | PD 3rd Exp |
|            |            | PD 3rd Exp |
|            |            | PD 3rd Exp |
| PD 1st Exp | PD 2nd Exp | PD 3rd Exp |
| PD 1st Exp |            |            |
|            |            | PD 3rd Exp |
|            |            | PD 3rd Exp |
| PD 1st Exp | PD 2nd Exp | PD 3rd Exp |
| PD 1st Exp | PD 2nd Exp | PD 3rd Exp |
|            |            | PD 3rd Exp |
|            | PD 2nd Exp | PD 3rd Exp |
| PD 1st Exp | PD 2nd Exp | PD 3rd Exp |
| PD 1st Exp | PD 2nd Exp |            |
| PD 1st Exp | PD 2nd Exp | PD 3rd Exp |
| PD 1st Exp |            | PD 3rd Exp |
| PD 1st Exp | PD 2nd Exp | PD 3rd Exp |
| PD 1st Exp | PD 2nd Exp | PD 3rd Exp |
| PD 1st Exp | PD 2nd Exp | PD 3rd Exp |
| PD 1st Exp | PD 2nd Exp | PD 3rd Exp |
|            | PD 2nd Exp | PD 3rd Exp |
|            | PD 2nd Exp | PD 3rd Exp |
| PD 1st Exp | PD 2nd Exp | PD 3rd Exp |

|            |            |            |
|------------|------------|------------|
| PD 1st Exp | PD 2nd Exp | PD 3rd Exp |
|            | PD 2nd Exp | PD 3rd Exp |
| PD 1st Exp | PD 2nd Exp | PD 3rd Exp |
|            |            | PD 3rd Exp |
| PD 1st Exp | PD 2nd Exp | PD 3rd Exp |
| PD 1st Exp | PD 2nd Exp | PD 3rd Exp |
| PD 1st Exp | PD 2nd Exp | PD 3rd Exp |
| PD 1st Exp | PD 2nd Exp | PD 3rd Exp |
|            | PD 2nd Exp | PD 3rd Exp |
| PD 1st Exp | PD 2nd Exp | PD 3rd Exp |
| PD 1st Exp | PD 2nd Exp | PD 3rd Exp |
| PD 1st Exp | PD 2nd Exp | PD 3rd Exp |
|            | PD 2nd Exp | PD 3rd Exp |
| PD 1st Exp | PD 2nd Exp | PD 3rd Exp |
| PD 1st Exp | PD 2nd Exp | PD 3rd Exp |
| PD 1st Exp |            |            |
|            | PD 2nd Exp | PD 3rd Exp |
|            |            | PD 3rd Exp |
|            | PD 2nd Exp |            |
|            | PD 2nd Exp |            |
| PD 1st Exp | PD 2nd Exp | PD 3rd Exp |
| PD 1st Exp |            |            |
|            | PD 2nd Exp | PD 3rd Exp |
| PD 1st Exp | PD 2nd Exp | PD 3rd Exp |
| PD 1st Exp | PD 2nd Exp | PD 3rd Exp |
|            | PD 2nd Exp | PD 3rd Exp |
|            | PD 2nd Exp | PD 3rd Exp |
|            | PD 2nd Exp | PD 3rd Exp |
|            | PD 2nd Exp | PD 3rd Exp |
| PD 1st Exp | PD 2nd Exp | PD 3rd Exp |
|            | PD 2nd Exp | PD 3rd Exp |
| PD 1st Exp | PD 2nd Exp | PD 3rd Exp |
|            | PD 2nd Exp | PD 3rd Exp |
| PD 1st Exp | PD 2nd Exp | PD 3rd Exp |
| PD 1st Exp | PD 2nd Exp |            |
| PD 1st Exp | PD 2nd Exp | PD 3rd Exp |

|            |            |            |
|------------|------------|------------|
|            |            | PD 3rd Exp |
| PD 1st Exp | PD 2nd Exp | PD 3rd Exp |
| PD 1st Exp | PD 2nd Exp | PD 3rd Exp |
| PD 1st Exp | PD 2nd Exp | PD 3rd Exp |
| PD 1st Exp |            | PD 3rd Exp |
|            | PD 2nd Exp | PD 3rd Exp |
|            |            | PD 3rd Exp |
|            |            | PD 3rd Exp |
| PD 1st Exp | PD 2nd Exp | PD 3rd Exp |
| PD 1st Exp | PD 2nd Exp | PD 3rd Exp |
| PD 1st Exp | PD 2nd Exp | PD 3rd Exp |
|            | PD 2nd Exp | PD 3rd Exp |
| PD 1st Exp | PD 2nd Exp | PD 3rd Exp |
| PD 1st Exp | PD 2nd Exp | PD 3rd Exp |
| PD 1st Exp | PD 2nd Exp | PD 3rd Exp |
|            | PD 2nd Exp | PD 3rd Exp |
| PD 1st Exp | PD 2nd Exp | PD 3rd Exp |
|            |            | PD 3rd Exp |
| PD 1st Exp | PD 2nd Exp | PD 3rd Exp |
| PD 1st Exp | PD 2nd Exp | PD 3rd Exp |
|            | PD 2nd Exp | PD 3rd Exp |
| PD 1st Exp | PD 2nd Exp | PD 3rd Exp |
| PD 1st Exp | PD 2nd Exp | PD 3rd Exp |
|            | PD 2nd Exp | PD 3rd Exp |
| PD 1st Exp | PD 2nd Exp | PD 3rd Exp |
|            |            | PD 3rd Exp |
| PD 1st Exp | PD 2nd Exp | PD 3rd Exp |
|            | PD 2nd Exp | PD 3rd Exp |
| PD 1st Exp | PD 2nd Exp | PD 3rd Exp |
| PD 1st Exp | PD 2nd Exp | PD 3rd Exp |
| PD 1st Exp | PD 2nd Exp | PD 3rd Exp |
| PD 1st Exp | PD 2nd Exp | PD 3rd Exp |
| PD 1st Exp | PD 2nd Exp | PD 3rd Exp |
| PD 1st Exp | PD 2nd Exp | PD 3rd Exp |
|            | PD 2nd Exp | PD 3rd Exp |
| PD 1st Exp | PD 2nd Exp | PD 3rd Exp |
|            | PD 2nd Exp |            |

PD 1st Exp PD 2nd Exp PD 3rd Exp  
PD 2nd Exp  
PD 1st Exp PD 2nd Exp PD 3rd Exp  
PD 1st Exp PD 2nd Exp PD 3rd Exp  
PD 1st Exp PD 2nd Exp PD 3rd Exp  
PD 1st Exp PD 2nd Exp PD 3rd Exp  
PD 2nd Exp PD 3rd Exp  
PD 1st Exp PD 2nd Exp PD 3rd Exp  
PD 1st Exp PD 2nd Exp PD 3rd Exp  
PD 1st Exp PD 2nd Exp PD 3rd Exp  
PD 2nd Exp PD 3rd Exp  
PD 1st Exp PD 2nd Exp PD 3rd Exp  
PD 1st Exp PD 2nd Exp PD 3rd Exp  
PD 1st Exp PD 2nd Exp PD 3rd Exp  
PD 2nd Exp PD 3rd Exp  
PD 1st Exp PD 2nd Exp PD 3rd Exp  
PD 1st Exp PD 2nd Exp PD 3rd Exp  
PD 1st Exp PD 2nd Exp PD 3rd Exp  
PD 2nd Exp PD 3rd Exp  
PD 1st Exp PD 2nd Exp PD 3rd Exp  
PD 1st Exp PD 2nd Exp PD 3rd Exp  
PD 1st Exp PD 2nd Exp PD 3rd Exp  
PD 2nd Exp PD 3rd Exp  
PD 1st Exp PD 2nd Exp PD 3rd Exp  
PD 2nd Exp PD 3rd Exp  
PD 1st Exp PD 2nd Exp PD 3rd Exp  
PD 2nd Exp PD 3rd Exp  
PD 1st Exp PD 2nd Exp PD 3rd Exp  
PD 2nd Exp PD 3rd Exp

|            |            |            |
|------------|------------|------------|
| PD 1st Exp | PD 2nd Exp | PD 3rd Exp |
| PD 1st Exp | PD 2nd Exp | PD 3rd Exp |
|            |            | PD 3rd Exp |
| PD 1st Exp | PD 2nd Exp | PD 3rd Exp |
|            | PD 2nd Exp |            |
|            |            | PD 3rd Exp |
|            | PD 2nd Exp |            |
| PD 1st Exp | PD 2nd Exp | PD 3rd Exp |
| PD 1st Exp | PD 2nd Exp | PD 3rd Exp |
| PD 1st Exp | PD 2nd Exp | PD 3rd Exp |
|            | PD 2nd Exp | PD 3rd Exp |
| PD 1st Exp | PD 2nd Exp | PD 3rd Exp |
| PD 1st Exp | PD 2nd Exp | PD 3rd Exp |
|            | PD 2nd Exp | PD 3rd Exp |
| PD 1st Exp | PD 2nd Exp | PD 3rd Exp |
|            |            | PD 3rd Exp |
|            | PD 2nd Exp | PD 3rd Exp |
| PD 1st Exp |            | PD 3rd Exp |
| PD 1st Exp | PD 2nd Exp | PD 3rd Exp |
| PD 1st Exp | PD 2nd Exp | PD 3rd Exp |
|            | PD 2nd Exp | PD 3rd Exp |
| PD 1st Exp | PD 2nd Exp | PD 3rd Exp |
|            |            | PD 3rd Exp |
|            | PD 2nd Exp | PD 3rd Exp |
| PD 1st Exp | PD 2nd Exp | PD 3rd Exp |
| PD 1st Exp | PD 2nd Exp | PD 3rd Exp |
| PD 1st Exp | PD 2nd Exp | PD 3rd Exp |
|            |            | PD 3rd Exp |
| PD 1st Exp | PD 2nd Exp | PD 3rd Exp |
|            | PD 2nd Exp | PD 3rd Exp |
|            |            | PD 3rd Exp |
| PD 1st Exp | PD 2nd Exp | PD 3rd Exp |
|            | PD 2nd Exp |            |
| PD 1st Exp | PD 2nd Exp | PD 3rd Exp |
| PD 1st Exp | PD 2nd Exp | PD 3rd Exp |
| PD 1st Exp | PD 2nd Exp | PD 3rd Exp |
| PD 1st Exp | PD 2nd Exp | PD 3rd Exp |

|            |            |            |
|------------|------------|------------|
|            |            | PD 3rd Exp |
|            | PD 2nd Exp | PD 3rd Exp |
| PD 1st Exp | PD 2nd Exp | PD 3rd Exp |
|            | PD 2nd Exp | PD 3rd Exp |
|            | PD 2nd Exp | PD 3rd Exp |
| PD 1st Exp | PD 2nd Exp | PD 3rd Exp |
|            |            | PD 3rd Exp |
| PD 1st Exp | PD 2nd Exp | PD 3rd Exp |
|            |            | PD 3rd Exp |
| PD 1st Exp | PD 2nd Exp | PD 3rd Exp |
|            |            | PD 3rd Exp |
| PD 1st Exp |            | PD 3rd Exp |
| PD 1st Exp | PD 2nd Exp | PD 3rd Exp |
| PD 1st Exp | PD 2nd Exp | PD 3rd Exp |
|            | PD 2nd Exp | PD 3rd Exp |
|            | PD 2nd Exp | PD 3rd Exp |
|            | PD 2nd Exp |            |
| PD 1st Exp | PD 2nd Exp | PD 3rd Exp |
| PD 1st Exp | PD 2nd Exp | PD 3rd Exp |
|            |            | PD 3rd Exp |
| PD 1st Exp | PD 2nd Exp | PD 3rd Exp |
| PD 1st Exp | PD 2nd Exp | PD 3rd Exp |
|            | PD 2nd Exp | PD 3rd Exp |
|            | PD 2nd Exp | PD 3rd Exp |
| PD 1st Exp | PD 2nd Exp | PD 3rd Exp |
|            |            | PD 3rd Exp |
| PD 1st Exp | PD 2nd Exp | PD 3rd Exp |
| PD 1st Exp |            | PD 3rd Exp |
| PD 1st Exp | PD 2nd Exp | PD 3rd Exp |
| PD 1st Exp | PD 2nd Exp | PD 3rd Exp |
| PD 1st Exp | PD 2nd Exp | PD 3rd Exp |
| PD 1st Exp | PD 2nd Exp | PD 3rd Exp |
|            | PD 2nd Exp | PD 3rd Exp |
| PD 1st Exp | PD 2nd Exp | PD 3rd Exp |
| PD 1st Exp | PD 2nd Exp | PD 3rd Exp |

|            |            |            |
|------------|------------|------------|
|            | PD 2nd Exp | PD 3rd Exp |
| PD 1st Exp | PD 2nd Exp | PD 3rd Exp |
|            | PD 2nd Exp | PD 3rd Exp |
|            | PD 2nd Exp | PD 3rd Exp |
| PD 1st Exp | PD 2nd Exp | PD 3rd Exp |
|            | PD 2nd Exp | PD 3rd Exp |
| PD 1st Exp |            | PD 3rd Exp |
| PD 1st Exp | PD 2nd Exp | PD 3rd Exp |
|            | PD 2nd Exp |            |
|            | PD 2nd Exp | PD 3rd Exp |
|            |            | PD 3rd Exp |
| PD 1st Exp | PD 2nd Exp | PD 3rd Exp |
|            | PD 2nd Exp | PD 3rd Exp |
|            | PD 2nd Exp | PD 3rd Exp |
|            | PD 2nd Exp | PD 3rd Exp |
|            | PD 2nd Exp | PD 3rd Exp |
|            | PD 2nd Exp | PD 3rd Exp |
| PD 1st Exp | PD 2nd Exp | PD 3rd Exp |
|            |            | PD 3rd Exp |
| PD 1st Exp | PD 2nd Exp | PD 3rd Exp |
| PD 1st Exp | PD 2nd Exp | PD 3rd Exp |
| PD 1st Exp | PD 2nd Exp | PD 3rd Exp |
| PD 1st Exp | PD 2nd Exp | PD 3rd Exp |
|            | PD 2nd Exp | PD 3rd Exp |
| PD 1st Exp |            | PD 3rd Exp |
| PD 1st Exp | PD 2nd Exp | PD 3rd Exp |
| PD 1st Exp | PD 2nd Exp | PD 3rd Exp |
| PD 1st Exp | PD 2nd Exp | PD 3rd Exp |
|            | PD 2nd Exp |            |
| PD 1st Exp |            | PD 3rd Exp |
|            | PD 2nd Exp | PD 3rd Exp |
| PD 1st Exp | PD 2nd Exp | PD 3rd Exp |





|            |            |            |
|------------|------------|------------|
|            | PD 2nd Exp |            |
| PD 1st Exp | PD 2nd Exp |            |
|            | PD 2nd Exp | PD 3rd Exp |
| PD 1st Exp | PD 2nd Exp | PD 3rd Exp |
| PD 1st Exp | PD 2nd Exp | PD 3rd Exp |
| PD 1st Exp | PD 2nd Exp | PD 3rd Exp |
| PD 1st Exp | PD 2nd Exp | PD 3rd Exp |
|            | PD 2nd Exp |            |
| PD 1st Exp | PD 2nd Exp | PD 3rd Exp |
| PD 1st Exp | PD 2nd Exp | PD 3rd Exp |
| PD 1st Exp |            | PD 3rd Exp |
| PD 1st Exp | PD 2nd Exp | PD 3rd Exp |
| PD 1st Exp | PD 2nd Exp | PD 3rd Exp |
|            |            | PD 3rd Exp |
|            |            | PD 3rd Exp |
|            |            | PD 3rd Exp |
| PD 1st Exp | PD 2nd Exp | PD 3rd Exp |
| PD 1st Exp | PD 2nd Exp | PD 3rd Exp |
|            |            | PD 3rd Exp |
| PD 1st Exp | PD 2nd Exp | PD 3rd Exp |
|            |            | PD 3rd Exp |
| PD 1st Exp | PD 2nd Exp | PD 3rd Exp |
|            |            | PD 3rd Exp |
|            | PD 2nd Exp |            |
|            | PD 2nd Exp | PD 3rd Exp |
| PD 1st Exp | PD 2nd Exp | PD 3rd Exp |
|            | PD 2nd Exp | PD 3rd Exp |
| PD 1st Exp | PD 2nd Exp | PD 3rd Exp |
|            | PD 2nd Exp | PD 3rd Exp |
| PD 1st Exp | PD 2nd Exp | PD 3rd Exp |
|            | PD 2nd Exp | PD 3rd Exp |
|            | PD 2nd Exp | PD 3rd Exp |
|            | PD 2nd Exp |            |
|            | PD 2nd Exp |            |
|            | PD 2nd Exp | PD 3rd Exp |

|            |            |            |
|------------|------------|------------|
| PD 1st Exp | PD 2nd Exp | PD 3rd Exp |
|            |            | PD 3rd Exp |
|            | PD 2nd Exp |            |
| PD 1st Exp | PD 2nd Exp | PD 3rd Exp |
|            | PD 2nd Exp |            |
|            | PD 2nd Exp | PD 3rd Exp |
|            | PD 2nd Exp | PD 3rd Exp |
|            | PD 2nd Exp | PD 3rd Exp |
| PD 1st Exp | PD 2nd Exp |            |
|            | PD 2nd Exp | PD 3rd Exp |
| PD 1st Exp | PD 2nd Exp | PD 3rd Exp |
| PD 1st Exp | PD 2nd Exp | PD 3rd Exp |
|            | PD 2nd Exp | PD 3rd Exp |
| PD 1st Exp | PD 2nd Exp | PD 3rd Exp |
| PD 1st Exp | PD 2nd Exp | PD 3rd Exp |
| PD 1st Exp | PD 2nd Exp | PD 3rd Exp |
|            | PD 2nd Exp |            |
| PD 1st Exp | PD 2nd Exp |            |
| PD 1st Exp | PD 2nd Exp |            |
| PD 1st Exp | PD 2nd Exp | PD 3rd Exp |
| PD 1st Exp | PD 2nd Exp | PD 3rd Exp |
|            | PD 2nd Exp |            |
|            | PD 2nd Exp | PD 3rd Exp |
|            |            | PD 3rd Exp |
|            |            | PD 3rd Exp |
|            |            | PD 3rd Exp |
|            | PD 2nd Exp | PD 3rd Exp |
|            | PD 2nd Exp | PD 3rd Exp |
|            | PD 2nd Exp | PD 3rd Exp |
|            |            | PD 3rd Exp |
| PD 1st Exp | PD 2nd Exp | PD 3rd Exp |
| PD 1st Exp | PD 2nd Exp |            |
|            | PD 2nd Exp | PD 3rd Exp |

|            |            |            |
|------------|------------|------------|
|            |            | PD 3rd Exp |
|            |            | PD 3rd Exp |
| PD 1st Exp |            | PD 3rd Exp |
|            | PD 2nd Exp |            |
|            | PD 2nd Exp |            |
| PD 1st Exp | PD 2nd Exp |            |
| PD 1st Exp | PD 2nd Exp | PD 3rd Exp |
| PD 1st Exp |            | PD 3rd Exp |
| PD 1st Exp | PD 2nd Exp | PD 3rd Exp |
|            | PD 2nd Exp | PD 3rd Exp |
| PD 1st Exp |            | PD 3rd Exp |
| PD 1st Exp | PD 2nd Exp | PD 3rd Exp |
| PD 1st Exp | PD 2nd Exp | PD 3rd Exp |
|            | PD 2nd Exp | PD 3rd Exp |
|            |            | PD 3rd Exp |
| PD 1st Exp | PD 2nd Exp | PD 3rd Exp |
|            | PD 2nd Exp | PD 3rd Exp |
| PD 1st Exp | PD 2nd Exp | PD 3rd Exp |
| PD 1st Exp | PD 2nd Exp |            |
|            | PD 2nd Exp |            |
|            | PD 2nd Exp |            |
|            | PD 2nd Exp |            |
| PD 1st Exp | PD 2nd Exp |            |
| PD 1st Exp | PD 2nd Exp | PD 3rd Exp |
|            | PD 2nd Exp | PD 3rd Exp |
|            |            | PD 3rd Exp |
| PD 1st Exp | PD 2nd Exp | PD 3rd Exp |
| PD 1st Exp | PD 2nd Exp | PD 3rd Exp |
|            | PD 2nd Exp |            |
|            | PD 2nd Exp | PD 3rd Exp |
|            |            | PD 3rd Exp |
|            | PD 2nd Exp |            |
| PD 1st Exp | PD 2nd Exp | PD 3rd Exp |
|            | PD 2nd Exp | PD 3rd Exp |
|            |            | PD 3rd Exp |
|            | PD 2nd Exp |            |
|            | PD 2nd Exp |            |

PD 1st Exp PD 2nd Exp PD 3rd Exp  
PD 3rd Exp  
PD 2nd Exp PD 3rd Exp  
PD 2nd Exp  
PD 2nd Exp PD 3rd Exp  
PD 2nd Exp  
PD 2nd Exp PD 3rd Exp  
PD 1st Exp PD 2nd Exp PD 3rd Exp  
PD 2nd Exp PD 3rd Exp  
PD 1st Exp PD 2nd Exp PD 3rd Exp  
PD 2nd Exp  
PD 2nd Exp PD 3rd Exp  
PD 1st Exp PD 2nd Exp PD 3rd Exp  
PD 1st Exp PD 2nd Exp  
PD 2nd Exp  
PD 2nd Exp PD 3rd Exp  
PD 2nd Exp PD 3rd Exp  
PD 3rd Exp  
PD 3rd Exp  
PD 2nd Exp PD 3rd Exp  
PD 2nd Exp PD 3rd Exp  
PD 2nd Exp PD 3rd Exp  
PD 2nd Exp  
PD 1st Exp PD 2nd Exp  
PD 2nd Exp  
PD 2nd Exp  
PD 2nd Exp  
PD 2nd Exp  
PD 2nd Exp  
PD 1st Exp PD 2nd Exp  
PD 1st Exp PD 2nd Exp  
PD 2nd Exp  
PD 2nd Exp



PD 1st Exp PD 2nd Exp  
PD 2nd Exp PD 3rd Exp  
PD 3rd Exp  
PD 3rd Exp  
PD 2nd Exp  
PD 2nd Exp  
PD 2nd Exp PD 3rd Exp  
PD 2nd Exp  
PD 3rd Exp  
PD 2nd Exp PD 3rd Exp  
PD 1st Exp PD 2nd Exp PD 3rd Exp  
PD 2nd Exp  
PD 1st Exp PD 2nd Exp  
PD 2nd Exp PD 3rd Exp  
PD 1st Exp PD 2nd Exp PD 3rd Exp  
PD 1st Exp  
PD 1st Exp  
PD 2nd Exp PD 3rd Exp  
PD 2nd Exp  
PD 2nd Exp  
PD 2nd Exp PD 3rd Exp  
PD 3rd Exp  
PD 3rd Exp  
PD 3rd Exp  
PD 3rd Exp  
PD 3rd Exp  
PD 2nd Exp PD 3rd Exp  
PD 2nd Exp PD 3rd Exp  
PD 3rd Exp  
PD 3rd Exp

PD 1st Exp PD 2nd Exp PD 3rd Exp  
PD 2nd Exp

PD 2nd Exp  
PD 2nd Exp  
PD 2nd Exp  
PD 2nd Exp PD 3rd Exp  
PD 2nd Exp

PD 3rd Exp  
PD 2nd Exp  
PD 2nd Exp

PD 2nd Exp  
PD 3rd Exp  
PD 2nd Exp PD 3rd Exp  
PD 1st Exp PD 2nd Exp  
PD 2nd Exp  
PD 2nd Exp  
PD 2nd Exp  
PD 2nd Exp  
PD 2nd Exp  
PD 2nd Exp PD 3rd Exp  
PD 2nd Exp

PD 1st Exp PD 2nd Exp  
PD 2nd Exp  
PD 2nd Exp

PD 1st Exp  
PD 1st Exp



PD 1st Exp

PD 2nd Exp

PD 1st Exp

PD 2nd Exp PD 3rd Exp

PD 2nd Exp PD 3rd Exp

PD 1st Exp

PD 2nd Exp

PD 1st Exp

PD 2nd Exp

PD 1st Exp

PD 1st Exp

PD 2nd Exp PD 3rd Exp

PD 1st Exp

PD 2nd Exp PD 3rd Exp

PD 2nd Exp

PD 1st Exp PD 2nd Exp  
PD 1st Exp PD 2nd Exp  
PD 2nd Exp  
PD 2nd Exp  
PD 1st Exp PD 2nd Exp  
PD 1st Exp PD 2nd Exp PD 3rd Exp  
PD 2nd Exp PD 3rd Exp  
PD 2nd Exp  
PD 1st Exp  
PD 2nd Exp  
PD 2nd Exp  
PD 1st Exp PD 2nd Exp PD 3rd Exp  
PD 2nd Exp  
PD 2nd Exp PD 3rd Exp  
PD 1st Exp PD 2nd Exp PD 3rd Exp  
PD 1st Exp PD 2nd Exp  
PD 1st Exp PD 2nd Exp  
PD 2nd Exp  
PD 2nd Exp  
PD 2nd Exp  
PD 2nd Exp  
PD 1st Exp PD 2nd Exp PD 3rd Exp  
PD 2nd Exp  
PD 2nd Exp  
PD 1st Exp PD 2nd Exp  
PD 2nd Exp PD 3rd Exp

PD 2nd Exp  
PD 2nd Exp  
PD 2nd Exp PD 3rd Exp

PD 1st Exp

PD 2nd Exp  
PD 2nd Exp  
PD 2nd Exp

PD 1st Exp

PD 2nd Exp  
PD 2nd Exp  
PD 2nd Exp  
PD 2nd Exp  
PD 2nd Exp  
PD 2nd Exp  
PD 2nd Exp  
PD 2nd Exp  
PD 2nd Exp  
PD 2nd Exp

PD 1st Exp

PD 2nd Exp  
PD 2nd Exp

PD 1st Exp

PD 2nd Exp PD 3rd Exp  
PD 3rd Exp

PD 1st Exp

PD 2nd Exp

PD 2nd Exp PD 3rd Exp

PD 2nd Exp

PD 1st Exp

PD 2nd Exp  
PD 2nd Exp

PD 2nd Exp

PD 1st Exp

PD 2nd Exp

PD 1st Exp

PD 1st Exp

PD 1st Exp



PD 1st Exp PD 3rd Exp  
PD 3rd Exp  
PD 2nd Exp  
PD 3rd Exp  
PD 3rd Exp

PD 2nd Exp  
PD 1st Exp PD 2nd Exp  
PD 3rd Exp  
PD 1st Exp PD 2nd Exp PD 3rd Exp  
PD 1st Exp PD 2nd Exp PD 3rd Exp  
PD 2nd Exp PD 3rd Exp  
PD 2nd Exp PD 3rd Exp  
PD 3rd Exp  
PD 1st Exp PD 2nd Exp PD 3rd Exp  
PD 2nd Exp PD 3rd Exp

PD 2nd Exp  
PD 3rd Exp

PD 2nd Exp  
PD 2nd Exp  
PD 2nd Exp  
PD 2nd Exp

PD 2nd Exp

PD 1st Exp PD 2nd Exp

PD 1st Exp PD 2nd Exp

PD 1st Exp

PD 1st Exp

PD 1st Exp

PD 1st Exp PD 3rd Exp

PD 1st Exp

PD 1st Exp PD 2nd Exp

PD 1st Exp PD 2nd Exp

PD 2nd Exp

PD 2nd Exp

PD 2nd Exp PD 3rd Exp

PD 2nd Exp

PD 2nd Exp PD 3rd Exp

PD 1st Exp PD 2nd Exp PD 3rd Exp

PD 2nd Exp

PD 1st Exp PD 2nd Exp PD 3rd Exp

PD 1st Exp PD 2nd Exp PD 3rd Exp

PD 2nd Exp PD 3rd Exp

PD 2nd Exp

PD 2nd Exp

PD 2nd Exp

PD 1st Exp PD 2nd Exp PD 3rd Exp

PD 1st Exp PD 2nd Exp PD 3rd Exp

PD 2nd Exp PD 3rd Exp

PD 2nd Exp PD 3rd Exp

PD 2nd Exp PD 3rd Exp

PD 2nd Exp

PD 2nd Exp PD 3rd Exp

PD 2nd Exp

PD 2nd Exp  
PD 2nd Exp  
PD 2nd Exp  
PD 2nd Exp  
PD 2nd Exp  
PD 1st Exp PD 2nd Exp PD 3rd Exp  
PD 2nd Exp  
PD 1st Exp PD 2nd Exp PD 3rd Exp  
PD 2nd Exp PD 3rd Exp  
PD 1st Exp PD 2nd Exp PD 3rd Exp  
PD 2nd Exp  
PD 2nd Exp PD 3rd Exp  
PD 2nd Exp  
PD 1st Exp PD 2nd Exp PD 3rd Exp  
PD 2nd Exp PD 3rd Exp  
PD 1st Exp PD 2nd Exp PD 3rd Exp  
PD 1st Exp PD 2nd Exp PD 3rd Exp  
PD 2nd Exp PD 3rd Exp  
PD 2nd Exp PD 3rd Exp  
PD 1st Exp PD 2nd Exp PD 3rd Exp  
PD 1st Exp PD 2nd Exp PD 3rd Exp  
PD 2nd Exp PD 3rd Exp  
PD 2nd Exp  
PD 1st Exp PD 2nd Exp  
PD 2nd Exp  
PD 3rd Exp  
PD 2nd Exp PD 3rd Exp  
PD 1st Exp PD 2nd Exp PD 3rd Exp  
PD 2nd Exp

PD 1st Exp

PD 1st Exp

PD 2nd Exp

PD 1st Exp

PD 2nd Exp

PD 1st Exp

PD 3rd Exp

PD 1st Exp
