# Supplementary material
Source: PubMed Central journal article supplement (PMC5108054)
Supplement: NIHMS436991-supplement-S1B.pdf [file NIHMS436991-supplement-S1B.pdf]

|        |            |                                                                                |
|--------|------------|--------------------------------------------------------------------------------|
| P16700 | CYSP_ECOLI | Thiosulfate-binding protein                                                    |
| P0A9D8 | DAPD_ECOLI | 2,3,4,5-tetrahydropyridine-2,6-dicarboxylate N-succinyltransferase             |
| P0ACF0 | DBHA_ECOLI | DNA-binding protein HU-alpha                                                   |
| P0ACF0 | DBHA_ECOLI | DNA-binding protein HU-alpha                                                   |
| P0ACF0 | DBHA_ECOLI | DNA-binding protein HU-alpha                                                   |
| P0ACF0 | DBHA_ECOLI | DNA-binding protein HU-alpha                                                   |
| P0ACF0 | DBHA_ECOLI | DNA-binding protein HU-alpha                                                   |
| P0ACF4 | DBHB_ECOLI | DNA-binding protein HU-beta                                                    |
| P0ACF4 | DBHB_ECOLI | DNA-binding protein HU-beta                                                    |
| P0ACF4 | DBHB_ECOLI | DNA-binding protein HU-beta                                                    |
| P0ACF4 | DBHB_ECOLI | DNA-binding protein HU-beta                                                    |
| P0ACF4 | DBHB_ECOLI | DNA-binding protein HU-beta                                                    |
| P0ACF4 | DBHB_ECOLI | DNA-binding protein HU-beta                                                    |
| P0ACF4 | DBHB_ECOLI | DNA-binding protein HU-beta                                                    |
| P0ACF4 | DBHB_ECOLI | DNA-binding protein HU-beta                                                    |
| P0A6J8 | DDLA_ECOLI | D-alanine--D-alanine ligase A                                                  |
| P0A6J8 | DDLA_ECOLI | D-alanine--D-alanine ligase A                                                  |
| P0A6K3 | DEF_ECOLI  | Peptide deformylase                                                            |
| P0A6K3 | DEF_ECOLI  | Peptide deformylase                                                            |
| POC0V0 | DEGP_ECOLI | Protease do                                                                    |
| P0A6K6 | DEOB_ECOLI | Phosphopentomutase                                                             |
| P0A6L0 | DEOC_ECOLI | Deoxyribose-phosphate aldolase                                                 |
| P0A6L0 | DEOC_ECOLI | Deoxyribose-phosphate aldolase                                                 |
| POABP8 | DEOD_ECOLI | Purine nucleoside phosphorylase deoD-type                                      |
| POABP8 | DEOD_ECOLI | Purine nucleoside phosphorylase deoD-type                                      |
| POABP8 | DEOD_ECOLI | Purine nucleoside phosphorylase deoD-type                                      |
| POABP8 | DEOD_ECOLI | Purine nucleoside phosphorylase deoD-type                                      |
| POABP8 | DEOD_ECOLI | Purine nucleoside phosphorylase deoD-type                                      |
| POABP8 | DEOD_ECOLI | Purine nucleoside phosphorylase deoD-type                                      |
| POABP8 | DEOD_ECOLI | Purine nucleoside phosphorylase deoD-type                                      |
| P76015 | DHAK_ECOLI | PTS-dependent dihydroxyacetone kinase, dihydroxyacetone-bisphosphate dependent |
| P37349 | DHAM_ECOLI | PTS-dependent dihydroxyacetone kinase, phosphotransferase dependent            |
| P37349 | DHAM_ECOLI | PTS-dependent dihydroxyacetone kinase, phosphotransferase dependent            |
| P37349 | DHAM_ECOLI | PTS-dependent dihydroxyacetone kinase, phosphotransferase dependent            |
| P37349 | DHAM_ECOLI | PTS-dependent dihydroxyacetone kinase, phosphotransferase dependent            |



















|        |             |                                                      |
|--------|-------------|------------------------------------------------------|
| P0A953 | FABB_ECOLI  | 3-oxoacyl-[acyl-carrier-protein] synthase 1          |
| P0AAI9 | FABD_ECOLI  | Malonyl CoA-acyl carrier protein transacylase        |
| P0AAI9 | FABD_ECOLI  | Malonyl CoA-acyl carrier protein transacylase        |
| P0AAI9 | FABD_ECOLI  | Malonyl CoA-acyl carrier protein transacylase        |
| P0AAI9 | FABD_ECOLI  | Malonyl CoA-acyl carrier protein transacylase        |
| P0AAI9 | FABD_ECOLI  | Malonyl CoA-acyl carrier protein transacylase        |
| P0AAI9 | FABD_ECOLI  | Malonyl CoA-acyl carrier protein transacylase        |
| P0AAI9 | FABD_ECOLI  | Malonyl CoA-acyl carrier protein transacylase        |
| P0AAI9 | FABD_ECOLI  | Malonyl CoA-acyl carrier protein transacylase        |
| P0AAI9 | FABD_ECOLI  | Malonyl CoA-acyl carrier protein transacylase        |
| P0AAI5 | FABF_ECOLI  | 3-oxoacyl-[acyl-carrier-protein] synthase 2          |
| P0AAI5 | FABF_ECOLI  | 3-oxoacyl-[acyl-carrier-protein] synthase 2          |
| P0AAI5 | FABF_ECOLI  | 3-oxoacyl-[acyl-carrier-protein] synthase 2          |
| P0AEK2 | FABG_ECOLI  | 3-oxoacyl-[acyl-carrier-protein] reductase           |
| P0A6R0 | FABH_ECOLI  | 3-oxoacyl-[acyl-carrier-protein] synthase 3          |
| P0AEK4 | FABI_ECOLI  | Enoyl-[acyl-carrier-protein] reductase [NADH]        |
| P0AEK4 | FABI_ECOLI  | Enoyl-[acyl-carrier-protein] reductase [NADH]        |
| P13024 | FDHE_ECOLI  | Protein fdhE                                         |
| P13024 | FDHE_ECOLI  | Protein fdhE                                         |
| P04128 | FIMA1_ECOLI | Type-1 fimbrial protein, A chain                     |
| P04128 | FIMA1_ECOLI | Type-1 fimbrial protein, A chain                     |
| P04128 | FIMA1_ECOLI | Type-1 fimbrial protein, A chain                     |
| P04128 | FIMA1_ECOLI | Type-1 fimbrial protein, A chain                     |
| P04128 | FIMA1_ECOLI | Type-1 fimbrial protein, A chain                     |
| P08189 | FIMF_ECOLI  | Protein fimF                                         |
| P08191 | FIMH_ECOLI  | Protein fimH                                         |
| P45523 | FKBA_ECOLI  | FKBP-type peptidyl-prolyl cis-trans isomerase fkpA   |
| P45523 | FKBA_ECOLI  | FKBP-type peptidyl-prolyl cis-trans isomerase fkpA   |
| P45523 | FKBA_ECOLI  | FKBP-type peptidyl-prolyl cis-trans isomerase fkpA   |
| P45523 | FKBA_ECOLI  | FKBP-type peptidyl-prolyl cis-trans isomerase fkpA   |
| P45523 | FKBA_ECOLI  | FKBP-type peptidyl-prolyl cis-trans isomerase fkpA   |
| P45523 | FKBA_ECOLI  | FKBP-type peptidyl-prolyl cis-trans isomerase fkpA   |
| P45523 | FKBA_ECOLI  | FKBP-type peptidyl-prolyl cis-trans isomerase fkpA   |
| P0A9L3 | FKBB_ECOLI  | FKBP-type 22 kDa peptidyl-prolyl cis-trans isomerase |
| P0A9L3 | FKBB_ECOLI  | FKBP-type 22 kDa peptidyl-prolyl cis-trans isomerase |
| P0A9L3 | FKBB_ECOLI  | FKBP-type 22 kDa peptidyl-prolyl cis-trans isomerase |
| P0A9L3 | FKBB_ECOLI  | FKBP-type 22 kDa peptidyl-prolyl cis-trans isomerase |
| P61949 | FLAV_ECOLI  | Flavodoxin-1                                         |
| P61949 | FLAV_ECOLI  | Flavodoxin-1                                         |
| P61949 | FLAV_ECOLI  | Flavodoxin-1                                         |

|        |            |                                            |
|--------|------------|--------------------------------------------|
| P23882 | FMT_ECOLI  | Methionyl-tRNA formyltransferase           |
| P23882 | FMT_ECOLI  | Methionyl-tRNA formyltransferase           |
| P0AC16 | FOLB_ECOLI | Dihydroneopterin aldolase                  |
| P0AC16 | FOLB_ECOLI | Dihydroneopterin aldolase                  |
| P00363 | FRDA_ECOLI | Fumarate reductase flavoprotein subunit    |
| P0AEN1 | FRE_ECOLI  | NAD(P)H-flavin reductase                   |
| P0AEN1 | FRE_ECOLI  | NAD(P)H-flavin reductase                   |
| P25437 | FRMA_ECOLI | S-(hydroxymethyl)glutathione dehydrogenase |
| P25437 | FRMA_ECOLI | S-(hydroxymethyl)glutathione dehydrogenase |
| P32669 | FSAB_ECOLI | Fructose-6-phosphate aldolase 2            |
| P32669 | FSAB_ECOLI | Fructose-6-phosphate aldolase 2            |
| P46889 | FTSK_ECOLI | DNA translocase ftsK                       |
| P46889 | FTSK_ECOLI | DNA translocase ftsK                       |
| P0A9A6 | FTSZ_ECOLI | Cell division protein ftsZ                 |
| P0A9A6 | FTSZ_ECOLI | Cell division protein ftsZ                 |
| P0A9A6 | FTSZ_ECOLI | Cell division protein ftsZ                 |
| P0A9A6 | FTSZ_ECOLI | Cell division protein ftsZ                 |
| P0A9A6 | FTSZ_ECOLI | Cell division protein ftsZ                 |
| P0A9A6 | FTSZ_ECOLI | Cell division protein ftsZ                 |
| P0A9A6 | FTSZ_ECOLI | Cell division protein ftsZ                 |
| P0A9A6 | FTSZ_ECOLI | Cell division protein ftsZ                 |
| P0A9A6 | FTSZ_ECOLI | Cell division protein ftsZ                 |
| P0A9A6 | FTSZ_ECOLI | Cell division protein ftsZ                 |
| P0A9A6 | FTSZ_ECOLI | Cell division protein ftsZ                 |
| P0A9A6 | FTSZ_ECOLI | Cell division protein ftsZ                 |
| P0A9A6 | FTSZ_ECOLI | Cell division protein ftsZ                 |
| P0A9A6 | FTSZ_ECOLI | Cell division protein ftsZ                 |
| P0AC33 | FUMB_ECOLI | Fumarate hydratase class I, aerobic        |
| P14407 | FUMB_ECOLI | Fumarate hydratase class I, anaerobic      |
| P14407 | FUMB_ECOLI | Fumarate hydratase class I, anaerobic      |
| P0A9B2 | G3P1_ECOLI | Glyceraldehyde-3-phosphate dehydrogenase A |
| P0A9B2 | G3P1_ECOLI | Glyceraldehyde-3-phosphate dehydrogenase A |
| P0A9B2 | G3P1_ECOLI | Glyceraldehyde-3-phosphate dehydrogenase A |
| P0A9B2 | G3P1_ECOLI | Glyceraldehyde-3-phosphate dehydrogenase A |
| P0A9B2 | G3P1_ECOLI | Glyceraldehyde-3-phosphate dehydrogenase A |
| P0A9B2 | G3P1_ECOLI | Glyceraldehyde-3-phosphate dehydrogenase A |
| P0A9B2 | G3P1_ECOLI | Glyceraldehyde-3-phosphate dehydrogenase A |
| P0A9B2 | G3P1_ECOLI | Glyceraldehyde-3-phosphate dehydrogenase A |
| P0A9B2 | G3P1_ECOLI | Glyceraldehyde-3-phosphate dehydrogenase A |
| P0A9B2 | G3P1_ECOLI | Glyceraldehyde-3-phosphate dehydrogenase A |
| P0A9B2 | G3P1_ECOLI | Glyceraldehyde-3-phosphate dehydrogenase A |
| P0A9B2 | G3P1_ECOLI | Glyceraldehyde-3-phosphate dehydrogenase A |
| P0A9B2 | G3P1_ECOLI | Glyceraldehyde-3-phosphate dehydrogenase A |
| P0A9B2 | G3P1_ECOLI | Glyceraldehyde-3-phosphate dehydrogenase A |
| P0A9B2 | G3P1_ECOLI | Glyceraldehyde-3-phosphate dehydrogenase A |
| P0A9B2 | G3P1_ECOLI | Glyceraldehyde-3-phosphate dehydrogenase A |
| P0A9B2 | G3P1_ECOLI | Glyceraldehyde-3-phosphate dehydrogenase A |
| P0A9B2 | G3P1_ECOLI | Glyceraldehyde-3-phosphate dehydrogenase A |
| P0AC53 | G6PD_ECOLI | Glucose-6-phosphate 1-dehydrogenase        |
| P0A6T1 | G6PI_ECOLI | Glucose-6-phosphate isomerase              |







|        |            |                                                             |
|--------|------------|-------------------------------------------------------------|
| POA825 | GLYA_ECOLI | Serine hydroxymethyltransferase                             |
| P63224 | GMHA_ECOLI | Phosphoheptose isomerase                                    |
| P63224 | GMHA_ECOLI | Phosphoheptose isomerase                                    |
| POACP5 | GNTR_ECOLI | HTH-type transcriptional regulator gntR                     |
| P62707 | GPMA_ECOLI | 2,3-bisphosphoglycerate-dependent phosphoglycerate mutase   |
| P62707 | GPMA_ECOLI | 2,3-bisphosphoglycerate-dependent phosphoglycerate mutase   |
| P62707 | GPMA_ECOLI | 2,3-bisphosphoglycerate-dependent phosphoglycerate mutase   |
| POA7A2 | GPMB_ECOLI | Probable phosphoglycerate mutase gpmB                       |
| POA7A2 | GPMB_ECOLI | Probable phosphoglycerate mutase gpmB                       |
| P37689 | GPMI_ECOLI | 2,3-bisphosphoglycerate-independent phosphoglycerate mutase |
| P37689 | GPMI_ECOLI | 2,3-bisphosphoglycerate-independent phosphoglycerate mutase |
| P37689 | GPMI_ECOLI | 2,3-bisphosphoglycerate-independent phosphoglycerate mutase |
| P37689 | GPMI_ECOLI | 2,3-bisphosphoglycerate-independent phosphoglycerate mutase |
| P37689 | GPMI_ECOLI | 2,3-bisphosphoglycerate-independent phosphoglycerate mutase |
| P37689 | GPMI_ECOLI | 2,3-bisphosphoglycerate-independent phosphoglycerate mutase |
| P37689 | GPMI_ECOLI | 2,3-bisphosphoglycerate-independent phosphoglycerate mutase |
| P68066 | GRCA_ECOLI | Autonomous glycy radical cofactor                           |
| P68066 | GRCA_ECOLI | Autonomous glycy radical cofactor                           |
| P68066 | GRCA_ECOLI | Autonomous glycy radical cofactor                           |
| P68066 | GRCA_ECOLI | Autonomous glycy radical cofactor                           |
| P68066 | GRCA_ECOLI | Autonomous glycy radical cofactor                           |
| P68066 | GRCA_ECOLI | Autonomous glycy radical cofactor                           |
| P68066 | GRCA_ECOLI | Autonomous glycy radical cofactor                           |
| P68066 | GRCA_ECOLI | Autonomous glycy radical cofactor                           |
| P68066 | GRCA_ECOLI | Autonomous glycy radical cofactor                           |
| P68066 | GRCA_ECOLI | Autonomous glycy radical cofactor                           |
| POA6W5 | GREA_ECOLI | Transcription elongation factor greA                        |
| POA6W5 | GREA_ECOLI | Transcription elongation factor greA                        |
| POA6W5 | GREA_ECOLI | Transcription elongation factor greA                        |
| POA6W5 | GREA_ECOLI | Transcription elongation factor greA                        |
| POA6W5 | GREA_ECOLI | Transcription elongation factor greA                        |

|        |            |                                          |
|--------|------------|------------------------------------------|
| P09372 | GRPE_ECOLI | Protein grpE                             |
| P23893 | GSA_ECOLI  | Glutamate-1-semialdehyde 2,1-aminomutase |
| P0A6W9 | GSH1_ECOLI | Glutamate--cysteine ligase               |
| P06715 | GSHR_ECOLI | Glutathione reductase                    |
| POAES4 | GYRA_ECOLI | DNA gyrase subunit A                     |
| POAES4 | GYRA_ECOLI | DNA gyrase subunit A                     |
| POAES4 | GYRA_ECOLI | DNA gyrase subunit A                     |
| POAES4 | GYRA_ECOLI | DNA gyrase subunit A                     |
| POAES4 | GYRA_ECOLI | DNA gyrase subunit A                     |
| POAES4 | GYRA_ECOLI | DNA gyrase subunit A                     |
| POAES4 | GYRA_ECOLI | DNA gyrase subunit A                     |
| POAES4 | GYRA_ECOLI | DNA gyrase subunit A                     |
| POAES4 | GYRA_ECOLI | DNA gyrase subunit A                     |
| POAES4 | GYRA_ECOLI | DNA gyrase subunit A                     |
| POAES4 | GYRA_ECOLI | DNA gyrase subunit A                     |
| POAES4 | GYRA_ECOLI | DNA gyrase subunit A                     |
| POAES4 | GYRA_ECOLI | DNA gyrase subunit A                     |
| POAES4 | GYRA_ECOLI | DNA gyrase subunit A                     |
| POAES4 | GYRA_ECOLI | DNA gyrase subunit A                     |
| POAES4 | GYRA_ECOLI | DNA gyrase subunit A                     |
| POAES4 | GYRA_ECOLI | DNA gyrase subunit A                     |
| POAES4 | GYRA_ECOLI | DNA gyrase subunit A                     |
| POAES4 | GYRA_ECOLI | DNA gyrase subunit A                     |
| POAES4 | GYRA_ECOLI | DNA gyrase subunit A                     |
| POAES4 | GYRA_ECOLI | DNA gyrase subunit A                     |
| POAES4 | GYRA_ECOLI | DNA gyrase subunit A                     |
| POAES4 | GYRA_ECOLI | DNA gyrase subunit A                     |
| POAES4 | GYRA_ECOLI | DNA gyrase subunit A                     |
| POAES4 | GYRA_ECOLI | DNA gyrase subunit A                     |
| POAES4 | GYRA_ECOLI | DNA gyrase subunit A                     |
| POAES4 | GYRA_ECOLI | DNA gyrase subunit A                     |
| POAES4 | GYRA_ECOLI | DNA gyrase subunit A                     |
| POAES4 | GYRA_ECOLI | DNA gyrase subunit A                     |
| POAES4 | GYRA_ECOLI | DNA gyrase subunit A                     |
| POAES4 | GYRA_ECOLI | DNA gyrase subunit A                     |
| POAES6 | GYRB_ECOLI | DNA gyrase subunit B                     |
| POAES6 | GYRB_ECOLI | DNA gyrase subunit B                     |
| P31658 | HCHA_ECOLI | Chaperone protein hchA                   |
| P31658 | HCHA_ECOLI | Chaperone protein hchA                   |
| POA6X3 | HFQ_ECOLI  | Protein hfq                              |
| POA6X3 | HFQ_ECOLI  | Protein hfq                              |
| POA6X3 | HFQ_ECOLI  | Protein hfq                              |



|        |             |                                        |
|--------|-------------|----------------------------------------|
| P76658 | HLDE_ECOLI  | Bifunctional protein hldE              |
| P76658 | HLDE_ECOLI  | Bifunctional protein hldE              |
| P76658 | HLDE_ECOLI  | Bifunctional protein hldE              |
| P76658 | HLDE_ECOLI  | Bifunctional protein hldE              |
| P76658 | HLDE_ECOLI  | Bifunctional protein hldE              |
| P76658 | HLDE_ECOLI  | Bifunctional protein hldE              |
| P76658 | HLDE_ECOLI  | Bifunctional protein hldE              |
| P76658 | HLDE_ECOLI  | Bifunctional protein hldE              |
| P76658 | HLDE_ECOLI  | Bifunctional protein hldE              |
| P76658 | HLDE_ECOLI  | Bifunctional protein hldE              |
| P76658 | HLDE_ECOLI  | Bifunctional protein hldE              |
| P76658 | HLDE_ECOLI  | Bifunctional protein hldE              |
| P76658 | HLDE_ECOLI  | Bifunctional protein hldE              |
| P76658 | HLDE_ECOLI  | Bifunctional protein hldE              |
| P76658 | HLDE_ECOLI  | Bifunctional protein hldE              |
| P76658 | HLDE_ECOLI  | Bifunctional protein hldE              |
| P76658 | HLDE_ECOLI  | Bifunctional protein hldE              |
| P76658 | HLDE_ECOLI  | Bifunctional protein hldE              |
| P76658 | HLDE_ECOLI  | Bifunctional protein hldE              |
| P76658 | HLDE_ECOLI  | Bifunctional protein hldE              |
| P08715 | HLYAP_ECOLX | Hemolysin, plasmid                     |
| P0ACF8 | HNS_ECOLI   | DNA-binding protein H-NS               |
| P0A9M2 | HPRT_ECOLI  | Hypoxanthine phosphoribosyltransferase |
| P0A6Z1 | HSCA_ECOLI  | Chaperone protein hscA                 |
| P0A6Z1 | HSCA_ECOLI  | Chaperone protein hscA                 |
| P0A6Z1 | HSCA_ECOLI  | Chaperone protein hscA                 |
| P0A6Z1 | HSCA_ECOLI  | Chaperone protein hscA                 |
| P0A6Z1 | HSCA_ECOLI  | Chaperone protein hscA                 |
| P0A6Z1 | HSCA_ECOLI  | Chaperone protein hscA                 |
| P0A6Z1 | HSCA_ECOLI  | Chaperone protein hscA                 |
| P0A6Z1 | HSCA_ECOLI  | Chaperone protein hscA                 |
| P0A6Z1 | HSCA_ECOLI  | Chaperone protein hscA                 |
| P0A6Z1 | HSCA_ECOLI  | Chaperone protein hscA                 |
| P0A6Z1 | HSCA_ECOLI  | Chaperone protein hscA                 |
| P0A6Z1 | HSCA_ECOLI  | Chaperone protein hscA                 |
| P0A6Z1 | HSCA_ECOLI  | Chaperone protein hscA                 |
| P0A6Z1 | HSCA_ECOLI  | Chaperone protein hscA                 |
| P0A6Z1 | HSCA_ECOLI  | Chaperone protein hscA                 |
| P0A6Z1 | HSCA_ECOLI  | Chaperone protein hscA                 |
| P0A6Z1 | HSCA_ECOLI  | Chaperone protein hscA                 |
| P0A6Z1 | HSCA_ECOLI  | Chaperone protein hscA                 |
| P0A6Z1 | HSCA_ECOLI  | Chaperone protein hscA                 |
| P0A6Z1 | HSCA_ECOLI  | Chaperone protein hscA                 |
| P0A6Y5 | HSLO_ECOLI  | 33 kDa chaperonin                      |
| P0A6Y5 | HSLO_ECOLI  | 33 kDa chaperonin                      |
| P0A6Y5 | HSLO_ECOLI  | 33 kDa chaperonin                      |
| P0A6Y5 | HSLO_ECOLI  | 33 kDa chaperonin                      |

|        |            |                                                        |
|--------|------------|--------------------------------------------------------|
| P0A6Y5 | HSLO_ECOLI | 33 kDa chaperonin                                      |
| P0A7B8 | HSLV_ECOLI | ATP-dependent protease subunit HsIV                    |
| P0A7B8 | HSLV_ECOLI | ATP-dependent protease subunit HsIV                    |
| P0A6Z3 | HTPG_ECOLI | Chaperone protein htpG                                 |
| P0A6Z3 | HTPG_ECOLI | Chaperone protein htpG                                 |
| P0A6Z3 | HTPG_ECOLI | Chaperone protein htpG                                 |
| P0A6Z3 | HTPG_ECOLI | Chaperone protein htpG                                 |
| P0A6Z3 | HTPG_ECOLI | Chaperone protein htpG                                 |
| P0A6Z3 | HTPG_ECOLI | Chaperone protein htpG                                 |
| P37182 | HYBD_ECOLI | Hydrogenase 2 maturation protease                      |
| P37182 | HYBD_ECOLI | Hydrogenase 2 maturation protease                      |
| P37182 | HYBD_ECOLI | Hydrogenase 2 maturation protease                      |
| P37182 | HYBD_ECOLI | Hydrogenase 2 maturation protease                      |
| P37182 | HYBD_ECOLI | Hydrogenase 2 maturation protease                      |
| P0A705 | IF2_ECOLI  | Translation initiation factor IF-2                     |
| P0A705 | IF2_ECOLI  | Translation initiation factor IF-2                     |
| P0A705 | IF2_ECOLI  | Translation initiation factor IF-2                     |
| P0A705 | IF2_ECOLI  | Translation initiation factor IF-2                     |
| P0A705 | IF2_ECOLI  | Translation initiation factor IF-2                     |
| P0A705 | IF2_ECOLI  | Translation initiation factor IF-2                     |
| P0A705 | IF2_ECOLI  | Translation initiation factor IF-2                     |
| P0A705 | IF2_ECOLI  | Translation initiation factor IF-2                     |
| P0A705 | IF2_ECOLI  | Translation initiation factor IF-2                     |
| P0A705 | IF2_ECOLI  | Translation initiation factor IF-2                     |
| P0A6X7 | IHFA_ECOLI | Integration host factor subunit alpha                  |
| P0A6X7 | IHFA_ECOLI | Integration host factor subunit alpha                  |
| P0A6X7 | IHFA_ECOLI | Integration host factor subunit alpha                  |
| P0A6X7 | IHFA_ECOLI | Integration host factor subunit alpha                  |
| P0A6Y1 | IHFB_ECOLI | Integration host factor subunit beta                   |
| P0A6Y1 | IHFB_ECOLI | Integration host factor subunit beta                   |
| P0A6Y1 | IHFB_ECOLI | Integration host factor subunit beta                   |
| P0A6Y1 | IHFB_ECOLI | Integration host factor subunit beta                   |
| P0A7A9 | IPYR_ECOLI | Inorganic pyrophosphatase                              |
| P0AAC8 | ISCA_ECOLI | Iron-binding protein iscA                              |
| P0AAC8 | ISCA_ECOLI | Iron-binding protein iscA                              |
| P0A6B7 | ISCS_ECOLI | Cysteine desulfurase                                   |
| Q46893 | ISPD_ECOLI | 2-C-methyl-D-erythritol 4-phosphate cytidyltransferase |
| Q46893 | ISPD_ECOLI | 2-C-methyl-D-erythritol 4-phosphate cytidyltransferase |
| Q46893 | ISPD_ECOLI | 2-C-methyl-D-erythritol 4-phosphate cytidyltransferase |





|        |             |                                                                |
|--------|-------------|----------------------------------------------------------------|
| P0AD61 | KPYK1_ECOLI | Pyruvate kinase I                                              |
| P0AD61 | KPYK1_ECOLI | Pyruvate kinase I                                              |
| P0AD61 | KPYK1_ECOLI | Pyruvate kinase I                                              |
| P0AD61 | KPYK1_ECOLI | Pyruvate kinase I                                              |
| P0AD61 | KPYK1_ECOLI | Pyruvate kinase I                                              |
| P0AD61 | KPYK1_ECOLI | Pyruvate kinase I                                              |
| P0AD61 | KPYK1_ECOLI | Pyruvate kinase I                                              |
| P21599 | KPYK2_ECOLI | Pyruvate kinase II                                             |
| P21599 | KPYK2_ECOLI | Pyruvate kinase II                                             |
| P21599 | KPYK2_ECOLI | Pyruvate kinase II                                             |
| P21599 | KPYK2_ECOLI | Pyruvate kinase II                                             |
| P60785 | LEPA_ECOLI  | GTP-binding protein lepA                                       |
| P60785 | LEPA_ECOLI  | GTP-binding protein lepA                                       |
| P60716 | LIPA_ECOLI  | Lipoyl synthase                                                |
| P21645 | LPXD_ECOLI  | UDP-3-O-[3-hydroxymyristoyl] glucosamine N-acyltransferase     |
| P21645 | LPXD_ECOLI  | UDP-3-O-[3-hydroxymyristoyl] glucosamine N-acyltransferase     |
| P21645 | LPXD_ECOLI  | UDP-3-O-[3-hydroxymyristoyl] glucosamine N-acyltransferase     |
| P45578 | LUXS_ECOLI  | S-ribosylhomocysteine lyase                                    |
| P45578 | LUXS_ECOLI  | S-ribosylhomocysteine lyase                                    |
| POAEX9 | MALE_ECOLI  | Maltose-binding periplasmic protein                            |
| POAEX9 | MALE_ECOLI  | Maltose-binding periplasmic protein                            |
| POAEX9 | MALE_ECOLI  | Maltose-binding periplasmic protein                            |
| POAEX9 | MALE_ECOLI  | Maltose-binding periplasmic protein                            |
| POAEX9 | MALE_ECOLI  | Maltose-binding periplasmic protein                            |
| POAEX9 | MALE_ECOLI  | Maltose-binding periplasmic protein                            |
| POAEX9 | MALE_ECOLI  | Maltose-binding periplasmic protein                            |
| POAEX9 | MALE_ECOLI  | Maltose-binding periplasmic protein                            |
| POAEX9 | MALE_ECOLI  | Maltose-binding periplasmic protein                            |
| POAEX9 | MALE_ECOLI  | Maltose-binding periplasmic protein                            |
| POAEX9 | MALE_ECOLI  | Maltose-binding periplasmic protein                            |
| POAEX9 | MALE_ECOLI  | Maltose-binding periplasmic protein                            |
| POAEX9 | MALE_ECOLI  | Maltose-binding periplasmic protein                            |
| POAEX9 | MALE_ECOLI  | Maltose-binding periplasmic protein                            |
| POAEX9 | MALE_ECOLI  | Maltose-binding periplasmic protein                            |
| POAEX9 | MALE_ECOLI  | Maltose-binding periplasmic protein                            |
| POAEX9 | MALE_ECOLI  | Maltose-binding periplasmic protein                            |
| POAEX9 | MALE_ECOLI  | Maltose-binding periplasmic protein                            |
| P68187 | MALK_ECOLI  | Regulator of sigma S factor FliZ/Maltose/maltodextrin import A |
| P00946 | MANA_ECOLI  | Mannose-6-phosphate isomerase                                  |
| P00946 | MANA_ECOLI  | Mannose-6-phosphate isomerase                                  |
| POAEY5 | MDAB_ECOLI  | Modulator of drug activity B                                   |
| P61889 | MDH_ECOLI   | Malate dehydrogenase                                           |

|        |            |                                                             |
|--------|------------|-------------------------------------------------------------|
| P61889 | MDH_ECOLI  | Malate dehydrogenase                                        |
| POABU0 | MENB_ECOLI | Naphthoate synthase                                         |
| P25665 | METE_ECOLI | 5-methyltetrahydropteroyltriglutamate--homocysteine methylt |
| P13009 | METH_ECOLI | Methionine synthase                                         |
| P13009 | METH_ECOLI | Methionine synthase                                         |
| P13009 | METH_ECOLI |                                                             |
| P13009 | METH_ECOLI | Methionine synthase                                         |
| POA817 | METK_ECOLI | S-adenosylmethionine synthase                               |
| POA817 | METK_ECOLI | S-adenosylmethionine synthase                               |
| POA817 | METK_ECOLI | S-adenosylmethionine synthase                               |
| POA817 | METK_ECOLI | S-adenosylmethionine synthase                               |
| POA817 | METK_ECOLI | S-adenosylmethionine synthase                               |
| POA817 | METK_ECOLI | S-adenosylmethionine synthase                               |
| POA817 | METK_ECOLI | S-adenosylmethionine synthase                               |
| POA817 | METK_ECOLI | S-adenosylmethionine synthase                               |
| POA817 | METK_ECOLI | S-adenosylmethionine synthase                               |
| POA817 | METK_ECOLI | S-adenosylmethionine synthase                               |
| POA817 | METK_ECOLI | S-adenosylmethionine synthase                               |
| POA817 | METK_ECOLI | S-adenosylmethionine synthase                               |
| POA817 | METK_ECOLI | S-adenosylmethionine synthase                               |
| POAEI1 | MIAB_ECOLI | (Dimethylallyl)adenosine tRNA methylthiotransferase miaB    |
| POAEI1 | MIAB_ECOLI | (Dimethylallyl)adenosine tRNA methylthiotransferase miaB    |
| POAEI1 | MIAB_ECOLI | (Dimethylallyl)adenosine tRNA methylthiotransferase miaB    |
| POAEI1 | MIAB_ECOLI | (Dimethylallyl)adenosine tRNA methylthiotransferase miaB    |
| POAEI1 | MIAB_ECOLI | (Dimethylallyl)adenosine tRNA methylthiotransferase miaB    |
| POAEI1 | MIAB_ECOLI | (Dimethylallyl)adenosine tRNA methylthiotransferase miaB    |
| POAEZ3 | MIND_ECOLI | Septum site-determining protein minD                        |
| POAEZ3 | MIND_ECOLI | Septum site-determining protein minD                        |
| POAEZ3 | MIND_ECOLI | Septum site-determining protein minD                        |
| POAEZ3 | MIND_ECOLI | Septum site-determining protein minD                        |

|        |            |                                                            |
|--------|------------|------------------------------------------------------------|
| POAEZ3 | MIND_ECOLI | Septum site-determining protein minD                       |
| POAEZ3 | MIND_ECOLI | Septum site-determining protein minD                       |
| POAEZ3 | MIND_ECOLI | Septum site-determining protein minD                       |
| POAEZ3 | MIND_ECOLI | Septum site-determining protein minD                       |
| POAEZ3 | MIND_ECOLI | Septum site-determining protein minD                       |
| POAEZ3 | MIND_ECOLI | Septum site-determining protein minD                       |
| POAEZ3 | MIND_ECOLI | Septum site-determining protein minD                       |
| POAEZ3 | MIND_ECOLI | Septum site-determining protein minD                       |
| POAEZ3 | MIND_ECOLI | Septum site-determining protein minD                       |
| POAEZ3 | MIND_ECOLI | Septum site-determining protein minD                       |
| POA734 | MINE_ECOLI | Cell division topological specificity factor               |
| POA734 | MINE_ECOLI | Cell division topological specificity factor               |
| POA734 | MINE_ECOLI | Cell division topological specificity factor               |
| POADV7 | MLAC_ECOLI | Probable phospholipid-binding protein mlaC                 |
| POADV7 | MLAC_ECOLI | Probable phospholipid-binding protein mlaC                 |
| POADV7 | MLAC_ECOLI | Probable phospholipid-binding protein mlaC                 |
| POADV7 | MLAC_ECOLI | Probable phospholipid-binding protein mlaC                 |
| POADV7 | MLAC_ECOLI | Probable phospholipid-binding protein mlaC                 |
| POADV7 | MLAC_ECOLI | Probable phospholipid-binding protein mlaC                 |
| POADV7 | MLAC_ECOLI | Probable phospholipid-binding protein mlaC                 |
| P12281 | MOEA_ECOLI | Molybdopterin molybdenumtransferase                        |
| P37773 | MPL_ECOLI  | UDP-N-acetylmuramate:L-alanyl-gamma-D-glutamyl-meso-dian   |
| POA9X4 | MREB_ECOLI | Rod shape-determining protein mreB                         |
| POA9X4 | MREB_ECOLI | Rod shape-determining protein mreB                         |
| POA9X4 | MREB_ECOLI | Rod shape-determining protein mreB                         |
| POA9X4 | MREB_ECOLI | Rod shape-determining protein mreB                         |
| POA9X4 | MREB_ECOLI | Rod shape-determining protein mreB                         |
| POA9X4 | MREB_ECOLI | Rod shape-determining protein mreB                         |
| POA9X4 | MREB_ECOLI | Rod shape-determining protein mreB                         |
| POA9X4 | MREB_ECOLI | Rod shape-determining protein mreB                         |
| POA9X4 | MREB_ECOLI | Rod shape-determining protein mreB                         |
| POA744 | MSRA_ECOLI | Peptide methionine sulfoxide reductase msrA                |
| POA744 | MSRA_ECOLI | Peptide methionine sulfoxide reductase msrA                |
| POA744 | MSRA_ECOLI | Peptide methionine sulfoxide reductase msrA                |
| POA744 | MSRA_ECOLI | Peptide methionine sulfoxide reductase msrA                |
| P23909 | MUTS_ECOLI | DNA mismatch repair protein mutS                           |
| P23909 | MUTS_ECOLI | DNA mismatch repair protein mutS                           |
| P23909 | MUTS_ECOLI | DNA mismatch repair protein mutS                           |
| P23909 | MUTS_ECOLI | DNA mismatch repair protein mutS                           |
| P23909 | MUTS_ECOLI | DNA mismatch repair protein mutS                           |
| P23909 | MUTS_ECOLI | DNA mismatch repair protein mutS                           |
| POA6L4 | NANA_ECOLI | N-acetylneuraminate lyase                                  |
| POAF26 | NARJ_ECOLI | Nitrate reductase molybdenum cofactor assembly chaperone N |















|        |            |                                                          |
|--------|------------|----------------------------------------------------------|
| P05055 | PNP_ECOLI  | Polyribonucleotide nucleotidyltransferase                |
| P23869 | PPIB_ECOLI | Peptidyl-prolyl cis-trans isomerase B                    |
| P23869 | PPIB_ECOLI | Peptidyl-prolyl cis-trans isomerase B                    |
| P23869 | PPIB_ECOLI | Peptidyl-prolyl cis-trans isomerase B                    |
| P23869 | PPIB_ECOLI | Peptidyl-prolyl cis-trans isomerase B                    |
| P23538 | PPSA_ECOLI | Phosphoenolpyruvate synthase                             |
| P45577 | PROQ_ECOLI | ProP effector                                            |
| P45577 | PROQ_ECOLI | ProP effector                                            |
| P45577 | PROQ_ECOLI | ProP effector                                            |
| P23830 | PSS_ECOLI  | CDP-diacylglycerol--serine O-phosphatidyltransferase     |
| P08839 | PT1_ECOLI  | Phosphoenolpyruvate-protein phosphotransferase           |
| P0A9M8 | PTA_ECOLI  | Phosphate acetyltransferase                              |
| P69783 | PTGA_ECOLI | Glucose-specific phosphotransferase enzyme IIA component |

|        |            |                                                                |
|--------|------------|----------------------------------------------------------------|
| P69783 | PTGA_ECOLI | Glucose-specific phosphotransferase enzyme IIA component       |
| P69783 | PTGA_ECOLI | Glucose-specific phosphotransferase enzyme IIA component       |
| P69783 | PTGA_ECOLI | Glucose-specific phosphotransferase enzyme IIA component       |
| P69783 | PTGA_ECOLI | Glucose-specific phosphotransferase enzyme IIA component       |
| P69783 | PTGA_ECOLI | Glucose-specific phosphotransferase enzyme IIA component       |
| P69783 | PTGA_ECOLI | Glucose-specific phosphotransferase enzyme IIA component       |
| P0AA04 | PTHP_ECOLI | Phosphocarrier protein HPr                                     |
| P0AA04 | PTHP_ECOLI | Phosphocarrier protein HPr                                     |
| P69828 | PTKA_ECOLI | Galactitol-specific phosphotransferase enzyme IIA component    |
| P69828 | PTKA_ECOLI | Galactitol-specific phosphotransferase enzyme IIA component    |
| P69828 | PTKA_ECOLI | Galactitol-specific phosphotransferase enzyme IIA component    |
| P69828 | PTKA_ECOLI | Galactitol-specific phosphotransferase enzyme IIA component    |
| P69828 | PTKA_ECOLI | Galactitol-specific phosphotransferase enzyme IIA component    |
| P69828 | PTKA_ECOLI | Galactitol-specific phosphotransferase enzyme IIA component    |
| P69828 | PTKA_ECOLI | Galactitol-specific phosphotransferase enzyme IIA component    |
| P69828 | PTKA_ECOLI | Galactitol-specific phosphotransferase enzyme IIA component    |
| P37188 | PTKB_ECOLI | Galactitol-specific phosphotransferase enzyme IIB component    |
| P37188 | PTKB_ECOLI | Galactitol-specific phosphotransferase enzyme IIB component    |
| P37188 | PTKB_ECOLI | Galactitol-specific phosphotransferase enzyme IIB component    |
| P69795 | PTQB_ECOLI | N,N'-diacetylchitobiose-specific phosphotransferase enzyme IIE |
| P69829 | PTSN_ECOLI | Nitrogen regulatory protein                                    |
| P0A7D4 | PURA_ECOLI | Adenylosuccinate synthetase                                    |
| P0A7E5 | PYRG_ECOLI | CTP synthase                                                   |

|        |            |                                 |
|--------|------------|---------------------------------|
| P0A7E5 | PYRG_ECOLI | CTP synthase                    |
| P77756 | QUEC_ECOLI | 7-cyano-7-deazaguanine synthase |

| Peptide                    | Modified Sequence               | Midlog 1st control   |
|----------------------------|---------------------------------|----------------------|
| AAVL PANLIQAQR             | NH2-AAVL PANLIQAQR-COOH         | * Midlog 1st control |
| DYFGAHTYK                  | NH2-DYFGAHTYK-COOH              | * Midlog 1st control |
| EAYELVAPILTK               | NH2-EAYELVAPILTK-COOH           | * Midlog 1st control |
| EFVESLETPR                 | NH2-EFVESLETPR-COOH             | * Midlog 1st control |
| EKTEEVIAENPGK              | NH2-EKTEEVIAENPGK-COOH          | *                    |
| GYTVSIFNR                  | NH2-GYTVSIFNR-COOH              | * Midlog 1st control |
| IAAVAEDGEP CVTYIGADGAGHYVK | NH2-IAAVAEDGEP C<Cmm*>VTYIGAD   | * Midlog 1st control |
| IVSYAQGFSQLR               | NH2-IVSYAQGFSQLR-COOH           | * Midlog 1st control |
| KLV PYYTVK                 | NH2-KLV PYYTVK-COOH             | * Midlog 1st control |
| NLALNIESR                  | NH2-NLALNIESR-COOH              | * Midlog 1st control |
| SKQQIGVVGmAVmGR            | NH2-SKQQIGVVG M<Mox>AVM<Mox     | * Midlog 1st control |
| VLSGPQAQPAGDKAEFIEK        | NH2-VLSGPQAQPAGDKAEFIEK-COOH    | * Midlog 1st control |
| EGFQPTETQPR                | NH2-EGFQPTETQPR-COOH            | * Midlog 1st control |
| GLEEDA EGLR                | NH2-GLEEDA EGLR-COOH            | * Midlog 1st control |
| SVFNSAGLEVR                | NH2-SVFNSAGLEVR-COOH            | * Midlog 1st control |
| VAADFLAK                   | NH2-VAADFLAK-COOH               | * Midlog 1st control |
| VGACTLVAADSETVDR           | NH2-VGAC<Cmm*>TLVAADSETVDR-C    | * Midlog 1st control |
| INAEDPNTFLPSPGK            | NH2-INAEDPNTFLPSPGK-COOH        | *                    |
| LICYGENR                   | NH2-LIC<Cmm*>YGENR-COOH         | *                    |
| NALQELIIDGIK               | NH2-NALQELIIDGIK-COOH           | *                    |
| SGFIFIGPK                  | NH2-SGFIFIGPK-COOH              | *                    |
| TNVDLQIR                   | NH2-TNVDLQIR-COOH               | *                    |
| VVEEAPAPGITPELR            | NH2-VVEEAPAPGITPELR-COOH        | *                    |
| AmDVYCHR                   | NH2-AM<Mox>DVYC<Cmm*>HR-COC     | *                    |
| AMDVYCHR                   | NH2-AMDVYC<Cmm*>HR-COOH         | *                    |
| CVDTSMGLT PLEGLVMGTR       | NH2-C<Cmm*>VDTSMGLT PLEGLVMG    | *                    |
| DAASFAPLHNP AHLIGIEEALK    | NH2-DAASFAPLHNP AHLIGIEEALK-COC | *                    |
| EGTRPAVVIPTNEELVIAQDASR    | NH2-EGTRPAVVIPTNEELVIAQDASR-CC  | * Midlog 1st control |
| ESGLLGLTEVTSDCR            | NH2-ESGLLGLTEVTSDC<Cmm*>R-COC   | * Midlog 1st control |
| FAIIDAVNGEEYLSGLAECFHLPEAR | NH2-FAIIDAVNGEEYLSGLAEC<Cmm*>   | *                    |
| LDAVVFTGGIGENAAMVR         | NH2-LDAVVFTGGIGENAAMVR-COOH     | *                    |
| LGVLGFEVDHER               | NH2-LGVLGFEVDHER-COOH           | * Midlog 1st control |
| LVLV LNCGSSSLK             | NH2-LVLV LNC<Cmm*>GSSSLK-COOH   | * Midlog 1st control |
| mLNKPVEELNIITCHLGNGGSVSA   | NH2-M<Mox>LNKPVEELNIITC<Cmm*    | *                    |
| SGDIDPAIIFHLHDTLGM SVDAINK | NH2-SGDIDPAIIFHLHDTLGM<Mox>SV   | *                    |
| YGAHGTS HFYVTQEAAK         | NH2-YGAHGTS HFYVTQEAAK-COOH     | *                    |
| YIGAYTALMDGR               | NH2-YIGAYTALMDGR-COOH           | *                    |
| YTSSVIDESVIQGIK            | NH2-YTSSVIDESVIQGIK-COOH        | *                    |
| YVEDNYATK                  | NH2-YVEDNYATK-COOH              | *                    |
| AGFLAAIAK                  | NH2-AGFLAAIAK-COOH              | *                    |
| DLVHAIPLYAIK               | NH2-DLVHAIPLYAIK-COOH           | *                    |
| EGIEPDQPGVVGPIK            | NH2-EGIEPDQPGVVGPIK-COOH        | *                    |
| GFPLAYVGDVVG TGSSR         | NH2-GFPLAYVGDVVG TGSSR-COOH     | *                    |
| GGGLCLGGK                  | NH2-GGGLC<Cmm*>LGGK-COOH        | *                    |
| GGVSLRPGDGVHISWLN R        | NH2-GGVSLRPGDGVHISWLN R-COOH    | *                    |
| LTVTVFK                    | NH2-LTVTVFK-COOH                | *                    |
| QIEALQQK                   | NH2-QIEALQQK-COOH               | *                    |

|                            |                                |                      |
|----------------------------|--------------------------------|----------------------|
| SPLLTPEK                   | NH2-SPLLTPEK-COOH              | *                    |
| VADGATVVSTSTR              | NH2-VADGATVVSTSTR-COOH         | *                    |
| VAFENIEDAAR                | NH2-VAFENIEDAAR-COOH           | *                    |
| AAQYVASHPGEVCPAK           | NH2-AAQYVASHPGEVC<Cmm*>PAK-C   | *                    |
| ATFVVDPPQGIIQAEVTAEGIGR    | NH2-ATFVVDPPQGIIQAEVTAEGIGR-CO | *                    |
| AWHSSSETIAK                | NH2-AWHSSSETIAK-COOH           | *                    |
| DASDLLR                    | NH2-DASDLLR-COOH               | *                    |
| EGEATLAPSLDLVGKI           | NH2-EGEATLAPSLDLVGKI-COOH      | *                    |
| IKYAmIGDPTGALTR            | NH2-IKYAM<Mox>IGDPTGALTR-COOH  | *                    |
| LGVDVYAVSTDTHFTHK          | NH2-LGVDVYAVSTDTHFTHK-COOH     | *                    |
| NFDNmREDEGLADR             | NH2-NFDNM<Mox>REDEGLADR-COO    | *                    |
| NGEFIEITEK                 | NH2-NGEFIEITEK-COOH            | *                    |
| NGEFIEITEKDTEGR            | NH2-NGEFIEITEKDTEGR-COOH       | *                    |
| WKEGATLAPSLDLVGKI          | NH2-WKEGATLAPSLDLVGKI-COOH     | *                    |
| YAmIGDPTGALTR              | NH2-YAM<Mox>IGDPTGALTR-COOH    | *                    |
| YAMIGDPTGALTR              | NH2-YAMIGDPTGALTR-COOH         | *                    |
| ASLSAFDYLR                 | NH2-ASLSAFDYLR-COOH            | *                    |
| EGLLEPLAVTER               | NH2-EGLLEPLAVTER-COOH          | *                    |
| FGGTSVANAER                | NH2-FGGTSVANAER-COOH           | *                    |
| GHNVTVIDPVEK               | NH2-GHNVTVIDPVEK-COOH          | *                    |
| GmVGMaAR                   | NH2-GM<Mox>VGM<Mox>AAR-COO     | *                    |
| GYGAGNDVTAAGVFADLLR        | NH2-GYGAGNDVTAAGVFADLLR-COOH   | *                    |
| LAIISVVDGDMR               | NH2-LAIISVVDGDMR-COOH          | *                    |
| TITPIAQFQIPCLIK            | NH2-TITPIAQFQIPC<Cmm*>LIK-COOH | *                    |
| AEPDIAALAELAALQLLPR        | NH2-AEPDIAALAELAALQLLPR-COOH   | *                    |
| EVFGVLEPFNIR               | NH2-EVFGVLEPFNIR-COOH          | *                    |
| GFLAEVFGILAR               | NH2-GFLAEVFGILAR-COOH          | *                    |
| AFQELNAIDVL                | NH2-AFQELNAIDVL-COOH           | * Midlog 1st control |
| ANEAYLQGQLGNPK             | NH2-ANEAYLQGQLGNPK-COOH        | * Midlog 1st control |
| APVIVQFSNGGASFIAGK         | NH2-APVIVQFSNGGASFIAGK-COOH    | * Midlog 1st control |
| DSQEYVSK                   | NH2-DSQEYVSK-COOH              | * Midlog 1st control |
| DSVSYGVVK                  | NH2-DSVSYGVVK-COOH             | * Midlog 1st control |
| ENNFALPAVNCVGTDSINAVLETAAI | NH2-ENNFALPAVNC<Cmm*>VGTDSIN   | * Midlog 1st control |
| FTIAASFGNVHGVYKPGNVVLTPTIL | NH2-FTIAASFGNVHGVYKPGNVVLTPTI  | *                    |
| IFDFVKPGVITGDDVQK          | NH2-IFDFVKPGVITGDDVQK-COOH     | * Midlog 1st control |
| KLLPWIDGLLDAGEK            | NH2-KLLPWIDGLLDAGEK-COOH       | *                    |
| LLPWIDGLLDAGEK             | NH2-LLPWIDGLLDAGEK-COOH        | * Midlog 1st control |
| SKIFDFVKPGVITGDDVQK        | NH2-SKIFDFVKPGVITGDDVQK-COOH   | * Midlog 1st control |
| VFQVAK                     | NH2-VFQVAK-COOH                | * Midlog 1st control |
| VKAPVIVQFSNGGASFIAGK       | NH2-VKAPVIVQFSNGGASFIAGK-COOH  | * Midlog 1st control |
| AGGMGLILGR                 | NH2-AGGMGLILGR-COOH            | *                    |
| AGLINSGGAAGGETDLSDAVR      | NH2-AGLINSGGAAGGETDLSDAVR-CO   | *                    |
| AINYGYTDDR                 | NH2-AINYGYTDDR-COOH            | *                    |
| AINYGYTDDRVYSK             | NH2-AINYGYTDDRVYSK-COOH        | *                    |
| DADNLLQHR                  | NH2-DADNLLQHR-COOH             | *                    |
| DGVDYHVSADLTGQANHLAATIGA   | NH2-DGVDYHVSADLTGQANHLAATIGA   | *                    |
| LAGTGYSILPVDQGVVHSAGASFAA  | NH2-LAGTGYSILPVDQGVVHSAGASFA   | *                    |
| LINAVQDVYLDK               | NH2-LINAVQDVYLDK-COOH          | *                    |

|                            |                               |   |                    |
|----------------------------|-------------------------------|---|--------------------|
| LTSENPIDLVR                | NH2-LTSENPIDLVR-COOH          | * |                    |
| NIVELAIEAGCNCVASTYGVLASVSR | NH2-NIVELAIEAGC<Cmm*>NC<Cmm*  | * |                    |
| NmQTLYNTGR                 | NH2-NM<Mox>QTLYNTGR-COOH      | * |                    |
| QIEEISAAFER                | NH2-QIEEISAAFER-COOH          | * |                    |
| TDIAQLLGK                  | NH2-TDIAQLLGK-COOH            | * |                    |
| VMIDNNRPPAVLR              | NH2-VMIDNNRPPAVLR-COOH        | * |                    |
| YQLANCYMGR                 | NH2-YQLANC<Cmm*>YMGR-COOH     | * |                    |
| TSAESILTTGPVVPVIVVK        | NH2-TSAESILTTGPVVPVIVVK-COOH  | * | Midlog 1st control |
| DFTQQLENDmR                | NH2-DFTQQLENDM<Mox>R-COOH     | * | Midlog 1st control |
| DTVYAFSR                   | NH2-DTVYAFSR-COOH             | * | Midlog 1st control |
| ELVATLTELCER               | NH2-ELVATLTELC<Cmm*>ER-COOH   | * | Midlog 1st control |
| ELVATLTELCEREK             | NH2-ELVATLTELC<Cmm*>EREK-COOH | * | Midlog 1st control |
| FDEVGNLYGR                 | NH2-FDEVGNLYGR-COOH           | * | Midlog 1st control |
| FPYVFWGSK                  | NH2-FPYVFWGSK-COOH            | * | Midlog 1st control |
| GNSFVDAMK                  | NH2-GNSFVDAMK-COOH            | * | Midlog 1st control |
| LLYSPEWLETQQQFK            | NH2-LLYSPEWLETQQQFK-COOH      | * | Midlog 1st control |
| mGDPLVLTFGK                | NH2-M<Mox>GDPLVLTFGK-COOH     | * | Midlog 1st control |
| MGDPLVLTFGK                | NH2-MGDPLVLTFGK-COOH          | * | Midlog 1st control |
| NIFGLANPDDVR               | NH2-NIFGLANPDDVR-COOH         | * | Midlog 1st control |
| RDTVYAFSR                  | NH2-RDTVYAFSR-COOH            | * | Midlog 1st control |
| TLALmLYQLAWQK              | NH2-TLALM<Mox>LYQLAWQK-COOH   | * | Midlog 1st control |
| TNITDLAEGVK                | NH2-TNITDLAEGVK-COOH          | * | Midlog 1st control |
| TTFTIDCR                   | NH2-TTFTIDC<Cmm*>R-COOH       | * | Midlog 1st control |
| VEPRPNTVNVVPGK             | NH2-VEPRPNTVNVVPGK-COOH       | * | Midlog 1st control |
| VPTCmIFIPSINGISHNPAER      | NH2-VPTC<Cmm*>M<Mox>IFIPSINGI | * |                    |
| VEIAHK                     | NH2-VEIAHK-COOH               | * |                    |
| FVEAEGFSVVR                | NH2-FVEAEGFSVVR-COOH          | * |                    |
| ITQESLYLALR                | NH2-ITQESLYLALR-COOH          | * |                    |
| KDDTIPAIISHDE              | NH2-KDDTIPAIISHDE-COOH        | * |                    |
| EVALELYVDR                 | NH2-EVALELYVDR-COOH           | * | Midlog 1st control |
| GLENLSGDLYEK               | NH2-GLENLSGDLYEK-COOH         | * | Midlog 1st control |
| LIEPLIR                    | NH2-LIEPLIR-COOH              | * | Midlog 1st control |
| TVVTAVSQAVR                | NH2-TVVTAVSQAVR-COOH          | * | Midlog 1st control |
| WDAAQSLLATYIK              | NH2-WDAAQSLLATYIK-COOH        | * |                    |
| GFLFGAPVALGLGVGFVPVR       | NH2-GFLFGAPVALGLGVGFVPVR-COO  | * |                    |
| QGITSYSLVFPFGH             | NH2-QGITSYSLVFPFGH-COOH       | * |                    |
| TATAQQLEYLK                | NH2-TATAQQLEYLK-COOH          | * | Midlog 1st control |
| VLVVDDLLATGGTIEATVK        | NH2-VLVVDDLLATGGTIEATVK-COOH  | * | Midlog 1st control |
| EQANVALmFLTGR              | NH2-EQANVALM<Mox>FLTGR-COOH   | * |                    |
| EQANVALMFLTGR              | NH2-EQANVALMFLTGR-COOH        | * |                    |
| FNGWELDINSR                | NH2-FNGWELDINSR-COOH          | * |                    |
| MQTPHILIVEDELVTR           | NH2-MQTPHILIVEDELVTR-COOH     | * |                    |
| NGLLAR                     | NH2-NGLLAR-COOH               | * |                    |
| SLIGPDGEQYKLPR             | NH2-SLIGPDGEQYKLPR-COOH       | * |                    |
| TmNLGTVSEER                | NH2-TM<Mox>NLGTVSEER-COOH     | * |                    |
| TmNLGTVSEERR               | NH2-TM<Mox>NLGTVSEERR-COOH    | * |                    |
| TMNLGTVSEER                | NH2-TMNLGTVSEER-COOH          | * |                    |
| TMNLGTVSEERR               | NH2-TMNLGTVSEERR-COOH         | * |                    |

|                       |                                 |   |
|-----------------------|---------------------------------|---|
| TVDVTIR               | NH2-TVDVTIR-COOH                | * |
| IAEmTAAK              | NH2-IAEM<Mox>TAAK-COOH          | * |
| VTPADQIDIITGALAGTANK  | NH2-VTPADQIDIITGALAGTANK-COOH   | * |
| VTQLDEELGHVGLAQPSPK   | NH2-VTQLDEELGHVGLAQPSPK-COOH    | * |
| LGQFSSAETQR           | NH2-LGQFSSAETQR-COOH            | * |
| LILPLAIGK             | NH2-LILPLAIGK-COOH              | * |
| SLAVLDTVFTALLQKPHGR   | NH2-SLAVLDTVFTALLQKPHGR-COOH    | * |
| QLDVPVLLSNVLIAR       | NH2-QLDVPVLLSNVLIAR-COOH        | * |
| SPVFLGNPIHDSEK        | NH2-SPVFLGNPIHDSEK-COOH         | * |
| ERAIK                 | NH2-ERAIK-COOH                  | * |
| VGIVYNYANASDLPAK      | NH2-VGIVYNYANASDLPAK-COOH       | * |
| VPTGATTQDAEVDDAK      | NH2-VPTGATTQDAEVDDAK-COOH       | * |
| AVDSMIPIGR            | NH2-AVDSMIPIGR-COOH             | * |
| ELIIGDR               | NH2-ELIIGDR-COOH                | * |
| GYLADVLSK             | NH2-GYLADVLSK-COOH              | * |
| ILEVPVGR              | NH2-ILEVPVGR-COOH               | * |
| QSVDPVQTYGK           | NH2-QSVDPVQTYGK-COOH            | * |
| TALAIIDAIINQR         | NH2-TALAIIDAIINQR-COOH          | * |
| VNAEYVEAFTKGEVK       | NH2-VNAEYVEAFTKGEVK-COOH        | * |
| YAIALNLER             | NH2-YAIALNLER-COOH              | * |
| FLSQPFVAEFTGSPGK      | NH2-FLSQPFVAEFTGSPGK-COOH       | * |
| GLDVKDLEHPIEVPVGK     | NH2-GLDVKDLEHPIEVPVGK-COOH      | * |
| GVQSILQR              | NH2-GVQSILQR-COOH               | * |
| LVLEVQQQLGGGIVR       | NH2-LVLEVQQQLGGGIVR-COOH        | * |
| NIAIEHSGYSVFAGVGER    | NH2-NIAIEHSGYSVFAGVGER-COOH     | * |
| QIASLGIYPAVDPLDSTR    | NH2-QIASLGIYPAVDPLDSTR-COOH     | * |
| QLDPLVVGQEHYDTAR      | NH2-QLDPLVVGQEHYDTAR-COOH       | * |
| TVNmELIR              | NH2-TVNM<Mox>M<Mox>ELIR-COOH    | * |
| VALTGLTMAEK           | NH2-VALTGLTM<Mox>AEK-COOH       | * |
| VALTGLTMAEK           | NH2-VALTGLTMAEK-COOH            | * |
| VGLFGGAGVGK           | NH2-VGLFGGAGVGK-COOH            | * |
| YTLAGTEVSALLGR        | NH2-YTLAGTEVSALLGR-COOH         | * |
| RGALIK                | NH2-RGALIK-COOH                 | * |
| VSGMDCAACAR           | NH2-VSGMDC<Cmm*>AAC<Cmm*>A      | * |
| YVFTDVQLR             | NH2-YVFTDVQLR-COOH              | * |
| ALTGGTMTLSATLTTR      | NH2-ALTGGTMTLSATLTTR-COOH       | * |
| EGILLIADEIATGFGR      | NH2-EGILLIADEIATGFGR-COOH       | * |
| GYLPENLFAPAPQSR       | NH2-GYLPENLFAPAPQSR-COOH        | * |
| LFACAEIAPDILCLGK      | NH2-LFAC<Cmm*>EAEIAPDILC<Cmm*>  | * |
| LIYLMPPYIILPQQLQR     | NH2-LIYLM<Mox>PPYIILPQQLQR-COOH | * |
| LIYLMPPYIILPQQLQR     | NH2-LIYLMPPYIILPQQLQR-COOH      | * |
| VLGAIGVVETTHPVNMAALQK | NH2-VLGAIGVVETTHPVNMAALQK-COOH  | * |
| ALLQALASQK            | NH2-ALLQALASQK-COOH             | * |
| FFITGDTSVGK           | NH2-FFITGDTSVGK-COOH            | * |
| INPGLAHYAEIIDVLGK     | NH2-INPGLAHYAEIIDVLGK-COOH      | * |
| KLPAPLIGELPYLPR       | NH2-KLPAPLIGELPYLPR-COOH        | * |
| LPAPLIGELPYLPR        | NH2-LPAPLIGELPYLPR-COOH         | * |
| TVAGYKPAK             | NH2-TVAGYKPAK-COOH              | * |



|                           |                                 |   |                    |
|---------------------------|---------------------------------|---|--------------------|
| ADAPLIQWDATSATLK          | NH2-ADAPLIQWDATSATLK-COOH       | * | Midlog 1st control |
| ALGCHSIDR                 | NH2-ALGC<Cmm*>HSIDR-COOH        | * |                    |
| QFmNELNSGLDLR             | NH2-QFM<Mox>NELNSGLDLR-COOH     | * |                    |
| QFMNELNSGLDLR             | NH2-QFMNELNSGLDLR-COOH          | * |                    |
| SATGLDEDALAFALLPLAAACAR   | NH2-SATGLDEDALAFALLPLAAAC<Cmm*> | * |                    |
| SPSGVALECK                | NH2-SPSGVALEC<Cmm*>K-COOH       | * |                    |
| SPSGVALECKDGR             | NH2-SPSGVALEC<Cmm*>KDGR-COOH    | * |                    |
| TLLmDEQDHGYALTGDALSQAAl   | NH2-TLLM<Mox>DEQDHGYALTGDAL     | * |                    |
| TLLMDEQDHGYALTGDALSQAAlAA | NH2-TLLMDEQDHGYALTGDALSQAAlAA   | * |                    |
| TPLSNFNVGAIAR             | NH2-TPLSNFNVGAIAR-COOH          | * | Midlog 1st control |
| SAGGIVLTGSAAAK            | NH2-SAGGIVLTGSAAAK-COOH         | * |                    |
| AAVEEGVVAGGGVALIR         | NH2-AAVEEGVVAGGGVALIR-COOH      | * |                    |
| AIAQVGTISANSDETVGK        | NH2-AIAQVGTISANSDETVGK-COOH     | * |                    |
| ALSVPCSDSK                | NH2-ALSVPC<Cmm*>SDSK-COOH       | * |                    |
| AmEAPLR                   | NH2-AM<Mox>EAPLR-COOH           | * |                    |
| ANDAAGDGTTTATVLAQAIITEGLK | NH2-ANDAAGDGTTTATVLAQAIITEGLK   | * |                    |
| ARVEDALHATR               | NH2-ARVEDALHATR-COOH            | * |                    |
| ATLEDLGQAK                | NH2-ATLEDLGQAK-COOH             | * |                    |
| AVTAAVEELK                | NH2-AVTAAVEELK-COOH             | * |                    |
| EMLPVLEAVAK               | NH2-EMLPVLEAVAK-COOH            | * |                    |
| GQNEDQNVGIK               | NH2-GQNEDQNVGIK-COOH            | * |                    |
| GVNVLADAVK                | NH2-GNVNLADAVK-COOH             | * |                    |
| LIAEAmDK                  | NH2-LIAEAM<Mox>DK-COOH          | * |                    |
| QIVLNCGEEPSVVANTVK        | NH2-QIVLNC<Cmm*>GEEPSVVANTVK    | * |                    |
| QQIEEATSDYDREK            | NH2-QQIEEATSDYDREK-COOH         | * |                    |
| VEDALHATR                 | NH2-VEDALHATR-COOH              | * |                    |
| VGAATEVEmK                | NH2-VGAATEVEM<Mox>K-COOH        | * |                    |
| VGAATEVEmKEK              | NH2-VGAATEVEM<Mox>KEK-COOH      | * |                    |
| VGAATEVEMK                | NH2-VGAATEVEMK-COOH             | * |                    |
| GTLGQDVIDIR               | NH2-GTLGQDVIDIR-COOH            | * |                    |
| AIDLIDEAASSIR             | NH2-AIDLIDEAASSIR-COOH          | * |                    |
| GGESVNDQGAEDQR            | NH2-GGESVNDQGAEDQR-COOH         | * |                    |
| IINGEVPEGLK               | NH2-IINGEVPEGLK-COOH            | * |                    |
| LEVNEDRIVAVQ              | NH2-LEVNEDRIVAVQ-COOH           | * |                    |
| QLEAATQLEGK               | NH2-QLEAATQLEGK-COOH            | * |                    |
| TAIVEGLAQR                | NH2-TAIVEGLAQR-COOH             | * |                    |
| VFVAEPSVEDTIAILR          | NH2-VFVAEPSVEDTIAILR-COOH       | * |                    |
| VIGQNEAVDAVSNAIR          | NH2-VIGQNEAVDAVSNAIR-COOH       | * |                    |
| VLALDMGALVAGAK            | NH2-VLALDMGALVAGAK-COOH         | * |                    |
| EEIYQR                    | NH2-EEIYQR-COOH                 | * |                    |
| EVSVHREEIYQR              | NH2-EVSVHREEIYQR-COOH           | * |                    |
| IGVNAPK                   | NH2-IGVNAPK-COOH                | * |                    |
| AEEIVASNPEK               | NH2-AEEIVASNPEK-COOH            | * |                    |
| ALGANLVLTEGAK             | NH2-ALGANLVLTEGAK-COOH          | * | Midlog 1st control |
| IQGIGAGFIPANLDLK          | NH2-IQGIGAGFIPANLDLK-COOH       | * |                    |
| LQEDESFTNK                | NH2-LQEDESFTNK-COOH             | * |                    |
| NIVVILPSSGER              | NH2-NIVVILPSSGER-COOH           | * | Midlog 1st control |
| VIGITNEEAISTAR            | NH2-VIGITNEEAISTAR-COOH         | * | Midlog 1st control |

|                             |                                 |   |                    |
|-----------------------------|---------------------------------|---|--------------------|
| AVNLLK                      | NH2-AVNLLK-COOH                 | * |                    |
| EAVNQVIALLDGALR             | NH2-EAVNQVIALLDGALR-COOH        | * |                    |
| FADYDEAR                    | NH2-FADYDEAR-COOH               | * |                    |
| MQQLQNIETAFER               | NH2-MQQLQNIETAFER-COOH          | * |                    |
| VGINELLR                    | NH2-VGINELLR-COOH               | * |                    |
| AALESTLAAITESLK             | NH2-AALESTLAAITESLK-COOH        | * |                    |
| EGDAVQLVGFGTK               | NH2-EGDAVQLVGFGTK-COOH          | * |                    |
| IAAANVPFVSGK                | NH2-IAAANVPFVSGK-COOH           | * | Midlog 1st control |
| TQLIDVIAEKAELSK             | NH2-TQLIDVIAEKAELSK-COOH        | * |                    |
| TQLIDVIAEK                  | NH2-TQLIDVIAEK-COOH             | * |                    |
| ALDAIIASVTESLK              | NH2-ALDAIIASVTESLK-COOH         | * |                    |
| EGDDVALVGFGTFAVK            | NH2-EGDDVALVGFGTFAVK-COOH       | * |                    |
| EITIAAAK                    | NH2-EITIAAAK-COOH               | * |                    |
| IAAGADISK                   | NH2-IAAGADISK-COOH              | * |                    |
| NPQTGKEITIAAAK              | NH2-NPQTGKEITIAAAK-COOH         | * |                    |
| SQLIDK                      | NH2-SQLIDK-COOH                 | * |                    |
| SQLIDKIAAGADISK             | NH2-SQLIDKIAAGADISK-COOH        | * |                    |
| DAGLNIAPFITLTR              | NH2-DAGLNIAPFITLTR-COOH         | * |                    |
| LIELALER                    | NH2-LIELALER-COOH               | * |                    |
| LVLINPELLEK                 | NH2-LVLINPELLEK-COOH            | * |                    |
| SVLQVLHIPDER                | NH2-SVLQVLHIPDER-COOH           | * |                    |
| GAFVSQVLPNSSAAK             | NH2-GAFVSQVLPNSSAAK-COOH        | * |                    |
| AFIMVLDSFGIGATEDAER         | NH2-AFIMVLDSFGIGATEDAER-COOH    | * |                    |
| ATGLDALFDATIK               | NH2-ATGLDALFDATIK-COOH          | * | Midlog 1st control |
| DVAGYAAGLELFDK              | NH2-DVAGYAAGLELFDK-COOH         | * | Midlog 1st control |
| EHIPVLVYGPK                 | NH2-EHIPVLVYGPK-COOH            | * | Midlog 1st control |
| ETFADIGQTLAK                | NH2-ETFADIGQTLAK-COOH           | * | Midlog 1st control |
| FGDVGADTLGHIAEACAK          | NH2-FGDVGADTLGHIAEAC<Cmm*>A     | * | Midlog 1st control |
| GPLNLPNLTR                  | NH2-GPLNLPNLTR-COOH             | * | Midlog 1st control |
| IADIYANCGITK                | NH2-IADIYANC<Cmm*>GITK-COOH     | * | Midlog 1st control |
| KGPLNLPNLTR                 | NH2-KGPLNLPNLTR-COOH            | * | Midlog 1st control |
| TGNRHDLAVEPPAPTQLK          | NH2-TGNRHDLAVEPPAPTQLK-COOH     | * |                    |
| VIARPFIDK                   | NH2-VIARPFIDK-COOH              | * | Midlog 1st control |
| YFGTSDmEYGK                 | NH2-YFGTSDM<Mox>EYGK-COOH       | * | Midlog 1st control |
| FGASSLLASLLK                | NH2-FGASSLLASLLK-COOH           | * |                    |
| TPVGNTAAICIYPR              | NH2-TPVGNTAAIC<Cmm*>IYPR-COOH   | * |                    |
| ALTICTVSDHIR                | NH2-ALTIC<Cmm*>TVSDHIR-COOH     | * | Midlog 1st control |
| GmLGFTGTYK                  | NH2-GM<Mox>LGFTGTYK-COOH        | * | Midlog 1st control |
| IALESVLLGDKE                | NH2-IALESVLLGDKE-COOH           | * | Midlog 1st control |
| QTTFNdmIK                   | NH2-QTTFNDM<Mox>IK-COOH         | * |                    |
| QTTFNMIK                    | NH2-QTTFNMIK-COOH               | * |                    |
| VGSCGAVLPHVK                | NH2-VGSC<Cmm*>GAVLPHVK-COOH     | * |                    |
| YIAETFLEDAR                 | NH2-YIAETFLEDAR-COOH            | * | Midlog 1st control |
| LINDVQDVLDEQLAGLAK          | NH2-LINDVQDVLDEQLAGLAK-COOH     | * |                    |
| GICLSAGSPVSHSALIAR          | NH2-GIC<Cmm*>LSAGSPVSHSALIAR-   | * |                    |
| IAIAAGIDDPQNPIGTDAVK        | NH2-IAIAAGIDDPQNPIGTDAVK-COOH   | * |                    |
| LGEVVGELAR                  | NH2-LGEVVGELAR-COOH             | * |                    |
| QLAEDNFGETE EVAPPTLRPVPPVSC | NH2-QLAEDNFGETE EVAPPTLRPVPPVSC | * |                    |

|                              |                                  |                      |
|------------------------------|----------------------------------|----------------------|
| QmLmSDSCK                    | NH2-QM<Mox>LM<Mox>SDSC<Cmm*      | *                    |
| YIDVDDLLHR                   | NH2-YIDVDDLLHR-COOH              | *                    |
| AGVEVDDR                     | NH2-AGVEVDDR-COOH                | *                    |
| AGVEVDDRGFIR                 | NH2-AGVEVDDRGFIR-COOH            | * Midlog 1st control |
| AIASDCADGmTK                 | NH2-AIASDC<Cmm*>ADGM<Mox>TK      | *                    |
| AIASDCADGMTK                 | NH2-AIASDC<Cmm*>ADGMTK-COOH      | * Midlog 1st control |
| ALAEHGIVFGEPK                | NH2-ALAEHGIVFGEPK-COOH           | * Midlog 1st control |
| APAEPQRYDAVLVAIGR            | NH2-APAEPQRYDAVLVAIGR-COOH       | * Midlog 1st control |
| CADLGLETVIVER                | NH2-C<Cmm*>ADLGLETVIVER-COOH     | *                    |
| EDGIYVTmEGK                  | NH2-EDGIYVTM<Mox>EGK-COOH        | * Midlog 1st control |
| EDGIYVTmEGKK                 | NH2-EDGIYVTM<Mox>EGKK-COOH       | *                    |
| EDGIYVTMEGK                  | NH2-EDGIYVTMEGK-COOH             | *                    |
| EDGIYVTMEGKK                 | NH2-EDGIYVTMEGKK-COOH            | *                    |
| EKGISYETATFPWAASGR           | NH2-EKGISYETATFPWAASGR-COOH      | *                    |
| EKVINQLTGGLAGmAK             | NH2-EKVINQLTGGLAGM<Mox>AK-COOH   | *                    |
| EKVINQLTGGLAGMAK             | NH2-EKVINQLTGGLAGMAK-COOH        | *                    |
| FNLmLETK                     | NH2-FNLM<Mox>LETK-COOH           | * Midlog 1st control |
| FNLMLETK                     | NH2-FNLMLETK-COOH                | * Midlog 1st control |
| FTGANTLEVEGENGK              | NH2-FTGANTLEVEGENGK-COOH         | * Midlog 1st control |
| FTGANTLEVEGENGKTVINFDNAIIA   | NH2-FTGANTLEVEGENGKTVINFDNAIIA   | *                    |
| GISYETATFPWAASGR             | NH2-GISYETATFPWAASGR-COOH        | * Midlog 1st control |
| GVHEGHVAAEVIAGK              | NH2-GVHEGHVAAEVIAGK-COOH         | *                    |
| GVHEGHVAAEVIAGKK             | NH2-GVHEGHVAAEVIAGKK-COOH        | *                    |
| HYFDPK                       | NH2-HYFDPK-COOH                  | *                    |
| IWDSTDALELK                  | NH2-IWDSTDALELK-COOH             | * Midlog 1st control |
| IWDSTDALELKEVPER             | NH2-IWDSTDALELKEVPER-COOH        | * Midlog 1st control |
| KAPAEPQRYDAVLVAIGR           | NH2-KAPAEPQRYDAVLVAIGR-COOH      | *                    |
| KFNLmLETK                    | NH2-KFNLM<Mox>LETK-COOH          | * Midlog 1st control |
| KFNLMLETK                    | NH2-KFNLMLETK-COOH               | * Midlog 1st control |
| LIFDKESHR                    | NH2-LIFDKESHR-COOH               | *                    |
| PIQLPFIPHEDPR                | NH2-PIQLPFIPHEDPR-COOH           | *                    |
| STEIKTQVVVLGAGPAGYSAAFR      | NH2-STEIKTQVVVLGAGPAGYSAAFR-COOH | * Midlog 1st control |
| TDIDKIR                      | NH2-TDIDKIR-COOH                 | *                    |
| TNVPHIFAIGDIVGQPMmLAHK       | NH2-TNVPHIFAIGDIVGQPM<Mox>LAHK   | *                    |
| TNVPHIFAIGDIVGQPMLAHK        | NH2-TNVPHIFAIGDIVGQPMLAHK-COOH   | *                    |
| TQVVVLGAGPAGYSAAFR           | NH2-TQVVVLGAGPAGYSAAFR-COOH      | * Midlog 1st control |
| TVINFDNAIIAAGSR              | NH2-TVINFDNAIIAAGSR-COOH         | * Midlog 1st control |
| TVINFDNAIIAAGSRPIQLPFIPHEDPR | NH2-TVINFDNAIIAAGSRPIQLPFIPHEDPR | *                    |
| VINQLTGGLAGmAK               | NH2-VINQLTGGLAGM<Mox>AK-COOH     | * Midlog 1st control |
| VINQLTGGLAGMAK               | NH2-VINQLTGGLAGMAK-COOH          | * Midlog 1st control |
| VIPSIAYTEPEVAWVGLTEK         | NH2-VIPSIAYTEPEVAWVGLTEK-COOH    | * Midlog 1st control |
| VIPSIAYTEPEVAWVGLTEKEAK      | NH2-VIPSIAYTEPEVAWVGLTEKEAK-COOH | *                    |
| VTAVEAKEDGIYVTmEGK           | NH2-VTAVEAKEDGIYVTM<Mox>EGK-COOH | * Midlog 1st control |
| VTAVEAKEDGIYVTmEGKK          | NH2-VTAVEAKEDGIYVTM<Mox>EGKK     | *                    |
| VTAVEAKEDGIYVTMEGK           | NH2-VTAVEAKEDGIYVTMEGK-COOH      | * Midlog 1st control |
| VTAVEAKEDGIYVTMEGKK          | NH2-VTAVEAKEDGIYVTMEGKK-COOH     | *                    |
| YDAVLVAIGR                   | NH2-YDAVLVAIGR-COOH              | * Midlog 1st control |
| YNTLGGVCLNVGCIPSK            | NH2-YNTLGGVC<Cmm*>LNVGC<Cmm*     | * Midlog 1st control |

|                             |                                    |   |                    |
|-----------------------------|------------------------------------|---|--------------------|
| ESVLFQDSTLALR               | NH2-ESVLFQDSTLALR-COOH             | * |                    |
| FLDVFIK                     | NH2-FLDVFIK-COOH                   | * |                    |
| <QAVTNPQNTLFAIK             | #Gln->pyro-Glu (N-term Q)#-QAVTNP  | * |                    |
| <QAVTNPQNTLFAIKR            | #Gln->pyro-Glu (N-term Q)#-QAVTNP  | * |                    |
| AKIELSSAQQTQDVNLPYITADATGPK | NH2-AKIELSSAQQTQDVNLPYITADATGPK    | * |                    |
| AKLESLVEDLVNR               | NH2-AKLESLVEDLVNR-COOH             | * | Midlog 1st control |
| ASSGLNEDEIQK                | NH2-ASSGLNEDEIQK-COOH              | * | Midlog 1st control |
| DAEANAADRKFEELVQTR          | NH2-DAEANAADRKFEELVQTR-COOH        | * |                    |
| DDDVVDAEFEEVKDKK            | NH2-DDDVVDAEFEEVKDKK-COOH          | * |                    |
| DQGIDLR                     | NH2-DQGIDLR-COOH                   | * |                    |
| DQGIDLRNDPLAmQR             | NH2-DQGIDLRNDPLAM<Mox>QR-COOH      | * |                    |
| DVSImPFK                    | NH2-DVSIM<Mox>PFK-COOH             | * |                    |
| DVSIMPFK                    | NH2-DVSIMPFK-COOH                  | * |                    |
| FEELVQTR                    | NH2-FEELVQTR-COOH                  | * |                    |
| FQDEEVQR                    | NH2-FQDEEVQR-COOH                  | * |                    |
| FQDEEVQRDVSImPFK            | NH2-FQDEEVQRDVSIM<Mox>PFK-COOH     | * |                    |
| FQDEEVQRDVSIMPFK            | NH2-FQDEEVQRDVSIMPFK-COOH          | * |                    |
| GKIIGIDLGTTNSCVAIMDGTTTPR   | NH2-GKIIGIDLGTTNSC<Cmm*>VAIM<Mox>  | * |                    |
| GKIIGIDLGTTNSCVAIMDGTTTPR   | NH2-GKIIGIDLGTTNSC<Cmm*>VAIM<Mox>  | * |                    |
| HSQVFSTAEDNQSAVTIHVLQGER    | NH2-HSQVFSTAEDNQSAVTIHVLQGER       | * |                    |
| IAGLEVK                     | NH2-IAGLEVK-COOH                   | * |                    |
| IAGLEVKR                    | NH2-IAGLEVKR-COOH                  | * |                    |
| IELSSAQQTQDVNLPYITADATGPK   | NH2-IELSSAQQTQDVNLPYITADATGPK-COOH | * |                    |
| IIAADNGDAWVEVK              | NH2-IIAADNGDAWVEVK-COOH            | * | Midlog 1st control |
| IIAADNGDAWVEVKGQK           | NH2-IIAADNGDAWVEVKGQK-COOH         | * |                    |
| IIGIDLGTTNSCVAIMDGTTTPR     | NH2-IIGIDLGTTNSC<Cmm*>VAIM<Mox>    | * |                    |
| IIGIDLGTTNSCVAIMDGTTTPR     | NH2-IIGIDLGTTNSC<Cmm*>VAIMDGTTTPR  | * |                    |
| IINEPTAAALAYGLDK            | NH2-IINEPTAAALAYGLDK-COOH          | * | Midlog 1st control |
| IINEPTAAALAYGLDKGTGNR       | NH2-IINEPTAAALAYGLDKGTGNR-COOH     | * | Midlog 1st control |
| KDVNPDEAVAIGAAGVQGGVLTGDVI  | NH2-KDVNPDEAVAIGAAGVQGGVLTGDVI     | * |                    |
| KFEELVQTR                   | NH2-KFEELVQTR-COOH                 | * |                    |
| KTAEDYLGEVPTEAVITVPAYFNDAQ  | NH2-KTAEDYLGEVPTEAVITVPAYFNDAQ     | * |                    |
| KVAEFFGK                    | NH2-KVAEFFGK-COOH                  | * |                    |
| KVAEFFGKEPR                 | NH2-KVAEFFGKEPR-COOH               | * |                    |
| LESLVEDLVNR                 | NH2-LESLVEDLVNR-COOH               | * | Midlog 1st control |
| LINYLVEEFK                  | NH2-LINYLVEEFK-COOH                | * |                    |
| LINYLVEEFKK                 | NH2-LINYLVEEFKK-COOH               | * | Midlog 1st control |
| LINYLVEEFKKDQGIDLR          | NH2-LINYLVEEFKKDQGIDLR-COOH        | * |                    |
| LmEIAQQQHAQQQTAGADASAM      | NH2-LM<Mox>EIAQQQHAQQQTAGASAM      | * |                    |
| mAPPQISAEVLK                | NH2-M<Mox>APPQISAEVLK-COOH         | * | Midlog 1st control |
| mAPPQISAEVLKK               | NH2-M<Mox>APPQISAEVLKK-COOH        | * |                    |
| mPMVQKK                     | NH2-M<Mox>PMVQKK-COOH              | * |                    |
| mQELAQVSQK                  | NH2-M<Mox>QELAQVSQK-COOH           | * |                    |
| MAPPQISAEVLK                | NH2-MAPPQISAEVLK-COOH              | * |                    |
| MAPPQISAEVLKK               | NH2-MAPPQISAEVLKK-COOH             | * |                    |
| MPMVQKK                     | NH2-MPMVQKK-COOH                   | * |                    |
| MQELAQVSQK                  | NH2-MQELAQVSQK-COOH                | * |                    |

|                             |                                      |   |                    |
|-----------------------------|--------------------------------------|---|--------------------|
| NDPLAmQR                    | NH2-NDPLAM<Mox>QR-COOH               | * |                    |
| NDPLAMQR                    | NH2-NDPLAMQR-COOH                    | * |                    |
| NQGDHLLHSTR                 | NH2-NQGDHLLHSTR-COOH                 | * |                    |
| NTTIPTK                     | NH2-NTTIPTK-COOH                     | * |                    |
| QAVTNPQNTLFAIK              | NH2-QAVTNPQNTLFAIK-COOH              | * | Midlog 1st control |
| QAVTNPQNTLFAIKR             | NH2-QAVTNPQNTLFAIKR-COOH             | * | Midlog 1st control |
| RFQDEEVQR                   | NH2-RFQDEEVQR-COOH                   | * |                    |
| RIINEPTAAALAYGLDK           | NH2-RIINEPTAAALAYGLDK-COOH           | * |                    |
| RIINEPTAAALAYGLDKGTGNR      | NH2-RIINEPTAAALAYGLDKGTGNR-COOH      | * |                    |
| RQAVTNPQNTLFAIK             | NH2-RQAVTNPQNTLFAIK-COOH             | * |                    |
| SIEPLKVALQDAGLSVSDIDDVILVGG | NH2-SIEPLKVALQDAGLSVSDIDDVILVGG      | * |                    |
| SLGQFNLDGINPAPR             | NH2-SLGQFNLDGINPAPR-COOH             | * | Midlog 1st control |
| TAEDYLGEVPTEAVITVPAYFNDAQR  | NH2-TAEDYLGEVPTEAVITVPAYFNDAQR       | * |                    |
| TFEVLATNGDTHLGGEDFDSR       | NH2-TFEVLATNGDTHLGGEDFDSR-COOH       | * |                    |
| TTPSIIAYTQDGETLVGQPAK       | NH2-TTPSIIAYTQDGETLVGQPAK-COOH       | * |                    |
| TTPSIIAYTQDGETLVGQPAKR      | NH2-TTPSIIAYTQDGETLVGQPAKR-COOH      | * |                    |
| VAEFFGK                     | NH2-VAEFFGK-COOH                     | * |                    |
| VAEFFGKEPR                  | NH2-VAEFFGKEPR-COOH                  | * | Midlog 1st control |
| VALQDAGLSVSDIDDVILVGGQTR    | NH2-VALQDAGLSVSDIDDVILVGGQTR-COOH    | * |                    |
| VLENAEGDR                   | NH2-VLENAEGDR-COOH                   | * |                    |
| VLENAEGDRTPSIIAYTQDGETLVG   | NH2-VLENAEGDRTPSIIAYTQDGETLVG        | * |                    |
| VLENAEGDRTPSIIAYTQDGETLVG   | NH2-VLENAEGDRTPSIIAYTQDGETLVG        | * |                    |
| Ac-MKFTVER                  | #Acetyl (Protein N-term)#-MKFTVER-   | * |                    |
| AAILSNEK                    | NH2-AAILSNEK-COOH                    | * |                    |
| AAILSNEKFR                  | NH2-AAILSNEKFR-COOH                  | * |                    |
| AHVGDFIFTSK                 | NH2-AHVGDFIFTSK-COOH                 | * | Midlog 1st control |
| AHVGDFIFTSKLV DGR           | NH2-AHVGDFIFTSKLV DGR-COOH           | * |                    |
| EHLKPLQQVSGPLGGR            | NH2-EHLKPLQQVSGPLGGR-COOH            | * |                    |
| FFDICR                      | NH2-FFDIC<Cmm*>R-COOH                | * |                    |
| FPDYRR                      | NH2-FPDYRR-COOH                      | * |                    |
| FSLSTLPAADFPNLDDWQSEVEFTLP  | NH2-FSLSTLPAADFPNLDDWQSEVEFTLP       | * |                    |
| FSLSTLPAADFPNLDDWQSEVEFTLP  | NH2-FSLSTLPAADFPNLDDWQSEVEFTLP       | * |                    |
| FSLSTLPAADFPNLDDWQSEVEFTLP  | NH2-FSLSTLPAADFPNLDDWQSEVEFTLP       | * |                    |
| FTVEREHLKPLQQVSGPLGGR       | NH2-FTVEREHLKPLQQVSGPLGGR-COOH       | * |                    |
| GLPEGAEIAVQLEGER            | NH2-GLPEGAEIAVQLEGER-COOH            | * | Midlog 1st control |
| GLPEGAEIAVQLEGERmLVR        | NH2-GLPEGAEIAVQLEGERM<Mox>LV         | * |                    |
| GVIELmR                     | NH2-GVIELM<Mox>R-COOH                | * |                    |
| GVIELMR                     | NH2-GVIELMR-COOH                     | * |                    |
| HLEAGCDLLK                  | NH2-HLEAGC<Cmm*>DLLK-COOH            | * |                    |
| KFFDICR                     | NH2-KFFDIC<Cmm*>R-COOH               | * |                    |
| KGVIELmR                    | NH2-KGVIELM<Mox>R-COOH               | * |                    |
| KGVIELMR                    | NH2-KGVIELMR-COOH                    | * |                    |
| LAVCSmPIGQSLPSHSVIVPR       | NH2-LAVC<Cmm*>SM<Mox>PIGQSLPSHSVIVPR | * |                    |
| LAVCSMPIGQSLPSHSVIVPR       | NH2-LAVC<Cmm*>SMPIGQSLPSHSVIVPR      | * |                    |
| LIEATQFSmAHQDVR             | NH2-LIEATQFSM<Mox>AHQDVR-COOH        | * | Midlog 1st control |
| LIEATQFSMAHQDVR             | NH2-LIEATQFSMAHQDVR-COOH             | * |                    |
| LVDGRFPDYR                  | NH2-LVDGRFPDYR-COOH                  | * |                    |
| LYVSENQLK                   | NH2-LYVSENQLK-COOH                   | * | Midlog 1st control |

|                          |                               |   |                    |
|--------------------------|-------------------------------|---|--------------------|
| mKFTVER                  | NH2-M<Mox>KFTVER-COOH         | * |                    |
| mLDGGDNPLR               | NH2-M<Mox>LDGGDNPLR-COOH      | * | Midlog 1st control |
| mLDGGDNPLRVQIGSNIR       | NH2-M<Mox>LDGGDNPLRVQIGSNIR   | * |                    |
| mmLTDSVSSVQIEDAASQSAAYV  | NH2-M<Mox>M<Mox>LTDSVSSVQIE   | * |                    |
| mMLTDSVSSVQIEDAASQSAAYV  | NH2-M<Mox>MLTDSVSSVQIEDAASQ   | * |                    |
| MKFTVER                  | NH2-MKFTVER-COOH              | * |                    |
| MLDGGDNPLR               | NH2-MLDGGDNPLR-COOH           | * |                    |
| MLDGGDNPLRVQIGSNIR       | NH2-MLDGGDNPLRVQIGSNIR-COOH   | * |                    |
| MmLTDSVSSVQIEDAASQSAAYV  | NH2-MM<Mox>LTDSVSSVQIEDAASQ   | * |                    |
| MMLTDSVSSVQIEDAASQSAAYV  | NH2-MMLTDSVSSVQIEDAASQSAAYV   | * |                    |
| NPKHLEAGCDLLK            | NH2-NPKHLEAGC<Cmm*>DLLK-COO   | * |                    |
| NPKHLEAGCDLLKQAFAR       | NH2-NPKHLEAGC<Cmm*>DLLKQAF    | * |                    |
| RLIEATQFSmAHQDVR         | NH2-RLIEATQFSM<Mox>AHQDVR-CO  | * |                    |
| RLIEATQFSMAHQDVR         | NH2-RLIEATQFSMAHQDVR-COOH     | * |                    |
| TVATDGHR                 | NH2-TVATDGHR-COOH             | * |                    |
| VALVQPHEPGATTVPAR        | NH2-VALVQPHEPGATTVPAR-COOH    | * | Midlog 1st control |
| VALVQPHEPGATTVPARK       | NH2-VALVQPHEPGATTVPARK-COOH   | * |                    |
| VLPKNPKHLEAGCDLLK        | NH2-VLPKNPKHLEAGC<Cmm*>DLLK   | * |                    |
| VQIGSNIR                 | NH2-VQIGSNIR-COOH             | * |                    |
| YYLNGmLFETEGEELR         | NH2-YYLNGM<Mox>LFETEGEELR-COC | * |                    |
| YYLNGmLFETEGEELRTVATDGHR | NH2-YYLNGM<Mox>LFETEGEELRTVA  | * |                    |
| YYLNGMLFETEGEELR         | NH2-YYLNGMLFETEGEELR-COOH     | * |                    |
| YYLNGMLFETEGEELRTVATDGHR | NH2-YYLNGMLFETEGEELRTVATDGHR  | * |                    |
| AIGEAKDDDTADILTAASR      | NH2-AIGEAKDDDTADILTAASR-COOH  | * |                    |
| AVQLGGVALGTTQVINSK       | NH2-AVQLGGVALGTTQVINSK-COOH   | * |                    |
| GANFIAVHEMLDGFR          | NH2-GANFIAVHEMLDGFR-COOH      | * |                    |
| QVIQFIDLITK              | NH2-QVIQFIDLITK-COOH          | * |                    |
| SYPLDIHNVQDHLK           | NH2-SYPLDIHNVQDHLK-COOH       | * |                    |



|                            |                                     |   |
|----------------------------|-------------------------------------|---|
| TALIDHLDTMAER              | NH2-TALIDHLDTMAER-COOH              | * |
| YAIVANDVR                  | NH2-YAIVANDVR-COOH                  | * |
| Ac-ARTTPIAR                | #Acetyl (Protein N-term)#-ARTTPIAR- | * |
| <QKVTDVEGK                 | #Gln->pyro-Glu (N-term Q)#-QKVTDV   | * |
| AGDIAAAIGLK                | NH2-AGDIAAAIGLK-COOH                | * |
| AGDIAAAIGLKDVTTGDTLCDPDAPI | NH2-AGDIAAAIGLKDVTTGDTLC<Cmm        | * |
| AGPLAGYPVVDMGIR            | NH2-AGPLAGYPVVDM<Mox>GIR-COC        | * |
| AGPLAGYPVVDMGIR            | NH2-AGPLAGYPVVDMGIR-COOH            | * |
| AKPVLLEPIMK                | NH2-AKPVLLEPIM<Mox>K-COOH           | * |
| AKPVLLEPIMK                | NH2-AKPVLLEPIMK-COOH                | * |
| ASYTMEFLKYDEAPSNVAQAVIEA   | NH2-ASYTM<Mox>EFLKYDEAPSNVAC        | * |
| ASYTMEFLK                  | NH2-ASYTMEFLK-COOH                  | * |
| ASYTMEFLKYDEAPSNVAQAVIEAR  | NH2-ASYTMEFLKYDEAPSNVAQAVIEAR       | * |
| DVTTGDTLCDPDAPIILER        | NH2-DVTTGDTLC<Cmm*>DPDAPIILER       | * |
| EDPSFR                     | NH2-EDPSFR-COOH                     | * |
| EEIKEVR                    | NH2-EEIKEVR-COOH                    | * |
| EFNVEANVGKPVAYR            | NH2-EFNVEANVGKPVAYR-COOH            | * |
| GGVIPGEYIPAVDK             | NH2-GGVIPGEYIPAVDK-COOH             | * |
| GGVIPGEYIPAVDKGIQEQLK      | NH2-GGVIPGEYIPAVDKGIQEQLK-COO       | * |
| GIQEQLK                    | NH2-GIQEQLK-COOH                    | * |
| GITITSAATTAFWSGMMAK        | NH2-GITITSAATTAFWSGM<Mox>AK-C       | * |
| GITITSAATTAFWSGMMAK        | NH2-GITITSAATTAFWSGMMAK-COOH        | * |
| GMLKGQESEVTGVK             | NH2-GM<Mox>LKGQESEVTGVK-COO         | * |
| GMLKGQESEVTGVK             | NH2-GMLKGQESEVTGVK-COOH             | * |
| GQESEVTGVK                 | NH2-GQESEVTGVK-COOH                 | * |
| GQYGHVVIDMYPLEPGSNPK       | NH2-GQYGHVVIDM<Mox>YPLEPGSNI        | * |
| GQYGHVVIDMYPLEPGSNPK       | NH2-GQYGHVVIDMYPLEPGSNPK-COC        | * |
| GYEFINDIK                  | NH2-GYEFINDIK-COOH                  | * |
| HASDDEPFSALAFK             | NH2-HASDDEPFSALAFK-COOH             | * |
| IAFVNK                     | NH2-IAFVNK-COOH                     | * |
| IAFVNKMDR                  | NH2-IAFVNKM<Mox>DR-COOH             | * |
| IATDPFVGNLTFFR             | NH2-IATDPFVGNLTFFR-COOH             | * |
| IGEVHDGAATMDWMEQEQR        | NH2-IGEVHDGAATM<Mox>DWMEQE          | * |
| IGEVHDGAATMDWMEQEQR        | NH2-IGEVHDGAATMDWM<Mox>EQE          | * |
| IGEVHDGAATMDWMEQEQR        | NH2-IGEVHDGAATMDWMEQEQR-C           | * |
| IHAEVPLSEMFGYATQLR         | NH2-IHAEVPLSEM<Mox>FGYATQLR-C       | * |
| IHAEVPLSEMFGYATQLR         | NH2-IHAEVPLSEMFGYATQLR-COOH         | * |
| ILFYTG VNHK                | NH2-ILFYTG VNHK-COOH                | * |
| INIIDTPGHVDFTIEVER         | NH2-INIIDTPGHVDFTIEVER-COOH         | * |
| IVQMHANK                   | NH2-IVQM<Mox>HANK-COOH              | * |
| IVQMHANK                   | NH2-IVQMHANK-COOH                   | * |
| IVQMHANKR                  | NH2-IVQMHANKR-COOH                  | * |
| LAASIAFK                   | NH2-LAASIAFK-COOH                   | * |
| LAKEDPSFR                  | NH2-LAKEDPSFR-COOH                  | * |
| LGANPVPLQLAIGAEHFTGVVDLVK  | NH2-LGANPVPLQLAIGAEHFTGVVDLV        | * |
| LHFGSYHDVDSSELAFK          | NH2-LHFGSYHDVDSSELAFK-COOH          | * |
| MEFPEPVISIAVEPK            | NH2-M<Mox>EFPEPVISIAVEPK-COOH       | * |

|                         |                                   |   |
|-------------------------|-----------------------------------|---|
| mGANFLK                 | NH2-M<Mox>GANFLK-COOH             | * |
| MEFPEPVISIAVEPK         | NH2-MEFPEPVISIAVEPK-COOH          | * |
| NIGISAHIDAGK            | NH2-NIGISAHIDAGK-COOH             | * |
| QKVTDVEGK               | NH2-QKVTDVEGK-COOH                | * |
| VEVETPEENTGDVIGDLSR     | NH2-VEVETPEENTGDVIGDLSR-COOH      | * |
| VLDGAVMVYCAVGGVQPQSETVW | NH2-VLDGAVMVYC<Cmm*>AVGGVQ        | * |
| VLNNEILVTCGSAFK         | NH2-VLNNEILVTC<Cmm*>GSAFK-CO      | * |
| VYSGVVNSGDTVLSVK        | NH2-VYSGVVNSGDTVLSVK-COOH         | * |
| YDEAPSNVAQAVIEAR        | NH2-YDEAPSNVAQAVIEAR-COOH         | * |
| YLGGEELTEAEIK           | NH2-YLGGEELTEAEIK-COOH            | * |
| ATYYSNDFR               | NH2-ATYYSNDFR-COOH                | * |
| GDTAGTGGKPATLSTGAVVK    | NH2-GDTAGTGGKPATLSTGAVVK-COC      | * |
| PATLSTGAVVK             | NH2-PATLSTGAVVK-COOH              | * |
| RLLTGTR                 | NH2-RLLTGTR-COOH                  | * |
| VPLFVQIGEVIK            | NH2-VPLFVQIGEVIK-COOH             | * |
| DIDIQSPTAR              | NH2-DIDIQSPTAR-COOH               | * |
| FKGDDIVDTVTLTR          | NH2-FKGDDIVDTVTLTR-COOH           | * |
| TGLKVEER                | NH2-TGLKVEER-COOH                 | * |
| AEITASLVK               | NH2-AEITASLVK-COOH                | * |
| AGNVAADGVK              | NH2-AGNVAADGVK-COOH               | * |
| ALTEANGDIELAIENMR       | NH2-ALTEANGDIELAIENMR-COOH        | * |
| AQFEEER                 | NH2-AQFEEER-COOH                  | * |
| DAGFQAFADK              | NH2-DAGFQAFADK-COOH               | * |
| DAGFQAFADKVLDAAVAGK     | NH2-DAGFQAFADKVLDAAVAGK-COO       | * |
| EHNAEVTGFIR             | NH2-EHNAEVTGFIR-COOH              | * |
| FEVGEGIEKVETDFAAEVAAMSK | NH2-FEVGEGIEKVETDFAAEVAAM<Moc     | * |
| FTGEVSLTGQPFVMEPSK      | NH2-FTGEVSLTGQPFVM<Mox>EPSK-(     | * |
| FTGEVSLTGQPFVMEPSK      | NH2-FTGEVSLTGQPFVMEPSK-COOH       | * |
| GADEELVK                | NH2-GADEELVK-COOH                 | * |
| IGENINIR                | NH2-IGENINIR-COOH                 | * |
| ITDVEVLK                | NH2-ITDVEVLK-COOH                 | * |
| KAGNVAADGVK             | NH2-KAGNVAADGVK-COOH              | * |
| RVAALEGDVLGSYQHGAR      | NH2-RVAALEGDVLGSYQHGAR-COOH       | * |
| VAALEGDVLGSYQHGAR       | NH2-VAALEGDVLGSYQHGAR-COOH        | * |
| VLDAAVAGK               | NH2-VLDAAVAGK-COOH                | * |
| <QVGVPYIIVFLNK          | #Gln->pyro-Glu (N-term Q)#-QVGVPY | * |
| AFDQIDNAPEEKAR          | NH2-AFDQIDNAPEEKAR-COOH           | * |
| AFDQIDNAPEEK            | NH2-AFDQIDNAPEEK-COOH             | * |
| AGENVGILLR              | NH2-AGENVGILLR-COOH               | * |
| AIDKPFLPIEDVFSISGR      | NH2-AIDKPFLPIEDVFSISGR-COOH       | * |
| ALEGDAEWEAK             | NH2-ALEGDAEWEAK-COOH              | * |
| CDmVDDEELLELVmEVR       | NH2-C<Cmm*>DM<Mox>VDDEELLEL       | * |
| CDmVDDEELLELVEMEVR      | NH2-C<Cmm*>DM<Mox>VDDEELLEL       | * |
| CDMVDDEELLELVmEVR       | NH2-C<Cmm*>DMVDDEELLELVEM<M       | * |
| CDMVDDEELLELVEMEVR      | NH2-C<Cmm*>DMVDDEELLELVEMEVR      | * |
| DEGGR                   | NH2-DEGGR-COOH                    | * |
| EHILLGR                 | NH2-EHILLGR-COOH                  | * |
| ELLSQYDFPGDDTPIVR       | NH2-ELLSQYDFPGDDTPIVR-COOH        | * |



|                          |                                |   |
|--------------------------|--------------------------------|---|
| FESEVYILSK               | NH2-FESEVYILSK-COOH            | * |
| FESEVYILSKDEGGR          | NH2-FESEVYILSKDEGGR-COOH       | * |
| GIIKVGEEVEIVGIKETQK      | NH2-GIIKVGEEVEIVGIKETQK-COOH   | * |
| GITINTSHVEYDTPTR         | NH2-GITINTSHVEYDTPTR-COOH      | * |
| GQVLAKPGTIKPHTK          | NH2-GQVLAKPGTIKPHTK-COOH       | * |
| GTVVTGRVER               | NH2-GTVVTGRVER-COOH            | * |
| GYRPQFYFR                | NH2-GYRPQFYFR-COOH             | * |
| HYAHVDCPGHADYVK          | NH2-HYAHVDC<Cmm*>PGHADYVK-C    | * |
| ILELAGFLDSYIPEPER        | NH2-ILELAGFLDSYIPEPER-COOH     | * |
| KLLDEGR                  | NH2-KLLDEGR-COOH               | * |
| LLDEGR                   | NH2-LLDEGR-COOH                | * |
| mVVTLIHPIAmDDGLR         | NH2-M<Mox>VVTLIHPIAM<Mox>DDGLR | * |
| mVVTLIHPIAMDDGLR         | NH2-M<Mox>VVTLIHPIAMDDGLR-CO   | * |
| MVVTLIHPIAmDDGLR         | NH2-MVVTLIHPIAM<Mox>DDGLR-CO   | * |
| MVVTLIHPIAMDDGLR         | NH2-MVVTLIHPIAMDDGLR-COOH      | * |
| NmITGAAQmDGAILVVAATDGPi  | NH2-NM<Mox>ITGAAQM<Mox>DGA     | * |
| NmITGAAQmDGAILVVAATDGPi  | NH2-NM<Mox>ITGAAQM<Mox>DGA     | * |
| NmITGAAQMDGAILVVAATDGPi  | NH2-NM<Mox>ITGAAQMDGAILVVA     | * |
| NmITGAAQMDGAILVVAATDGPi  | NH2-NM<Mox>ITGAAQMDGAILVVA     | * |
| NMITGAAQmDGAILVVAATDGPn  | NH2-NMITGAAQM<Mox>DGAILVVA     | * |
| NMITGAAQmDGAILVVAATDGPn  | NH2-NMITGAAQM<Mox>DGAILVVA     | * |
| NMITGAAQMDGAILVVAATDGPmI | NH2-NMITGAAQMDGAILVVAATDGPm    | * |
| NMITGAAQMDGAILVVAATDGPmI | NH2-NMITGAAQMDGAILVVAATDGPm    | * |
| PQFYFR                   | NH2-PQFYFR-COOH                | * |
| QVGVPYIIVFLNK            | NH2-QVGVPYIIVFLNK-COOH         | * |
| REEIER                   | NH2-REEIER-COOH                | * |
| STCTGVEmFR               | NH2-STC<Cmm*>TGVEM<Mox>FR-C    | * |
| STCTGVEmFRK              | NH2-STC<Cmm*>TGVEM<Mox>FRK-C   | * |
| STCTGVEmFR               | NH2-STC<Cmm*>TGVEMFR-COOH      | * |
| STCTGVEmFRK              | NH2-STC<Cmm*>TGVEMFRK-COOH     | * |
| TKPHVNVGTIGHVDHGK        | NH2-TKPHVNVGTIGHVDHGK-COOH     | * |
| TTDVTGTIELPEGVEmVMPGDNIK | NH2-TTDVTGTIELPEGVEM<Mox>VM<   | * |
| TTDVTGTIELPEGVEmVMPGDNIK | NH2-TTDVTGTIELPEGVEM<Mox>VMF   | * |
| TTDVTGTIELPEGVEMVMPGDNIK | NH2-TTDVTGTIELPEGVEMVM<Mox>F   | * |
| TTDVTGTIELPEGVEMVMPGDNIK | NH2-TTDVTGTIELPEGVEMVMPGDNIK   | * |
| TTLTAAITTVLAK            | NH2-TTLTAAITTVLAK-COOH         | * |
| TTLTAAITTVLAKTYGGAAR     | NH2-TTLTAAITTVLAKTYGGAAR-COOH  | * |
| TVGAGVVAK                | NH2-TVGAGVVAK-COOH             | * |
| VGEEVEIVGIK              | NH2-VGEEVEIVGIK-COOH           | * |
| VGEEVEIVGIKETQK          | NH2-VGEEVEIVGIKETQK-COOH       | * |
| LDQLAEIVK                | NH2-LDQLAEIVK-COOH             | * |
| AAAAAK                   | NH2-AAAAAK-COOH                | * |
| AAGYELGK                 | NH2-AAGYELGK-COOH              | * |
| AAGYELGKDITLAMDCASEFYK   | NH2-AAGYELGKDITLAMDC<Cmm*>A/   | * |
| AAGYELGKDITLAMDCASEFYKDG | NH2-AAGYELGKDITLAMDC<Cmm*>A/   | * |
| AFTSEEFTHFLEELTK         | NH2-AFTSEEFTHFLEELTK-COOH      | * |
| AVAAVNGPIAQALIGK         | NH2-AVAAVNGPIAQALIGK-COOH      | * |

Midlog 1st control

|                           |                               |   |                    |
|---------------------------|-------------------------------|---|--------------------|
| AVAAVNGPIAQALIGKDAK       | NH2-AVAAVNGPIAQALIGKDAK-COOH  | * |                    |
| DAGYTAVISHR               | NH2-DAGYTAVISHR-COOH          | * | Midlog 1st control |
| DAKDQAGIDKIMIDLDGTENK     | NH2-DAKDQAGIDKIM<Mox>IDLDGTE  | * |                    |
| DITLAMDCAASEFYK           | NH2-DITLAMDC<Cmm*>AASEFYK-CO  | * |                    |
| DQAGIDKIMIDLDGTENK        | NH2-DQAGIDKIM<Mox>IDLDGTENK-C | * |                    |
| DQAGIDKIMIDLDGTENK        | NH2-DQAGIDKIMIDLDGTENK-COOH   | * |                    |
| EALELRDGDK                | NH2-EALELRDGDK-COOH           | * |                    |
| EIIDSR                    | NH2-EIIDSR-COOH               | * |                    |
| FGANAILAVSLANAK           | NH2-FGANAILAVSLANAK-COOH      | * | Midlog 1st control |
| FNQIGSLTETLAAIK           | NH2-FNQIGSLTETLAAIK-COOH      | * | Midlog 1st control |
| GIANSILIK                 | NH2-GIANSILIK-COOH            | * | Midlog 1st control |
| GmNTAVGDEGGYAPNLGSNAEA    | NH2-GM<Mox>NTAVGDEGGYAPNLGS   | * |                    |
| GMNTAVGDEGGYAPNLGSNAEALA  | NH2-GMNTAVGDEGGYAPNLGSNAEAL   | * |                    |
| GMPLYEHIAELNGTPGK         | NH2-GMPLYEHIAELNGTPGK-COOH    | * |                    |
| GNPTVEAEVHLEGGFVGMAAAPSG  | NH2-GNPTVEAEVHLEGGFVGM<Mox>   | * |                    |
| GNPTVEAEVHLEGGFVGMMAAAPS  | NH2-GNPTVEAEVHLEGGFVGMMAAAPS  | * |                    |
| IEEALGEKAPYNGR            | NH2-IEEALGEKAPYNGR-COOH       | * |                    |
| IEEALGEK                  | NH2-IEEALGEK-COOH             | * |                    |
| ILKEGIEK                  | NH2-ILKEGIEK-COOH             | * |                    |
| IMIDLDGTENK               | NH2-IMIDLDGTENK-COOH          | * |                    |
| IQLVGDDLFVTNTK            | NH2-IQLVGDDLFVTNTK-COOH       | * | Midlog 1st control |
| mGSEVFHHLAK               | NH2-M<Mox>GSEVFHHLAK-COOH     | * |                    |
| MGSEVFHHLAK               | NH2-MGSEVFHHLAK-COOH          | * |                    |
| QYPIVSIEDGLDESDWDGFAYQTK  | NH2-QYPIVSIEDGLDESDWDGFAYQTK  | * |                    |
| SGETEDATIADLAVGTAAGQIK    | NH2-SGETEDATIADLAVGTAAGQIK-CO | * | Midlog 1st control |
| VLGDKIQLVGDDLFVTNTK       | NH2-VLGDKIQLVGDDLFVTNTK-COOH  | * | Midlog 1st control |
| YNQLIR                    | NH2-YNQLIR-COOH               | * | Midlog 1st control |
| YSMPVPMMNIIINGGEHADNNVDIC | NH2-YSMPVPMMNIIINGGEHADNNVD   | * |                    |
| YVLAGEGNK                 | NH2-YVLAGEGNK-COOH            | * |                    |
| EDLLASGR                  | NH2-EDLLASGR-COOH             | * |                    |
| ESYTKEDLLASGR             | NH2-ESYTKEDLLASGR-COOH        | * |                    |
| FTGQVLPTAK                | NH2-FTGQVLPTAK-COOH           | * |                    |
| GPQLPAPNmLmmDR            | NH2-GPQLPAPNM<Mox>LM<Mox>M    | * |                    |
| GPQLPAPNmLmMDR            | NH2-GPQLPAPNM<Mox>LM<Mox>M    | * |                    |
| GPQLPAPNmLMmDR            | NH2-GPQLPAPNM<Mox>LMM<Mox>    | * |                    |
| GPQLPAPNMLmmDR            | NH2-GPQLPAPNMLM<Mox>M<Mox>    | * |                    |
| GPQLPAPNMLMMDR            | NH2-GPQLPAPNMLMMDR-COOH       | * |                    |
| LImGLADGEVLVDGR           | NH2-LIM<Mox>GLADGEVLVDGR-COC  | * |                    |
| LIMGLADGEVLVDGR           | NH2-LIMGLADGEVLVDGR-COOH      | * |                    |
| LIYTASDLK                 | NH2-LIYTASDLK-COOH            | * |                    |
| mTETGGNFDK                | NH2-M<Mox>TETGGNFDK-COOH      | * |                    |
| MTETGGNFDK                | NH2-MTETGGNFDK-COOH           | * |                    |
| VGLFQDTSAF                | NH2-VGLFQDTSAF-COOH           | * |                    |
| AVGPYVVTK                 | NH2-AVGPYVVTK-COOH            | * |                    |
| AVITGLGIVSSIGNNQEVLASLR   | NH2-AVITGLGIVSSIGNNQEVLASLR-C | * |                    |
| DSGmR                     | NH2-DSGM<Mox>R-COOH           | * |                    |
| EVFGDKSPAISATK            | NH2-EVFGDKSPAISATK-COOH       | * |                    |

|                            |                                |   |                    |
|----------------------------|--------------------------------|---|--------------------|
| VGLIAGSGGGSPR              | NH2-VGLIAGSGGGSPR-COOH         | * | Midlog 1st control |
| ACEEAAEGQVVSPVNFNSPGQVVIA  | NH2-AC<Cmm*>EAAEGQVVSPVNFN     | * |                    |
| ITFNAPTVPVVNNVDVK          | NH2-ITFNAPTVPVVNNVDVK-COOH     | * | Midlog 1st control |
| IVDTLTASALNEPSAmAAALEL     | NH2-IVDTLTASALNEPSAM<Mox>AAA   | * |                    |
| IVDTLTASALNEPSAMAAALEL     | NH2-IVDTLTASALNEPSAMAAALEL-CO  | * |                    |
| QLYNPVQWTK                 | NH2-QLYNPVQWTK-COOH            | * | Midlog 1st control |
| SVEYmAAQGVHEHLYEVGPGK      | NH2-SVEYM<Mox>AAQGVHEHLYEVGP   | * | Midlog 1st control |
| SVEYMAAQGVHEHLYEVGPGK      | NH2-SVEYMAAQGVHEHLYEVGPGK-COC  | * |                    |
| TWQTQPALLTASVALYR          | NH2-TWQTQPALLTASVALYR-COOH     | * |                    |
| ALLAGQSGISLIDHFDTSAYATK    | NH2-ALLAGQSGISLIDHFDTSAYATK-CO | * |                    |
| ASTPLGVGGFGAAR             | NH2-ASTPLGVGGFGAAR-COOH        | * | Midlog 1st control |
| VVVTGLGMLSPVGNTVESTWK      | NH2-VVVTGLGMLSPVGNTVESTWK-CC   | * |                    |
| AEFGEVDILVNNAGITR          | NH2-AEFGEVDILVNNAGITR-COOH     | * |                    |
| AGILAQVPAGR                | NH2-AGILAQVPAGR-COOH           | * |                    |
| AIAETLAAR                  | NH2-AIAETLAAR-COOH             | * |                    |
| GITVNVVAPGFIETDmTR         | NH2-GITVNVVAPGFIETDM<Mox>TR-C  | * |                    |
| GITVNVVAPGFIETDMTR         | NH2-GITVNVVAPGFIETDMTR-COOH    | * |                    |
| GLmLNVTDPASIESVLEK         | NH2-GLM<Mox>LNVTDPASIESVLEK-C  | * |                    |
| GLMLNVTDPASIESVLEK         | NH2-GLMLNVTDPASIESVLEK-COOH    | * |                    |
| IALVTGASR                  | NH2-IALVTGASR-COOH             | * |                    |
| VAVTELAHIVDETLAANNLDR      | NH2-VAVTELAHIVDETLAANNLDR-COC  | * |                    |
| ASLEANVR                   | NH2-ASLEANVR-COOH              | * |                    |
| VNAISAGPIR                 | NH2-VNAISAGPIR-COOH            | * |                    |
| IEAVADDLASLVLDAR           | NH2-IEAVADDLASLVLDAR-COOH      | * |                    |
| TADMIPPLLFPR               | NH2-TADMIPPLLFPR-COOH          | * |                    |
| AAVAFLGTAIDAGHTNVLALQSSAA  | NH2-AAVAFLGTAIDAGHTNVLALQSSA   | * |                    |
| GEVVNAACAVDAGSVDQTVQLGQV   | NH2-GEVVNAAC<Cmm*>AVDAGSVD     | * |                    |
| TASLAQEGATSSAVGFNIQLNDCDTI | NH2-TASLAQEGATSSAVGFNIQLNDC<   | * |                    |
| TGAALTDGATFSSETTLNNGTNTIPI | NH2-TGAALTDGATFSSETTLNNGTNTI   | * |                    |
| YFATGAATPGAANADATFK        | NH2-YFATGAATPGAANADATFK-COOH   | * |                    |
| ILLSPCGNAVSAVK             | NH2-ILLSPC<Cmm*>GNAVSAVK-COO   | * |                    |
| AGSLIAVLILR                | NH2-AGSLIAVLILR-COOH           | * |                    |
| GSAYGGVLSNFSGTVK           | NH2-GSAYGGVLSNFSGTVK-COOH      | * |                    |
| TDKPWPVALYLTPVSSAGGVAIK    | NH2-TDKPWPVALYLTPVSSAGGVAIK-C  | * |                    |
| YSGSSYPFPTTSETPR           | NH2-YSGSSYPFPTTSETPR-COOH      | * |                    |
| DSDTVVVNYK                 | NH2-DSDTVVVNYK-COOH            | * | Midlog 1st control |
| GTLIDGKEFDNSYTR            | NH2-GTLIDGKEFDNSYTR-COOH       | * |                    |
| LDGVIPGWTEGLK              | NH2-LDGVIPGWTEGLK-COOH         | * |                    |
| LGIKLDKDQLIAGVQDAFADK      | NH2-LGIKLDKDQLIAGVQDAFADK-COC  | * |                    |
| LSDQEIEQTLQAFEAR           | NH2-LSDQEIEQTLQAFEAR-COOH      | * |                    |
| SAYALGASLGR                | NH2-SAYALGASLGR-COOH           | * | Midlog 1st control |
| EGVNSTESGLQFR              | NH2-EGVNSTESGLQFR-COOH         | * |                    |
| FQAMAAEGVK                 | NH2-FQAMAAEGVK-COOH            | * |                    |
| LIDGTVFDSSVAR              | NH2-LIDGTVFDSSVAR-COOH         | * |                    |
| VINQGEAIPAR                | NH2-VINQGEAIPAR-COOH           | * |                    |
| AITGIFFGSDTGNTENIAK        | NH2-AITGIFFGSDTGNTENIAK-COOH   | * | Midlog 1st control |
| GATIVGHWPTAGYHFEASK        | NH2-GATIVGHWPTAGYHFEASK-COOH   | * |                    |
| QISEELHLDEILNA             | NH2-QISEELHLDEILNA-COOH        | * |                    |

|                           |                                          |   |                    |
|---------------------------|------------------------------------------|---|--------------------|
| IIFAGTPDFAAR              | NH2-IIFAGTPDFAAR-COOH                    | * |                    |
| QLADGTAKPEVQDETLVTYAEK    | NH2-QLADGTAKPEVQDETLVTYAEK-COOH          | * |                    |
| AANVGVIIER                | NH2-AANVGVIIER-COOH                      | * |                    |
| VAEEVAELLAR               | NH2-VAEEVAELLAR-COOH                     | * |                    |
| LAGEQATER                 | NH2-LAGEQATER-COOH                       | * |                    |
| SILLTALAR                 | NH2-SILLTALAR-COOH                       | * |                    |
| VTSVEAITDTVYR             | NH2-VTSVEAITDTVYR-COOH                   | * |                    |
| IIAIDTNP                  | NH2-IIAIDTNP-COOH                        | * | Midlog 1st control |
| TNLCVAVR                  | NH2-TNLC<Cmm*>VAVR-COOH                  | * | Midlog 1st control |
| IPVTSEGLAAIK              | NH2-IPVTSEGLAAIK-COOH                    | * |                    |
| VDAQGGDGIR                | NH2-VDAQGGDGIR-COOH                      | * |                    |
| FImIDPK                   | NH2-FIM<Mox>IDPK-COOH                    | * |                    |
| QFAQTQQQR                 | NH2-QFAQTQQQR-COOH                       | * |                    |
| DLGILTVAVVTKPFNFEGK       | NH2-DLGILTVAVVTKPFNFEGK-COOH             | * |                    |
| GISLLDAFGAANDVLK          | NH2-GISLLDAFGAANDVLK-COOH                | * |                    |
| GLGAGANPEVGR              | NH2-GLGAGANPEVGR-COOH                    | * |                    |
| HVDSLITIPNDK              | NH2-HVDSLITIPNDK-COOH                    | * |                    |
| LDEFETVGNTIR              | NH2-LDEFETVGNTIR-COOH                    | * |                    |
| MAFAEQGITELSK             | NH2-MAFAEQGITELSK-COOH                   | * |                    |
| NAADED                    | NH2-NAADED-COOH                          | * |                    |
| QVQQPVmDR                 | NH2-QVQQPVM<Mox>DR-COOH                  | * |                    |
| TAVGQTIQIGSGITK           | NH2-TAVGQTIQIGSGITK-COOH                 | * |                    |
| VIGVGGGGGNAVEHMVR         | NH2-VIGVGGGGGNAVEHMVR-COOH               | * |                    |
| VVNDNAPQTAK               | NH2-VVNDNAPQTAK-COOH                     | * |                    |
| YQQHGMAPLTQEKP            | NH2-YQQHGMAPLTQEKP-COOH                  | * |                    |
| GVLPTCQDTGTAIIVGK         | NH2-GVLPTC<Cmm*>QDTGTAIIVGK-COOH         | * |                    |
| TLGTAACPPYHIAFVIGG        | NH2-TLGTAAC<Cmm*>PPYHIAFVIGG-COOH        | * |                    |
| TPAGYPSGSLGPTTAGR         | NH2-TPAGYPSGSLGPTTAGR-COOH               | * |                    |
| AGIALNDNFVK               | NH2-AGIALNDNFVK-COOH                     | * | Midlog 1st control |
| DNTPMFVK                  | NH2-DNTPM<Mox>FVK-COOH                   | * | Midlog 1st control |
| FDGTVEVK                  | NH2-FDGTVEVK-COOH                        | * |                    |
| GANFDKYAGQDIVSNASCTTNCLAP | NH2-GANFDKYAGQDIVSNASC<Cmm*>TTNCLAP-COOH | * |                    |
| GASQNIIPSSTGAAK           | NH2-GASQNIIPSSTGAAK-COOH                 | * | Midlog 1st control |
| KVVM                      | NH2-KVVM-COOH                            | * |                    |
| LVS                       | NH2-LVS-COOH                             | * | Midlog 1st control |
| VGIN                      | NH2-VGIN-COOH                            | * | Midlog 1st control |
| VINDNFGIIEGLmTTVHATTATQK  | NH2-VINDNFGIIEGLM<Mox>TTVHATTATQK-COOH   | * | Midlog 1st control |
| VINDNFGIIEGLMTTVHATTATQK  | NH2-VINDNFGIIEGLMTTVHATTATQK-COOH        | * |                    |
| VLDLIAHISK                | NH2-VLDLIAHISK-COOH                      | * | Midlog 1st control |
| VLPELNGK                  | NH2-VLPELNGK-COOH                        | * | Midlog 1st control |
| VPTPNVSVVDLTVR            | NH2-VPTPNVSVVDLTVR-COOH                  | * | Midlog 1st control |
| VPTPNVSVVDLTVRLEK         | NH2-VPTPNVSVVDLTVRLEK-COOH               | * | Midlog 1st control |
| VTAERDPANLK               | NH2-VTAERDPANLK-COOH                     | * |                    |
| WDEVGVDVVAEATGLFLTDE      | NH2-WDEVGVDVVAEATGLFLTDE-COOH            | * |                    |
| YAGQDIVSNASCTTNCLAPLAK    | NH2-YAGQDIVSNASC<Cmm*>TTNCLAPLAK-COOH    | * |                    |
| YDSTHGRFDGTVEVK           | NH2-YDSTHGRFDGTVEVK-COOH                 | * |                    |
| ETVLNLLALR                | NH2-ETVLNLLALR-COOH                      | * |                    |
| HFSTTPAEK                 | NH2-HFSTTPAEK-COOH                       | * |                    |

|                                  |                                           |   |
|----------------------------------|-------------------------------------------|---|
| ILPELKDDKEISSHDSSTNGLINR         | NH2-ILPELKDDKEISSHDSSTNGLINR-COOH         | * |
| LLSNFFAQTEALAFGK                 | NH2-LLSNFFAQTEALAFGK-COOH                 | * |
| NINPTQTAAWQALQK                  | NH2-NINPTQTAAWQALQK-COOH                  | * |
| VFEGNRPTNSILLR                   | NH2-VFEGNRPTNSILLR-COOH                   | * |
| VNPETTLFLVASK                    | NH2-VNPETTLFLVASK-COOH                    | * |
| ADVAPSNLAIVGR                    | NH2-ADVAPSNLAIVGR-COOH                    | * |
| AVIPVAGLGTR                      | NH2-AVIPVAGLGTR-COOH                      | * |
| EAFALAQIEQELIAPENR               | NH2-EAFALAQIEQELIAPENR-COOH               | * |
| IQSGELSAIPHQLIMDK                | NH2-IQSGELSAIPHQLIMDK-COOH                | * |
| TAYWELVR                         | NH2-TAYWELVR-COOH                         | * |
| TGFNDSLLDIR                      | NH2-TGFNDSLLDIR-COOH                      | * |
| ALAHFMGVPVAIAPTIASTDAPCSAL       | NH2-ALAHFMGVPVAIAPTIASTDAPC<Cmm*>         | * |
| AmLAAEQHVVTPALER                 | NH2-AM<Mox>LAAEQHVVTPALER-COOH            | * |
| AMLAAEQHVVTPALER                 | NH2-AMLAAEQHVVTPALER-COOH                 | * |
| CTQAALALAELCYNTLLEEGER           | NH2-C<Cmm*>TQAALALAELC<Cmm*>              | * |
| DAGLVVEIAPFGGECQNEIDR            | NH2-DAGLVVEIAPFGGEC<Cmm*>SQN              | * |
| DAGLVVEIAPFGGECQNEIDRLR          | NH2-DAGLVVEIAPFGGEC<Cmm*>SQN              | * |
| FLQWE                            | NH2-FLQWE-COOH                            | * |
| FVLGFAQSTVEK                     | NH2-FVLGFAQSTVEK-COOH                     | * |
| GIAETAQC&Cmm*>GAILGIGGGK         | NH2-GIAETAQC<Cmm*>GAILGIGGGK              | * |
| IIQSPGK                          | NH2-IIQSPGK-COOH                          | * |
| IVAEAACA&Cmm*>AEGETIHNMPGATPDQV  | NH2-IVAEAAC<Cmm*>AEGETIHNMPG              | * |
| IVAGAPAR                         | NH2-IVAGAPAR-COOH                         | * |
| LGEYLKPLAER                      | NH2-LGEYLKPLAER-COOH                      | * |
| LLAAGIGDALATWFEAR                | NH2-LLAAGIGDALATWFEAR-COOH                | * |
| PLAER                            | NH2-PLAER-COOH                            | * |
| SFKDAGLVVEIAPFGGECQNEIDR         | NH2-SFKDAGLVVEIAPFGGEC<Cmm*>              | * |
| SFKDAGLVVEIAPFGGECQNEIDRLI       | NH2-SFKDAGLVVEIAPFGGEC<Cmm*>              | * |
| SGATTMAGGK                       | NH2-SGATTMAGGK-COOH                       | * |
| WLVVGDK                          | NH2-WLVVGDK-COOH                          | * |
| WLVVGDKFVLGFAQSTVEK              | NH2-WLVVGDKFVLGFAQSTVEK-COOH              | * |
| YIQGADVNR                        | NH2-YIQGADVNR-COOH                        | * |
| YLLLPNNPNmVIVDTK                 | NH2-YLLLPNNPNM<Mox>VIVDTK-COOH            | * |
| YLLLPNNPNMVIVDTK                 | NH2-YLLLPNNPNMVIVDTK-COOH                 | * |
| EDKVIFGGR                        | NH2-EDKVIFGGR-COOH                        | * |
| IIYTGPI&Cmm*>QYFDYR              | NH2-IIYTGPI&Cmm*>QYFDYR-COOH              | * |
| LGIDFLKDKDSLASK                  | NH2-LGIDFLKDKDSLASK-COOH                  | * |
| ALSLFC&Cmm*>VIMGR                | NH2-ALSLFC<Cmm*>VIMGR-COOH                | * |
| LALCDIAS&Cmm*>GEISQAK            | NH2-LALC<Cmm*>DIAS&Cmm*>GEISQAK-COOH      | * |
| DVAEILLEGLR                      | NH2-DVAEILLEGLR-COOH                      | * |
| DVAEILLEGLRR                     | NH2-DVAEILLEGLRR-COOH                     | * |
| EIYEQ&Cmm*>PNAIK                 | NH2-EIYEQ&Cmm*>PNAIK-COOH                 | * |
| ELGYL&Cmm*>GSLAICNVP&Cmm*>GSSLVR | NH2-ELGYL&Cmm*>GSLAIC<Cmm*>NVP&Cmm*>GSSLV | * |
| FIFLEEGDIAEITR                   | NH2-FIFLEEGDIAEITR-COOH                   | * |
| FIFLEEGDIAEITRR                  | NH2-FIFLEEGDIAEITRR-COOH                  | * |
| GAYGTVIMDSR                      | NH2-GAYGTVIMDSR-COOH                      | * |
| GDQYPIALEGALK                    | NH2-GDQYPIALEGALK-COOH                    | * |
| GLDASIEHDIVHGLQALPSR             | NH2-GLDASIEHDIVHGLQALPSR-COOH             | * |

Midlog 1st control

|                            |                               |                      |
|----------------------------|-------------------------------|----------------------|
| GTDVDQPR                   | NH2-GTDVDQPR-COOH             | *                    |
| GYDSAGLAVVDAEGHMTR         | NH2-GYDSAGLAVVDAEGHMTR-COOH   | *                    |
| HGPLALIDADmPVIVVAPNNELLEK  | NH2-HGPLALIDADM<Mox>PVIVVAPN  | *                    |
| HGPLALIDADMPVIVVAPNNELLEK  | NH2-HGPLALIDADMPVIVVAPNNELLEK | *                    |
| HPDTLLAAR                  | NH2-HPDTLLAAR-COOH            | *                    |
| IEQmLSQDKR                 | NH2-IEQM<Mox>LSQDKR-COOH      | *                    |
| IEQMLSQDKR                 | NH2-IEQMLSQDKR-COOH           | *                    |
| ISHGQVDLSELGPNADLLSK       | NH2-ISHGQVDLSELGPNADLLSK-COO  | *                    |
| LKSNIEEVR                  | NH2-LKSNIEEVR-COOH            | *                    |
| NSLMITLSQSGETADTLAAGR      | NH2-NSLMITLSQSGETADTLAAGR-COO | *                    |
| RQDIESNLQYDAGDKGIYR        | NH2-RQDIESNLQYDAGDKGIYR-COOH  | *                    |
| SNIEEVR                    | NH2-SNIEEVR-COOH              | *                    |
| SVNIFDKTGAEVK              | NH2-SVNIFDKTGAEVK-COOH        | *                    |
| VEHIQILACGTSYNSGMVSR       | NH2-VEHIQILAC<Cmm*>GTSYNSGMV  | *                    |
| VQMLAQAAEEHPLHGGTGIAHTR    | NH2-VQMLAQAAEEHPLHGGTGIAHTR   | *                    |
| AGGVFTDEAIDAYIALR          | NH2-AGGVFTDEAIDAYIALR-COOH    | *                    |
| AINALANPTTNSYK             | NH2-AINALANPTTNSYK-COOH       | *                    |
| CDILEPGTLQGYDRDPR          | NH2-C<Cmm*>DILEPGTLQGYDRDPR-  | *                    |
| FGSSISGSHVAIDDIEGAWNSSTQYE | NH2-FGSSISGSHVAIDDIEGAWNSSTQY | *                    |
| GGYFPVPPVDSAQDIR           | NH2-GGYFPVPPVDSAQDIR-COOH     | *                    |
| GKEQHVTIPAHQVNAEFFEFGK     | NH2-GKEQHVTIPAHQVNAEFFEFGK-C  | *                    |
| KADEIQIYK                  | NH2-KADEIQIYK-COOH            | *                    |
| LVPGYEAPVmLAYSAR           | NH2-LVPGYEAPVM<Mox>LAYSAR-CO  | *                    |
| LVPGYEAPVMLAYSAR           | NH2-LVPGYEAPVMLAYSAR-COOH     | *                    |
| MFDGSSIGGWK                | NH2-MFDGSSIGGWK-COOH          | *                    |
| RAEDYLR                    | NH2-RAEDYLR-COOH              | *                    |
| SAEHVLTmLNEHEVK            | NH2-SAEHVLTM<Mox>LNEHEVK-COC  | *                    |
| SAEHVLTMLNEHEVK            | NH2-SAEHVLTMLNEHEVK-COOH      | *                    |
| ADAVLHDTPNILYFIK           | NH2-ADAVLHDTPNILYFIK-COOH     | *                    |
| LVVATDTAFVPFEFK            | NH2-LVVATDTAFVPFEFK-COOH      | *                    |
| QFPNIDNAYMELGTNR           | NH2-QFPNIDNAYMELGTNR-COOH     | *                    |
| ADISSDQIAAIGITNQR          | NH2-ADISSDQIAAIGITNQR-COOH    | *                    |
| ATLESIAQTR                 | NH2-ATLESIAQTR-COOH           | *                    |
| GAIFGLTR                   | NH2-GAIFGLTR-COOH             | *                    |
| GVNANHIIR                  | NH2-GVNANHIIR-COOH            | *                    |
| SSEVYGQTNIGGK              | NH2-SSEVYGQTNIGGK-COOH        | *                    |
| FAYVDILQNPDIR              | NH2-FAYVDILQNPDIR-COOH        | *                    |
| GELQQLIK                   | NH2-GELQQLIK-COOH             | *                    |
| QIAENPILLYmK               | NH2-QIAENPILLYM<Mox>K-COOH    | *                    |
| QIAENPILLYMK               | NH2-QIAENPILLYMK-COOH         | *                    |
| YKSEEPDAE                  | NH2-YKSEEPDAE-COOH            | *                    |
| AmVEVFLER                  | NH2-AM<Mox>VEVFLER-COOH       | * Midlog 1st control |
| AMVEVFLER                  | NH2-AMVEVFLER-COOH            | *                    |
| EADAALGR                   | NH2-EADAALGR-COOH             | *                    |
| EAmEPEFK                   | NH2-EAM<Mox>EPEFK-COOH        | *                    |
| EAMEPEFK                   | NH2-EAMEPEFK-COOH             | *                    |
| ELAGWMCVLDVINDEAVIER       | NH2-ELAGWMC<Cmm*>DVLDSINDEA   | *                    |
| EMNIADYDAELWQAMEQEK        | NH2-EMNIADYDAELWQAMEQEK-COC   | *                    |

|                         |                                |   |                    |
|-------------------------|--------------------------------|---|--------------------|
| GGLILAK                 | NH2-GGLILAK-COOH               | * |                    |
| GGSEELYKK               | NH2-GGSEELYKK-COOH             | * |                    |
| KLNSAVFPGGQGGPLmHVIAGK  | NH2-KLNSAVFPGGQGGPLM<Mox>HV    | * |                    |
| KLNSAVFPGGQGGPLMHVIAGK  | NH2-KLNSAVFPGGQGGPLMHVIAGK-C   | * |                    |
| LNSAVFPGGQGGPLmHVIAGK   | NH2-LNSAVFPGGQGGPLM<Mox>HVI    | * |                    |
| LNSAVFPGGQGGPLMHVIAGK   | NH2-LNSAVFPGGQGGPLMHVIAGK-CC   | * |                    |
| LYNIVPYGIDATGHIDYADLEK  | NH2-LYNIVPYGIDATGHIDYADLEK-COC | * |                    |
| mIIGGFSAYSGVVDWAK       | NH2-M<Mox>IIGGFSAYSGVVDWAK-C   | * |                    |
| MIIGGFSAYSGVVDWAK       | NH2-MIIGGFSAYSGVVDWAK-COOH     | * |                    |
| NSVPNDPK                | NH2-NSVPNDPK-COOH              | * |                    |
| SPFVTSGIR               | NH2-SPFVTSGIR-COOH             | * | Midlog 1st control |
| TYQQQVAK                | NH2-TYQQQVAK-COOH              | * |                    |
| VGTPAIR                 | NH2-VGTPAIR-COOH               | * | Midlog 1st control |
| VmQAQGSQLTNK            | NH2-VM<Mox>QAQGSQLTNK-COOH     | * |                    |
| VMQAQGSQLTNK            | NH2-VMQAQGSQLTNK-COOH          | * |                    |
| VRQEEHIELIASENYTSR      | NH2-VRQEEHIELIASENYTSR-COOH    | * |                    |
| VVSGGTDNHLFLVDLVDK      | NH2-VVSGGTDNHLFLVDLVDK-COOH    | * |                    |
| VVSGGTDNHLFLVDLVDKNLTGK | NH2-VVSGGTDNHLFLVDLVDKNLTGK-C  | * |                    |
| YAEGYPGKR               | NH2-YAEGYPGKR-COOH             | * |                    |
| YPVYA                   | NH2-YPVYA-COOH                 | * |                    |
| AAVLLADSFK              | NH2-AAVLLADSFK-COOH            | * |                    |
| mAGTADIEIR              | NH2-M<Mox>AGTADIEIR-COOH       | * | Midlog 1st control |
| LASVLTPR                | NH2-LASVLTPR-COOH              | * | Midlog 1st control |
| ELPLTESLALTIDR          | NH2-ELPLTESLALTIDR-COOH        | * |                    |
| VIPYWNETILPR            | NH2-VIPYWNETILPR-COOH          | * |                    |
| YYLGNADIEIAAK           | NH2-YYLGNADIEIAAK-COOH         | * |                    |
| GEQQAmQVATR             | NH2-GEQQAM<Mox>QVATR-COOH      | * |                    |
| VNAALESCR               | NH2-VNAALESC<Cmm*>R-COOH       | * |                    |
| AFFANPVLTGAVDK          | NH2-AFFANPVLTGAVDK-COOH        | * |                    |
| AFVNADFDGFAR            | NH2-AFVNADFDGFAR-COOH          | * |                    |
| AVEALDHCVEEVAK          | NH2-AVEALDHC<Cmm*>VEEVAK-COC   | * |                    |
| DENDEFVK                | NH2-DENDEFVK-COOH              | * |                    |
| IVYQDLTR                | NH2-IVYQDLTR-COOH              | * |                    |
| LDVEIKDR                | NH2-LDVEIKDR-COOH              | * |                    |
| VATYDLQPEMSSAELTEK      | NH2-VATYDLQPEMSSAELTEK-COOH    | * |                    |
| AGYAEDEVVAVSK           | NH2-AGYAEDEVVAVSK-COOH         | * |                    |
| EVPVEVKPEVR             | NH2-EVPVEVKPEVR-COOH           | * |                    |
| FNSLTPEQQR              | NH2-FNSLTPEQQR-COOH            | * |                    |
| LGDIEYR                 | NH2-LGDIEYR-COOH               | * |                    |
| mITGIQITK               | NH2-M<Mox>ITGIQITK-COOH        | * |                    |
| MITGIQITK               | NH2-MITGIQITK-COOH             | * |                    |
| TFTESL                  | NH2-TFTESL-COOH                | * |                    |
| VEGGQHNLNVNLR           | NH2-VEGGQHNLNVNLR-COOH         | * |                    |
| GLIGKEEDDVVVIK          | NH2-GLIGKEEDDVVVIK-COOH        | * |                    |
| LSNAQVIDVTK             | NH2-LSNAQVIDVTK-COOH           | * |                    |
| mQAIPmTLR               | NH2-M<Mox>QAIPM<Mox>TLR-COO    | * |                    |
| RPEIIAIAEAR             | NH2-RPEIIAIAEAR-COOH           | * |                    |
| TPGGEVEFEVIKVEYL        | NH2-TPGGEVEFEVIKVEYL-COOH      | * |                    |



|                                               |                               |   |
|-----------------------------------------------|-------------------------------|---|
| ANPDM <sup>m</sup> SAM <sup>m</sup> VEGIELTLK | NH2-ANPDM<Mox>SAM<Mox>VEGIE   | * |
| FINELLPVIDSLDR                                | NH2-FINELLPVIDSLDR-COOH       | * |
| SMLDVVR                                       | NH2-SMLDVVR-COOH              | * |
| VANLEAQLAEAQTR                                | NH2-VANLEAQLAEAQTR-COOH       | * |
| AFTGVGGTPLFIEK                                | NH2-AFTGVGGTPLFIEK-COOH       | * |
| ELIPGGVNSPVR                                  | NH2-ELIPGGVNSPVR-COOH         | * |
| GLSFGAPTE <sup>m</sup> EVK                    | NH2-GLSFGAPTEM<Mox>EVK-COOH   | * |
| GLSFGAPTEMEVK                                 | NH2-GLSFGAPTEMEVK-COOH        | * |
| IIGGGMPVGAFGGR                                | NH2-IIGGGMPVGAFGGR-COOH       | * |
| MAQLVTELVPTMDMVR                              | NH2-MAQLVTELVPTMDMVR-COOH     | * |
| NAVIEAAER                                     | NH2-NAVIEAAER-COOH            | * |
| VALAGAQDYGVVDPDLTCLGK                         | NH2-VALAGAQDYGVVDPDLTC<Cmm*   | * |
| YTLTCTYNDLASVR                                | NH2-YTLTC<Cmm*>TYNDLASVR-COO  | * |
| GGIEYIEVR                                     | NH2-GGIEYIEVR-COOH            | * |
| ELGGTCVNVGCVPK                                | NH2-ELGGTC<Cmm*>VNVGC<Cmm*    | * |
| AGDDAARPEWLEPEFGVR                            | NH2-AGDDAARPEWLEPEFGVR-COOH   | * |
| <sup>m</sup> GCNTTGVR                         | NH2-AM<Mox>GC<Cmm*>NTTGVR-C   | * |
| AMGCNTTGVR                                    | NH2-AMGC<Cmm*>NTTGVR-COOH     | * |
| ARAEVEVDAK                                    | NH2-ARAEVEVDAK-COOH           | * |
| EITPVNIEEELK                                  | NH2-EITPVNIEEELK-COOH         | * |
| ETIIVHEIPYQVNK                                | NH2-ETIIVHEIPYQVNK-COOH       | * |
| GIEEAYR                                       | NH2-GIEEAYR-COOH              | * |
| GRPIVNLLPLEQDER                               | NH2-GRPIVNLLPLEQDER-COOH      | * |
| IKEEDFIDR                                     | NH2-IKEEDFIDR-COOH            | * |
| ITAILPVTEFEEGVK                               | NH2-ITAILPVTEFEEGVK-COOH      | * |
| IVIEVKR                                       | NH2-IVIEVKR-COOH              | * |
| LGEGDKVVSLIVPR                                | NH2-LGEGDKVVSLIVPR-COOH       | * |
| LLVANTHDHILCFSSR                              | NH2-LLVANTHDHILC<Cmm*>FSSR-CC | * |
| MAQPFSLR                                      | NH2-MAQPFSLR-COOH             | * |
| NTQGVILIR                                     | NH2-NTQGVILIR-COOH            | * |
| RGIEEAYR                                      | NH2-RGIEEAYR-COOH             | * |
| TAEDENVVGLQR                                  | NH2-TAEDENVVGLQR-COOH         | * |
| TALVANPWQLGNVAAMLER                           | NH2-TALVANPWQLGNVAAMLER-COC   | * |
| TAVAEYPTK                                     | NH2-TAVAEYPTK-COOH            | * |
| TVLTEFNR                                      | NH2-TVLTEFNR-COOH             | * |
| VLYAMNVLGNDWNK                                | NH2-VLYAMNVLGNDWNK-COOH       | * |
| VSEISIVGR                                     | NH2-VSEISIVGR-COOH            | * |
| VVGDVIGK                                      | NH2-VVGDVIGK-COOH             | * |
| VYQLPEATR                                     | NH2-VYQLPEATR-COOH            | * |
| YHPHGDSAVYDTIVR                               | NH2-YHPHGDSAVYDTIVR-COOH      | * |
| YQPLSEYEAQR                                   | NH2-YQPLSEYEAQR-COOH          | * |
| GIPTGIHPEEGVSAAEVIMTVLHAGG                    | NH2-GIPTGIHPEEGVSAAEVIMTVLHAG | * |
| QIYEHGVPQAPLAVTGETEK                          | NH2-QIYEHGVPQAPLAVTGETEK-COOH | * |
| ILVIAADER                                     | NH2-ILVIAADER-COOH            | * |
| KLLTGDSPPFAANALGK                             | NH2-KLLTGDSPPFAANALGK-COOH    | * |
| AKGQSLQDPFLNALR                               | NH2-AKGQSLQDPFLNALR-COOH      | * |
| AKGQSLQDPFLNALRR                              | NH2-AKGQSLQDPFLNALRR-COOH     | * |
| ERVPVSIYLVNGIK                                | NH2-ERVPVSIYLVNGIK-COOH       | * |



|                          |                                    |   |                    |
|--------------------------|------------------------------------|---|--------------------|
| GQSLQDPFLNALR            | NH2-GQSLQDPFLNALR-COOH             | * |                    |
| LQGQIESFDQFVILLK         | NH2-LQGQIESFDQFVILLK-COOH          | * |                    |
| NTVSQMVMYK               | NH2-NTVSQMVMYK-COOH                | * |                    |
| VPVSIYLVNGIK             | NH2-VPVSIYLVNGIK-COOH              | * |                    |
| AGLADAICDLVSTGATLEANGLR  | NH2-AGLADAIC<Cmm*>DLVSTGATLE       | * |                    |
| ALGASSILVLPKIEK          | NH2-ALGASSILVLPKIEK-COOH           | * |                    |
| IQGVIQAR                 | NH2-IQGVIQAR-COOH                  | * |                    |
| LDEVIALPGAERPTILPLAGDQQR | NH2-LDEVIALPGAERPTILPLAGDQQR-      | * |                    |
| LIAMAENMPIDILR           | NH2-LIAMAENMPIDILR-COOH            | * |                    |
| LSLATPVDEAWDGPLSLNGK     | NH2-LSLATPVDEAWDGPLSLNGK-COO       | * |                    |
| SCLLNGSVEVAPR            | NH2-SC<Cmm*>LLNGSVEVAPR-COOH       | * |                    |
| GADEGIELLIR              | NH2-GADEGIELLIR-COOH               | * |                    |
| STVTITDLAR               | NH2-STVTITDLAR-COOH                | * | Midlog 1st control |
| VIDALRAEQV               | NH2-VIDALRAEQV-COOH                | * |                    |
| <QILPEANSQIVGFR          | #Gln->pyro-Glu (N-term Q)#-QILPEAN | * |                    |
| AAGYDKPFK                | NH2-AAGYDKPFK-COOH                 | * |                    |
| AESFQAVADATLAYHK         | NH2-AESFQAVADATLAYHK-COOH          | * |                    |
| AESFQAVADATLAYHKK        | NH2-AESFQAVADATLAYHKK-COOH         | * |                    |
| ALNDKGITDILVVDNLK        | NH2-ALNDKGITDILVVDNLK-COOH         | * |                    |
| ALNDKGITDILVVDNLKDGTK    | NH2-ALNDKGITDILVVDNLKDGTK-COC      | * |                    |
| EIPFLYASSAATYGGR         | NH2-EIPFLYASSAATYGGR-COOH          | * |                    |
| ELLHYCLER                | NH2-ELLHYC<Cmm*>LER-COOH           | * |                    |
| EYEKPLNVYGYSK            | NH2-EYEKPLNVYGYSK-COOH             | * |                    |
| FLFDEYVR                 | NH2-FLFDEYVR-COOH                  | * |                    |
| GITDILVVDNLK             | NH2-GITDILVVDNLK-COOH              | * |                    |
| GITDILVVDNLKDGTK         | NH2-GITDILVVDNLKDGTK-COOH          | * |                    |
| GQIEYIPFPDK              | NH2-GQIEYIPFPDK-COOH               | * |                    |
| GQIEYIPFPDKLK            | NH2-GQIEYIPFPDKLK-COOH             | * |                    |
| GRYQAFTQADLTNLR          | NH2-GRYQAFTQADLTNLR-COOH           | * |                    |
| GsmASVAFHLNTQLNNGESPK    | NH2-GSM<Mox>ASVAFHLNTQLNNGE        | * |                    |
| GSMASVAFHLNTQLNNGESPK    | NH2-GSMASVAFHLNTQLNNGESPK-CC       | * |                    |
| KGQIEYIPFPDK             | NH2-KGQIEYIPFPDK-COOH              | * |                    |
| KGQIEYIPFPDKLK           | NH2-KGQIEYIPFPDKLK-COOH            | * |                    |
| LFEGSENFK                | NH2-LFEGSENFK-COOH                 | * |                    |
| LFEGSENFKR               | NH2-LFEGSENFKR-COOH                | * |                    |
| mIIVTGGAGFIGSNIVK        | NH2-M<Mox>IIVTGGAGFIGSNIVK-CO      | * |                    |
| MIIIVTGGAGFIGSNIVK       | NH2-MIIIVTGGAGFIGSNIVK-COOH        | * |                    |
| QILPEANSQIVGFR           | NH2-QILPEANSQIVGFR-COOH            | * |                    |
| TSDFIERS                 | NH2-TSDFIERS-COOH                  | * |                    |
| TVAEGVTEYmAWLNR          | NH2-TVAEGVTEYM<Mox>AWLNR-CO        | * |                    |
| TVAEGVTEYmAWLNRDA        | NH2-TVAEGVTEYM<Mox>AWLNRDA-        | * |                    |
| TVAEGVTEYMAWLNR          | NH2-TVAEGVTEYMAWLNR-COOH           | * |                    |
| TVAEGVTEYMAWLNRDA        | NH2-TVAEGVTEYMAWLNRDA-COOH         | * |                    |
| YFNVYGPR                 | NH2-YFNVYGPR-COOH                  | * |                    |
| YmmDNNYQYSK              | NH2-YM<Mox>M<Mox>DNNYQYSK-C        | * |                    |
| YmDNNYQYSK               | NH2-YMM<Mox>DNNYQYSK-COOH          | * |                    |
| YQAFTQADLTNLR            | NH2-YQAFTQADLTNLR-COOH             | * | Midlog 1st control |
| CDFVSVPTHTITK            | NH2-C<Cmm*>DFVSVPTHTITK-COOI       | * |                    |

|                           |                               |   |
|---------------------------|-------------------------------|---|
| CKTEEEIVER                | NH2-C<Cmm*>KTEEEIVER-COOH     | * |
| GALASVQQmiQLAR            | NH2-GALASVQQM<Mox>IQLAR-COOH  | * |
| GALASVQQMIQLAR            | NH2-GALASVQQMIQLAR-COOH       | * |
| GATLLTPNLSEFEAVVGK        | NH2-GATLLTPNLSEFEAVVGK-COOH   | * |
| GDSRPVNPLEQR              | NH2-GDSRPVNPLEQR-COOH         | * |
| GGDYKPEEIAGSK             | NH2-GGDYKPEEIAGSK-COOH        | * |
| INQALSSIGALVLSDYAK        | NH2-INQALSSIGALVLSDYAK-COOH   | * |
| ISPEAPVPVVK               | NH2-ISPEAPVPVVK-COOH          | * |
| LDFEEGFEGVDPQPLHER        | NH2-LDFEEGFEGVDPQPLHER-COOH   | * |
| LGTSTVSPIELENAVR          | NH2-LGTSTVSPIELENAVR-COOH     | * |
| LIAGILPDLLVK              | NH2-LIAGILPDLLVK-COOH         | * |
| LIVAVNSDASTK              | NH2-LIVAVNSDASTK-COOH         | * |
| LIVAVNSDASTKR             | NH2-LIVAVNSDASTKR-COOH        | * |
| LKGDSRPVNPLEQR            | NH2-LKGDSRPVNPLEQR-COOH       | * |
| LVGLTGIDDAAR              | NH2-LVGLTGIDDAAR-COOH         | * |
| NQQLIR                    | NH2-NQQLIR-COOH               | * |
| SEQGMSLLQPGK              | NH2-SEQGMSLLQPGK-COOH         | * |
| SLADVNVK                  | NH2-SLADVNVK-COOH             | * |
| VNTIEERPGGAANVAMNIASLGANA | NH2-VNTIEERPGGAANVAMNIASLGANA | * |
| XDEFQK                    | NH2-XDEFQK-COOH               | * |
| REEESAAAAEVEER            | NH2-REEESAAAAEVEER-COOH       | * |
| DLDEDIRGK                 | NH2-DLDEDIRGK-COOH            | * |
| DVLIVEDIIDSGNTLSK         | NH2-DVLIVEDIIDSGNTLSK-COOH    | * |
| GKDVIVEDIIDSGNTLSK        | NH2-GKDVIVEDIIDSGNTLSK-COOH   | * |
| GSFMFMADLCR               | NH2-GSFMFMADLC<Cmm*>R-COOH    | * |
| HLPYIGK                   | NH2-HLPYIGK-COOH              | * |
| IAELGR                    | NH2-IAELGR-COOH               | * |
| ILKDLDEDIR                | NH2-ILKDLDEDIR-COOH           | * |
| DSmSYAEQDVK               | NH2-DSM<Mox>SYAEQDVK-COOH     | * |
| DSMSYAEQDVK               | NH2-DSMSYAEQDVK-COOH          | * |
| ELLDAAIAAK                | NH2-ELLDAAIAAK-COOH           | * |
| ELVQDCR                   | NH2-ELVQDC<Cmm*>R-COOH        | * |
| EQAGIPDR                  | NH2-EQAGIPDR-COOH             | * |
| EQFNELIAPLVK              | NH2-EQFNELIAPLVK-COOH         | * |
| GIPALPAGGAHIR             | NH2-GIPALPAGGAHIR-COOH        | * |
| LAGLHVLR                  | NH2-LAGLHVLR-COOH             | * |
| mLAEQKVEAAR               | NH2-M<Mox>LAEQKVEAAR-COOH     | * |
| NTTIPVAR                  | NH2-NTTIPVAR-COOH             | * |
| NVDKQTQDFAAR              | NH2-NVDKQTQDFAAR-COOH         | * |
| QTQDFAAR                  | NH2-QTQDFAAR-COOH             | * |
| QVIDDAAAHLSEVAQGDDVDAIEQA | NH2-QVIDDAAAHLSEVAQGDDVDAIEQA | * |
| SLADIQQR                  | NH2-SLADIQQR-COOH             | * |
| VEAAR                     | NH2-VEAAR-COOH                | * |
| VLESLHGALAADAALLSAAER     | NH2-VLESLHGALAADAALLSAAER-COC | * |
| LYHEEEVTYDPQDVEFK         | NH2-LYHEEEVTYDPQDVEFK-COOH    | * |
| NNASPADPQVH               | NH2-NNASPADPQVH-COOH          | * |
| TEELLTPANEVLWR            | NH2-TEELLTPANEVLWR-COOH       | * |
| VQGEIPENADLK              | NH2-VQGEIPENADLK-COOH         | * |

|                            |                              |   |                    |
|----------------------------|------------------------------|---|--------------------|
| YLFENFAVR                  | NH2-YLFENFAVR-COOH           | * |                    |
| ALLENTELSAR                | NH2-ALLENTELSAR-COOH         | * | Midlog 1st control |
| LEmHQHGLVK                 | NH2-LEM<Mox>HQHGLVK-COOH     | * |                    |
| ALTPFIDR                   | NH2-ALTPFIDR-COOH            | * |                    |
| EILQDSTVTR                 | NH2-EILQDSTVTR-COOH          | * |                    |
| ELISNASDAADKLR             | NH2-ELISNASDAADKLR-COOH      | * |                    |
| GTLEDPNLFIR                | NH2-GTLEDPNLFIR-COOH         | * |                    |
| IYYITADSYAAAK              | NH2-IYYITADSYAAAK-COOH       | * |                    |
| SFLESLGSDQAK               | NH2-SFLESLGSDQAK-COOH        | * |                    |
| DEEVPALFTNK                | NH2-DEEVPALFTNK-COOH         | * |                    |
| DHLIADAIIVSK               | NH2-DHLIADAIIVSK-COOH        | * |                    |
| ESGVEAIPR                  | NH2-ESGVEAIPR-COOH           | * |                    |
| ISPHQLGLADVLSALR           | NH2-ISPHQLGLADVLSALR-COOH    | * |                    |
| IVEALEQR                   | NH2-IVEALEQR-COOH            | * |                    |
| AAQVPVVAVNK                | NH2-AAQVPVVAVNK-COOH         | * |                    |
| ADVQGSVEAISDLLK            | NH2-ADVQGSVEAISDLLK-COOH     | * |                    |
| APVVTIMGHVDHGK             | NH2-APVVTIMGHVDHGK-COOH      | * |                    |
| FKDDVNEVR                  | NH2-FKDDVNEVR-COOH           | * |                    |
| GPVATVLR                   | NH2-GPVATVLR-COOH            | * |                    |
| KVIEAESDLR                 | NH2-KVIEAESDLR-COOH          | * |                    |
| NGMECGIGVK                 | NH2-NGMEC<Cmm*>GIGVK-COOH    | * |                    |
| QQIIGLAEVR                 | NH2-QQIIGLAEVR-COOH          | * |                    |
| TSLLDYIR                   | NH2-TSLLDYIR-COOH            | * |                    |
| YYSVIYNLIDEVK              | NH2-YYSVIYNLIDEVK-COOH       | * |                    |
| ALENGEQVK                  | NH2-ALENGEQVK-COOH           | * |                    |
| LSGFGNFDLR                 | NH2-LSGFGNFDLR-COOH          | * |                    |
| TGEDIPITAR                 | NH2-TGEDIPITAR-COOH          | * |                    |
| VVTFRPGQK                  | NH2-VVTFRPGQK-COOH           | * |                    |
| ANIYG                      | NH2-ANIYG-COOH               | * |                    |
| GFGSFLHYR                  | NH2-GFGSFLHYR-COOH           | * |                    |
| LATQQSHIPAK                | NH2-LATQQSHIPAK-COOH         | * |                    |
| TGDKVELEGK                 | NH2-TGDKVELEGK-COOH          | * |                    |
| AEIVASFER                  | NH2-AEIVASFER-COOH           | * | Midlog 1st control |
| EYDHIKDVNDLPELLK           | NH2-EYDHIKDVNDLPELLK-COOH    | * |                    |
| LVAVPHSK                   | NH2-LVAVPHSK-COOH            | * |                    |
| MTDEAGEDAK                 | NH2-MTDEAGEDAK-COOH          | * |                    |
| SLLNVPAGK                  | NH2-SLLNVPAGK-COOH           | * | Midlog 1st control |
| VEGWENAEAAK                | NH2-VEGWENAEAAK-COOH         | * | Midlog 1st control |
| SLQFLDGTQLDFVK             | NH2-SLQFLDGTQLDFVK-COOH      | * |                    |
| VNTFLANR                   | NH2-VNTFLANR-COOH            | * |                    |
| ALGLNDELAHSSIR             | NH2-ALGLNDELAHSSIR-COOH      | * |                    |
| IAKEEmATEmER               | NH2-IAKEEM<Mox>ATEM<Mox>ER-C | * |                    |
| IEAQMHHGGGHER              | NH2-IEAQMHHGGGHER-COOH       | * |                    |
| NQIADLVGADPR               | NH2-NQIADLVGADPR-COOH        | * |                    |
| QGVDLNSIEWAHH              | NH2-QGVDLNSIEWAHH-COOH       | * |                    |
| ADSVLAGLK                  | NH2-ADSVLAGLK-COOH           | * |                    |
| ALNEGATITDEASALEYCGFHPQLVE | NH2-ALNEGATITDEASALEYC<Cmm*> | * |                    |
| ATTHLDVCAVPAAGFGR          | NH2-ATTHLDVC<Cmm*>AVPAAGFG   | * |                    |

|                            |                                |   |                    |
|----------------------------|--------------------------------|---|--------------------|
| ELLHDCLTR                  | NH2-ELLHDC<Cmm*>LTR-COOH       | * |                    |
| FAQLPLANHPQITVVDGGDER      | NH2-FAQLPLANHPQITVVDGGDER-CO   | * |                    |
| LLALSETSR                  | NH2-LLALSETSR-COOH             | * | Midlog 1st control |
| TGGILAAPVR                 | NH2-TGGILAAPVR-COOH            | * | Midlog 1st control |
| VTRPEDLALAEFYLTR           | NH2-VTRPEDLALAEFYLTR-COOH      | * |                    |
| VVIAISPGDSR                | NH2-VVIAISPGDSR-COOH           | * | Midlog 1st control |
| AAPWLVKPNR                 | NH2-AAPWLVKPNR-COOH            | * |                    |
| DLGIDVTVGGFLGK             | NH2-DLGIDVTVGGFLGK-COOH        | * |                    |
| DNQDGFQQLFSELGIANR         | NH2-DNQDGFQQLFSELGIANR-COOH    | * |                    |
| DVIEAAHALR                 | NH2-DVIEAAHALR-COOH            | * |                    |
| EALVAGLK                   | NH2-EALVAGLK-COOH              | * |                    |
| ELEIWAGR                   | NH2-ELEIWAGR-COOH              | * |                    |
| FQVVQGR                    | NH2-FQVVQGR-COOH               | * |                    |
| LATAVAALAVSQSNVGITDRPQLAA  | NH2-LATAVAALAVSQSNVGITDRPQLAA  | * |                    |
| LATAVAALAVSQSNVGITDRPQLAAI | NH2-LATAVAALAVSQSNVGITDRPQLAAI | * |                    |
| LATAVAALAVSQSNVGITDRPQLAAI | NH2-LATAVAALAVSQSNVGITDRPQLAAI | * |                    |
| SQCPCIIIFDSSR              | NH2-SQC<Cmm*>PC<Cmm*>IIFDSSR   | * |                    |
| VATITLNPAYDLVGFCEPIER      | NH2-VATITLNPAYDLVGFCE<Cmm*>PEI | * |                    |
| VDLQPFN                    | NH2-VDLQPFN-COOH               | * |                    |
| VLKDLGIDVTVGGFLGK          | NH2-VLKDLGIDVTVGGFLGK-COOH     | * |                    |
| ATVLGHIQR                  | NH2-ATVLGHIQR-COOH             | * |                    |
| GGTFLGSAR                  | NH2-GGTFLGSAR-COOH             | * |                    |
| IGVLTSGGDAPGmNAAIR         | NH2-IGVLTSGGDAPGM<Mox>NAAIR-   | * | Midlog 1st control |
| IGVLTSGGDAPGMNAAIR         | NH2-IGVLTSGGDAPGMNAAIR-COOH    | * |                    |
| ISVVEVMGR                  | NH2-ISVVEVMGR-COOH             | * | Midlog 1st control |
| mGAYAILLLAGYGGR            | NH2-M<Mox>GAYAILLLAGYGGR-CO    | * |                    |
| MGAYAILLLAGYGGR            | NH2-MGAYAILLLAGYGGR-COOH       | * |                    |
| YSVSDMINR                  | NH2-YSVSDMINR-COOH             | * | Midlog 1st control |
| LVTDELVIALVK               | NH2-LVTDELVIALVK-COOH          | * |                    |
| NGFLLDGFPR                 | NH2-NGFLLDGFPR-COOH            | * |                    |
| SFVVIIPAR                  | NH2-SFVVIIPAR-COOH             | * |                    |
| AQGTLYIVSAPSGAGK           | NH2-AQGTLYIVSAPSGAGK-COOH      | * |                    |
| GQDSEEVIK                  | NH2-GQDSEEVIK-COOH             | * |                    |
| GRGQDSEEVIK                | NH2-GRGQDSEEVIK-COOH           | * |                    |
| GRGQDSEEVIKR               | NH2-GRGQDSEEVIKR-COOH          | * |                    |
| SSLIQALLK                  | NH2-SSLIQALLK-COOH             | * |                    |
| LYTSLGDAAVGR               | NH2-LYTSLGDAAVGR-COOH          | * |                    |
| NSVIDEVVVCDTIPLSDEIK       | NH2-NSVIDEVVVC<Cmm*>DTIPLSDEI  | * |                    |
| TLTSLGMLAEAIR              | NH2-TLTSLGMLAEAIR-COOH         | * |                    |
| AEAGDVANAILDGTDVAmLSGESA   | NH2-AEAGDVANAILDGTDAVM<Mox>    | * |                    |
| AEAGDVANAILDGTDAVMLSGESA   | NH2-AEAGDVANAILDGTDAVMLSGESA   | * |                    |
| AGQTFFTTDDK                | NH2-AGQTFFTTDDK-COOH           | * |                    |
| AHGGENIHIISK               | NH2-AHGGENIHIISK-COOH          | * |                    |
| EITSTDDFYR                 | NH2-EITSTDDFYR-COOH            | * |                    |
| GAVETAEKLDAPLIVVATQGGK     | NH2-GAVETAEKLDAPLIVVATQGGK-CC  | * |                    |
| GDLGVEIPVEEVIFAQK          | NH2-GDLGVEIPVEEVIFAQK-COOH     | * | Midlog 1st control |
| GVNLPGVSIAPALAEK           | NH2-GVNLPGVSIAPALAEK-COOH      | * |                    |
| GVVPQLVK                   | NH2-GVVPQLVK-COOH              | * |                    |

|                            |                                     |   |                    |
|----------------------------|-------------------------------------|---|--------------------|
| ITEAVCR                    | NH2-ITEAVC<Cmm*>R-COOH              | * |                    |
| KYFPDATILALTTNEK           | NH2-KYFPDATILALTTNEK-COOH           | * |                    |
| LNFSHGDYAEHGQR             | NH2-LNFSHGDYAEHGQR-COOH             | * |                    |
| TAAILLDTK                  | NH2-TAAILLDTK-COOH                  | * |                    |
| TAAILLDTKGPEIR             | NH2-TAAILLDTKGPEIR-COOH             | * |                    |
| TESEEmLAK                  | NH2-TESEEM<Mox>LAK-COOH             | * |                    |
| VLNNGDLGENK                | NH2-VLNNGDLGENK-COOH                | * |                    |
| GLPADVVPGDILLDDGR          | NH2-GLPADVVPGDILLDDGR-COOH          | * |                    |
| mRADK                      | NH2-M<Mox>RADK-COOH                 | * |                    |
| TLNLTALYR                  | NH2-TLNLTALYR-COOH                  | * |                    |
| VIAAGANVVR                 | NH2-VIAAGANVVR-COOH                 | * |                    |
| DLIPR                      | NH2-DLIPR-COOH                      | * |                    |
| NVLAK                      | NH2-NVLAK-COOH                      | * |                    |
| ALDILTATPPDVFHNLENVPR      | NH2-ALDILTATPPDVFHNLENVPR-COOH      | * |                    |
| DGGAQHFADCITAIR            | NH2-DGGAQHFADC<Cmm*>ITAIR-COOH      | * |                    |
| IETLVPDFR                  | NH2-IETLVPDFR-COOH                  | * |                    |
| PVAPDANEPVK                | NH2-PVAPDANEPVK-COOH                | * |                    |
| MAQILDTPPQPAQNIAPSAVIDATAI | NH2-MAQILDTPPQPAQNIAPSAVIDATAI-COOH | * |                    |
| NPYLTYAR                   | NH2-NPYLTYAR-COOH                   | * |                    |
| VIIGDRVEIGACTTIDR          | NH2-VIIGDRVEIGAC<Cmm*>TTIDR-COOH    | * |                    |
| INSNEELALPK                | NH2-INSNEELALPK-COOH                | * |                    |
| PLLSFTVDHTR                | NH2-PLLSFTVDHTR-COOH                | * |                    |
| <QTVDEALKDAQTR             | #Gln->pyro-Glu (N-term Q)#-QTVDEA   | * | Midlog 1st control |
| AGLTLFLVDLIK               | NH2-AGLTLFLVDLIK-COOH               | * | Midlog 1st control |
| EFLENYLLTDEGLEAVNK         | NH2-EFLENYLLTDEGLEAVNK-COOH         | * | Midlog 1st control |
| FGGYAQSGLLAEITPDKAFQDK     | NH2-FGGYAQSGLLAEITPDKAFQDK-COOH     | * | Midlog 1st control |
| FGGYAQSGLLAEITPDK          | NH2-FGGYAQSGLLAEITPDK-COOH          | * | Midlog 1st control |
| FPQVAATGDGPDIIFWAHDR       | NH2-FPQVAATGDGPDIIFWAHDR-COOH       | * |                    |
| GEIMPNIPQMSAFWYAVR         | NH2-GEIMPNIPQMSAFWYAVR-COOH         | * |                    |
| GQPSKPFVGVLSAGINAASPNK     | NH2-GQPSKPFVGVLSAGINAASPNK-COOH     | * | Midlog 1st control |
| GYNGLAEVGK                 | NH2-GYNGLAEVGK-COOH                 | * | Midlog 1st control |
| LIAYPIAVEALSLIYNK          | NH2-LIAYPIAVEALSLIYNK-COOH          | * |                    |
| LYPFTWDAVR                 | NH2-LYPFTWDAVR-COOH                 | * | Midlog 1st control |
| QTVDEALKDAQTR              | NH2-QTVDEALKDAQTR-COOH              | * | Midlog 1st control |
| SYEEELAKDPR                | NH2-SYEEELAKDPR-COOH                | * |                    |
| TAVINAASGR                 | NH2-TAVINAASGR-COOH                 | * | Midlog 1st control |
| TWEEIPALDK                 | NH2-TWEEIPALDK-COOH                 | * | Midlog 1st control |
| TWEEIPALDKELK              | NH2-TWEEIPALDKELK-COOH              | * | Midlog 1st control |
| VNYGVTVLPTFK               | NH2-VNYGVTVLPTFK-COOH               | * | Midlog 1st control |
| IEISR                      | NH2-IEISR-COOH                      | * |                    |
| ENAAGIPmDAAER              | NH2-ENAAGIPM<Mox>DAAER-COOH         | * |                    |
| YIDIPELVANVK               | NH2-YIDIPELVANVK-COOH               | * |                    |
| ANQFLGMEPLPTFIANDVIK       | NH2-ANQFLGMEPLPTFIANDVIK-COOH       | * |                    |
| ACIGIITNPVNTTVAIAAEVLKK    | NH2-AC<Cmm*>IGIITNPVNTTVAIAAE       | * |                    |
| AGGGSATLSmGQAAAR           | NH2-AGGGSATLSM<Mox>GQAAAR-COOH      | * |                    |
| AGGGSATLSMGQAAAR           | NH2-AGGGSATLSMGQAAAR-COOH           | * |                    |
| FFSQPLLLGK                 | NH2-FFSQPLLLGK-COOH                 | * |                    |
| GFSGEDATPALEGADVVLISAGVAR  | NH2-GFSGEDATPALEGADVVLISAGVAR       | * |                    |

|                             |                                |   |                    |
|-----------------------------|--------------------------------|---|--------------------|
| IQNAGTEVVEAK                | NH2-IQNAGTEVVEAK-COOH          | * |                    |
| LFGVTTLDIIR                 | NH2-LFGVTTLDIIR-COOH           | * |                    |
| NLVQQVAK                    | NH2-NLVQQVAK-COOH              | * |                    |
| RIQNAGTEVVEAK               | NH2-RIQNAGTEVVEAK-COOH         | * |                    |
| SDLFNVNAGIVK                | NH2-SDLFNVNAGIVK-COOH          | * |                    |
| SNTFVAELK                   | NH2-SNTFVAELK-COOH             | * |                    |
| TQLPSGSELSLYDIAPVTPGVAVDLSF | NH2-TQLPSGSELSLYDIAPVTPGVAVDLS | * |                    |
| VAVLGAAGGIGQALALLK          | NH2-VAVLGAAGGIGQALALLK-COOH    | * |                    |
| EmIQALADAR                  | NH2-EM<Mox>IQALADAR-COOH       | * | Midlog 1st control |
| EmLQNSPmALR                 | NH2-EM<Mox>LQNSPM<Mox>ALR-C    | * | Midlog 1st control |
| EMIQALADAR                  | NH2-EMIQALADAR-COOH            | * | Midlog 1st control |
| YDDNIGVIILTGAGDK            | NH2-YDDNIGVIILTGAGDK-COOH      | * | Midlog 1st control |
| AALANMVQAAQNLR              | NH2-AALANMVQAAQNLR-COOH        | * |                    |
| ANVYEVR                     | NH2-ANVYEVR-COOH               | * |                    |
| APTGEPAAAAEMTK              | NH2-APTGEPAAAAEMTK-COOH        | * |                    |
| DALNSGDTAALAEWSAPIQAR       | NH2-DALNSGDTAALAEWSAPIQAR-CO   | * |                    |
| DGSVDIDTLFR                 | NH2-DGSVDIDTLFR-COOH           | * |                    |
| GNLDANNYR                   | NH2-GNLDANNYR-COOH             | * |                    |
| LAAITAQDSQR                 | NH2-LAAITAQDSQR-COOH           | * |                    |
| LPSDWLLSAGLINGR             | NH2-LPSDWLLSAGLINGR-COOH       | * |                    |
| QAIVEQER                    | NH2-QAIVEQER-COOH              | * |                    |
| SWFAFALQK                   | NH2-SWFAFALQK-COOH             | * |                    |
| TILNHTLGFPR                 | NH2-TILNHTLGFPR-COOH           | * |                    |
| FLNLIAGEPDIAR               | NH2-FLNLIAGEPDIAR-COOH         | * |                    |
| LGVQEVEASIELR               | NH2-LGVQEVEASIELR-COOH         | * |                    |
| QGFTIPLLIGGATTSK            | NH2-QGFTIPLLIGGATTSK-COOH      | * |                    |
| TPPVTEAAR                   | NH2-TPPVTEAAR-COOH             | * |                    |
| ADPLEQGAGDQGLMFGYATNETDV    | NH2-ADPLEQGAGDQGLMFGYATNETD    | * |                    |
| FVIGGPMGDCGLTGR             | NH2-FVIGGPMGDC<Cmm*>GLTGR-C    | * |                    |
| HGGGAFSGKDPSK               | NH2-HGGGAFSGKDPSK-COOH         | * |                    |
| HGGGAFSGKDPSKVDR            | NH2-HGGGAFSGKDPSKVDR-COOH      | * |                    |
| IADQISDAVLDAILEQDPK         | NH2-IADQISDAVLDAILEQDPK-COOH   | * |                    |
| KIIVDTYGGmAR                | NH2-KIIVDTYGGM<Mox>AR-COOH     | * |                    |
| KIIVDTYGGMAR                | NH2-KIIVDTYGGMAR-COOH          | * |                    |
| SLQEAVmEEIIPILPAEWLTSATK    | NH2-SLQEAVM<Mox>EEIIPILPAEWL   | * |                    |
| SLQEAVMEEIIPILPAEWLTSATK    | NH2-SLQEAVMEEIIPILPAEWLTSATK-  | * |                    |
| VACETYVK                    | NH2-VAC<Cmm*>ETYVK-COOH        | * |                    |
| VPSEQLTLLVR                 | NH2-VPSEQLTLLVR-COOH           | * |                    |
| EVNLLGQNVNAWR               | NH2-EVNLLGQNVNAWR-COOH         | * |                    |
| FVDVEITDVYPNSLR             | NH2-FVDVEITDVYPNSLR-COOH       | * |                    |
| INQQAmAWSR                  | NH2-INQQAM<Mox>AWSR-COOH       | * |                    |
| LVAIDGIDR                   | NH2-LVAIDGIDR-COOH             | * |                    |
| LYILQER                     | NH2-LYILQER-COOH               | * |                    |
| VAETPESVIAR                 | NH2-VAETPESVIAR-COOH           | * |                    |
| ASNQGEPVILDINADAGK          | NH2-ASNQGEPVILDINADAGK-COOH    | * |                    |
| AYADTVER                    | NH2-AYADTVER-COOH              | * |                    |
| GDMLSmEDVLEILR              | NH2-GDM<Mox>LSM<Mox>EDVLEILF   | * |                    |
| IIVVTSGK                    | NH2-IIVVTSGK-COOH              | * |                    |

|                       |                                        |   |                    |
|-----------------------|----------------------------------------|---|--------------------|
| IKLVGVIPEDQSVLR       | NH2-IKLVGVIPEDQSVLR-COOH               | * |                    |
| ILGILASK              | NH2-ILGILASK-COOH                      | * |                    |
| LVGVIPEDQSVLR         | NH2-LVGVIPEDQSVLR-COOH                 | * |                    |
| NLDLmGCER             | NH2-NLDLIM<Mox>GC<Cmm*>ER-COOH         | * |                    |
| NLDLIMGCER            | NH2-NLDLIMGC<Cmm*>ER-COOH              | * |                    |
| RAENGEEPIKEHLLLTR     | NH2-RAENGEEPIKEHLLLTR-COOH             | * |                    |
| TENLYILPASQTR         | NH2-TENLYILPASQTR-COOH                 | * |                    |
| TTSSAAIATGLAQK        | NH2-TTSSAAIATGLAQK-COOH                | * |                    |
| TVVIDFDIGLR           | NH2-TVVIDFDIGLR-COOH                   | * |                    |
| VLDDLK                | NH2-VLDDLK-COOH                        | * |                    |
| ALLDFFLSR             | NH2-ALLDFFLSR-COOH                     | * |                    |
| KNTANIAK              | NH2-KNTANIAK-COOH                      | * | Midlog 1st control |
| LQIIVAER              | NH2-LQIIVAER-COOH                      | * |                    |
| GIDGLTAQLK            | NH2-GIDGLTAQLK-COOH                    | * |                    |
| LKNEQPQIR             | NH2-LKNEQPQIR-COOH                     | * |                    |
| LmDEAAQK              | NH2-LM<Mox>DEAAQK-COOH                 | * |                    |
| LMDEAAQK              | NH2-LMDEAAQK-COOH                      | * |                    |
| QNEWGTLR              | NH2-QNEWGTLR-COOH                      | * |                    |
| TIVDQELLPYVQVK        | NH2-TIVDQELLPYVQVK-COOH                | * |                    |
| YAGALVLGQYYK          | NH2-YAGALVLGQYYK-COOH                  | * |                    |
| LTTAELPVIASLGIAEVPVIR | NH2-LTTAELPVIASLGIAEVPVIR-COOH         | * |                    |
| GNPCVEAVLEK           | NH2-GNPC<Cmm*>VEAVLEK-COOH             | * |                    |
| HVGVAPADAANALGSFINAR  | NH2-HVGVAPADAANALGSFINAR-COOH          | * |                    |
| IIAVLEPR              | NH2-IIAVLEPR-COOH                      | * |                    |
| WVLAVAGTHGK           | NH2-WVLAVAGTHGK-COOH                   | * |                    |
| GmVLTGGGALLR          | NH2-GM<Mox>VLTGGGALLR-COOH             | * |                    |
| GMVLTGGGALLR          | NH2-GMVLTGGGALLR-COOH                  | * |                    |
| IGGDRFDEAIINYVR       | NH2-IGGDRFDEAIINYVR-COOH               | * |                    |
| IKHEIGSAYPGDEV        | NH2-IKHEIGSAYPGDEV-COOH                | * |                    |
| LLMEETGIPVVAEDPLTCVAR | NH2-LLMEETGIPVVAEDPLTC<Cmm*>           | * |                    |
| NLAEGVPR              | NH2-NLAEGVPR-COOH                      | * |                    |
| NYGSLIGEATAER         | NH2-NYGSLIGEATAER-COOH                 | * |                    |
| VLVCVPVATQVER         | NH2-VLVC<Cmm*>VPVATQVER-COOH           | * |                    |
| <QGNHDHGTQYR          | #Gln->pyro-Glu (N-term Q)#-QGNHDHGTQYR | * |                    |
| EVCSGDTGHAEAVR        | NH2-EVC<Cmm*>SGDTGHAEAVR-COOH          | * |                    |
| HLVSPADALPGR          | NH2-HLVSPADALPGR-COOH                  | * |                    |
| SAIYPLTPEQDAAAR       | NH2-SAIYPLTPEQDAAAR-COOH               | * |                    |
| AIIDTPVLVR            | NH2-AIIDTPVLVR-COOH                    | * |                    |
| AQLETVDSAPVQALR       | NH2-AQLETVDSAPVQALR-COOH               | * |                    |
| QDNLLAAIWQDSK         | NH2-QDNLLAAIWQDSK-COOH                 | * |                    |
| QVGDLE                | NH2-QVGDLE-COOH                        | * |                    |
| SYGLAVAALAGVPK        | NH2-SYGLAVAALAGVPK-COOH                | * |                    |
| VGAADDLASGR           | NH2-VGAADDLASGR-COOH                   | * |                    |
| ALAQQLmQER            | NH2-ALAQQLM<Mox>QER-COOH               | * | Midlog 1st control |
| ALAQQLmQERG           | NH2-ALAQQLM<Mox>QERG-COOH              | * | Midlog 1st control |
| GVMAALLTPFDQQALDK     | NH2-GVMAALLTPFDQQALDK-COOH             | * |                    |
| LTLQINTLVTLPGVQALK    | NH2-LTLQINTLVTLPGVQALK-COOH            | * |                    |
| ATLLLLFEHVHGESR       | NH2-ATLLLLFEHVHGESR-COOH               | * |                    |



|                           |                                    |                      |
|---------------------------|------------------------------------|----------------------|
| GCGDSAITAHQR              | NH2-GC<Cmm*>GDSAITAHQR-COOH        | *                    |
| IADear                    | NH2-IADear-COOH                    | *                    |
| LANTAIDSDKVAEK            | NH2-LANTAIDSDKVAEK-COOH            | *                    |
| YAVLFDLLLK                | NH2-YAVLFDLLLK-COOH                | *                    |
| ALHQAAAGEmVLSEALTPVLAASL  | NH2-ALHQAAAGEM<Mox>VLSEALTPV       | *                    |
| ALHQAAAGEMVLSEALTPVLAASLR | NH2-ALHQAAAGEMVLSEALTPVLAASL       | *                    |
| LIAQGLPNK                 | NH2-LIAQGLPNK-COOH                 | *                    |
| RLDITESTVK                | NH2-RLDITESTVK-COOH                | *                    |
| DSDPEVLLEAIR              | NH2-DSDPEVLLEAIR-COOH              | *                    |
| ELDVLHELAQGLSNK           | NH2-ELDVLHELAQGLSNK-COOH           | *                    |
| EMFGAEEDPFSVLTER          | NH2-EMFGAEEDPFSVLTER-COOH          | *                    |
| GmSGLDTLNALR              | NH2-GM<Mox>SGLDTLNALR-COOH         | *                    |
| GMSGLDTLNALR              | NH2-GMSGLDTLNALR-COOH              | *                    |
| PEATPFQVMIVDDHPLMR        | NH2-PEATPFQVMIVDDHPLMR-COOH        | *                    |
| QIASVLNISEQTVK            | NH2-QIASVLNISEQTVK-COOH            | *                    |
| VAATILFLQQR               | NH2-VAATILFLQQR-COOH               | *                    |
| LVVDQEDADGR               | NH2-LVVDQEDADGR-COOH               | *                    |
| mDIISVALKR                | NH2-M<Mox>DIISVALKR-COOH           | * Midlog 1st control |
| SRLPQNITLTEV              | NH2-SRLPQNITLTEV-COOH              | *                    |
| ALREELVTLTGGQK            | NH2-ALREELVTLTGGQK-COOH            | *                    |
| LPASILVHENSYQPLDK         | NH2-LPASILVHENSYQPLDK-COOH         | *                    |
| LLANQEEGTQIR              | NH2-LLANQEEGTQIR-COOH              | *                    |
| NGGIR                     | NH2-NGGIR-COOH                     | *                    |
| ASVESNFALR                | NH2-ASVESNFALR-COOH                | *                    |
| EGGIYTPALR                | NH2-EGGIYTPALR-COOH                | *                    |
| FGYGYVNLK                 | NH2-FGYGYVNLK-COOH                 | *                    |
| GADVGITmIAR               | NH2-GADVGITM<Mox>IAR-COOH          | *                    |
| GADVGITMIAR               | NH2-GADVGITMIAR-COOH               | *                    |
| IDVIVQALAGAK              | NH2-IDVIVQALAGAK-COOH              | *                    |
| IPELAGIKDAAPDATFR         | NH2-IPELAGIKDAAPDATFR-COOH         | *                    |
| EKIFEALESALATATK          | NH2-EKIFEALESALATATK-COOH          | *                    |
| HQAEAHAAIDTFTK            | NH2-HQAEAHAAIDTFTK-COOH            | *                    |
| IEVPEIGEEVIEIK            | NH2-IEVPEIGEEVIEIK-COOH            | *                    |
| VQAVSTELGGER              | NH2-VQAVSTELGGER-COOH              | *                    |
| LLEELGQVEK                | NH2-LLEELGQVEK-COOH                | *                    |
| VAINEAIELAK               | NH2-VAINEAIELAK-COOH               | *                    |
| <QEVHGNGLSSYPHPK          | #Gln->pyro-Glu (N-term Q)#-QEVHGN  | *                    |
| <QIGIYSPNGQQYTPQDR        | #Gln->pyro-Glu (N-term Q)#-QIGIYSP | *                    |
| <QKLHGYP                  | #Gln->pyro-Glu (N-term Q)#-QKLHGY  | *                    |
| <QPNFTEKLELPSLQDFGALLEEQ  | #Gln->pyro-Glu (N-term Q)#-QPNFTE  | *                    |
| <QTVYAF LGDGEMDEPESK      | #Gln->pyro-Glu (N-term Q)#-QTVYAF  | *                    |
| AFLEGR                    | NH2-AFLEGR-COOH                    | *                    |
| ALNVmLK                   | NH2-ALNVM<Mox>LK-COOH              | * Midlog 1st control |
| ALNVMLK                   | NH2-ALNVMLK-COOH                   | * Midlog 1st control |
| AQYLIDQLLAEAR             | NH2-AQYLIDQLLAEAR-COOH             | * Midlog 1st control |
| AQYLIDQLLAEAR             | NH2-AQYLIDQLLAEAR-COOH             | * Midlog 1st control |
| ARNEQDGGDLVYFQGHISPGVYAR  | NH2-ARNEQDGGDLVYFQGHISPGVYAR       | *                    |
| ATVILAHTIK                | NH2-ATVILAHTIK-COOH                | * Midlog 1st control |



|                               |                                  |   |                    |
|-------------------------------|----------------------------------|---|--------------------|
| DGQDCERWNMLHPLETPR            | NH2-DGQDC<Cmm*>ERWNMLHPLET       | * |                    |
| DLELGGHmASFQSSATIYDVCFNH      | NH2-DLELGGHM<Mox>ASFQSSATIYD     | * |                    |
| DLELGGHMASFQSSATIYDVCFNHF     | NH2-DLELGGHMASFQSSATIYDVC<Cm     | * |                    |
| DRFNVPVSDADIEK                | NH2-DRFNVPVSDADIEK-COOH          | * |                    |
| DRFNVPVSDADIEKLPYITFPEGSEEH   | NH2-DRFNVPVSDADIEKLPYITFPEGSEE   | * |                    |
| DRLVPIADEAR                   | NH2-DRLVPIADEAR-COOH             | * |                    |
| DWLQAIESVIR                   | NH2-DWLQAIESVIR-COOH             | * | Midlog 1st control |
| DWLQAIESVIREEGVER             | NH2-DWLQAIESVIREEGVER-COOH       | * |                    |
| DYGVGSDVYSVTSFTELAR           | NH2-DYGVGSDVYSVTSFTELAR-COOH     | * | Midlog 1st control |
| EAAEILAK                      | NH2-EAAEILAK-COOH                | * | Midlog 1st control |
| EAAEILAKDYGVGSDVYSVTSFTELAF   | NH2-EAAEILAKDYGVGSDVYSVTSFTELA   | * | Midlog 1st control |
| EHFFGK                        | NH2-EHFFGK-COOH                  | * |                    |
| EHFFGKYPETAALVADWTDEQIWAL     | NH2-EHFFGKYPETAALVADWTDEQIWA     | * |                    |
| EISTTIAFVR                    | NH2-EISTTIAFVR-COOH              | * | Midlog 1st control |
| EKLDNLVFNCLQR                 | NH2-EKLDNLVFNCLQR<Cmm*>NLQR-C    | * | Midlog 1st control |
| EQVAYYKEDEK                   | NH2-EQVAYYKEDEK-COOH             | * | Midlog 1st control |
| FNIDADKVNPR                   | NH2-FNIDADKVNPR-COOH             | * | Midlog 1st control |
| FNVPVSDADIEKLPYITFPEGSEEH     | NH2-FNVPVSDADIEKLPYITFPEGSEEH    | * |                    |
| FPNDVDPIETR                   | NH2-FPNDVDPIETR-COOH             | * | Midlog 1st control |
| FPNDVDPIETRDWLQAIESVIR        | NH2-FPNDVDPIETRDWLQAIESVIR-CO    | * |                    |
| GAITIATR                      | NH2-GAITIATR-COOH                | * | Midlog 1st control |
| GFLIGGTSGR                    | NH2-GFLIGGTSGR-COOH              | * | Midlog 1st control |
| GGVNVAAGTGISNYINTIPVEEQPEY    | NH2-GGVNVAAGTGISNYINTIPVEEQPE    | * |                    |
| GGVNVAAGTGISNYINTIPVEEQPEY    | NH2-GGVNVAAGTGISNYINTIPVEEQPE    | * |                    |
| GIYKLETIEGSK                  | NH2-GIYKLETIEGSK-COOH            | * | Midlog 1st control |
| GKATVILAHTIK                  | NH2-GKATVILAHTIK-COOH            | * |                    |
| GKVQLLGSILR                   | NH2-GKVQLLGSILR-COOH             | * | Midlog 1st control |
| GYGmGDAAEGK                   | NH2-GYGM<Mox>GDAAEGK-COOH        | * |                    |
| GYMGDAAEGK                    | NH2-GYMGDAAEGK-COOH              | * | Midlog 1st control |
| HHFEVDASYVVVAALGELAK          | NH2-HHFEVDASYVVVAALGELAK-COO     | * |                    |
| HHFEVDASYVVVAALGELAKR         | NH2-HHFEVDASYVVVAALGELAKR-CO     | * |                    |
| IGDLCWAAGDQQR                 | NH2-IGDLC<Cmm*>WAAGDQQR-C        | * | Midlog 1st control |
| IINELEGIFEGAGWNVIK            | NH2-IINELEGIFEGAGWNVIK-COOH      | * |                    |
| IYAAFK                        | NH2-IYAAFK-COOH                  | * | Midlog 1st control |
| KDLELGGHMASFQSSATIYDVCFNH     | NH2-KDLELGGHMASFQSSATIYDVC<C     | * |                    |
| KGGVNVAAGTGISNYINTIPVEEQPE    | NH2-KGGVNVAAGTGISNYINTIPVEEQP    | * | Midlog 1st control |
| KGGVNVAAGTGISNYINTIPVEEQPE    | NH2-KGGVNVAAGTGISNYINTIPVEEQP    | * |                    |
| KGIYKLETIEGSK                 | NH2-KGIYKLETIEGSK-COOH           | * |                    |
| LDGPVTGNGK                    | NH2-LDGPVTGNGK-COOH              | * |                    |
| LDNLVFNCLQR                   | NH2-LDNLVFNCLQR<Cmm*>NLQR-CO     | * |                    |
| LELPSLQDFGALLEEQSK            | NH2-LELPSLQDFGALLEEQSK-COOH      | * |                    |
| LELPSLQDFGALLEEQSKKEISTTIAFVR | NH2-LELPSLQDFGALLEEQSKKEISTTIAFV | * |                    |
| LETIEGSK                      | NH2-LETIEGSK-COOH                | * | Midlog 1st control |
| LFAEQVR                       | NH2-LFAEQVR-COOH                 | * | Midlog 1st control |
| LHGYLPSR                      | NH2-LHGYLPSR-COOH                | * |                    |
| LIQLmNETVDGDYQTFK             | NH2-LIQLM<Mox>NETVDGDYQTFK-C     | * |                    |
| LIQLMNETVDGDYQTFK             | NH2-LIQLMNETVDGDYQTFK-COOH       | * | Midlog 1st control |
| LmPEFWQFPTVSmGLGPIGAIYQ       | NH2-LM<Mox>PEFWQFPTVSM<Mox>      | * |                    |

|                             |                                   |   |                    |
|-----------------------------|-----------------------------------|---|--------------------|
| LmPEFWQFPTVSMGLGPIGAIYQ     | NH2-LM<Mox>PEFWQFPTVSMGLGPI       | * |                    |
| LMPEFWQFPTVSmGLGPIGAIYQA    | NH2-LMPEFWQFPTVSM<Mox>GLGPI       | * |                    |
| LMPEFWQFPTVSMGLGPIGAIYQAK   | NH2-LMPEFWQFPTVSMGLGPIGAIYQA      | * |                    |
| LPYITFPEGSEEHTYLHAQR        | NH2-LPYITFPEGSEEHTYLHAQR-COOH     | * |                    |
| LTQEQLDNFR                  | NH2-LTQEQLDNFR-COOH               | * | Midlog 1st control |
| LTQEQLDNFRQEVHGNGLSSYPHPK   | NH2-LTQEQLDNFRQEVHGNGLSSYPHP      | * |                    |
| LVPIIADEAR                  | NH2-LVPIIADEAR-COOH               | * | Midlog 1st control |
| NEQDGGDLVYFQGHISPGVYAR      | NH2-NEQDGGDLVYFQGHISPGVYAR-C      | * | Midlog 1st control |
| QENVYYYITTLNENYHMPAMPEGA    | NH2-QENVYYYITTLNENYHMPAMPEGA      | * |                    |
| QENVYYYITTLNENYHMPAMPEGA    | NH2-QENVYYYITTLNENYHMPAMPEGA      | * |                    |
| QEVHGNGLSSYPHPK             | NH2-QEVHGNGLSSYPHPK-COOH          | * |                    |
| QIGIYSPNGQQYTPQDR           | NH2-QIGIYSPNGQQYTPQDR-COOH        | * | Midlog 1st control |
| QIGIYSPNGQQYTPQDREQVAYYKEI  | NH2-QIGIYSPNGQQYTPQDREQVAYYK      | * |                    |
| QKLHGYP                     | NH2-QKLHGYP-COOH                  | * |                    |
| QPNFTEKLELPSLQDFGALLEEQSK   | NH2-QPNFTEKLELPSLQDFGALLEEQSK     | * |                    |
| QPNFTEKLELPSLQDFGALLEEQSKEI | NH2-QPNFTEKLELPSLQDFGALLEEQSK     | * |                    |
| QTVYAFLGDGEmDEPESK          | NH2-QTVYAFLGDGEM<Mox>DEPESK-      | * | Midlog 1st control |
| QTVYAFLGDGEMDEPESK          | NH2-QTVYAFLGDGEMDEPESK-COOH       | * | Midlog 1st control |
| SERFPNDVDPIETR              | NH2-SERFPNDVDPIETR-COOH           | * | Midlog 1st control |
| TFGmEGLFR                   | NH2-TFGM<Mox>EGLFR-COOH           | * | Midlog 1st control |
| TFGMEGLFR                   | NH2-TFGMEGLFR-COOH                | * | Midlog 1st control |
| TYVPADDYR                   | NH2-TYVPADDYR-COOH                | * | Midlog 1st control |
| VLGTDGFR                    | NH2-VLGTDFGR-COOH                 | * | Midlog 1st control |
| VPYIAQVmNDAPAVASTDymK       | NH2-VPYIAQVM<Mox>NDAPAVASTD       | * | Midlog 1st control |
| VPYIAQVmNDAPAVASTDymK       | NH2-VPYIAQVM<Mox>NDAPAVASTD       | * |                    |
| VPYIAQVMNDAPAVASTDymK       | NH2-VPYIAQVMNDAPAVASTDYM<M        | * | Midlog 1st control |
| VPYIAQVMNDAPAVASTDymK       | NH2-VPYIAQVMNDAPAVASTDYMK-C       | * | Midlog 1st control |
| VQLLGSISILR                 | NH2-VQLLGSISILR-COOH              | * | Midlog 1st control |
| VVADAIK                     | NH2-VVADAIK-COOH                  | * |                    |
| WDELLR                      | NH2-WDELLR-COOH                   | * |                    |
| WDELLRK                     | NH2-WDELLRK-COOH                  | * |                    |
| WNAImTVLR                   | NH2-WNAIM<Mox>TVLR-COOH           | * | Midlog 1st control |
| WNAIMTVLR                   | NH2-WNAIMTVLR-COOH                | * | Midlog 1st control |
| WNmLHPLETPR                 | NH2-WNM<Mox>LHPLETPR-COOH         | * |                    |
| WNMLHPLETPR                 | NH2-WNMLHPLETPR-COOH              | * |                    |
| YPETAALVADWTDEQIWALNR       | NH2-YPETAALVADWTDEQIWALNR-CC      | * |                    |
| <QEAAAPAPAAK                | #Gln->pyro-Glu (N-term Q)#-QEAAAP | * |                    |
| <QEAAAPAAAPAAAGVK           | #Gln->pyro-Glu (N-term Q)#-QEAAPA | * | Midlog 1st control |
| AEAAPAATGGGIPGmLPWPK        | NH2-AEAAPAATGGGIPGM<Mox>LPW       | * | Midlog 1st control |
| AEAAPAATGGGIPGMLPWPK        | NH2-AEAAPAATGGGIPGMLPWPK-CO       | * | Midlog 1st control |
| AEAPAAAPAAK                 | NH2-AEAPAAAPAAK-COOH              | * | Midlog 1st control |
| AEGKSEFAENDAYVHATPLIR       | NH2-AEGKSEFAENDAYVHATPLIR-CO      | * | Midlog 1st control |
| AIEIKVPDIGADEVTEILVK        | NH2-AIEIKVPDIGADEVTEILVK-COOH     | * |                    |
| AVAAALEQmPR                 | NH2-AVAAALEQM<Mox>PR-COOH         | * | Midlog 1st control |
| AVAAALEQMPR                 | NH2-AVAAALEQMPR-COOH              | * | Midlog 1st control |
| DVNVPDIGSDEVTEILVK          | NH2-DVNVPDIGSDEVTEILVK-COOH       | * | Midlog 1st control |
| EAPAAAPAAAAK                | NH2-EAPAAAPAAAAK-COOH             | * | Midlog 1st control |

|                                        |                                        |   |                    |
|----------------------------------------|----------------------------------------|---|--------------------|
| EFGVNLAK                               | NH2-EFGVNLAK-COOH                      | * | Midlog 1st control |
| ELMTISK                                | NH2-ELMTISK-COOH                       | * |                    |
| EVNVPDIGGDEVEVTEV <b>m</b> VK          | NH2-EVNVPDIGGDEVEVTEVM<Mox>            | * | Midlog 1st control |
| EVNVPDIGGDEVEVTEVMVK                   | NH2-EVNVPDIGGDEVEVTEVMVK-COOH          | * | Midlog 1st control |
| FGEIEEVELGR                            | NH2-FGEIEEVELGR-COOH                   | * | Midlog 1st control |
| FITIINNTLSDIR                          | NH2-FITIINNTLSDIR-COOH                 | * | Midlog 1st control |
| FITIINNTLSDIRR                         | NH2-FITIINNTLSDIRR-COOH                | * | Midlog 1st control |
| FNSSLSEGDQR                            | NH2-FNSSLSEGDQR-COOH                   | * | Midlog 1st control |
| FNSSLSEGDQRRLTK                        | NH2-FNSSLSEGDQRRLTK-COOH               | * | Midlog 1st control |
| GIIELSR                                | NH2-GIIELSR-COOH                       | * |                    |
| ILREDVQAYVK                            | NH2-ILREDVQAYVK-COOH                   | * | Midlog 1st control |
| ISGANLSR                               | NH2-ISGANLSR-COOH                      | * | Midlog 1st control |
| ITPVV <b>F</b> mK                      | NH2-ITPVVFIM<Mox>K-COOH                | * | Midlog 1st control |
| ITPVVFIMKAVAAAAL <b>E</b> m <b>P</b> R | NH2-ITPVVFIMKAVAAAAL <b>E</b> m<Mox>P  | * |                    |
| ITPVVFIMK                              | NH2-ITPVVFIMK-COOH                     | * | Midlog 1st control |
| KEAAPAAAPAAAAAK                        | NH2-KEAAPAAAPAAAAAK-COOH               | * | Midlog 1st control |
| KGIIELSR                               | NH2-KGIIELSR-COOH                      | * | Midlog 1st control |
| KYINIGVAVDTPNGLVVPVFK                  | NH2-KYINIGVAVDTPNGLVVPVFK-COOH         | * |                    |
| KYINIGVAVDTPNGLVVPVFKDVNK              | NH2-KYINIGVAVDTPNGLVVPVFKDVNK-COOH     | * |                    |
| <b>L</b> m <b>L</b> PISLSFDHR          | NH2-LM<Mox>LPISLSFDHR-COOH             | * | Midlog 1st control |
| LMLPISLSFDHR                           | NH2-LMLPISLSFDHR-COOH                  | * | Midlog 1st control |
| NWV <b>m</b> IPHVTHFDKTDITELEAFR       | NH2-NWVM<Mox>IPHVTHFDKTDITEL           | * |                    |
| NWV <b>m</b> IPHVTHFDKTDITELEAFRK      | NH2-NWVM<Mox>IPHVTHFDKTDITEL           | * |                    |
| NWVMIPHVTHFDK                          | NH2-NWVMIPHVTHFDK-COOH                 | * |                    |
| NWVMIPHVTHFDKTDITELEAFR                | NH2-NWVMIPHVTHFDKTDITELEAFR-COOH       | * |                    |
| NWVMIPHVTHFDKTDITELEAFRK               | NH2-NWVMIPHVTHFDKTDITELEAFRK-COOH      | * |                    |
| QEAAAPAPAAK                            | NH2-QEAAAPAPAAK-COOH                   | * | Midlog 1st control |
| QEAAAPAAAPAPAAGVK                      | NH2-QEAAAPAAAPAPAAGVK-COOH             | * | Midlog 1st control |
| RAEAAPAATGGGIPG <b>m</b> LPWP <b>K</b> | NH2-RAEAAPAATGGGIPGM<Mox>LPW           | * | Midlog 1st control |
| RAEAAPAATGGGIPGMLPW <b>K</b>           | NH2-RAEAAPAATGGGIPGMLPW <b>K</b> -COOH | * | Midlog 1st control |
| <b>S</b> A <b>m</b> EPVWNGK            | NH2-SAM<Mox>EPVWNGK-COOH               | * | Midlog 1st control |
| <b>S</b> A <b>m</b> EPVWNGKEFVPR       | NH2-SAM<Mox>EPVWNGKEFVPR-COOH          | * | Midlog 1st control |
| SAMEPVWNGK                             | NH2-SAMEPVWNGK-COOH                    | * | Midlog 1st control |
| SAMEPVWNGKEFVPR                        | NH2-SAMEPVWNGKEFVPR-COOH               | * | Midlog 1st control |
| SEFAENDAYVHATPLIR                      | NH2-SEFAENDAYVHATPLIR-COOH             | * | Midlog 1st control |
| SEFAENDAYVHATPLIRR                     | NH2-SEFAENDAYVHATPLIRR-COOH            | * | Midlog 1st control |
| TDITELEAFR                             | NH2-TDITELEAFR-COOH                    | * | Midlog 1st control |
| TDITELEAFRK                            | NH2-TDITELEAFRK-COOH                   | * | Midlog 1st control |
| TGSL <b>m</b> IFEVEGAAPAAAPAK          | NH2-TGSLIM<Mox>IFEVEGAAPAAAPAK         | * | Midlog 1st control |
| TGSL <b>m</b> IFEVEGAAPAAAPAKQEA       | NH2-TGSLIM<Mox>IFEVEGAAPAAAPAKQEA      | * | Midlog 1st control |
| TGSLIMIFEVEGAAPAAAPAK                  | NH2-TGSLIMIFEVEGAAPAAAPAK-COOH         | * |                    |
| TGSLIMIFEVEGAAPAAAPAKQEAA              | NH2-TGSLIMIFEVEGAAPAAAPAKQEAA          | * |                    |
| TQTGALIMIFDSADGAADAAPAQAE              | NH2-TQTGALIMIFDSADGAADAAPAQAE          | * |                    |
| TQTGALIMIFDSADGAADAAPAQAE              | NH2-TQTGALIMIFDSADGAADAAPAQAE          | * |                    |
| VDFSKFGEIEEVELGR                       | NH2-VDFSKFGEIEEVELGR-COOH              | * | Midlog 1st control |
| VIDGADGAR                              | NH2-VIDGADGAR-COOH                     | * | Midlog 1st control |
| VNVGDKVSTGSL <b>m</b> VFEVAGEAGA       | NH2-VNVGDKVSTGSLIM<Mox>VFEVA           | * |                    |

|                           |                               |   |                    |
|---------------------------|-------------------------------|---|--------------------|
| VNVGDKVSTGSLIMVFEVAGEAGAA | NH2-VNVGDKVSTGSLIMVFEVAGEAGAA | * |                    |
| VPDIGADEVEITEILVK         | NH2-VPDIGADEVEITEILVK-COOH    | * | Midlog 1st control |
| VSTGSLImVFEVAGEAGAAAPAAK  | NH2-VSTGSLIM<Mox>VFEVAGEAGAA  | * |                    |
| VSTGSLIMVFEVAGEAGAAAPAAK  | NH2-VSTGSLIMVFEVAGEAGAAAPAAK  | * |                    |
| VSVGDKTQTGALImIFDSADGAAD  | NH2-VSVGDKTQTGALIM<Mox>IFDSA  | * |                    |
| VSVGDKTQTGALImIFDSADGAAD  | NH2-VSVGDKTQTGALIM<Mox>IFDSA  | * |                    |
| VSVGDKTQTGALIMIFDSADGAADA | NH2-VSVGDKTQTGALIMIFDSADGAAD  | * |                    |
| VSVGDKTQTGALIMIFDSADGAADA | NH2-VSVGDKTQTGALIMIFDSADGAAD  | * |                    |
| YINIGVAVDTPNGLVVPVFK      | NH2-YINIGVAVDTPNGLVVPVFK-COOH | * |                    |
| YINIGVAVDTPNGLVVPVFKDVNK  | NH2-YINIGVAVDTPNGLVVPVFKDVNK  | * |                    |
| YINIGVAVDTPNGLVVPVFKDVNKK | NH2-YINIGVAVDTPNGLVVPVFKDVNKI | * |                    |
| ATLKEGQAALDQLYSQLSNLDPK   | NH2-ATLKEGQAALDQLYSQLSNLDPK   | * |                    |
| IGSDAYNQGLSER             | NH2-IGSDAYNQGLSER-COOH        | * |                    |
| RAQSVVDYLISK              | NH2-RAQSVVDYLISK-COOH         | * |                    |
| SIDVQISR                  | NH2-SIDVQISR-COOH             | * |                    |
| YLTEQGFQVR                | NH2-YLTEQGFQVR-COOH           | * |                    |
| ETGQSFLDNILSR             | NH2-ETGQSFLDNILSR-COOH        | * | Midlog 1st control |
| FEEEGIFNR                 | NH2-FEEEGIFNR-COOH            | * | Midlog 1st control |
| GQAHWEGDIKR               | NH2-GQAHWEGDIKR-COOH          | * |                    |
| IAPPDEHAASAGGLAVGILGALK   | NH2-IAPPDEHAASAGGLAVGILGALK-C | * |                    |
| EAEPEIYNAIR               | NH2-EAEPEIYNAIR-COOH          | * |                    |
| EQGLNSENFAFNTER           | NH2-EQGLNSENFAFNTER-COOH      | * |                    |
| GVLTLNGAVAVDTGIFTGR       | NH2-GVLTLNGAVAVDTGIFTGR-COOH  | * |                    |
| LFIDNFDKYTDPAGAALVAAGPK   | NH2-LFIDNFDKYTDPAGAALVAAGPK-  | * |                    |
| LFVVDAFGANPDTR            | NH2-LFVVD AFC<Cmm*>GANPDTR-CC | * |                    |
| VIFLTADAFGLPPVSR          | NH2-VIFLTADAFGLPPVSR-COOH     | * |                    |
| GTGDLFCAQLISGLLK          | NH2-GTGDLFC<Cmm*>AQLISGLLK-CC | * |                    |
| ILAEWLTALR                | NH2-ILAEWLTALR-COOH           | * |                    |
| KPVVLQAHLDMVPQK           | NH2-KPVVLQAHLDMVPQK-COOH      | * |                    |
| LIDFNGGTLR                | NH2-LIDFNGGTLR-COOH           | * |                    |
| LLNATPNGVIR               | NH2-LLNATPNGVIR-COOH          | * |                    |
| ADGIGSLLPAAR              | NH2-ADGIGSLLPAAR-COOH         | * |                    |
| ALQLGIEASNINPK            | NH2-ALQLGIEASNINPK-COOH       | * | Midlog 1st control |
| GNIGYIGVPPER              | NH2-GNIGYIGVPPER-COOH         | * | Midlog 1st control |
| HFDVDAFDAR                | NH2-HFDVDAFDAR-COOH           | * | Midlog 1st control |
| mMEIAKK                   | NH2-M<Mox>MEIAKK-COOH         | * |                    |
| MmEIAKK                   | NH2-MM<Mox>EIAKK-COOH         | * |                    |
| ALIPFGGIK                 | NH2-ALIPFGGIK-COOH            | * |                    |
| DAIPTQSVLTITSNVVYGK       | NH2-DAIPTQSVLTITSNVVYGK-COOH  | * |                    |
| GAVASLTSVAK               | NH2-GAVASLTSVAK-COOH          | * |                    |
| GDWQNEVNVR                | NH2-GDWQNEVNVR-COOH           | * |                    |
| IVGLQTEAPLKR              | NH2-IVGLQTEAPLKR-COOH         | * |                    |
| LATAWEGFTK                | NH2-LATAWEGFTK-COOH           | * |                    |
| LREEIAEQHR                | NH2-LREEIAEQHR-COOH           | * |                    |
| SGVLTGLPDAYGR             | NH2-SGVLTGLPDAYGR-COOH        | * |                    |
| TMACGIAGLSVAADSLSAIK      | NH2-TMAC<Cmm*>GIAGLSVAADSLSA  | * |                    |
| TSTFLDVYIER               | NH2-TSTFLDVYIER-COOH          | * |                    |
| VALYGIDYLMK               | NH2-VALYGIDYLMK-COOH          | * |                    |

|                             |                                        |   |                    |
|-----------------------------|----------------------------------------|---|--------------------|
| VDDLAVDLVER                 | NH2-VDDLAVDLVER-COOH                   | * |                    |
| ADEQILDIGDASAQELAEILK       | NH2-ADEQILDIGDASAQELAEILK-COOH         | * |                    |
| ADLNVPVKDGK                 | NH2-ADLNVPVKDGK-COOH                   | * | Midlog 1st control |
| ASLPTIELALK                 | NH2-ASLPTIELALK-COOH                   | * | Midlog 1st control |
| DYLDGVDVAEGELVVLENVR        | NH2-DYLDGVDVAEGELVVLENVR-COOH          | * |                    |
| FADVACAGPLLAELDALGK         | NH2-FADVAC<Cmm*>AGPLLAELDALGK-COOH     | * | Midlog 1st control |
| IADQLIVGGGIANTFIAAQGHVGVK   | NH2-IADQLIVGGGIANTFIAAQGHVGVK-COOH     | * | Midlog 1st control |
| ISYISTGGGAFLEFVEGK          | NH2-ISYISTGGGAFLEFVEGK-COOH            | * | Midlog 1st control |
| LLTTCNIPVPSDVR              | NH2-LLTTC<Cmm*>NIPVPSDVR-COOH          | * | Midlog 1st control |
| LTVLDSLSK                   | NH2-LTVLDSLSK-COOH                     | * | Midlog 1st control |
| LVKDYLDGVDVAEGELVVLENVR     | NH2-LVKDYLDGVDVAEGELVVLENVR-COOH       | * |                    |
| mTDLDLAGK                   | NH2-M<Mox>TDLDLAGK-COOH                | * | Midlog 1st control |
| MTDLDLAGKR                  | NH2-MTDLDLAGKR-COOH                    | * |                    |
| SLYEADLVDEAK                | NH2-SLYEADLVDEAK-COOH                  | * | Midlog 1st control |
| SLYEADLVDEAKR               | NH2-SLYEADLVDEAKR-COOH                 | * | Midlog 1st control |
| SVNDVKADEQILDIGDASAQELAEILI | NH2-SVNDVKADEQILDIGDASAQELAEILI-COOH   | * |                    |
| TILWNGPVGVFEPNFR            | NH2-TILWNGPVGVFEPNFR-COOH              | * |                    |
| VATEFSETAPATLK              | NH2-VATEFSETAPATLK-COOH                | * | Midlog 1st control |
| VLPAVAmLEER                 | NH2-VLPAVAM<Mox>LEER-COOH              | * | Midlog 1st control |
| VLPAVAMLEER                 | NH2-VLPAVAMLEER-COOH                   | * | Midlog 1st control |
| YAALCDVFM DAFGTAHR          | NH2-YAALC<Cmm*>DVFVM<Mox>DAFGTAHR-COOH | * | Midlog 1st control |
| YAALCDVFM DAFGTAHR          | NH2-YAALC<Cmm*>DVFVMDAFGTAHR-COOH      | * | Midlog 1st control |
| ANALLADGLK                  | NH2-ANALLADGLK-COOH                    | * |                    |
| LQAAATSAQK                  | NH2-LQAAATSAQK-COOH                    | * |                    |
| TLVSSAMIDR                  | NH2-TLVSSAMIDR-COOH                    | * |                    |
| GQGYLFELR                   | NH2-GQGYLFELR-COOH                     | * |                    |
| SNDVSLPILVLTAR              | NH2-SNDVSLPILVLTAR-COOH                | * |                    |
| VLVVEDNALLR                 | NH2-VLVVEDNALLR-COOH                   | * |                    |
| LIPAADISEQISTAGK            | NH2-LIPAADISEQISTAGK-COOH              | * | Midlog 1st control |
| SDGAEVAVSK                  | NH2-SDGAEVAVSK-COOH                    | * |                    |
| AAVAGIAMGLVK                | NH2-AAVAGIAM<Mox>GLVK-COOH             | * |                    |
| AAVAGIAMGLVK                | NH2-AAVAGIAMGLVK-COOH                  | * | Midlog 1st control |
| ALTEETGTTIEIEDDGTVK         | NH2-ALTEETGTTIEIEDDGTVK-COOH           | * |                    |
| DAQVLDELmGER                | NH2-DAQVLDELM<Mox>GER-COOH             | * |                    |
| DAQVLDELMGER                | NH2-DAQVLDELMGER-COOH                  | * |                    |
| DGISALQMDIK                 | NH2-DGISALQMDIK-COOH                   | * |                    |
| EATEQSQPAAAPEAPAAEQGE       | NH2-EATEQSQPAAAPEAPAAEQGE-COOH         | * |                    |
| EGLVHISQIADK                | NH2-EGLVHISQIADK-COOH                  | * |                    |
| EGLVHISQIADKR               | NH2-EGLVHISQIADKR-COOH                 | * |                    |
| EGRPSEGETLIAR               | NH2-EGRPSEGETLIAR-COOH                 | * |                    |
| EImQVALNQAK                 | NH2-EIM<Mox>QVALNQAK-COOH              | * | Midlog 1st control |
| EIMQVALNQAK                 | NH2-EIMQVALNQAK-COOH                   | * | Midlog 1st control |
| GDISEFAPR                   | NH2-GDISEFAPR-COOH                     | * | Midlog 1st control |
| GETQALVTATLGTAR             | NH2-GETQALVTATLGTAR-COOH               | * | Midlog 1st control |
| INPDKIKDVIGK                | NH2-INPDKIKDVIGK-COOH                  | * |                    |
| IVDFGAFVAIGGGK              | NH2-IVDFGAFVAIGGGK-COOH                | * |                    |
| LHILGVmEQAINAPR             | NH2-LHILGVM<Mox>EQAINAPR-COOH          | * |                    |
| LHILGVMEQAINAPR             | NH2-LHILGVMEQAINAPR-COOH               | * |                    |

|                       |                                |   |                    |
|-----------------------|--------------------------------|---|--------------------|
| REGRPSEGETLIAR        | NH2-REGRPSEGETLIAR-COOH        | * |                    |
| VGYINDQYVLNPTQDELKESK | NH2-VGYINDQYVLNPTQDELKESK-COOH | * |                    |
| VTDYLQMGQEVVVK        | NH2-VTDYLQMGQEVVVK-COOH        | * |                    |
| WDWQPEPVNEALNAR       | NH2-WDWQPEPVNEALNAR-COOH       | * |                    |
| YAQVDVIK              | NH2-YAQVDVIK-COOH              | * | Midlog 1st control |
| ATKEPIKNEANGLK        | NH2-ATKEPIKNEANGLK-COOH        | * |                    |
| EGFYNTIFHR            | NH2-EGFYNTIFHR-COOH            | * |                    |
| TFDDKAPETVK           | NH2-TFDDKAPETVK-COOH           | * |                    |
| VINGFmIQGGGFEPGmK     | NH2-VINGFM<Mox>IQGGGFEPGM<M    | * |                    |
| AFDFACLPNEGVGLAR      | NH2-AFDFAC<Cmm*>LPNEGVGLAR-C   | * |                    |
| ALLEFDDQEPQLQNEIR     | NH2-ALLEFDDQEPQLQNEIR-COOH     | * |                    |
| ALLSMAIR              | NH2-ALLSMAIR-COOH              | * |                    |
| ASAIVTNR              | NH2-ASAIVTNR-COOH              | * |                    |
| AVVEELAR              | NH2-AVVEELAR-COOH              | * |                    |
| DIFSLTNEEVQELAK       | NH2-DIFSLTNEEVQELAK-COOH       | * |                    |
| EFYVGR                | NH2-EFYVGR-COOH                | * |                    |
| ELGIPAVVGCGDATER      | NH2-ELGIPAVVGC<Cmm*>GDATER-C   | * |                    |
| GVALSAGVQR            | NH2-GVALSAGVQR-COOH            | * |                    |
| HVFASLFNDR            | NH2-HVFASLFNDR-COOH            | * |                    |
| IEDVPQEQR             | NH2-IEDVPQEQR-COOH             | * |                    |
| KASAIVTNR             | NH2-KASAIVTNR-COOH             | * |                    |
| LEFIINR               | NH2-LEFIINR-COOH               | * |                    |
| LFIVQARPETVR          | NH2-LFIVQARPETVR-COOH          | * |                    |
| LTEGIATLGAAFYPK       | NH2-LTEGIATLGAAFYPK-COOH       | * |                    |
| MIGVHPR               | NH2-MIGVHPR-COOH               | * |                    |
| MVYAPTQEHGK           | NH2-MVYAPTQEHGK-COOH           | * |                    |
| QAVQIEK               | NH2-QAVQIEK-COOH               | * |                    |
| SSSVETMPDLPLK         | NH2-SSSVETMPDLPLK-COOH         | * |                    |
| TCHAAIAR              | NH2-TC<Cmm*>HAAIAR-COOH        | * |                    |
| VIHDISEmNR            | NH2-VIHDISEM<Mox>NR-COOH       | * |                    |
| VIHDISEMNR            | NH2-VIHDISEMNR-COOH            | * |                    |
| VmmNVGNPDR            | NH2-VM<Mox>M<Mox>NVGNPDR-C     | * |                    |
| VMMNVGNPDR            | NH2-VMMNVGNPDR-COOH            | * |                    |
| EAAATAGEKEDAPR        | NH2-EAAATAGEKEDAPR-COOH        | * |                    |
| IGIFQDLVDR            | NH2-IGIFQDLVDR-COOH            | * |                    |
| VAGEmNLSK             | NH2-VAGEM<Mox>NLSK-COOH        | * |                    |
| IIGALPYLYEINLR        | NH2-IIGALPYLYEINLR-COOH        | * |                    |
| ALLLKEDEVIDR          | NH2-ALLLKEDEVIDR-COOH          | * |                    |
| ALLLKEDEVIDRK         | NH2-ALLLKEDEVIDRK-COOH         | * |                    |
| AVQEQVASEK            | NH2-AVQEQVASEK-COOH            | * |                    |
| EENPFLGWR             | NH2-EENPFLGWR-COOH             | * |                    |
| IMFPMIISVEEVR         | NH2-IMFPMIISVEEVR-COOH         | * |                    |
| ISADQVDQEVER          | NH2-ISADQVDQEVER-COOH          | * |                    |
| QVIDASHAEGK           | NH2-QVIDASHAEGK-COOH           | * |                    |
| VLAEQALAQPTTDELMTLVNK | NH2-VLAEQALAQPTTDELMTLVNK-CO   | * |                    |
| VLGFITDAGGR           | NH2-VLGFITDAGGR-COOH           | * |                    |
| NTNITGVIVNK           | NH2-NTNITGVIVNK-COOH           | * |                    |
| IVGDGIAIKPTGNK        | NH2-IVGDGIAIKPTGNK-COOH        | * |                    |



|                            |                                |   |
|----------------------------|--------------------------------|---|
| LSGSVTVGETPVIR             | NH2-LSGSVTVGETPVIR-COOH        | * |
| mVAPVDGTIGK                | NH2-M<Mox>VAPVDGTIGK-COOH      | * |
| STLTPVVISNmDEIKELIK        | NH2-STLTPVVISNM<Mox>DEIKELIK-C | * |
| STLTPVVISNMDEIKELIK        | NH2-STLTPVVISNMDEIKELIK-COOH   | * |
| VGDTVIEFDLPLEEK            | NH2-VGDTVIEFDLPLEEK-COOH       | * |
| VKVGDTVIEFDLPLEEK          | NH2-VKVGDTVIEFDLPLEEK-COOH     | * |
| LmAELE                     | NH2-LM<Mox>AELE-COOH           | * |
| mFQQEVTITAPNGLHTR          | NH2-M<Mox>FQQEVTITAPNGLHTR-C   | * |
| GVVHDTWPQALIAR             | NH2-GVVHDTWPQALIAR-COOH        | * |
| LQQPDIVETLITLPETQLK        | NH2-LQQPDIVETLITLPETQLK-COOH   | * |
| SEVLTHIGNEMLAK             | NH2-SEVLTHIGNEMLAK-COOH        | * |
| SGISFVDR                   | NH2-SGISFVDR-COOH              | * |
| SGISFVDRSEVLTHIGNEMLAK     | NH2-SGISFVDRSEVLTHIGNEMLAK-CO  | * |
| SSAIYLLRPTNK               | NH2-SSAIYLLRPTNK-COOH          | * |
| YVLDSDE                    | NH2-YVLDSDE-COOH               | * |
| ILTILQG                    | NH2-ILTILQG-COOH               | * |
| SFGDIPLVHGMmPFISGIGIEALQNK | NH2-SFGDIPLVHGM<Mox>PFISGIGIEA | * |
| VNEIETYMDGVHLICTTAK        | NH2-VNEIETYMDGVHLIC<Cmm*>TTA   | * |
| YEVPIIEAFPETLAGEK          | NH2-YEVPIIEAFPETLAGEK-COOH     | * |
| QLSLPPQVVFMAILTR           | NH2-QLSLPPQVVFMAILTR-COOH      | * |
| AEAVDYQK                   | NH2-AEAVDYQK-COOH              | * |
| AVQLNSLSGFCLTK             | NH2-AVQLNSLSGFC<Cmm*>LTK-COO   | * |
| ENVTSIINGVVLSPAALmK        | NH2-ENVTSIINGVVLSPAALM<Mox>I   | * |
| ENVTSIINGVVLSPAALMK        | NH2-ENVTSIINGVVLSPAALMK-COOH   | * |
| EVTTPLAADDWK               | NH2-EVTTPLAADDWK-COOH          | * |
| GNNVVVLGTQWGDEGK           | NH2-GNNVVVLGTQWGDEGK-COOH      | * |
| GVEPIYETMPGWSESTFGVK       | NH2-GVEPIYETMPGWSESTFGVK-COO   | * |
| IEELTGVPIDIISTGPDR         | NH2-IEELTGVPIDIISTGPDR-COOH    | * |
| IVDLLTER                   | NH2-IVDLLTER-COOH              | * |
| LDVLDGLK                   | NH2-LDVLDGLK-COOH              | * |
| LDVLDGLKEVK                | NH2-LDVLDGLKEVK-COOH           | * |
| LKEVMEYHNFQLVNYYK          | NH2-LKEVMEYHNFQLVNYYK-COOH     | * |
| LLLSEACPLILDYHVALDNAR      | NH2-LLLSEAC<Cmm*>PLILDYHVALDN  | * |
| QGNEFGATTGR                | NH2-QGNEFGATTGR-COOH           | * |
| RIEELTGVPIDIISTGPDR        | NH2-RIEELTGVPIDIISTGPDR-COOH   | * |
| SGLPQAALNYIK               | NH2-SGLPQAALNYIK-COOH          | * |
| TETMILRDPFDA               | NH2-TETMILRDPFDA-COOH          | * |
| TGWLDTVAVR                 | NH2-TGWLDTVAVR-COOH            | * |
| TVLHLIPSGILR               | NH2-TVLHLIPSGILR-COOH          | * |
| VGAGPFPELFDETGEFLCK        | NH2-VGAGPFPELFDETGEFLC<Cmm*    | * |
| VGDLFDKETFAEK              | NH2-VGDLFDKETFAEK-COOH         | * |
| YQGGHNAGHTLVINGEK          | NH2-YQGGHNAGHTLVINGEK-COOH     | * |
| YVDYVLGILK                 | NH2-YVDYVLGILK-COOH            | * |
| ELLSIGIQPDILICR            | NH2-ELLSIGIQPDILIC<Cmm*>R-COOH | * |
| GIAAASLAAILEAR             | NH2-GIAAASLAAILEAR-COOH        | * |
| GLDAILVPGGFGYR             | NH2-GLDAILVPGGFGYR-COOH        | * |
| LGAQQCQLVDDSLVR            | NH2-LGAQQC<Cmm*>QLVDDSLVR-C    | * |
| LIDSQDVETR                 | NH2-LIDSQDVETR-COOH            | * |

QLYNAPTIVER  
RGDYLGATVQVIPHITNAIK  
SDLGGTmR  
SDLGGTMR  
VLDVTLNRELAVSSLTR

NH2-QLYNAPTIVER-COOH \*  
NH2-RGDYLGATVQVIPHITNAIK-COOH \*  
NH2-SDLGGTM<Mox>R-COOH \*  
NH2-SDLGGTMR-COOH \*  
NH2-VLDVTLNRELAVSSLTR-COOH \*





|                    |                |                |   |
|--------------------|----------------|----------------|---|
|                    |                | Midlog 2nd Exp | * |
|                    | Midlog 1st Exp | Midlog 2nd Exp | * |
|                    | Midlog 1st Exp |                | * |
|                    |                | Midlog 2nd Exp | * |
|                    |                | Midlog 3rd Exp | * |
|                    |                | Midlog 3rd Exp | * |
|                    |                | Midlog 3rd Exp | * |
|                    | Midlog 1st Exp | Midlog 2nd Exp | * |
|                    |                | Midlog 3rd Exp | * |
|                    |                | Midlog 3rd Exp | * |
|                    |                | Midlog 3rd Exp | * |
|                    |                | Midlog 3rd Exp | * |
|                    |                | Midlog 3rd Exp | * |
|                    |                | Midlog 3rd Exp | * |
|                    | Midlog 1st Exp | Midlog 2nd Exp | * |
|                    |                | Midlog 2nd Exp | * |
|                    |                | Midlog 2nd Exp | * |
|                    |                | Midlog 2nd Exp | * |
|                    |                | Midlog 2nd Exp | * |
|                    |                | Midlog 2nd Exp | * |
|                    |                | Midlog 2nd Exp | * |
|                    |                | Midlog 2nd Exp | * |
|                    |                | Midlog 2nd Exp | * |
|                    |                | Midlog 2nd Exp | * |
|                    |                | Midlog 2nd Exp | * |
|                    |                | Midlog 2nd Exp | * |
|                    |                | Midlog 2nd Exp | * |
| Midlog 2nd control |                |                | * |
|                    | Midlog 1st Exp |                | * |
|                    |                | Midlog 3rd Exp | * |
|                    |                | Midlog 3rd Exp | * |
|                    |                | Midlog 3rd Exp | * |
|                    |                |                | * |
|                    |                |                | * |
| Midlog 2nd control | Midlog 1st Exp |                | * |
|                    |                | Midlog 3rd Exp | * |
|                    |                | Midlog 3rd Exp | * |
|                    |                | Midlog 3rd Exp | * |
|                    |                | Midlog 3rd Exp | * |
|                    | Midlog 1st Exp |                | * |
|                    |                | Midlog 3rd Exp | * |
|                    |                |                | * |
|                    | Midlog 1st Exp |                | * |
|                    |                | Midlog 2nd Exp | * |
|                    | Midlog 1st Exp | Midlog 2nd Exp | * |
|                    |                | Midlog 2nd Exp | * |
|                    |                | Midlog 2nd Exp | * |
|                    |                | Midlog 2nd Exp | * |
|                    |                | Midlog 2nd Exp | * |
|                    |                | Midlog 2nd Exp | * |
|                    |                | Midlog 2nd Exp | * |
|                    | Midlog 1st Exp | Midlog 2nd Exp | * |
|                    |                | Midlog 3rd Exp | * |

Midlog 1st Exp

Midlog 2nd Exp  
Midlog 2nd Exp  
Midlog 2nd Exp  
Midlog 2nd Exp  
Midlog 2nd Exp  
Midlog 2nd Exp  
Midlog 2nd Exp

Midlog 3rd Exp

Midlog 3rd Exp

Midlog 3rd Exp

Midlog 2nd control

Midlog 1st Exp

Midlog 1st Exp

Midlog 1st Exp

Midlog 3rd Exp

Midlog 1st Exp

Midlog 3rd Exp

Midlog 3rd Exp

Midlog 3rd Exp

Midlog 1st Exp

Midlog 3rd Exp

Midlog 2nd Exp  
Midlog 2nd Exp  
Midlog 2nd Exp  
Midlog 2nd Exp  
Midlog 2nd Exp  
Midlog 2nd Exp  
Midlog 2nd Exp  
Midlog 2nd Exp  
Midlog 2nd Exp  
Midlog 2nd Exp  
Midlog 2nd Exp

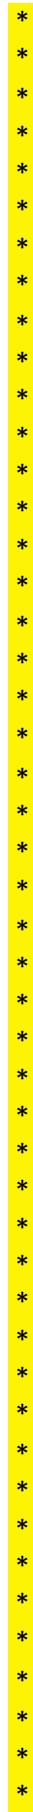

|                    |                |                |                |
|--------------------|----------------|----------------|----------------|
|                    |                | Midlog 2nd Exp |                |
| Midlog 2nd control |                |                |                |
|                    |                |                | Midlog 3rd Exp |
| Midlog 2nd control |                |                | Midlog 3rd Exp |
|                    | Midlog 1st Exp |                |                |
|                    | Midlog 1st Exp | Midlog 2nd Exp |                |
|                    | Midlog 1st Exp |                |                |
| Midlog 2nd control |                |                | Midlog 3rd Exp |
|                    |                | Midlog 2nd Exp | Midlog 3rd Exp |
|                    | Midlog 1st Exp |                |                |
|                    |                |                | Midlog 3rd Exp |
|                    |                | Midlog 2nd Exp | Midlog 3rd Exp |
|                    |                |                | Midlog 3rd Exp |
|                    |                | Midlog 2nd Exp |                |

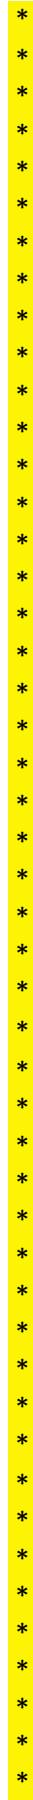

|                |                |                |   |
|----------------|----------------|----------------|---|
|                | Midlog 2nd Exp | Midlog 3rd Exp | * |
|                | Midlog 2nd Exp |                | * |
|                | Midlog 2nd Exp |                | * |
|                | Midlog 2nd Exp |                | * |
|                | Midlog 2nd Exp | Midlog 3rd Exp | * |
|                | Midlog 2nd Exp | Midlog 3rd Exp | * |
|                | Midlog 2nd Exp | Midlog 3rd Exp | * |
|                | Midlog 2nd Exp |                | * |
|                | Midlog 2nd Exp |                | * |
| Midlog 1st Exp | Midlog 2nd Exp |                | * |
| Midlog 1st Exp |                |                | * |
| Midlog 1st Exp | Midlog 2nd Exp | Midlog 3rd Exp | * |
|                | Midlog 2nd Exp | Midlog 3rd Exp | * |
|                | Midlog 2nd Exp |                | * |
|                | Midlog 2nd Exp |                | * |
|                | Midlog 2nd Exp | Midlog 3rd Exp | * |
| Midlog 1st Exp | Midlog 2nd Exp |                | * |
|                | Midlog 2nd Exp |                | * |
|                | Midlog 2nd Exp |                | * |
|                | Midlog 2nd Exp |                | * |
|                | Midlog 2nd Exp |                | * |
|                | Midlog 2nd Exp |                | * |
|                | Midlog 2nd Exp | Midlog 3rd Exp | * |
|                | Midlog 2nd Exp | Midlog 3rd Exp | * |
|                | Midlog 2nd Exp |                | * |
|                | Midlog 2nd Exp |                | * |
|                | Midlog 2nd Exp |                | * |
|                | Midlog 2nd Exp |                | * |
|                | Midlog 2nd Exp | Midlog 3rd Exp | * |
| Midlog 1st Exp |                | Midlog 3rd Exp | * |
|                | Midlog 2nd Exp |                | * |
| Midlog 1st Exp |                |                | * |
| Midlog 1st Exp |                |                | * |
| Midlog 1st Exp |                |                | * |
| Midlog 1st Exp |                |                | * |
| Midlog 1st Exp | Midlog 2nd Exp |                | * |
|                | Midlog 2nd Exp |                | * |
|                | Midlog 2nd Exp |                | * |
|                | Midlog 2nd Exp |                | * |
|                | Midlog 2nd Exp |                | * |
|                | Midlog 2nd Exp |                | * |
| Midlog 1st Exp | Midlog 2nd Exp |                | * |
|                | Midlog 2nd Exp | Midlog 3rd Exp | * |
|                | Midlog 2nd Exp |                | * |
|                |                | Midlog 3rd Exp | * |

|                    |                |                |                |   |
|--------------------|----------------|----------------|----------------|---|
|                    |                | Midlog 2nd Exp | Midlog 3rd Exp | * |
|                    | Midlog 1st Exp |                | Midlog 3rd Exp | * |
|                    |                |                |                | * |
|                    | Midlog 1st Exp |                | Midlog 3rd Exp | * |
|                    |                | Midlog 2nd Exp | Midlog 3rd Exp | * |
| Midlog 2nd control | Midlog 1st Exp | Midlog 2nd Exp | Midlog 3rd Exp | * |
|                    |                | Midlog 2nd Exp | Midlog 3rd Exp | * |
|                    |                | Midlog 2nd Exp | Midlog 3rd Exp | * |
|                    |                | Midlog 2nd Exp | Midlog 3rd Exp | * |
|                    |                | Midlog 2nd Exp | Midlog 3rd Exp | * |
|                    |                | Midlog 2nd Exp | Midlog 3rd Exp | * |
|                    |                | Midlog 2nd Exp | Midlog 3rd Exp | * |
|                    |                | Midlog 2nd Exp | Midlog 3rd Exp | * |
|                    | Midlog 1st Exp |                | Midlog 3rd Exp | * |
|                    | Midlog 1st Exp |                | Midlog 3rd Exp | * |
|                    |                |                |                | * |
|                    | Midlog 1st Exp |                | Midlog 3rd Exp | * |
| Midlog 2nd control |                |                | Midlog 3rd Exp | * |
|                    | Midlog 1st Exp |                | Midlog 3rd Exp | * |
|                    |                |                |                | * |
| Midlog 2nd control | Midlog 1st Exp |                | Midlog 3rd Exp | * |
|                    |                |                | Midlog 3rd Exp | * |
|                    |                |                |                | * |
|                    |                |                |                | * |
|                    | Midlog 1st Exp |                | Midlog 3rd Exp | * |
|                    |                |                | Midlog 3rd Exp | * |
|                    |                |                |                | * |
|                    | Midlog 1st Exp |                |                | * |
|                    | Midlog 1st Exp | Midlog 2nd Exp |                | * |
|                    |                | Midlog 2nd Exp |                | * |
|                    |                | Midlog 2nd Exp | Midlog 3rd Exp | * |
|                    |                |                |                | * |
|                    | Midlog 1st Exp | Midlog 2nd Exp | Midlog 3rd Exp | * |
|                    |                | Midlog 2nd Exp |                | * |
|                    |                | Midlog 2nd Exp |                | * |
|                    |                | Midlog 2nd Exp |                | * |
|                    | Midlog 1st Exp | Midlog 2nd Exp |                | * |
|                    |                |                | Midlog 3rd Exp | * |
|                    |                | Midlog 2nd Exp |                | * |
|                    |                | Midlog 2nd Exp |                | * |
|                    |                | Midlog 2nd Exp |                | * |
|                    |                | Midlog 2nd Exp |                | * |

|                    |                |                |   |
|--------------------|----------------|----------------|---|
|                    |                | Midlog 2nd Exp | * |
|                    |                | Midlog 2nd Exp | * |
| Midlog 2nd control |                | Midlog 2nd Exp | * |
| Midlog 2nd control | Midlog 1st Exp |                | * |
| Midlog 2nd control |                | Midlog 2nd Exp | * |
| Midlog 2nd control |                |                | * |
| Midlog 2nd control |                |                | * |
| Midlog 2nd control |                |                | * |
| Midlog 2nd control |                |                | * |
| Midlog 2nd control |                |                | * |
| Midlog 2nd control |                |                | * |
| Midlog 2nd control |                |                | * |
| Midlog 2nd control |                |                | * |
| Midlog 2nd control |                |                | * |
| Midlog 2nd control |                |                | * |
| Midlog 2nd control |                |                | * |
| Midlog 2nd control | Midlog 1st Exp |                | * |
| Midlog 2nd control |                |                | * |
| Midlog 2nd control |                | Midlog 3rd Exp | * |
| Midlog 2nd control | Midlog 1st Exp |                | * |
| Midlog 2nd control |                |                | * |
| Midlog 2nd control | Midlog 1st Exp |                | * |
| Midlog 2nd control | Midlog 1st Exp |                | * |
| Midlog 2nd control | Midlog 1st Exp |                | * |
| Midlog 2nd control |                |                | * |
| Midlog 2nd control |                |                | * |
| Midlog 2nd control |                |                | * |
| Midlog 2nd control |                |                | * |
| Midlog 2nd control |                | Midlog 2nd Exp | * |
| Midlog 2nd control |                |                | * |
| Midlog 2nd control |                |                | * |
| Midlog 2nd control |                |                | * |
| Midlog 2nd control |                |                | * |
| Midlog 2nd control | Midlog 1st Exp |                | * |
| Midlog 2nd control | Midlog 1st Exp | Midlog 2nd Exp | * |
| Midlog 2nd control |                |                | * |
| Midlog 2nd control |                |                | * |
| Midlog 2nd control |                |                | * |
| Midlog 2nd control |                |                | * |
| Midlog 2nd control |                |                | * |
| Midlog 2nd control | Midlog 1st Exp |                | * |
| Midlog 2nd control |                |                | * |









|                |                |                |   |
|----------------|----------------|----------------|---|
|                |                | Midlog 2nd Exp | * |
|                |                | Midlog 2nd Exp | * |
|                |                | Midlog 2nd Exp | * |
|                |                | Midlog 2nd Exp | * |
| Midlog 1st Exp | Midlog 2nd Exp | Midlog 3rd Exp | * |
| Midlog 1st Exp | Midlog 2nd Exp |                | * |
|                | Midlog 2nd Exp |                | * |
| Midlog 1st Exp | Midlog 2nd Exp | Midlog 3rd Exp | * |
|                | Midlog 2nd Exp |                | * |
| Midlog 1st Exp | Midlog 2nd Exp | Midlog 3rd Exp | * |
| Midlog 1st Exp |                |                | * |
|                | Midlog 2nd Exp |                | * |
|                | Midlog 2nd Exp |                | * |
|                | Midlog 2nd Exp |                | * |
|                | Midlog 2nd Exp |                | * |
| Midlog 1st Exp | Midlog 2nd Exp | Midlog 3rd Exp | * |
| Midlog 1st Exp | Midlog 2nd Exp | Midlog 3rd Exp | * |
|                | Midlog 2nd Exp |                | * |
|                | Midlog 2nd Exp |                | * |
| Midlog 1st Exp | Midlog 2nd Exp |                | * |
| Midlog 1st Exp | Midlog 2nd Exp |                | * |
|                | Midlog 2nd Exp |                | * |
|                | Midlog 2nd Exp |                | * |
|                | Midlog 2nd Exp |                | * |
| Midlog 1st Exp | Midlog 2nd Exp |                | * |
| Midlog 1st Exp | Midlog 2nd Exp | Midlog 3rd Exp | * |
| Midlog 1st Exp | Midlog 2nd Exp | Midlog 3rd Exp | * |
|                | Midlog 2nd Exp | Midlog 3rd Exp | * |
| Midlog 1st Exp | Midlog 2nd Exp | Midlog 3rd Exp | * |
|                | Midlog 2nd Exp |                | * |
|                | Midlog 2nd Exp |                | * |
|                | Midlog 2nd Exp |                | * |
| Midlog 1st Exp | Midlog 2nd Exp |                | * |
| Midlog 1st Exp | Midlog 2nd Exp |                | * |
| Midlog 1st Exp | Midlog 2nd Exp | Midlog 3rd Exp | * |
| Midlog 1st Exp | Midlog 2nd Exp |                | * |
|                | Midlog 2nd Exp |                | * |
|                | Midlog 2nd Exp |                | * |
|                | Midlog 2nd Exp |                | * |
| Midlog 1st Exp | Midlog 2nd Exp |                | * |
|                | Midlog 2nd Exp |                | * |
|                |                | Midlog 3rd Exp | * |
| Midlog 1st Exp | Midlog 2nd Exp | Midlog 3rd Exp | * |
| Midlog 1st Exp | Midlog 2nd Exp | Midlog 3rd Exp | * |

|                    |                |                |                |   |
|--------------------|----------------|----------------|----------------|---|
|                    |                | Midlog 2nd Exp |                | * |
|                    | Midlog 1st Exp | Midlog 2nd Exp | Midlog 3rd Exp | * |
|                    | Midlog 1st Exp | Midlog 2nd Exp | Midlog 3rd Exp | * |
|                    |                | Midlog 2nd Exp |                | * |
|                    | Midlog 1st Exp | Midlog 2nd Exp | Midlog 3rd Exp | * |
|                    | Midlog 1st Exp | Midlog 2nd Exp | Midlog 3rd Exp | * |
|                    | Midlog 1st Exp | Midlog 2nd Exp | Midlog 3rd Exp | * |
|                    | Midlog 1st Exp | Midlog 2nd Exp | Midlog 3rd Exp | * |
|                    |                |                | Midlog 3rd Exp | * |
|                    | Midlog 1st Exp |                |                | * |
|                    |                | Midlog 2nd Exp |                | * |
| Midlog 2nd control | Midlog 1st Exp | Midlog 2nd Exp | Midlog 3rd Exp | * |
|                    | Midlog 1st Exp | Midlog 2nd Exp |                | * |
|                    | Midlog 1st Exp | Midlog 2nd Exp | Midlog 3rd Exp | * |
|                    |                | Midlog 2nd Exp |                | * |
|                    | Midlog 1st Exp |                |                | * |
|                    |                | Midlog 2nd Exp |                | * |
|                    |                | Midlog 2nd Exp |                | * |
|                    |                | Midlog 2nd Exp |                | * |
|                    |                | Midlog 2nd Exp | Midlog 3rd Exp | * |
|                    | Midlog 1st Exp |                | Midlog 3rd Exp | * |
|                    |                | Midlog 2nd Exp |                | * |
|                    | Midlog 1st Exp |                | Midlog 3rd Exp | * |
|                    |                | Midlog 2nd Exp |                | * |
|                    | Midlog 1st Exp | Midlog 2nd Exp |                | * |
|                    | Midlog 1st Exp | Midlog 2nd Exp |                | * |
|                    |                | Midlog 2nd Exp |                | * |
|                    | Midlog 1st Exp | Midlog 2nd Exp | Midlog 3rd Exp | * |
|                    | Midlog 1st Exp | Midlog 2nd Exp |                | * |
|                    | Midlog 1st Exp | Midlog 2nd Exp |                | * |
| Midlog 2nd control | Midlog 1st Exp | Midlog 2nd Exp | Midlog 3rd Exp | * |
| Midlog 2nd control | Midlog 1st Exp | Midlog 2nd Exp | Midlog 3rd Exp | * |
| Midlog 2nd control | Midlog 1st Exp | Midlog 2nd Exp | Midlog 3rd Exp | * |
|                    | Midlog 1st Exp | Midlog 2nd Exp | Midlog 3rd Exp | * |
|                    |                | Midlog 2nd Exp |                | * |
|                    |                | Midlog 2nd Exp |                | * |
|                    |                | Midlog 2nd Exp |                | * |
|                    |                | Midlog 2nd Exp |                | * |
|                    |                |                | Midlog 3rd Exp | * |
| Midlog 2nd control |                | Midlog 2nd Exp |                | * |
| Midlog 2nd control | Midlog 1st Exp | Midlog 2nd Exp | Midlog 3rd Exp | * |

|                    |                |                |                |   |
|--------------------|----------------|----------------|----------------|---|
| Midlog 2nd control | Midlog 1st Exp | Midlog 2nd Exp | Midlog 3rd Exp | * |
|                    |                | Midlog 2nd Exp | Midlog 3rd Exp | * |
|                    | Midlog 1st Exp | Midlog 2nd Exp |                | * |
|                    | Midlog 1st Exp | Midlog 2nd Exp | Midlog 3rd Exp | * |
|                    |                | Midlog 2nd Exp |                | * |
|                    |                | Midlog 2nd Exp |                | * |
|                    | Midlog 1st Exp | Midlog 2nd Exp | Midlog 3rd Exp | * |
| Midlog 2nd control | Midlog 1st Exp | Midlog 2nd Exp | Midlog 3rd Exp | * |
| Midlog 2nd control | Midlog 1st Exp | Midlog 2nd Exp | Midlog 3rd Exp | * |
|                    |                | Midlog 2nd Exp |                | * |
|                    | Midlog 1st Exp | Midlog 2nd Exp |                | * |
|                    | Midlog 1st Exp | Midlog 2nd Exp |                | * |
|                    | Midlog 1st Exp | Midlog 2nd Exp |                | * |
|                    | Midlog 1st Exp | Midlog 2nd Exp |                | * |
|                    | Midlog 1st Exp | Midlog 2nd Exp |                | * |
|                    |                | Midlog 2nd Exp |                | * |
|                    | Midlog 1st Exp | Midlog 2nd Exp |                | * |
|                    | Midlog 1st Exp | Midlog 2nd Exp |                | * |
|                    | Midlog 1st Exp | Midlog 2nd Exp |                | * |
|                    | Midlog 1st Exp | Midlog 2nd Exp |                | * |
|                    | Midlog 1st Exp | Midlog 2nd Exp | Midlog 3rd Exp | * |
|                    | Midlog 1st Exp | Midlog 2nd Exp |                | * |
| Midlog 2nd control | Midlog 1st Exp | Midlog 2nd Exp | Midlog 3rd Exp | * |
|                    |                | Midlog 2nd Exp |                | * |
|                    | Midlog 1st Exp | Midlog 2nd Exp |                | * |
|                    |                | Midlog 2nd Exp |                | * |
|                    |                | Midlog 2nd Exp |                | * |
|                    | Midlog 1st Exp | Midlog 2nd Exp |                | * |
|                    | Midlog 1st Exp | Midlog 2nd Exp |                | * |
|                    |                | Midlog 2nd Exp |                | * |
|                    | Midlog 1st Exp | Midlog 2nd Exp |                | * |
| Midlog 2nd control | Midlog 1st Exp | Midlog 2nd Exp | Midlog 3rd Exp | * |
| Midlog 2nd control | Midlog 1st Exp | Midlog 2nd Exp | Midlog 3rd Exp | * |
|                    |                | Midlog 2nd Exp |                | * |
|                    |                | Midlog 2nd Exp |                | * |
| Midlog 2nd control | Midlog 1st Exp | Midlog 2nd Exp | Midlog 3rd Exp | * |
|                    | Midlog 1st Exp | Midlog 2nd Exp | Midlog 3rd Exp | * |
| Midlog 2nd control |                |                |                | * |
| Midlog 2nd control |                |                |                | * |
|                    |                | Midlog 2nd Exp |                | * |
|                    |                | Midlog 2nd Exp |                | * |
|                    |                | Midlog 2nd Exp |                | * |
|                    |                | Midlog 2nd Exp | Midlog 3rd Exp | * |
|                    |                | Midlog 2nd Exp |                | * |

|                    |                |                |   |
|--------------------|----------------|----------------|---|
|                    | Midlog 2nd Exp |                | * |
| Midlog 1st Exp     | Midlog 2nd Exp |                | * |
|                    | Midlog 2nd Exp |                | * |
|                    | Midlog 2nd Exp |                | * |
|                    | Midlog 2nd Exp |                | * |
|                    | Midlog 2nd Exp |                | * |
|                    | Midlog 2nd Exp |                | * |
|                    | Midlog 2nd Exp |                | * |
| Midlog 1st Exp     | Midlog 2nd Exp | Midlog 3rd Exp | * |
| Midlog 1st Exp     | Midlog 2nd Exp | Midlog 3rd Exp | * |
| Midlog 1st Exp     | Midlog 2nd Exp |                | * |
|                    | Midlog 2nd Exp | Midlog 3rd Exp | * |
|                    | Midlog 2nd Exp |                | * |
|                    | Midlog 2nd Exp | Midlog 3rd Exp | * |
|                    | Midlog 2nd Exp |                | * |
|                    | Midlog 2nd Exp |                | * |
|                    | Midlog 2nd Exp |                | * |
|                    | Midlog 2nd Exp |                | * |
|                    | Midlog 2nd Exp |                | * |
| Midlog 1st Exp     | Midlog 2nd Exp | Midlog 3rd Exp | * |
|                    | Midlog 2nd Exp |                | * |
|                    | Midlog 2nd Exp |                | * |
|                    | Midlog 2nd Exp |                | * |
| Midlog 1st Exp     | Midlog 2nd Exp | Midlog 3rd Exp | * |
| Midlog 1st Exp     | Midlog 2nd Exp |                | * |
|                    | Midlog 2nd Exp |                | * |
|                    | Midlog 2nd Exp |                | * |
|                    | Midlog 2nd Exp |                | * |
|                    | Midlog 2nd Exp |                | * |
| Midlog 1st Exp     | Midlog 2nd Exp | Midlog 3rd Exp | * |
| Midlog 1st Exp     |                |                | * |
| Midlog 1st Exp     |                |                | * |
| Midlog 1st Exp     |                |                | * |
| Midlog 1st Exp     |                |                | * |
| Midlog 1st Exp     |                |                | * |
|                    |                | Midlog 3rd Exp | * |
| Midlog 1st Exp     |                |                | * |
| Midlog 1st Exp     |                |                | * |
| Midlog 1st Exp     |                |                | * |
|                    | Midlog 2nd Exp |                | * |
| Midlog 2nd control | Midlog 2nd Exp |                | * |
|                    |                | Midlog 3rd Exp | * |
| Midlog 1st Exp     |                |                | * |
| Midlog 1st Exp     |                | Midlog 3rd Exp | * |
| Midlog 2nd control |                |                | * |
|                    |                | Midlog 3rd Exp | * |

|                    |                |                |                |   |
|--------------------|----------------|----------------|----------------|---|
|                    | Midlog 1st Exp |                | Midlog 3rd Exp | * |
|                    |                |                | Midlog 3rd Exp | * |
|                    |                |                | Midlog 3rd Exp | * |
|                    | Midlog 1st Exp |                | Midlog 3rd Exp | * |
|                    |                | Midlog 2nd Exp |                | * |
|                    |                |                | Midlog 3rd Exp | * |
|                    |                |                | Midlog 3rd Exp | * |
|                    | Midlog 1st Exp |                |                | * |
|                    | Midlog 1st Exp |                |                | * |
|                    | Midlog 1st Exp | Midlog 2nd Exp | Midlog 3rd Exp | * |
|                    | Midlog 1st Exp | Midlog 2nd Exp |                | * |
|                    | Midlog 1st Exp | Midlog 2nd Exp |                | * |
|                    | Midlog 1st Exp |                |                | * |
|                    | Midlog 1st Exp |                |                | * |
|                    | Midlog 1st Exp | Midlog 2nd Exp |                | * |
|                    | Midlog 1st Exp | Midlog 2nd Exp |                | * |
|                    |                | Midlog 2nd Exp |                | * |
|                    |                | Midlog 2nd Exp |                | * |
|                    |                | Midlog 2nd Exp |                | * |
|                    |                | Midlog 2nd Exp |                | * |
|                    | Midlog 1st Exp | Midlog 2nd Exp |                | * |
|                    |                | Midlog 2nd Exp | Midlog 3rd Exp | * |
|                    |                | Midlog 2nd Exp |                | * |
|                    |                | Midlog 2nd Exp | Midlog 3rd Exp | * |
|                    |                | Midlog 2nd Exp | Midlog 3rd Exp | * |
|                    |                | Midlog 2nd Exp | Midlog 3rd Exp | * |
|                    | Midlog 1st Exp | Midlog 2nd Exp | Midlog 3rd Exp | * |
|                    |                | Midlog 2nd Exp | Midlog 3rd Exp | * |
|                    |                | Midlog 2nd Exp | Midlog 3rd Exp | * |
|                    | Midlog 1st Exp | Midlog 2nd Exp |                | * |
|                    | Midlog 1st Exp | Midlog 2nd Exp |                | * |
|                    |                | Midlog 2nd Exp |                | * |
|                    |                |                | Midlog 3rd Exp | * |
|                    | Midlog 1st Exp |                | Midlog 3rd Exp | * |
|                    | Midlog 1st Exp |                |                | * |
|                    |                |                | Midlog 3rd Exp | * |
|                    |                |                | Midlog 3rd Exp | * |
|                    |                |                | Midlog 3rd Exp | * |
|                    | Midlog 1st Exp |                | Midlog 3rd Exp | * |
|                    | Midlog 1st Exp |                | Midlog 3rd Exp | * |
|                    | Midlog 1st Exp |                | Midlog 3rd Exp | * |
|                    | Midlog 1st Exp | Midlog 2nd Exp | Midlog 3rd Exp | * |
| Midlog 2nd control | Midlog 1st Exp | Midlog 2nd Exp | Midlog 3rd Exp | * |
|                    | Midlog 1st Exp | Midlog 2nd Exp |                | * |
|                    | Midlog 1st Exp |                | Midlog 3rd Exp | * |
| Midlog 2nd control |                |                | Midlog 3rd Exp | * |
| Midlog 2nd control |                |                | Midlog 3rd Exp | * |

|                    |                |                |                |   |
|--------------------|----------------|----------------|----------------|---|
| Midlog 1st Exp     |                |                |                | * |
| Midlog 1st Exp     |                |                | Midlog 3rd Exp | * |
| Midlog 1st Exp     |                |                |                | * |
|                    |                | Midlog 2nd Exp |                | * |
|                    |                | Midlog 2nd Exp |                | * |
|                    |                | Midlog 2nd Exp |                | * |
|                    |                |                |                | * |
|                    |                | Midlog 2nd Exp |                | * |
|                    |                | Midlog 2nd Exp |                | * |
|                    |                | Midlog 2nd Exp |                | * |
|                    |                | Midlog 2nd Exp |                | * |
| Midlog 1st Exp     |                | Midlog 2nd Exp |                | * |
| Midlog 1st Exp     |                | Midlog 2nd Exp |                | * |
|                    |                | Midlog 2nd Exp |                | * |
|                    |                | Midlog 2nd Exp |                | * |
|                    |                | Midlog 2nd Exp |                | * |
|                    |                | Midlog 2nd Exp |                | * |
|                    |                | Midlog 2nd Exp |                | * |
|                    |                | Midlog 2nd Exp |                | * |
|                    |                | Midlog 2nd Exp |                | * |
|                    |                | Midlog 2nd Exp |                | * |
|                    |                | Midlog 2nd Exp |                | * |
|                    |                | Midlog 2nd Exp |                | * |
|                    |                | Midlog 2nd Exp |                | * |
|                    |                | Midlog 2nd Exp |                | * |
|                    |                | Midlog 2nd Exp |                | * |
|                    |                | Midlog 2nd Exp |                | * |
|                    |                | Midlog 2nd Exp |                | * |
|                    |                | Midlog 2nd Exp |                | * |
|                    |                | Midlog 2nd Exp |                | * |
|                    |                | Midlog 2nd Exp |                | * |
|                    |                | Midlog 2nd Exp |                | * |
|                    |                | Midlog 2nd Exp | Midlog 3rd Exp | * |
|                    |                |                | Midlog 3rd Exp | * |
|                    |                |                | Midlog 3rd Exp | * |
|                    |                |                | Midlog 3rd Exp | * |
| Midlog 1st Exp     |                | Midlog 2nd Exp |                | * |
|                    |                |                |                | * |
|                    |                | Midlog 2nd Exp |                | * |
|                    |                | Midlog 2nd Exp |                | * |
| Midlog 2nd control | Midlog 1st Exp | Midlog 2nd Exp | Midlog 3rd Exp | * |
|                    |                | Midlog 2nd Exp |                | * |
|                    | Midlog 1st Exp |                | Midlog 3rd Exp | * |
|                    | Midlog 1st Exp |                |                | * |
|                    | Midlog 1st Exp |                | Midlog 3rd Exp | * |
| Midlog 2nd control |                | Midlog 2nd Exp | Midlog 3rd Exp | * |
|                    | Midlog 1st Exp | Midlog 2nd Exp | Midlog 3rd Exp | * |
|                    | Midlog 1st Exp |                |                | * |
|                    | Midlog 1st Exp | Midlog 2nd Exp | Midlog 3rd Exp | * |
|                    | Midlog 1st Exp |                | Midlog 3rd Exp | * |
|                    |                |                | Midlog 3rd Exp | * |
|                    |                |                | Midlog 3rd Exp | * |
|                    |                |                | Midlog 3rd Exp | * |
|                    |                |                | Midlog 3rd Exp | * |
|                    |                |                | Midlog 3rd Exp | * |
|                    |                |                | Midlog 3rd Exp | * |
|                    |                |                | Midlog 3rd Exp | * |
|                    |                |                | Midlog 3rd Exp | * |
| Midlog 1st Exp     |                |                |                | * |
| Midlog 1st Exp     |                |                |                | * |
|                    |                | Midlog 2nd Exp |                | * |







|                    |                |                |
|--------------------|----------------|----------------|
|                    | Midlog 2nd Exp |                |
| Midlog 2nd control | Midlog 2nd Exp |                |
|                    | Midlog 2nd Exp |                |
| Midlog 1st Exp     | Midlog 2nd Exp |                |
| Midlog 1st Exp     |                |                |
|                    | Midlog 2nd Exp |                |
|                    | Midlog 2nd Exp |                |
| Midlog 1st Exp     | Midlog 2nd Exp | Midlog 3rd Exp |
| Midlog 1st Exp     |                |                |
| Midlog 1st Exp     | Midlog 2nd Exp | Midlog 3rd Exp |
|                    | Midlog 2nd Exp |                |
|                    | Midlog 2nd Exp |                |
| Midlog 1st Exp     | Midlog 2nd Exp |                |
| Midlog 1st Exp     | Midlog 2nd Exp |                |
| Midlog 1st Exp     | Midlog 2nd Exp |                |
| Midlog 1st Exp     | Midlog 2nd Exp |                |
| Midlog 1st Exp     | Midlog 2nd Exp |                |
| Midlog 1st Exp     |                |                |
|                    | Midlog 2nd Exp |                |
|                    | Midlog 2nd Exp |                |
| Midlog 1st Exp     | Midlog 2nd Exp |                |
| Midlog 1st Exp     |                |                |
|                    |                | Midlog 3rd Exp |
|                    |                | Midlog 3rd Exp |

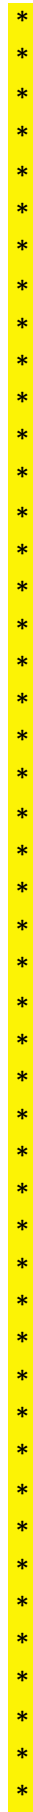

|                |                |                |
|----------------|----------------|----------------|
| Midlog 1st Exp |                |                |
| Midlog 1st Exp |                |                |
| Midlog 1st Exp |                |                |
| Midlog 1st Exp | Midlog 2nd Exp |                |
| Midlog 1st Exp | Midlog 2nd Exp |                |
| Midlog 1st Exp |                |                |
| Midlog 1st Exp |                |                |
| Midlog 1st Exp | Midlog 2nd Exp |                |
| Midlog 1st Exp |                |                |
| Midlog 1st Exp |                |                |
| Midlog 1st Exp | Midlog 2nd Exp |                |
| Midlog 1st Exp | Midlog 2nd Exp |                |
| Midlog 1st Exp |                |                |
| Midlog 1st Exp |                |                |
| Midlog 1st Exp |                |                |
|                | Midlog 2nd Exp |                |
| Midlog 1st Exp | Midlog 2nd Exp | Midlog 3rd Exp |
|                | Midlog 2nd Exp |                |
| Midlog 1st Exp | Midlog 2nd Exp |                |
|                | Midlog 2nd Exp |                |
|                | Midlog 2nd Exp |                |
| Midlog 1st Exp | Midlog 2nd Exp |                |
|                | Midlog 2nd Exp |                |
| Midlog 1st Exp | Midlog 2nd Exp | Midlog 3rd Exp |
|                | Midlog 2nd Exp | Midlog 3rd Exp |
|                | Midlog 2nd Exp |                |
|                | Midlog 2nd Exp |                |
| Midlog 1st Exp | Midlog 2nd Exp |                |
|                | Midlog 2nd Exp |                |
|                | Midlog 2nd Exp |                |
|                | Midlog 2nd Exp |                |
| Midlog 1st Exp | Midlog 2nd Exp |                |
|                |                | Midlog 3rd Exp |
| Midlog 1st Exp |                |                |
| Midlog 1st Exp |                |                |
| Midlog 1st Exp |                | Midlog 3rd Exp |

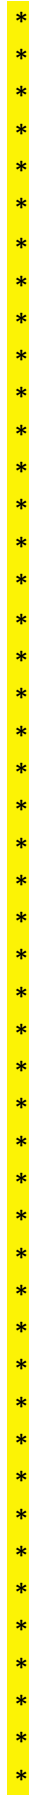







Midlog 2nd control  
Midlog 2nd control  
Midlog 2nd control

Midlog 2nd control  
Midlog 2nd control

Midlog 2nd Exp  
Midlog 2nd Exp

Midlog 1st Exp

Midlog 2nd Exp  
Midlog 2nd Exp  
Midlog 2nd Exp  
Midlog 2nd Exp

Midlog 2nd Exp  
Midlog 2nd Exp

Midlog 3rd Exp  
Midlog 3rd Exp

Midlog 1st Exp

Midlog 1st Exp

Midlog 2nd Exp  
Midlog 2nd Exp  
Midlog 2nd Exp  
Midlog 2nd Exp

Midlog 3rd Exp

Midlog 1st Exp

Midlog 2nd Exp  
Midlog 2nd Exp  
Midlog 2nd Exp  
Midlog 2nd Exp  
Midlog 2nd Exp

Midlog 3rd Exp  
Midlog 3rd Exp  
Midlog 3rd Exp

Midlog 1st Exp

Midlog 2nd Exp

Midlog 3rd Exp

Midlog 1st Exp

Midlog 2nd Exp

Midlog 3rd Exp

Midlog 1st Exp

Midlog 1st Exp

Midlog 2nd Exp  
Midlog 2nd Exp

Midlog 3rd Exp  
Midlog 3rd Exp

Midlog 1st Exp

Midlog 1st Exp

Midlog 1st Exp

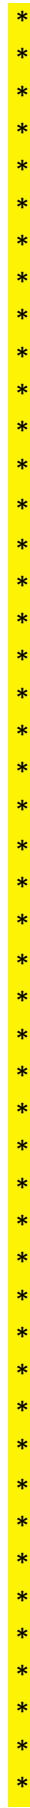









|                    |                |                |                |   |
|--------------------|----------------|----------------|----------------|---|
|                    |                | Midlog 2nd Exp |                | * |
| Midlog 2nd control |                |                |                | * |
|                    |                | Midlog 2nd Exp |                | * |
|                    | Midlog 1st Exp | Midlog 2nd Exp |                | * |
|                    |                | Midlog 2nd Exp |                | * |
|                    |                | Midlog 2nd Exp |                | * |
|                    |                | Midlog 2nd Exp |                | * |
|                    |                | Midlog 2nd Exp |                | * |
|                    |                | Midlog 2nd Exp |                | * |
|                    |                | Midlog 2nd Exp |                | * |
|                    |                | Midlog 2nd Exp |                | * |
|                    |                | Midlog 2nd Exp |                | * |
|                    |                | Midlog 2nd Exp |                | * |
|                    | Midlog 1st Exp | Midlog 2nd Exp |                | * |
|                    | Midlog 1st Exp | Midlog 2nd Exp |                | * |
|                    | Midlog 1st Exp | Midlog 2nd Exp | Midlog 3rd Exp | * |
|                    |                |                |                | * |
|                    | Midlog 1st Exp | Midlog 2nd Exp | Midlog 3rd Exp | * |
|                    |                |                | Midlog 3rd Exp | * |
|                    |                |                | Midlog 3rd Exp | * |
|                    | Midlog 1st Exp | Midlog 2nd Exp | Midlog 3rd Exp | * |
| Midlog 2nd control |                |                |                | * |
|                    | Midlog 1st Exp |                |                | * |
|                    | Midlog 1st Exp |                |                | * |
|                    | Midlog 1st Exp |                |                | * |
|                    | Midlog 1st Exp |                |                | * |
|                    | Midlog 1st Exp |                |                | * |
|                    | Midlog 1st Exp |                |                | * |
|                    | Midlog 1st Exp |                |                | * |
|                    | Midlog 1st Exp |                |                | * |
|                    | Midlog 1st Exp | Midlog 2nd Exp |                | * |
|                    |                |                | Midlog 3rd Exp | * |
|                    | Midlog 1st Exp |                | Midlog 3rd Exp | * |
|                    |                | Midlog 2nd Exp |                | * |
|                    |                | Midlog 2nd Exp |                | * |
| Midlog 2nd control |                |                |                | * |
| Midlog 2nd control |                |                |                | * |
| Midlog 2nd control |                |                |                | * |
| Midlog 2nd control |                |                |                | * |
| Midlog 2nd control |                |                |                | * |
| Midlog 2nd control |                |                |                | * |
| Midlog 2nd control |                |                |                | * |
| Midlog 2nd control |                |                |                | * |
| Midlog 2nd control | Midlog 1st Exp | Midlog 2nd Exp | Midlog 3rd Exp | * |
| Midlog 2nd control |                |                |                | * |
| Midlog 2nd control |                |                |                | * |
| Midlog 2nd control | Midlog 1st Exp |                |                | * |

|                    |                |                |   |
|--------------------|----------------|----------------|---|
| Midlog 2nd control |                |                | * |
| Midlog 2nd control |                |                | * |
| Midlog 2nd control |                |                | * |
| Midlog 2nd control |                |                | * |
| Midlog 2nd control |                |                | * |
| Midlog 2nd control |                |                | * |
| Midlog 2nd control |                | Midlog 3rd Exp | * |
| Midlog 2nd control |                | Midlog 3rd Exp | * |
| Midlog 2nd control |                | Midlog 3rd Exp | * |
| Midlog 2nd control |                |                | * |
| Midlog 2nd control |                |                | * |
| Midlog 2nd control |                |                | * |
| Midlog 2nd control | Midlog 1st Exp | Midlog 3rd Exp | * |
| Midlog 2nd control |                |                | * |
| Midlog 2nd control |                |                | * |
| Midlog 2nd control |                |                | * |
| Midlog 2nd control | Midlog 1st Exp |                | * |
| Midlog 2nd control |                |                | * |
|                    |                | Midlog 2nd Exp | * |
| Midlog 2nd control | Midlog 1st Exp |                | * |
| Midlog 2nd control |                |                | * |
| Midlog 2nd control | Midlog 1st Exp |                | * |
| Midlog 2nd control |                |                | * |
| Midlog 2nd control |                | Midlog 3rd Exp | * |
| Midlog 2nd control |                | Midlog 2nd Exp | * |
| Midlog 2nd control |                |                | * |
| Midlog 2nd control |                |                | * |
| Midlog 2nd control | Midlog 1st Exp | Midlog 3rd Exp | * |
| Midlog 2nd control |                | Midlog 3rd Exp | * |
| Midlog 2nd control |                |                | * |
| Midlog 2nd control |                |                | * |
| Midlog 2nd control |                |                | * |
| Midlog 2nd control |                |                | * |
| Midlog 2nd control |                | Midlog 2nd Exp | * |
| Midlog 2nd control |                |                | * |
| Midlog 2nd control |                | Midlog 3rd Exp | * |
| Midlog 2nd control |                |                | * |
| Midlog 2nd control | Midlog 1st Exp |                | * |
| Midlog 2nd control |                |                | * |
| Midlog 2nd control |                |                | * |
| Midlog 2nd control |                | Midlog 3rd Exp | * |
| Midlog 2nd control |                |                | * |

Midlog 2nd control  
Midlog 2nd control Midlog 1st Exp Midlog 2nd Exp  
Midlog 2nd control  
Midlog 2nd control  
Midlog 2nd control  
Midlog 2nd control  
Midlog 2nd control Midlog 3rd Exp  
Midlog 2nd control  
Midlog 2nd control Midlog 3rd Exp  
Midlog 2nd control  
Midlog 2nd control  
Midlog 2nd control  
Midlog 2nd control  
Midlog 2nd control Midlog 1st Exp  
Midlog 2nd control  
Midlog 2nd control  
Midlog 2nd control  
Midlog 2nd control  
Midlog 2nd control Midlog 1st Exp Midlog 2nd Exp  
Midlog 2nd control  
Midlog 2nd control Midlog 2nd Exp  
Midlog 2nd control  
Midlog 2nd control  
Midlog 2nd control  
Midlog 2nd control  
Midlog 2nd control Midlog 1st Exp  
Midlog 2nd control Midlog 1st Exp  
Midlog 2nd control  
Midlog 2nd control

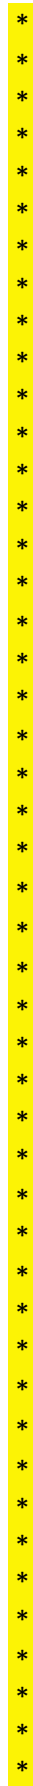



Midlog 2nd control  
Midlog 2nd control

Midlog 1st Exp  
Midlog 1st Exp  
Midlog 1st Exp  
Midlog 1st Exp

Midlog 2nd Exp  
Midlog 2nd Exp  
Midlog 2nd Exp  
Midlog 2nd Exp  
Midlog 2nd Exp

Midlog 1st Exp  
Midlog 1st Exp  
Midlog 1st Exp  
Midlog 1st Exp

Midlog 2nd Exp  
Midlog 2nd Exp  
Midlog 2nd Exp  
Midlog 2nd Exp  
Midlog 2nd Exp

Midlog 3rd Exp  
Midlog 3rd Exp  
Midlog 3rd Exp  
Midlog 3rd Exp  
Midlog 3rd Exp

Midlog 1st Exp  
Midlog 1st Exp  
Midlog 1st Exp  
Midlog 1st Exp  
Midlog 1st Exp

Midlog 2nd control  
Midlog 2nd control

Midlog 1st Exp  
Midlog 1st Exp

Midlog 2nd Exp  
Midlog 2nd Exp  
Midlog 2nd Exp  
Midlog 2nd Exp

Midlog 3rd Exp  
Midlog 3rd Exp

Midlog 1st Exp  
Midlog 1st Exp  
Midlog 1st Exp  
Midlog 1st Exp

Midlog 2nd Exp  
Midlog 2nd Exp

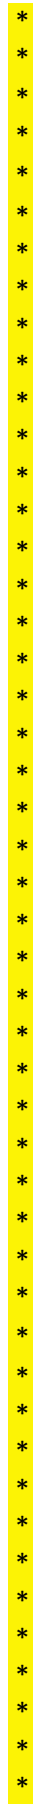







|                    |                |                |                |   |
|--------------------|----------------|----------------|----------------|---|
| Midlog 2nd control | Midlog 1st Exp | Midlog 2nd Exp | Midlog 3rd Exp | * |
| Midlog 2nd control | Midlog 1st Exp | Midlog 2nd Exp |                | * |
| Midlog 2nd control |                | Midlog 2nd Exp | Midlog 3rd Exp | * |
|                    |                | Midlog 2nd Exp | Midlog 3rd Exp | * |
| Midlog 2nd control |                | Midlog 2nd Exp | Midlog 3rd Exp | * |
|                    |                | Midlog 2nd Exp | Midlog 3rd Exp | * |
| Midlog 2nd control |                | Midlog 2nd Exp |                | * |
| Midlog 2nd control |                |                |                | * |
| Midlog 2nd control |                | Midlog 2nd Exp |                | * |
| Midlog 2nd control |                |                |                | * |
| Midlog 2nd control |                | Midlog 2nd Exp |                | * |
| Midlog 2nd control |                | Midlog 2nd Exp | Midlog 3rd Exp | * |
|                    |                | Midlog 2nd Exp |                | * |
| Midlog 2nd control |                | Midlog 2nd Exp |                | * |
|                    |                | Midlog 2nd Exp | Midlog 3rd Exp | * |
|                    |                | Midlog 2nd Exp |                | * |
|                    |                | Midlog 2nd Exp |                | * |
|                    |                | Midlog 2nd Exp |                | * |
|                    |                | Midlog 2nd Exp | Midlog 3rd Exp | * |
|                    |                | Midlog 2nd Exp |                | * |
|                    |                | Midlog 2nd Exp |                | * |
|                    |                | Midlog 2nd Exp |                | * |
|                    | Midlog 1st Exp | Midlog 2nd Exp |                | * |
|                    |                | Midlog 2nd Exp |                | * |
|                    |                | Midlog 2nd Exp |                | * |
|                    |                | Midlog 2nd Exp |                | * |
|                    |                | Midlog 2nd Exp | Midlog 3rd Exp | * |
|                    | Midlog 1st Exp | Midlog 2nd Exp | Midlog 3rd Exp | * |
|                    |                | Midlog 2nd Exp |                | * |
|                    | Midlog 1st Exp | Midlog 2nd Exp |                | * |
|                    |                | Midlog 2nd Exp |                | * |
|                    |                | Midlog 2nd Exp |                | * |
|                    |                | Midlog 2nd Exp |                | * |
|                    |                | Midlog 2nd Exp | Midlog 3rd Exp | * |
|                    |                | Midlog 2nd Exp | Midlog 3rd Exp | * |
|                    | Midlog 1st Exp | Midlog 2nd Exp |                | * |
|                    |                | Midlog 2nd Exp |                | * |
|                    |                | Midlog 2nd Exp |                | * |
|                    | Midlog 1st Exp | Midlog 2nd Exp |                | * |
|                    |                | Midlog 2nd Exp |                | * |
|                    |                | Midlog 2nd Exp |                | * |
|                    |                | Midlog 2nd Exp |                | * |

Midlog 2nd Exp  
Midlog 2nd Exp  
Midlog 2nd Exp  
Midlog 2nd Exp  
Midlog 2nd Exp

\*

\*

\*

\*

\*
