# Supplementary material
Source: PubMed Central journal article supplement (PMC5108054)
Supplement: NIHMS436991-supplement-S1C.pdf [file NIHMS436991-supplement-S1C.pdf]

| Accession | Entry name  | Protein Name            | Peptide             |
|-----------|-------------|-------------------------|---------------------|
| P00350    | 6PGD_ECOLI  | 6-phosphogluconate deh  | AAVLPANLIQAQR       |
| P00350    | 6PGD_ECOLI  | 6-phosphogluconate deh  | EAYELVAPILTK        |
| P00350    | 6PGD_ECOLI  | 6-phosphogluconate deh  | EFVESLETPR          |
| P00350    | 6PGD_ECOLI  | 6-phosphogluconate deh  | GYTVSIFNR           |
| P00350    | 6PGD_ECOLI  | 6-phosphogluconate deh  | IAAVAEDGEPCTYIGAC   |
| P00350    | 6PGD_ECOLI  | 6-phosphogluconate deh  | IVSYAQGFSQLR        |
| P00350    | 6PGD_ECOLI  | 6-phosphogluconate deh  | VLSGPQAQPAGDKAEFI   |
| P52697    | 6PGL_ECOLI  | 6-phosphogluconolacton  | TASLITVFSVSEDGVSLSK |
| P52697    | 6PGL_ECOLI  | 6-phosphogluconolacton  | WAADIHITPDGR        |
| P52697    | 6PGL_ECOLI  | 6-phosphogluconolacton  | YLYVGVPRPEFR        |
| P00509    | AAT_ECOLI   | Aspartate aminotransfer | AIWEQELTDMR         |
| P00509    | AAT_ECOLI   | Aspartate aminotransfer | QLFVNTLQEK          |
| P00509    | AAT_ECOLI   | Aspartate aminotransfer | SVFNSAGLEVR         |
| P00509    | AAT_ECOLI   | Aspartate aminotransfer | VGACTLVAADSETVDR    |
| P00509    | AAT_ECOLI   | Aspartate aminotransfer | VWVSNPSWPNHK        |
| P24182    | ACCC_ECOLI  | Biotin carboxylase      | IGYPVIK             |
| P24182    | ACCC_ECOLI  | Biotin carboxylase      | NALQELIIDGIK        |
| P24182    | ACCC_ECOLI  | Biotin carboxylase      | SGFIFIGPK           |
| P24182    | ACCC_ECOLI  | Biotin carboxylase      | VVEEAPAPGITPELR     |
| P0A9G6    | ACEA_ECOLI  | Isocitrate lyase        | ADQIQWSAGIEPGDPR    |
| P0A9G6    | ACEA_ECOLI  | Isocitrate lyase        | AmIEAGAAAVHFEDQ     |
| P0A9G6    | ACEA_ECOLI  | Isocitrate lyase        | GSVNPECTLAQLGAAK    |
| P0A9G6    | ACEA_ECOLI  | Isocitrate lyase        | KGYINSLGALTGGQALQI  |
| P0A9G6    | ACEA_ECOLI  | Isocitrate lyase        | LAADVTGVPTLLVAR     |
| P0A9G6    | ACEA_ECOLI  | Isocitrate lyase        | LLAYNCSPSFNWQK      |
| P0A9G6    | ACEA_ECOLI  | Isocitrate lyase        | RADQIQWSAGIEPGDPF   |
| P0A9G6    | ACEA_ECOLI  | Isocitrate lyase        | TQQIEELQKEWTQPR     |
| P0A9G6    | ACEA_ECOLI  | Isocitrate lyase        | WEGITRPPYSAEDVVK    |
| P0A6A3    | ACKA_ECOLI  | Acetate kinase          | EGTRPAVVIPTNEELVIAI |
| P0A6A3    | ACKA_ECOLI  | Acetate kinase          | ESGLLGLTEVTSDCR     |
| P0A6A3    | ACKA_ECOLI  | Acetate kinase          | LGVLGFEVDHER        |
| P0A6A3    | ACKA_ECOLI  | Acetate kinase          | LVLVLNCGSSSLK       |
| P25516    | ACON1_ECOLI | Aconitate hydratase 1   | SDTYGWQEDSTYIR      |
| P25516    | ACON1_ECOLI | Aconitate hydratase 1   | VLENLLR             |
| P25516    | ACON1_ECOLI | Aconitate hydratase 1   | VVIAESFER           |
| P36683    | ACON2_ECOLI | Aconitate hydratase 2   | AGFLAAIAK           |
| P36683    | ACON2_ECOLI | Aconitate hydratase 2   | EGIEPDQPGVVGPIK     |
| P36683    | ACON2_ECOLI | Aconitate hydratase 2   | GFPLAYVGDVVGTSSSR   |
| P36683    | ACON2_ECOLI | Aconitate hydratase 2   | LWVAPPTR            |
| P36683    | ACON2_ECOLI | Aconitate hydratase 2   | YLNFNQLSQYTEK       |
| P22333    | ADD_ECOLI   | Adenosine deaminase     | mIDTTLPLTDIHR       |
| P22333    | ADD_ECOLI   | Adenosine deaminase     | VAFENIEDAAR         |
| P0AE08    | AHPC_ECOLI  | Alkyl hydroperoxide red | EGEATLAPSLDLVGKI    |
| P0AE08    | AHPC_ECOLI  | Alkyl hydroperoxide red | IKYAmIGDPTGALTR     |
| P0AE08    | AHPC_ECOLI  | Alkyl hydroperoxide red | IKYAMIGDPTGALTR     |
| P0AE08    | AHPC_ECOLI  | Alkyl hydroperoxide red | LGVDVYAVSTDTHFTHK   |
| P0AE08    | AHPC_ECOLI  | Alkyl hydroperoxide red | NFDNmREDEGLADR      |

|        |            |                                                        |
|--------|------------|--------------------------------------------------------|
| POAE08 | AHPC_ECOLI | Alkyl hydroperoxide red <sub>u</sub> NGEFIEITEK        |
| POAE08 | AHPC_ECOLI | Alkyl hydroperoxide red <sub>u</sub> NGEFIEITEKDTEGR   |
| POAE08 | AHPC_ECOLI | Alkyl hydroperoxide red <sub>u</sub> WKEGEATLAPSLDLVGK |
| POAE08 | AHPC_ECOLI | Alkyl hydroperoxide red <sub>u</sub> WKEGEATLAPSLDLVGK |
| POAE08 | AHPC_ECOLI | Alkyl hydroperoxide red <sub>u</sub> YAmIGDPTGALTR     |
| POAE08 | AHPC_ECOLI | Alkyl hydroperoxide red <sub>u</sub> YAMIGDPTGALTR     |
| P35340 | AHPF_ECOLI | Alkyl hydroperoxide red <sub>u</sub> ASLSAFDYLR        |
| P35340 | AHPF_ECOLI | Alkyl hydroperoxide red <sub>u</sub> GVFAAGDCTTVPYK    |
| POAB71 | ALF_ECOLI  | Fructose-bisphosphate a AFQELNAIDVL                    |
| POAB71 | ALF_ECOLI  | Fructose-bisphosphate a ANEAYLQGQLGNPK                 |
| POAB71 | ALF_ECOLI  | Fructose-bisphosphate a APVIVQFSNGGASFIAGk             |
| POAB71 | ALF_ECOLI  | Fructose-bisphosphate a IFDFVKPGVITGDDVQK              |
| POAB71 | ALF_ECOLI  | Fructose-bisphosphate a SKIFDFVKPGVITGDDVC             |
| POAB71 | ALF_ECOLI  | Fructose-bisphosphate a VKAPVIVQFSNGGASFIA             |
| POA991 | ALF1_ECOLI | Fructose-bisphosphate a <QIEEISAAFER                   |
| POA991 | ALF1_ECOLI | Fructose-bisphosphate a AGGmGLILGR                     |
| POA991 | ALF1_ECOLI | Fructose-bisphosphate a AGGMGLILGR                     |
| POA991 | ALF1_ECOLI | Fructose-bisphosphate a AGLINSGGAAGGETDLSI             |
| POA991 | ALF1_ECOLI | Fructose-bisphosphate a AHELGmVTVLWAYLR                |
| POA991 | ALF1_ECOLI | Fructose-bisphosphate a AINYGYTDDR                     |
| POA991 | ALF1_ECOLI | Fructose-bisphosphate a AINYGYTDDRVYSK                 |
| POA991 | ALF1_ECOLI | Fructose-bisphosphate a CmTIPSDQLYLPGHDY               |
| POA991 | ALF1_ECOLI | Fructose-bisphosphate a DGVDYHVSADLTGQAN               |
| POA991 | ALF1_ECOLI | Fructose-bisphosphate a IPFLVK                         |
| POA991 | ALF1_ECOLI | Fructose-bisphosphate a LAGTGYLSILPVDQGVEF             |
| POA991 | ALF1_ECOLI | Fructose-bisphosphate a LINAVQDVYLDSK                  |
| POA991 | ALF1_ECOLI | Fructose-bisphosphate a LINAVQDVYLDSKITIA              |
| POA991 | ALF1_ECOLI | Fructose-bisphosphate a LENSEPIDLVR                    |
| POA991 | ALF1_ECOLI | Fructose-bisphosphate a QIEEISAAFER                    |
| POA991 | ALF1_ECOLI | Fructose-bisphosphate a RAGGMGLILGR                    |
| POA991 | ALF1_ECOLI | Fructose-bisphosphate a RQIEEISAAFER                   |
| POA991 | ALF1_ECOLI | Fructose-bisphosphate a TDIAQLLGK                      |
| POA991 | ALF1_ECOLI | Fructose-bisphosphate a TDIAQLLGKDADNLLQH              |
| POA991 | ALF1_ECOLI | Fructose-bisphosphate a VmIDNNRPPAVLR                  |
| POA991 | ALF1_ECOLI | Fructose-bisphosphate a VMIDNNRPPAVLR                  |
| POA991 | ALF1_ECOLI | Fructose-bisphosphate a YQLANCYmGR                     |
| POA991 | ALF1_ECOLI | Fructose-bisphosphate a YQLANCYMGR                     |
| POA955 | ALKH_ECOLI | KHG/KDPG aldolase FCPTGGISPANYR                        |
| POA955 | ALKH_ECOLI | KHG/KDPG aldolase TSAESILTTGPVVPVIVVK                  |
| P77425 | ALLC_ECOLI | Allantoate amidohydrola ELVATLTELCEK                   |
| P77425 | ALLC_ECOLI | Allantoate amidohydrola ELVATLTELCEKEREK               |
| P77425 | ALLC_ECOLI | Allantoate amidohydrola FDEVGNLYGR                     |
| P77425 | ALLC_ECOLI | Allantoate amidohydrola LLYSPEWLETQQQFK                |
| P77425 | ALLC_ECOLI | Allantoate amidohydrola mGDPLVLTFGK                    |
| P77425 | ALLC_ECOLI | Allantoate amidohydrola MGDPLVLTFGK                    |
| P77425 | ALLC_ECOLI | Allantoate amidohydrola NIFGLANPDDVR                   |
| P77425 | ALLC_ECOLI | Allantoate amidohydrola TNITDLAEGVK                    |
| P77425 | ALLC_ECOLI | Allantoate amidohydrola VMHSGAGHDAQIFAPR               |

|        |             |                          |                    |
|--------|-------------|--------------------------|--------------------|
| P77425 | ALLC_ECOLI  | Allantoate amidohydrola  | VPTCmIFIPSINGISHNF |
| POACN4 | ALLR_ECOLI  | HTH-type transcriptional | DISTALGLK          |
| POACN4 | ALLR_ECOLI  | HTH-type transcriptional | DVLSVAGPFmR        |
| POACN4 | ALLR_ECOLI  | HTH-type transcriptional | FVSQGELVR          |
| POACN4 | ALLR_ECOLI  | HTH-type transcriptional | GIAILQYLEK         |
| POACN4 | ALLR_ECOLI  | HTH-type transcriptional | LTEDRFVSQGELVR     |
| POACN4 | ALLR_ECOLI  | HTH-type transcriptional | NGNEAVLIGQLECK     |
| P13016 | AMPD_ECOLI  | 1,6-anhydro-N-acetylm    | ALIDCYPDIAK        |
| P13016 | AMPD_ECOLI  | 1,6-anhydro-N-acetylm    | DGEIVQYVPFDR       |
| P13016 | AMPD_ECOLI  | 1,6-anhydro-N-acetylm    | TDPGPAFDWAR        |
| POAE18 | AMPM_ECOLI  | Methionine aminopeptic   | FVEAEGFSVVR        |
| POAE18 | AMPM_ECOLI  | Methionine aminopeptic   | ITQESLYLALR        |
| PO4825 | AMPN_ECOLI  | Aminopeptidase N         | LIEPLIR            |
| P69503 | APT_ECOLI   | Adenine phosphoribosyl   | QGITSYSLVPFPGH     |
| P69503 | APT_ECOLI   | Adenine phosphoribosyl   | SIQDYKPGILFR       |
| P69503 | APT_ECOLI   | Adenine phosphoribosyl   | VLVVDDLLATGGTIEATV |
| P07639 | AROB_ECOLI  | 3-dehydroquinone synth   | LILPLAIGK          |
| P00963 | ASNA_ECOLI  | Aspartate--ammonia liga  | DLGAVFLVGIGGK      |
| P00963 | ASNA_ECOLI  | Aspartate--ammonia liga  | LGLIEVQAPILSR      |
| P00805 | ASPG2_ECOLI | L-asparaginase 2         | SVFDTLATAAK        |
| Q46829 | BGLA_ECOLI  | 6-phospho-beta-glucosid  | YALCELYER          |
| P12995 | BIOA_ECOLI  | Adenosylmethionine-8-a   | GYLPENLFAPAPQSR    |
| POABF6 | CDD_ECOLI   | Cytidine deaminase       | ADAPLIQWDATSATLK   |
| POABF6 | CDD_ECOLI   | Cytidine deaminase       | AVLAEKADAPLIQWDAT  |
| POABF6 | CDD_ECOLI   | Cytidine deaminase       | EHALRDYLPDAFGPK    |
| POABF6 | CDD_ECOLI   | Cytidine deaminase       | QFmNELNSGLDLR      |
| POABF6 | CDD_ECOLI   | Cytidine deaminase       | TLLmDEQDHGYALTGI   |
| POABF6 | CDD_ECOLI   | Cytidine deaminase       | TPLSNFNVGAIAR      |
| POA6F9 | CH10_ECOLI  | 10 kDa chaperonin        | SAGGIVLTGSAAAK     |
| POA6F9 | CH10_ECOLI  | 10 kDa chaperonin        | VGDIVIFNDGYGVK     |
| POA6F5 | CH60_ECOLI  | 60 kDa chaperonin        | AAVEEGVVAGGGVALIR  |
| POA6F5 | CH60_ECOLI  | 60 kDa chaperonin        | AIAQVGTISANSDETVGK |
| POA6F5 | CH60_ECOLI  | 60 kDa chaperonin        | ANDAAGDGTATVLA     |
| POA6F5 | CH60_ECOLI  | 60 kDa chaperonin        | EIELEDKFENmGAQmV   |
| POA6F5 | CH60_ECOLI  | 60 kDa chaperonin        | EmLPVLEAVAK        |
| POA6F5 | CH60_ECOLI  | 60 kDa chaperonin        | GVNVLADAVK         |
| POA6F5 | CH60_ECOLI  | 60 kDa chaperonin        | QIVLNCGEEPSVVANTVI |
| POA6F5 | CH60_ECOLI  | 60 kDa chaperonin        | VVINKDTTTTIDGVGEEA |
| POABH7 | CISY_ECOLI  | Citrate synthase         | GTLGQDVIDIR        |
| P63284 | CLPB_ECOLI  | Chaperone protein clpB   | AAGATTANITQAIEQmF  |
| P63284 | CLPB_ECOLI  | Chaperone protein clpB   | AIDLIDEAASSIR      |
| P63284 | CLPB_ECOLI  | Chaperone protein clpB   | ALANFmFDSDEAmVR    |
| P63284 | CLPB_ECOLI  | Chaperone protein clpB   | GELHCVGATTLDEYR    |
| P63284 | CLPB_ECOLI  | Chaperone protein clpB   | GYEIHISDEALK       |
| P63284 | CLPB_ECOLI  | Chaperone protein clpB   | LEVNEDRIVAVQ       |
| P63284 | CLPB_ECOLI  | Chaperone protein clpB   | LLENGYDPVYGAR      |
| P63284 | CLPB_ECOLI  | Chaperone protein clpB   | LPQVEGTGGDVQPSQD   |
| P63284 | CLPB_ECOLI  | Chaperone protein clpB   | LVGAPPGYVGYEEGGYL  |

|        |            |                           |                     |
|--------|------------|---------------------------|---------------------|
| P63284 | CLPB_ECOLI | Chaperone protein clpB    | mSELQYGKIPLELEK     |
| P63284 | CLPB_ECOLI | Chaperone protein clpB    | NKVTDAEIAEVLAR      |
| P63284 | CLPB_ECOLI | Chaperone protein clpB    | NNPVLIGEPGVGK       |
| P63284 | CLPB_ECOLI | Chaperone protein clpB    | QEGNVILFIDELHTmVG   |
| P63284 | CLPB_ECOLI | Chaperone protein clpB    | QLPDKAIDLIDEAASSIR  |
| P63284 | CLPB_ECOLI | Chaperone protein clpB    | VFVAEPSVEDTIALR     |
| P63284 | CLPB_ECOLI | Chaperone protein clpB    | VIGQNEAVDAVSNAIR    |
| P63284 | CLPB_ECOLI | Chaperone protein clpB    | VLALDmGALVAGAK      |
| P63284 | CLPB_ECOLI | Chaperone protein clpB    | VLALDMGALVAGAK      |
| P63284 | CLPB_ECOLI | Chaperone protein clpB    | VTDAEIAEVLAR        |
| POACJ8 | CRP_ECOLI  | Catabolite gene activator | IAQTLLNLAK          |
| POACJ8 | CRP_ECOLI  | Catabolite gene activator | VGNLAFLDVTGR        |
| POABK5 | CYSK_ECOLI | Cysteine synthase A       | ALGANLVLTEGAK       |
| POABK5 | CYSK_ECOLI | Cysteine synthase A       | GAIQKAEIIVASNPEK    |
| POABK5 | CYSK_ECOLI | Cysteine synthase A       | GVLKPGVELVEPTSGNTG  |
| POABK5 | CYSK_ECOLI | Cysteine synthase A       | IFEDNSLTIGHTPLVR    |
| POABK5 | CYSK_ECOLI | Cysteine synthase A       | IGANmiWDAEK         |
| POABK5 | CYSK_ECOLI | Cysteine synthase A       | IGANmiWDAEKR        |
| POABK5 | CYSK_ECOLI | Cysteine synthase A       | IGANMIWDAEK         |
| POABK5 | CYSK_ECOLI | Cysteine synthase A       | IGANMIWDAEKR        |
| POABK5 | CYSK_ECOLI | Cysteine synthase A       | IQGIGAGFIPANLDLK    |
| POABK5 | CYSK_ECOLI | Cysteine synthase A       | LmEEEGILAGISSGAAV   |
| POABK5 | CYSK_ECOLI | Cysteine synthase A       | LMEEEGILAGISSGAAVA  |
| POABK5 | CYSK_ECOLI | Cysteine synthase A       | LTLTmPETmsIER       |
| POABK5 | CYSK_ECOLI | Cysteine synthase A       | LVDKVGITNEEAISTAR   |
| POABK5 | CYSK_ECOLI | Cysteine synthase A       | NIVVILPSSGER        |
| POABK5 | CYSK_ECOLI | Cysteine synthase A       | RLmEEEGILAGISSGAA   |
| POABK5 | CYSK_ECOLI | Cysteine synthase A       | RLMEEEGILAGISSGAAV  |
| POABK5 | CYSK_ECOLI | Cysteine synthase A       | SKIFEDNSLTIGHTPLVR  |
| POABK5 | CYSK_ECOLI | Cysteine synthase A       | VIGITNEEAISTAR      |
| POABK5 | CYSK_ECOLI | Cysteine synthase A       | YLLLQQFSNPANPEIHEK  |
| POABK5 | CYSK_ECOLI | Cysteine synthase A       | YLSTALFADLFTEK      |
| POABK5 | CYSK_ECOLI | Cysteine synthase A       | YLSTALFADLFTEKELQQ  |
| P22255 | CYSQ_ECOLI | 3'(2'),5'-bisphosphate nu | ESFLNPGFR           |
| P22255 | CYSQ_ECOLI | 3'(2'),5'-bisphosphate nu | NAGDAImQVVDGTKP     |
| POA6L2 | DAPA_ECOLI | Dihydrodipicolinate synt  | ELGLVATDTLR         |
| POA6L2 | DAPA_ECOLI | Dihydrodipicolinate synt  | IPVIAGTGANATAEAISSL |
| POA9D8 | DAPD_ECOLI | 2,3,4,5-tetrahydropyridir | EAVNQVIALLDSGALR    |
| POA9D8 | DAPD_ECOLI | 2,3,4,5-tetrahydropyridir | VGINELLR            |
| POACF0 | DBHA_ECOLI | DNA-binding protein HU-   | AALESTLAAITESLK     |
| POACF0 | DBHA_ECOLI | DNA-binding protein HU-   | EGDAVQLVGFGTFK      |
| POACF0 | DBHA_ECOLI | DNA-binding protein HU-   | IAAANVPAFVSGK       |
| POACF0 | DBHA_ECOLI | DNA-binding protein HU-   | TQLIDVIAEKAELSK     |
| POACF0 | DBHA_ECOLI | DNA-binding protein HU-   | TQLIDVIAEK          |
| POACF4 | DBHB_ECOLI | DNA-binding protein HU-   | ALDAIISVTESLK       |
| POACF4 | DBHB_ECOLI | DNA-binding protein HU-   | EGDDVALVGFGTFAVK    |
| POACF4 | DBHB_ECOLI | DNA-binding protein HU-   | SQLIDKIAAGADISK     |
| P69908 | DCEA_ECOLI | Glutamate decarboxylas    | LKDGEDPGYTLYDLSEK   |

|        |            |                                        |                    |
|--------|------------|----------------------------------------|--------------------|
| P69908 | DCEA_ECOLI | Glutamate decarboxylase                | QNLATFCQTWDDENVH   |
| P69908 | DCEA_ECOLI | Glutamate decarboxylase                | VQNASYQVAAYLADEIA  |
| P69908 | DCEA_ECOLI | Glutamate decarboxylase                | YWDVELR            |
| POAED9 | DCM_ECOLI  | DNA-cytosine methyltransferase         | FIDLFAGIGGIR       |
| POAED9 | DCM_ECOLI  | DNA-cytosine methyltransferase         | IVLVGFR            |
| POAED9 | DCM_ECOLI  | DNA-cytosine methyltransferase         | QFGNSVVVPVFAAVAK   |
| POA6J8 | DDLA_ECOLI | D-alanine--D-alanine ligase            | FDVVLLGIDK         |
| POA6J8 | DDLA_ECOLI | D-alanine--D-alanine ligase            | LIELALER           |
| POA9P6 | DEAD_ECOLI | Cold-shock DEAD box protein            | ALLFVENR           |
| POA9P6 | DEAD_ECOLI | Cold-shock DEAD box protein            | GVNVVALYGGQR       |
| POA6K3 | DEF_ECOLI  | Peptide deformylase                    | LVLINPELLEK        |
| POC0V0 | DEGP_ECOLI | Protease domain                        | SDIALIQIQNPK       |
| POA6K6 | DEOB_ECOLI | Phosphopentomutase                     | ATGLDALFDATIK      |
| POA6K6 | DEOB_ECOLI | Phosphopentomutase                     | DVAGYAAGLELFDNR    |
| POA6K6 | DEOB_ECOLI | Phosphopentomutase                     | EHIPVLVYGPK        |
| POA6K6 | DEOB_ECOLI | Phosphopentomutase                     | ETFADIGQTLAK       |
| POA6K6 | DEOB_ECOLI | Phosphopentomutase                     | GPLNLPNLTR         |
| POA6K6 | DEOB_ECOLI | Phosphopentomutase                     | KGPLNLPNLTR        |
| POA6K6 | DEOB_ECOLI | Phosphopentomutase                     | TGNRHDLAVEPPAPTVL  |
| POA6K6 | DEOB_ECOLI | Phosphopentomutase                     | YFGTSDMEYGK        |
| POA6K6 | DEOB_ECOLI | Phosphopentomutase                     | YFGTSDMEYGK        |
| POA6L0 | DEOC_ECOLI | Deoxyribose-phosphate                  | AAIAYGADEVVVFPYR   |
| POA6L0 | DEOC_ECOLI | Deoxyribose-phosphate                  | ALMAGNEQVGFDLVK    |
| POA6L0 | DEOC_ECOLI | Deoxyribose-phosphate                  | FGASSLLASLLK       |
| POA6L0 | DEOC_ECOLI | Deoxyribose-phosphate                  | IATVTNFPHGNDIDIAL  |
| POA6L0 | DEOC_ECOLI | Deoxyribose-phosphate                  | LMDLTTLNDDDTDEK    |
| POA6L0 | DEOC_ECOLI | Deoxyribose-phosphate                  | TPVGNTAAICIYPR     |
| POA6L0 | DEOC_ECOLI | Deoxyribose-phosphate                  | VIIETGELKDEALIR    |
| POABP8 | DEOD_ECOLI | Purine nucleoside phosphatase          | IALESVLLGDKE       |
| POABP8 | DEOD_ECOLI | Purine nucleoside phosphatase          | YIAETFLEDAR        |
| POABP8 | DEOD_ECOLI | Purine nucleoside phosphatase          | YIAETFLEDAREVNNVR  |
| P76015 | DHAK_ECOLI | PTS-dependent dihydroxypyruvate kinase | LINDVQDVLDEQLAGLA  |
| P76015 | DHAK_ECOLI | PTS-dependent dihydroxypyruvate kinase | LVGAAAERGDSDLACAE  |
| P76015 | DHAK_ECOLI | PTS-dependent dihydroxypyruvate kinase | NYTGDILNFETATELLHD |
| P76015 | DHAK_ECOLI | PTS-dependent dihydroxypyruvate kinase | VIALVNNLGATPLSELYG |
| P76015 | DHAK_ECOLI | PTS-dependent dihydroxypyruvate kinase | VTTVVIDDDVAVK      |
| P76015 | DHAK_ECOLI | PTS-dependent dihydroxypyruvate kinase | VTTVVIDDDVAVKDSLYI |
| P37349 | DHAM_ECOLI | PTS-dependent dihydroxypyruvate kinase | GICLSAGSPVSHSALIAR |
| P37349 | DHAM_ECOLI | PTS-dependent dihydroxypyruvate kinase | GPEAEEALIAFR       |
| POABS1 | DKSA_ECOLI | DnaK suppressor protein                | AAQEEEFSLERL       |
| POABS1 | DKSA_ECOLI | DnaK suppressor protein                | KVEDEDFGYCESCGVEIC |
| POABS1 | DKSA_ECOLI | DnaK suppressor protein                | TVTHMQDEAANFPDP    |
| POA9P0 | DLDH_ECOLI | Dihydrolipoyl dehydrogenase            | AGVEVDDRGFIR       |
| POA9P0 | DLDH_ECOLI | Dihydrolipoyl dehydrogenase            | ALAEHGIVFGEPK      |
| POA9P0 | DLDH_ECOLI | Dihydrolipoyl dehydrogenase            | APAEPQRYDAVLVAIGR  |
| POA9P0 | DLDH_ECOLI | Dihydrolipoyl dehydrogenase            | CADLGLETVIVER      |
| POA9P0 | DLDH_ECOLI | Dihydrolipoyl dehydrogenase            | EDGIYVTMEGK        |
| POA9P0 | DLDH_ECOLI | Dihydrolipoyl dehydrogenase            | EKGISYETATFPWAASGF |



|        |            |                                             |
|--------|------------|---------------------------------------------|
| P0A9P0 | DLDH_ECOLI | Dihydrolipoyl dehydroge EKVINQLTGGLAGmAK    |
| P0A9P0 | DLDH_ECOLI | Dihydrolipoyl dehydroge EKVINQLTGGLAGMAK    |
| P0A9P0 | DLDH_ECOLI | Dihydrolipoyl dehydroge FNLmLETK            |
| P0A9P0 | DLDH_ECOLI | Dihydrolipoyl dehydroge FNLMLETK            |
| P0A9P0 | DLDH_ECOLI | Dihydrolipoyl dehydroge FTGANTLEVEGENGK     |
| P0A9P0 | DLDH_ECOLI | Dihydrolipoyl dehydroge GISYETATFPWAASGR    |
| P0A9P0 | DLDH_ECOLI | Dihydrolipoyl dehydroge GVHEGHVAAEVIAGK     |
| P0A9P0 | DLDH_ECOLI | Dihydrolipoyl dehydroge IWDSTDALELK         |
| P0A9P0 | DLDH_ECOLI | Dihydrolipoyl dehydroge IWDSTDALELKEVPER    |
| P0A9P0 | DLDH_ECOLI | Dihydrolipoyl dehydroge KAPAEPQRYDAVLVAIGI  |
| P0A9P0 | DLDH_ECOLI | Dihydrolipoyl dehydroge KFNLmLETK           |
| P0A9P0 | DLDH_ECOLI | Dihydrolipoyl dehydroge KFNLMLETK           |
| P0A9P0 | DLDH_ECOLI | Dihydrolipoyl dehydroge LIFDKESHR           |
| P0A9P0 | DLDH_ECOLI | Dihydrolipoyl dehydroge PIQLPFIHEDPR        |
| P0A9P0 | DLDH_ECOLI | Dihydrolipoyl dehydroge STEIKTQVVVLGAGPAG`  |
| P0A9P0 | DLDH_ECOLI | Dihydrolipoyl dehydroge TDIDKIR             |
| P0A9P0 | DLDH_ECOLI | Dihydrolipoyl dehydroge TNVPHIFAIGDIVGQPmI  |
| P0A9P0 | DLDH_ECOLI | Dihydrolipoyl dehydroge TNVPHIFAIGDIVGQPMI  |
| P0A9P0 | DLDH_ECOLI | Dihydrolipoyl dehydroge TQVVVLGAGPAGYSAAF   |
| P0A9P0 | DLDH_ECOLI | Dihydrolipoyl dehydroge TVINFDNAIIAAGSR     |
| P0A9P0 | DLDH_ECOLI | Dihydrolipoyl dehydroge VINQLTGGLAGmAK      |
| P0A9P0 | DLDH_ECOLI | Dihydrolipoyl dehydroge VINQLTGGLAGMAK      |
| P0A9P0 | DLDH_ECOLI | Dihydrolipoyl dehydroge VIPSIAYTEPEVAWVGLT  |
| P0A9P0 | DLDH_ECOLI | Dihydrolipoyl dehydroge VIPSIAYTEPEVAWVGLT  |
| P0A9P0 | DLDH_ECOLI | Dihydrolipoyl dehydroge VTAVEAKEDGIYVTmEG   |
| P0A9P0 | DLDH_ECOLI | Dihydrolipoyl dehydroge VTAVEAKEDGIYVTmEG   |
| P0A9P0 | DLDH_ECOLI | Dihydrolipoyl dehydroge VTAVEAKEDGIYVTMEG   |
| P0A9P0 | DLDH_ECOLI | Dihydrolipoyl dehydroge VTAVEAKEDGIYVTMEG   |
| P0A9P0 | DLDH_ECOLI | Dihydrolipoyl dehydroge YDAVLVAIGR          |
| P0A9P0 | DLDH_ECOLI | Dihydrolipoyl dehydroge YNTLGGVCLNVGCIPSK   |
| P0AEE8 | DMA_ECOLI  | DNA adenine methylase AVLFLYLNR             |
| P0A6Y8 | DNAK_ECOLI | Chaperone protein dnaK <QAVTNPQNTLFAIK      |
| P0A6Y8 | DNAK_ECOLI | Chaperone protein dnaK <QAVTNPQNTLFAIKR     |
| P0A6Y8 | DNAK_ECOLI | Chaperone protein dnaK AADNKSLGQFNLDGINP    |
| P0A6Y8 | DNAK_ECOLI | Chaperone protein dnaK AKIELSSAQQTQDVNLPYI` |
| P0A6Y8 | DNAK_ECOLI | Chaperone protein dnaK AKLESLVEDLVNR        |
| P0A6Y8 | DNAK_ECOLI | Chaperone protein dnaK ASSGLNEDEIQK         |
| P0A6Y8 | DNAK_ECOLI | Chaperone protein dnaK DAEANAADRKFEELVQ     |
| P0A6Y8 | DNAK_ECOLI | Chaperone protein dnaK DDDVVDAEFEEVK        |
| P0A6Y8 | DNAK_ECOLI | Chaperone protein dnaK DQGIDLR              |
| P0A6Y8 | DNAK_ECOLI | Chaperone protein dnaK DVSImPFK             |
| P0A6Y8 | DNAK_ECOLI | Chaperone protein dnaK DVSIMPFK             |
| P0A6Y8 | DNAK_ECOLI | Chaperone protein dnaK FQDEEVQR             |
| P0A6Y8 | DNAK_ECOLI | Chaperone protein dnaK FQDEEVQRDVSImPFK     |
| P0A6Y8 | DNAK_ECOLI | Chaperone protein dnaK FQDEEVQRDVSIMPFK     |
| P0A6Y8 | DNAK_ECOLI | Chaperone protein dnaK GKIIGIDLGTNSCVAIml   |
| P0A6Y8 | DNAK_ECOLI | Chaperone protein dnaK HSQVFSTAEDNQSAVTII   |

|        |             |                                             |
|--------|-------------|---------------------------------------------|
| P0A6Y8 | DNAK_ECOLI  | Chaperone protein dnaK IAGLEVKR             |
| P0A6Y8 | DNAK_ECOLI  | Chaperone protein dnaK IELSSAQQTQDNLPIYITAI |
| P0A6Y8 | DNAK_ECOLI  | Chaperone protein dnaK IIAADNGDAWVEVK       |
| P0A6Y8 | DNAK_ECOLI  | Chaperone protein dnaK IIGIDLGTNNSCVAIMDG   |
| P0A6Y8 | DNAK_ECOLI  | Chaperone protein dnaK IINEPTAAALAYGLDK     |
| P0A6Y8 | DNAK_ECOLI  | Chaperone protein dnaK IINEPTAAALAYGLDKGT   |
| P0A6Y8 | DNAK_ECOLI  | Chaperone protein dnaK KDVNPDEAVAIGAAVQC    |
| P0A6Y8 | DNAK_ECOLI  | Chaperone protein dnaK KFEELVQTR            |
| P0A6Y8 | DNAK_ECOLI  | Chaperone protein dnaK KTAEDYLGEPTVEAVITV   |
| P0A6Y8 | DNAK_ECOLI  | Chaperone protein dnaK LESLVEDLVNR          |
| P0A6Y8 | DNAK_ECOLI  | Chaperone protein dnaK LINYLVEEFK           |
| P0A6Y8 | DNAK_ECOLI  | Chaperone protein dnaK LINYLVEEFKK          |
| P0A6Y8 | DNAK_ECOLI  | Chaperone protein dnaK LINYLVEEFKKDQGIDLR   |
| P0A6Y8 | DNAK_ECOLI  | Chaperone protein dnaK mAPPQISAEVLK         |
| P0A6Y8 | DNAK_ECOLI  | Chaperone protein dnaK mAPPQISAEVLKK        |
| P0A6Y8 | DNAK_ECOLI  | Chaperone protein dnaK mQELAQVSQK           |
| P0A6Y8 | DNAK_ECOLI  | Chaperone protein dnaK MAPPQISAEVLK         |
| P0A6Y8 | DNAK_ECOLI  | Chaperone protein dnaK MAPPQISAEVLKK        |
| P0A6Y8 | DNAK_ECOLI  | Chaperone protein dnaK NDPLAMQR             |
| P0A6Y8 | DNAK_ECOLI  | Chaperone protein dnaK QAVTNPQNTLFAIK       |
| P0A6Y8 | DNAK_ECOLI  | Chaperone protein dnaK QAVTNPQNTLFAIKR      |
| P0A6Y8 | DNAK_ECOLI  | Chaperone protein dnaK RFQDEEVQR            |
| P0A6Y8 | DNAK_ECOLI  | Chaperone protein dnaK RIINEPTAAALAYGLDK    |
| P0A6Y8 | DNAK_ECOLI  | Chaperone protein dnaK RIINEPTAAALAYGLDKG   |
| P0A6Y8 | DNAK_ECOLI  | Chaperone protein dnaK SLGQFNLDGINPAPR      |
| P0A6Y8 | DNAK_ECOLI  | Chaperone protein dnaK TAEDYLGEPTVEAVITVP   |
| P0A6Y8 | DNAK_ECOLI  | Chaperone protein dnaK TFEVLATNGDTHLGGED    |
| P0A6Y8 | DNAK_ECOLI  | Chaperone protein dnaK TTPSIIAYTQDGETLVGQ   |
| P0A6Y8 | DNAK_ECOLI  | Chaperone protein dnaK TTPSIIAYTQDGETLVGQ   |
| P0A6Y8 | DNAK_ECOLI  | Chaperone protein dnaK VAEFFGKEPR           |
| P0A6Y8 | DNAK_ECOLI  | Chaperone protein dnaK VALQDAGLSVSDIDDVIL   |
| P0A6Y8 | DNAK_ECOLI  | Chaperone protein dnaK VLENAEGDR            |
| P0A6Y8 | DNAK_ECOLI  | Chaperone protein dnaK VLENAEGDRTPSIIAYTC   |
| P0A6Y8 | DNAK_ECOLI  | Chaperone protein dnaK VLENAEGDRTPSIIAYTC   |
| P0A988 | DPO3B_ECOLI | DNA polymerase III subu AHVGDIFITSK         |
| P0A988 | DPO3B_ECOLI | DNA polymerase III subu EHLLKPLQQVSGPLGGR   |
| P0A988 | DPO3B_ECOLI | DNA polymerase III subu FFDICR              |
| P0A988 | DPO3B_ECOLI | DNA polymerase III subu GLPEGAEIAVQLEGER    |
| P0A988 | DPO3B_ECOLI | DNA polymerase III subu GVIELMR             |
| P0A988 | DPO3B_ECOLI | DNA polymerase III subu HLEAGCDLLK          |
| P0A988 | DPO3B_ECOLI | DNA polymerase III subu KFFDICR             |
| P0A988 | DPO3B_ECOLI | DNA polymerase III subu KGVIELmR            |
| P0A988 | DPO3B_ECOLI | DNA polymerase III subu KGVIELMR            |
| P0A988 | DPO3B_ECOLI | DNA polymerase III subu LAVCSmPIGQSLPSHSV   |
| P0A988 | DPO3B_ECOLI | DNA polymerase III subu LAVCSMPIGQSLPSHSVI  |
| P0A988 | DPO3B_ECOLI | DNA polymerase III subu LIATQFSmAHQDVR      |
| P0A988 | DPO3B_ECOLI | DNA polymerase III subu LIATQFSMAHQDVR      |
| P0A988 | DPO3B_ECOLI | DNA polymerase III subu LYVSENQLK           |

|        |             |                          |                     |
|--------|-------------|--------------------------|---------------------|
| POA988 | DPO3B_ECOLI | DNA polymerase III subu  | mLDGGDNPLR          |
| POA988 | DPO3B_ECOLI | DNA polymerase III subu  | mmLTDSVSSVQIEDA/    |
| POA988 | DPO3B_ECOLI | DNA polymerase III subu  | mmLTDSVSSVQIEDA/    |
| POA988 | DPO3B_ECOLI | DNA polymerase III subu  | mMLTDSVSSVQIEDA/    |
| POA988 | DPO3B_ECOLI | DNA polymerase III subu  | MLDGGDNPLR          |
| POA988 | DPO3B_ECOLI | DNA polymerase III subu  | MMLTDSVSSVQIEDAAS   |
| POA988 | DPO3B_ECOLI | DNA polymerase III subu  | NPKHLEAGCDLLK       |
| POA988 | DPO3B_ECOLI | DNA polymerase III subu  | RLIEATQFSMAHQDVR    |
| POA988 | DPO3B_ECOLI | DNA polymerase III subu  | VALVQPHEPGATTVPAR   |
| POA988 | DPO3B_ECOLI | DNA polymerase III subu  | VQIGSNIR            |
| POA988 | DPO3B_ECOLI | DNA polymerase III subu  | YYLNGmLFETEGEELR    |
| POA988 | DPO3B_ECOLI | DNA polymerase III subu  | YYLNGMLFETEGEELR    |
| POABT2 | DPS_ECOLI   | DNA protection during st | AIGEAKDDDTADILTAAS  |
| POABT2 | DPS_ECOLI   | DNA protection during st | AVQLGGVALGTTQVINS   |
| POABT2 | DPS_ECOLI   | DNA protection during st | ELADRYAIVANDVR      |
| POABT2 | DPS_ECOLI   | DNA protection during st | GANFIAVHEmLDGFR     |
| POABT2 | DPS_ECOLI   | DNA protection during st | GANFIAVHEMLDGFR     |
| POABT2 | DPS_ECOLI   | DNA protection during st | KAIGEAKDDDTADILTAAP |
| POABT2 | DPS_ECOLI   | DNA protection during st | QVIQFIDLSLITK       |
| POABT2 | DPS_ECOLI   | DNA protection during st | TALIDHLDTMAER       |
| P23827 | ECOT_ECOLI  | Ecotin                   | FVTAYLGDAGmLR       |
| P23827 | ECOT_ECOLI  | Ecotin                   | FVTAYLGDAGMLR       |
| P23827 | ECOT_ECOLI  | Ecotin                   | KFVTAYLGDAGmLR      |
| P23827 | ECOT_ECOLI  | Ecotin                   | LPIVVYTPDNVDVK      |
| POA6M8 | EFG_ECOLI   | Elongation factor G      | AGDIAAAIGLK         |
| POA6M8 | EFG_ECOLI   | Elongation factor G      | AGPLAGYPVVDmGIR     |
| POA6M8 | EFG_ECOLI   | Elongation factor G      | AGPLAGYPVVDMGIR     |
| POA6M8 | EFG_ECOLI   | Elongation factor G      | AKPVLLEPIMK         |
| POA6M8 | EFG_ECOLI   | Elongation factor G      | ASYTmEFLKYDEAPSN'   |
| POA6M8 | EFG_ECOLI   | Elongation factor G      | ASYTMEFLKYDEAPSNV,  |
| POA6M8 | EFG_ECOLI   | Elongation factor G      | DVTTGDTLCDPDAPIILEI |
| POA6M8 | EFG_ECOLI   | Elongation factor G      | EFNVEANVGKQPQVAYR   |
| POA6M8 | EFG_ECOLI   | Elongation factor G      | GGVIPGEYIPAVDK      |
| POA6M8 | EFG_ECOLI   | Elongation factor G      | GITITSAATTAFWSGmA   |
| POA6M8 | EFG_ECOLI   | Elongation factor G      | GITITSAATTAFWSGMAI  |
| POA6M8 | EFG_ECOLI   | Elongation factor G      | GQYGHVVIDmYPLEPG    |
| POA6M8 | EFG_ECOLI   | Elongation factor G      | GYEFINDIK           |
| POA6M8 | EFG_ECOLI   | Elongation factor G      | HASDDEPFSAFAFK      |
| POA6M8 | EFG_ECOLI   | Elongation factor G      | IATDPFVGNLTFRR      |
| POA6M8 | EFG_ECOLI   | Elongation factor G      | IGEVHDGAATmDWmE     |
| POA6M8 | EFG_ECOLI   | Elongation factor G      | IGEVHDGAATmDWME     |
| POA6M8 | EFG_ECOLI   | Elongation factor G      | IGEVHDGAATMDWmE     |
| POA6M8 | EFG_ECOLI   | Elongation factor G      | IHAEVPLSEmFGYATQL   |
| POA6M8 | EFG_ECOLI   | Elongation factor G      | IHAEVPLSEMFGYATQLF  |
| POA6M8 | EFG_ECOLI   | Elongation factor G      | ILFYTGTVNHK         |
| POA6M8 | EFG_ECOLI   | Elongation factor G      | INIIDTPGHVDFTIEVER  |
| POA6M8 | EFG_ECOLI   | Elongation factor G      | LGANPVPLQLAIGAEHI   |



|        |             |                            |                     |
|--------|-------------|----------------------------|---------------------|
| POA6M8 | EFG_ECOLI   | Elongation factor G        | LHFGSYHDVDSSELAFK   |
| POA6M8 | EFG_ECOLI   | Elongation factor G        | mEFPEPVISIAVEPK     |
| POA6M8 | EFG_ECOLI   | Elongation factor G        | MEFPEPVISIAVEPK     |
| POA6M8 | EFG_ECOLI   | Elongation factor G        | VEVETPEENTGDVIGDLS  |
| POA6M8 | EFG_ECOLI   | Elongation factor G        | VLNNEIILVTCGSAFK    |
| POA6M8 | EFG_ECOLI   | Elongation factor G        | VYSGVVNSGDTVLSNVK   |
| POA6M8 | EFG_ECOLI   | Elongation factor G        | YDEAPSNVAQAVIEAR    |
| POA6M8 | EFG_ECOLI   | Elongation factor G        | YLGGEELTEAEIK       |
| POA6M8 | EFG_ECOLI   | Elongation factor G        | YLGGEELTEAEIKGALR   |
| POA6N4 | EFP_ECOLI   | Elongation factor P        | VPLFVQIGEVIK        |
| POA6N8 | EFPL_ECOLI  | Elongation factor P-like p | FKGDDIVDTVTLTR      |
| POA6P1 | EFTS_ECOLI  | Elongation factor Ts       | DAGFQAFADK          |
| POA6P1 | EFTS_ECOLI  | Elongation factor Ts       | DAGFQAFADKVLDAAV/   |
| POA6P1 | EFTS_ECOLI  | Elongation factor Ts       | FEVGEIEKVETDFAAEV   |
| POA6P1 | EFTS_ECOLI  | Elongation factor Ts       | FTGEVSLTGQPFV mEPS  |
| POA6P1 | EFTS_ECOLI  | Elongation factor Ts       | VAALEGDVLSYQHGAIF   |
| POCE47 | EFTU1_ECOLI | Elongation factor Tu 1     | <QVGVPYIIVFLNK      |
| POCE47 | EFTU1_ECOLI | Elongation factor Tu 1     | AFDQIDNAPEEK        |
| POCE47 | EFTU1_ECOLI | Elongation factor Tu 1     | AGENVGVLLR          |
| POCE47 | EFTU1_ECOLI | Elongation factor Tu 1     | AIDKPFLPIEDVFSISGR  |
| POCE47 | EFTU1_ECOLI | Elongation factor Tu 1     | ALEGDAEWEAK         |
| POCE47 | EFTU1_ECOLI | Elongation factor Tu 1     | EHILLGR             |
| POCE47 | EFTU1_ECOLI | Elongation factor Tu 1     | ELLSQYDFPGDDTPIVR   |
| POCE47 | EFTU1_ECOLI | Elongation factor Tu 1     | FESEVYILSK          |
| POCE47 | EFTU1_ECOLI | Elongation factor Tu 1     | FESEVYILSKDEGGR     |
| POCE47 | EFTU1_ECOLI | Elongation factor Tu 1     | GIKVGEEVEIVGIK      |
| POCE47 | EFTU1_ECOLI | Elongation factor Tu 1     | GITINTSHVEYDTPTR    |
| POCE47 | EFTU1_ECOLI | Elongation factor Tu 1     | GYRPQFYFR           |
| POCE47 | EFTU1_ECOLI | Elongation factor Tu 1     | ILELAGFLDSYIPEPER   |
| POCE47 | EFTU1_ECOLI | Elongation factor Tu 1     | mVVTLIHPIAmDDGLF    |
| POCE47 | EFTU1_ECOLI | Elongation factor Tu 1     | mVVTLIHPIAMDDGLF    |
| POCE47 | EFTU1_ECOLI | Elongation factor Tu 1     | MVVTLIHPIAmDDGLR    |
| POCE47 | EFTU1_ECOLI | Elongation factor Tu 1     | MVVTLIHPIAMDDGLR    |
| POCE47 | EFTU1_ECOLI | Elongation factor Tu 1     | NmitGAAQmDGAILV     |
| POCE47 | EFTU1_ECOLI | Elongation factor Tu 1     | NmitGAAQmDGAILV     |
| POCE47 | EFTU1_ECOLI | Elongation factor Tu 1     | QVGVPYIIVFLNK       |
| POCE47 | EFTU1_ECOLI | Elongation factor Tu 1     | STCTGVEMFR          |
| POCE47 | EFTU1_ECOLI | Elongation factor Tu 1     | TTDVTGTIELPEGVE mVi |
| POCE47 | EFTU1_ECOLI | Elongation factor Tu 1     | TTLTAAITTVLAK       |
| POCE47 | EFTU1_ECOLI | Elongation factor Tu 1     | VGEEVEIVGIK         |
| POCE47 | EFTU1_ECOLI | Elongation factor Tu 1     | VGEEVEIVGIKETQK     |
| POA6P7 | ENGB_ECOLI  | Probable GTP-binding pr    | HLPSTGIEVAFAGR      |
| POA6P7 | ENGB_ECOLI  | Probable GTP-binding pr    | TQLINLFEVADGKR      |
| POA6P9 | ENO_ECOLI   | Enolase                    | AFTSEEFTHFLEELTK    |
| POA6P9 | ENO_ECOLI   | Enolase                    | AVAAVNGPIAQALIGK    |
| POA6P9 | ENO_ECOLI   | Enolase                    | AVAAVNGPIAQALIGKD.  |
| POA6P9 | ENO_ECOLI   | Enolase                    | DAGYTAVISHR         |
| POA6P9 | ENO_ECOLI   | Enolase                    | DQAGIDKImIDLGTEN    |

|        |             |                                               |                     |
|--------|-------------|-----------------------------------------------|---------------------|
| P0A6P9 | ENO_ECOLI   | Enolase                                       | FGANAILAVSLANAKAA/  |
| P0A6P9 | ENO_ECOLI   | Enolase                                       | FGANAILAVSLANAK     |
| P0A6P9 | ENO_ECOLI   | Enolase                                       | FNQIGSLTETLAAIK     |
| P0A6P9 | ENO_ECOLI   | Enolase                                       | GIANSILIK           |
| P0A6P9 | ENO_ECOLI   | Enolase                                       | GmNTAVGDEGGYAPI     |
| P0A6P9 | ENO_ECOLI   | Enolase                                       | GNPTVEAEVHLEGGFVC   |
| P0A6P9 | ENO_ECOLI   | Enolase                                       | IMIDLDTENK          |
| P0A6P9 | ENO_ECOLI   | Enolase                                       | IQLVGDDLFTNTK       |
| P0A6P9 | ENO_ECOLI   | Enolase                                       | SGETEDATIADLAVGTA/  |
| P0A6P9 | ENO_ECOLI   | Enolase                                       | SKFGANAILAVSLANAK   |
| P0A6P9 | ENO_ECOLI   | Enolase                                       | VLGDKIQLVGDDLFTN`   |
| P0A6Q3 | FABA_ECOLI  | 3-hydroxydecanoyl-[acyl: GPQLPAPNmLmmDR       |                     |
| P0A6Q3 | FABA_ECOLI  | 3-hydroxydecanoyl-[acyl: GPQLPAPNmLmMDR       |                     |
| P0A6Q3 | FABA_ECOLI  | 3-hydroxydecanoyl-[acyl: LImGLADGEVLVDGR      |                     |
| P0A6Q3 | FABA_ECOLI  | 3-hydroxydecanoyl-[acyl: LIMGLADGEVLVDGR      |                     |
| P0A6Q3 | FABA_ECOLI  | 3-hydroxydecanoyl-[acyl: VGLFQDTSAF           |                     |
| P0A953 | FABB_ECOLI  | 3-oxoacyl-[acyl-carrier-pi FQVFGADAmR         |                     |
| P0A953 | FABB_ECOLI  | 3-oxoacyl-[acyl-carrier-pi FQVFGADAMR         |                     |
| P0A953 | FABB_ECOLI  | 3-oxoacyl-[acyl-carrier-pi SGITFSQELK         |                     |
| P0AAI9 | FABD_ECOLI  | Malonyl CoA-acyl carrier ACEEAAEGQVVSPVNFN    |                     |
| P0AAI9 | FABD_ECOLI  | Malonyl CoA-acyl carrier QLYNPVQWTK           |                     |
| P0AAI9 | FABD_ECOLI  | Malonyl CoA-acyl carrier TWQTQPALLTASVALYR    |                     |
| P0AAI5 | FABF_ECOLI  | 3-oxoacyl-[acyl-carrier-pi ASTPLGVGGFGAAR     |                     |
| P0AAI5 | FABF_ECOLI  | 3-oxoacyl-[acyl-carrier-pi IAYGDADVmVAGGAE    |                     |
| P0AEK2 | FABG_ECOLI  | 3-oxoacyl-[acyl-carrier-pi AEFGEVDILVNNAGITR  |                     |
| P0AEK2 | FABG_ECOLI  | 3-oxoacyl-[acyl-carrier-pi GITVNVVAPGFIEDMTI  |                     |
| P0AEK2 | FABG_ECOLI  | 3-oxoacyl-[acyl-carrier-pi GLmLNVTDPASIESVLE  |                     |
| P0AEK2 | FABG_ECOLI  | 3-oxoacyl-[acyl-carrier-pi GLMLNVTDPASIESVLEK |                     |
| P0A6R0 | FABH_ECOLI  | 3-oxoacyl-[acyl-carrier-pi IIGTGSYLPEQVR      |                     |
| P04128 | FIMA1_ECOLI | Type-1 fimbrial protein, / AAVAFGLTAIDAGHTNV  |                     |
| P04128 | FIMA1_ECOLI | Type-1 fimbrial protein, / YFATGAATPGAANADA1  |                     |
| P08189 | FIMF_ECOLI  | Protein fimF                                  | ILLSPCGNAVSAVK      |
| P08189 | FIMF_ECOLI  | Protein fimF                                  | QFNNIGATTPVVPFR     |
| P08191 | FIMH_ECOLI  | Protein fimH                                  | AGSLIAVLILR         |
| P08191 | FIMH_ECOLI  | Protein fimH                                  | GSAYGGVLSNFSGTVK    |
| P08191 | FIMH_ECOLI  | Protein fimH                                  | YSGSSYPFPTTSETPR    |
| P0A6R3 | FIS_ECOLI   | DNA-binding protein fis                       | AALMMGINR           |
| P0A6R3 | FIS_ECOLI   | DNA-binding protein fis                       | VNSDVLTVSTVNSQDQV   |
| P45523 | FKBA_ECOLI  | FKBP-type peptidyl-proly                      | LDGVIPGWTEGLK       |
| P45523 | FKBA_ECOLI  | FKBP-type peptidyl-proly                      | LSDQEIEQTLQAFEAR    |
| P45523 | FKBA_ECOLI  | FKBP-type peptidyl-proly                      | SAYALGASLGR         |
| P0A9L3 | FKBB_ECOLI  | FKBP-type 22 kDa peptid                       | EGVNSTESGLQFR       |
| P0A9L3 | FKBB_ECOLI  | FKBP-type 22 kDa peptid                       | LIDGTVFDSSVAR       |
| P0A9L3 | FKBB_ECOLI  | FKBP-type 22 kDa peptid                       | WELTIPQELAYGER      |
| P61949 | FLAV_ECOLI  | Flavodoxin-1                                  | AITGIFFGSDTGNTENIAI |
| P61949 | FLAV_ECOLI  | Flavodoxin-1                                  | GATIVGHWPTAGYHFE/   |
| P61949 | FLAV_ECOLI  | Flavodoxin-1                                  | GLADDDHFVGLAIDEDR   |
| P61949 | FLAV_ECOLI  | Flavodoxin-1                                  | QISEELHLDEILNA      |

|        |            |                                              |
|--------|------------|----------------------------------------------|
| P23882 | FMT_ECOLI  | Methionyl-tRNA formyl transferase            |
| POAC16 | FOLB_ECOLI | Dihydroneopterin aldolase                    |
| POAEN1 | FRE_ECOLI  | NAD(P)H-flavin reductase                     |
| POAEN1 | FRE_ECOLI  | NAD(P)H-flavin reductase                     |
| POAAP3 | FRMR_ECOLI | Transcriptional repressor                    |
| POAAP3 | FRMR_ECOLI | Transcriptional repressor                    |
| POA998 | FTNA_ECOLI | Ferritin-1                                   |
| POA9A6 | FTSZ_ECOLI | Cell division protein ftsZ                   |
| POAC33 | FUMA_ECOLI | Fumarate hydratase class I                   |
| P14407 | FUMB_ECOLI | Fumarate hydratase class I                   |
| POAC33 | FUMB_ECOLI | Fumarate hydratase class I                   |
| POAC33 | FUMB_ECOLI | Fumarate hydratase class I                   |
| POAC33 | FUMB_ECOLI | Fumarate hydratase class I                   |
| P14407 | FUMB_ECOLI | Fumarate hydratase class I                   |
| P14407 | FUMB_ECOLI | Fumarate hydratase class I                   |
| POA9B2 | G3P1_ECOLI | Glyceraldehyde-3-phosphate dehydrogenase     |
| POA6T1 | G6P1_ECOLI | Glucose-6-phosphate isomerase                |
| POAEP3 | GALU_ECOLI | UTP--glucose-1-phosphate uridylyltransferase |
| P0C8J8 | GATZ_ECOLI | D-tagatose-1,6-bisphosphate aldolase         |
| P75913 | GHRA_ECOLI | Glyoxylate/hydroxypyruvate synthase          |
| P75913 | GHRA_ECOLI | Glyoxylate/hydroxypyruvate synthase          |
| POA9S5 | GLDA_ECOLI | Glycerol dehydrogenase                       |

|        |             |                          |                     |
|--------|-------------|--------------------------|---------------------|
| P0A9S5 | GLDA_ECOLI  | Glycerol dehydrogenase   | FVLGFAQSTVEK        |
| P0A9S5 | GLDA_ECOLI  | Glycerol dehydrogenase   | GIAETAQCAGAILGIGGGK |
| P0A9S5 | GLDA_ECOLI  | Glycerol dehydrogenase   | LGEYLKPLAER         |
| P0A9S5 | GLDA_ECOLI  | Glycerol dehydrogenase   | LLAAGIGDALATWFEAR   |
| P0A9S5 | GLDA_ECOLI  | Glycerol dehydrogenase   | SFKDAGLVVEIAPFGGEC  |
| P0A9S5 | GLDA_ECOLI  | Glycerol dehydrogenase   | WLVVGDKFLVLFQAQST   |
| P0A9S5 | GLDA_ECOLI  | Glycerol dehydrogenase   | YIQGADVNR           |
| P0A9S5 | GLDA_ECOLI  | Glycerol dehydrogenase   | YLLLNNPNPmVIVDTK    |
| P0A9S5 | GLDA_ECOLI  | Glycerol dehydrogenase   | YLLLNNPNMIVIVDTK    |
| P0A6V8 | GLK_ECOLI   | Glucokinase              | LALCDIASGEISQAK     |
| P0A6V8 | GLK_ECOLI   | Glucokinase              | VLSGPGLVNLRY        |
| P17169 | GLMS_ECOLI  | Glucosamine--fructose-6  | DVAEILLEGLR         |
| P0A9C5 | GLNA_ECOLI  | Glutamine synthetase     | AGGVFTDEAIDAYIALR   |
| P0A9C5 | GLNA_ECOLI  | Glutamine synthetase     | AGGVFTDEAIDAYIALRR  |
| P0A9C5 | GLNA_ECOLI  | Glutamine synthetase     | AINALANPTTNSYK      |
| P0A9C5 | GLNA_ECOLI  | Glutamine synthetase     | CDILEPGTLQGYDRDPR   |
| P0A9C5 | GLNA_ECOLI  | Glutamine synthetase     | FGSSISGSHVAIDDIEGA\ |
| P0A9C5 | GLNA_ECOLI  | Glutamine synthetase     | GGYFPVPPVDSAQDIR    |
| P0A9C5 | GLNA_ECOLI  | Glutamine synthetase     | LVPGYEAPVmLAYSAR    |
| P0A9C5 | GLNA_ECOLI  | Glutamine synthetase     | LVPGYEAPVMLAYSAR    |
| P0A9C5 | GLNA_ECOLI  | Glutamine synthetase     | mFDGSSIGGWK         |
| P0A9C5 | GLNA_ECOLI  | Glutamine synthetase     | mTPHPVEFELYYSV      |
| P0A9C5 | GLNA_ECOLI  | Glutamine synthetase     | MFDGSSIGGWK         |
| P0A9C5 | GLNA_ECOLI  | Glutamine synthetase     | SAEHVLTmLNEHEVK     |
| P0A9C5 | GLNA_ECOLI  | Glutamine synthetase     | SAEHVLTMLNEHEVK     |
| P0A9C5 | GLNA_ECOLI  | Glutamine synthetase     | YAGLSEQALYYIGGVK    |
| P0AEQ3 | GLNH_ECOLI  | Glutamine-binding perip  | ADAVLHDTPNILYFIK    |
| P0AEQ3 | GLNH_ECOLI  | Glutamine-binding perip  | AVGDSLEAQQYGIAFPK   |
| P13035 | GLPD_ECOLI  | Aerobic glycerol-3-phosp | GLVNATGPWVK         |
| P13035 | GLPD_ECOLI  | Aerobic glycerol-3-phosp | LVLANAQMVVR         |
| P13035 | GLPD_ECOLI  | Aerobic glycerol-3-phosp | VSQWLVEYTQQR        |
| P0AC59 | GLRX2_ECOLI | Glutaredoxin-2           | NLTLVAGINWPSR       |
| P0AC59 | GLRX2_ECOLI | Glutaredoxin-2           | SAFDEFSTPAAR        |
| P0AC69 | GLRX4_ECOLI | Glutaredoxin-4           | FAYVDILQNPDIR       |
| P0AC69 | GLRX4_ECOLI | Glutaredoxin-4           | QIAENPILLYMK        |
| P0A825 | GLYA_ECOLI  | Serine hydroxymethyltra  | AmVEVFLEK           |
| P63224 | GMHA_ECOLI  | Phosphoheptose isomer:   | AAVLLADSFK          |
| P63224 | GMHA_ECOLI  | Phosphoheptose isomer:   | EGDVLLGISTSGNSANVI  |
| P62707 | GPMA_ECOLI  | 2,3-bisphosphoglycerate  | ELPLTESLALTIDR      |
| P62707 | GPMA_ECOLI  | 2,3-bisphosphoglycerate  | FTGWYDVDLSEK        |
| P62707 | GPMA_ECOLI  | 2,3-bisphosphoglycerate  | FTGWYDVDLSEKGVSEA   |
| P62707 | GPMA_ECOLI  | 2,3-bisphosphoglycerate  | GFAVTPPELTK         |
| P62707 | GPMA_ECOLI  | 2,3-bisphosphoglycerate  | LSEKELPLTESLALTIDR  |
| P62707 | GPMA_ECOLI  | 2,3-bisphosphoglycerate  | VIPYWNETILPR        |
| P62707 | GPMA_ECOLI  | 2,3-bisphosphoglycerate  | YYLGNADIEIAAK       |
| P37689 | GPMI_ECOLI  | 2,3-bisphosphoglycerate  | AFFANPVLTGAVDK      |
| P37689 | GPMI_ECOLI  | 2,3-bisphosphoglycerate  | AFVNADFDGDFAR       |
| P37689 | GPMI_ECOLI  | 2,3-bisphosphoglycerate  | IYLHAFLDGR          |

|        |            |                                                 |                    |
|--------|------------|-------------------------------------------------|--------------------|
| P37689 | GPMI_ECOLI | 2,3-bisphosphoglycerate VATYDLQPE               | MSSAELTE           |
| P37689 | GPMI_ECOLI | 2,3-bisphosphoglycerate VATYDLQPE               | MSSAELTEI          |
| P68066 | GRCA_ECOLI | Autonomous glycylic acid AANDDLLNSFWLLDSEK      |                    |
| P68066 | GRCA_ECOLI | Autonomous glycylic acid AGYAEDEVVAVSK          |                    |
| P68066 | GRCA_ECOLI | Autonomous glycylic acid EVPVEVKPEVR            |                    |
| P68066 | GRCA_ECOLI | Autonomous glycylic acid LGDIEYR                |                    |
| P68066 | GRCA_ECOLI | Autonomous glycylic acid LGDIEYREVPVEVKPEVR     |                    |
| P68066 | GRCA_ECOLI | Autonomous glycylic acid VEGGQHLNVNVL           |                    |
| P09372 | GRPE_ECOLI | Protein grpE                                    | ALEVADKANPD        |
| P09372 | GRPE_ECOLI | Protein grpE                                    | ANPD               |
| P09372 | GRPE_ECOLI | Protein grpE                                    | DEKVANLEAQLAEAQTR  |
| P09372 | GRPE_ECOLI | Protein grpE                                    | FINELLPVIDSLDR     |
| P09372 | GRPE_ECOLI | Protein grpE                                    | VANLEAQLAEAQTR     |
| P23893 | GSA_ECOLI  | Glutamate-1-semialdehyd AFTGVGGTPLFIEK          |                    |
| P23893 | GSA_ECOLI  | Glutamate-1-semialdehyd ELIPGGVNSPVR            |                    |
| P23893 | GSA_ECOLI  | Glutamate-1-semialdehyd GLSFGAPTE               | EVK                |
| P23893 | GSA_ECOLI  | Glutamate-1-semialdehyd IIGGG                   | PVGAFGGR           |
| P23893 | GSA_ECOLI  | Glutamate-1-semialdehyd IIGGGMPVGAFGGR          |                    |
| P23893 | GSA_ECOLI  | Glutamate-1-semialdehyd YTLTCTYNDLASVR          |                    |
| P0A6W9 | GSH1_ECOLI | Glutamate--cysteine ligase VNADGTLATTGHPEALG    |                    |
| P06715 | GSHR_ECOLI | Glutathione reductase                           | FNWETLIASR         |
| P0A9D2 | GST_ECOLI  | Glutathione S-transferase                       | maERPEVQDALSAEG    |
| P0A9D2 | GST_ECOLI  | Glutathione S-transferase                       | QLLAPVNSISR        |
| P33012 | GYRI_ECOLI | DNA gyrase inhibitory protein EWVAVYYDNPDETPAEI |                    |
| P33012 | GYRI_ECOLI | DNA gyrase inhibitory protein TVAGFHLVGPWEQTVK  |                    |
| P31658 | HCHA_ECOLI | Chaperone protein hchA                          | ILVIAADER          |
| P31658 | HCHA_ECOLI | Chaperone protein hchA                          | KLLTGDSPFAANALGK   |
| P31658 | HCHA_ECOLI | Chaperone protein hchA                          | LLTGDSPFAANALGK    |
| P31658 | HCHA_ECOLI | Chaperone protein hchA                          | mGmNIINDDITGR      |
| P31658 | HCHA_ECOLI | Chaperone protein hchA                          | mGMNIINDDITGR      |
| P31658 | HCHA_ECOLI | Chaperone protein hchA                          | MGMNIINDDITGR      |
| P0A6X3 | HFQ_ECOLI  | Protein hfq                                     | AKGQSLQDPFLNALR    |
| P0A6X3 | HFQ_ECOLI  | Protein hfq                                     | ERVPSIYLVNGIK      |
| P0A6X3 | HFQ_ECOLI  | Protein hfq                                     | GQSLQDPFLNALR      |
| P0A6X3 | HFQ_ECOLI  | Protein hfq                                     | LQQQIESFDQFVILLK   |
| P0A6X3 | HFQ_ECOLI  | Protein hfq                                     | VPVSIYLVNGIK       |
| P67910 | HLDD_ECOLI | ADP-L-glycero-D-manno- <                        | QILPEANSQIVGFR     |
| P67910 | HLDD_ECOLI | ADP-L-glycero-D-manno-                          | AESFQAVADATLAYHK   |
| P67910 | HLDD_ECOLI | ADP-L-glycero-D-manno-                          | AESFQAVADATLAYHKK  |
| P67910 | HLDD_ECOLI | ADP-L-glycero-D-manno-                          | ALNDKGITDILVVDNLK  |
| P67910 | HLDD_ECOLI | ADP-L-glycero-D-manno-                          | ALNDKGITDILVVDNLKC |
| P67910 | HLDD_ECOLI | ADP-L-glycero-D-manno-                          | EIPFLYASSAATYGGR   |
| P67910 | HLDD_ECOLI | ADP-L-glycero-D-manno-                          | ELLHYCLER          |
| P67910 | HLDD_ECOLI | ADP-L-glycero-D-manno-                          | EYEKPLNVYGYSK      |
| P67910 | HLDD_ECOLI | ADP-L-glycero-D-manno-                          | FLFDEYVR           |
| P67910 | HLDD_ECOLI | ADP-L-glycero-D-manno-                          | GITDILVVDNLK       |
| P67910 | HLDD_ECOLI | ADP-L-glycero-D-manno-                          | GITDILVVDNLKDGTK   |
| P67910 | HLDD_ECOLI | ADP-L-glycero-D-manno-                          | GQIEYIPFPDK        |



|        |            |                                                                  |
|--------|------------|------------------------------------------------------------------|
| P67910 | HLDD_ECOLI | ADP-L-glycero-D-manno- GQIEYIPFPDKLK                             |
| P67910 | HLDD_ECOLI | ADP-L-glycero-D-manno- GRYQAFTQADLTNLR                           |
| P67910 | HLDD_ECOLI | ADP-L-glycero-D-manno- GS <sup>m</sup> ASVAFHLNTQLNI             |
| P67910 | HLDD_ECOLI | ADP-L-glycero-D-manno- GSMASVAFHLNTQLNNI                         |
| P67910 | HLDD_ECOLI | ADP-L-glycero-D-manno- KGQIEYIPFPDK                              |
| P67910 | HLDD_ECOLI | ADP-L-glycero-D-manno- KGQIEYIPFPDKLK                            |
| P67910 | HLDD_ECOLI | ADP-L-glycero-D-manno- LFESENFK                                  |
| P67910 | HLDD_ECOLI | ADP-L-glycero-D-manno- LFESENFKR                                 |
| P67910 | HLDD_ECOLI | ADP-L-glycero-D-manno- <sup>m</sup> IIIVTGGAGFIGSNIVK            |
| P67910 | HLDD_ECOLI | ADP-L-glycero-D-manno- MIIIVTGGAGFIGSNIVK                        |
| P67910 | HLDD_ECOLI | ADP-L-glycero-D-manno- QILPEANSQIVGFR                            |
| P67910 | HLDD_ECOLI | ADP-L-glycero-D-manno- TSDFIERS                                  |
| P67910 | HLDD_ECOLI | ADP-L-glycero-D-manno- TVAEGVTEY <sup>m</sup> AWLNR              |
| P67910 | HLDD_ECOLI | ADP-L-glycero-D-manno- TVAEGVTEY <sup>m</sup> AWLNR <sup>I</sup> |
| P67910 | HLDD_ECOLI | ADP-L-glycero-D-manno- TVAEGVTEYMAWLNR                           |
| P67910 | HLDD_ECOLI | ADP-L-glycero-D-manno- TVAEGVTEYMAWLNRD                          |
| P67910 | HLDD_ECOLI | ADP-L-glycero-D-manno- YFNVYGPR                                  |
| P67910 | HLDD_ECOLI | ADP-L-glycero-D-manno- YQAFTQADLTNLR                             |
| P43329 | HRPA_ECOLI | ATP-dependent RNA heli ELVIALIK                                  |
| P43329 | HRPA_ECOLI | ATP-dependent RNA heli IIITSATIDPER                              |
| P43329 | HRPA_ECOLI | ATP-dependent RNA heli LLLLNI <sup>SP</sup> IK                   |
| P43329 | HRPA_ECOLI | ATP-dependent RNA heli LPIEPISQASANQR                            |
| P43329 | HRPA_ECOLI | ATP-dependent RNA heli LTFTALQQR                                 |
| P0A6Y5 | HSLO_ECOLI | 33 kDa chaperonin LYHEEEVTVYDPQDVEFI                             |
| P0A6Y5 | HSLO_ECOLI | 33 kDa chaperonin YLFENFAVR                                      |
| P0A6Z3 | HTPG_ECOLI | Chaperone protein htpG ALSNPDLYEGDGELR                           |
| P0A6Z3 | HTPG_ECOLI | Chaperone protein htpG ALSNPDLYEGDGELRVR                         |
| P0A6Z3 | HTPG_ECOLI | Chaperone protein htpG EGPAEDFANQEAIK                            |
| P0A6Z3 | HTPG_ECOLI | Chaperone protein htpG FASTHTDSSAQTVSLEDY                        |
| P0A6Z3 | HTPG_ECOLI | Chaperone protein htpG GTLEDPNLFIR                               |
| P0A6Z3 | HTPG_ECOLI | Chaperone protein htpG IYYITADSYAAAK                             |
| P0A6Z3 | HTPG_ECOLI | Chaperone protein htpG VDESLEKLADEVDESAKE                        |
| P0A6Z3 | HTPG_ECOLI | Chaperone protein htpG YSDHIALPVEIEK                             |
| P0A6Z3 | HTPG_ECOLI | Chaperone protein htpG YSDHIALPVEIEKR                            |
| P08200 | IDH_ECOLI  | Isocitrate dehydrogenase EEFGGELIDGGPWLK                         |
| P08200 | IDH_ECOLI  | Isocitrate dehydrogenase VAIKGPLTTPVGGGIR                        |
| P0A707 | IF3_ECOLI  | Translation initiation fact <sup>&lt;</sup> QMIMVLAPK            |
| P0A707 | IF3_ECOLI  | Translation initiation fact AEEAGVDLVEISPNAEPF                   |
| P0A707 | IF3_ECOLI  | Translation initiation fact EALEKAEAGVDLVEISPI                   |
| P0A707 | IF3_ECOLI  | Translation initiation fact FRPGTDEGDYQVK                        |
| P0A707 | IF3_ECOLI  | Translation initiation fact LTGLEGEQLGIVSLR                      |
| P0A707 | IF3_ECOLI  | Translation initiation fact Q <sup>m</sup> IMVLAPK               |
| P0A707 | IF3_ECOLI  | Translation initiation fact QMI <sup>m</sup> VLAPK               |
| P0A707 | IF3_ECOLI  | Translation initiation fact QMIMVLAPK                            |
| P0A707 | IF3_ECOLI  | Translation initiation fact VKDDLQELAVVESFPTK                    |
| P0A707 | IF3_ECOLI  | Translation initiation fact VKDDLQELAVVESFPTKI                   |
| P0A6X7 | IHFA_ECOLI | Integration host factor st AE <sup>m</sup> SEYLFDK               |
| P0A6X7 | IHFA_ECOLI | Integration host factor st AE <sup>m</sup> SEYLFDKLGLSK          |

|        |             |                                              |
|--------|-------------|----------------------------------------------|
| POA6X7 | IHFA_ECOLI  | Integration host factor st AEMSEYLFDK        |
| POA6X7 | IHFA_ECOLI  | Integration host factor st AEMSEYLFDKLGLSK   |
| POA6X7 | IHFA_ECOLI  | Integration host factor st ELVELFFEEIR       |
| POA6X7 | IHFA_ECOLI  | Integration host factor st ELVELFFEEIRR      |
| POA6X7 | IHFA_ECOLI  | Integration host factor st LSGFGNFDLR        |
| POA6X7 | IHFA_ECOLI  | Integration host factor st TGEDIPITAR        |
| POA6Y1 | IHFB_ECOLI  | Integration host factor st GFGSFSLHYR        |
| POA6Y1 | IHFB_ECOLI  | Integration host factor st TVEDAVKEmLEHmAST  |
| POA7A9 | IPYR_ECOLI  | Inorganic pyrophosphatase AEIVASFER          |
| POA7A9 | IPYR_ECOLI  | Inorganic pyrophosphatase EYDHIKDVNDLPELLK   |
| POA7A9 | IPYR_ECOLI  | Inorganic pyrophosphatase VEGWENAEAAKAEIVAS  |
| POAAC8 | ISCA_ECOLI  | Iron-binding protein iscA FTNPNVKDECGCGESFH  |
| POAAC8 | ISCA_ECOLI  | Iron-binding protein iscA SLQFLDGTQLDFVK     |
| POA6B7 | ISCS_ECOLI  | Cysteine desulfurase ALGLNDELAHSSIR          |
| POA6B7 | ISCS_ECOLI  | Cysteine desulfurase EGFEVTYLAPQR            |
| POA6B7 | ISCS_ECOLI  | Cysteine desulfurase EIVFTSGATESDNLAIK       |
| POA6B7 | ISCS_ECOLI  | Cysteine desulfurase FGWQAEAEAVDIAR          |
| POA6B7 | ISCS_ECOLI  | Cysteine desulfurase NQIADLVGADPR            |
| POA6B7 | ISCS_ECOLI  | Cysteine desulfurase SGTLPVHQIVGmGEAYI       |
| Q46893 | ISPD_ECOLI  | 2-C-methyl-D-erythritol 4 VTRPEDLALAEFYLTR   |
| P69441 | KAD_ECOLI   | Adenylate kinase IILLGAPGAGK                 |
| P69441 | KAD_ECOLI   | Adenylate kinase LVTDELVIALVK                |
| P69441 | KAD_ECOLI   | Adenylate kinase YGIPQISTGDMLR               |
| P04951 | KDSB_ECOLI  | 3-deoxy-manno-octulosylc IHVAVAQEVPGTGVDTP   |
| P04951 | KDSB_ECOLI  | 3-deoxy-manno-octulosylc SFVVIIPAR           |
| P0ABZ4 | KDSC_ECOLI  | 3-deoxy-D-manno-octulosylc LIAFSDLLEK        |
| P0ABZ4 | KDSC_ECOLI  | 3-deoxy-D-manno-octulosylc VGLSVAVADAHPLLIPR |
| P60546 | KGUA_ECOLI  | Guanylate kinase SSLIQALLK                   |
| P0AD61 | KPYK1_ECOLI | Pyruvate kinase I EITSTDDFYR                 |
| P0AD61 | KPYK1_ECOLI | Pyruvate kinase I GAVETAEKLDAPLIVVAT         |
| P0AD61 | KPYK1_ECOLI | Pyruvate kinase I GDLGVEIPVEEVIFAQK          |
| P0AD61 | KPYK1_ECOLI | Pyruvate kinase I TAAILLDTKGPEIR             |
| P21599 | KPYK2_ECOLI | Pyruvate kinase II ISSGLPIFmSR               |
| P21599 | KPYK2_ECOLI | Pyruvate kinase II TLNLTALYR                 |
| P60716 | LIPA_ECOLI  | Lipoyl synthase ALDILTATPPDVFNHNLE           |
| P60716 | LIPA_ECOLI  | Lipoyl synthase DGGAQHFADCITAIR              |
| P60716 | LIPA_ECOLI  | Lipoyl synthase IETLVPDFR                    |
| P21645 | LPXD_ECOLI  | UDP-3-O-[3-hydroxymyri NPYLTYAR              |
| P21645 | LPXD_ECOLI  | UDP-3-O-[3-hydroxymyri VIIGDRVEIGACTTIDR     |
| P45578 | LUXS_ECOLI  | S-ribosylhomocysteine ly PLLDSFTVDHTR        |
| P45578 | LUXS_ECOLI  | S-ribosylhomocysteine ly TmNTPHGDAITVFDLF    |
| POAEX9 | MALE_ECOLI  | Maltose-binding periplas AGLTFLVDLIK         |
| POAEX9 | MALE_ECOLI  | Maltose-binding periplas FGGYAQSGLLAEITPDK   |
| POAEX9 | MALE_ECOLI  | Maltose-binding periplas LYPFTWDAVR          |
| POAEX9 | MALE_ECOLI  | Maltose-binding periplas TWEEIPALDKELK       |
| POAEX9 | MALE_ECOLI  | Maltose-binding periplas VNYGVTVLPTFK        |
| P15977 | MALQ_ECOLI  | 4-alpha-glucanotransferase GYWECGDLTLGK      |
| P00946 | MANA_ECOLI  | Mannose-6-phosphate is FGELPFLFK             |

|        |            |                             |                     |
|--------|------------|-----------------------------|---------------------|
| P00946 | MANA_ECOLI | Mannose-6-phosphate is      | LINSVQNYAWGSK       |
| P00946 | MANA_ECOLI | Mannose-6-phosphate is      | SALDSQQGEPWQTIR     |
| P00946 | MANA_ECOLI | Mannose-6-phosphate is      | YIDIPELVANVK        |
| P08997 | MASY_ECOLI | Malate synthase A           | DAVNGTISYTNEAGK     |
| P08997 | MASY_ECOLI | Malate synthase A           | EQDAPITADQLLAPCDG   |
| P08997 | MASY_ECOLI | Malate synthase A           | GSGPYFYLPK          |
| P08997 | MASY_ECOLI | Malate synthase A           | IYQLKPNPAVLICR      |
| P08997 | MASY_ECOLI | Malate synthase A           | LmEQITTSDELIDFLTF   |
| P08997 | MASY_ECOLI | Malate synthase A           | QAVTmDKPFLNAYS      |
| P08997 | MASY_ECOLI | Malate synthase A           | QAVTMDKPFLNAYS      |
| P08997 | MASY_ECOLI | Malate synthase A           | QmLGEEmkVIASELGE    |
| P08997 | MASY_ECOLI | Malate synthase A           | RVEITGPVER          |
| P08997 | MASY_ECOLI | Malate synthase A           | TEQATTTDELAFTRPYGE  |
| P08997 | MASY_ECOLI | Malate synthase A           | VFmADFEDSLAPDWN     |
| P08997 | MASY_ECOLI | Malate synthase A           | VFMADFEDSLAPDWNK    |
| P08997 | MASY_ECOLI | Malate synthase A           | VIASELGEER          |
| P08997 | MASY_ECOLI | Malate synthase A           | VIDGQINLR           |
| POACD8 | MBHL_ECOLI | Hydrogenase-1 large cha     | LNLVQSIIR           |
| POACD8 | MBHL_ECOLI | Hydrogenase-1 large cha     | mAIPEQPLEILR        |
| POAEY5 | MDAB_ECOLI | Modulator of drug activi    | YIDDFTEGHGTLYASDC   |
| P61889 | MDH_ECOLI  | Malate dehydrogenase        | ACIGIITNPVNTTVAIAAE |
| P61889 | MDH_ECOLI  | Malate dehydrogenase        | ALQGEQGVVECAYPEGI   |
| P61889 | MDH_ECOLI  | Malate dehydrogenase        | DIALGEEFVNK         |
| P61889 | MDH_ECOLI  | Malate dehydrogenase        | FFSQPLLLGK          |
| P61889 | MDH_ECOLI  | Malate dehydrogenase        | GFSGEDATPALEGADV    |
| P61889 | MDH_ECOLI  | Malate dehydrogenase        | LFGVTTLDIIR         |
| P61889 | MDH_ECOLI  | Malate dehydrogenase        | SDLFNVNAGIVK        |
| POA817 | METK_ECOLI | S-adenosylmethionine sy     | FFINPTGR            |
| POA817 | METK_ECOLI | S-adenosylmethionine sy     | VPSEQLTLLVR         |
| POAEI1 | MIAB_ECOLI | (Dimethylallyl)adenosine    | WKLLKEK             |
| POAEZ3 | MIND_ECOLI | Septum site-determining     | IKLVGVIPEDQSVLR     |
| POAEZ3 | MIND_ECOLI | Septum site-determining     | LVGVIPEDQSVLR       |
| POAEZ3 | MIND_ECOLI | Septum site-determining     | TENLYILPASQTR       |
| POA734 | MINE_ECOLI | Cell division topological s | ALLDFFLSR           |
| POA734 | MINE_ECOLI | Cell division topological s | KNTANIAK            |
| POAEZ9 | MOAB_ECOLI | Molybdenum cofactor bi      | SQVSTEFIPTR         |
| POAEZ9 | MOAB_ECOLI | Molybdenum cofactor bi      | TAWENIAPQLDAR       |
| POAEZ9 | MOAB_ECOLI | Molybdenum cofactor bi      | TLIFAmPGSTK         |
| P12281 | MOEA_ECOLI | Molybdopterin molybdei      | LADIASGQPLPVAGK     |
| P37773 | MPL_ECOLI  | UDP-N-acetylmuramate:       | IIAVLEPR            |
| P37773 | MPL_ECOLI  | UDP-N-acetylmuramate:       | IIWPENDINLK         |
| POACR9 | MPRA_ECOLI | Transcriptional repressor   | HEDFPYQEILLTR       |
| POACR9 | MPRA_ECOLI | Transcriptional repressor   | mDSSFTPIEQmLK       |
| POA9X4 | MREB_ECOLI | Rod shape-determining r     | VLVCVPVGATQVER      |
| POA744 | MSRA_ECOLI | Peptide methionine sulfc    | HLVSPADALPGR        |
| POA744 | MSRA_ECOLI | Peptide methionine sulfc    | SAIYPLTPEQDAAAR     |
| P18843 | NADE_ECOLI | NH(3)-dependent NAD(+)      | SLVLGISGGQDSTLAGK   |
| P18843 | NADE_ECOLI | NH(3)-dependent NAD(+)      | YGDGGTDINPLYR       |

|        |            |                                             |
|--------|------------|---------------------------------------------|
| P38489 | NFNB_ECOLI | Oxygen-insensitive NAD( SRLPQNITLTEV        |
| P63020 | NFUA_ECOLI | Fe/S biogenesis protein r LLANQEEGTQIR      |
| P63020 | NFUA_ECOLI | Fe/S biogenesis protein r QLLNEFPELK        |
| P63020 | NFUA_ECOLI | Fe/S biogenesis protein r VEYmLQSQINPQLAGH  |
| P63020 | NFUA_ECOLI | Fe/S biogenesis protein r VEYMLQSQINPQLAGHC |
| POAF63 | NSRR_ECOLI | HTH-type transcriptional mTSISEVTDVYGVSR    |
| POAFF6 | NUSA_ECOLI | Transcription elongation IEVPEIGEEVIEIK     |
| POA780 | NUSB_ECOLI | N utilization substance p VAINEAIELAK       |
| POAFG8 | ODP1_ECOLI | Pyruvate dehydrogenase Ac-SERFPNDVDPIETR    |
| POAFG8 | ODP1_ECOLI | Pyruvate dehydrogenase <QIGIYSPNGQQYTPQ     |
| POAFG8 | ODP1_ECOLI | Pyruvate dehydrogenase <QTVYAFLGDGEMDE      |
| POAFG8 | ODP1_ECOLI | Pyruvate dehydrogenase ALNVmLK              |
| POAFG8 | ODP1_ECOLI | Pyruvate dehydrogenase ALNVMLK              |
| POAFG8 | ODP1_ECOLI | Pyruvate dehydrogenase AQYLIDQLLAEAR        |
| POAFG8 | ODP1_ECOLI | Pyruvate dehydrogenase AQYLIDQLLAEAR        |
| POAFG8 | ODP1_ECOLI | Pyruvate dehydrogenase ARNEQDGGDLVYFQGH     |
| POAFG8 | ODP1_ECOLI | Pyruvate dehydrogenase ATVILAHTIK           |
| POAFG8 | ODP1_ECOLI | Pyruvate dehydrogenase DLELGGHmASFQSSAT     |
| POAFG8 | ODP1_ECOLI | Pyruvate dehydrogenase DRFNVPVSDADIEK       |
| POAFG8 | ODP1_ECOLI | Pyruvate dehydrogenase DRFNVPVSDADIEKLPYI   |
| POAFG8 | ODP1_ECOLI | Pyruvate dehydrogenase DRLVPIIADEAR         |
| POAFG8 | ODP1_ECOLI | Pyruvate dehydrogenase DWLQAIESVIR          |
| POAFG8 | ODP1_ECOLI | Pyruvate dehydrogenase DWLQAIESVIREEGVER    |
| POAFG8 | ODP1_ECOLI | Pyruvate dehydrogenase DYGVGSDVYSVTSFTELA   |
| POAFG8 | ODP1_ECOLI | Pyruvate dehydrogenase EAAEILAK             |
| POAFG8 | ODP1_ECOLI | Pyruvate dehydrogenase EHFFGKYPETAALVADW    |
| POAFG8 | ODP1_ECOLI | Pyruvate dehydrogenase EISTTIAFVR           |
| POAFG8 | ODP1_ECOLI | Pyruvate dehydrogenase EKLDNLVFINCNLQR      |
| POAFG8 | ODP1_ECOLI | Pyruvate dehydrogenase EQVAYYK              |
| POAFG8 | ODP1_ECOLI | Pyruvate dehydrogenase EQVAYYKEDEK          |
| POAFG8 | ODP1_ECOLI | Pyruvate dehydrogenase FNIDADKVNPR          |
| POAFG8 | ODP1_ECOLI | Pyruvate dehydrogenase FNVPVSDADIEK         |
| POAFG8 | ODP1_ECOLI | Pyruvate dehydrogenase FNVPVSDADIEKLPYITFF  |
| POAFG8 | ODP1_ECOLI | Pyruvate dehydrogenase FPNDVDPIETR          |
| POAFG8 | ODP1_ECOLI | Pyruvate dehydrogenase GAITIATR             |
| POAFG8 | ODP1_ECOLI | Pyruvate dehydrogenase GFLIGGTSGR           |
| POAFG8 | ODP1_ECOLI | Pyruvate dehydrogenase GGVNVAAGTGISNYINT    |
| POAFG8 | ODP1_ECOLI | Pyruvate dehydrogenase GIYKLETIEGSK         |
| POAFG8 | ODP1_ECOLI | Pyruvate dehydrogenase GKATVILAHTIK         |
| POAFG8 | ODP1_ECOLI | Pyruvate dehydrogenase GKVQLLGSILR          |
| POAFG8 | ODP1_ECOLI | Pyruvate dehydrogenase GYGMGDAAEGK          |
| POAFG8 | ODP1_ECOLI | Pyruvate dehydrogenase HHFEVDASYVVVAALGE    |
| POAFG8 | ODP1_ECOLI | Pyruvate dehydrogenase IGDLCWAAGDQQAR       |
| POAFG8 | ODP1_ECOLI | Pyruvate dehydrogenase IINELEGIFEGAGWNVIK   |
| POAFG8 | ODP1_ECOLI | Pyruvate dehydrogenase KGGVNVAAGTGISNYIN    |
| POAFG8 | ODP1_ECOLI | Pyruvate dehydrogenase KGGVNVAAGTGISNYIN    |
| POAFG8 | ODP1_ECOLI | Pyruvate dehydrogenase KGIYKLETIEGSK        |
| POAFG8 | ODP1_ECOLI | Pyruvate dehydrogenase KIYAFAK              |

|        |            |                                                |
|--------|------------|------------------------------------------------|
| POAFG8 | ODP1_ECOLI | Pyruvate dehydrogenase LDNLVFINCNLQR           |
| POAFG8 | ODP1_ECOLI | Pyruvate dehydrogenase LELPSLQDFGALLEEQSK      |
| POAFG8 | ODP1_ECOLI | Pyruvate dehydrogenase LETIEGSK                |
| POAFG8 | ODP1_ECOLI | Pyruvate dehydrogenase LFAEQVR                 |
| POAFG8 | ODP1_ECOLI | Pyruvate dehydrogenase LIQLmNETVDGDYQTF        |
| POAFG8 | ODP1_ECOLI | Pyruvate dehydrogenase LIQLMNETVDGDYQTFK       |
| POAFG8 | ODP1_ECOLI | Pyruvate dehydrogenase LmPEFWQFPTVSmGL         |
| POAFG8 | ODP1_ECOLI | Pyruvate dehydrogenase LmPEFWQFPTVSMGL         |
| POAFG8 | ODP1_ECOLI | Pyruvate dehydrogenase LMPEFWQFPTVSmGLC        |
| POAFG8 | ODP1_ECOLI | Pyruvate dehydrogenase LPYITFPEGSEEHTYLHAC     |
| POAFG8 | ODP1_ECOLI | Pyruvate dehydrogenase LTQEQLDNFR              |
| POAFG8 | ODP1_ECOLI | Pyruvate dehydrogenase LVPIIADEAR              |
| POAFG8 | ODP1_ECOLI | Pyruvate dehydrogenase NEQDGGDLVYFQGHISF       |
| POAFG8 | ODP1_ECOLI | Pyruvate dehydrogenase QENVYYYITTLNENYHm       |
| POAFG8 | ODP1_ECOLI | Pyruvate dehydrogenase QENVYYYITTLNENYHM       |
| POAFG8 | ODP1_ECOLI | Pyruvate dehydrogenase QIGIYSPNGQQYTPQDR       |
| POAFG8 | ODP1_ECOLI | Pyruvate dehydrogenase QIGIYSPNGQQYTPQDR       |
| POAFG8 | ODP1_ECOLI | Pyruvate dehydrogenase QPNFTEKLELPSLQDFG       |
| POAFG8 | ODP1_ECOLI | Pyruvate dehydrogenase QTVYAFLGDGE mDEPE       |
| POAFG8 | ODP1_ECOLI | Pyruvate dehydrogenase QTVYAFLGDGEMDEPE        |
| POAFG8 | ODP1_ECOLI | Pyruvate dehydrogenase SERFPNDVDPIETR          |
| POAFG8 | ODP1_ECOLI | Pyruvate dehydrogenase TFGmEGLFR               |
| POAFG8 | ODP1_ECOLI | Pyruvate dehydrogenase TFGMEGLFR               |
| POAFG8 | ODP1_ECOLI | Pyruvate dehydrogenase TYVPADDYR               |
| POAFG8 | ODP1_ECOLI | Pyruvate dehydrogenase VLGTDFGFR               |
| POAFG8 | ODP1_ECOLI | Pyruvate dehydrogenase VPYIAQVmNDAPAVAS        |
| POAFG8 | ODP1_ECOLI | Pyruvate dehydrogenase VPYIAQVmNDAPAVAS        |
| POAFG8 | ODP1_ECOLI | Pyruvate dehydrogenase VPYIAQVMNDAPAVAS        |
| POAFG8 | ODP1_ECOLI | Pyruvate dehydrogenase VPYIAQVMNDAPAVAS        |
| POAFG8 | ODP1_ECOLI | Pyruvate dehydrogenase VQLLGSGSILR             |
| POAFG8 | ODP1_ECOLI | Pyruvate dehydrogenase WDELLR                  |
| POAFG8 | ODP1_ECOLI | Pyruvate dehydrogenase WNAImTVLR               |
| POAFG8 | ODP1_ECOLI | Pyruvate dehydrogenase WNAIMTVLR               |
| POAFG8 | ODP1_ECOLI | Pyruvate dehydrogenase WNmLHPLETPR             |
| POAFG8 | ODP1_ECOLI | Pyruvate dehydrogenase WNMLHPLETPR             |
| POAFG8 | ODP1_ECOLI | Pyruvate dehydrogenase YPETAALVADWTDEQIV       |
| P06959 | ODP2_ECOLI | Dihydrolypoyllysine-resid <QEAAAPAAAPAPAAG     |
| P06959 | ODP2_ECOLI | Dihydrolypoyllysine-resid AEAAPAATGGGIPGmLI    |
| P06959 | ODP2_ECOLI | Dihydrolypoyllysine-resid AEAAPAATGGGIPGMLF    |
| P06959 | ODP2_ECOLI | Dihydrolypoyllysine-resid AEAPAAAPAAK          |
| P06959 | ODP2_ECOLI | Dihydrolypoyllysine-resid AEGKSEFAENDAYVHAT    |
| P06959 | ODP2_ECOLI | Dihydrolypoyllysine-resid AEGKSEFAENDAYVHAT    |
| P06959 | ODP2_ECOLI | Dihydrolypoyllysine-resid AIEIKVPDIGADEVEITEIL |
| P06959 | ODP2_ECOLI | Dihydrolypoyllysine-resid AVAAALEQmPR          |
| P06959 | ODP2_ECOLI | Dihydrolypoyllysine-resid AVAAALEQMPR          |
| P06959 | ODP2_ECOLI | Dihydrolypoyllysine-resid DVNVPDIGSDEVEVTEIL   |
| P06959 | ODP2_ECOLI | Dihydrolypoyllysine-resid EAAPAAAPAAAAAK       |



|        |            |                                              |
|--------|------------|----------------------------------------------|
| P06959 | ODP2_ECOLI | Dihydrolypoyllysine-resid EFGVNLAK           |
| P06959 | ODP2_ECOLI | Dihydrolypoyllysine-resid EVNVPDIGGDEVEVTEV  |
| P06959 | ODP2_ECOLI | Dihydrolypoyllysine-resid EVNVPDIGGDEVEVTEV  |
| P06959 | ODP2_ECOLI | Dihydrolypoyllysine-resid FGEIEEVELGR        |
| P06959 | ODP2_ECOLI | Dihydrolypoyllysine-resid FITIINNTLSDIR      |
| P06959 | ODP2_ECOLI | Dihydrolypoyllysine-resid FITIINNTLSDIRR     |
| P06959 | ODP2_ECOLI | Dihydrolypoyllysine-resid FNSLSLEDGQR        |
| P06959 | ODP2_ECOLI | Dihydrolypoyllysine-resid ILREDVQAYVK        |
| P06959 | ODP2_ECOLI | Dihydrolypoyllysine-resid ISGANLSR           |
| P06959 | ODP2_ECOLI | Dihydrolypoyllysine-resid ITPVVFImK          |
| P06959 | ODP2_ECOLI | Dihydrolypoyllysine-resid ITPVVFIMK          |
| P06959 | ODP2_ECOLI | Dihydrolypoyllysine-resid KGIEELSR           |
| P06959 | ODP2_ECOLI | Dihydrolypoyllysine-resid KLDVKITPVVFImK     |
| P06959 | ODP2_ECOLI | Dihydrolypoyllysine-resid KLDVKITPVVFIMK     |
| P06959 | ODP2_ECOLI | Dihydrolypoyllysine-resid KYINIGVAVDTPNGLVVF |
| P06959 | ODP2_ECOLI | Dihydrolypoyllysine-resid KYINIGVAVDTPNGLVVF |
| P06959 | ODP2_ECOLI | Dihydrolypoyllysine-resid LmLPISLSFDHR       |
| P06959 | ODP2_ECOLI | Dihydrolypoyllysine-resid LMLPISLSFDHR       |
| P06959 | ODP2_ECOLI | Dihydrolypoyllysine-resid QEAPAAAPAPAAGVK    |
| P06959 | ODP2_ECOLI | Dihydrolypoyllysine-resid RAEAAPAATGGGIPGmI  |
| P06959 | ODP2_ECOLI | Dihydrolypoyllysine-resid RAEAAPAATGGGIPGMI  |
| P06959 | ODP2_ECOLI | Dihydrolypoyllysine-resid SAMePVWNGK         |
| P06959 | ODP2_ECOLI | Dihydrolypoyllysine-resid SAMePVWNGKEFVPR    |
| P06959 | ODP2_ECOLI | Dihydrolypoyllysine-resid SAMEPVWNGK         |
| P06959 | ODP2_ECOLI | Dihydrolypoyllysine-resid SAMEPVWNGKEFVPR    |
| P06959 | ODP2_ECOLI | Dihydrolypoyllysine-resid SEFAENDAYVHATPLIR  |
| P06959 | ODP2_ECOLI | Dihydrolypoyllysine-resid SEFAENDAYVHATPLIRR |
| P06959 | ODP2_ECOLI | Dihydrolypoyllysine-resid TDITELEAFR         |
| P06959 | ODP2_ECOLI | Dihydrolypoyllysine-resid TDITELEAFRK        |
| P06959 | ODP2_ECOLI | Dihydrolypoyllysine-resid TGSLImIFEVEGAAPAA  |
| P06959 | ODP2_ECOLI | Dihydrolypoyllysine-resid TQTGALImIFDSADGA/  |
| P06959 | ODP2_ECOLI | Dihydrolypoyllysine-resid TQTGALIMIFDSADGAA/ |
| P06959 | ODP2_ECOLI | Dihydrolypoyllysine-resid TQTGALIMIFDSADGAA/ |
| P06959 | ODP2_ECOLI | Dihydrolypoyllysine-resid VDFSKFGEIEEVELGR   |
| P06959 | ODP2_ECOLI | Dihydrolypoyllysine-resid VIDGADGAR          |
| P06959 | ODP2_ECOLI | Dihydrolypoyllysine-resid VNVGDKVSTGSLImVFE  |
| P06959 | ODP2_ECOLI | Dihydrolypoyllysine-resid VNVGDKVSTGSLIMVFE  |
| P06959 | ODP2_ECOLI | Dihydrolypoyllysine-resid VPDIGADEVEITEILVK  |
| P06959 | ODP2_ECOLI | Dihydrolypoyllysine-resid VSTGSLImVFEVAGEAC  |
| P06959 | ODP2_ECOLI | Dihydrolypoyllysine-resid VSTGSLIMVFEVAGEAG, |
| P06959 | ODP2_ECOLI | Dihydrolypoyllysine-resid VSVGDKTQTGALImIFD  |
| P06959 | ODP2_ECOLI | Dihydrolypoyllysine-resid VSVGDKTQTGALIMIFD! |
| P06959 | ODP2_ECOLI | Dihydrolypoyllysine-resid VSVGDKTQTGALIMIFD! |
| P06959 | ODP2_ECOLI | Dihydrolypoyllysine-resid YINIGVAVDTPNGLVVP  |

|        |            |                           |                     |
|--------|------------|---------------------------|---------------------|
| P06959 | ODP2_ECOLI | Dihydrolipoyllysine-resid | YINIGVAVDTPNGLVVPV  |
| P06959 | ODP2_ECOLI | Dihydrolipoyllysine-resid | YINIGVAVDTPNGLVVPV  |
| P0AA16 | OMPR_ECOLI | Transcriptional regulator | YLTEQGFQVR          |
| P27298 | OPDA_ECOLI | Oligopeptidase A          | ETGQSFLDNILSR       |
| P27298 | OPDA_ECOLI | Oligopeptidase A          | FEEEGIFNR           |
| P27298 | OPDA_ECOLI | Oligopeptidase A          | NYQAALFILR          |
| P27298 | OPDA_ECOLI | Oligopeptidase A          | QLEFGLDFDR          |
| P23843 | OPPA_ECOLI | Periplasmic oligopeptide  | AQGNmPAYGYTPPYTI    |
| P23843 | OPPA_ECOLI | Periplasmic oligopeptide  | SPAFDSImAETLK       |
| P23843 | OPPA_ECOLI | Periplasmic oligopeptide  | SPAFDSIMAETLK       |
| P0COL2 | OSMC_ECOLI | Peroxiredoxin osmC        | AEITLDYQLK          |
| P0COL2 | OSMC_ECOLI | Peroxiredoxin osmC        | AEITLDYQLKS         |
| P0COL2 | OSMC_ECOLI | Peroxiredoxin osmC        | GKGTVSTESGVLNQQPY   |
| P0COL2 | OSMC_ECOLI | Peroxiredoxin osmC        | GTVSTESGVLNQQPYGF   |
| P0COL2 | OSMC_ECOLI | Peroxiredoxin osmC        | IALKSEVAVPGIDASTFDG |
| P31677 | OTSA_ECOLI | Alpha,alpha-trehalose-pl  | TEVYPIGIEPK         |
| P31663 | PANC_ECOLI | Pantothenate synthetase   | AVILVAAWLGDAR       |
| P31663 | PANC_ECOLI | Pantothenate synthetase   | mLIETLPLLR          |
| P22259 | PCKA_ECOLI | Phosphoenolpyruvate ca    | DTFWWADKGG          |
| P22259 | PCKA_ECOLI | Phosphoenolpyruvate ca    | EAEPEIYN AIR        |
| P22259 | PCKA_ECOLI | Phosphoenolpyruvate ca    | GVLTLNGAVAVDTGIFTG  |
| P22259 | PCKA_ECOLI | Phosphoenolpyruvate ca    | LFIDNFDKYDTPAGAAL   |
| P22259 | PCKA_ECOLI | Phosphoenolpyruvate ca    | LFVVDAFCGANPDTR     |
| P22259 | PCKA_ECOLI | Phosphoenolpyruvate ca    | mQLIGGTWYGGEmKI     |
| P22259 | PCKA_ECOLI | Phosphoenolpyruvate ca    | NDNKPLSPETWQH LK    |
| P22259 | PCKA_ECOLI | Phosphoenolpyruvate ca    | VIFLTADAFGVLPPVSR   |
| P22259 | PCKA_ECOLI | Phosphoenolpyruvate ca    | VSYPIYHIDNIVKPVSK   |
| P15288 | PEPD_ECOLI | Aminoacyl-histidine dipe  | EAVPAGFETFK         |
| P21165 | PEPQ_ECOLI | Xaa-Pro dipeptidase       | ADGIGSLLPAAR        |
| P21165 | PEPQ_ECOLI | Xaa-Pro dipeptidase       | ALQLGIEASNINPK      |
| P21165 | PEPQ_ECOLI | Xaa-Pro dipeptidase       | GNIGYIGPVPER        |
| P29745 | PEPT_ECOLI | Peptidase T               | FLNYVSLDTQSK        |
| P29745 | PEPT_ECOLI | Peptidase T               | GVmVNALSLAAR        |
| P0A9N4 | PFLA_ECOLI | Pyruvate formate-lyase 1  | IELLPYHEL GK        |
| P0A9N4 | PFLA_ECOLI | Pyruvate formate-lyase 1  | YVVVPGWSDDDSAHR     |
| P09373 | PFLB_ECOLI | Formate acetyltransferase | EmLLDAmENPEKY PQ    |
| P09373 | PFLB_ECOLI | Formate acetyltransferase | ITEQEAQEmVDHLVmk    |
| P09373 | PFLB_ECOLI | Formate acetyltransferase | IVGLQTEAPLKR        |
| P09373 | PFLB_ECOLI | Formate acetyltransferase | LATAWEGFTK          |
| P09373 | PFLB_ECOLI | Formate acetyltransferase | QMQFFGAR            |
| P09373 | PFLB_ECOLI | Formate acetyltransferase | SEPIKGDVLNYDEVmER   |
| P09373 | PFLB_ECOLI | Formate acetyltransferase | SGVLTGLPDAYGR       |
| P09373 | PFLB_ECOLI | Formate acetyltransferase | TSTFLDVYIER         |
| P09373 | PFLB_ECOLI | Formate acetyltransferase | VALYGIDYLMK         |
| P09373 | PFLB_ECOLI | Formate acetyltransferase | VDDLAVDLVER         |
| P0A799 | PGK_ECOLI  | Phosphoglycerate kinase   | ASLPTIELALK         |
| P0A799 | PGK_ECOLI  | Phosphoglycerate kinase   | FADVACAGPLLAELDA    |
| P0A799 | PGK_ECOLI  | Phosphoglycerate kinase   | IADQLIVGGGIANTFIAAI |

|        |            |                                              |
|--------|------------|----------------------------------------------|
| P0A799 | PGK_ECOLI  | Phosphoglycerate kinase ISYISTGGGAFLEFVEGK   |
| P0A799 | PGK_ECOLI  | Phosphoglycerate kinase LLTTCNIPVPSDVR       |
| P0A799 | PGK_ECOLI  | Phosphoglycerate kinase LTVLDSLSK            |
| P0A799 | PGK_ECOLI  | Phosphoglycerate kinase SLYEADLVDEAK         |
| P0A799 | PGK_ECOLI  | Phosphoglycerate kinase SLYEADLVDEAKR        |
| P0A799 | PGK_ECOLI  | Phosphoglycerate kinase TILWNGPVGVFEPNFR     |
| P0A799 | PGK_ECOLI  | Phosphoglycerate kinase VATEFSETAPATLK       |
| P0A799 | PGK_ECOLI  | Phosphoglycerate kinase VLPAVAmLEER          |
| P0A799 | PGK_ECOLI  | Phosphoglycerate kinase VLPAVAMLEER          |
| P0A799 | PGK_ECOLI  | Phosphoglycerate kinase YAALCDVFVMDAFGTA     |
| P0A799 | PGK_ECOLI  | Phosphoglycerate kinase YAALCDVFVMDAFGTAI    |
| P36938 | PGM_ECOLI  | Phosphoglucomutase ANALLADGLK                |
| P23836 | PHOP_ECOLI | Transcriptional regulator SNDVSLPILVLTAR     |
| P00490 | PHSM_ECOLI | Maltodextrin phosphoryl FNDGDFLR             |
| P00490 | PHSM_ECOLI | Maltodextrin phosphoryl LIPAADISEQISTAGK     |
| P00490 | PHSM_ECOLI | Maltodextrin phosphoryl LWQATHAHPFDLTK       |
| P00490 | PHSM_ECOLI | Maltodextrin phosphoryl NIIFAINK             |
| P00490 | PHSM_ECOLI | Maltodextrin phosphoryl QCNPALAALLDK         |
| P00490 | PHSM_ECOLI | Maltodextrin phosphoryl SNYPWFR              |
| P00490 | PHSM_ECOLI | Maltodextrin phosphoryl TFAYTNHTLmPEALER     |
| P00490 | PHSM_ECOLI | Maltodextrin phosphoryl TGIEINPQAIFDIQIK     |
| P00490 | PHSM_ECOLI | Maltodextrin phosphoryl VADVINDPLVGDK        |
| P00490 | PHSM_ECOLI | Maltodextrin phosphoryl VADVINDPLVGDKLK      |
| P00490 | PHSM_ECOLI | Maltodextrin phosphoryl VGEENIFIFGHTVEQVK    |
| P00490 | PHSM_ECOLI | Maltodextrin phosphoryl VVFLPDYCVSAAEK       |
| P00490 | PHSM_ECOLI | Maltodextrin phosphoryl YGLNSAAEMTPR         |
| P05055 | PNP_ECOLI  | Polyribonucleotide nucle AAVAGIAMGLVK        |
| P05055 | PNP_ECOLI  | Polyribonucleotide nucle AKPGQDFFPLTVNYQER   |
| P05055 | PNP_ECOLI  | Polyribonucleotide nucle ALTEETGTTIEIEDDGTVK |
| P05055 | PNP_ECOLI  | Polyribonucleotide nucle DAQVLDELmGER        |
| P05055 | PNP_ECOLI  | Polyribonucleotide nucle EIMQVALNQAK         |
| P05055 | PNP_ECOLI  | Polyribonucleotide nucle GDISEFAPR           |
| P05055 | PNP_ECOLI  | Polyribonucleotide nucle GETQALVTATLGTAR     |
| P05055 | PNP_ECOLI  | Polyribonucleotide nucle IVDFGAFVAIGGGK      |
| P05055 | PNP_ECOLI  | Polyribonucleotide nucle LHILGVmEQAINAPR     |
| P05055 | PNP_ECOLI  | Polyribonucleotide nucle RIEEITAEIEVGR       |
| P23869 | PPIB_ECOLI | Peptidyl-prolyl cis-trans i EGFYNNTIFHR      |
| P23869 | PPIB_ECOLI | Peptidyl-prolyl cis-trans i VINGFmIQGGGFEPGn |
| P45577 | PROQ_ECOLI | ProP effector AGQNAmDATVLEITK                |
| P45577 | PROQ_ECOLI | ProP effector EEQHTPVSDISALTVGQ/             |
| P45577 | PROQ_ECOLI | ProP effector EVIAFLAER                      |
| P45577 | PROQ_ECOLI | ProP effector IGIFQDLVDR                     |
| P45577 | PROQ_ECOLI | ProP effector LYTSSWR                        |
| P45577 | PROQ_ECOLI | ProP effector VDLDGNPCGELDEQHV               |
| P45577 | PROQ_ECOLI | ProP effector VQLNSGmSLIVR                   |
| P45577 | PROQ_ECOLI | ProP effector VQLNSGMSLIVR                   |
| P23830 | PSS_ECOLI  | CDP-diacylglycerol--serin DAAYHFQGDADNDQLS   |
| P23830 | PSS_ECOLI  | CDP-diacylglycerol--serin DLQSIADYPVK        |

|        |             |                                               |
|--------|-------------|-----------------------------------------------|
| P23830 | PSS_ECOLI   | CDP-diacylglycerol--serin IGAAASNTNADWYCR     |
| P23830 | PSS_ECOLI   | CDP-diacylglycerol--serin LDLENAILIHDPQLELAPC |
| P23830 | PSS_ECOLI   | CDP-diacylglycerol--serin LQYYVNTDQLVVR       |
| P23830 | PSS_ECOLI   | CDP-diacylglycerol--serin TANDFYIPEDEPFK      |
| P08839 | PT1_ECOLI   | Phosphoenolpyruvate-pr ALLLKEDEIVDR           |
| P08839 | PT1_ECOLI   | Phosphoenolpyruvate-pr DALPTEEEQFAAYK         |
| P08839 | PT1_ECOLI   | Phosphoenolpyruvate-pr EENPFLGWR              |
| P08839 | PT1_ECOLI   | Phosphoenolpyruvate-pr mISGILASPGIAFGK        |
| P08839 | PT1_ECOLI   | Phosphoenolpyruvate-pr SLELPAIVGTGSVTSQVK     |
| P08839 | PT1_ECOLI   | Phosphoenolpyruvate-pr VLAEQALAQPTTDELMT      |
| P08839 | PT1_ECOLI   | Phosphoenolpyruvate-pr VLGFITDAGGR            |
| P69783 | PTGA_ECOLI  | Glucose-specific phospho LSGSVTVGETPVIR       |
| P69783 | PTGA_ECOLI  | Glucose-specific phospho VGDTVIEFDLPLLEEK     |
| P69783 | PTGA_ECOLI  | Glucose-specific phospho VKVGDTVIEFDLPLLEEK   |
| P69797 | PTNAB_ECOLI | PTS system mannose-spe IIVVSDEVAADTVR         |
| P69829 | PTSN_ECOLI  | Nitrogen regulatory prot ALEIISELAAK          |
| P0A7D4 | PURA_ECOLI  | Adenylosuccinate synthe AVQLNLSLGSFCLTK       |
| P0A7D4 | PURA_ECOLI  | Adenylosuccinate synthe EVTTTTPLAADDWK        |
| P0A7D4 | PURA_ECOLI  | Adenylosuccinate synthe GNNVVVLGTQWGDEGI      |
| P0A7D4 | PURA_ECOLI  | Adenylosuccinate synthe GNNVVVLGTQWGDEGI      |
| P0A7D4 | PURA_ECOLI  | Adenylosuccinate synthe IVDLLTER              |
| P0A7D4 | PURA_ECOLI  | Adenylosuccinate synthe SGLPQAALNYIK          |
| P0A7D4 | PURA_ECOLI  | Adenylosuccinate synthe TGWLDTVAVR            |
| P0A7D4 | PURA_ECOLI  | Adenylosuccinate synthe TVLHLIPSGILR          |
| P0A7D4 | PURA_ECOLI  | Adenylosuccinate synthe VGDLFDKETFAEK         |
| P0A7D4 | PURA_ECOLI  | Adenylosuccinate synthe YVDYVLGILK            |
| P0A7E5 | PYRG_ECOLI  | CTP synthase GLDAILVPGGFGYR                   |
| P28304 | QOR1_ECOLI  | Quinone oxidoreductase AIGINFIDTYIR           |
| P02925 | RBSB_ECOLI  | D-ribose-binding peripla: ILLINPTDSDAVGNAVK   |
| P02925 | RBSB_ECOLI  | D-ribose-binding peripla: LAATIAQLPDQIGAK     |
| P07012 | RF2_ECOLI   | Peptide chain release fac ISGDYAYGWLR         |
| P0A7I4 | RF3_ECOLI   | Peptide chain release f VLLFGQAIQTAGTVK       |
| P0AG30 | RHO_ECOLI   | Transcription terminatioi DVIILLDSITR         |
| P0AG30 | RHO_ECOLI   | Transcription terminatioi KQDIIFAILK          |
| P0AG30 | RHO_ECOLI   | Transcription terminatioi QDIIFAILK           |
| P0AG30 | RHO_ECOLI   | Transcription terminatioi VLDLASPIGR          |
| P0A8A8 | RIMP_ECOLI  | Ribosome maturation fa: ANLVPHF               |
| P0A8A8 | RIMP_ECOLI  | Ribosome maturation fa: AVDGE mITVTVEGK       |
| P0A8A8 | RIMP_ECOLI  | Ribosome maturation fa: AVDGE mITVTVEGKDE     |
| P0A8A8 | RIMP_ECOLI  | Ribosome maturation fa: AVDGEMITVTVEGK        |
| P0A8A8 | RIMP_ECOLI  | Ribosome maturation fa: AVDGEMITVTVEGKDEV     |
| P0A8A8 | RIMP_ECOLI  | Ribosome maturation fa: DEVFALSNIQK           |
| P0A8A8 | RIMP_ECOLI  | Ribosome maturation fa: FVGEEVTLVLR           |
| P0A8A8 | RIMP_ECOLI  | Ribosome maturation fa: PLFTAHEYAR            |
| P0A7L0 | RL1_ECOLI   | 50S ribosomal protein L1 AAGAELVGMEDLADQI     |
| P0A7L0 | RL1_ECOLI   | 50S ribosomal protein L1 AAGAELVGMEDLADQI     |
| P0A7L0 | RL1_ECOLI   | 50S ribosomal protein L1 QYDINEAIALLK         |
| P0A7L0 | RL1_ECOLI   | 50S ribosomal protein L1 VAVFTQGANAEEAK       |

|        |            |                                             |
|--------|------------|---------------------------------------------|
| P0A7L0 | RL1_ECOLI  | 50S ribosomal protein L1 VVGQLGQVLGPR       |
| P0A7J7 | RL11_ECOLI | 50S ribosomal protein L1 GLPIPVVITVYADR     |
| P0ADY3 | RL14_ECOLI | 50S ribosomal protein L1 FDGNACVLLNNNSEQPI  |
| P0ADY3 | RL14_ECOLI | 50S ribosomal protein L1 YAGVGDIIK          |
| P02413 | RL15_ECOLI | 50S ribosomal protein L1 VEGGVVDLNTLK       |
| P02413 | RL15_ECOLI | 50S ribosomal protein L1 VILAGEVTTPVTVR     |
| P0ADY7 | RL16_ECOLI | 50S ribosomal protein L1 GLAQGTDVDFGSGFLK   |
| P0AG44 | RL17_ECOLI | 50S ribosomal protein L1 VVEPLITLAK         |
| P60422 | RL2_ECOLI  | 50S ribosomal protein L2 SAGTYVQIVAR        |
| P60422 | RL2_ECOLI  | 50S ribosomal protein L2 SANIALVLYK         |
| P0A7L3 | RL20_ECOLI | 50S ribosomal protein L2 ILADIAVFDK         |
| P0A7L3 | RL20_ECOLI | 50S ribosomal protein L2 VAFQAVIK           |
| P0A7L3 | RL20_ECOLI | 50S ribosomal protein L2 VAFTALVEK          |
| P0AG48 | RL21_ECOLI | 50S ribosomal protein IGVPFVDGGVIK          |
| P60624 | RL24_ECOLI | 50S ribosomal protein L2 EAAIQVSNVAIFNAATGI |
| P60624 | RL24_ECOLI | 50S ribosomal protein L2 VIVEGINLVK         |
| P60723 | RL4_ECOLI  | 50S ribosomal protein L4 DAQSALTVSETTFGR    |
| P60723 | RL4_ECOLI  | 50S ribosomal protein L4 DATGIDPVSLIAFDK    |
| P60723 | RL4_ECOLI  | 50S ribosomal protein L4 DFNEALVHQVVVAYAAK  |
| P75876 | RLMI_ECOLI | Ribosomal RNA large sub DVQFIEQFR           |
| P21338 | RNI_ECOLI  | Ribonuclease I FGCATRPIPNLPEAR              |
| P21338 | RNI_ECOLI  | Ribonuclease I FIFNAER                      |
| P21338 | RNI_ECOLI  | Ribonuclease I FYEAVMSSHAR                  |
| P21338 | RNI_ECOLI  | Ribonuclease I mCSSPETGLSLETAAK             |
| P21338 | RNI_ECOLI  | Ribonuclease I MCSSPETGLSLETAAK             |
| P21499 | RNR_ECOLI  | Ribonuclease R DFDDAVYCEK                   |
| P21499 | RNR_ECOLI  | Ribonuclease R DGQLVFTR                     |
| P21499 | RNR_ECOLI  | Ribonuclease R DGYGFLR                      |
| P21499 | RNR_ECOLI  | Ribonuclease R DLPLVTIDGEDAR                |
| P21499 | RNR_ECOLI  | Ribonuclease R DLPLVTIDGEDARDFDD/           |
| P21499 | RNR_ECOLI  | Ribonuclease R DYAEELLESVADRPDAEm           |
| P21499 | RNR_ECOLI  | Ribonuclease R EFILEHLTK                    |
| P21499 | RNR_ECOLI  | Ribonuclease R EFILEHLTKR                   |
| P21499 | RNR_ECOLI  | Ribonuclease R GGISFESEEAK                  |
| P21499 | RNR_ECOLI  | Ribonuclease R GHFGLALQSYAHFTSPIR           |
| P21499 | RNR_ECOLI  | Ribonuclease R GVISSVTGFGFFVR               |
| P21499 | RNR_ECOLI  | Ribonuclease R IHDKPSTEAITSF                |
| P21499 | RNR_ECOLI  | Ribonuclease R IVEVLGDNmGTGMmAVI            |
| P21499 | RNR_ECOLI  | Ribonuclease R IVEVLGDNmGTGMmAVI            |
| P21499 | RNR_ECOLI  | Ribonuclease R IVEVLGDNmGTGMmAVI            |
| P21499 | RNR_ECOLI  | Ribonuclease R IVEVLGDNmGTGMmAVI            |
| P21499 | RNR_ECOLI  | Ribonuclease R KIDFSLISSER                  |
| P21499 | RNR_ECOLI  | Ribonuclease R KVNFEPSAFAERGEK              |
| P21499 | RNR_ECOLI  | Ribonuclease R LDDLFDGLVHVSSLDNC            |
| P21499 | RNR_ECOLI  | Ribonuclease R LIEECmILANISAAR              |
| P21499 | RNR_ECOLI  | Ribonuclease R LIEECMILANISAAR              |
| P21499 | RNR_ECOLI  | Ribonuclease R LSFIDLIPDQIMGAR              |
| P21499 | RNR_ECOLI  | Ribonuclease R LWVAIADVSYYVRPSTPI           |



|        |            |                        |                    |
|--------|------------|------------------------|--------------------|
| P21499 | RNR_ECOLI  | Ribonuclease R         | mGFVVVELTQRPTR     |
| P21499 | RNR_ECOLI  | Ribonuclease R         | MGFVVVELTQRPTR     |
| P21499 | RNR_ECOLI  | Ribonuclease R         | QAIYDPENR          |
| P21499 | RNR_ECOLI  | Ribonuclease R         | SVLAELGLELPGGNKPEP |
| P21499 | RNR_ECOLI  | Ribonuclease R         | TCIHGDQVLAQPLGADR  |
| P21499 | RNR_ECOLI  | Ribonuclease R         | THEIPYIWPQAVEQQVA  |
| P21499 | RNR_ECOLI  | Ribonuclease R         | VNFEPDSAFR         |
| P21499 | RNR_ECOLI  | Ribonuclease R         | VNFEPDSAFRGEK      |
| P21499 | RNR_ECOLI  | Ribonuclease R         | VWHILQGDQDLR       |
| P21499 | RNR_ECOLI  | Ribonuclease R         | VWHILQGDQDLREQVA   |
| P21499 | RNR_ECOLI  | Ribonuclease R         | YFTEAGVGFVVPDDSR   |
| POA7Z4 | RPOA_ECOLI | DNA-directed RNA polyn | AATILAEQLEAFVDLR   |
| POA7Z4 | RPOA_ECOLI | DNA-directed RNA polyn | AEAIHYIGDLVQR      |
| POA7Z4 | RPOA_ECOLI | DNA-directed RNA polyn | LLVDACYSPPER       |
| POA7Z4 | RPOA_ECOLI | DNA-directed RNA polyn | SLTEIKDVLASR       |
| POA7Z4 | RPOA_ECOLI | DNA-directed RNA polyn | VTLEPLER           |
| POA8V2 | RPOB_ECOLI | DNA-directed RNA polyn | ALEIEEmQLK         |
| POA8V2 | RPOB_ECOLI | DNA-directed RNA polyn | ALEIEEMQLK         |
| POA8V2 | RPOB_ECOLI | DNA-directed RNA polyn | AVAVDSGVTAVAK      |
| POA8V2 | RPOB_ECOLI | DNA-directed RNA polyn | AVLVAGGVEAEK       |
| POA8V2 | RPOB_ECOLI | DNA-directed RNA polyn | AYDLGADVR          |
| POA8V2 | RPOB_ECOLI | DNA-directed RNA polyn | FIEQDPEGQYGLEAAFR  |
| POA8V2 | RPOB_ECOLI | DNA-directed RNA polyn | GGVVQYVDASR        |
| POA8V2 | RPOB_ECOLI | DNA-directed RNA polyn | GmPIATPVFDGAK      |
| POA8V2 | RPOB_ECOLI | DNA-directed RNA polyn | GMPIATPVFDGAK      |
| POA8V2 | RPOB_ECOLI | DNA-directed RNA polyn | ISALPGGLTR         |
| POA8V2 | RPOB_ECOLI | DNA-directed RNA polyn | ITQGDDLAPGVLK      |
| POA8V2 | RPOB_ECOLI | DNA-directed RNA polyn | KLPATIILR          |
| POA8V2 | RPOB_ECOLI | DNA-directed RNA polyn | LGDLPTSGQIR        |
| POA8V2 | RPOB_ECOLI | DNA-directed RNA polyn | LGEPVFDVQECQIR     |
| POA8V2 | RPOB_ECOLI | DNA-directed RNA polyn | LGPEEITADIPNVGEAAL |
| POA8V2 | RPOB_ECOLI | DNA-directed RNA polyn | LIEVPVEYIAGK       |
| POA8V2 | RPOB_ECOLI | DNA-directed RNA polyn | LPATIILR           |
| POA8V2 | RPOB_ECOLI | DNA-directed RNA polyn | LSALVEIYR          |
| POA8V2 | RPOB_ECOLI | DNA-directed RNA polyn | MNIGQILETHLgmAAK   |
| POA8V2 | RPOB_ECOLI | DNA-directed RNA polyn | QKVDLSTFSDEEVMR    |
| POA8V2 | RPOB_ECOLI | DNA-directed RNA polyn | STGSYSLVTQQPLGGK   |
| POA8V2 | RPOB_ECOLI | DNA-directed RNA polyn | SVFPIQSYSGNSELQYVS |
| POA8V2 | RPOB_ECOLI | DNA-directed RNA polyn | SVGEmAENQFR        |
| POA8V2 | RPOB_ECOLI | DNA-directed RNA polyn | SVGEMAENQFR        |
| POA8T7 | RPOC_ECOLI | DNA-directed RNA polyn | AILWmIVPK          |
| POA8T7 | RPOC_ECOLI | DNA-directed RNA polyn | AILWMIVPK          |
| POA8T7 | RPOC_ECOLI | DNA-directed RNA polyn | EGLNLVQYFISTHGAR   |
| POA8T7 | RPOC_ECOLI | DNA-directed RNA polyn | FATSDLNDLYR        |
| POA8T7 | RPOC_ECOLI | DNA-directed RNA polyn | FTDmIDGQTITR       |
| POA8T7 | RPOC_ECOLI | DNA-directed RNA polyn | FTDMIDGQTITR       |
| POA8T7 | RPOC_ECOLI | DNA-directed RNA polyn | GLMAKPDGSIITPITAN  |
| POA8T7 | RPOC_ECOLI | DNA-directed RNA polyn | GLPYSIVNQALGK      |

|        |            |                                              |
|--------|------------|----------------------------------------------|
| POA8T7 | RPOC_ECOLI | DNA-directed RNA polyn IALASPD MIR           |
| POA8T7 | RPOC_ECOLI | DNA-directed RNA polyn IGLLLDmPLRDIER        |
| POA8T7 | RPOC_ECOLI | DNA-directed RNA polyn LGIQAFEPVLI EGK       |
| POA8T7 | RPOC_ECOLI | DNA-directed RNA polyn LIDEFGR               |
| POA8T7 | RPOC_ECOLI | DNA-directed RNA polyn LLDLAAPDIIVR          |
| POA8T7 | RPOC_ECOLI | DNA-directed RNA polyn LVITPVDGSDPYEE mIPK   |
| POA8T7 | RPOC_ECOLI | DNA-directed RNA polyn mGAEAIQALLK           |
| POA8T7 | RPOC_ECOLI | DNA-directed RNA polyn MGAEAIQALLK           |
| POA8T7 | RPOC_ECOLI | DNA-directed RNA polyn QLN VFEGER            |
| POA8T7 | RPOC_ECOLI | DNA-directed RNA polyn SVITVGPYLR            |
| POA8T7 | RPOC_ECOLI | DNA-directed RNA polyn SWSFGEVK              |
| POA8T7 | RPOC_ECOLI | DNA-directed RNA polyn VADLFEAR              |
| POA8T7 | RPOC_ECOLI | DNA-directed RNA polyn VIDIWAAANDR           |
| POA8T7 | RPOC_ECOLI | DNA-directed RNA polyn VTAEDVLKPGTADILVPR    |
| POA8T7 | RPOC_ECOLI | DNA-directed RNA polyn YIVNEVQDVYR           |
| POA805 | RRF_ECOLI  | Ribosome-recycling factc AImASDLGLNPNSAGS    |
| POA805 | RRF_ECOLI  | Ribosome-recycling factc ASPSLLDGIVVEYYGTPTI |
| POA805 | RRF_ECOLI  | Ribosome-recycling factc IEAALADKEAELmQF     |
| POA805 | RRF_ECOLI  | Ribosome-recycling factc KIEAALADKEAELmQF    |
| POA805 | RRF_ECOLI  | Ribosome-recycling factc VPLPPLTEER          |
| POAG67 | RS1_ECOLI  | 30S ribosomal protein S1 <QLAEDPFNNWVALN     |
| POAG67 | RS1_ECOLI  | 30S ribosomal protein S1 <QLAEDPFNNWVALN     |
| POAG67 | RS1_ECOLI  | 30S ribosomal protein S1 <QLGEDPWVAIAK       |
| POAG67 | RS1_ECOLI  | 30S ribosomal protein S1 AFLPGSLVDVDR        |
| POAG67 | RS1_ECOLI  | 30S ribosomal protein S1 AFLPGSLVDVDRPVR     |
| POAG67 | RS1_ECOLI  | 30S ribosomal protein S1 AKDEADEKDAIATV NK   |
| POAG67 | RS1_ECOLI  | 30S ribosomal protein S1 ANPWQQFAETHNK       |
| POAG67 | RS1_ECOLI  | 30S ribosomal protein S1 ANPWQQFAETHNKGDI    |
| POAG67 | RS1_ECOLI  | 30S ribosomal protein S1 ANPWQQFAETHNKGDI    |
| POAG67 | RS1_ECOLI  | 30S ribosomal protein S1 AVIESENSAERDQ LLENL |
| POAG67 | RS1_ECOLI  | 30S ribosomal protein S1 AVIESENSAERDQ LLENL |
| POAG67 | RS1_ECOLI  | 30S ribosomal protein S1 AYEDAETVTGVINGK     |
| POAG67 | RS1_ECOLI  | 30S ribosomal protein S1 DQ LLENLQEGmEVK     |
| POAG67 | RS1_ECOLI  | 30S ribosomal protein S1 DQ LLENLQEGMEVK     |
| POAG67 | RS1_ECOLI  | 30S ribosomal protein S1 DRVEDATLVLSVGDEVE,  |
| POAG67 | RS1_ECOLI  | 30S ribosomal protein S1 DTLHLEGK            |
| POAG67 | RS1_ECOLI  | 30S ribosomal protein S1 DTLHLEGKELEFK       |
| POAG67 | RS1_ECOLI  | 30S ribosomal protein S1 DVVLVDAGLK          |
| POAG67 | RS1_ECOLI  | 30S ribosomal protein S1 EYKKGDEIAAVVLQVDAI  |
| POAG67 | RS1_ECOLI  | 30S ribosomal protein S1 GATVELADGVEGYLR     |
| POAG67 | RS1_ECOLI  | 30S ribosomal protein S1 GDEIAAVVLQVDAER     |
| POAG67 | RS1_ECOLI  | 30S ribosomal protein S1 GDEIAAVVLQVDAERER   |
| POAG67 | RS1_ECOLI  | 30S ribosomal protein S1 GGFTVELNGIR         |
| POAG67 | RS1_ECOLI  | 30S ribosomal protein S1 GVVVAIDKDVVLVDAGL   |
| POAG67 | RS1_ECOLI  | 30S ribosomal protein S1 GVVVAIDKDVVLVDAGL   |
| POAG67 | RS1_ECOLI  | 30S ribosomal protein S1 HEAWITL EK          |
| POAG67 | RS1_ECOLI  | 30S ribosomal protein S1 HPSEIVNVGDEITVK     |
| POAG67 | RS1_ECOLI  | 30S ribosomal protein S1 KGDEIAAVVLQVDAER    |

|        |            |                                              |
|--------|------------|----------------------------------------------|
| POAG67 | RS1_ECOLI  | 30S ribosomal protein S1 KGDEIAAVVLQVDAERE   |
| POAG67 | RS1_ECOLI  | 30S ribosomal protein S1 mTESFAQLFEESLK      |
| POAG67 | RS1_ECOLI  | 30S ribosomal protein S1 mTESFAQLFEESLKEIE'  |
| POAG67 | RS1_ECOLI  | 30S ribosomal protein S1 mTESFAQLFEESLKEIE'  |
| POAG67 | RS1_ECOLI  | 30S ribosomal protein S1 MTESFAQLFEESLK      |
| POAG67 | RS1_ECOLI  | 30S ribosomal protein S1 MTESFAQLFEESLKEIETF |
| POAG67 | RS1_ECOLI  | 30S ribosomal protein S1 NLDYGFVFDLGGVDGL    |
| POAG67 | RS1_ECOLI  | 30S ribosomal protein S1 NLDYGFVFDLGGVDGL    |
| POAG67 | RS1_ECOLI  | 30S ribosomal protein S1 NLDYGFVFDLGGVDGL    |
| POAG67 | RS1_ECOLI  | 30S ribosomal protein S1 QEDANFSNNAmAEAFk    |
| POAG67 | RS1_ECOLI  | 30S ribosomal protein S1 QEDANFSNNAMAEAFK    |
| POAG67 | RS1_ECOLI  | 30S ribosomal protein S1 QLAEDPFNNWVALNK     |
| POAG67 | RS1_ECOLI  | 30S ribosomal protein S1 QLAEDPFNNWVALNKK    |
| POAG67 | RS1_ECOLI  | 30S ribosomal protein S1 QLGEDPWVIAIK        |
| POAG67 | RS1_ECOLI  | 30S ribosomal protein S1 RAVIESENSAERDQLLEN  |
| POAG67 | RS1_ECOLI  | 30S ribosomal protein S1 RAVIESENSAERDQLLEN  |
| POAG67 | RS1_ECOLI  | 30S ribosomal protein S1 RHEAWITLEK          |
| POAG67 | RS1_ECOLI  | 30S ribosomal protein S1 SESAIPAEQFK         |
| POAG67 | RS1_ECOLI  | 30S ribosomal protein S1 TESFAQLFEESLK       |
| POAG67 | RS1_ECOLI  | 30S ribosomal protein S1 TESFAQLFEESLKEIETR  |
| POAG67 | RS1_ECOLI  | 30S ribosomal protein S1 TESFAQLFEESLKEIETRP |
| POAG67 | RS1_ECOLI  | 30S ribosomal protein S1 TRVSLGLK            |
| POAG67 | RS1_ECOLI  | 30S ribosomal protein S1 VEDATLVLSVGDEVEAK   |
| POAG67 | RS1_ECOLI  | 30S ribosomal protein S1 VKGGFTVELNGIR       |
| POAG67 | RS1_ECOLI  | 30S ribosomal protein S1 VKHPSEIVNVGDEITVK   |
| POAG67 | RS1_ECOLI  | 30S ribosomal protein S1 VTNLDYGCVEIEEGVE    |
| POAG67 | RS1_ECOLI  | 30S ribosomal protein S1 VVNVGDVVEVmVLDID    |
| POAG67 | RS1_ECOLI  | 30S ribosomal protein S1 VVNVGDVVEVmVLDID    |
| POAG67 | RS1_ECOLI  | 30S ribosomal protein S1 VVNVGDVVEVMVLDIDI   |
| POAG67 | RS1_ECOLI  | 30S ribosomal protein S1 VVNVGDVVEVMVLDIDI   |
| POAG67 | RS1_ECOLI  | 30S ribosomal protein S1 VVNVGDVVEVMVLDIDI   |
| POA7R5 | RS10_ECOLI | 30S ribosomal protein S1 ERFTVLISPHVNK       |
| POA7R5 | RS10_ECOLI | 30S ribosomal protein S1 FTVLISPHVNK         |
| POA7R5 | RS10_ECOLI | 30S ribosomal protein S1 FTVLISPHVNKDAR      |
| POA7R5 | RS10_ECOLI | 30S ribosomal protein S1 GPIPLPTR            |
| POA7R5 | RS10_ECOLI | 30S ribosomal protein S1 GPIPLPTRK           |
| POA7R5 | RS10_ECOLI | 30S ribosomal protein S1 LIDQATAEIVETAK      |
| POA7R5 | RS10_ECOLI | 30S ribosomal protein S1 LIDQATAEIVETAKR     |
| POA7R5 | RS10_ECOLI | 30S ribosomal protein S1 LVDIVEPTEK          |
| POA7R5 | RS10_ECOLI | 30S ribosomal protein S1 LVDIVEPTEKTVDALMR   |
| POA7R9 | RS11_ECOLI | 30S ribosomal protein S1 <QGNALGWATAGGS(     |
| POA7R9 | RS11_ECOLI | 30S ribosomal protein S1 <QVSDGVAHIHASFNI    |
| POA7R9 | RS11_ECOLI | 30S ribosomal protein S1 ALNAAGFR            |
| POA7R9 | RS11_ECOLI | 30S ribosomal protein S1 KSTPFAAQVAAER       |
| POA7R9 | RS11_ECOLI | 30S ribosomal protein S1 QGNALGWATAGGSGFF    |
| POA7R9 | RS11_ECOLI | 30S ribosomal protein S1 QVSDGVAHIHASFNNTI'  |
| POA7R9 | RS11_ECOLI | 30S ribosomal protein S1 STPFAAQVAAER        |
| POA7S3 | RS12_ECOLI | 30S ribosomal protein S1 ATVNQLVR            |

|        |            |                                              |
|--------|------------|----------------------------------------------|
| P0A7S3 | RS12_ECOLI | 30S ribosomal protein S1 GALDCSGVK           |
| P0A7S3 | RS12_ECOLI | 30S ribosomal protein S1 GALDCSGVKDR         |
| P0A7S3 | RS12_ECOLI | 30S ribosomal protein S1 LTNGFEVTSYIGGEGHNI  |
| P0A7S3 | RS12_ECOLI | 30S ribosomal protein S1 SNVPALEACPQK        |
| P0A7S3 | RS12_ECOLI | 30S ribosomal protein S1 SNVPALEACPQKR       |
| P0A7S3 | RS12_ECOLI | 30S ribosomal protein S1 VRLTNGFEVTSYIGGEGH  |
| P0A7S9 | RS13_ECOLI | 30S ribosomal protein S1 AILAAAGIAEDVK       |
| P0A7S9 | RS13_ECOLI | 30S ribosomal protein S1 AILAAAGIAEDVKISELSE |
| P0A7S9 | RS13_ECOLI | 30S ribosomal protein S1 FVVEGDLR            |
| P0A7S9 | RS13_ECOLI | 30S ribosomal protein S1 HAVIALTSIYGVGK      |
| P0A7S9 | RS13_ECOLI | 30S ribosomal protein S1 IAGINIPDHK          |
| P0A7S9 | RS13_ECOLI | 30S ribosomal protein S1 ISELSEGQIDTLR       |
| P0A7S9 | RS13_ECOLI | 30S ribosomal protein S1 ISELSEGQIDTLRDEVAK  |
| P0A7S9 | RS13_ECOLI | 30S ribosomal protein S1 LmDLGCRY            |
| P0A7S9 | RS13_ECOLI | 30S ribosomal protein S1 LMDLGCYR            |
| P0A7S9 | RS13_ECOLI | 30S ribosomal protein S1 SKAILAAAGIAEDVK     |
| P0AG59 | RS14_ECOLI | 30S ribosomal protein S1 AIISDVNASDEDRWNAV   |
| P0AG59 | RS14_ECOLI | 30S ribosomal protein S1 RVALADKYFAK         |
| P0AG59 | RS14_ECOLI | 30S ribosomal protein S1 VALADKYFAK          |
| P0ADZ4 | RS15_ECOLI | 30S ribosomal protein S1 DANDTGSTEVQVALLTA   |
| P0ADZ4 | RS15_ECOLI | 30S ribosomal protein S1 DANDTGSTEVQVALLTA   |
| P0ADZ4 | RS15_ECOLI | 30S ribosomal protein S1 IVSEFGR             |
| P0ADZ4 | RS15_ECOLI | 30S ribosomal protein S1 KLLDYLK             |
| P0ADZ4 | RS15_ECOLI | 30S ribosomal protein S1 KLLDYLKR            |
| P0ADZ4 | RS15_ECOLI | 30S ribosomal protein S1 LLDYLK              |
| P0ADZ4 | RS15_ECOLI | 30S ribosomal protein S1 LLDYLKR             |
| P0ADZ4 | RS15_ECOLI | 30S ribosomal protein S1 YTQLIER             |
| P0A7T3 | RS16_ECOLI | 30S ribosomal protein S1 IAHWVGQGATISDR      |
| P0A7T3 | RS16_ECOLI | 30S ribosomal protein S1 KRPFYQVVVADSR       |
| P0A7T3 | RS16_ECOLI | 30S ribosomal protein S1 PFYQVVVADSR         |
| P0A7T3 | RS16_ECOLI | 30S ribosomal protein S1 RPFYQVVVADSR        |
| P0A7T3 | RS16_ECOLI | 30S ribosomal protein S1 VGFFNPIASEK         |
| P0A7T3 | RS16_ECOLI | 30S ribosomal protein S1 VGFFNPIASEKEEGTR    |
| P0A7T3 | RS16_ECOLI | 30S ribosomal protein S1 VGFFNPIASEKEEGTRL   |
| P0AG63 | RS17_ECOLI | 30S ribosomal protein S1 LHVHDENNECGIGDVVE   |
| P0AG63 | RS17_ECOLI | 30S ribosomal protein S1 SIVVAIER            |
| P0AG63 | RS17_ECOLI | 30S ribosomal protein S1 TKSRTLVR            |
| P0A7T7 | RS18_ECOLI | 30S ribosomal protein S1 FTAEGVQEIDYK        |
| P0A7T7 | RS18_ECOLI | 30S ribosomal protein S1 FTAEGVQEIDYKDIATLK  |
| P0A7T7 | RS18_ECOLI | 30S ribosomal protein S1 NYITESGK            |
| P0A7T7 | RS18_ECOLI | 30S ribosomal protein S1 YLSLLPYTDR          |
| P0A7T7 | RS18_ECOLI | 30S ribosomal protein S1 YLSLLPYTDRHQ        |
| P0A7U3 | RS19_ECOLI | 30S ribosomal protein S1 <QHVVPVFTDEMVG+     |
| P0A7U3 | RS19_ECOLI | 30S ribosomal protein S1 GPFIDLHLLK          |
| P0A7U3 | RS19_ECOLI | 30S ribosomal protein S1 KGPFDLHLLK          |
| P0A7U3 | RS19_ECOLI | 30S ribosomal protein S1 LGEFAPTR            |
| P0A7U3 | RS19_ECOLI | 30S ribosomal protein S1 QHVVPVFTDEmVGHK     |

|        |            |                                             |
|--------|------------|---------------------------------------------|
| P0A7U3 | RS19_ECOLI | 30S ribosomal protein S1 RSTIFPNMIGLTIAVHNG |
| P0A7U3 | RS19_ECOLI | 30S ribosomal protein S1 STIFPNmIGLTIAVHNG  |
| P0A7U3 | RS19_ECOLI | 30S ribosomal protein S1 STIFPNMIGLTIAVHNGR |
| P0A7V0 | RS2_ECOLI  | 30S ribosomal protein S2 AASEAVKDAALSCDQFF' |
| P0A7V0 | RS2_ECOLI  | 30S ribosomal protein S2 AVTLYLGAVAATVR     |
| P0A7V0 | RS2_ECOLI  | 30S ribosomal protein S2 AVTLYLGAVAATVREGR  |
| P0A7V0 | RS2_ECOLI  | 30S ribosomal protein S2 DAALSCDQFFVNR      |
| P0A7V0 | RS2_ECOLI  | 30S ribosomal protein S2 DLETQSQDGTDFDKLTK  |
| P0A7V0 | RS2_ECOLI  | 30S ribosomal protein S2 DmGGLPDALFVIDADI   |
| P0A7V0 | RS2_ECOLI  | 30S ribosomal protein S2 DMGGLPDALFVIDADHE  |
| P0A7V0 | RS2_ECOLI  | 30S ribosomal protein S2 EANNLGIPVFAIVDTNSC |
| P0A7V0 | RS2_ECOLI  | 30S ribosomal protein S2 ELEKLENSLGGIK      |
| P0A7V0 | RS2_ECOLI  | 30S ribosomal protein S2 ILFVGTK            |
| P0A7V0 | RS2_ECOLI  | 30S ribosomal protein S2 ILFVGTKR           |
| P0A7V0 | RS2_ECOLI  | 30S ribosomal protein S2 LENSLLGGIK         |
| P0A7V0 | RS2_ECOLI  | 30S ribosomal protein S2 LENSLLGGIKDmGGLPD/ |
| P0A7V0 | RS2_ECOLI  | 30S ribosomal protein S2 LENSLLGGIKDMGGLPDA |
| P0A7V0 | RS2_ECOLI  | 30S ribosomal protein S2 LKDLETQSQDGTDFDK   |
| P0A7V0 | RS2_ECOLI  | 30S ribosomal protein S2 LKDLETQSQDGTDFDKLT |
| P0A7V0 | RS2_ECOLI  | 30S ribosomal protein S2 mKPFIFGAR          |
| P0A7V0 | RS2_ECOLI  | 30S ribosomal protein S2 MKPFIFGAR          |
| P0A7V0 | RS2_ECOLI  | 30S ribosomal protein S2 NKVHIINLEK         |
| P0A7V0 | RS2_ECOLI  | 30S ribosomal protein S2 PFIFGAR            |
| P0A7V0 | RS2_ECOLI  | 30S ribosomal protein S2 RAASEAVKDAALSCDQF  |
| P0A7V0 | RS2_ECOLI  | 30S ribosomal protein S2 SQDLASQAEEFVEAE    |
| P0A7V0 | RS2_ECOLI  | 30S ribosomal protein S2 TRELEKLENSLGGIK    |
| P0A7V0 | RS2_ECOLI  | 30S ribosomal protein S2 TVPmFNEALAELENK    |
| P0A7V0 | RS2_ECOLI  | 30S ribosomal protein S2 TVPMFNEALAELENK    |
| P0A7V0 | RS2_ECOLI  | 30S ribosomal protein S2 VHIINLEK           |
| P0A7V0 | RS2_ECOLI  | 30S ribosomal protein S2 WLGGmLTNWK         |
| P0A7V0 | RS2_ECOLI  | 30S ribosomal protein S2 WLGGMLTNWK         |
| P0A7U7 | RS20_ECOLI | 30S ribosomal protein S2 AFNEmQPIVDR        |
| P0A7U7 | RS20_ECOLI | 30S ribosomal protein S2 AFNEMQPIVDR        |
| P0A7U7 | RS20_ECOLI | 30S ribosomal protein S2 ANLTAQINK          |
| P0A7U7 | RS20_ECOLI | 30S ribosomal protein S2 ANLTAQINKLA        |
| P0A7U7 | RS20_ECOLI | 30S ribosomal protein S2 HKANLTAQINK        |
| P0A7U7 | RS20_ECOLI | 30S ribosomal protein S2 KVYAAIEAGDKAAAQK   |
| P0A7U7 | RS20_ECOLI | 30S ribosomal protein S2 KVYAAIEAGDK        |
| P0A7U7 | RS20_ECOLI | 30S ribosomal protein S2 VYAAIEAGDKAAAQK    |
| P0A7U7 | RS20_ECOLI | 30S ribosomal protein S2 VYAAIEAGDK         |
| P68679 | RS21_ECOLI | 30S ribosomal protein S2 AGVLAEVR           |
| P68679 | RS21_ECOLI | 30S ribosomal protein S2 EFYEKPTTER         |
| P68679 | RS21_ECOLI | 30S ribosomal protein S2 ENEPFDVALR         |
| P68679 | RS21_ECOLI | 30S ribosomal protein S2 VRENEPFDVALR       |
| P68679 | RS21_ECOLI | 30S ribosomal protein S2 VRENEPFDVALRR      |
| P0A7V3 | RS3_ECOLI  | 30S ribosomal protein S3 ADIDYNTSEAHTTYGVIG |
| P0A7V3 | RS3_ECOLI  | 30S ribosomal protein S3 EFADNLDSDFK        |
| P0A7V3 | RS3_ECOLI  | 30S ribosomal protein S3 EFADNLDSDFKVR      |



|        |           |                                             |
|--------|-----------|---------------------------------------------|
| P0A7V3 | RS3_ECOLI | 30S ribosomal protein S3 GEILGGmAAVEQPEKP   |
| P0A7V3 | RS3_ECOLI | 30S ribosomal protein S3 GEILGGMAAVEQPEKPA  |
| P0A7V3 | RS3_ECOLI | 30S ribosomal protein S3 KVVADIAGVPAQINIAEV |
| P0A7V3 | RS3_ECOLI | 30S ribosomal protein S3 LGIVKPWNSTWFANTK   |
| P0A7V3 | RS3_ECOLI | 30S ribosomal protein S3 LVADSITSQLER       |
| P0A7V3 | RS3_ECOLI | 30S ribosomal protein S3 VPLHTLR            |
| P0A7V3 | RS3_ECOLI | 30S ribosomal protein S3 VVADIAGVPAQINIAEVF |
| P0A7V3 | RS3_ECOLI | 30S ribosomal protein S3 VWIFK              |
| P0A7V3 | RS3_ECOLI | 30S ribosomal protein S3 VWIFKGEILGGmAAVEQ  |
| P0A7V3 | RS3_ECOLI | 30S ribosomal protein S3 VWIFKGEILGGMAAVEC  |
| P0A7V8 | RS4_ECOLI | 30S ribosomal protein S4 AALELAEQR          |
| P0A7V8 | RS4_ECOLI | 30S ribosomal protein S4 AVLEVAGVHNVLAK     |
| P0A7V8 | RS4_ECOLI | 30S ribosomal protein S4 EGTDLFLK           |
| P0A7V8 | RS4_ECOLI | 30S ribosomal protein S4 EKPTWLEVDAGK       |
| P0A7V8 | RS4_ECOLI | 30S ribosomal protein S4 EKPTWLEVDAGKmEGT   |
| P0A7V8 | RS4_ECOLI | 30S ribosomal protein S4 EKPTWLEVDAGKMEGT   |
| P0A7V8 | RS4_ECOLI | 30S ribosomal protein S4 GNTGENLLALLEGR     |
| P0A7V8 | RS4_ECOLI | 30S ribosomal protein S4 IYGVLER            |
| P0A7V8 | RS4_ECOLI | 30S ribosomal protein S4 LDNVVYR            |
| P0A7V8 | RS4_ECOLI | 30S ribosomal protein S4 LKGNTGENLLALLEGR   |
| P0A7V8 | RS4_ECOLI | 30S ribosomal protein S4 LKGNTGENLLALLEGRLE |
| P0A7V8 | RS4_ECOLI | 30S ribosomal protein S4 LSDYGVQLR          |
| P0A7V8 | RS4_ECOLI | 30S ribosomal protein S4 REGTDLFLK          |
| P0A7V8 | RS4_ECOLI | 30S ribosomal protein S4 RIYGVLER           |
| P0A7V8 | RS4_ECOLI | 30S ribosomal protein S4 SDLSADINEHLIVELYSK |
| P0A7V8 | RS4_ECOLI | 30S ribosomal protein S4 VKAALELAEQR        |
| P0A7V8 | RS4_ECOLI | 30S ribosomal protein S4 VVNIASYQVSPNDVVSIF |
| P0A7W1 | RS5_ECOLI | 30S ribosomal protein S5 ATIDGLENmNSPEmVA   |
| P0A7W1 | RS5_ECOLI | 30S ribosomal protein S5 ATIDGLENmNSPEmVA   |
| P0A7W1 | RS5_ECOLI | 30S ribosomal protein S5 ATIDGLENmNSPEMVA   |
| P0A7W1 | RS5_ECOLI | 30S ribosomal protein S5 ATIDGLENmNSPEMVA   |
| P0A7W1 | RS5_ECOLI | 30S ribosomal protein S5 ATIDGLENMNSPEmVA   |
| P0A7W1 | RS5_ECOLI | 30S ribosomal protein S5 ATIDGLENMNSPEMVA   |
| P0A7W1 | RS5_ECOLI | 30S ribosomal protein S5 ATIDGLENMNSPEMVA   |
| P0A7W1 | RS5_ECOLI | 30S ribosomal protein S5 AVLEVAGVHNVLAKAYC  |
| P0A7W1 | RS5_ECOLI | 30S ribosomal protein S5 AYGSTNPINVVVR      |
| P0A7W1 | RS5_ECOLI | 30S ribosomal protein S5 IFSFTALTVVGDGNGR   |
| P0A7W1 | RS5_ECOLI | 30S ribosomal protein S5 IFSFTALTVVGDGNGRVC |
| P0A7W1 | RS5_ECOLI | 30S ribosomal protein S5 NmINVALNNGTLQHP    |
| P0A7W1 | RS5_ECOLI | 30S ribosomal protein S5 NMINVALNNGTLQHPV   |
| P0A7W1 | RS5_ECOLI | 30S ribosomal protein S5 RNMINVALNNGTLQHP'  |
| P0A7W1 | RS5_ECOLI | 30S ribosomal protein S5 SVEEILGK           |
| P0A7W1 | RS5_ECOLI | 30S ribosomal protein S5 TVKGGRIFSFTALTVVGD |
| P0A7W1 | RS5_ECOLI | 30S ribosomal protein S5 VFmQPASEGTGIIAGG   |
| P0A7W1 | RS5_ECOLI | 30S ribosomal protein S5 VFmQPASEGTGIIAGG   |
| P0A7W1 | RS5_ECOLI | 30S ribosomal protein S5 VFMQPASEGTGIIAGGA  |
| P0A7W1 | RS5_ECOLI | 30S ribosomal protein S5 VFMQPASEGTGIIAGGA  |

|        |           |                                              |
|--------|-----------|----------------------------------------------|
| P02358 | RS6_ECOLI | 30S ribosomal protein S6 AHYVLmNVEAPQEVID    |
| P02358 | RS6_ECOLI | 30S ribosomal protein S6 AHYVLMNVEAPQEVIDE   |
| P02358 | RS6_ECOLI | 30S ribosomal protein S6 FNDAVIR             |
| P02358 | RS6_ECOLI | 30S ribosomal protein S6 HAVTEASPmVK         |
| P02358 | RS6_ECOLI | 30S ribosomal protein S6 HAVTEASPMVK         |
| P02358 | RS6_ECOLI | 30S ribosomal protein S6 HYEIVFMVHPDQSEQVF   |
| P02358 | RS6_ECOLI | 30S ribosomal protein S6 RQLAYPINK           |
| P02358 | RS6_ECOLI | 30S ribosomal protein S6 YTAAITGAEGK         |
| P02359 | RS7_ECOLI | 30S ribosomal protein S7 <QPALGYLN           |
| P02359 | RS7_ECOLI | 30S ribosomal protein S7 FGSELLAK            |
| P02359 | RS7_ECOLI | 30S ribosomal protein S7 FVNILmVDGK          |
| P02359 | RS7_ECOLI | 30S ribosomal protein S7 FVNILmVDGKK         |
| P02359 | RS7_ECOLI | 30S ribosomal protein S7 FVNILMVDGK          |
| P02359 | RS7_ECOLI | 30S ribosomal protein S7 FVNILMVDGKK         |
| P02359 | RS7_ECOLI | 30S ribosomal protein S7 KSTAESIVYSALETLAQR  |
| P02359 | RS7_ECOLI | 30S ribosomal protein S7 LANELSDAAENK        |
| P02359 | RS7_ECOLI | 30S ribosomal protein S7 LANELSDAAENKGTAVK   |
| P02359 | RS7_ECOLI | 30S ribosomal protein S7 QPALGYLN            |
| P02359 | RS7_ECOLI | 30S ribosomal protein S7 SELEAFEVALENVRPTVE  |
| P02359 | RS7_ECOLI | 30S ribosomal protein S7 SGKSELEAFEVALENVRP  |
| P02359 | RS7_ECOLI | 30S ribosomal protein S7 STAESIVYSALETLAQR   |
| P02359 | RS7_ECOLI | 30S ribosomal protein S7 VGGSTYQVPVEVR       |
| P02359 | RS7_ECOLI | 30S ribosomal protein S7 VGGSTYQVPVEVRPVR    |
| P02359 | RS7_ECOLI | 30S ribosomal protein S7 VGGSTYQVPVEVRPVRR   |
| P02359 | RS7_ECOLI | 30S ribosomal protein S7 WIVEAAR             |
| P0A7W7 | RS8_ECOLI | 30S ribosomal protein S8 <QAGLGGEIICYVA      |
| P0A7W7 | RS8_ECOLI | 30S ribosomal protein S8 AVVESIQR            |
| P0A7W7 | RS8_ECOLI | 30S ribosomal protein S8 EEGFIEDFKVEGDTKPELI |
| P0A7W7 | RS8_ECOLI | 30S ribosomal protein S8 KDELPKVMAGLGIAVV!   |
| P0A7W7 | RS8_ECOLI | 30S ribosomal protein S8 KDELPKVMAGLGIAVVS'  |
| P0A7W7 | RS8_ECOLI | 30S ribosomal protein S8 LKVAIANVLK          |
| P0A7W7 | RS8_ECOLI | 30S ribosomal protein S8 QAGLGGEIICYVA       |
| P0A7W7 | RS8_ECOLI | 30S ribosomal protein S8 SmQDPIADmLTR        |
| P0A7W7 | RS8_ECOLI | 30S ribosomal protein S8 SmQDPIADMLTR        |
| P0A7W7 | RS8_ECOLI | 30S ribosomal protein S8 SMQDPIADmLTR        |
| P0A7W7 | RS8_ECOLI | 30S ribosomal protein S8 SMQDPIADMLTR        |
| P0A7W7 | RS8_ECOLI | 30S ribosomal protein S8 VAIANVLK            |
| P0A7W7 | RS8_ECOLI | 30S ribosomal protein S8 VAIANVLKEEGFIEDFK   |
| P0A7W7 | RS8_ECOLI | 30S ribosomal protein S8 VEGDTKPELELTLK      |
| P0A7W7 | RS8_ECOLI | 30S ribosomal protein S8 VmAGLGIAVVSTSK      |
| P0A7W7 | RS8_ECOLI | 30S ribosomal protein S8 VMAGLGIAVVSTSK      |
| P0A7X3 | RS9_ECOLI | 30S ribosomal protein S9 <QPLELVDMVEK        |
| P0A7X3 | RS9_ECOLI | 30S ribosomal protein S9 AENQYYGTGR          |
| P0A7X3 | RS9_ECOLI | 30S ribosomal protein S9 ALmEYDESLR          |
| P0A7X3 | RS9_ECOLI | 30S ribosomal protein S9 ALmEYDESLRSELR      |
| P0A7X3 | RS9_ECOLI | 30S ribosomal protein S9 ALMEYDESLR          |
| P0A7X3 | RS9_ECOLI | 30S ribosomal protein S9 ALMEYDESLRSELR      |

|        |            |                                                     |
|--------|------------|-----------------------------------------------------|
| P0A7X3 | RS9_ECOLI  | 30S ribosomal protein S9 GGGISGQAGAIR               |
| P0A7X3 | RS9_ECOLI  | 30S ribosomal protein S9 LDLYITVK                   |
| P0A7X3 | RS9_ECOLI  | 30S ribosomal protein S9 QPLELVDmVEK                |
| P0A7X3 | RS9_ECOLI  | 30S ribosomal protein S9 QPLELVDmVEKLDLYIT          |
| P0A7X3 | RS9_ECOLI  | 30S ribosomal protein S9 QPLELVDMVEK                |
| P0A7X3 | RS9_ECOLI  | 30S ribosomal protein S9 SLEQYFGR                   |
| P36929 | RSMB_ECOLI | Ribosomal RNA small subunit ALLQELCFGVLR            |
| P36929 | RSMB_ECOLI | Ribosomal RNA small subunit DSWLALLDEAGmK           |
| P36929 | RSMB_ECOLI | Ribosomal RNA small subunit DSWLALLDEAGMK           |
| P36929 | RSMB_ECOLI | Ribosomal RNA small subunit GFPHADYPDVAVR           |
| P36929 | RSMB_ECOLI | Ribosomal RNA small subunit GLINGVLR                |
| P36929 | RSMB_ECOLI | Ribosomal RNA small subunit ILLDAPCSATGVIR          |
| P36929 | RSMB_ECOLI | Ribosomal RNA small subunit QNLPGAEEGDGFFYAK        |
| P36929 | RSMB_ECOLI | Ribosomal RNA small subunit QQEELLAEFNASDAR         |
| P36929 | RSMB_ECOLI | Ribosomal RNA small subunit TADAELCETGTPEQPGK       |
| P36929 | RSMB_ECOLI | Ribosomal RNA small subunit TGGTLVYATCSVLPEENS      |
| P36929 | RSMB_ECOLI | Ribosomal RNA small subunit TLSQLDWLINK             |
| P36929 | RSMB_ECOLI | Ribosomal RNA small subunit TTHILEVAPEAQVAVDI       |
| P36929 | RSMB_ECOLI | Ribosomal RNA small subunit YPSQWCGEQQFDR           |
| P39406 | RSMC_ECOLI | Ribosomal RNA small subunit ATLAANGVEGEVFNASNV      |
| P39406 | RSMC_ECOLI | Ribosomal RNA small subunit DGLDVGSQLLSTLTPHT       |
| P39406 | RSMC_ECOLI | Ribosomal RNA small subunit FWGEYSVDGLTVK           |
| P39406 | RSMC_ECOLI | Ribosomal RNA small subunit ILFAGDLQDDLPAR          |
| P39406 | RSMC_ECOLI | Ribosomal RNA small subunit IVANAFLPYPDVLDTEFG      |
| P39406 | RSMC_ECOLI | Ribosomal RNA small subunit LTLCDVSAPAVEASR         |
| P39406 | RSMC_ECOLI | Ribosomal RNA small subunit SAEQmLADYAPLNK          |
| P39406 | RSMC_ECOLI | Ribosomal RNA small subunit SAFTPASEVLLR            |
| P39406 | RSMC_ECOLI | Ribosomal RNA small subunit VLDVGCAGVLSVAFAR        |
| P60390 | RSMH_ECOLI | Ribosomal RNA small subunit LILSQLGEEGR             |
| P0AA43 | RSUA_ECOLI | Ribosomal small subunit FIAQQLGVSR                  |
| P0AA43 | RSUA_ECOLI | Ribosomal small subunit TYLVTLESPVADDTAEQF          |
| P0AG86 | SECB_ECOLI | Protein-export protein S9 Ac-SEQNNTMTFQIQ           |
| P0AG86 | SECB_ECOLI | Protein-export protein S9 DISFEAPNAPHVFQK           |
| P0AG86 | SECB_ECOLI | Protein-export protein S9 LDLDTASSQLADDVYEV         |
| P16456 | SELD_ECOLI | Selenide, water dikinase mNIAGASFANIEGVK            |
| P23721 | SERC_ECOLI | Phosphoserine aminotransferase AELLYGVIDNSDFYR      |
| P23721 | SERC_ECOLI | Phosphoserine aminotransferase ALTDFMVEFER          |
| P23721 | SERC_ECOLI | Phosphoserine aminotransferase AQIFNFSSGPmLPAEV     |
| P23721 | SERC_ECOLI | Phosphoserine aminotransferase ASIYNAmPLEGVK        |
| P23721 | SERC_ECOLI | Phosphoserine aminotransferase GQFAAVPLNILGDK       |
| P23721 | SERC_ECOLI | Phosphoserine aminotransferase NIGPAGLTIVIVR        |
| P23721 | SERC_ECOLI | Phosphoserine aminotransferase YCTPNVFDK            |
| P0AEU7 | SKP_ECOLI  | Chaperone protein skp TGVSNTLENEFK                  |
| P0AEU7 | SKP_ECOLI  | Chaperone protein skp TGVSNTLENEFKGR                |
| P0A9K9 | SLYD_ECOLI | FKBP-type peptidyl-prolyl isomerase DLVVSLAYQVR     |
| P0A9K9 | SLYD_ECOLI | FKBP-type peptidyl-prolyl isomerase DVFmGVDELQVGMmR |
| P0A9K9 | SLYD_ECOLI | FKBP-type peptidyl-prolyl isomerase DVFmGVDELQVGMmR |
| P0A9K9 | SLYD_ECOLI | FKBP-type peptidyl-prolyl isomerase DVFMGVDELQVGMmR |

|        |            |                                             |
|--------|------------|---------------------------------------------|
| POA9K9 | SLYD_ECOLI | FKBP-type peptidyl-proly FLAETDQGPVPVEITAVE |
| POA9K9 | SLYD_ECOLI | FKBP-type peptidyl-proly FNVEVVAIR          |
| POA9K9 | SLYD_ECOLI | FKBP-type peptidyl-proly VPKDVFmGVDELQVGI   |
| POA9K9 | SLYD_ECOLI | FKBP-type peptidyl-proly VPKDVFmGVDELQVGI   |
| POAGD3 | SODF_ECOLI | Superoxide dismutase [F AQFTDAAIK           |
| POAGD3 | SODF_ECOLI | Superoxide dismutase [F DALAPHISAETIEYHYGK  |
| POAGD3 | SODF_ECOLI | Superoxide dismutase [F HHQTYVTNLNLIK       |
| POAGD3 | SODF_ECOLI | Superoxide dismutase [F NFGSGWTWLVK         |
| POAGD3 | SODF_ECOLI | Superoxide dismutase [F SFELPALPYAK         |
| POAGD3 | SODF_ECOLI | Superoxide dismutase [F SLEEIIR             |
| POAGD3 | SODF_ECOLI | Superoxide dismutase [F VAEAIAASFGSFADFK    |
| P00448 | SODM_ECOLI | Superoxide dismutase [N DFGSVDNFK           |
| P00448 | SODM_ECOLI | Superoxide dismutase [N EFWNVVNWDEAAAR      |
| P00448 | SODM_ECOLI | Superoxide dismutase [N FGSGWAWLVLK         |
| P68191 | SRA_ECOLI  | Stationary-phase-induce SSVVNNPTGR          |
| POA836 | SUCC_ECOLI | Succinyl-CoA ligase [ADP AVLVNIFGGIVR       |
| POA836 | SUCC_ECOLI | Succinyl-CoA ligase [ADP GLTDAAQQVVAAVEGK   |
| POAGE9 | SUCD_ECOLI | Succinyl-CoA ligase [ADP GGTTHLGLPVFNTVR    |
| POAGE9 | SUCD_ECOLI | Succinyl-CoA ligase [ADP GTADEKFAALEAAGVK   |
| P21889 | SYD_ECOLI  | Aspartyl-tRNA synthetas FGFLLDALK           |
| PO4805 | SYE_ECOLI  | Glutamyl-tRNA synthetas FAPSPTGYLHVGGAR     |
| PO4805 | SYE_ECOLI  | Glutamyl-tRNA synthetas TALYSWLFAR          |
| P00960 | SYGA_ECOLI | Glycyl-tRNA synthetase a ELGPEPmAAAYVQPSR   |
| P00960 | SYGA_ECOLI | Glycyl-tRNA synthetase a ELGPEPMAAAYVQPSR   |
| P00960 | SYGA_ECOLI | Glycyl-tRNA synthetase a TFQGLLTLQDYWAR     |
| P00956 | SYI_ECOLI  | Isoleucyl-tRNA synthetas ANDIVVALLQEK       |
| P00956 | SYI_ECOLI  | Isoleucyl-tRNA synthetas AYEAYDFHEVVQR      |
| P00956 | SYI_ECOLI  | Isoleucyl-tRNA synthetas GAELELLR           |
| P00956 | SYI_ECOLI  | Isoleucyl-tRNA synthetas IGVTDYITILGTVK     |
| POA8N3 | SYK1_ECOLI | Lysyl-tRNA synthetase ASFVTLQDVGGR          |
| POA8N5 | SYK2_ECOLI | Lysyl-tRNA synthetase, h ALAESIGITVEK       |
| POA8N5 | SYK2_ECOLI | Lysyl-tRNA synthetase, h DSLPEGVYNDQFK      |
| POA8N5 | SYK2_ECOLI | Lysyl-tRNA synthetase, h GANEAIDFNDEL       |
| POA8N5 | SYK2_ECOLI | Lysyl-tRNA synthetase, h WDLGDIIGAR         |
| POA8N5 | SYK2_ECOLI | Lysyl-tRNA synthetase, h YLDLIANDK          |
| POA8N5 | SYK2_ECOLI | Lysyl-tRNA synthetase, h YRPETDmADLDNFDA/   |
| P00962 | SYQ_ECOLI  | Glutaminyl-tRNA synthet EGYFCLDSR           |
| P00962 | SYQ_ECOLI  | Glutaminyl-tRNA synthet LNLEYTVMSK          |
| P00962 | SYQ_ECOLI  | Glutaminyl-tRNA synthet SVEENLALFEK         |
| POA8L1 | SYS_ECOLI  | Seryl-tRNA synthetase AELDALQAEIR           |
| POA8L1 | SYS_ECOLI  | Seryl-tRNA synthetase EFDFEVR               |
| POA8L1 | SYS_ECOLI  | Seryl-tRNA synthetase VLQLLGLPYR            |
| POA8M3 | SYT_ECOLI  | Threonyl-tRNA synthetas PVITLPDGSQR         |
| P07118 | SYV_ECOLI  | Valyl-tRNA synthetase AE mNIAPGKPLELLLR     |
| P07118 | SYV_ECOLI  | Valyl-tRNA synthetase FTLAALASTGR           |
| P07118 | SYV_ECOLI  | Valyl-tRNA synthetase YVILPLVNR             |
| POA867 | TALA_ECOLI | Transaldolase A AAGLSQYEHLLIDDAIAW/         |
| POA867 | TALA_ECOLI | Transaldolase A ACAEAGVFLISPFGVR            |

|        |            |                          |                               |
|--------|------------|--------------------------|-------------------------------|
| POA867 | TALA_ECOLI | Transaldolase A          | KLEDLLAAKL                    |
| POA867 | TALA_ECOLI | Transaldolase A          | LTIAPNLLK                     |
| POA867 | TALA_ECOLI | Transaldolase A          | QFTTVVADSGDIESIR              |
| POA870 | TALB_ECOLI | Transaldolase B          | AQQIVDATDKLAVNIGLI            |
| POA870 | TALB_ECOLI | Transaldolase B          | ELAESEGAIER                   |
| POA870 | TALB_ECOLI | Transaldolase B          | KLIDDAVAWAK                   |
| POA870 | TALB_ECOLI | Transaldolase B          | LASTWQGIR                     |
| POA870 | TALB_ECOLI | Transaldolase B          | LAVNIGLEILK                   |
| POA870 | TALB_ECOLI | Transaldolase B          | LIDDAVAWAK                    |
| POA870 | TALB_ECOLI | Transaldolase B          | LTIAPALLK                     |
| POA870 | TALB_ECOLI | Transaldolase B          | LYQPQDATTNP <del>SLILNA</del> |
| POA870 | TALB_ECOLI | Transaldolase B          | mIGDLL                        |
| POA870 | TALB_ECOLI | Transaldolase B          | NIGEILELAGCDR                 |
| POA870 | TALB_ECOLI | Transaldolase B          | QYTTVVADTGDIAAmK              |
| POA870 | TALB_ECOLI | Transaldolase B          | QYTTVVADTGDIAAMK              |
| POAGL2 | TDCF_ECOLI | Protein tdcF             | DVKLEIEAIAVR                  |
| POAGL2 | TDCF_ECOLI | Protein tdcF             | LEIEAIAVR                     |
| POAGG2 | TESB_ECOLI | Acyl-CoA thioesterase 2  | KPIIYDVETLR                   |
| POAGG2 | TESB_ECOLI | Acyl-CoA thioesterase 2  | QVFGGQVVGQALYAAK              |
| POAA25 | THIO_ECOLI | Thioredoxin-1            | GIPTLLLFK                     |
| POAA25 | THIO_ECOLI | Thioredoxin-1            | GQLKEFLDANLA                  |
| POA850 | TIG_ECOLI  | Trigger factor           | ANDIDVPAALIDSEIDVLI           |
| POA850 | TIG_ECOLI  | Trigger factor           | ANDIDVPAALIDSEIDVLI           |
| POA850 | TIG_ECOLI  | Trigger factor           | ASDFVLAMGQGR                  |
| POA850 | TIG_ECOLI  | Trigger factor           | ELPELTAEFIK                   |
| POA850 | TIG_ECOLI  | Trigger factor           | FGVEDGSVEGLRAEVR              |
| POA850 | TIG_ECOLI  | Trigger factor           | FGVEDGSVEGLR                  |
| POA850 | TIG_ECOLI  | Trigger factor           | INPAGAPTYVPGEYK               |
| POA850 | TIG_ECOLI  | Trigger factor           | NFIDAIKEK                     |
| POA850 | TIG_ECOLI  | Trigger factor           | NVALEEQAVEAVLAK               |
| POA850 | TIG_ECOLI  | Trigger factor           | QDVLGDLMSR                    |
| POA850 | TIG_ECOLI  | Trigger factor           | VVVGLLLGEVIR                  |
| P27302 | TKT1_ECOLI | Transketolase 1          | AINEDAAGNYIHYGVR              |
| P27302 | TKT1_ECOLI | Transketolase 1          | QDGPTALILSR                   |
| P27302 | TKT1_ECOLI | Transketolase 1          | VAVEAGIADYWYK                 |
| P27302 | TKT1_ECOLI | Transketolase 1          | VVSMPSTDAFDKQDAA'             |
| POA853 | TNAA_ECOLI | Tryptophanase            | ATY <del>T</del> QTHmDFIIEAFK |
| POA853 | TNAA_ECOLI | Tryptophanase            | AVEIGSFLGR                    |
| POA853 | TNAA_ECOLI | Tryptophanase            | EAEYKDWTIEQITR                |
| POA853 | TNAA_ECOLI | Tryptophanase            | FAENAYFIK                     |
| POA853 | TNAA_ECOLI | Tryptophanase            | GAEQIYIPVLIK                  |
| POA853 | TNAA_ECOLI | Tryptophanase            | GLTFTYEPK                     |
| POA853 | TNAA_ECOLI | Tryptophanase            | GNFDLEGLER                    |
| POA853 | TNAA_ECOLI | Tryptophanase            | LLPHIPADQFPAQALACE            |
| POA853 | TNAA_ECOLI | Tryptophanase            | SYVALAESVK                    |
| POA853 | TNAA_ECOLI | Tryptophanase            | YADMLAMSAK                    |
| P06694 | TNP2_ECOLX | Transposase for transpo: | LFNAAK                        |
| P13694 | TNP7_ECOLX | Transposase for transpo: | <QRLDELLK                     |



|        |             |                            |                     |
|--------|-------------|----------------------------|---------------------|
| P0A855 | TOLB_ECOLI  | Protein tolB               | LAYVTFESGR          |
| P06612 | TOP1_ECOLI  | DNA topoisomerase 1        | APLVEELYR           |
| P0A862 | TPX_ECOLI   | Thiol peroxidase           | AQTFTLVAK           |
| P0A862 | TPX_ECOLI   | Thiol peroxidase           | DLSDVTLGQFAGK       |
| P0A862 | TPX_ECOLI   | Thiol peroxidase           | FCGAEGLNNVITLSTFR   |
| P0A862 | TPX_ECOLI   | Thiol peroxidase           | NAEFLQAYGVAIADGPLI  |
| P0A862 | TPX_ECOLI   | Thiol peroxidase           | SQTVHFQGNPVTVANSI   |
| P0A862 | TPX_ECOLI   | Thiol peroxidase           | VLNIFPSIDTGVCAASVR  |
| P28904 | TREC_ECOLI  | Trehalose-6-phosphate h    | DADELLAILASK        |
| P28904 | TREC_ECOLI  | Trehalose-6-phosphate h    | LDVVNLISKDPR        |
| P28904 | TREC_ECOLI  | Trehalose-6-phosphate h    | NDGRDADELLAILASK    |
| P28904 | TREC_ECOLI  | Trehalose-6-phosphate h    | VCEFWADR            |
| P0A9P4 | TRXB_ECOLI  | Thioredoxin reductase      | ANLQPVLITGmEK       |
| P0A9P4 | TRXB_ECOLI  | Thioredoxin reductase      | LLILGSGPAGYTAADVYAA |
| P0A9P4 | TRXB_ECOLI  | Thioredoxin reductase      | QAITSAGTGCMAALDAE   |
| P32132 | TYP_A_ECOLI | GTP-binding protein typA   | AVAFALFGLQDR        |
| P12758 | UDP_ECOLI   | Uridine phosphorylase      | IGTTGAIQPHINVGDLV   |
| P12758 | UDP_ECOLI   | Uridine phosphorylase      | NDLQGATLAIVPGDPDR   |
| P12758 | UDP_ECOLI   | Uridine phosphorylase      | NDLQGATLAIVPGDPDR   |
| P12758 | UDP_ECOLI   | Uridine phosphorylase      | SDVFHLGLTK          |
| P12758 | UDP_ECOLI   | Uridine phosphorylase      | SIGATTHVGVTASSDTFY  |
| P0A8F0 | UPP_ECOLI   | Uracil phosphoribosyltra   | VLVLVAAPEGIAALEK    |
| POAED0 | USPA_ECOLI  | Universal stress protein / | AYKHILIAVDLSPESK    |
| POAED0 | USPA_ECOLI  | Universal stress protein / | HILIAVDLSPESK       |
| POAED0 | USPA_ECOLI  | Universal stress protein / | QLINTVHVDmLIVPLRD   |
| P39177 | USPG_ECOLI  | Universal stress protein ( | HANLPVLVVR          |
| P39177 | USPG_ECOLI  | Universal stress protein ( | LQTmVSHFTIDPSR      |
| P39177 | USPG_ECOLI  | Universal stress protein ( | NPSISTHLLGSNASSVIR  |
| P0A8G6 | WRBA_ECOLI  | Flavoprotein wrbA          | <QPSQEELSIAR        |
| P0A8G6 | WRBA_ECOLI  | Flavoprotein wrbA          | GGTPYGATTIAGGDGSR   |
| P0A8G6 | WRBA_ECOLI  | Flavoprotein wrbA          | RVPETmPPQLFEK       |
| P0A8G6 | WRBA_ECOLI  | Flavoprotein wrbA          | TFLDQTGGLWASGALYC   |
| P0A8G6 | WRBA_ECOLI  | Flavoprotein wrbA          | TQTAPVATPQELADYDA   |
| P0A8G6 | WRBA_ECOLI  | Flavoprotein wrbA          | YQGEYVAGLAVK        |
| P0A9M5 | XGPT_ECOLI  | Xanthine phosphoribosyl    | GGLVPGALLAR         |
| P77300 | YAGI_ECOLI  | Uncharacterized HTH-tyr    | EALMSALAQTR         |
| P77300 | YAGI_ECOLI  | Uncharacterized HTH-tyr    | VIAALSSTLTSR        |
| P75691 | YAHK_ECOLI  | Uncharacterized zinc-tyr   | SPEVFNLI mK         |
| P0A8E7 | YAJQ_ECOLI  | UPF0234 protein yajQ       | GGDLGQPQFK          |
| P0A8E7 | YAJQ_ECOLI  | UPF0234 protein yajQ       | GIEGSSLDVPENIVHSGK  |
| P0A8E7 | YAJQ_ECOLI  | UPF0234 protein yajQ       | NVEASFELNDASK       |
| P0A8E7 | YAJQ_ECOLI  | UPF0234 protein yajQ       | PSFDIVSEVDLQEAR     |
| P0A8E7 | YAJQ_ECOLI  | UPF0234 protein yajQ       | SRDDLQAV mAMVR      |
| P0A8E7 | YAJQ_ECOLI  | UPF0234 protein yajQ       | TWFVEAK             |
| P0A8E7 | YAJQ_ECOLI  | UPF0234 protein yajQ       | VLSESDFQVNQLLDILR   |
| P30177 | YBIB_ECOLI  | Uncharacterized protein    | LATPFAEGEALR        |
| P75829 | YBJX_ECOLI  | Uncharacterized protein    | LQVEQIIAVSNETHIYR   |
| P75829 | YBJX_ECOLI  | Uncharacterized protein    | TMFIGGLQGAK         |

|        |            |                                 |                     |
|--------|------------|---------------------------------|---------------------|
| P21367 | YCAC_ECOLI | Uncharacterized protein         | NNVLALGDLAK         |
| P75838 | YCAO_ECOLI | UPF0142 protein ycaO            | Ac-TQTFIPGKDAALED   |
| P75838 | YCAO_ECOLI | UPF0142 protein ycaO            | AALASALGEYFER       |
| P75838 | YCAO_ECOLI | UPF0142 protein ycaO            | DAALEDSIAR          |
| P75838 | YCAO_ECOLI | UPF0142 protein ycaO            | ELLGLATGSDNGWYTLR   |
| P75838 | YCAO_ECOLI | UPF0142 protein ycaO            | GICGLPFTR           |
| P75838 | YCAO_ECOLI | UPF0142 protein ycaO            | IIAESISLPEIPADVLAR  |
| P75838 | YCAO_ECOLI | UPF0142 protein ycaO            | IIVPGmSDIYPAEDLWL   |
| P75838 | YCAO_ECOLI | UPF0142 protein ycaO            | KAALASALGEYFER      |
| P75838 | YCAO_ECOLI | UPF0142 protein ycaO            | TQTFIPGKDAALEDSIAR  |
| P75838 | YCAO_ECOLI | UPF0142 protein ycaO            | TVTELLQGR           |
| P75838 | YCAO_ECOLI | UPF0142 protein ycaO            | VQGLSEVFER          |
| P75838 | YCAO_ECOLI | UPF0142 protein ycaO            | VRELLGLATGSDNGWYT   |
| P75838 | YCAO_ECOLI | UPF0142 protein ycaO            | WFPLTENDDVPEGLLDC   |
| P75838 | YCAO_ECOLI | UPF0142 protein ycaO            | WFPLTENDDVPEGLLDC   |
| P22525 | YCBB_ECOLI | Probable L,D-transpeptic        | AGVLALNIQR          |
| P22525 | YCBB_ECOLI | Probable L,D-transpeptic        | DWLNVTPAQR          |
| P75849 | YCBL_ECOLI | Uncharacterized protein         | LLISGDVIFK          |
| P0AB28 | YCED_ECOLI | Uncharacterized protein         | VKLPLTLDPVR         |
| P0A729 | YCEF_ECOLI | Maf-like protein yceF           | LILASTSPWR          |
| P0A729 | YCEF_ECOLI | Maf-like protein yceF           | SEFGITLFR           |
| P27431 | YCFD_ECOLI | Uncharacterized protein         | ELISGFADYVLQR       |
| P27431 | YCFD_ECOLI | Uncharacterized protein         | QWFGEFISQSR         |
| P0A8L7 | YCIU_ECOLI | UPF0263 protein yciU            | LCHIIWRE            |
| P64463 | YDFZ_ECOLI | Putative selenoprotein yI       | ILSIDTEGLTAEQIRR    |
| P77552 | YDHQ_ECOLI | Uncharacterized protein         | AENTVVTGAGWLK       |
| P77552 | YDHQ_ECOLI | Uncharacterized protein         | LGTDGLQLYSSGK       |
| P0ACY1 | YDJA_ECOLI | Putative NAD(P)H nitroreductase | APLIITVVAK          |
| P0ACY1 | YDJA_ECOLI | Putative NAD(P)H nitroreductase | LAEPAPTGEQLQNILR    |
| P0ACY1 | YDJA_ECOLI | Putative NAD(P)H nitroreductase | MDALELLINR          |
| P64483 | YEAK_ECOLI | Uncharacterized protein         | IAQPELVNFR          |
| P64483 | YEAK_ECOLI | Uncharacterized protein         | LIALLSQEGADFR       |
| P33355 | YEHS_ECOLI | Uncharacterized protein         | TDDILAILTEQQFR      |
| P67095 | YFCE_ECOLI | Phosphodiesterase yfcE          | GEIFHFNPGSVSIPK     |
| P0AD33 | YFCZ_ECOLI | UPF0381 protein yfcZ            | AEAEQTLAALTEK       |
| P76550 | YFFS_ECOLI | Uncharacterized protein         | DAIIDDLKAR          |
| P76550 | YFFS_ECOLI | Uncharacterized protein         | EAVAERDAIIDDLKAR    |
| P76550 | YFFS_ECOLI | Uncharacterized protein         | EAVAERDAIIDDLK      |
| P76550 | YFFS_ECOLI | Uncharacterized protein         | GLISVEQEI           |
| P76550 | YFFS_ECOLI | Uncharacterized protein         | IAELEAALANK         |
| P76550 | YFFS_ECOLI | Uncharacterized protein         | ITVLDNDGNRKPISNGAIF |
| P76550 | YFFS_ECOLI | Uncharacterized protein         | LITLLPNWIDK         |
| P76550 | YFFS_ECOLI | Uncharacterized protein         | LITLLPNWIDKLGDE     |
| P76550 | YFFS_ECOLI | Uncharacterized protein         | QVPAEAEEmGGEKVEE    |
| P0AGJ5 | YFIF_ECOLI | Uncharacterized tRNA/rf         | AWFIQSVTPR          |
| P0AGJ5 | YFIF_ECOLI | Uncharacterized tRNA/rf         | GVVVQDAALLESAAIR    |
| P0AGJ5 | YFIF_ECOLI | Uncharacterized tRNA/rf         | mVLVLGQEYEGLPDAI    |
| P0AGJ5 | YFIF_ECOLI | Uncharacterized tRNA/rf         | MVLVLGQEYEGLPDAAF   |

|        |            |                                             |
|--------|------------|---------------------------------------------|
| P0AGJ5 | YFIF_ECOLI | Uncharacterized tRNA/rf TAEGGAEHVQPITGDNI'  |
| P0AGJ5 | YFIF_ECOLI | Uncharacterized tRNA/rf VYGENACQALFQSRPEA   |
| P0ADE8 | YGFZ_ECOLI | tRNA-modifying protein · AALANLFSSELPK      |
| P0ADE8 | YGFZ_ECOLI | tRNA-modifying protein · AALANLFSSELPK      |
| P0ADE8 | YGFZ_ECOLI | tRNA-modifying protein · ALWLLAGSASR        |
| P0ADE8 | YGFZ_ECOLI | tRNA-modifying protein · DGDGFAWIER         |
| P0ADE8 | YGFZ_ECOLI | tRNA-modifying protein · LPEAGEDLELK        |
| P0ADE8 | YGFZ_ECOLI | tRNA-modifying protein · VLLGVAGFQAR        |
| P0ADU2 | YGIN_ECOLI | Probable quinol monoox AYSEAVKGDVLEMNIR     |
| P0ADU2 | YGIN_ECOLI | Probable quinol monoox mLTVIAEIR            |
| P0ADU2 | YGIN_ECOLI | Probable quinol monoox MLTVIAEIR            |
| P37613 | YHHK_ECOLI | Uncharacterized protein GVGQYLLEEVLR        |
| P37613 | YHHK_ECOLI | Uncharacterized protein VTLSGTEGALDSL       |
| P32162 | YIIS_ECOLI | UPF0381 protein yjiS FFATREEAESFmTK         |
| P0ACU7 | YJDC_ECOLI | HTH-type transcriptional FWPDKEAILYDALR     |
| P0ACU7 | YJDC_ECOLI | HTH-type transcriptional LLELQGIANTTLEmVAEI |
| P0ACU7 | YJDC_ECOLI | HTH-type transcriptional YLSQQIDVWR         |
| P0AF90 | YJGD_ECOLI | Uncharacterized protein ANPEQLEEQRRETR      |
| P0AF93 | YJGF_ECOLI | UPF0076 protein yjgF AIVEAAGLK              |
| P0AF93 | YJGF_ECOLI | UPF0076 protein yjgF AIVEAAGLKVGDIVK        |
| P0AF93 | YJGF_ECOLI | UPF0076 protein yjgF DLNDFATVNATYEAFFTI     |
| P0AF93 | YJGF_ECOLI | UPF0076 protein yjgF DVKIEIEIAIVR           |
| P0AF93 | YJGF_ECOLI | UPF0076 protein yjgF DVKIEIEIAIVRR          |
| P0AF93 | YJGF_ECOLI | UPF0076 protein yjgF IEIEIAIVR              |
| P0AF93 | YJGF_ECOLI | UPF0076 protein yjgF QSLDNVKAIVEAAGLKV      |
| P0AF93 | YJGF_ECOLI | UPF0076 protein yjgF TGEVPADVAAQAR          |
| P39353 | YJHC_ECOLI | Uncharacterized oxidore TPLWLASLIR          |
| P39356 | YJHU_ECOLI | Uncharacterized transcri ILGISLAQLR         |
| P76116 | YNCE_ECOLI | Uncharacterized protein ELVADDATNTVYISGIGK  |
| P76116 | YNCE_ECOLI | Uncharacterized protein ESVIWVVDGGNK        |
| P76116 | YNCE_ECOLI | Uncharacterized protein LYTTNADGELITIDTADN  |
| P76116 | YNCE_ECOLI | Uncharacterized protein VAAPESLAVLFNPAR     |
| P0AEB7 | YOAB_ECOLI | UPF0076 protein yoaB AWDAAWVVAGHAPVR        |
| P0AEB7 | YOAB_ECOLI | UPF0076 protein yoaB SSILDATIFLADKNDFAAr    |
| P0A8W5 | YQGE_ECOLI | UPF0301 protein yqgE GFILHTPPSNFASSIR       |
| P0A8W5 | YQGE_ECOLI | UPF0301 protein yqgE LIGVDILTmPGVAGHA       |
| P0A9W9 | YRDA_ECOLI | Protein yrdA LADDVGIWPLVVIR                 |
| P0A9W9 | YRDA_ECOLI | Protein yrdA LESGYLYLGSPVK                  |
| P0A9W9 | YRDA_ECOLI | Protein yrdA VmIDDSSVVIGDVR                 |

| Modified Sequence   | Stationary 1st Control | Stationary 2nd Control | Stationary 1st Exp |
|---------------------|------------------------|------------------------|--------------------|
| NH2-AAVLPANLIQAQI*  | Stationary 1st Control |                        | Stationary 1st Exp |
| NH2-EAYELVAPILTK-C* | Stationary 1st Control |                        | Stationary 1st Exp |
| NH2-EFVESLETPE-COC* |                        |                        | Stationary 1st Exp |
| NH2-GYTVSIFNR-COO*  | Stationary 1st Control |                        | Stationary 1st Exp |
| NH2-IAAVAEDGEPC<C*  | Stationary 1st Control |                        |                    |
| NH2-IVSYAQGFSQLR-(* | Stationary 1st Control |                        | Stationary 1st Exp |
| NH2-VLSGPQAQPAGC*   |                        |                        | Stationary 1st Exp |
| NH2-TASLITVFSVSEDC* |                        |                        | Stationary 1st Exp |
| NH2-WAADIHITPDGR*   |                        |                        | Stationary 1st Exp |
| NH2-YLYVGVPRPEFR-C* |                        |                        | Stationary 1st Exp |
| NH2-AIWEQELTDM<N*   |                        |                        | Stationary 1st Exp |
| NH2-QLFVNTLQEK-CC*  | Stationary 1st Control |                        |                    |
| NH2-SVFNAGLEVR-C*   | Stationary 1st Control |                        | Stationary 1st Exp |
| NH2-VGAC<Cmm*>TL*   | Stationary 1st Control |                        |                    |
| NH2-VWVSNPSWPNH*    |                        |                        | Stationary 1st Exp |
| NH2-IGYPVIK-COOH*   | Stationary 1st Control |                        |                    |
| NH2-NALQELIIDGIK-C* |                        |                        | Stationary 1st Exp |
| NH2-SGFIFIGPK-COOH* |                        |                        | Stationary 1st Exp |
| NH2-VVEEAPAPGITPE*  |                        |                        | Stationary 1st Exp |
| NH2-ADQIQWSAGIEP*   |                        |                        | Stationary 1st Exp |
| NH2-AM<Mox>IEAGA*   |                        |                        | Stationary 1st Exp |
| NH2-GSVNPEC<Cmm*    |                        |                        | Stationary 1st Exp |
| NH2-KGYINSLGALTGG*  |                        |                        | Stationary 1st Exp |
| NH2-LAADVTGVPTLLV*  |                        |                        | Stationary 1st Exp |
| NH2-LLAYNC<Cmm*>*   |                        |                        | Stationary 1st Exp |
| NH2-RADQIQWSAGIE*   |                        |                        | Stationary 1st Exp |
| NH2-TQQIEELQKEWT*   |                        |                        | Stationary 1st Exp |
| NH2-WEGITRPYSAED\*  |                        |                        | Stationary 1st Exp |
| NH2-EGTRPAVVIPTNE*  |                        |                        | Stationary 1st Exp |
| NH2-ESGLLGLTEVTSD*  |                        |                        | Stationary 1st Exp |
| NH2-LGVLFGEVDHER-*  | Stationary 1st Control |                        | Stationary 1st Exp |
| NH2-LVLVLNC<Cmm**   |                        |                        | Stationary 1st Exp |
| NH2-SDTYGWQEDSTY*   |                        |                        | Stationary 1st Exp |
| NH2-VLLENLLR-COOH*  | Stationary 1st Control |                        | Stationary 1st Exp |
| NH2-VVIAESFER-COOI* |                        |                        | Stationary 1st Exp |
| NH2-AGFLAAIAK-COO*  |                        |                        | Stationary 1st Exp |
| NH2-EGIEPDQPGVVGI*  |                        |                        | Stationary 1st Exp |
| NH2-GFPLAYVGDVVG*   |                        |                        | Stationary 1st Exp |
| NH2-LWVAPPTR-COO*   |                        |                        |                    |
| NH2-YLNFNQLSQYTEK*  |                        |                        | Stationary 1st Exp |
| NH2-M<Mox>IDTTLPI*  |                        |                        | Stationary 1st Exp |
| NH2-VAFENIEDAAR-C*  |                        |                        | Stationary 1st Exp |
| NH2-EGEATLAPSLDLV*  | Stationary 1st Control |                        | Stationary 1st Exp |
| NH2-IKYAM<Mox>IGI*  | Stationary 1st Control |                        | Stationary 1st Exp |
| NH2-IKYAMIGDPTGAL*  |                        |                        | Stationary 1st Exp |
| NH2-LGVDVYAVSTDTI*  | Stationary 1st Control |                        | Stationary 1st Exp |
| NH2-NFDNM<Mox>RI*   |                        |                        | Stationary 1st Exp |

|                         |                        |                        |
|-------------------------|------------------------|------------------------|
| NH2-NGEFIEITEK-COC *    |                        | Stationary 1st Exp     |
| NH2-NGEFIEITEKDTEC *    | Stationary 1st Control | Stationary 1st Exp     |
| NH2-WKEGEATLAPSLI *     |                        | Stationary 1st Exp     |
| NH2-WKEGEATLAPSLI *     |                        | Stationary 1st Exp     |
| NH2-YAM<Mox>IGDP *      | Stationary 1st Control | Stationary 1st Exp     |
| NH2-YAMIGDPTGALTI *     |                        | Stationary 1st Exp     |
| NH2-ASLSAFDYLR-CO *     |                        | Stationary 1st Exp     |
| NH2-GVFAAGDC<Cmr *      |                        | Stationary 1st Exp     |
| NH2-AFQELNAIDVL-C *     | Stationary 1st Control | Stationary 1st Exp     |
| NH2-ANEAYLQGQLGN *      |                        | Stationary 1st Exp     |
| NH2-APVIVQFSNGGA *      | Stationary 1st Control |                        |
| NH2-IFDFVKPGVITGDI *    |                        | Stationary 1st Exp     |
| NH2-SKIFDFVKPGVITG *    |                        | Stationary 1st Exp     |
| NH2-VKAPVIVQFSNGC *     | Stationary 1st Control | Stationary 1st Exp     |
| #Gln->pyro-Glu (N-ter * |                        | Stationary 1st Exp     |
| NH2-AGGM<Mox>GLI *      |                        | Stationary 1st Exp     |
| NH2-AGGMGLILGR-C *      |                        | Stationary 1st Exp     |
| NH2-AGLINSGGAAGG *      |                        | Stationary 1st Exp     |
| NH2-AHELGM<Mox>\ *      |                        | Stationary 1st Exp     |
| NH2-AINYGYTDDR-CC *     |                        | Stationary 1st Exp     |
| NH2-AINYGYTDDRVS *      |                        | Stationary 1st Exp     |
| NH2-C<Cmm*>M<Mc *       |                        | Stationary 1st Exp     |
| NH2-DGVDYHVSADLT *      |                        | Stationary 1st Exp     |
| NH2-IPFLVK-COOH *       |                        |                        |
| NH2-LAGTGYSILPVD *      |                        |                        |
| NH2-LINAVQDVYLDSK *     |                        | Stationary 1st Exp     |
| NH2-LINAVQDVYLDSK *     |                        |                        |
| NH2-LTSENPIDLVR-CC *    |                        | Stationary 1st Exp     |
| NH2-QIEEISAAFER-CO *    |                        | Stationary 1st Exp     |
| NH2-RAGGMGLILGR-C *     |                        |                        |
| NH2-RQIEEISAAFER-C *    |                        |                        |
| NH2-TDIAQLLGK-COO *     |                        | Stationary 1st Exp     |
| NH2-TDIAQLLGKADN *      |                        | Stationary 1st Exp     |
| NH2-VM<Mox>IDNNF *      |                        |                        |
| NH2-VMIDNNRPPAVL *      |                        | Stationary 1st Exp     |
| NH2-YQLANC<Cmm*> *      |                        | Stationary 1st Exp     |
| NH2-YQLANC<Cmm*> *      |                        | Stationary 1st Exp     |
| NH2-FC<Cmm*>PTGC *      | Stationary 1st Control | Stationary 1st Exp     |
| NH2-TSAESILTTGPVVF *    |                        | Stationary 1st Exp     |
| NH2-ELVATLTELCCm *      | Stationary 1st Control |                        |
| NH2-ELVATLTELCCm *      | Stationary 1st Control |                        |
| NH2-FDEVGNLYGR-CC *     | Stationary 1st Control | Stationary 2nd Control |
| NH2-LLYSPEWLETQQ *      | Stationary 1st Control |                        |
| NH2-M<Mox>GDPLVL *      | Stationary 1st Control | Stationary 2nd Control |
| NH2-MGDPLVLTFGK-C *     | Stationary 1st Control |                        |
| NH2-NIFGLANPDDVR *      | Stationary 1st Control | Stationary 2nd Control |
| NH2-TNITDLAEGVK-C *     | Stationary 1st Control | Stationary 2nd Control |
| NH2-VMHSGAGHDAQ *       | Stationary 1st Control |                        |



|                      |                        |                                              |
|----------------------|------------------------|----------------------------------------------|
| NH2-VPTC<Cmm*>M·*    | Stationary 1st Control |                                              |
| NH2-DISTALGLK-COOI*  |                        |                                              |
| NH2-DVLSVAGPFM<N*    |                        |                                              |
| NH2-FVSQGELVR-COC*   |                        |                                              |
| NH2-GIAILQYLEK-COC*  |                        |                                              |
| NH2-LTEDRFVSQGELV*   |                        | Stationary 1st Exp                           |
| NH2-NGNEAVLIGQLE(*   |                        |                                              |
| NH2-ALIDC<Cmm*>YI*   | Stationary 1st Control | Stationary 1st Exp                           |
| NH2-DGEIVQYVPFDKF*   |                        | Stationary 1st Exp                           |
| NH2-TDPGPAFDWAR-*    |                        | Stationary 1st Exp                           |
| NH2-FVEAEGFSVVR-C*   |                        |                                              |
| NH2-ITQESLYLALR-CO*  |                        | Stationary 1st Exp                           |
| NH2-LIEPLIR-COOH*    | Stationary 1st Control | Stationary 1st Exp                           |
| NH2-QGITSYSLVPPFGI*  |                        | Stationary 1st Exp                           |
| NH2-SIQDYPKPGILFR-*  |                        | Stationary 1st Exp                           |
| NH2-VLVVDDLLATGG~*   |                        | Stationary 1st Exp                           |
| NH2-LILPLAIGK-COOH*  |                        | Stationary 1st Exp                           |
| NH2-DLGAVFLVGIGG†*   |                        | Stationary 1st Exp                           |
| NH2-LGLIEVQAPILSR-(* |                        | Stationary 1st Exp                           |
| NH2-SVFDLATAAK-C(*   | Stationary 1st Control |                                              |
| NH2-YALC<Cmm*>EL'*   |                        | Stationary 1st Exp                           |
| NH2-GYLPENLFAPAPC*   |                        |                                              |
| NH2-ADAPLIQWDATS*    | Stationary 1st Control | Stationary 1st Exp                           |
| NH2-AVLAEKADAPLIQ*   |                        | Stationary 1st Exp                           |
| NH2-EAHALRDYLPDAF*   |                        | Stationary 1st Exp                           |
| NH2-QFM<Mox>NELM*    | Stationary 1st Control | Stationary 1st Exp                           |
| NH2-TLLM<Mox>DEQ*    |                        | Stationary 1st Exp                           |
| NH2-TPLSNFNVGAIAR*   | Stationary 1st Control | Stationary 1st Exp                           |
| NH2-SAGGIVLTGSAAA*   |                        | Stationary 1st Exp                           |
| NH2-VGDIVIFNDGYGV*   | Stationary 1st Control | Stationary 1st Exp                           |
| NH2-AAVEEGVVAGGC*    | Stationary 1st Control | Stationary 2nd Control<br>Stationary 1st Exp |
| NH2-AIAQVGTISANSD*   |                        | Stationary 2nd Control                       |
| NH2-ANDAAGDGTTTA'*   | Stationary 1st Control | Stationary 1st Exp                           |
| NH2-EIELEDKFENM<N*   |                        | Stationary 1st Exp                           |
| NH2-EM<Mox>LPVLE/    |                        | Stationary 1st Exp                           |
| NH2-GVNVLADAVK-C(*   |                        | Stationary 2nd Control                       |
| NH2-QIVLNC<Cmm*>*    |                        | Stationary 1st Exp                           |
| NH2-VVINKDTTTIIDG\*  |                        | Stationary 1st Exp                           |
| NH2-GTLGQDVIDIR-C(*  |                        |                                              |
| NH2-AAGATTANITQAI*   |                        | Stationary 1st Exp                           |
| NH2-AIDLIDEAASSIR-C* |                        | Stationary 1st Exp                           |
| NH2-ALANFM<Mox>F*    |                        | Stationary 1st Exp                           |
| NH2-GELHC<Cmm*>v*    |                        | Stationary 1st Exp                           |
| NH2-GYEIHISDEALK-C*  |                        | Stationary 1st Exp                           |
| NH2-LEVNEDRIVAVQ-*   |                        | Stationary 1st Exp                           |
| NH2-LLENGYDPVYGA'*   |                        | Stationary 1st Exp                           |
| NH2-LPQVEGTGGDVC*    |                        | Stationary 1st Exp                           |
| NH2-LVGAPPGYVGYEI*   |                        | Stationary 1st Exp                           |

|                      |                        |                        |                    |
|----------------------|------------------------|------------------------|--------------------|
| NH2-M<Mox>SELQYG *   |                        |                        | Stationary 1st Exp |
| NH2-NKVTDAEIAEVL A * |                        |                        | Stationary 1st Exp |
| NH2-NNPVLIGEPGVGI *  |                        |                        | Stationary 1st Exp |
| NH2-QEGNVILFIDELH' * |                        |                        | Stationary 1st Exp |
| NH2-QLPKAIDLIDEA/ *  |                        |                        | Stationary 1st Exp |
| NH2-VFVAEPSVEDTIA *  |                        |                        | Stationary 1st Exp |
| NH2-VIGQNEAVDAVS *   |                        |                        | Stationary 1st Exp |
| NH2-VLALDM<Mox>G *   |                        |                        | Stationary 1st Exp |
| NH2-VLALDMGALVAC *   |                        |                        | Stationary 1st Exp |
| NH2-VTDAEIAEVLAR-( * |                        |                        | Stationary 1st Exp |
| NH2-IAQTLNLAK-CO( *  |                        |                        | Stationary 1st Exp |
| NH2-VGNLAFLDVTGR- *  |                        |                        | Stationary 1st Exp |
| NH2-ALGANLVLTEGAI *  | Stationary 1st Control | Stationary 2nd Control | Stationary 1st Exp |
| NH2-GAIQKAEIIVASN *  | Stationary 1st Control |                        | Stationary 1st Exp |
| NH2-GVLKPGVELVEPT *  |                        |                        | Stationary 1st Exp |
| NH2-IFEDNSLTIGHTPL * | Stationary 1st Control |                        | Stationary 1st Exp |
| NH2-IGANM<Mox>IM *   | Stationary 1st Control |                        | Stationary 1st Exp |
| NH2-IGANM<Mox>IM *   |                        |                        | Stationary 1st Exp |
| NH2-IGANMIWDAEK- *   |                        |                        | Stationary 1st Exp |
| NH2-IGANMIWDAEKR *   |                        |                        | Stationary 1st Exp |
| NH2-IQGIGAGFIPANLI * | Stationary 1st Control |                        | Stationary 1st Exp |
| NH2-LM<Mox>EEEGIL *  | Stationary 1st Control |                        | Stationary 1st Exp |
| NH2-LMEEEGILAGISS *  |                        |                        | Stationary 1st Exp |
| NH2-LTLTM<Mox>PE1' * | Stationary 1st Control |                        | Stationary 1st Exp |
| NH2-LVDKVGITNEEAI *  | Stationary 1st Control |                        | Stationary 1st Exp |
| NH2-NIVVILPSSGER-C * | Stationary 1st Control |                        | Stationary 1st Exp |
| NH2-RLM<Mox>EEEG *   |                        |                        | Stationary 1st Exp |
| NH2-RLMEEEGILAGIS' * |                        |                        | Stationary 1st Exp |
| NH2-SKIFEDNSLTIGHT * |                        |                        | Stationary 1st Exp |
| NH2-VIGITNEEAISTAR * | Stationary 1st Control |                        | Stationary 1st Exp |
| NH2-YLLLQQFSNPANF *  | Stationary 1st Control |                        | Stationary 1st Exp |
| NH2-YLSTALFADLFTEK * |                        |                        | Stationary 1st Exp |
| NH2-YLSTALFADLFTEK * |                        |                        | Stationary 1st Exp |
| NH2-ESFLNPGFR-COO *  |                        |                        | Stationary 1st Exp |
| NH2-NAGDAIM<Mox> *   |                        |                        | Stationary 1st Exp |
| NH2-ELGLVATDCLR-C' * | Stationary 1st Control |                        |                    |
| NH2-IPVIAGTGANATA *  | Stationary 1st Control |                        |                    |
| NH2-EAVNQVIALLDSC *  |                        |                        | Stationary 1st Exp |
| NH2-VGINELLR-COOH *  |                        |                        | Stationary 1st Exp |
| NH2-AALESTLAAITESL * |                        |                        |                    |
| NH2-EGDAVQLVGFGT *   |                        |                        |                    |
| NH2-IAAANVPAFVSGH' * | Stationary 1st Control |                        | Stationary 1st Exp |
| NH2-TQLIDVIAEKAELS * |                        |                        |                    |
| NH2-TQLIDVIAEK-COC * |                        |                        |                    |
| NH2-ALDAIIASVTESLK * |                        |                        |                    |
| NH2-EGDDVALVGFGT *   |                        |                        |                    |
| NH2-SQLIDKIAAGADIS * |                        |                        |                    |
| NH2-LKDGEDPGYTLYC *  |                        |                        | Stationary 1st Exp |

|                     |   |                        |                        |
|---------------------|---|------------------------|------------------------|
| NH2-QNLATFC<Cmm*    | * |                        | Stationary 1st Exp     |
| NH2-VQNASYQVAAYL    | * |                        | Stationary 1st Exp     |
| NH2-YWDVELR-COOH    | * |                        | Stationary 1st Exp     |
| NH2-FIDLFAGIGGIR-C  | * |                        |                        |
| NH2-IVLVGFR-COOH    | * |                        |                        |
| NH2-QFGNSVVVPVFA    | * |                        |                        |
| NH2-FDVLLGIDK-CO    | * |                        | Stationary 1st Exp     |
| NH2-LIELALER-COOH   | * |                        | Stationary 1st Exp     |
| NH2-ALLFVENR-COOH   | * |                        |                        |
| NH2-GVNVVALYGGQF    | * |                        |                        |
| NH2-LVLINPELLEK-CO  | * |                        | Stationary 1st Exp     |
| NH2-SDIALIQIQNPK-C  | * |                        |                        |
| NH2-ATGLDALFDATIK   | * |                        | Stationary 1st Exp     |
| NH2-DVAGYAAGLELFI   | * | Stationary 1st Control | Stationary 1st Exp     |
| NH2-EHIPVLVYGPK-CC  | * | Stationary 1st Control | Stationary 1st Exp     |
| NH2-ETFADIGQTLAK-(  | * | Stationary 1st Control | Stationary 2nd Control |
| NH2-GPLNLPNLTR-CO   | * | Stationary 1st Control | Stationary 1st Exp     |
| NH2-KGPLNLPNLTR-C   | * | Stationary 1st Control |                        |
| NH2-TGNRHDLAVEPP.   | * | Stationary 1st Control |                        |
| NH2-YFGTSDM<Mox>    | * | Stationary 1st Control |                        |
| NH2-YFGTSDMEYGK-(   | * |                        | Stationary 1st Exp     |
| NH2-AAIAYGADEVDV'   | * |                        | Stationary 1st Exp     |
| NH2-ALM<Mox>AGNI    | * |                        | Stationary 1st Exp     |
| NH2-FGASSLLASLLK-C  | * | Stationary 1st Control | Stationary 1st Exp     |
| NH2-IATVTNFPHGNDI   | * |                        | Stationary 1st Exp     |
| NH2-LM<Mox>DLTTLI   | * | Stationary 1st Control | Stationary 1st Exp     |
| NH2-TPVGNTAAIC<Cr   | * | Stationary 1st Control | Stationary 1st Exp     |
| NH2-VIIETGELKDEALIF | * |                        | Stationary 1st Exp     |
| NH2-IALESVLLGDKE-C  | * | Stationary 1st Control | Stationary 1st Exp     |
| NH2-YIAETFLEDAR-CC  | * | Stationary 1st Control |                        |
| NH2-YIAETFLEDAREVI  | * | Stationary 1st Control |                        |
| NH2-LINDVQDVLDEQI   | * | Stationary 1st Control | Stationary 1st Exp     |
| NH2-LVGAAAERGDSL    | * |                        | Stationary 1st Exp     |
| NH2-NYTGDIINFETAT   | * |                        | Stationary 1st Exp     |
| NH2-VIALVNNLGATPL   | * |                        | Stationary 1st Exp     |
| NH2-VTTVVIDDDVAVI   | * |                        | Stationary 1st Exp     |
| NH2-VTTVVIDDDVAVI   | * |                        | Stationary 1st Exp     |
| NH2-GIC<Cmm*>LSA    | * |                        | Stationary 1st Exp     |
| NH2-GPEAEEALIAFR-C  | * |                        | Stationary 1st Exp     |
| NH2-AAQEEEFSLER-C   | * |                        | Stationary 1st Exp     |
| NH2-KVEDEDFGYC<Cr   | * |                        | Stationary 1st Exp     |
| NH2-TVTHM<Mox>QI    | * |                        | Stationary 1st Exp     |
| NH2-AGVEVDDRGFIR-   | * | Stationary 1st Control | Stationary 2nd Control |
| NH2-ALAEHGIVFGEPK   | * | Stationary 1st Control | Stationary 2nd Control |
| NH2-APAEPQRYDAVL'   | * | Stationary 1st Control | Stationary 2nd Control |
| NH2-C<Cmm*>ADLGI    | * | Stationary 1st Control | Stationary 2nd Control |
| NH2-EDGIYVTMEGK-C   | * | Stationary 1st Control | Stationary 2nd Control |
| NH2-EKGISYETATFPW   | * | Stationary 1st Control | Stationary 2nd Control |

|                       |   |                        |                        |                    |
|-----------------------|---|------------------------|------------------------|--------------------|
| NH2-EKVINQLTGGLAC     | * | Stationary 1st Control |                        |                    |
| NH2-EKVINQLTGGLAC     | * | Stationary 1st Control | Stationary 2nd Control |                    |
| NH2-FNLM<Mox>LET      | * | Stationary 1st Control | Stationary 2nd Control |                    |
| NH2-FNLMLETK-COOH     | * | Stationary 1st Control | Stationary 2nd Control |                    |
| NH2-FTGANTLEVEGEM     | * | Stationary 1st Control | Stationary 2nd Control |                    |
| NH2-GISYETATFPWAA     | * | Stationary 1st Control | Stationary 2nd Control | Stationary 1st Exp |
| NH2-GVHEGHVAAEVI      | * | Stationary 1st Control | Stationary 2nd Control |                    |
| NH2-IWDSTDALELK-C     | * | Stationary 1st Control | Stationary 2nd Control | Stationary 1st Exp |
| NH2-IWDSTDALELKEV     | * | Stationary 1st Control | Stationary 2nd Control | Stationary 1st Exp |
| NH2-KAPAEPQRYDAV      | * | Stationary 1st Control | Stationary 2nd Control |                    |
| NH2-KFNLM<Mox>LE      | * | Stationary 1st Control | Stationary 2nd Control |                    |
| NH2-KFNLMLETK-COC     | * | Stationary 1st Control | Stationary 2nd Control |                    |
| NH2-LIFDKESHR-COOH    | * | Stationary 1st Control |                        |                    |
| NH2-PIQLPFIPHEDPR-    | * | Stationary 1st Control |                        |                    |
| NH2-STEIKTQVVVLGA     | * | Stationary 1st Control | Stationary 2nd Control |                    |
| NH2-TDIDKIR-COOH      | * | Stationary 1st Control |                        |                    |
| NH2-TNVPHIFAIGDIVC    | * | Stationary 1st Control | Stationary 2nd Control |                    |
| NH2-TNVPHIFAIGDIVC    | * | Stationary 1st Control | Stationary 2nd Control |                    |
| NH2-TQVVVLGAGPAG      | * | Stationary 1st Control | Stationary 2nd Control |                    |
| NH2-TVINFDNAIIAAGS    | * | Stationary 1st Control | Stationary 2nd Control |                    |
| NH2-VINQLTGGLAGM      | * | Stationary 1st Control | Stationary 2nd Control | Stationary 1st Exp |
| NH2-VINQLTGGLAGM      | * | Stationary 1st Control | Stationary 2nd Control | Stationary 1st Exp |
| NH2-VIPSIAYTEPEVAV    | * | Stationary 1st Control | Stationary 2nd Control |                    |
| NH2-VIPSIAYTEPEVAV    | * | Stationary 1st Control | Stationary 2nd Control |                    |
| NH2-VTAVEAKEDGIYV     | * | Stationary 1st Control | Stationary 2nd Control |                    |
| NH2-VTAVEAKEDGIYV     | * | Stationary 1st Control | Stationary 2nd Control |                    |
| NH2-VTAVEAKEDGIYV     | * | Stationary 1st Control | Stationary 2nd Control |                    |
| NH2-YDAVLVAIGR-CO     | * | Stationary 1st Control | Stationary 2nd Control | Stationary 1st Exp |
| NH2-YNTLGGVC<Cmn      | * | Stationary 1st Control | Stationary 2nd Control | Stationary 1st Exp |
| NH2-AVLFLYLNR-COO     | * |                        |                        |                    |
| #Gln->pyro-Glu (N-ter | * |                        | Stationary 1st Exp     |                    |
| #Gln->pyro-Glu (N-ter | * |                        | Stationary 1st Exp     |                    |
| NH2-AADNKSLGQFNL      | * |                        | Stationary 1st Exp     |                    |
| NH2-AKIELSSAQQTDV     | * | Stationary 1st Control | Stationary 1st Exp     |                    |
| NH2-AKLESLVEDLVNR     | * | Stationary 1st Control | Stationary 1st Exp     |                    |
| NH2-ASSGLNEDEIQK-     | * |                        | Stationary 1st Exp     |                    |
| NH2-DAEANAADRKF       | * | Stationary 1st Control | Stationary 1st Exp     |                    |
| NH2-DDDVVDAEFEEV      | * |                        | Stationary 1st Exp     |                    |
| NH2-DQGIDLR-COOH      | * |                        | Stationary 1st Exp     |                    |
| NH2-DVSIM<Mox>PFI     | * | Stationary 1st Control | Stationary 1st Exp     |                    |
| NH2-DVSIMPFK-COOH     | * |                        | Stationary 1st Exp     |                    |
| NH2-FQDEEVQR-COO      | * |                        | Stationary 1st Exp     |                    |
| NH2-FQDEEVQRDVSIM     | * |                        | Stationary 1st Exp     |                    |
| NH2-FQDEEVQRDVSIM     | * |                        | Stationary 1st Exp     |                    |
| NH2-GKIIIGIDLGTNSC    | * |                        | Stationary 1st Exp     |                    |
| NH2-HSQVFSTAEDNQ      | * | Stationary 1st Control | Stationary 1st Exp     |                    |

|                       |                        |                        |                    |
|-----------------------|------------------------|------------------------|--------------------|
| NH2-IAGLEVKR-COOH *   |                        |                        | Stationary 1st Exp |
| NH2-IELSSAQQTVDNL *   | Stationary 1st Control |                        | Stationary 1st Exp |
| NH2-IIAADNGDAWVE *    | Stationary 1st Control | Stationary 2nd Control | Stationary 1st Exp |
| NH2-IIGIDLGTNSC<C *   |                        |                        | Stationary 1st Exp |
| NH2-IINEPTAAALAYGI *  | Stationary 1st Control | Stationary 2nd Control | Stationary 1st Exp |
| NH2-IINEPTAAALAYGI *  | Stationary 1st Control |                        | Stationary 1st Exp |
| NH2-KDVNPDEAVAIG. *   |                        |                        | Stationary 1st Exp |
| NH2-KFEELVQTR-COO *   |                        |                        | Stationary 1st Exp |
| NH2-KTAEDYLGEPVTE *   |                        |                        | Stationary 1st Exp |
| NH2-LESLVEDLVNR-C *   |                        |                        | Stationary 1st Exp |
| NH2-LINYLVVEEFK-COC * |                        |                        | Stationary 1st Exp |
| NH2-LINYLVVEEFK-CO *  | Stationary 1st Control | Stationary 2nd Control | Stationary 1st Exp |
| NH2-LINYLVVEEFKKDQI * |                        |                        | Stationary 1st Exp |
| NH2-M<Mox>APPQIS *    |                        |                        | Stationary 1st Exp |
| NH2-M<Mox>APPQIS *    |                        |                        | Stationary 1st Exp |
| NH2-M<Mox>QELAQI *    |                        |                        | Stationary 1st Exp |
| NH2-MAPPQISAEVLK- *   |                        |                        | Stationary 1st Exp |
| NH2-MAPPQISAEVLKI *   |                        |                        | Stationary 1st Exp |
| NH2-NDPLAMQR-COC *    |                        |                        | Stationary 1st Exp |
| NH2-QAVTNPQNTLFA *    | Stationary 1st Control | Stationary 2nd Control | Stationary 1st Exp |
| NH2-QAVTNPQNTLFA *    | Stationary 1st Control | Stationary 2nd Control | Stationary 1st Exp |
| NH2-RFQDEEVQR-COI *   |                        |                        | Stationary 1st Exp |
| NH2-RIINEPTAAALAYC *  |                        |                        | Stationary 1st Exp |
| NH2-RIINEPTAAALAYC *  |                        |                        | Stationary 1st Exp |
| NH2-SLGQFNLDGINPA *   | Stationary 1st Control | Stationary 2nd Control | Stationary 1st Exp |
| NH2-TAEDYLGEPVTEA *   | Stationary 1st Control |                        | Stationary 1st Exp |
| NH2-TFEVLATNGDTHI *   |                        |                        | Stationary 1st Exp |
| NH2-TTPSIIAYTQDGEI *  |                        |                        | Stationary 1st Exp |
| NH2-TTPSIIAYTQDGEI *  | Stationary 1st Control | Stationary 2nd Control | Stationary 1st Exp |
| NH2-VAEFFGKEPR-CO *   |                        |                        | Stationary 1st Exp |
| NH2-VALQDAGLSVSDI *   | Stationary 1st Control |                        | Stationary 1st Exp |
| NH2-VLENAEGDR-COC *   |                        |                        | Stationary 1st Exp |
| NH2-VLENAEGDRTPS *    |                        |                        | Stationary 1st Exp |
| NH2-VLENAEGDRTPS *    | Stationary 1st Control | Stationary 2nd Control | Stationary 1st Exp |
| NH2-AHVGDFIFTSK-CI *  |                        |                        | Stationary 1st Exp |
| NH2-EHLLKPLQQVSGF *   |                        |                        |                    |
| NH2-FFDIC<Cmm*>R- *   |                        |                        | Stationary 1st Exp |
| NH2-GLPEGAEIAVQLE *   |                        |                        | Stationary 1st Exp |
| NH2-GVIELMR-COOH *    |                        |                        |                    |
| NH2-HLEAGC<Cmm*> *    |                        |                        |                    |
| NH2-KFFDIC<Cmm*>f *   |                        |                        | Stationary 1st Exp |
| NH2-KGVIELM<Mox>I *   |                        |                        | Stationary 1st Exp |
| NH2-KGVIELMR-COOH *   |                        |                        |                    |
| NH2-LAVC<Cmm*>SN *    |                        |                        | Stationary 1st Exp |
| NH2-LAVC<Cmm*>SN *    |                        |                        | Stationary 1st Exp |
| NH2-LIEATQFSM<Mo: *   |                        |                        | Stationary 1st Exp |
| NH2-LIEATQFSMAHQI *   |                        |                        | Stationary 1st Exp |
| NH2-LYVSENQLK-COC *   |                        |                        | Stationary 1st Exp |



|                       |                        |                    |
|-----------------------|------------------------|--------------------|
| NH2-M<Mox>LDGGDI *    |                        | Stationary 1st Exp |
| NH2-M<Mox>M<Mox> *    |                        |                    |
| NH2-M<Mox>M<Mox> *    |                        |                    |
| NH2-M<Mox>MLTDSI *    |                        |                    |
| NH2-MLDGGDNPLR-C *    |                        | Stationary 1st Exp |
| NH2-MMLTDSVSSVQI *    |                        |                    |
| NH2-NPKHLEAGC<C> *    |                        |                    |
| NH2-RLIEATQFSMAHC *   |                        |                    |
| NH2-VALVQPHEPGAT *    |                        | Stationary 1st Exp |
| NH2-VQIGSNIR-COC *    |                        | Stationary 1st Exp |
| NH2-YYLNGM<Mox>L *    |                        | Stationary 1st Exp |
| NH2-YYLNGMLFETEGI *   |                        | Stationary 1st Exp |
| NH2-AIGEAKDDDTADI *   | Stationary 1st Control | Stationary 1st Exp |
| NH2-AVQLGGVALGTT *    | Stationary 1st Control | Stationary 1st Exp |
| NH2-ELADRYAIVAND\ *   |                        | Stationary 1st Exp |
| NH2-GANFIAVHEM<N> *   |                        | Stationary 1st Exp |
| NH2-GANFIAVHEMLD *    |                        | Stationary 1st Exp |
| NH2-KAIGEAKDDDTAI *   |                        | Stationary 1st Exp |
| NH2-QVIQFIDLSLITK-C * |                        | Stationary 1st Exp |
| NH2-TALIDHLDTMAEF *   |                        | Stationary 1st Exp |
| NH2-FVTAYLGDAGM< *    | Stationary 1st Control | Stationary 1st Exp |
| NH2-FVTAYLGDAGML *    |                        | Stationary 1st Exp |
| NH2-KFVTAYLGDAGM *    |                        | Stationary 1st Exp |
| NH2-LPIVVYTPDNVDV *   | Stationary 1st Control | Stationary 1st Exp |
| NH2-AGDIAAAIGLK-C *   |                        | Stationary 1st Exp |
| NH2-AGPLAGYPVVDN *    |                        | Stationary 1st Exp |
| NH2-AGPLAGYPVVDN *    |                        | Stationary 1st Exp |
| NH2-AKPVLLEPIMK-C *   |                        | Stationary 1st Exp |
| NH2-ASYTM<Mox>EF *    |                        | Stationary 1st Exp |
| NH2-ASYTMEFLKYDEA *   |                        | Stationary 1st Exp |
| NH2-DVTTGDTLC<Cm> *   |                        | Stationary 1st Exp |
| NH2-EFNVEANVGKPO *    |                        | Stationary 1st Exp |
| NH2-GGVIPGEYIPAVD *   |                        | Stationary 1st Exp |
| NH2-GITITSAATTAFW. *  |                        | Stationary 1st Exp |
| NH2-GITITSAATTAFW. *  |                        | Stationary 1st Exp |
| NH2-GQYGHVVIDM<I> *   |                        | Stationary 1st Exp |
| NH2-GYEFINDIK-COOI *  |                        | Stationary 1st Exp |
| NH2-HASDDEPFSALAF *   |                        | Stationary 1st Exp |
| NH2-IATDPFVGNLTFFI *  | Stationary 1st Control | Stationary 1st Exp |
| NH2-IGEVHDGAATM< *    |                        | Stationary 1st Exp |
| NH2-IGEVHDGAATM< *    |                        | Stationary 1st Exp |
| NH2-IGEVHDGAATMC *    |                        | Stationary 1st Exp |
| NH2-IHAEVPLSEM<M> *   |                        | Stationary 1st Exp |
| NH2-IHAEVPLSEMGY *    |                        | Stationary 1st Exp |
| NH2-ILFYTGVNHK-CO *   |                        | Stationary 1st Exp |
| NH2-INIIDTPGHVDFTI *  |                        | Stationary 1st Exp |
| NH2-LGANPVPLQLAIG *   |                        |                    |

|                         |                        |                    |
|-------------------------|------------------------|--------------------|
| NH2-LHFGSYHDVDSSE *     |                        | Stationary 1st Exp |
| NH2-M<Mox>EFPEPV *      |                        | Stationary 1st Exp |
| NH2-MEFPEPVISIAVEI *    |                        | Stationary 1st Exp |
| NH2-VEVETPEENTGDV *     |                        | Stationary 1st Exp |
| NH2-VLNNEIILVTC<Cr *    |                        | Stationary 1st Exp |
| NH2-VYSGVVNSGDTV *      |                        | Stationary 1st Exp |
| NH2-YDEAPSNVAQAV *      |                        | Stationary 1st Exp |
| NH2-YLGGEELTEAEIK- *    |                        | Stationary 1st Exp |
| NH2-YLGGEELTEAEIKC *    |                        | Stationary 1st Exp |
| NH2-VPLFVQIGEVIC- *     |                        | Stationary 1st Exp |
| NH2-FKGDDIVDTVTLT *     |                        |                    |
| NH2-DAGFQAFADK-CI *     |                        | Stationary 1st Exp |
| NH2-DAGFQAFADKVL *      |                        | Stationary 1st Exp |
| NH2-FEVGEGIEKVETD *     |                        | Stationary 1st Exp |
| NH2-FTGEVSLTGQPFV *     |                        | Stationary 1st Exp |
| NH2-VAALEGDVLSYC *      |                        | Stationary 1st Exp |
| #Gln->pyro-Glu (N-ter * |                        | Stationary 1st Exp |
| NH2-AFDQIDNAPEEK- *     |                        |                    |
| NH2-AGENGVLLR-CC *      | Stationary 1st Control | Stationary 1st Exp |
| NH2-AIDKPFLPIEDVF *     | Stationary 1st Control | Stationary 1st Exp |
| NH2-ALEGDAEWEAK-I *     |                        | Stationary 1st Exp |
| NH2-EHILLGR-COOH *      |                        | Stationary 1st Exp |
| NH2-ELLSQYDFPGDDT *     | Stationary 1st Control | Stationary 1st Exp |
| NH2-FESEVYILSK-COO *    | Stationary 1st Control | Stationary 1st Exp |
| NH2-FESEVYILSKDEGC *    | Stationary 1st Control | Stationary 1st Exp |
| NH2-GIIKVGEEVEIVGI *    |                        | Stationary 1st Exp |
| NH2-GITINTSHVEYDTI *    | Stationary 1st Control | Stationary 1st Exp |
| NH2-GYRPQFYFR-COC *     | Stationary 1st Control | Stationary 1st Exp |
| NH2-ILELAGFLDSYIPEI *   | Stationary 1st Control | Stationary 1st Exp |
| NH2-M<Mox>VVTLIH *      | Stationary 1st Control | Stationary 1st Exp |
| NH2-M<Mox>VVTLIH *      | Stationary 1st Control | Stationary 1st Exp |
| NH2-MVVTLIHPIAM<I *     |                        | Stationary 1st Exp |
| NH2-MVVTLIHPIAMD *      |                        | Stationary 1st Exp |
| NH2-NM<Mox>ITGAA *      |                        | Stationary 1st Exp |
| NH2-NM<Mox>ITGAA *      |                        | Stationary 1st Exp |
| NH2-QVGVPYIIVFLNK *     | Stationary 1st Control | Stationary 1st Exp |
| NH2-STC<Cmm*>TGV *      | Stationary 1st Control | Stationary 1st Exp |
| NH2-TTDVTGTIELPEG *     |                        | Stationary 1st Exp |
| NH2-TTLTAAITTVLAK- *    | Stationary 1st Control | Stationary 1st Exp |
| NH2-VGEEVEIVGIK-CC *    | Stationary 1st Control | Stationary 1st Exp |
| NH2-VGEEVEIVGIKETC *    | Stationary 1st Control | Stationary 1st Exp |
| NH2-HLPSDTGIEVAFA *     |                        |                    |
| NH2-TQLINLFEVADGK *     |                        |                    |
| NH2-AFTSEEFTHFLEEL *    | Stationary 1st Control |                    |
| NH2-AVAAVNGPIAQA *      | Stationary 1st Control | Stationary 1st Exp |
| NH2-AVAAVNGPIAQA *      | Stationary 1st Control |                    |
| NH2-DAGYTAVISHR-C *     |                        | Stationary 1st Exp |
| NH2-DQAGIDKIM<Mc *      |                        | Stationary 1st Exp |

|                      |                        |                    |
|----------------------|------------------------|--------------------|
| NH2-FGANAILAVSLAN *  |                        | Stationary 1st Exp |
| NH2-FGANAILAVSLAN *  | Stationary 1st Control | Stationary 1st Exp |
| NH2-FNQIGSLTETLAAI * | Stationary 1st Control | Stationary 1st Exp |
| NH2-GIANSILIK-COOH * |                        | Stationary 1st Exp |
| NH2-GM<Mox>NTAVI *   |                        | Stationary 1st Exp |
| NH2-GNPTVEAEVHLEI *  | Stationary 1st Control | Stationary 1st Exp |
| NH2-IMIDLDGTENK-C *  |                        | Stationary 1st Exp |
| NH2-IQLVGDDLFTNT *   | Stationary 1st Control | Stationary 1st Exp |
| NH2-SGETEDATIADLA *  | Stationary 1st Control | Stationary 1st Exp |
| NH2-SKFGANAILAVSL *  |                        | Stationary 1st Exp |
| NH2-VLGDKIQLVGDDI *  | Stationary 1st Control | Stationary 1st Exp |
| NH2-GPQLPAPNM<M *    |                        | Stationary 1st Exp |
| NH2-GPQLPAPNM<M *    |                        | Stationary 1st Exp |
| NH2-LIM<Mox>GLADI *  |                        | Stationary 1st Exp |
| NH2-LIMGLADGEVLVI *  |                        | Stationary 1st Exp |
| NH2-VGLFQDTSAF-CC *  |                        |                    |
| NH2-FQVFGADAM<M *    |                        | Stationary 1st Exp |
| NH2-FQVFGADAMR-C *   |                        | Stationary 1st Exp |
| NH2-SGITFSQELK-COC * |                        | Stationary 1st Exp |
| NH2-AC<Cmm*>EEAA *   |                        | Stationary 1st Exp |
| NH2-QLYNPVQWTK-C *   |                        |                    |
| NH2-TWQTQPALLTAS *   |                        |                    |
| NH2-ASTPLGVGGFGA *   |                        | Stationary 1st Exp |
| NH2-IIAYGDADVM<M *   |                        | Stationary 1st Exp |
| NH2-AEFGEVDILVNNI *  |                        |                    |
| NH2-GITVNVVAPGFIE *  |                        |                    |
| NH2-GLM<Mox>LNVT *   |                        |                    |
| NH2-GLMLNVTPASIE *   |                        |                    |
| NH2-IIGTGSYLPEQVR- * | Stationary 1st Control | Stationary 1st Exp |
| NH2-AAVAFLGTAIDAC *  |                        |                    |
| NH2-YFATGAATPGAAI *  |                        | Stationary 1st Exp |
| NH2-ILLSPC<Cmm*>G *  |                        | Stationary 1st Exp |
| NH2-QFNNIGATTPVVI *  |                        | Stationary 1st Exp |
| NH2-AGSLIAVLILR-CO * |                        | Stationary 1st Exp |
| NH2-GSAYGGVLSNFSC *  |                        |                    |
| NH2-YSGSSYPFPTTSET * |                        | Stationary 1st Exp |
| NH2-AALMMGINR-CC *   |                        |                    |
| NH2-VNSDVLTVSTVNI *  |                        |                    |
| NH2-LDGVIPGWTEGLI *  |                        |                    |
| NH2-LSDQEIEQTLQAF *  |                        | Stationary 1st Exp |
| NH2-SAYALGASLGR-C *  |                        |                    |
| NH2-EGVNSTESGLQFF *  |                        |                    |
| NH2-LIDGTVFDSSVAR *  | Stationary 1st Control | Stationary 1st Exp |
| NH2-WELTIPQELAYGE *  |                        | Stationary 1st Exp |
| NH2-AITGIFFGSDTGN' * | Stationary 1st Control | Stationary 1st Exp |
| NH2-GATIVGHWPTAC *   |                        | Stationary 1st Exp |
| NH2-GLADDDHFVGLA *   |                        | Stationary 1st Exp |
| NH2-QISEELHLDEILNA * |                        |                    |

|                      |                        |                        |                    |
|----------------------|------------------------|------------------------|--------------------|
| NH2-IIFAGTPDFAAR-C * |                        |                        | Stationary 1st Exp |
| NH2-VAEEVAELLAR-C *  |                        |                        | Stationary 1st Exp |
| NH2-SILLTALAR-COOH * |                        |                        | Stationary 1st Exp |
| NH2-VTSVEAITDTVYR *  |                        |                        | Stationary 1st Exp |
| NH2-AILQQIAAVR-CO *  |                        |                        | Stationary 1st Exp |
| NH2-EVSQSVDDTIELV *  |                        |                        | Stationary 1st Exp |
| NH2-LFDYLTDGTGNLPR * |                        |                        | Stationary 1st Exp |
| NH2-SGEGLYFIDK-COC * |                        |                        |                    |
| NH2-SGEGLYFIDKELST * |                        |                        |                    |
| NH2-SIIDKLSLAGK-CO * |                        |                        |                    |
| NH2-M<Mox>AFAEQC *   |                        |                        | Stationary 1st Exp |
| NH2-VAPEALTLLAR-CC * |                        |                        | Stationary 1st Exp |
| NH2-DVQLEQELLEAC *   |                        |                        | Stationary 1st Exp |
| NH2-EILAQLSQYPVSTI * |                        |                        | Stationary 1st Exp |
| NH2-GVLPTC<Cmm*> *   | Stationary 1st Control |                        | Stationary 1st Exp |
| NH2-GVYNTYIEDNLR-I * |                        |                        | Stationary 1st Exp |
| NH2-LASAHYYDELPTC *  |                        |                        | Stationary 1st Exp |
| NH2-YSQNAALDMYK-I *  |                        |                        | Stationary 1st Exp |
| NH2-AGIALNDNFVK-C *  | Stationary 1st Control | Stationary 2nd Control | Stationary 1st Exp |
| NH2-FDGTVEVKDGHLL *  |                        |                        | Stationary 1st Exp |
| NH2-GANFDKYAGQDI *   |                        |                        | Stationary 1st Exp |
| NH2-GASQNIIPSSTGA *  |                        |                        | Stationary 1st Exp |
| NH2-LVSWYDNETGYS *   | Stationary 1st Control |                        | Stationary 1st Exp |
| NH2-VINDNFGIIEGLM *  | Stationary 1st Control |                        | Stationary 1st Exp |
| NH2-VINDNFGIIEGLM *  | Stationary 1st Control |                        | Stationary 1st Exp |
| NH2-VLDLIAHISK-COC * | Stationary 1st Control | Stationary 2nd Control | Stationary 1st Exp |
| NH2-VPTPNVSVVDLTV *  | Stationary 1st Control |                        | Stationary 1st Exp |
| NH2-VPTPNVSVVDLTV *  | Stationary 1st Control |                        | Stationary 1st Exp |
| NH2-FSATFDDQM<M *    |                        |                        | Stationary 1st Exp |
| NH2-FSATFDDQMLVD *   |                        |                        | Stationary 1st Exp |
| NH2-KVNPETTLFLVAS *  |                        |                        | Stationary 1st Exp |
| NH2-LLSNFFAQTEALA *  |                        |                        | Stationary 1st Exp |
| NH2-NINPTQTAAWQI *   |                        |                        | Stationary 1st Exp |
| NH2-SNTPILVDGKDVN *  |                        |                        | Stationary 1st Exp |
| NH2-TFSEAIISGEWK-C * |                        |                        | Stationary 1st Exp |
| NH2-VFEGNRPTNSILLI * | Stationary 1st Control |                        | Stationary 1st Exp |
| NH2-VNPETTLFLVASK *  |                        |                        | Stationary 1st Exp |
| NH2-ADVAPSNLAIVGF *  |                        |                        | Stationary 1st Exp |
| NH2-IQSGELSAIPHQLI * |                        |                        | Stationary 1st Exp |
| NH2-TAYWELVR-COO *   |                        |                        | Stationary 1st Exp |
| NH2-TGFNDSLDIR-CC *  | Stationary 1st Control |                        | Stationary 1st Exp |
| NH2-VGPALTFALR-CO *  |                        |                        | Stationary 1st Exp |
| NH2-AVFALGAGVDSIL *  |                        |                        | Stationary 1st Exp |
| NH2-LPDGAYLLNLAR-I * |                        |                        | Stationary 1st Exp |
| NH2-AM<Mox>LAAEC *   |                        |                        | Stationary 1st Exp |
| NH2-AMLAAEQHVVTI *   |                        |                        | Stationary 1st Exp |
| NH2-DAGLVVEIAPFGC *  |                        |                        |                    |
| NH2-FLQEWEE-COOH *   |                        |                        |                    |

|                      |                        |                    |
|----------------------|------------------------|--------------------|
| NH2-FVLGFAQSTVEK-*   |                        | Stationary 1st Exp |
| NH2-GIAETAQC<Cmm*    |                        | Stationary 1st Exp |
| NH2-LGEYLKPLAER-CC*  |                        | Stationary 1st Exp |
| NH2-LLAAGIGDALATV*   |                        | Stationary 1st Exp |
| NH2-SFKDAGLVVEIAP*   |                        | Stationary 1st Exp |
| NH2-WLVVGDKFVLGF*    |                        | Stationary 1st Exp |
| NH2-YIQGADVNR-CO*    |                        | Stationary 1st Exp |
| NH2-YLLLNNPNM<M*     |                        | Stationary 1st Exp |
| NH2-YLLLNNPNMVI*     |                        | Stationary 1st Exp |
| NH2-LALC<Cmm*>DI/*   |                        | Stationary 1st Exp |
| NH2-VLSGPGLVNLYR-*   |                        | Stationary 1st Exp |
| NH2-DVAEILLEGLR-CC*  |                        | Stationary 1st Exp |
| NH2-AGGVFTDEAIDA\*   |                        | Stationary 1st Exp |
| NH2-AGGVFTDEAIDA\*   |                        | Stationary 1st Exp |
| NH2-AINALANPTTNSY*   |                        | Stationary 1st Exp |
| NH2-C<Cmm*>DILEP*    |                        | Stationary 1st Exp |
| NH2-FGSSISGSHVAIDI*  |                        |                    |
| NH2-GGYFPVPPVDSA*    |                        | Stationary 1st Exp |
| NH2-LVPGYEAPVM<M*    |                        | Stationary 1st Exp |
| NH2-LVPGYEAPVMLA\*   |                        | Stationary 1st Exp |
| NH2-M<Mox>FDGSSI*    |                        | Stationary 1st Exp |
| NH2-M<Mox>TPHPVE*    |                        | Stationary 1st Exp |
| NH2-MFDGSSIGGWK-*    |                        | Stationary 1st Exp |
| NH2-SAEHVLTM<Mox*    |                        | Stationary 1st Exp |
| NH2-SAEHVLTMLNEH*    |                        | Stationary 1st Exp |
| NH2-YAGLSEQALYYIG*   |                        |                    |
| NH2-ADAVLHDTPNILY*   |                        |                    |
| NH2-AVGDSLEAQQYG*    |                        | Stationary 1st Exp |
| NH2-GLVNATGPWVK-*    |                        | Stationary 1st Exp |
| NH2-LVLANAQMVVR-*    |                        |                    |
| NH2-VSQWLVEYTQQF*    |                        |                    |
| NH2-NLTLVAGINWPSI*   | Stationary 1st Control |                    |
| NH2-SAFDEFSTPAAR-*   | Stationary 1st Control |                    |
| NH2-FAYVDILQNPDIR*   |                        |                    |
| NH2-QIAENPILLYMK-C*  |                        |                    |
| NH2-AM<Mox>VEVFL*    | Stationary 1st Control |                    |
| NH2-AAVLLADSFK-CO*   | Stationary 1st Control | Stationary 1st Exp |
| NH2-EGDVLLGISTSGN*   |                        | Stationary 1st Exp |
| NH2-ELPLTESLALTIDR*  |                        | Stationary 1st Exp |
| NH2-FTGWYDVDLSEK*    |                        | Stationary 1st Exp |
| NH2-FTGWYDVDLSEK*    |                        | Stationary 1st Exp |
| NH2-GFAVTPPELTK-C*   |                        | Stationary 1st Exp |
| NH2-LSEKELPLTESLAL\* |                        | Stationary 1st Exp |
| NH2-VIPYWNETILPR-C*  | Stationary 1st Control | Stationary 1st Exp |
| NH2-YYLGNADEIAAK-*   | Stationary 1st Control | Stationary 1st Exp |
| NH2-AFFANPVLTGAVI*   | Stationary 1st Control | Stationary 1st Exp |
| NH2-AFVNADFDGFAR*    |                        | Stationary 1st Exp |
| NH2-IYLHAFDGR-CO*    |                        | Stationary 1st Exp |



|                       |   |                        |
|-----------------------|---|------------------------|
| NH2-VATYDLQPEM<N      | * | Stationary 1st Exp     |
| NH2-VATYDLQPEMSS.     | * | Stationary 1st Exp     |
| NH2-AANDDLLNSFWL      | * | Stationary 1st Control |
| NH2-AGYAEDEVVAVS      | * | Stationary 1st Exp     |
| NH2-EVPVEVKPEVR-C     | * | Stationary 1st Exp     |
| NH2-LGDIEYR-COOH      | * | Stationary 1st Exp     |
| NH2-LGDIEYREVPVEV     | * | Stationary 1st Control |
| NH2-VEGGQHNLNVNVI     | * | Stationary 1st Exp     |
| NH2-ALEVADKANPDM      | * | Stationary 1st Exp     |
| NH2-ANPDM<Mox>S/      | * | Stationary 1st Exp     |
| NH2-DEKVANLEAQLAI     | * | Stationary 1st Exp     |
| NH2-FINELLPVIDSLDR    | * | Stationary 1st Exp     |
| NH2-VANLEAQLAEAQ      | * | Stationary 1st Control |
| NH2-AFTGVGGTPLFIE     | * | Stationary 1st Exp     |
| NH2-ELIPGGVNSPVR-(    | * | Stationary 1st Exp     |
| NH2-GLSFGAPTEM<M      | * | Stationary 1st Exp     |
| NH2-IIGGGM<Mox>P'     | * | Stationary 1st Exp     |
| NH2-IIGGGMPVGAFG      | * | Stationary 1st Exp     |
| NH2-YTLTC<Cmm*>T'     | * | Stationary 1st Exp     |
| NH2-VNADGTLATTGH      | * | Stationary 1st Exp     |
| NH2-FNWETLIASR-CO     | * | Stationary 1st Exp     |
| NH2-M<Mox>AERPEV      | * | Stationary 1st Exp     |
| NH2-QLLAPVNSISR-CC    | * | Stationary 1st Exp     |
| NH2-EWVAVYYDNPDI      | * | Stationary 1st Control |
| NH2-TVAGFHVLGPWE      | * | Stationary 1st Exp     |
| NH2-ILVIAADER-COOH    | * | Stationary 1st Control |
| NH2-KLLTGDSPFAANA     | * | Stationary 1st Control |
| NH2-LLTGDSPFAANAL     | * | Stationary 1st Control |
| NH2-M<Mox>GM<M        | * | Stationary 1st Control |
| NH2-M<Mox>GMNIIM      | * | Stationary 1st Control |
| NH2-MGM<Mox>NIIM      | * | Stationary 1st Control |
| NH2-AKGQSLQDPFLN.     | * | Stationary 1st Exp     |
| NH2-ERVPVSIYLVNGIK    | * | Stationary 1st Exp     |
| NH2-GQSLQDPFLNALI     | * | Stationary 1st Exp     |
| NH2-LQGQIESFDQFVI     | * | Stationary 1st Exp     |
| NH2-VPVSIYLVNGIK-C    | * | Stationary 1st Exp     |
| #Gln->pyro-Glu (N-ter | * | Stationary 1st Exp     |
| NH2-AESFQAVADATL/     | * | Stationary 1st Exp     |
| NH2-AESFQAVADATL/     | * | Stationary 1st Exp     |
| NH2-ALNDKGITDILVVI    | * | Stationary 1st Exp     |
| NH2-ALNDKGITDILVVI    | * | Stationary 1st Exp     |
| NH2-EIPFLYASSAATYC    | * | Stationary 1st Exp     |
| NH2-ELLHYC<Cmm*>      | * | Stationary 1st Exp     |
| NH2-EYEKPLNVYGYSK     | * | Stationary 1st Exp     |
| NH2-FLFDEYVR-COOH     | * | Stationary 1st Exp     |
| NH2-GITDILVVDNLK-C    | * | Stationary 1st Exp     |
| NH2-GITDILVVDNLKD.    | * | Stationary 1st Exp     |
| NH2-GQIEYIPFPDK-CC    | * | Stationary 1st Exp     |

|                         |                    |
|-------------------------|--------------------|
| NH2-GQIEYIPFPDKLK- *    | Stationary 1st Exp |
| NH2-GRYQAFTQADLT *      | Stationary 1st Exp |
| NH2-GSM<Mox>ASV/ *      | Stationary 1st Exp |
| NH2-GSMASVAFHLNT *      | Stationary 1st Exp |
| NH2-KGQIEYIPFPDK-C *    | Stationary 1st Exp |
| NH2-KGQIEYIPFPDKL *     | Stationary 1st Exp |
| NH2-LFEGSENFK-COO *     | Stationary 1st Exp |
| NH2-LFEGSENFKR-CO *     | Stationary 1st Exp |
| NH2-M<Mox>IIVTGG/ *     | Stationary 1st Exp |
| NH2-MIIVTGGAGFIGS *     | Stationary 1st Exp |
| NH2-QILPEANSQIVGF *     | Stationary 1st Exp |
| NH2-TSDFIESR-COOH *     | Stationary 1st Exp |
| NH2-TVAEGVTEYM<M *      | Stationary 1st Exp |
| NH2-TVAEGVTEYM<M *      | Stationary 1st Exp |
| NH2-TVAEGVTEYMAV *      | Stationary 1st Exp |
| NH2-TVAEGVTEYMAV *      | Stationary 1st Exp |
| NH2-YFNVYGPR-COOI *     | Stationary 1st Exp |
| NH2-YQAFTQADLTNLI *     | Stationary 1st Exp |
| NH2-ELVIALIK-COOH *     |                    |
| NH2-IIITSATIDPER-CO *   |                    |
| NH2-LLLLNIPIK-COC *     |                    |
| NH2-LPIEPISQASANQI *    |                    |
| NH2-LTFTALQQR-COC *     |                    |
| NH2-LYHEEEVTVYDPC *     |                    |
| NH2-YLFENFAVR-COC *     | Stationary 1st Exp |
| NH2-ALSNPDLYEGDGI *     | Stationary 1st Exp |
| NH2-ALSNPDLYEGDGI *     | Stationary 1st Exp |
| NH2-EGPAEDFANQEA *      | Stationary 1st Exp |
| NH2-FASTHTDSSAQTV *     | Stationary 1st Exp |
| NH2-GTLEDPNLFIR-CC *    | Stationary 1st Exp |
| NH2-IYYITADSYAAAK- *    | Stationary 1st Exp |
| NH2-VDESLEKLADEV D *    | Stationary 1st Exp |
| NH2-YSDHIALPVEIEK- *    | Stationary 1st Exp |
| NH2-YSDHIALPVEIEKR *    | Stationary 1st Exp |
| NH2-EEFGGELIDGGPV *     | Stationary 1st Exp |
| NH2-VAIKGPLTTPVGG *     | Stationary 1st Exp |
| #Gln->pyro-Glu (N-ter * |                    |
| NH2-AEEAGVDLVEISP *     |                    |
| NH2-EALEKAEEAGVDI *     |                    |
| NH2-FRPGTDEGDYQV *      |                    |
| NH2-LTGLEGEQLGIVSI *    |                    |
| NH2-QM<Mox>IMVL/ *      |                    |
| NH2-QMIM<Mox>VL/ *      |                    |
| NH2-QMIMVLAPK-CO *      |                    |
| NH2-VKDDLQELAVVE: *     |                    |
| NH2-VKDDLQELAVVE: *     |                    |
| NH2-AEM<Mox>SEYLI *     |                    |
| NH2-AEM<Mox>SEYLI *     |                    |

|                       |                        |                    |
|-----------------------|------------------------|--------------------|
| NH2-AEMSEYLFDK-CC *   |                        |                    |
| NH2-AEMSEYLFDKLGL *   |                        |                    |
| NH2-ELVELFFEEIR-CO *  |                        |                    |
| NH2-ELVELFFEEIRR-CC * |                        |                    |
| NH2-LSGFGNFDLR-CO *   |                        | Stationary 1st Exp |
| NH2-TGEDIPITAR-COC *  |                        |                    |
| NH2-GFGSFSLHYR-CO *   |                        | Stationary 1st Exp |
| NH2-TVEDAVKEM<M *     |                        |                    |
| NH2-AEIVASFER-COOI *  | Stationary 1st Control | Stationary 1st Exp |
| NH2-EYDHIKDVNDLPE *   |                        | Stationary 1st Exp |
| NH2-VEGWENAEAAKA *    |                        | Stationary 1st Exp |
| NH2-FTNPNVKDEC<C *    |                        | Stationary 1st Exp |
| NH2-SLQFLDGTQLDFV *   |                        | Stationary 1st Exp |
| NH2-ALGLNDELAHSSII *  |                        | Stationary 1st Exp |
| NH2-EGFEVTYLAPQR- *   |                        | Stationary 1st Exp |
| NH2-EIVFTSGATESDN *   |                        | Stationary 1st Exp |
| NH2-FGWQAEAAVDIA *    |                        | Stationary 1st Exp |
| NH2-NQIADLVGADPR- *   |                        | Stationary 1st Exp |
| NH2-SGTLPVHQIVGM *    |                        | Stationary 1st Exp |
| NH2-VTRPEDLALAEFY *   | Stationary 1st Control |                    |
| NH2-IILLGAPGAGK-CC *  |                        | Stationary 1st Exp |
| NH2-LVTDELVIALVK-C *  | Stationary 1st Control | Stationary 1st Exp |
| NH2-YGIPQISTGDM<M *   | Stationary 1st Control |                    |
| NH2-IHVAVAQEVPGT( *   |                        | Stationary 1st Exp |
| NH2-SFVVIIIPAR-COOH * |                        | Stationary 1st Exp |
| NH2-LIAFSDLLEK-COO *  |                        | Stationary 1st Exp |
| NH2-VGLSVAVADAHP *    |                        | Stationary 1st Exp |
| NH2-SSLIQALLK-COOH *  |                        | Stationary 1st Exp |
| NH2-EITSTDDFYR-COC *  |                        | Stationary 1st Exp |
| NH2-GAVETAEKLDAPI *   |                        | Stationary 1st Exp |
| NH2-GDLGVEIPVEEVII *  | Stationary 1st Control | Stationary 1st Exp |
| NH2-TAAILLDTKGPEIR *  | Stationary 1st Control | Stationary 1st Exp |
| NH2-ISSGLPIFAM<Mo *   |                        | Stationary 1st Exp |
| NH2-TLNLTYLR-COO *    |                        | Stationary 1st Exp |
| NH2-ALDILTATPPDVFI *  | Stationary 1st Control |                    |
| NH2-DGGAQHFADC<C *    | Stationary 1st Control |                    |
| NH2-IETLVPDFR-COOI *  | Stationary 1st Control |                    |
| NH2-NPYLTYAR-COOH *   |                        |                    |
| NH2-VIIGDRVEIGAC<C *  |                        |                    |
| NH2-PLLSFTVDHTR-( *   | Stationary 1st Control | Stationary 1st Exp |
| NH2-TM<Mox>NTPHC *    |                        | Stationary 1st Exp |
| NH2-AGLTLVDLIK-CC *   | Stationary 1st Control | Stationary 1st Exp |
| NH2-FGGYAQSGLLAEI *   |                        |                    |
| NH2-LYPFTWDAVR-CC *   |                        | Stationary 1st Exp |
| NH2-TWEEIPALDKELK *   |                        | Stationary 1st Exp |
| NH2-VNYGVTVLPTFK- *   | Stationary 1st Control | Stationary 1st Exp |
| NH2-GYWEC<Cmm*> *     |                        |                    |
| NH2-FGELPFLFK-COOI *  |                        | Stationary 1st Exp |

|                      |                        |                        |
|----------------------|------------------------|------------------------|
| NH2-LINSVQNYAWGS *   | Stationary 1st Control | Stationary 1st Exp     |
| NH2-SALDSQQGEPWC *   |                        | Stationary 1st Exp     |
| NH2-YIDIPELVANVK-C * |                        | Stationary 1st Exp     |
| NH2-DAVNGTISYTNEA *  |                        | Stationary 1st Exp     |
| NH2-EQDAPITADQLLA *  |                        | Stationary 1st Exp     |
| NH2-GSGPYFYLPK-CO *  | Stationary 1st Control | Stationary 1st Exp     |
| NH2-IYQLKPNPAVLIC< * |                        | Stationary 1st Exp     |
| NH2-LM<Mox>EQITTS *  |                        | Stationary 1st Exp     |
| NH2-QAVTM<Mox>DI *   |                        | Stationary 1st Exp     |
| NH2-QAVTMDKPFLNA *   |                        | Stationary 1st Exp     |
| NH2-QM<Mox>LGEEM *   |                        | Stationary 1st Exp     |
| NH2-RVEITGPVER-CO *  |                        | Stationary 1st Exp     |
| NH2-TEQATTTDELAFT *  |                        | Stationary 1st Exp     |
| NH2-VFM<Mox>ADFE *   |                        | Stationary 1st Exp     |
| NH2-VFMADFEDSLAP *   |                        | Stationary 1st Exp     |
| NH2-VIASELGEER-COC * |                        | Stationary 1st Exp     |
| NH2-VIDGQINLR-COO *  |                        | Stationary 1st Exp     |
| NH2-LNLVQSIITR-COC * | Stationary 1st Control | Stationary 1st Exp     |
| NH2-M<Mox>AIPEQP *   |                        | Stationary 1st Exp     |
| NH2-YIDDFVTEGHGTL *  |                        | Stationary 1st Exp     |
| NH2-AC<Cmm*>IGIIT *  |                        | Stationary 1st Exp     |
| NH2-ALQGEQGVVEC< *   |                        | Stationary 1st Exp     |
| NH2-DIALGEEFVNK-CI * | Stationary 1st Control | Stationary 1st Exp     |
| NH2-FFSQPLLLGK-COC * | Stationary 1st Control | Stationary 1st Exp     |
| NH2-GFSGEDATPALEC *  |                        | Stationary 1st Exp     |
| NH2-LFGVTTLDIIR-CO * |                        | Stationary 1st Exp     |
| NH2-SDLFNVNAGIVK- *  |                        | Stationary 1st Exp     |
| NH2-FFINPTGR-COOH *  |                        | Stationary 1st Exp     |
| NH2-VPSEQLTLLVR-CC * |                        | Stationary 1st Exp     |
| NH2-WKLLKEK-COOH *   |                        |                        |
| NH2-IKLVGVIPEDQSVI * |                        | Stationary 1st Exp     |
| NH2-LVGVIPEDQSVLR *  |                        | Stationary 1st Exp     |
| NH2-TENLYILPASQTR- * |                        | Stationary 1st Exp     |
| NH2-ALLDFFLSR-COOI * |                        |                        |
| NH2-KNTANIAK-COOH *  | Stationary 2nd Control |                        |
| NH2-SQVSTEFIPTR-CC * |                        | Stationary 1st Exp     |
| NH2-TAWENIIAPQLDA *  |                        | Stationary 1st Exp     |
| NH2-TLIFAM<Mox>PC *  |                        | Stationary 1st Exp     |
| NH2-LADIASGQPLPVA *  |                        | Stationary 1st Exp     |
| NH2-IIAVLEPR-COOH *  |                        | Stationary 1st Exp     |
| NH2-IIWPENDINLK-CC * |                        | Stationary 1st Exp     |
| NH2-HEDFPYQEILLTR- * |                        | Stationary 1st Exp     |
| NH2-M<Mox>DSSFTP *   | Stationary 1st Control | Stationary 1st Exp     |
| NH2-VLVC<Cmm*>VP *   |                        | Stationary 1st Exp     |
| NH2-HLVSPADALPGR- *  | Stationary 1st Control | Stationary 1st Exp     |
| NH2-SAIYPLTPEQDAA *  | Stationary 1st Control | Stationary 2nd Control |
| NH2-SLVLGISGGQDST *  |                        | Stationary 1st Exp     |
| NH2-YGDGGTDINPLYF *  | Stationary 1st Control | Stationary 1st Exp     |

|                          |                        |                        |                    |
|--------------------------|------------------------|------------------------|--------------------|
| NH2-SRLPQNITLTEV-C *     | Stationary 1st Control |                        | Stationary 1st Exp |
| NH2-LLANQEEGTQIR- *      |                        |                        |                    |
| NH2-QLLNEFPELK-COI *     | Stationary 1st Control |                        | Stationary 1st Exp |
| NH2-VEYM<Mox>LQS *       | Stationary 1st Control |                        | Stationary 1st Exp |
| NH2-VEYMLQSQINPQ *       |                        |                        | Stationary 1st Exp |
| NH2-M<Mox>TSISEVT *      |                        |                        |                    |
| NH2-IEVPEIGEEVIEIK- *    |                        |                        | Stationary 1st Exp |
| NH2-VAINEAIELAK-CC *     |                        |                        | Stationary 1st Exp |
| #Acetyl (Protein N-ter * | Stationary 1st Control |                        |                    |
| #Gln->pyro-Glu (N-ter *  | Stationary 1st Control | Stationary 2nd Control |                    |
| #Gln->pyro-Glu (N-ter *  |                        | Stationary 2nd Control |                    |
| NH2-ALNVM<Mox>LK *       | Stationary 1st Control |                        |                    |
| NH2-ALNVMLK-COOH *       |                        | Stationary 2nd Control |                    |
| NH2-AQYLIDQLLAEAR *      | Stationary 1st Control | Stationary 2nd Control | Stationary 1st Exp |
| NH2-AQYLIDQLLAEAR *      | Stationary 1st Control |                        |                    |
| NH2-ARNEQDGGDLVY *       | Stationary 1st Control | Stationary 2nd Control |                    |
| NH2-ATVILAHTIK-COC *     | Stationary 1st Control | Stationary 2nd Control |                    |
| NH2-DLELGGHM<Mo; *       | Stationary 1st Control | Stationary 2nd Control |                    |
| NH2-DRFNVPVSDADIE *      | Stationary 1st Control | Stationary 2nd Control |                    |
| NH2-DRFNVPVSDADIE *      |                        | Stationary 2nd Control |                    |
| NH2-DRLVPIIADEAR-C *     |                        | Stationary 2nd Control |                    |
| NH2-DWLQAIESVIR-C *      | Stationary 1st Control | Stationary 2nd Control |                    |
| NH2-DWLQAIESVIREE *      | Stationary 1st Control | Stationary 2nd Control |                    |
| NH2-DYGVGSDVYSVT: *      | Stationary 1st Control | Stationary 2nd Control |                    |
| NH2-EAAEILAK-COOH *      | Stationary 1st Control | Stationary 2nd Control |                    |
| NH2-EHFFGKYPETAAL *      |                        | Stationary 2nd Control |                    |
| NH2-EISTTIAFVR-COO *     | Stationary 1st Control | Stationary 2nd Control | Stationary 1st Exp |
| NH2-EKLDNLVFINC< *       | Stationary 1st Control | Stationary 2nd Control |                    |
| NH2-EQVAYYK-COOH *       | Stationary 1st Control |                        |                    |
| NH2-EQVAYYKEDEK-C *      | Stationary 1st Control |                        |                    |
| NH2-FNIDADKVNPR-C *      | Stationary 1st Control | Stationary 2nd Control |                    |
| NH2-FNVPVSDADIEK- *      | Stationary 1st Control | Stationary 2nd Control |                    |
| NH2-FNVPVSDADIEKL *      | Stationary 1st Control | Stationary 2nd Control |                    |
| NH2-FPNDVDPIETR-C *      | Stationary 1st Control | Stationary 2nd Control | Stationary 1st Exp |
| NH2-GAITIATR-COOH *      | Stationary 1st Control | Stationary 2nd Control |                    |
| NH2-GFLIGGTSGR-CO *      | Stationary 1st Control | Stationary 2nd Control |                    |
| NH2-GGVNVAAGTGIS *       |                        | Stationary 2nd Control |                    |
| NH2-GIYKLETIEGSK-C *     | Stationary 1st Control | Stationary 2nd Control |                    |
| NH2-GKATVILAHTIK-C *     | Stationary 1st Control | Stationary 2nd Control |                    |
| NH2-GKVQLLGSISILR *      | Stationary 1st Control | Stationary 2nd Control |                    |
| NH2-GYGMGDAAEGK *        |                        | Stationary 2nd Control |                    |
| NH2-HHFEVDASYVVV. *      | Stationary 1st Control | Stationary 2nd Control |                    |
| NH2-IGDLC<Cmm*>M *       | Stationary 1st Control | Stationary 2nd Control | Stationary 1st Exp |
| NH2-IINELEGIFEGAGV *     | Stationary 1st Control | Stationary 2nd Control |                    |
| NH2-KGGVNVAAGTGI *       | Stationary 1st Control | Stationary 2nd Control |                    |
| NH2-KGGVNVAAGTGI *       | Stationary 1st Control |                        |                    |
| NH2-KGIYKLETIEGSK-C *    | Stationary 1st Control | Stationary 2nd Control |                    |
| NH2-KIYA AFK-COOH *      | Stationary 1st Control |                        |                    |

|                       |                          |                        |                    |
|-----------------------|--------------------------|------------------------|--------------------|
| NH2-LDNLVFINC<Cr      | * Stationary 1st Control | Stationary 2nd Control |                    |
| NH2-LELPSLQDFGALLI    | * Stationary 1st Control | Stationary 2nd Control |                    |
| NH2-LETIEGSK-COOH     | * Stationary 1st Control | Stationary 2nd Control |                    |
| NH2-LFAEQVR-COOH      | * Stationary 1st Control |                        |                    |
| NH2-LIQLM<Mox>NE      | * Stationary 1st Control | Stationary 2nd Control |                    |
| NH2-LIQLMNETVDGD      | * Stationary 1st Control | Stationary 2nd Control |                    |
| NH2-LM<Mox>PEFWC      | * Stationary 1st Control |                        |                    |
| NH2-LM<Mox>PEFWC      | *                        | Stationary 2nd Control |                    |
| NH2-LMPEFWQFPTVS      | * Stationary 1st Control | Stationary 2nd Control |                    |
| NH2-LPYITFPEGSEEHT    | * Stationary 1st Control | Stationary 2nd Control |                    |
| NH2-LTQEQLDNFR-CC     | * Stationary 1st Control | Stationary 2nd Control |                    |
| NH2-LVPIIADEAR-COC    | * Stationary 1st Control | Stationary 2nd Control | Stationary 1st Exp |
| NH2-NEQDGGDLVYFC      | * Stationary 1st Control | Stationary 2nd Control | Stationary 1st Exp |
| NH2-QENVYYYITTLNE     | * Stationary 1st Control | Stationary 2nd Control |                    |
| NH2-QENVYYYITTLNE     | *                        | Stationary 2nd Control |                    |
| NH2-QIGIYSPNGQQYT     | * Stationary 1st Control |                        |                    |
| NH2-QIGIYSPNGQQYT     | * Stationary 1st Control |                        |                    |
| NH2-QPNFTEKLELPSLI    | * Stationary 1st Control | Stationary 2nd Control |                    |
| NH2-QTVYAFLGDGEM      | * Stationary 1st Control | Stationary 2nd Control | Stationary 1st Exp |
| NH2-QTVYAFLGDGEM      | * Stationary 1st Control | Stationary 2nd Control |                    |
| NH2-SERFPNDVDPIET     | * Stationary 1st Control | Stationary 2nd Control | Stationary 1st Exp |
| NH2-TFGM<Mox>EGL      | * Stationary 1st Control | Stationary 2nd Control | Stationary 1st Exp |
| NH2-TFGMEGLFR-COC     | * Stationary 1st Control | Stationary 2nd Control |                    |
| NH2-TYVPADDYR-COC     | * Stationary 1st Control | Stationary 2nd Control | Stationary 1st Exp |
| NH2-VLGTDFGR-COC      | * Stationary 1st Control | Stationary 2nd Control |                    |
| NH2-VPYIAQVM<Mox      | * Stationary 1st Control | Stationary 2nd Control |                    |
| NH2-VPYIAQVM<Mox      | * Stationary 1st Control | Stationary 2nd Control |                    |
| NH2-VPYIAQVMNDAF      | * Stationary 1st Control | Stationary 2nd Control |                    |
| NH2-VPYIAQVMNDAF      | * Stationary 1st Control | Stationary 2nd Control |                    |
| NH2-VQLLGSGSILR-CC    | * Stationary 1st Control | Stationary 2nd Control |                    |
| NH2-WDELLR-COOH       | * Stationary 1st Control | Stationary 2nd Control |                    |
| NH2-WNAIM<Mox>T       | * Stationary 1st Control | Stationary 2nd Control | Stationary 1st Exp |
| NH2-WNAIMTVLR-CO      | * Stationary 1st Control | Stationary 2nd Control |                    |
| NH2-WNM<Mox>LHP       | * Stationary 1st Control | Stationary 2nd Control | Stationary 1st Exp |
| NH2-WNMLHPLETPR-      | * Stationary 1st Control | Stationary 2nd Control |                    |
| NH2-YPETAALVADWT      | * Stationary 1st Control | Stationary 2nd Control |                    |
| #Gln->pyro-Glu (N-ter | *                        | Stationary 2nd Control |                    |
| NH2-AEAPAATGGGII      | * Stationary 1st Control | Stationary 2nd Control |                    |
| NH2-AEAPAATGGGII      | * Stationary 1st Control | Stationary 2nd Control |                    |
| NH2-AEAPAAAPAAK-C     | *                        | Stationary 2nd Control |                    |
| NH2-AEGKSEFAENDA'     | * Stationary 1st Control | Stationary 2nd Control |                    |
| NH2-AEGKSEFAENDA'     | * Stationary 1st Control |                        |                    |
| NH2-AIEIKVPDIGADEV    | * Stationary 1st Control | Stationary 2nd Control |                    |
| NH2-AVAAALEQM<M       | * Stationary 1st Control | Stationary 2nd Control |                    |
| NH2-AVAAALEQMPR-      | * Stationary 1st Control | Stationary 2nd Control |                    |
| NH2-DVNVDPDIGSDEVI    | * Stationary 1st Control | Stationary 2nd Control |                    |
| NH2-EAAPAAAPAAAA      | *                        | Stationary 2nd Control |                    |



|                     |                          |                        |                    |
|---------------------|--------------------------|------------------------|--------------------|
| NH2-EFGVNLAK-COOH   | * Stationary 1st Control | Stationary 2nd Control |                    |
| NH2-EVNVDPDIGGDEVI  | * Stationary 1st Control | Stationary 2nd Control |                    |
| NH2-EVNVDPDIGGDEVI  | * Stationary 1st Control | Stationary 2nd Control |                    |
| NH2-FGEIEEVELGR-CC  | * Stationary 1st Control | Stationary 2nd Control | Stationary 1st Exp |
| NH2-FITIINNTLSDIR-C | * Stationary 1st Control | Stationary 2nd Control |                    |
| NH2-FITIINNTLSDIRR- | * Stationary 1st Control | Stationary 2nd Control |                    |
| NH2-FNSSLSEGDQR-C   | * Stationary 1st Control | Stationary 2nd Control |                    |
| NH2-ILREDVQAYVK-C   | * Stationary 1st Control | Stationary 2nd Control |                    |
| NH2-ISGANLSR-COOH   | * Stationary 1st Control | Stationary 2nd Control |                    |
| NH2-ITPVVFIM<Mox>   | * Stationary 1st Control | Stationary 2nd Control | Stationary 1st Exp |
| NH2-ITPVVFIMK-COO   | * Stationary 1st Control | Stationary 2nd Control |                    |
| NH2-KGIIELSR-COOH   | * Stationary 1st Control |                        |                    |
| NH2-KLDVKITPVVFIM-  | * Stationary 1st Control |                        |                    |
| NH2-KLDVKITPVVFIM   | * Stationary 1st Control |                        |                    |
| NH2-KYINIGVAVDTPN   | * Stationary 1st Control |                        |                    |
| NH2-KYINIGVAVDTPN   | * Stationary 1st Control |                        |                    |
| NH2-LM<Mox>LPISLS   | * Stationary 1st Control | Stationary 2nd Control | Stationary 1st Exp |
| NH2-LMLPISLSFDHR-C  | * Stationary 1st Control | Stationary 2nd Control |                    |
| NH2-QEAAPAAAPAPA    | * Stationary 1st Control | Stationary 2nd Control |                    |
| NH2-RAEAAPAATGGG    | * Stationary 1st Control | Stationary 2nd Control |                    |
| NH2-RAEAAPAATGGG    | * Stationary 1st Control | Stationary 2nd Control |                    |
| NH2-SAM<Mox>EPVV    | * Stationary 1st Control | Stationary 2nd Control |                    |
| NH2-SAM<Mox>EPVV    | * Stationary 1st Control | Stationary 2nd Control | Stationary 1st Exp |
| NH2-SAMEPVWNGK(-    | *                        | Stationary 2nd Control |                    |
| NH2-SAMEPVWNGKE     | * Stationary 1st Control | Stationary 2nd Control |                    |
| NH2-SEFAENDAYVHA'   | * Stationary 1st Control | Stationary 2nd Control | Stationary 1st Exp |
| NH2-SEFAENDAYVHA'   | * Stationary 1st Control |                        |                    |
| NH2-TDITELEAFR-COC  | * Stationary 1st Control | Stationary 2nd Control |                    |
| NH2-TDITELEAFRK-CC  | * Stationary 1st Control | Stationary 2nd Control |                    |
| NH2-TGSLIM<Mox>IF   | * Stationary 1st Control | Stationary 2nd Control |                    |
| NH2-TGSLIM<Mox>IF   | * Stationary 1st Control | Stationary 2nd Control |                    |
| NH2-TGSLIMIFEVEGA.  | * Stationary 1st Control | Stationary 2nd Control |                    |
| NH2-TGSLIMIFEVEGA.  | * Stationary 1st Control | Stationary 2nd Control |                    |
| NH2-TQTGALIM<Mox>   | * Stationary 1st Control |                        |                    |
| NH2-TQTGALIMIFDSA   | *                        | Stationary 2nd Control |                    |
| NH2-TQTGALIMIFDSA   | * Stationary 1st Control | Stationary 2nd Control |                    |
| NH2-VDFSKFGEIEEVEI  | * Stationary 1st Control |                        |                    |
| NH2-VIDGADGAR-CO(-  | *                        | Stationary 2nd Control |                    |
| NH2-VNVGDKVSTGSLI   | * Stationary 1st Control | Stationary 2nd Control |                    |
| NH2-VNVGDKVSTGSLI   | *                        | Stationary 2nd Control |                    |
| NH2-VPDIGADEVEITEI  | * Stationary 1st Control | Stationary 2nd Control |                    |
| NH2-VSTGSLIM<Mox>   | * Stationary 1st Control | Stationary 2nd Control |                    |
| NH2-VSTGSLIMVFEVA   | *                        | Stationary 2nd Control |                    |
| NH2-VSVGDKTQTGAL    | * Stationary 1st Control |                        |                    |
| NH2-VSVGDKTQTGAL    | * Stationary 1st Control | Stationary 2nd Control |                    |
| NH2-VSVGDKTQTGAL    | * Stationary 1st Control | Stationary 2nd Control |                    |
| NH2-YINIGVAVDTPNG   | * Stationary 1st Control | Stationary 2nd Control |                    |

|                       |                        |                        |
|-----------------------|------------------------|------------------------|
| NH2-YINIGVAVDTPNG *   | Stationary 1st Control | Stationary 2nd Control |
| NH2-YINIGVAVDTPNG *   | Stationary 1st Control | Stationary 2nd Control |
| NH2-YLTEQGFQVR-CC *   |                        | Stationary 1st Exp     |
| NH2-ETGQSFLDNILSR *   | Stationary 1st Control | Stationary 1st Exp     |
| NH2-FEEEEGIFNR-COO *  |                        | Stationary 1st Exp     |
| NH2-NYQAALFILR-COI *  |                        | Stationary 1st Exp     |
| NH2-QLEFGLFDFR-CO *   |                        | Stationary 1st Exp     |
| NH2-AQGNM<Mox>P *     |                        | Stationary 1st Exp     |
| NH2-SPAFDSIM<Mox> *   |                        | Stationary 1st Exp     |
| NH2-SPAFDSIMAETLK *   |                        | Stationary 1st Exp     |
| NH2-AEITLDYQLK-COC *  |                        | Stationary 1st Exp     |
| NH2-AEITLDYQLKS-CC *  |                        | Stationary 1st Exp     |
| NH2-GKGTVSTESGVLN *   | Stationary 1st Control | Stationary 1st Exp     |
| NH2-GTVSTESGVLNQI *   |                        | Stationary 1st Exp     |
| NH2-IALKSEVAVPGID/ *  |                        | Stationary 1st Exp     |
| NH2-TEVYPIGIEPK-CO *  |                        | Stationary 1st Exp     |
| NH2-AVILVAAWLGDA *    |                        | Stationary 1st Exp     |
| NH2-M<Mox>LIETLPI *   |                        | Stationary 1st Exp     |
| NH2-DTFWWADK GK-( *   |                        | Stationary 1st Exp     |
| NH2-EAEPEIYN AIR-CO * |                        | Stationary 1st Exp     |
| NH2-GVLTNLGAVAVD *    |                        | Stationary 1st Exp     |
| NH2-LFIDNFDKYDTDP, *  |                        | Stationary 1st Exp     |
| NH2-LFVVDAFC<Cmm *    |                        | Stationary 1st Exp     |
| NH2-M<Mox>QLIGGT *    |                        | Stationary 1st Exp     |
| NH2-NDNKPLSPETWC *    |                        | Stationary 1st Exp     |
| NH2-VIFLTADAFGVLP I * |                        | Stationary 1st Exp     |
| NH2-VSYPIYHIDNIVKP *  |                        | Stationary 1st Exp     |
| NH2-EAVPAGFETFK-C *   |                        | Stationary 1st Exp     |
| NH2-ADGIGSLLPAAR-( *  |                        | Stationary 1st Exp     |
| NH2-ALQLGIEASNINPI *  |                        | Stationary 1st Exp     |
| NH2-GNIGYIGVPER-( *   |                        | Stationary 1st Exp     |
| NH2-FLNYVSLDTQSK-( *  |                        | Stationary 1st Exp     |
| NH2-GVM<Mox>VNA *     |                        | Stationary 1st Exp     |
| NH2-IELLPYHEL GK-CO * |                        | Stationary 1st Exp     |
| NH2-YVVVPGWSDDDI *    |                        | Stationary 1st Exp     |
| NH2-EM<Mox>LLDAM *    |                        | Stationary 1st Exp     |
| NH2-ITEQEAQEM<Mc *    |                        | Stationary 1st Exp     |
| NH2-IVGLQTEAPLKR-C *  |                        | Stationary 1st Exp     |
| NH2-LATAWEGFTK-CC *   |                        | Stationary 1st Exp     |
| NH2-QMQFFGAR-COC *    |                        | Stationary 1st Exp     |
| NH2-SEPIKGDV LNYDE *  |                        | Stationary 1st Exp     |
| NH2-SGVL TGLP DAYGF * |                        | Stationary 1st Exp     |
| NH2-TSTFLDVYIER-CO *  |                        | Stationary 1st Exp     |
| NH2-VALYGIDY LMK-C *  |                        | Stationary 1st Exp     |
| NH2-VDDLAVDLVER-C *   |                        | Stationary 1st Exp     |
| NH2-ASLPTIELALK-CO *  | Stationary 1st Control | Stationary 1st Exp     |
| NH2-FADVAC<Cmm*> *    | Stationary 1st Control | Stationary 1st Exp     |
| NH2-IADQLIVGGGIAN *   | Stationary 1st Control | Stationary 1st Exp     |

|                      |                        |                        |
|----------------------|------------------------|------------------------|
| NH2-ISYISTGGGAFLEF * |                        | Stationary 1st Exp     |
| NH2-LLTTC<Cmm*>N *   | Stationary 1st Control | Stationary 2nd Control |
| NH2-LTVLDSLSK-COOI * | Stationary 1st Control | Stationary 1st Exp     |
| NH2-SLYEADLVDEAK-( * | Stationary 1st Control | Stationary 1st Exp     |
| NH2-SLYEADLVDEAKR *  | Stationary 1st Control | Stationary 1st Exp     |
| NH2-TILWNGPVGVEI *   |                        | Stationary 1st Exp     |
| NH2-VATEFSETAPATLI * | Stationary 1st Control | Stationary 2nd Control |
| NH2-VLPAVAM<Mox> *   | Stationary 1st Control | Stationary 1st Exp     |
| NH2-VLPAVAMLEER-C *  | Stationary 1st Control | Stationary 1st Exp     |
| NH2-YAALC<Cmm*>D *   | Stationary 1st Control | Stationary 1st Exp     |
| NH2-YAALC<Cmm*>D *   |                        | Stationary 1st Exp     |
| NH2-ANALLADGLK-CC *  |                        |                        |
| NH2-SNDVSLPILVLTAF * |                        |                        |
| NH2-FNDGDFLR-COOI *  |                        | Stationary 1st Exp     |
| NH2-LIPAADISEQISTA * |                        | Stationary 1st Exp     |
| NH2-LWQATHAHPFDI *   |                        |                        |
| NH2-NIIFAINK-COOH *  |                        | Stationary 1st Exp     |
| NH2-QC<Cmm*>NPAI *   |                        | Stationary 1st Exp     |
| NH2-SNYPWFR-COOH *   |                        | Stationary 1st Exp     |
| NH2-TFAYTNHTLM<M *   |                        | Stationary 1st Exp     |
| NH2-TGIEINPQAIFDIQ * |                        |                        |
| NH2-VADVINNDPLVG *   |                        |                        |
| NH2-VADVINNDPLVG *   |                        | Stationary 1st Exp     |
| NH2-VGEENIFIFGHTVI * |                        | Stationary 1st Exp     |
| NH2-VVFLPDYC<Cmm *   |                        |                        |
| NH2-YGLNSAAEMTPR *   |                        | Stationary 1st Exp     |
| NH2-AAVAGIAMGLVK *   |                        | Stationary 1st Exp     |
| NH2-AKPGQDFPPLTVI *  |                        | Stationary 1st Exp     |
| NH2-ALTEETGTTIEIED * |                        | Stationary 1st Exp     |
| NH2-DAQVLDELM<M *    |                        | Stationary 1st Exp     |
| NH2-EIMQVALNQAK-( *  |                        |                        |
| NH2-GDISEFAPR-COO *  |                        | Stationary 1st Exp     |
| NH2-GETQALVTATLGT *  |                        | Stationary 1st Exp     |
| NH2-IVDFGAFVAIGGG *  |                        |                        |
| NH2-LHILGVM<Mox>I *  |                        | Stationary 1st Exp     |
| NH2-RIEETAEIEVGR-C * |                        |                        |
| NH2-EGFYNTIFHR-CI *  |                        | Stationary 1st Exp     |
| NH2-VINGFM<Mox>IC *  |                        | Stationary 1st Exp     |
| NH2-AGQNAM<Mox> *    |                        |                        |
| NH2-EEQHTPVSDISAL *  |                        |                        |
| NH2-EVIAFLAER-COOI * |                        | Stationary 1st Exp     |
| NH2-IGIFQDLVDR-COI * |                        | Stationary 1st Exp     |
| NH2-LYTSSWR-COOH *   |                        | Stationary 1st Exp     |
| NH2-VDLGNPC<Cmr *    |                        |                        |
| NH2-VQLNSGM<Mox: *   |                        |                        |
| NH2-VQLNSGMSLIVR- *  |                        |                        |
| NH2-DAAYHFQGDADI *   |                        |                        |
| NH2-DLQSIADYPVK-CI * |                        |                        |

|                        |                        |                    |
|------------------------|------------------------|--------------------|
| NH2-IGAAASNTNADM *     |                        |                    |
| NH2-LDLENAILIHDPQI *   |                        |                    |
| NH2-LQYYVNTDQLVV *     |                        |                    |
| NH2-TANDFYIPEDEPF *    |                        |                    |
| NH2-ALLLKEDEIVDR-C *   |                        | Stationary 1st Exp |
| NH2-DALPTEEEQFAAY *    |                        | Stationary 1st Exp |
| NH2-EENPFLGWR-CO *     | Stationary 1st Control | Stationary 1st Exp |
| NH2-M<Mox>ISGILAS *    |                        | Stationary 1st Exp |
| NH2-SLELPAIVGTGSV *    |                        | Stationary 1st Exp |
| NH2-VLAEQALAQPTTI *    |                        | Stationary 1st Exp |
| NH2-VLGFITDAGGR-C *    |                        | Stationary 1st Exp |
| NH2-LSGSVTVGETPVII *   | Stationary 1st Control | Stationary 1st Exp |
| NH2-VGDTVIEFDLPLLI *   |                        | Stationary 1st Exp |
| NH2-VKVGDTVIEFDLP *    |                        | Stationary 1st Exp |
| NH2-IIVVSDEVAADTVI *   |                        | Stationary 1st Exp |
| NH2-ALEIISELAAK-CO *   |                        | Stationary 1st Exp |
| NH2-AVQLNSLSGFC<C *    |                        | Stationary 1st Exp |
| NH2-EVTTTPLAADDW *     |                        | Stationary 1st Exp |
| NH2-GNNVVVLGTQW *      |                        | Stationary 1st Exp |
| NH2-GNNVVVLGTQW *      |                        | Stationary 1st Exp |
| NH2-IVDLLTER-COOH *    |                        | Stationary 1st Exp |
| NH2-SGLPQAALNYIK-C *   |                        | Stationary 1st Exp |
| NH2-TGWLDTVAVR-C *     |                        | Stationary 1st Exp |
| NH2-TVLHLIPSGILR-CC *  |                        | Stationary 1st Exp |
| NH2-VGDLFDKETFAEK *    |                        | Stationary 1st Exp |
| NH2-YVDYVLGILK-CO *    |                        | Stationary 1st Exp |
| NH2-GLDAILVPGGFGY *    |                        | Stationary 1st Exp |
| NH2-AIGINFIDTYIR-CC *  |                        | Stationary 1st Exp |
| NH2-ILLINPTDSDAVGI *   |                        | Stationary 1st Exp |
| NH2-LAATIAQLPDQIG *    |                        | Stationary 1st Exp |
| NH2-ISGDYAYGWLR-C *    |                        | Stationary 1st Exp |
| NH2-VLLFGQAIQTAGT *    |                        | Stationary 1st Exp |
| NH2-DVIIIILDSITR-COC * |                        |                    |
| NH2-KQDIIFAILK-COO *   |                        |                    |
| NH2-QDIIFAILK-COOH *   |                        |                    |
| NH2-VLDLASPIGR-CO *    |                        |                    |
| NH2-ANLVPHF-COOH *     |                        | Stationary 1st Exp |
| NH2-AVDGEM<Mox>I *     |                        | Stationary 1st Exp |
| NH2-AVDGEM<Mox>I *     |                        | Stationary 1st Exp |
| NH2-AVDGEMITVTVEI *    |                        | Stationary 1st Exp |
| NH2-AVDGEMITVTVEI *    |                        | Stationary 1st Exp |
| NH2-DEVFALSNIQK-CI *   |                        | Stationary 1st Exp |
| NH2-FVGEEVTLVLR-CI *   |                        | Stationary 1st Exp |
| NH2-PLFTAEHYAR-CO *    |                        | Stationary 1st Exp |
| NH2-AAGAELVGM<M *      |                        |                    |
| NH2-AAGAELVGMEDI *     |                        |                    |
| NH2-QYDINEAIALLK-C *   |                        |                    |
| NH2-VAVFTQGANAEA *     |                        |                    |

NH2-VVGQLGQVLGPR \*  
NH2-GLPIPVVITVYADF \*  
NH2-FDGNAC<Cmm\* \*  
NH2-YAGVGDIIK-COO \*  
NH2-VEGGVVDLNTLK \*  
NH2-VILAGEVTTPTV \*  
NH2-GLAQGTDVSFGS \*  
NH2-VVEPLITLAK-COC \*  
NH2-SAGTYVQIVAR-C \*  
NH2-SANIALVLYK-COC \*  
NH2-ILADIAVFDK-COC \*  
NH2-VAFQAVIK-COOH \*  
NH2-VAFTALVEK-COC \*  
NH2-IGVPPFVDGGVIK-( \*  
NH2-EAAIQVSNVAIFN \*  
NH2-VIVEGINLVK-COC \*  
NH2-DAQSALTVSETTF \*  
NH2-DATGIDPVSLIAFI \*  
NH2-DFNEALVHQVVV \*  
NH2-DVQFIEQFR-COC \*  
NH2-FGC<Cmm\*>ATF \*  
NH2-FIFNAER-COOH \*  
NH2-FYEAVMSSHAR-C \*  
NH2-M<Mox>C<Cmm \*  
NH2-MC<Cmm\*>SSPI \*  
NH2-DFDDAVYC<Cmm \*  
NH2-DGQLVFTR-COOH \*  
NH2-DGYGFLR-COOH \*  
NH2-DLPLVTIDGEDAR \*  
NH2-DLPLVTIDGEDAR \*  
NH2-DYAEELLESVADRP \*  
NH2-EFILEHLTK-COOH \*  
NH2-EFILEHLTKR-COC \*  
NH2-GGISFESEEAK-CC \*  
NH2-GHFGLALQSYAHI \*  
NH2-GVISSVTGFGFFV \*  
NH2-IHDKPSTEAITSR \*  
NH2-IVEVLGDNM<Mc \*  
NH2-IVEVLGDNM<Mc \*  
NH2-IVEVLGDNMGTG \*  
NH2-IVEVLGDNMGTG \*  
NH2-KIDFSLISSER-COC \*  
NH2-KVNFEPDSAFRGI \*  
NH2-LDDLFDGLVHVS \*  
NH2-LIEEC<Cmm\*>M \*  
NH2-LIEEC<Cmm\*>M \*  
NH2-LSFDILIPDQIMC \*  
NH2-LWVAIADVSYYVI \*

Stationary 1st Exp

NH2-M<Mox>GFVVV \*  
NH2-MGFVVVVELTQR \*  
NH2-QAIYDPENR-COC \*  
NH2-SVLAELGLELPGG \*  
NH2-TC<Cmm\*>IHGD \*  
NH2-THEIPYIWPQAVE \*  
NH2-VNFEPDSAFR-CC \*  
NH2-VNFEPDSAFRGEI \*  
NH2-VWHILQGDQDLF \*  
NH2-VWHILQGDQDLF \*  
NH2-YFTEAGVGFVVPI \*  
NH2-AATILAEQLEAFVI \*  
NH2-AEAIHYIGDLVQR \*  
NH2-LLVDAC<Cmm\*> \*  
NH2-SLTEIKDVLASR-C \*  
NH2-VTLEPLER-COOH \*  
NH2-ALEIEEM<Mox>C \*  
NH2-ALEIEEMQLK-CO \*  
NH2-AVAVDSGVTAVA \*  
NH2-AVLVAGGVEAEK \*  
NH2-AYDLGADVRCO \*  
NH2-FIEQDPEGQYGLE \*  
NH2-GGVVQYVDASR- \*  
NH2-GM<Mox>PIATP \*  
NH2-GMPIATPVFDGA \*  
NH2-ISALGPGGLTR-CC \*  
NH2-ITQGDDLAPGVLF \*  
NH2-KLPATIILR-COOH \*  
NH2-LGDLPTSGQIR-CC \*  
NH2-LGEPVFDVQEC<C \*  
NH2-LGPEEITADIPNV \*  
NH2-LIEVPVEYIAGK-C \*  
NH2-LPATIILR-COOH \*  
NH2-LSALVEIYR-COOH \*  
NH2-MNIGQILETHLGM \*  
NH2-QKVDLSTFSDEEV \*  
NH2-STGSYSLVTTQQPL \*  
NH2-SVFPIQSYSGNSEI \*  
NH2-SVGEM<Mox>AE \*  
NH2-SVGEMAENQFR- \*  
NH2-AILWM<Mox>IV \*  
NH2-AILWMIVPK-COC \*  
NH2-EGLNVLQYFISTH \*  
NH2-FATSDLNDLYR-C \*  
NH2-FTDM<Mox>IDG \*  
NH2-FTDMIDGQTITR- \*  
NH2-GLMAKPDGSIET \*  
NH2-GLPYSIVNQALGK \*

Stationary 1st Exp

Stationary 1st Exp

Stationary 1st Exp



NH2-IALASPDMIR-COI \*  
NH2-IGLLLDM<Mox>F \*  
NH2-LGIQAFEPVLEIGk \*  
NH2-LIDFGR-COOH \*  
NH2-LLDLAAPDIIVR-C \*  
NH2-LVITPVDGSDPYE \*  
NH2-M<Mox>GAEAIC \*  
NH2-MGAEAIQALLK-C \*  
NH2-QLNVFEGER-COC \*  
NH2-SVITVGPYLR-COC \*  
NH2-SWSFGEVK-COO \*  
NH2-VADLFEAR-COOH \*  
NH2-VIDIWAAANDR-C \*  
NH2-VTAEDVLKPGTAI \*  
NH2-YIVNEVQDVYR-C \*  
NH2-AIM<Mox>ASDL \*  
NH2-ASPSLLDGIVVEY \*  
NH2-IEAALADKEAELM \*  
NH2-KIEAALADKEALI \*  
NH2-VPLPPLTEER-COC \*  
#Gln->pyro-Glu (N-ter \*  
#Gln->pyro-Glu (N-ter \*  
#Gln->pyro-Glu (N-ter \*  
NH2-AFLPGSLVDVR-C \*  
NH2-AFLPGSLVDVRPV \*  
NH2-AKDEADEKDAIAT \*  
NH2-ANPWQQFAETH \*  
NH2-ANPWQQFAETH \*  
NH2-ANPWQQFAETH \*  
NH2-AVIESENSAERDC \*  
NH2-AVIESENSAERDC \*  
NH2-AYEDAETVTGVIN \*  
NH2-DQLLENLQEGM< \*  
NH2-DQLLENLQEGME \*  
NH2-DRVEDATLVLSVC \*  
NH2-DTLHLEGK-COOH \*  
NH2-DTLHLEGKELEFK \*  
NH2-DVVLVDAGLK-CC \*  
NH2-EYKKGDEIAAVVL \*  
NH2-GATVELADGVEG \*  
NH2-GDEIAAVVLQVD, \*  
NH2-GDEIAAVVLQVD, \*  
NH2-GGFTVELNGIR-C \*  
NH2-GVVVAIDKDVVLI \*  
NH2-GVVVAIDKDVVLI \*  
NH2-HEAWITLEK-COC \*  
NH2-HPSEIVNVGDEIT \*  
NH2-KGDEIAAVVLQVI \*

Stationary 1st Exp  
Stationary 1st Exp  
Stationary 1st Exp  
Stationary 1st Exp  
Stationary 1st Exp

Stationary 1st Exp

Stationary 1st Exp

Stationary 1st Exp

Stationary 1st Exp

Stationary 1st Exp

Stationary 1st Exp  
Stationary 1st Exp  
Stationary 1st Exp  
Stationary 1st Exp

|                         |                    |
|-------------------------|--------------------|
| NH2-KGDEIAAVVLQVI *     | Stationary 1st Exp |
| NH2-M<Mox>TESFAQ *      |                    |
| NH2-M<Mox>TESFAQ *      |                    |
| NH2-M<Mox>TESFAQ *      |                    |
| NH2-MTESFAQLFEESL *     |                    |
| NH2-MTESFAQLFEESL *     |                    |
| NH2-NLTDYGAFVDLG *      |                    |
| NH2-NLTDYGAFVDLG *      |                    |
| NH2-NLTDYGAFVDLG *      |                    |
| NH2-QEDANFSNNAM *       |                    |
| NH2-QEDANFSNNAM *       |                    |
| NH2-QLAEDPFNNWV *       | Stationary 1st Exp |
| NH2-QLAEDPFNNWV *       | Stationary 1st Exp |
| NH2-QLGEDPWVAIAK *      | Stationary 1st Exp |
| NH2-RAVIESENSAERD *     |                    |
| NH2-RAVIESENSAERD *     |                    |
| NH2-RHEAWITLEK-CO *     |                    |
| NH2-SESAIPAEQFK-CC *    |                    |
| NH2-TESFAQLFEESLK *     |                    |
| NH2-TESFAQLFEESLKE *    |                    |
| NH2-TRVSLGLK-COOH *     |                    |
| NH2-VEDATLVLSVGDE *     |                    |
| NH2-VKGGFTVELNGIR *     | Stationary 1st Exp |
| NH2-VKHPSEIVNVGDE *     |                    |
| NH2-VTNLTDYGC<Cm *      |                    |
| NH2-VVNVGDVVEVM *       |                    |
| NH2-VVNVGDVVEVM *       |                    |
| NH2-VVNVGDVVEVM *       |                    |
| NH2-VVNVGDVVEVM *       |                    |
| NH2-VVNVGDVVEVM *       |                    |
| NH2-ERFTVLISPHVNK *     |                    |
| NH2-FTVLISPHVNK-CC *    | Stationary 1st Exp |
| NH2-FTVLISPHVNKDA *     |                    |
| NH2-GPIPLPTR-COOH *     |                    |
| NH2-GPIPLPTRK-COOI *    |                    |
| NH2-LIDQATAEIVETAI *    | Stationary 1st Exp |
| NH2-LIDQATAEIVETAI *    | Stationary 1st Exp |
| NH2-LVDIVEPTEK-COC *    | Stationary 1st Exp |
| NH2-LVDIVEPTEKTVD *     |                    |
| #Gln->pyro-Glu (N-ter * |                    |
| #Gln->pyro-Glu (N-ter * |                    |
| NH2-ALNAAGFR-COOI *     |                    |
| NH2-KSTPFAAQVAAEI *     |                    |
| NH2-QGNALGWATAG *       |                    |
| NH2-QVSDGVAHIHAS *      |                    |
| NH2-STPFAAQVAAER *      |                    |
| NH2-ATVNQLVR-COO *      | Stationary 1st Exp |

|                         |                    |
|-------------------------|--------------------|
| NH2-GALDC<Cmm*>S *      | Stationary 1st Exp |
| NH2-GALDC<Cmm*>S *      |                    |
| NH2-LTNGFEVTSYIGG *     | Stationary 1st Exp |
| NH2-SNVPALEAC<Cm *      | Stationary 1st Exp |
| NH2-SNVPALEAC<Cm *      | Stationary 1st Exp |
| NH2-VKD<#Methylthi *    | Stationary 1st Exp |
| NH2-VRLTNGFEVTSYIK *    | Stationary 1st Exp |
| NH2-AILAAAGIAEDVK *     | Stationary 1st Exp |
| NH2-AILAAAGIAEDVK *     |                    |
| NH2-FVVEGDLR-COOH *     |                    |
| NH2-HAVIALTSIYGVGI *    | Stationary 1st Exp |
| NH2-IAGINIPDHK-COC *    |                    |
| NH2-IELSEGQIDTLR-( *    |                    |
| NH2-IELSEGQIDTLRD *     | Stationary 1st Exp |
| NH2-LM<Mox>DLGC< *      |                    |
| NH2-LMDLGC<Cmm*.* *     |                    |
| NH2-SKAILAAAGIAED' *    |                    |
| NH2-AIISDVNASDEDR *     |                    |
| NH2-RVALADKYFAK-C *     |                    |
| NH2-VALADKYFAK-CC *     |                    |
| NH2-DANDTGSTEVQV *      |                    |
| NH2-DANDTGSTEVQV *      |                    |
| NH2-IVSEFGR-COOH *      |                    |
| NH2-KLLDYLK-COOH *      |                    |
| NH2-KLLDYLKR-COOH *     |                    |
| NH2-LLDYLK-COOH *       |                    |
| NH2-LLDYLKR-COOH *      |                    |
| NH2-YTQLIER-COOH *      | Stationary 1st Exp |
| NH2-IAHWVGQGATIS *      |                    |
| NH2-KRPFYQVVVADSI *     |                    |
| NH2-PFYQVVVADSR-C *     |                    |
| NH2-RPFYQVVVADSR.* *    |                    |
| NH2-VGFFNPIASEK-CC *    | Stationary 1st Exp |
| NH2-VGFFNPIASEKEE( *    |                    |
| NH2-VGFFNPIASEKEE( *    |                    |
| NH2-LHVHDENNEC<C *      |                    |
| NH2-SIVVAIER-COOH *     |                    |
| NH2-TKSWTLVR-COOI *     |                    |
| NH2-FTAEGVQEIDYK-( *    | Stationary 1st Exp |
| NH2-FTAEGVQEIDYKD *     | Stationary 1st Exp |
| NH2-NYITESGK-COOH *     |                    |
| NH2-YLSLLPYTDR-COC *    | Stationary 1st Exp |
| NH2-YLSLLPYTDRHQ-( *    | Stationary 1st Exp |
| #Gln->pyro-Glu (N-ter * |                    |
| NH2-GPFIDLHLLK-COC *    | Stationary 1st Exp |
| NH2-KGPFIDLHLLK-CC *    |                    |
| NH2-LGEFAPTR-COOH *     |                    |
| NH2-QHVPVFTDEM< *       |                    |

NH2-RSTIFPNMIGLTIA \*  
NH2-STIFPNM<Mox>I \*  
NH2-STIFPNMIGLTIAV \*  
NH2-AASEAVKDAALSC \*  
NH2-AVTLYLGAVAATV \*  
NH2-AVTLYLGAVAATV \*  
NH2-DAALSC<Cmm\*> \*  
NH2-DLETQSQDGTFD \*  
NH2-DM<Mox>GGLPI \*  
NH2-DMGGLPDALFVII \*  
NH2-EANNLGIPVFAIV \*  
NH2-ELEKLENSLGGIK- \*  
NH2-ILFVGTK-COOH \*  
NH2-ILFVGTKR-COOH \*  
NH2-LENSLGGIK-COO \*  
NH2-LENSLGGIKDM<I \*  
NH2-LENSLGGIKDMGI \*  
NH2-LKDLETQSQDGTI \*  
NH2-LKDLETQSQDGTI \*  
NH2-M<Mox>KPFIFGI \*  
NH2-MKPFIFGAR-COC \*  
NH2-NKVHIINLEK-COC \*  
NH2-PFIFGAR-COOH \*  
NH2-RAASEAVKDAALS \*  
NH2-SQDLASQAEEFV \*  
NH2-TRELEKLENSLGG \*  
NH2-TVPM<Mox>FNE \*  
NH2-TVPMFNEALAEI \*  
NH2-VHIINLEK-COOH \*  
NH2-WLGGM<Mox>L \*  
NH2-WLGGMLTNWK- \*  
NH2-AFNEM<Mox>QI \*  
NH2-AFNEMQPIVDR-( \*  
NH2-ANLTAQINK-COC \*  
NH2-ANLTAQINKLA-C \*  
NH2-HKANLTAQINK-C \*  
NH2-KVYAAIEAGDKA/ \*  
NH2-KVYAAIEAGDK-C \*  
NH2-VYAAIEAGDKAA/ \*  
NH2-VYAAIEAGDK-CO \*  
NH2-AGVLAEVR-COOI \*  
NH2-EFYEKPTTER-COC \*  
NH2-ENEPFDVALR-CO \*  
NH2-VRENEPFDVALR- \*  
NH2-VRENEPFDVALRF \*  
NH2-ADIDYNTSEAHTT \*  
NH2-EFADNLDSDFK-C \*  
NH2-EFADNLDSDFKVF \*

Stationary 1st Exp  
Stationary 1st Exp

NH2-GEILGGM<Mox> \*  
NH2-GEILGGMAAVEQ \*  
NH2-KVVADIAGVPAQ \*  
NH2-LGIVKPWNSTWF \*  
NH2-LVADSITSQLER-C \*  
NH2-VPLHTLR-COOH \*  
NH2-VVADIAGVPAQIN \*  
NH2-VWIFK-COOH \*  
NH2-VWIFKGEILGGM· \*  
NH2-VWIFKGEILGGM. \*  
NH2-AALELAEQR-COC \*  
NH2-AVLEVAGVHNVL \*  
NH2-EGTDLFLK-COOH \*  
NH2-EKPTWLEVDAGK \*  
NH2-EKPTWLEVDAGK \*  
NH2-EKPTWLEVDAGK \*  
NH2-GNTGENLLALLEG \*  
NH2-IYGVLER-COOH \*  
NH2-LDNVVYR-COOH \*  
NH2-LKGNTGENLLALL \*  
NH2-LKGNTGENLLALL \*  
NH2-LSDYGVQLR-COC \*  
NH2-REGTDLFLK-COO \*  
NH2-RIYGVLER-COOH \*  
NH2-SDLSADINEHLIVE \*  
NH2-VKAALELAEQR-C \*  
NH2-VVNIASYQVSPNI \*  
NH2-ATIDGLENM<Mc \*  
NH2-ATIDGLENM<Mc \*  
NH2-ATIDGLENM<Mc \*  
NH2-ATIDGLENM<Mc \*  
NH2-ATIDGLENMNSP| \*  
NH2-ATIDGLENMNSP| \*  
NH2-ATIDGLENMNSP| \*  
NH2-AVLEVAGVHNVL \*  
NH2-AYGSTNPINVVR- \*  
NH2-IFSFTALTVVGDG \*  
NH2-IFSFTALTVVGDG \*  
NH2-NM<Mox>INVAL \*  
NH2-NMINVALNNGTL \*  
NH2-RNMINVALNNGT \*  
NH2-SVEEILGK-COOH \*  
NH2-TVKGGRIFSFTAL \*  
NH2-VFM<Mox>QPAS \*  
NH2-VFM<Mox>QPAS \*  
NH2-VFMQPASEGTGI| \*  
NH2-VFMQPASEGTGI| \*

Stationary 1st Exp

Stationary 1st Exp

Stationary 1st Exp

|                         |                    |
|-------------------------|--------------------|
| NH2-AHYVLM<Mox>M *      |                    |
| NH2-AHYVLMNVEAPC *      |                    |
| NH2-FNDAVIR-COOH *      | Stationary 1st Exp |
| NH2-HAVTEASPM<Mox>M *   |                    |
| NH2-HAVTEASPMVK-I *     |                    |
| NH2-HYEIVFMVHPDQ *      |                    |
| NH2-RQLAYPINK-COO *     |                    |
| NH2-YTAAITGAEGK-CI *    |                    |
| #Gln->pyro-Glu (N-ter * |                    |
| NH2-FGSELLAK-COOH *     |                    |
| NH2-FVNILM<Mox>VI *     | Stationary 1st Exp |
| NH2-FVNILM<Mox>VI *     | Stationary 1st Exp |
| NH2-FVNILMVDGK-CC *     |                    |
| NH2-FVNILMVDGKK-C *     |                    |
| NH2-KSTAESIVYSALET *    | Stationary 1st Exp |
| NH2-LANELSDAAENK- *     |                    |
| NH2-LANELSDAAENKC *     | Stationary 1st Exp |
| NH2-QPALGYLN-COOI *     |                    |
| NH2-SELEAFEVALENV *     | Stationary 1st Exp |
| NH2-SGKSELEAFEVALI *    | Stationary 1st Exp |
| NH2-STAESIVYSALETL *    | Stationary 1st Exp |
| NH2-VGGSTYQVPVEV *      |                    |
| NH2-VGGSTYQVPVEV *      | Stationary 1st Exp |
| NH2-VGGSTYQVPVEV *      |                    |
| NH2-WIVEAAR-COOH *      |                    |
| #Gln->pyro-Glu (N-ter * |                    |
| NH2-AVVESIQR-COOH *     |                    |
| NH2-EEGFIEDFKVEGD *     |                    |
| NH2-KDELPKVM<Mox> *     |                    |
| NH2-KDELPKVMAGLG *      |                    |
| NH2-LKVAIANVLK-COI *    |                    |
| NH2-QAGLGGEIIC<Cr *     |                    |
| NH2-SM<Mox>QDPIA *      |                    |
| NH2-SM<Mox>QDPIA *      | Stationary 1st Exp |
| NH2-SMQDPIADM<M *       |                    |
| NH2-SMQDPIADMLTF *      |                    |
| NH2-VAIANVLK-COOH *     |                    |
| NH2-VAIANVLKEEGFIE *    |                    |
| NH2-VEGDTKPELETLI *     |                    |
| NH2-VM<Mox>AGLGI *      | Stationary 1st Exp |
| NH2-VMAGLGIADVST: *     | Stationary 1st Exp |
| #Gln->pyro-Glu (N-ter * |                    |
| NH2-AENQYYGTGR-CI *     |                    |
| NH2-ALM<Mox>EYDE *      |                    |
| NH2-ALM<Mox>EYDE *      | Stationary 1st Exp |
| NH2-ALMEYDESLR-CC *     | Stationary 1st Exp |
| NH2-ALMEYDESLRSEL *     |                    |



|                          |                        |                    |
|--------------------------|------------------------|--------------------|
| NH2-GGGISGQAGAIR-*       |                        |                    |
| NH2-LDLYITVK-COOH *      |                        |                    |
| NH2-QPLELVDM<Mox> *      |                        |                    |
| NH2-QPLELVDM<Mox> *      |                        |                    |
| NH2-QPLELVDMVEK-C *      |                        |                    |
| NH2-SLEQYFGR-COOH *      |                        | Stationary 1st Exp |
| NH2-ALLQELC<Cmm>* *      |                        |                    |
| NH2-DSWLALLDEAGM *       |                        |                    |
| NH2-DSWLALLDEAGM *       |                        |                    |
| NH2-GFPHADYPDAVR *       |                        |                    |
| NH2-GLINGVLR-COOH *      |                        |                    |
| NH2-ILLDAPC<Cmm>* *      |                        |                    |
| NH2-QNLPGAEEGDGF *       |                        |                    |
| NH2-QQEELLAEFNASI *      |                        |                    |
| NH2-TADAELC<Cmm>* *      |                        |                    |
| NH2-TGGTLVYATC<Cr> *     |                        |                    |
| NH2-TLSQLDWLINK-C *      |                        |                    |
| NH2-TTHILEVAPEAQV *      |                        |                    |
| NH2-YPSQWC<Cmm>* *       |                        |                    |
| NH2-ATLAANGVEGEV *       |                        |                    |
| NH2-DGLDVGSQLLLST *      |                        |                    |
| NH2-FWGEYSVDGLTV *       |                        |                    |
| NH2-ILFAGDLQDDLPA *      |                        |                    |
| NH2-IVANAFLPYPDVL *      |                        |                    |
| NH2-LTLC<Cmm>* >DV *     |                        |                    |
| NH2-SAEQM<Mox>LA *       |                        |                    |
| NH2-SAFTPASEVLLR-C *     |                        |                    |
| NH2-VLDVGC<Cmm>* *       |                        |                    |
| NH2-LILSQLGEEGR-CC *     |                        |                    |
| NH2-FIAQQLGVSR-CO *      |                        |                    |
| NH2-TYLVTLLESPVADD *     |                        |                    |
| #Acetyl (Protein N-ter * |                        | Stationary 1st Exp |
| NH2-DISFEAPNAPHVF *      | Stationary 1st Control | Stationary 1st Exp |
| NH2-LDLDTASSQLADE *      |                        |                    |
| NH2-M<Mox>NIAGAS *       |                        | Stationary 1st Exp |
| NH2-AELLYGVIDNSDF *      | Stationary 1st Control | Stationary 1st Exp |
| NH2-ALTDPMVEFER-C *      |                        | Stationary 1st Exp |
| NH2-AQIFNFSSGPAM- *      | Stationary 1st Control | Stationary 1st Exp |
| NH2-ASIYNAM<Mox> *       | Stationary 1st Control | Stationary 1st Exp |
| NH2-GQFAAVPLNILGI *      | Stationary 1st Control | Stationary 1st Exp |
| NH2-NIGPAGLTIVIVR- *     |                        | Stationary 1st Exp |
| NH2-YC<Cmm>* >TPNV *     |                        | Stationary 1st Exp |
| NH2-TGVSNTLENEFK-I *     |                        |                    |
| NH2-TGVSNTLENEFKC *      |                        |                    |
| NH2-DLVVSLAYQVR-C *      |                        | Stationary 1st Exp |
| NH2-DVFM<Mox>GVI *       | Stationary 1st Control | Stationary 1st Exp |
| NH2-DVFM<Mox>GVI *       |                        | Stationary 1st Exp |
| NH2-DVFMGVDELQVC *       |                        |                    |

|                       |                        |                    |
|-----------------------|------------------------|--------------------|
| NH2-FLAETDQGPVPI *    | Stationary 1st Control |                    |
| NH2-FNVEVVAIR-COC *   | Stationary 1st Control | Stationary 1st Exp |
| NH2-VPKDVFM<Mox> *    | Stationary 1st Control | Stationary 1st Exp |
| NH2-VPKDVFM<Mox> *    |                        | Stationary 1st Exp |
| NH2-AQFTDAAIK-COC *   |                        | Stationary 1st Exp |
| NH2-DALAPHISAETIEY *  | Stationary 1st Control | Stationary 1st Exp |
| NH2-HHQTYVTNLNNL *    | Stationary 1st Control | Stationary 1st Exp |
| NH2-NFGSGWTWLVK *     | Stationary 1st Control | Stationary 1st Exp |
| NH2-SFELPALPYAK-CC *  | Stationary 1st Control | Stationary 1st Exp |
| NH2-SLEEIR-COOH *     |                        | Stationary 1st Exp |
| NH2-VAEAIASFGSFA *    | Stationary 1st Control | Stationary 1st Exp |
| NH2-DFGSVDNFK-COC *   |                        |                    |
| NH2-EFWNVVNWDEA *     |                        |                    |
| NH2-FGSGWAWLVLK *     |                        | Stationary 1st Exp |
| NH2-SSVNNPTGR-CC *    |                        |                    |
| NH2-AVLVNIFGGIVR-C *  |                        | Stationary 1st Exp |
| NH2-GLTDAAQQVVA *     |                        | Stationary 1st Exp |
| NH2-GGTTHLGLPVFN *    |                        | Stationary 1st Exp |
| NH2-GTADEKFAALEA *    |                        | Stationary 1st Exp |
| NH2-FGFLLDALK-COO *   |                        | Stationary 1st Exp |
| NH2-FAPSPTGYLHVGC *   |                        | Stationary 1st Exp |
| NH2-TALYSWLFAR-CC *   | Stationary 1st Control | Stationary 1st Exp |
| NH2-ELGPEPM<Mox> *    |                        | Stationary 1st Exp |
| NH2-ELGPEPMAAAYV *    |                        | Stationary 1st Exp |
| NH2-TFQGLLTLQDYW *    |                        | Stationary 1st Exp |
| NH2-ANDIVVALLQEK- *   |                        | Stationary 1st Exp |
| NH2-AYEAYDFHEVVQ *    |                        | Stationary 1st Exp |
| NH2-GAELELLR-COOH *   |                        | Stationary 1st Exp |
| NH2-IGVTDYITILGTVK- * |                        | Stationary 1st Exp |
| NH2-ASFVTLQDVGGR *    |                        | Stationary 1st Exp |
| NH2-ALAESIGITVEK-CI * |                        | Stationary 1st Exp |
| NH2-DSLPEGVYNDQFI *   |                        | Stationary 1st Exp |
| NH2-GANEAIDFNDEL *    |                        | Stationary 1st Exp |
| NH2-WDLGDIIGAR-CC *   | Stationary 1st Control | Stationary 1st Exp |
| NH2-YLDLIANDK-COO *   |                        | Stationary 1st Exp |
| NH2-YRPETDM<Mox> *    |                        | Stationary 1st Exp |
| NH2-EGYFC<Cmm*>L *    |                        | Stationary 1st Exp |
| NH2-LNLEYTVMSK-CC *   |                        | Stationary 1st Exp |
| NH2-SVEENLALFEK-CC *  |                        | Stationary 1st Exp |
| NH2-AELDALQAEIR-CI *  |                        | Stationary 1st Exp |
| NH2-EFDFEVR-COOH *    |                        | Stationary 1st Exp |
| NH2-VLQLLGLPYR-CO *   |                        | Stationary 1st Exp |
| NH2-PVITLPDGSQR-CI *  |                        | Stationary 1st Exp |
| NH2-AEM<Mox>NIAP *    |                        | Stationary 1st Exp |
| NH2-FTLAALASTGR-CI *  |                        | Stationary 1st Exp |
| NH2-YVILPLVNR-COOI *  |                        | Stationary 1st Exp |
| NH2-AAGLSQYEHLIDD *   |                        | Stationary 1st Exp |
| NH2-AC<Cmm*>AEAC *    | Stationary 1st Control | Stationary 1st Exp |

|                           |                        |                        |
|---------------------------|------------------------|------------------------|
| NH2-KLEDLLAAKL-COOH *     | Stationary 1st Control |                        |
| NH2-LTIAPNLLK-COOH *      |                        | Stationary 1st Exp     |
| NH2-QFTTVVADSGDIE *       | Stationary 1st Control |                        |
| NH2-AQQIVDATDKLAH *       |                        | Stationary 1st Exp     |
| NH2-ELAESEGAIER-CC *      |                        | Stationary 1st Exp     |
| NH2-KLIDDAVAWAK-COOH *    | Stationary 1st Control | Stationary 1st Exp     |
| NH2-LASTWQGIR-COOH *      |                        | Stationary 1st Exp     |
| NH2-LAVNIGLEILK-COOH *    |                        | Stationary 1st Exp     |
| NH2-LIDDAVAWAK-CC *       | Stationary 1st Control | Stationary 1st Exp     |
| NH2-LTIAPALLK-COOH *      |                        | Stationary 1st Exp     |
| NH2-LYQPQDATTNPSI *       |                        | Stationary 1st Exp     |
| NH2-M<Mox>IGDLL-COOH *    | Stationary 1st Control | Stationary 1st Exp     |
| NH2-NIGEILELAGC<Cr> *     | Stationary 1st Control | Stationary 1st Exp     |
| NH2-QYTTVVADTGDIAH *      | Stationary 1st Control | Stationary 1st Exp     |
| NH2-QYTTVVADTGDIAH *      | Stationary 1st Control | Stationary 1st Exp     |
| NH2-DVKLEIEIAIVR-COOH *   |                        | Stationary 1st Exp     |
| NH2-LEIEIAIVR-COOH *      | Stationary 1st Control | Stationary 1st Exp     |
| NH2-KPIIYDVETLR-COOH *    |                        | Stationary 1st Exp     |
| NH2-QVFGGQVVGQA *         |                        | Stationary 1st Exp     |
| NH2-GIPTLLLFK-COOH *      |                        | Stationary 1st Exp     |
| NH2-GQLKEFLDANLAH *       |                        | Stationary 1st Exp     |
| NH2-ANDIDVPAALIDS *       |                        |                        |
| NH2-ANDIDVPAALIDS *       |                        | Stationary 1st Exp     |
| NH2-ASDFVLAMGQGF *        |                        | Stationary 1st Exp     |
| NH2-ELPELTAEFIK-COOH *    |                        |                        |
| NH2-FGVEDGSVEGLRH *       |                        | Stationary 1st Exp     |
| NH2-FGVEDGSVEGLRH *       |                        |                        |
| NH2-INPAGAPTYVPGEH *      | Stationary 1st Control | Stationary 1st Exp     |
| NH2-NFIDAIIEKEK-COOH *    |                        | Stationary 1st Exp     |
| NH2-NVALEEQAVEAV *        |                        | Stationary 1st Exp     |
| NH2-QDVLGDLMSR-COOH *     |                        |                        |
| NH2-VVVGLLLGEVIR-COOH *   | Stationary 1st Control | Stationary 1st Exp     |
| NH2-AINEDAAGNYIHY *       | Stationary 1st Control | Stationary 1st Exp     |
| NH2-QDGPTALILSR-CC *      |                        | Stationary 1st Exp     |
| NH2-VAVEAGIADYWY *        |                        | Stationary 1st Exp     |
| NH2-VVSMPSTDAFDK *        |                        | Stationary 1st Exp     |
| NH2-ATYTQTHM<Mo> *        |                        | Stationary 1st Exp     |
| NH2-AVEIGSFLGR-CC *       | Stationary 1st Control | Stationary 1st Exp     |
| NH2-EAEYKDWTIEQIT *       |                        | Stationary 1st Exp     |
| NH2-FAENAYFIK-COOH *      | Stationary 1st Control | Stationary 1st Exp     |
| NH2-GAEQIYIPVLIK-COOH *   |                        | Stationary 1st Exp     |
| NH2-GLTFTYEPK-COOH *      |                        | Stationary 1st Exp     |
| NH2-GNFDLEGLER-CC *       | Stationary 1st Control | Stationary 1st Exp     |
| NH2-LLPHIPADQFPAC *       |                        | Stationary 1st Exp     |
| NH2-SYYALAESVK-COOH *     |                        | Stationary 1st Exp     |
| NH2-YADMLAMSAK-COOH *     |                        | Stationary 1st Exp     |
| NH2-LFNAAK-COOH *         | Stationary 1st Control | Stationary 2nd Control |
| #Gln->pyro-Glu (N-term) * |                        | Stationary 2nd Control |

|                       |   |                        |
|-----------------------|---|------------------------|
| NH2-LAYVTFESGR-CO     | * | Stationary 1st Exp     |
| NH2-APLVEELYR-COO     | * | Stationary 1st Exp     |
| NH2-AQTFTLVAK-COC     | * | Stationary 1st Exp     |
| NH2-DLSDVTLGQFAGI     | * | Stationary 1st Control |
| NH2-FC<Cmm*>GAEC      | * | Stationary 1st Exp     |
| NH2-NAEFLQAYGVAIA     | * | Stationary 1st Exp     |
| NH2-SQTVHFQGNPVT      | * | Stationary 1st Control |
| NH2-VLNIFPSIDTGVC<    | * | Stationary 1st Exp     |
| NH2-DADELLAILASK-C    | * | Stationary 1st Exp     |
| NH2-LDVVNLISKDPR-(    | * | Stationary 1st Exp     |
| NH2-NDGRDADELLAIL     | * | Stationary 1st Exp     |
| NH2-VC<Cmm*>EFW,      | * | Stationary 1st Exp     |
| NH2-ANLQPVLITGM<I     | * | Stationary 1st Exp     |
| NH2-LLILGSGPAGYTA/    | * | Stationary 1st Exp     |
| NH2-QAITSAGTGC<Cr     | * | Stationary 1st Exp     |
| NH2-AVAFALFGLQDR-     | * | Stationary 1st Exp     |
| NH2-IGTTGAIQPHINV/    | * | Stationary 1st Control |
| NH2-NDLQGATLAIVPC     | * | Stationary 1st Exp     |
| NH2-NDLQGATLAIVPC     | * | Stationary 1st Control |
| NH2-SDVFHLGLTK-CO     | * | Stationary 1st Control |
| NH2-SIGATTHVGVITAS    | * | Stationary 1st Control |
| NH2-VLVLVAAPEGIAA     | * | Stationary 1st Exp     |
| NH2-AYKHILIAVDLSPE    | * | Stationary 1st Exp     |
| NH2-HILIAVDLSPESK-(   | * | Stationary 1st Exp     |
| NH2-QLINTVHVDM<N      | * | Stationary 1st Exp     |
| NH2-HANLPVLVVR-CC     | * | Stationary 1st Exp     |
| NH2-LQTM<Mox>VSH      | * | Stationary 1st Exp     |
| NH2-NPSISTHLLGSNA/    | * | Stationary 1st Exp     |
| #Gln->pyro-Glu (N-ter | * | Stationary 1st Exp     |
| NH2-GGTPYGATTIAGC     | * | Stationary 1st Exp     |
| NH2-RVPETM<Mox>P      | * | Stationary 1st Exp     |
| NH2-TFLDQTGGLWAS      | * | Stationary 1st Exp     |
| NH2-TQTAPVATPQEL/     | * | Stationary 1st Exp     |
| NH2-YQGEYVAGLAVK      | * | Stationary 1st Control |
| NH2-GGLVPGALLAR-C     | * | Stationary 1st Exp     |
| NH2-EALMSALAQTR-C     | * |                        |
| NH2-VIAALSSTLTSR-(    | * |                        |
| NH2-SPEVFNLM<Mo>      | * | Stationary 1st Exp     |
| NH2-GGDLGQPFQFK-(     | * | Stationary 1st Control |
| NH2-GIEGSSLDVPENIV    | * | Stationary 1st Exp     |
| NH2-NVEASFELNDASK     | * | Stationary 1st Exp     |
| NH2-PSFDIVSEVDLQE.    | * | Stationary 1st Exp     |
| NH2-SRDDLQAVM<M       | * | Stationary 1st Exp     |
| NH2-TWFVEAK-COOH      | * | Stationary 1st Exp     |
| NH2-VLSESDFQVNQLI     | * | Stationary 1st Exp     |
| NH2-LATPFAEGEALR-(    | * | Stationary 1st Exp     |
| NH2-LQVEQIIAVSNETI    | * |                        |
| NH2-TMFIGGLQGAK-C     | * |                        |

|                          |                        |                    |
|--------------------------|------------------------|--------------------|
| NH2-NNVLALGDLAK-C *      |                        | Stationary 1st Exp |
| #Acetyl (Protein N-ter * |                        | Stationary 1st Exp |
| NH2-AALASALGEYFER *      |                        | Stationary 1st Exp |
| NH2-DAALEDSIAR-CO *      |                        |                    |
| NH2-ELLGLATGSDNGV *      |                        | Stationary 1st Exp |
| NH2-GIC<Cmm*>GLP *       |                        | Stationary 1st Exp |
| NH2-IIAESISLPEIPADV *    |                        | Stationary 1st Exp |
| NH2-IIVPGM<Mox>SE *      |                        | Stationary 1st Exp |
| NH2-KAALASALGEYFE *      |                        | Stationary 1st Exp |
| NH2-TQTFIPGKDAALE *      |                        | Stationary 1st Exp |
| NH2-TVTELLQGR-COC *      |                        | Stationary 1st Exp |
| NH2-VQGLSEVFER-CO *      |                        | Stationary 1st Exp |
| NH2-VRELLGLATGSDN *      |                        | Stationary 1st Exp |
| NH2-WFPLTENDDVPE *       |                        |                    |
| NH2-WFPLTENDDVPE *       |                        | Stationary 1st Exp |
| NH2-AGVLALNIQR-CO *      |                        |                    |
| NH2-DWLNVTQAQR-C *       |                        |                    |
| NH2-LLISGDVIFK-COO *     |                        | Stationary 1st Exp |
| NH2-VKLPLTLDPVR-CC *     |                        |                    |
| NH2-LILASTSPWR-CO *      |                        | Stationary 1st Exp |
| NH2-SEGFGITLFFER-CO *    |                        | Stationary 1st Exp |
| NH2-ELISGFADYVLQR *      |                        | Stationary 1st Exp |
| NH2-QWFGFISQSR-C *       |                        | Stationary 1st Exp |
| NH2-LC<Cmm*>HIIW *       |                        | Stationary 1st Exp |
| NH2-ILSIDTEGLTAEQII *    |                        | Stationary 1st Exp |
| NH2-AENTVVTGAGWI *       |                        | Stationary 1st Exp |
| NH2-LGTDGLQLYSSGK *      |                        | Stationary 1st Exp |
| NH2-APLIITVVAK-COC *     | Stationary 1st Control | Stationary 1st Exp |
| NH2-LAEPAPTGEQLQI *      |                        | Stationary 1st Exp |
| NH2-MDALELLINR-CO *      |                        | Stationary 1st Exp |
| NH2-IAQPELVNFR-CO *      |                        | Stationary 1st Exp |
| NH2-LIALLSQEGADFR *      |                        | Stationary 1st Exp |
| NH2-TDDILAILTEQQFF *     |                        |                    |
| NH2-GEIFHFNPGSVSIF *     |                        | Stationary 1st Exp |
| NH2-AEAEQTLAALTEK *      | Stationary 1st Control | Stationary 1st Exp |
| NH2-DAIIDDLKAR-CO *      |                        |                    |
| NH2-EAVAERDAIIDDL *      |                        |                    |
| NH2-EAVAERDAIIDDL *      |                        |                    |
| NH2-GLISVEQEIK-COC *     |                        |                    |
| NH2-IAELEAALANK-CC *     |                        |                    |
| NH2-ITVLDNDGNRKPI *      |                        |                    |
| NH2-LITLLPNWIDK-CC *     |                        |                    |
| NH2-LITLLPNWIDKLG *      |                        |                    |
| NH2-QVPAAEEM<M *         |                        |                    |
| NH2-AWFIQSVTPR-CC *      |                        |                    |
| NH2-GVVVQDAALLES *       |                        |                    |
| NH2-M<Mox>VLVLGC *       |                        |                    |
| NH2-MVLVLGQYEGL *        |                        |                    |

|                      |                        |                    |
|----------------------|------------------------|--------------------|
| NH2-TAEGGAEHVQPI*    |                        |                    |
| NH2-VYGENAC<Cmm*     |                        |                    |
| NH2-AALANLSELPK*     |                        | Stationary 1st Exp |
| NH2-AALANLSELPKI*    |                        | Stationary 1st Exp |
| NH2-ALWLLAGSASR-C*   | Stationary 1st Control | Stationary 1st Exp |
| NH2-DGDGFAWIER-C*    |                        | Stationary 1st Exp |
| NH2-LPEAGEDLELK-CC*  |                        | Stationary 1st Exp |
| NH2-VLLGVAGFQAR-C*   | Stationary 1st Control | Stationary 1st Exp |
| NH2-AYSEAVKGDVLEI*   |                        | Stationary 1st Exp |
| NH2-M<Mox>LTVIAEI*   |                        | Stationary 1st Exp |
| NH2-MLTVIAEIR-COO*   |                        | Stationary 1st Exp |
| NH2-GVGQYLLEEVLR*    |                        | Stationary 1st Exp |
| NH2-VTLSGTEGALDSL*   |                        | Stationary 1st Exp |
| NH2-FFATREEAESFM<*   |                        | Stationary 1st Exp |
| NH2-FWPDKEAILYDAL*   |                        | Stationary 1st Exp |
| NH2-LLELQGIANTTLEI*  |                        | Stationary 1st Exp |
| NH2-YLSQQIDVWR-CC*   |                        | Stationary 1st Exp |
| NH2-ANPEQLEEQRREE*   |                        | Stationary 1st Exp |
| NH2-AIVEAAGLK-COO*   |                        | Stationary 1st Exp |
| NH2-AIVEAAGLKVGDI*   |                        | Stationary 1st Exp |
| NH2-DLNDFATVNATYI*   |                        | Stationary 1st Exp |
| NH2-DVKIEIEIAIVR-C*  |                        | Stationary 1st Exp |
| NH2-DVKIEIEIAIVRR-I* |                        | Stationary 1st Exp |
| NH2-IEIEIAIVR-COOH*  | Stationary 1st Control | Stationary 1st Exp |
| NH2-QSLDNVKAIVEA*    |                        | Stationary 1st Exp |
| NH2-TGEVPADVAAQA*    | Stationary 1st Control | Stationary 1st Exp |
| NH2-TPLWLASLIR-COC*  |                        | Stationary 1st Exp |
| NH2-ILGISLAQLR-COC*  |                        |                    |
| NH2-ELVADDATNTVYI*   |                        |                    |
| NH2-ESVIWVVDGGNII*   |                        |                    |
| NH2-LYTTNADGELITIC*  |                        |                    |
| NH2-VAAPESLAVLFNP*   |                        |                    |
| NH2-AWDAWVVAGH/*     |                        | Stationary 1st Exp |
| NH2-SSILDATIFLADKN*  |                        | Stationary 1st Exp |
| NH2-GFILHTPPSNFAS*   |                        | Stationary 1st Exp |
| NH2-LIGVDILTM<Mox*   |                        | Stationary 1st Exp |
| NH2-LADDVGIWPLVV*    |                        | Stationary 1st Exp |
| NH2-LESGYLYLGSPVK*   |                        | Stationary 1st Exp |
| NH2-VM<Mox>IDDSS*    |                        | Stationary 1st Exp |



Stationary 2nd Exp

Stationary 3rd Exp

Stationary 2nd Exp

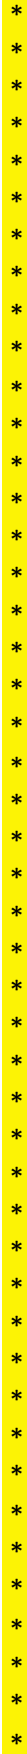

Stationary 2nd Exp

Stationary 2nd Exp

Stationary 2nd Exp

Stationary 3rd Exp





Stationary 2nd Exp

\*  
\*

Stationary 2nd Exp

Stationary 3rd Exp

\*  
\*

\*  
\*

\*  
\*

\*  
\*

\*  
\*

\*  
\*

\*  
\*

\*  
\*

\*  
\*

\*  
\*

\*  
\*

\*  
\*

\*  
\*

Stationary 2nd Exp  
Stationary 2nd Exp  
Stationary 2nd Exp  
Stationary 2nd Exp

Stationary 3rd Exp  
Stationary 3rd Exp  
Stationary 3rd Exp

Stationary 2nd Exp

Stationary 3rd Exp  
Stationary 3rd Exp

Stationary 2nd Exp

Stationary 2nd Exp

Stationary 3rd Exp  
Stationary 3rd Exp

Stationary 3rd Exp

Stationary 2nd Exp

Stationary 3rd Exp

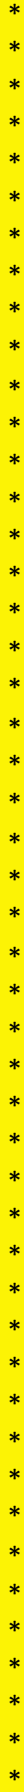

Stationary 2nd Exp

Stationary 3rd Exp

Stationary 2nd Exp

Stationary 3rd Exp

Stationary 2nd Exp

Stationary 3rd Exp

Stationary 2nd Exp

Stationary 3rd Exp

Stationary 2nd Exp

Stationary 2nd Exp

Stationary 2nd Exp

Stationary 3rd Exp

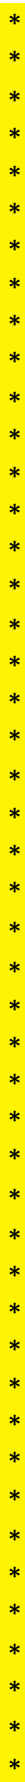





|                    |                    |   |
|--------------------|--------------------|---|
|                    | Stationary 3rd Exp | * |
| Stationary 2nd Exp | Stationary 3rd Exp | * |
|                    | Stationary 3rd Exp | * |
| Stationary 2nd Exp |                    | * |
|                    |                    | * |
| Stationary 2nd Exp |                    | * |
|                    |                    | * |
| Stationary 2nd Exp |                    | * |
|                    |                    | * |
|                    |                    | * |
|                    |                    | * |
|                    |                    | * |
| Stationary 2nd Exp | Stationary 3rd Exp | * |
|                    |                    | * |
|                    |                    | * |
| Stationary 2nd Exp |                    | * |
|                    |                    | * |
|                    |                    | * |
| Stationary 2nd Exp | Stationary 3rd Exp | * |
| Stationary 2nd Exp | Stationary 3rd Exp | * |
|                    |                    | * |
|                    |                    | * |
|                    |                    | * |
|                    |                    | * |
|                    |                    | * |
|                    |                    | * |
|                    | Stationary 3rd Exp | * |
| Stationary 2nd Exp |                    | * |
| Stationary 2nd Exp |                    | * |
| Stationary 2nd Exp |                    | * |



|                    |                    |   |
|--------------------|--------------------|---|
| Stationary 2nd Exp |                    | * |
| Stationary 2nd Exp |                    | * |
|                    | Stationary 3rd Exp | * |
|                    |                    | * |
|                    |                    | * |
|                    |                    | * |
|                    |                    | * |
|                    |                    | * |
| Stationary 2nd Exp | Stationary 3rd Exp | * |
| Stationary 2nd Exp | Stationary 3rd Exp | * |
|                    |                    | * |
| Stationary 2nd Exp |                    | * |
|                    |                    | * |
|                    |                    | * |
|                    |                    | * |
|                    |                    | * |
|                    | Stationary 3rd Exp | * |
|                    |                    | * |
|                    |                    | * |
|                    |                    | * |
|                    |                    | * |
|                    |                    | * |
|                    | Stationary 3rd Exp | * |
|                    | Stationary 3rd Exp | * |
|                    |                    | * |
|                    |                    | * |
|                    | Stationary 3rd Exp | * |
|                    |                    | * |
| Stationary 2nd Exp | Stationary 3rd Exp | * |
| Stationary 2nd Exp | Stationary 3rd Exp | * |
|                    |                    | * |
|                    |                    | * |
| Stationary 2nd Exp |                    | * |
| Stationary 2nd Exp | Stationary 3rd Exp | * |
|                    | Stationary 3rd Exp | * |
|                    |                    | * |
|                    | Stationary 3rd Exp | * |
|                    |                    | * |
|                    |                    | * |
|                    | Stationary 3rd Exp | * |

Stationary 2nd Exp  
Stationary 2nd Exp  
Stationary 2nd Exp  
Stationary 2nd Exp

Stationary 2nd Exp

Stationary 3rd Exp

Stationary 3rd Exp

Stationary 2nd Exp

Stationary 2nd Exp  
Stationary 2nd Exp  
Stationary 2nd Exp  
Stationary 2nd Exp

Stationary 3rd Exp  
Stationary 3rd Exp  
Stationary 3rd Exp

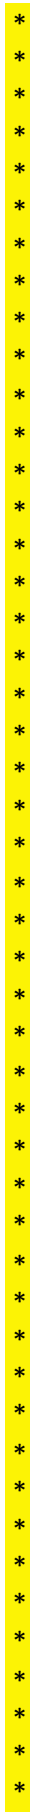

|                    |                    |   |
|--------------------|--------------------|---|
|                    | Stationary 3rd Exp | * |
| Stationary 2nd Exp | Stationary 3rd Exp | * |
| Stationary 2nd Exp | Stationary 3rd Exp | * |
| Stationary 2nd Exp | Stationary 3rd Exp | * |
| Stationary 2nd Exp | Stationary 3rd Exp | * |
| Stationary 2nd Exp | Stationary 3rd Exp | * |
| Stationary 2nd Exp | Stationary 3rd Exp | * |
| Stationary 2nd Exp | Stationary 3rd Exp | * |
|                    |                    | * |
|                    |                    | * |
|                    | Stationary 3rd Exp | * |
|                    |                    | * |
|                    | Stationary 3rd Exp | * |
|                    |                    | * |
|                    | Stationary 3rd Exp | * |
|                    | Stationary 3rd Exp | * |
|                    |                    | * |
| Stationary 2nd Exp | Stationary 3rd Exp | * |
|                    |                    | * |
|                    | Stationary 3rd Exp | * |
|                    | Stationary 3rd Exp | * |
|                    |                    | * |
|                    |                    | * |
|                    | Stationary 3rd Exp | * |
|                    | Stationary 3rd Exp | * |
|                    |                    | * |
|                    |                    | * |
| Stationary 2nd Exp |                    | * |
| Stationary 2nd Exp |                    | * |
| Stationary 2nd Exp |                    | * |
|                    |                    | * |
|                    |                    | * |
|                    | Stationary 3rd Exp | * |
|                    | Stationary 3rd Exp | * |
|                    |                    | * |
|                    |                    | * |
|                    |                    | * |
|                    | Stationary 3rd Exp | * |
|                    | Stationary 3rd Exp | * |
|                    |                    | * |
| Stationary 2nd Exp | Stationary 3rd Exp | * |
| Stationary 2nd Exp | Stationary 3rd Exp | * |
|                    |                    | * |
|                    |                    | * |





|                    |                    |   |
|--------------------|--------------------|---|
| Stationary 2nd Exp |                    | * |
| Stationary 2nd Exp | Stationary 3rd Exp | * |
|                    |                    | * |
| Stationary 2nd Exp | Stationary 3rd Exp | * |
|                    |                    | * |
|                    |                    | * |
| Stationary 2nd Exp |                    | * |
| Stationary 2nd Exp | Stationary 3rd Exp | * |
| Stationary 2nd Exp | Stationary 3rd Exp | * |
| Stationary 2nd Exp | Stationary 3rd Exp | * |
|                    |                    | * |
| Stationary 2nd Exp | Stationary 3rd Exp | * |
|                    |                    | * |
| Stationary 2nd Exp | Stationary 3rd Exp | * |
| Stationary 2nd Exp | Stationary 3rd Exp | * |
| Stationary 2nd Exp | Stationary 3rd Exp | * |
|                    |                    | * |
|                    |                    | * |
|                    |                    | * |
|                    |                    | * |
|                    |                    | * |
|                    |                    | * |
|                    |                    | * |
|                    |                    | * |
|                    |                    | * |
|                    |                    | * |
|                    |                    | * |
|                    |                    | * |
|                    |                    | * |
| Stationary 2nd Exp | Stationary 3rd Exp | * |
| Stationary 2nd Exp |                    | * |
| Stationary 2nd Exp | Stationary 3rd Exp | * |
| Stationary 2nd Exp |                    | * |

Stationary 2nd Exp  
Stationary 2nd Exp  
Stationary 2nd Exp  
Stationary 2nd Exp  
Stationary 2nd Exp

Stationary 3rd Exp  
Stationary 3rd Exp  
Stationary 3rd Exp  
Stationary 3rd Exp  
Stationary 3rd Exp  
Stationary 3rd Exp  
Stationary 3rd Exp  
Stationary 3rd Exp

Stationary 3rd Exp

Stationary 2nd Exp  
Stationary 2nd Exp

Stationary 2nd Exp

Stationary 3rd Exp  
Stationary 3rd Exp  
Stationary 3rd Exp

Stationary 2nd Exp

Stationary 3rd Exp

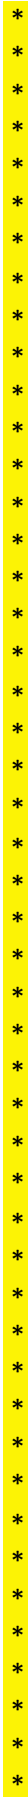

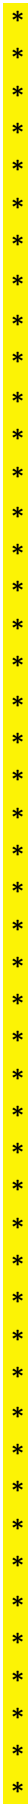

Stationary 2nd Exp

Stationary 3rd Exp

Stationary 3rd Exp

Stationary 3rd Exp

Stationary 3rd Exp



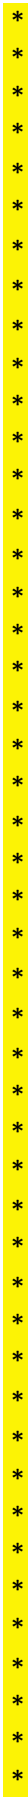

Stationary 2nd Exp

Stationary 2nd Exp

Stationary 2nd Exp

Stationary 3rd Exp



Stationary 2nd Exp

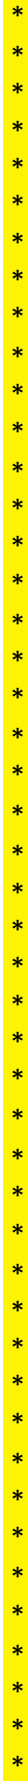

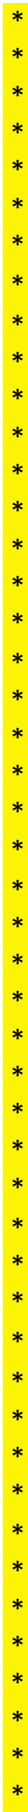

Stationary 3rd Exp  
Stationary 3rd Exp  
Stationary 3rd Exp

Stationary 2nd Exp

Stationary 2nd Exp

Stationary 3rd Exp

Stationary 2nd Exp

Stationary 3rd Exp

Stationary 2nd Exp

Stationary 3rd Exp

Stationary 3rd Exp

Stationary 3rd Exp

Stationary 2nd Exp

Stationary 3rd Exp

Stationary 2nd Exp

Stationary 2nd Exp

Stationary 3rd Exp

Stationary 3rd Exp

Stationary 3rd Exp

Stationary 2nd Exp

Stationary 3rd Exp

Stationary 3rd Exp

Stationary 2nd Exp

Stationary 2nd Exp

Stationary 2nd Exp

Stationary 3rd Exp

Stationary 3rd Exp

Stationary 2nd Exp

Stationary 3rd Exp

Stationary 2nd Exp  
Stationary 2nd Exp  
Stationary 2nd Exp

Stationary 3rd Exp

Stationary 2nd Exp

Stationary 3rd Exp  
Stationary 3rd Exp  
Stationary 3rd Exp

Stationary 3rd Exp

Stationary 3rd Exp

Stationary 2nd Exp

Stationary 2nd Exp

Stationary 2nd Exp  
Stationary 2nd Exp  
Stationary 2nd Exp

Stationary 3rd Exp

Stationary 3rd Exp

Stationary 3rd Exp

Stationary 3rd Exp  
Stationary 3rd Exp  
Stationary 3rd Exp  
Stationary 3rd Exp

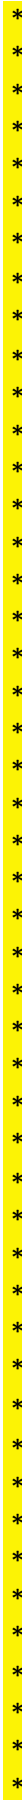

|                    |                    |   |
|--------------------|--------------------|---|
| Stationary 2nd Exp | Stationary 3rd Exp | * |
|                    | Stationary 3rd Exp | * |
|                    | Stationary 3rd Exp | * |
|                    | Stationary 3rd Exp | * |
| Stationary 2nd Exp |                    | * |
| Stationary 2nd Exp |                    | * |
| Stationary 2nd Exp | Stationary 3rd Exp | * |
|                    |                    | * |
|                    | Stationary 3rd Exp | * |
| Stationary 2nd Exp |                    | * |
|                    | Stationary 3rd Exp | * |
| Stationary 2nd Exp | Stationary 3rd Exp | * |
| Stationary 2nd Exp | Stationary 3rd Exp | * |
|                    | Stationary 3rd Exp | * |
| Stationary 2nd Exp | Stationary 3rd Exp | * |
| Stationary 2nd Exp | Stationary 3rd Exp | * |
|                    | Stationary 3rd Exp | * |
| Stationary 2nd Exp |                    | * |
| Stationary 2nd Exp |                    | * |
| Stationary 2nd Exp | Stationary 3rd Exp | * |
| Stationary 2nd Exp |                    | * |
| Stationary 2nd Exp |                    | * |
|                    | Stationary 3rd Exp | * |
| Stationary 2nd Exp | Stationary 3rd Exp | * |
| Stationary 2nd Exp | Stationary 3rd Exp | * |
| Stationary 2nd Exp | Stationary 3rd Exp | * |
|                    | Stationary 3rd Exp | * |
| Stationary 2nd Exp | Stationary 3rd Exp | * |
| Stationary 2nd Exp | Stationary 3rd Exp | * |
| Stationary 2nd Exp | Stationary 3rd Exp | * |
| Stationary 2nd Exp | Stationary 3rd Exp | * |







|                    |                    |   |
|--------------------|--------------------|---|
| Stationary 2nd Exp | Stationary 3rd Exp | * |
| Stationary 2nd Exp |                    | * |
| Stationary 2nd Exp |                    | * |
| Stationary 2nd Exp |                    | * |
| Stationary 2nd Exp | Stationary 3rd Exp | * |
| Stationary 2nd Exp |                    | * |
| Stationary 2nd Exp | Stationary 3rd Exp | * |
| Stationary 2nd Exp |                    | * |
| Stationary 2nd Exp | Stationary 3rd Exp | * |
| Stationary 2nd Exp |                    | * |
| Stationary 2nd Exp |                    | * |
| Stationary 2nd Exp |                    | * |
| Stationary 2nd Exp | Stationary 3rd Exp | * |
| Stationary 2nd Exp |                    | * |
| Stationary 2nd Exp |                    | * |
| Stationary 2nd Exp |                    | * |
| Stationary 2nd Exp | Stationary 3rd Exp | * |
| Stationary 2nd Exp | Stationary 3rd Exp | * |
| Stationary 2nd Exp |                    | * |
| Stationary 2nd Exp | Stationary 3rd Exp | * |
| Stationary 2nd Exp |                    | * |
| Stationary 2nd Exp | Stationary 3rd Exp | * |
| Stationary 2nd Exp | Stationary 3rd Exp | * |
| Stationary 2nd Exp | Stationary 3rd Exp | * |
| Stationary 2nd Exp |                    | * |

|                    |                    |   |
|--------------------|--------------------|---|
| Stationary 2nd Exp |                    | * |
| Stationary 2nd Exp |                    | * |
| Stationary 2nd Exp | Stationary 3rd Exp | * |
| Stationary 2nd Exp | Stationary 3rd Exp | * |
| Stationary 2nd Exp |                    | * |
| Stationary 2nd Exp |                    | * |
| Stationary 2nd Exp | Stationary 3rd Exp | * |
| Stationary 2nd Exp |                    | * |
| Stationary 2nd Exp | Stationary 3rd Exp | * |
| Stationary 2nd Exp | Stationary 3rd Exp | * |
| Stationary 2nd Exp |                    | * |
| Stationary 2nd Exp | Stationary 3rd Exp | * |
| Stationary 2nd Exp | Stationary 3rd Exp | * |
| Stationary 2nd Exp |                    | * |
| Stationary 2nd Exp |                    | * |
| Stationary 2nd Exp | Stationary 3rd Exp | * |
| Stationary 2nd Exp |                    | * |
| Stationary 2nd Exp |                    | * |
| Stationary 2nd Exp | Stationary 3rd Exp | * |
| Stationary 2nd Exp | Stationary 3rd Exp | * |
| Stationary 2nd Exp |                    | * |
| Stationary 2nd Exp | Stationary 3rd Exp | * |
| Stationary 2nd Exp | Stationary 3rd Exp | * |
| Stationary 2nd Exp |                    | * |
| Stationary 2nd Exp | Stationary 3rd Exp | * |
| Stationary 2nd Exp | Stationary 3rd Exp | * |
| Stationary 2nd Exp |                    | * |
| Stationary 2nd Exp |                    | * |
| Stationary 2nd Exp | Stationary 3rd Exp | * |
| Stationary 2nd Exp | Stationary 3rd Exp | * |
| Stationary 2nd Exp |                    | * |
| Stationary 2nd Exp | Stationary 3rd Exp | * |
| Stationary 2nd Exp |                    | * |
| Stationary 2nd Exp |                    | * |
| Stationary 2nd Exp |                    | * |



|                    |                    |   |
|--------------------|--------------------|---|
| Stationary 2nd Exp |                    | * |
| Stationary 2nd Exp |                    | * |
| Stationary 2nd Exp |                    | * |
| Stationary 2nd Exp | Stationary 3rd Exp | * |
| Stationary 2nd Exp | Stationary 3rd Exp | * |
| Stationary 2nd Exp |                    | * |
| Stationary 2nd Exp | Stationary 3rd Exp | * |
| Stationary 2nd Exp |                    | * |
| Stationary 2nd Exp |                    | * |
| Stationary 2nd Exp | Stationary 3rd Exp | * |
|                    |                    | * |
|                    | Stationary 3rd Exp | * |
| Stationary 2nd Exp | Stationary 3rd Exp | * |
| Stationary 2nd Exp | Stationary 3rd Exp | * |
| Stationary 2nd Exp |                    | * |
| Stationary 2nd Exp | Stationary 3rd Exp | * |
| Stationary 2nd Exp | Stationary 3rd Exp | * |
| Stationary 2nd Exp |                    | * |
| Stationary 2nd Exp | Stationary 3rd Exp | * |
| Stationary 2nd Exp |                    | * |
| Stationary 2nd Exp | Stationary 3rd Exp | * |
| Stationary 2nd Exp | Stationary 3rd Exp | * |
| Stationary 2nd Exp |                    | * |
| Stationary 2nd Exp | Stationary 3rd Exp | * |
| Stationary 2nd Exp | Stationary 3rd Exp | * |
| Stationary 2nd Exp |                    | * |
| Stationary 2nd Exp |                    | * |
| Stationary 2nd Exp | Stationary 3rd Exp | * |
| Stationary 2nd Exp | Stationary 3rd Exp | * |
| Stationary 2nd Exp |                    | * |
| Stationary 2nd Exp |                    | * |
| Stationary 2nd Exp | Stationary 3rd Exp | * |
| Stationary 2nd Exp | Stationary 3rd Exp | * |
| Stationary 2nd Exp |                    | * |
| Stationary 2nd Exp | Stationary 3rd Exp | * |
| Stationary 2nd Exp | Stationary 3rd Exp | * |
| Stationary 2nd Exp |                    | * |
| Stationary 2nd Exp |                    | * |



|                    |                    |   |
|--------------------|--------------------|---|
| Stationary 2nd Exp |                    | * |
| Stationary 2nd Exp | Stationary 3rd Exp | * |
| Stationary 2nd Exp | Stationary 3rd Exp | * |
| Stationary 2nd Exp |                    | * |
| Stationary 2nd Exp |                    | * |
| Stationary 2nd Exp | Stationary 3rd Exp | * |
|                    | Stationary 3rd Exp | * |
|                    | Stationary 3rd Exp | * |
| Stationary 2nd Exp |                    | * |
|                    | Stationary 3rd Exp | * |
|                    | Stationary 3rd Exp | * |
| Stationary 2nd Exp | Stationary 3rd Exp | * |
| Stationary 2nd Exp | Stationary 3rd Exp | * |
| Stationary 2nd Exp | Stationary 3rd Exp | * |
|                    | Stationary 3rd Exp | * |
|                    | Stationary 3rd Exp | * |
| Stationary 2nd Exp | Stationary 3rd Exp | * |
|                    | Stationary 3rd Exp | * |
| Stationary 2nd Exp |                    | * |
|                    | Stationary 3rd Exp | * |
| Stationary 2nd Exp | Stationary 3rd Exp | * |
|                    | Stationary 3rd Exp | * |
|                    |                    | * |
|                    |                    | * |
|                    |                    | * |
|                    |                    | * |
|                    |                    | * |
|                    |                    | * |
|                    |                    | * |
|                    |                    | * |
|                    |                    | * |
| Stationary 2nd Exp |                    | * |
| Stationary 2nd Exp |                    | * |
| Stationary 2nd Exp | Stationary 3rd Exp | * |
| Stationary 2nd Exp |                    | * |
| Stationary 2nd Exp |                    | * |
| Stationary 2nd Exp | Stationary 3rd Exp | * |





|                    |                    |   |
|--------------------|--------------------|---|
|                    |                    | * |
|                    |                    | * |
|                    |                    | * |
|                    |                    | * |
|                    |                    | * |
|                    |                    | * |
| Stationary 2nd Exp | Stationary 3rd Exp | * |
|                    | Stationary 3rd Exp | * |
| Stationary 2nd Exp | Stationary 3rd Exp | * |
|                    |                    | * |
|                    | Stationary 3rd Exp | * |
|                    |                    | * |
|                    | Stationary 3rd Exp | * |
|                    |                    | * |
|                    |                    | * |
|                    |                    | * |
| Stationary 2nd Exp | Stationary 3rd Exp | * |
|                    |                    | * |
|                    |                    | * |
|                    | Stationary 3rd Exp | * |
| Stationary 2nd Exp |                    | * |
|                    |                    | * |
| Stationary 2nd Exp | Stationary 3rd Exp | * |
| Stationary 2nd Exp |                    | * |
| Stationary 2nd Exp | Stationary 3rd Exp | * |
| Stationary 2nd Exp |                    | * |
| Stationary 2nd Exp | Stationary 3rd Exp | * |
|                    |                    | * |
|                    |                    | * |
|                    |                    | * |
|                    |                    | * |
|                    |                    | * |
| Stationary 2nd Exp |                    | * |
|                    |                    | * |
|                    |                    | * |
| Stationary 2nd Exp |                    | * |
|                    |                    | * |
| Stationary 2nd Exp |                    | * |
|                    |                    | * |
| Stationary 2nd Exp |                    | * |
|                    |                    | * |
|                    |                    | * |
|                    |                    | * |



Stationary 2nd Exp

Stationary 3rd Exp

Stationary 3rd Exp

Stationary 2nd Exp

Stationary 2nd Exp

Stationary 2nd Exp

Stationary 2nd Exp

Stationary 3rd Exp

Stationary 2nd Exp

Stationary 3rd Exp
