# Supplementary material
Source: PubMed Central journal article supplement (PMC5108054)
Supplement: NIHMS436991-supplement-S2.pdf [file NIHMS436991-supplement-S2.pdf]

| Accession | Protein Name | # |
|-----------|--------------|---|
| P0AG67    | S1           |   |
| P0A7V0    | S2           |   |
| P0A7V3    | S3           |   |
| P0A7V8    | S4           |   |
| P0A7W1    | S5           |   |
| P02358    | S6           |   |
| P02359    | S7           |   |
| P0A7W7    | S8           |   |
| P0A7X3    | S9           |   |
| P0A7R5    | S10          |   |
| P0A7R9    | S11          |   |
| P0A7S3    | S12          |   |
| P0A7S9    | S13          |   |
| P0AG59    | S14          |   |
| P0ADZ4    | S15          |   |
| P0A7T3    | S16          |   |
| P0AG63    | S17          |   |
| P0A7T7    | S18          |   |
| P0A7U3    | S19          |   |
| P0A7U7    | S20          |   |
| P68679    | S21          |   |
| P60422    | L2           | X |
| P60438    | L3           | X |
| P60723    | L4           | X |
| P62399    | L5           |   |
| P0AG55    | L6           |   |
| P0A7K2    | L7/L12       | X |
| P0ADY3    | L14          | X |
| P02413    | L15          |   |
| P0ADY7    | L16          |   |
| P61175    | L22          | X |
| P06992    | RsmA         |   |
| P36929    | RsmB         |   |
| P39406    | RsmC         |   |
| P0ADX9    | RcmD         | X |
| P0AGL7    | RcmE         |   |
| P60390    | RcmH         |   |
| P75876    | RcmI         |   |
| P0AA39    | RluC         | X |
| P55135    | RumA         | X |
| P0AGJ5    | yfiF         |   |

|        |                                             |   |
|--------|---------------------------------------------|---|
| P76550 | yffS                                        |   |
| P0A8A8 | RimP                                        |   |
| P0A7X6 | RimM                                        | X |
| P43329 | HrpA                                        |   |
| P69222 | IF-1                                        |   |
| P0A705 | IF-2                                        |   |
| P0A707 | IF-3                                        |   |
| P0A6M8 | Elongation factor G                         |   |
| P21499 | RNase R                                     |   |
| P21338 | RNase I                                     |   |
| P30850 | Exoribonuclease 2                           | X |
| P0A9J0 | RNase G                                     |   |
| P0A6X3 | Protein hfq                                 | X |
| P05055 | PNP transferase                             | X |
| P10408 | SecA                                        | X |
| P0A6Z3 | HtpG                                        | X |
| P08622 | DnaJ                                        |   |
| P0A850 | Trigger factor                              |   |
| P63284 | ClpB                                        |   |
| P31658 | HchA                                        | X |
| P0A7Z4 | RpoA                                        |   |
| P0A8V2 | RpoB                                        |   |
| P0A8T7 | RpoC                                        |   |
| P0A8W0 | NanR                                        | X |
| P0ACN4 | AllR                                        |   |
| P03030 | LysR                                        | X |
| P37671 | YiaJ                                        |   |
| P0ACP5 | GntR                                        | X |
| P0AG30 | Rho                                         | X |
| P39356 | yjhU                                        | X |
| P30864 | YafC                                        |   |
| P77300 | YagI                                        | X |
| P33224 | Protein AidB                                |   |
| P45577 | ProP effector                               | X |
| P0A6P7 | Probable GTP-binding protein engB           | X |
| P0A7B1 | Polyphosphate kinase                        |   |
| P0ABF1 | Poly(A) polymerase                          |   |
| P63883 | N-acetylmuramoyl-L-alanine amidase AmiC     | X |
| P0AF20 | N-acetylglucosamine repressor               | X |
| P00490 | Maltodextrin phosphorylase                  |   |
| P0A9G6 | Isocitrate lyase O                          | X |
| P0ACQ4 | Hydrogen peroxide-inducible genes activator | X |
| P0A9S5 | Glycerol dehydrogenase                      |   |

|        |                                                          |   |
|--------|----------------------------------------------------------|---|
| P09373 | Formate acetyltransferase 1                              |   |
| P0A6B7 | Cysteine desulfurase                                     | X |
| P0A9P6 | Cold-shock DEAD box protein A                            |   |
| P39177 | Universal stress protein G                               | X |
| P23830 | CDP-diacylglycerol--serine O-phosphatidyltransferase     |   |
| P0ACJ8 | Catabolite gene activator                                | X |
| P09546 | Bifunctional protein putA                                | X |
| P68066 | Autonomous glycy radical cofactor                        |   |
| P0A9M0 | ATP-dependent protease La                                |   |
| P0A6H5 | ATP-dependent protease ATPase subunit HslU               | X |
| P0ABH9 | ATP-dependent Clp protease ATP-binding subunit clpA      | X |
| P21507 | ATP-dependent RNA helicase srmB                          | X |
| P25888 | ATP-dependent RNA helicase rhIE                          | X |
| P15038 | Helicase IV                                              |   |
| P0A7G6 | Protein recA                                             |   |
| P0ACF0 | DNA-binding protein HU-alpha                             | X |
| P0AFI2 | DNA topoisomerase 4 subunit A                            | X |
| P0A988 | DNA polymerase III subunit beta                          |   |
| P0AED9 | DNA-cytosine methyltransferase                           | X |
| P0AEE8 | DNA adenine methylase                                    | X |
| P36683 | Aconitate hydratase 2                                    | X |
| P15977 | 4-alpha-glucanotransferase                               | X |
| P0A6Q6 | (3R)-hydroxymyristoyl-[acyl-carrier-protein] dehydratase | X |
| P21645 | UDP-3-O-[3-hydroxymyristoyl] glucosamine N-acyltransf    | X |
| P68191 | Stationary-phase-induced ribosome-associated protein C   | X |
| P0A6P7 | Probable GTP-binding protein engB                        | X |
| P61889 | Malate dehydrogenase                                     | X |
| P27127 | Lipopolysaccharide 1,6-galactosyltransferase             | X |
| P08200 | Isocitrate dehydrogenase [NADP]                          | X |
| P0A6Y1 | Integration host factor subunit beta                     |   |
| P0A6X7 | Integration host factor subunit alpha                    | X |
| P0A998 | Ferritin-1                                               | X |
| P0ABD3 | Bacterioferritin                                         | X |
| P13035 | Aerobic glycerol-3-phosphate dehydrogenase               | X |
| P16528 | Acetate operon repressor                                 | X |
| P0A991 | Fructose-bisphosphate aldolase                           |   |
| P0ADK6 | Protein yibA                                             | X |
| P0AB28 | Uncharacterized protein yceD                             |   |

of replicate ids

| 3/3 | Unique Peptides | Matched Spectra |
|-----|-----------------|-----------------|
| X   | 68              | 4548            |
| X   | 32              | 2312            |
| X   | 21              | 1580            |
| X   | 24              | 1016            |
| X   | 20              | 1179            |
| X   | 12              | 577             |
| X   | 26              | 1504            |
| X   | 20              | 836             |
| X   | 13              | 471             |
| X   | 13              | 602             |
| X   | 8               | 408             |
| X   | 8               | 303             |
| X   | 19              | 748             |
| X   | 7               | 146             |
| X   | 10              | 213             |
| X   | 11              | 720             |
| X   | 10              | 274             |
| X   | 10              | 520             |
| X   | 10              | 339             |
| X   | 8               | 225             |
| X   | 7               | 231             |
|     | 12              | 111             |
|     | 3               | 24              |
|     | 5               | 55              |
| X   | 10              | 68              |
| X   | 10              | 52              |
|     | 5               | 27              |
|     | 2               | 12              |
| X   | 5               | 37              |
| X   | 4               | 71              |
|     | 6               | 17              |
| X   | 10              | 116             |
| X   | 18              | 141             |
| X   | 21              | 171             |
|     | 4               | 19              |
| X   | 9               | 65              |
| X   | 14              | 102             |
| X   | 15              | 85              |
|     | 6               | 20              |
|     | 5               | 12              |
| X   | 14              | 174             |

|   |    |     |
|---|----|-----|
| X | 16 | 143 |
| X | 5  | 58  |
|   | 9  | 37  |
| X | 43 | 312 |
| X | 4  | 27  |
| X | 44 | 475 |
| X | 14 | 568 |
| X | 22 | 111 |
| X | 52 | 625 |
| X | 11 | 86  |
|   | 11 | 29  |
| X | 13 | 43  |
|   | 6  | 35  |
|   | 15 | 58  |
|   | 22 | 64  |
|   | 4  | 11  |
| X | 6  | 22  |
| X | 16 | 99  |
| X | 21 | 78  |
|   | 4  | 11  |
|   |    |     |
| X | 13 | 37  |
| X | 37 | 142 |
| X | 47 | 290 |
|   | 4  | 11  |
| X | 8  | 61  |
|   | 5  | 11  |
| X | 9  | 24  |
|   | 10 | 35  |
|   | 6  | 20  |
|   | 3  | 6   |
| X | 8  | 35  |
|   | 6  | 24  |
|   |    |     |
| X | 11 | 55  |
|   | 11 | 125 |
|   | 5  | 20  |
| X | 26 | 105 |
| X | 16 | 72  |
|   | 8  | 25  |
|   | 8  | 21  |
| X | 37 | 213 |
|   | 17 | 60  |
|   | 4  | 11  |
| X | 14 | 159 |

|   |    |     |
|---|----|-----|
| X | 19 | 74  |
|   | 5  | 8   |
| X | 32 | 416 |
|   | 7  | 16  |
| X | 18 | 95  |
|   | 4  | 11  |
|   | 7  | 12  |
| X | 5  | 31  |
| X | 39 | 200 |
|   | 6  | 12  |
|   | 18 | 63  |
|   | 10 | 24  |
|   | 14 | 59  |
| X | 9  | 27  |
| X | 8  | 22  |
|   | 5  | 67  |
|   | 9  | 18  |
| X | 10 | 89  |
|   | 6  | 24  |
|   | 3  | 9   |
|   | 4  | 9   |
|   | 18 | 62  |
|   | 4  | 39  |
|   | 4  | 9   |
|   | 4  | 55  |
|   | 5  | 20  |
|   | 11 | 40  |
|   | 6  | 14  |
|   | 3  | 6   |
| X | 3  | 24  |
|   | 6  | 34  |
|   | 2  | 9   |
|   | 3  | 14  |
|   | 16 | 57  |
|   | 4  | 8   |
| X | 18 | 99  |
|   | 5  | 8   |
| X | 7  | 50  |

**% Sequence Coverage**

98

100

82.8

72.3

95.2

85.9

100

100

72.3

97

61.2

49.2

100

43.5

61.7

78

65.1

84

70.6

60.9

34.7

43.3

22.9

32.8

58.1

49.7

64.5

30.1

43.1

33.8

44.5

58.6

59.7

77.5

27.7

66.2

52.4

47

21.9

15.5

46.4

56.5  
28.6  
58.2  
41.4  
94.4  
59.8  
77.2  
49.4  
71.2  
66  
21.1  
37  
64.7  
29.8  
35.8  
8.9  
23.7  
47.9  
38.5  
13.4

52.3  
36.9  
41.5  
23.9  
35  
27.6  
50.4  
43.8  
17.9  
12.2  
28.3  
30.9

29.2  
55.2  
33.8  
50.3  
45.8  
26.9  
27.3  
60.6  
55.5  
20  
53.9



35.1  
14.1  
68  
78.2  
62.1  
20.5  
7.3  
40.9  
58.9  
20.8  
32.2  
33.6  
50.6  
20.2  
30  
74.4  
18.4  
33.3  
17.2  
11.8  
6.9  
46.4  
31.1  
18.7  
57.8  
33.8  
53.5  
25.6  
12.9  
34  
47.5  
19.4  
27.8  
48.3  
19.7  
72.3  
  
19.3  
53.2
