# Supplementary material
Source: PubMed Central journal article supplement (PMC5108054)
Supplement: NIHMS436991-supplement-S3_mid-log.pdf [file NIHMS436991-supplement-S3_mid-log.pdf]

| Protein Name             | 1stmlpribofree Peptides | 1stmlpribofree PepHits |
|--------------------------|-------------------------|------------------------|
| <b>30S small Subunit</b> |                         |                        |
| sp P0AG67 RS1_ECOLI      | 23                      | 110                    |
| sp P0A7V8 RS4_ECOLI      | 5                       | 24                     |
| sp P0A7W1 RS5_ECOLI      | 2                       | 13                     |
| sp P02358 RS6_ECOLI      | 4                       | 23                     |
| sp P02359 RS7_ECOLI      | 6                       | 29                     |
| sp P0A7W7 RS8_ECOLI      | 3                       | 21                     |
| sp P0A7X3 RS9_ECOLI      | x                       | x                      |
| sp P0A7R5 RS10_ECOLI     | 5                       | 17                     |
| sp P0A7R9 RS11_ECOLI     | 2                       | 4                      |
| sp P0A7S3 RS12_ECOLI     | 5                       | 18                     |
| sp P0A7S9 RS13_ECOLI     | 3                       | 11                     |
| sp P0ADZ4 RS15_ECOLI     | 5                       | 25                     |
| sp P0A7T7 RS18_ECOLI     | 3                       | 17                     |
| sp P0A7U7 RS20_ECOLI     | 3                       | 8                      |

### Ribosomal Maintenance/Translational/Folding

|                       |    |     |
|-----------------------|----|-----|
| sp P0AEI4 RIMO_ECOLI  | 6  | 18  |
| sp P0A6F5 CH60_ECOLI  | 2  | 2   |
| sp P0CE47 EFTU1_ECOLI | 21 | 183 |
| sp P0A6M8 EFG_ECOLI   | 25 | 82  |
| sp P0A6N8 EFPL_ECOLI  | 2  | 6   |
| sp P0A6P1 EFTS_ECOLI  | 7  | 15  |
| sp P0CE48 EFTU2_ECOLI | 21 | 183 |
| sp P0CE47 EFTU1_ECOLI | 21 | 183 |
| sp P21499 RNR_ECOLI   | 2  | 2   |
| sp P75838 YCAO_ECOLI  | 19 | 144 |
| sp P0A6X3 HFQ_ECOLI   | 5  | 12  |
| sp P0AEK2 FABG_ECOLI  | 5  | 22  |
| sp P0A7L0 RL1_ECOLI   | 5  | 14  |
| sp P63284 CLPB_ECOLI  | 6  | 11  |
| sp P0A6Y8 DNAK_ECOLI  | 50 | 366 |
| sp P0A850 TIG_ECOLI   | 11 | 29  |

### Non-Ribosomal/Transriptional

|                      |    |    |
|----------------------|----|----|
| sp P06612 TOP1_ECOLI | 3  | 6  |
| sp P0A7Z4 RPOA_ECOLI | 4  | 9  |
| sp P0A8V2 RPOB_ECOLI | 9  | 31 |
| sp P0A8T7 RPOC_ECOLI | 11 | 26 |
| sp P0A6W5 GREA_ECOLI | 4  | 12 |
| sp P0AFF6 NUSA_ECOLI | 3  | 5  |

### Non-Ribosomal/Non- Translational

|                       |   |   |
|-----------------------|---|---|
| sp P36683 ACON2_ECOLI | 5 | 8 |
| sp P0A7D4 PURA_ECOLI  | 4 | 9 |

|                        |    |     |
|------------------------|----|-----|
| sp P67910 HLDD_ECOLI   | 26 | 289 |
| sp P0AE08 AHPC_ECOLI   | 3  | 4   |
| sp P68066 GRCA_ECOLI   | 6  | 12  |
| sp P24182 ACCC_ECOLI   | 4  | 6   |
| sp P0A9A6 FTSZ_ECOLI   | 2  | 3   |
| sp P0A6B7 ISCS_ECOLI   | 2  | 2   |
| sp P0AES4 GYRA_ECOLI   | 6  | 10  |
| sp P0A988 DPO3B_ECOLI  | 35 | 938 |
| sp P0A9L3 FKBB_ECOLI   | 4  | 10  |
| sp P0A9K9 SLYD_ECOLI   | 2  | 25  |
| sp P09373 PFLB_ECOLI   | 10 | 17  |
| sp P0A991 ALF1_ECOLI   | 3  | 5   |
| sp P0A6T1 G6PI_ECOLI   | 3  | 7   |
| sp P23893 GSA_ECOLI    | 7  | 20  |
| sp P0A9C5 GLNA_ECOLI   | 8  | 19  |
| sp P0A9S5 GLDA_ECOLI   | 7  | 21  |
| sp P00961 SYGB_ECOLI   | 7  | 16  |
| sp P32132 TYPA_ECOLI   | 2  | 5   |
| sp P0A6X7 IHFA_ECOLI   | 2  | 7   |
| sp P63284-2 CLPB_ECOLI | 6  | 11  |
| sp P0A8N5 SYK2_ECOLI   | 2  | 4   |
| sp P61889 MDH_ECOLI    | 3  | 5   |
| sp P31802 NARP_ECOLI   | 2  | 4   |
| sp P38489 NFNB_ECOLI   | 2  | 4   |
| sp P22259 PCKA_ECOLI   | 4  | 10  |
| sp P08839 PT1_ECOLI    | 5  | 8   |
| sp P0ADV7 MLAC_ECOLI   | 4  | 7   |
| sp P08191 FIMH_ECOLI   | 2  | 5   |
| sp P21599 KPYK2_ECOLI  | 2  | 4   |
| sp P0A853 TNAA_ECOLI   | 2  | 4   |
| sp P37689 GPMI_ECOLI   | 5  | 13  |
| sp P12995 BIOA_ECOLI   | x  | x   |
| sp P0ACF0 DBHA_ECOLI   | x  | x   |
| sp P0ACF4 DBHB_ECOLI   | x  | x   |
| sp P0A744 MSRA_ECOLI   | x  | x   |
| sp P04128 FIMA1_ECOLI  | x  | x   |

## Uncharacterized Proteins

|                      |   |    |
|----------------------|---|----|
| sp P0A8W5 YQGE_ECOLI | x | x  |
| sp P76116 YNCE_ECOLI | 5 | 17 |
| sp P0AF93 YJGF_ECOLI | 5 | 35 |
| sp P33355 YEHS_ECOLI | x | X  |

**2ndmlpribofree Peptides****2ndmlpribofree PepHits****3rdmlpribofree Peptides**

|    |      |    |
|----|------|----|
| 13 | 25   | 15 |
| x  | x    | 14 |
| x  | x    | 11 |
| 3  | 9    | 8  |
| 10 | 45   | 14 |
| 4  | 9    | 6  |
| 5  | 22   | 6  |
| x  | x    | 4  |
| x  | x    | 7  |
| 6  | 46   | 4  |
| 5  | 16   | 8  |
| 3  | 7    | 7  |
| 3  | 11   | 4  |
| x  | x    | 3  |
| 7  | 16   | x  |
| 17 | 58   | x  |
| 32 | 1116 | 18 |
| 42 | 341  | 19 |
| 3  | 10   | x  |
| 12 | 29   | 4  |
| 32 | 1116 | 18 |
| 32 | 1116 | 18 |
| 4  | 5    | 21 |
| x  | x    | 16 |
| 2  | 10   | 4  |
| 5  | 15   | x  |
| 3  | 5    | x  |
| 4  | 8    | x  |
| x  | x    | 43 |
| 3  | 7    | 5  |
| x  | x    | 3  |
| 19 | 88   | 11 |
| 47 | 131  | 22 |
| 13 | 21   | 13 |
| x  | x    | 2  |
| x  | x    | 2  |
| 9  | 18   | x  |
| 22 | 109  | 4  |

|    |     |    |
|----|-----|----|
| 20 | 92  | 26 |
| 6  | 21  | 12 |
| 5  | 13  | x  |
| 4  | 8   | x  |
| 12 | 32  | x  |
| 4  | 10  | x  |
| 24 | 76  | x  |
| x  | x   | 21 |
| 2  | 5   | x  |
| 3  | 14  | 3  |
| 6  | 11  | x  |
| 15 | 40  | 4  |
| x  | x   | 4  |
| 4  | 4   | x  |
| 2  | 3   | 6  |
| 20 | 172 | 16 |
| 36 | 102 | x  |
| 17 | 55  | x  |
| 4  | 10  | 2  |
| 3  | 6   | x  |
| 2  | 4   | x  |
| 12 | 43  | x  |
| 7  | 23  | x  |
| x  | x   | 2  |
| x  | x   | 5  |
| 5  | 10  | x  |
| 3  | 8   | x  |
| 3  | 14  | x  |
| 2  | 2   | x  |
| 2  | 2   | x  |
| 6  | 14  | x  |
| 2  | 2   | 5  |
| 5  | 16  | 5  |
| 4  | 13  | 4  |
| 4  | 14  | 2  |
| 4  | 22  | 5  |
|    |     |    |
| 2  | 7   | 3  |
| x  | x   | 10 |
| x  | x   | 5  |
| 3  | 7   | 6  |

**3rdmlpribofree Pephits****Description**

|     |                                                                        |
|-----|------------------------------------------------------------------------|
| 41  | 30S ribosomal protein S1 OS=Escherichia coli (strain K12) GN=rpsA P    |
| 88  | 30S ribosomal protein S4 OS=Escherichia coli (strain K12) GN=rpsD P    |
| 97  | 30S ribosomal protein S5 OS=Escherichia coli (strain K12) GN=rpsE P    |
| 48  | 30S ribosomal protein S6 OS=Escherichia coli (strain K12) GN=rpsF P    |
| 73  | 30S ribosomal protein S7 OS=Escherichia coli (strain K12) GN=rpsG P    |
| 52  | 30S ribosomal protein S8 OS=Escherichia coli (strain K12) GN=rpsH P    |
| 33  | 30S ribosomal protein S9 OS=Escherichia coli (strain K12) GN=rpsI P    |
| 14  | 30S ribosomal protein S10 OS=Escherichia coli (strain K12) GN=rpsJ I   |
| 25  | 30S ribosomal protein S11 OS=Escherichia coli (strain K12) GN=rpsK     |
| 7   | 30S ribosomal protein S12 OS=Escherichia coli (strain K12) GN=rpsL I   |
| 33  | 30S ribosomal protein S13 OS=Escherichia coli (strain K12) GN=rpsM     |
| 58  | 30S ribosomal protein S15 OS=Escherichia coli (strain K12) GN=rpsO     |
| 35  | 30S ribosomal protein S18 OS=Escherichia coli (strain K12) GN=rpsR     |
| 14  | 30S ribosomal protein S20 OS=Escherichia coli (strain K12) GN=rpsT     |
| x   | Ribosomal protein S12 methylthiotransferase rimO OS=Escherichia c      |
| x   | 60 kDa chaperonin OS=Escherichia coli (strain K12) GN=groL PE=1 SV     |
| 71  | Elongation factor Tu 1 OS=Escherichia coli (strain K12) GN=tufA PE=1   |
| 59  | Elongation factor G OS=Escherichia coli (strain K12) GN=fusA PE=1 S'   |
| x   | Elongation factor P-like protein OS=Escherichia coli (strain K12) GN=  |
| 8   | Elongation factor Ts OS=Escherichia coli (strain K12) GN=tsf PE=1 SV   |
| 71  | Elongation factor Tu 1 OS=Escherichia coli (strain K12) GN=tufA PE=1   |
| 71  | Elongation factor Tu 2 OS=Escherichia coli (strain K12) GN=tufB PE=1   |
| 60  | Ribonuclease R OS=Escherichia coli (strain K12) GN=rnr PE=1 SV=2 [I    |
| 87  | UPF0142 protein ycaO OS=Escherichia coli (strain K12) GN=ycaO PE=      |
| 12  | Protein hfq OS=Escherichia coli (strain K12) GN=hfq PE=1 SV=2 [MAS     |
| x   | 3-oxoacyl-[acyl-carrier-protein] reductase OS=Escherichia coli (strair |
| x   | 50S ribosomal protein L1 OS=Escherichia coli (strain K12) GN=rplA P    |
| x   | Chaperone protein clpB OS=Escherichia coli (strain K12) GN=clpB PE=    |
| 236 | Chaperone protein dnaK OS=Escherichia coli (strain K12) GN=dnaK P      |
| 7   | Trigger factor OS=Escherichia coli (strain K12) GN=tig PE=1 SV=1 [M/   |
| 6   | DNA topoisomerase 1 OS=Escherichia coli (strain K12) GN=topA PE=       |
| 29  | DNA-directed RNA polymerase subunit alpha OS=Escherichia coli (st      |
| 43  | DNA-directed RNA polymerase subunit beta OS=Escherichia coli (str      |
| 1   | DNA-directed RNA polymerase subunit beta' OS=Escherichia coli (str     |
| 3   | Transcription elongation factor greA OS=Escherichia coli (strain K12)  |
| 4   | Transcription elongation protein nusA OS=Escherichia coli (strain K1   |
| x   | Aconitate hydratase 2 OS=Escherichia coli (strain K12) GN=acnB PE=     |
| 6   | Adenylosuccinate synthetase OS=Escherichia coli (strain K12) GN=pu     |

200 ADP-L-glycero-D-manno-heptose-6-epimerase OS=Escherichia coli (s  
 45 Alkyl hydroperoxide reductase subunit C OS=Escherichia coli (strain  
 x Autonomous glycyl radical cofactor OS=Escherichia coli (strain K12) (s  
 x Biotin carboxylase OS=Escherichia coli (strain K12) GN=accC PE=1 SV  
 x Cell division protein ftsZ OS=Escherichia coli (strain K12) GN=ftsZ PE=1  
 x Cysteine desulfurase OS=Escherichia coli (strain K12) GN=iscS PE=1 SV  
 x DNA gyrase subunit A OS=Escherichia coli (strain K12) GN=gyrA PE=1 SV  
 313 DNA polymerase III subunit beta OS=Escherichia coli (strain K12) GN  
 x FKBP-type 22 kDa peptidyl-prolyl cis-trans isomerase OS=Escherichia coli (strain K12) GN=FKBP22  
 10 FKBP-type peptidyl-prolyl cis-trans isomerase slyD OS=Escherichia coli (strain K12) GN=slyD  
 x Formate acetyltransferase 1 OS=Escherichia coli (strain K12) GN=pflI  
 12 Fructose-bisphosphate aldolase class 1 OS=Escherichia coli (strain K12) GN=fbpA  
 7 Glucose-6-phosphate isomerase OS=Escherichia coli (strain K12) GN=glpI  
 x Glutamate-1-semialdehyde 2,1-aminomutase OS=Escherichia coli (strain K12) GN=glutA  
 14 Glutamine synthetase OS=Escherichia coli (strain K12) GN=glnA PE=1 SV  
 118 Glycerol dehydrogenase OS=Escherichia coli (strain K12) GN=gldA PE=1 SV  
 x Glycyl-tRNA synthetase beta subunit OS=Escherichia coli (strain K12) GN=glyS  
 x GTP-binding protein typA/BipA OS=Escherichia coli (strain K12) GN=typA  
 8 Integration host factor subunit alpha OS=Escherichia coli (strain K12) GN=ihfA  
 x Isoform ClpB-3 of Chaperone protein clpB OS=Escherichia coli (strain K12) GN=clpB  
 x Lysyl-tRNA synthetase, heat inducible OS=Escherichia coli (strain K12) GN=lysS  
 x Malate dehydrogenase OS=Escherichia coli (strain K12) GN=mdh PE=1 SV  
 x Nitrate/nitrite response regulator protein narP OS=Escherichia coli (strain K12) GN=narP  
 6 Oxygen-insensitive NAD(P)H nitroreductase OS=Escherichia coli (strain K12) GN=oxyR  
 15 Phosphoenolpyruvate carboxykinase [ATP] OS=Escherichia coli (strain K12) GN=pepC  
 x Phosphoenolpyruvate-protein phosphotransferase OS=Escherichia coli (strain K12) GN=ptsA  
 x Probable phospholipid-binding protein mlaC OS=Escherichia coli (strain K12) GN=mlaC  
 x Protein fimH OS=Escherichia coli (strain K12) GN=fimH PE=1 SV=2 [N  
 x Pyruvate kinase II OS=Escherichia coli (strain K12) GN=pykA PE=1 SV  
 x Tryptophanase OS=Escherichia coli (strain K12) GN=tnaA PE=1 SV=1  
 x 2,3-bisphosphoglycerate-independent phosphoglycerate mutase OS  
 14 Adenosylmethionine-8-amino-7-oxononanoate aminotransferase OS=Escherichia coli (strain K12) GN=metK  
 22 DNA-binding protein HU-alpha OS=Escherichia coli (strain K12) GN=hud  
 11 DNA-binding protein HU-beta OS=Escherichia coli (strain K12) GN=huf  
 3 Peptide methionine sulfoxide reductase msrA OS=Escherichia coli (strain K12) GN=msrA  
 72 Type-1 fimbrial protein, A chain OS=Escherichia coli (strain K12) GN=fimA

10 UPF0301 protein yqgE OS=Escherichia coli (strain K12) GN=yqgE PE=1 SV=1  
 27 Uncharacterized protein YncE OS=Escherichia coli (strain K12) GN=yncE  
 16 UPF0076 protein yjgF OS=Escherichia coli (strain K12) GN=yjgF PE=1 SV=1  
 20 Uncharacterized protein yehS OS=Escherichia coli (strain K12) GN=yehS

PE=1 SV=1 [MASS=61158]  
PE=1 SV=2 [MASS=23469]  
E=1 SV=2 [MASS=17603]  
E=1 SV=1 [MASS=15703]  
PE=1 SV=3 [MASS=20019]  
PE=1 SV=2 [MASS=14127]  
E=1 SV=2 [MASS=14856]  
PE=1 SV=1 [MASS=11736]  
PE=1 SV=2 [MASS=13845]  
PE=1 SV=2 [MASS=13737]  
1 PE=1 SV=2 [MASS=13099]  
PE=1 SV=2 [MASS=10269]  
PE=1 SV=2 [MASS=8986]  
PE=1 SV=2 [MASS=9684]

coli (strain K12) GN=rpoA PE=1 SV=1 [MASS=49582]  
/2 [MASS=57329]  
1 SV=1 [MASS=43284]  
V=2 [MASS=77581]  
yep PE=1 SV=1 [MASS=21533]  
=2 [MASS=30423]  
1 SV=1 [MASS=43284]  
1 SV=1 [MASS=43314]  
MASS=92109]  
=3 SV=2 [MASS=65652]  
SS=11166]  
r K12) GN=fabG PE=1 SV=1 [MASS=25560]  
E=1 SV=2 [MASS=24730]  
=1 SV=1 [MASS=95585]  
PE=1 SV=2 [MASS=69115]  
ASS=48193]

1 SV=2 [MASS=97350]  
rain K12) GN=rpoA PE=1 SV=1 [MASS=36512]  
ain K12) GN=rpoB PE=1 SV=1 [MASS=150632]  
rain K12) GN=rpoC PE=1 SV=1 [MASS=155160]  
) GN=greA PE=1 SV=1 [MASS=17641]  
2) GN=nusA PE=1 SV=1 [MASS=54871]

1 SV=3 [MASS=93498]  
rA PE=1 SV=2 [MASS=47345]

strain K12) GN=hldD PE=1 SV=1 [MASS=34893]  
K12) GN=ahpC PE=1 SV=2 [MASS=20761]  
GN=grcA PE=1 SV=1 [MASS=14284]  
/=2 [MASS=49321]  
=1 SV=1 [MASS=40324]  
sV=1 [MASS=45089]  
l SV=1 [MASS=96964]  
=dnaN PE=1 SV=1 [MASS=40587]  
coli (strain K12) GN=fkIB PE=1 SV=2 [MASS=22216]  
oli (strain K12) GN=slyD PE=1 SV=1 [MASS=20853]  
B PE=1 SV=2 [MASS=85357]  
12) GN=fbaB PE=1 SV=2 [MASS=38109]  
=pgi PE=1 SV=1 [MASS=61530]  
train K12) GN=hemL PE=1 SV=2 [MASS=45366]  
1 SV=2 [MASS=51904]  
=1 SV=1 [MASS=38712]  
) GN=glyS PE=1 SV=4 [MASS=76813]  
typA PE=1 SV=2 [MASS=67355]  
) GN=ihfA PE=1 SV=1 [MASS=11354]  
r K12) GN=clpB [MASS=79870]  
2) GN=lysU PE=1 SV=2 [MASS=57827]  
=1 SV=1 [MASS=32337]  
strain K12) GN=narP PE=3 SV=1 [MASS=23575]  
ain K12) GN=nfnB PE=1 SV=1 [MASS=23905]  
in K12) GN=pckA PE=1 SV=2 [MASS=59643]  
:oli (strain K12) GN=ptsI PE=1 SV=1 [MASS=63562]  
:ain K12) GN=mlaC PE=1 SV=1 [MASS=23963]  
MASS=31473]  
'=3 [MASS=51357]  
[MASS=52773]  
i=Escherichia coli (strain K12) GN=gpmI PE=1 SV=1 [MASS=56194]  
S=Escherichia coli (strain K12) GN=bioA PE=1 SV=2 [MASS=47336]  
hupA PE=1 SV=1 [MASS=9535]  
upB PE=1 SV=1 [MASS=9226]  
train K12) GN=msrA PE=1 SV=2 [MASS=23315]  
=fimA PE=1 SV=2 [MASS=18111]

:1 SV=1 [MASS=20686]  
ncE PE=1 SV=1 [MASS=38613]  
SV=2 [MASS=13612]  
ehS PE=4 SV=1 [MASS=17973]
