# Supplementary material
Source: PubMed Central journal article supplement (PMC5108054)
Supplement: NIHMS436991-supplement-S3_seq_coverage.pdf [file NIHMS436991-supplement-S3_seq_coverage.pdf]

| Acession | Protein Name                     | 2/3 |
|----------|----------------------------------|-----|
| P0AG67   | S1                               |     |
| P0A7V8   | S4                               | X   |
| P0A7W1   | S5                               | X   |
| P02358   | S6                               |     |
| P02359   | S7                               |     |
| P0A7W7   | S8                               |     |
| P0A7X3   | S9                               | X   |
| P0A7R5   | S10                              | X   |
| P0A7R9   | S11                              | X   |
| P0A7S3   | S12                              |     |
| P0A7S9   | S13                              |     |
| P0ADZ4   | S15                              |     |
| P0A7T7   | S18                              |     |
| P0A7U7   | S20                              | X   |
| P0AEI4   | MiaB like Methyltransferase RimO | X   |
| P75838   | uncharacterized ycaO             | X   |
| P76116   | uncharacterized yncE             | X   |
| P33355   | uncharacterized yehS             | X   |
| P0AF93   | uncharacterized yjgf             | X   |
| P0CE47   | Elongation factor Tu             |     |
| P0A6P1   | Elongation factor Ts             |     |
| P0A6M8   | Elongation factor G              |     |
| P0A6N4   | Elongation factor P              |     |
| P21499   | RNaseR                           |     |
| P0A6X3   | Hfq-1                            |     |
| P0A805   | Ribosome Recycling Factor        |     |
| P0A8A8   | Ribosome maturation factor rimP  |     |

| 3/3 | Unique Peptides | Matched Spectra |
|-----|-----------------|-----------------|
| X   | 26              | 176             |
|     | 16              | 142             |
|     | 12              | 114             |
| X   | 8               | 80              |
| X   | 15              | 147             |
| X   | 8               | 82              |
|     | 6               | 58              |
|     | 5               | 31              |
|     | 7               | 29              |
| X   | 6               | 71              |
| X   | 9               | 60              |
| X   | 8               | 90              |
| X   | 5               | 63              |
|     | 4               | 22              |
|     | 9               | 34              |
|     | 21              | 237             |
|     | 10              | 44              |
|     | 7               | 22              |
|     | 7               | 52              |
| X   | 34              | 1370            |
| X   | 16              | 52              |
| X   | 43              | 482             |
| X   | 5               | 17              |
| X   | 22              | 67              |
| X   | 7               | 25              |
| X   | 6               | 21              |
| X   | 6               | 40              |

**% Sequence Coverage**

50.8  
58.7  
82.6  
62.9  
69.8  
67.7  
42.3  
43.7  
79.8  
24.2  
61  
68.5  
50.6  
55.2

24.3  
44.3  
38.8  
50  
77.4  
84.5  
55.8  
73  
26  
41.2  
54  
47  
33
