# Supplementary material
Source: PubMed Central journal article supplement (PMC5108054)
Supplement: NIHMS436991-supplement-S4_seq_coverage.pdf [file NIHMS436991-supplement-S4_seq_coverage.pdf]

| <b>Accession</b> | <b>Protein Name</b>                                  |
|------------------|------------------------------------------------------|
| P0AG67           | S1                                                   |
| P0A7V3           | S3                                                   |
| P0A7V8           | S4                                                   |
| P0A7W1           | S5                                                   |
| P02358           | S6                                                   |
| P02359           | S7                                                   |
| P0A7W7           | S8                                                   |
| P0A7X3           | S9                                                   |
| P0A7R5           | S10                                                  |
| P0A7R9           | S11                                                  |
| P0A7S3           | S12                                                  |
| P0A7S9           | S13                                                  |
| P0ADZ4           | S15                                                  |
| P0AG63           | S17                                                  |
| P0A7T7           | S18                                                  |
|                  |                                                      |
| P21499           | RNaseR                                               |
| P0A6X3           | Hfq-1                                                |
| P75838           | uncharacterized YcaO                                 |
| P76116           | uncharacterized YncE                                 |
| P0A6M8           | Elongation Factor G                                  |
| P0A805           | Ribosome Recycling Factor                            |
| P0A8A8           | Ribosome maturation factor rimP                      |
| P05055           | Polyribonucleotide nucleotidyltransferase            |
|                  |                                                      |
| P0A6X7           | Integration host factor subunit alpha                |
| P63284           | Chaperone protein clpB                               |
| P0A991           | Fructose-bisphosphate aldolase class 1               |
| P22259           | Phosphoenolpyruvate carboxykinase                    |
| P0A9C5           | Glutamine synthetase                                 |
| P08191           | Protein fimH                                         |
| P0A988           | DNA polymerase III subunit beta                      |
| P45577           | ProP effector                                        |
| P36929           | Ribosomal RNA small subunit methyltransferase B      |
| P0A850           | Trigger factor                                       |
| P0AG86           | Protein-export protein SecB                          |
| P0A7D4           | Adenylosuccinate synthetase                          |
| P67910           | ADP-L-glycero-D-manno-heptose-6-epimerase            |
| P0A9L3           | FKBP-type 22 kDa peptidyl-prolyl cis-trans isomerase |
| P61949           | Flavodoxin-1                                         |
| P0A9S5           | Glycerol dehydrogenase                               |
| P00490           | Maltodextrin phosphorylase                           |
| P09372           | Protein grpE                                         |
| P43329           | ATP-dependent RNA helicase hrpA                      |

P0ACF0  
P0ACF4

DNA-binding protein HU-alpha  
DNA-binding protein HU-beta

| 2/3 | 3/3 | Unique Peptides | Matched Spectra |
|-----|-----|-----------------|-----------------|
|     | X   | 42              | 417             |
| X   |     | 11              | 143             |
| X   |     | 15              | 190             |
|     | X   | 12              | 323             |
| X   |     | 6               | 24              |
|     | X   | 14              | 240             |
|     | X   | 10              | 170             |
|     | X   | 8               | 133             |
|     | X   | 9               | 114             |
| X   |     | 5               | 56              |
|     | X   | 8               | 96              |
|     | X   | 9               | 92              |
| X   |     | 8               | 36              |
| X   |     | 3               | 49              |
|     | X   | 5               | 99              |
|     | X   | 31              | 145             |
|     | X   | 5               | 20              |
|     | X   | 13              | 103             |
| X   |     | 4               | 11              |
|     | X   | 25              | 131             |
| X   |     | 5               | 12              |
|     | X   | 6               | 80              |
| X   |     | 10              | 19              |
|     |     |                 |                 |
| X   |     | 6               | 31              |
| X   |     | 18              | 35              |
| X   |     | 19              | 130             |
| X   |     | 9               | 29              |
| X   |     | 11              | 40              |
| X   |     | 3               | 13              |
|     | X   | 19              | 169             |
|     | X   | 7               | 48              |
| X   |     | 12              | 34              |
|     | X   | 11              | 54              |
| X   |     | 3               | 14              |
| X   |     | 10              | 21              |
|     | X   | 25              | 298             |
| X   |     | 3               | 10              |
| X   |     | 4               | 9               |
|     | X   | 11              | 119             |
| X   |     | 13              | 41              |
| X   |     | 5               | 17              |
| X   |     | 5               | 8               |

X  
X

5  
3

70  
22

**% Sequence Coverage**

93.7

56.2

68.9

41.7

61.5

60.8

79

48.4

53.4

50

55.6

67.8

60

41.6

50.6

50.5

44

24.5

18.4

53.8

35.7

35.3

19.3

47.5

29.3

68.2

26.5

35.8

14.3

47.8

40.1

40.1

28

31.6

25.5

68.7

19.4

32.9

37.6

19.6

35

4.2

74.4  
50
