# Supplementary material
Source: PubMed Central journal article supplement (PMC5108054)
Supplement: NIHMS436991-supplement-S4_stat_ribo_free.pdf [file NIHMS436991-supplement-S4_stat_ribo_free.pdf]

| Protein Name             | 1stexpstatribofree Peptides | 1stexpstatribofree PepHits |
|--------------------------|-----------------------------|----------------------------|
| <b>30S small Subunit</b> |                             |                            |
| sp P0AG67 RS1_ECOLI      | 14                          | 22                         |
| sp P0A7V3 RS3_ECOLI      | x                           | x                          |
| sp P0A7V8 RS4_ECOLI      | x                           | x                          |
| sp P0A7W1 RS5_ECOLI      | 3                           | 4                          |
| sp P02358 RS6_ECOLI      | x                           | x                          |
| sp P02359 RS7_ECOLI      | 8                           | 27                         |
| sp P0A7W7 RS8_ECOLI      | 2                           | 4                          |
| sp P0A7X3 RS9_ECOLI      | 3                           | 10                         |
| sp P0A7R5 RS10_ECOLI     | 4                           | 14                         |
| sp P0A7R9 RS11_ECOLI     | x                           | x                          |
| sp P0A7S3 RS12_ECOLI     | 7                           | 52                         |
| sp P0A7S9 RS13_ECOLI     | 3                           | 6                          |
| sp P0ADZ4 RS15_ECOLI     | x                           | x                          |
| sp P0AG63 RS17_ECOLI     | x                           | x                          |
| sp P0A7T7 RS18_ECOLI     | 4                           | 10                         |

### Maintenance/Translational/Folding

|                      |    |    |
|----------------------|----|----|
| sp P36929 RSMB_ECOLI | x  | x  |
| sp P0A8A8 RIMP_ECOLI | 6  | 47 |
| sp P0A805 RRF_ECOLI  | 5  | 7  |
| sp P21499 RNR_ECOLI  | 6  | 8  |
| sp P0A6X3 HFQ_ECOLI  | 2  | 5  |
| sp P05055 PNP_ECOLI  | 7  | 7  |
| sp P0A6M8 EFG_ECOLI  | 24 | 68 |
| sp P63284 CLPB_ECOLI | 18 | 30 |
| sp P0A850 TIG_ECOLI  | 7  | 2  |
| sp P0AG86 SECB_ECOLI | 2  | 8  |

### Ribosomal/Non- Translational

|                       |    |     |
|-----------------------|----|-----|
| sp P0A991 ALF1_ECOLI  | 14 | 39  |
| sp P0A6X7 IHFA_ECOLI  | x  | x   |
| sp P22259 PCKA_ECOLI  | 9  | 24  |
| sp P0A9C5 GLNA_ECOLI  | 9  | 20  |
| sp P08191 FIMH_ECOLI  | 2  | 8   |
| sp P0A988 DPO3B_ECOLI | 12 | 36  |
| sp P45577 PROQ_ECOLI  | 3  | 7   |
| sp P0A7D4 PURA_ECOLI  | 10 | 17  |
| sp P67910 HLDD_ECOLI  | 25 | 203 |
| sp P0A9L3 FKBB_ECOLI  | 2  | 3   |
| sp P61949 FLAV_ECOLI  | 3  | 4   |
| sp P0A9S5 GLDA_ECOLI  | 9  | 27  |
| sp P0A862 TPX_ECOLI   | 6  | 22  |
| sp P00490 PHSM_ECOLI  | 9  | 13  |
| sp P09372 GRPE_ECOLI  | 5  | 9   |
| sp P43329 HRPA_ECOLI  | x  | x   |

|                      |   |   |
|----------------------|---|---|
| sp P0ACF0 DBHA_ECOLI | x | x |
| sp P0ACF4 DBHB_ECOLI | x | x |

### **Uncharacterized Proteins**

|                      |    |    |
|----------------------|----|----|
| sp P75838 YCAO_ECOLI | 11 | 56 |
| sp P76116 YNCE_ECOLI | x  | x  |

**2ndexpstatribofree Peptides****2ndexpstatribofree PepHits****3rdexpstatribofree Peptides**

|    |     |    |
|----|-----|----|
| 47 | 360 | 17 |
| 11 | 136 | 4  |
| 14 | 98  | 12 |
| 12 | 256 | 7  |
| 6  | 20  | 2  |
| 13 | 141 | 12 |
| 10 | 127 | 5  |
| 8  | 114 | 4  |
| 9  | 91  | 3  |
| 5  | 37  | 3  |
| 8  | 38  | 2  |
| 9  | 73  | 5  |
| 8  | 27  | 5  |
| 3  | 41  | 2  |
| 5  | 65  | 4  |
| 5  | 7   | 12 |
| 4  | 23  | 2  |
| x  | x   | 3  |
| 26 | 80  | 24 |
| 3  | 5   | 5  |
| 6  | 11  | x  |
| 14 | 33  | 9  |
| 3  | 5   | x  |
| 9  | 2   | 5  |
| x  | x   | 3  |
| 19 | 91  | x  |
| 5  | 13  | 5  |
| x  | x   | 3  |
| x  | x   | 8  |
| 2  | 3   | x  |
| 3  | 8   | 18 |
| 5  | 21  | 4  |
| x  | x   | 2  |
| 19 | 56  | 14 |
| x  | x   | 3  |
| x  | x   | 2  |
| 10 | 64  | 9  |
| x  | x   | 5  |
| 11 | 28  | x  |
| x  | x   | 2  |
| 3  | 5   | 2  |

5  
2

31  
9

5  
3

6  
2

17  
3

10  
4

**3rdexpstatribofree Peptides****Description**

|     |                                                                                                         |
|-----|---------------------------------------------------------------------------------------------------------|
| 30  | 30S ribosomal protein S1 OS=Escherichia coli (strain K12) GN=rpsA PE=                                   |
| 7   | 30S ribosomal protein S3 OS=Escherichia coli (strain K12) GN=rpsC PE=                                   |
| 92  | 30S ribosomal protein S4 OS=Escherichia coli (strain K12) GN=rpsD PE=                                   |
| 63  | 30S ribosomal protein S5 OS=Escherichia coli (strain K12) GN=rpsE PE=                                   |
| 3   | 30S ribosomal protein S6 OS=Escherichia coli (strain K12) GN=rpsF PE=                                   |
| 72  | 30S ribosomal protein S7 OS=Escherichia coli (strain K12) GN=rpsG PE=                                   |
| 39  | 30S ribosomal protein S8 OS=Escherichia coli (strain K12) GN=rpsH PE=                                   |
| 9   | 30S ribosomal protein S9 OS=Escherichia coli (strain K12) GN=rpsI PE=1                                  |
| 9   | 30S ribosomal protein S10 OS=Escherichia coli (strain K12) GN=rpsJ PE=                                  |
| 19  | 30S ribosomal protein S11 OS=Escherichia coli (strain K12) GN=rpsK PE=                                  |
| 6   | 30S ribosomal protein S12 OS=Escherichia coli (strain K12) GN=rpsL PE=                                  |
| 13  | 30S ribosomal protein S13 OS=Escherichia coli (strain K12) GN=rpsM PE=                                  |
| 13  | 30S ribosomal protein S15 OS=Escherichia coli (strain K12) GN=rpsO PE=                                  |
| 8   | 30S ribosomal protein S17 OS=Escherichia coli (strain K12) GN=rpsQ PE=                                  |
| 24  | 30S ribosomal protein S18 OS=Escherichia coli (strain K12) GN=rpsR PE=                                  |
| 27  | Ribosomal RNA small subunit methyltransferase B OS=Escherichia coli (strain K12) GN=rsmB PE=1           |
| 10  | Ribosome maturation factor rimP OS=Escherichia coli (strain K12) GN=rmpP PE=1                           |
| 5   | Ribosome-recycling factor OS=Escherichia coli (strain K12) GN=rrf PE=1                                  |
| 57  | Ribonuclease R OS=Escherichia coli (strain K12) GN=rnr PE=1 SV=2 [MASS=                                 |
| 10  | Protein hfq OS=Escherichia coli (strain K12) GN=hfq PE=1 SV=2 [MASS=                                    |
| x   | Polyribonucleotide nucleotidyltransferase OS=Escherichia coli (strain K12) GN=polA PE=1 SV=2            |
| 30  | Elongation factor G OS=Escherichia coli (strain K12) GN=efuA PE=1 SV=2                                  |
| x   | Chaperone protein clpB OS=Escherichia coli (strain K12) GN=clpB PE=1                                    |
| 2   | Trigger factor OS=Escherichia coli (strain K12) GN=tig PE=1 SV=1 [MASS=                                 |
| 3   | Protein-export protein SecB OS=Escherichia coli (strain K12) GN=secB PE=1                               |
| x   | Fructose-bisphosphate aldolase class 1 OS=Escherichia coli (strain K12) GN=fbaA PE=1 SV=2               |
| 16  | Integration host factor subunit alpha OS=Escherichia coli (strain K12) GN=ihfA PE=1 SV=2                |
| 5   | Phosphoenolpyruvate carboxykinase [ATP] OS=Escherichia coli (strain K12) GN=pcpA PE=1 SV=2              |
| 18  | Glutamine synthetase OS=Escherichia coli (strain K12) GN=glnA PE=1 SV=2                                 |
| x   | Protein fimH OS=Escherichia coli (strain K12) GN=fimH PE=1 SV=2 [MASS=                                  |
| 125 | DNA polymerase III subunit beta OS=Escherichia coli (strain K12) GN=dnaE PE=1 SV=2                      |
| 20  | ProP effector OS=Escherichia coli (strain K12) GN=proQ PE=1 SV=2 [MASS=                                 |
| 4   | Adenylosuccinate synthetase OS=Escherichia coli (strain K12) GN=purA PE=1 SV=2                          |
| 39  | ADP-L-glycero-D-manno-heptose-6-epimerase OS=Escherichia coli (strain K12) GN=hepA PE=1 SV=2            |
| 7   | FKBP-type 22 kDa peptidyl-prolyl cis-trans isomerase OS=Escherichia coli (strain K12) GN=pp5i PE=1 SV=2 |
| 5   | Flavodoxin-1 OS=Escherichia coli (strain K12) GN=fldA PE=1 SV=2 [MASS=                                  |
| 28  | Glycerol dehydrogenase OS=Escherichia coli (strain K12) GN=glcA PE=1 SV=2                               |
| 10  | Thiol peroxidase OS=Escherichia coli (strain K12) GN=tpx PE=1 SV=2 [MASS=                               |
| x   | Maltodextrin phosphorylase OS=Escherichia coli (strain K12) GN=malP PE=1 SV=2                           |
| 5   | Protein grpE OS=Escherichia coli (strain K12) GN=grpE PE=1 SV=1 [MASS=                                  |
| 3   | ATP-dependent RNA helicase hrpA OS=Escherichia coli (strain K12) GN=hrpA PE=1 SV=2                      |

34 DNA-binding protein HU-alpha OS=Escherichia coli (strain K12) GN=hup  
13 DNA-binding protein HU-beta OS=Escherichia coli (strain K12) GN=hupl

30 UPF0142 protein ycaO OS=Escherichia coli (strain K12) GN=ycaO PE=3  
8 Uncharacterized protein YncE OS=Escherichia coli (strain K12) GN=yncE

:1 SV=1 [MASS=61158]  
1 SV=2 [MASS=25983]  
:1 SV=2 [MASS=23469]  
1 SV=2 [MASS=17603]  
1 SV=1 [MASS=15703]  
:1 SV=3 [MASS=20019]  
:1 SV=2 [MASS=14127]  
L SV=2 [MASS=14856]  
=1 SV=1 [MASS=11736]  
=1 SV=2 [MASS=13845]  
=1 SV=2 [MASS=13737]  
E=1 SV=2 [MASS=13099]  
:=1 SV=2 [MASS=10269]  
:=1 SV=2 [MASS=9704]  
=1 SV=2 [MASS=8986]

(strain K12) GN=rsmB PE=1 SV=2 [MASS=48348]  
rimP PE=1 SV=2 [MASS=16651]  
. SV=1 [MASS=20639]  
\SS=92109]  
:11166]  
12) GN=png PE=1 SV=3 [MASS=77101]  
2 [MASS=77581]  
SV=1 [MASS=95585]  
s=48193]  
PE=1 SV=1 [MASS=17277]

| GN=fbaB PE=1 SV=2 [MASS=38109]  
|N=ihfA PE=1 SV=1 [MASS=11354]  
K12) GN=pckA PE=1 SV=2 [MASS=59643]  
V=2 [MASS=51904]  
SS=31473]  
naN PE=1 SV=1 [MASS=40587]  
\SS=25893]  
, PE=1 SV=2 [MASS=47345]  
ain K12) GN=hldD PE=1 SV=1 [MASS=34893]  
oli (strain K12) GN=fkIB PE=1 SV=2 [MASS=22216]  
|S=19737]  
L SV=1 [MASS=38712]  
IASS=17835]  
PE=1 SV=7 [MASS=90522]  
|S=21798]  
=hrpA PE=3 SV=3 [MASS=149028]

⌋A PE=1 SV=1 [MASS=9535]  
B PE=1 SV=1 [MASS=9226]

SV=2 [MASS=65652]  
⌋ PE=1 SV=1 [MASS=38613]
