# Supplementary material
Source: PubMed Central journal article supplement (PMC5108054)
Supplement: NIHMS436991-supplement-S5_Bait.pdf [file NIHMS436991-supplement-S5_Bait.pdf]

| Accession | Entry Name | % of IntAct | % of IntAct | % of IntAct | * ID interactor A |
|-----------|------------|-------------|-------------|-------------|-------------------|
| P00350    | 6PGD_ECOLI |             |             |             | * P00350          |
| P00350    | 6PGD_ECOLI |             |             |             | * P00350          |
| P00350    | 6PGD_ECOLI | 3           | 3           | 100.00%     | * P00350          |
| P52697    | 6PGL_ECOLI |             |             |             | * P52697          |
| P52697    | 6PGL_ECOLI |             |             |             | * P52697          |
| P52697    | 6PGL_ECOLI |             |             |             | * P52697          |
| P52697    | 6PGL_ECOLI |             |             |             | * P52697          |
| P52697    | 6PGL_ECOLI | 4           | 6           | 66.67%      | * P52697          |
| P00509    | AAT_ECOLI  | 1           | 1           | 100.00%     | * P00509          |
| P0ABD5    | ACCA_ECOLI |             |             |             | * P0ABD5          |
| P0ABD5    | ACCA_ECOLI |             |             |             | * P0ABD5          |
| P0ABD5    | ACCA_ECOLI |             |             |             | * P0ABD5          |
| P0ABD5    | ACCA_ECOLI |             |             |             | * P0ABD5          |
| P0ABD5    | ACCA_ECOLI |             |             |             | * P0ABD5          |
| P0ABD5    | ACCA_ECOLI |             |             |             | * P0ABD5          |
| P0ABD5    | ACCA_ECOLI |             |             |             | * P0ABD5          |
| P0ABD5    | ACCA_ECOLI |             |             |             | * P0ABD5          |
| P0ABD5    | ACCA_ECOLI |             |             |             | * P0ABD5          |
| P0ABD5    | ACCA_ECOLI |             |             |             | * P0ABD5          |
| P0ABD5    | ACCA_ECOLI |             |             |             | * P0ABD5          |
| P0ABD5    | ACCA_ECOLI | 9           | 13          | 69.23%      | * P0ABD5          |
| P24182    | ACCC_ECOLI |             |             |             | * P24182          |
| P24182    | ACCC_ECOLI |             |             |             | * P24182          |
| P24182    | ACCC_ECOLI |             |             |             | * P24182          |
| P24182    | ACCC_ECOLI |             |             |             | * P24182          |
| P24182    | ACCC_ECOLI |             |             |             | * P24182          |
| P24182    | ACCC_ECOLI |             |             |             | * P24182          |
| P24182    | ACCC_ECOLI |             |             |             | * P24182          |
| P24182    | ACCC_ECOLI |             |             |             | * P24182          |
| P24182    | ACCC_ECOLI |             |             |             | * P24182          |
| P24182    | ACCC_ECOLI |             |             |             | * P24182          |
| P24182    | ACCC_ECOLI |             |             |             | * P24182          |
| P24182    | ACCC_ECOLI |             |             |             | * P24182          |
| P24182    | ACCC_ECOLI |             |             |             | * P24182          |
| P24182    | ACCC_ECOLI | 7           | 15          | 46.67%      | * P24182          |
| P0A9G6    | ACEA_ECOLI |             |             |             | * P0A9G6          |
| P0A9G6    | ACEA_ECOLI | 0           | 2           | 0.00%       | * P0A9G6          |



|        |            |    |    |         |          |
|--------|------------|----|----|---------|----------|
| P0A6A8 | ACP_ECOLI  |    |    |         | * P0A6A8 |
| P0A6A8 | ACP_ECOLI  |    |    |         | * P0A6A8 |
| P0A6A8 | ACP_ECOLI  |    |    |         | * P0A6A8 |
| P0A6A8 | ACP_ECOLI  |    |    |         | * P0A6A8 |
| P0A6A8 | ACP_ECOLI  |    |    |         | * P0A6A8 |
| P0A6A8 | ACP_ECOLI  |    |    |         | * P0A6A8 |
| P0A6A8 | ACP_ECOLI  |    |    |         | * P0A6A8 |
| P0A6A8 | ACP_ECOLI  |    |    |         | * P0A6A8 |
| P0A6A8 | ACP_ECOLI  |    |    |         | * P0A6A8 |
| P0A6A8 | ACP_ECOLI  |    |    |         | * P0A6A8 |
| P0A6A8 | ACP_ECOLI  |    |    |         | * P0A6A8 |
| P0A6A8 | ACP_ECOLI  |    |    |         | * P0A6A8 |
| P0A6A8 | ACP_ECOLI  |    |    |         | * P0A6A8 |
| P0A6A8 | ACP_ECOLI  |    |    |         | * P0A6A8 |
| P0A6A8 | ACP_ECOLI  |    |    |         | * P0A6A8 |
| P0A6A8 | ACP_ECOLI  |    |    |         | * P0A6A8 |
| P0A6A8 | ACP_ECOLI  |    |    |         | * P0A6A8 |
| P0A6A8 | ACP_ECOLI  |    |    |         | * P0A6A8 |
| P0A6A8 | ACP_ECOLI  |    |    |         | * P0A6A8 |
| P0A6A8 | ACP_ECOLI  |    |    |         | * P0A6A8 |
| P0A6A8 | ACP_ECOLI  |    |    |         | * P0A6A8 |
| P0A6A8 | ACP_ECOLI  |    |    |         | * P0A6A8 |
| P0A6A8 | ACP_ECOLI  |    |    |         | * P0A6A8 |
| P0A6A8 | ACP_ECOLI  |    |    |         | * P0A6A8 |
| P0A6A8 | ACP_ECOLI  |    |    |         | * P0A6A8 |
| P0A6A8 | ACP_ECOLI  |    |    |         | * P0A6A8 |
| P0A6A8 | ACP_ECOLI  |    |    |         | * P0A6A8 |
| P0A6A8 | ACP_ECOLI  |    |    |         | * P0A6A8 |
| P0A6A8 | ACP_ECOLI  |    |    |         | * P0A6A8 |
| P0A6A8 | ACP_ECOLI  |    |    |         | * P0A6A8 |
| P0A6A8 | ACP_ECOLI  |    |    |         | * P0A6A8 |
| P0A6A8 | ACP_ECOLI  |    |    |         | * P0A6A8 |
| P0A6A8 | ACP_ECOLI  |    |    |         | * P0A6A8 |
| P0A6A8 | ACP_ECOLI  |    |    |         | * P0A6A8 |
| P0A6A8 | ACP_ECOLI  |    |    |         | * P0A6A8 |
| P0A6A8 | ACP_ECOLI  |    |    |         | * P0A6A8 |
| P0A6A8 | ACP_ECOLI  |    |    |         | * P0A6A8 |
| P0A6A8 | ACP_ECOLI  |    |    |         | * P0A6A8 |
| P0A6A8 | ACP_ECOLI  |    |    |         | * P0A6A8 |
| P0A6A8 | ACP_ECOLI  |    |    |         | * P0A6A8 |
| P0A6A8 | ACP_ECOLI  | 38 | 57 | 66.67%  | * P0A6A8 |
| P24180 | ACRE_ECOLI |    |    |         | none     |
| P0ACS9 | ACRR_ECOLI | 1  | 1  | 100.00% | * P0ACS9 |
| P22333 | ADD_ECOLI  |    |    |         | * P22333 |
| P22333 | ADD_ECOLI  |    |    |         | * P22333 |
| P22333 | ADD_ECOLI  |    |    |         | * P22333 |
| P22333 | ADD_ECOLI  |    |    |         | * P22333 |
| P22333 | ADD_ECOLI  |    |    |         | * P22333 |
| P22333 | ADD_ECOLI  | 2  | 6  | 33.33%  | * P22333 |



|        |            |    |    |         |          |
|--------|------------|----|----|---------|----------|
| P33224 | AIDB_ECOLI |    |    |         | * P33224 |
| P33224 | AIDB_ECOLI |    |    |         | * P33224 |
| P33224 | AIDB_ECOLI |    |    |         | * P33224 |
| P33224 | AIDB_ECOLI |    |    |         | * P33224 |
| P33224 | AIDB_ECOLI |    |    |         | * P33224 |
| P33224 | AIDB_ECOLI |    |    |         | * P33224 |
| P33224 | AIDB_ECOLI |    |    |         | * P33224 |
| P33224 | AIDB_ECOLI | 25 | 26 | 96.15%  | * P33224 |
| P00561 | AK1H_ECOLI |    |    |         | * P00561 |
| P00561 | AK1H_ECOLI | 2  | 2  | 100.00% | * P00561 |
| P08660 | AK3_ECOLI  |    |    |         | none     |
| P0AB71 | ALF_ECOLI  |    |    |         | * P0AB71 |
| P0AB71 | ALF_ECOLI  |    |    |         | * P0AB71 |
| P0AB71 | ALF_ECOLI  |    |    |         | * P0AB71 |
| P0AB71 | ALF_ECOLI  |    |    |         | * P0AB71 |
| P0AB71 | ALF_ECOLI  |    |    |         | * P0AB71 |
| P0AB71 | ALF_ECOLI  | 4  | 6  | 66.67%  | * P0AB71 |
| P0A991 | ALF1_ECOLI |    |    |         | * P0A991 |
| P0A991 | ALF1_ECOLI |    |    |         | * P0A991 |
| P0A991 | ALF1_ECOLI |    |    |         | * P0A991 |
| P0A991 | ALF1_ECOLI | 2  | 4  | 50.00%  | * P0A991 |
| P0A955 | ALKH_ECOLI |    |    |         | * P0A955 |
| P0A955 | ALKH_ECOLI |    |    |         | * P0A955 |
| P0A955 | ALKH_ECOLI |    |    |         | * P0A955 |
| P0A955 | ALKH_ECOLI |    |    |         | * P0A955 |
| P0A955 | ALKH_ECOLI |    |    |         | * P0A955 |
| P0A955 | ALKH_ECOLI |    |    |         | * P0A955 |
| P0A955 | ALKH_ECOLI | 2  | 7  | 28.57%  | * P0A955 |
| P77425 | ALLC_ECOLI |    |    |         | * P77425 |
| P77425 | ALLC_ECOLI |    |    |         | * P77425 |
| P77425 | ALLC_ECOLI |    |    |         | * P77425 |
| P77425 | ALLC_ECOLI |    |    |         | * P77425 |
| P77425 | ALLC_ECOLI | 3  | 5  | 60.00%  | * P77425 |
| P0ACN4 | ALLR_ECOLI |    |    |         | * P0ACN4 |
| P0ACN4 | ALLR_ECOLI |    |    |         | * P0ACN4 |
| P0ACN4 | ALLR_ECOLI |    |    |         | * P0ACN4 |
| P0ACN4 | ALLR_ECOLI |    |    |         | * P0ACN4 |
| P0ACN4 | ALLR_ECOLI |    |    |         | * P0ACN4 |



|        |            |    |    |         |          |
|--------|------------|----|----|---------|----------|
| P0AE18 | AMPM_ECOLI |    |    |         | * P0AE18 |
| P0AE18 | AMPM_ECOLI |    |    |         | * P0AE18 |
| P0AE18 | AMPM_ECOLI |    |    |         | * P0AE18 |
| P0AE18 | AMPM_ECOLI |    |    |         | * P0AE18 |
| P0AE18 | AMPM_ECOLI |    |    |         | * P0AE18 |
| P0AE18 | AMPM_ECOLI |    |    |         | * P0AE18 |
| P0AE18 | AMPM_ECOLI |    |    |         | * P0AE18 |
| P0AE18 | AMPM_ECOLI |    |    |         | * P0AE18 |
| P0AE18 | AMPM_ECOLI |    |    |         | * P0AE18 |
| P0AE18 | AMPM_ECOLI |    |    |         | * P0AE18 |
| P0AE18 | AMPM_ECOLI | 15 | 22 | 68.18%  | * P0AE18 |
| P04825 | AMPN_ECOLI |    |    |         | * P04825 |
| P04825 | AMPN_ECOLI |    |    |         | * P04825 |
| P04825 | AMPN_ECOLI |    |    |         | * P04825 |
| P04825 | AMPN_ECOLI | 2  | 4  | 50.00%  | * P04825 |
| P62672 | APAG_ECOLI |    |    |         | none     |
| P69503 | APT_ECOLI  |    |    |         | * P69503 |
| P69503 | APT_ECOLI  |    |    |         | * P69503 |
| P69503 | APT_ECOLI  | 1  | 3  | 33.33%  | * P69503 |
| P0A9Q1 | ARCA_ECOLI | 1  | 1  | 100.00% | * P0A9Q1 |
| P0A6C8 | ARGB_ECOLI |    |    |         | none     |
| P77690 | ARNB_ECOLI |    |    |         | none     |
| P07639 | AROB_ECOLI |    |    |         | * P07639 |
| P07639 | AROB_ECOLI |    |    |         | * P07639 |
| P07639 | AROB_ECOLI | 1  | 3  | 33.33%  | * P07639 |
| P15770 | AROE_ECOLI |    |    |         | * P15770 |
| P15770 | AROE_ECOLI |    |    |         | * P15770 |
| P15770 | AROE_ECOLI | 2  | 3  | 66.67%  | * P15770 |
| P0A6D7 | AROK_ECOLI |    |    |         | none     |
| P0AE28 | AROM_ECOLI |    |    |         | * P0AE28 |
| P0AE28 | AROM_ECOLI |    |    |         | * P0AE28 |
| P0AE28 | AROM_ECOLI | 2  | 3  | 66.67%  | * P0AE28 |
| P76205 | ARPB_ECOLI |    |    |         | none     |

|        |             |    |    |         |          |
|--------|-------------|----|----|---------|----------|
| P00963 | ASNA_ECOLI  | 1  | 1  | 100.00% | * P00963 |
| P0ACI6 | ASNC_ECOLI  | 1  | 1  | 100.00% | * P0ACI6 |
| P00805 | ASPG2_ECOLI |    |    |         | * P00805 |
| P00805 | ASPG2_ECOLI | 1  | 2  | 50.00%  | * P00805 |
| P36560 | ASR_ECOLI   |    |    |         | none     |
| POABB0 | ATPA_ECOLI  |    |    |         | * POABB0 |
| POABB0 | ATPA_ECOLI  |    |    |         | * POABB0 |
| POABB0 | ATPA_ECOLI  |    |    |         | * POABB0 |
| POABB0 | ATPA_ECOLI  |    |    |         | * POABB0 |
| POABB0 | ATPA_ECOLI  |    |    |         | * POABB0 |
| POABB0 | ATPA_ECOLI  |    |    |         | * POABB0 |
| POABB0 | ATPA_ECOLI  |    |    |         | * POABB0 |
| POABB0 | ATPA_ECOLI  |    |    |         | * POABB0 |
| POABB0 | ATPA_ECOLI  |    |    |         | * POABB0 |
| POABB0 | ATPA_ECOLI  |    |    |         | * POABB0 |
| POABB0 | ATPA_ECOLI  |    |    |         | * POABB0 |
| POABB0 | ATPA_ECOLI  |    |    |         | * POABB0 |
| POABB0 | ATPA_ECOLI  |    |    |         | * POABB0 |
| POABB0 | ATPA_ECOLI  |    |    |         | * POABB0 |
| POABB0 | ATPA_ECOLI  |    |    |         | * POABB0 |
| POABB0 | ATPA_ECOLI  |    |    |         | * POABB0 |
| POABB0 | ATPA_ECOLI  |    |    |         | * POABB0 |
| POABB0 | ATPA_ECOLI  | 15 | 18 | 83.33%  | * POABB0 |
| POABB4 | ATPB_ECOLI  |    |    |         | * POABB4 |
| POABB4 | ATPB_ECOLI  |    |    |         | * POABB4 |
| POABB4 | ATPB_ECOLI  |    |    |         | * POABB4 |
| POABB4 | ATPB_ECOLI  |    |    |         | * POABB4 |
| POABB4 | ATPB_ECOLI  |    |    |         | * POABB4 |
| POABB4 | ATPB_ECOLI  |    |    |         | * POABB4 |
| POABB4 | ATPB_ECOLI  |    |    |         | * POABB4 |
| POABB4 | ATPB_ECOLI  |    |    |         | * POABB4 |
| POABB4 | ATPB_ECOLI  | 9  | 9  | 100.00% | * POABB4 |
| POABA0 | ATPF_ECOLI  |    |    |         | none     |
| POABA6 | ATPG_ECOLI  |    |    |         | * POABA6 |
| POABA6 | ATPG_ECOLI  |    |    |         | * POABA6 |
| POABA6 | ATPG_ECOLI  |    |    |         | * POABA6 |
| POABA6 | ATPG_ECOLI  |    |    |         | * POABA6 |
| POABA6 | ATPG_ECOLI  |    |    |         | * POABA6 |



|        |            |   |   |        |          |
|--------|------------|---|---|--------|----------|
| P0ABA6 | ATPG_ECOLI | 4 | 6 | 66.67% | * P0ABA6 |
| P68699 | ATPL_ECOLI |   |   |        | none     |
| P37617 | ATZN_ECOLI |   |   |        | * P37617 |
| P37617 | ATZN_ECOLI |   |   |        | * P37617 |
| P37617 | ATZN_ECOLI |   |   |        | * P37617 |
| P37617 | ATZN_ECOLI |   |   |        | * P37617 |
| P37617 | ATZN_ECOLI |   |   |        | * P37617 |
| P37617 | ATZN_ECOLI |   |   |        | * P37617 |
| P37617 | ATZN_ECOLI | 4 | 7 | 57.14% | * P37617 |
| P41407 | AZOR_ECOLI |   |   |        | none     |
| P30847 | BAES_ECOLI |   |   |        | none     |
| P30843 | BASR_ECOLI |   |   |        | * P30843 |
| P30843 | BASR_ECOLI |   |   |        | * P30843 |
| P30843 | BASR_ECOLI |   |   |        | * P30843 |
| P30843 | BASR_ECOLI | 3 | 4 | 75.00% | * P30843 |
| P0AE52 | BCP_ECOLI  |   |   |        | * P0AE52 |
| P0AE52 | BCP_ECOLI  |   |   |        | * P0AE52 |
| P0AE52 | BCP_ECOLI  |   |   |        | * P0AE52 |
| P0AE52 | BCP_ECOLI  |   |   |        | * P0AE52 |
| P0AE52 | BCP_ECOLI  |   |   |        | * P0AE52 |
| P0AE52 | BCP_ECOLI  |   |   |        | * P0AE52 |
| P0AE52 | BCP_ECOLI  | 4 | 7 | 57.14% | * P0AE52 |
| P37652 | BCSB_ECOLI |   |   |        | none     |
| P17445 | BETB_ECOLI |   |   |        | * P17445 |
| P17445 | BETB_ECOLI |   |   |        | * P17445 |
| P17445 | BETB_ECOLI |   |   |        | * P17445 |
| P17445 | BETB_ECOLI |   |   |        | * P17445 |
| P17445 | BETB_ECOLI |   |   |        | * P17445 |
| P17445 | BETB_ECOLI | 2 | 6 | 33.33% | * P17445 |
| P0ABD3 | BFR_ECOLI  |   |   |        | * P0ABD3 |
| P0ABD3 | BFR_ECOLI  | 0 | 2 | 0.00%  | * P0ABD3 |
| P06864 | BGA2_ECOLI |   |   |        | none     |
| Q46829 | BGLA_ECOLI |   |   |        | * Q46829 |
| Q46829 | BGLA_ECOLI | 1 | 2 | 50.00% | * Q46829 |







|        |            |    |    |        |   |        |
|--------|------------|----|----|--------|---|--------|
| P0A6F9 | CH10_ECOLI |    |    |        | * | P0A6F9 |
| P0A6F9 | CH10_ECOLI | 14 | 19 | 73.68% | * | P0A6F9 |
| P0A6F5 | CH60_ECOLI |    |    |        | * | P0A6F5 |
| P0A6F5 | CH60_ECOLI |    |    |        | * | P0A6F5 |
| P0A6F5 | CH60_ECOLI |    |    |        | * | P0A6F5 |
| P0A6F5 | CH60_ECOLI |    |    |        | * | P0A6F5 |
| P0A6F5 | CH60_ECOLI |    |    |        | * | P0A6F5 |
| P0A6F5 | CH60_ECOLI |    |    |        | * | P0A6F5 |
| P0A6F5 | CH60_ECOLI |    |    |        | * | P0A6F5 |
| P0A6F5 | CH60_ECOLI |    |    |        | * | P0A6F5 |
| P0A6F5 | CH60_ECOLI |    |    |        | * | P0A6F5 |
| P0A6F5 | CH60_ECOLI |    |    |        | * | P0A6F5 |
| P0A6F5 | CH60_ECOLI |    |    |        | * | P0A6F5 |
| P0A6F5 | CH60_ECOLI |    |    |        | * | P0A6F5 |
| P0A6F5 | CH60_ECOLI |    |    |        | * | P0A6F5 |
| P0A6F5 | CH60_ECOLI |    |    |        | * | P0A6F5 |
| P0A6F5 | CH60_ECOLI |    |    |        | * | P0A6F5 |
| P0A6F5 | CH60_ECOLI |    |    |        | * | P0A6F5 |
| P0A6F5 | CH60_ECOLI |    |    |        | * | P0A6F5 |
| P0A6F5 | CH60_ECOLI |    |    |        | * | P0A6F5 |
| P0A6F5 | CH60_ECOLI |    |    |        | * | P0A6F5 |
| P0A6F5 | CH60_ECOLI |    |    |        | * | P0A6F5 |
| P0A6F5 | CH60_ECOLI |    |    |        | * | P0A6F5 |
| P0A6F5 | CH60_ECOLI |    |    |        | * | P0A6F5 |
| P0A6F5 | CH60_ECOLI |    |    |        | * | P0A6F5 |
| P0A6F5 | CH60_ECOLI | 15 | 23 | 65.22% | * | P0A6F5 |
| P17411 | CHBF_ECOLI |    |    |        |   | none   |
| P0ABH7 | CISY_ECOLI |    |    |        | * | P0ABH7 |
| P0ABH7 | CISY_ECOLI |    |    |        | * | P0ABH7 |
| P0ABH7 | CISY_ECOLI |    |    |        | * | P0ABH7 |
| P0ABH7 | CISY_ECOLI | 3  | 4  | 75.00% | * | P0ABH7 |
| P77390 | CITC_ECOLI |    |    |        | * | P77390 |
| P77390 | CITC_ECOLI |    |    |        | * | P77390 |
| P77390 | CITC_ECOLI |    |    |        | * | P77390 |
| P77390 | CITC_ECOLI |    |    |        | * | P77390 |
| P77390 | CITC_ECOLI | 2  | 5  | 40.00% | * | P77390 |
| P0ABH9 | CLPA_ECOLI |    |    |        | * | P0ABH9 |
| P0ABH9 | CLPA_ECOLI |    |    |        | * | P0ABH9 |
| P0ABH9 | CLPA_ECOLI |    |    |        | * | P0ABH9 |
| P0ABH9 | CLPA_ECOLI |    |    |        | * | P0ABH9 |
| P0ABH9 | CLPA_ECOLI |    |    |        | * | P0ABH9 |



|        |            |    |    |        |          |
|--------|------------|----|----|--------|----------|
| P0ABH9 | CLPA_ECOLI |    |    |        | * P0ABH9 |
| P0ABH9 | CLPA_ECOLI |    |    |        | * P0ABH9 |
| P0ABH9 | CLPA_ECOLI |    |    |        | * P0ABH9 |
| P0ABH9 | CLPA_ECOLI |    |    |        | * P0ABH9 |
| P0ABH9 | CLPA_ECOLI |    |    |        | * P0ABH9 |
| P0ABH9 | CLPA_ECOLI | 35 | 56 | 62.50% | * P0ABH9 |
| P63284 | CLPB_ECOLI |    |    |        | * P63284 |
| P63284 | CLPB_ECOLI |    |    |        | * P63284 |
| P63284 | CLPB_ECOLI |    |    |        | * P63284 |
| P63284 | CLPB_ECOLI |    |    |        | * P63284 |
| P63284 | CLPB_ECOLI |    |    |        | * P63284 |
| P63284 | CLPB_ECOLI |    |    |        | * P63284 |
| P63284 | CLPB_ECOLI |    |    |        | * P63284 |
| P63284 | CLPB_ECOLI |    |    |        | * P63284 |
| P63284 | CLPB_ECOLI |    |    |        | * P63284 |
| P63284 | CLPB_ECOLI |    |    |        | * P63284 |
| P63284 | CLPB_ECOLI |    |    |        | * P63284 |
| P63284 | CLPB_ECOLI |    |    |        | * P63284 |
| P63284 | CLPB_ECOLI |    |    |        | * P63284 |
| P63284 | CLPB_ECOLI |    |    |        | * P63284 |
| P63284 | CLPB_ECOLI |    |    |        | * P63284 |
| P63284 | CLPB_ECOLI |    |    |        | * P63284 |
| P63284 | CLPB_ECOLI |    |    |        | * P63284 |
| P63284 | CLPB_ECOLI |    |    |        | * P63284 |
| P63284 | CLPB_ECOLI |    |    |        | * P63284 |
| P63284 | CLPB_ECOLI |    |    |        | * P63284 |
| P63284 | CLPB_ECOLI |    |    |        | * P63284 |
| P63284 | CLPB_ECOLI |    |    |        | * P63284 |
| P63284 | CLPB_ECOLI |    |    |        | * P63284 |
| P63284 | CLPB_ECOLI |    |    |        | * P63284 |
| P63284 | CLPB_ECOLI |    |    |        | * P63284 |
| P63284 | CLPB_ECOLI |    |    |        | * P63284 |
| P63284 | CLPB_ECOLI |    |    |        | * P63284 |
| P63284 | CLPB_ECOLI |    |    |        | * P63284 |
| P63284 | CLPB_ECOLI |    |    |        | * P63284 |
| P63284 | CLPB_ECOLI |    |    |        | * P63284 |
| P63284 | CLPB_ECOLI |    |    |        | * P63284 |
| P63284 | CLPB_ECOLI | 20 | 38 | 52.63% | * P63284 |











|        |            |   |   |         |          |
|--------|------------|---|---|---------|----------|
| P0ABK5 | CYSK_ECOLI | 5 | 8 | 62.50%  | * P0ABK5 |
| P16700 | CYSP_ECOLI | 1 | 1 | 100.00% | * P16700 |
| P22255 | CYSQ_ECOLI |   |   |         | none     |
| P0AEB2 | DACA_ECOLI |   |   |         | none     |
| P08506 | DACC_ECOLI |   |   |         | none     |
| P0A6J5 | DADA_ECOLI |   |   |         | none     |
| P0A6L2 | DAPA_ECOLI |   |   |         | * P0A6L2 |
| P0A6L2 | DAPA_ECOLI |   |   |         | * P0A6L2 |
| P04036 | DAPB_ECOLI |   |   |         | none     |
| P0A9D8 | DAPD_ECOLI | 0 | 1 | 0.00%   | * P0A9D8 |
| P0AED7 | DAPE_ECOLI | 1 | 1 | 100.00% | * P0AED7 |
| P0A6K1 | DAPF_ECOLI |   |   |         | none     |
| P0ACF0 | DBHA_ECOLI |   |   |         | * P0ACF0 |
| P0ACF0 | DBHA_ECOLI |   |   |         | * P0ACF0 |
| P0ACF0 | DBHA_ECOLI |   |   |         | * P0ACF0 |
| P0ACF0 | DBHA_ECOLI |   |   |         | * P0ACF0 |
| P0ACF0 | DBHA_ECOLI |   |   |         | * P0ACF0 |
| P0ACF0 | DBHA_ECOLI |   |   |         | * P0ACF0 |
| P0ACF0 | DBHA_ECOLI |   |   |         | * P0ACF0 |
| P0ACF0 | DBHA_ECOLI |   |   |         | * P0ACF0 |
| P0ACF0 | DBHA_ECOLI |   |   |         | * P0ACF0 |
| P0ACF0 | DBHA_ECOLI |   |   |         | * P0ACF0 |
| P0ACF0 | DBHA_ECOLI |   |   |         | * P0ACF0 |
| P0ACF0 | DBHA_ECOLI |   |   |         | * P0ACF0 |
| P0ACF0 | DBHA_ECOLI |   |   |         | * P0ACF0 |
| P0ACF0 | DBHA_ECOLI |   |   |         | * P0ACF0 |
| P0ACF0 | DBHA_ECOLI |   |   |         | * P0ACF0 |
| P0ACF0 | DBHA_ECOLI |   |   |         | * P0ACF0 |
| P0ACF0 | DBHA_ECOLI |   |   |         | * P0ACF0 |
| P0ACF4 | DBHB_ECOLI |   |   |         | * P0ACF4 |
| P0ACF4 | DBHB_ECOLI |   |   |         | * P0ACF4 |
| P0ACF4 | DBHB_ECOLI |   |   |         | * P0ACF4 |
| P0ACF4 | DBHB_ECOLI |   |   |         | * P0ACF4 |

|        |            |          |
|--------|------------|----------|
| POACF4 | DBHB_ECOLI | * POACF4 |
| P69908 | DCEA_ECOLI | * P69908 |
| P69908 | DCEA_ECOLI | * P69908 |
| P69908 | DCEA_ECOLI | * P69908 |

|        |            |   |   |         |          |
|--------|------------|---|---|---------|----------|
| P69908 | DCEA_ECOLI |   |   |         | * P69908 |
| P69908 | DCEA_ECOLI |   |   |         | * P69908 |
| P69908 | DCEA_ECOLI |   |   |         | * P69908 |
| P69908 | DCEA_ECOLI |   |   |         | * P69908 |
| P69908 | DCEA_ECOLI |   |   |         | * P69908 |
| P69908 | DCEA_ECOLI |   |   |         | * P69908 |
| P69908 | DCEA_ECOLI |   |   |         | * P69908 |
| P69908 | DCEA_ECOLI |   |   |         | * P69908 |
| P69908 | DCEA_ECOLI |   |   |         | * P69908 |
| P69908 | DCEA_ECOLI |   |   |         | * P69908 |
| P69908 | DCEA_ECOLI |   |   |         | * P69908 |
| P69908 | DCEA_ECOLI |   |   |         | * P69908 |
| P69910 | DCEB_ECOLI |   |   |         | * P69910 |
| P69910 | DCEB_ECOLI |   |   |         | * P69910 |
| P69910 | DCEB_ECOLI |   |   |         | * P69910 |
| P69910 | DCEB_ECOLI |   |   |         | * P69910 |
| P69910 | DCEB_ECOLI |   |   |         | * P69910 |
| POAED9 | DCM_ECOLI  |   |   |         | * POAED9 |
| POAED9 | DCM_ECOLI  |   |   |         | * POAED9 |
| POAED9 | DCM_ECOLI  |   |   |         | * POAED9 |
| POAED9 | DCM_ECOLI  |   |   |         | * POAED9 |
| POAED9 | DCM_ECOLI  |   |   |         | * POAED9 |
| POAED9 | DCM_ECOLI  |   |   |         | * POAED9 |
| POAED9 | DCM_ECOLI  |   |   |         | * POAED9 |
| POAED9 | DCM_ECOLI  |   |   |         | * POAED9 |
| POAED9 | DCM_ECOLI  |   |   |         | * POAED9 |
| POAED9 | DCM_ECOLI  |   |   |         | * POAED9 |
| POAED9 | DCM_ECOLI  |   |   |         | * POAED9 |
| POAED9 | DCM_ECOLI  |   |   |         | * POAED9 |
| POAED9 | DCM_ECOLI  |   |   |         | * POAED9 |
| POAED9 | DCM_ECOLI  |   |   |         | * POAED9 |
| POAED9 | DCM_ECOLI  |   |   |         | * POAED9 |
| POAED9 | DCM_ECOLI  |   |   |         | * POAED9 |
| POAED9 | DCM_ECOLI  |   |   |         | * POAED9 |
| P24171 | DCP_ECOLI  |   |   |         | * P24171 |
| P24171 | DCP_ECOLI  |   |   |         | * P24171 |
| P24171 | DCP_ECOLI  |   |   |         | * P24171 |
| POABN9 | DCUB_ECOLI |   |   |         | none     |
| POAEC8 | DCUS_ECOLI | 1 | 1 | 100.00% | * POAEC8 |







|        |            |   |   |         |   |        |
|--------|------------|---|---|---------|---|--------|
| P0A9P6 | DEAD_ECOLI |   |   |         | * | P0A9P6 |
| P0A9P6 | DEAD_ECOLI |   |   |         | * | P0A9P6 |
| P0A9P6 | DEAD_ECOLI |   |   |         | * | P0A9P6 |
| P0A9P6 | DEAD_ECOLI |   |   |         | * | P0A9P6 |
| P0A6K3 | DEF_ECOLI  |   |   |         | * | P0A6K3 |
| P0A6K3 | DEF_ECOLI  |   |   |         | * | P0A6K3 |
| P0A6K3 | DEF_ECOLI  |   |   |         | * | P0A6K3 |
| P0C0V0 | DEGP_ECOLI | 1 | 1 | 100.00% | * | P0C0V0 |
| P0A6K6 | DEOB_ECOLI |   |   |         | * | P0A6K6 |
| P0A6K6 | DEOB_ECOLI |   |   |         | * | P0A6K6 |
| P0A6K6 | DEOB_ECOLI |   |   |         | * | P0A6K6 |
| P0A6K6 | DEOB_ECOLI |   |   |         | * | P0A6K6 |
| P0A6L0 | DEOC_ECOLI |   |   |         | * | P0A6L0 |
| P0A6L0 | DEOC_ECOLI |   |   |         | * | P0A6L0 |
| P0A6L0 | DEOC_ECOLI |   |   |         | * | P0A6L0 |
| P0ABP8 | DEOD_ECOLI | 0 | 1 | 0.00%   | * | P0ABP8 |
| P76015 | DHAK_ECOLI |   |   |         | * | P76015 |
| P76015 | DHAK_ECOLI |   |   |         | * | P76015 |
| P37349 | DHAM_ECOLI |   |   |         |   | none   |
| P76016 | DHAR_ECOLI |   |   |         |   | none   |
| P0A9Q9 | DHAS_ECOLI | 1 | 1 | 100.00% | * | P0A9Q9 |
| P00393 | DHNA_ECOLI |   |   |         | * | P00393 |
| P00393 | DHNA_ECOLI |   |   |         | * | P00393 |
| P00393 | DHNA_ECOLI |   |   |         | * | P00393 |
| P00393 | DHNA_ECOLI |   |   |         | * | P00393 |
| P00393 | DHNA_ECOLI |   |   |         | * | P00393 |
| P00393 | DHNA_ECOLI |   |   |         | * | P00393 |
| P0AC13 | DHPS_ECOLI |   |   |         |   | none   |
| P0AC41 | DHSA_ECOLI |   |   |         | * | P0AC41 |
| P0AC41 | DHSA_ECOLI |   |   |         | * | P0AC41 |
| P0AC41 | DHSA_ECOLI |   |   |         | * | P0AC41 |
| P0AC41 | DHSA_ECOLI |   |   |         | * | P0AC41 |
| P0AC41 | DHSA_ECOLI |   |   |         | * | P0AC41 |

















|        |            |          |
|--------|------------|----------|
| P0A6Q3 | FABA_ECOLI | * P0A6Q3 |
| P0A6Q3 | FABA_ECOLI | * P0A6Q3 |
| P0A953 | FABB_ECOLI | * P0A953 |
| P0AAI9 | FABD_ECOLI | * P0AAI9 |
| P0AAI9 | FABD_ECOLI | * P0AAI9 |
| P0AAI5 | FABF_ECOLI | * P0AAI5 |
| P0AEK2 | FABG_ECOLI | * P0AEK2 |
| P0A6R0 | FABH_ECOLI | * P0A6R0 |
| P0A6R0 | FABH_ECOLI | * P0A6R0 |
| P0A6R0 | FABH_ECOLI | * P0A6R0 |
| P0AEK4 | FABI_ECOLI | * P0AEK4 |
| P0ACU5 | FABR_ECOLI | none     |
| P0A6Q6 | FABZ_ECOLI | * P0A6Q6 |

|        |            |          |
|--------|------------|----------|
| P0A6Q6 | FABZ_ECOLI | * P0A6Q6 |
| P25401 | FAEE_ECOLX | none     |
| P23774 | FAPR_ECOLX | none     |
| P13024 | FDHE_ECOLI | * P13024 |
| P24183 | FDNG_ECOLI | * P24183 |
| P24183 | FDNG_ECOLI | * P24183 |

|        |             |          |
|--------|-------------|----------|
| P24183 | FDNG_ECOLI  | * P24183 |
|        |             |          |
| P32176 | FDOG_ECOLI  | * P32176 |
|        |             |          |
| P15029 | FECD_ECOLI  | none     |
|        |             |          |
| P23877 | FEPG_ECOLI  | none     |
|        |             |          |
| P0A9R4 | FER_ECOLI   | * P0A9R4 |
|        |             |          |
| Q47153 | FHIA_ECOLI  | * Q47153 |
| Q47153 | FHIA_ECOLI  | * Q47153 |
|        |             |          |
| P04128 | FIMA1_ECOLI | none     |
|        |             |          |
| P31697 | FIMC_ECOLI  | * P31697 |
|        |             |          |
| P08189 | FIMF_ECOLI  | none     |

|        |            |          |
|--------|------------|----------|
| P08190 | FIMG_ECOLI | none     |
| P08191 | FIMH_ECOLI | none     |
| P0A6R3 | FIS_ECOLI  | * P0A6R3 |
| P45523 | FKBA_ECOLI | * P45523 |
| P0A9L3 | FKBB_ECOLI | * P0A9L3 |

|        |            |          |
|--------|------------|----------|
| P61949 | FLAV_ECOLI | * P61949 |
| P75933 | FLGA_ECOLI | none     |
| P04949 | FLIC_ECOLI | * P04949 |
| P15070 | FLIN_ECOLI | * P15070 |
| P15070 | FLIN_ECOLI | * P15070 |
| P15070 | FLIN_ECOLI | * P15070 |
| P0ABY2 | FLIT_ECOLI | * P0ABY2 |
| P23882 | FMT_ECOLI  | * P23882 |

|        |            |   |   |         |   |        |
|--------|------------|---|---|---------|---|--------|
| P23882 | FMT_ECOLI  |   |   |         | * | P23882 |
| P23882 | FMT_ECOLI  |   |   |         | * | P23882 |
| P23882 | FMT_ECOLI  |   |   |         | * | P23882 |
| P23882 | FMT_ECOLI  |   |   |         | * | P23882 |
| P23882 | FMT_ECOLI  |   |   |         | * | P23882 |
| P23882 | FMT_ECOLI  |   |   |         | * | P23882 |
| P23882 | FMT_ECOLI  |   |   |         | * | P23882 |
|        |            |   |   |         |   |        |
| P0A9E5 | FNR_ECOLI  |   |   |         | * | P0A9E5 |
| P0A9E5 | FNR_ECOLI  |   |   |         | * | P0A9E5 |
| P0A9E5 | FNR_ECOLI  |   |   |         | * | P0A9E5 |
| P0A9E5 | FNR_ECOLI  |   |   |         | * | P0A9E5 |
|        |            |   |   |         |   |        |
| P0AC16 | FOLB_ECOLI | 0 | 1 | 0.00%   | * | P0AC16 |
|        |            |   |   |         |   |        |
| P0AC19 | FOLX_ECOLI | 1 | 1 | 100.00% | * | P0AC19 |
|        |            |   |   |         |   |        |
| P00363 | FRDA_ECOLI |   |   |         | * | P00363 |
| P00363 | FRDA_ECOLI |   |   |         | * | P00363 |
| P00363 | FRDA_ECOLI |   |   |         | * | P00363 |
| P00363 | FRDA_ECOLI |   |   |         | * | P00363 |
| P00363 | FRDA_ECOLI |   |   |         | * | P00363 |
| P00363 | FRDA_ECOLI |   |   |         | * | P00363 |
| P00363 | FRDA_ECOLI |   |   |         | * | P00363 |
| P00363 | FRDA_ECOLI |   |   |         | * | P00363 |
| P00363 | FRDA_ECOLI |   |   |         | * | P00363 |
| P00363 | FRDA_ECOLI |   |   |         | * | P00363 |
| P00363 | FRDA_ECOLI |   |   |         | * | P00363 |
| P00363 | FRDA_ECOLI |   |   |         | * | P00363 |
| P00363 | FRDA_ECOLI |   |   |         | * | P00363 |
| P00363 | FRDA_ECOLI |   |   |         | * | P00363 |
| P00363 | FRDA_ECOLI |   |   |         | * | P00363 |
| P00363 | FRDA_ECOLI |   |   |         | * | P00363 |
| P00363 | FRDA_ECOLI |   |   |         | * | P00363 |
| P00363 | FRDA_ECOLI |   |   |         | * | P00363 |
| P00363 | FRDA_ECOLI |   |   |         | * | P00363 |
|        |            |   |   |         |   |        |
| P0AC47 | FRDB_ECOLI | 1 | 1 | 100.00% | * | P0AC47 |
|        |            |   |   |         |   |        |
| P0AEN1 | FRE_ECOLI  |   |   |         | * | P0AEN1 |
| P0AEN1 | FRE_ECOLI  |   |   |         | * | P0AEN1 |
| P0AEN1 | FRE_ECOLI  |   |   |         | * | P0AEN1 |
| P0AEN1 | FRE_ECOLI  |   |   |         | * | P0AEN1 |
| P0AEN1 | FRE_ECOLI  |   |   |         | * | P0AEN1 |



|        |            |   |   |         |  |          |
|--------|------------|---|---|---------|--|----------|
| P0A9A6 | FTSZ_ECOLI |   |   |         |  | * P0A9A6 |
| P0A9A6 | FTSZ_ECOLI |   |   |         |  | * P0A9A6 |
| P0A9A6 | FTSZ_ECOLI |   |   |         |  | * P0A9A6 |
| P0A9A6 | FTSZ_ECOLI |   |   |         |  | * P0A9A6 |
| P0A9A6 | FTSZ_ECOLI |   |   |         |  | * P0A9A6 |
| P0AEN8 | FUCM_ECOLI |   |   |         |  | * P0AEN8 |
| P0AEN8 | FUCM_ECOLI |   |   |         |  | * P0AEN8 |
| P0AEN8 | FUCM_ECOLI |   |   |         |  | * P0AEN8 |
| P0AEN8 | FUCM_ECOLI |   |   |         |  | * P0AEN8 |
| P0AC33 | FUMA_ECOLI |   |   |         |  | * P0AC33 |
| P0AC33 | FUMA_ECOLI |   |   |         |  | * P0AC33 |
| P14407 | FUMB_ECOLI |   |   |         |  | * P14407 |
| P14407 | FUMB_ECOLI |   |   |         |  | * P14407 |
| P0A9A9 | FUR_ECOLI  | 1 | 1 | 100.00% |  | * P0A9A9 |
| P37147 | FXSA_ECOLI |   |   |         |  | * P37147 |
| P37147 | FXSA_ECOLI |   |   |         |  | * P37147 |
| P37147 | FXSA_ECOLI |   |   |         |  | * P37147 |
| P0A9B2 | G3P1_ECOLI |   |   |         |  | * P0A9B2 |
| P0A9B2 | G3P1_ECOLI |   |   |         |  | * P0A9B2 |
| P0A9B2 | G3P1_ECOLI |   |   |         |  | * P0A9B2 |
| P0A9B2 | G3P1_ECOLI |   |   |         |  | * P0A9B2 |
| P0A9B2 | G3P1_ECOLI |   |   |         |  | * P0A9B2 |
| P0A9B2 | G3P1_ECOLI |   |   |         |  | * P0A9B2 |
| P0A9B2 | G3P1_ECOLI |   |   |         |  | * P0A9B2 |
| P0A9B2 | G3P1_ECOLI |   |   |         |  | * P0A9B2 |
| P0A9B2 | G3P1_ECOLI |   |   |         |  | * P0A9B2 |
| P0AC53 | G6PD_ECOLI |   |   |         |  | * P0AC53 |
| P0AC53 | G6PD_ECOLI |   |   |         |  | * P0AC53 |
| P0AC53 | G6PD_ECOLI |   |   |         |  | * P0AC53 |
| P0AC53 | G6PD_ECOLI |   |   |         |  | * P0AC53 |
| P0A6T1 | G6PI_ECOLI |   |   |         |  | none     |
| P63235 | GADC_ECOLI |   |   |         |  | none     |
| P37639 | GADX_ECOLI |   |   |         |  | * P37639 |
| P37639 | GADX_ECOLI |   |   |         |  | * P37639 |



|        |            |          |
|--------|------------|----------|
| P09147 | GALE_ECOLI | * P09147 |
| P09147 | GALE_ECOLI | * P09147 |
| P09147 | GALE_ECOLI | * P09147 |
|        |            |          |
| P0AAB6 | GALF_ECOLI | * P0AAB6 |
|        |            |          |
| P0A9C3 | GALM_ECOLI | * P0A9C3 |
| P0A9C3 | GALM_ECOLI | * P0A9C3 |
| P0A9C3 | GALM_ECOLI | * P0A9C3 |
|        |            |          |
| P03024 | GALR_ECOLI | none     |
|        |            |          |
| P0AEP3 | GALU_ECOLI | none     |
|        |            |          |
| P0A9S3 | GATD_ECOLI | * P0A9S3 |
|        |            |          |
| P0C8J6 | GATY_ECOLI | * P0C8J6 |
|        |            |          |
| P0C8J8 | GATZ_ECOLI | * P0C8J8 |

|        |            |          |
|--------|------------|----------|
| POC8J8 | GATZ_ECOLI | * POC8J8 |
| POC8J8 | GATZ_ECOLI | * POC8J8 |
| POC8J9 | GATZ_ECOLX | none     |
| P33195 | GCSP_ECOLI | * P33195 |
| P27248 | GCST_ECOLI | * P27248 |
| P75913 | GHRA_ECOLI | none     |
| P0A9S5 | GLDA_ECOLI | none     |
| P37747 | GLF_ECOLI  | * P37747 |
| P37747 | GLF_ECOLI  | * P37747 |
| P37747 | GLF_ECOLI  | * P37747 |
| P0A6V8 | GLK_ECOLI  | * P0A6V8 |
| P0A6V8 | GLK_ECOLI  | * P0A6V8 |
| P0A6V8 | GLK_ECOLI  | * P0A6V8 |
| P17169 | GLMS_ECOLI | * P17169 |
| P0A9C5 | GLNA_ECOLI | * P0A9C5 |
| P0A9C5 | GLNA_ECOLI | * P0A9C5 |
| P0A9C5 | GLNA_ECOLI | * P0A9C5 |



|        |             |          |
|--------|-------------|----------|
| P0AC69 | GLRX4_ECOLI | * P0AC69 |
|        |             |          |
| P77454 | GLSA1_ECOLI | * P77454 |
| P77454 | GLSA1_ECOLI | * P77454 |
|        |             |          |
| P09831 | GLTB_ECOLI  | none     |
|        |             |          |
| P09832 | GLTD_ECOLI  | * P09832 |
| P09832 | GLTD_ECOLI  | * P09832 |
|        |             |          |
| P0A825 | GLYA_ECOLI  | * P0A825 |
|        |             |          |
| P63224 | GMHA_ECOLI  | none     |
|        |             |          |
| P63228 | GMHB_ECOLI  | * P63228 |
|        |             |          |
| P0AC92 | GNSA_ECOLI  | * P0AC92 |
|        |             |          |
| P77695 | GNSB_ECOLI  | none     |
|        |             |          |
| P0ACP5 | GNTR_ECOLI  | none     |
|        |             |          |
| P46846 | GNTX_ECOLI  | none     |
|        |             |          |
| P0A6S7 | GPDA_ECOLI  | * P0A6S7 |







|        |            |          |
|--------|------------|----------|
| POAES4 | GYRA_ECOLI | * POAES4 |
| POAES6 | GYRB_ECOLI | * POAES6 |
| P33012 | GYRI_ECOLI | none     |
| P31658 | HCHA_ECOLI | * P31658 |



|        |            |   |        |
|--------|------------|---|--------|
| P31658 | HCHA_ECOLI | * | P31658 |
| P31658 | HCHA_ECOLI | * | P31658 |
| P75824 | HCR_ECOLI  |   | none   |
| P0AES9 | HDEA_ECOLI |   | none   |
| P0AET2 | HDEB_ECOLI |   | none   |
| P0A8R9 | HDFR_ECOLI |   | none   |
| P0AET8 | HDHA_ECOLI | * | P0AET8 |
| P0AET8 | HDHA_ECOLI | * | P0AET8 |
| P0AET8 | HDHA_ECOLI | * | P0AET8 |
| P15038 | HELD_ECOLI | * | P15038 |
| P15038 | HELD_ECOLI | * | P15038 |
| P15038 | HELD_ECOLI | * | P15038 |
| P15038 | HELD_ECOLI | * | P15038 |
| P15038 | HELD_ECOLI | * | P15038 |
| P15038 | HELD_ECOLI | * | P15038 |
| P15038 | HELD_ECOLI | * | P15038 |
| P15038 | HELD_ECOLI | * | P15038 |
| P15038 | HELD_ECOLI | * | P15038 |
| P15038 | HELD_ECOLI | * | P15038 |
| P15038 | HELD_ECOLI | * | P15038 |
| P15038 | HELD_ECOLI | * | P15038 |
| P15038 | HELD_ECOLI | * | P15038 |
| P15038 | HELD_ECOLI | * | P15038 |
| P15038 | HELD_ECOLI | * | P15038 |
| P15038 | HELD_ECOLI | * | P15038 |
| P15038 | HELD_ECOLI | * | P15038 |
| P15038 | HELD_ECOLI | * | P15038 |
| P15038 | HELD_ECOLI | * | P15038 |
| P15038 | HELD_ECOLI | * | P15038 |
| P15038 | HELD_ECOLI | * | P15038 |
| P15038 | HELD_ECOLI | * | P15038 |
| P15038 | HELD_ECOLI | * | P15038 |
| P15038 | HELD_ECOLI | * | P15038 |
| P15038 | HELD_ECOLI | * | P15038 |
| P15038 | HELD_ECOLI | * | P15038 |
| P15038 | HELD_ECOLI | * | P15038 |
| P15038 | HELD_ECOLI | * | P15038 |
| P15038 | HELD_ECOLI | * | P15038 |
| P15038 | HELD_ECOLI | * | P15038 |
| P0ACB2 | HEM2_ECOLI | * | P0ACB2 |
| P0ACB2 | HEM2_ECOLI | * | P0ACB2 |
| P0ACB2 | HEM2_ECOLI | * | P0ACB2 |
| P0ABC3 | HFLC_ECOLI | * | P0ABC3 |







|        |            |          |
|--------|------------|----------|
| P0ACF8 | HNS_ECOLI  | * P0ACF8 |
| Q57160 | HPAB_ECOLX | none     |
| Q46978 | HPAG_ECOLX | none     |
| P37352 | HPCE_ECOLX | none     |
| Q47098 | HPCH_ECOLX | none     |
| P0A9M2 | HPRT_ECOLI | none     |
| P43329 | HRPA_ECOLI | * P43329 |
| P0A6Z1 | HSCA_ECOLI | * P0A6Z1 |









|        |            |          |
|--------|------------|----------|
| P0A7B8 | HSLV_ECOLI | * P0A7B8 |
| P0A6Z3 | HTPG_ECOLI | * P0A6Z3 |
| P37180 | HYBB_ECOLI | none     |
| P37182 | HYBD_ECOLI | * P37182 |
| P0AEV4 | HYCA_ECOLI | none     |
| P0AAK1 | HYCB_ECOLI | none     |
| P77423 | HYFH_ECOLI | none     |
| P30131 | HYPF_ECOLI | none     |
| P39377 | IADA_ECOLI | * P39377 |
| P39377 | IADA_ECOLI | * P39377 |







P0A7A9 IPYR\_ECOLI  
P0A7A9 IPYR\_ECOLI

P0AAC8 ISCA\_ECOLI  
P0AAC8 ISCA\_ECOLI  
P0AAC8 ISCA\_ECOLI  
P0AAC8 ISCA\_ECOLI  
P0AAC8 ISCA\_ECOLI  
P0A6B7 ISCS\_ECOLI  
P0A6B7 ISCS\_ECOLI

Q46893 ISPD\_ECOLI

\* P0A7A9  
\* P0A7A9

\* P0AAC8  
\* P0AAC8  
\* P0AAC8  
\* P0AAC8  
\* P0AAC8  
\* P0A6B7  
\* P0A6B7

none



|        |             |          |
|--------|-------------|----------|
| P04951 | KDSB_ECOLI  | * P04951 |
| P0ABZ4 | KDSC_ECOLI  | * P0ABZ4 |
| P0ABZ4 | KDSC_ECOLI  | * P0ABZ4 |
| P77338 | KEFA_ECOLI  | none     |
| P60546 | KGUA_ECOLI  | * P60546 |
| P00547 | KHSE_ECOLI  | * P00547 |
| P00547 | KHSE_ECOLI  | * P00547 |
| Q52328 | KLAB_ECOLX  | none     |
| Q52313 | KORB1_ECOLX | none     |
| P0A717 | KPRS_ECOLI  | * P0A717 |
| P0A717 | KPRS_ECOLI  | * P0A717 |
| P0AD61 | KPYK1_ECOLI | * P0AD61 |
| P21599 | KPYK2_ECOLI | * P21599 |





|        |            |          |
|--------|------------|----------|
| P33232 | LLDD_ECOLI | * P33232 |
| P0A9M0 | LON_ECOLI  | * P0A9M0 |
| P75867 | LONH_ECOLI | none     |
| P69776 | LPP_ECOLI  | * P69776 |
| P69776 | LPP_ECOLI  | * P69776 |
| P0A722 | LPXA_ECOLI | * P0A722 |





|        |            |   |   |         |   |        |
|--------|------------|---|---|---------|---|--------|
| P21645 | LPXD_ECOLI |   |   |         | * | P21645 |
| P21645 | LPXD_ECOLI |   |   |         | * | P21645 |
| P21645 | LPXD_ECOLI |   |   |         | * | P21645 |
| P21645 | LPXD_ECOLI |   |   |         | * | P21645 |
| P21645 | LPXD_ECOLI |   |   |         | * | P21645 |
| P21645 | LPXD_ECOLI |   |   |         | * | P21645 |
| P21645 | LPXD_ECOLI |   |   |         | * | P21645 |
| P21645 | LPXD_ECOLI |   |   |         | * | P21645 |
| P21645 | LPXD_ECOLI |   |   |         | * | P21645 |
| P21645 | LPXD_ECOLI |   |   |         | * | P21645 |
| P21645 | LPXD_ECOLI |   |   |         | * | P21645 |
| P21645 | LPXD_ECOLI |   |   |         | * | P21645 |
| P21645 | LPXD_ECOLI |   |   |         | * | P21645 |
| P21645 | LPXD_ECOLI |   |   |         | * | P21645 |
| P21645 | LPXD_ECOLI |   |   |         | * | P21645 |
| P21645 | LPXD_ECOLI |   |   |         | * | P21645 |
| P21645 | LPXD_ECOLI |   |   |         | * | P21645 |
| P21645 | LPXD_ECOLI |   |   |         | * | P21645 |
| P21645 | LPXD_ECOLI |   |   |         | * | P21645 |
| P21645 | LPXD_ECOLI |   |   |         | * | P21645 |
| P21645 | LPXD_ECOLI |   |   |         | * | P21645 |
| P21645 | LPXD_ECOLI |   |   |         | * | P21645 |
| P21645 | LPXD_ECOLI |   |   |         | * | P21645 |
| P21645 | LPXD_ECOLI |   |   |         | * | P21645 |
| P21645 | LPXD_ECOLI |   |   |         | * | P21645 |
| P21645 | LPXD_ECOLI |   |   |         | * | P21645 |
| P0ACJ0 | LRP_ECOLI  |   |   |         | * | P0ACJ0 |
| P0ACJ0 | LRP_ECOLI  |   |   |         | * | P0ACJ0 |
| P75823 | LTAE_ECOLI | 1 | 1 | 100.00% | * | P75823 |
| P45578 | LUXS_ECOLI |   |   |         | * | P45578 |
| P45578 | LUXS_ECOLI |   |   |         | * | P45578 |
| P45578 | LUXS_ECOLI |   |   |         | * | P45578 |
| P78285 | LYSD_ECOLI | 1 | 1 | 100.00% | * | P78285 |
| P03030 | LYSR_ECOLI | 0 | 1 | 0.00%   | * | P03030 |
| P0AEX9 | MALE_ECOLI |   |   |         |   | none   |
| P68187 | MALK_ECOLI |   |   |         |   | none   |
| P15977 | MALQ_ECOLI |   |   |         |   | none   |

|        |            |   |   |         |   |        |
|--------|------------|---|---|---------|---|--------|
| P06993 | MALT_ECOLI |   |   |         | * | P06993 |
| P06993 | MALT_ECOLI |   |   |         | * | P06993 |
| P06993 | MALT_ECOLI |   |   |         | * | P06993 |
| P06993 | MALT_ECOLI |   |   |         | * | P06993 |
| P06993 | MALT_ECOLI |   |   |         | * | P06993 |
| P06993 | MALT_ECOLI |   |   |         | * | P06993 |
| P06993 | MALT_ECOLI |   |   |         | * | P06993 |
| P06993 | MALT_ECOLI |   |   |         | * | P06993 |
| P06993 | MALT_ECOLI |   |   |         | * | P06993 |
| P06993 | MALT_ECOLI |   |   |         | * | P06993 |
| P00946 | MANA_ECOLI |   |   |         | * | P00946 |
| P00946 | MANA_ECOLI |   |   |         | * | P00946 |
| P00946 | MANA_ECOLI |   |   |         | * | P00946 |
| P00946 | MANA_ECOLI |   |   |         | * | P00946 |
| P00946 | MANA_ECOLI |   |   |         | * | P00946 |
| P00946 | MANA_ECOLI |   |   |         | * | P00946 |
| P00946 | MANA_ECOLI |   |   |         | * | P00946 |
| P00946 | MANA_ECOLI |   |   |         | * | P00946 |
| P00946 | MANA_ECOLI |   |   |         | * | P00946 |
| P00946 | MANA_ECOLI |   |   |         | * | P00946 |
| P00946 | MANA_ECOLI |   |   |         | * | P00946 |
| P00946 | MANA_ECOLI |   |   |         | * | P00946 |
| P00946 | MANA_ECOLI |   |   |         | * | P00946 |
| P00946 | MANA_ECOLI |   |   |         | * | P00946 |
| P00946 | MANA_ECOLI |   |   |         | * | P00946 |
| P00946 | MANA_ECOLI |   |   |         | * | P00946 |
| P00946 | MANA_ECOLI |   |   |         | * | P00946 |
| P00946 | MANA_ECOLI |   |   |         | * | P00946 |
| P0AAY1 | MARC_ECOLI |   |   |         |   | none   |
| P08997 | MASY_ECOLI | 0 | 1 | 0.00%   | * | P08997 |
| P37330 | MASZ_ECOLI | 1 | 1 | 100.00% | * | P37330 |
| P0ACD8 | MBHL_ECOLI |   |   |         |   | none   |
| P69739 | MBHS_ECOLI |   |   |         |   | none   |
| P0AEY5 | MDAB_ECOLI |   |   |         | * | P0AEY5 |
| P0AEY5 | MDAB_ECOLI |   |   |         | * | P0AEY5 |



|        |            |   |   |         |          |
|--------|------------|---|---|---------|----------|
| P0A817 | METK_ECOLI |   |   |         | * P0A817 |
| P0A817 | METK_ECOLI |   |   |         | * P0A817 |
| P0A817 | METK_ECOLI |   |   |         | * P0A817 |
| P0A817 | METK_ECOLI |   |   |         | * P0A817 |
| P0A817 | METK_ECOLI |   |   |         | * P0A817 |
| P28635 | METQ_ECOLI | 1 | 1 | 100.00% | * P28635 |
| P30958 | MFD_ECOLI  |   |   |         | * P30958 |
| P30958 | MFD_ECOLI  |   |   |         | * P30958 |
| P30958 | MFD_ECOLI  |   |   |         | * P30958 |
| P30958 | MFD_ECOLI  |   |   |         | * P30958 |
| P30958 | MFD_ECOLI  |   |   |         | * P30958 |
| P30958 | MFD_ECOLI  |   |   |         | * P30958 |
| P30958 | MFD_ECOLI  |   |   |         | * P30958 |
| P30958 | MFD_ECOLI  |   |   |         | * P30958 |
| P0AEI1 | MIAB_ECOLI |   |   |         | * P0AEI1 |
| P0AEI1 | MIAB_ECOLI |   |   |         | * P0AEI1 |
| P0AEI1 | MIAB_ECOLI |   |   |         | * P0AEI1 |
| P0AEI1 | MIAB_ECOLI |   |   |         | * P0AEI1 |
| P0AEI1 | MIAB_ECOLI |   |   |         | * P0AEI1 |
| P0AEI1 | MIAB_ECOLI |   |   |         | * P0AEI1 |
| P0AEI1 | MIAB_ECOLI |   |   |         | * P0AEI1 |
| P0AEI1 | MIAB_ECOLI |   |   |         | * P0AEI1 |
| P0AEI1 | MIAB_ECOLI |   |   |         | * P0AEI1 |
| P0AEI1 | MIAB_ECOLI |   |   |         | * P0AEI1 |
| P0AEI1 | MIAB_ECOLI |   |   |         | * P0AEI1 |
| P0AEI1 | MIAB_ECOLI |   |   |         | * P0AEI1 |
| P18196 | MINC_ECOLI |   |   |         | * P18196 |
| P18196 | MINC_ECOLI |   |   |         | * P18196 |
| P18196 | MINC_ECOLI |   |   |         | * P18196 |
| P18196 | MINC_ECOLI |   |   |         | * P18196 |
| P18196 | MINC_ECOLI |   |   |         | * P18196 |
| P18196 | MINC_ECOLI |   |   |         | * P18196 |
| P18196 | MINC_ECOLI |   |   |         | * P18196 |
| P18196 | MINC_ECOLI |   |   |         | * P18196 |
| P18196 | MINC_ECOLI |   |   |         | * P18196 |
| P0AEZ3 | MIND_ECOLI |   |   |         | none     |
| P0A734 | MINE_ECOLI |   |   |         | * P0A734 |
| P0A734 | MINE_ECOLI |   |   |         | * P0A734 |
| P0A734 | MINE_ECOLI |   |   |         | * P0A734 |

|        |             |          |
|--------|-------------|----------|
| P0A734 | MINE_ECOLI  | * P0A734 |
| P0A734 | MINE_ECOLI  | * P0A734 |
| P0A734 | MINE_ECOLI  | * P0A734 |
| P0ADV7 | MLAC_ECOLI  | * P0ADV7 |
| P0ADV7 | MLAC_ECOLI  | * P0ADV7 |
| P64604 | MLAD_ECOLI  | none     |
| P64606 | MLAE_ECOLI  | none     |
| Q47690 | MMUM_ECOLI  | * Q47690 |
| Q47690 | MMUM_ECOLI  | * Q47690 |
| P54746 | MNGB_ECOLI  | * P54746 |
| P13669 | MNGR_ECOLI  | * P13669 |
| P25745 | MNMA_ECOLI  | * P25745 |
| P25745 | MNMA_ECOLI  | * P25745 |
| P30745 | MOAA_ECOLI  | * P30745 |
| P0AEZ9 | MOAB_ECOLI  | * P0AEZ9 |
| P0AEZ9 | MOAB_ECOLI  | * P0AEZ9 |
| P08098 | MOBA1_ECOLX | none     |





|        |            |          |
|--------|------------|----------|
| P0A9X4 | MREB_ECOLI | * P0A9X4 |
| P16926 | MREC_ECOLI | none     |
| P0AF08 | MRP_ECOLI  | * P0AF08 |
| P24202 | MRR_ECOLI  | none     |



|        |            |          |
|--------|------------|----------|
| P22524 | MUKE_ECOLI | * P22524 |
| P0A749 | MURA_ECOLI | * P0A749 |
| P23909 | MUTS_ECOLI | * P23909 |
| P08337 | MUTT_ECOLI | none     |
| P18843 | NADE_ECOLI | * P18843 |
| P18843 | NADE_ECOLI | * P18843 |
| P18843 | NADE_ECOLI | * P18843 |











|        |            |          |
|--------|------------|----------|
| P0A780 | NUSB_ECOLI | * P0A780 |
| P0AFG3 | ODO1_ECOLI | * P0AFG3 |
| P0AFG6 | ODO2_ECOLI | * P0AFG6 |
| P0AFG8 | ODP1_ECOLI | none     |
| P06959 | ODP2_ECOLI | * P06959 |
| P0A910 | OMPA_ECOLI | * P0A910 |
| P0A910 | OMPA_ECOLI | * P0A910 |
| P06996 | OMPC_ECOLI | none     |
| P0AA16 | OMPR_ECOLI | * P0AA16 |
| P0AA16 | OMPR_ECOLI | * P0AA16 |

|        |            |          |
|--------|------------|----------|
| P0AA16 | OMPR_ECOLI | * P0AA16 |
| P0AA16 | OMPR_ECOLI | * P0AA16 |
| P09169 | OMPT_ECOLI | none     |
| P27298 | OPDA_ECOLI | * P27298 |
| P27298 | OPDA_ECOLI | * P27298 |
| P33136 | OPGG_ECOLI | * P33136 |
| P23843 | OPPA_ECOLI | none     |
| P0A784 | ORN_ECOLI  | none     |
| POCOL2 | OSMC_ECOLI | * POCOL2 |
| P33362 | OSMF_ECOLI | * P33362 |
| P33362 | OSMF_ECOLI | * P33362 |
| P31677 | OTSA_ECOLI | none     |
| P0ACQ4 | OXYR_ECOLI | none     |
| P31663 | PANC_ECOLI | * P31663 |
| P0AFI2 | PARC_ECOLI | * P0AFI2 |
| P0AFI2 | PARC_ECOLI | * P0AFI2 |

|        |            |          |
|--------|------------|----------|
| P0AFI2 | PARC_ECOLI | * P0AFI2 |
| P02919 | PBPB_ECOLI | P02919-2 |
| P02919 | PBPB_ECOLI | P02919-2 |
| P02919 | PBPB_ECOLI | * P02919 |
| P02919 | PBPB_ECOLI | * P02919 |
| P02919 | PBPB_ECOLI | * P02919 |
| P02919 | PBPB_ECOLI | P02919-2 |
| P02919 | PBPB_ECOLI | P02919-2 |
| P02919 | PBPB_ECOLI | P02919-2 |
| P22259 | PCKA_ECOLI | * P22259 |
| P22259 | PCKA_ECOLI | * P22259 |
| P22259 | PCKA_ECOLI | * P22259 |
| P0ABF1 | PCNB_ECOLI | none     |
| P0ACL9 | PDHR_ECOLI | * P0ACL9 |
| P19624 | PDXA_ECOLI | none     |
| P40191 | PDXK_ECOLI | * P40191 |
| P40191 | PDXK_ECOLI | * P40191 |







|        |             |          |
|--------|-------------|----------|
| P0A9K3 | PHOL_ECOLI  | * P0A9K3 |
| P0A9K3 | PHOL_ECOLI  | * P0A9K3 |
| P23836 | PHOP_ECOLI  | * P23836 |
| P00490 | PHSM_ECOLI  | * P00490 |
| Q46806 | PHYDA_ECOLI | * Q46806 |
| Q46806 | PHYDA_ECOLI | * Q46806 |
| P0AFK0 | PMBA_ECOLI  | * P0AFK0 |
| P37590 | PMRD_ECOLI  | * P37590 |
| P05055 | PNP_ECOLI   | * P05055 |
| P05055 | PNP_ECOLI   | * P05055 |

|        |            |   |        |
|--------|------------|---|--------|
| P05055 | PNP_ECOLI  | * | P05055 |
| P05055 | PNP_ECOLI  | * | P05055 |
| P05055 | PNP_ECOLI  | * | P05055 |
| P05055 | PNP_ECOLI  | * | P05055 |
| P05055 | PNP_ECOLI  | * | P05055 |
| P05055 | PNP_ECOLI  | * | P05055 |
| P05055 | PNP_ECOLI  | * | P05055 |
| P05055 | PNP_ECOLI  | * | P05055 |
| P05055 | PNP_ECOLI  | * | P05055 |
| P05055 | PNP_ECOLI  | * | P05055 |
| P05055 | PNP_ECOLI  | * | P05055 |
| P05055 | PNP_ECOLI  | * | P05055 |
| P05055 | PNP_ECOLI  | * | P05055 |
| P05055 | PNP_ECOLI  | * | P05055 |
| P05055 | PNP_ECOLI  | * | P05055 |
| P05055 | PNP_ECOLI  | * | P05055 |
| P05055 | PNP_ECOLI  | * | P05055 |
| P05055 | PNP_ECOLI  | * | P05055 |
| P05055 | PNP_ECOLI  | * | P05055 |
| P05055 | PNP_ECOLI  | * | P05055 |
| P05055 | PNP_ECOLI  | * | P05055 |
| P05055 | PNP_ECOLI  | * | P05055 |
| P05055 | PNP_ECOLI  | * | P05055 |
| P05055 | PNP_ECOLI  | * | P05055 |
| P05055 | PNP_ECOLI  | * | P05055 |
| P05055 | PNP_ECOLI  | * | P05055 |
| P05055 | PNP_ECOLI  | * | P05055 |
| P05055 | PNP_ECOLI  | * | P05055 |
| P05055 | PNP_ECOLI  | * | P05055 |
| P05055 | PNP_ECOLI  | * | P05055 |
| P05055 | PNP_ECOLI  | * | P05055 |
| P05055 | PNP_ECOLI  | * | P05055 |
| P05055 | PNP_ECOLI  | * | P05055 |
| P05055 | PNP_ECOLI  | * | P05055 |
| P05055 | PNP_ECOLI  | * | P05055 |
| P05055 | PNP_ECOLI  | * | P05055 |
| P05055 | PNP_ECOLI  | * | P05055 |
| P07001 | PNTA_ECOLI |   | none   |
| P0AFL1 | POTI_ECOLI |   | none   |



|        |            |   |   |         |   |        |
|--------|------------|---|---|---------|---|--------|
| P23869 | PPIB_ECOLI |   |   |         | * | P23869 |
| P23869 | PPIB_ECOLI |   |   |         | * | P23869 |
| P23869 | PPIB_ECOLI |   |   |         | * | P23869 |
| P23869 | PPIB_ECOLI |   |   |         | * | P23869 |
| P23869 | PPIB_ECOLI |   |   |         | * | P23869 |
| P23869 | PPIB_ECOLI |   |   |         | * | P23869 |
| P23869 | PPIB_ECOLI |   |   |         | * | P23869 |
| P23869 | PPIB_ECOLI |   |   |         | * | P23869 |
| P23869 | PPIB_ECOLI |   |   |         | * | P23869 |
| P23869 | PPIB_ECOLI |   |   |         | * | P23869 |
| P23869 | PPIB_ECOLI |   |   |         | * | P23869 |
| P23869 | PPIB_ECOLI |   |   |         | * | P23869 |
| P23869 | PPIB_ECOLI |   |   |         | * | P23869 |
| P23869 | PPIB_ECOLI |   |   |         | * | P23869 |
| P23869 | PPIB_ECOLI |   |   |         | * | P23869 |
| P23869 | PPIB_ECOLI |   |   |         | * | P23869 |
| P23869 | PPIB_ECOLI |   |   |         | * | P23869 |
| P23869 | PPIB_ECOLI |   |   |         | * | P23869 |
| P23869 | PPIB_ECOLI |   |   |         | * | P23869 |
| P23869 | PPIB_ECOLI |   |   |         | * | P23869 |
| P0A7B1 | PPK_ECOLI  |   |   |         | * | P0A7B1 |
| P0A7B1 | PPK_ECOLI  |   |   |         | * | P0A7B1 |
| P0A7B1 | PPK_ECOLI  |   |   |         | * | P0A7B1 |
| P0A7B1 | PPK_ECOLI  |   |   |         | * | P0A7B1 |
| P0A7B1 | PPK_ECOLI  |   |   |         | * | P0A7B1 |
| P0A7B1 | PPK_ECOLI  |   |   |         | * | P0A7B1 |
| P0A7B1 | PPK_ECOLI  |   |   |         | * | P0A7B1 |
| P23538 | PPSA_ECOLI | 1 | 1 | 100.00% | * | P23538 |
| P23862 | PRIC_ECOLI |   |   |         | * | P23862 |
| P23862 | PRIC_ECOLI |   |   |         | * | P23862 |
| P23862 | PRIC_ECOLI |   |   |         | * | P23862 |
| P23862 | PRIC_ECOLI |   |   |         | * | P23862 |
| P23862 | PRIC_ECOLI |   |   |         | * | P23862 |
| P23862 | PRIC_ECOLI |   |   |         | * | P23862 |
| P23862 | PRIC_ECOLI |   |   |         | * | P23862 |
| P23862 | PRIC_ECOLI |   |   |         | * | P23862 |
| P23862 | PRIC_ECOLI |   |   |         | * | P23862 |
| P45577 | PROQ_ECOLI |   |   |         |   | none   |
| P77243 | PRPD_ECOLI |   |   |         | * | P77243 |









|        |            |    |    |         |          |
|--------|------------|----|----|---------|----------|
| P69407 | RCSB_ECOLI |    |    |         | * P69407 |
| P69407 | RCSB_ECOLI |    |    |         | * P69407 |
| P69407 | RCSB_ECOLI |    |    |         | * P69407 |
| P69407 | RCSB_ECOLI |    |    |         | * P69407 |
| P69407 | RCSB_ECOLI |    |    |         | * P69407 |
| P69407 | RCSB_ECOLI |    |    |         | * P69407 |
| P69407 | RCSB_ECOLI |    |    |         | * P69407 |
| P69407 | RCSB_ECOLI |    |    |         | * P69407 |
| P69407 | RCSB_ECOLI |    |    |         | * P69407 |
| P69407 | RCSB_ECOLI |    |    |         | * P69407 |
| P69407 | RCSB_ECOLI |    |    |         | * P69407 |
| P69407 | RCSB_ECOLI |    |    |         | * P69407 |
| P69407 | RCSB_ECOLI |    |    |         | * P69407 |
| P69407 | RCSB_ECOLI | 18 | 34 | 52.94%  | * P69407 |
|        |            |    |    |         |          |
| P52061 | RDGB_ECOLI |    |    |         | * P52061 |
| P52061 | RDGB_ECOLI |    |    |         | * P52061 |
| P52061 | RDGB_ECOLI | 2  | 3  | 66.67%  | * P52061 |
|        |            |    |    |         |          |
| P36767 | RDGC_ECOLI | 1  | 1  | 100.00% | * P36767 |
|        |            |    |    |         |          |
| P0A7G6 | RECA_ECOLI |    |    |         | * P0A7G6 |
| P0A7G6 | RECA_ECOLI |    |    |         | * P0A7G6 |
| P0A7G6 | RECA_ECOLI |    |    |         | * P0A7G6 |
| P0A7G6 | RECA_ECOLI |    |    |         | * P0A7G6 |
| P0A7G6 | RECA_ECOLI | 3  | 5  | 60.00%  | * P0A7G6 |
|        |            |    |    |         |          |
| P0AG20 | RELA_ECOLI |    |    |         | * P0AG20 |
| P0AG20 | RELA_ECOLI |    |    |         | * P0AG20 |
| P0AG20 | RELA_ECOLI |    |    |         | * P0AG20 |
| P0AG20 | RELA_ECOLI |    |    |         | * P0AG20 |
| P0AG20 | RELA_ECOLI |    |    |         | * P0AG20 |
| P0AG20 | RELA_ECOLI |    |    |         | * P0AG20 |
| P0AG20 | RELA_ECOLI |    |    |         | * P0AG20 |
| P0AG20 | RELA_ECOLI |    |    |         | * P0AG20 |
| P0AG20 | RELA_ECOLI |    |    |         | * P0AG20 |
| P0AG20 | RELA_ECOLI |    |    |         | * P0AG20 |
| P0AG20 | RELA_ECOLI |    |    |         | * P0AG20 |
| P0AG20 | RELA_ECOLI |    |    |         | * P0AG20 |
| P0AG20 | RELA_ECOLI | 9  | 13 | 69.23%  | * P0AG20 |
|        |            |    |    |         |          |
| P09980 | REP_ECOLI  |    |    |         | none     |
|        |            |    |    |         |          |
| P05833 | REPA_ECOLX |    |    |         | none     |
|        |            |    |    |         |          |
| P07012 | RF2_ECOLI  |    |    |         | * P07012 |

|        |             |   |    |         |          |
|--------|-------------|---|----|---------|----------|
| P07012 | RF2_ECOLI   |   |    |         | * P07012 |
| P07012 | RF2_ECOLI   |   |    |         | * P07012 |
| P07012 | RF2_ECOLI   |   |    |         | * P07012 |
| P07012 | RF2_ECOLI   |   |    |         | * P07012 |
| P07012 | RF2_ECOLI   |   |    |         | * P07012 |
| P07012 | RF2_ECOLI   |   |    |         | * P07012 |
| P07012 | RF2_ECOLI   |   |    |         | * P07012 |
| P07012 | RF2_ECOLI   |   |    |         | * P07012 |
| P07012 | RF2_ECOLI   |   |    |         | * P07012 |
| P07012 | RF2_ECOLI   |   |    |         | * P07012 |
| P07012 | RF2_ECOLI   | 4 | 12 | 33.33%  | * P07012 |
| P0A7I4 | RF3_ECOLI   |   |    |         | * P0A7I4 |
| P0A7I4 | RF3_ECOLI   |   |    |         | * P0A7I4 |
| P0A7I4 | RF3_ECOLI   | 3 | 3  | 100.00% | * P0A7I4 |
| P27127 | RFAB_ECOLI  | 1 | 1  | 100.00% | * P27127 |
| P37692 | RFAF_ECOLI  |   |    |         | * P37692 |
| P37692 | RFAF_ECOLI  |   |    |         | * P37692 |
| P37692 | RFAF_ECOLI  |   |    |         | * P37692 |
| P37692 | RFAF_ECOLI  |   |    |         | * P37692 |
| P37692 | RFAF_ECOLI  |   |    |         | * P37692 |
| P37692 | RFAF_ECOLI  |   |    |         | * P37692 |
| P37692 | RFAF_ECOLI  |   |    |         | * P37692 |
| P37692 | RFAF_ECOLI  |   |    |         | * P37692 |
| P37692 | RFAF_ECOLI  |   |    |         | * P37692 |
| P37692 | RFAF_ECOLI  | 9 | 10 | 90.00%  | * P37692 |
| P25740 | RFAG_ECOLI  |   |    |         | * P25740 |
| P25740 | RFAG_ECOLI  |   |    |         | * P25740 |
| P25740 | RFAG_ECOLI  |   |    |         | * P25740 |
| P25740 | RFAG_ECOLI  |   |    |         | * P25740 |
| P25740 | RFAG_ECOLI  |   |    |         | * P25740 |
| P25740 | RFAG_ECOLI  | 3 | 6  | 50.00%  | * P25740 |
| P25741 | RFAP_ECOLI  |   |    |         | * P25741 |
| P25741 | RFAP_ECOLI  |   |    |         | * P25741 |
| P25741 | RFAP_ECOLI  |   |    |         | * P25741 |
| P25741 | RFAP_ECOLI  |   |    |         | * P25741 |
| P25741 | RFAP_ECOLI  | 4 | 5  | 80.00%  | * P25741 |
| P37755 | RFBK9_ECOLX |   |    |         | none     |
| P0A8J8 | RHLB_ECOLI  |   |    |         | * P0A8J8 |







|        |            |    |    |         |          |
|--------|------------|----|----|---------|----------|
| POAEI4 | RIMO_ECOLI |    |    |         | * POAEI4 |
| POAEI4 | RIMO_ECOLI | 12 | 17 | 70.59%  | * POAEI4 |
| POA8A8 | RIMP_ECOLI |    |    |         | * POA8A8 |
| POA8A8 | RIMP_ECOLI |    |    |         | * POA8A8 |
| POA8A8 | RIMP_ECOLI | 2  | 3  | 66.67%  | * POA8A8 |
| POAFU8 | RISA_ECOLI |    |    |         | * POAFU8 |
| POAFU8 | RISA_ECOLI |    |    |         | * POAFU8 |
| POAFU8 | RISA_ECOLI | 1  | 3  | 33.33%  | * POAFU8 |
| POA7L0 | RL1_ECOLI  |    |    |         | none     |
| POA7J3 | RL10_ECOLI |    |    |         | * POA7J3 |
| POA7J3 | RL10_ECOLI | 2  | 2  | 100.00% | * POA7J3 |
| POA7J7 | RL11_ECOLI |    |    |         | * POA7J7 |
| POA7J7 | RL11_ECOLI |    |    |         | * POA7J7 |
| POA7J7 | RL11_ECOLI |    |    |         | * POA7J7 |
| POA7J7 | RL11_ECOLI |    |    |         | * POA7J7 |
| POA7J7 | RL11_ECOLI |    |    |         | * POA7J7 |
| POA7J7 | RL11_ECOLI | 2  | 6  | 33.33%  | * POA7J7 |
| POAA10 | RL13_ECOLI |    |    |         | * POAA10 |
| POAA10 | RL13_ECOLI | 0  | 2  | 0.00%   | * POAA10 |
| POADY3 | RL14_ECOLI |    |    |         | none     |
| P02413 | RL15_ECOLI |    |    |         | * P02413 |
| P02413 | RL15_ECOLI | 0  | 2  | 0.00%   | * P02413 |
| POADY7 | RL16_ECOLI |    |    |         | none     |
| POAG44 | RL17_ECOLI |    |    |         | * POAG44 |
| POAG44 | RL17_ECOLI |    |    |         | * POAG44 |
| POAG44 | RL17_ECOLI |    |    |         | * POAG44 |
| POAG44 | RL17_ECOLI | 2  | 4  | 50.00%  | * POAG44 |
| POC018 | RL18_ECOLI |    |    |         | * POC018 |
| POC018 | RL18_ECOLI |    |    |         | * POC018 |
| POC018 | RL18_ECOLI | 1  | 3  | 33.33%  | * POC018 |
| POA7K6 | RL19_ECOLI | 0  | 1  | 0.00%   | * POA7K6 |
| P60422 | RL2_ECOLI  |    |    |         | * P60422 |

|        |            |   |   |         |          |
|--------|------------|---|---|---------|----------|
| P60422 | RL2_ECOLI  |   |   |         | * P60422 |
| P60422 | RL2_ECOLI  |   |   |         | * P60422 |
| P60422 | RL2_ECOLI  |   |   |         | * P60422 |
| P60422 | RL2_ECOLI  | 2 | 5 | 40.00%  | * P60422 |
| P0A7L3 | RL20_ECOLI |   |   |         | none     |
| P0AG48 | RL21_ECOLI |   |   |         | none     |
| P61175 | RL22_ECOLI |   |   |         | * P61175 |
| P61175 | RL22_ECOLI |   |   |         | * P61175 |
| P61175 | RL22_ECOLI | 0 | 3 | 0.00%   | * P61175 |
| P0ADZ0 | RL23_ECOLI | 1 | 1 | 100.00% | * P0ADZ0 |
| P60624 | RL24_ECOLI | 0 | 1 | 0.00%   | * P60624 |
| P68919 | RL25_ECOLI | 1 | 1 | 100.00% | * P68919 |
| P0A7L8 | RL27_ECOLI |   |   |         | * P0A7L8 |
| P0A7L8 | RL27_ECOLI |   |   |         | * P0A7L8 |
| P0A7L8 | RL27_ECOLI |   |   |         | * P0A7L8 |
| P0A7L8 | RL27_ECOLI | 2 | 4 | 50.00%  | * P0A7L8 |
| P0A7M2 | RL28_ECOLI |   |   |         | none     |
| P60438 | RL3_ECOLI  |   |   |         | * P60438 |
| P60438 | RL3_ECOLI  |   |   |         | * P60438 |
| P60438 | RL3_ECOLI  |   |   |         | * P60438 |
| P60438 | RL3_ECOLI  |   |   |         | * P60438 |
| P60438 | RL3_ECOLI  |   |   |         | * P60438 |
| P60438 | RL3_ECOLI  |   |   |         | * P60438 |
| P60438 | RL3_ECOLI  | 2 | 7 | 28.57%  | * P60438 |
| P0AG51 | RL30_ECOLI |   |   |         | none     |
| P0A7N4 | RL32_ECOLI |   |   |         | none     |
| P0A7N9 | RL33_ECOLI |   |   |         | * P0A7N9 |
| P0A7N9 | RL33_ECOLI |   |   |         | * P0A7N9 |
| P0A7N9 | RL33_ECOLI |   |   |         | * P0A7N9 |
| P0A7N9 | RL33_ECOLI | 1 | 4 | 25.00%  | * P0A7N9 |
| P0A7Q1 | RL35_ECOLI |   |   |         | none     |

















|        |             |    |    |        |          |
|--------|-------------|----|----|--------|----------|
| P0AA39 | RLUC_ECOLI  |    |    |        | * P0AA39 |
| P0AA39 | RLUC_ECOLI  |    |    |        | * P0AA39 |
| P0AA39 | RLUC_ECOLI  |    |    |        | * P0AA39 |
| P0AA39 | RLUC_ECOLI  |    |    |        | * P0AA39 |
| P0AA39 | RLUC_ECOLI  |    |    |        | * P0AA39 |
| P0AA39 | RLUC_ECOLI  |    |    |        | * P0AA39 |
| P0AA39 | RLUC_ECOLI  |    |    |        | * P0AA39 |
| P0AA39 | RLUC_ECOLI  |    |    |        | * P0AA39 |
| P0AA39 | RLUC_ECOLI  |    |    |        | * P0AA39 |
| P0AA39 | RLUC_ECOLI  |    |    |        | * P0AA39 |
| P0AA39 | RLUC_ECOLI  |    |    |        | * P0AA39 |
| P0AA39 | RLUC_ECOLI  |    |    |        | * P0AA39 |
| P0AA39 | RLUC_ECOLI  |    |    |        | * P0AA39 |
| P0AA39 | RLUC_ECOLI  |    |    |        | * P0AA39 |
| P0AA39 | RLUC_ECOLI  |    |    |        | * P0AA39 |
| P0AA39 | RLUC_ECOLI  |    |    |        | * P0AA39 |
| P0AA39 | RLUC_ECOLI  |    |    |        | * P0AA39 |
| P0AA39 | RLUC_ECOLI  |    |    |        | * P0AA39 |
| P0AA39 | RLUC_ECOLI  |    |    |        | * P0AA39 |
| P0AA39 | RLUC_ECOLI  |    |    |        | * P0AA39 |
| P0AA39 | RLUC_ECOLI  |    |    |        | * P0AA39 |
| P0AA39 | RLUC_ECOLI  |    |    |        | * P0AA39 |
| P0AA39 | RLUC_ECOLI  |    |    |        | * P0AA39 |
| P0AA39 | RLUC_ECOLI  |    |    |        | * P0AA39 |
| P0AA39 | RLUC_ECOLI  |    |    |        | * P0AA39 |
| P0AA39 | RLUC_ECOLI  |    |    |        | * P0AA39 |
| P0AA39 | RLUC_ECOLI  |    |    |        | * P0AA39 |
| P0AA39 | RLUC_ECOLI  |    |    |        | * P0AA39 |
| P0AA39 | RLUC_ECOLI  | 86 | 93 | 92.47% | * P0AA39 |
| P0AFW2 | RMF_ECOLI   |    |    |        | none     |
| P37744 | RMLA1_ECOLI |    |    |        | * P37744 |
| P37744 | RMLA1_ECOLI |    |    |        | * P37744 |
| P37744 | RMLA1_ECOLI |    |    |        | * P37744 |
| P37744 | RMLA1_ECOLI |    |    |        | * P37744 |
| P37744 | RMLA1_ECOLI | 2  | 5  | 40.00% | * P37744 |
| P55253 | RMLA3_ECOLX |    |    |        | none     |
| P37759 | RMLB1_ECOLI |    |    |        | * P37759 |
| P37759 | RMLB1_ECOLI |    |    |        | * P37759 |
| P37759 | RMLB1_ECOLI | 1  | 3  | 33.33% | * P37759 |















|        |            |    |    |        |   |        |
|--------|------------|----|----|--------|---|--------|
| P0A7Z4 | RPOA_ECOLI |    |    |        | * | P0A7Z4 |
| P0A7Z4 | RPOA_ECOLI |    |    |        | * | P0A7Z4 |
| P0A7Z4 | RPOA_ECOLI |    |    |        | * | P0A7Z4 |
| P0A7Z4 | RPOA_ECOLI |    |    |        | * | P0A7Z4 |
| P0A7Z4 | RPOA_ECOLI |    |    |        | * | P0A7Z4 |
| P0A7Z4 | RPOA_ECOLI |    |    |        | * | P0A7Z4 |
| P0A7Z4 | RPOA_ECOLI |    |    |        | * | P0A7Z4 |
| P0A7Z4 | RPOA_ECOLI |    |    |        | * | P0A7Z4 |
| P0A7Z4 | RPOA_ECOLI |    |    |        | * | P0A7Z4 |
| P0A7Z4 | RPOA_ECOLI |    |    |        | * | P0A7Z4 |
| P0A7Z4 | RPOA_ECOLI |    |    |        | * | P0A7Z4 |
| P0A7Z4 | RPOA_ECOLI |    |    |        | * | P0A7Z4 |
| P0A7Z4 | RPOA_ECOLI |    |    |        | * | P0A7Z4 |
| P0A7Z4 | RPOA_ECOLI |    |    |        | * | P0A7Z4 |
| P0A7Z4 | RPOA_ECOLI |    |    |        | * | P0A7Z4 |
| P0A7Z4 | RPOA_ECOLI |    |    |        | * | P0A7Z4 |
| P0A7Z4 | RPOA_ECOLI |    |    |        | * | P0A7Z4 |
| P0A7Z4 | RPOA_ECOLI |    |    |        | * | P0A7Z4 |
| P0A7Z4 | RPOA_ECOLI |    |    |        | * | P0A7Z4 |
| P0A7Z4 | RPOA_ECOLI |    |    |        | * | P0A7Z4 |
| P0A7Z4 | RPOA_ECOLI |    |    |        | * | P0A7Z4 |
| P0A7Z4 | RPOA_ECOLI |    |    |        | * | P0A7Z4 |
| P0A7Z4 | RPOA_ECOLI |    |    |        | * | P0A7Z4 |
| P0A7Z4 | RPOA_ECOLI |    |    |        | * | P0A7Z4 |
| P0A7Z4 | RPOA_ECOLI |    |    |        | * | P0A7Z4 |
| P0A7Z4 | RPOA_ECOLI |    |    |        | * | P0A7Z4 |
| P0A7Z4 | RPOA_ECOLI |    |    |        | * | P0A7Z4 |
| P0A7Z4 | RPOA_ECOLI |    |    |        | * | P0A7Z4 |
| P0A7Z4 | RPOA_ECOLI |    |    |        | * | P0A7Z4 |
| P0A7Z4 | RPOA_ECOLI |    |    |        | * | P0A7Z4 |
| P0A7Z4 | RPOA_ECOLI |    |    |        | * | P0A7Z4 |
| P0A7Z4 | RPOA_ECOLI |    |    |        | * | P0A7Z4 |
| P0A7Z4 | RPOA_ECOLI |    |    |        | * | P0A7Z4 |
| P0A7Z4 | RPOA_ECOLI |    |    |        | * | P0A7Z4 |
| P0A7Z4 | RPOA_ECOLI |    |    |        | * | P0A7Z4 |
| P0A7Z4 | RPOA_ECOLI |    |    |        | * | P0A7Z4 |
| P0A7Z4 | RPOA_ECOLI | 67 | 76 | 88.16% | * | P0A7Z4 |
| P0A8V2 | RPOB_ECOLI |    |    |        | * | P0A8V2 |
| P0A8V2 | RPOB_ECOLI |    |    |        | * | P0A8V2 |
| P0A8V2 | RPOB_ECOLI |    |    |        | * | P0A8V2 |
| P0A8V2 | RPOB_ECOLI |    |    |        | * | P0A8V2 |











|        |            |    |    |        |          |
|--------|------------|----|----|--------|----------|
| POA776 | RPPH_ECOLI |    |    |        | * POA776 |
| POA776 | RPPH_ECOLI |    |    |        | * POA776 |
| POA776 | RPPH_ECOLI |    |    |        | * POA776 |
| POA776 | RPPH_ECOLI |    |    |        | * POA776 |
| POA776 | RPPH_ECOLI |    |    |        | * POA776 |
| POA776 | RPPH_ECOLI |    |    |        | * POA776 |
| POA776 | RPPH_ECOLI |    |    |        | * POA776 |
| POA776 | RPPH_ECOLI |    |    |        | * POA776 |
| POA776 | RPPH_ECOLI |    |    |        | * POA776 |
| POA776 | RPPH_ECOLI |    |    |        | * POA776 |
| POA776 | RPPH_ECOLI |    |    |        | * POA776 |
| POA776 | RPPH_ECOLI |    |    |        | * POA776 |
| POA776 | RPPH_ECOLI |    |    |        | * POA776 |
| POA776 | RPPH_ECOLI |    |    |        | * POA776 |
| POA776 | RPPH_ECOLI |    |    |        | * POA776 |
| POA776 | RPPH_ECOLI |    |    |        | * POA776 |
| POA776 | RPPH_ECOLI |    |    |        | * POA776 |
| POA776 | RPPH_ECOLI |    |    |        | * POA776 |
| POA776 | RPPH_ECOLI |    |    |        | * POA776 |
| POA776 | RPPH_ECOLI |    |    |        | * POA776 |
| POA776 | RPPH_ECOLI |    |    |        | * POA776 |
| POA776 | RPPH_ECOLI |    |    |        | * POA776 |
| POA776 | RPPH_ECOLI |    |    |        | * POA776 |
| POA776 | RPPH_ECOLI |    |    |        | * POA776 |
| POA776 | RPPH_ECOLI |    |    |        | * POA776 |
| POA776 | RPPH_ECOLI |    |    |        | * POA776 |
| POA776 | RPPH_ECOLI |    |    |        | * POA776 |
| POA776 | RPPH_ECOLI |    |    |        | * POA776 |
| POA776 | RPPH_ECOLI |    |    |        | * POA776 |
| POA776 | RPPH_ECOLI |    |    |        | * POA776 |
| POA776 | RPPH_ECOLI |    |    |        | * POA776 |
| POA776 | RPPH_ECOLI | 68 | 73 | 93.15% | * POA776 |
| POA8R0 | RRAA_ECOLI |    |    |        | * POA8R0 |
| POA8R0 | RRAA_ECOLI |    |    |        | * POA8R0 |
| POA8R0 | RRAA_ECOLI |    |    |        | * POA8R0 |
| POA8R0 | RRAA_ECOLI |    |    |        | * POA8R0 |
| POA8R0 | RRAA_ECOLI |    |    |        | * POA8R0 |
| POA8R0 | RRAA_ECOLI |    |    |        | * POA8R0 |
| POA8R0 | RRAA_ECOLI |    |    |        | * POA8R0 |
| POA8R0 | RRAA_ECOLI |    |    |        | * POA8R0 |
| POA8R0 | RRAA_ECOLI | 4  | 8  | 50.00% | * POA8R0 |
| POA805 | RRF_ECOLI  |    |    |        | * POA805 |
| POA805 | RRF_ECOLI  |    |    |        | * POA805 |
| POA805 | RRF_ECOLI  | 1  | 3  | 33.33% | * POA805 |
| POAG67 | RS1_ECOLI  |    |    |        | * POAG67 |
| POAG67 | RS1_ECOLI  |    |    |        | * POAG67 |
| POAG67 | RS1_ECOLI  |    |    |        | * POAG67 |
| POAG67 | RS1_ECOLI  |    |    |        | * POAG67 |



|        |            |   |   |         |          |
|--------|------------|---|---|---------|----------|
| P0AG67 | RS1_ECOLI  |   |   |         | * P0AG67 |
| P0AG67 | RS1_ECOLI  | 2 | 6 | 33.33%  | * P0AG67 |
| P0A7R5 | RS10_ECOLI |   |   |         | * P0A7R5 |
| P0A7R5 | RS10_ECOLI |   |   |         | * P0A7R5 |
| P0A7R5 | RS10_ECOLI | 3 | 3 | 100.00% | * P0A7R5 |
| P0A7R9 | RS11_ECOLI |   |   |         | none     |
| P0A7S3 | RS12_ECOLI |   |   |         | * P0A7S3 |
| P0A7S3 | RS12_ECOLI |   |   |         | * P0A7S3 |
| P0A7S3 | RS12_ECOLI |   |   |         | * P0A7S3 |
| P0A7S3 | RS12_ECOLI |   |   |         | * P0A7S3 |
| P0A7S3 | RS12_ECOLI | 2 | 5 | 40.00%  | * P0A7S3 |
| P0A7S9 | RS13_ECOLI | 0 | 1 | 0.00%   | * P0A7S9 |
| P0AG59 | RS14_ECOLI |   |   |         | * P0AG59 |
| P0AG59 | RS14_ECOLI |   |   |         | * P0AG59 |
| P0AG59 | RS14_ECOLI |   |   |         | * P0AG59 |
| P0AG59 | RS14_ECOLI | 1 | 4 | 25.00%  | * P0AG59 |
| P0ADZ4 | RS15_ECOLI |   |   |         | * P0ADZ4 |
| P0ADZ4 | RS15_ECOLI |   |   |         | * P0ADZ4 |
| P0ADZ4 | RS15_ECOLI |   |   |         | * P0ADZ4 |
| P0ADZ4 | RS15_ECOLI |   |   |         | * P0ADZ4 |
| P0ADZ4 | RS15_ECOLI |   |   |         | * P0ADZ4 |
| P0ADZ4 | RS15_ECOLI | 3 | 6 | 50.00%  | * P0ADZ4 |
| P0A7T3 | RS16_ECOLI |   |   |         | * P0A7T3 |
| P0A7T3 | RS16_ECOLI |   |   |         | * P0A7T3 |
| P0A7T3 | RS16_ECOLI |   |   |         | * P0A7T3 |
| P0A7T3 | RS16_ECOLI | 2 | 4 | 50.00%  | * P0A7T3 |
| P0AG63 | RS17_ECOLI |   |   |         | none     |
| P0A7T7 | RS18_ECOLI |   |   |         | * P0A7T7 |
| P0A7T7 | RS18_ECOLI | 0 | 2 | 0.00%   | * P0A7T7 |
| P0A7U3 | RS19_ECOLI |   |   |         | * P0A7U3 |
| P0A7U3 | RS19_ECOLI |   |   |         | * P0A7U3 |
| P0A7U3 | RS19_ECOLI | 0 | 3 | 0.00%   | * P0A7U3 |
| P0A7V0 | RS2_ECOLI  |   |   |         | * P0A7V0 |
| P0A7V0 | RS2_ECOLI  |   |   |         | * P0A7V0 |

|        |            |   |    |         |          |
|--------|------------|---|----|---------|----------|
| P0A7V0 | RS2_ECOLI  | 3 | 3  | 100.00% | * P0A7V0 |
| P0A7U7 | RS20_ECOLI |   |    |         | none     |
| P68679 | RS21_ECOLI |   |    |         | none     |
| P0A7V3 | RS3_ECOLI  | 0 | 1  | 0.00%   | * P0A7V3 |
| P0A7V8 | RS4_ECOLI  |   |    |         | * P0A7V8 |
| P0A7V8 | RS4_ECOLI  |   |    |         | * P0A7V8 |
| P0A7V8 | RS4_ECOLI  |   |    |         | * P0A7V8 |
| P0A7V8 | RS4_ECOLI  |   |    |         | * P0A7V8 |
| P0A7V8 | RS4_ECOLI  |   |    |         | * P0A7V8 |
| P0A7V8 | RS4_ECOLI  |   |    |         | * P0A7V8 |
| P0A7V8 | RS4_ECOLI  |   |    |         | * P0A7V8 |
| P0A7V8 | RS4_ECOLI  |   |    |         | * P0A7V8 |
| P0A7V8 | RS4_ECOLI  |   |    |         | * P0A7V8 |
| P0A7V8 | RS4_ECOLI  | 1 | 10 | 10.00%  | * P0A7V8 |
| P0A7W1 | RS5_ECOLI  |   |    |         | * P0A7W1 |
| P0A7W1 | RS5_ECOLI  |   |    |         | * P0A7W1 |
| P0A7W1 | RS5_ECOLI  |   |    |         | * P0A7W1 |
| P0A7W1 | RS5_ECOLI  |   |    |         | * P0A7W1 |
| P0A7W1 | RS5_ECOLI  |   |    |         | * P0A7W1 |
| P0A7W1 | RS5_ECOLI  |   |    |         | * P0A7W1 |
| P0A7W1 | RS5_ECOLI  |   |    |         | * P0A7W1 |
| P0A7W1 | RS5_ECOLI  | 3 | 8  | 37.50%  | * P0A7W1 |
| P02358 | RS6_ECOLI  |   |    |         | * P02358 |
| P02358 | RS6_ECOLI  |   |    |         | * P02358 |
| P02358 | RS6_ECOLI  |   |    |         | * P02358 |
| P02358 | RS6_ECOLI  |   |    |         | * P02358 |
| P02358 | RS6_ECOLI  |   |    |         | * P02358 |
| P02358 | RS6_ECOLI  | 3 | 6  | 50.00%  | * P02358 |
| P02359 | RS7_ECOLI  | 1 | 1  | 100.00% | * P02359 |
| P0A7W7 | RS8_ECOLI  |   |    |         | * P0A7W7 |
| P0A7W7 | RS8_ECOLI  |   |    |         | * P0A7W7 |
| P0A7X3 | RS9_ECOLI  |   |    |         | * P0A7X3 |
| P0A7X3 | RS9_ECOLI  |   |    |         | * P0A7X3 |
| P0A7X3 | RS9_ECOLI  | 0 | 3  | 0.00%   | * P0A7X3 |
| P06992 | RSMA_ECOLI |   |    |         | * P06992 |

|        |            |   |    |        |      |        |
|--------|------------|---|----|--------|------|--------|
| P06992 | RSMA_ECOLI |   |    |        | *    | P06992 |
| P06992 | RSMA_ECOLI | 2 | 3  | 66.67% | *    | P06992 |
| P36929 | RSMB_ECOLI |   |    |        | *    | P36929 |
| P36929 | RSMB_ECOLI |   |    |        | *    | P36929 |
| P36929 | RSMB_ECOLI |   |    |        | *    | P36929 |
| P36929 | RSMB_ECOLI |   |    |        | *    | P36929 |
| P36929 | RSMB_ECOLI |   |    |        | *    | P36929 |
| P36929 | RSMB_ECOLI |   |    |        | *    | P36929 |
| P36929 | RSMB_ECOLI |   |    |        | *    | P36929 |
| P36929 | RSMB_ECOLI |   |    |        | *    | P36929 |
| P36929 | RSMB_ECOLI |   |    |        | *    | P36929 |
| P36929 | RSMB_ECOLI |   |    |        | *    | P36929 |
| P36929 | RSMB_ECOLI | 8 | 12 | 66.67% | *    | P36929 |
| P39406 | RSMC_ECOLI |   |    |        | *    | P39406 |
| P39406 | RSMC_ECOLI |   |    |        | *    | P39406 |
| P39406 | RSMC_ECOLI |   |    |        | *    | P39406 |
| P39406 | RSMC_ECOLI |   |    |        | *    | P39406 |
| P39406 | RSMC_ECOLI |   |    |        | *    | P39406 |
| P39406 | RSMC_ECOLI |   |    |        | *    | P39406 |
| P39406 | RSMC_ECOLI |   |    |        | *    | P39406 |
| P39406 | RSMC_ECOLI |   |    |        | *    | P39406 |
| P39406 | RSMC_ECOLI |   |    |        | *    | P39406 |
| P39406 | RSMC_ECOLI |   |    |        | *    | P39406 |
| P39406 | RSMC_ECOLI | 9 | 12 | 75.00% | *    | P39406 |
| P0ADX9 | RSMD_ECOLI |   |    |        | *    | P0ADX9 |
| P0ADX9 | RSMD_ECOLI |   |    |        | *    | P0ADX9 |
| P0ADX9 | RSMD_ECOLI |   |    |        | *    | P0ADX9 |
| P0ADX9 | RSMD_ECOLI |   |    |        | *    | P0ADX9 |
| P0ADX9 | RSMD_ECOLI | 3 | 5  | 60.00% | *    | P0ADX9 |
| P0AGL7 | RSME_ECOLI |   |    |        | *    | P0AGL7 |
| P0AGL7 | RSME_ECOLI |   |    |        | *    | P0AGL7 |
| P0AGL7 | RSME_ECOLI |   |    |        | *    | P0AGL7 |
| P0AGL7 | RSME_ECOLI | 3 | 4  | 75.00% | *    | P0AGL7 |
| P76273 | RSMF_ECOLI |   |    |        | none |        |
| P60390 | RSMH_ECOLI |   |    |        | *    | P60390 |
| P60390 | RSMH_ECOLI |   |    |        | *    | P60390 |
| P60390 | RSMH_ECOLI |   |    |        | *    | P60390 |

|        |            |   |    |         |          |
|--------|------------|---|----|---------|----------|
| P60390 | RSMH_ECOLI | 4 | 4  | 100.00% | * P60390 |
| P67087 | RSMI_ECOLI |   |    |         | * P67087 |
| P67087 | RSMI_ECOLI |   |    |         | * P67087 |
| P67087 | RSMI_ECOLI | 2 | 3  | 66.67%  | * P67087 |
| P52108 | RSTA_ECOLI |   |    |         | * P52108 |
| P52108 | RSTA_ECOLI |   |    |         | * P52108 |
| P52108 | RSTA_ECOLI |   |    |         | * P52108 |
| P52108 | RSTA_ECOLI |   |    |         | * P52108 |
| P52108 | RSTA_ECOLI |   |    |         | * P52108 |
| P52108 | RSTA_ECOLI |   |    |         | * P52108 |
| P52108 | RSTA_ECOLI |   |    |         | * P52108 |
| P52108 | RSTA_ECOLI |   |    |         | * P52108 |
| P52108 | RSTA_ECOLI | 4 | 9  | 44.44%  | * P52108 |
| P0AA43 | RSUA_ECOLI |   |    |         | * P0AA43 |
| P0AA43 | RSUA_ECOLI |   |    |         | * P0AA43 |
| P0AA43 | RSUA_ECOLI |   |    |         | * P0AA43 |
| P0AA43 | RSUA_ECOLI |   |    |         | * P0AA43 |
| P0AA43 | RSUA_ECOLI |   |    |         | * P0AA43 |
| P0AA43 | RSUA_ECOLI |   |    |         | * P0AA43 |
| P0AA43 | RSUA_ECOLI |   |    |         | * P0AA43 |
| P0AA43 | RSUA_ECOLI |   |    |         | * P0AA43 |
| P0AA43 | RSUA_ECOLI |   |    |         | * P0AA43 |
| P0AA43 | RSUA_ECOLI | 8 | 10 | 80.00%  | * P0AA43 |
| P55135 | RUMA_ECOLI |   |    |         | none     |
| P75817 | RUMB_ECOLI |   |    |         | * P75817 |
| P75817 | RUMB_ECOLI |   |    |         | * P75817 |
| P75817 | RUMB_ECOLI |   |    |         | * P75817 |
| P75817 | RUMB_ECOLI |   |    |         | * P75817 |
| P75817 | RUMB_ECOLI |   |    |         | * P75817 |
| P75817 | RUMB_ECOLI |   |    |         | * P75817 |
| P75817 | RUMB_ECOLI | 4 | 7  | 57.14%  | * P75817 |
| P0A809 | RUVA_ECOLI |   |    |         | * P0A809 |
| P0A809 | RUVA_ECOLI |   |    |         | * P0A809 |
| P0A809 | RUVA_ECOLI |   |    |         | * P0A809 |
| P0A809 | RUVA_ECOLI |   |    |         | * P0A809 |
| P0A809 | RUVA_ECOLI | 2 | 5  | 40.00%  | * P0A809 |
| P0AAH4 | SAPD_ECOLI |   |    |         | * P0AAH4 |
| P0AAH4 | SAPD_ECOLI | 1 | 2  | 50.00%  | * P0AAH4 |

|        |            |    |    |        |   |        |
|--------|------------|----|----|--------|---|--------|
| P16095 | SDHL_ECOLI |    |    |        | * | P16095 |
| P16095 | SDHL_ECOLI |    |    |        | * | P16095 |
| P16095 | SDHL_ECOLI | 2  | 3  | 66.67% | * | P16095 |
| P30744 | SDHM_ECOLI | 0  | 1  | 0.00%  | * | P30744 |
| P10408 | SECA_ECOLI |    |    |        | * | P10408 |
| P10408 | SECA_ECOLI |    |    |        | * | P10408 |
| P10408 | SECA_ECOLI |    |    |        | * | P10408 |
| P10408 | SECA_ECOLI |    |    |        | * | P10408 |
| P10408 | SECA_ECOLI |    |    |        | * | P10408 |
| P10408 | SECA_ECOLI |    |    |        | * | P10408 |
| P10408 | SECA_ECOLI |    |    |        | * | P10408 |
| P10408 | SECA_ECOLI |    |    |        | * | P10408 |
| P10408 | SECA_ECOLI |    |    |        | * | P10408 |
| P10408 | SECA_ECOLI |    |    |        | * | P10408 |
| P10408 | SECA_ECOLI |    |    |        | * | P10408 |
| P10408 | SECA_ECOLI |    |    |        | * | P10408 |
| P10408 | SECA_ECOLI |    |    |        | * | P10408 |
| P10408 | SECA_ECOLI |    |    |        | * | P10408 |
| P10408 | SECA_ECOLI |    |    |        | * | P10408 |
| P10408 | SECA_ECOLI |    |    |        | * | P10408 |
| P10408 | SECA_ECOLI |    |    |        | * | P10408 |
| P10408 | SECA_ECOLI |    |    |        | * | P10408 |
| P10408 | SECA_ECOLI |    |    |        | * | P10408 |
| P10408 | SECA_ECOLI |    |    |        | * | P10408 |
| P10408 | SECA_ECOLI |    |    |        | * | P10408 |
| P10408 | SECA_ECOLI |    |    |        | * | P10408 |
| P10408 | SECA_ECOLI |    |    |        | * | P10408 |
| P10408 | SECA_ECOLI |    |    |        | * | P10408 |
| P10408 | SECA_ECOLI |    |    |        | * | P10408 |
| P10408 | SECA_ECOLI |    |    |        | * | P10408 |
| P10408 | SECA_ECOLI |    |    |        | * | P10408 |
| P10408 | SECA_ECOLI |    |    |        | * | P10408 |
| P10408 | SECA_ECOLI | 19 | 27 | 70.37% | * | P10408 |
| P0AG86 | SECB_ECOLI |    |    |        | * | P0AG86 |
| P0AG86 | SECB_ECOLI |    |    |        | * | P0AG86 |
| P0AG86 | SECB_ECOLI |    |    |        | * | P0AG86 |
| P0AG86 | SECB_ECOLI |    |    |        | * | P0AG86 |
| P0AG86 | SECB_ECOLI |    |    |        | * | P0AG86 |
| P0AG86 | SECB_ECOLI |    |    |        | * | P0AG86 |
| P0AG86 | SECB_ECOLI |    |    |        | * | P0AG86 |
| P0AG86 | SECB_ECOLI |    |    |        | * | P0AG86 |
| P0AG86 | SECB_ECOLI |    |    |        | * | P0AG86 |
| P0AG86 | SECB_ECOLI | 5  | 9  | 55.56% | * | P0AG86 |











|        |             |    |    |         |          |
|--------|-------------|----|----|---------|----------|
| P0AG24 | SPOT_ECOLI  |    |    |         | * P0AG24 |
| P0AG24 | SPOT_ECOLI  |    |    |         | * P0AG24 |
| P0AG24 | SPOT_ECOLI  |    |    |         | * P0AG24 |
| P0AG24 | SPOT_ECOLI  |    |    |         | * P0AG24 |
| P0AG24 | SPOT_ECOLI  |    |    |         | * P0AG24 |
| P0AG24 | SPOT_ECOLI  |    |    |         | * P0AG24 |
| P0AG24 | SPOT_ECOLI  |    |    |         | * P0AG24 |
| P0AG24 | SPOT_ECOLI  |    |    |         | * P0AG24 |
| P0AG24 | SPOT_ECOLI  |    |    |         | * P0AG24 |
| P0AG24 | SPOT_ECOLI  |    |    |         | * P0AG24 |
| P0AG24 | SPOT_ECOLI  |    |    |         | * P0AG24 |
| P0AG24 | SPOT_ECOLI  | 43 | 47 | 91.49%  | * P0AG24 |
| P68191 | SRA_ECOLI   |    |    |         | none     |
| P21507 | SRMB_ECOLI  |    |    |         | * P21507 |
| P21507 | SRMB_ECOLI  |    |    |         | * P21507 |
| P21507 | SRMB_ECOLI  |    |    |         | * P21507 |
| P21507 | SRMB_ECOLI  |    |    |         | * P21507 |
| P21507 | SRMB_ECOLI  |    |    |         | * P21507 |
| P21507 | SRMB_ECOLI  |    |    |         | * P21507 |
| P21507 | SRMB_ECOLI  |    |    |         | * P21507 |
| P21507 | SRMB_ECOLI  |    |    |         | * P21507 |
| P21507 | SRMB_ECOLI  |    |    |         | * P21507 |
| P21507 | SRMB_ECOLI  |    |    |         | * P21507 |
| P21507 | SRMB_ECOLI  |    |    |         | * P21507 |
| P21507 | SRMB_ECOLI  |    |    |         | * P21507 |
| P21507 | SRMB_ECOLI  |    |    |         | * P21507 |
| P21507 | SRMB_ECOLI  |    |    |         | * P21507 |
| P21507 | SRMB_ECOLI  |    |    |         | * P21507 |
| P21507 | SRMB_ECOLI  |    |    |         | * P21507 |
| P21507 | SRMB_ECOLI  |    |    |         | * P21507 |
| P21507 | SRMB_ECOLI  | 18 | 19 | 94.74%  | * P21507 |
| P0AGD7 | SRP54_ECOLI |    |    |         | * P0AGD7 |
| P0AGD7 | SRP54_ECOLI |    |    |         | * P0AGD7 |
| P0AGD7 | SRP54_ECOLI |    |    |         | * P0AGD7 |
| P0AGD7 | SRP54_ECOLI | 4  | 4  | 100.00% | * P0AGD7 |
| P0AGE0 | SSB_ECOLI   |    |    |         | * P0AGE0 |
| P0AGE0 | SSB_ECOLI   | 2  | 4  | 50.00%  | * P0AGE0 |
| P0ACA3 | SSPA_ECOLI  |    |    |         | * P0ACA3 |
| P0ACA3 | SSPA_ECOLI  |    |    |         | * P0ACA3 |
| P0ACA3 | SSPA_ECOLI  |    |    |         | * P0ACA3 |

|        |            |    |    |        |          |
|--------|------------|----|----|--------|----------|
| P0ACA3 | SSPA_ECOLI |    |    |        | * P0ACA3 |
| P0ACA3 | SSPA_ECOLI |    |    |        | * P0ACA3 |
| P0ACA3 | SSPA_ECOLI |    |    |        | * P0ACA3 |
| P0ACA3 | SSPA_ECOLI |    |    |        | * P0ACA3 |
| P0ACA3 | SSPA_ECOLI |    |    |        | * P0ACA3 |
| P0ACA3 | SSPA_ECOLI |    |    |        | * P0ACA3 |
| P0ACA3 | SSPA_ECOLI |    |    |        | * P0ACA3 |
| P0ACA3 | SSPA_ECOLI |    |    |        | * P0ACA3 |
| P0ACA3 | SSPA_ECOLI |    |    |        | * P0ACA3 |
| P0ACA3 | SSPA_ECOLI | 9  | 13 | 69.23% | * P0ACA3 |
| P0A832 | SSRP_ECOLI |    |    |        | * P0A832 |
| P0A832 | SSRP_ECOLI |    |    |        | * P0A832 |
| P0A832 | SSRP_ECOLI |    |    |        | * P0A832 |
| P0A832 | SSRP_ECOLI |    |    |        | * P0A832 |
| P0A832 | SSRP_ECOLI |    |    |        | * P0A832 |
| P0A832 | SSRP_ECOLI |    |    |        | * P0A832 |
| P0A832 | SSRP_ECOLI |    |    |        | * P0A832 |
| P0A832 | SSRP_ECOLI |    |    |        | * P0A832 |
| P0A832 | SSRP_ECOLI |    |    |        | * P0A832 |
| P0A832 | SSRP_ECOLI |    |    |        | * P0A832 |
| P0A832 | SSRP_ECOLI |    |    |        | * P0A832 |
| P0A832 | SSRP_ECOLI |    |    |        | * P0A832 |
| P0A832 | SSRP_ECOLI |    |    |        | * P0A832 |
| P0A832 | SSRP_ECOLI |    |    |        | * P0A832 |
| P0A832 | SSRP_ECOLI |    |    |        | * P0A832 |
| P0A832 | SSRP_ECOLI |    |    |        | * P0A832 |
| P0A832 | SSRP_ECOLI |    |    |        | * P0A832 |
| P0A832 | SSRP_ECOLI |    |    |        | * P0A832 |
| P0A832 | SSRP_ECOLI |    |    |        | * P0A832 |
| P0A832 | SSRP_ECOLI |    |    |        | * P0A832 |
| P0A832 | SSRP_ECOLI |    |    |        | * P0A832 |
| P0A832 | SSRP_ECOLI |    |    |        | * P0A832 |
| P0A832 | SSRP_ECOLI |    |    |        | * P0A832 |
| P0A832 | SSRP_ECOLI |    |    |        | * P0A832 |
| P0A832 | SSRP_ECOLI |    |    |        | * P0A832 |
| P0A832 | SSRP_ECOLI |    |    |        | * P0A832 |
| P0A832 | SSRP_ECOLI |    |    |        | * P0A832 |
| P0A832 | SSRP_ECOLI | 28 | 32 | 87.50% | * P0A832 |
| P76072 | STFR_ECOLI |    |    |        | * P76072 |

|        |            |   |   |        |   |        |
|--------|------------|---|---|--------|---|--------|
| P76072 | STFR_ECOLI |   |   |        | * | P76072 |
| P76072 | STFR_ECOLI |   |   |        | * | P76072 |
| P76072 | STFR_ECOLI |   |   |        | * | P76072 |
| P76072 | STFR_ECOLI |   |   |        | * | P76072 |
| P76072 | STFR_ECOLI |   |   |        | * | P76072 |
| P76072 | STFR_ECOLI | 2 | 7 | 28.57% | * | P76072 |
| P0ACG1 | STPA_ECOLI |   |   |        | * | P0ACG1 |
| P0ACG1 | STPA_ECOLI |   |   |        | * | P0ACG1 |
| P0ACG1 | STPA_ECOLI |   |   |        | * | P0ACG1 |
| P0ACG1 | STPA_ECOLI |   |   |        | * | P0ACG1 |
| P0ACG1 | STPA_ECOLI |   |   |        | * | P0ACG1 |
| P0ACG1 | STPA_ECOLI | 5 | 6 | 83.33% | * | P0ACG1 |
| P0A836 | SUCC_ECOLI |   |   |        | * | P0A836 |
| P0A836 | SUCC_ECOLI |   |   |        | * | P0A836 |
| P0A836 | SUCC_ECOLI |   |   |        | * | P0A836 |
| P0A836 | SUCC_ECOLI |   |   |        | * | P0A836 |
| P0A836 | SUCC_ECOLI |   |   |        | * | P0A836 |
| P0A836 | SUCC_ECOLI |   |   |        | * | P0A836 |
| P0A836 | SUCC_ECOLI |   |   |        | * | P0A836 |
| P0A836 | SUCC_ECOLI |   |   |        | * | P0A836 |
| P0A836 | SUCC_ECOLI | 8 | 9 | 88.89% | * | P0A836 |
| P0AGE9 | SUCD_ECOLI |   |   |        | * | P0AGE9 |
| P0AGE9 | SUCD_ECOLI |   |   |        | * | P0AGE9 |
| P0AGE9 | SUCD_ECOLI | 2 | 3 | 66.67% | * | P0AGE9 |
| P77499 | SUFC_ECOLI |   |   |        | * | P77499 |
| P77499 | SUFC_ECOLI |   |   |        | * | P77499 |
| P77499 | SUFC_ECOLI |   |   |        | * | P77499 |
| P77499 | SUFC_ECOLI |   |   |        | * | P77499 |
| P77499 | SUFC_ECOLI |   |   |        | * | P77499 |
| P77499 | SUFC_ECOLI |   |   |        | * | P77499 |
| P77499 | SUFC_ECOLI |   |   |        | * | P77499 |
| P77499 | SUFC_ECOLI | 3 | 8 | 37.50% | * | P77499 |
| P77444 | SUFS_ECOLI |   |   |        | * | P77444 |
| P77444 | SUFS_ECOLI |   |   |        | * | P77444 |
| P77444 | SUFS_ECOLI |   |   |        | * | P77444 |
| P77444 | SUFS_ECOLI |   |   |        | * | P77444 |
| P77444 | SUFS_ECOLI |   |   |        | * | P77444 |
| P77444 | SUFS_ECOLI |   |   |        | * | P77444 |
| P77444 | SUFS_ECOLI | 3 | 7 | 42.86% | * | P77444 |

|        |            |   |   |         |          |
|--------|------------|---|---|---------|----------|
| P0ABZ6 | SURA_ECOLI |   |   |         | * P0ABZ6 |
| P0ABZ6 | SURA_ECOLI |   |   |         | * P0ABZ6 |
| P0ABZ6 | SURA_ECOLI |   |   |         | * P0ABZ6 |
| P0ABZ6 | SURA_ECOLI |   |   |         | * P0ABZ6 |
| P0ABZ6 | SURA_ECOLI |   |   |         | * P0ABZ6 |
| P0ABZ6 | SURA_ECOLI |   |   |         | * P0ABZ6 |
| P0ABZ6 | SURA_ECOLI |   |   |         | * P0ABZ6 |
| P0ABZ6 | SURA_ECOLI | 6 | 8 | 75.00%  | * P0ABZ6 |
|        |            |   |   |         |          |
| P00957 | SYA_ECOLI  |   |   |         | * P00957 |
| P00957 | SYA_ECOLI  |   |   |         | * P00957 |
| P00957 | SYA_ECOLI  |   |   |         | * P00957 |
| P00957 | SYA_ECOLI  |   |   |         | * P00957 |
| P00957 | SYA_ECOLI  |   |   |         | * P00957 |
| P00957 | SYA_ECOLI  |   |   |         | * P00957 |
| P00957 | SYA_ECOLI  | 5 | 7 | 71.43%  | * P00957 |
|        |            |   |   |         |          |
| P21888 | SYC_ECOLI  |   |   |         | * P21888 |
| P21888 | SYC_ECOLI  | 2 | 2 | 100.00% | * P21888 |
|        |            |   |   |         |          |
| P21889 | SYD_ECOLI  |   |   |         | * P21889 |
| P21889 | SYD_ECOLI  |   |   |         | * P21889 |
| P21889 | SYD_ECOLI  |   |   |         | * P21889 |
| P21889 | SYD_ECOLI  |   |   |         | * P21889 |
| P21889 | SYD_ECOLI  |   |   |         | * P21889 |
| P21889 | SYD_ECOLI  |   |   |         | * P21889 |
| P21889 | SYD_ECOLI  | 6 | 8 | 75.00%  | * P21889 |
|        |            |   |   |         |          |
| P04805 | SYE_ECOLI  |   |   |         | * P04805 |
| P04805 | SYE_ECOLI  |   |   |         | * P04805 |
| P04805 | SYE_ECOLI  |   |   |         | * P04805 |
| P04805 | SYE_ECOLI  |   |   |         | * P04805 |
| P04805 | SYE_ECOLI  |   |   |         | * P04805 |
| P04805 | SYE_ECOLI  | 3 | 6 | 50.00%  | * P04805 |
|        |            |   |   |         |          |
| P07395 | SYFB_ECOLI |   |   |         | * P07395 |
| P07395 | SYFB_ECOLI |   |   |         | * P07395 |
| P07395 | SYFB_ECOLI |   |   |         | * P07395 |
| P07395 | SYFB_ECOLI |   |   |         | * P07395 |
| P07395 | SYFB_ECOLI |   |   |         | * P07395 |
| P07395 | SYFB_ECOLI |   |   |         | * P07395 |
| P07395 | SYFB_ECOLI |   |   |         | * P07395 |
| P07395 | SYFB_ECOLI | 4 | 8 | 50.00%  | * P07395 |

|        |            |    |    |        |   |        |
|--------|------------|----|----|--------|---|--------|
| P00960 | SYGA_ECOLI |    |    |        | * | P00960 |
| P00960 | SYGA_ECOLI |    |    |        | * | P00960 |
| P00960 | SYGA_ECOLI |    |    |        | * | P00960 |
| P00960 | SYGA_ECOLI |    |    |        | * | P00960 |
| P00960 | SYGA_ECOLI |    |    |        | * | P00960 |
| P00960 | SYGA_ECOLI |    |    |        | * | P00960 |
| P00960 | SYGA_ECOLI |    |    |        | * | P00960 |
| P00960 | SYGA_ECOLI |    |    |        | * | P00960 |
| P00960 | SYGA_ECOLI |    |    |        | * | P00960 |
| P00960 | SYGA_ECOLI |    |    |        | * | P00960 |
| P00960 | SYGA_ECOLI |    |    |        | * | P00960 |
| P00960 | SYGA_ECOLI |    |    |        | * | P00960 |
| P00960 | SYGA_ECOLI |    |    |        | * | P00960 |
| P00960 | SYGA_ECOLI |    |    |        | * | P00960 |
| P00960 | SYGA_ECOLI |    |    |        | * | P00960 |
| P00960 | SYGA_ECOLI |    |    |        | * | P00960 |
| P00960 | SYGA_ECOLI |    |    |        | * | P00960 |
| P00960 | SYGA_ECOLI |    |    |        | * | P00960 |
| P00960 | SYGA_ECOLI | 16 | 18 | 88.89% | * | P00960 |
| P00961 | SYGB_ECOLI |    |    |        | * | P00961 |
| P00961 | SYGB_ECOLI |    |    |        | * | P00961 |
| P00961 | SYGB_ECOLI | 1  | 3  | 33.33% | * | P00961 |
| P00956 | SYI_ECOLI  |    |    |        | * | P00956 |
| P00956 | SYI_ECOLI  |    |    |        | * | P00956 |
| P00956 | SYI_ECOLI  |    |    |        | * | P00956 |
| P00956 | SYI_ECOLI  |    |    |        | * | P00956 |
| P00956 | SYI_ECOLI  |    |    |        | * | P00956 |
| P00956 | SYI_ECOLI  |    |    |        | * | P00956 |
| P00956 | SYI_ECOLI  |    |    |        | * | P00956 |
| P00956 | SYI_ECOLI  |    |    |        | * | P00956 |
| P00956 | SYI_ECOLI  | 6  | 9  | 66.67% | * | P00956 |
| POA8N3 | SYK1_ECOLI |    |    |        | * | POA8N3 |
| POA8N3 | SYK1_ECOLI |    |    |        | * | POA8N3 |
| POA8N3 | SYK1_ECOLI |    |    |        | * | POA8N3 |
| POA8N3 | SYK1_ECOLI |    |    |        | * | POA8N3 |
| POA8N3 | SYK1_ECOLI |    |    |        | * | POA8N3 |
| POA8N3 | SYK1_ECOLI |    |    |        | * | POA8N3 |
| POA8N3 | SYK1_ECOLI |    |    |        | * | POA8N3 |
| POA8N3 | SYK1_ECOLI |    |    |        | * | POA8N3 |
| POA8N3 | SYK1_ECOLI |    |    |        | * | POA8N3 |
| POA8N3 | SYK1_ECOLI |    |    |        | * | POA8N3 |
| POA8N3 | SYK1_ECOLI |    |    |        | * | POA8N3 |
| POA8N3 | SYK1_ECOLI |    |    |        | * | POA8N3 |
| POA8N3 | SYK1_ECOLI | 2  | 12 | 16.67% | * | POA8N3 |







|        |            |    |    |         |          |
|--------|------------|----|----|---------|----------|
| POA8M3 | SYT_ECOLI  |    |    |         | * P0A8M3 |
| POA8M3 | SYT_ECOLI  |    |    |         | * P0A8M3 |
| POA8M3 | SYT_ECOLI  |    |    |         | * P0A8M3 |
| POA8M3 | SYT_ECOLI  |    |    |         | * P0A8M3 |
| POA8M3 | SYT_ECOLI  |    |    |         | * P0A8M3 |
| POA8M3 | SYT_ECOLI  |    |    |         | * P0A8M3 |
| POA8M3 | SYT_ECOLI  |    |    |         | * P0A8M3 |
| POA8M3 | SYT_ECOLI  |    |    |         | * P0A8M3 |
| POA8M3 | SYT_ECOLI  |    |    |         | * P0A8M3 |
| POA8M3 | SYT_ECOLI  |    |    |         | * P0A8M3 |
| POA8M3 | SYT_ECOLI  |    |    |         | * P0A8M3 |
| POA8M3 | SYT_ECOLI  |    |    |         | * P0A8M3 |
| POA8M3 | SYT_ECOLI  | 20 | 27 | 74.07%  | * P0A8M3 |
| P07118 | SYV_ECOLI  | 1  | 1  | 100.00% | * P07118 |
| P00954 | SYW_ECOLI  |    |    |         | * P00954 |
| P00954 | SYW_ECOLI  |    |    |         | * P00954 |
| P00954 | SYW_ECOLI  |    |    |         | * P00954 |
| P00954 | SYW_ECOLI  |    |    |         | * P00954 |
| P00954 | SYW_ECOLI  |    |    |         | * P00954 |
| P00954 | SYW_ECOLI  |    |    |         | * P00954 |
| P00954 | SYW_ECOLI  |    |    |         | * P00954 |
| P00954 | SYW_ECOLI  |    |    |         | * P00954 |
| P00954 | SYW_ECOLI  |    |    |         | * P00954 |
| P00954 | SYW_ECOLI  |    |    |         | * P00954 |
| P00954 | SYW_ECOLI  | 10 | 12 | 83.33%  | * P00954 |
| P0AGJ9 | SYY_ECOLI  |    |    |         | * P0AGJ9 |
| P0AGJ9 | SYY_ECOLI  |    |    |         | * P0AGJ9 |
| P0AGJ9 | SYY_ECOLI  |    |    |         | * P0AGJ9 |
| P0AGJ9 | SYY_ECOLI  |    |    |         | * P0AGJ9 |
| P0AGJ9 | SYY_ECOLI  |    |    |         | * P0AGJ9 |
| P0AGJ9 | SYY_ECOLI  |    |    |         | * P0AGJ9 |
| P0AGJ9 | SYY_ECOLI  |    |    |         | * P0AGJ9 |
| P0AGJ9 | SYY_ECOLI  | 6  | 8  | 75.00%  | * P0AGJ9 |
| P25239 | T257_ECOLX |    |    |         | none     |
| P0A867 | TALA_ECOLI |    |    |         | * P0A867 |
| P0A867 | TALA_ECOLI | 1  | 2  | 50.00%  | * P0A867 |
| P0A870 | TALB_ECOLI | 1  | 1  | 100.00% | * P0A870 |

















|                    |                          |    |     |         |          |
|--------------------|--------------------------|----|-----|---------|----------|
| P0A850             | TIG_ECOLI                | 79 | 119 | 66.39%  | * P0A850 |
| P27302             | TKT1_ECOLI               |    |     |         | none     |
| Q46731<br>Q46731-2 | TN5P_ECOLX<br>TN5P_ECOLX |    |     |         | none     |
| P0A853             | TNAA_ECOLI               | 1  | 1   | 100.00% | * P0A853 |
| P13694             | TNP7_ECOLX               |    |     |         | none     |
| P0A855             | TOLB_ECOLI               |    |     |         | none     |
| P06612             | TOP1_ECOLI               |    |     |         | * P06612 |
| P06612             | TOP1_ECOLI               |    |     |         | * P06612 |
| P06612             | TOP1_ECOLI               |    |     |         | * P06612 |
| P06612             | TOP1_ECOLI               |    |     |         | * P06612 |
| P06612             | TOP1_ECOLI               |    |     |         | * P06612 |
| P06612             | TOP1_ECOLI               |    |     |         | * P06612 |
| P06612             | TOP1_ECOLI               |    |     |         | * P06612 |
| P06612             | TOP1_ECOLI               |    |     |         | * P06612 |
| P06612             | TOP1_ECOLI               |    |     |         | * P06612 |
| P06612             | TOP1_ECOLI               |    |     |         | * P06612 |
| P06612             | TOP1_ECOLI               |    |     |         | * P06612 |
| P06612             | TOP1_ECOLI               |    |     |         | * P06612 |
| P06612             | TOP1_ECOLI               |    |     |         | * P06612 |
| P06612             | TOP1_ECOLI               |    |     |         | * P06612 |
| P06612             | TOP1_ECOLI               |    |     |         | * P06612 |
| P06612             | TOP1_ECOLI               |    |     |         | * P06612 |
| P06612             | TOP1_ECOLI               |    |     |         | * P06612 |
| P06612             | TOP1_ECOLI               |    |     |         | * P06612 |
| P06612             | TOP1_ECOLI               |    |     |         | * P06612 |
| P06612             | TOP1_ECOLI               |    |     |         | * P06612 |
| P06612             | TOP1_ECOLI               |    |     |         | * P06612 |
| P06612             | TOP1_ECOLI               |    |     |         | * P06612 |
| P06612             | TOP1_ECOLI               |    |     |         | * P06612 |
| P06612             | TOP1_ECOLI               |    |     |         | * P06612 |
| P06612             | TOP1_ECOLI               |    |     |         | * P06612 |
| P06612             | TOP1_ECOLI               |    |     |         | * P06612 |
| P06612             | TOP1_ECOLI               |    |     |         | * P06612 |
| P06612             | TOP1_ECOLI               |    |     |         | * P06612 |
| P06612             | TOP1_ECOLI               |    |     |         | * P06612 |
| P06612             | TOP1_ECOLI               |    |     |         | * P06612 |
| P06612             | TOP1_ECOLI               |    |     |         | * P06612 |
| P06612             | TOP1_ECOLI               |    |     |         | * P06612 |
| P06612             | TOP1_ECOLI               |    |     |         | * P06612 |
| P06612             | TOP1_ECOLI               |    |     |         | * P06612 |
| P06612             | TOP1_ECOLI               | 19 | 29  | 65.52%  | * P06612 |
| P33226             | TORC_ECOLI               |    |     |         | none     |



|        |            |    |    |         |          |
|--------|------------|----|----|---------|----------|
| POA815 | TRMB_ECOLI |    |    |         | * POA815 |
| POA815 | TRMB_ECOLI |    |    |         | * POA815 |
| POA815 | TRMB_ECOLI |    |    |         | * POA815 |
| POA815 | TRMB_ECOLI |    |    |         | * POA815 |
| POA815 | TRMB_ECOLI |    |    |         | * POA815 |
| POA815 | TRMB_ECOLI |    |    |         | * POA815 |
| POA815 | TRMB_ECOLI |    |    |         | * POA815 |
| POA815 | TRMB_ECOLI |    |    |         | * POA815 |
| POA815 | TRMB_ECOLI |    |    |         | * POA815 |
| POA815 | TRMB_ECOLI |    |    |         | * POA815 |
| POA815 | TRMB_ECOLI |    |    |         | * POA815 |
| POA815 | TRMB_ECOLI |    |    |         | * POA815 |
| POA815 | TRMB_ECOLI |    |    |         | * POA815 |
| POA815 | TRMB_ECOLI |    |    |         | * POA815 |
| POA815 | TRMB_ECOLI |    |    |         | * POA815 |
| POA815 | TRMB_ECOLI |    |    |         | * POA815 |
| POA815 | TRMB_ECOLI |    |    |         | * POA815 |
| POA815 | TRMB_ECOLI |    |    |         | * POA815 |
| POA815 | TRMB_ECOLI |    |    |         | * POA815 |
| POA815 | TRMB_ECOLI |    |    |         | * POA815 |
| POA815 | TRMB_ECOLI |    |    |         | * POA815 |
| POA815 | TRMB_ECOLI |    |    |         | * POA815 |
| POA815 | TRMB_ECOLI |    |    |         | * POA815 |
| POA815 | TRMB_ECOLI |    |    |         | * POA815 |
| POA815 | TRMB_ECOLI |    |    |         | * POA815 |
| POA815 | TRMB_ECOLI | 37 | 45 | 82.22%  | * POA815 |
| POAGJ2 | TRMH_ECOLI |    |    |         | * POAGJ2 |
| POAGJ2 | TRMH_ECOLI |    |    |         | * POAGJ2 |
| POAGJ2 | TRMH_ECOLI | 2  | 3  | 66.67%  | * POAGJ2 |
| POAE01 | TRMJ_ECOLI |    |    |         | none     |
| P60340 | TRUB_ECOLI |    |    |         | * P60340 |
| P60340 | TRUB_ECOLI |    |    |         | * P60340 |
| P60340 | TRUB_ECOLI |    |    |         | * P60340 |
| P60340 | TRUB_ECOLI |    |    |         | * P60340 |
| P60340 | TRUB_ECOLI | 4  | 5  | 80.00%  | * P60340 |
| POA9P4 | TRXB_ECOLI | 1  | 1  | 100.00% | * POA9P4 |



|        |            |    |    |        |          |
|--------|------------|----|----|--------|----------|
| P0A9W0 | ULAR_ECOLI |    |    |        | * P0A9W0 |
| P0A9W0 | ULAR_ECOLI |    |    |        | * P0A9W0 |
| P0A9W0 | ULAR_ECOLI |    |    |        | * P0A9W0 |
| P0A9W0 | ULAR_ECOLI |    |    |        | * P0A9W0 |
| P0A9W0 | ULAR_ECOLI |    |    |        | * P0A9W0 |
| P0A9W0 | ULAR_ECOLI |    |    |        | * P0A9W0 |
| P0A9W0 | ULAR_ECOLI |    |    |        | * P0A9W0 |
| P0A9W0 | ULAR_ECOLI |    |    |        | * P0A9W0 |
| P0A9W0 | ULAR_ECOLI |    |    |        | * P0A9W0 |
| P0A9W0 | ULAR_ECOLI |    |    |        | * P0A9W0 |
| P0A9W0 | ULAR_ECOLI |    |    |        | * P0A9W0 |
| P0A9W0 | ULAR_ECOLI |    |    |        | * P0A9W0 |
| P0A9W0 | ULAR_ECOLI |    |    |        | * P0A9W0 |
| P0A9W0 | ULAR_ECOLI |    |    |        | * P0A9W0 |
| P0A9W0 | ULAR_ECOLI |    |    |        | * P0A9W0 |
| P0A9W0 | ULAR_ECOLI |    |    |        | * P0A9W0 |
| P0A9W0 | ULAR_ECOLI |    |    |        | * P0A9W0 |
| P0A9W0 | ULAR_ECOLI |    |    |        | * P0A9W0 |
| P0A9W0 | ULAR_ECOLI |    |    |        | * P0A9W0 |
| P0A9W0 | ULAR_ECOLI |    |    |        | * P0A9W0 |
| P0A9W0 | ULAR_ECOLI |    |    |        | * P0A9W0 |
| P0A9W0 | ULAR_ECOLI |    |    |        | * P0A9W0 |
| P0A9W0 | ULAR_ECOLI |    |    |        | * P0A9W0 |
| P0A9W0 | ULAR_ECOLI |    |    |        | * P0A9W0 |
| P0A9W0 | ULAR_ECOLI |    |    |        | * P0A9W0 |
| P0A9W0 | ULAR_ECOLI |    |    |        | * P0A9W0 |
| P0A9W0 | ULAR_ECOLI |    |    |        | * P0A9W0 |
| P0A9W0 | ULAR_ECOLI |    |    |        | * P0A9W0 |
| P0A9W0 | ULAR_ECOLI |    |    |        | * P0A9W0 |
| P0A9W0 | ULAR_ECOLI |    |    |        | * P0A9W0 |
| P0A9W0 | ULAR_ECOLI |    |    |        | * P0A9W0 |
| P0A9W0 | ULAR_ECOLI |    |    |        | * P0A9W0 |
| P0A9W0 | ULAR_ECOLI |    |    |        | * P0A9W0 |
| P0A9W0 | ULAR_ECOLI | 40 | 45 | 88.89% | * P0A9W0 |
| P0A8F0 | UPP_ECOLI  |    |    |        | * P0A8F0 |
| P0A8F0 | UPP_ECOLI  |    |    |        | * P0A8F0 |
| P0A8F0 | UPP_ECOLI  |    |    |        | * P0A8F0 |
| P0A8F0 | UPP_ECOLI  | 3  | 4  | 75.00% | * P0A8F0 |
| P32326 | URER_ECOLX |    |    |        | none     |
| P08390 | USG_ECOLI  |    |    |        | * P08390 |
| P08390 | USG_ECOLI  |    |    |        | * P08390 |
| P08390 | USG_ECOLI  |    |    |        | * P08390 |
| P08390 | USG_ECOLI  |    |    |        | * P08390 |
| P08390 | USG_ECOLI  |    |    |        | * P08390 |

|        |            |    |    |        |          |
|--------|------------|----|----|--------|----------|
| P08390 | USG_ECOLI  |    |    |        | * P08390 |
| P08390 | USG_ECOLI  |    |    |        | * P08390 |
| P08390 | USG_ECOLI  |    |    |        | * P08390 |
| P08390 | USG_ECOLI  |    |    |        | * P08390 |
| P08390 | USG_ECOLI  |    |    |        | * P08390 |
| P08390 | USG_ECOLI  |    |    |        | * P08390 |
| P08390 | USG_ECOLI  |    |    |        | * P08390 |
| P08390 | USG_ECOLI  |    |    |        | * P08390 |
| P08390 | USG_ECOLI  |    |    |        | * P08390 |
| P08390 | USG_ECOLI  |    |    |        | * P08390 |
| P08390 | USG_ECOLI  |    |    |        | * P08390 |
| P08390 | USG_ECOLI  |    |    |        | * P08390 |
| P08390 | USG_ECOLI  |    |    |        | * P08390 |
| P08390 | USG_ECOLI  | 13 | 19 | 68.42% | * P08390 |
| P0AED0 | USPA_ECOLI |    |    |        | * P0AED0 |
| P0AED0 | USPA_ECOLI |    |    |        | * P0AED0 |
| P0AED0 | USPA_ECOLI | 1  | 3  | 33.33% | * P0AED0 |
| P0AAB8 | USPD_ECOLI |    |    |        | none     |
| P0AAC0 | USPE_ECOLI |    |    |        | none     |
| P37903 | USPF_ECOLI |    |    |        | * P37903 |
| P37903 | USPF_ECOLI |    |    |        | * P37903 |
| P37903 | USPF_ECOLI |    |    |        | * P37903 |
| P37903 | USPF_ECOLI |    |    |        | * P37903 |
| P37903 | USPF_ECOLI |    |    |        | * P37903 |
| P37903 | USPF_ECOLI |    |    |        | * P37903 |
| P37903 | USPF_ECOLI |    |    |        | * P37903 |
| P37903 | USPF_ECOLI |    |    |        | * P37903 |
| P37903 | USPF_ECOLI |    |    |        | * P37903 |
| P37903 | USPF_ECOLI |    |    |        | * P37903 |
| P37903 | USPF_ECOLI |    |    |        | * P37903 |
| P37903 | USPF_ECOLI |    |    |        | * P37903 |
| P37903 | USPF_ECOLI |    |    |        | * P37903 |
| P37903 | USPF_ECOLI |    |    |        | * P37903 |
| P37903 | USPF_ECOLI |    |    |        | * P37903 |
| P37903 | USPF_ECOLI |    |    |        | * P37903 |
| P37903 | USPF_ECOLI |    |    |        | * P37903 |
| P37903 | USPF_ECOLI |    |    |        | * P37903 |
| P37903 | USPF_ECOLI |    |    |        | * P37903 |
| P37903 | USPF_ECOLI | 11 | 19 | 57.89% | * P37903 |
| P39177 | USPG_ECOLI |    |    |        | * P39177 |
| P39177 | USPG_ECOLI |    |    |        | * P39177 |







|        |            |    |    |         |          |
|--------|------------|----|----|---------|----------|
| P0A8G0 | UVRC_ECOLI | 47 | 52 | 90.38%  | * P0A8G0 |
| P39160 | UXUB_ECOLI |    |    |         | * P39160 |
| P39160 | UXUB_ECOLI | 1  | 2  | 50.00%  | * P39160 |
| P25535 | VISC_ECOLI |    |    |         | none     |
| P0ACD2 | WCAF_ECOLI |    |    |         | none     |
| P27828 | WECB_ECOLI |    |    |         | none     |
| P27829 | WECC_ECOLI |    |    |         | none     |
| P0A8G6 | WRBA_ECOLI |    |    |         | * P0A8G6 |
| P0A8G6 | WRBA_ECOLI | 1  | 2  | 50.00%  | * P0A8G6 |
| P0A8P8 | XERD_ECOLI |    |    |         | * P0A8P8 |
| P0A8P8 | XERD_ECOLI |    |    |         | * P0A8P8 |
| P0A8P8 | XERD_ECOLI |    |    |         | * P0A8P8 |
| P0A8P8 | XERD_ECOLI |    |    |         | * P0A8P8 |
| P0A8P8 | XERD_ECOLI |    |    |         | * P0A8P8 |
| P0A8P8 | XERD_ECOLI | 5  | 6  | 83.33%  | * P0A8P8 |
| P0A9M5 | XGPT_ECOLI | 0  | 1  | 0.00%   | * P0A9M5 |
| P36879 | YADG_ECOLI |    |    |         | * P36879 |
| P36879 | YADG_ECOLI | 2  | 2  | 100.00% | * P36879 |
| P62768 | YAEH_ECOLI |    |    |         | none     |
| P0A940 | YAET_ECOLI | 0  | 1  | 0.00%   | * P0A940 |
| P30864 | YAFC_ECOLI | 1  | 1  | 100.00% | * P30864 |
| P77300 | YAGI_ECOLI |    |    |         | * P77300 |
| P77300 | YAGI_ECOLI |    |    |         | * P77300 |
| P77300 | YAGI_ECOLI |    |    |         | * P77300 |
| P77300 | YAGI_ECOLI |    |    |         | * P77300 |
| P77300 | YAGI_ECOLI | 2  | 5  | 40.00%  | * P77300 |
| P77607 | YAGL_ECOLI |    |    |         | * P77607 |
| P77607 | YAGL_ECOLI |    |    |         | * P77607 |
| P77607 | YAGL_ECOLI | 3  | 3  | 100.00% | * P77607 |
| P77802 | YAGX_ECOLI |    |    |         | none     |



|        |            |   |    |        |   |        |
|--------|------------|---|----|--------|---|--------|
| P77634 | YBCM_ECOLI |   |    |        | * | P77634 |
| P77634 | YBCM_ECOLI | 6 | 11 | 54.55% | * | P77634 |
| P77460 | YBCY_ECOLI |   |    |        |   | none   |
| P0A8J4 | YBED_ECOLI |   |    |        | * | P0A8J4 |
| P0A8J4 | YBED_ECOLI |   |    |        | * | P0A8J4 |
| P0A8J4 | YBED_ECOLI |   |    |        | * | P0A8J4 |
| P0A8J4 | YBED_ECOLI |   |    |        | * | P0A8J4 |
| P0A8J4 | YBED_ECOLI |   |    |        | * | P0A8J4 |
| P0A8J4 | YBED_ECOLI |   |    |        | * | P0A8J4 |
| P0A8J4 | YBED_ECOLI | 6 | 7  | 85.71% | * | P0A8J4 |
| P0AAU7 | YBFE_ECOLI |   |    |        |   | none   |
| P0A8Z3 | YBGC_ECOLI |   |    |        | * | P0A8Z3 |
| P0A8Z3 | YBGC_ECOLI |   |    |        | * | P0A8Z3 |
| P0A8Z3 | YBGC_ECOLI |   |    |        | * | P0A8Z3 |
| P0A8Z3 | YBGC_ECOLI |   |    |        | * | P0A8Z3 |
| P0A8Z3 | YBGC_ECOLI |   |    |        | * | P0A8Z3 |
| P0A8Z3 | YBGC_ECOLI |   |    |        | * | P0A8Z3 |
| P0A8Z3 | YBGC_ECOLI |   |    |        | * | P0A8Z3 |
| P0A8Z3 | YBGC_ECOLI |   |    |        | * | P0A8Z3 |
| P0A8Z3 | YBGC_ECOLI |   |    |        | * | P0A8Z3 |
| P0A8Z3 | YBGC_ECOLI |   |    |        | * | P0A8Z3 |
| P0A8Z3 | YBGC_ECOLI |   |    |        | * | P0A8Z3 |
| P0A8Z3 | YBGC_ECOLI |   |    |        | * | P0A8Z3 |
| P0A8Z3 | YBGC_ECOLI |   |    |        | * | P0A8Z3 |
| P0A8Z3 | YBGC_ECOLI |   |    |        | * | P0A8Z3 |
| P0A8Z3 | YBGC_ECOLI | 8 | 15 | 53.33% | * | P0A8Z3 |
| P0AFP6 | YBGI_ECOLI |   |    |        | * | P0AFP6 |
| P0AFP6 | YBGI_ECOLI |   |    |        | * | P0AFP6 |
| P0AFP6 | YBGI_ECOLI |   |    |        | * | P0AFP6 |
| P0AFP6 | YBGI_ECOLI |   |    |        | * | P0AFP6 |
| P0AFP6 | YBGI_ECOLI | 4 | 5  | 80.00% | * | P0AFP6 |
| P0AAV4 | YBGJ_ECOLI |   |    |        | * | P0AAV4 |
| P0AAV4 | YBGJ_ECOLI |   |    |        | * | P0AAV4 |
| P0AAV4 | YBGJ_ECOLI | 2 | 3  | 66.67% | * | P0AAV4 |
| P75745 | YBGK_ECOLI |   |    |        | * | P75745 |
| P75745 | YBGK_ECOLI |   |    |        | * | P75745 |
| P75745 | YBGK_ECOLI |   |    |        | * | P75745 |
| P75745 | YBGK_ECOLI | 2 | 4  | 50.00% | * | P75745 |



|        |            |    |    |         |          |
|--------|------------|----|----|---------|----------|
| P75829 | YBJX_ECOLI |    |    |         | * P75829 |
| P75829 | YBJX_ECOLI |    |    |         | * P75829 |
| P75829 | YBJX_ECOLI |    |    |         | * P75829 |
| P75829 | YBJX_ECOLI |    |    |         | * P75829 |
| P75829 | YBJX_ECOLI |    |    |         | * P75829 |
| P75829 | YBJX_ECOLI |    |    |         | * P75829 |
| P75829 | YBJX_ECOLI |    |    |         | * P75829 |
| P75829 | YBJX_ECOLI |    |    |         | * P75829 |
| P75829 | YBJX_ECOLI |    |    |         | * P75829 |
| P75829 | YBJX_ECOLI |    |    |         | * P75829 |
| P75829 | YBJX_ECOLI |    |    |         | * P75829 |
| P75829 | YBJX_ECOLI |    |    |         | * P75829 |
| P75829 | YBJX_ECOLI |    |    |         | * P75829 |
| P75829 | YBJX_ECOLI |    |    |         | * P75829 |
| P75829 | YBJX_ECOLI |    |    |         | * P75829 |
| P75829 | YBJX_ECOLI |    |    |         | * P75829 |
| P75829 | YBJX_ECOLI |    |    |         | * P75829 |
| P75829 | YBJX_ECOLI |    |    |         | * P75829 |
| P75829 | YBJX_ECOLI |    |    |         | * P75829 |
| P75829 | YBJX_ECOLI |    |    |         | * P75829 |
| P75829 | YBJX_ECOLI |    |    |         | * P75829 |
| P75829 | YBJX_ECOLI |    |    |         | * P75829 |
| P75829 | YBJX_ECOLI |    |    |         | * P75829 |
| P75829 | YBJX_ECOLI |    |    |         | * P75829 |
| P75829 | YBJX_ECOLI |    |    |         | * P75829 |
| P75829 | YBJX_ECOLI | 55 | 60 | 91.67%  | * P75829 |
| P21367 | YCAC_ECOLI |    |    |         | * P21367 |
| P21367 | YCAC_ECOLI | 1  | 2  | 50.00%  | * P21367 |
| P75838 | YCAO_ECOLI |    |    |         | * P75838 |
| P75838 | YCAO_ECOLI | 0  | 2  | 0.00%   | * P75838 |
| P22525 | YCBB_ECOLI | 1  | 1  | 100.00% | * P22525 |
| P0A8N0 | YCBG_ECOLI |    |    |         | * P0A8N0 |
| P0A8N0 | YCBG_ECOLI |    |    |         | * P0A8N0 |
| P0A8N0 | YCBG_ECOLI |    |    |         | * P0A8N0 |
| P0A8N0 | YCBG_ECOLI |    |    |         | * P0A8N0 |
| P0A8N0 | YCBG_ECOLI |    |    |         | * P0A8N0 |

|        |            |   |    |         |          |
|--------|------------|---|----|---------|----------|
| P0A8N0 | YCBG_ECOLI | 4 | 6  | 66.67%  | * P0A8N0 |
| P75849 | YCBL_ECOLI |   |    |         | * P75849 |
| P75849 | YCBL_ECOLI |   |    |         | * P75849 |
| P75849 | YCBL_ECOLI | 1 | 3  | 33.33%  | * P75849 |
| P75874 | YCCU_ECOLI | 1 | 1  | 100.00% | * P75874 |
| P0AB28 | YCED_ECOLI |   |    |         | * P0AB28 |
| P0AB28 | YCED_ECOLI |   |    |         | * P0AB28 |
| P0AB28 | YCED_ECOLI |   |    |         | * P0AB28 |
| P0AB28 | YCED_ECOLI |   |    |         | * P0AB28 |
| P0AB28 | YCED_ECOLI |   |    |         | * P0AB28 |
| P0AB28 | YCED_ECOLI |   |    |         | * P0AB28 |
| P0AB28 | YCED_ECOLI |   |    |         | * P0AB28 |
| P0AB28 | YCED_ECOLI |   |    |         | * P0AB28 |
| P0AB28 | YCED_ECOLI |   |    |         | * P0AB28 |
| P0AB28 | YCED_ECOLI | 8 | 10 | 80.00%  | * P0AB28 |
| P0A729 | YCEF_ECOLI |   |    |         | none     |
| P27431 | YCFD_ECOLI |   |    |         | * P27431 |
| P27431 | YCFD_ECOLI |   |    |         | * P27431 |
| P27431 | YCFD_ECOLI |   |    |         | * P27431 |
| P27431 | YCFD_ECOLI |   |    |         | * P27431 |
| P27431 | YCFD_ECOLI |   |    |         | * P27431 |
| P27431 | YCFD_ECOLI |   |    |         | * P27431 |
| P27431 | YCFD_ECOLI |   |    |         | * P27431 |
| P27431 | YCFD_ECOLI |   |    |         | * P27431 |
| P27431 | YCFD_ECOLI |   |    |         | * P27431 |
| P27431 | YCFD_ECOLI |   |    |         | * P27431 |
| P27431 | YCFD_ECOLI | 8 | 12 | 66.67%  | * P27431 |
| P0A8E1 | YCFP_ECOLI |   |    |         | none     |
| P75952 | YCFQ_ECOLI |   |    |         | none     |
| P75961 | YCFZ_ECOLI |   |    |         | none     |
| P29013 | YCGB_ECOLI |   |    |         | * P29013 |
| P29013 | YCGB_ECOLI |   |    |         | * P29013 |
| P29013 | YCGB_ECOLI |   |    |         | * P29013 |
| P29013 | YCGB_ECOLI | 2 | 4  | 50.00%  | * P29013 |

|        |            |    |    |         |          |
|--------|------------|----|----|---------|----------|
| P76000 | YCGI_ECOLI |    |    |         | none     |
| P37052 | YCHJ_ECOLI |    |    |         | * P37052 |
| P37052 | YCHJ_ECOLI |    |    |         | * P37052 |
| P37052 | YCHJ_ECOLI |    |    |         | * P37052 |
| P37052 | YCHJ_ECOLI |    |    |         | * P37052 |
| P37052 | YCHJ_ECOLI |    |    |         | * P37052 |
| P37052 | YCHJ_ECOLI |    |    |         | * P37052 |
| P37052 | YCHJ_ECOLI |    |    |         | * P37052 |
| P37052 | YCHJ_ECOLI |    |    |         | * P37052 |
| P37052 | YCHJ_ECOLI |    |    |         | * P37052 |
| P37052 | YCHJ_ECOLI |    |    |         | * P37052 |
| P37052 | YCHJ_ECOLI |    |    |         | * P37052 |
| P37052 | YCHJ_ECOLI |    |    |         | * P37052 |
| P37052 | YCHJ_ECOLI |    |    |         | * P37052 |
| P37052 | YCHJ_ECOLI |    |    |         | * P37052 |
| P37052 | YCHJ_ECOLI |    |    |         | * P37052 |
| P37052 | YCHJ_ECOLI |    |    |         | * P37052 |
| P37052 | YCHJ_ECOLI |    |    |         | * P37052 |
| P37052 | YCHJ_ECOLI |    |    |         | * P37052 |
| P37052 | YCHJ_ECOLI |    |    |         | * P37052 |
| P37052 | YCHJ_ECOLI |    |    |         | * P37052 |
| P37052 | YCHJ_ECOLI |    |    |         | * P37052 |
| P37052 | YCHJ_ECOLI |    |    |         | * P37052 |
| P37052 | YCHJ_ECOLI |    |    |         | * P37052 |
| P37052 | YCHJ_ECOLI |    |    |         | * P37052 |
| P37052 | YCHJ_ECOLI |    |    |         | * P37052 |
| P37052 | YCHJ_ECOLI |    |    |         | * P37052 |
| P37052 | YCHJ_ECOLI | 15 | 26 | 57.69%  | * P37052 |
| P0A8L7 | YCIU_ECOLI |    |    |         | * P0A8L7 |
| P0A8L7 | YCIU_ECOLI |    |    |         | * P0A8L7 |
| P0A8L7 | YCIU_ECOLI |    |    |         | * P0A8L7 |
| P0A8L7 | YCIU_ECOLI |    |    |         | * P0A8L7 |
| P0A8L7 | YCIU_ECOLI |    |    |         | * P0A8L7 |
| P0A8L7 | YCIU_ECOLI | 6  | 6  | 100.00% | * P0A8L7 |
| P76044 | YCJR_ECOLI |    |    |         | none     |
| P77154 | YCJT_ECOLI |    |    |         | none     |
| P77615 | YCJW_ECOLI |    |    |         | * P77615 |
| P77615 | YCJW_ECOLI |    |    |         | * P77615 |
| P77615 | YCJW_ECOLI | 2  | 3  | 66.67%  | * P77615 |
| P77333 | YCJZ_ECOLI |    |    |         | * P77333 |

|        |            |   |   |         |   |        |
|--------|------------|---|---|---------|---|--------|
| P77333 | YCJZ_ECOLI |   |   |         | * | P77333 |
| P77333 | YCJZ_ECOLI |   |   |         | * | P77333 |
| P77333 | YCJZ_ECOLI |   |   |         | * | P77333 |
| P77333 | YCJZ_ECOLI | 3 | 5 | 60.00%  | * | P77333 |
| P38394 | YDAE_ECOLI |   |   |         | * | P38394 |
| P38394 | YDAE_ECOLI |   |   |         | * | P38394 |
| P38394 | YDAE_ECOLI |   |   |         | * | P38394 |
| P38394 | YDAE_ECOLI | 3 | 4 | 75.00%  | * | P38394 |
| P76053 | YDAL_ECOLI |   |   |         |   | none   |
| P76069 | YDAY_ECOLI |   |   |         | * | P76069 |
| P76069 | YDAY_ECOLI |   |   |         | * | P76069 |
| P76069 | YDAY_ECOLI | 3 | 3 | 100.00% | * | P76069 |
| P76076 | YDBL_ECOLI |   |   |         |   | none   |
| P0ACW6 | YDCH_ECOLI |   |   |         |   | none   |
| P76103 | YDCO_ECOLI |   |   |         |   | none   |
| P77730 | YDCR_ECOLI | 1 | 1 | 100.00% | * | P77730 |
| P77156 | YDCU_ECOLI |   |   |         |   | none   |
| P31826 | YDDA_ECOLI |   |   |         |   | none   |
| P37757 | YDDE_ECOLI |   |   |         | * | P37757 |
| P37757 | YDDE_ECOLI |   |   |         | * | P37757 |
| P37757 | YDDE_ECOLI |   |   |         | * | P37757 |
| P37757 | YDDE_ECOLI |   |   |         | * | P37757 |
| P37757 | YDDE_ECOLI | 4 | 5 | 80.00%  | * | P37757 |
| P39831 | YDFG_ECOLI |   |   |         | * | P39831 |
| P39831 | YDFG_ECOLI |   |   |         | * | P39831 |
| P39831 | YDFG_ECOLI |   |   |         | * | P39831 |
| P39831 | YDFG_ECOLI |   |   |         | * | P39831 |
| P39831 | YDFG_ECOLI |   |   |         | * | P39831 |
| P39831 | YDFG_ECOLI |   |   |         | * | P39831 |
| P39831 | YDFG_ECOLI | 3 | 7 | 42.86%  | * | P39831 |
| P64463 | YDFZ_ECOLI |   |   |         | * | P64463 |
| P64463 | YDFZ_ECOLI |   |   |         | * | P64463 |
| P64463 | YDFZ_ECOLI |   |   |         | * | P64463 |



|        |            |   |    |         |   |        |
|--------|------------|---|----|---------|---|--------|
| P64463 | YDFZ_ECOLI |   |    |         | * | P64463 |
| P64463 | YDFZ_ECOLI |   |    |         | * | P64463 |
| P64463 | YDFZ_ECOLI |   |    |         | * | P64463 |
| P64463 | YDFZ_ECOLI |   |    |         | * | P64463 |
| P64463 | YDFZ_ECOLI |   |    |         | * | P64463 |
| P64463 | YDFZ_ECOLI | 4 | 9  | 44.44%  | * | P64463 |
| P76177 | YDGH_ECOLI |   |    |         |   | none   |
| P77552 | YDHQ_ECOLI |   |    |         | * | P77552 |
| P77552 | YDHQ_ECOLI |   |    |         | * | P77552 |
| P77552 | YDHQ_ECOLI |   |    |         | * | P77552 |
| P77552 | YDHQ_ECOLI |   |    |         | * | P77552 |
| P77552 | YDHQ_ECOLI |   |    |         | * | P77552 |
| P77552 | YDHQ_ECOLI |   |    |         | * | P77552 |
| P77552 | YDHQ_ECOLI |   |    |         | * | P77552 |
| P77552 | YDHQ_ECOLI |   |    |         | * | P77552 |
| P77552 | YDHQ_ECOLI |   |    |         | * | P77552 |
| P77552 | YDHQ_ECOLI |   |    |         | * | P77552 |
| P77552 | YDHQ_ECOLI |   |    |         | * | P77552 |
| P77552 | YDHQ_ECOLI |   |    |         | * | P77552 |
| P77552 | YDHQ_ECOLI | 8 | 14 | 57.14%  | * | P77552 |
| P0ACX3 | YDHR_ECOLI |   |    |         | * | P0ACX3 |
| P0ACX3 | YDHR_ECOLI |   |    |         | * | P0ACX3 |
| P0ACX3 | YDHR_ECOLI | 3 | 3  | 100.00% | * | P0ACX3 |
| P76192 | YDHV_ECOLI |   |    |         |   | none   |
| P64476 | YDIH_ECOLI |   |    |         | * | P64476 |
| P64476 | YDIH_ECOLI |   |    |         | * | P64476 |
| P64476 | YDIH_ECOLI |   |    |         | * | P64476 |
| P64476 | YDIH_ECOLI |   |    |         | * | P64476 |
| P64476 | YDIH_ECOLI |   |    |         | * | P64476 |
| P64476 | YDIH_ECOLI |   |    |         | * | P64476 |
| P64476 | YDIH_ECOLI |   |    |         | * | P64476 |
| P64476 | YDIH_ECOLI |   |    |         | * | P64476 |
| P64476 | YDIH_ECOLI | 8 | 9  | 88.89%  | * | P64476 |
| P77748 | YDIJ_ECOLI |   |    |         |   | none   |
| P0ACY1 | YDJA_ECOLI |   |    |         | * | P0ACY1 |
| P0ACY1 | YDJA_ECOLI |   |    |         | * | P0ACY1 |
| P0ACY1 | YDJA_ECOLI |   |    |         | * | P0ACY1 |

|        |            |    |    |        |          |
|--------|------------|----|----|--------|----------|
| P0ACY1 | YDJA_ECOLI |    |    |        | * P0ACY1 |
| P0ACY1 | YDJA_ECOLI |    |    |        | * P0ACY1 |
| P0ACY1 | YDJA_ECOLI |    |    |        | * P0ACY1 |
| P0ACY1 | YDJA_ECOLI |    |    |        | * P0ACY1 |
| P0ACY1 | YDJA_ECOLI |    |    |        | * P0ACY1 |
| P0ACY1 | YDJA_ECOLI | 5  | 9  | 55.56% | * P0ACY1 |
| P77721 | YDJF_ECOLI |    |    |        | * P77721 |
| P77721 | YDJF_ECOLI |    |    |        | * P77721 |
| P77721 | YDJF_ECOLI |    |    |        | * P77721 |
| P77721 | YDJF_ECOLI |    |    |        | * P77721 |
| P77721 | YDJF_ECOLI |    |    |        | * P77721 |
| P77721 | YDJF_ECOLI |    |    |        | * P77721 |
| P77721 | YDJF_ECOLI |    |    |        | * P77721 |
| P77721 | YDJF_ECOLI |    |    |        | * P77721 |
| P77721 | YDJF_ECOLI |    |    |        | * P77721 |
| P77721 | YDJF_ECOLI |    |    |        | * P77721 |
| P77721 | YDJF_ECOLI |    |    |        | * P77721 |
| P77721 | YDJF_ECOLI |    |    |        | * P77721 |
| P77721 | YDJF_ECOLI |    |    |        | * P77721 |
| P77721 | YDJF_ECOLI | 13 | 14 | 92.86% | * P77721 |
| P39173 | YEAD_ECOLI |    |    |        | * P39173 |
| P39173 | YEAD_ECOLI | 1  | 2  | 50.00% | * P39173 |
| P0ACY3 | YEAG_ECOLI |    |    |        | * P0ACY3 |
| P0ACY3 | YEAG_ECOLI |    |    |        | * P0ACY3 |
| P0ACY3 | YEAG_ECOLI |    |    |        | * P0ACY3 |
| P0ACY3 | YEAG_ECOLI | 2  | 4  | 50.00% | * P0ACY3 |
| P64483 | YEAKECOLI  |    |    |        | * P64483 |
| P64483 | YEAKECOLI  |    |    |        | * P64483 |
| P64483 | YEAKECOLI  |    |    |        | * P64483 |
| P64483 | YEAKECOLI  |    |    |        | * P64483 |
| P64483 | YEAKECOLI  |    |    |        | * P64483 |
| P64483 | YEAKECOLI  |    |    |        | * P64483 |
| P64483 | YEAKECOLI  |    |    |        | * P64483 |
| P64483 | YEAKECOLI  |    |    |        | * P64483 |
| P64483 | YEAKECOLI  |    |    |        | * P64483 |
| P64483 | YEAKECOLI  |    |    |        | * P64483 |
| P64483 | YEAKECOLI  | 9  | 11 | 81.82% | * P64483 |
| P76254 | YEAX_ECOLI |    |    |        | none     |
| P76256 | YEAZ_ECOLI |    |    |        | * P76256 |

|        |            |    |    |         |          |
|--------|------------|----|----|---------|----------|
| P76256 | YEAZ_ECOLI |    |    |         | * P76256 |
| P76256 | YEAZ_ECOLI |    |    |         | * P76256 |
| P76256 | YEAZ_ECOLI |    |    |         | * P76256 |
| P76256 | YEAZ_ECOLI |    |    |         | * P76256 |
| P76256 | YEAZ_ECOLI |    |    |         | * P76256 |
| P76256 | YEAZ_ECOLI |    |    |         | * P76256 |
| P76256 | YEAZ_ECOLI |    |    |         | * P76256 |
| P76256 | YEAZ_ECOLI | 1  | 9  | 11.11%  | * P76256 |
| POA8A0 | YEBC_ECOLI |    |    |         | * POA8A0 |
| POA8A0 | YEBC_ECOLI |    |    |         | * POA8A0 |
| POA8A0 | YEBC_ECOLI |    |    |         | * POA8A0 |
| POA8A0 | YEBC_ECOLI |    |    |         | * POA8A0 |
| POA8A0 | YEBC_ECOLI |    |    |         | * POA8A0 |
| POA8A0 | YEBC_ECOLI |    |    |         | * POA8A0 |
| POA8A0 | YEBC_ECOLI |    |    |         | * POA8A0 |
| POA8A0 | YEBC_ECOLI |    |    |         | * POA8A0 |
| POA8A0 | YEBC_ECOLI |    |    |         | * POA8A0 |
| POA8A0 | YEBC_ECOLI |    |    |         | * POA8A0 |
| POA8A0 | YEBC_ECOLI |    |    |         | * POA8A0 |
| POA8A0 | YEBC_ECOLI |    |    |         | * POA8A0 |
| POA8A0 | YEBC_ECOLI |    |    |         | * POA8A0 |
| POA8A0 | YEBC_ECOLI |    |    |         | * POA8A0 |
| POA8A0 | YEBC_ECOLI | 11 | 16 | 68.75%  | * POA8A0 |
| P76272 | YEBT_ECOLI |    |    |         | none     |
| P64503 | YEBV_ECOLI |    |    |         | none     |
| P37774 | YECC_ECOLI |    |    |         | * P37774 |
| P37774 | YECC_ECOLI |    |    |         | * P37774 |
| P37774 | YECC_ECOLI | 3  | 3  | 100.00% | * P37774 |
| P0ADI7 | YECD_ECOLI |    |    |         | none     |
| P31064 | YEDE_ECOLI |    |    |         | none     |
| P76321 | YEDN_ECOLI |    |    |         | * P76321 |
| P76321 | YEDN_ECOLI |    |    |         | * P76321 |
| P76321 | YEDN_ECOLI | 2  | 3  | 66.67%  | * P76321 |
| P76335 | YEDS_ECOLI |    |    |         | none     |
| POA8M6 | YEEX_ECOLI |    |    |         | none     |

|        |            |   |   |         |          |
|--------|------------|---|---|---------|----------|
| P37749 | YEFG_ECOLI |   |   |         | * P37749 |
| P37749 | YEFG_ECOLI | 1 | 2 | 50.00%  | * P37749 |
| P76393 | YEGI_ECOLI |   |   |         | none     |
| P33354 | YEHR_ECOLI |   |   |         | none     |
| P33355 | YEHS_ECOLI |   |   |         | none     |
| P76440 | YEIT_ECOLI | 0 | 1 | 0.00%   | * P76440 |
| P33913 | YEJA_ECOLI |   |   |         | * P33913 |
| P33913 | YEJA_ECOLI | 2 | 2 | 100.00% | * P33913 |
| P0AD24 | YEJL_ECOLI |   |   |         | none     |
| P17994 | YFAA_ECOLI |   |   |         | * P17994 |
| P17994 | YFAA_ECOLI |   |   |         | * P17994 |
| P17994 | YFAA_ECOLI |   |   |         | * P17994 |
| P17994 | YFAA_ECOLI |   |   |         | * P17994 |
| P17994 | YFAA_ECOLI | 4 | 5 | 80.00%  | * P17994 |
| P0A8W8 | YFBU_ECOLI |   |   |         | none     |
| P0AD30 | YFCA_ECOLI |   |   |         | none     |
| P39199 | YFCB_ECOLI |   |   |         | * P39199 |
| P39199 | YFCB_ECOLI |   |   |         | * P39199 |
| P39199 | YFCB_ECOLI |   |   |         | * P39199 |
| P39199 | YFCB_ECOLI |   |   |         | * P39199 |
| P39199 | YFCB_ECOLI |   |   |         | * P39199 |
| P39199 | YFCB_ECOLI |   |   |         | * P39199 |
| P39199 | YFCB_ECOLI |   |   |         | * P39199 |
| P39199 | YFCB_ECOLI | 7 | 8 | 87.50%  | * P39199 |
| P67095 | YFCE_ECOLI |   |   |         | none     |
| P0AD33 | YFCZ_ECOLI |   |   |         | * P0AD33 |
| P0AD33 | YFCZ_ECOLI |   |   |         | * P0AD33 |
| P0AD33 | YFCZ_ECOLI |   |   |         | * P0AD33 |
| P0AD33 | YFCZ_ECOLI |   |   |         | * P0AD33 |
| P0AD33 | YFCZ_ECOLI |   |   |         | * P0AD33 |
| P0AD33 | YFCZ_ECOLI | 5 | 6 | 83.33%  | * P0AD33 |



|        |            |    |    |        |   |        |
|--------|------------|----|----|--------|---|--------|
| P0AGJ5 | YFIF_ECOLI |    |    |        | * | P0AGJ5 |
| P0AGJ5 | YFIF_ECOLI |    |    |        | * | P0AGJ5 |
| P0AGJ5 | YFIF_ECOLI |    |    |        | * | P0AGJ5 |
| P0AGJ5 | YFIF_ECOLI |    |    |        | * | P0AGJ5 |
| P0AGJ5 | YFIF_ECOLI |    |    |        | * | P0AGJ5 |
| P0AGJ5 | YFIF_ECOLI |    |    |        | * | P0AGJ5 |
| P0AGJ5 | YFIF_ECOLI |    |    |        | * | P0AGJ5 |
| P0AGJ5 | YFIF_ECOLI |    |    |        | * | P0AGJ5 |
| P0AGJ5 | YFIF_ECOLI |    |    |        | * | P0AGJ5 |
| P0AGJ5 | YFIF_ECOLI |    |    |        | * | P0AGJ5 |
| P0AGJ5 | YFIF_ECOLI |    |    |        | * | P0AGJ5 |
| P0AGJ5 | YFIF_ECOLI |    |    |        | * | P0AGJ5 |
| P0AGJ5 | YFIF_ECOLI |    |    |        | * | P0AGJ5 |
| P0AGJ5 | YFIF_ECOLI |    |    |        | * | P0AGJ5 |
| P0AGJ5 | YFIF_ECOLI |    |    |        | * | P0AGJ5 |
| P0AGJ5 | YFIF_ECOLI |    |    |        | * | P0AGJ5 |
| P0AGJ5 | YFIF_ECOLI |    |    |        | * | P0AGJ5 |
| P0AGJ5 | YFIF_ECOLI | 47 | 52 | 90.38% | * | P0AGJ5 |
| P0AC02 | YFIO_ECOLI |    |    |        |   | none   |
| Q47319 | YFIP_ECOLI |    |    |        |   | none   |
| P52124 | YFJI_ECOLI |    |    |        |   | none   |
| P52131 | YFJP_ECOLI |    |    |        |   | none   |
| P52138 | YFJW_ECOLI |    |    |        |   | none   |
| P0AD53 | YGAC_ECOLI |    |    |        |   | none   |
| P65807 | YGEY_ECOLI |    |    |        | * | P65807 |
| P65807 | YGEY_ECOLI |    |    |        | * | P65807 |
| P65807 | YGEY_ECOLI |    |    |        | * | P65807 |
| P65807 | YGEY_ECOLI | 0  | 4  | 0.00%  | * | P65807 |
| P0A8C4 | YGFB_ECOLI |    |    |        |   | none   |
| Q46811 | YGFK_ECOLI |    |    |        |   | none   |
| P0ADE8 | YGFZ_ECOLI |    |    |        | * | P0ADE8 |
| P0ADE8 | YGFZ_ECOLI |    |    |        | * | P0ADE8 |
| P0ADE8 | YGFZ_ECOLI |    |    |        | * | P0ADE8 |
| P0ADE8 | YGFZ_ECOLI | 2  | 4  | 50.00% | * | P0ADE8 |
| P0AG84 | YGHA_ECOLI |    |    |        | * | P0AG84 |

|        |            |   |   |         |   |        |
|--------|------------|---|---|---------|---|--------|
| P0AG84 | YGHA_ECOLI |   |   |         | * | P0AG84 |
| P0AG84 | YGHA_ECOLI |   |   |         | * | P0AG84 |
| P0AG84 | YGHA_ECOLI | 3 | 4 | 75.00%  | * | P0AG84 |
| Q46841 | YGHQ_ECOLI |   |   |         |   | none   |
| P0ADU2 | YGIN_ECOLI | 1 | 1 | 100.00% | * | P0ADU2 |
| Q46864 | YGIT_ECOLI |   |   |         |   | none   |
| P0ADU5 | YGIW_ECOLI |   |   |         |   | none   |
| P63417 | YHBS_ECOLI |   |   |         | * | P63417 |
| P63417 | YHBS_ECOLI |   |   |         | * | P63417 |
| P63417 | YHBS_ECOLI |   |   |         | * | P63417 |
| P63417 | YHBS_ECOLI |   |   |         | * | P63417 |
| P63417 | YHBS_ECOLI |   |   |         | * | P63417 |
| P63417 | YHBS_ECOLI |   |   |         | * | P63417 |
| P63417 | YHBS_ECOLI | 4 | 7 | 57.14%  | * | P63417 |
| P13518 | YHDA_ECOLI |   |   |         |   | none   |
| P25536 | YHDE_ECOLI |   |   |         | * | P25536 |
| P25536 | YHDE_ECOLI | 1 | 2 | 50.00%  | * | P25536 |
| P45766 | YHDW_ECOLI |   |   |         |   | none   |
| P64624 | YHEO_ECOLI |   |   |         |   | none   |
| P45524 | YHET_ECOLI |   |   |         | * | P45524 |
| P45524 | YHET_ECOLI | 2 | 2 | 100.00% | * | P45524 |
| P64627 | YHFL_ECOLI |   |   |         |   | none   |
| P46837 | YHGF_ECOLI |   |   |         | * | P46837 |
| P46837 | YHGF_ECOLI | 1 | 2 | 50.00%  | * | P46837 |
| P37613 | YHHK_ECOLI | 0 | 1 | 0.00%   | * | P37613 |
| P37614 | YHHL_ECOLI |   |   |         |   | none   |
| P37624 | YHIH_ECOLI |   |   |         |   | none   |
| P68567 | YHIQ_ECOLI |   |   |         |   | none   |





|        |            |    |    |         |   |        |
|--------|------------|----|----|---------|---|--------|
| P32162 | YIIS_ECOLI |    |    |         | * | P32162 |
| P32162 | YIIS_ECOLI |    |    |         | * | P32162 |
| P32162 | YIIS_ECOLI |    |    |         | * | P32162 |
| P32162 | YIIS_ECOLI |    |    |         | * | P32162 |
| P32162 | YIIS_ECOLI |    |    |         | * | P32162 |
| P32162 | YIIS_ECOLI |    |    |         | * | P32162 |
| P32162 | YIIS_ECOLI | 15 | 23 | 65.22%  | * | P32162 |
| P32677 | YIJO_ECOLI |    |    |         |   | none   |
| P0AF50 | YJBR_ECOLI | 1  | 1  | 100.00% | * | P0AF50 |
| P0ACU7 | YJDC_ECOLI |    |    |         |   | none   |
| P0AF67 | YJEE_ECOLI |    |    |         | * | P0AF67 |
| P0AF67 | YJEE_ECOLI |    |    |         | * | P0AF67 |
| P0AF67 | YJEE_ECOLI |    |    |         | * | P0AF67 |
| P0AF67 | YJEE_ECOLI |    |    |         | * | P0AF67 |
| P0AF67 | YJEE_ECOLI |    |    |         | * | P0AF67 |
| P0AF67 | YJEE_ECOLI |    |    |         | * | P0AF67 |
| P0AF67 | YJEE_ECOLI |    |    |         | * | P0AF67 |
| P0AF67 | YJEE_ECOLI |    |    |         | * | P0AF67 |
| P0AF67 | YJEE_ECOLI |    |    |         | * | P0AF67 |
| P0AF67 | YJEE_ECOLI |    |    |         | * | P0AF67 |
| P0AF67 | YJEE_ECOLI |    |    |         | * | P0AF67 |
| P0AF67 | YJEE_ECOLI |    |    |         | * | P0AF67 |
| P0AF67 | YJEE_ECOLI |    |    |         | * | P0AF67 |
| P0AF67 | YJEE_ECOLI |    |    |         | * | P0AF67 |
| P0AF67 | YJEE_ECOLI |    |    |         | * | P0AF67 |
| P0AF67 | YJEE_ECOLI |    |    |         | * | P0AF67 |
| P0AF67 | YJEE_ECOLI |    |    |         | * | P0AF67 |
| P0AF67 | YJEE_ECOLI |    |    |         | * | P0AF67 |
| P0AF67 | YJEE_ECOLI |    |    |         | * | P0AF67 |
| P0AF67 | YJEE_ECOLI | 16 | 20 | 80.00%  | * | P0AF67 |
| P31806 | YJEF_ECOLI |    |    |         | * | P31806 |
| P31806 | YJEF_ECOLI |    |    |         | * | P31806 |
| P31806 | YJEF_ECOLI |    |    |         | * | P31806 |
| P31806 | YJEF_ECOLI |    |    |         | * | P31806 |
| P31806 | YJEF_ECOLI |    |    |         | * | P31806 |
| P31806 | YJEF_ECOLI |    |    |         | * | P31806 |
| P31806 | YJEF_ECOLI |    |    |         | * | P31806 |
| P31806 | YJEF_ECOLI |    |    |         | * | P31806 |
| P31806 | YJEF_ECOLI | 7  | 9  | 77.78%  | * | P31806 |

|        |            |   |   |         |          |
|--------|------------|---|---|---------|----------|
| P37772 | YJFF_ECOLI |   |   |         | none     |
| P0AF90 | YJGD_ECOLI |   |   |         | * P0AF90 |
| P0AF90 | YJGD_ECOLI |   |   |         | * P0AF90 |
| P0AF90 | YJGD_ECOLI |   |   |         | * P0AF90 |
| P0AF90 | YJGD_ECOLI |   |   |         | * P0AF90 |
| P0AF90 | YJGD_ECOLI |   |   |         | * P0AF90 |
| P0AF90 | YJGD_ECOLI |   |   |         | * P0AF90 |
| P0AF90 | YJGD_ECOLI | 4 | 7 | 57.14%  | * P0AF90 |
| P0AF93 | YJGF_ECOLI |   |   |         | none     |
| P0AF96 | YJGK_ECOLI |   |   |         | none     |
| P39353 | YJHC_ECOLI |   |   |         | none     |
| P39356 | YJHU_ECOLI |   |   |         | none     |
| P24203 | YJIA_ECOLI |   |   |         | none     |
| P39376 | YJIE_ECOLI | 1 | 1 | 100.00% | * P39376 |
| P39384 | YJIM_ECOLI |   |   |         | none     |
| P37342 | YJJI_ECOLI | 1 | 1 | 100.00% | * P37342 |
| P0A9W3 | YJJK_ECOLI | 1 | 1 | 100.00% | * P0A9W3 |
| P39411 | YJXX_ECOLI |   |   |         | none     |
| P75678 | YKFA_ECOLI |   |   |         | none     |
| P77252 | YKGE_ECOLI |   |   |         | none     |
| P75919 | YMDC_ECOLI |   |   |         | none     |
| P0AEB5 | YNAI_ECOLI |   |   |         | none     |
| P76116 | YNCE_ECOLI | 0 | 1 | 0.00%   | * P76116 |
| P0AAJ1 | YNFG_ECOLI |   |   |         | none     |
| P0AEB7 | YOAB_ECOLI |   |   |         | none     |
| P64508 | YOBF_ECOLI |   |   |         | none     |

|        |            |   |   |         |          |
|--------|------------|---|---|---------|----------|
| Q2EES6 | YOHO_ECOLI |   |   |         | none     |
| P76561 | YPFH_ECOLI |   |   |         | none     |
| P10018 | YPR2_ECOLX |   |   |         | none     |
| P0A8W5 | YQGE_ECOLI |   |   |         | * P0A8W5 |
| P0A8W5 | YQGE_ECOLI |   |   |         | * P0A8W5 |
| P0A8W5 | YQGE_ECOLI |   |   |         | * P0A8W5 |
| P0A8W5 | YQGE_ECOLI |   |   |         | * P0A8W5 |
| P0A8W5 | YQGE_ECOLI |   |   |         | * P0A8W5 |
| P0A8W5 | YQGE_ECOLI |   |   |         | * P0A8W5 |
| P0A8W5 | YQGE_ECOLI |   |   |         | * P0A8W5 |
| P0A8W5 | YQGE_ECOLI |   |   |         | * P0A8W5 |
| P0A8W5 | YQGE_ECOLI | 7 | 9 | 77.78%  | * P0A8W5 |
| Q46856 | YQHD_ECOLI |   |   |         | * Q46856 |
| Q46856 | YQHD_ECOLI | 2 | 2 | 100.00% | * Q46856 |
| P77306 | YQIK_ECOLI |   |   |         | * P77306 |
| P77306 | YQIK_ECOLI |   |   |         | * P77306 |
| P77306 | YQIK_ECOLI |   |   |         | * P77306 |
| P77306 | YQIK_ECOLI | 0 | 4 | 0.00%   | * P77306 |
| P64581 | YQJD_ECOLI |   |   |         | none     |
| P64588 | YQJI_ECOLI |   |   |         | * P64588 |
| P64588 | YQJI_ECOLI | 1 | 2 | 50.00%  | * P64588 |
| P21314 | YR75_ECOLX |   |   |         | * none   |
| P21324 | YR7J_ECOLX |   |   |         | *        |
| P0A9W9 | YRDA_ECOLI |   |   |         | * none   |
| P45751 | YRFB_ECOLI |   |   |         | * none   |
| P64636 | YRFG_ECOLI |   |   |         | * none   |
| P39187 | YTFJ_ECOLI |   |   |         | * none   |
| P0ADE4 | YTFM_ECOLI | 1 | 1 | 100.00% | * P0ADE4 |
| P39321 | YTFN_ECOLI |   |   |         | * none   |

|        |            |             |             |               |          |
|--------|------------|-------------|-------------|---------------|----------|
| P0AE48 | YTFP_ECOLI |             |             |               | * none   |
| Q6BEX0 | YTFR_ECOLI |             |             |               | * none   |
| P34211 | YUAR_ECOLI |             |             |               | * none   |
| Q9S4X2 | YUBD_ECOLI |             |             |               | * none   |
| Q9S4W2 | YUBM_ECOLI |             |             |               | * none   |
| P0ADS2 | ZAPA_ECOLI |             |             |               | * P0ADS2 |
| P0ADS2 | ZAPA_ECOLI |             |             |               | * P0ADS2 |
| P0ADS2 | ZAPA_ECOLI | 1           | 3           | 33.33%        | * P0ADS2 |
| Q1JQN5 | ZAPA_ECOLX |             |             |               |          |
| P0AF36 | ZAPB_ECOLI |             |             |               | * none   |
| P39832 | ZNUB_ECOLI |             |             |               | * none   |
|        |            | <b>2682</b> | <b>3724</b> | <b>72.02%</b> |          |

| ID     | interactor B | interactor A | interactor B | Alias interactor A | Alias interactor B |
|--------|--------------|--------------|--------------|--------------------|--------------------|
| P18843 | 6pgd_ecoli   | 6pgd_ecoli   | nade_ecoli   | gnd                | nadE               |
| P22259 | 6pgd_ecoli   | 6pgd_ecoli   | pcka_ecoli   | gnd                | pckA               |
| P15288 | 6pgd_ecoli   | 6pgd_ecoli   | pepd_ecoli   | gnd                | pepD               |
| P0AAJ3 | 6pgl_ecoli   | 6pgl_ecoli   | fdnh_ecoli   | pgl                | fdnH               |
| P0A717 | 6pgl_ecoli   | 6pgl_ecoli   | kprs_ecoli   | pgl                | prs                |
| P18843 | 6pgl_ecoli   | 6pgl_ecoli   | nade_ecoli   | pgl                | nadE               |
| P0AA43 | 6pgl_ecoli   | 6pgl_ecoli   | rsua_ecoli   | pgl                | rsuA               |
| P0AD35 | 6pgl_ecoli   | 6pgl_ecoli   | yfdo_ecoli   | pgl                | yfdO               |
| P18843 | aat_ecoli    | aat_ecoli    | nade_ecoli   | aspC               | nadE               |
| P0A9Q5 | acca_ecoli   | acca_ecoli   | accd_ecoli   | accA               | accD               |
| P0A9Q5 | acca_ecoli   | acca_ecoli   | accd_ecoli   | accA               | accD               |
| P0A9Q5 | acca_ecoli   | acca_ecoli   | accd_ecoli   | accA               | accD               |
| P0A6F5 | acca_ecoli   | acca_ecoli   | ch60_ecoli   | accA               | groL               |
| P0A6Y8 | acca_ecoli   | acca_ecoli   | dnak_ecoli   | accA               | dnaK               |
| P36553 | acca_ecoli   | acca_ecoli   | hem6_ecoli   | accA               | hemF               |
| P0A705 | acca_ecoli   | acca_ecoli   | if2_ecoli    | accA               | infB               |
| P0A717 | acca_ecoli   | acca_ecoli   | kprs_ecoli   | accA               | prs                |
| P0C018 | acca_ecoli   | acca_ecoli   | rl18_ecoli   | accA               | rpIR               |
| P61175 | acca_ecoli   | acca_ecoli   | rl22_ecoli   | accA               | rpIV               |
| P0ADZ0 | acca_ecoli   | acca_ecoli   | rl23_ecoli   | accA               | rpIW               |
| P60438 | acca_ecoli   | acca_ecoli   | rl3_ecoli    | accA               | rpIC               |
| P0A8N5 | acca_ecoli   | acca_ecoli   | syk2_ecoli   | accA               | lysU               |
| P0ABD5 | accC_ecoli   | accC_ecoli   | acca_ecoli   | accC               | accA               |
| P0A9Q5 | accC_ecoli   | accC_ecoli   | accd_ecoli   | accC               | accD               |
| P0ABD8 | accC_ecoli   | accC_ecoli   | bccp_ecoli   | accC               | accB               |
| P0ABD8 | accC_ecoli   | accC_ecoli   | bccp_ecoli   | accC               | accB               |
| P0ABD8 | accC_ecoli   | accC_ecoli   | bccp_ecoli   | accC               | accB               |
| P16703 | accC_ecoli   | accC_ecoli   | cysm_ecoli   | accC               | cysM               |
| P0A6Y8 | accC_ecoli   | accC_ecoli   | dnak_ecoli   | accC               | dnaK               |
| P0A988 | accC_ecoli   | accC_ecoli   | dpo3b_ecoli  | accC               | dnaN               |
| P0A6W5 | accC_ecoli   | accC_ecoli   | grea_ecoli   | accC               | greA               |
| P18843 | accC_ecoli   | accC_ecoli   | nade_ecoli   | accC               | nadE               |
| P60438 | accC_ecoli   | accC_ecoli   | rl3_ecoli    | accC               | rpIC               |
| P45768 | accC_ecoli   | accC_ecoli   | yhdy_ecoli   | accC               | yhdY               |
| P32160 | accC_ecoli   | accC_ecoli   | yiiq_ecoli   | accC               | yiiQ               |
| P32162 | accC_ecoli   | accC_ecoli   | yiis_ecoli   | accC               | yiiS               |
| P45465 | accC_ecoli   | accC_ecoli   | yran_ecoli   | accC               | yraN               |
| P33937 | acea_ecoli   | acea_ecoli   | napa_ecoli   | aceA               | napA               |
| P60906 | acea_ecoli   | acea_ecoli   | syh_ecoli    | aceA               | hisS               |

|        |             |             |      |       |
|--------|-------------|-------------|------|-------|
| P0AE08 | acka_ecoli  | ahpc_ecoli  | ackA | ahpC  |
| P0A6K3 | acka_ecoli  | def_ecoli   | ackA | def   |
| P0A9A9 | acka_ecoli  | fur_ecoli   | ackA | fur   |
| P0A825 | acka_ecoli  | glya_ecoli  | ackA | glyA  |
| P0A6W5 | acka_ecoli  | grea_ecoli  | ackA | greA  |
| P30128 | acka_ecoli  | greb_ecoli  | ackA | greB  |
| P09127 | acka_ecoli  | hemx_ecoli  | ackA | hemX  |
| P0AEW1 | acka_ecoli  | hyfe_ecoli  | ackA | hyfE  |
| P45395 | acka_ecoli  | kdsd_ecoli  | ackA | kdsD  |
| P0A738 | acka_ecoli  | moac_ecoli  | ackA | moaC  |
| P0A7M2 | acka_ecoli  | rl28_ecoli  | ackA | rpmB  |
| P24252 | acka_ecoli  | ybga_ecoli  | ackA | ybgA  |
|        |             |             |      |       |
| P18843 | acon1_ecoli | nade_ecoli  | acnA | nadE  |
|        |             |             |      |       |
| P13458 | acon2_ecoli | sbcc_ecoli  | acnB | sbcC  |
| P0A7F6 | acon2_ecoli | sped_ecoli  | acnB | speD  |
| P69822 | acon2_ecoli | ulab_ecoli  | acnB | ulaB  |
|        |             |             |      |       |
| P31119 | acp_ecoli   | aas_ecoli   | acpP | aas   |
| P0ABD5 | acp_ecoli   | acca_ecoli  | acpP | accA  |
| P24224 | acp_ecoli   | acps_ecoli  | acpP | acpS  |
| P24224 | acp_ecoli   | acps_ecoli  | acpP | acpS  |
| P0AB65 | acp_ecoli   | acyp_ecoli  | acpP | yccX  |
| P33224 | acp_ecoli   | aidb_ecoli  | acpP | aidB  |
| P33224 | acp_ecoli   | aidb_ecoli  | acpP | aidB  |
| P0ACF4 | acp_ecoli   | dbhb_ecoli  | acpP | hupB  |
| P0A9P0 | acp_ecoli   | dldh_ecoli  | acpP | lpdA  |
| P0A9P0 | acp_ecoli   | dldh_ecoli  | acpP | lpdA  |
| O32591 | acp_ecoli   | espP_ecolx  | acpP | espP  |
| P0A953 | acp_ecoli   | fabb_ecoli  | acpP | fabB  |
| P0A953 | acp_ecoli   | fabb_ecoli  | acpP | fabB  |
| P0AAI5 | acp_ecoli   | fabf_ecoli  | acpP | fabF  |
| P0AAI5 | acp_ecoli   | fabf_ecoli  | acpP | fabF  |
| P0AAI5 | acp_ecoli   | fabf_ecoli  | acpP | fabF  |
| P0AEK2 | acp_ecoli   | fabg_ecoli  | acpP | fabG  |
| P0AEK2 | acp_ecoli   | fabg_ecoli  | acpP | fabG  |
| P0A6R0 | acp_ecoli   | fabh_ecoli  | acpP | fabH  |
| P0A6Q6 | acp_ecoli   | fabz_ecoli  | acpP | fabZ  |
| P0ACC7 | acp_ecoli   | glmu_ecoli  | acpP | glmU  |
| P0ACC7 | acp_ecoli   | glmu_ecoli  | acpP | glmU  |
| Q47718 | acp_ecoli   | inso2_ecoli | acpP | insO2 |

|        |            |            |      |       |
|--------|------------|------------|------|-------|
| P0A6B7 | acp_ecoli  | iscs_ecoli | acpP | iscS  |
| P21645 | acp_ecoli  | lpxd_ecoli | acpP | lpxD  |
| P21645 | acp_ecoli  | lpxd_ecoli | acpP | lpxD  |
| P06993 | acp_ecoli  | malt_ecoli | acpP | malT  |
| P22523 | acp_ecoli  | mukb_ecoli | acpP | mukB  |
| P22523 | acp_ecoli  | mukb_ecoli | acpP | mukB  |
| P0AFG8 | acp_ecoli  | odp1_ecoli | acpP | aceE  |
| P06959 | acp_ecoli  | odp2_ecoli | acpP | aceF  |
| P0A7A7 | acp_ecoli  | plsB_ecoli | acpP | plsB  |
| P0A7A7 | acp_ecoli  | plsB_ecoli | acpP | plsB  |
| P0AB89 | acp_ecoli  | pur8_ecoli | acpP | purB  |
| P0AG40 | acp_ecoli  | ribf_ecoli | acpP | ribF  |
| P02413 | acp_ecoli  | rl15_ecoli | acpP | rpIO  |
| P61175 | acp_ecoli  | rl22_ecoli | acpP | rpIV  |
| P0A7M2 | acp_ecoli  | rl28_ecoli | acpP | rpmB  |
| P0A7S9 | acp_ecoli  | rs13_ecoli | acpP | rpsM  |
| P02358 | acp_ecoli  | rs6_ecoli  | acpP | rpsF  |
| P02359 | acp_ecoli  | rs7_ecoli  | acpP | rpsG  |
| P02359 | acp_ecoli  | rs7_ecoli  | acpP | rpsG  |
| P0A7W7 | acp_ecoli  | rs8_ecoli  | acpP | rpsH  |
| P10408 | acp_ecoli  | seca_ecoli | acpP | secA  |
| P10408 | acp_ecoli  | seca_ecoli | acpP | secA  |
| P10408 | acp_ecoli  | seca_ecoli | acpP | secA  |
| P0AG24 | acp_ecoli  | spot_ecoli | acpP | spoT  |
| P0AG24 | acp_ecoli  | spot_ecoli | acpP | spoT  |
| P0A8Z3 | acp_ecoli  | ybgc_ecoli | acpP | ybgC  |
| P0A8Z3 | acp_ecoli  | ybgc_ecoli | acpP | ybgC  |
| P0A8Z3 | acp_ecoli  | ybgc_ecoli | acpP | ybgC  |
| P0A8Z3 | acp_ecoli  | ybgc_ecoli | acpP | ybgC  |
| P0A8Z3 | acp_ecoli  | ybgc_ecoli | acpP | ybgC  |
| P0AAV4 | acp_ecoli  | ybgj_ecoli | acpP | ybgJ  |
| P0AGK4 | acp_ecoli  | yhby_ecoli | acpP | yhby  |
| P0ADQ2 | acp_ecoli  | yiid_ecoli | acpP | yiiD  |
| P0ADQ2 | acp_ecoli  | yiid_ecoli | acpP | yiiD  |
|        |            |            |      |       |
| P13035 | acrr_ecoli | glpd_ecoli | acrR | glpD  |
|        |            |            |      |       |
| P23325 | add_ecoli  | arpa_ecoli | add  | arpA  |
| P15877 | add_ecoli  | dhg_ecoli  | add  | gcd   |
| P15042 | add_ecoli  | dnlj_ecoli | add  | ligA  |
| P19776 | add_ecoli  | insc_ecoli | add  | insC7 |
| P0A7L3 | add_ecoli  | rl20_ecoli | add  | rpIT  |
| P0A7S9 | add_ecoli  | rs13_ecoli | add  | rpsM  |

|        |            |              |      |       |
|--------|------------|--------------|------|-------|
| P00722 | adhe_ecoli | bgal_ecoli   | adhE | lacZ  |
| P76056 | adhe_ecoli | intr_ecoli   | adhE | intrR |
| P18843 | adhe_ecoli | nade_ecoli   | adhE | nadE  |
| P60422 | adhe_ecoli | rl2_ecoli    | adhE | rplB  |
| P0A7M2 | adhe_ecoli | rl28_ecoli   | adhE | rpmB  |
| P0A7V0 | adhe_ecoli | rs2_ecoli    | adhE | rpsB  |
| P0AA43 | adhe_ecoli | rsua_ecoli   | adhE | rsuA  |
|        |            |              |      |       |
| P0A6X3 | agp_ecoli  | hfq_ecoli    | agp  | hfq   |
| P08337 | agp_ecoli  | mutt_ecoli   | agp  | mutT  |
| P64574 | agp_ecoli  | yghw_ecoli   | agp  | yghW  |
|        |            |              |      |       |
| P00722 | ahpc_ecoli | bgal_ecoli   | ahpC | lacZ  |
| P08394 | ahpc_ecoli | ex5b_ecoli   | ahpC | recB  |
| P37689 | ahpc_ecoli | gpml_ecoli   | ahpC | gpml  |
| P0A799 | ahpc_ecoli | pgk_ecoli    | ahpC | pgk   |
| P16918 | ahpc_ecoli | rhsc_ecoli   | ahpC | rhcC  |
| P24211 | ahpc_ecoli | rhse_ecoli   | ahpC | rhcE  |
| P46850 | ahpc_ecoli | rtcb_ecoli   | ahpC | rtcB  |
|        |            |              |      |       |
| Q79BD2 | ahpf_ecoli | q79bd2_ecolx | ahpF | -     |
| P76161 | ahpf_ecoli | req2_ecoli   | ahpF | quuQ  |
| P78271 | ahpf_ecoli | yfes_ecoli   | ahpF | yfeS  |
|        |            |              |      |       |
| P0A6F5 | aidb_ecoli | ch60_ecoli   | aidB | groL  |
| P0A6F5 | aidb_ecoli | ch60_ecoli   | aidB | groL  |
| P0A6Y8 | aidb_ecoli | dnak_ecoli   | aidB | dnaK  |
| P0A6Y8 | aidb_ecoli | dnak_ecoli   | aidB | dnaK  |
| P67910 | aidb_ecoli | hldd_ecoli   | aidB | hldD  |
| P06959 | aidb_ecoli | odp2_ecoli   | aidB | aceF  |
| P06959 | aidb_ecoli | odp2_ecoli   | aidB | aceF  |
| P0A7L0 | aidb_ecoli | rl1_ecoli    | aidB | rplA  |
| P0AA10 | aidb_ecoli | rl13_ecoli   | aidB | rplM  |
| P0A7K6 | aidb_ecoli | rl19_ecoli   | aidB | rplS  |
| P0AG48 | aidb_ecoli | rl21_ecoli   | aidB | rplU  |
| P61175 | aidb_ecoli | rl22_ecoli   | aidB | rplV  |
| P0A7M2 | aidb_ecoli | rl28_ecoli   | aidB | rpmB  |
| P60438 | aidb_ecoli | rl3_ecoli    | aidB | rplC  |
| P60438 | aidb_ecoli | rl3_ecoli    | aidB | rplC  |
| P0A7S3 | aidb_ecoli | rs12_ecoli   | aidB | rpsL  |
| P0AG59 | aidb_ecoli | rs14_ecoli   | aidB | rpsN  |
| P0A7U3 | aidb_ecoli | rs19_ecoli   | aidB | rpsS  |



|        |            |            |      |      |
|--------|------------|------------|------|------|
| P0A7V0 | aidb_ecoli | rs2_ecoli  | aidB | rpsB |
| P0A7U7 | aidb_ecoli | rs20_ecoli | aidB | rpsT |
| P0A7V8 | aidb_ecoli | rs4_ecoli  | aidB | rpsD |
| P0A7W1 | aidb_ecoli | rs5_ecoli  | aidB | rpsE |
| P02358 | aidb_ecoli | rs6_ecoli  | aidB | rpsF |
| P02359 | aidb_ecoli | rs7_ecoli  | aidB | rpsG |
| P0AGK4 | aidb_ecoli | yhby_ecoli | aidB | yhbY |
| P0AF90 | aidb_ecoli | yjgd_ecoli | aidB | yjgD |
| P35340 | ak1h_ecoli | ahpf_ecoli | thrA | ahpF |
| P13035 | ak1h_ecoli | glpd_ecoli | thrA | glpD |
| P0A6Y8 | alf_ecoli  | dnak_ecoli | fbaA | dnaK |
| P0A6Y8 | alf_ecoli  | dnak_ecoli | fbaA | dnaK |
| P61949 | alf_ecoli  | flav_ecoli | fbaA | fldA |
| P0A7V0 | alf_ecoli  | rs2_ecoli  | fbaA | rpsB |
| P08956 | alf_ecoli  | t1rk_ecoli | fbaA | hsdR |
| P0ACR7 | alf_ecoli  | yfer_ecoli | fbaA | yfeR |
| P08622 | alf1_ecoli | dnaj_ecoli | fbaB | dnaJ |
| P0A6Y8 | alf1_ecoli | dnak_ecoli | fbaB | dnaK |
| P77395 | alf1_ecoli | ybbn_ecoli | fbaB | ybbN |
| P77395 | alf1_ecoli | ybbn_ecoli | fbaB | ybbN |
| P00722 | alkh_ecoli | bgal_ecoli | eda  | lacZ |
| P06611 | alkh_ecoli | btud_ecoli | eda  | btuD |
| P0A6F5 | alkh_ecoli | ch60_ecoli | eda  | groL |
| P31678 | alkh_ecoli | otsb_ecoli | eda  | otsB |
| P16916 | alkh_ecoli | rhsa_ecoli | eda  | rhsA |
| P60422 | alkh_ecoli | rl2_ecoli  | eda  | rplB |
| P75989 | alkh_ecoli | ycge_ecoli | eda  | ycgE |
| POC8K0 | allc_ecoli | kbaz_ecoli | allC | kbaZ |
| P18843 | allc_ecoli | nade_ecoli | allC | nadE |
| P0A7U7 | allc_ecoli | rs20_ecoli | allC | rpsT |
| P0A870 | allc_ecoli | talb_ecoli | allC | talB |
| P0AED5 | allc_ecoli | uvry_ecoli | allC | uvrY |
| P0ACF0 | allr_ecoli | dbha_ecoli | allR | hupA |
| P0AC41 | allr_ecoli | dhsa_ecoli | allR | sdhA |
| P0A6F3 | allr_ecoli | glpk_ecoli | allR | glpK |
| P0A7L0 | allr_ecoli | rl1_ecoli  | allR | rplA |
| POC018 | allr_ecoli | rl18_ecoli | allR | rplR |

|        |                            |                            |      |      |
|--------|----------------------------|----------------------------|------|------|
| P0A7K6 | <a href="#">allr_ecoli</a> | <a href="#">rl19_ecoli</a> | allR | rplS |
| P60422 | <a href="#">allr_ecoli</a> | <a href="#">rl2_ecoli</a>  | allR | rplB |
| P0AG48 | <a href="#">allr_ecoli</a> | <a href="#">rl21_ecoli</a> | allR | rplU |
| P60624 | <a href="#">allr_ecoli</a> | <a href="#">rl24_ecoli</a> | allR | rplX |
| P0AG71 | <a href="#">allr_ecoli</a> | <a href="#">rmuc_ecoli</a> | allR | rmuC |
| P0A7S3 | <a href="#">allr_ecoli</a> | <a href="#">rs12_ecoli</a> | allR | rpsL |
| P0A7S9 | <a href="#">allr_ecoli</a> | <a href="#">rs13_ecoli</a> | allR | rpsM |
| P0AG59 | <a href="#">allr_ecoli</a> | <a href="#">rs14_ecoli</a> | allR | rpsN |
| P0ADZ4 | <a href="#">allr_ecoli</a> | <a href="#">rs15_ecoli</a> | allR | rpsO |
| P0A7W1 | <a href="#">allr_ecoli</a> | <a href="#">rs5_ecoli</a>  | allR | rpsE |
| P02358 | <a href="#">allr_ecoli</a> | <a href="#">rs6_ecoli</a>  | allR | rpsF |
| P02359 | <a href="#">allr_ecoli</a> | <a href="#">rs7_ecoli</a>  | allR | rpsG |
| P0A843 | <a href="#">allr_ecoli</a> | <a href="#">tate_ecoli</a> | allR | tatE |
|        |                            |                            |      |      |
| P18843 | <a href="#">amia_ecoli</a> | <a href="#">nade_ecoli</a> | amiA | nadE |
| P60723 | <a href="#">amia_ecoli</a> | <a href="#">rl4_ecoli</a>  | amiA | rplD |
|        |                            |                            |      |      |
| P0A6F5 | <a href="#">amn_ecoli</a>  | <a href="#">ch60_ecoli</a> | amn  | groL |
| P37024 | <a href="#">amn_ecoli</a>  | <a href="#">hrpb_ecoli</a> | amn  | hrpB |
| P0AD96 | <a href="#">amn_ecoli</a>  | <a href="#">livj_ecoli</a> | amn  | livJ |
| P77257 | <a href="#">amn_ecoli</a>  | <a href="#">lsra_ecoli</a> | amn  | lsrA |
| P17888 | <a href="#">amn_ecoli</a>  | <a href="#">pria_ecoli</a> | amn  | priA |
| P10408 | <a href="#">amn_ecoli</a>  | <a href="#">seca_ecoli</a> | amn  | secA |
|        |                            |                            |      |      |
| P00722 | <a href="#">ampa_ecoli</a> | <a href="#">bgal_ecoli</a> | pepA | lacZ |
| P0AFG6 | <a href="#">ampa_ecoli</a> | <a href="#">odo2_ecoli</a> | pepA | sucB |
| P0A786 | <a href="#">ampa_ecoli</a> | <a href="#">pyrb_ecoli</a> | pepA | pyrB |
|        |                            |                            |      |      |
| P0A9P6 | <a href="#">ampm_ecoli</a> | <a href="#">dead_ecoli</a> | map  | deaD |
| P04425 | <a href="#">ampm_ecoli</a> | <a href="#">gshb_ecoli</a> | map  | gshB |
| P77791 | <a href="#">ampm_ecoli</a> | <a href="#">maa_ecoli</a>  | map  | maa  |
| P76398 | <a href="#">ampm_ecoli</a> | <a href="#">mdtb_ecoli</a> | map  | mdtB |
| P15032 | <a href="#">ampm_ecoli</a> | <a href="#">rece_ecoli</a> | map  | recE |
| P0AA10 | <a href="#">ampm_ecoli</a> | <a href="#">rl13_ecoli</a> | map  | rplM |
| P0A7K6 | <a href="#">ampm_ecoli</a> | <a href="#">rl19_ecoli</a> | map  | rplS |
| P61175 | <a href="#">ampm_ecoli</a> | <a href="#">rl22_ecoli</a> | map  | rplV |
| P0ADZ0 | <a href="#">ampm_ecoli</a> | <a href="#">rl23_ecoli</a> | map  | rplW |
| P0A7M2 | <a href="#">ampm_ecoli</a> | <a href="#">rl28_ecoli</a> | map  | rplB |
| P0A7N9 | <a href="#">ampm_ecoli</a> | <a href="#">rl33_ecoli</a> | map  | rplG |

|        |            |            |      |      |
|--------|------------|------------|------|------|
| P60723 | ampm_ecoli | rl4_ecoli  | map  | rplD |
| P0A7K2 | ampm_ecoli | rl7_ecoli  | map  | rplL |
| P0A7R1 | ampm_ecoli | rl9_ecoli  | map  | rplI |
| P0A7R5 | ampm_ecoli | rs10_ecoli | map  | rpsJ |
| P0A7T3 | ampm_ecoli | rs16_ecoli | map  | rpsP |
| P0A7V0 | ampm_ecoli | rs2_ecoli  | map  | rpsB |
| P0A7U7 | ampm_ecoli | rs20_ecoli | map  | rpsT |
| P0A7W1 | ampm_ecoli | rs5_ecoli  | map  | rpsE |
| P0ACT6 | ampm_ecoli | uidr_ecoli | map  | uidR |
| P76245 | ampm_ecoli | yeap_ecoli | map  | yeaP |
| P0AGK4 | ampm_ecoli | yhby_ecoli | map  | yhby |
|        |            |            |      |      |
| P0A6F5 | ampn_ecoli | ch60_ecoli | pepN | groL |
| P77329 | ampn_ecoli | hyfg_ecoli | pepN | hyfG |
| P0AA43 | ampn_ecoli | rsua_ecoli | pepN | rsuA |
| P42592 | ampn_ecoli | ygjk_ecoli | pepN | ygjK |
|        |            |            |      |      |
| P45568 | apt_ecoli  | dxr_ecoli  | apt  | dxr  |
| P0C8J8 | apt_ecoli  | gatz_ecoli | apt  | gatz |
| P0AF06 | apt_ecoli  | motb_ecoli | apt  | motB |
|        |            |            |      |      |
| P0A717 | arca_ecoli | kprs_ecoli | arcA | prs  |
|        |            |            |      |      |
| P0A6F5 | arob_ecoli | ch60_ecoli | aroB | groL |
| P0AAJ3 | arob_ecoli | fdnh_ecoli | aroB | fdnH |
| P39369 | arob_ecoli | yjhr_ecoli | aroB | yjhR |
|        |            |            |      |      |
| P18843 | aroe_ecoli | nade_ecoli | aroE | nadE |
| P31064 | aroe_ecoli | yede_ecoli | aroE | yedE |
| P45545 | aroe_ecoli | yhfs_ecoli | aroE | yhfs |
|        |            |            |      |      |
| P0ADY3 | arom_ecoli | rl14_ecoli | aroM | rplN |
| P0A7M2 | arom_ecoli | rl28_ecoli | aroM | rpmB |
| P0A8D3 | arom_ecoli | yaii_ecoli | aroM | yaiI |

|        |             |             |      |       |
|--------|-------------|-------------|------|-------|
| P23721 | asna_ecoli  | serc_ecoli  | asnA | serC  |
| P31658 | asnc_ecoli  | hcha_ecoli  | asnC | hchA  |
| P37246 | aspg2_ecoli | insi_ecoli  | ansB | insI1 |
| P25535 | aspg2_ecoli | visc_ecoli  | ansB | visC  |
| P0ABB4 | atpa_ecoli  | atpb_ecoli  | atpA | atpD  |
| P0ABB4 | atpa_ecoli  | atpb_ecoli  | atpA | atpD  |
| P0ABB4 | atpa_ecoli  | atpb_ecoli  | atpA | atpD  |
| P0ABB4 | atpa_ecoli  | atpb_ecoli  | atpA | atpD  |
| P0ABB4 | atpa_ecoli  | atpb_ecoli  | atpA | atpD  |
| P0ABA0 | atpa_ecoli  | atpf_ecoli  | atpA | atpF  |
| P0ABA6 | atpa_ecoli  | atpg_ecoli  | atpA | atpG  |
| P0ABA6 | atpa_ecoli  | atpg_ecoli  | atpA | atpG  |
| P68699 | atpa_ecoli  | atpl_ecoli  | atpA | atpE  |
| P0A6J5 | atpa_ecoli  | dada_ecoli  | atpA | dadA  |
| P0A6J5 | atpa_ecoli  | dada_ecoli  | atpA | dadA  |
| P0ACC7 | atpa_ecoli  | glmu_ecoli  | atpA | glmU  |
| P37095 | atpa_ecoli  | pepb_ecoli  | atpA | pepB  |
| P0A7E1 | atpa_ecoli  | pyrd_ecoli  | atpA | pyrD  |
| P0A7E1 | atpa_ecoli  | pyrd_ecoli  | atpA | pyrD  |
| P0A7L0 | atpa_ecoli  | rl1_ecoli   | atpA | rplA  |
| P0A7R1 | atpa_ecoli  | rl9_ecoli   | atpA | rplI  |
| P37744 | atpa_ecoli  | rmla1_ecoli | atpA | rmlA1 |
| P0ABB0 | atpb_ecoli  | atpa_ecoli  | atpD | atpA  |
| P0ABB0 | atpb_ecoli  | atpa_ecoli  | atpD | atpA  |
| P0A9A6 | atpb_ecoli  | ftsz_ecoli  | atpD | ftsZ  |
| P13035 | atpb_ecoli  | glpd_ecoli  | atpD | glpD  |
| P0A7G6 | atpb_ecoli  | reca_ecoli  | atpD | recA  |
| P0AG30 | atpb_ecoli  | rho_ecoli   | atpD | rho   |
| P62399 | atpb_ecoli  | rl5_ecoli   | atpD | rplE  |
| P0AG55 | atpb_ecoli  | rl6_ecoli   | atpD | rplF  |
| P0A7V0 | atpb_ecoli  | rs2_ecoli   | atpD | rpsB  |
| P0ABB0 | atpg_ecoli  | atpa_ecoli  | atpG | atpA  |
| P0ABB0 | atpg_ecoli  | atpa_ecoli  | atpG | atpA  |
| P0ABB4 | atpg_ecoli  | atpb_ecoli  | atpG | atpD  |
| P0A6E6 | atpg_ecoli  | atpe_ecoli  | atpG | atpC  |
| P0A6E6 | atpg_ecoli  | atpe_ecoli  | atpG | atpC  |

|        |                            |                             |      |       |
|--------|----------------------------|-----------------------------|------|-------|
| P0ADZ0 | <a href="#">atpg_ecoli</a> | <a href="#">rl23_ecoli</a>  | atpG | rpIW  |
| P63284 | <a href="#">atzn_ecoli</a> | <a href="#">clpb_ecoli</a>  | zntA | clpB  |
| P15031 | <a href="#">atzn_ecoli</a> | <a href="#">fece_ecoli</a>  | zntA | fecE  |
| P09831 | <a href="#">atzn_ecoli</a> | <a href="#">gltb_ecoli</a>  | zntA | gltB  |
| P0A9M0 | <a href="#">atzn_ecoli</a> | <a href="#">lon_ecoli</a>   | zntA | lon   |
| P0A870 | <a href="#">atzn_ecoli</a> | <a href="#">talb_ecoli</a>  | zntA | talB  |
| P27836 | <a href="#">atzn_ecoli</a> | <a href="#">wecg_ecoli</a>  | zntA | wecG  |
| P76344 | <a href="#">atzn_ecoli</a> | <a href="#">yoda_ecoli</a>  | zntA | yodA  |
| P0A717 | <a href="#">basr_ecoli</a> | <a href="#">kprs_ecoli</a>  | basR | prs   |
| P0AA43 | <a href="#">basr_ecoli</a> | <a href="#">rsua_ecoli</a>  | basR | rsuA  |
| P15082 | <a href="#">basr_ecoli</a> | <a href="#">srlr_ecoli</a>  | basR | srlR  |
| P76177 | <a href="#">basr_ecoli</a> | <a href="#">ydgh_ecoli</a>  | basR | ydgH  |
| P05194 | <a href="#">bcp_ecoli</a>  | <a href="#">arod_ecoli</a>  | bcp  | aroD  |
| P0A9F3 | <a href="#">bcp_ecoli</a>  | <a href="#">cysb_ecoli</a>  | bcp  | cysB  |
| P08409 | <a href="#">bcp_ecoli</a>  | <a href="#">insl_ecoli</a>  | bcp  | insL1 |
| P08409 | <a href="#">bcp_ecoli</a>  | <a href="#">insl_ecoli</a>  | bcp  | insL1 |
| P18843 | <a href="#">bcp_ecoli</a>  | <a href="#">nade_ecoli</a>  | bcp  | nadE  |
| P39406 | <a href="#">bcp_ecoli</a>  | <a href="#">rsmc_ecoli</a>  | bcp  | rsmC  |
| P0A8N0 | <a href="#">bcp_ecoli</a>  | <a href="#">ycbg_ecoli</a>  | bcp  | ycbG  |
| P08394 | <a href="#">betb_ecoli</a> | <a href="#">ex5b_ecoli</a>  | betB | recB  |
| P0ACB4 | <a href="#">betb_ecoli</a> | <a href="#">hemg_ecoli</a>  | betB | hemG  |
| P16690 | <a href="#">betb_ecoli</a> | <a href="#">phnn_ecoli</a>  | betB | phnN  |
| P16916 | <a href="#">betb_ecoli</a> | <a href="#">rhsa_ecoli</a>  | betB | rhsA  |
| P0A948 | <a href="#">betb_ecoli</a> | <a href="#">rimj_ecoli</a>  | betB | rimJ  |
| P37765 | <a href="#">betb_ecoli</a> | <a href="#">rlub_ecoli</a>  | betB | rluB  |
| P50456 | <a href="#">bfr_ecoli</a>  | <a href="#">mlc_ecoli</a>   | bfr  | mlc   |
| P08373 | <a href="#">bfr_ecoli</a>  | <a href="#">murb_ecoli</a>  | bfr  | murB  |
| P10443 | <a href="#">bgla_ecoli</a> | <a href="#">dpo3a_ecoli</a> | bgIA | dnaE  |
| P18843 | <a href="#">bgla_ecoli</a> | <a href="#">nade_ecoli</a>  | bgIA | nadE  |

|        |                            |                             |      |      |
|--------|----------------------------|-----------------------------|------|------|
| P0A6F5 | <a href="#">bioa_ecoli</a> | <a href="#">ch60_ecoli</a>  | bioA | groL |
| P10443 | <a href="#">bioa_ecoli</a> | <a href="#">dpo3a_ecoli</a> | bioA | dnaE |
| P0A717 | <a href="#">bioa_ecoli</a> | <a href="#">kprs_ecoli</a>  | bioA | prs  |
| P33602 | <a href="#">bioa_ecoli</a> | <a href="#">nuog_ecoli</a>  | bioA | nuoG |

|        |                            |                            |      |      |
|--------|----------------------------|----------------------------|------|------|
| P0A6Y8 | <a href="#">biob_ecoli</a> | <a href="#">dnak_ecoli</a> | bioB | dnaK |
| P18843 | <a href="#">biob_ecoli</a> | <a href="#">nade_ecoli</a> | bioB | nadE |

|        |                            |                            |      |      |
|--------|----------------------------|----------------------------|------|------|
| P0A6F5 | <a href="#">bioh_ecoli</a> | <a href="#">ch60_ecoli</a> | bioH | groL |
| P0AC53 | <a href="#">bioh_ecoli</a> | <a href="#">g6pd_ecoli</a> | bioH | zwf  |
| P0AFG6 | <a href="#">bioh_ecoli</a> | <a href="#">odo2_ecoli</a> | bioH | sucB |

|        |                            |                            |      |      |
|--------|----------------------------|----------------------------|------|------|
| P0A6F5 | <a href="#">btue_ecoli</a> | <a href="#">ch60_ecoli</a> | btuE | groL |
| P08622 | <a href="#">btue_ecoli</a> | <a href="#">dnaj_ecoli</a> | btuE | dnaJ |
| P0A8J2 | <a href="#">btue_ecoli</a> | <a href="#">dnat_ecoli</a> | btuE | dnaT |
| P0AD68 | <a href="#">btue_ecoli</a> | <a href="#">ftsi_ecoli</a> | btuE | ftsl |
| P75958 | <a href="#">btue_ecoli</a> | <a href="#">lole_ecoli</a> | btuE | lolE |
| P18843 | <a href="#">btue_ecoli</a> | <a href="#">nade_ecoli</a> | btuE | nadE |
| P60422 | <a href="#">btue_ecoli</a> | <a href="#">rl2_ecoli</a>  | btuE | rplB |
| P62399 | <a href="#">btue_ecoli</a> | <a href="#">rl5_ecoli</a>  | btuE | rplE |
| P0A7V0 | <a href="#">btue_ecoli</a> | <a href="#">rs2_ecoli</a>  | btuE | rpsB |
| P0A7V3 | <a href="#">btue_ecoli</a> | <a href="#">rs3_ecoli</a>  | btuE | rpsC |
| P0A7W1 | <a href="#">btue_ecoli</a> | <a href="#">rs5_ecoli</a>  | btuE | rpsE |
| P21363 | <a href="#">btue_ecoli</a> | <a href="#">ycie_ecoli</a> | btuE | yciE |
| P76121 | <a href="#">btue_ecoli</a> | <a href="#">yddh_ecoli</a> | btuE | yddH |
| P52043 | <a href="#">btue_ecoli</a> | <a href="#">ygfH_ecoli</a> | btuE | ygfH |
| P67601 | <a href="#">btue_ecoli</a> | <a href="#">yobd_ecoli</a> | btuE | yobD |

|        |                            |                            |      |      |
|--------|----------------------------|----------------------------|------|------|
| P0AC41 | <a href="#">caib_ecoli</a> | <a href="#">dhsa_ecoli</a> | caiB | sdhA |
| P06149 | <a href="#">caib_ecoli</a> | <a href="#">dld_ecoli</a>  | caiB | dld  |
| P16916 | <a href="#">caib_ecoli</a> | <a href="#">rhsa_ecoli</a> | caiB | rhsA |
| P16919 | <a href="#">caib_ecoli</a> | <a href="#">rhds_ecoli</a> | caiB | rhsD |

|        |                            |                            |      |      |
|--------|----------------------------|----------------------------|------|------|
| P0A6F5 | <a href="#">cate_ecoli</a> | <a href="#">ch60_ecoli</a> | katE | groL |
| P08394 | <a href="#">cate_ecoli</a> | <a href="#">ex5b_ecoli</a> | katE | recB |
| P0A9A9 | <a href="#">cate_ecoli</a> | <a href="#">fur_ecoli</a>  | katE | fur  |
| P27249 | <a href="#">cate_ecoli</a> | <a href="#">glnD_ecoli</a> | katE | glnD |
| P30015 | <a href="#">cate_ecoli</a> | <a href="#">lhr_ecoli</a>  | katE | lhr  |
| P24174 | <a href="#">cate_ecoli</a> | <a href="#">manc_ecoli</a> | katE | manC |
| P75864 | <a href="#">cate_ecoli</a> | <a href="#">rlmI_ecoli</a> | katE | rlmL |

|        |            |             |      |      |
|--------|------------|-------------|------|------|
| P76148 | cate_ecoli | yneg_ecoli  | katE | yneG |
| P33224 | cbpa_ecoli | aidb_ecoli  | cbpA | aidB |
| P0A6F5 | cbpa_ecoli | ch60_ecoli  | cbpA | groL |
| P0ABH9 | cbpa_ecoli | clpa_ecoli  | cbpA | clpA |
| P63284 | cbpa_ecoli | clpb_ecoli  | cbpA | clpB |
| P0A9P6 | cbpa_ecoli | dead_ecoli  | cbpA | deaD |
| P0A6Y8 | cbpa_ecoli | dnak_ecoli  | cbpA | dnaK |
| P0A6Y8 | cbpa_ecoli | dnak_ecoli  | cbpA | dnaK |
| P0A6Y8 | cbpa_ecoli | dnak_ecoli  | cbpA | dnaK |
| P0CE47 | cbpa_ecoli | eftu1_ecoli | cbpA | tufA |
| P0A6Q6 | cbpa_ecoli | fabz_ecoli  | cbpA | fabZ |
| P0A6Z1 | cbpa_ecoli | hsca_ecoli  | cbpA | hscA |
| P0A707 | cbpa_ecoli | if3_ecoli   | cbpA | infC |
| P0A9M0 | cbpa_ecoli | lon_ecoli   | cbpA | lon  |
| P0A817 | cbpa_ecoli | metk_ecoli  | cbpA | metK |
| P22523 | cbpa_ecoli | mukb_ecoli  | cbpA | mukB |
| P18843 | cbpa_ecoli | nade_ecoli  | cbpA | nadE |
| P42184 | cbpa_ecoli | prsa_ecolx  | cbpA | prsA |
| P0A9J6 | cbpa_ecoli | rbsk_ecoli  | cbpA | rbsK |
| P0AG30 | cbpa_ecoli | rho_ecoli   | cbpA | rho  |
| P0A7L0 | cbpa_ecoli | rl1_ecoli   | cbpA | rplA |
| P0A7K6 | cbpa_ecoli | rl19_ecoli  | cbpA | rplS |
| P60422 | cbpa_ecoli | rl2_ecoli   | cbpA | rplB |
| P60422 | cbpa_ecoli | rl2_ecoli   | cbpA | rplB |
| P61175 | cbpa_ecoli | rl22_ecoli  | cbpA | rplV |
| P60624 | cbpa_ecoli | rl24_ecoli  | cbpA | rplX |
| P0A7M6 | cbpa_ecoli | rl29_ecoli  | cbpA | rpmC |
| P60438 | cbpa_ecoli | rl3_ecoli   | cbpA | rplC |
| P0A7N9 | cbpa_ecoli | rl33_ecoli  | cbpA | rpmG |
| P60723 | cbpa_ecoli | rl4_ecoli   | cbpA | rplD |
| P60723 | cbpa_ecoli | rl4_ecoli   | cbpA | rplD |
| P62399 | cbpa_ecoli | rl5_ecoli   | cbpA | rplE |
| P0AG55 | cbpa_ecoli | rl6_ecoli   | cbpA | rplF |
| P0A7K2 | cbpa_ecoli | rl7_ecoli   | cbpA | rplL |
| P0A7R1 | cbpa_ecoli | rl9_ecoli   | cbpA | rplI |
| P0A8T7 | cbpa_ecoli | rpoc_ecoli  | cbpA | rpoC |
| P0AG67 | cbpa_ecoli | rs1_ecoli   | cbpA | rpsA |
| P0A7S9 | cbpa_ecoli | rs13_ecoli  | cbpA | rpsM |
| P0A7T3 | cbpa_ecoli | rs16_ecoli  | cbpA | rpsP |
| P0A7V0 | cbpa_ecoli | rs2_ecoli   | cbpA | rpsB |
| P0A7V0 | cbpa_ecoli | rs2_ecoli   | cbpA | rpsB |
| P0A7V3 | cbpa_ecoli | rs3_ecoli   | cbpA | rpsC |
| P0A7V8 | cbpa_ecoli | rs4_ecoli   | cbpA | rpsD |
| P0A7W1 | cbpa_ecoli | rs5_ecoli   | cbpA | rpsE |

|        |                            |                            |      |      |
|--------|----------------------------|----------------------------|------|------|
| P02359 | <a href="#">cbpa_ecoli</a> | <a href="#">rs7_ecoli</a>  | cbpA | rpsG |
| P02359 | <a href="#">cbpa_ecoli</a> | <a href="#">rs7_ecoli</a>  | cbpA | rpsG |
| P21507 | <a href="#">cbpa_ecoli</a> | <a href="#">srmb_ecoli</a> | cbpA | srmB |
| P45531 | <a href="#">cbpa_ecoli</a> | <a href="#">tusc_ecoli</a> | cbpA | tusC |
| P0AG80 | <a href="#">cbpa_ecoli</a> | <a href="#">ugpb_ecoli</a> | cbpA | ugpB |
| P77625 | <a href="#">cbpa_ecoli</a> | <a href="#">yfbt_ecoli</a> | cbpA | yfbT |
| P30871 | <a href="#">cbpa_ecoli</a> | <a href="#">ygif_ecoli</a> | cbpA | ygiF |
| P39279 | <a href="#">cbpa_ecoli</a> | <a href="#">yjej_ecoli</a> | cbpA | yjeJ |
| P39293 | <a href="#">cbpa_ecoli</a> | <a href="#">yjfk_ecoli</a> | cbpA | yjfK |

|        |                           |                            |     |      |
|--------|---------------------------|----------------------------|-----|------|
| P13024 | <a href="#">cdh_ecoli</a> | <a href="#">fdhe_ecoli</a> | cdh | fdhE |
| P00393 | <a href="#">cdh_ecoli</a> | <a href="#">dhna_ecoli</a> | cdh | ndh  |

|        |                            |                            |     |      |
|--------|----------------------------|----------------------------|-----|------|
| P11899 | <a href="#">cead_ecolx</a> | <a href="#">immd_ecoli</a> | cda | cdi  |
| P37024 | <a href="#">cfa_ecoli</a>  | <a href="#">hrpb_ecoli</a> | cfa | hrpB |

|        |                            |                            |      |      |
|--------|----------------------------|----------------------------|------|------|
| P0A6Y8 | <a href="#">ch10_ecoli</a> | <a href="#">dnak_ecoli</a> | groS | dnaK |
| P0A6Y8 | <a href="#">ch10_ecoli</a> | <a href="#">dnak_ecoli</a> | groS | dnaK |
| P0A6M8 | <a href="#">ch10_ecoli</a> | <a href="#">efg_ecoli</a>  | groS | fusA |
| P0AEL6 | <a href="#">ch10_ecoli</a> | <a href="#">fepb_ecoli</a> | groS | fepB |
| P0A6V5 | <a href="#">ch10_ecoli</a> | <a href="#">glpe_ecoli</a> | groS | glpE |
| P67910 | <a href="#">ch10_ecoli</a> | <a href="#">hldd_ecoli</a> | groS | hldD |
| P67910 | <a href="#">ch10_ecoli</a> | <a href="#">hldd_ecoli</a> | groS | hldD |
| P0A6Z3 | <a href="#">ch10_ecoli</a> | <a href="#">htpg_ecoli</a> | groS | htpG |
| P0AEX9 | <a href="#">ch10_ecoli</a> | <a href="#">male_ecoli</a> | groS | malE |
| P0AEX9 | <a href="#">ch10_ecoli</a> | <a href="#">male_ecoli</a> | groS | malE |
| P0AEZ3 | <a href="#">ch10_ecoli</a> | <a href="#">mind_ecoli</a> | groS | minD |
| P0A9X4 | <a href="#">ch10_ecoli</a> | <a href="#">mreb_ecoli</a> | groS | mreB |
| P18843 | <a href="#">ch10_ecoli</a> | <a href="#">nade_ecoli</a> | groS | nadE |
| P0A772 | <a href="#">ch10_ecoli</a> | <a href="#">nrld_ecoli</a> | groS | nrld |
| P0A9K9 | <a href="#">ch10_ecoli</a> | <a href="#">slyd_ecoli</a> | groS | slyD |
| P76194 | <a href="#">ch10_ecoli</a> | <a href="#">sufe_ecoli</a> | groS | sufE |
| P0A850 | <a href="#">ch10_ecoli</a> | <a href="#">tig_ecoli</a>  | groS | tig  |



|        |            |             |      |       |
|--------|------------|-------------|------|-------|
| P0A850 | ch10_ecoli | tig_ecoli   | groS | tig   |
| P77504 | ch10_ecoli | ybbp_ecoli  | groS | ybbP  |
| P63284 | ch60_ecoli | clpb_ecoli  | groL | clpB  |
| P0A6Y8 | ch60_ecoli | dnak_ecoli  | groL | dnaK  |
| P0C8J6 | ch60_ecoli | gaty_ecoli  | groL | gatY  |
| P0A6V5 | ch60_ecoli | glpe_ecoli  | groL | glpE  |
| P09372 | ch60_ecoli | grpe_ecoli  | groL | grpE  |
| P0A9M0 | ch60_ecoli | lon_ecoli   | groL | lon   |
| P0AEX9 | ch60_ecoli | male_ecoli  | groL | maleE |
| P0AEX9 | ch60_ecoli | male_ecoli  | groL | maleE |
| P0AEX9 | ch60_ecoli | male_ecoli  | groL | maleE |
| P61889 | ch60_ecoli | mdh_ecoli   | groL | mdh   |
| P09152 | ch60_ecoli | narg_ecoli  | groL | narG  |
| P33602 | ch60_ecoli | nuog_ecoli  | groL | nuoG  |
| P0A7E1 | ch60_ecoli | pyrd_ecoli  | groL | pyrD  |
| P16916 | ch60_ecoli | rhsa_ecoli  | groL | rhsA  |
| P0A8T7 | ch60_ecoli | rpoc_ecoli  | groL | rpoC  |
| P0AFR0 | ch60_ecoli | rssa_ecoli  | groL | rssA  |
| P0A850 | ch60_ecoli | tig_ecoli   | groL | tig   |
| P39177 | ch60_ecoli | uspg_ecoli  | groL | uspG  |
| P77395 | ch60_ecoli | ybbn_ecoli  | groL | ybbN  |
| P76010 | ch60_ecoli | ycgr_ecoli  | groL | ycgR  |
| P28638 | ch60_ecoli | yhdj_ecoli  | groL | yhdJ  |
| P0ADK6 | ch60_ecoli | yiba_ecoli  | groL | yibA  |
| P39288 | ch60_ecoli | yjes_ecoli  | groL | yjeS  |
| P0A6F5 | cisy_ecoli | ch60_ecoli  | gltA | groL  |
| P0AD61 | cisy_ecoli | kpyk1_ecoli | gltA | pykF  |
| P77188 | cisy_ecoli | matc_ecoli  | gltA | matC  |
| P18843 | cisy_ecoli | nade_ecoli  | gltA | nadE  |
| P0A6F5 | citc_ecoli | ch60_ecoli  | citC | groL  |
| P0A6G5 | citc_ecoli | citx_ecoli  | citC | citX  |
| P27296 | citc_ecoli | ding_ecoli  | citC | dinG  |
| P0A9M0 | citc_ecoli | lon_ecoli   | citC | lon   |
| P16918 | citc_ecoli | rhsc_ecoli  | citC | rhcC  |
| P0AEC5 | clpa_ecoli | bara_ecoli  | clpA | barA  |
| P0AE67 | clpa_ecoli | chey_ecoli  | clpA | cheY  |
| P0A8Q6 | clpa_ecoli | clps_ecoli  | clpA | clpS  |
| P0A8Q6 | clpa_ecoli | clps_ecoli  | clpA | clpS  |
| P0A8Q6 | clpa_ecoli | clps_ecoli  | clpA | clpS  |

|        |            |             |      |       |
|--------|------------|-------------|------|-------|
| P0A8Q6 | clpa_ecoli | clps_ecoli  | clpA | clpS  |
| P0A8Q6 | clpa_ecoli | clps_ecoli  | clpA | clpS  |
| P0A6Y8 | clpa_ecoli | dnak_ecoli  | clpA | dnaK  |
| P0CE47 | clpa_ecoli | eftu1_ecoli | clpA | tufA  |
| P0AAJ3 | clpa_ecoli | fdnh_ecoli  | clpA | fdnH  |
| P06971 | clpa_ecoli | fhua_ecoli  | clpA | fhua  |
| P0A9H3 | clpa_ecoli | ldci_ecoli  | clpA | cadA  |
| P22523 | clpa_ecoli | mukb_ecoli  | clpA | mukB  |
| P18843 | clpa_ecoli | nade_ecoli  | clpA | nadE  |
| P0A7B1 | clpa_ecoli | ppk_ecoli   | clpA | ppk   |
| P14175 | clpa_ecoli | prov_ecoli  | clpA | proV  |
| P15254 | clpa_ecoli | pur4_ecoli  | clpA | purL  |
| P0AG30 | clpa_ecoli | rho_ecoli   | clpA | rho   |
| P0AG30 | clpa_ecoli | rho_ecoli   | clpA | rho   |
| P16918 | clpa_ecoli | rhsc_ecoli  | clpA | rhcC  |
| P0A7J3 | clpa_ecoli | rl10_ecoli  | clpA | rplJ  |
| P0AA10 | clpa_ecoli | rl13_ecoli  | clpA | rplM  |
| P0AG44 | clpa_ecoli | rl17_ecoli  | clpA | rplQ  |
| P0C018 | clpa_ecoli | rl18_ecoli  | clpA | rplR  |
| P60422 | clpa_ecoli | rl2_ecoli   | clpA | rplB  |
| P0AG48 | clpa_ecoli | rl21_ecoli  | clpA | rplU  |
| P0A7L8 | clpa_ecoli | rl27_ecoli  | clpA | rpmA  |
| P0A7M6 | clpa_ecoli | rl29_ecoli  | clpA | rpmC  |
| P60438 | clpa_ecoli | rl3_ecoli   | clpA | rplC  |
| P0A7N9 | clpa_ecoli | rl33_ecoli  | clpA | rpmG  |
| P60723 | clpa_ecoli | rl4_ecoli   | clpA | rplD  |
| P62399 | clpa_ecoli | rl5_ecoli   | clpA | rplE  |
| P0A7K2 | clpa_ecoli | rl7_ecoli   | clpA | rplL  |
| P0A7R1 | clpa_ecoli | rl9_ecoli   | clpA | rplI  |
| P0A8V2 | clpa_ecoli | rpob_ecoli  | clpA | rpoB  |
| P0A8T7 | clpa_ecoli | rpoc_ecoli  | clpA | rpoC  |
| P0AG67 | clpa_ecoli | rs1_ecoli   | clpA | rpsA  |
| P0AG67 | clpa_ecoli | rs1_ecoli   | clpA | rpsA  |
| P0A7R5 | clpa_ecoli | rs10_ecoli  | clpA | rpsJ  |
| P0AG59 | clpa_ecoli | rs14_ecoli  | clpA | rpsN  |
| P0A7T3 | clpa_ecoli | rs16_ecoli  | clpA | rpsP  |
| P0A7V0 | clpa_ecoli | rs2_ecoli   | clpA | rpsB  |
| P0A7V0 | clpa_ecoli | rs2_ecoli   | clpA | rpsB  |
| P68679 | clpa_ecoli | rs21_ecoli  | clpA | rpsU  |
| P0A7V8 | clpa_ecoli | rs4_ecoli   | clpA | rpsD  |
| P02358 | clpa_ecoli | rs6_ecoli   | clpA | rpsF  |
| P02359 | clpa_ecoli | rs7_ecoli   | clpA | rpsG  |
| P02359 | clpa_ecoli | rs7_ecoli   | clpA | rpsG  |
| P13458 | clpa_ecoli | sbcc_ecoli  | clpA | sbccC |
| P10408 | clpa_ecoli | seca_ecoli  | clpA | secA  |

|        |                            |                             |      |      |
|--------|----------------------------|-----------------------------|------|------|
| P0AG24 | <a href="#">clpa_ecoli</a> | <a href="#">spot_ecoli</a>  | clpA | spoT |
| P0AAQ6 | <a href="#">clpa_ecoli</a> | <a href="#">ybaa_ecoli</a>  | clpA | ybaA |
| P75826 | <a href="#">clpa_ecoli</a> | <a href="#">ybje_ecoli</a>  | clpA | ybjE |
| P08245 | <a href="#">clpa_ecoli</a> | <a href="#">ycih_ecoli</a>  | clpA | yciH |
| P30871 | <a href="#">clpa_ecoli</a> | <a href="#">ygif_ecoli</a>  | clpA | ygiF |
| P0AGK4 | <a href="#">clpa_ecoli</a> | <a href="#">yhby_ecoli</a>  | clpA | yhbY |
|        |                            |                             |      |      |
| P00722 | <a href="#">clpb_ecoli</a> | <a href="#">bgal_ecoli</a>  | clpB | lacZ |
| P0ABL8 | <a href="#">clpb_ecoli</a> | <a href="#">ccmb_ecoli</a>  | clpB | ccmB |
| P0AC41 | <a href="#">clpb_ecoli</a> | <a href="#">dhsa_ecoli</a>  | clpB | sdhA |
| P0A6Y8 | <a href="#">clpb_ecoli</a> | <a href="#">dnak_ecoli</a>  | clpB | dnaK |
| P0CE47 | <a href="#">clpb_ecoli</a> | <a href="#">eftu1_ecoli</a> | clpB | tufA |
| P30855 | <a href="#">clpb_ecoli</a> | <a href="#">evgs_ecoli</a>  | clpB | evgS |
| P75884 | <a href="#">clpb_ecoli</a> | <a href="#">gfcB_ecoli</a>  | clpB | gfcB |
| P0A705 | <a href="#">clpb_ecoli</a> | <a href="#">if2_ecoli</a>   | clpB | infB |
| P37005 | <a href="#">clpb_ecoli</a> | <a href="#">last_ecoli</a>  | clpB | lasT |
| P37330 | <a href="#">clpb_ecoli</a> | <a href="#">masz_ecoli</a>  | clpB | glcB |
| P18843 | <a href="#">clpb_ecoli</a> | <a href="#">nade_ecoli</a>  | clpB | nadE |
| P0AFJ5 | <a href="#">clpb_ecoli</a> | <a href="#">phob_ecoli</a>  | clpB | phoB |
| P37177 | <a href="#">clpb_ecoli</a> | <a href="#">pt1p_ecoli</a>  | clpB | ptsP |
| P69829 | <a href="#">clpb_ecoli</a> | <a href="#">ptsn_ecoli</a>  | clpB | ptsN |
| P09546 | <a href="#">clpb_ecoli</a> | <a href="#">puta_ecoli</a>  | clpB | putA |
| P0AA10 | <a href="#">clpb_ecoli</a> | <a href="#">rl13_ecoli</a>  | clpB | rplM |
| P60422 | <a href="#">clpb_ecoli</a> | <a href="#">rl2_ecoli</a>   | clpB | rplB |
| P0AG48 | <a href="#">clpb_ecoli</a> | <a href="#">rl21_ecoli</a>  | clpB | rplU |
| P61175 | <a href="#">clpb_ecoli</a> | <a href="#">rl22_ecoli</a>  | clpB | rplV |
| P0A7M6 | <a href="#">clpb_ecoli</a> | <a href="#">rl29_ecoli</a>  | clpB | rpmC |
| P60438 | <a href="#">clpb_ecoli</a> | <a href="#">rl3_ecoli</a>   | clpB | rplC |
| P0A8V0 | <a href="#">clpb_ecoli</a> | <a href="#">rnz_ecoli</a>   | clpB | rnz  |
| P0AG67 | <a href="#">clpb_ecoli</a> | <a href="#">rs1_ecoli</a>   | clpB | rpsA |
| P0A7R5 | <a href="#">clpb_ecoli</a> | <a href="#">rs10_ecoli</a>  | clpB | rpsJ |
| P0AG59 | <a href="#">clpb_ecoli</a> | <a href="#">rs14_ecoli</a>  | clpB | rpsN |
| P0A7V0 | <a href="#">clpb_ecoli</a> | <a href="#">rs2_ecoli</a>   | clpB | rpsB |
| P02359 | <a href="#">clpb_ecoli</a> | <a href="#">rs7_ecoli</a>   | clpB | rpsG |
| P0A7W7 | <a href="#">clpb_ecoli</a> | <a href="#">rs8_ecoli</a>   | clpB | rpsH |
| P0AGH5 | <a href="#">clpb_ecoli</a> | <a href="#">sapc_ecoli</a>  | clpB | sapC |
| P00957 | <a href="#">clpb_ecoli</a> | <a href="#">sya_ecoli</a>   | clpB | alaS |
| P30139 | <a href="#">clpb_ecoli</a> | <a href="#">thig_ecoli</a>  | clpB | thiG |
| Q47706 | <a href="#">clpb_ecoli</a> | <a href="#">uidc_ecoli</a>  | clpB | uidC |
| P39306 | <a href="#">clpb_ecoli</a> | <a href="#">ulaf_ecoli</a>  | clpB | ulaF |
| P77694 | <a href="#">clpb_ecoli</a> | <a href="#">yagw_ecoli</a>  | clpB | yagW |
| P77561 | <a href="#">clpb_ecoli</a> | <a href="#">ydep_ecoli</a>  | clpB | ydeP |
| P0ADE6 | <a href="#">clpb_ecoli</a> | <a href="#">ygau_ecoli</a>  | clpB | ygaU |
| P45546 | <a href="#">clpb_ecoli</a> | <a href="#">yhft_ecoli</a>  | clpB | yhfT |
| P32689 | <a href="#">clpb_ecoli</a> | <a href="#">yjbh_ecoli</a>  | clpB | yjbH |

|        |            |            |      |      |
|--------|------------|------------|------|------|
| P0ABL5 | cmoa_ecoli | napc_ecoli | cmoA | napC |
| P0A814 | cmoa_ecoli | ruvc_ecoli | cmoA | ruvC |
| P75856 | cmoa_ecoli | ycbr_ecoli | cmoA | ycbR |

|        |           |            |     |      |
|--------|-----------|------------|-----|------|
| P60438 | crp_ecoli | rl3_ecoli  | crp | rplC |
| P0A7K2 | crp_ecoli | rl7_ecoli  | crp | rplL |
| P0A7R5 | crp_ecoli | rs10_ecoli | crp | rpsJ |
| P0A7W1 | crp_ecoli | rs5_ecoli  | crp | rpsE |

|        |            |            |      |      |
|--------|------------|------------|------|------|
| P0ABD5 | cspc_ecoli | acca_ecoli | cspC | accA |
| P0ABD5 | cspc_ecoli | acca_ecoli | cspC | accA |
| P0A9Q5 | cspc_ecoli | accd_ecoli | cspC | accD |
| P33224 | cspc_ecoli | aidb_ecoli | cspC | aidB |
| P33224 | cspc_ecoli | aidb_ecoli | cspC | aidB |
| P0AE88 | cspc_ecoli | cpxr_ecoli | cspC | cpxR |
| P08401 | cspc_ecoli | crec_ecoli | cspC | creC |
| P0A968 | cspc_ecoli | cspd_ecoli | cspC | cspD |
| P0A972 | cspc_ecoli | cspe_ecoli | cspC | cspE |
| P0ACF0 | cspc_ecoli | dbha_ecoli | cspC | hupA |
| P0ACF0 | cspc_ecoli | dbha_ecoli | cspC | hupA |
| P0ACF4 | cspc_ecoli | dbhb_ecoli | cspC | hupB |
| P0A9P6 | cspc_ecoli | dead_ecoli | cspC | deaD |
| P0A9P6 | cspc_ecoli | dead_ecoli | cspC | deaD |
| P08622 | cspc_ecoli | dnaj_ecoli | cspC | dnaJ |
| P36837 | cspc_ecoli | dtpb_ecoli | cspC | dtpB |
| P0ADI4 | cspc_ecoli | entb_ecoli | cspC | entB |
| P30845 | cspc_ecoli | epta_ecoli | cspC | eptA |
| P0A6F3 | cspc_ecoli | glpk_ecoli | cspC | glpK |
| P77334 | cspc_ecoli | gmr_ecoli  | cspC | gmr  |
| P0A6X3 | cspc_ecoli | hfq_ecoli  | cspC | hfq  |
| P0ACF8 | cspc_ecoli | hns_ecoli  | cspC | hns  |
| P43329 | cspc_ecoli | hrpa_ecoli | cspC | hrpA |
| P0A9F9 | cspc_ecoli | metr_ecoli | cspC | metR |
| P18843 | cspc_ecoli | nade_ecoli | cspC | nadE |
| P05055 | cspc_ecoli | pnp_ecoli  | cspC | pnp  |
| P77243 | cspc_ecoli | prpd_ecoli | cspC | prpD |
| P09546 | cspc_ecoli | puta_ecoli | cspC | putA |
| P69407 | cspc_ecoli | rccb_ecoli | cspC | rccb |

|        |            |            |      |      |
|--------|------------|------------|------|------|
| P05824 | cspc_ecoli | recn_ecoli | cspC | recN |
| P27129 | cspc_ecoli | rfaj_ecoli | cspC | rfaj |
| P25888 | cspc_ecoli | rhle_ecoli | cspC | rhIE |
| P0AG30 | cspc_ecoli | rho_ecoli  | cspC | rho  |
| P0AG30 | cspc_ecoli | rho_ecoli  | cspC | rho  |
| P0A7L0 | cspc_ecoli | rl1_ecoli  | cspC | rpIA |
| P0A7L0 | cspc_ecoli | rl1_ecoli  | cspC | rpIA |
| P0A7L0 | cspc_ecoli | rl1_ecoli  | cspC | rpIA |
| P0AA10 | cspc_ecoli | rl13_ecoli | cspC | rpIM |
| P0AA10 | cspc_ecoli | rl13_ecoli | cspC | rpIM |
| P0C018 | cspc_ecoli | rl18_ecoli | cspC | rpIR |
| P0A7K6 | cspc_ecoli | rl19_ecoli | cspC | rpIS |
| P60422 | cspc_ecoli | rl2_ecoli  | cspC | rpIB |
| P60422 | cspc_ecoli | rl2_ecoli  | cspC | rpIB |
| P60422 | cspc_ecoli | rl2_ecoli  | cspC | rpIB |
| P0AG48 | cspc_ecoli | rl21_ecoli | cspC | rpIU |
| P61175 | cspc_ecoli | rl22_ecoli | cspC | rpIV |
| P0ADZ0 | cspc_ecoli | rl23_ecoli | cspC | rpIW |
| P60624 | cspc_ecoli | rl24_ecoli | cspC | rpIX |
| P60438 | cspc_ecoli | rl3_ecoli  | cspC | rpIC |
| P60438 | cspc_ecoli | rl3_ecoli  | cspC | rpIC |
| P60723 | cspc_ecoli | rl4_ecoli  | cspC | rpID |
| P60723 | cspc_ecoli | rl4_ecoli  | cspC | rpID |
| P62399 | cspc_ecoli | rl5_ecoli  | cspC | rpIE |
| P62399 | cspc_ecoli | rl5_ecoli  | cspC | rpIE |
| P0A7R1 | cspc_ecoli | rl9_ecoli  | cspC | rpII |
| P75864 | cspc_ecoli | rlml_ecoli | cspC | rlmL |
| P37765 | cspc_ecoli | rlub_ecoli | cspC | rluB |
| P0AA39 | cspc_ecoli | rluc_ecoli | cspC | rluC |
| P75966 | cspc_ecoli | rlue_ecoli | cspC | rluE |
| P21499 | cspc_ecoli | rnrc_ecoli | cspC | rnrc |
| P0AG67 | cspc_ecoli | rs1_ecoli  | cspC | rpsA |
| P0AG67 | cspc_ecoli | rs1_ecoli  | cspC | rpsA |
| P0A7R5 | cspc_ecoli | rs10_ecoli | cspC | rpsJ |
| P0A7S9 | cspc_ecoli | rs13_ecoli | cspC | rpsM |
| P0A7S9 | cspc_ecoli | rs13_ecoli | cspC | rpsM |
| P0AG59 | cspc_ecoli | rs14_ecoli | cspC | rpsN |
| P0A7V0 | cspc_ecoli | rs2_ecoli  | cspC | rpsB |
| P0A7V0 | cspc_ecoli | rs2_ecoli  | cspC | rpsB |
| P0A7U7 | cspc_ecoli | rs20_ecoli | cspC | rpsT |
| P0A7V3 | cspc_ecoli | rs3_ecoli  | cspC | rpsC |
| P0A7V3 | cspc_ecoli | rs3_ecoli  | cspC | rpsC |
| P0A7V8 | cspc_ecoli | rs4_ecoli  | cspC | rpsD |
| P0A7V8 | cspc_ecoli | rs4_ecoli  | cspC | rpsD |
| P0A7V8 | cspc_ecoli | rs4_ecoli  | cspC | rpsD |

|        |            |            |      |      |
|--------|------------|------------|------|------|
| P0A7W1 | cspc_ecoli | rs5_ecoli  | cspC | rpsE |
| P0A7W1 | cspc_ecoli | rs5_ecoli  | cspC | rpsE |
| P02358 | cspc_ecoli | rs6_ecoli  | cspC | rpsF |
| P02359 | cspc_ecoli | rs7_ecoli  | cspC | rpsG |
| P02359 | cspc_ecoli | rs7_ecoli  | cspC | rpsG |
| P02359 | cspc_ecoli | rs7_ecoli  | cspC | rpsG |
| P0A7X3 | cspc_ecoli | rs9_ecoli  | cspC | rpsI |
| P36929 | cspc_ecoli | rsmB_ecoli | cspC | rsmB |
| P06612 | cspc_ecoli | top1_ecoli | cspC | topA |
| P39177 | cspc_ecoli | uspG_ecoli | cspC | uspG |
| P75989 | cspc_ecoli | ycgE_ecoli | cspC | ycgE |
| P76069 | cspc_ecoli | yday_ecoli | cspC | ydaY |
| P76347 | cspc_ecoli | yeeJ_ecoli | cspC | yeeJ |
| P0AGJ5 | cspc_ecoli | yfiF_ecoli | cspC | yfiF |
| P0AGK4 | cspc_ecoli | yhby_ecoli | cspC | yhby |
| P37634 | cspc_ecoli | yhir_ecoli | cspC | yhiR |
| P37634 | cspc_ecoli | yhir_ecoli | cspC | yhiR |
|        |            |            |      |      |
| P0ABD5 | cspd_ecoli | acca_ecoli | cspD | accA |
| P24177 | cspd_ecoli | acrd_ecoli | cspD | acrD |
| P0AC38 | cspd_ecoli | aspa_ecoli | cspD | aspA |
| P0A9Y6 | cspd_ecoli | cspc_ecoli | cspD | cspC |
| P0A9Y6 | cspd_ecoli | cspc_ecoli | cspD | cspC |
| P0A972 | cspd_ecoli | cspe_ecoli | cspD | cspE |
| P0ACF0 | cspd_ecoli | dbha_ecoli | cspD | hupA |
| P0A6J8 | cspd_ecoli | ddlA_ecoli | cspD | ddlA |
| P77308 | cspd_ecoli | ddpb_ecoli | cspD | ddpB |
| P0A9P6 | cspd_ecoli | dead_ecoli | cspD | deaD |
| P0AAG0 | cspd_ecoli | dppd_ecoli | cspD | dppD |
| P0AFG8 | cspd_ecoli | odp1_ecoli | cspD | aceE |
| P05055 | cspd_ecoli | pnp_ecoli  | cspD | pnp  |
| P0AG30 | cspd_ecoli | rho_ecoli  | cspD | rho  |
| P0A7L0 | cspd_ecoli | rl1_ecoli  | cspD | rplA |
| P0AA10 | cspd_ecoli | rl13_ecoli | cspD | rplM |
| P0A7K6 | cspd_ecoli | rl19_ecoli | cspD | rplS |
| P60422 | cspd_ecoli | rl2_ecoli  | cspD | rplB |
| P60624 | cspd_ecoli | rl24_ecoli | cspD | rplX |
| P60438 | cspd_ecoli | rl3_ecoli  | cspD | rplC |
| P60438 | cspd_ecoli | rl3_ecoli  | cspD | rplC |
| P75864 | cspd_ecoli | rlmI_ecoli | cspD | rlmL |
| P37765 | cspd_ecoli | rlub_ecoli | cspD | rluB |
| P0AA39 | cspd_ecoli | rluc_ecoli | cspD | rluC |
| P21499 | cspd_ecoli | rnr_ecoli  | cspD | rnr  |
| P0AG67 | cspd_ecoli | rs1_ecoli  | cspD | rpsA |
| P0A7R5 | cspd_ecoli | rs10_ecoli | cspD | rpsJ |

|        |                            |                            |      |      |
|--------|----------------------------|----------------------------|------|------|
| P0A7S9 | <a href="#">cspd_ecoli</a> | <a href="#">rs13_ecoli</a> | cspD | rpsM |
| P0AG59 | <a href="#">cspd_ecoli</a> | <a href="#">rs14_ecoli</a> | cspD | rpsN |
| P0A7V0 | <a href="#">cspd_ecoli</a> | <a href="#">rs2_ecoli</a>  | cspD | rpsB |
| P0A7V0 | <a href="#">cspd_ecoli</a> | <a href="#">rs2_ecoli</a>  | cspD | rpsB |
| P0A7U7 | <a href="#">cspd_ecoli</a> | <a href="#">rs20_ecoli</a> | cspD | rpsT |
| P68679 | <a href="#">cspd_ecoli</a> | <a href="#">rs21_ecoli</a> | cspD | rpsU |
| P0A7V3 | <a href="#">cspd_ecoli</a> | <a href="#">rs3_ecoli</a>  | cspD | rpsC |
| P0A7V8 | <a href="#">cspd_ecoli</a> | <a href="#">rs4_ecoli</a>  | cspD | rpsD |
| P0A7V8 | <a href="#">cspd_ecoli</a> | <a href="#">rs4_ecoli</a>  | cspD | rpsD |
| P0A7W1 | <a href="#">cspd_ecoli</a> | <a href="#">rs5_ecoli</a>  | cspD | rpsE |
| P0A7W1 | <a href="#">cspd_ecoli</a> | <a href="#">rs5_ecoli</a>  | cspD | rpsE |
| P02359 | <a href="#">cspd_ecoli</a> | <a href="#">rs7_ecoli</a>  | cspD | rpsG |
| P02359 | <a href="#">cspd_ecoli</a> | <a href="#">rs7_ecoli</a>  | cspD | rpsG |
| P0AEU7 | <a href="#">cspd_ecoli</a> | <a href="#">skp_ecoli</a>  | cspD | skp  |
| P25397 | <a href="#">cspd_ecoli</a> | <a href="#">tehb_ecoli</a> | cspD | tehB |
| P0A8A4 | <a href="#">cspd_ecoli</a> | <a href="#">ydia_ecoli</a> | cspD | ydiA |
| P0AGJ5 | <a href="#">cspd_ecoli</a> | <a href="#">yfif_ecoli</a> | cspD | yfiF |

|        |                            |                            |      |      |
|--------|----------------------------|----------------------------|------|------|
| P0ABK2 | <a href="#">cyda_ecoli</a> | <a href="#">cydb_ecoli</a> | cydA | cydB |
| P0ADW3 | <a href="#">cyda_ecoli</a> | <a href="#">yhcb_ecoli</a> | cydA | yhcb |

|        |                            |                            |      |      |
|--------|----------------------------|----------------------------|------|------|
| P0A6Y8 | <a href="#">cyns_ecoli</a> | <a href="#">dnak_ecoli</a> | cynS | dnaK |
| P04425 | <a href="#">cyns_ecoli</a> | <a href="#">gshb_ecoli</a> | cynS | gshB |
| P0A717 | <a href="#">cyns_ecoli</a> | <a href="#">kprs_ecoli</a> | cynS | prs  |

|        |                            |                            |      |      |
|--------|----------------------------|----------------------------|------|------|
| P33195 | <a href="#">cysb_ecoli</a> | <a href="#">gcsp_ecoli</a> | cysB | gcvP |
| P33602 | <a href="#">cysb_ecoli</a> | <a href="#">nuog_ecoli</a> | cysB | nuoG |
| P0A8M3 | <a href="#">cysb_ecoli</a> | <a href="#">syt_ecoli</a>  | cysB | thrS |
| P37626 | <a href="#">cysb_ecoli</a> | <a href="#">yhii_ecoli</a> | cysB | yhil |

|        |                            |                            |      |      |
|--------|----------------------------|----------------------------|------|------|
| P18843 | <a href="#">cysg_ecoli</a> | <a href="#">nade_ecoli</a> | cysG | nadE |
|--------|----------------------------|----------------------------|------|------|

|        |                            |                            |      |      |
|--------|----------------------------|----------------------------|------|------|
| P0A6F5 | <a href="#">cysh_ecoli</a> | <a href="#">ch60_ecoli</a> | cysH | groL |
|--------|----------------------------|----------------------------|------|------|

|        |                            |                            |      |      |
|--------|----------------------------|----------------------------|------|------|
| P0A7J0 | <a href="#">cysj_ecoli</a> | <a href="#">ribb_ecoli</a> | cysJ | ribB |
|--------|----------------------------|----------------------------|------|------|

|        |                            |                            |      |      |
|--------|----------------------------|----------------------------|------|------|
| P06149 | <a href="#">cysk_ecoli</a> | <a href="#">dld_ecoli</a>  | cysK | dld  |
| P77188 | <a href="#">cysk_ecoli</a> | <a href="#">matc_ecoli</a> | cysK | matC |
| P18843 | <a href="#">cysk_ecoli</a> | <a href="#">nade_ecoli</a> | cysK | nadE |
| P16690 | <a href="#">cysk_ecoli</a> | <a href="#">phnn_ecoli</a> | cysK | phnN |
| P60723 | <a href="#">cysk_ecoli</a> | <a href="#">rl4_ecoli</a>  | cysK | rplD |
| P0AGD3 | <a href="#">cysk_ecoli</a> | <a href="#">sodf_ecoli</a> | cysK | sodB |
| P04805 | <a href="#">cysk_ecoli</a> | <a href="#">sye_ecoli</a>  | cysK | gtX  |

|        |                            |                            |      |      |
|--------|----------------------------|----------------------------|------|------|
| P00962 | <a href="#">cysk_ecoli</a> | <a href="#">syq_ecoli</a>  | cysK | glnS |
| P0A6Y8 | <a href="#">cysp_ecoli</a> | <a href="#">dnak_ecoli</a> | cysP | dnaK |
| P18843 | <a href="#">dapa_ecoli</a> | <a href="#">nade_ecoli</a> | dapA | nadE |
| P22525 | <a href="#">dapa_ecoli</a> | <a href="#">ycbb_ecoli</a> | dapA | ycbB |
| P60651 | <a href="#">dapd_ecoli</a> | <a href="#">speb_ecoli</a> | dapD | speB |
| P0A6F5 | <a href="#">dape_ecoli</a> | <a href="#">ch60_ecoli</a> | dapE | groL |
| P07363 | <a href="#">dbha_ecoli</a> | <a href="#">chea_ecoli</a> | hupA | cheA |
| P0ACF4 | <a href="#">dbha_ecoli</a> | <a href="#">dbhb_ecoli</a> | hupA | hupB |
| P0A6Y8 | <a href="#">dbha_ecoli</a> | <a href="#">dnak_ecoli</a> | hupA | dnaK |
| P0A6Y8 | <a href="#">dbha_ecoli</a> | <a href="#">dnak_ecoli</a> | hupA | dnaK |
| P15977 | <a href="#">dbha_ecoli</a> | <a href="#">malq_ecoli</a> | hupA | malQ |
| P0A772 | <a href="#">dbha_ecoli</a> | <a href="#">nrDI_ecoli</a> | hupA | nrDI |
| P76773 | <a href="#">dbha_ecoli</a> | <a href="#">ompl_ecoli</a> | hupA | ompl |
| P16690 | <a href="#">dbha_ecoli</a> | <a href="#">phnN_ecoli</a> | hupA | phnN |
| P00490 | <a href="#">dbha_ecoli</a> | <a href="#">phsm_ecoli</a> | hupA | malP |
| P02413 | <a href="#">dbha_ecoli</a> | <a href="#">rl15_ecoli</a> | hupA | rplO |
| P60422 | <a href="#">dbha_ecoli</a> | <a href="#">rl2_ecoli</a>  | hupA | rplB |
| P60723 | <a href="#">dbha_ecoli</a> | <a href="#">rl4_ecoli</a>  | hupA | rplD |
| P37765 | <a href="#">dbha_ecoli</a> | <a href="#">rlub_ecoli</a> | hupA | rluB |
| P0A7Z4 | <a href="#">dbha_ecoli</a> | <a href="#">rpoA_ecoli</a> | hupA | rpoA |
| P0A7V8 | <a href="#">dbha_ecoli</a> | <a href="#">rs4_ecoli</a>  | hupA | rpsD |
| P75989 | <a href="#">dbha_ecoli</a> | <a href="#">ycgE_ecoli</a> | hupA | ycgE |
| P08245 | <a href="#">dbha_ecoli</a> | <a href="#">yciH_ecoli</a> | hupA | yciH |
| P0ACF0 | <a href="#">dbhb_ecoli</a> | <a href="#">dbha_ecoli</a> | hupB | hupA |
| P0AC41 | <a href="#">dbhb_ecoli</a> | <a href="#">dhsA_ecoli</a> | hupB | sdhA |
| P0A6Y8 | <a href="#">dbhb_ecoli</a> | <a href="#">dnak_ecoli</a> | hupB | dnaK |
| P00582 | <a href="#">dbhb_ecoli</a> | <a href="#">dpo1_ecoli</a> | hupB | polA |



|        |            |             |      |      |
|--------|------------|-------------|------|------|
| P00582 | dbhb_ecoli | dpo1_ecoli  | hupB | polA |
| P10443 | dbhb_ecoli | dpo3a_ecoli | hupB | dnaE |
| P0A6R3 | dbhb_ecoli | fis_ecoli   | hupB | fis  |
| P0A6W5 | dbhb_ecoli | grea_ecoli  | hupB | greA |
| P0ACF8 | dbhb_ecoli | hns_ecoli   | hupB | hns  |
| P0A6Z3 | dbhb_ecoli | htpg_ecoli  | hupB | htpG |
| P0A6X7 | dbhb_ecoli | ihfa_ecoli  | hupB | ihfA |
| P0A6Y1 | dbhb_ecoli | ihfb_ecoli  | hupB | ihfB |
| P15977 | dbhb_ecoli | malq_ecoli  | hupB | malQ |
| P15977 | dbhb_ecoli | malq_ecoli  | hupB | malQ |
| P18843 | dbhb_ecoli | nade_ecoli  | hupB | nadE |
| P38489 | dbhb_ecoli | nfnb_ecoli  | hupB | nfnB |
| P0AFD1 | dbhb_ecoli | nuoe_ecoli  | hupB | nuoE |
| P15288 | dbhb_ecoli | pepd_ecoli  | hupB | pepD |
| P00490 | dbhb_ecoli | phsm_ecoli  | hupB | malP |
| P00490 | dbhb_ecoli | phsm_ecoli  | hupB | malP |
| P36767 | dbhb_ecoli | rdgc_ecoli  | hupB | rdgC |
| P25888 | dbhb_ecoli | rhle_ecoli  | hupB | rhIE |
| P0A7L0 | dbhb_ecoli | rl1_ecoli   | hupB | rplA |
| P0AG44 | dbhb_ecoli | rl17_ecoli  | hupB | rplQ |
| P0A7K6 | dbhb_ecoli | rl19_ecoli  | hupB | rplS |
| P60422 | dbhb_ecoli | rl2_ecoli   | hupB | rplB |
| P0AG48 | dbhb_ecoli | rl21_ecoli  | hupB | rplU |
| P60438 | dbhb_ecoli | rl3_ecoli   | hupB | rplC |
| P60438 | dbhb_ecoli | rl3_ecoli   | hupB | rplC |
| P0A7R1 | dbhb_ecoli | rl9_ecoli   | hupB | rplI |
| P0A7Z4 | dbhb_ecoli | rpoa_ecoli  | hupB | rpoA |
| P0A7S9 | dbhb_ecoli | rs13_ecoli  | hupB | rpsM |
| P0A7V8 | dbhb_ecoli | rs4_ecoli   | hupB | rpsD |
| P02359 | dbhb_ecoli | rs7_ecoli   | hupB | rpsG |
| P02359 | dbhb_ecoli | rs7_ecoli   | hupB | rpsG |
| P0A7X3 | dbhb_ecoli | rs9_ecoli   | hupB | rpsI |
| P0AFY8 | dbhb_ecoli | seqa_ecoli  | hupB | seqA |
| P0AEU7 | dbhb_ecoli | skp_ecoli   | hupB | skp  |
| P0A9K9 | dbhb_ecoli | slyd_ecoli  | hupB | slyD |
| P08957 | dbhb_ecoli | t1mk_ecoli  | hupB | hsdM |
| P39177 | dbhb_ecoli | uspg_ecoli  | hupB | uspG |
| P09184 | dbhb_ecoli | vsr_ecoli   | hupB | vsr  |
| P76104 | dbhb_ecoli | ydcP_ecoli  | hupB | ydcP |
| P0ACY9 | dbhb_ecoli | yebg_ecoli  | hupB | yebG |
| P64574 | dbhb_ecoli | yghw_ecoli  | hupB | yghW |
| P0A6F5 | dcea_ecoli | ch60_ecoli  | gadA | groL |
| P69910 | dcea_ecoli | dceb_ecoli  | gadA | gadB |
| P69910 | dcea_ecoli | dceb_ecoli  | gadA | gadB |

|        |            |            |      |      |
|--------|------------|------------|------|------|
| P69910 | dcea_ecoli | dceb_ecoli | gadA | gadB |
| P0A6Y8 | dcea_ecoli | dnak_ecoli | gadA | dnaK |
| P0A6Y8 | dcea_ecoli | dnak_ecoli | gadA | dnaK |
| P0A6Y8 | dcea_ecoli | dnak_ecoli | gadA | dnaK |
| P13035 | dcea_ecoli | glpd_ecoli | gadA | glpD |
| P13035 | dcea_ecoli | glpd_ecoli | gadA | glpD |
| P28635 | dcea_ecoli | metq_ecoli | gadA | metQ |
| P28635 | dcea_ecoli | metq_ecoli | gadA | metQ |
| P37194 | dcea_ecoli | slp_ecoli  | gadA | slp  |
| P28043 | dcea_ecoli | ssb2_ecolx | gadA | ssb  |
| P33225 | dcea_ecoli | tora_ecoli | gadA | torA |
| P75818 | dcea_ecoli | ybjp_ecoli | gadA | ybjP |
|        |            |            |      |      |
| P0A6F5 | dceb_ecoli | ch60_ecoli | gadB | groL |
| P69908 | dceb_ecoli | dcea_ecoli | gadB | gadA |
| P69908 | dceb_ecoli | dcea_ecoli | gadB | gadA |
| P0A6Y8 | dceb_ecoli | dnak_ecoli | gadB | dnaK |
| P36879 | dceb_ecoli | yadg_ecoli | gadB | yadG |
|        |            |            |      |      |
| P0AE12 | dcm_ecoli  | amn_ecoli  | dcm  | amn  |
| P0A6F5 | dcm_ecoli  | ch60_ecoli | dcm  | groL |
| P22523 | dcm_ecoli  | mukb_ecoli | dcm  | mukB |
| P06959 | dcm_ecoli  | odp2_ecoli | dcm  | aceF |
| P0ACP7 | dcm_ecoli  | purr_ecoli | dcm  | purR |
| P0C0U4 | dcm_ecoli  | rimk_ecoli | dcm  | rimK |
| P0A7L0 | dcm_ecoli  | rl1_ecoli  | dcm  | rplA |
| P0AA10 | dcm_ecoli  | rl13_ecoli | dcm  | rplM |
| P60422 | dcm_ecoli  | rl2_ecoli  | dcm  | rplB |
| P0AG48 | dcm_ecoli  | rl21_ecoli | dcm  | rplU |
| P61175 | dcm_ecoli  | rl22_ecoli | dcm  | rplV |
| P60438 | dcm_ecoli  | rl3_ecoli  | dcm  | rplC |
| P0AG59 | dcm_ecoli  | rs14_ecoli | dcm  | rpsN |
| P0A7U7 | dcm_ecoli  | rs20_ecoli | dcm  | rpsT |
| P0A7V3 | dcm_ecoli  | rs3_ecoli  | dcm  | rpsC |
| P0A7W1 | dcm_ecoli  | rs5_ecoli  | dcm  | rpsE |
| P02359 | dcm_ecoli  | rs7_ecoli  | dcm  | rpsG |
| P76339 | dcm_ecoli  | yedv_ecoli | dcm  | yedV |
|        |            |            |      |      |
| P0ABA6 | dcp_ecoli  | atpg_ecoli | dcp  | atpG |
| P36938 | dcp_ecoli  | pgm_ecoli  | dcp  | pgm  |
| P60422 | dcp_ecoli  | rl2_ecoli  | dcp  | rplB |
|        |            |            |      |      |
| P0AC41 | dcus_ecoli | dhsa_ecoli | dcuS | sdhA |

|        |            |            |      |      |
|--------|------------|------------|------|------|
| P32718 | ddla_ecoli | alsk_ecoli | ddIA | alsK |
| P69503 | ddla_ecoli | apt_ecoli  | ddIA | apt  |
| P33363 | ddla_ecoli | bgix_ecoli | ddIA | bgIX |
| P24169 | ddla_ecoli | dcos_ecoli | ddIA | speF |
| P76128 | ddla_ecoli | ddpa_ecoli | ddIA | ddpA |
| P0A6Y8 | ddla_ecoli | dnak_ecoli | ddIA | dnaK |
| P0AD68 | ddla_ecoli | ftsi_ecoli | ddIA | ftsi |
| P15038 | ddla_ecoli | held_ecoli | ddIA | helD |
| P18843 | ddla_ecoli | nade_ecoli | ddIA | nadE |
| P07004 | ddla_ecoli | proa_ecoli | ddIA | proA |
| P0ADN0 | ddla_ecoli | viaa_ecoli | ddIA | viaA |
| P30864 | ddla_ecoli | yafc_ecoli | ddIA | yafC |

|        |            |            |      |      |
|--------|------------|------------|------|------|
| P0ABD5 | dead_ecoli | acca_ecoli | deaD | accA |
| P0A6A8 | dead_ecoli | acp_ecoli  | deaD | acpP |
| Q46829 | dead_ecoli | bgla_ecoli | deaD | bgIA |
| P0A9Y6 | dead_ecoli | cspc_ecoli | deaD | cspC |
| P0AEB2 | dead_ecoli | daca_ecoli | deaD | dacA |
| P0ACF0 | dead_ecoli | dbha_ecoli | deaD | hupA |
| P0ACF4 | dead_ecoli | dbhb_ecoli | deaD | hupB |
| P08622 | dead_ecoli | dnaj_ecoli | deaD | dnaJ |
| P0AEG1 | dead_ecoli | dppc_ecoli | deaD | dppC |
| P0ACZ4 | dead_ecoli | evga_ecoli | deaD | evgA |
| P75825 | dead_ecoli | hcp_ecoli  | deaD | hcp  |
| P43329 | dead_ecoli | hrpa_ecoli | deaD | hrpA |
| P0AEW6 | dead_ecoli | ingk_ecoli | deaD | gsk  |
| P0AFG8 | dead_ecoli | odp1_ecoli | deaD | aceE |
| P0AFG8 | dead_ecoli | odp1_ecoli | deaD | aceE |
| P0A7L0 | dead_ecoli | rl1_ecoli  | deaD | rplA |
| P0A7L0 | dead_ecoli | rl1_ecoli  | deaD | rplA |
| P0A7J7 | dead_ecoli | rl11_ecoli | deaD | rplK |
| P0AA10 | dead_ecoli | rl13_ecoli | deaD | rplM |
| P0AA10 | dead_ecoli | rl13_ecoli | deaD | rplM |
| P0ADY7 | dead_ecoli | rl16_ecoli | deaD | rplP |
| P0AG44 | dead_ecoli | rl17_ecoli | deaD | rplQ |
| P0C018 | dead_ecoli | rl18_ecoli | deaD | rplR |
| P0A7K6 | dead_ecoli | rl19_ecoli | deaD | rplS |
| P60422 | dead_ecoli | rl2_ecoli  | deaD | rplB |
| P60422 | dead_ecoli | rl2_ecoli  | deaD | rplB |
| P0AG48 | dead_ecoli | rl21_ecoli | deaD | rplU |
| P61175 | dead_ecoli | rl22_ecoli | deaD | rplV |
| P61175 | dead_ecoli | rl22_ecoli | deaD | rplV |
| P0ADZ0 | dead_ecoli | rl23_ecoli | deaD | rplW |
| P60624 | dead_ecoli | rl24_ecoli | deaD | rplX |

|        |            |            |      |      |
|--------|------------|------------|------|------|
| P0A7L8 | dead_ecoli | rl27_ecoli | deaD | rpmA |
| P0A7M2 | dead_ecoli | rl28_ecoli | deaD | rpmB |
| P60438 | dead_ecoli | rl3_ecoli  | deaD | rplC |
| P60723 | dead_ecoli | rl4_ecoli  | deaD | rplD |
| P0AG55 | dead_ecoli | rl6_ecoli  | deaD | rplF |
| P0A7R1 | dead_ecoli | rl9_ecoli  | deaD | rplI |
| P0A7R1 | dead_ecoli | rl9_ecoli  | deaD | rplI |
| P75864 | dead_ecoli | rlml_ecoli | deaD | rlmL |
| P37765 | dead_ecoli | rlub_ecoli | deaD | rluB |
| P37765 | dead_ecoli | rlub_ecoli | deaD | rluB |
| P21499 | dead_ecoli | rnrc_ecoli | deaD | rnrc |
| P21499 | dead_ecoli | rnrc_ecoli | deaD | rnrc |
| P0AG67 | dead_ecoli | rs1_ecoli  | deaD | rpsA |
| P0AG67 | dead_ecoli | rs1_ecoli  | deaD | rpsA |
| P0A7R5 | dead_ecoli | rs10_ecoli | deaD | rpsJ |
| P0A7R9 | dead_ecoli | rs11_ecoli | deaD | rpsK |
| P0A7S9 | dead_ecoli | rs13_ecoli | deaD | rpsM |
| P0A7S9 | dead_ecoli | rs13_ecoli | deaD | rpsM |
| P0AG59 | dead_ecoli | rs14_ecoli | deaD | rpsN |
| P0ADZ4 | dead_ecoli | rs15_ecoli | deaD | rpsO |
| P0A7T3 | dead_ecoli | rs16_ecoli | deaD | rpsP |
| P0A7T7 | dead_ecoli | rs18_ecoli | deaD | rpsR |
| P0A7U3 | dead_ecoli | rs19_ecoli | deaD | rpsS |
| P0A7V0 | dead_ecoli | rs2_ecoli  | deaD | rpsB |
| P0A7V0 | dead_ecoli | rs2_ecoli  | deaD | rpsB |
| P0A7U7 | dead_ecoli | rs20_ecoli | deaD | rpsT |
| P68679 | dead_ecoli | rs21_ecoli | deaD | rpsU |
| P68679 | dead_ecoli | rs21_ecoli | deaD | rpsU |
| P0A7V3 | dead_ecoli | rs3_ecoli  | deaD | rpsC |
| P0A7V3 | dead_ecoli | rs3_ecoli  | deaD | rpsC |
| P0A7V8 | dead_ecoli | rs4_ecoli  | deaD | rpsD |
| P0A7V8 | dead_ecoli | rs4_ecoli  | deaD | rpsD |
| P0A7W1 | dead_ecoli | rs5_ecoli  | deaD | rpsE |
| P0A7W1 | dead_ecoli | rs5_ecoli  | deaD | rpsE |
| P02358 | dead_ecoli | rs6_ecoli  | deaD | rpsF |
| P02359 | dead_ecoli | rs7_ecoli  | deaD | rpsG |
| P02359 | dead_ecoli | rs7_ecoli  | deaD | rpsG |
| P0A7W7 | dead_ecoli | rs8_ecoli  | deaD | rpsH |
| P0A7X3 | dead_ecoli | rs9_ecoli  | deaD | rpsI |
| P76502 | dead_ecoli | sixa_ecoli | deaD | sixA |
| P21507 | dead_ecoli | srmB_ecoli | deaD | srmB |
| P0AGE9 | dead_ecoli | sucD_ecoli | deaD | sucD |
| P77499 | dead_ecoli | sufC_ecoli | deaD | sufC |
| P0AGM7 | dead_ecoli | uraA_ecoli | deaD | uraA |
| P0AGJ5 | dead_ecoli | yfiF_ecoli | deaD | yfiF |

|        |                            |                            |      |      |
|--------|----------------------------|----------------------------|------|------|
| P0AGJ5 | <a href="#">dead_ecoli</a> | <a href="#">yfif_ecoli</a> | deaD | yfiF |
| P30871 | dead_ecoli                 | <a href="#">ygif_ecoli</a> | deaD | ygiF |
| P37634 | dead_ecoli                 | <a href="#">yhir_ecoli</a> | deaD | yhiR |
| P32138 | dead_ecoli                 | <a href="#">yihq_ecoli</a> | deaD | yihQ |
| P60723 | <a href="#">def_ecoli</a>  | <a href="#">rl4_ecoli</a>  | def  | rplD |
| P08390 | <a href="#">def_ecoli</a>  | <a href="#">usg_ecoli</a>  | def  | usg  |
| P28634 | def_ecoli                  | <a href="#">yaeb_ecoli</a> | def  | yaeB |
| P0A6Y8 | <a href="#">degp_ecoli</a> | <a href="#">dnak_ecoli</a> | degP | dnaK |
| P75969 | deob_ecoli                 | <a href="#">inte_ecoli</a> | deoB | intE |
| P0A7K6 | <a href="#">deob_ecoli</a> | <a href="#">rl19_ecoli</a> | deoB | rplS |
| P0AFX9 | deob_ecoli                 | <a href="#">rseb_ecoli</a> | deoB | rseB |
| P75804 | deob_ecoli                 | <a href="#">ylii_ecoli</a> | deoB | ylil |
| P18843 | <a href="#">deoc_ecoli</a> | <a href="#">nade_ecoli</a> | deoC | nadE |
| P15288 | <a href="#">deoc_ecoli</a> | <a href="#">pepd_ecoli</a> | deoC | pepD |
| P04805 | <a href="#">deoc_ecoli</a> | <a href="#">syecoli</a>    | deoC | gltX |
| P0A7E9 | deod_ecoli                 | <a href="#">pyrh_ecoli</a> | deoD | pyrH |
| P60560 | dhak_ecoli                 | <a href="#">guac_ecoli</a> | dhaK | guaC |
| P37624 | dhak_ecoli                 | <a href="#">yhii_ecoli</a> | dhaK | yhiH |
| P0A6Y8 | <a href="#">dhas_ecoli</a> | <a href="#">dnak_ecoli</a> | asd  | dnaK |
| P0A6B4 | dhna_ecoli                 | <a href="#">alr1_ecoli</a> | ndh  | alr  |
| P67910 | <a href="#">dhna_ecoli</a> | <a href="#">hlDD_ecoli</a> | ndh  | hldD |
| P76773 | dhna_ecoli                 | <a href="#">ompl_ecoli</a> | ndh  | ompl |
| P60422 | <a href="#">dhna_ecoli</a> | <a href="#">rl2_ecoli</a>  | ndh  | rplB |
| P0A7V3 | <a href="#">dhna_ecoli</a> | <a href="#">rs3_ecoli</a>  | ndh  | rpsC |
| P0A7X3 | <a href="#">dhna_ecoli</a> | <a href="#">rs9_ecoli</a>  | ndh  | rpsI |
| P07014 | dhSA_ecoli                 | <a href="#">dhSB_ecoli</a> | sdhA | sdhB |
| P07014 | dhSA_ecoli                 | <a href="#">dhSB_ecoli</a> | sdhA | sdhB |
| P07014 | dhSA_ecoli                 | <a href="#">dhSB_ecoli</a> | sdhA | sdhB |
| P69054 | dhSA_ecoli                 | <a href="#">dhSC_ecoli</a> | sdhA | sdhC |
| P69054 | dhSA_ecoli                 | <a href="#">dhSC_ecoli</a> | sdhA | sdhC |

|        |            |            |      |      |
|--------|------------|------------|------|------|
| P0AC44 | dhsa_ecoli | dhsd_ecoli | sdhA | sdhD |
| P0AC44 | dhsa_ecoli | dhsd_ecoli | sdhA | sdhD |
| P18843 | dhsa_ecoli | nade_ecoli | sdhA | nadE |
| P0A6Y8 | dica_ecoli | dnak_ecoli | dicA | dnaK |
| P0C077 | dica_ecoli | rele_ecoli | dicA | reIE |
| P0A7U7 | dica_ecoli | rs20_ecoli | dicA | rpsT |
| P0A7V8 | dica_ecoli | rs4_ecoli  | dicA | rpsD |
| P68206 | dica_ecoli | ybjj_ecoli | dicA | ybjJ |
| P0A6F3 | dksa_ecoli | glpk_ecoli | dksA | glpK |
| P0A6W5 | dksa_ecoli | grea_ecoli | dksA | greA |
| P37651 | dksa_ecoli | gun_ecoli  | dksA | bcsZ |
| P15288 | dksa_ecoli | pepd_ecoli | dksA | pepD |
| P39177 | dksa_ecoli | uspg_ecoli | dksA | uspG |
| P31063 | dksa_ecoli | yedd_ecoli | dksA | yedD |
| P77536 | dksa_ecoli | ykgf_ecoli | dksA | ykgF |
| P76148 | dksa_ecoli | yneg_ecoli | dksA | yneG |
| P0A6B7 | dldh_ecoli | iscs_ecoli | lpdA | iscS |
| P0AFG8 | dldh_ecoli | odp1_ecoli | lpdA | aceE |
| P06959 | dldh_ecoli | odp2_ecoli | lpdA | aceF |
| P0A7J0 | dldh_ecoli | ribb_ecoli | lpdA | ribB |
| P0A6F5 | dma_ecoli  | ch60_ecoli | dam  | groL |
| P0A9P0 | dma_ecoli  | dldh_ecoli | dam  | lpdA |
| P0A9P0 | dma_ecoli  | dldh_ecoli | dam  | lpdA |
| P10805 | dma_ecoli  | envy_ecoli | dam  | envY |
| P13035 | dma_ecoli  | glpd_ecoli | dam  | glpD |
| P0A6Z3 | dma_ecoli  | htpg_ecoli | dam  | htpG |
| P19319 | dma_ecoli  | narz_ecoli | dam  | narZ |
| P0AFG8 | dma_ecoli  | odp1_ecoli | dam  | aceE |
| P0A7L0 | dma_ecoli  | rl1_ecoli  | dam  | rplA |
| P0AG44 | dma_ecoli  | rl17_ecoli | dam  | rplQ |
| P0A7K6 | dma_ecoli  | rl19_ecoli | dam  | rplS |
| P61175 | dma_ecoli  | rl22_ecoli | dam  | rplV |
| P60723 | dma_ecoli  | rl4_ecoli  | dam  | rplD |
| P0A8V2 | dma_ecoli  | rpob_ecoli | dam  | rpoB |
| P0A8T7 | dma_ecoli  | rpoc_ecoli | dam  | rpoC |
| P0A7S9 | dma_ecoli  | rs13_ecoli | dam  | rpsM |
| P0A7V3 | dma_ecoli  | rs3_ecoli  | dam  | rpsC |
| P0A7V8 | dma_ecoli  | rs4_ecoli  | dam  | rpsD |
| P02359 | dma_ecoli  | rs7_ecoli  | dam  | rpsG |

|        |                           |                            |     |      |
|--------|---------------------------|----------------------------|-----|------|
| POA8L1 | <a href="#">dma_ecoli</a> | <a href="#">sys_ecoli</a>  | dam | serS |
| P39306 | <a href="#">dma_ecoli</a> | <a href="#">ulaf_ecoli</a> | dam | ulaF |
| POA8B5 | <a href="#">dma_ecoli</a> | <a href="#">ybab_ecoli</a> | dam | ybaB |
| P32685 | <a href="#">dma_ecoli</a> | <a href="#">yjbd_ecoli</a> | dam | yjbD |
| P37342 | <a href="#">dma_ecoli</a> | <a href="#">yjji_ecoli</a> | dam | yjji |

|        |                            |                             |      |      |
|--------|----------------------------|-----------------------------|------|------|
| P22333 | <a href="#">dnaj_ecoli</a> | <a href="#">add_ecoli</a>   | dnaj | add  |
| POABB4 | <a href="#">dnaj_ecoli</a> | <a href="#">atpb_ecoli</a>  | dnaj | atpD |
| POABH9 | <a href="#">dnaj_ecoli</a> | <a href="#">clpa_ecoli</a>  | dnaj | clpA |
| POA9P6 | <a href="#">dnaj_ecoli</a> | <a href="#">dead_ecoli</a>  | dnaj | deaD |
| POA6Y8 | <a href="#">dnaj_ecoli</a> | <a href="#">dnak_ecoli</a>  | dnaj | dnaK |
| POA6Y8 | <a href="#">dnaj_ecoli</a> | <a href="#">dnak_ecoli</a>  | dnaj | dnaK |
| POA6Y8 | <a href="#">dnaj_ecoli</a> | <a href="#">dnak_ecoli</a>  | dnaj | dnaK |
| POA6Y8 | <a href="#">dnaj_ecoli</a> | <a href="#">dnak_ecoli</a>  | dnaj | dnaK |
| POA6Y8 | <a href="#">dnaj_ecoli</a> | <a href="#">dnak_ecoli</a>  | dnaj | dnaK |
| POCE47 | <a href="#">dnaj_ecoli</a> | <a href="#">eftu1_ecoli</a> | dnaj | tufA |
| POC8J6 | <a href="#">dnaj_ecoli</a> | <a href="#">gaty_ecoli</a>  | dnaj | gatY |
| POA705 | <a href="#">dnaj_ecoli</a> | <a href="#">if2_ecoli</a>   | dnaj | infB |
| P31554 | <a href="#">dnaj_ecoli</a> | <a href="#">lptd_ecoli</a>  | dnaj | lptD |
| POAEX9 | <a href="#">dnaj_ecoli</a> | <a href="#">male_ecoli</a>  | dnaj | malE |
| PO6993 | <a href="#">dnaj_ecoli</a> | <a href="#">malt_ecoli</a>  | dnaj | malT |
| POA817 | <a href="#">dnaj_ecoli</a> | <a href="#">metk_ecoli</a>  | dnaj | metK |
| POA6U3 | <a href="#">dnaj_ecoli</a> | <a href="#">mnmg_ecoli</a>  | dnaj | mnmG |
| POA9X4 | <a href="#">dnaj_ecoli</a> | <a href="#">mreb_ecoli</a>  | dnaj | mreB |
| P22523 | <a href="#">dnaj_ecoli</a> | <a href="#">mukb_ecoli</a>  | dnaj | mukB |
| P09152 | <a href="#">dnaj_ecoli</a> | <a href="#">narg_ecoli</a>  | dnaj | narG |
| POAFG6 | <a href="#">dnaj_ecoli</a> | <a href="#">odo2_ecoli</a>  | dnaj | sucB |
| POAFG8 | <a href="#">dnaj_ecoli</a> | <a href="#">odp1_ecoli</a>  | dnaj | aceE |
| P05459 | <a href="#">dnaj_ecoli</a> | <a href="#">pdxb_ecoli</a>  | dnaj | pdxB |
| POAAH0 | <a href="#">dnaj_ecoli</a> | <a href="#">pstb_ecoli</a>  | dnaj | pstB |
| POA7G6 | <a href="#">dnaj_ecoli</a> | <a href="#">reca_ecoli</a>  | dnaj | recA |
| POC077 | <a href="#">dnaj_ecoli</a> | <a href="#">rele_ecoli</a>  | dnaj | relE |
| POAG30 | <a href="#">dnaj_ecoli</a> | <a href="#">rho_ecoli</a>   | dnaj | rho  |
| POA7L0 | <a href="#">dnaj_ecoli</a> | <a href="#">rl1_ecoli</a>   | dnaj | rplA |
| POA7J3 | <a href="#">dnaj_ecoli</a> | <a href="#">rl10_ecoli</a>  | dnaj | rplJ |
| POA7K6 | <a href="#">dnaj_ecoli</a> | <a href="#">rl19_ecoli</a>  | dnaj | rplS |
| P61175 | <a href="#">dnaj_ecoli</a> | <a href="#">rl22_ecoli</a>  | dnaj | rplV |
| POADZ0 | <a href="#">dnaj_ecoli</a> | <a href="#">rl23_ecoli</a>  | dnaj | rplW |
| P60624 | <a href="#">dnaj_ecoli</a> | <a href="#">rl24_ecoli</a>  | dnaj | rplX |
| POA8T7 | <a href="#">dnaj_ecoli</a> | <a href="#">rpoc_ecoli</a>  | dnaj | rpoC |
| POA7R5 | <a href="#">dnaj_ecoli</a> | <a href="#">rs10_ecoli</a>  | dnaj | rpsJ |
| POA7R5 | <a href="#">dnaj_ecoli</a> | <a href="#">rs10_ecoli</a>  | dnaj | rpsJ |
| POA7S9 | <a href="#">dnaj_ecoli</a> | <a href="#">rs13_ecoli</a>  | dnaj | rpsM |

|        |            |             |      |      |
|--------|------------|-------------|------|------|
| P0AG59 | dnaj_ecoli | rs14_ecoli  | dnaJ | rpsN |
| P0A7V0 | dnaj_ecoli | rs2_ecoli   | dnaJ | rpsB |
| P0A7W1 | dnaj_ecoli | rs5_ecoli   | dnaJ | rpsE |
| P02358 | dnaj_ecoli | rs6_ecoli   | dnaJ | rpsF |
| P21507 | dnaj_ecoli | srmB_ecoli  | dnaJ | srmB |
| P0AGG4 | dnaj_ecoli | thio2_ecoli | dnaJ | trxC |
| P68206 | dnaj_ecoli | yjbj_ecoli  | dnaJ | yjbj |
|        |            |             |      |      |
| P69908 | dnak_ecoli | dcea_ecoli  | dnaK | gadA |
| P69910 | dnak_ecoli | dceb_ecoli  | dnaK | gadB |
| P45428 | dnak_ecoli | dcud_ecoli  | dnaK | dcuD |
| P0CE47 | dnak_ecoli | eftu1_ecoli | dnaK | tufA |
| P0CE47 | dnak_ecoli | eftu1_ecoli | dnaK | tufA |
| P0ADI4 | dnak_ecoli | entb_ecoli  | dnaK | entB |
| P0A953 | dnak_ecoli | fabb_ecoli  | dnaK | fabB |
| P09372 | dnak_ecoli | grpe_ecoli  | dnaK | grpE |
| P09372 | dnak_ecoli | grpe_ecoli  | dnaK | grpE |
| P09372 | dnak_ecoli | grpe_ecoli  | dnaK | grpE |
| P0AES4 | dnak_ecoli | gyra_ecoli  | dnaK | gyrA |
| P06986 | dnak_ecoli | his8_ecoli  | dnaK | hisC |
| P0A6Z1 | dnak_ecoli | hsca_ecoli  | dnaK | hscA |
| P0A6Z3 | dnak_ecoli | htpg_ecoli  | dnaK | htpG |
| P14509 | dnak_ecoli | kka8_ecolx  | dnaK | aphA |
| P0A9M0 | dnak_ecoli | lon_ecoli   | dnaK | lon  |
| P27896 | dnak_ecoli | narq_ecoli  | dnaK | narQ |
| P37095 | dnak_ecoli | pepb_ecoli  | dnaK | pepB |
| P0A7J3 | dnak_ecoli | rl10_ecoli  | dnaK | rplJ |
| P0A7K6 | dnak_ecoli | rl19_ecoli  | dnaK | rplS |
| P0A7N9 | dnak_ecoli | rl33_ecoli  | dnaK | rpmG |
| P60723 | dnak_ecoli | rl4_ecoli   | dnaK | rplD |
| P0AG55 | dnak_ecoli | rl6_ecoli   | dnaK | rplF |
| P0A7R1 | dnak_ecoli | rl9_ecoli   | dnaK | rplI |
| P21513 | dnak_ecoli | rne_ecoli   | dnaK | rne  |
| P0AG67 | dnak_ecoli | rs1_ecoli   | dnaK | rpsA |
| P0A7V0 | dnak_ecoli | rs2_ecoli   | dnaK | rpsB |
| P0A7V0 | dnak_ecoli | rs2_ecoli   | dnaK | rpsB |
| Q47622 | dnak_ecoli | sapa_ecoli  | dnaK | sapA |
| P00957 | dnak_ecoli | sya_ecoli   | dnaK | alaS |
| P21889 | dnak_ecoli | syd_ecoli   | dnaK | aspS |
| P16659 | dnak_ecoli | syp_ecoli   | dnaK | proS |
| P42630 | dnak_ecoli | tdcg_ecoli  | dnaK | tdcG |
| P77730 | dnak_ecoli | ydcR_ecoli  | dnaK | ydcR |
| P77228 | dnak_ecoli | ydfj_ecoli  | dnaK | ydfJ |
| P0ADK6 | dnak_ecoli | yiba_ecoli  | dnaK | yibA |
| P32134 | dnak_ecoli | yihm_ecoli  | dnaK | yihM |



|        |             |             |      |      |
|--------|-------------|-------------|------|------|
| P45395 | dosp_ecoli  | kdsd_ecoli  | dosP | kdsD |
| P0A867 | dosp_ecoli  | tala_ecoli  | dosP | tala |
| P28630 | dpo3b_ecoli | hola_ecoli  | dnaN | holA |
| P28630 | dpo3b_ecoli | hola_ecoli  | dnaN | holA |
| P0A9P6 | dps_ecoli   | dead_ecoli  | dps  | deaD |
| P0A6X3 | dps_ecoli   | hfq_ecoli   | dps  | hfq  |
| P67910 | dps_ecoli   | hldd_ecoli  | dps  | hldD |
| P67910 | dps_ecoli   | hldd_ecoli  | dps  | hldD |
| P43329 | dps_ecoli   | hrpa_ecoli  | dps  | hrpA |
| P0A9M0 | dps_ecoli   | lon_ecoli   | dps  | lon  |
| P76045 | dps_ecoli   | ompg_ecoli  | dps  | ompG |
| P0ADZ0 | dps_ecoli   | rl23_ecoli  | dps  | rplW |
| P60624 | dps_ecoli   | rl24_ecoli  | dps  | rplX |
| P0A7R5 | dps_ecoli   | rs10_ecoli  | dps  | rpsJ |
| P0A7W1 | dps_ecoli   | rs5_ecoli   | dps  | rpsE |
| P02358 | dps_ecoli   | rs6_ecoli   | dps  | rpsF |
| P0A7W7 | dps_ecoli   | rs8_ecoli   | dps  | rpsH |
| P0AEU7 | dps_ecoli   | skp_ecoli   | dps  | skp  |
| P0A9K9 | dps_ecoli   | slyd_ecoli  | dps  | slyD |
| P0A862 | dps_ecoli   | tpx_ecoli   | dps  | tpx  |
| P0ADK8 | dps_ecoli   | yibl_ecoli  | dps  | yibL |
| P0A9Q7 | dxs_ecoli   | adhe_ecoli  | dxs  | adhE |
| P05052 | dxs_ecoli   | appy_ecoli  | dxs  | appY |
| P00722 | dxs_ecoli   | bgal_ecoli  | dxs  | lacZ |
| P0ABH9 | dxs_ecoli   | clpa_ecoli  | dxs  | clpA |
| P0A9X9 | dxs_ecoli   | cspa_ecoli  | dxs  | cspA |
| P0CE47 | dxs_ecoli   | eftu1_ecoli | dxs  | tufA |
| P24183 | dxs_ecoli   | fdng_ecoli  | dxs  | fdnG |
| P09831 | dxs_ecoli   | gltb_ecoli  | dxs  | glbB |
| P0A9M0 | dxs_ecoli   | lon_ecoli   | dxs  | lon  |
| P0A9X4 | dxs_ecoli   | mreb_ecoli  | dxs  | mreB |
| P0AFG8 | dxs_ecoli   | odp1_ecoli  | dxs  | aceE |
| P0AAH0 | dxs_ecoli   | pstb_ecoli  | dxs  | pstB |
| P0A7G6 | dxs_ecoli   | reca_ecoli  | dxs  | recA |
| P0AG30 | dxs_ecoli   | rho_ecoli   | dxs  | rho  |
| P0A843 | dxs_ecoli   | tate_ecoli  | dxs  | tatE |
| P39336 | dxs_ecoli   | yjgl_ecoli  | dxs  | yjgL |
| Q46942 | dxs_ecoli   | yqei_ecoli  | dxs  | yqeI |

|        |             |             |      |       |
|--------|-------------|-------------|------|-------|
| P23827 | ecot_ecoli  | ecot_ecoli  | eco  | eco   |
| P69503 | efg_ecoli   | apt_ecoli   | fusA | apt   |
| P07639 | efg_ecoli   | arob_ecoli  | fusA | aroB  |
| P0A9I1 | efg_ecoli   | cite_ecoli  | fusA | citE  |
| P0A6P1 | efg_ecoli   | efts_ecoli  | fusA | tsf   |
| P0A6P1 | efg_ecoli   | efts_ecoli  | fusA | tsf   |
| P0CE47 | efg_ecoli   | eftu1_ecoli | fusA | tufA  |
| P0CE47 | efg_ecoli   | eftu1_ecoli | fusA | tufA  |
| P0CE47 | efg_ecoli   | eftu1_ecoli | fusA | tufA  |
| P33129 | efg_ecoli   | htre_ecoli  | fusA | htrE  |
| P18843 | efg_ecoli   | nade_ecoli  | fusA | nadE  |
| P04983 | efg_ecoli   | rbsa_ecoli  | fusA | rbsA  |
| P16916 | efg_ecoli   | rhsa_ecoli  | fusA | rhsA  |
| P61887 | efg_ecoli   | rmla2_ecoli | fusA | rmlA2 |
| P75828 | efg_ecoli   | ybjd_ecoli  | fusA | ybjD  |
| P76204 | efg_ecoli   | ydiv_ecoli  | fusA | ydiV  |
| P0ACY3 | efg_ecoli   | yeag_ecoli  | fusA | yeaG  |
| P39263 | efg_ecoli   | yfcc_ecoli  | fusA | yfcC  |
| O32528 | efg_ecoli   | ypdi_ecoli  | fusA | ypdI  |
|        |             |             |      |       |
| P36560 | efts_ecoli  | asr_ecoli   | tsf  | asr   |
| P0AEF0 | efts_ecoli  | dnac_ecoli  | tsf  | dnaC  |
| P33128 | efts_ecoli  | ecpd_ecoli  | tsf  | ecpD  |
| P0CE47 | efts_ecoli  | eftu1_ecoli | tsf  | tufA  |
| P0CE47 | efts_ecoli  | eftu1_ecoli | tsf  | tufA  |
| P0CE47 | efts_ecoli  | eftu1_ecoli | tsf  | tufA  |
| P0CE47 | efts_ecoli  | eftu1_ecoli | tsf  | tufA  |
| P0A7W1 | efts_ecoli  | rs5_ecoli   | tsf  | rpsE  |
| P08957 | efts_ecoli  | t1mk_ecoli  | tsf  | hsdM  |
|        |             |             |      |       |
| P24181 | eftu1_ecoli | acrF_ecoli  | tufA | acrF  |
| P08622 | eftu1_ecoli | dnaj_ecoli  | tufA | dnaJ  |
| P0A6Y8 | eftu1_ecoli | dnak_ecoli  | tufA | dnaK  |
| P0A6P1 | eftu1_ecoli | efts_ecoli  | tufA | tsf   |
| P0A6P1 | eftu1_ecoli | efts_ecoli  | tufA | tsf   |
| P0A6P1 | eftu1_ecoli | efts_ecoli  | tufA | tsf   |
| P0A6P1 | eftu1_ecoli | efts_ecoli  | tufA | tsf   |
| P37009 | eftu1_ecoli | fbpc_ecoli  | tufA | fbpC  |

|        |                             |                            |      |      |
|--------|-----------------------------|----------------------------|------|------|
| P0A817 | <a href="#">eftu1_ecoli</a> | <a href="#">metk_ecoli</a> | tufA | metK |
| P0A9X4 | <a href="#">eftu1_ecoli</a> | <a href="#">mreb_ecoli</a> | tufA | mreB |
| P10408 | <a href="#">eftu1_ecoli</a> | <a href="#">seca_ecoli</a> | tufA | secA |
| P10408 | <a href="#">eftu1_ecoli</a> | <a href="#">seca_ecoli</a> | tufA | secA |
| P07118 | <a href="#">eftu1_ecoli</a> | <a href="#">syv_ecoli</a>  | tufA | valS |
| P39177 | <a href="#">eftu1_ecoli</a> | <a href="#">uspG_ecoli</a> | tufA | uspG |
| P00944 | <a href="#">eftu1_ecoli</a> | <a href="#">xyla_ecoli</a> | tufA | xylA |
| P0A8I3 | <a href="#">eftu1_ecoli</a> | <a href="#">yaaa_ecoli</a> | tufA | yaaA |
| P0A8J4 | <a href="#">eftu1_ecoli</a> | <a href="#">ybed_ecoli</a> | tufA | ybeD |
| P77552 | <a href="#">eftu1_ecoli</a> | <a href="#">ydhq_ecoli</a> | tufA | ydhQ |

|        |                            |                            |      |      |
|--------|----------------------------|----------------------------|------|------|
| P0A6X3 | <a href="#">elab_ecoli</a> | <a href="#">hfq_ecoli</a>  | elaB | hfq  |
| P60422 | <a href="#">elab_ecoli</a> | <a href="#">rl2_ecoli</a>  | elaB | rplB |
| P0A7L3 | <a href="#">elab_ecoli</a> | <a href="#">rl20_ecoli</a> | elaB | rplT |
| P21338 | <a href="#">elab_ecoli</a> | <a href="#">rni_ecoli</a>  | elaB | rna  |
| P0A7V8 | <a href="#">elab_ecoli</a> | <a href="#">rs4_ecoli</a>  | elaB | rpsD |

|        |                            |                            |      |      |
|--------|----------------------------|----------------------------|------|------|
| P00963 | <a href="#">engd_ecoli</a> | <a href="#">asna_ecoli</a> | engD | asnA |
| P0A6B7 | <a href="#">engd_ecoli</a> | <a href="#">iscs_ecoli</a> | engD | iscS |
| P62620 | <a href="#">engd_ecoli</a> | <a href="#">ispG_ecoli</a> | engD | ispG |
| P0ACP7 | <a href="#">engd_ecoli</a> | <a href="#">purr_ecoli</a> | engD | purR |
| P46850 | <a href="#">engd_ecoli</a> | <a href="#">rtcB_ecoli</a> | engD | rtcB |
| P0AG14 | <a href="#">engd_ecoli</a> | <a href="#">sohb_ecoli</a> | engD | sohB |

|        |                           |                            |     |      |
|--------|---------------------------|----------------------------|-----|------|
| P00888 | <a href="#">eno_ecoli</a> | <a href="#">arof_ecoli</a> | eno | aroF |
| P0A6Y8 | <a href="#">eno_ecoli</a> | <a href="#">dnak_ecoli</a> | eno | dnaK |
| P0A6Y8 | <a href="#">eno_ecoli</a> | <a href="#">dnak_ecoli</a> | eno | dnaK |
| P0A6Q6 | <a href="#">eno_ecoli</a> | <a href="#">fabz_ecoli</a> | eno | fabZ |
| P0A6F3 | <a href="#">eno_ecoli</a> | <a href="#">glpk_ecoli</a> | eno | glpK |
| P18843 | <a href="#">eno_ecoli</a> | <a href="#">nade_ecoli</a> | eno | nadE |
| P0A761 | <a href="#">eno_ecoli</a> | <a href="#">nane_ecoli</a> | eno | nanE |
| P0ADI0 | <a href="#">eno_ecoli</a> | <a href="#">pinr_ecoli</a> | eno | pinR |
| P05055 | <a href="#">eno_ecoli</a> | <a href="#">pnp_ecoli</a>  | eno | pnp  |
| P05055 | <a href="#">eno_ecoli</a> | <a href="#">pnp_ecoli</a>  | eno | pnp  |
| P76062 | <a href="#">eno_ecoli</a> | <a href="#">racr_ecoli</a> | eno | racR |
| P36767 | <a href="#">eno_ecoli</a> | <a href="#">rdgc_ecoli</a> | eno | rdgC |
| P0ADZ0 | <a href="#">eno_ecoli</a> | <a href="#">rl23_ecoli</a> | eno | rplW |
| P0A7R1 | <a href="#">eno_ecoli</a> | <a href="#">rl9_ecoli</a>  | eno | rplI |
| P21513 | <a href="#">eno_ecoli</a> | <a href="#">rne_ecoli</a>  | eno | rne  |

|        |            |             |      |      |
|--------|------------|-------------|------|------|
| P21513 | eno_ecoli  | rne_ecoli   | eno  | rne  |
| P21513 | eno_ecoli  | rne_ecoli   | eno  | rne  |
| P21513 | eno_ecoli  | rne_ecoli   | eno  | rne  |
| P0A7W1 | eno_ecoli  | rs5_ecoli   | eno  | rpsE |
| P04805 | eno_ecoli  | syecoli     | eno  | gltX |
| P77216 | eno_ecoli  | ybdn_ecoli  | eno  | ybdN |
| P76536 | eno_ecoli  | yfex_ecoli  | eno  | yfeX |
| P77247 | eno_ecoli  | ynic_ecoli  | eno  | yniC |
| Q47710 | eno_ecoli  | yqjk_ecoli  | eno  | yqjK |
| P76038 | envr_ecoli | puud_ecoli  | envR | puuD |
| P0A6L0 | eutq_ecoli | deoc_ecoli  | eutQ | deoC |
| P30147 | eutq_ecoli | hyi_ecoli   | eutQ | hyi  |
| P31678 | eutq_ecoli | otsb_ecoli  | eutQ | otsB |
| P60723 | eutq_ecoli | rl4_ecoli   | eutQ | rplD |
| P0A8I8 | eutq_ecoli | rlmh_ecoli  | eutQ | rlmH |
| P0A9K9 | eutq_ecoli | slyd_ecoli  | eutQ | slyD |
| P0ABD5 | faba_ecoli | acca_ecoli  | fabA | accA |
| P00722 | faba_ecoli | bgal_ecoli  | fabA | lacZ |
| P0ACF0 | faba_ecoli | dbha_ecoli  | fabA | hupA |
| P0A9P6 | faba_ecoli | dead_ecoli  | fabA | deaD |
| P0CE47 | faba_ecoli | eftu1_ecoli | fabA | tufA |
| P0A817 | faba_ecoli | metk_ecoli  | fabA | metK |
| P0AFG6 | faba_ecoli | odo2_ecoli  | fabA | sucB |
| P0A7L0 | faba_ecoli | rl1_ecoli   | fabA | rplA |
| P0A7K6 | faba_ecoli | rl19_ecoli  | fabA | rplS |
| P60422 | faba_ecoli | rl2_ecoli   | fabA | rplB |
| P0A8V2 | faba_ecoli | rpob_ecoli  | fabA | rpoB |
| P0A8T7 | faba_ecoli | rpoc_ecoli  | fabA | rpoC |
| P0AG67 | faba_ecoli | rs1_ecoli   | fabA | rpsA |
| P0A7S9 | faba_ecoli | rs13_ecoli  | fabA | rpsM |
| P0A7T7 | faba_ecoli | rs18_ecoli  | fabA | rpsR |
| P0A7V0 | faba_ecoli | rs2_ecoli   | fabA | rpsB |
| P0A7W1 | faba_ecoli | rs5_ecoli   | fabA | rpsE |
| P02359 | faba_ecoli | rs7_ecoli   | fabA | rpsG |
| P0A7X3 | faba_ecoli | rs9_ecoli   | fabA | rpsI |
| P0AGD7 | faba_ecoli | srp54_ecoli | fabA | ffh  |
| P04968 | faba_ecoli | thd1_ecoli  | fabA | ilvA |
| P0A850 | faba_ecoli | tig_ecoli   | fabA | tig  |
| P76214 | faba_ecoli | ves_ecoli   | fabA | ves  |
| P28915 | faba_ecoli | ybfc_ecoli  | fabA | ybfC |

|        |            |             |      |      |
|--------|------------|-------------|------|------|
| P76515 | faba_ecoli | yfds_ecoli  | fabA | yfdS |
| P65807 | faba_ecoli | ygey_ecoli  | fabA | ygeY |
| P0AB93 | fabb_ecoli | arsb_ecoli  | fabB | arsB |
| P31658 | fabb_ecoli | hcha_ecoli  | fabB | hchA |
| P60422 | fabb_ecoli | rl2_ecoli   | fabB | rplB |
| P75792 | fabb_ecoli | suph_ecoli  | fabB | supH |
| P75970 | fabb_ecoli | vxis_ecoli  | fabB | xisE |
| P0AD53 | fabb_ecoli | ygac_ecoli  | fabB | ygaC |
| P0A9V5 | fabb_ecoli | yiag_ecoli  | fabB | yiaG |
| P18843 | fabd_ecoli | nade_ecoli  | fabD | nadE |
| P25906 | fabd_ecoli | ydbc_ecoli  | fabD | ydbC |
| P0A6A8 | fabf_ecoli | acp_ecoli   | fabF | acpP |
| P28248 | fabf_ecoli | dcd_ecoli   | fabF | dcd  |
| P0A6Y8 | fabf_ecoli | dnak_ecoli  | fabF | dnaK |
| P0A6Y8 | fabf_ecoli | dnak_ecoli  | fabF | dnaK |
| P0AAL3 | fabf_ecoli | napg_ecoli  | fabF | napG |
| P17411 | fabg_ecoli | chbf_ecoli  | fabG | chbF |
| P21693 | fabg_ecoli | dbpa_ecoli  | fabG | dbpA |
| P13035 | fabg_ecoli | glpd_ecoli  | fabG | glpD |
| P31473 | fabg_ecoli | rava_ecoli  | fabG | ravA |
| P06961 | fabh_ecoli | cca_ecoli   | fabH | cca  |
| P37326 | fabh_ecoli | ints_ecoli  | fabH | intS |
| P18843 | fabh_ecoli | nade_ecoli  | fabH | nadE |
| P0A988 | fabi_ecoli | dpo3b_ecoli | fabI | dnaN |
| P0AG30 | fabi_ecoli | rho_ecoli   | fabI | rho  |
| P0A7J3 | fabi_ecoli | rl10_ecoli  | fabI | rplJ |
| P75864 | fabi_ecoli | rlm1_ecoli  | fabI | rlmL |
| P0AG67 | fabi_ecoli | rs1_ecoli   | fabI | rpsA |
| P0A7R5 | fabi_ecoli | rs10_ecoli  | fabI | rpsJ |
| P76573 | fabi_ecoli | yfgi_ecoli  | fabI | yfgI |
| P0AF90 | fabi_ecoli | yjgd_ecoli  | fabI | yjgD |
| P0ABH9 | fabz_ecoli | clpa_ecoli  | fabZ | clpA |
| P0CE47 | fabz_ecoli | eftu1_ecoli | fabZ | tufA |
| P75882 | fabz_ecoli | gfcD_ecoli  | fabZ | gfcD |
| P0A9M0 | fabz_ecoli | lon_ecoli   | fabZ | lon  |
| P0A7L0 | fabz_ecoli | rl1_ecoli   | fabZ | rplA |

|        |            |             |      |      |
|--------|------------|-------------|------|------|
| P0A7J3 | fabz_ecoli | rl10_ecoli  | fabZ | rplJ |
| P0AA10 | fabz_ecoli | rl13_ecoli  | fabZ | rplM |
| P0A7K6 | fabz_ecoli | rl19_ecoli  | fabZ | rplS |
| P60422 | fabz_ecoli | rl2_ecoli   | fabZ | rplB |
| P61175 | fabz_ecoli | rl22_ecoli  | fabZ | rplV |
| P60438 | fabz_ecoli | rl3_ecoli   | fabZ | rplC |
| P60723 | fabz_ecoli | rl4_ecoli   | fabZ | rplD |
| P62399 | fabz_ecoli | rl5_ecoli   | fabZ | rplE |
| P0AG55 | fabz_ecoli | rl6_ecoli   | fabZ | rplF |
| P0A7R1 | fabz_ecoli | rl9_ecoli   | fabZ | rplI |
| P0AG67 | fabz_ecoli | rs1_ecoli   | fabZ | rpsA |
| P0A7V0 | fabz_ecoli | rs2_ecoli   | fabZ | rpsB |
| P0A7V3 | fabz_ecoli | rs3_ecoli   | fabZ | rpsC |
| P0A7V8 | fabz_ecoli | rs4_ecoli   | fabZ | rpsD |
| P0A7W1 | fabz_ecoli | rs5_ecoli   | fabZ | rpsE |
| P02359 | fabz_ecoli | rs7_ecoli   | fabZ | rpsG |
| P0AGD7 | fabz_ecoli | srp54_ecoli | fabZ | ffh  |
| P00962 | fabz_ecoli | syq_ecoli   | fabZ | glnS |
| P16694 | fabz_ecoli | yjda_ecoli  | fabZ | yjdA |

|        |            |             |      |      |
|--------|------------|-------------|------|------|
| P61517 | fdhe_ecoli | can_ecoli   | fdhE | can  |
| P76290 | fdhe_ecoli | cmoa_ecoli  | fdhE | cmoA |
| P10443 | fdhe_ecoli | dpo3a_ecoli | fdhE | dnaE |
| P32176 | fdhe_ecoli | fdog_ecoli  | fdhE | fdoG |
| P0AER3 | fdhe_ecoli | gtj_ecoli   | fdhE | gtJ  |
| P63228 | fdhe_ecoli | gmhb_ecoli  | fdhE | gmhB |
| P0AES4 | fdhe_ecoli | gyra_ecoli  | fdhE | gyrA |
| P0ACV0 | fdhe_ecoli | htrb_ecoli  | fdhE | htrB |
| P45395 | fdhe_ecoli | kdsd_ecoli  | fdhE | kdsD |
| P18843 | fdhe_ecoli | nade_ecoli  | fdhE | nadE |
| P0ADY3 | fdhe_ecoli | rl14_ecoli  | fdhE | rplN |
| P0AG44 | fdhe_ecoli | rl17_ecoli  | fdhE | rplQ |
| P61175 | fdhe_ecoli | rl22_ecoli  | fdhE | rplV |
| P62399 | fdhe_ecoli | rl5_ecoli   | fdhE | rplE |
| P0AG55 | fdhe_ecoli | rl6_ecoli   | fdhE | rplF |
| P02359 | fdhe_ecoli | rs7_ecoli   | fdhE | rpsG |
| P0A7X3 | fdhe_ecoli | rs9_ecoli   | fdhE | rplI |
| P0A9K9 | fdhe_ecoli | slyd_ecoli  | fdhE | slyD |
| P10443 | fdng_ecoli | dpo3a_ecoli | fdnG | dnaE |
| P0CE47 | fdng_ecoli | eftu1_ecoli | fdnG | tufA |



|        |                           |                            |     |      |
|--------|---------------------------|----------------------------|-----|------|
| P0ACF0 | <a href="#">fis_ecoli</a> | <a href="#">dbha_ecoli</a> | fis | hupA |
| P0A6Y8 | <a href="#">fis_ecoli</a> | <a href="#">dnak_ecoli</a> | fis | dnaK |
| P0AA10 | <a href="#">fis_ecoli</a> | <a href="#">rl13_ecoli</a> | fis | rplM |
| P0A7K6 | <a href="#">fis_ecoli</a> | <a href="#">rl19_ecoli</a> | fis | rplS |
| P60422 | <a href="#">fis_ecoli</a> | <a href="#">rl2_ecoli</a>  | fis | rplB |
| P0A7L3 | <a href="#">fis_ecoli</a> | <a href="#">rl20_ecoli</a> | fis | rplT |
| P61175 | <a href="#">fis_ecoli</a> | <a href="#">rl22_ecoli</a> | fis | rplV |
| P0ADZ0 | <a href="#">fis_ecoli</a> | <a href="#">rl23_ecoli</a> | fis | rplW |
| P60438 | <a href="#">fis_ecoli</a> | <a href="#">rl3_ecoli</a>  | fis | rplC |
| P0A7N9 | <a href="#">fis_ecoli</a> | <a href="#">rl33_ecoli</a> | fis | rpmG |
| P60723 | <a href="#">fis_ecoli</a> | <a href="#">rl4_ecoli</a>  | fis | rplD |
| P0A8T7 | <a href="#">fis_ecoli</a> | <a href="#">rpoc_ecoli</a> | fis | rpoC |
| P0A7R5 | <a href="#">fis_ecoli</a> | <a href="#">rs10_ecoli</a> | fis | rpsJ |
| P0A7S9 | <a href="#">fis_ecoli</a> | <a href="#">rs13_ecoli</a> | fis | rpsM |
| P0A7V0 | <a href="#">fis_ecoli</a> | <a href="#">rs2_ecoli</a>  | fis | rpsB |
| P0A7V3 | <a href="#">fis_ecoli</a> | <a href="#">rs3_ecoli</a>  | fis | rpsC |
| P0A7V8 | <a href="#">fis_ecoli</a> | <a href="#">rs4_ecoli</a>  | fis | rpsD |
| P0A7W1 | <a href="#">fis_ecoli</a> | <a href="#">rs5_ecoli</a>  | fis | rpsE |
| P30139 | <a href="#">fis_ecoli</a> | <a href="#">thig_ecoli</a> | fis | thiG |
| P75989 | <a href="#">fis_ecoli</a> | <a href="#">ycge_ecoli</a> | fis | ycgE |

|        |                            |                            |      |      |
|--------|----------------------------|----------------------------|------|------|
| P0A6F1 | <a href="#">fkba_ecoli</a> | <a href="#">cara_ecoli</a> | fkpA | carA |
| P10378 | <a href="#">fkba_ecoli</a> | <a href="#">ente_ecoli</a> | fkpA | entE |
| P04994 | <a href="#">fkba_ecoli</a> | <a href="#">ex7l_ecoli</a> | fkpA | xseA |
| P10441 | <a href="#">fkba_ecoli</a> | <a href="#">lpxb_ecoli</a> | fkpA | lpxB |
| P77432 | <a href="#">fkba_ecoli</a> | <a href="#">lsrk_ecoli</a> | fkpA | lsrK |
| P0AEZ3 | <a href="#">fkba_ecoli</a> | <a href="#">mind_ecoli</a> | fkpA | minD |
| P0A7V8 | <a href="#">fkba_ecoli</a> | <a href="#">rs4_ecoli</a>  | fkpA | rpsD |
| P75869 | <a href="#">fkba_ecoli</a> | <a href="#">sxy_ecoli</a>  | fkpA | sxy  |
| P0A9W0 | <a href="#">fkba_ecoli</a> | <a href="#">ular_ecoli</a> | fkpA | ulaR |
| P77147 | <a href="#">fkba_ecoli</a> | <a href="#">ydht_ecoli</a> | fkpA | ydhT |
| P76440 | <a href="#">fkba_ecoli</a> | <a href="#">yeit_ecoli</a> | fkpA | yeiT |
| Q46927 | <a href="#">fkba_ecoli</a> | <a href="#">ygdL_ecoli</a> | fkpA | ygdL |
| P77396 | <a href="#">fkba_ecoli</a> | <a href="#">ypdc_ecoli</a> | fkpA | ypdC |

|        |                            |                            |      |      |
|--------|----------------------------|----------------------------|------|------|
| P0ADI4 | <a href="#">fkbb_ecoli</a> | <a href="#">entb_ecoli</a> | fkIB | entB |
| P0AERO | <a href="#">fkbb_ecoli</a> | <a href="#">glpf_ecoli</a> | fkIB | glpF |
| P0AAE2 | <a href="#">fkbb_ecoli</a> | <a href="#">proy_ecoli</a> | fkIB | proY |
| P0AFZ7 | <a href="#">fkbb_ecoli</a> | <a href="#">trkh_ecoli</a> | fkIB | trkH |



|        |            |             |      |      |
|--------|------------|-------------|------|------|
| P33224 | flav_ecoli | aidb_ecoli  | fldA | aidB |
| P0ABH9 | flav_ecoli | clpa_ecoli  | fldA | clpA |
| P0A988 | flav_ecoli | dpo3b_ecoli | fldA | dnaN |
| P0A8V6 | flav_ecoli | fadr_ecoli  | fldA | fadR |
| P15038 | flav_ecoli | held_ecoli  | fldA | held |
| P0ACF8 | flav_ecoli | hns_ecoli   | fldA | hns  |
| P0A9P9 | flav_ecoli | idno_ecoli  | fldA | idnO |
| P62620 | flav_ecoli | ispg_ecoli  | fldA | ispG |
| P0A9M0 | flav_ecoli | lon_ecoli   | fldA | lon  |
| P0A772 | flav_ecoli | nrDI_ecoli  | fldA | nrDI |
| P0A7J0 | flav_ecoli | ribB_ecoli  | fldA | ribB |
| P60422 | flav_ecoli | rl2_ecoli   | fldA | rplB |
| P61175 | flav_ecoli | rl22_ecoli  | fldA | rplV |
| P0A7M2 | flav_ecoli | rl28_ecoli  | fldA | rpmB |
| P0A7V0 | flav_ecoli | rs2_ecoli   | fldA | rpsB |
| P0A7W1 | flav_ecoli | rs5_ecoli   | fldA | rpsE |
| P0AG24 | flav_ecoli | spot_ecoli  | fldA | spoT |
| P0AG03 | flav_ecoli | ubix_ecoli  | fldA | ubiX |

|        |            |            |      |      |
|--------|------------|------------|------|------|
| P12999 | flic_ecoli | bioc_ecoli | fliC | bioC |
| P0A6Y8 | flic_ecoli | dnak_ecoli | fliC | dnaK |
| Q47153 | flic_ecoli | fhia_ecoli | fliC | fhiA |
| P18843 | flic_ecoli | nade_ecoli | fliC | nadE |
| P21889 | flic_ecoli | syd_ecoli  | fliC | aspS |
| P16659 | flic_ecoli | syp_ecoli  | fliC | proS |

|        |            |            |      |      |
|--------|------------|------------|------|------|
| P06974 | flin_ecoli | flim_ecoli | fliN | fliM |
| P06974 | flin_ecoli | flim_ecoli | fliN | fliM |
| P15070 | flin_ecoli | flin_ecoli | fliN | fliN |

|        |            |            |      |      |
|--------|------------|------------|------|------|
| P07363 | flit_ecoli | chea_ecoli | fliT | cheA |
| P0AEM4 | flit_ecoli | flgm_ecoli | fliT | flgM |
| P0A8S9 | flit_ecoli | flhd_ecoli | fliT | flhD |
| P24216 | flit_ecoli | flid_ecoli | fliT | fliD |
| P26608 | flit_ecoli | flis_ecoli | fliT | fliS |
| P0ABY2 | flit_ecoli | flit_ecoli | fliT | fliT |
| P0AG07 | flit_ecoli | rpe_ecoli  | fliT | rpe  |
| P39280 | flit_ecoli | yjek_ecoli | fliT | yjeK |

|        |           |            |     |      |
|--------|-----------|------------|-----|------|
| P25741 | fmt_ecoli | rfap_ecoli | fmt | rfaP |
| P0A7L0 | fmt_ecoli | rl1_ecoli  | fmt | rplA |
| P0AG44 | fmt_ecoli | rl17_ecoli | fmt | rplQ |
| P60723 | fmt_ecoli | rl4_ecoli  | fmt | rplD |

|        |            |             |      |      |
|--------|------------|-------------|------|------|
| P0A7R1 | fmt_ecoli  | rl9_ecoli   | fmt  | rplI |
| P0A7S9 | fmt_ecoli  | rs13_ecoli  | fmt  | rpsM |
| P0A7V8 | fmt_ecoli  | rs4_ecoli   | fmt  | rpsD |
| P02359 | fmt_ecoli  | rs7_ecoli   | fmt  | rpsG |
| P0A7X3 | fmt_ecoli  | rs9_ecoli   | fmt  | rpsI |
| P76154 | fmt_ecoli  | ydfk_ecoli  | fmt  | ydfK |
| P76073 | fmt_ecoli  | ynae_ecoli  | fmt  | ynaE |
| P0A717 | fnr_ecoli  | kprs_ecoli  | fnr  | prs  |
| P77188 | fnr_ecoli  | matc_ecoli  | fnr  | matC |
| P18843 | fnr_ecoli  | nade_ecoli  | fnr  | nadE |
| P0AFJ5 | fnr_ecoli  | phob_ecoli  | fnr  | phoB |
| P76122 | folb_ecoli | yddj_ecoli  | folB | yddJ |
| P0A948 | folx_ecoli | rimj_ecoli  | folX | rimJ |
| P68767 | frda_ecoli | ampa_ecoli  | frdA | pepA |
| P23886 | frda_ecoli | cydc_ecoli  | frdA | cydC |
| P0AC47 | frda_ecoli | frdb_ecoli  | frdA | frdB |
| P0AC47 | frda_ecoli | frdb_ecoli  | frdA | frdB |
| P0AC47 | frda_ecoli | frdb_ecoli  | frdA | frdB |
| P0AC47 | frda_ecoli | frdb_ecoli  | frdA | frdB |
| P0A8Q0 | frda_ecoli | frdc_ecoli  | frdA | frdC |
| P0A8Q0 | frda_ecoli | frdc_ecoli  | frdA | frdC |
| P0A8Q0 | frda_ecoli | frdc_ecoli  | frdA | frdC |
| P0A8Q3 | frda_ecoli | frdd_ecoli  | frdA | frdD |
| P0A8Q3 | frda_ecoli | frdd_ecoli  | frdA | frdD |
| P0A8Q3 | frda_ecoli | frdd_ecoli  | frdA | frdD |
| P0AFG9 | frda_ecoli | odp1_eco57  | frdA | aceE |
| P0A915 | frda_ecoli | ompw_ecoli  | frdA | ompW |
| P16916 | frda_ecoli | rhasa_ecoli | frdA | rhaA |
| P37194 | frda_ecoli | slp_ecoli   | frdA | slp  |
| P75818 | frda_ecoli | ybjp_ecoli  | frdA | ybjP |
| P76111 | frda_ecoli | ydcz_ecoli  | frdA | ydcZ |
| P77804 | frda_ecoli | ydga_ecoli  | frdA | ydgA |
| P39385 | frda_ecoli | yjin_ecoli  | frdA | yjiN |
| P00363 | frdb_ecoli | frda_ecoli  | frdB | frdA |
| P0AE08 | fre_ecoli  | ahpc_ecoli  | fre  | ahpC |
| P0ABB4 | fre_ecoli  | atpb_ecoli  | fre  | atpD |
| P37326 | fre_ecoli  | ints_ecoli  | fre  | intS |
| P18843 | fre_ecoli  | nade_ecoli  | fre  | nadE |
| P37906 | fre_ecoli  | puub_ecoli  | fre  | puuB |

|        |            |             |      |      |
|--------|------------|-------------|------|------|
| P0AG30 | fre_ecoli  | rho_ecoli   | fre  | rho  |
| P0AG55 | fre_ecoli  | rl6_ecoli   | fre  | rpIF |
| P14294 | frlr_ecoli | top3_ecoli  | frlR | topB |
| P13035 | frma_ecoli | glpd_ecoli  | frmA | glpD |
| P25888 | frma_ecoli | rhle_ecoli  | frmA | rhIE |
| P39389 | frma_ecoli | yjir_ecoli  | frmA | yjiR |
| P13035 | frmr_ecoli | glpd_ecoli  | frmR | glpD |
| P69441 | frmr_ecoli | kad_ecoli   | frmR | adk  |
| P0ABH0 | ftsq_ecoli | ftsa_ecoli  | ftsQ | ftsA |
| P0A6S5 | ftsq_ecoli | ftsb_ecoli  | ftsQ | ftsB |
| P0AD68 | ftsq_ecoli | ftsi_ecoli  | ftsQ | ftsI |
| P0AEN4 | ftsq_ecoli | ftsl_ecoli  | ftsQ | ftsL |
| P06136 | ftsq_ecoli | ftsq_ecoli  | ftsQ | ftsQ |
| P0ABH0 | ftsx_ecoli | ftsa_ecoli  | ftsX | ftsA |
| P06136 | ftsx_ecoli | ftsq_ecoli  | ftsX | ftsQ |
| P06136 | ftsx_ecoli | ftsq_ecoli  | ftsX | ftsQ |
| P22333 | ftsZ_ecoli | add_ecoli   | ftsZ | add  |
| P0A6Y8 | ftsZ_ecoli | dnak_ecoli  | ftsZ | dnak |
| P0A6M8 | ftsZ_ecoli | efg_ecoli   | ftsZ | fusA |
| P0CE47 | ftsZ_ecoli | eftu1_ecoli | ftsZ | tufA |
| P0ABH0 | ftsZ_ecoli | ftsa_ecoli  | ftsZ | ftsA |
| P0A9R7 | ftsZ_ecoli | ftse_ecoli  | ftsZ | ftsE |
| P46889 | ftsZ_ecoli | ftsk_ecoli  | ftsZ | ftsK |
| P0C8J6 | ftsZ_ecoli | gaty_ecoli  | ftsZ | gatY |
| P68187 | ftsZ_ecoli | malk_ecoli  | ftsZ | malk |
| P0A738 | ftsZ_ecoli | moac_ecoli  | ftsZ | moaC |
| P0A9X4 | ftsZ_ecoli | mreb_ecoli  | ftsZ | mreB |
| P09373 | ftsZ_ecoli | pflb_ecoli  | ftsZ | pflB |
| P0AAH0 | ftsZ_ecoli | pstb_ecoli  | ftsZ | pstB |
| P0A7G6 | ftsZ_ecoli | reca_ecoli  | ftsZ | recA |
| P0ADY3 | ftsZ_ecoli | rl14_ecoli  | ftsZ | rpIN |
| P62399 | ftsZ_ecoli | rl5_ecoli   | ftsZ | rpIE |
| P0A7R5 | ftsZ_ecoli | rs10_ecoli  | ftsZ | rpsJ |
| P0A7V0 | ftsZ_ecoli | rs2_ecoli   | ftsZ | rpsB |
| P0A7V8 | ftsZ_ecoli | rs4_ecoli   | ftsZ | rpsD |
| P0A7W1 | ftsZ_ecoli | rs5_ecoli   | ftsZ | rpsE |
| P10408 | ftsZ_ecoli | seca_ecoli  | ftsZ | secA |

|        |            |            |      |      |
|--------|------------|------------|------|------|
| P0AFZ5 | ftsZ_ecoli | sula_ecoli | ftsZ | sulA |
| P0A843 | ftsZ_ecoli | tate_ecoli | ftsZ | tatE |
| P39177 | ftsZ_ecoli | uspg_ecoli | ftsZ | uspG |
| P31063 | ftsZ_ecoli | yedd_ecoli | ftsZ | yedD |
| P77173 | ftsZ_ecoli | zipa_ecoli | ftsZ | zipA |
| P0A9P0 | fucm_ecoli | dldh_ecoli | fucU | lpdA |
| P0AA10 | fucm_ecoli | rl13_ecoli | fucU | rpIM |
| P61175 | fucm_ecoli | rl22_ecoli | fucU | rpIV |
| P0A7K2 | fucm_ecoli | rl7_ecoli  | fucU | rpIL |
| P14407 | fuma_ecoli | fumb_ecoli | fumA | fumB |
| P18843 | fuma_ecoli | nade_ecoli | fumA | nadE |
| P0AC33 | fumb_ecoli | fuma_ecoli | fumB | fumA |
| P0AFG8 | fumb_ecoli | odp1_ecoli | fumB | aceE |
| P18843 | fur_ecoli  | nade_ecoli | fur  | nadE |
| P63284 | fxsa_ecoli | clpb_ecoli | fxsA | clpB |
| P0A6W5 | fxsa_ecoli | greA_ecoli | fxsA | greA |
| P62399 | fxsa_ecoli | rl5_ecoli  | fxsA | rpIE |
| P0AE88 | g3p1_ecoli | cpxr_ecoli | gapA | cpxR |
| P0A6Y8 | g3p1_ecoli | dnak_ecoli | gapA | dnaK |
| P0A6Y8 | g3p1_ecoli | dnak_ecoli | gapA | dnaK |
| POC8J8 | g3p1_ecoli | gatz_ecoli | gapA | gatZ |
| P0A7Z4 | g3p1_ecoli | rpoa_ecoli | gapA | rpoA |
| P0A8V2 | g3p1_ecoli | rpob_ecoli | gapA | rpoB |
| P0A8T7 | g3p1_ecoli | rpoc_ecoli | gapA | rpoC |
| P00579 | g3p1_ecoli | rpod_ecoli | gapA | rpoD |
| P52125 | g3p1_ecoli | yfjj_ecoli | gapA | yfjJ |
| P0A6Y8 | g6pd_ecoli | dnak_ecoli | zwf  | dnaK |
| P0AFF6 | g6pd_ecoli | nusa_ecoli | zwf  | nusA |
| P15288 | g6pd_ecoli | pepd_ecoli | zwf  | pepD |
| P36938 | g6pd_ecoli | pgm_ecoli  | zwf  | pgm  |
| P0A6F5 | gadx_ecoli | ch60_ecoli | gadX | groL |
| P37014 | gadx_ecoli | yfad_ecoli | gadX | yfaD |

|        |                            |                             |      |      |
|--------|----------------------------|-----------------------------|------|------|
| P18843 | <a href="#">gale_ecoli</a> | <a href="#">nade_ecoli</a>  | galE | nadE |
| P0AA43 | <a href="#">gale_ecoli</a> | <a href="#">rsua_ecoli</a>  | galE | rsuA |
| P77775 | <a href="#">gale_ecoli</a> | <a href="#">yfch_ecoli</a>  | galE | yfch |
| P76205 | <a href="#">galf_ecoli</a> | <a href="#">arpb_ecoli</a>  | galF | arpB |
| P0ABB4 | <a href="#">galf_ecoli</a> | <a href="#">atpb_ecoli</a>  | galF | atpD |
| P06282 | <a href="#">galf_ecoli</a> | <a href="#">cdh_ecoli</a>   | galF | cdh  |
| P0A6F5 | <a href="#">galf_ecoli</a> | <a href="#">ch60_ecoli</a>  | galF | groL |
| P77463 | <a href="#">galf_ecoli</a> | <a href="#">ddpc_ecoli</a>  | galF | ddpC |
| P0ABT2 | <a href="#">galf_ecoli</a> | <a href="#">dps_ecoli</a>   | galF | dps  |
| P0AEP3 | <a href="#">galf_ecoli</a> | <a href="#">galu_ecoli</a>  | galF | galU |
| P18843 | <a href="#">galf_ecoli</a> | <a href="#">nade_ecoli</a>  | galF | nadE |
| P0A6Y8 | <a href="#">galm_ecoli</a> | <a href="#">dnak_ecoli</a>  | galM | dnaK |
| P62707 | <a href="#">galm_ecoli</a> | <a href="#">gpma_ecoli</a>  | galM | gpmA |
| P18843 | <a href="#">galm_ecoli</a> | <a href="#">nade_ecoli</a>  | galM | nadE |
| P69228 | <a href="#">gatd_ecoli</a> | <a href="#">baer_ecoli</a>  | gatD | baeR |
| P0AEC5 | <a href="#">gatd_ecoli</a> | <a href="#">bara_ecoli</a>  | gatD | barA |
| P0A6F5 | <a href="#">gatd_ecoli</a> | <a href="#">ch60_ecoli</a>  | gatD | groL |
| P0A6Y8 | <a href="#">gatd_ecoli</a> | <a href="#">dnak_ecoli</a>  | gatD | dnaK |
| P13035 | <a href="#">gatd_ecoli</a> | <a href="#">glpd_ecoli</a>  | gatD | glpD |
| P22523 | <a href="#">gatd_ecoli</a> | <a href="#">mukb_ecoli</a>  | gatD | mukB |
| P18843 | <a href="#">gatd_ecoli</a> | <a href="#">nade_ecoli</a>  | gatD | nadE |
| P33602 | <a href="#">gatd_ecoli</a> | <a href="#">nuog_ecoli</a>  | gatD | nuoG |
| P02918 | <a href="#">gatd_ecoli</a> | <a href="#">pbpa_ecoli</a>  | gatD | mrcA |
| P60422 | <a href="#">gatd_ecoli</a> | <a href="#">rl2_ecoli</a>   | gatD | rplB |
| P0A7V0 | <a href="#">gatd_ecoli</a> | <a href="#">rs2_ecoli</a>   | gatD | rpsB |
| P0A7V3 | <a href="#">gatd_ecoli</a> | <a href="#">rs3_ecoli</a>   | gatD | rpsC |
| P0A7X3 | <a href="#">gatd_ecoli</a> | <a href="#">rs9_ecoli</a>   | gatD | rpsI |
| P06612 | <a href="#">gatd_ecoli</a> | <a href="#">top1_ecoli</a>  | gatD | topA |
| P76403 | <a href="#">gatd_ecoli</a> | <a href="#">yegq_ecoli</a>  | gatD | yegQ |
| P0A6Y8 | <a href="#">gaty_ecoli</a> | <a href="#">dnak_ecoli</a>  | gatY | dnaK |
| P0A6Y8 | <a href="#">gaty_ecoli</a> | <a href="#">dnak_ecoli</a>  | gatY | dnaK |
| P0CE47 | <a href="#">gaty_ecoli</a> | <a href="#">eftu1_ecoli</a> | gatY | tufA |
| P0CE47 | <a href="#">gaty_ecoli</a> | <a href="#">eftu1_ecoli</a> | gatY | tufA |
| P06993 | <a href="#">gaty_ecoli</a> | <a href="#">malt_ecoli</a>  | gatY | malT |
| P07649 | <a href="#">gaty_ecoli</a> | <a href="#">trua_ecoli</a>  | gatY | truA |
| P0A6F5 | <a href="#">gatz_ecoli</a> | <a href="#">ch60_ecoli</a>  | gatZ | groL |

|        |                            |                            |      |      |
|--------|----------------------------|----------------------------|------|------|
| P0A6T1 | <a href="#">gatz_ecoli</a> | <a href="#">g6pi_ecoli</a> | gatz | pgi  |
| P0C8J6 | <a href="#">gatz_ecoli</a> | <a href="#">gaty_ecoli</a> | gatz | gatY |
| P77188 | <a href="#">gcsp_ecoli</a> | <a href="#">matc_ecoli</a> | gcvP | matC |
| P18843 | <a href="#">gcsp_ecoli</a> | <a href="#">nade_ecoli</a> | gcvP | nadE |
| P76577 | <a href="#">gcsp_ecoli</a> | <a href="#">pbpc_ecoli</a> | gcvP | pbpC |
| P37051 | <a href="#">gcsp_ecoli</a> | <a href="#">puru_ecoli</a> | gcvP | purU |
| P0A7M9 | <a href="#">gcsp_ecoli</a> | <a href="#">rl31_ecoli</a> | gcvP | rpmE |
| P0A8V2 | <a href="#">gcsp_ecoli</a> | <a href="#">rpob_ecoli</a> | gcvP | rpoB |
| P10408 | <a href="#">gcsp_ecoli</a> | <a href="#">seca_ecoli</a> | gcvP | secA |
| P76578 | <a href="#">gcsp_ecoli</a> | <a href="#">yfhm_ecoli</a> | gcvP | yfhM |
| P0A894 | <a href="#">gcsp_ecoli</a> | <a href="#">yhbj_ecoli</a> | gcvP | yhbj |
| P45565 | <a href="#">gcst_ecoli</a> | <a href="#">ais_ecoli</a>  | gcvT | ais  |
| Q46829 | <a href="#">gcst_ecoli</a> | <a href="#">bgla_ecoli</a> | gcvT | bgIA |
| P0AAJ3 | <a href="#">gcst_ecoli</a> | <a href="#">fdnh_ecoli</a> | gcvT | fdnH |
| P0AEK7 | <a href="#">gcst_ecoli</a> | <a href="#">fdni_ecoli</a> | gcvT | fdnI |
| P09373 | <a href="#">gcst_ecoli</a> | <a href="#">pflb_ecoli</a> | gcvT | pflB |
| P76108 | <a href="#">gcst_ecoli</a> | <a href="#">ydcS_ecoli</a> | gcvT | ydcS |
| P0A6F5 | <a href="#">glf_ecoli</a>  | <a href="#">ch60_ecoli</a> | glf  | groL |
| P18843 | <a href="#">glf_ecoli</a>  | <a href="#">nade_ecoli</a> | glf  | nadE |
| P16690 | <a href="#">glf_ecoli</a>  | <a href="#">phnn_ecoli</a> | glf  | phnN |
| P18843 | <a href="#">glk_ecoli</a>  | <a href="#">nade_ecoli</a> | glk  | nadE |
| P0A8I3 | <a href="#">glk_ecoli</a>  | <a href="#">yaaa_ecoli</a> | glk  | yaaA |
| P77721 | <a href="#">glk_ecoli</a>  | <a href="#">ydjf_ecoli</a> | glk  | ydjF |
| P08622 | <a href="#">glms_ecoli</a> | <a href="#">dnaj_ecoli</a> | glmS | dnaj |
| P76552 | <a href="#">glms_ecoli</a> | <a href="#">euth_ecoli</a> | glmS | eutH |
| P61175 | <a href="#">glms_ecoli</a> | <a href="#">rl22_ecoli</a> | glmS | rpIV |
| P00957 | <a href="#">glms_ecoli</a> | <a href="#">sya_ecoli</a>  | glmS | alaS |
| P0AFZ7 | <a href="#">glms_ecoli</a> | <a href="#">trkh_ecoli</a> | glmS | trkH |
| P76093 | <a href="#">glms_ecoli</a> | <a href="#">ynbd_ecoli</a> | glmS | ynbD |
| P33366 | <a href="#">glms_ecoli</a> | <a href="#">yohd_ecoli</a> | glmS | yohD |
| P0ADY7 | <a href="#">glna_ecoli</a> | <a href="#">rl16_ecoli</a> | glnA | rpIP |
| P0AG44 | <a href="#">glna_ecoli</a> | <a href="#">rl17_ecoli</a> | glnA | rpIQ |
| P60422 | <a href="#">glna_ecoli</a> | <a href="#">rl2_ecoli</a>  | glnA | rpIB |

|        |                             |                            |      |      |
|--------|-----------------------------|----------------------------|------|------|
| P0A7V3 | <a href="#">glna_ecoli</a>  | <a href="#">rs3_ecoli</a>  | glnA | rpsC |
| P75989 | <a href="#">glna_ecoli</a>  | <a href="#">ycge_ecoli</a> | glnA | ycgE |
| P0A6F5 | <a href="#">glnD_ecoli</a>  | <a href="#">ch60_ecoli</a> | glnD | groL |
| P0AC55 | <a href="#">glnD_ecoli</a>  | <a href="#">glnk_ecoli</a> | glnD | glnK |
| P13035 | <a href="#">glnD_ecoli</a>  | <a href="#">glpd_ecoli</a> | glnD | glpD |
| P60785 | <a href="#">glnD_ecoli</a>  | <a href="#">lepa_ecoli</a> | glnD | lepA |
| P22523 | <a href="#">glnD_ecoli</a>  | <a href="#">mukb_ecoli</a> | glnD | mukB |
| P18843 | <a href="#">glnD_ecoli</a>  | <a href="#">nade_ecoli</a> | glnD | nadE |
| P0ABL5 | <a href="#">glnD_ecoli</a>  | <a href="#">napc_ecoli</a> | glnD | napC |
| P0A7H0 | <a href="#">glnD_ecoli</a>  | <a href="#">recf_ecoli</a> | glnD | recF |
| P00957 | <a href="#">glnD_ecoli</a>  | <a href="#">sya_ecoli</a>  | glnD | alaS |
| P06612 | <a href="#">glnD_ecoli</a>  | <a href="#">top1_ecoli</a> | glnD | topA |
| P39304 | <a href="#">glnD_ecoli</a>  | <a href="#">ulad_ecoli</a> | glnD | ulaD |
| P0ADE4 | <a href="#">glnD_ecoli</a>  | <a href="#">ytfm_ecoli</a> | glnD | ytfM |
| P76104 | <a href="#">glnh_ecoli</a>  | <a href="#">ydcP_ecoli</a> | glnH | ydcP |
| P0A6F5 | <a href="#">glpd_ecoli</a>  | <a href="#">ch60_ecoli</a> | glpD | groL |
| P08622 | <a href="#">glpd_ecoli</a>  | <a href="#">dnaj_ecoli</a> | glpD | dnaJ |
| P06974 | <a href="#">glpd_ecoli</a>  | <a href="#">fliM_ecoli</a> | glpD | fliM |
| P18843 | <a href="#">glpd_ecoli</a>  | <a href="#">nade_ecoli</a> | glpD | nadE |
| P0ACD4 | <a href="#">glpd_ecoli</a>  | <a href="#">nifu_ecoli</a> | glpD | nifU |
| P0A7J0 | <a href="#">glpd_ecoli</a>  | <a href="#">ribb_ecoli</a> | glpD | ribB |
| P60422 | <a href="#">glpd_ecoli</a>  | <a href="#">rl2_ecoli</a>  | glpD | rplB |
| P0A7V8 | <a href="#">glpd_ecoli</a>  | <a href="#">rs4_ecoli</a>  | glpD | rpsD |
| P0A7W1 | <a href="#">glpd_ecoli</a>  | <a href="#">rs5_ecoli</a>  | glpD | rpsE |
| P0A9K9 | <a href="#">glpd_ecoli</a>  | <a href="#">slyD_ecoli</a> | glpD | slyD |
| P39334 | <a href="#">glpd_ecoli</a>  | <a href="#">yjjj_ecoli</a> | glpD | yjjJ |
| P0ABE2 | <a href="#">glrx4_ecoli</a> | <a href="#">bola_ecoli</a> | grxD | bolA |
| P69913 | <a href="#">glrx4_ecoli</a> | <a href="#">csra_ecoli</a> | grxD | csrA |
| P22255 | <a href="#">glrx4_ecoli</a> | <a href="#">cysq_ecoli</a> | grxD | cysQ |
| P0A9A9 | <a href="#">glrx4_ecoli</a> | <a href="#">fur_ecoli</a>  | grxD | fur  |
| P0A9X4 | <a href="#">glrx4_ecoli</a> | <a href="#">mreb_ecoli</a> | grxD | mreB |
| P18843 | <a href="#">glrx4_ecoli</a> | <a href="#">nade_ecoli</a> | grxD | nadE |
| P0ABL5 | <a href="#">glrx4_ecoli</a> | <a href="#">napc_ecoli</a> | grxD | napC |

|        |             |            |       |      |
|--------|-------------|------------|-------|------|
| POA772 | glrx4_ecoli | nrDI_ecoli | grxD  | nrDI |
| POAFD1 | glrx4_ecoli | nuoe_ecoli | grxD  | nuoE |
| P16456 | glrx4_ecoli | seld_ecoli | grxD  | seld |
| POA9K9 | glrx4_ecoli | slyD_ecoli | grxD  | slyD |
| P64521 | glrx4_ecoli | yeet_ecoli | grxD  | yeet |
| POAAI9 | glsa1_ecoli | fabD_ecoli | glsA1 | fabD |
| POA8Y5 | glsa1_ecoli | yida_ecoli | glsA1 | yidA |
| P09831 | gltD_ecoli  | gltB_ecoli | gltD  | gltB |
| P09831 | gltD_ecoli  | gltB_ecoli | gltD  | gltB |
| P75970 | glyA_ecoli  | vxis_ecoli | glyA  | xisE |
| POACJ5 | glyA_ecoli  | ybaO_ecoli | glyA  | ybaO |
| P64574 | glyA_ecoli  | yghW_ecoli | glyA  | yghW |
| P75977 | glyA_ecoli  | ymfM_ecoli | glyA  | ymfM |
| POABY2 | gmhb_ecoli  | flit_ecoli | gmhB  | fliT |
| P60422 | gmhb_ecoli  | rl2_ecoli  | gmhB  | rplB |
| POADZ4 | gmhb_ecoli  | rs15_ecoli | gmhB  | rpsO |
| P02358 | gmhb_ecoli  | rs6_ecoli  | gmhB  | rpsF |
| P32685 | gmhb_ecoli  | yjbd_ecoli | gmhB  | yjbd |
| P00722 | gnsA_ecoli  | bgaI_ecoli | gnsA  | lacZ |
| POA6B7 | gnsA_ecoli  | iscS_ecoli | gnsA  | iscS |
| POAEU7 | gnsA_ecoli  | skp_ecoli  | gnsA  | skp  |
| POA890 | gnsA_ecoli  | tusA_ecoli | gnsA  | tusA |
| POA8B5 | gnsA_ecoli  | ybaB_ecoli | gnsA  | ybaB |
| POAE08 | gpda_ecoli  | ahpC_ecoli | gpsA  | ahpC |
| POA951 | gpda_ecoli  | atda_ecoli | gpsA  | speG |
| POA9H3 | gpda_ecoli  | ldci_ecoli | gpsA  | cadA |
| P18843 | gpda_ecoli  | nade_ecoli | gpsA  | nadE |
| POAG30 | gpda_ecoli  | rho_ecoli  | gpsA  | rho  |



|        |            |             |      |      |
|--------|------------|-------------|------|------|
| P0AB71 | gpma_ecoli | alf_ecoli   | gpma | fbaA |
| P0AB91 | gpma_ecoli | arog_ecoli  | gpma | aroG |
| P25549 | gpma_ecoli | asla_ecoli  | gpma | asIA |
| P37689 | gpma_ecoli | gpmi_ecoli  | gpma | gpml |
| P04816 | gpma_ecoli | livk_ecoli  | gpma | livK |
| P50456 | gpma_ecoli | mlc_ecoli   | gpma | mlc  |
| P18843 | gpma_ecoli | nade_ecoli  | gpma | nadE |
| P15288 | gpma_ecoli | pepd_ecoli  | gpma | pepD |
| P0A7D7 | gpma_ecoli | pur7_ecoli  | gpma | purC |
| P0A7M2 | gpma_ecoli | rl28_ecoli  | gpma | rpmB |
| P0A8M3 | gpma_ecoli | syt_ecoli   | gpma | thrS |
| P0AG71 | gpmb_ecoli | rmuc_ecoli  | gpmb | rmuC |
| P0A9H3 | gpmi_ecoli | ldci_ecoli  | gpml | cadA |
| P18843 | gpmi_ecoli | nade_ecoli  | gpml | nadE |
| P77188 | grca_ecoli | matc_ecoli  | grcA | matC |
| P20083 | grca_ecoli | pare_ecoli  | grcA | parE |
| P09373 | grca_ecoli | pflb_ecoli  | grcA | pflB |
| P09373 | grca_ecoli | pflb_ecoli  | grcA | pflB |
| P09373 | grca_ecoli | pflb_ecoli  | grcA | pflB |
| P60723 | grca_ecoli | rl4_ecoli   | grcA | rpID |
| P0A7U7 | grca_ecoli | rs20_ecoli  | grcA | rpsT |
| P0A8N5 | grca_ecoli | syk2_ecoli  | grcA | lysU |
| P42632 | grca_ecoli | tdce_ecoli  | grcA | tdcE |
| P0A858 | grca_ecoli | tpis_ecoli  | grcA | tpiA |
| P77402 | grca_ecoli | ydiP_ecoli  | grcA | ydiP |
| P0A9Q7 | greA_ecoli | adhe_ecoli  | greA | adhE |
| P0ABB4 | greA_ecoli | atpb_ecoli  | greA | atpD |
| P00968 | greA_ecoli | carb_ecoli  | greA | carB |
| P0A6H1 | greA_ecoli | clpx_ecoli  | greA | clpX |
| P0A6Y8 | greA_ecoli | dnak_ecoli  | greA | dnaK |
| P0CE47 | greA_ecoli | eftu1_ecoli | greA | tufA |
| P0A9B2 | greA_ecoli | g3p1_ecoli  | greA | gapA |
| P0C8J8 | greA_ecoli | gatz_ecoli  | greA | gatZ |
| P0ADG7 | greA_ecoli | imdH_ecoli  | greA | guaB |
| P0A717 | greA_ecoli | kprs_ecoli  | greA | prs  |
| P25665 | greA_ecoli | mete_ecoli  | greA | metE |
| P18843 | greA_ecoli | nade_ecoli  | greA | nadE |
| P0AFG8 | greA_ecoli | odp1_ecoli  | greA | aceE |
| P08839 | greA_ecoli | pt1_ecoli   | greA | ptsl |
| P0AG30 | greA_ecoli | rho_ecoli   | greA | rho  |
| P0A7J3 | greA_ecoli | rl10_ecoli  | greA | rpIJ |

|        |                            |                            |      |      |
|--------|----------------------------|----------------------------|------|------|
| P0AA10 | <a href="#">grea_ecoli</a> | <a href="#">rl13_ecoli</a> | greA | rpIM |
| P60422 | <a href="#">grea_ecoli</a> | <a href="#">rl2_ecoli</a>  | greA | rpIB |
| P60723 | <a href="#">grea_ecoli</a> | <a href="#">rl4_ecoli</a>  | greA | rpID |
| P62399 | <a href="#">grea_ecoli</a> | <a href="#">rl5_ecoli</a>  | greA | rpIE |
| P0A7Z4 | <a href="#">grea_ecoli</a> | <a href="#">rpoa_ecoli</a> | greA | rpoA |
| P0A8V2 | <a href="#">grea_ecoli</a> | <a href="#">rpob_ecoli</a> | greA | rpoB |
| P0A8T7 | <a href="#">grea_ecoli</a> | <a href="#">rpoc_ecoli</a> | greA | rpoC |
| P0A7R5 | <a href="#">grea_ecoli</a> | <a href="#">rs10_ecoli</a> | greA | rpsJ |
| P0A7V0 | <a href="#">grea_ecoli</a> | <a href="#">rs2_ecoli</a>  | greA | rpsB |
| P0A7W1 | <a href="#">grea_ecoli</a> | <a href="#">rs5_ecoli</a>  | greA | rpsE |
| P02359 | <a href="#">grea_ecoli</a> | <a href="#">rs7_ecoli</a>  | greA | rpsG |
| P10408 | <a href="#">grea_ecoli</a> | <a href="#">seca_ecoli</a> | greA | secA |
| P0A8M3 | <a href="#">grea_ecoli</a> | <a href="#">syt_ecoli</a>  | greA | thrS |
| P30177 | <a href="#">grea_ecoli</a> | <a href="#">ybib_ecoli</a> | greA | ybiB |
| P0ACY3 | <a href="#">grea_ecoli</a> | <a href="#">yeag_ecoli</a> | greA | yeaG |
| P0AGJ5 | <a href="#">grea_ecoli</a> | <a href="#">yfif_ecoli</a> | greA | yfiF |

|        |                            |                             |      |      |
|--------|----------------------------|-----------------------------|------|------|
| P0ABL8 | <a href="#">grpe_ecoli</a> | <a href="#">ccmb_ecoli</a>  | grpE | ccmB |
| P63284 | <a href="#">grpe_ecoli</a> | <a href="#">clpb_ecoli</a>  | grpE | clpB |
| P69908 | <a href="#">grpe_ecoli</a> | <a href="#">dcea_ecoli</a>  | grpE | gadA |
| P69910 | <a href="#">grpe_ecoli</a> | <a href="#">dceb_ecoli</a>  | grpE | gadB |
| P0A6Y8 | <a href="#">grpe_ecoli</a> | <a href="#">dnak_ecoli</a>  | grpE | dnaK |
| P0A6Y8 | <a href="#">grpe_ecoli</a> | <a href="#">dnak_ecoli</a>  | grpE | dnaK |
| P0A6Y8 | <a href="#">grpe_ecoli</a> | <a href="#">dnak_ecoli</a>  | grpE | dnaK |
| P08555 | <a href="#">grpe_ecoli</a> | <a href="#">dsdx_ecoli</a>  | grpE | dsdX |
| P0CE47 | <a href="#">grpe_ecoli</a> | <a href="#">eftu1_ecoli</a> | grpE | tufA |
| P52600 | <a href="#">grpe_ecoli</a> | <a href="#">emry_ecoli</a>  | grpE | emrY |
| P0ADI4 | <a href="#">grpe_ecoli</a> | <a href="#">entb_ecoli</a>  | grpE | entB |
| P0ACZ4 | <a href="#">grpe_ecoli</a> | <a href="#">evga_ecoli</a>  | grpE | evgA |
| P33235 | <a href="#">grpe_ecoli</a> | <a href="#">flgk_ecoli</a>  | grpE | flgK |
| P0A9A9 | <a href="#">grpe_ecoli</a> | <a href="#">fur_ecoli</a>   | grpE | fur  |
| P0A6W5 | <a href="#">grpe_ecoli</a> | <a href="#">grea_ecoli</a>  | grpE | greA |
| P0A9M0 | <a href="#">grpe_ecoli</a> | <a href="#">lon_ecoli</a>   | grpE | lon  |
| P77188 | <a href="#">grpe_ecoli</a> | <a href="#">matc_ecoli</a>  | grpE | matC |
| P0A817 | <a href="#">grpe_ecoli</a> | <a href="#">metk_ecoli</a>  | grpE | metK |
| P0A769 | <a href="#">grpe_ecoli</a> | <a href="#">mntH_ecoli</a>  | grpE | mntH |
| P18843 | <a href="#">grpe_ecoli</a> | <a href="#">nade_ecoli</a>  | grpE | nadE |
| P0AFG0 | <a href="#">grpe_ecoli</a> | <a href="#">nusg_ecoli</a>  | grpE | nusG |
| P76078 | <a href="#">grpe_ecoli</a> | <a href="#">paab_ecoli</a>  | grpE | paaB |
| P15288 | <a href="#">grpe_ecoli</a> | <a href="#">pepd_ecoli</a>  | grpE | pepD |
| P16690 | <a href="#">grpe_ecoli</a> | <a href="#">phnN_ecoli</a>  | grpE | phnN |
| P0AG30 | <a href="#">grpe_ecoli</a> | <a href="#">rho_ecoli</a>   | grpE | rho  |
| P0A7J3 | <a href="#">grpe_ecoli</a> | <a href="#">rl10_ecoli</a>  | grpE | rpIJ |
| P0ADY3 | <a href="#">grpe_ecoli</a> | <a href="#">rl14_ecoli</a>  | grpE | rpIN |
| P02413 | <a href="#">grpe_ecoli</a> | <a href="#">rl15_ecoli</a>  | grpE | rpIO |

|        |            |            |      |      |
|--------|------------|------------|------|------|
| P0AG44 | grpe_ecoli | rl17_ecoli | grpE | rplQ |
| P0A7K6 | grpe_ecoli | rl19_ecoli | grpE | rplS |
| P0A7K6 | grpe_ecoli | rl19_ecoli | grpE | rplS |
| P0A7N9 | grpe_ecoli | rl33_ecoli | grpE | rpmG |
| P60723 | grpe_ecoli | rl4_ecoli  | grpE | rplD |
| P0A7K2 | grpe_ecoli | rl7_ecoli  | grpE | rplL |
| P0A7V0 | grpe_ecoli | rs2_ecoli  | grpE | rpsB |
| P0A7W1 | grpe_ecoli | rs5_ecoli  | grpE | rpsE |
| P02359 | grpe_ecoli | rs7_ecoli  | grpE | rpsG |
| P0A7X3 | grpe_ecoli | rs9_ecoli  | grpE | rpsI |
| P68191 | grpe_ecoli | sra_ecoli  | grpE | sra  |
| Q47538 | grpe_ecoli | taub_ecoli | grpE | tauB |
| P30139 | grpe_ecoli | thig_ecoli | grpE | thiG |
| P46923 | grpe_ecoli | torz_ecoli | grpE | torZ |
| P0AG03 | grpe_ecoli | ubix_ecoli | grpE | ubiX |
| P77536 | grpe_ecoli | ykgf_ecoli | grpE | ykgF |
| P0ACS5 | grpe_ecoli | zntr_ecoli | grpE | zntR |

|        |            |            |      |      |
|--------|------------|------------|------|------|
| P40120 | gsh1_ecoli | opgd_ecoli | gshA | mdoD |
| P76104 | gsh1_ecoli | ydcP_ecoli | gshA | ydcP |
| P18843 | gshr_ecoli | nade_ecoli | gor  | nadE |
| P60422 | gspe_ecoli | rl2_ecoli  | gspE | rplB |

|        |            |            |      |      |
|--------|------------|------------|------|------|
| P18843 | guaa_ecoli | nade_ecoli | guaA | nadE |
| P16690 | guaa_ecoli | phnn_ecoli | guaA | phnN |

|        |            |             |      |      |
|--------|------------|-------------|------|------|
| P00509 | gyra_ecoli | aat_ecoli   | gyrA | aspC |
| P22333 | gyra_ecoli | add_ecoli   | gyrA | add  |
| P0AE67 | gyra_ecoli | chey_ecoli  | gyrA | cheY |
| P0ABH9 | gyra_ecoli | clpa_ecoli  | gyrA | clpA |
| P0A9P0 | gyra_ecoli | dldh_ecoli  | gyrA | lpdA |
| P08622 | gyra_ecoli | dnaj_ecoli  | gyrA | dnaJ |
| P0A6Y8 | gyra_ecoli | dnak_ecoli  | gyrA | dnaK |
| P0CE47 | gyra_ecoli | eftu1_ecoli | gyrA | tufA |
| P0CE47 | gyra_ecoli | eftu1_ecoli | gyrA | tufA |
| P0AEM4 | gyra_ecoli | flgm_ecoli  | gyrA | flgM |
| P0ABZ1 | gyra_ecoli | flig_ecoli  | gyrA | fliG |
| P0A9A6 | gyra_ecoli | ftsZ_ecoli  | gyrA | ftsZ |
| P0AES4 | gyra_ecoli | gyra_ecoli  | gyrA | gyrA |

|        |                            |                              |      |       |
|--------|----------------------------|------------------------------|------|-------|
| POAES6 | <a href="#">gyra_ecoli</a> | <a href="#">gyrb_ecoli</a>   | gyrA | gyrB  |
| POAES6 | <a href="#">gyra_ecoli</a> | <a href="#">gyrb_ecoli</a>   | gyrA | gyrB  |
| POA9P9 | <a href="#">gyra_ecoli</a> | <a href="#">idno_ecoli</a>   | gyrA | idnO  |
| P68187 | <a href="#">gyra_ecoli</a> | <a href="#">malk_ecoli</a>   | gyrA | malkK |
| POA817 | <a href="#">gyra_ecoli</a> | <a href="#">metk_ecoli</a>   | gyrA | metK  |
| POA9X4 | <a href="#">gyra_ecoli</a> | <a href="#">mreb_ecoli</a>   | gyrA | mreB  |
| POA772 | <a href="#">gyra_ecoli</a> | <a href="#">nrDI_ecoli</a>   | gyrA | nrDI  |
| P06959 | <a href="#">gyra_ecoli</a> | <a href="#">odp2_ecoli</a>   | gyrA | aceF  |
| POAAH0 | <a href="#">gyra_ecoli</a> | <a href="#">pstb_ecoli</a>   | gyrA | pstB  |
| Q9F557 | <a href="#">gyra_ecoli</a> | <a href="#">q9f557_ecolx</a> | gyrA | ycgC  |
| POA7G6 | <a href="#">gyra_ecoli</a> | <a href="#">reca_ecoli</a>   | gyrA | recA  |
| POAG30 | <a href="#">gyra_ecoli</a> | <a href="#">rho_ecoli</a>    | gyrA | rho   |
| POA7L8 | <a href="#">gyra_ecoli</a> | <a href="#">rl27_ecoli</a>   | gyrA | rpmA  |
| POA7U3 | <a href="#">gyra_ecoli</a> | <a href="#">rs19_ecoli</a>   | gyrA | rpsS  |
| POA7V0 | <a href="#">gyra_ecoli</a> | <a href="#">rs2_ecoli</a>    | gyrA | rpsB  |
| POA7V0 | <a href="#">gyra_ecoli</a> | <a href="#">rs2_ecoli</a>    | gyrA | rpsB  |
| POA6U5 | <a href="#">gyra_ecoli</a> | <a href="#">rsmg_ecoli</a>   | gyrA | rsmG  |
| P46850 | <a href="#">gyra_ecoli</a> | <a href="#">rtcb_ecoli</a>   | gyrA | rtcB  |
| POAGD7 | <a href="#">gyra_ecoli</a> | <a href="#">srp54_ecoli</a>  | gyrA | ffh   |
| P00961 | <a href="#">gyra_ecoli</a> | <a href="#">sygb_ecoli</a>   | gyrA | glyS  |
| P11875 | <a href="#">gyra_ecoli</a> | <a href="#">syr_ecoli</a>    | gyrA | argS  |
| P76464 | <a href="#">gyra_ecoli</a> | <a href="#">yfas_ecoli</a>   | gyrA | yfaS  |
| P39308 | <a href="#">gyra_ecoli</a> | <a href="#">yjfz_ecoli</a>   | gyrA | yjfZ  |
| P14377 | <a href="#">gyra_ecoli</a> | <a href="#">zras_ecoli</a>   | gyrA | zraS  |
|        |                            |                              |      |       |
| P39404 | <a href="#">gyrb_ecoli</a> | <a href="#">bgIJ_ecoli</a>   | gyrB | bgIJ  |
| POA9P6 | <a href="#">gyrb_ecoli</a> | <a href="#">dead_ecoli</a>   | gyrB | deaD  |
| POCE47 | <a href="#">gyrb_ecoli</a> | <a href="#">eftu1_ecoli</a>  | gyrB | tufA  |
| POCE47 | <a href="#">gyrb_ecoli</a> | <a href="#">eftu1_ecoli</a>  | gyrB | tufA  |
| POAES4 | <a href="#">gyrb_ecoli</a> | <a href="#">gyra_ecoli</a>   | gyrB | gyrA  |
| POAES4 | <a href="#">gyrb_ecoli</a> | <a href="#">gyra_ecoli</a>   | gyrB | gyrA  |
| POAES4 | <a href="#">gyrb_ecoli</a> | <a href="#">gyra_ecoli</a>   | gyrB | gyrA  |
| POA817 | <a href="#">gyrb_ecoli</a> | <a href="#">metk_ecoli</a>   | gyrB | metK  |
| P20083 | <a href="#">gyrb_ecoli</a> | <a href="#">pare_ecoli</a>   | gyrB | parE  |
| P42184 | <a href="#">gyrb_ecoli</a> | <a href="#">prsa_ecolx</a>   | gyrB | prsA  |
| POA7J3 | <a href="#">gyrb_ecoli</a> | <a href="#">rl10_ecoli</a>   | gyrB | rplJ  |
| POADZ0 | <a href="#">gyrb_ecoli</a> | <a href="#">rl23_ecoli</a>   | gyrB | rplW  |
| POA7V0 | <a href="#">gyrb_ecoli</a> | <a href="#">rs2_ecoli</a>    | gyrB | rpsB  |
| P00961 | <a href="#">gyrb_ecoli</a> | <a href="#">sygb_ecoli</a>   | gyrB | glyS  |
| POA8H8 | <a href="#">gyrb_ecoli</a> | <a href="#">yacg_ecoli</a>   | gyrB | yacG  |
| POA8H8 | <a href="#">gyrb_ecoli</a> | <a href="#">yacg_ecoli</a>   | gyrB | yacG  |
|        |                            |                              |      |       |
| P31680 | <a href="#">hcha_ecoli</a> | <a href="#">djIA_ecoli</a>   | hchA | djIA  |

|        |                            |                            |      |      |
|--------|----------------------------|----------------------------|------|------|
| P18843 | <a href="#">hcha_ecoli</a> | <a href="#">nade_ecoli</a> | hchA | nadE |
| POA853 | <a href="#">hcha_ecoli</a> | <a href="#">tnaa_ecoli</a> | hchA | tnaA |

|        |                            |                            |      |      |
|--------|----------------------------|----------------------------|------|------|
| POA6F5 | <a href="#">hdha_ecoli</a> | <a href="#">ch60_ecoli</a> | hdhA | groL |
| POADZ4 | <a href="#">hdha_ecoli</a> | <a href="#">rs15_ecoli</a> | hdhA | rpsO |
| P39177 | <a href="#">hdha_ecoli</a> | <a href="#">uspg_ecoli</a> | hdhA | uspG |

|        |                            |                             |      |      |
|--------|----------------------------|-----------------------------|------|------|
| POABB4 | <a href="#">held_ecoli</a> | <a href="#">atpb_ecoli</a>  | held | atpD |
| POABD8 | <a href="#">held_ecoli</a> | <a href="#">bccp_ecoli</a>  | held | accB |
| POA6F5 | <a href="#">held_ecoli</a> | <a href="#">ch60_ecoli</a>  | held | groL |
| POA6F5 | <a href="#">held_ecoli</a> | <a href="#">ch60_ecoli</a>  | held | groL |
| P69913 | <a href="#">held_ecoli</a> | <a href="#">csra_ecoli</a>  | held | csrA |
| P69910 | <a href="#">held_ecoli</a> | <a href="#">dceb_ecoli</a>  | held | gadB |
| POA6Y8 | <a href="#">held_ecoli</a> | <a href="#">dnak_ecoli</a>  | held | dnaK |
| POA6Y8 | <a href="#">held_ecoli</a> | <a href="#">dnak_ecoli</a>  | held | dnaK |
| POCE47 | <a href="#">held_ecoli</a> | <a href="#">eftu1_ecoli</a> | held | tufA |
| POCE47 | <a href="#">held_ecoli</a> | <a href="#">eftu1_ecoli</a> | held | tufA |
| POA9B2 | <a href="#">held_ecoli</a> | <a href="#">g3p1_ecoli</a>  | held | gapA |
| P33195 | <a href="#">held_ecoli</a> | <a href="#">gcsp_ecoli</a>  | held | gcvP |
| POA705 | <a href="#">held_ecoli</a> | <a href="#">if2_ecoli</a>   | held | infB |
| P60716 | <a href="#">held_ecoli</a> | <a href="#">lipa_ecoli</a>  | held | lipA |
| P09373 | <a href="#">held_ecoli</a> | <a href="#">pflb_ecoli</a>  | held | pflB |
| POA799 | <a href="#">held_ecoli</a> | <a href="#">pgk_ecoli</a>   | held | pgk  |
| P08839 | <a href="#">held_ecoli</a> | <a href="#">pt1_ecoli</a>   | held | ptsI |
| POAG48 | <a href="#">held_ecoli</a> | <a href="#">rl21_ecoli</a>  | held | rplU |
| P60438 | <a href="#">held_ecoli</a> | <a href="#">rl3_ecoli</a>   | held | rplC |
| P60723 | <a href="#">held_ecoli</a> | <a href="#">rl4_ecoli</a>   | held | rplD |
| POA7K2 | <a href="#">held_ecoli</a> | <a href="#">rl7_ecoli</a>   | held | rplL |
| POAG67 | <a href="#">held_ecoli</a> | <a href="#">rs1_ecoli</a>   | held | rpsA |
| P02359 | <a href="#">held_ecoli</a> | <a href="#">rs7_ecoli</a>   | held | rpsG |
| POA858 | <a href="#">held_ecoli</a> | <a href="#">tpis_ecoli</a>  | held | tpiA |

|        |                            |                            |      |      |
|--------|----------------------------|----------------------------|------|------|
| P42593 | <a href="#">hem2_ecoli</a> | <a href="#">fadh_ecoli</a> | hemB | fadH |
| POAEU0 | <a href="#">hem2_ecoli</a> | <a href="#">hisj_ecoli</a> | hemB | hisJ |
| POAFY2 | <a href="#">hem2_ecoli</a> | <a href="#">sana_ecoli</a> | hemB | sanA |

|        |                            |                            |      |      |
|--------|----------------------------|----------------------------|------|------|
| POACE0 | <a href="#">hflc_ecoli</a> | <a href="#">mbhm_ecoli</a> | hflC | hybC |
|--------|----------------------------|----------------------------|------|------|

|        |            |            |      |      |
|--------|------------|------------|------|------|
| P60422 | hflc_ecoli | rl2_ecoli  | hflC | rpIB |
| P27836 | hflc_ecoli | wecg_ecoli | hflC | wecG |
| P77774 | hflc_ecoli | yfgl_ecoli | hflC | yfgL |

|        |           |             |     |      |
|--------|-----------|-------------|-----|------|
| P33224 | hfq_ecoli | aidb_ecoli  | hfq | aidB |
| P0A9Y6 | hfq_ecoli | cspc_ecoli  | hfq | cspC |
| P69913 | hfq_ecoli | csra_ecoli  | hfq | csrA |
| P0ACF0 | hfq_ecoli | dbha_ecoli  | hfq | hupA |
| P0ACF0 | hfq_ecoli | dbha_ecoli  | hfq | hupA |
| P0ACF4 | hfq_ecoli | dbhb_ecoli  | hfq | hupB |
| P0A9P6 | hfq_ecoli | dead_ecoli  | hfq | deaD |
| P08622 | hfq_ecoli | dnaj_ecoli  | hfq | dnaJ |
| P0A6Y8 | hfq_ecoli | dnak_ecoli  | hfq | dnaK |
| P0CE47 | hfq_ecoli | eftu1_ecoli | hfq | tufA |
| P0A6P9 | hfq_ecoli | eno_ecoli   | hfq | eno  |
| P43329 | hfq_ecoli | hrpa_ecoli  | hfq | hrpA |
| P0A9M0 | hfq_ecoli | lon_ecoli   | hfq | lon  |
| P21645 | hfq_ecoli | lpxd_ecoli  | hfq | lpxD |
| P68739 | hfq_ecoli | nfi_ecoli   | hfq | nfi  |
| P05055 | hfq_ecoli | pnp_ecoli   | hfq | pnp  |
| P0AG30 | hfq_ecoli | rho_ecoli   | hfq | rho  |
| P0AG30 | hfq_ecoli | rho_ecoli   | hfq | rho  |
| P0A7L0 | hfq_ecoli | rl1_ecoli   | hfq | rpIA |
| P0AA10 | hfq_ecoli | rl13_ecoli  | hfq | rpIM |
| P0ADY3 | hfq_ecoli | rl14_ecoli  | hfq | rpIN |
| P02413 | hfq_ecoli | rl15_ecoli  | hfq | rpIO |
| P0A7K6 | hfq_ecoli | rl19_ecoli  | hfq | rpIS |
| P60422 | hfq_ecoli | rl2_ecoli   | hfq | rpIB |
| P60422 | hfq_ecoli | rl2_ecoli   | hfq | rpIB |
| P0A7L3 | hfq_ecoli | rl20_ecoli  | hfq | rpIT |
| P0AG48 | hfq_ecoli | rl21_ecoli  | hfq | rpIU |
| P61175 | hfq_ecoli | rl22_ecoli  | hfq | rpIV |
| P60624 | hfq_ecoli | rl24_ecoli  | hfq | rpIX |
| P0A7M2 | hfq_ecoli | rl28_ecoli  | hfq | rpmB |
| P60438 | hfq_ecoli | rl3_ecoli   | hfq | rpIC |
| P60438 | hfq_ecoli | rl3_ecoli   | hfq | rpIC |
| P60723 | hfq_ecoli | rl4_ecoli   | hfq | rpID |
| P60723 | hfq_ecoli | rl4_ecoli   | hfq | rpID |
| P0A7K2 | hfq_ecoli | rl7_ecoli   | hfq | rpIL |
| P0A7R1 | hfq_ecoli | rl9_ecoli   | hfq | rpII |
| P75864 | hfq_ecoli | rlmI_ecoli  | hfq | rlmL |

|        |           |            |     |      |
|--------|-----------|------------|-----|------|
| P37765 | hfq_ecoli | rlub_ecoli | hfq | rluB |
| P21513 | hfq_ecoli | rne_ecoli  | hfq | rne  |
| P0A9J0 | hfq_ecoli | rng_ecoli  | hfq | rng  |
| P21499 | hfq_ecoli | rnrr_ecoli | hfq | rnrr |
| P21499 | hfq_ecoli | rnrr_ecoli | hfq | rnrr |
| P0ACI0 | hfq_ecoli | rob_ecoli  | hfq | rob  |
| P0A7Z4 | hfq_ecoli | rpoa_ecoli | hfq | rpoA |
| P0A8V2 | hfq_ecoli | rpob_ecoli | hfq | rpob |
| P0A8T7 | hfq_ecoli | rpoc_ecoli | hfq | rpoc |
| P0AG67 | hfq_ecoli | rs1_ecoli  | hfq | rpsA |
| P0AG67 | hfq_ecoli | rs1_ecoli  | hfq | rpsA |
| P0A7S9 | hfq_ecoli | rs13_ecoli | hfq | rpsM |
| P0A7S9 | hfq_ecoli | rs13_ecoli | hfq | rpsM |
| P0A7T3 | hfq_ecoli | rs16_ecoli | hfq | rpsP |
| P0A7T7 | hfq_ecoli | rs18_ecoli | hfq | rpsR |
| P0A7V0 | hfq_ecoli | rs2_ecoli  | hfq | rpsB |
| P0A7V0 | hfq_ecoli | rs2_ecoli  | hfq | rpsB |
| P0A7V3 | hfq_ecoli | rs3_ecoli  | hfq | rpsC |
| P0A7V8 | hfq_ecoli | rs4_ecoli  | hfq | rpsD |
| P0A7V8 | hfq_ecoli | rs4_ecoli  | hfq | rpsD |
| P0A7W1 | hfq_ecoli | rs5_ecoli  | hfq | rpsE |
| P02358 | hfq_ecoli | rs6_ecoli  | hfq | rpsF |
| P02359 | hfq_ecoli | rs7_ecoli  | hfq | rpsG |
| P10408 | hfq_ecoli | seca_ecoli | hfq | secA |
| P14081 | hfq_ecoli | selb_ecoli | hfq | selB |
| P0AEU7 | hfq_ecoli | skp_ecoli  | hfq | skp  |
| P0AEU7 | hfq_ecoli | skp_ecoli  | hfq | skp  |
| P0AG24 | hfq_ecoli | spot_ecoli | hfq | spoT |
| P0A847 | hfq_ecoli | tgt_ecoli  | hfq | tgt  |
| P0A850 | hfq_ecoli | tig_ecoli  | hfq | tig  |
| P39177 | hfq_ecoli | uspg_ecoli | hfq | uspG |
| P08245 | hfq_ecoli | ycih_ecoli | hfq | yciH |
| P0AGJ5 | hfq_ecoli | yfif_ecoli | hfq | yfiF |
| P25728 | hfq_ecoli | ygba_ecoli | hfq | ygbA |
| P30871 | hfq_ecoli | ygif_ecoli | hfq | ygiF |

|        |            |             |      |      |
|--------|------------|-------------|------|------|
| P0ABD5 | hint_ecoli | acca_ecoli  | hinT | accA |
| P0ABA6 | hint_ecoli | atpg_ecoli  | hinT | atpG |
| P0A6Y8 | hint_ecoli | dnak_ecoli  | hinT | dnaK |
| P0A988 | hint_ecoli | dpo3b_ecoli | hinT | dnaN |
| P0CE47 | hint_ecoli | eftu1_ecoli | hinT | tufA |
| P0AEZ7 | hint_ecoli | mltd_ecoli  | hinT | mltD |
| P22523 | hint_ecoli | mukb_ecoli  | hinT | mukB |
| P18843 | hint_ecoli | nade_ecoli  | hinT | nadE |
| P0AFD6 | hint_ecoli | nuoi_ecoli  | hinT | nuol |

|        |                            |                            |      |      |
|--------|----------------------------|----------------------------|------|------|
| P0A862 | <a href="#">hint_ecoli</a> | <a href="#">tpx_ecoli</a>  | hinT | tpx  |
| P77561 | <a href="#">hint_ecoli</a> | <a href="#">ydep_ecoli</a> | hinT | ydeP |
| P0A894 | <a href="#">hint_ecoli</a> | <a href="#">yhbj_ecoli</a> | hinT | yhbJ |
| P39359 | <a href="#">hint_ecoli</a> | <a href="#">yjhh_ecoli</a> | hinT | yjhH |
|        |                            |                            |      |      |
| P0A6Y8 | <a href="#">his4_ecoli</a> | <a href="#">dnak_ecoli</a> | hisA | dnak |
| POC077 | <a href="#">his4_ecoli</a> | <a href="#">rele_ecoli</a> | hisA | reLE |
|        |                            |                            |      |      |
| P09831 | <a href="#">his7_ecoli</a> | <a href="#">gltb_ecoli</a> | hisB | gltB |
| P15038 | <a href="#">his7_ecoli</a> | <a href="#">held_ecoli</a> | hisB | helD |
|        |                            |                            |      |      |
| P23874 | <a href="#">his8_ecoli</a> | <a href="#">hipa_ecoli</a> | hisC | hipA |
| P06988 | <a href="#">his8_ecoli</a> | <a href="#">hisx_ecoli</a> | hisC | hisD |
| P0A9J8 | <a href="#">his8_ecoli</a> | <a href="#">phea_ecoli</a> | hisC | pheA |
|        |                            |                            |      |      |
| P0A6F5 | <a href="#">hldd_ecoli</a> | <a href="#">ch60_ecoli</a> | hldD | groL |
| P16703 | <a href="#">hldd_ecoli</a> | <a href="#">cysm_ecoli</a> | hldD | cysM |
| P77268 | <a href="#">hldd_ecoli</a> | <a href="#">ddpd_ecoli</a> | hldD | ddpD |
| P0A6Y8 | <a href="#">hldd_ecoli</a> | <a href="#">dnak_ecoli</a> | hldD | dnak |
| P11454 | <a href="#">hldd_ecoli</a> | <a href="#">entf_ecoli</a> | hldD | entF |
| P02413 | <a href="#">hldd_ecoli</a> | <a href="#">rl15_ecoli</a> | hldD | rplO |
| P0A7K6 | <a href="#">hldd_ecoli</a> | <a href="#">rl19_ecoli</a> | hldD | rplS |
| P60438 | <a href="#">hldd_ecoli</a> | <a href="#">rl3_ecoli</a>  | hldD | rplC |
| P02359 | <a href="#">hldd_ecoli</a> | <a href="#">rs7_ecoli</a>  | hldD | rpsG |
| P02359 | <a href="#">hldd_ecoli</a> | <a href="#">rs7_ecoli</a>  | hldD | rpsG |
| P10408 | <a href="#">hldd_ecoli</a> | <a href="#">seca_ecoli</a> | hldD | secA |
| P33225 | <a href="#">hldd_ecoli</a> | <a href="#">tora_ecoli</a> | hldD | torA |
| P75829 | <a href="#">hldd_ecoli</a> | <a href="#">ybjx_ecoli</a> | hldD | ybjX |
| P76069 | <a href="#">hldd_ecoli</a> | <a href="#">yday_ecoli</a> | hldD | ydaY |
| P0ADI9 | <a href="#">hldd_ecoli</a> | <a href="#">yhhn_ecoli</a> | hldD | yhhN |
| P37657 | <a href="#">hldd_ecoli</a> | <a href="#">yhjs_ecoli</a> | hldD | yhJS |
|        |                            |                            |      |      |
| P64467 | <a href="#">hns_ecoli</a>  | <a href="#">cnu_ecoli</a>  | hns  | cnu  |
| P0ACF0 | <a href="#">hns_ecoli</a>  | <a href="#">dbha_ecoli</a> | hns  | hupA |
| P0A717 | <a href="#">hns_ecoli</a>  | <a href="#">kprs_ecoli</a> | hns  | prs  |
| P15977 | <a href="#">hns_ecoli</a>  | <a href="#">malq_ecoli</a> | hns  | malQ |
| P0AFG8 | <a href="#">hns_ecoli</a>  | <a href="#">odp1_ecoli</a> | hns  | aceE |
| P00490 | <a href="#">hns_ecoli</a>  | <a href="#">phsm_ecoli</a> | hns  | malP |
| P0ADY3 | <a href="#">hns_ecoli</a>  | <a href="#">rl14_ecoli</a> | hns  | rplN |



|        |                           |                            |     |      |
|--------|---------------------------|----------------------------|-----|------|
| P61175 | <a href="#">hns_ecoli</a> | <a href="#">rl22_ecoli</a> | hns | rpIV |
| P60624 | <a href="#">hns_ecoli</a> | <a href="#">rl24_ecoli</a> | hns | rpIX |
| P0A8V2 | <a href="#">hns_ecoli</a> | <a href="#">rpob_ecoli</a> | hns | rpoB |
| P0A8T7 | <a href="#">hns_ecoli</a> | <a href="#">rpoc_ecoli</a> | hns | rpoC |
| P0A7V0 | <a href="#">hns_ecoli</a> | <a href="#">rs2_ecoli</a>  | hns | rpsB |
| P0A7V0 | <a href="#">hns_ecoli</a> | <a href="#">rs2_ecoli</a>  | hns | rpsB |
| P0A814 | <a href="#">hns_ecoli</a> | <a href="#">ruvc_ecoli</a> | hns | ruvC |
| P10408 | <a href="#">hns_ecoli</a> | <a href="#">seca_ecoli</a> | hns | secA |
| P28043 | <a href="#">hns_ecoli</a> | <a href="#">ssb2_ecolx</a> | hns | ssb  |
| P0ACG1 | <a href="#">hns_ecoli</a> | <a href="#">stpa_ecoli</a> | hns | stpA |
| P0ACG1 | <a href="#">hns_ecoli</a> | <a href="#">stpa_ecoli</a> | hns | stpA |
| P75869 | <a href="#">hns_ecoli</a> | <a href="#">sxy_ecoli</a>  | hns | sxy  |
| P0A850 | <a href="#">hns_ecoli</a> | <a href="#">tig_ecoli</a>  | hns | tig  |
| P75970 | <a href="#">hns_ecoli</a> | <a href="#">vxis_ecoli</a> | hns | xisE |
| P76092 | <a href="#">hns_ecoli</a> | <a href="#">ynbc_ecoli</a> | hns | ynbC |

|        |                            |                             |      |      |
|--------|----------------------------|-----------------------------|------|------|
| P0A9P0 | <a href="#">hrpa_ecoli</a> | <a href="#">dldh_ecoli</a>  | hrpA | lpdA |
| P0CE47 | <a href="#">hrpa_ecoli</a> | <a href="#">eftu1_ecoli</a> | hrpA | tufA |
| P0AFG8 | <a href="#">hrpa_ecoli</a> | <a href="#">odp1_ecoli</a>  | hrpA | aceE |
| P06959 | <a href="#">hrpa_ecoli</a> | <a href="#">odp2_ecoli</a>  | hrpA | aceF |
| P0A7R1 | <a href="#">hrpa_ecoli</a> | <a href="#">rl9_ecoli</a>   | hrpA | rpII |
| P0AG67 | <a href="#">hrpa_ecoli</a> | <a href="#">rs1_ecoli</a>   | hrpA | rpsA |
| P0A7S9 | <a href="#">hrpa_ecoli</a> | <a href="#">rs13_ecoli</a>  | hrpA | rpsM |
| P0A7U3 | <a href="#">hrpa_ecoli</a> | <a href="#">rs19_ecoli</a>  | hrpA | rpsS |
| P0A7V0 | <a href="#">hrpa_ecoli</a> | <a href="#">rs2_ecoli</a>   | hrpA | rpsB |
| P0A7V3 | <a href="#">hrpa_ecoli</a> | <a href="#">rs3_ecoli</a>   | hrpA | rpsC |
| P0A7W1 | <a href="#">hrpa_ecoli</a> | <a href="#">rs5_ecoli</a>   | hrpA | rpsE |
| P02359 | <a href="#">hrpa_ecoli</a> | <a href="#">rs7_ecoli</a>   | hrpA | rpsG |
| P0AGJ5 | <a href="#">hrpa_ecoli</a> | <a href="#">yfif_ecoli</a>  | hrpA | yfiF |

|        |                            |                            |      |      |
|--------|----------------------------|----------------------------|------|------|
| P0AE08 | <a href="#">hsca_ecoli</a> | <a href="#">ahpc_ecoli</a> | hscA | ahpC |
| P0ABE7 | <a href="#">hsca_ecoli</a> | <a href="#">c562_ecolx</a> | hscA | cybC |
| P0AE60 | <a href="#">hsca_ecoli</a> | <a href="#">ceda_ecoli</a> | hscA | cedA |
| P0A9H9 | <a href="#">hsca_ecoli</a> | <a href="#">chez_ecoli</a> | hscA | cheZ |
| P0ABY2 | <a href="#">hsca_ecoli</a> | <a href="#">flit_ecoli</a> | hscA | fliT |

|        |            |            |      |      |
|--------|------------|------------|------|------|
| P0AC92 | hsca_ecoli | gnsa_ecoli | hscA | gnsA |
| P0ACD4 | hsca_ecoli | nifu_ecoli | hscA | nifU |
| P37095 | hsca_ecoli | pepb_ecoli | hscA | pepB |
| P69791 | hsca_ecoli | ptqa_ecoli | hscA | chbA |
| P0A7J3 | hsca_ecoli | rl10_ecoli | hscA | rplJ |
| P0A7J3 | hsca_ecoli | rl10_ecoli | hscA | rplJ |
| P0ADY3 | hsca_ecoli | rl14_ecoli | hscA | rplN |
| P0AG44 | hsca_ecoli | rl17_ecoli | hscA | rplQ |
| P60422 | hsca_ecoli | rl2_ecoli  | hscA | rplB |
| P0A7L3 | hsca_ecoli | rl20_ecoli | hscA | rplT |
| P62399 | hsca_ecoli | rl5_ecoli  | hscA | rplE |
| P0AG55 | hsca_ecoli | rl6_ecoli  | hscA | rplF |
| P0A7K2 | hsca_ecoli | rl7_ecoli  | hscA | rplL |
| P0A7V3 | hsca_ecoli | rs3_ecoli  | hscA | rpsC |
| P0A7V8 | hsca_ecoli | rs4_ecoli  | hscA | rpsD |
| P0A7W1 | hsca_ecoli | rs5_ecoli  | hscA | rpsE |
| P0A7X3 | hsca_ecoli | rs9_ecoli  | hscA | rpsI |
| P10408 | hsca_ecoli | seca_ecoli | hscA | secA |
| P0AG80 | hsca_ecoli | ugpb_ecoli | hscA | ugpB |
| Q46797 | hsca_ecoli | ygeq_ecoli | hscA | ygeQ |
| P42598 | hsca_ecoli | ygjq_ecoli | hscA | ygjQ |

|        |            |             |      |      |
|--------|------------|-------------|------|------|
| P0AEC3 | hslo_ecoli | arcb_ecoli  | hsLO | arcB |
| P0CE47 | hslo_ecoli | eftu1_ecoli | hsLO | tufA |
| P0CE47 | hslo_ecoli | eftu1_ecoli | hsLO | tufA |
| P33593 | hslo_ecoli | nikd_ecoli  | hsLO | nikD |
| P60438 | hslo_ecoli | rl3_ecoli   | hsLO | rplC |
| P0A7R5 | hslo_ecoli | rs10_ecoli  | hsLO | rpsJ |
| P0A7S3 | hslo_ecoli | rs12_ecoli  | hsLO | rpsL |
| P0A7V0 | hslo_ecoli | rs2_ecoli   | hsLO | rpsB |
| P0A7V3 | hslo_ecoli | rs3_ecoli   | hsLO | rpsC |
| P0A7W1 | hslo_ecoli | rs5_ecoli   | hsLO | rpsE |
| P02359 | hslo_ecoli | rs7_ecoli   | hsLO | rpsG |

|        |            |            |      |      |
|--------|------------|------------|------|------|
| P0A6Y8 | hslr_ecoli | dnak_ecoli | hslR | dnaK |
| P28224 | hslr_ecoli | mlic_ecoli | hslR | mliC |
| P0AFJ5 | hslr_ecoli | phob_ecoli | hslR | phoB |
| P0AG30 | hslr_ecoli | rho_ecoli  | hslR | rho  |
| P0A7L0 | hslr_ecoli | rl1_ecoli  | hslR | rplA |
| P0AA10 | hslr_ecoli | rl13_ecoli | hslR | rplM |
| P0ADY3 | hslr_ecoli | rl14_ecoli | hslR | rplN |
| P0A7K6 | hslr_ecoli | rl19_ecoli | hslR | rplS |
| P60422 | hslr_ecoli | rl2_ecoli  | hslR | rplB |
| P61175 | hslr_ecoli | rl22_ecoli | hslR | rplV |
| P0A7M2 | hslr_ecoli | rl28_ecoli | hslR | rpmB |

|        |            |            |      |      |
|--------|------------|------------|------|------|
| P60723 | hslr_ecoli | rl4_ecoli  | hslR | rplD |
| P0A7R1 | hslr_ecoli | rl9_ecoli  | hslR | rplI |
| P0A7R5 | hslr_ecoli | rs10_ecoli | hslR | rpsJ |
| P0A7V0 | hslr_ecoli | rs2_ecoli  | hslR | rpsB |
| P0A7V0 | hslr_ecoli | rs2_ecoli  | hslR | rpsB |
| P0A7V3 | hslr_ecoli | rs3_ecoli  | hslR | rpsC |
| P0A7V8 | hslr_ecoli | rs4_ecoli  | hslR | rpsD |
| P0A7W1 | hslr_ecoli | rs5_ecoli  | hslR | rpsE |
| P02359 | hslr_ecoli | rs7_ecoli  | hslR | rpsG |
| P46850 | hslr_ecoli | rtcb_ecoli | hslR | rtcB |
| P13458 | hslr_ecoli | sbcc_ecoli | hslR | sbcC |
| P75683 | hslr_ecoli | yagg_ecoli | hslR | yagG |
| P75954 | hslr_ecoli | ycfs_ecoli | hslR | ycfS |

|        |            |             |      |      |
|--------|------------|-------------|------|------|
| P24182 | hslu_ecoli | accC_ecoli  | hslU | accC |
| P0A9Q5 | hslu_ecoli | accD_ecoli  | hslU | accD |
| P00561 | hslu_ecoli | ak1h_ecoli  | hslU | thrA |
| P0ABD8 | hslu_ecoli | bccp_ecoli  | hslU | accB |
| P06961 | hslu_ecoli | cca_ecoli   | hslU | cca  |
| P0ABL8 | hslu_ecoli | ccmb_ecoli  | hslU | ccmB |
| P0AEB0 | hslu_ecoli | cysw_ecoli  | hslU | cysW |
| P0AEE5 | hslu_ecoli | dgal_ecoli  | hslU | mgIB |
| P08622 | hslu_ecoli | dnaj_ecoli  | hslU | dnaJ |
| P08622 | hslu_ecoli | dnaj_ecoli  | hslU | dnaJ |
| P0A6Y8 | hslu_ecoli | dnak_ecoli  | hslU | dnaK |
| P0A6Y8 | hslu_ecoli | dnak_ecoli  | hslU | dnaK |
| P0A6M8 | hslu_ecoli | efg_ecoli   | hslU | fusA |
| P0CE47 | hslu_ecoli | eftu1_ecoli | hslU | tufA |
| P0CE47 | hslu_ecoli | eftu1_ecoli | hslU | tufA |
| P0A9A6 | hslu_ecoli | ftsZ_ecoli  | hslU | ftsZ |
| P0C8J8 | hslu_ecoli | gatz_ecoli  | hslU | gatZ |
| P0A7A2 | hslu_ecoli | gpmb_ecoli  | hslU | gpmB |
| P0A6H5 | hslu_ecoli | hslu_ecoli  | hslU | hslU |
| P0A7B8 | hslu_ecoli | hslv_ecoli  | hslU | hslV |
| P0A7B8 | hslu_ecoli | hslv_ecoli  | hslU | hslV |
| P0A7B8 | hslu_ecoli | hslv_ecoli  | hslU | hslV |
| P0A7B8 | hslu_ecoli | hslv_ecoli  | hslU | hslV |
| P0A7B8 | hslu_ecoli | hslv_ecoli  | hslU | hslV |
| P0A7B8 | hslu_ecoli | hslv_ecoli  | hslU | hslV |
| P0A8S1 | hslu_ecoli | icia_ecoli  | hslU | iciA |
| P0A9M0 | hslu_ecoli | lon_ecoli   | hslU | lon  |
| P25665 | hslu_ecoli | mete_ecoli  | hslU | metE |
| P0A817 | hslu_ecoli | metk_ecoli  | hslU | metK |
| P0A9X4 | hslu_ecoli | mreb_ecoli  | hslU | mreB |
| P09152 | hslu_ecoli | narg_ecoli  | hslU | narG |

|        |            |             |      |      |
|--------|------------|-------------|------|------|
| P33599 | hslu_ecoli | nuocd_ecoli | hslU | nuoC |
| P0A917 | hslu_ecoli | ompx_ecoli  | hslU | ompx |
| P0AAH0 | hslu_ecoli | pstb_ecoli  | hslU | pstB |
| P0A7G6 | hslu_ecoli | reca_ecoli  | hslU | recA |
| P25539 | hslu_ecoli | ribd_ecoli  | hslU | ribD |
| P0A7J3 | hslu_ecoli | rl10_ecoli  | hslU | rplJ |
| P0AA10 | hslu_ecoli | rl13_ecoli  | hslU | rplM |
| P0ADY7 | hslu_ecoli | rl16_ecoli  | hslU | rplP |
| P60438 | hslu_ecoli | rl3_ecoli   | hslU | rplC |
| P60723 | hslu_ecoli | rl4_ecoli   | hslU | rplD |
| P0A7K2 | hslu_ecoli | rl7_ecoli   | hslU | rplL |
| P0A7R5 | hslu_ecoli | rs10_ecoli  | hslU | rpsJ |
| P0A7V0 | hslu_ecoli | rs2_ecoli   | hslU | rpsB |
| P0A7W1 | hslu_ecoli | rs5_ecoli   | hslU | rpsE |
| P02359 | hslu_ecoli | rs7_ecoli   | hslU | rpsG |
| P10408 | hslu_ecoli | seca_ecoli  | hslU | secA |
| P0AFZ5 | hslu_ecoli | sula_ecoli  | hslU | sulA |
| P77318 | hslu_ecoli | yden_ecoli  | hslU | ydeN |
| P77804 | hslu_ecoli | ydga_ecoli  | hslU | ydgA |
| Q46787 | hslu_ecoli | ygeg_ecoli  | hslU | ygeG |

|        |            |             |      |      |
|--------|------------|-------------|------|------|
| P0ABD5 | hslv_ecoli | acca_ecoli  | hslV | accA |
| P24182 | hslv_ecoli | accC_ecoli  | hslV | accC |
| P0A9Q5 | hslv_ecoli | accD_ecoli  | hslV | accD |
| P0ABD8 | hslv_ecoli | bccp_ecoli  | hslV | accB |
| P0ABL8 | hslv_ecoli | ccmb_ecoli  | hslV | ccmB |
| P0A9P6 | hslv_ecoli | dead_ecoli  | hslV | deaD |
| P0CE47 | hslv_ecoli | eftu1_ecoli | hslV | tufA |
| P25527 | hslv_ecoli | gabp_ecoli  | hslV | gabP |
| P0A6H5 | hslv_ecoli | hslu_ecoli  | hslV | hslU |
| P0A7B8 | hslv_ecoli | hslv_ecoli  | hslV | hslV |
| P0A717 | hslv_ecoli | kprs_ecoli  | hslV | prs  |
| P0A7J3 | hslv_ecoli | rl10_ecoli  | hslV | rplJ |
| P0AG44 | hslv_ecoli | rl17_ecoli  | hslV | rplQ |
| P0A7K6 | hslv_ecoli | rl19_ecoli  | hslV | rplS |
| P60422 | hslv_ecoli | rl2_ecoli   | hslV | rplB |
| P0AG48 | hslv_ecoli | rl21_ecoli  | hslV | rplU |
| P61175 | hslv_ecoli | rl22_ecoli  | hslV | rplV |
| P61175 | hslv_ecoli | rl22_ecoli  | hslV | rplV |
| P60624 | hslv_ecoli | rl24_ecoli  | hslV | rplX |
| P0A7M6 | hslv_ecoli | rl29_ecoli  | hslV | rpmC |
| P60438 | hslv_ecoli | rl3_ecoli   | hslV | rplC |
| P60438 | hslv_ecoli | rl3_ecoli   | hslV | rplC |
| P0A7N9 | hslv_ecoli | rl33_ecoli  | hslV | rpmG |
| P60723 | hslv_ecoli | rl4_ecoli   | hslV | rplD |

|        |                            |                            |      |      |
|--------|----------------------------|----------------------------|------|------|
| P60723 | <a href="#">hslv_ecoli</a> | <a href="#">rl4_ecoli</a>  | hslV | rpID |
| P0A7K2 | <a href="#">hslv_ecoli</a> | <a href="#">rl7_ecoli</a>  | hslV | rpIL |
| P0A7R1 | <a href="#">hslv_ecoli</a> | <a href="#">rl9_ecoli</a>  | hslV | rpII |
| P37765 | <a href="#">hslv_ecoli</a> | <a href="#">rlub_ecoli</a> | hslV | rluB |
| P0A7S9 | <a href="#">hslv_ecoli</a> | <a href="#">rs13_ecoli</a> | hslV | rpsM |
| P0A7T3 | <a href="#">hslv_ecoli</a> | <a href="#">rs16_ecoli</a> | hslV | rpsP |
| P02359 | <a href="#">hslv_ecoli</a> | <a href="#">rs7_ecoli</a>  | hslV | rpsG |
| P0A858 | <a href="#">hslv_ecoli</a> | <a href="#">tpis_ecoli</a> | hslV | tpiA |
| P0ADS9 | <a href="#">hslv_ecoli</a> | <a href="#">yggN_ecoli</a> | hslV | yggN |
| Q46844 | <a href="#">hslv_ecoli</a> | <a href="#">yght_ecoli</a> | hslV | yghT |
| P37642 | <a href="#">hslv_ecoli</a> | <a href="#">yhjd_ecoli</a> | hslV | yhjD |
| P0A8H6 | <a href="#">hslv_ecoli</a> | <a href="#">yihl_ecoli</a> | hslV | yihI |

|        |                            |                            |      |      |
|--------|----------------------------|----------------------------|------|------|
| P36553 | <a href="#">htpg_ecoli</a> | <a href="#">hem6_ecoli</a> | htpG | hemF |
| P77329 | <a href="#">htpg_ecoli</a> | <a href="#">hyfg_ecoli</a> | htpG | hyfG |
| P15005 | <a href="#">htpg_ecoli</a> | <a href="#">mcrb_ecoli</a> | htpG | mcrB |
| P37095 | <a href="#">htpg_ecoli</a> | <a href="#">pepb_ecoli</a> | htpG | pepB |
| P60422 | <a href="#">htpg_ecoli</a> | <a href="#">rl2_ecoli</a>  | htpG | rpIB |
| P0A7M6 | <a href="#">htpg_ecoli</a> | <a href="#">rl29_ecoli</a> | htpG | rpmC |
| P0A7N9 | <a href="#">htpg_ecoli</a> | <a href="#">rl33_ecoli</a> | htpG | rpmG |
| P0A8T7 | <a href="#">htpg_ecoli</a> | <a href="#">rpoc_ecoli</a> | htpG | rpoC |
| P02358 | <a href="#">htpg_ecoli</a> | <a href="#">rs6_ecoli</a>  | htpG | rpsF |
| P02359 | <a href="#">htpg_ecoli</a> | <a href="#">rs7_ecoli</a>  | htpG | rpsG |
| P0AG80 | <a href="#">htpg_ecoli</a> | <a href="#">ugpb_ecoli</a> | htpG | ugpB |
| P75862 | <a href="#">htpg_ecoli</a> | <a href="#">ycbw_ecoli</a> | htpG | ycbW |
| P76236 | <a href="#">htpg_ecoli</a> | <a href="#">yeai_ecoli</a> | htpG | yeal |
| P52052 | <a href="#">htpg_ecoli</a> | <a href="#">yggr_ecoli</a> | htpG | yggR |

|        |                            |                            |      |      |
|--------|----------------------------|----------------------------|------|------|
| P30128 | <a href="#">hybd_ecoli</a> | <a href="#">greb_ecoli</a> | hybD | greB |
| P60422 | <a href="#">hybd_ecoli</a> | <a href="#">rl2_ecoli</a>  | hybD | rpIB |
| P76121 | <a href="#">hybd_ecoli</a> | <a href="#">yddh_ecoli</a> | hybD | yddH |
| P0ADK8 | <a href="#">hybd_ecoli</a> | <a href="#">yibl_ecoli</a> | hybD | yibL |

|        |                            |                             |      |      |
|--------|----------------------------|-----------------------------|------|------|
| P10443 | <a href="#">iada_ecoli</a> | <a href="#">dpo3a_ecoli</a> | iadA | dnaE |
| P16919 | <a href="#">iada_ecoli</a> | <a href="#">rhsd_ecoli</a>  | iadA | rhsD |

|        |                            |                            |      |      |
|--------|----------------------------|----------------------------|------|------|
| P06612 | <a href="#">iada_ecoli</a> | <a href="#">top1_ecoli</a> | iadA | topA |
| P37338 | <a href="#">iada_ecoli</a> | <a href="#">ygae_ecoli</a> | iadA | ygaE |
| P67910 | <a href="#">iclr_ecoli</a> | <a href="#">hldd_ecoli</a> | icLR | hldD |
| P06959 | <a href="#">iclr_ecoli</a> | <a href="#">odp2_ecoli</a> | icLR | aceF |
| P0A7L0 | <a href="#">iclr_ecoli</a> | <a href="#">rl1_ecoli</a>  | icLR | rplA |
| P0AA10 | <a href="#">iclr_ecoli</a> | <a href="#">rl13_ecoli</a> | icLR | rplM |
| P0A7L3 | <a href="#">iclr_ecoli</a> | <a href="#">rl20_ecoli</a> | icLR | rplT |
| P0AG48 | <a href="#">iclr_ecoli</a> | <a href="#">rl21_ecoli</a> | icLR | rplU |
| P61175 | <a href="#">iclr_ecoli</a> | <a href="#">rl22_ecoli</a> | icLR | rplV |
| P60624 | <a href="#">iclr_ecoli</a> | <a href="#">rl24_ecoli</a> | icLR | rplX |
| P60723 | <a href="#">iclr_ecoli</a> | <a href="#">rl4_ecoli</a>  | icLR | rplD |
| P0A7S9 | <a href="#">iclr_ecoli</a> | <a href="#">rs13_ecoli</a> | icLR | rpsM |
| P0AG59 | <a href="#">iclr_ecoli</a> | <a href="#">rs14_ecoli</a> | icLR | rpsN |
| P0A7V0 | <a href="#">iclr_ecoli</a> | <a href="#">rs2_ecoli</a>  | icLR | rpsB |
| P0A7V3 | <a href="#">iclr_ecoli</a> | <a href="#">rs3_ecoli</a>  | icLR | rpsC |
| P0A7W1 | <a href="#">iclr_ecoli</a> | <a href="#">rs5_ecoli</a>  | icLR | rpsE |
| P02358 | <a href="#">iclr_ecoli</a> | <a href="#">rs6_ecoli</a>  | icLR | rpsF |
| P02359 | <a href="#">iclr_ecoli</a> | <a href="#">rs7_ecoli</a>  | icLR | rpsG |
| P0A7W7 | <a href="#">iclr_ecoli</a> | <a href="#">rs8_ecoli</a>  | icLR | rpsH |
| P18843 | <a href="#">idh_ecoli</a>  | <a href="#">nade_ecoli</a> | icd  | nadE |
| P76515 | <a href="#">idh_ecoli</a>  | <a href="#">yfds_ecoli</a> | icd  | yfdS |
| P0ADK8 | <a href="#">idh_ecoli</a>  | <a href="#">yibl_ecoli</a> | icd  | yibL |
| P76148 | <a href="#">idh_ecoli</a>  | <a href="#">yneg_ecoli</a> | icd  | yneG |
| P31224 | <a href="#">if1_ecoli</a>  | <a href="#">acrb_ecoli</a> | infA | acrB |
| P00722 | <a href="#">if1_ecoli</a>  | <a href="#">bgal_ecoli</a> | infA | lacZ |
| P18843 | <a href="#">if1_ecoli</a>  | <a href="#">nade_ecoli</a> | infA | nadE |
| P39451 | <a href="#">if2_ecoli</a>  | <a href="#">adhp_ecoli</a> | infB | adhP |
| P23325 | <a href="#">if2_ecoli</a>  | <a href="#">arpa_ecoli</a> | infB | arpA |
| P0AE30 | <a href="#">if2_ecoli</a>  | <a href="#">artm_ecoli</a> | infB | artM |
| P0A6Y8 | <a href="#">if2_ecoli</a>  | <a href="#">dnak_ecoli</a> | infB | dnaK |
| P0AC73 | <a href="#">if2_ecoli</a>  | <a href="#">ebgc_ecoli</a> | infB | ebgC |
| P52613 | <a href="#">if2_ecoli</a>  | <a href="#">flij_ecoli</a> | infB | fliJ |
| P0A6W5 | <a href="#">if2_ecoli</a>  | <a href="#">grea_ecoli</a> | infB | greA |
| P09372 | <a href="#">if2_ecoli</a>  | <a href="#">grpe_ecoli</a> | infB | grpE |
| P30750 | <a href="#">if2_ecoli</a>  | <a href="#">metn_ecoli</a> | infB | metN |
| P77569 | <a href="#">if2_ecoli</a>  | <a href="#">mhpr_ecoli</a> | infB | mhpR |
| P00634 | <a href="#">if2_ecoli</a>  | <a href="#">ppb_ecoli</a>  | infB | phoA |
| P00634 | <a href="#">if2_ecoli</a>  | <a href="#">ppb_ecoli</a>  | infB | phoA |
| P25888 | <a href="#">if2_ecoli</a>  | <a href="#">rhle_ecoli</a> | infB | rhIE |
| P25539 | <a href="#">if2_ecoli</a>  | <a href="#">ribd_ecoli</a> | infB | ribD |
| P43672 | <a href="#">if2_ecoli</a>  | <a href="#">uup_ecoli</a>  | infB | uup  |

|        |            |            |      |      |
|--------|------------|------------|------|------|
| P30177 | if2_ecoli  | ybib_ecoli | infB | ybiB |
| P46144 | if2_ecoli  | yedj_ecoli | infB | yedJ |
| P0ADE8 | if2_ecoli  | ygfz_ecoli | infB | ygfZ |
| P0ABL8 | if3_ecoli  | ccmb_ecoli | infC | ccmB |
| P0AEB2 | if3_ecoli  | daca_ecoli | infC | dacA |
| P0ACF4 | if3_ecoli  | dbhb_ecoli | infC | hupB |
| P0A9J0 | if3_ecoli  | rng_ecoli  | infC | rng  |
| P77499 | if3_ecoli  | sufc_ecoli | infC | sufC |
| P0AGJ5 | if3_ecoli  | yfif_ecoli | infC | yfiF |
| P0AGK4 | if3_ecoli  | yhby_ecoli | infC | yhby |
| P76092 | if3_ecoli  | ynbc_ecoli | infC | ynbC |
| P33997 | ihfa_ecoli | alpa_ecoli | ihfA | alpA |
| P0A6Y8 | ihfa_ecoli | dnak_ecoli | ihfA | dnaK |
| P0A6Y1 | ihfa_ecoli | ihfb_ecoli | ihfA | ihfB |
| P18843 | ihfa_ecoli | nade_ecoli | ihfA | nadE |
| P0A7L0 | ihfa_ecoli | rl1_ecoli  | ihfA | rplA |
| P0ADY3 | ihfa_ecoli | rl14_ecoli | ihfA | rplN |
| P60438 | ihfa_ecoli | rl3_ecoli  | ihfA | rplC |
| P62399 | ihfa_ecoli | rl5_ecoli  | ihfA | rplE |
| P0A7V0 | ihfa_ecoli | rs2_ecoli  | ihfA | rpsB |
| P0A7V8 | ihfa_ecoli | rs4_ecoli  | ihfA | rpsD |
| P0A7V8 | ihfa_ecoli | rs4_ecoli  | ihfA | rpsD |
| P33341 | ihfa_ecoli | yehb_ecoli | ihfA | yehB |
| P07639 | ihfb_ecoli | arob_ecoli | ihfB | aroB |
| P0ACF0 | ihfb_ecoli | dbha_ecoli | ihfB | hupA |
| P0ACF4 | ihfb_ecoli | dbhb_ecoli | ihfB | hupB |
| P0AER8 | ihfb_ecoli | gltS_ecoli | ihfB | gltS |
| P0A6X7 | ihfb_ecoli | ihfa_ecoli | ihfB | ihfA |
| P0AFF6 | ihfb_ecoli | nusa_ecoli | ihfB | nusA |
| P0A7L0 | ihfb_ecoli | rl1_ecoli  | ihfB | rplA |
| P0AA10 | ihfb_ecoli | rl13_ecoli | ihfB | rplM |
| P02413 | ihfb_ecoli | rl15_ecoli | ihfB | rplO |
| P0ADY7 | ihfb_ecoli | rl16_ecoli | ihfB | rplP |
| P0A7K6 | ihfb_ecoli | rl19_ecoli | ihfB | rplS |
| P60422 | ihfb_ecoli | rl2_ecoli  | ihfB | rplB |
| P0AG48 | ihfb_ecoli | rl21_ecoli | ihfB | rplU |
| P61175 | ihfb_ecoli | rl22_ecoli | ihfB | rplV |
| P0ADZ0 | ihfb_ecoli | rl23_ecoli | ihfB | rplW |
| P0A7M6 | ihfb_ecoli | rl29_ecoli | ihfB | rpmC |
| P60438 | ihfb_ecoli | rl3_ecoli  | ihfB | rplC |
| P0A7N9 | ihfb_ecoli | rl33_ecoli | ihfB | rpmG |
| P60723 | ihfb_ecoli | rl4_ecoli  | ihfB | rplD |

|        |            |            |      |      |
|--------|------------|------------|------|------|
| P62399 | ihfb_ecoli | rl5_ecoli  | ihfB | rpIE |
| P0A8T7 | ihfb_ecoli | rpoc_ecoli | ihfB | rpoC |
| P0A7S9 | ihfb_ecoli | rs13_ecoli | ihfB | rpsM |
| P0A7U3 | ihfb_ecoli | rs19_ecoli | ihfB | rpsS |
| P0A7V3 | ihfb_ecoli | rs3_ecoli  | ihfB | rpsC |
| P0A7V8 | ihfb_ecoli | rs4_ecoli  | ihfB | rpsD |
| P0A7W1 | ihfb_ecoli | rs5_ecoli  | ihfB | rpsE |
| P02358 | ihfb_ecoli | rs6_ecoli  | ihfB | rpsF |
| P02359 | ihfb_ecoli | rs7_ecoli  | ihfB | rpsG |
| P0A7W7 | ihfb_ecoli | rs8_ecoli  | ihfB | rpsH |
| P39160 | ihfb_ecoli | uxub_ecoli | ihfB | uxuB |
| P0AGK4 | ihfb_ecoli | yhby_ecoli | ihfB | yhbY |
| P0AF90 | ihfb_ecoli | yjgd_ecoli | ihfB | yjgD |

|        |            |            |     |     |
|--------|------------|------------|-----|-----|
| P17998 | immd_ecoli | cead_ecolx | cdi | cda |
| P17998 | immd_ecoli | cead_ecolx | cdi | cda |

|        |            |            |      |      |
|--------|------------|------------|------|------|
| P0A978 | ints_ecoli | cspg_ecoli | intS | cspG |
| P0A9P0 | ints_ecoli | dldh_ecoli | intS | lpdA |
| P06959 | ints_ecoli | odp2_ecoli | intS | aceF |
| P06959 | ints_ecoli | odp2_ecoli | intS | aceF |

|        |            |             |     |      |
|--------|------------|-------------|-----|------|
| P37623 | ipyr_ecoli | acpt_ecoli  | ppa | acpT |
| P32705 | ipyr_ecoli | actp_ecoli  | ppa | actP |
| P76458 | ipyr_ecoli | atod_ecoli  | ppa | atoD |
| P0A6F5 | ipyr_ecoli | ch60_ecoli  | ppa | groL |
| P0A6J5 | ipyr_ecoli | dada_ecoli  | ppa | dadA |
| P39099 | ipyr_ecoli | degq_ecoli  | ppa | degQ |
| P0A6Y8 | ipyr_ecoli | dnak_ecoli  | ppa | dnaK |
| P0A988 | ipyr_ecoli | dpo3b_ecoli | ppa | dnaN |
| P0CE47 | ipyr_ecoli | eftu1_ecoli | ppa | tufA |
| P0ACB4 | ipyr_ecoli | hemg_ecoli  | ppa | hemG |
| P67910 | ipyr_ecoli | hldd_ecoli  | ppa | hldD |
| P13029 | ipyr_ecoli | katg_ecoli  | ppa | katG |
| P0A744 | ipyr_ecoli | msra_ecoli  | ppa | msrA |
| P25888 | ipyr_ecoli | rhle_ecoli  | ppa | rhIE |
| P0A7J3 | ipyr_ecoli | rl10_ecoli  | ppa | rplJ |
| P0AA10 | ipyr_ecoli | rl13_ecoli  | ppa | rplM |
| P0ADY3 | ipyr_ecoli | rl14_ecoli  | ppa | rplN |



|        |                            |                            |     |      |
|--------|----------------------------|----------------------------|-----|------|
| P0A7K6 | <a href="#">ipyr_ecoli</a> | <a href="#">rl19_ecoli</a> | ppa | rplS |
| P61175 | <a href="#">ipyr_ecoli</a> | <a href="#">rl22_ecoli</a> | ppa | rplV |
| P0A7M2 | <a href="#">ipyr_ecoli</a> | <a href="#">rl28_ecoli</a> | ppa | rpmB |
| P60438 | <a href="#">ipyr_ecoli</a> | <a href="#">rl3_ecoli</a>  | ppa | rplC |
| P60723 | <a href="#">ipyr_ecoli</a> | <a href="#">rl4_ecoli</a>  | ppa | rplD |
| P60723 | <a href="#">ipyr_ecoli</a> | <a href="#">rl4_ecoli</a>  | ppa | rplD |
| P0A7R1 | <a href="#">ipyr_ecoli</a> | <a href="#">rl9_ecoli</a>  | ppa | rplI |
| P0A7R5 | <a href="#">ipyr_ecoli</a> | <a href="#">rs10_ecoli</a> | ppa | rpsJ |
| P0AG59 | <a href="#">ipyr_ecoli</a> | <a href="#">rs14_ecoli</a> | ppa | rpsN |
| P0A7V0 | <a href="#">ipyr_ecoli</a> | <a href="#">rs2_ecoli</a>  | ppa | rpsB |
| P0A7U7 | <a href="#">ipyr_ecoli</a> | <a href="#">rs20_ecoli</a> | ppa | rpsT |
| P0A7V3 | <a href="#">ipyr_ecoli</a> | <a href="#">rs3_ecoli</a>  | ppa | rpsC |
| P0A7W1 | <a href="#">ipyr_ecoli</a> | <a href="#">rs5_ecoli</a>  | ppa | rpsE |
| P02359 | <a href="#">ipyr_ecoli</a> | <a href="#">rs7_ecoli</a>  | ppa | rpsG |
| P0A7W7 | <a href="#">ipyr_ecoli</a> | <a href="#">rs8_ecoli</a>  | ppa | rpsH |
| P0AG86 | <a href="#">ipyr_ecoli</a> | <a href="#">secb_ecoli</a> | ppa | secB |
| P0A9K9 | <a href="#">ipyr_ecoli</a> | <a href="#">slyd_ecoli</a> | ppa | slyD |
| P0A850 | <a href="#">ipyr_ecoli</a> | <a href="#">tig_ecoli</a>  | ppa | tig  |
| P0A850 | <a href="#">ipyr_ecoli</a> | <a href="#">tig_ecoli</a>  | ppa | tig  |
| P75750 | <a href="#">ipyr_ecoli</a> | <a href="#">ybgq_ecoli</a> | ppa | ybgQ |
| P0AF90 | <a href="#">ipyr_ecoli</a> | <a href="#">yjgd_ecoli</a> | ppa | yjgD |

|        |                            |                            |      |      |
|--------|----------------------------|----------------------------|------|------|
| P0ABT2 | <a href="#">isca_ecoli</a> | <a href="#">dps_ecoli</a>  | iscA | dps  |
| P0A9R4 | <a href="#">isca_ecoli</a> | <a href="#">fer_ecoli</a>  | iscA | fdx  |
| P0A9R4 | <a href="#">isca_ecoli</a> | <a href="#">fer_ecoli</a>  | iscA | fdx  |
| P0A744 | <a href="#">isca_ecoli</a> | <a href="#">msra_ecoli</a> | iscA | msrA |
| P60422 | <a href="#">isca_ecoli</a> | <a href="#">rl2_ecoli</a>  | iscA | rplB |
| P00722 | <a href="#">iscs_ecoli</a> | <a href="#">bgal_ecoli</a> | iscS | lacZ |
| P12999 | <a href="#">iscs_ecoli</a> | <a href="#">bioc_ecoli</a> | iscS | bioC |
| P0A6Y8 | <a href="#">iscs_ecoli</a> | <a href="#">dnak_ecoli</a> | iscS | dnaK |
| P32177 | <a href="#">iscs_ecoli</a> | <a href="#">fdhd_ecoli</a> | iscS | fdhD |
| P0A6W5 | <a href="#">iscs_ecoli</a> | <a href="#">grea_ecoli</a> | iscS | greA |
| P10441 | <a href="#">iscs_ecoli</a> | <a href="#">lpxb_ecoli</a> | iscS | lpxB |
| P0AEZ7 | <a href="#">iscs_ecoli</a> | <a href="#">mltd_ecoli</a> | iscS | mltD |
| P18843 | <a href="#">iscs_ecoli</a> | <a href="#">nade_ecoli</a> | iscS | nadE |
| P0ABL5 | <a href="#">iscs_ecoli</a> | <a href="#">napc_ecoli</a> | iscS | napC |
| P0ACD4 | <a href="#">iscs_ecoli</a> | <a href="#">nifu_ecoli</a> | iscS | nifU |
| P0ACD4 | <a href="#">iscs_ecoli</a> | <a href="#">nifu_ecoli</a> | iscS | nifU |
| P0ACD4 | <a href="#">iscs_ecoli</a> | <a href="#">nifu_ecoli</a> | iscS | nifU |
| P75960 | <a href="#">iscs_ecoli</a> | <a href="#">npd_ecoli</a>  | iscS | npdA |
| P0A7X3 | <a href="#">iscs_ecoli</a> | <a href="#">rs9_ecoli</a>  | iscS | rpsI |
| P0A890 | <a href="#">iscs_ecoli</a> | <a href="#">tusa_ecoli</a> | iscS | tusA |
| P52645 | <a href="#">iscs_ecoli</a> | <a href="#">ydbh_ecoli</a> | iscS | ydbH |

|        |            |            |      |      |
|--------|------------|------------|------|------|
| P0AE58 | ispf_ecoli | caif_ecoli | ispF | caiF |
| P75936 | ispf_ecoli | flgd_ecoli | ispF | flgD |
| P17169 | ispe_ecoli | glms_ecoli | ispE | glmS |
| P67910 | ispf_ecoli | hldd_ecoli | ispF | hldD |
| P0A7R5 | ispf_ecoli | rs10_ecoli | ispF | rpsJ |
| P0A7V8 | ispf_ecoli | rs4_ecoli  | ispF | rpsD |
| P64570 | ispf_ecoli | yqgc_ecoli | ispF | yqgC |

|        |            |             |      |      |
|--------|------------|-------------|------|------|
| P69811 | k1pf_ecoli | ptfah_ecoli | fruK | fruB |
| P42598 | k1pf_ecoli | ygiq_ecoli  | fruK | ygiQ |

|        |             |            |      |      |
|--------|-------------|------------|------|------|
| P0A6E4 | k6pf1_ecoli | assy_ecoli | pfkA | argG |
| P28861 | k6pf1_ecoli | fenr_ecoli | pfkA | fpr  |
| P21889 | k6pf1_ecoli | syd_ecoli  | pfkA | aspS |
| P0A858 | k6pf1_ecoli | tpis_ecoli | pfkA | tpiA |

|        |           |            |     |      |
|--------|-----------|------------|-----|------|
| P03960 | kad_ecoli | atkb_ecoli | adk | kdpB |
| P25748 | kad_ecoli | gals_ecoli | adk | galS |
| P0A6Z3 | kad_ecoli | htpg_ecoli | adk | htpG |
| P0A8T7 | kad_ecoli | rpoc_ecoli | adk | rpoC |
| P77806 | kad_ecoli | ybdL_ecoli | adk | ybdL |

|        |            |            |      |      |
|--------|------------|------------|------|------|
| P26266 | katg_ecoli | fepe_ecoli | katG | fepE |
| P77569 | katg_ecoli | mhpr_ecoli | katG | mhpR |
| P18843 | katg_ecoli | nade_ecoli | katG | nadE |
| P0ACU0 | katg_ecoli | ybih_ecoli | katG | ybiH |

|        |           |            |     |      |
|--------|-----------|------------|-----|------|
| P0A6F5 | kbl_ecoli | ch60_ecoli | kbl | groL |
| P0A7A7 | kbl_ecoli | plsB_ecoli | kbl | plsB |
| P60723 | kbl_ecoli | rl4_ecoli  | kbl | rplD |
| P07913 | kbl_ecoli | tdh_ecoli  | kbl | tdh  |

|        |            |             |      |      |
|--------|------------|-------------|------|------|
| P0ACF4 | kdsb_ecoli | dbhb_ecoli  | kdsB | hupB |
| P0AD01 | kdsb_ecoli | dcur_ecoli  | kdsB | dcur |
| P0AC41 | kdsb_ecoli | dhsa_ecoli  | kdsB | sdhA |
| P08622 | kdsb_ecoli | dnaj_ecoli  | kdsB | dnaJ |
| P0A6Y8 | kdsb_ecoli | dnak_ecoli  | kdsB | dnaK |
| P0CE47 | kdsb_ecoli | eftu1_ecoli | kdsB | tufA |
| P18843 | kdsb_ecoli | nade_ecoli  | kdsB | nadE |
| P37095 | kdsb_ecoli | pepb_ecoli  | kdsB | pepB |

|        |                             |                            |      |       |
|--------|-----------------------------|----------------------------|------|-------|
| P0A7J7 | <a href="#">kdsb_ecoli</a>  | <a href="#">rl11_ecoli</a> | kdsB | rpIK  |
| P60723 | <a href="#">kdsb_ecoli</a>  | <a href="#">rl4_ecoli</a>  | kdsB | rpID  |
| P0A7K2 | <a href="#">kdsb_ecoli</a>  | <a href="#">rl7_ecoli</a>  | kdsB | rpIL  |
| P0AG67 | <a href="#">kdsb_ecoli</a>  | <a href="#">rs1_ecoli</a>  | kdsB | rpsA  |
| P0AFU2 | <a href="#">kdsb_ecoli</a>  | <a href="#">yfbS_ecoli</a> | kdsB | yfbS  |
| P32681 | <a href="#">kdsb_ecoli</a>  | <a href="#">yjah_ecoli</a> | kdsB | yjaH  |
| P0A7A7 | <a href="#">kdsc_ecoli</a>  | <a href="#">plsb_ecoli</a> | kdsC | plsB  |
| P0AAH8 | <a href="#">kdsc_ecoli</a>  | <a href="#">sapf_ecoli</a> | kdsC | sapF  |
| P05793 | <a href="#">kgua_ecoli</a>  | <a href="#">ilvc_ecoli</a> | gmk  | ilvC  |
| P0ADY7 | <a href="#">kgua_ecoli</a>  | <a href="#">rl16_ecoli</a> | gmk  | rpIP  |
| P0A7X3 | <a href="#">kgua_ecoli</a>  | <a href="#">rs9_ecoli</a>  | gmk  | rpsI  |
| P77698 | <a href="#">kgua_ecoli</a>  | <a href="#">ybck_ecoli</a> | gmk  | ybckK |
| P28916 | <a href="#">kgua_ecoli</a>  | <a href="#">ybfd_ecoli</a> | gmk  | ybfD  |
| P0A6F5 | <a href="#">khse_ecoli</a>  | <a href="#">ch60_ecoli</a> | thrB | groL  |
| P13035 | <a href="#">khse_ecoli</a>  | <a href="#">glpd_ecoli</a> | thrB | glpD  |
| P0A6F5 | <a href="#">kprs_ecoli</a>  | <a href="#">ch60_ecoli</a> | prs  | groL  |
| P0A9J6 | <a href="#">kprs_ecoli</a>  | <a href="#">rbsk_ecoli</a> | prs  | rbsK  |
| P00936 | <a href="#">kpyk1_ecoli</a> | <a href="#">cyaa_ecoli</a> | pykF | cyaA  |
| P0ABP8 | <a href="#">kpyk1_ecoli</a> | <a href="#">deod_ecoli</a> | pykF | deoD  |
| P0A6Y8 | <a href="#">kpyk1_ecoli</a> | <a href="#">dnak_ecoli</a> | pykF | dnaK  |
| P75882 | <a href="#">kpyk1_ecoli</a> | <a href="#">gfcD_ecoli</a> | pykF | gfcD  |
| P0A717 | <a href="#">kpyk1_ecoli</a> | <a href="#">kprs_ecoli</a> | pykF | prs   |
| P31554 | <a href="#">kpyk1_ecoli</a> | <a href="#">lptD_ecoli</a> | pykF | lptD  |
| P69741 | <a href="#">kpyk1_ecoli</a> | <a href="#">mbht_ecoli</a> | pykF | hybO  |
| P18843 | <a href="#">kpyk1_ecoli</a> | <a href="#">nade_ecoli</a> | pykF | nadE  |
| P09373 | <a href="#">kpyk1_ecoli</a> | <a href="#">pflb_ecoli</a> | pykF | pflB  |
| P0ACQ0 | <a href="#">kpyk1_ecoli</a> | <a href="#">rbsr_ecoli</a> | pykF | rbsR  |
| P75869 | <a href="#">kpyk1_ecoli</a> | <a href="#">sxy_ecoli</a>  | pykF | sxy   |
| P0AGJ9 | <a href="#">kpyk1_ecoli</a> | <a href="#">syy_ecoli</a>  | pykF | tyrS  |
| P63389 | <a href="#">kpyk1_ecoli</a> | <a href="#">yhes_ecoli</a> | pykF | yheS  |
| P32701 | <a href="#">kpyk1_ecoli</a> | <a href="#">yjcc_ecoli</a> | pykF | yjcC  |
| P42914 | <a href="#">kpyk1_ecoli</a> | <a href="#">yrai_ecoli</a> | pykF | yral  |
| P0A6Y8 | <a href="#">kpyk2_ecoli</a> | <a href="#">dnak_ecoli</a> | pykA | dnaK  |

|        |             |             |      |      |
|--------|-------------|-------------|------|------|
| P06971 | kpyk2_ecoli | fhua_ecoli  | pykA | fhua |
| P0ADH5 | kpyk2_ecoli | fimb_ecoli  | pykA | fimB |
| P23930 | kpyk2_ecoli | Int_ecoli   | pykA | Int  |
| P23909 | kpyk2_ecoli | mutS_ecoli  | pykA | mutS |
| P31678 | kpyk2_ecoli | otsb_ecoli  | pykA | otsB |
| P09373 | kpyk2_ecoli | pflb_ecoli  | pykA | pflB |
| P0A7B1 | kpyk2_ecoli | ppk_ecoli   | pykA | ppk  |
| P19642 | kpyk2_ecoli | ptocb_ecoli | pykA | malX |
| P0A8M3 | kpyk2_ecoli | syt_ecoli   | pykA | thrS |
| P0A850 | kpyk2_ecoli | tig_ecoli   | pykA | tig  |
| P0A850 | kpyk2_ecoli | tig_ecoli   | pykA | tig  |
| P52052 | kpyk2_ecoli | yggr_ecoli  | pykA | yggr |
|        |             |             |      |      |
| P18843 | ldhd_ecoli  | nade_ecoli  | ldhA | nadE |
| P0AED5 | ldhd_ecoli  | uvry_ecoli  | ldhA | uvrY |
| P52125 | ldhd_ecoli  | yfjj_ecoli  | ldhA | yfjJ |
|        |             |             |      |      |
| P00803 | lep_ecoli   | lep_ecoli   | lepB | lepB |
|        |             |             |      |      |
| P0A6C5 | lepa_ecoli  | arga_ecoli  | lepA | argA |
| P0AEW1 | lepa_ecoli  | hyfe_ecoli  | lepA | hyfE |
| P75830 | lepa_ecoli  | maca_ecoli  | lepA | macA |
| P33025 | lepa_ecoli  | psug_ecoli  | lepA | psuG |
| P76037 | lepa_ecoli  | puup_ecoli  | lepA | puuP |
| P15032 | lepa_ecoli  | rece_ecoli  | lepA | recE |
| P0AA10 | lepa_ecoli  | rl13_ecoli  | lepA | rpIM |
| P61175 | lepa_ecoli  | rl22_ecoli  | lepA | rpIV |
| P60624 | lepa_ecoli  | rl24_ecoli  | lepA | rpIX |
| P60723 | lepa_ecoli  | rl4_ecoli   | lepA | rpID |
| P0A7R1 | lepa_ecoli  | rl9_ecoli   | lepA | rpII |
| P0A7R5 | lepa_ecoli  | rs10_ecoli  | lepA | rpsJ |
| P0A7V0 | lepa_ecoli  | rs2_ecoli   | lepA | rpsB |
| P0A7W1 | lepa_ecoli  | rs5_ecoli   | lepA | rpsE |
| P02358 | lepa_ecoli  | rs6_ecoli   | lepA | rpsF |
| P02359 | lepa_ecoli  | rs7_ecoli   | lepA | rpsG |
| P0ADM6 | lepa_ecoli  | yidx_ecoli  | lepA | yidX |
| P64423 | lepa_ecoli  | zntb_ecoli  | lepA | zntB |
|        |             |             |      |      |
| P0A6F5 | lipa_ecoli  | ch60_ecoli  | lipA | groL |
| P0A6Y8 | lipa_ecoli  | dnak_ecoli  | lipA | dnaK |
| P22256 | lipa_ecoli  | gabt_ecoli  | lipA | gabT |
| P18843 | lipa_ecoli  | nade_ecoli  | lipA | nadE |
| P0A843 | lipa_ecoli  | tate_ecoli  | lipA | tatE |
| P0A9T6 | lipa_ecoli  | ybaq_ecoli  | lipA | ybaQ |
| P0ADK8 | lipa_ecoli  | yibl_ecoli  | lipA | yibL |

|        |            |             |      |       |
|--------|------------|-------------|------|-------|
| P0A6F5 | lidd_ecoli | ch60_ecoli  | lldD | groL  |
| P67910 | lidd_ecoli | hlidd_ecoli | lldD | hldD  |
| P03837 | lidd_ecoli | insh_ecoli  | lldD | insH1 |
| P03837 | lidd_ecoli | insh_ecoli  | lldD | insH1 |
| P0AFB8 | lidd_ecoli | ntrc_ecoli  | lldD | glnG  |
| P61175 | lidd_ecoli | rl22_ecoli  | lldD | rplV  |
| P0A7M2 | lidd_ecoli | rl28_ecoli  | lldD | rpmB  |
| P0A7V0 | lidd_ecoli | rs2_ecoli   | lldD | rpsB  |
| P0A7V8 | lidd_ecoli | rs4_ecoli   | lldD | rpsD  |
| P00960 | lidd_ecoli | syga_ecoli  | lldD | glyQ  |
| P25531 | lidd_ecoli | yicr_ecoli  | lldD | yicR  |

|        |           |             |     |      |
|--------|-----------|-------------|-----|------|
| P03004 | lon_ecoli | dnaa_ecoli  | lon | dnaA |
| P06710 | lon_ecoli | dpo3x_ecoli | lon | dnaX |
| P0CE47 | lon_ecoli | eftu1_ecoli | lon | tufA |
| P78055 | lon_ecoli | fsaa_ecoli  | lon | fsaA |
| P18843 | lon_ecoli | nade_ecoli  | lon | nadE |
| P0AA10 | lon_ecoli | rl13_ecoli  | lon | rplM |
| P0AA10 | lon_ecoli | rl13_ecoli  | lon | rplM |
| P0A7L3 | lon_ecoli | rl20_ecoli  | lon | rplT |
| P0AG48 | lon_ecoli | rl21_ecoli  | lon | rplU |
| P61175 | lon_ecoli | rl22_ecoli  | lon | rplV |
| P60438 | lon_ecoli | rl3_ecoli   | lon | rplC |
| P0A7R1 | lon_ecoli | rl9_ecoli   | lon | rplI |
| P0A7R1 | lon_ecoli | rl9_ecoli   | lon | rplI |
| P0A7V0 | lon_ecoli | rs2_ecoli   | lon | rpsB |
| P0A7V3 | lon_ecoli | rs3_ecoli   | lon | rpsC |
| P02359 | lon_ecoli | rs7_ecoli   | lon | rpsG |
| P0A7W7 | lon_ecoli | rs8_ecoli   | lon | rpsH |
| P0AAH8 | lon_ecoli | sapf_ecoli  | lon | sapF |
| P0AG86 | lon_ecoli | secb_ecoli  | lon | secB |
| P28043 | lon_ecoli | ssb2_ecolx  | lon | ssb  |
| P39336 | lon_ecoli | yjgl_ecoli  | lon | yjgL |

|        |           |            |     |      |
|--------|-----------|------------|-----|------|
| P61316 | lpp_ecoli | lola_ecoli | lpp | lola |
| P69776 | lpp_ecoli | lpp_ecoli  | lpp | lpp  |

|        |            |             |      |      |
|--------|------------|-------------|------|------|
| P25516 | lpxa_ecoli | acon1_ecoli | lpxA | acnA |
| P06972 | lpxa_ecoli | fhub_ecoli  | lpxA | fhuB |
| P0AAI3 | lpxa_ecoli | ftsh_ecoli  | lpxA | ftsH |
| P0A9A9 | lpxa_ecoli | fur_ecoli   | lpxA | fur  |
| P0CI31 | lpxa_ecoli | hcab_ecoli  | lpxA | hcaB |

|        |                            |                             |      |      |
|--------|----------------------------|-----------------------------|------|------|
| P0A6X3 | <a href="#">lpxa_ecoli</a> | <a href="#">hfq_ecoli</a>   | lpxA | hfq  |
| P0AEZ7 | <a href="#">lpxa_ecoli</a> | <a href="#">mltd_ecoli</a>  | lpxA | mltD |
| P0A772 | <a href="#">lpxa_ecoli</a> | <a href="#">nrld_ecoli</a>  | lpxA | nrld |
| Q46920 | <a href="#">lpxa_ecoli</a> | <a href="#">quef_ecoli</a>  | lpxA | queF |
| P0A7J0 | <a href="#">lpxa_ecoli</a> | <a href="#">ribb_ecoli</a>  | lpxA | ribB |
| P0A7J3 | <a href="#">lpxa_ecoli</a> | <a href="#">rl10_ecoli</a>  | lpxA | rplJ |
| P0AA10 | <a href="#">lpxa_ecoli</a> | <a href="#">rl13_ecoli</a>  | lpxA | rplM |
| P0ADY3 | <a href="#">lpxa_ecoli</a> | <a href="#">rl14_ecoli</a>  | lpxA | rplN |
| P02413 | <a href="#">lpxa_ecoli</a> | <a href="#">rl15_ecoli</a>  | lpxA | rplO |
| P0AG44 | <a href="#">lpxa_ecoli</a> | <a href="#">rl17_ecoli</a>  | lpxA | rplQ |
| P0A7L3 | <a href="#">lpxa_ecoli</a> | <a href="#">rl20_ecoli</a>  | lpxA | rplT |
| P0AG48 | <a href="#">lpxa_ecoli</a> | <a href="#">rl21_ecoli</a>  | lpxA | rplU |
| P61175 | <a href="#">lpxa_ecoli</a> | <a href="#">rl22_ecoli</a>  | lpxA | rplV |
| P60624 | <a href="#">lpxa_ecoli</a> | <a href="#">rl24_ecoli</a>  | lpxA | rplX |
| P0A7M2 | <a href="#">lpxa_ecoli</a> | <a href="#">rl28_ecoli</a>  | lpxA | rpmB |
| P60438 | <a href="#">lpxa_ecoli</a> | <a href="#">rl3_ecoli</a>   | lpxA | rplC |
| P0A7N9 | <a href="#">lpxa_ecoli</a> | <a href="#">rl33_ecoli</a>  | lpxA | rpmG |
| P0AG55 | <a href="#">lpxa_ecoli</a> | <a href="#">rl6_ecoli</a>   | lpxA | rplF |
| P0AG55 | <a href="#">lpxa_ecoli</a> | <a href="#">rl6_ecoli</a>   | lpxA | rplF |
| P0A7K2 | <a href="#">lpxa_ecoli</a> | <a href="#">rl7_ecoli</a>   | lpxA | rplL |
| P0A7R5 | <a href="#">lpxa_ecoli</a> | <a href="#">rs10_ecoli</a>  | lpxA | rpsJ |
| P0A7V0 | <a href="#">lpxa_ecoli</a> | <a href="#">rs2_ecoli</a>   | lpxA | rpsB |
| P0A7U7 | <a href="#">lpxa_ecoli</a> | <a href="#">rs20_ecoli</a>  | lpxA | rpsT |
| P0A7V8 | <a href="#">lpxa_ecoli</a> | <a href="#">rs4_ecoli</a>   | lpxA | rpsD |
| P0A7X3 | <a href="#">lpxa_ecoli</a> | <a href="#">rs9_ecoli</a>   | lpxA | rpsI |
| P04693 | <a href="#">lpxa_ecoli</a> | <a href="#">tyrb_ecoli</a>  | lpxA | tyrB |
| P08245 | <a href="#">lpxa_ecoli</a> | <a href="#">ycih_ecoli</a>  | lpxA | yciH |
| P77781 | <a href="#">lpxa_ecoli</a> | <a href="#">ydii_ecoli</a>  | lpxA | ydii |
| P0ADK8 | <a href="#">lpxa_ecoli</a> | <a href="#">yibl_ecoli</a>  | lpxA | yibL |
|        |                            |                             |      |      |
| P0A6F5 | <a href="#">lpxb_ecoli</a> | <a href="#">ch60_ecoli</a>  | lpxB | groL |
| P0A6J5 | <a href="#">lpxb_ecoli</a> | <a href="#">dada_ecoli</a>  | lpxB | dadA |
| P0AC41 | <a href="#">lpxb_ecoli</a> | <a href="#">dhsa_ecoli</a>  | lpxB | sdhA |
| P08622 | <a href="#">lpxb_ecoli</a> | <a href="#">dnaj_ecoli</a>  | lpxB | dnaJ |
| P0CE47 | <a href="#">lpxb_ecoli</a> | <a href="#">eftu1_ecoli</a> | lpxB | tufA |
| P0CE47 | <a href="#">lpxb_ecoli</a> | <a href="#">eftu1_ecoli</a> | lpxB | tufA |
| P0A9A9 | <a href="#">lpxb_ecoli</a> | <a href="#">fur_ecoli</a>   | lpxB | fur  |
| P13035 | <a href="#">lpxb_ecoli</a> | <a href="#">glpd_ecoli</a>  | lpxB | glpD |
| P0A717 | <a href="#">lpxb_ecoli</a> | <a href="#">kprs_ecoli</a>  | lpxB | prs  |
| P0A9X4 | <a href="#">lpxb_ecoli</a> | <a href="#">mreb_ecoli</a>  | lpxB | mreB |
| P23538 | <a href="#">lpxb_ecoli</a> | <a href="#">ppsa_ecoli</a>  | lpxB | ppsA |
| P0A7J3 | <a href="#">lpxb_ecoli</a> | <a href="#">rl10_ecoli</a>  | lpxB | rplJ |
| P0AA10 | <a href="#">lpxb_ecoli</a> | <a href="#">rl13_ecoli</a>  | lpxB | rplM |
| P0A7K6 | <a href="#">lpxb_ecoli</a> | <a href="#">rl19_ecoli</a>  | lpxB | rplS |
| P0A7V0 | <a href="#">lpxb_ecoli</a> | <a href="#">rs2_ecoli</a>   | lpxB | rpsB |

|        |                            |                            |      |      |
|--------|----------------------------|----------------------------|------|------|
| P33226 | <a href="#">lpxb_ecoli</a> | <a href="#">torc_ecoli</a> | lpxB | torC |
| P60932 | <a href="#">lpxb_ecoli</a> | <a href="#">uppp_ecoli</a> | lpxB | uppp |
| P39177 | <a href="#">lpxb_ecoli</a> | <a href="#">uspg_ecoli</a> | lpxB | uspG |
| P0AAE5 | <a href="#">lpxd_ecoli</a> | <a href="#">arcd_ecoli</a> | lpxD | ydgI |
| P0AC38 | <a href="#">lpxd_ecoli</a> | <a href="#">aspa_ecoli</a> | lpxD | aspA |
| P36659 | <a href="#">lpxd_ecoli</a> | <a href="#">cbpa_ecoli</a> | lpxD | cbpA |
| P36659 | <a href="#">lpxd_ecoli</a> | <a href="#">cbpa_ecoli</a> | lpxD | cbpA |
| P0ABL8 | <a href="#">lpxd_ecoli</a> | <a href="#">ccmb_ecoli</a> | lpxD | ccmB |
| Q46925 | <a href="#">lpxd_ecoli</a> | <a href="#">csda_ecoli</a> | lpxD | csdA |
| P0AC41 | <a href="#">lpxd_ecoli</a> | <a href="#">dhsa_ecoli</a> | lpxD | sdhA |
| P08622 | <a href="#">lpxd_ecoli</a> | <a href="#">dnaj_ecoli</a> | lpxD | dnaJ |
| P67910 | <a href="#">lpxd_ecoli</a> | <a href="#">hldd_ecoli</a> | lpxD | hldD |
| P0A722 | <a href="#">lpxd_ecoli</a> | <a href="#">lpxa_ecoli</a> | lpxD | lpxA |
| P0AFJ1 | <a href="#">lpxd_ecoli</a> | <a href="#">phna_ecoli</a> | lpxD | phnA |
| P23830 | <a href="#">lpxd_ecoli</a> | <a href="#">pss_ecoli</a>  | lpxD | pssA |
| P0AG30 | <a href="#">lpxd_ecoli</a> | <a href="#">rho_ecoli</a>  | lpxD | rho  |
| P0A7L0 | <a href="#">lpxd_ecoli</a> | <a href="#">rl1_ecoli</a>  | lpxD | rplA |
| P0A7J7 | <a href="#">lpxd_ecoli</a> | <a href="#">rl11_ecoli</a> | lpxD | rplK |
| P0AA10 | <a href="#">lpxd_ecoli</a> | <a href="#">rl13_ecoli</a> | lpxD | rplM |
| P02413 | <a href="#">lpxd_ecoli</a> | <a href="#">rl15_ecoli</a> | lpxD | rplO |
| P02413 | <a href="#">lpxd_ecoli</a> | <a href="#">rl15_ecoli</a> | lpxD | rplO |
| P0ADY7 | <a href="#">lpxd_ecoli</a> | <a href="#">rl16_ecoli</a> | lpxD | rplP |
| P0C018 | <a href="#">lpxd_ecoli</a> | <a href="#">rl18_ecoli</a> | lpxD | rplR |
| P0A7K6 | <a href="#">lpxd_ecoli</a> | <a href="#">rl19_ecoli</a> | lpxD | rplS |
| P60422 | <a href="#">lpxd_ecoli</a> | <a href="#">rl2_ecoli</a>  | lpxD | rplB |
| P60422 | <a href="#">lpxd_ecoli</a> | <a href="#">rl2_ecoli</a>  | lpxD | rplB |
| P0A7L3 | <a href="#">lpxd_ecoli</a> | <a href="#">rl20_ecoli</a> | lpxD | rplT |
| P0AG48 | <a href="#">lpxd_ecoli</a> | <a href="#">rl21_ecoli</a> | lpxD | rplU |
| P0AG48 | <a href="#">lpxd_ecoli</a> | <a href="#">rl21_ecoli</a> | lpxD | rplU |
| P61175 | <a href="#">lpxd_ecoli</a> | <a href="#">rl22_ecoli</a> | lpxD | rplV |
| P60624 | <a href="#">lpxd_ecoli</a> | <a href="#">rl24_ecoli</a> | lpxD | rplX |
| P60438 | <a href="#">lpxd_ecoli</a> | <a href="#">rl3_ecoli</a>  | lpxD | rplC |
| P0A7N9 | <a href="#">lpxd_ecoli</a> | <a href="#">rl33_ecoli</a> | lpxD | rpmG |
| P60723 | <a href="#">lpxd_ecoli</a> | <a href="#">rl4_ecoli</a>  | lpxD | rplD |
| P60723 | <a href="#">lpxd_ecoli</a> | <a href="#">rl4_ecoli</a>  | lpxD | rplD |
| P60723 | <a href="#">lpxd_ecoli</a> | <a href="#">rl4_ecoli</a>  | lpxD | rplD |
| P0A7K2 | <a href="#">lpxd_ecoli</a> | <a href="#">rl7_ecoli</a>  | lpxD | rplL |
| P0A7R1 | <a href="#">lpxd_ecoli</a> | <a href="#">rl9_ecoli</a>  | lpxD | rplI |
| P0A7R1 | <a href="#">lpxd_ecoli</a> | <a href="#">rl9_ecoli</a>  | lpxD | rplI |
| P75864 | <a href="#">lpxd_ecoli</a> | <a href="#">rlmI_ecoli</a> | lpxD | rlmL |
| P37765 | <a href="#">lpxd_ecoli</a> | <a href="#">rlub_ecoli</a> | lpxD | rluB |
| P0AFW4 | <a href="#">lpxd_ecoli</a> | <a href="#">rnk_ecoli</a>  | lpxD | rnk  |
| P0A8T7 | <a href="#">lpxd_ecoli</a> | <a href="#">rpoc_ecoli</a> | lpxD | rpoC |
| P0A7R5 | <a href="#">lpxd_ecoli</a> | <a href="#">rs10_ecoli</a> | lpxD | rpsJ |

|        |                            |                            |      |       |
|--------|----------------------------|----------------------------|------|-------|
| P0A7S9 | <a href="#">lpxd_ecoli</a> | <a href="#">rs13_ecoli</a> | lpxD | rpsM  |
| P0A7T3 | <a href="#">lpxd_ecoli</a> | <a href="#">rs16_ecoli</a> | lpxD | rpsP  |
| P0A7T7 | <a href="#">lpxd_ecoli</a> | <a href="#">rs18_ecoli</a> | lpxD | rpsR  |
| P0A7T7 | <a href="#">lpxd_ecoli</a> | <a href="#">rs18_ecoli</a> | lpxD | rpsR  |
| P0A7V0 | <a href="#">lpxd_ecoli</a> | <a href="#">rs2_ecoli</a>  | lpxD | rpsB  |
| P0A7V0 | <a href="#">lpxd_ecoli</a> | <a href="#">rs2_ecoli</a>  | lpxD | rpsB  |
| P0A7U7 | <a href="#">lpxd_ecoli</a> | <a href="#">rs20_ecoli</a> | lpxD | rpsT  |
| P0A7V3 | <a href="#">lpxd_ecoli</a> | <a href="#">rs3_ecoli</a>  | lpxD | rpsC  |
| P0A7V3 | <a href="#">lpxd_ecoli</a> | <a href="#">rs3_ecoli</a>  | lpxD | rpsC  |
| P0A7V3 | <a href="#">lpxd_ecoli</a> | <a href="#">rs3_ecoli</a>  | lpxD | rpsC  |
| P0A7V8 | <a href="#">lpxd_ecoli</a> | <a href="#">rs4_ecoli</a>  | lpxD | rpsD  |
| P0A7V8 | <a href="#">lpxd_ecoli</a> | <a href="#">rs4_ecoli</a>  | lpxD | rpsD  |
| P0A7V8 | <a href="#">lpxd_ecoli</a> | <a href="#">rs4_ecoli</a>  | lpxD | rpsD  |
| P0A7W1 | <a href="#">lpxd_ecoli</a> | <a href="#">rs5_ecoli</a>  | lpxD | rpsE  |
| P0A7W1 | <a href="#">lpxd_ecoli</a> | <a href="#">rs5_ecoli</a>  | lpxD | rpsE  |
| P02359 | <a href="#">lpxd_ecoli</a> | <a href="#">rs7_ecoli</a>  | lpxD | rpsG  |
| P02359 | <a href="#">lpxd_ecoli</a> | <a href="#">rs7_ecoli</a>  | lpxD | rpsG  |
| P02359 | <a href="#">lpxd_ecoli</a> | <a href="#">rs7_ecoli</a>  | lpxD | rpsG  |
| P0A7W7 | <a href="#">lpxd_ecoli</a> | <a href="#">rs8_ecoli</a>  | lpxD | rpsH  |
| P0A7X3 | <a href="#">lpxd_ecoli</a> | <a href="#">rs9_ecoli</a>  | lpxD | rpsI  |
| P00962 | <a href="#">lpxd_ecoli</a> | <a href="#">syq_ecoli</a>  | lpxD | glnS  |
| P07023 | <a href="#">lpxd_ecoli</a> | <a href="#">tyra_ecoli</a> | lpxD | tyrA  |
| P76160 | <a href="#">lpxd_ecoli</a> | <a href="#">ydfR_ecoli</a> | lpxD | ydfR  |
| P0AGJ5 | <a href="#">lpxd_ecoli</a> | <a href="#">yfif_ecoli</a> | lpxD | yfiF  |
| P0AGK4 | <a href="#">lpxd_ecoli</a> | <a href="#">yhby_ecoli</a> | lpxD | yhbyY |
| P0AF76 | <a href="#">lpxd_ecoli</a> | <a href="#">yjfi_ecoli</a> | lpxD | yjfi  |
|        |                            |                            |      |       |
| P18843 | <a href="#">lrp_ecoli</a>  | <a href="#">nade_ecoli</a> | lrp  | nadE  |
| P0A9P4 | <a href="#">lrp_ecoli</a>  | <a href="#">trxb_ecoli</a> | lrp  | trxB  |
|        |                            |                            |      |       |
| P18843 | <a href="#">ltae_ecoli</a> | <a href="#">nade_ecoli</a> | ltaE | nadE  |
|        |                            |                            |      |       |
| P00722 | <a href="#">luxs_ecoli</a> | <a href="#">bgal_ecoli</a> | luxS | lacZ  |
| P0A6Y8 | <a href="#">luxs_ecoli</a> | <a href="#">dnak_ecoli</a> | luxS | dnaK  |
| P52645 | <a href="#">luxs_ecoli</a> | <a href="#">ydbH_ecoli</a> | luxS | ydbH  |
|        |                            |                            |      |       |
| P0A910 | <a href="#">lysd_ecoli</a> | <a href="#">ompa_ecoli</a> | arrD | ompA  |
|        |                            |                            |      |       |
| P27129 | <a href="#">lysr_ecoli</a> | <a href="#">rfaj_ecoli</a> | lysr | rfaj  |



|        |                            |                             |      |      |
|--------|----------------------------|-----------------------------|------|------|
| P0A6F5 | <a href="#">malt_ecoli</a> | <a href="#">ch60_ecoli</a>  | malT | groL |
| P08622 | <a href="#">malt_ecoli</a> | <a href="#">dnaj_ecoli</a>  | malT | dnaJ |
| P0CE47 | <a href="#">malt_ecoli</a> | <a href="#">eftu1_ecoli</a> | malT | tufA |
| P31574 | <a href="#">malt_ecoli</a> | <a href="#">fixb_ecoli</a>  | malT | fixB |
| P52613 | <a href="#">malt_ecoli</a> | <a href="#">flij_ecoli</a>  | malT | fliJ |
| P0A817 | <a href="#">malt_ecoli</a> | <a href="#">metk_ecoli</a>  | malT | metK |
| P0A9X4 | <a href="#">malt_ecoli</a> | <a href="#">mreb_ecoli</a>  | malT | mreB |
| P0AAH0 | <a href="#">malt_ecoli</a> | <a href="#">pstb_ecoli</a>  | malT | pstB |
| P0AG30 | <a href="#">malt_ecoli</a> | <a href="#">rho_ecoli</a>   | malT | rho  |
| P0A7K6 | <a href="#">malt_ecoli</a> | <a href="#">rl19_ecoli</a>  | malT | rpIS |

|        |                            |                            |      |      |
|--------|----------------------------|----------------------------|------|------|
| P31119 | <a href="#">mana_ecoli</a> | <a href="#">aas_ecoli</a>  | manA | aas  |
| P12999 | <a href="#">mana_ecoli</a> | <a href="#">bioc_ecoli</a> | manA | bioC |
| P0AC53 | <a href="#">mana_ecoli</a> | <a href="#">g6pd_ecoli</a> | manA | zwf  |
| P0AAJ8 | <a href="#">mana_ecoli</a> | <a href="#">hyba_ecoli</a> | manA | hybA |
| P0A717 | <a href="#">mana_ecoli</a> | <a href="#">kprs_ecoli</a> | manA | prs  |
| P21517 | <a href="#">mana_ecoli</a> | <a href="#">malz_ecoli</a> | manA | malZ |
| P18196 | <a href="#">mana_ecoli</a> | <a href="#">minc_ecoli</a> | manA | minC |
| P0AF16 | <a href="#">mana_ecoli</a> | <a href="#">mvin_ecoli</a> | manA | mviN |
| P18843 | <a href="#">mana_ecoli</a> | <a href="#">nade_ecoli</a> | manA | nadE |
| P76161 | <a href="#">mana_ecoli</a> | <a href="#">req2_ecoli</a> | manA | quuQ |
| P45748 | <a href="#">mana_ecoli</a> | <a href="#">rimn_ecoli</a> | manA | rimN |
| P60422 | <a href="#">mana_ecoli</a> | <a href="#">rl2_ecoli</a>  | manA | rpIB |
| P75864 | <a href="#">mana_ecoli</a> | <a href="#">rlml_ecoli</a> | manA | rlmL |
| P04805 | <a href="#">mana_ecoli</a> | <a href="#">sye_ecoli</a>  | manA | gltX |
| P07024 | <a href="#">mana_ecoli</a> | <a href="#">usha_ecoli</a> | manA | ushA |
| P37339 | <a href="#">mana_ecoli</a> | <a href="#">ygaf_ecoli</a> | manA | ygaF |
| P31448 | <a href="#">mana_ecoli</a> | <a href="#">yidk_ecoli</a> | manA | yidK |
| P77536 | <a href="#">mana_ecoli</a> | <a href="#">ykgf_ecoli</a> | manA | ykgF |
| P42620 | <a href="#">mana_ecoli</a> | <a href="#">yqjg_ecoli</a> | manA | yqjG |

|        |                            |                            |      |      |
|--------|----------------------------|----------------------------|------|------|
| P22523 | <a href="#">masy_ecoli</a> | <a href="#">mukb_ecoli</a> | aceB | mukB |
| P07118 | <a href="#">masz_ecoli</a> | <a href="#">syv_ecoli</a>  | glcB | valS |

|        |                            |                            |      |      |
|--------|----------------------------|----------------------------|------|------|
| P0A6F5 | <a href="#">mdab_ecoli</a> | <a href="#">ch60_ecoli</a> | mdaB | groL |
| P0ABK9 | <a href="#">mdab_ecoli</a> | <a href="#">nrfa_ecoli</a> | mdaB | nrfA |

|        |                            |                             |      |      |
|--------|----------------------------|-----------------------------|------|------|
| P60438 | <a href="#">mdh_ecoli</a>  | <a href="#">rl3_ecoli</a>   | mdh  | rpIC |
| P0A7V8 | <a href="#">mdh_ecoli</a>  | <a href="#">rs4_ecoli</a>   | mdh  | rpsD |
| P0A8N3 | <a href="#">mdh_ecoli</a>  | <a href="#">syk1_ecoli</a>  | mdh  | lysS |
| P07813 | <a href="#">mdh_ecoli</a>  | <a href="#">syl_ecoli</a>   | mdh  | leuS |
| P0A8G3 | <a href="#">mdh_ecoli</a>  | <a href="#">uxac_ecoli</a>  | mdh  | uxaC |
| P37636 | <a href="#">mdte_ecoli</a> | <a href="#">mdte_ecoli</a>  | mdtE | mdtE |
| P37636 | <a href="#">mdte_ecoli</a> | <a href="#">mdte_ecoli</a>  | mdtE | mdtE |
| P67910 | <a href="#">menb_ecoli</a> | <a href="#">hlDD_ecoli</a>  | menB | hldD |
| P67910 | <a href="#">menb_ecoli</a> | <a href="#">hlDD_ecoli</a>  | menB | hldD |
| P18843 | <a href="#">menb_ecoli</a> | <a href="#">nade_ecoli</a>  | menB | nadE |
| P15288 | <a href="#">menb_ecoli</a> | <a href="#">pepd_ecoli</a>  | menB | pepD |
| P0AG59 | <a href="#">menb_ecoli</a> | <a href="#">rs14_ecoli</a>  | menB | rpsN |
| P77671 | <a href="#">mete_ecoli</a> | <a href="#">allb_ecoli</a>  | metE | allB |
| P77188 | <a href="#">mete_ecoli</a> | <a href="#">matc_ecoli</a>  | metE | matC |
| P0A9T0 | <a href="#">mete_ecoli</a> | <a href="#">sera_ecoli</a>  | metE | serA |
| P76115 | <a href="#">mete_ecoli</a> | <a href="#">yncd_ecoli</a>  | metE | yncD |
| P33363 | <a href="#">meth_ecoli</a> | <a href="#">bglx_ecoli</a>  | metH | bgIX |
| P10443 | <a href="#">meth_ecoli</a> | <a href="#">dpo3a_ecoli</a> | metH | dnaE |
| P09831 | <a href="#">meth_ecoli</a> | <a href="#">gltb_ecoli</a>  | metH | glTB |
| P05793 | <a href="#">meth_ecoli</a> | <a href="#">ilvc_ecoli</a>  | metH | ilvC |
| P0A6F5 | <a href="#">metk_ecoli</a> | <a href="#">ch60_ecoli</a>  | metK | groL |
| P39099 | <a href="#">metk_ecoli</a> | <a href="#">degq_ecoli</a>  | metK | degQ |
| P08622 | <a href="#">metk_ecoli</a> | <a href="#">dnaj_ecoli</a>  | metK | dnaJ |
| P08622 | <a href="#">metk_ecoli</a> | <a href="#">dnaj_ecoli</a>  | metK | dnaJ |
| P0A6Y8 | <a href="#">metk_ecoli</a> | <a href="#">dnak_ecoli</a>  | metK | dnaK |
| P0CE47 | <a href="#">metk_ecoli</a> | <a href="#">eftu1_ecoli</a> | metK | tufA |
| P0CE47 | <a href="#">metk_ecoli</a> | <a href="#">eftu1_ecoli</a> | metK | tufA |
| P0AAJ3 | <a href="#">metk_ecoli</a> | <a href="#">fdnh_ecoli</a>  | metK | fdnH |
| P75938 | <a href="#">metk_ecoli</a> | <a href="#">flgf_ecoli</a>  | metK | flgF |
| P52612 | <a href="#">metk_ecoli</a> | <a href="#">flii_ecoli</a>  | metK | fliI |
| P33135 | <a href="#">metk_ecoli</a> | <a href="#">flir_ecoli</a>  | metK | fliR |
| P0ABY2 | <a href="#">metk_ecoli</a> | <a href="#">fliT_ecoli</a>  | metK | fliT |
| P0A717 | <a href="#">metk_ecoli</a> | <a href="#">kprs_ecoli</a>  | metK | prs  |
| P0A9X4 | <a href="#">metk_ecoli</a> | <a href="#">mreb_ecoli</a>  | metK | mreB |
| P18843 | <a href="#">metk_ecoli</a> | <a href="#">nade_ecoli</a>  | metK | nadE |
| P16690 | <a href="#">metk_ecoli</a> | <a href="#">phnn_ecoli</a>  | metK | phnN |
| P0AAH0 | <a href="#">metk_ecoli</a> | <a href="#">pstb_ecoli</a>  | metK | pstB |
| P0A7G6 | <a href="#">metk_ecoli</a> | <a href="#">reca_ecoli</a>  | metK | recA |

|        |            |             |      |      |
|--------|------------|-------------|------|------|
| P10408 | metk_ecoli | seca_ecoli  | metK | secA |
| P60651 | metk_ecoli | speb_ecoli  | metK | speB |
| P00960 | metk_ecoli | syga_ecoli  | metK | glyQ |
| P0A850 | metk_ecoli | tig_ecoli   | metK | tig  |
| P28915 | metk_ecoli | ybfc_ecoli  | metK | ybfC |
| P0A6Y8 | metq_ecoli | dnak_ecoli  | metQ | dnaK |
| P0A6X7 | mfd_ecoli  | ihfa_ecoli  | mfd  | ihfA |
| P31600 | mfd_ecoli  | nfra_ecoli  | mfd  | nfrA |
| P60422 | mfd_ecoli  | rl2_ecoli   | mfd  | rplB |
| P0A7S9 | mfd_ecoli  | rs13_ecoli  | mfd  | rpsM |
| P0ACG1 | mfd_ecoli  | stpa_ecoli  | mfd  | stpA |
| P0AAD8 | mfd_ecoli  | tdcc_ecoli  | mfd  | tdcC |
| P64521 | mfd_ecoli  | yeet_ecoli  | mfd  | yeeT |
| P24178 | mfd_ecoli  | yffb_ecoli  | mfd  | yffB |
| P0A6F5 | miab_ecoli | ch60_ecoli  | miaB | groL |
| P0AC41 | miab_ecoli | dhsa_ecoli  | miaB | sdhA |
| P08622 | miab_ecoli | dnaj_ecoli  | miaB | dnaJ |
| P0A6Y8 | miab_ecoli | dnak_ecoli  | miaB | dnaK |
| P0CE47 | miab_ecoli | eftu1_ecoli | miaB | tufA |
| P0CE47 | miab_ecoli | eftu1_ecoli | miaB | tufA |
| P45395 | miab_ecoli | kdsd_ecoli  | miaB | kdsD |
| P0A717 | miab_ecoli | kprs_ecoli  | miaB | prs  |
| P0A9X4 | miab_ecoli | mreb_ecoli  | miaB | mreB |
| P0AAH0 | miab_ecoli | pstb_ecoli  | miaB | pstB |
| P60422 | miab_ecoli | rl2_ecoli   | miaB | rplB |
| P60723 | miab_ecoli | rl4_ecoli   | miaB | rplD |
| P0AFD1 | minc_ecoli | nuoe_ecoli  | minC | nuoE |
| P60422 | minc_ecoli | rl2_ecoli   | minC | rplB |
| P62399 | minc_ecoli | rl5_ecoli   | minC | rplE |
| P0A7V0 | minc_ecoli | rs2_ecoli   | minC | rpsB |
| P0A7V3 | minc_ecoli | rs3_ecoli   | minC | rpsC |
| P0A7V8 | minc_ecoli | rs4_ecoli   | minC | rpsD |
| P0A9K9 | minc_ecoli | slyd_ecoli  | minC | slyD |
| P0AGC7 | minc_ecoli | smp_ecoli   | minC | smp  |
| P37646 | minc_ecoli | yhjh_ecoli  | minC | yhjH |
| P0ABT2 | mine_ecoli | dps_ecoli   | minE | dps  |
| P18843 | mine_ecoli | nade_ecoli  | minE | nadE |
| P0AFD1 | mine_ecoli | nuoe_ecoli  | minE | nuoE |

|        |            |             |      |       |
|--------|------------|-------------|------|-------|
| P0AFD6 | mine_ecoli | nuoi_ecoli  | minE | nuol  |
| P62399 | mine_ecoli | rl5_ecoli   | minE | rpIE  |
| P0AG55 | mine_ecoli | rl6_ecoli   | minE | rpIF  |
| P0A6Y8 | mlac_ecoli | dnak_ecoli  | mIaC | dnaK  |
| P0A7V0 | mlac_ecoli | rs2_ecoli   | mIaC | rpsB  |
| P0A6Y8 | mmum_ecoli | dnak_ecoli  | mmuM | dnaK  |
| P18843 | mmum_ecoli | nade_ecoli  | mmuM | nadE  |
| P0A6F5 | mngb_ecoli | ch60_ecoli  | mngB | groL  |
| P0AC41 | mngb_ecoli | dhsa_ecoli  | mngB | sdhA  |
| P24183 | mngb_ecoli | fdng_ecoli  | mngB | fdnG  |
| P0A7M2 | mngb_ecoli | rl28_ecoli  | mngB | rpmB  |
| P0A717 | mngr_ecoli | kprs_ecoli  | mngR | prs   |
| P0A7M2 | mngr_ecoli | rl28_ecoli  | mngR | rpmB  |
| P0A7N4 | mngr_ecoli | rl32_ecoli  | mngR | rpmF  |
| P61887 | mngr_ecoli | rmla2_ecoli | mngR | rmlA2 |
| P18843 | mnma_ecoli | nade_ecoli  | mnmA | nadE  |
| P60422 | mnma_ecoli | rl2_ecoli   | mnmA | rpIB  |
| P0A6F5 | moaa_ecoli | ch60_ecoli  | moaA | groL  |
| P0A6F5 | moaa_ecoli | ch60_ecoli  | moaA | groL  |
| P0A6F5 | moaa_ecoli | ch60_ecoli  | moaA | groL  |
| P07363 | moaa_ecoli | chea_ecoli  | moaA | cheA  |
| P0CE47 | moaa_ecoli | eftu1_ecoli | moaA | tufA  |
| P0AES6 | moaa_ecoli | gyrb_ecoli  | moaA | gyrB  |
| P18843 | moaa_ecoli | nade_ecoli  | moaA | nadE  |
| P0A7J0 | moaa_ecoli | ribb_ecoli  | moaA | ribB  |
| P0AG48 | moaa_ecoli | rl21_ecoli  | moaA | rpIU  |
| P02359 | moaa_ecoli | rs7_ecoli   | moaA | rpsG  |
| P0A832 | moaa_ecoli | ssrp_ecoli  | moaA | smpB  |
| P75693 | moaa_ecoli | yahn_ecoli  | moaA | yahN  |
| P76104 | moaa_ecoli | ydcP_ecoli  | moaA | ydcP  |
| P0A7M2 | moab_ecoli | rl28_ecoli  | moaB | rpmB  |
| P75977 | moab_ecoli | ymfm_ecoli  | moaB | ymfM  |

|        |            |             |      |      |
|--------|------------|-------------|------|------|
| P0A6E4 | moea_ecoli | assy_ecoli  | moeA | argG |
| P0A796 | moea_ecoli | k6pf1_ecoli | moeA | pfkA |
| P77188 | moea_ecoli | matc_ecoli  | moeA | matC |
| P32173 | moea_ecoli | moba_ecoli  | moeA | mobA |
| P32173 | moea_ecoli | moba_ecoli  | moeA | mobA |
| P32173 | moea_ecoli | moba_ecoli  | moeA | mobA |
| P12281 | moea_ecoli | moea_ecoli  | moeA | moeA |
| P0AF03 | moea_ecoli | mog_ecoli   | moeA | mog  |
| P18843 | moea_ecoli | nade_ecoli  | moeA | nadE |
|        |            |             |      |      |
| P0A6F5 | molr_ecoli | ch60_ecoli  | yehH | groL |
|        |            |             |      |      |
| P0AAZ4 | mpl_ecoli  | rara_ecoli  | mpl  | rara |
|        |            |             |      |      |
| P00722 | mpra_ecoli | bgal_ecoli  | mprA | lacZ |
| P0A6M8 | mpra_ecoli | efg_ecoli   | mprA | fusA |
| P07762 | mpra_ecoli | glgb_ecoli  | mprA | glgB |
| P41443 | mpra_ecoli | gsph_ecoli  | mprA | hofH |
| P31658 | mpra_ecoli | hcha_ecoli  | mprA | hchA |
| P19319 | mpra_ecoli | narz_ecoli  | mprA | narZ |
| P33602 | mpra_ecoli | nuog_ecoli  | mprA | nuoG |
| Q57083 | mpra_ecoli | perr_ecoli  | mprA | perR |
| P00957 | mpra_ecoli | sya_ecoli   | mprA | alaS |
| P76343 | mpra_ecoli | yedz_ecoli  | mprA | yedZ |
|        |            |             |      |      |
| P0A6F5 | mrAZ_ecoli | ch60_ecoli  | mrAZ | groL |
| P75938 | mrAZ_ecoli | flgf_ecoli  | mrAZ | flgF |
| P0AEM6 | mrAZ_ecoli | flia_ecoli  | mrAZ | fliA |
| P0A717 | mrAZ_ecoli | kprs_ecoli  | mrAZ | prs  |
| P22186 | mrAZ_ecoli | mrAZ_ecoli  | mrAZ | mrAZ |
|        |            |             |      |      |
| P0ABD5 | mreb_ecoli | acca_ecoli  | mreB | accA |
| P22333 | mreb_ecoli | add_ecoli   | mreB | add  |
| P0ABB4 | mreb_ecoli | atpb_ecoli  | mreB | atpD |
| P0A6F5 | mreb_ecoli | ch60_ecoli  | mreB | groL |
| P0A6F5 | mreb_ecoli | ch60_ecoli  | mreB | groL |
| P63284 | mreb_ecoli | clpb_ecoli  | mreB | clpB |
| P08622 | mreb_ecoli | dnaj_ecoli  | mreB | dnaJ |
| P08622 | mreb_ecoli | dnaj_ecoli  | mreB | dnaJ |
| P0A6Y8 | mreb_ecoli | dnak_ecoli  | mreB | dnaK |
| P0A6Y8 | mreb_ecoli | dnak_ecoli  | mreB | dnaK |
| P0A6M8 | mreb_ecoli | efg_ecoli   | mreB | fusA |

|        |            |             |      |       |
|--------|------------|-------------|------|-------|
| POCE47 | mreb_ecoli | eftu1_ecoli | mreB | tufA  |
| POCE47 | mreb_ecoli | eftu1_ecoli | mreB | tufA  |
| POC8J6 | mreb_ecoli | gaty_ecoli  | mreB | gatY  |
| POAES4 | mreb_ecoli | gyra_ecoli  | mreB | gyrA  |
| POC054 | mreb_ecoli | ibpa_ecoli  | mreB | ibpA  |
| P03819 | mreb_ecoli | kefc_ecoli  | mreB | kefC  |
| P68187 | mreb_ecoli | malk_ecoli  | mreB | malkK |
| P06993 | mreb_ecoli | malt_ecoli  | mreB | malT  |
| P0AEI1 | mreb_ecoli | miab_ecoli  | mreB | miaB  |
| P0AEZ3 | mreb_ecoli | mind_ecoli  | mreB | minD  |
| P09152 | mreb_ecoli | narg_ecoli  | mreB | narG  |
| P33599 | mreb_ecoli | nuocd_ecoli | mreB | nuoC  |
| P0AFG0 | mreb_ecoli | nusg_ecoli  | mreB | nusG  |
| P0A910 | mreb_ecoli | ompa_ecoli  | mreB | ompA  |
| P06996 | mreb_ecoli | ompc_ecoli  | mreB | ompC  |
| P05055 | mreb_ecoli | pnp_ecoli   | mreB | pnp   |
| P0AAH0 | mreb_ecoli | pstb_ecoli  | mreB | pstB  |
| P37188 | mreb_ecoli | ptkb_ecoli  | mreB | gatB  |
| P24554 | mreb_ecoli | rada_ecoli  | mreB | radA  |
| P0A7G6 | mreb_ecoli | reca_ecoli  | mreB | recA  |
| P0AG30 | mreb_ecoli | rho_ecoli   | mreB | rho   |
| P60438 | mreb_ecoli | rl3_ecoli   | mreB | rpIC  |
| P62399 | mreb_ecoli | rl5_ecoli   | mreB | rpIE  |
| P0A8V2 | mreb_ecoli | rpob_ecoli  | mreB | rpoB  |
| P0A8T7 | mreb_ecoli | rpoc_ecoli  | mreB | rpoC  |
| P02358 | mreb_ecoli | rs6_ecoli   | mreB | rpsF  |
| P10408 | mreb_ecoli | seca_ecoli  | mreB | secA  |
| P10408 | mreb_ecoli | seca_ecoli  | mreB | secA  |
| P00960 | mreb_ecoli | syga_ecoli  | mreB | glyQ  |
| P0A8N5 | mreb_ecoli | syk2_ecoli  | mreB | lysU  |
| P39177 | mreb_ecoli | uspg_ecoli  | mreB | uspG  |
| P0A8J4 | mreb_ecoli | ybed_ecoli  | mreB | ybeD  |
| P64476 | mreb_ecoli | ydiH_ecoli  | mreB | ydiH  |
| P0AF90 | mreb_ecoli | yjgd_ecoli  | mreB | yjgD  |

|        |           |            |     |      |
|--------|-----------|------------|-----|------|
| P0AAJ3 | mrp_ecoli | fdnh_ecoli | mrp | fdnH |
| P0A9A9 | mrp_ecoli | fur_ecoli  | mrp | fur  |
| P18843 | mrp_ecoli | nade_ecoli | mrp | nadE |
| P24211 | mrp_ecoli | rhse_ecoli | mrp | rhsE |
| P64574 | mrp_ecoli | yghw_ecoli | mrp | yghW |

|        |            |             |      |      |
|--------|------------|-------------|------|------|
| P36683 | msbb_ecoli | acon2_ecoli | msbB | acnB |
| P35340 | msbb_ecoli | ahpf_ecoli  | msbB | ahpF |
| P0A6F5 | msbb_ecoli | ch60_ecoli  | msbB | groL |
| P63284 | msbb_ecoli | clpb_ecoli  | msbB | clpB |
| P0A6M8 | msbb_ecoli | efg_ecoli   | msbB | fusA |
| P08394 | msbb_ecoli | ex5b_ecoli  | msbB | recB |
| P0AEM9 | msbb_ecoli | fliy_ecoli  | msbB | fliY |
| P0AC53 | msbb_ecoli | g6pd_ecoli  | msbB | zwf  |
| P27249 | msbb_ecoli | glnd_ecoli  | msbB | glnd |
| P13035 | msbb_ecoli | glpd_ecoli  | msbB | glpD |
| P0AES4 | msbb_ecoli | gyra_ecoli  | msbB | gyrA |
| P0ACV0 | msbb_ecoli | htrb_ecoli  | msbB | htrB |
| P33602 | msbb_ecoli | nuog_ecoli  | msbB | nuoG |
| P0AFG8 | msbb_ecoli | odp1_ecoli  | msbB | aceE |
| P0C077 | msbb_ecoli | rele_ecoli  | msbB | relE |
| P0A7S9 | msbb_ecoli | rs13_ecoli  | msbB | rpsM |
| P00957 | msbb_ecoli | sya_ecoli   | msbB | alaS |
| P06612 | msbb_ecoli | top1_ecoli  | msbB | topA |
| P75970 | msbb_ecoli | vxis_ecoli  | msbB | xisE |
| P75977 | msbb_ecoli | ymfm_ecoli  | msbB | ymfM |
| P0ADK0 | mcsS_ecoli | yiaf_ecoli  | mcsS | yiaF |
| P0ACJ0 | msra_ecoli | lrp_ecoli   | msrA | lrp  |
| P23847 | mtld_ecoli | dppa_ecoli  | mtlD | dppA |
| P0ADI4 | mtld_ecoli | entb_ecoli  | mtlD | entB |
| P77504 | mtld_ecoli | ybbp_ecoli  | mtlD | ybbP |
| P76119 | mtld_ecoli | yncl_ecoli  | mtlD | yncl |
| P0A6Y8 | mtnn_ecoli | dnak_ecoli  | mtnN | dnaK |
| P0C8J8 | mtnn_ecoli | gatz_ecoli  | mtnN | gatZ |
| P0A6V1 | mtnn_ecoli | glgc_ecoli  | mtnN | glgC |
| P0A996 | mtnn_ecoli | glpc_ecoli  | mtnN | glpC |
| P45465 | mtnn_ecoli | yran_ecoli  | mtnN | yraN |
| P0AEJ4 | mtox_ecoli | envz_ecoli  | solA | envZ |
| P0ABK9 | mtox_ecoli | nrfa_ecoli  | solA | nrfa |
| P0A7D7 | mtox_ecoli | pur7_ecoli  | solA | purC |
| P60422 | mtox_ecoli | rl2_ecoli   | solA | rplB |
| P0AG71 | mtox_ecoli | rmuc_ecoli  | solA | rmuC |
| P07813 | mtox_ecoli | syl_ecoli   | solA | leuS |
| P0ADK6 | mtox_ecoli | yiba_ecoli  | solA | yibA |
| P16694 | mtox_ecoli | yjda_ecoli  | solA | yjda |

|        |                            |                             |      |      |
|--------|----------------------------|-----------------------------|------|------|
| P0A717 | <a href="#">muke_ecoli</a> | <a href="#">kprs_ecoli</a>  | mukE | prs  |
| P22523 | <a href="#">muke_ecoli</a> | <a href="#">mukb_ecoli</a>  | mukE | mukB |
| P22523 | <a href="#">muke_ecoli</a> | <a href="#">mukb_ecoli</a>  | mukE | mukB |
| P60293 | <a href="#">muke_ecoli</a> | <a href="#">mukf_ecoli</a>  | mukE | mukF |
| P60293 | <a href="#">muke_ecoli</a> | <a href="#">mukf_ecoli</a>  | mukE | mukF |
| P60293 | <a href="#">muke_ecoli</a> | <a href="#">mukf_ecoli</a>  | mukE | mukF |
| P60293 | <a href="#">muke_ecoli</a> | <a href="#">mukf_ecoli</a>  | mukE | mukF |
| P60422 | <a href="#">muke_ecoli</a> | <a href="#">rl2_ecoli</a>   | mukE | rplB |
| P0A7X3 | <a href="#">muke_ecoli</a> | <a href="#">rs9_ecoli</a>   | mukE | rpsI |
| P0A843 | <a href="#">muke_ecoli</a> | <a href="#">tate_ecoli</a>  | mukE | tatE |
| P39321 | <a href="#">muke_ecoli</a> | <a href="#">ytfn_ecoli</a>  | mukE | ytfN |
| P39099 | <a href="#">mura_ecoli</a> | <a href="#">degq_ecoli</a>  | murA | degQ |
| P0CE47 | <a href="#">mura_ecoli</a> | <a href="#">eftu1_ecoli</a> | murA | tufA |
| P0AD68 | <a href="#">mura_ecoli</a> | <a href="#">ftsi_ecoli</a>  | murA | ftsI |
| P30870 | <a href="#">mura_ecoli</a> | <a href="#">glnE_ecoli</a>  | murA | glnE |
| P77188 | <a href="#">mura_ecoli</a> | <a href="#">matc_ecoli</a>  | murA | matC |
| P18843 | <a href="#">mura_ecoli</a> | <a href="#">nade_ecoli</a>  | murA | nadE |
| P37095 | <a href="#">mura_ecoli</a> | <a href="#">pepb_ecoli</a>  | murA | pepB |
| P42184 | <a href="#">mura_ecoli</a> | <a href="#">prsa_ecolx</a>  | murA | prsA |
| P60240 | <a href="#">mura_ecoli</a> | <a href="#">rapa_ecoli</a>  | murA | rapA |
| P0A7J7 | <a href="#">mura_ecoli</a> | <a href="#">rl11_ecoli</a>  | murA | rplK |
| P0AA10 | <a href="#">mura_ecoli</a> | <a href="#">rl13_ecoli</a>  | murA | rplM |
| P61175 | <a href="#">mura_ecoli</a> | <a href="#">rl22_ecoli</a>  | murA | rplV |
| P60723 | <a href="#">mura_ecoli</a> | <a href="#">rl4_ecoli</a>   | murA | rplD |
| P0A7K2 | <a href="#">mura_ecoli</a> | <a href="#">rl7_ecoli</a>   | murA | rplL |
| P0A7R5 | <a href="#">mura_ecoli</a> | <a href="#">rs10_ecoli</a>  | murA | rpsJ |
| P0A7V0 | <a href="#">mura_ecoli</a> | <a href="#">rs2_ecoli</a>   | murA | rpsB |
| P04152 | <a href="#">mura_ecoli</a> | <a href="#">umuc_ecoli</a>  | murA | umuC |
| P0A698 | <a href="#">mura_ecoli</a> | <a href="#">uvra_ecoli</a>  | murA | uvrA |
| P76387 | <a href="#">mura_ecoli</a> | <a href="#">wzc_ecoli</a>   | murA | wzc  |
| P46837 | <a href="#">mura_ecoli</a> | <a href="#">yhgf_ecoli</a>  | murA | yhgF |
| P30847 | <a href="#">muts_ecoli</a> | <a href="#">baes_ecoli</a>  | mutS | baeS |
| P0CE47 | <a href="#">muts_ecoli</a> | <a href="#">eftu1_ecoli</a> | mutS | tufA |
| P0AEJ4 | <a href="#">muts_ecoli</a> | <a href="#">envz_ecoli</a>  | mutS | envZ |
| P0AAB6 | <a href="#">muts_ecoli</a> | <a href="#">galf_ecoli</a>  | mutS | galF |
| P23909 | <a href="#">muts_ecoli</a> | <a href="#">muts_ecoli</a>  | mutS | mutS |
| P77398 | <a href="#">nade_ecoli</a> | <a href="#">arna_ecoli</a>  | nadE | arnA |
| P52043 | <a href="#">nade_ecoli</a> | <a href="#">ygfH_ecoli</a>  | nadE | ygfH |
| P28722 | <a href="#">nade_ecoli</a> | <a href="#">yhca_ecoli</a>  | nadE | yhca |



|        |            |            |      |      |
|--------|------------|------------|------|------|
| P0A6F5 | nagc_ecoli | ch60_ecoli | nagC | groL |
| P0A759 | nagc_ecoli | nagb_ecoli | nagC | nagB |
| P0A7M2 | nagc_ecoli | rl28_ecoli | nagC | rpmB |
| P0AA43 | nagc_ecoli | rsua_ecoli | nagC | rsuA |
| P0A843 | nagc_ecoli | tate_ecoli | nagC | tatE |
| P37639 | nana_ecoli | gadx_ecoli | nanA | gadX |
| P18843 | nana_ecoli | nade_ecoli | nanA | nadE |
| P36566 | nana_ecoli | smta_ecoli | nanA | smtA |

|        |            |             |      |      |
|--------|------------|-------------|------|------|
| P08622 | narg_ecoli | dnaj_ecoli  | narG | dnaj |
| P0CE47 | narg_ecoli | eftu1_ecoli | narG | tufA |
| P67910 | narg_ecoli | hlDD_ecoli  | narG | hldD |
| P0A9X4 | narg_ecoli | mreb_ecoli  | narG | mreB |
| P11349 | narg_ecoli | narh_ecoli  | narG | narH |
| P11349 | narg_ecoli | narh_ecoli  | narG | narH |
| P11349 | narg_ecoli | narh_ecoli  | narG | narH |
| P11349 | narg_ecoli | narh_ecoli  | narG | narH |
| P11349 | narg_ecoli | narh_ecoli  | narG | narH |
| P11349 | narg_ecoli | narh_ecoli  | narG | narH |
| P11350 | narg_ecoli | nari_ecoli  | narG | narI |
| P11350 | narg_ecoli | nari_ecoli  | narG | narI |
| P11350 | narg_ecoli | nari_ecoli  | narG | narI |
| P11350 | narg_ecoli | nari_ecoli  | narG | narI |
| P11350 | narg_ecoli | nari_ecoli  | narG | narI |
| P11350 | narg_ecoli | nari_ecoli  | narG | narI |
| P11350 | narg_ecoli | nari_ecoli  | narG | narI |
| P0AF26 | narg_ecoli | narj_ecoli  | narG | narJ |
| P0AF26 | narg_ecoli | narj_ecoli  | narG | narJ |
| P19318 | narg_ecoli | nary_ecoli  | narG | narY |
| P0A7G6 | narg_ecoli | reca_ecoli  | narG | recA |
| P0A7V8 | narg_ecoli | rs4_ecoli   | narG | rpsD |

|        |            |             |      |      |
|--------|------------|-------------|------|------|
| P0CE47 | narh_ecoli | eftu1_ecoli | narH | tufA |
| P42593 | narh_ecoli | fadh_ecoli  | narH | fadh |
| P18843 | narh_ecoli | nade_ecoli  | narH | nadE |
| P09152 | narh_ecoli | narg_ecoli  | narH | narG |
| P09152 | narh_ecoli | narg_ecoli  | narH | narG |
| P09152 | narh_ecoli | narg_ecoli  | narH | narG |
| P19319 | narh_ecoli | narz_ecoli  | narH | narZ |
| P0AG80 | narh_ecoli | ugpb_ecoli  | narH | ugpB |

|        |            |             |      |      |
|--------|------------|-------------|------|------|
| P15034 | narj_ecoli | ampp_ecoli  | narJ | pepP |
| P0AC41 | narj_ecoli | dhsa_ecoli  | narJ | sdhA |
| P0A9P0 | narj_ecoli | dldh_ecoli  | narJ | lpdA |
| P09152 | narj_ecoli | narg_ecoli  | narJ | narG |
| P09152 | narj_ecoli | narg_ecoli  | narJ | narG |
| P11349 | narj_ecoli | narh_ecoli  | narJ | narH |
| P11349 | narj_ecoli | narh_ecoli  | narJ | narH |
| P19318 | narj_ecoli | nary_ecoli  | narJ | narY |
| P06959 | narj_ecoli | odp2_ecoli  | narJ | aceF |
| P0A910 | narj_ecoli | ompa_ecoli  | narJ | ompA |
| P0A7K2 | narj_ecoli | rl7_ecoli   | narJ | rplL |
| P0AA91 | narj_ecoli | yeay_ecoli  | narJ | yeaY |
| P31434 | narl_ecoli | xyls_ecoli  | narL | yicl |
| P31658 | narp_ecoli | hcha_ecoli  | narP | hchA |
| P0AAL3 | narp_ecoli | napg_ecoli  | narP | napG |
| P0A6Y8 | nfsa_ecoli | dnak_ecoli  | nfsA | dnaK |
| P36683 | nfua_ecoli | acon2_ecoli | nfuA | acnB |
| P69330 | nfua_ecoli | citd_ecoli  | nfuA | citD |
| P0AF08 | nfua_ecoli | mrp_ecoli   | nfuA | mrp  |
| P18843 | nfua_ecoli | nade_ecoli  | nfuA | nadE |
| P75949 | nfua_ecoli | nagz_ecoli  | nfuA | nagZ |
| P33602 | nfua_ecoli | nuog_ecoli  | nfuA | nuoG |
| P0AFG0 | nfua_ecoli | nusg_ecoli  | nfuA | nusG |
| P0A7J3 | nfua_ecoli | rl10_ecoli  | nfuA | rplJ |
| P0ADY3 | nfua_ecoli | rl14_ecoli  | nfuA | rplN |
| P60438 | nfua_ecoli | rl3_ecoli   | nfuA | rplC |
| P0A7V8 | nfua_ecoli | rs4_ecoli   | nfuA | rpsD |
| P30138 | nfua_ecoli | thif_ecoli  | nfuA | thiF |
| P0A6F5 | nhar_ecoli | ch60_ecoli  | nhaR | groL |
| P0A6S0 | nifj_ecoli | flgh_ecoli  | ydbK | flgH |
| P75942 | nifj_ecoli | flgj_ecoli  | ydbK | flgJ |
| P0A8S9 | nifj_ecoli | flhd_ecoli  | ydbK | flhD |
| P76297 | nifj_ecoli | flhe_ecoli  | ydbK | flhE |
| P52647 | nifj_ecoli | nifj_ecoli  | ydbK | ydbK |
| P06612 | nifj_ecoli | top1_ecoli  | ydbK | topA |
| P39280 | nifj_ecoli | yjek_ecoli  | ydbK | yjeK |

|        |             |             |      |      |
|--------|-------------|-------------|------|------|
| P0A717 | nsrr_ecoli  | kprs_ecoli  | nsrR | prs  |
| P0AFB8 | ntrc_ecoli  | ntrc_ecoli  | glnG | glnG |
| P37309 | nudb_ecoli  | arsr_ecoli  | nudB | arsR |
| P0A9P0 | nudb_ecoli  | dldh_ecoli  | nudB | lpdA |
| P0A6Y8 | nudb_ecoli  | dnak_ecoli  | nudB | dnaK |
| P18843 | nudb_ecoli  | nade_ecoli  | nudB | nadE |
| P0AFG8 | nudb_ecoli  | odp1_ecoli  | nudB | aceE |
| P0ADY3 | nudb_ecoli  | rl14_ecoli  | nudB | rpIN |
| P39177 | nudb_ecoli  | uspg_ecoli  | nudB | uspG |
| P36683 | nudk_ecoli  | acon2_ecoli | nudK | acnB |
| P0AE08 | nudk_ecoli  | ahpc_ecoli  | nudK | ahpC |
| P76555 | nudk_ecoli  | eutq_ecoli  | nudK | eutQ |
| P0AF28 | nudk_ecoli  | narI_ecoli  | nudK | narL |
| P0AFG8 | nudk_ecoli  | odp1_ecoli  | nudK | aceE |
| P0A9M8 | nudk_ecoli  | pta_ecoli   | nudK | pta  |
| P0AG55 | nudk_ecoli  | rl6_ecoli   | nudK | rpIF |
| P0A8G0 | nudk_ecoli  | uvrc_ecoli  | nudK | uvrC |
| P0AFC7 | nuocd_ecoli | nuob_ecoli  | nuoC | nuoB |
| P33602 | nuocd_ecoli | nuog_ecoli  | nuoC | nuoG |
| P0A6F5 | nuof_ecoli  | ch60_ecoli  | nuoF | groL |
| P21177 | nuof_ecoli  | fadb_ecoli  | nuoF | fadB |
| P0AFD1 | nuof_ecoli  | nuoe_ecoli  | nuoF | nuoE |
| P33602 | nuof_ecoli  | nuog_ecoli  | nuoF | nuoG |
| P0A8F8 | nuof_ecoli  | uvrb_ecoli  | nuoF | uvrB |
| P0A6E4 | nusa_ecoli  | assy_ecoli  | nusA | argG |
| P0ABE7 | nusa_ecoli  | c562_ecolx  | nusA | cybC |
| P0CE47 | nusa_ecoli  | eftu1_ecoli | nusA | tufA |
| P0A9A9 | nusa_ecoli  | fur_ecoli   | nusA | fur  |
| P0A705 | nusa_ecoli  | if2_ecoli   | nusA | infB |
| P0A705 | nusa_ecoli  | if2_ecoli   | nusA | infB |
| P0A705 | nusa_ecoli  | if2_ecoli   | nusA | infB |

|        |            |            |      |      |
|--------|------------|------------|------|------|
| P0A8U6 | nusa_ecoli | metj_ecoli | nusA | metJ |
| P0AFG8 | nusa_ecoli | odp1_ecoli | nusA | aceE |
| P42184 | nusa_ecoli | prsa_ecolx | nusA | prsA |
| P0AG82 | nusa_ecoli | psts_ecoli | nusA | pstS |
| P16919 | nusa_ecoli | rhsd_ecoli | nusA | rhsD |
| P0A7L0 | nusa_ecoli | rl1_ecoli  | nusA | rplA |
| P02413 | nusa_ecoli | rl15_ecoli | nusA | rplO |
| P02413 | nusa_ecoli | rl15_ecoli | nusA | rplO |
| P0ADY7 | nusa_ecoli | rl16_ecoli | nusA | rplP |
| P0A7K6 | nusa_ecoli | rl19_ecoli | nusA | rplS |
| P0A7K6 | nusa_ecoli | rl19_ecoli | nusA | rplS |
| P60422 | nusa_ecoli | rl2_ecoli  | nusA | rplB |
| P60422 | nusa_ecoli | rl2_ecoli  | nusA | rplB |
| P61175 | nusa_ecoli | rl22_ecoli | nusA | rplV |
| P61175 | nusa_ecoli | rl22_ecoli | nusA | rplV |
| P60624 | nusa_ecoli | rl24_ecoli | nusA | rplX |
| P60438 | nusa_ecoli | rl3_ecoli  | nusA | rplC |
| P60723 | nusa_ecoli | rl4_ecoli  | nusA | rplD |
| P62399 | nusa_ecoli | rl5_ecoli  | nusA | rplE |
| P0AG55 | nusa_ecoli | rl6_ecoli  | nusA | rplF |
| P0AGB3 | nusa_ecoli | rp32_ecoli | nusA | rpoH |
| P0A7Z4 | nusa_ecoli | rpoa_ecoli | nusA | rpoA |
| P0A7Z4 | nusa_ecoli | rpoa_ecoli | nusA | rpoA |
| P0A8V2 | nusa_ecoli | rpob_ecoli | nusA | rpoB |
| P0A8V2 | nusa_ecoli | rpob_ecoli | nusA | rpoB |
| P0A8V2 | nusa_ecoli | rpob_ecoli | nusA | rpoB |
| P0A8T7 | nusa_ecoli | rpoc_ecoli | nusA | rpoC |
| P0A8T7 | nusa_ecoli | rpoc_ecoli | nusA | rpoC |
| P0A8T7 | nusa_ecoli | rpoc_ecoli | nusA | rpoC |
| P00579 | nusa_ecoli | rpod_ecoli | nusA | rpoD |
| P0A800 | nusa_ecoli | rpoz_ecoli | nusA | rpoZ |
| P0A7V3 | nusa_ecoli | rs3_ecoli  | nusA | rpsC |
| P0A7V3 | nusa_ecoli | rs3_ecoli  | nusA | rpsC |
| P0A7V8 | nusa_ecoli | rs4_ecoli  | nusA | rpsD |
| P0A7V8 | nusa_ecoli | rs4_ecoli  | nusA | rpsD |
| P0A7W1 | nusa_ecoli | rs5_ecoli  | nusA | rpsE |
| P0A7W1 | nusa_ecoli | rs5_ecoli  | nusA | rpsE |
| P02359 | nusa_ecoli | rs7_ecoli  | nusA | rpsG |
| P02359 | nusa_ecoli | rs7_ecoli  | nusA | rpsG |
| P0A7X3 | nusa_ecoli | rs9_ecoli  | nusA | rpsI |
| P0AED0 | nusa_ecoli | uspa_ecoli | nusA | uspA |
| P0A698 | nusa_ecoli | uvra_ecoli | nusA | uvrA |
| P0AB43 | nusa_ecoli | ycgl_ecoli | nusA | ycgL |
| P06971 | nusb_ecoli | fhua_ecoli | nusB | fhuA |

|        |            |            |      |      |
|--------|------------|------------|------|------|
| P21517 | nusb_ecoli | malz_ecoli | nusB | malZ |
| P18843 | nusb_ecoli | nade_ecoli | nusB | nadE |
| P0AA10 | nusb_ecoli | rl13_ecoli | nusB | rpIM |
| P60438 | nusb_ecoli | rl3_ecoli  | nusB | rpIC |
| P0A7R5 | nusb_ecoli | rs10_ecoli | nusB | rpsJ |
| P0A7R5 | nusb_ecoli | rs10_ecoli | nusB | rpsJ |
| P0A7V0 | nusb_ecoli | rs2_ecoli  | nusB | rpsB |
| P0A7V8 | nusb_ecoli | rs4_ecoli  | nusB | rpsD |
| P0A7W1 | nusb_ecoli | rs5_ecoli  | nusB | rpsE |
| P0AG90 | nusb_ecoli | secd_ecoli | nusB | secD |
| P0AGC3 | nusb_ecoli | slt_ecoli  | nusB | slt  |
| P76463 | nusb_ecoli | yfaq_ecoli | nusB | yfaQ |
| P0A9P0 | odo1_ecoli | dldh_ecoli | sucA | lpdA |
| P0A9P0 | odo1_ecoli | dldh_ecoli | sucA | lpdA |
| P0ABC7 | odo1_ecoli | hflk_ecoli | sucA | hflK |
| P60716 | odo1_ecoli | lipa_ecoli | sucA | lipA |
| P0AFI0 | odo1_ecoli | oxc_ecoli  | sucA | oxc  |
| P76316 | odo2_ecoli | dcyd_ecoli | sucB | dcyD |
| P0A9P0 | odo2_ecoli | dldh_ecoli | sucB | lpdA |
| P0A9A6 | odo2_ecoli | ftsZ_ecoli | sucB | ftsZ |
| P0A9A9 | odo2_ecoli | fur_ecoli  | sucB | fur  |
| P60716 | odo2_ecoli | lipa_ecoli | sucB | lipA |
| P0A9X4 | odo2_ecoli | mreb_ecoli | sucB | mreB |
| P0AFL9 | odo2_ecoli | pqiA_ecoli | sucB | pqiA |
| P46850 | odo2_ecoli | rtcB_ecoli | sucB | rtcB |
| P77717 | odo2_ecoli | ybaY_ecoli | sucB | ybaY |
| P0AB43 | odo2_ecoli | ycgI_ecoli | sucB | ycgI |
| P08245 | odo2_ecoli | yciH_ecoli | sucB | yciH |
| P0AED9 | odp2_ecoli | dcm_ecoli  | aceF | dcm  |
| P0AC41 | odp2_ecoli | dhsA_ecoli | aceF | sdhA |
| P0A9P0 | odp2_ecoli | dldh_ecoli | aceF | lpdA |
| P22523 | odp2_ecoli | mukB_ecoli | aceF | mukB |
| P0A910 | ompa_ecoli | ompa_ecoli | ompA | ompA |
| P0A850 | ompa_ecoli | tig_ecoli  | ompA | tig  |
| Q47083 | ompr_ecoli | cbl_ecoli  | ompR | cbl  |
| P0AEJ4 | ompr_ecoli | envZ_ecoli | ompR | envZ |

|        |                            |                            |      |      |
|--------|----------------------------|----------------------------|------|------|
| P0A717 | <a href="#">ompr_ecoli</a> | <a href="#">kprs_ecoli</a> | ompR | prs  |
| P75949 | <a href="#">ompr_ecoli</a> | <a href="#">nagz_ecoli</a> | ompR | nagZ |
| P37651 | <a href="#">opda_ecoli</a> | <a href="#">gun_ecoli</a>  | prlC | bcsZ |
| P39369 | <a href="#">opda_ecoli</a> | <a href="#">yjhr_ecoli</a> | prlC | yjhr |
| P0A7V3 | <a href="#">opgg_ecoli</a> | <a href="#">rs3_ecoli</a>  | mdoG | rpsC |
| P0A7X3 | <a href="#">opgg_ecoli</a> | <a href="#">rs9_ecoli</a>  | mdoG | rpsI |
| P0A9P4 | <a href="#">opgg_ecoli</a> | <a href="#">trxb_ecoli</a> | mdoG | trxB |
| P39321 | <a href="#">opgg_ecoli</a> | <a href="#">ytfn_ecoli</a> | mdoG | ytfN |
| P00722 | <a href="#">osmc_ecoli</a> | <a href="#">bgal_ecoli</a> | osmC | lacZ |
| P32176 | <a href="#">osmc_ecoli</a> | <a href="#">fdog_ecoli</a> | osmC | fdoG |
| P0AEX9 | <a href="#">osmc_ecoli</a> | <a href="#">male_ecoli</a> | osmC | malE |
| P54746 | <a href="#">osmc_ecoli</a> | <a href="#">mngb_ecoli</a> | osmC | mngB |
| P05458 | <a href="#">osmc_ecoli</a> | <a href="#">ptrA_ecoli</a> | osmC | ptrA |
| P38684 | <a href="#">osmc_ecoli</a> | <a href="#">torr_ecoli</a> | osmC | torR |
| P0AD03 | <a href="#">osmc_ecoli</a> | <a href="#">yebS_ecoli</a> | osmC | yebS |
| P39277 | <a href="#">osmc_ecoli</a> | <a href="#">yjeH_ecoli</a> | osmC | yjeH |
| P0AEH8 | <a href="#">osmc_ecoli</a> | <a href="#">yjig_ecoli</a> | osmC | yjiG |
| P18843 | <a href="#">osmf_ecoli</a> | <a href="#">nade_ecoli</a> | osmF | nadE |
| P60723 | <a href="#">osmf_ecoli</a> | <a href="#">rl4_ecoli</a>  | osmF | rpID |
| P00722 | <a href="#">panc_ecoli</a> | <a href="#">bgal_ecoli</a> | panC | lacZ |
| P00968 | <a href="#">panc_ecoli</a> | <a href="#">carb_ecoli</a> | panC | carB |
| P0A6Y8 | <a href="#">panc_ecoli</a> | <a href="#">dnak_ecoli</a> | panC | dnaK |
| P31057 | <a href="#">panc_ecoli</a> | <a href="#">panb_ecoli</a> | panC | panB |
| P0A7D7 | <a href="#">panc_ecoli</a> | <a href="#">pur7_ecoli</a> | panC | purC |
| P0A9K9 | <a href="#">panc_ecoli</a> | <a href="#">slyd_ecoli</a> | panC | slyD |
| P07024 | <a href="#">panc_ecoli</a> | <a href="#">ushA_ecoli</a> | panC | ushA |
| P07024 | <a href="#">panc_ecoli</a> | <a href="#">ushA_ecoli</a> | panC | ushA |
| P0A9P0 | <a href="#">parc_ecoli</a> | <a href="#">dldh_ecoli</a> | parC | lpdA |
| P0AES4 | <a href="#">parc_ecoli</a> | <a href="#">gyra_ecoli</a> | parC | gyrA |

|          |                            |                            |      |      |
|----------|----------------------------|----------------------------|------|------|
| P0A9X4   | <a href="#">parc_ecoli</a> | <a href="#">mreb_ecoli</a> | parC | mreB |
| P11880   | <a href="#">parc_ecoli</a> | <a href="#">murf_ecoli</a> | parC | murF |
| P06959   | <a href="#">parc_ecoli</a> | <a href="#">odp2_ecoli</a> | parC | aceF |
| P32674   | <a href="#">parc_ecoli</a> | <a href="#">pflD_ecoli</a> | parC | pflD |
| P25742   | <a href="#">parc_ecoli</a> | <a href="#">rfaq_ecoli</a> | parC | rfaQ |
| P0A7L0   | <a href="#">parc_ecoli</a> | <a href="#">rl1_ecoli</a>  | parC | rplA |
| P0AA10   | <a href="#">parc_ecoli</a> | <a href="#">rl13_ecoli</a> | parC | rplM |
| P60422   | <a href="#">parc_ecoli</a> | <a href="#">rl2_ecoli</a>  | parC | rplB |
| P61175   | <a href="#">parc_ecoli</a> | <a href="#">rl22_ecoli</a> | parC | rplV |
| P0A7L8   | <a href="#">parc_ecoli</a> | <a href="#">rl27_ecoli</a> | parC | rpmA |
| P0A7N9   | <a href="#">parc_ecoli</a> | <a href="#">rl33_ecoli</a> | parC | rpmG |
| P0A7K2   | <a href="#">parc_ecoli</a> | <a href="#">rl7_ecoli</a>  | parC | rplL |
| P0A7R5   | <a href="#">parc_ecoli</a> | <a href="#">rs10_ecoli</a> | parC | rpsJ |
| P0A7V0   | <a href="#">parc_ecoli</a> | <a href="#">rs2_ecoli</a>  | parC | rpsB |
| P10408   | <a href="#">parc_ecoli</a> | <a href="#">seca_ecoli</a> | parC | secA |
| P0A9K9   | <a href="#">parc_ecoli</a> | <a href="#">slyd_ecoli</a> | parC | slyD |
| P08245   | <a href="#">parc_ecoli</a> | <a href="#">ycih_ecoli</a> | parC | yciH |
|          |                            |                            |      |      |
| P63883   | <a href="#">pbpb_ecoli</a> | <a href="#">amic_ecoli</a> | -    | amiC |
| P0AD68   | <a href="#">pbpb_ecoli</a> | <a href="#">ftsi_ecoli</a> | -    | ftsI |
| P29131   | <a href="#">pbpb_ecoli</a> | <a href="#">ftsn_ecoli</a> | mrcB | ftsN |
| P29131   | <a href="#">pbpb_ecoli</a> | <a href="#">ftsn_ecoli</a> | mrcB | ftsN |
| P29131   | <a href="#">pbpb_ecoli</a> | <a href="#">ftsn_ecoli</a> | mrcB | ftsN |
| P0A908   | <a href="#">pbpb_ecoli</a> | <a href="#">mipa_ecoli</a> | -    | mipA |
| P02918   | <a href="#">pbpb_ecoli</a> | <a href="#">pbpa_ecoli</a> | -    | mrcA |
| P02919-1 | <a href="#">pbpb_ecoli</a> | <a href="#">pbpb_ecoli</a> | -    | -    |
|          |                            |                            |      |      |
| P00722   | <a href="#">pcka_ecoli</a> | <a href="#">bgal_ecoli</a> | pckA | lacZ |
| P0A9F9   | <a href="#">pcka_ecoli</a> | <a href="#">metr_ecoli</a> | pckA | metR |
| P76272   | <a href="#">pcka_ecoli</a> | <a href="#">yebt_ecoli</a> | pckA | yebT |
|          |                            |                            |      |      |
| P0A6F5   | <a href="#">pdhr_ecoli</a> | <a href="#">ch60_ecoli</a> | pdhR | groL |
| P0A9P0   | <a href="#">pdhr_ecoli</a> | <a href="#">dldh_ecoli</a> | pdhR | lpdA |
| P0AFG8   | <a href="#">pdhr_ecoli</a> | <a href="#">odp1_ecoli</a> | pdhR | aceE |
| P06959   | <a href="#">pdhr_ecoli</a> | <a href="#">odp2_ecoli</a> | pdhR | aceF |
| P0A7M2   | <a href="#">pdhr_ecoli</a> | <a href="#">rl28_ecoli</a> | pdhR | rpmB |
| P0A843   | <a href="#">pdhr_ecoli</a> | <a href="#">tate_ecoli</a> | pdhR | tatE |
|          |                            |                            |      |      |
| P0A6Y8   | <a href="#">pdxk_ecoli</a> | <a href="#">dnak_ecoli</a> | pdxK | dnaK |
| P0AG44   | <a href="#">pdxk_ecoli</a> | <a href="#">rl17_ecoli</a> | pdxK | rplQ |

|        |                            |                             |      |      |
|--------|----------------------------|-----------------------------|------|------|
| P0A9C5 | <a href="#">pdxy_ecoli</a> | <a href="#">glna_ecoli</a>  | pdxY | glnA |
| Q47706 | <a href="#">pdxy_ecoli</a> | <a href="#">uidc_ecoli</a>  | pdxY | uidC |
| P0A6R0 | <a href="#">pepb_ecoli</a> | <a href="#">fabh_ecoli</a>  | pepB | fabH |
| P15038 | <a href="#">pepb_ecoli</a> | <a href="#">held_ecoli</a>  | pepB | held |
| P0A910 | <a href="#">pepb_ecoli</a> | <a href="#">ompa_ecoli</a>  | pepB | ompA |
| P15034 | <a href="#">pepd_ecoli</a> | <a href="#">ampp_ecoli</a>  | pepD | pepP |
| P15034 | <a href="#">pepd_ecoli</a> | <a href="#">ampp_ecoli</a>  | pepD | pepP |
| P0A6Y8 | <a href="#">pepd_ecoli</a> | <a href="#">dnak_ecoli</a>  | pepD | dnaK |
| P30128 | <a href="#">pepd_ecoli</a> | <a href="#">greb_ecoli</a>  | pepD | greB |
| P60560 | <a href="#">pepd_ecoli</a> | <a href="#">guac_ecoli</a>  | pepD | guaC |
| P15254 | <a href="#">pepd_ecoli</a> | <a href="#">pur4_ecoli</a>  | pepD | purL |
| P37750 | <a href="#">pepd_ecoli</a> | <a href="#">wbbj_ecoli</a>  | pepD | wbbJ |
| P32176 | <a href="#">pepq_ecoli</a> | <a href="#">fdog_ecoli</a>  | pepQ | fdoG |
| P21865 | <a href="#">pepq_ecoli</a> | <a href="#">kdpd_ecoli</a>  | pepQ | kdpD |
| P0ABT2 | <a href="#">pept_ecoli</a> | <a href="#">dps_ecoli</a>   | pepT | dps  |
| P0A6M8 | <a href="#">pept_ecoli</a> | <a href="#">efg_ecoli</a>   | pepT | fusA |
| P0CE47 | <a href="#">pept_ecoli</a> | <a href="#">eftu1_ecoli</a> | pepT | tufA |
| P0A9Z1 | <a href="#">pept_ecoli</a> | <a href="#">glnb_ecoli</a>  | pepT | glnB |
| P0ACF8 | <a href="#">pept_ecoli</a> | <a href="#">hns_ecoli</a>   | pepT | hns  |
| P18843 | <a href="#">pept_ecoli</a> | <a href="#">nade_ecoli</a>  | pepT | nadE |
| P0A7C6 | <a href="#">pept_ecoli</a> | <a href="#">pepe_ecoli</a>  | pepT | pepE |
| P09373 | <a href="#">pept_ecoli</a> | <a href="#">pflb_ecoli</a>  | pepT | pflB |
| P09373 | <a href="#">pept_ecoli</a> | <a href="#">pflb_ecoli</a>  | pepT | pflB |
| P09373 | <a href="#">pept_ecoli</a> | <a href="#">pflb_ecoli</a>  | pepT | pflB |
| P07004 | <a href="#">pept_ecoli</a> | <a href="#">proa_ecoli</a>  | pepT | proA |
| P16919 | <a href="#">pept_ecoli</a> | <a href="#">rhsd_ecoli</a>  | pepT | rhsD |
| P02413 | <a href="#">pept_ecoli</a> | <a href="#">rl15_ecoli</a>  | pepT | rpLO |
| P0A858 | <a href="#">pept_ecoli</a> | <a href="#">tpis_ecoli</a>  | pepT | tpiA |
| P71243 | <a href="#">pept_ecoli</a> | <a href="#">wcal_ecoli</a>  | pepT | wcaL |
| P0AD53 | <a href="#">pept_ecoli</a> | <a href="#">ygac_ecoli</a>  | pepT | ygaC |
| P0A8H6 | <a href="#">pept_ecoli</a> | <a href="#">yihl_ecoli</a>  | pepT | yihI |
| P77188 | <a href="#">pfla_ecoli</a> | <a href="#">matc_ecoli</a>  | pflA | matC |
| P18843 | <a href="#">pfla_ecoli</a> | <a href="#">nade_ecoli</a>  | pflA | nadE |
| P06971 | <a href="#">pflb_ecoli</a> | <a href="#">fhua_ecoli</a>  | pflB | fhua |
| P31574 | <a href="#">pflb_ecoli</a> | <a href="#">fixb_ecoli</a>  | pflB | fixB |
| P0AC53 | <a href="#">pflb_ecoli</a> | <a href="#">g6pd_ecoli</a>  | pflB | zwf  |
| P68066 | <a href="#">pflb_ecoli</a> | <a href="#">grca_ecoli</a>  | pflB | grcA |
| P68066 | <a href="#">pflb_ecoli</a> | <a href="#">grca_ecoli</a>  | pflB | grcA |
| P21599 | <a href="#">pflb_ecoli</a> | <a href="#">kpyk2_ecoli</a> | pflB | pykA |



|        |            |              |      |      |
|--------|------------|--------------|------|------|
| P77188 | pflb_ecoli | matc_ecoli   | pflB | matC |
| P18843 | pflb_ecoli | nade_ecoli   | pflB | nadE |
| Q8FBV2 | pflb_ecoli | tnaa_ecol6   | pflB | tnaA |
| P0A858 | pflb_ecoli | tpis_ecoli   | pflB | tpiA |
| P0A858 | pflb_ecoli | tpis_ecoli   | pflB | tpiA |
| P76154 | pflb_ecoli | ydfk_ecoli   | pflB | ydfK |
| P0A6Y8 | pgk_ecoli  | dnak_ecoli   | pgk  | dnak |
| P0A6P9 | pgk_ecoli  | eno_ecoli    | pgk  | eno  |
| P0A6X3 | pgk_ecoli  | hfq_ecoli    | pgk  | hfq  |
| P05055 | pgk_ecoli  | pnp_ecoli    | pgk  | pnp  |
| P0A7R1 | pgk_ecoli  | rl9_ecoli    | pgk  | rplI |
| P21513 | pgk_ecoli  | rne_ecoli    | pgk  | rne  |
| P0AG59 | pgk_ecoli  | rs14_ecoli   | pgk  | rpsN |
| P0A7U7 | pgk_ecoli  | rs20_ecoli   | pgk  | rpsT |
| P02358 | pgk_ecoli  | rs6_ecoli    | pgk  | rpsF |
| P18843 | pgm_ecoli  | nade_ecoli   | pgm  | nadE |
| P75977 | phnb_ecoli | ymfm_ecoli   | phnB | ymfM |
| P77239 | phol_ecoli | cusb_ecoli   | ybeZ | cusB |
| P00936 | phol_ecoli | cyaa_ecoli   | ybeZ | cyaA |
| P0ACF0 | phol_ecoli | dbha_ecoli   | ybeZ | hupA |
| P0A9P6 | phol_ecoli | dead_ecoli   | ybeZ | deaD |
| P0A9P0 | phol_ecoli | dldh_ecoli   | ybeZ | lpdA |
| P0A9P0 | phol_ecoli | dldh_ecoli   | ybeZ | lpdA |
| P0A6Q6 | phol_ecoli | fabz_ecoli   | ybeZ | fabZ |
| P0A9A9 | phol_ecoli | fur_ecoli    | ybeZ | fur  |
| P06993 | phol_ecoli | malt_ecoli   | ybeZ | malT |
| Q46877 | phol_ecoli | norv_ecoli   | ybeZ | norV |
| P0AFG8 | phol_ecoli | odp1_ecoli   | ybeZ | aceE |
| P06959 | phol_ecoli | odp2_ecoli   | ybeZ | aceF |
| P06959 | phol_ecoli | odp2_ecoli   | ybeZ | aceF |
| P23830 | phol_ecoli | pss_ecoli    | ybeZ | pssA |
| Q9F560 | phol_ecoli | q9f560_ecolx | ybeZ | ycfB |
| P0A7L0 | phol_ecoli | rl1_ecoli    | ybeZ | rplA |
| P0A7L0 | phol_ecoli | rl1_ecoli    | ybeZ | rplA |
| P0A7J3 | phol_ecoli | rl10_ecoli   | ybeZ | rplJ |
| P0AA10 | phol_ecoli | rl13_ecoli   | ybeZ | rplM |
| P0AA10 | phol_ecoli | rl13_ecoli   | ybeZ | rplM |

|        |            |            |      |      |
|--------|------------|------------|------|------|
| P02413 | phol_ecoli | rl15_ecoli | ybeZ | rpIO |
| P0ADY7 | phol_ecoli | rl16_ecoli | ybeZ | rpIP |
| P0A7K6 | phol_ecoli | rl19_ecoli | ybeZ | rpIS |
| P0A7K6 | phol_ecoli | rl19_ecoli | ybeZ | rpIS |
| P60422 | phol_ecoli | rl2_ecoli  | ybeZ | rpIB |
| P0A7L3 | phol_ecoli | rl20_ecoli | ybeZ | rpIT |
| P0AG48 | phol_ecoli | rl21_ecoli | ybeZ | rpIU |
| P61175 | phol_ecoli | rl22_ecoli | ybeZ | rpIV |
| P61175 | phol_ecoli | rl22_ecoli | ybeZ | rpIV |
| P60624 | phol_ecoli | rl24_ecoli | ybeZ | rpIX |
| P60624 | phol_ecoli | rl24_ecoli | ybeZ | rpIX |
| P68919 | phol_ecoli | rl25_ecoli | ybeZ | rpIY |
| P0A7M2 | phol_ecoli | rl28_ecoli | ybeZ | rpmB |
| P60438 | phol_ecoli | rl3_ecoli  | ybeZ | rpIC |
| P60438 | phol_ecoli | rl3_ecoli  | ybeZ | rpIC |
| P0A7N9 | phol_ecoli | rl33_ecoli | ybeZ | rpmG |
| P60723 | phol_ecoli | rl4_ecoli  | ybeZ | rpID |
| P60723 | phol_ecoli | rl4_ecoli  | ybeZ | rpID |
| P62399 | phol_ecoli | rl5_ecoli  | ybeZ | rpIE |
| P62399 | phol_ecoli | rl5_ecoli  | ybeZ | rpIE |
| P0AG55 | phol_ecoli | rl6_ecoli  | ybeZ | rpIF |
| P0AG55 | phol_ecoli | rl6_ecoli  | ybeZ | rpIF |
| P0A7K2 | phol_ecoli | rl7_ecoli  | ybeZ | rpIL |
| P0A7R1 | phol_ecoli | rl9_ecoli  | ybeZ | rpII |
| P0A7R1 | phol_ecoli | rl9_ecoli  | ybeZ | rpII |
| P75864 | phol_ecoli | rlml_ecoli | ybeZ | rlmL |
| P37765 | phol_ecoli | rlub_ecoli | ybeZ | rluB |
| P21499 | phol_ecoli | rnr_ecoli  | ybeZ | rnr  |
| P0AG67 | phol_ecoli | rs1_ecoli  | ybeZ | rpsA |
| P0A7S9 | phol_ecoli | rs13_ecoli | ybeZ | rpsM |
| P0AG59 | phol_ecoli | rs14_ecoli | ybeZ | rpsN |
| P0A7T3 | phol_ecoli | rs16_ecoli | ybeZ | rpsP |
| P0A7V0 | phol_ecoli | rs2_ecoli  | ybeZ | rpsB |
| P0A7V0 | phol_ecoli | rs2_ecoli  | ybeZ | rpsB |
| P0A7U7 | phol_ecoli | rs20_ecoli | ybeZ | rpsT |
| P0A7V3 | phol_ecoli | rs3_ecoli  | ybeZ | rpsC |
| P0A7V8 | phol_ecoli | rs4_ecoli  | ybeZ | rpsD |
| P0A7W1 | phol_ecoli | rs5_ecoli  | ybeZ | rpsE |
| P0A7W1 | phol_ecoli | rs5_ecoli  | ybeZ | rpsE |
| P02359 | phol_ecoli | rs7_ecoli  | ybeZ | rpsG |
| P02359 | phol_ecoli | rs7_ecoli  | ybeZ | rpsG |
| P10408 | phol_ecoli | seca_ecoli | ybeZ | secA |
| P03018 | phol_ecoli | uvrd_ecoli | ybeZ | uvrD |
| P0AAS7 | phol_ecoli | ybcj_ecoli | ybeZ | ybcJ |
| P39199 | phol_ecoli | yfcb_ecoli | ybeZ | yfcB |

|        |                             |                            |      |      |
|--------|-----------------------------|----------------------------|------|------|
| P0AGJ5 | <a href="#">phol_ecoli</a>  | <a href="#">yfif_ecoli</a> | ybeZ | yfiF |
| P0AGK4 | <a href="#">phol_ecoli</a>  | <a href="#">yhby_ecoli</a> | ybeZ | yhby |
| P0AAI3 | <a href="#">phop_ecoli</a>  | <a href="#">ftsh_ecoli</a> | phoP | ftsH |
| P18843 | <a href="#">phop_ecoli</a>  | <a href="#">nade_ecoli</a> | phoP | nadE |
| P0AG55 | <a href="#">phop_ecoli</a>  | <a href="#">rl6_ecoli</a>  | phoP | rpIF |
| P32167 | <a href="#">phop_ecoli</a>  | <a href="#">yiix_ecoli</a> | phoP | yiiX |
| P0ACF0 | <a href="#">phsm_ecoli</a>  | <a href="#">dbha_ecoli</a> | malP | hupA |
| P0A9P0 | <a href="#">phsm_ecoli</a>  | <a href="#">dldh_ecoli</a> | malP | lpdA |
| P0A9P0 | <a href="#">phsm_ecoli</a>  | <a href="#">dldh_ecoli</a> | malP | lpdA |
| P06959 | <a href="#">phsm_ecoli</a>  | <a href="#">odp2_ecoli</a> | malP | aceF |
| P06959 | <a href="#">phsm_ecoli</a>  | <a href="#">odp2_ecoli</a> | malP | aceF |
| P05055 | <a href="#">phsm_ecoli</a>  | <a href="#">pnp_ecoli</a>  | malP | pnp  |
| P0A7L0 | <a href="#">phsm_ecoli</a>  | <a href="#">rl1_ecoli</a>  | malP | rplA |
| P0AA10 | <a href="#">phsm_ecoli</a>  | <a href="#">rl13_ecoli</a> | malP | rplM |
| P0A7K6 | <a href="#">phsm_ecoli</a>  | <a href="#">rl19_ecoli</a> | malP | rplS |
| P0AG48 | <a href="#">phsm_ecoli</a>  | <a href="#">rl21_ecoli</a> | malP | rplU |
| P61175 | <a href="#">phsm_ecoli</a>  | <a href="#">rl22_ecoli</a> | malP | rplV |
| P60438 | <a href="#">phsm_ecoli</a>  | <a href="#">rl3_ecoli</a>  | malP | rplC |
| P60438 | <a href="#">phsm_ecoli</a>  | <a href="#">rl3_ecoli</a>  | malP | rplC |
| P60723 | <a href="#">phsm_ecoli</a>  | <a href="#">rl4_ecoli</a>  | malP | rplD |
| P0A7R1 | <a href="#">phsm_ecoli</a>  | <a href="#">rl9_ecoli</a>  | malP | rplI |
| P0AGK4 | <a href="#">phsm_ecoli</a>  | <a href="#">yhby_ecoli</a> | malP | yhby |
| P77674 | <a href="#">phyda_ecoli</a> | <a href="#">abdh_ecoli</a> | hyuA | ydcW |
| P0A6F5 | <a href="#">phyda_ecoli</a> | <a href="#">ch60_ecoli</a> | hyuA | groL |
| P0A6F5 | <a href="#">pmba_ecoli</a>  | <a href="#">ch60_ecoli</a> | pmbA | groL |
| P39343 | <a href="#">pmba_ecoli</a>  | <a href="#">idnr_ecoli</a> | pmbA | idnR |
| P04391 | <a href="#">pmba_ecoli</a>  | <a href="#">otc1_ecoli</a> | pmbA | argI |
| P06960 | <a href="#">pmba_ecoli</a>  | <a href="#">otc2_ecoli</a> | pmbA | argF |
| P39389 | <a href="#">pmba_ecoli</a>  | <a href="#">yjir_ecoli</a> | pmbA | yjiR |
| P31678 | <a href="#">pmrd_ecoli</a>  | <a href="#">otsb_ecoli</a> | pmrD | otsB |
| P15288 | <a href="#">pmrd_ecoli</a>  | <a href="#">pepd_ecoli</a> | pmrD | pepD |
| P0AG44 | <a href="#">pmrd_ecoli</a>  | <a href="#">rl17_ecoli</a> | pmrD | rplQ |
| P60422 | <a href="#">pmrd_ecoli</a>  | <a href="#">rl2_ecoli</a>  | pmrD | rplB |
| P0A7U3 | <a href="#">pmrd_ecoli</a>  | <a href="#">rs19_ecoli</a> | pmrD | rpsS |
| P0A7X3 | <a href="#">pmrd_ecoli</a>  | <a href="#">rs9_ecoli</a>  | pmrD | rpsI |
| P75694 | <a href="#">pmrd_ecoli</a>  | <a href="#">yaho_ecoli</a> | pmrD | yahO |
| P76321 | <a href="#">pmrd_ecoli</a>  | <a href="#">yedn_ecoli</a> | pmrD | yedN |
| P0ACF0 | <a href="#">pnp_ecoli</a>   | <a href="#">dbha_ecoli</a> | pnp  | hupA |
| P0A6P9 | <a href="#">pnp_ecoli</a>   | <a href="#">eno_ecoli</a>  | pnp  | eno  |

|        |           |            |     |      |
|--------|-----------|------------|-----|------|
| P0A6P9 | pnp_ecoli | eno_ecoli  | pnp | eno  |
| P0A817 | pnp_ecoli | metk_ecoli | pnp | metK |
| P0A9X4 | pnp_ecoli | mreb_ecoli | pnp | mreB |
| P0A799 | pnp_ecoli | pgk_ecoli  | pnp | pgk  |
| P0A7G6 | pnp_ecoli | reca_ecoli | pnp | recA |
| P0A8J8 | pnp_ecoli | rhlb_ecoli | pnp | rhlB |
| P0A8J8 | pnp_ecoli | rhlb_ecoli | pnp | rhlB |
| P0A7L0 | pnp_ecoli | rl1_ecoli  | pnp | rplA |
| P0AA10 | pnp_ecoli | rl13_ecoli | pnp | rplM |
| P0AA10 | pnp_ecoli | rl13_ecoli | pnp | rplM |
| P02413 | pnp_ecoli | rl15_ecoli | pnp | rplO |
| P0AG44 | pnp_ecoli | rl17_ecoli | pnp | rplQ |
| P60422 | pnp_ecoli | rl2_ecoli  | pnp | rplB |
| P0AG48 | pnp_ecoli | rl21_ecoli | pnp | rplU |
| P61175 | pnp_ecoli | rl22_ecoli | pnp | rplV |
| P60624 | pnp_ecoli | rl24_ecoli | pnp | rplX |
| P60723 | pnp_ecoli | rl4_ecoli  | pnp | rplD |
| P60723 | pnp_ecoli | rl4_ecoli  | pnp | rplD |
| P62399 | pnp_ecoli | rl5_ecoli  | pnp | rplE |
| P0AG55 | pnp_ecoli | rl6_ecoli  | pnp | rplF |
| P0A7R1 | pnp_ecoli | rl9_ecoli  | pnp | rplI |
| P0A7R1 | pnp_ecoli | rl9_ecoli  | pnp | rplI |
| P37765 | pnp_ecoli | rlub_ecoli | pnp | rluB |
| P21513 | pnp_ecoli | rne_ecoli  | pnp | rne  |
| P21513 | pnp_ecoli | rne_ecoli  | pnp | rne  |
| P21513 | pnp_ecoli | rne_ecoli  | pnp | rne  |
| P0A7Z4 | pnp_ecoli | rpoa_ecoli | pnp | rpoA |
| P0A7S9 | pnp_ecoli | rs13_ecoli | pnp | rpsM |
| P0A7S9 | pnp_ecoli | rs13_ecoli | pnp | rpsM |
| P0ADZ4 | pnp_ecoli | rs15_ecoli | pnp | rpsO |
| P0A7T7 | pnp_ecoli | rs18_ecoli | pnp | rpsR |
| P0A7U3 | pnp_ecoli | rs19_ecoli | pnp | rpsS |
| P0A7U7 | pnp_ecoli | rs20_ecoli | pnp | rpsT |
| P0A7V3 | pnp_ecoli | rs3_ecoli  | pnp | rpsC |
| P0A7V8 | pnp_ecoli | rs4_ecoli  | pnp | rpsD |
| P0A7W1 | pnp_ecoli | rs5_ecoli  | pnp | rpsE |
| P0A7W1 | pnp_ecoli | rs5_ecoli  | pnp | rpsE |
| P02359 | pnp_ecoli | rs7_ecoli  | pnp | rpsG |
| P02359 | pnp_ecoli | rs7_ecoli  | pnp | rpsG |
| P21507 | pnp_ecoli | srmB_ecoli | pnp | srmB |

|        |            |            |      |      |
|--------|------------|------------|------|------|
| P24182 | ppib_ecoli | accC_ecoli | ppiB | accC |
| P00722 | ppib_ecoli | bgal_ecoli | ppiB | lacZ |
| P0A6H1 | ppib_ecoli | clpx_ecoli | ppiB | clpX |
| P0A6J5 | ppib_ecoli | dada_ecoli | ppiB | dadA |
| P0A6Y8 | ppib_ecoli | dnak_ecoli | ppiB | dnaK |
| P0AAI3 | ppib_ecoli | ftsh_ecoli | ppiB | ftsH |
| P11553 | ppib_ecoli | fuck_ecoli | ppiB | fuck |
| P13035 | ppib_ecoli | glpD_ecoli | ppiB | glpD |
| P0ABC7 | ppib_ecoli | hflk_ecoli | ppiB | hflK |
| P22523 | ppib_ecoli | mukb_ecoli | ppiB | mukB |
| P09373 | ppib_ecoli | pflb_ecoli | ppiB | pflB |
| P0A9M8 | ppib_ecoli | pta_ecoli  | ppiB | pta  |
| P09546 | ppib_ecoli | puta_ecoli | ppiB | putA |
| P16918 | ppib_ecoli | rhsc_ecoli | ppiB | rhsC |
| P0ADY3 | ppib_ecoli | rl14_ecoli | ppiB | rplN |
| P0A8V2 | ppib_ecoli | rpob_ecoli | ppiB | rpoB |
| P75817 | ppib_ecoli | rumb_ecoli | ppiB | rumB |
| P76108 | ppib_ecoli | ydcS_ecoli | ppiB | ydcS |
| P0A8W8 | ppib_ecoli | yfbu_ecoli | ppiB | yfbU |
| P37659 | ppib_ecoli | yhju_ecoli | ppiB | yhjU |
| P0ADN2 | ppib_ecoli | yife_ecoli | ppiB | yifE |
|        |            |            |      |      |
| P0ABE7 | ppk_ecoli  | c562_ecolx | ppk  | cybC |
| P0A6F5 | ppk_ecoli  | ch60_ecoli | ppk  | groL |
| P0AC41 | ppk_ecoli  | dhsa_ecoli | ppk  | sdhA |
| P0A9P0 | ppk_ecoli  | dldh_ecoli | ppk  | lpdA |
| P06959 | ppk_ecoli  | odp2_ecoli | ppk  | aceF |
| P64574 | ppk_ecoli  | yghw_ecoli | ppk  | yghW |
| P0ADK8 | ppk_ecoli  | yibl_ecoli | ppk  | yibL |
|        |            |            |      |      |
| P60422 | ppsa_ecoli | rl2_ecoli  | ppsA | rplB |
|        |            |            |      |      |
| P0A7L0 | pric_ecoli | rl1_ecoli  | priC | rplA |
| P60422 | pric_ecoli | rl2_ecoli  | priC | rplB |
| P60438 | pric_ecoli | rl3_ecoli  | priC | rplC |
| P0AG55 | pric_ecoli | rl6_ecoli  | priC | rplF |
| P0AG67 | pric_ecoli | rs1_ecoli  | priC | rpsA |
| P0A7V8 | pric_ecoli | rs4_ecoli  | priC | rpsD |
| P02359 | pric_ecoli | rs7_ecoli  | priC | rpsG |
| P00959 | pric_ecoli | sym_ecoli  | priC | metG |
| P0ADE4 | pric_ecoli | ytfm_ecoli | priC | ytfM |
|        |            |            |      |      |
| P0A6F5 | prpd_ecoli | ch60_ecoli | prpD | groL |

|        |                            |                             |      |      |
|--------|----------------------------|-----------------------------|------|------|
| P18843 | <a href="#">prpd_ecoli</a> | <a href="#">nade_ecoli</a>  | prpD | nadE |
| P33940 | <a href="#">pspf_ecoli</a> | <a href="#">mqo_ecoli</a>   | pspF | mqo  |
| P45548 | <a href="#">pspf_ecoli</a> | <a href="#">php_ecoli</a>   | pspF | php  |
| P05055 | <a href="#">pss_ecoli</a>  | <a href="#">pnp_ecoli</a>   | pssA | pnp  |
| P0ADY1 | <a href="#">pss_ecoli</a>  | <a href="#">ppid_ecoli</a>  | pssA | ppiD |
| P0AFL6 | <a href="#">pss_ecoli</a>  | <a href="#">ppx_ecoli</a>   | pssA | ppx  |
| P0A7L0 | <a href="#">pss_ecoli</a>  | <a href="#">rl1_ecoli</a>   | pssA | rplA |
| P0AG44 | <a href="#">pss_ecoli</a>  | <a href="#">rl17_ecoli</a>  | pssA | rplQ |
| P60422 | <a href="#">pss_ecoli</a>  | <a href="#">rl2_ecoli</a>   | pssA | rplB |
| P0AG48 | <a href="#">pss_ecoli</a>  | <a href="#">rl21_ecoli</a>  | pssA | rplU |
| P0ADZ0 | <a href="#">pss_ecoli</a>  | <a href="#">rl23_ecoli</a>  | pssA | rplW |
| P60438 | <a href="#">pss_ecoli</a>  | <a href="#">rl3_ecoli</a>   | pssA | rplC |
| P0A7K2 | <a href="#">pss_ecoli</a>  | <a href="#">rl7_ecoli</a>   | pssA | rplL |
| P75864 | <a href="#">pss_ecoli</a>  | <a href="#">rlml_ecoli</a>  | pssA | rlmL |
| P0AG67 | <a href="#">pss_ecoli</a>  | <a href="#">rs1_ecoli</a>   | pssA | rpsA |
| P0A7S9 | <a href="#">pss_ecoli</a>  | <a href="#">rs13_ecoli</a>  | pssA | rpsM |
| P0AG59 | <a href="#">pss_ecoli</a>  | <a href="#">rs14_ecoli</a>  | pssA | rpsN |
| P0A7V0 | <a href="#">pss_ecoli</a>  | <a href="#">rs2_ecoli</a>   | pssA | rpsB |
| P68679 | <a href="#">pss_ecoli</a>  | <a href="#">rs21_ecoli</a>  | pssA | rpsU |
| P0A7V3 | <a href="#">pss_ecoli</a>  | <a href="#">rs3_ecoli</a>   | pssA | rpsC |
| P0A7V8 | <a href="#">pss_ecoli</a>  | <a href="#">rs4_ecoli</a>   | pssA | rpsD |
| P0A7V8 | <a href="#">pss_ecoli</a>  | <a href="#">rs4_ecoli</a>   | pssA | rpsD |
| P0A7W1 | <a href="#">pss_ecoli</a>  | <a href="#">rs5_ecoli</a>   | pssA | rpsE |
| P02359 | <a href="#">pss_ecoli</a>  | <a href="#">rs7_ecoli</a>   | pssA | rpsG |
| P0AGJ5 | <a href="#">pss_ecoli</a>  | <a href="#">yfif_ecoli</a>  | pssA | yfiF |
| P64574 | <a href="#">pss_ecoli</a>  | <a href="#">yghw_ecoli</a>  | pssA | yghW |
| P08622 | <a href="#">pt1_ecoli</a>  | <a href="#">dnaj_ecoli</a>  | ptsl | dnaJ |
| P0AEJ2 | <a href="#">pt1_ecoli</a>  | <a href="#">entc_ecoli</a>  | ptsl | entC |
| P10121 | <a href="#">pt1_ecoli</a>  | <a href="#">ftsy_ecoli</a>  | ptsl | ftsY |
| P18843 | <a href="#">pt1_ecoli</a>  | <a href="#">nade_ecoli</a>  | ptsl | nadE |
| P0ACP7 | <a href="#">pt1_ecoli</a>  | <a href="#">purr_ecoli</a>  | ptsl | purR |
| P0A6E4 | <a href="#">pta_ecoli</a>  | <a href="#">assy_ecoli</a>  | pta  | argG |
| P08365 | <a href="#">pta_ecoli</a>  | <a href="#">chps_ecoli</a>  | pta  | chpS |
| P08622 | <a href="#">pta_ecoli</a>  | <a href="#">dnaj_ecoli</a>  | pta  | dnaJ |
| P0CE47 | <a href="#">pta_ecoli</a>  | <a href="#">eftu1_ecoli</a> | pta  | tufA |
| P0ACC7 | <a href="#">pta_ecoli</a>  | <a href="#">glmu_ecoli</a>  | pta  | glmU |
| P18843 | <a href="#">pta_ecoli</a>  | <a href="#">nade_ecoli</a>  | pta  | nadE |
| P0ABL5 | <a href="#">pta_ecoli</a>  | <a href="#">napc_ecoli</a>  | pta  | napC |
| P0A772 | <a href="#">pta_ecoli</a>  | <a href="#">nrld_ecoli</a>  | pta  | nrld |
| P0AFD1 | <a href="#">pta_ecoli</a>  | <a href="#">nuoe_ecoli</a>  | pta  | nuoE |
| P09546 | <a href="#">pta_ecoli</a>  | <a href="#">puta_ecoli</a>  | pta  | putA |

|        |           |            |     |      |
|--------|-----------|------------|-----|------|
| P65870 | pta_ecoli | qued_ecoli | pta | queD |
| P16918 | pta_ecoli | rhsc_ecoli | pta | rhcC |
| P0AG55 | pta_ecoli | rl6_ecoli  | pta | rplF |
| P0A850 | pta_ecoli | tig_ecoli  | pta | tig  |
| P31827 | pta_ecoli | yddb_ecoli | pta | yddB |
| P76150 | pta_ecoli | ynek_ecoli | pta | yneK |

|        |            |             |     |      |
|--------|------------|-------------|-----|------|
| P69786 | ptga_ecoli | ptgcb_ecoli | crr | ptsG |
| P0AA04 | ptga_ecoli | pthp_ecoli  | crr | ptsH |

|        |            |            |      |      |
|--------|------------|------------|------|------|
| P77398 | ptha_ecoli | arna_ecoli | srlB | arnA |
| P0AES0 | ptha_ecoli | gsp_ecoli  | srlB | gsp  |
| P76104 | ptha_ecoli | ydcP_ecoli | srlB | ydcP |

|        |            |           |      |      |
|--------|------------|-----------|------|------|
| P08839 | pthp_ecoli | pt1_ecoli | ptsH | ptsl |
|--------|------------|-----------|------|------|

|        |            |             |      |      |
|--------|------------|-------------|------|------|
| P06961 | ptkb_ecoli | cca_ecoli   | gatB | cca  |
| P0CE47 | ptkb_ecoli | eftu1_ecoli | gatB | tufA |
| P76092 | ptkb_ecoli | ynbc_ecoli  | gatB | ynbC |

|        |             |            |      |      |
|--------|-------------|------------|------|------|
| P0ACN7 | ptnab_ecoli | cytr_ecoli | manX | cytR |
| P0A799 | ptnab_ecoli | pgk_ecoli  | manX | pgk  |
| P69801 | ptnab_ecoli | ptnc_ecoli | manX | manY |
| P69805 | ptnab_ecoli | ptnd_ecoli | manX | manZ |
| P24230 | ptnab_ecoli | recg_ecoli | manX | recG |
| P61175 | ptnab_ecoli | rl22_ecoli | manX | rplV |
| P0A7M2 | ptnab_ecoli | rl28_ecoli | manX | rpmB |
| P30864 | ptnab_ecoli | yafc_ecoli | manX | yafC |

|        |            |            |      |      |
|--------|------------|------------|------|------|
| P0AAN1 | ptsn_ecoli | hybe_ecoli | ptsN | hybE |
|--------|------------|------------|------|------|

|        |            |            |      |      |
|--------|------------|------------|------|------|
| P06961 | pur7_ecoli | cca_ecoli  | purC | cca  |
| P0A6Y8 | pur7_ecoli | dnak_ecoli | purC | dnaK |
| P0A6Y8 | pur7_ecoli | dnak_ecoli | purC | dnaK |
| P0ACZ4 | pur7_ecoli | evga_ecoli | purC | evgA |
| P60560 | pur7_ecoli | guac_ecoli | purC | guaC |
| P30015 | pur7_ecoli | lhr_ecoli  | purC | lhr  |

|        |                            |                             |      |      |
|--------|----------------------------|-----------------------------|------|------|
| P0A850 | <a href="#">pur7_ecoli</a> | <a href="#">tig_ecoli</a>   | purC | tig  |
| P0A850 | <a href="#">pur7_ecoli</a> | <a href="#">tig_ecoli</a>   | purC | tig  |
| P31463 | <a href="#">pur7_ecoli</a> | <a href="#">yidz_ecoli</a>  | purC | yidZ |
| P38104 | <a href="#">pura_ecoli</a> | <a href="#">rspa_ecoli</a>  | purA | rspA |
| P0A6F5 | <a href="#">puta_ecoli</a> | <a href="#">ch60_ecoli</a>  | putA | groL |
| P0A6Y8 | <a href="#">puta_ecoli</a> | <a href="#">dnak_ecoli</a>  | putA | dnaK |
| P0ABF4 | <a href="#">puta_ecoli</a> | <a href="#">eutm_ecoli</a>  | putA | eutM |
| P60293 | <a href="#">puta_ecoli</a> | <a href="#">mukf_ecoli</a>  | putA | mukF |
| P33230 | <a href="#">puta_ecoli</a> | <a href="#">ydac_ecoli</a>  | putA | ydaC |
| P76464 | <a href="#">puta_ecoli</a> | <a href="#">yfas_ecoli</a>  | putA | yfaS |
| P63389 | <a href="#">puta_ecoli</a> | <a href="#">yhes_ecoli</a>  | putA | yheS |
| P31658 | <a href="#">pyrg_ecoli</a> | <a href="#">hcha_ecoli</a>  | pyrG | hchA |
| P18843 | <a href="#">pyrg_ecoli</a> | <a href="#">nade_ecoli</a>  | pyrG | nadE |
| P0A8V2 | <a href="#">pyrg_ecoli</a> | <a href="#">rpob_ecoli</a>  | pyrG | rpoB |
| P0A8T7 | <a href="#">pyrg_ecoli</a> | <a href="#">rpoc_ecoli</a>  | pyrG | rpoC |
| P08956 | <a href="#">pyrg_ecoli</a> | <a href="#">t1rk_ecoli</a>  | pyrG | hsdR |
| P75736 | <a href="#">pyrg_ecoli</a> | <a href="#">ybff_ecoli</a>  | pyrG | ybfF |
| P0A6Y8 | <a href="#">qor1_ecoli</a> | <a href="#">dnak_ecoli</a>  | qorA | dnaK |
| P36767 | <a href="#">qor1_ecoli</a> | <a href="#">rdgc_ecoli</a>  | qorA | rdgC |
| P33224 | <a href="#">quec_ecoli</a> | <a href="#">aidb_ecoli</a>  | queC | aidB |
| P00722 | <a href="#">quec_ecoli</a> | <a href="#">bgal_ecoli</a>  | queC | lacZ |
| P0A6Y8 | <a href="#">quec_ecoli</a> | <a href="#">dnak_ecoli</a>  | queC | dnaK |
| P0A6Y8 | <a href="#">quec_ecoli</a> | <a href="#">dnak_ecoli</a>  | queC | dnaK |
| P0CE47 | <a href="#">quec_ecoli</a> | <a href="#">eftu1_ecoli</a> | queC | tufA |
| P0CE47 | <a href="#">quec_ecoli</a> | <a href="#">eftu1_ecoli</a> | queC | tufA |
| P13035 | <a href="#">quec_ecoli</a> | <a href="#">glpd_ecoli</a>  | queC | glpD |
| P68066 | <a href="#">quec_ecoli</a> | <a href="#">grca_ecoli</a>  | queC | grcA |
| P0A6B7 | <a href="#">quec_ecoli</a> | <a href="#">iscs_ecoli</a>  | queC | iscS |
| P22523 | <a href="#">quec_ecoli</a> | <a href="#">mukb_ecoli</a>  | queC | mukB |
| P0A9I5 | <a href="#">quec_ecoli</a> | <a href="#">napd_ecoli</a>  | queC | napD |
| P19319 | <a href="#">quec_ecoli</a> | <a href="#">narz_ecoli</a>  | queC | narZ |
| P0A7K2 | <a href="#">quec_ecoli</a> | <a href="#">rl7_ecoli</a>   | queC | rpIL |
| P0A7R5 | <a href="#">quec_ecoli</a> | <a href="#">rs10_ecoli</a>  | queC | rpsJ |
| P0AG24 | <a href="#">quec_ecoli</a> | <a href="#">spot_ecoli</a>  | queC | spoT |
| P76417 | <a href="#">quec_ecoli</a> | <a href="#">yegt_ecoli</a>  | queC | yegT |



|        |                            |                             |      |      |
|--------|----------------------------|-----------------------------|------|------|
| Q47153 | <a href="#">rapa_ecoli</a> | <a href="#">fhia_ecoli</a>  | rapA | fhiA |
| P0AFF6 | <a href="#">rapa_ecoli</a> | <a href="#">nusa_ecoli</a>  | rapA | nusA |
| P60438 | <a href="#">rapa_ecoli</a> | <a href="#">rl3_ecoli</a>   | rapA | rpIC |
| P0A7Z4 | <a href="#">rapa_ecoli</a> | <a href="#">rpoa_ecoli</a>  | rapA | rpoA |
| P0A8V2 | <a href="#">rapa_ecoli</a> | <a href="#">rpob_ecoli</a>  | rapA | rpoB |
| P0A8T7 | <a href="#">rapa_ecoli</a> | <a href="#">rpoc_ecoli</a>  | rapA | rpoC |
| P0A8T7 | <a href="#">rapa_ecoli</a> | <a href="#">rpoc_ecoli</a>  | rapA | rpoC |
| P0A7W1 | <a href="#">rapa_ecoli</a> | <a href="#">rs5_ecoli</a>   | rapA | rpsE |
| P76464 | <a href="#">rapa_ecoli</a> | <a href="#">yfas_ecoli</a>  | rapA | yfaS |
| P77196 | <a href="#">rapa_ecoli</a> | <a href="#">yfcu_ecoli</a>  | rapA | yfcU |
| P18843 | <a href="#">rbfa_ecoli</a> | <a href="#">nade_ecoli</a>  | rbfA | nadE |
|        |                            |                             |      |      |
| P0A6Y8 | <a href="#">rbsb_ecoli</a> | <a href="#">dnak_ecoli</a>  | rbsB | dnaK |
| P22731 | <a href="#">rbsb_ecoli</a> | <a href="#">livf_ecoli</a>  | rbsB | livF |
| P18843 | <a href="#">rbsb_ecoli</a> | <a href="#">nade_ecoli</a>  | rbsB | nadE |
| P16684 | <a href="#">rbsb_ecoli</a> | <a href="#">phnf_ecoli</a>  | rbsB | phnF |
| P60723 | <a href="#">rbsb_ecoli</a> | <a href="#">rl4_ecoli</a>   | rbsB | rpID |
|        |                            |                             |      |      |
| P0AA16 | <a href="#">rbsk_ecoli</a> | <a href="#">ompr_ecoli</a>  | rbsK | ompR |
|        |                            |                             |      |      |
| P0ABB8 | <a href="#">rcsb_ecoli</a> | <a href="#">atma_ecoli</a>  | rcsB | mgtA |
| P77808 | <a href="#">rcsb_ecoli</a> | <a href="#">cinal_ecoli</a> | rcsB | yfaY |
| P0ACJ8 | <a href="#">rcsb_ecoli</a> | <a href="#">crp_ecoli</a>   | rcsB | crp  |
| P0A6Y8 | <a href="#">rcsb_ecoli</a> | <a href="#">dnak_ecoli</a>  | rcsB | dnaK |
| P00582 | <a href="#">rcsb_ecoli</a> | <a href="#">dpo1_ecoli</a>  | rcsB | polA |
| P0CE47 | <a href="#">rcsb_ecoli</a> | <a href="#">eftu1_ecoli</a> | rcsB | tufA |
| P38134 | <a href="#">rcsb_ecoli</a> | <a href="#">etk_ecoli</a>   | rcsB | etk  |
| P63204 | <a href="#">rcsb_ecoli</a> | <a href="#">gade_ecoli</a>  | rcsB | gadE |
| P75882 | <a href="#">rcsb_ecoli</a> | <a href="#">gfcD_ecoli</a>  | rcsB | gfcD |
| P0A9Z1 | <a href="#">rcsb_ecoli</a> | <a href="#">glnb_ecoli</a>  | rcsB | glnB |
| P33231 | <a href="#">rcsb_ecoli</a> | <a href="#">lldp_ecoli</a>  | rcsB | lldP |
| P0A8T1 | <a href="#">rcsb_ecoli</a> | <a href="#">prma_ecoli</a>  | rcsB | prmA |
| P39838 | <a href="#">rcsb_ecoli</a> | <a href="#">rcsd_ecoli</a>  | rcsB | rcsD |
| P77215 | <a href="#">rcsb_ecoli</a> | <a href="#">rhmd_ecoli</a>  | rcsB | rhmd |
| P0AA10 | <a href="#">rcsb_ecoli</a> | <a href="#">rl13_ecoli</a>  | rcsB | rpIM |
| P0AA10 | <a href="#">rcsb_ecoli</a> | <a href="#">rl13_ecoli</a>  | rcsB | rpIM |
| P0A7K6 | <a href="#">rcsb_ecoli</a> | <a href="#">rl19_ecoli</a>  | rcsB | rpIS |
| P61175 | <a href="#">rcsb_ecoli</a> | <a href="#">rl22_ecoli</a>  | rcsB | rpIV |
| P0A7M2 | <a href="#">rcsb_ecoli</a> | <a href="#">rl28_ecoli</a>  | rcsB | rpmB |
| P60438 | <a href="#">rcsb_ecoli</a> | <a href="#">rl3_ecoli</a>   | rcsB | rpIC |
| P62399 | <a href="#">rcsb_ecoli</a> | <a href="#">rl5_ecoli</a>   | rcsB | rpIE |

|        |                            |                             |      |      |
|--------|----------------------------|-----------------------------|------|------|
| P0A7R1 | <a href="#">rcsb_ecoli</a> | <a href="#">rl9_ecoli</a>   | rcsB | rplI |
| P0A7Z4 | <a href="#">rcsb_ecoli</a> | <a href="#">rpoa_ecoli</a>  | rcsB | rpoA |
| P0A7R5 | <a href="#">rcsb_ecoli</a> | <a href="#">rs10_ecoli</a>  | rcsB | rpsJ |
| P68679 | <a href="#">rcsb_ecoli</a> | <a href="#">rs21_ecoli</a>  | rcsB | rpsU |
| P0A7V3 | <a href="#">rcsb_ecoli</a> | <a href="#">rs3_ecoli</a>   | rcsB | rpsC |
| P0A7V3 | <a href="#">rcsb_ecoli</a> | <a href="#">rs3_ecoli</a>   | rcsB | rpsC |
| P0A7V8 | <a href="#">rcsb_ecoli</a> | <a href="#">rs4_ecoli</a>   | rcsB | rpsD |
| P80645 | <a href="#">rcsb_ecoli</a> | <a href="#">ssud_ecoli</a>  | rcsB | ssuD |
| P52097 | <a href="#">rcsb_ecoli</a> | <a href="#">tils_ecoli</a>  | rcsB | tilS |
| P37007 | <a href="#">rcsb_ecoli</a> | <a href="#">yaga_ecoli</a>  | rcsB | yagA |
| P76243 | <a href="#">rcsb_ecoli</a> | <a href="#">yeao_ecoli</a>  | rcsB | yeaO |
| Q46811 | <a href="#">rcsb_ecoli</a> | <a href="#">ygfK_ecoli</a>  | rcsB | ygfK |
| P37655 | <a href="#">rcsb_ecoli</a> | <a href="#">yhjq_ecoli</a>  | rcsB | yhjQ |
| P0AFG0 | <a href="#">rdgb_ecoli</a> | <a href="#">nusg_ecoli</a>  | rdgB | nusG |
| P37095 | <a href="#">rdgb_ecoli</a> | <a href="#">pepb_ecoli</a>  | rdgB | pepB |
| P25535 | <a href="#">rdgb_ecoli</a> | <a href="#">visc_ecoli</a>  | rdgB | visC |
| P0A717 | <a href="#">rdgc_ecoli</a> | <a href="#">kprs_ecoli</a>  | rdgC | prs  |
| P18843 | <a href="#">reca_ecoli</a> | <a href="#">nade_ecoli</a>  | recA | nadE |
| P0ABL5 | <a href="#">reca_ecoli</a> | <a href="#">napc_ecoli</a>  | recA | napC |
| P0A7J3 | <a href="#">reca_ecoli</a> | <a href="#">rl10_ecoli</a>  | recA | rplJ |
| P60422 | <a href="#">reca_ecoli</a> | <a href="#">rl2_ecoli</a>   | recA | rplB |
| P64548 | <a href="#">reca_ecoli</a> | <a href="#">yfir_ecoli</a>  | recA | yfiR |
| P36683 | <a href="#">rela_ecoli</a> | <a href="#">acon2_ecoli</a> | relA | acnB |
| P0A9Q7 | <a href="#">rela_ecoli</a> | <a href="#">adhe_ecoli</a>  | relA | adhE |
| P45565 | <a href="#">rela_ecoli</a> | <a href="#">ais_ecoli</a>   | relA | ais  |
| P0A951 | <a href="#">rela_ecoli</a> | <a href="#">atda_ecoli</a>  | relA | speG |
| P0A9A2 | <a href="#">rela_ecoli</a> | <a href="#">ftnb_ecoli</a>  | relA | ftnB |
| P33345 | <a href="#">rela_ecoli</a> | <a href="#">molr_ecoli</a>  | relA | yehH |
| P0AFG8 | <a href="#">rela_ecoli</a> | <a href="#">odp1_ecoli</a>  | relA | aceE |
| P0A7K6 | <a href="#">rela_ecoli</a> | <a href="#">rl19_ecoli</a>  | relA | rplS |
| P60422 | <a href="#">rela_ecoli</a> | <a href="#">rl2_ecoli</a>   | relA | rplB |
| P60723 | <a href="#">rela_ecoli</a> | <a href="#">rl4_ecoli</a>   | relA | rplD |
| P0A7S9 | <a href="#">rela_ecoli</a> | <a href="#">rs13_ecoli</a>  | relA | rpsM |
| P0A9K9 | <a href="#">rela_ecoli</a> | <a href="#">slyd_ecoli</a>  | relA | slyD |
| P75869 | <a href="#">rela_ecoli</a> | <a href="#">sxy_ecoli</a>   | relA | sxy  |
| P0ABL8 | <a href="#">rf2_ecoli</a>  | <a href="#">ccmb_ecoli</a>  | prfB | ccmB |

|        |            |            |      |      |
|--------|------------|------------|------|------|
| P0ACF0 | rf2_ecoli  | dbha_ecoli | prfB | hupA |
| P0ACF4 | rf2_ecoli  | dbhb_ecoli | prfB | hupB |
| P05852 | rf2_ecoli  | gcp_ecoli  | prfB | gcp  |
| P75959 | rf2_ecoli  | nagk_ecoli | prfB | nagK |
| P20083 | rf2_ecoli  | pare_ecoli | prfB | parE |
| P0A7Z4 | rf2_ecoli  | rpoa_ecoli | prfB | rpoA |
| P39301 | rf2_ecoli  | ulaa_ecoli | prfB | ulaA |
| P0AC78 | rf2_ecoli  | weca_ecoli | prfB | wecA |
| P76440 | rf2_ecoli  | yeiT_ecoli | prfB | yeiT |
| P32704 | rf2_ecoli  | yjcf_ecoli | prfB | yjcf |
| P77374 | rf2_ecoli  | ynfe_ecoli | prfB | ynfE |
|        |            |            |      |      |
| P0AES6 | rf3_ecoli  | gyrB_ecoli | prfC | gyrB |
| P0A832 | rf3_ecoli  | ssrp_ecoli | prfC | smpB |
| P0A847 | rf3_ecoli  | tgt_ecoli  | prfC | tgt  |
|        |            |            |      |      |
| P60422 | rfab_ecoli | rl2_ecoli  | rfaB | rplB |
|        |            |            |      |      |
| P03960 | rfaf_ecoli | atkb_ecoli | rfaF | kdpB |
| P0A6F5 | rfaf_ecoli | ch60_ecoli | rfaF | groL |
| P0A6Z3 | rfaf_ecoli | htpg_ecoli | rfaF | htpG |
| P0A7L0 | rfaf_ecoli | rl1_ecoli  | rfaF | rplA |
| P0AG44 | rfaf_ecoli | rl17_ecoli | rfaF | rplQ |
| P60422 | rfaf_ecoli | rl2_ecoli  | rfaF | rplB |
| P0A7V3 | rfaf_ecoli | rs3_ecoli  | rfaF | rpsC |
| P0A7V8 | rfaf_ecoli | rs4_ecoli  | rfaF | rpsD |
| P02359 | rfaf_ecoli | rs7_ecoli  | rfaF | rpsG |
| P39177 | rfaf_ecoli | uspg_ecoli | rfaF | uspG |
|        |            |            |      |      |
| P0A6F5 | rfag_ecoli | ch60_ecoli | rfaG | groL |
| P0AER3 | rfag_ecoli | gltj_ecoli | rfaG | gltJ |
| P60422 | rfag_ecoli | rl2_ecoli  | rfaG | rplB |
| P0A7V3 | rfag_ecoli | rs3_ecoli  | rfaG | rpsC |
| P75989 | rfag_ecoli | ycge_ecoli | rfaG | ycgE |
| P0AA91 | rfag_ecoli | yeay_ecoli | rfaG | yeaY |
|        |            |            |      |      |
| P0A6F5 | rfap_ecoli | ch60_ecoli | rfaP | groL |
| P63284 | rfap_ecoli | clpb_ecoli | rfaP | clpB |
| P05523 | rfap_ecoli | fpg_ecoli  | rfaP | mutM |
| P60422 | rfap_ecoli | rl2_ecoli  | rfaP | rplB |
| P00961 | rfap_ecoli | sygb_ecoli | rfaP | glyS |
|        |            |            |      |      |
| P0AEB2 | rhlb_ecoli | daca_ecoli | rhlB | dacA |

|        |            |             |      |      |
|--------|------------|-------------|------|------|
| P0A6Y8 | rh1b_ecoli | dnak_ecoli  | rh1B | dnaK |
| P0CE47 | rh1b_ecoli | eftu1_ecoli | rh1B | tufA |
| P0A6P9 | rh1b_ecoli | eno_ecoli   | rh1B | eno  |
| P0A6P9 | rh1b_ecoli | eno_ecoli   | rh1B | eno  |
| P31600 | rh1b_ecoli | nfra_ecoli  | rh1B | nfrA |
| P0AFG8 | rh1b_ecoli | odp1_ecoli  | rh1B | aceE |
| P05055 | rh1b_ecoli | pnp_ecoli   | rh1B | pnp  |
| P05055 | rh1b_ecoli | pnp_ecoli   | rh1B | pnp  |
| P0A7L0 | rh1b_ecoli | rl1_ecoli   | rh1B | rplA |
| P0A7J7 | rh1b_ecoli | rl11_ecoli  | rh1B | rplK |
| P0AA10 | rh1b_ecoli | rl13_ecoli  | rh1B | rplM |
| P0A7K6 | rh1b_ecoli | rl19_ecoli  | rh1B | rplS |
| P0AG48 | rh1b_ecoli | rl21_ecoli  | rh1B | rplU |
| P61175 | rh1b_ecoli | rl22_ecoli  | rh1B | rplV |
| P61175 | rh1b_ecoli | rl22_ecoli  | rh1B | rplV |
| P0A7M2 | rh1b_ecoli | rl28_ecoli  | rh1B | rpmB |
| P60438 | rh1b_ecoli | rl3_ecoli   | rh1B | rplC |
| P60438 | rh1b_ecoli | rl3_ecoli   | rh1B | rplC |
| P0A7R1 | rh1b_ecoli | rl9_ecoli   | rh1B | rplI |
| P21513 | rh1b_ecoli | rne_ecoli   | rh1B | rne  |
| P21513 | rh1b_ecoli | rne_ecoli   | rh1B | rne  |
| P21513 | rh1b_ecoli | rne_ecoli   | rh1B | rne  |
| P21513 | rh1b_ecoli | rne_ecoli   | rh1B | rne  |
| P21513 | rh1b_ecoli | rne_ecoli   | rh1B | rne  |
| P0A7R5 | rh1b_ecoli | rs10_ecoli  | rh1B | rpsJ |
| P0A7T3 | rh1b_ecoli | rs16_ecoli  | rh1B | rpsP |
| P0A7U3 | rh1b_ecoli | rs19_ecoli  | rh1B | rpsS |
| P0A7U7 | rh1b_ecoli | rs20_ecoli  | rh1B | rpsT |
| P0A7V3 | rh1b_ecoli | rs3_ecoli   | rh1B | rpsC |
| P0A7V8 | rh1b_ecoli | rs4_ecoli   | rh1B | rpsD |
| P0A7W1 | rh1b_ecoli | rs5_ecoli   | rh1B | rpsE |
| P02358 | rh1b_ecoli | rs6_ecoli   | rh1B | rpsF |
| P02359 | rh1b_ecoli | rs7_ecoli   | rh1B | rpsG |
| P02359 | rh1b_ecoli | rs7_ecoli   | rh1B | rpsG |
|        |            |             |      |      |
| P27303 | rh1e_ecoli | emra_ecoli  | rh1E | emrA |
| P18843 | rh1e_ecoli | nade_ecoli  | rh1E | nadE |
| P38489 | rh1e_ecoli | nfnb_ecoli  | rh1E | nfnB |
| P0AFI7 | rh1e_ecoli | pdxh_ecoli  | rh1E | pdxH |
| P0A7L0 | rh1e_ecoli | rl1_ecoli   | rh1E | rplA |
| P60422 | rh1e_ecoli | rl2_ecoli   | rh1E | rplB |
| P0A7M2 | rh1e_ecoli | rl28_ecoli  | rh1E | rpmB |
| P60438 | rh1e_ecoli | rl3_ecoli   | rh1E | rplC |
| P60723 | rh1e_ecoli | rl4_ecoli   | rh1E | rplD |
| P0A8V2 | rh1e_ecoli | rpob_ecoli  | rh1E | rpoB |

|        |                            |                            |      |      |
|--------|----------------------------|----------------------------|------|------|
| P0A8T7 | <a href="#">rhle_ecoli</a> | <a href="#">rpoc_ecoli</a> | rhIE | rpoC |
| P0AG67 | <a href="#">rhle_ecoli</a> | <a href="#">rs1_ecoli</a>  | rhIE | rpsA |
| P0A7R5 | <a href="#">rhle_ecoli</a> | <a href="#">rs10_ecoli</a> | rhIE | rpsJ |
| P0A7T7 | <a href="#">rhle_ecoli</a> | <a href="#">rs18_ecoli</a> | rhIE | rpsR |
| P0A7V8 | <a href="#">rhle_ecoli</a> | <a href="#">rs4_ecoli</a>  | rhIE | rpsD |
| P02359 | <a href="#">rhle_ecoli</a> | <a href="#">rs7_ecoli</a>  | rhIE | rpsG |
| P0A7X3 | <a href="#">rhle_ecoli</a> | <a href="#">rs9_ecoli</a>  | rhIE | rpsI |
| Q47157 | <a href="#">rhle_ecoli</a> | <a href="#">yafo_ecoli</a> | rhIE | yafO |
| P0AB43 | <a href="#">rhle_ecoli</a> | <a href="#">ycgl_ecoli</a> | rhIE | ycgL |
| P08245 | <a href="#">rhle_ecoli</a> | <a href="#">ycih_ecoli</a> | rhIE | yciH |
| P37338 | <a href="#">rhle_ecoli</a> | <a href="#">ygae_ecoli</a> | rhIE | ygaE |
| P42914 | <a href="#">rhle_ecoli</a> | <a href="#">yrai_ecoli</a> | rhIE | yrat |

|        |                           |                             |     |      |
|--------|---------------------------|-----------------------------|-----|------|
| P0CE47 | <a href="#">rho_ecoli</a> | <a href="#">eftu1_ecoli</a> | rho | tufA |
| P0AES0 | <a href="#">rho_ecoli</a> | <a href="#">gsp_ecoli</a>   | rho | gsp  |
| P38051 | <a href="#">rho_ecoli</a> | <a href="#">menf_ecoli</a>  | rho | menF |
| P0AFG0 | <a href="#">rho_ecoli</a> | <a href="#">nusg_ecoli</a>  | rho | nusG |
| P60438 | <a href="#">rho_ecoli</a> | <a href="#">rl3_ecoli</a>   | rho | rplC |
| P60723 | <a href="#">rho_ecoli</a> | <a href="#">rl4_ecoli</a>   | rho | rplD |
| P0A7K2 | <a href="#">rho_ecoli</a> | <a href="#">rl7_ecoli</a>   | rho | rplL |
| P0A7V0 | <a href="#">rho_ecoli</a> | <a href="#">rs2_ecoli</a>   | rho | rpsB |
| P39177 | <a href="#">rho_ecoli</a> | <a href="#">uspg_ecoli</a>  | rho | uspG |
| P0AGK4 | <a href="#">rho_ecoli</a> | <a href="#">yhby_ecoli</a>  | rho | yhbY |

|        |                            |                            |      |      |
|--------|----------------------------|----------------------------|------|------|
| P0A6F5 | <a href="#">rimj_ecoli</a> | <a href="#">ch60_ecoli</a> | rimJ | groL |
|--------|----------------------------|----------------------------|------|------|

|        |                            |                            |      |      |
|--------|----------------------------|----------------------------|------|------|
| P0ABE7 | <a href="#">rimo_ecoli</a> | <a href="#">c562_ecolx</a> | rimO | cybC |
| P0AC41 | <a href="#">rimo_ecoli</a> | <a href="#">dhsa_ecoli</a> | rimO | sdhA |
| P0A6Y8 | <a href="#">rimo_ecoli</a> | <a href="#">dnak_ecoli</a> | rimO | dnaK |
| P0A6M4 | <a href="#">rimo_ecoli</a> | <a href="#">dtd_ecoli</a>  | rimO | dtd  |
| P0A9A9 | <a href="#">rimo_ecoli</a> | <a href="#">fur_ecoli</a>  | rimO | fur  |
| P0A6B7 | <a href="#">rimo_ecoli</a> | <a href="#">iscs_ecoli</a> | rimO | iscS |
| P18843 | <a href="#">rimo_ecoli</a> | <a href="#">nade_ecoli</a> | rimO | nadE |
| P16916 | <a href="#">rimo_ecoli</a> | <a href="#">rhsa_ecoli</a> | rimO | rhsA |
| P16918 | <a href="#">rimo_ecoli</a> | <a href="#">rhsc_ecoli</a> | rimO | rhsC |
| P0AG44 | <a href="#">rimo_ecoli</a> | <a href="#">rl17_ecoli</a> | rimO | rplQ |
| P0A7V3 | <a href="#">rimo_ecoli</a> | <a href="#">rs3_ecoli</a>  | rimO | rpsC |
| P0A7V8 | <a href="#">rimo_ecoli</a> | <a href="#">rs4_ecoli</a>  | rimO | rpsD |
| P0A7W1 | <a href="#">rimo_ecoli</a> | <a href="#">rs5_ecoli</a>  | rimO | rpsE |
| P0A905 | <a href="#">rimo_ecoli</a> | <a href="#">slyb_ecoli</a> | rimO | slyB |
| P0ACG1 | <a href="#">rimo_ecoli</a> | <a href="#">stpa_ecoli</a> | rimO | stpA |

|        |                            |                            |      |       |
|--------|----------------------------|----------------------------|------|-------|
| P39177 | <a href="#">rimo_ecoli</a> | <a href="#">uspg_ecoli</a> | rimO | uspG  |
| P24252 | <a href="#">rimo_ecoli</a> | <a href="#">ybga_ecoli</a> | rimO | ybgA  |
| P0A7W1 | <a href="#">rimp_ecoli</a> | <a href="#">rs5_ecoli</a>  | rimP | rpsE  |
| P02359 | <a href="#">rimp_ecoli</a> | <a href="#">rs7_ecoli</a>  | rimP | rpsG  |
| P0A8H6 | <a href="#">rimp_ecoli</a> | <a href="#">yihl_ecoli</a> | rimP | yihl  |
| P31119 | <a href="#">risa_ecoli</a> | <a href="#">aas_ecoli</a>  | ribE | aas   |
| P0A6M8 | <a href="#">risa_ecoli</a> | <a href="#">efg_ecoli</a>  | ribE | fusA  |
| P76558 | <a href="#">risa_ecoli</a> | <a href="#">mao2_ecoli</a> | ribE | maeB  |
| P0A6Y8 | <a href="#">rl10_ecoli</a> | <a href="#">dnak_ecoli</a> | rplJ | dnaK  |
| P21889 | <a href="#">rl10_ecoli</a> | <a href="#">syd_ecoli</a>  | rplJ | aspS  |
| P0A6Y8 | <a href="#">rl11_ecoli</a> | <a href="#">dnak_ecoli</a> | rplK | dnaK  |
| P27294 | <a href="#">rl11_ecoli</a> | <a href="#">inaa_ecoli</a> | rplK | inaA  |
| P19776 | <a href="#">rl11_ecoli</a> | <a href="#">insc_ecoli</a> | rplK | insC7 |
| P18843 | <a href="#">rl11_ecoli</a> | <a href="#">nade_ecoli</a> | rplK | nadE  |
| P69411 | <a href="#">rl11_ecoli</a> | <a href="#">rcsf_ecoli</a> | rplK | rcsF  |
| P76569 | <a href="#">rl11_ecoli</a> | <a href="#">yfgd_ecoli</a> | rplK | yfgD  |
| P0AB43 | <a href="#">rl13_ecoli</a> | <a href="#">ycgl_ecoli</a> | rplM | ycgL  |
| P64521 | <a href="#">rl13_ecoli</a> | <a href="#">yeet_ecoli</a> | rplM | yeeT  |
| P37028 | <a href="#">rl15_ecoli</a> | <a href="#">btuf_ecoli</a> | rplO | btuF  |
| P0AB43 | <a href="#">rl15_ecoli</a> | <a href="#">ycgl_ecoli</a> | rplO | ycgL  |
| P37326 | <a href="#">rl17_ecoli</a> | <a href="#">ints_ecoli</a> | rplQ | intS  |
| P0A9K9 | <a href="#">rl17_ecoli</a> | <a href="#">slyd_ecoli</a> | rplQ | slyD  |
| P64574 | <a href="#">rl17_ecoli</a> | <a href="#">yghw_ecoli</a> | rplQ | yghW  |
| P39351 | <a href="#">rl17_ecoli</a> | <a href="#">yjgz_ecoli</a> | rplQ | yjgZ  |
| P0AFJ5 | <a href="#">rl18_ecoli</a> | <a href="#">phob_ecoli</a> | rplR | phoB  |
| P60782 | <a href="#">rl18_ecoli</a> | <a href="#">plsy_ecoli</a> | rplR | plsY  |
| P0A948 | <a href="#">rl18_ecoli</a> | <a href="#">rimj_ecoli</a> | rplR | rimJ  |
| P0A761 | <a href="#">rl19_ecoli</a> | <a href="#">nane_ecoli</a> | rplS | nanE  |
| P11071 | <a href="#">rl2_ecoli</a>  | <a href="#">acek_ecoli</a> | rplB | aceK  |

|        |                            |                            |      |      |
|--------|----------------------------|----------------------------|------|------|
| P0A6Y8 | <a href="#">rl2_ecoli</a>  | <a href="#">dnak_ecoli</a> | rplB | dnaK |
| P39177 | <a href="#">rl2_ecoli</a>  | <a href="#">uspg_ecoli</a> | rplB | uspG |
| P0AED5 | <a href="#">rl2_ecoli</a>  | <a href="#">uvry_ecoli</a> | rplB | uvrY |
| P25728 | <a href="#">rl2_ecoli</a>  | <a href="#">ygba_ecoli</a> | rplB | ygba |
|        |                            |                            |      |      |
| P32167 | <a href="#">rl22_ecoli</a> | <a href="#">yiiX_ecoli</a> | rplV | yiiX |
| P09162 | <a href="#">rl22_ecoli</a> | <a href="#">yjaA_ecoli</a> | rplV | yjaA |
| P75977 | <a href="#">rl22_ecoli</a> | <a href="#">ymfm_ecoli</a> | rplV | ymfM |
|        |                            |                            |      |      |
| P10408 | <a href="#">rl23_ecoli</a> | <a href="#">seca_ecoli</a> | rplW | secA |
|        |                            |                            |      |      |
| P0AFJ5 | <a href="#">rl24_ecoli</a> | <a href="#">phob_ecoli</a> | rplX | phoB |
|        |                            |                            |      |      |
| P0A6Y8 | <a href="#">rl25_ecoli</a> | <a href="#">dnak_ecoli</a> | rplY | dnaK |
|        |                            |                            |      |      |
| P22255 | <a href="#">rl27_ecoli</a> | <a href="#">cysQ_ecoli</a> | rpmA | cysQ |
| P0A6W5 | <a href="#">rl27_ecoli</a> | <a href="#">greA_ecoli</a> | rpmA | greA |
| P18843 | <a href="#">rl27_ecoli</a> | <a href="#">nade_ecoli</a> | rpmA | nadE |
| P39351 | <a href="#">rl27_ecoli</a> | <a href="#">yJgZ_ecoli</a> | rpmA | yJgZ |
|        |                            |                            |      |      |
| P0AE58 | <a href="#">rl3_ecoli</a>  | <a href="#">caiF_ecoli</a> | rplC | caiF |
| P0A6Y8 | <a href="#">rl3_ecoli</a>  | <a href="#">dnak_ecoli</a> | rplC | dnaK |
| P0ABU0 | <a href="#">rl3_ecoli</a>  | <a href="#">menB_ecoli</a> | rplC | menB |
| P0AG90 | <a href="#">rl3_ecoli</a>  | <a href="#">secD_ecoli</a> | rplC | secD |
| P75970 | <a href="#">rl3_ecoli</a>  | <a href="#">xisE_ecoli</a> | rplC | xisE |
| P08245 | <a href="#">rl3_ecoli</a>  | <a href="#">yciH_ecoli</a> | rplC | yciH |
| P76148 | <a href="#">rl3_ecoli</a>  | <a href="#">yneG_ecoli</a> | rplC | yneG |
|        |                            |                            |      |      |
| P0A6Y8 | <a href="#">rl33_ecoli</a> | <a href="#">dnak_ecoli</a> | rpmG | dnaK |
| Q47270 | <a href="#">rl33_ecoli</a> | <a href="#">ninE_ecoli</a> | rpmG | ninE |
| P0AAU2 | <a href="#">rl33_ecoli</a> | <a href="#">ybfA_ecoli</a> | rpmG | ybfA |
| P77129 | <a href="#">rl33_ecoli</a> | <a href="#">ylbE_ecoli</a> | rpmG | ylbE |

|        |           |            |      |      |
|--------|-----------|------------|------|------|
| P0ABH9 | rl4_ecoli | clpa_ecoli | rplD | clpA |
| P0A9P6 | rl4_ecoli | dead_ecoli | rplD | deaD |
| P0A6Y8 | rl4_ecoli | dnak_ecoli | rplD | dnaK |
| P0ABT2 | rl4_ecoli | dps_ecoli  | rplD | dps  |
| P0A6M8 | rl4_ecoli | efg_ecoli  | rplD | fusA |
| P0C8J8 | rl4_ecoli | gatz_ecoli | rplD | gatZ |
| P09373 | rl4_ecoli | pflb_ecoli | rplD | pflB |
| P0AG30 | rl4_ecoli | rho_ecoli  | rplD | rho  |
| P21499 | rl4_ecoli | rnrr_ecoli | rplD | rnrr |
| P0A8T7 | rl4_ecoli | rpoc_ecoli | rplD | rpoC |
| P10408 | rl4_ecoli | seca_ecoli | rplD | secA |
| P0A9K9 | rl4_ecoli | slyd_ecoli | rplD | slyD |
| P21507 | rl4_ecoli | srmB_ecoli | rplD | srmB |
| P30871 | rl4_ecoli | ygif_ecoli | rplD | ygiF |
| P37640 | rl4_ecoli | yhjb_ecoli | rplD | yhjB |

|        |           |            |      |      |
|--------|-----------|------------|------|------|
| P76399 | rl6_ecoli | mdtc_ecoli | rplF | mdtC |
| P0A7A7 | rl6_ecoli | plsB_ecoli | rplF | plsB |

|        |           |            |      |      |
|--------|-----------|------------|------|------|
| P0A6Y8 | rl9_ecoli | dnak_ecoli | rplI | dnaK |
| P76104 | rl9_ecoli | ydcP_ecoli | rplI | ydcP |

|        |            |            |      |      |
|--------|------------|------------|------|------|
| P05052 | rlmI_ecoli | appy_ecoli | rlmL | appY |
| P24183 | rlmI_ecoli | fdng_ecoli | rlmL | fdnG |
| P77432 | rlmI_ecoli | lsrk_ecoli | rlmL | lsrK |
| P18843 | rlmI_ecoli | nade_ecoli | rlmL | nadE |
| P0ABL5 | rlmI_ecoli | napc_ecoli | rlmL | napC |
| P0A7L0 | rlmI_ecoli | rl1_ecoli  | rlmL | rplA |
| P0A7L0 | rlmI_ecoli | rl1_ecoli  | rlmL | rplA |
| P0AG44 | rlmI_ecoli | rl17_ecoli | rlmL | rplQ |
| P60422 | rlmI_ecoli | rl2_ecoli  | rlmL | rplB |
| P60438 | rlmI_ecoli | rl3_ecoli  | rlmL | rplC |
| P0A7V3 | rlmI_ecoli | rs3_ecoli  | rlmL | rpsC |
| P0A7V8 | rlmI_ecoli | rs4_ecoli  | rlmL | rpsD |
| P02359 | rlmI_ecoli | rs7_ecoli  | rlmL | rpsG |
| P0A7X3 | rlmI_ecoli | rs9_ecoli  | rlmL | rpsI |
| P0AA43 | rlmI_ecoli | rsua_ecoli | rlmL | rsuA |
| P76573 | rlmI_ecoli | yfgI_ecoli | rlmL | yfgI |
| P0AGJ5 | rlmI_ecoli | yfif_ecoli | rlmL | yfiF |



|        |            |             |      |      |
|--------|------------|-------------|------|------|
| Q46810 | rlml_ecoli | ygfj_ecoli  | rlmL | ygfJ |
| P76092 | rlml_ecoli | ynbc_ecoli  | rlmL | ynbC |
| P0A6F5 | rlmm_ecoli | ch60_ecoli  | rlmM | groL |
| P0AEM9 | rlmm_ecoli | fliy_ecoli  | rlmM | fliY |
| P0AG44 | rlmm_ecoli | rl17_ecoli  | rlmM | rplQ |
| P60422 | rlmm_ecoli | rl2_ecoli   | rlmM | rplB |
| P60723 | rlmm_ecoli | rl4_ecoli   | rlmM | rplD |
| P36999 | rlmm_ecoli | rlma_ecoli  | rlmM | rlmA |
| P77223 | rlmm_ecoli | rnfb_ecoli  | rlmM | rnfB |
| P0A7S9 | rlmm_ecoli | rs13_ecoli  | rlmM | rpsM |
| P0A7V3 | rlmm_ecoli | rs3_ecoli   | rlmM | rpsC |
| P02359 | rlmm_ecoli | rs7_ecoli   | rlmM | rpsG |
| P0A870 | rlmm_ecoli | talb_ecoli  | rlmM | talB |
| Q46798 | rlmm_ecoli | yger_ecoli  | rlmM | ygeR |
| P64574 | rlmm_ecoli | yghw_ecoli  | rlmM | yghW |
| P31119 | rlmn_ecoli | aas_ecoli   | rlmN | aas  |
| P0A6F5 | rlmn_ecoli | ch60_ecoli  | rlmN | groL |
| P0ABH9 | rlmn_ecoli | clpa_ecoli  | rlmN | clpA |
| P63284 | rlmn_ecoli | clpb_ecoli  | rlmN | clpB |
| P0A6K1 | rlmn_ecoli | dapf_ecoli  | rlmN | dapF |
| P0ACF0 | rlmn_ecoli | dbha_ecoli  | rlmN | hupA |
| P0A9P6 | rlmn_ecoli | dead_ecoli  | rlmN | deaD |
| P0A9P0 | rlmn_ecoli | dldh_ecoli  | rlmN | lpdA |
| P08622 | rlmn_ecoli | dnaj_ecoli  | rlmN | dnaJ |
| P08622 | rlmn_ecoli | dnaj_ecoli  | rlmN | dnaJ |
| P0A6M8 | rlmn_ecoli | efg_ecoli   | rlmN | fusA |
| POCE47 | rlmn_ecoli | eftu1_ecoli | rlmN | tufA |
| POCE47 | rlmn_ecoli | eftu1_ecoli | rlmN | tufA |
| P0AEH5 | rlmn_ecoli | elab_ecoli  | rlmN | elaB |
| P0ACP1 | rlmn_ecoli | frur_ecoli  | rlmN | fruR |
| POC8J6 | rlmn_ecoli | gaty_ecoli  | rlmN | gatY |
| P0AES6 | rlmn_ecoli | gyrb_ecoli  | rlmN | gyrB |
| P0ACE7 | rlmn_ecoli | hint_ecoli  | rlmN | hinT |
| P43329 | rlmn_ecoli | hrpa_ecoli  | rlmN | hrpA |
| P0A705 | rlmn_ecoli | if2_ecoli   | rlmN | infB |
| P0A707 | rlmn_ecoli | if3_ecoli   | rlmN | infC |
| P0A9M0 | rlmn_ecoli | lon_ecoli   | rlmN | lon  |
| P06993 | rlmn_ecoli | malt_ecoli  | rlmN | malT |
| P77188 | rlmn_ecoli | matc_ecoli  | rlmN | matC |
| P02942 | rlmn_ecoli | mcp1_ecoli  | rlmN | tsr  |
| P02921 | rlmn_ecoli | melb_ecoli  | rlmN | melB |
| P0A817 | rlmn_ecoli | metk_ecoli  | rlmN | metK |
| P0A9X4 | rlmn_ecoli | mreb_ecoli  | rlmN | mreB |

|        |                            |                             |      |      |
|--------|----------------------------|-----------------------------|------|------|
| P18843 | <a href="#">rlmn_ecoli</a> | <a href="#">nade_ecoli</a>  | rlmN | nadE |
| P33599 | <a href="#">rlmn_ecoli</a> | <a href="#">nuocd_ecoli</a> | rlmN | nuoC |
| P33021 | <a href="#">rlmn_ecoli</a> | <a href="#">nupx_ecoli</a>  | rlmN | nupX |
| P0AFG8 | <a href="#">rlmn_ecoli</a> | <a href="#">odp1_ecoli</a>  | rlmN | aceE |
| P06959 | <a href="#">rlmn_ecoli</a> | <a href="#">odp2_ecoli</a>  | rlmN | aceF |
| P06996 | <a href="#">rlmn_ecoli</a> | <a href="#">ompc_ecoli</a>  | rlmN | ompC |
| P02932 | <a href="#">rlmn_ecoli</a> | <a href="#">phoe_ecoli</a>  | rlmN | phoE |
| P08400 | <a href="#">rlmn_ecoli</a> | <a href="#">phor_ecoli</a>  | rlmN | phoR |
| P05055 | <a href="#">rlmn_ecoli</a> | <a href="#">pnp_ecoli</a>   | rlmN | pnp  |
| P69407 | <a href="#">rlmn_ecoli</a> | <a href="#">rcsb_ecoli</a>  | rlmN | rcsB |
| P0A7G6 | <a href="#">rlmn_ecoli</a> | <a href="#">reca_ecoli</a>  | rlmN | recA |
| P0A7L0 | <a href="#">rlmn_ecoli</a> | <a href="#">rl1_ecoli</a>   | rlmN | rplA |
| P0A7L0 | <a href="#">rlmn_ecoli</a> | <a href="#">rl1_ecoli</a>   | rlmN | rplA |
| P0A7L0 | <a href="#">rlmn_ecoli</a> | <a href="#">rl1_ecoli</a>   | rlmN | rplA |
| P0AA10 | <a href="#">rlmn_ecoli</a> | <a href="#">rl13_ecoli</a>  | rlmN | rplM |
| P0AA10 | <a href="#">rlmn_ecoli</a> | <a href="#">rl13_ecoli</a>  | rlmN | rplM |
| P02413 | <a href="#">rlmn_ecoli</a> | <a href="#">rl15_ecoli</a>  | rlmN | rplO |
| P02413 | <a href="#">rlmn_ecoli</a> | <a href="#">rl15_ecoli</a>  | rlmN | rplO |
| P0AG44 | <a href="#">rlmn_ecoli</a> | <a href="#">rl17_ecoli</a>  | rlmN | rplQ |
| P0C018 | <a href="#">rlmn_ecoli</a> | <a href="#">rl18_ecoli</a>  | rlmN | rplR |
| P0A7K6 | <a href="#">rlmn_ecoli</a> | <a href="#">rl19_ecoli</a>  | rlmN | rplS |
| P0A7K6 | <a href="#">rlmn_ecoli</a> | <a href="#">rl19_ecoli</a>  | rlmN | rplS |
| P60422 | <a href="#">rlmn_ecoli</a> | <a href="#">rl2_ecoli</a>   | rlmN | rplB |
| P60422 | <a href="#">rlmn_ecoli</a> | <a href="#">rl2_ecoli</a>   | rlmN | rplB |
| P60422 | <a href="#">rlmn_ecoli</a> | <a href="#">rl2_ecoli</a>   | rlmN | rplB |
| P0A7L3 | <a href="#">rlmn_ecoli</a> | <a href="#">rl20_ecoli</a>  | rlmN | rplT |
| P0AG48 | <a href="#">rlmn_ecoli</a> | <a href="#">rl21_ecoli</a>  | rlmN | rplU |
| P61175 | <a href="#">rlmn_ecoli</a> | <a href="#">rl22_ecoli</a>  | rlmN | rplV |
| P61175 | <a href="#">rlmn_ecoli</a> | <a href="#">rl22_ecoli</a>  | rlmN | rplV |
| P0ADZ0 | <a href="#">rlmn_ecoli</a> | <a href="#">rl23_ecoli</a>  | rlmN | rplW |
| P60624 | <a href="#">rlmn_ecoli</a> | <a href="#">rl24_ecoli</a>  | rlmN | rplX |
| P60624 | <a href="#">rlmn_ecoli</a> | <a href="#">rl24_ecoli</a>  | rlmN | rplX |
| P0A7L8 | <a href="#">rlmn_ecoli</a> | <a href="#">rl27_ecoli</a>  | rlmN | rpmA |
| P0A7M2 | <a href="#">rlmn_ecoli</a> | <a href="#">rl28_ecoli</a>  | rlmN | rpmB |
| P0A7M6 | <a href="#">rlmn_ecoli</a> | <a href="#">rl29_ecoli</a>  | rlmN | rpmC |
| P60438 | <a href="#">rlmn_ecoli</a> | <a href="#">rl3_ecoli</a>   | rlmN | rplC |
| P60438 | <a href="#">rlmn_ecoli</a> | <a href="#">rl3_ecoli</a>   | rlmN | rplC |
| P60438 | <a href="#">rlmn_ecoli</a> | <a href="#">rl3_ecoli</a>   | rlmN | rplC |
| P60723 | <a href="#">rlmn_ecoli</a> | <a href="#">rl4_ecoli</a>   | rlmN | rplD |
| P60723 | <a href="#">rlmn_ecoli</a> | <a href="#">rl4_ecoli</a>   | rlmN | rplD |
| P62399 | <a href="#">rlmn_ecoli</a> | <a href="#">rl5_ecoli</a>   | rlmN | rplE |
| P62399 | <a href="#">rlmn_ecoli</a> | <a href="#">rl5_ecoli</a>   | rlmN | rplE |
| P0AG55 | <a href="#">rlmn_ecoli</a> | <a href="#">rl6_ecoli</a>   | rlmN | rplF |
| P0A7K2 | <a href="#">rlmn_ecoli</a> | <a href="#">rl7_ecoli</a>   | rlmN | rplL |
| P0A7R1 | <a href="#">rlmn_ecoli</a> | <a href="#">rl9_ecoli</a>   | rlmN | rplI |

|        |            |            |      |      |
|--------|------------|------------|------|------|
| P0A7R1 | rlmn_ecoli | rl9_ecoli  | rlmN | rplI |
| P75864 | rlmn_ecoli | rlml_ecoli | rlmN | rlmL |
| P37765 | rlmn_ecoli | rlub_ecoli | rlmN | rluB |
| P37765 | rlmn_ecoli | rlub_ecoli | rlmN | rluB |
| P21513 | rlmn_ecoli | rne_ecoli  | rlmN | rne  |
| P21499 | rlmn_ecoli | rnr_ecoli  | rlmN | rnr  |
| P21499 | rlmn_ecoli | rnr_ecoli  | rlmN | rnr  |
| P0A8T7 | rlmn_ecoli | rpoc_ecoli | rlmN | rpoC |
| P0AG67 | rlmn_ecoli | rs1_ecoli  | rlmN | rpsA |
| P0AG67 | rlmn_ecoli | rs1_ecoli  | rlmN | rpsA |
| P0A7R5 | rlmn_ecoli | rs10_ecoli | rlmN | rpsJ |
| P0A7R5 | rlmn_ecoli | rs10_ecoli | rlmN | rpsJ |
| P0AG59 | rlmn_ecoli | rs14_ecoli | rlmN | rpsN |
| P0A7T3 | rlmn_ecoli | rs16_ecoli | rlmN | rpsP |
| P0A7T7 | rlmn_ecoli | rs18_ecoli | rlmN | rpsR |
| P0A7V0 | rlmn_ecoli | rs2_ecoli  | rlmN | rpsB |
| P0A7V0 | rlmn_ecoli | rs2_ecoli  | rlmN | rpsB |
| P0A7V3 | rlmn_ecoli | rs3_ecoli  | rlmN | rpsC |
| P0A7V3 | rlmn_ecoli | rs3_ecoli  | rlmN | rpsC |
| P0A7V8 | rlmn_ecoli | rs4_ecoli  | rlmN | rpsD |
| P0A7V8 | rlmn_ecoli | rs4_ecoli  | rlmN | rpsD |
| P0A7W1 | rlmn_ecoli | rs5_ecoli  | rlmN | rpsE |
| P0A7W1 | rlmn_ecoli | rs5_ecoli  | rlmN | rpsE |
| P02358 | rlmn_ecoli | rs6_ecoli  | rlmN | rpsF |
| P02359 | rlmn_ecoli | rs7_ecoli  | rlmN | rpsG |
| P02359 | rlmn_ecoli | rs7_ecoli  | rlmN | rpsG |
| P10408 | rlmn_ecoli | seca_ecoli | rlmN | secA |
| P10408 | rlmn_ecoli | seca_ecoli | rlmN | secA |
| P14081 | rlmn_ecoli | selb_ecoli | rlmN | selB |
| P14081 | rlmn_ecoli | selb_ecoli | rlmN | selB |
| P0AEU7 | rlmn_ecoli | skp_ecoli  | rlmN | skp  |
| P0AG24 | rlmn_ecoli | spot_ecoli | rlmN | spoT |
| P21507 | rlmn_ecoli | srmB_ecoli | rlmN | srmB |
| P21507 | rlmn_ecoli | srmB_ecoli | rlmN | srmB |
| P0A8N3 | rlmn_ecoli | syk1_ecoli | rlmN | lysS |
| P0A8N5 | rlmn_ecoli | syk2_ecoli | rlmN | lysU |
| P71238 | rlmn_ecoli | wcad_ecoli | rlmN | wcaD |
| P77199 | rlmn_ecoli | yait_ecoli | rlmN | yaiT |
| P08245 | rlmn_ecoli | ycih_ecoli | rlmN | yciH |
| P76104 | rlmn_ecoli | ydcP_ecoli | rlmN | ydcP |
| P0A8M6 | rlmn_ecoli | yeex_ecoli | rlmN | yeeX |
| P0AGJ5 | rlmn_ecoli | yfiF_ecoli | rlmN | yfiF |
| P0AGJ5 | rlmn_ecoli | yfiF_ecoli | rlmN | yfiF |
| P0ADQ7 | rlmn_ecoli | ygam_ecoli | rlmN | ygaM |
| P30871 | rlmn_ecoli | ygif_ecoli | rlmN | ygiF |

|        |            |            |      |      |
|--------|------------|------------|------|------|
| P0AGK4 | rlmn_ecoli | yhby_ecoli | rlmN | yhby |
| P37634 | rlmn_ecoli | yhir_ecoli | rlmN | yhiR |
| P37634 | rlmn_ecoli | yhir_ecoli | rlmN | yhiR |
| P0ADK8 | rlmn_ecoli | yibl_ecoli | rlmN | yibL |
|        |            |            |      |      |
| P33224 | rlub_ecoli | aidb_ecoli | rluB | aidB |
| P0ACF0 | rlub_ecoli | dbha_ecoli | rluB | hupA |
| P43329 | rlub_ecoli | hrpa_ecoli | rluB | hrpA |
| P43329 | rlub_ecoli | hrpa_ecoli | rluB | hrpA |
| P77188 | rlub_ecoli | matc_ecoli | rluB | matC |
| P0AFG8 | rlub_ecoli | odp1_ecoli | rluB | aceE |
| P05055 | rlub_ecoli | pnp_ecoli  | rluB | pnp  |
| P23830 | rlub_ecoli | pss_ecoli  | rluB | pssA |
| P0A7L0 | rlub_ecoli | rl1_ecoli  | rluB | rplA |
| P0A7L0 | rlub_ecoli | rl1_ecoli  | rluB | rplA |
| P0AA10 | rlub_ecoli | rl13_ecoli | rluB | rplM |
| P0AA10 | rlub_ecoli | rl13_ecoli | rluB | rplM |
| P0A7K6 | rlub_ecoli | rl19_ecoli | rluB | rplS |
| P60422 | rlub_ecoli | rl2_ecoli  | rluB | rplB |
| P0AG48 | rlub_ecoli | rl21_ecoli | rluB | rplU |
| P61175 | rlub_ecoli | rl22_ecoli | rluB | rplV |
| P60624 | rlub_ecoli | rl24_ecoli | rluB | rplX |
| P68919 | rlub_ecoli | rl25_ecoli | rluB | rplY |
| P0A7M2 | rlub_ecoli | rl28_ecoli | rluB | rpmB |
| P60438 | rlub_ecoli | rl3_ecoli  | rluB | rplC |
| P60438 | rlub_ecoli | rl3_ecoli  | rluB | rplC |
| P60723 | rlub_ecoli | rl4_ecoli  | rluB | rplD |
| P60723 | rlub_ecoli | rl4_ecoli  | rluB | rplD |
| P62399 | rlub_ecoli | rl5_ecoli  | rluB | rplE |
| P0AG55 | rlub_ecoli | rl6_ecoli  | rluB | rplF |
| P0A7R1 | rlub_ecoli | rl9_ecoli  | rluB | rplI |
| P0A7R1 | rlub_ecoli | rl9_ecoli  | rluB | rplI |
| P75864 | rlub_ecoli | rlml_ecoli | rluB | rlmL |
| P75966 | rlub_ecoli | rlue_ecoli | rluB | rluE |
| P21499 | rlub_ecoli | rnrc_ecoli | rluB | rnrc |
| P21499 | rlub_ecoli | rnrc_ecoli | rluB | rnrc |
| P0AG67 | rlub_ecoli | rs1_ecoli  | rluB | rpsA |
| P0AG67 | rlub_ecoli | rs1_ecoli  | rluB | rpsA |
| P0A7R5 | rlub_ecoli | rs10_ecoli | rluB | rpsJ |
| P0A7R5 | rlub_ecoli | rs10_ecoli | rluB | rpsJ |
| P0A7S9 | rlub_ecoli | rs13_ecoli | rluB | rpsM |
| P0AG59 | rlub_ecoli | rs14_ecoli | rluB | rpsN |
| P0A7T3 | rlub_ecoli | rs16_ecoli | rluB | rpsP |

|        |            |            |      |      |
|--------|------------|------------|------|------|
| P0A7T7 | rlub_ecoli | rs18_ecoli | rluB | rpsR |
| P0A7V0 | rlub_ecoli | rs2_ecoli  | rluB | rpsB |
| P0A7U7 | rlub_ecoli | rs20_ecoli | rluB | rpsT |
| P68679 | rlub_ecoli | rs21_ecoli | rluB | rpsU |
| P0A7V3 | rlub_ecoli | rs3_ecoli  | rluB | rpsC |
| P0A7V8 | rlub_ecoli | rs4_ecoli  | rluB | rpsD |
| P0A7W1 | rlub_ecoli | rs5_ecoli  | rluB | rpsE |
| P0A7W1 | rlub_ecoli | rs5_ecoli  | rluB | rpsE |
| P02358 | rlub_ecoli | rs6_ecoli  | rluB | rpsF |
| P02359 | rlub_ecoli | rs7_ecoli  | rluB | rpsG |
| P02359 | rlub_ecoli | rs7_ecoli  | rluB | rpsG |
| P21507 | rlub_ecoli | srmB_ecoli | rluB | srmB |
| P21507 | rlub_ecoli | srmB_ecoli | rluB | srmB |
| P00957 | rlub_ecoli | sya_ecoli  | rluB | alaS |
| P77766 | rlub_ecoli | trph_ecoli | rluB | trpH |
| P0A9U1 | rlub_ecoli | ybhf_ecoli | rluB | ybhF |
| P31808 | rlub_ecoli | ycik_ecoli | rluB | yciK |
| P0AGJ5 | rlub_ecoli | yfif_ecoli | rluB | yfiF |
| P30871 | rlub_ecoli | ygif_ecoli | rluB | ygiF |
| P30871 | rlub_ecoli | ygif_ecoli | rluB | ygiF |
| P67762 | rlub_ecoli | yhbp_ecoli | rluB | yhbP |
| P0AGK4 | rlub_ecoli | yhby_ecoli | rluB | yhbY |
| P28722 | rlub_ecoli | yhca_ecoli | rluB | yhcA |
| P37631 | rlub_ecoli | yhin_ecoli | rluB | yhiN |
| P37634 | rlub_ecoli | yhir_ecoli | rluB | yhiR |
| P37634 | rlub_ecoli | yhir_ecoli | rluB | yhiR |
| P0ADK8 | rlub_ecoli | yibl_ecoli | rluB | yibL |
|        |            |            |      |      |
| P0ABD5 | rluc_ecoli | acca_ecoli | rluC | accA |
| P33224 | rluc_ecoli | aidb_ecoli | rluC | aidB |
| P0ACF0 | rluc_ecoli | dbha_ecoli | rluC | hupA |
| P0ACF4 | rluc_ecoli | dbhb_ecoli | rluC | hupB |
| P0A9P6 | rluc_ecoli | dead_ecoli | rluC | deaD |
| P0A9P0 | rluc_ecoli | dldh_ecoli | rluC | lpdA |
| P0A9P0 | rluc_ecoli | dldh_ecoli | rluC | lpdA |
| P43329 | rluc_ecoli | hrpa_ecoli | rluC | hrpA |
| P0AFG8 | rluc_ecoli | odp1_ecoli | rluC | aceE |
| P06959 | rluc_ecoli | odp2_ecoli | rluC | aceF |
| P23830 | rluc_ecoli | pss_ecoli  | rluC | pssA |
| P23830 | rluc_ecoli | pss_ecoli  | rluC | pssA |
| P37177 | rluc_ecoli | pt1p_ecoli | rluC | ptsP |
| P25888 | rluc_ecoli | rhle_ecoli | rluC | rhIE |
| P0A7L0 | rluc_ecoli | rl1_ecoli  | rluC | rplA |
| P0A7L0 | rluc_ecoli | rl1_ecoli  | rluC | rplA |
| P0A7L0 | rluc_ecoli | rl1_ecoli  | rluC | rplA |

|        |            |            |      |      |
|--------|------------|------------|------|------|
| P0AA10 | rluc_ecoli | rl13_ecoli | rluC | rpIM |
| P0AA10 | rluc_ecoli | rl13_ecoli | rluC | rpIM |
| P0ADY3 | rluc_ecoli | rl14_ecoli | rluC | rpIN |
| P02413 | rluc_ecoli | rl15_ecoli | rluC | rpIO |
| P02413 | rluc_ecoli | rl15_ecoli | rluC | rpIO |
| P0ADY7 | rluc_ecoli | rl16_ecoli | rluC | rpIP |
| P0AG44 | rluc_ecoli | rl17_ecoli | rluC | rpIQ |
| P0AG44 | rluc_ecoli | rl17_ecoli | rluC | rpIQ |
| P0C018 | rluc_ecoli | rl18_ecoli | rluC | rpIR |
| P0A7K6 | rluc_ecoli | rl19_ecoli | rluC | rpIS |
| P0A7K6 | rluc_ecoli | rl19_ecoli | rluC | rpIS |
| P60422 | rluc_ecoli | rl2_ecoli  | rluC | rpIB |
| P60422 | rluc_ecoli | rl2_ecoli  | rluC | rpIB |
| P60422 | rluc_ecoli | rl2_ecoli  | rluC | rpIB |
| P0A7L3 | rluc_ecoli | rl20_ecoli | rluC | rpIT |
| P0AG48 | rluc_ecoli | rl21_ecoli | rluC | rpIU |
| P0AG48 | rluc_ecoli | rl21_ecoli | rluC | rpIU |
| P61175 | rluc_ecoli | rl22_ecoli | rluC | rpIV |
| P61175 | rluc_ecoli | rl22_ecoli | rluC | rpIV |
| P60624 | rluc_ecoli | rl24_ecoli | rluC | rpIX |
| P60624 | rluc_ecoli | rl24_ecoli | rluC | rpIX |
| P0A7M2 | rluc_ecoli | rl28_ecoli | rluC | rpmB |
| P60438 | rluc_ecoli | rl3_ecoli  | rluC | rpIC |
| P60438 | rluc_ecoli | rl3_ecoli  | rluC | rpIC |
| P60723 | rluc_ecoli | rl4_ecoli  | rluC | rpID |
| P60723 | rluc_ecoli | rl4_ecoli  | rluC | rpID |
| P62399 | rluc_ecoli | rl5_ecoli  | rluC | rpIE |
| P0AG55 | rluc_ecoli | rl6_ecoli  | rluC | rpIF |
| P0AG55 | rluc_ecoli | rl6_ecoli  | rluC | rpIF |
| P0A7K2 | rluc_ecoli | rl7_ecoli  | rluC | rpIL |
| P0A7R1 | rluc_ecoli | rl9_ecoli  | rluC | rpII |
| P0A7R1 | rluc_ecoli | rl9_ecoli  | rluC | rpII |
| P75864 | rluc_ecoli | rlml_ecoli | rluC | rlmL |
| P75864 | rluc_ecoli | rlml_ecoli | rluC | rlmL |
| P37765 | rluc_ecoli | rlub_ecoli | rluC | rluB |
| P37765 | rluc_ecoli | rlub_ecoli | rluC | rluB |
| P75966 | rluc_ecoli | rlue_ecoli | rluC | rluE |
| P21499 | rluc_ecoli | rnrc_ecoli | rluC | rnrc |
| P21499 | rluc_ecoli | rnrc_ecoli | rluC | rnrc |
| P0A8V2 | rluc_ecoli | rpob_ecoli | rluC | rpoB |
| P0A8V2 | rluc_ecoli | rpob_ecoli | rluC | rpoB |
| P0A8T7 | rluc_ecoli | rpoc_ecoli | rluC | rpoC |
| P0A8T7 | rluc_ecoli | rpoc_ecoli | rluC | rpoC |
| P0AG67 | rluc_ecoli | rs1_ecoli  | rluC | rpsA |
| P0A7S9 | rluc_ecoli | rs13_ecoli | rluC | rpsM |

|        |            |            |      |      |
|--------|------------|------------|------|------|
| P0A7S9 | rluc_ecoli | rs13_ecoli | rluC | rpsM |
| P0A7S9 | rluc_ecoli | rs13_ecoli | rluC | rpsM |
| P0AG59 | rluc_ecoli | rs14_ecoli | rluC | rpsN |
| P0A7T3 | rluc_ecoli | rs16_ecoli | rluC | rpsP |
| P0A7T7 | rluc_ecoli | rs18_ecoli | rluC | rpsR |
| P0A7V0 | rluc_ecoli | rs2_ecoli  | rluC | rpsB |
| P0A7V0 | rluc_ecoli | rs2_ecoli  | rluC | rpsB |
| P0A7U7 | rluc_ecoli | rs20_ecoli | rluC | rpsT |
| P0A7V3 | rluc_ecoli | rs3_ecoli  | rluC | rpsC |
| P0A7V3 | rluc_ecoli | rs3_ecoli  | rluC | rpsC |
| P0A7V8 | rluc_ecoli | rs4_ecoli  | rluC | rpsD |
| P0A7W1 | rluc_ecoli | rs5_ecoli  | rluC | rpsE |
| P0A7W1 | rluc_ecoli | rs5_ecoli  | rluC | rpsE |
| P02358 | rluc_ecoli | rs6_ecoli  | rluC | rpsF |
| P02359 | rluc_ecoli | rs7_ecoli  | rluC | rpsG |
| P02359 | rluc_ecoli | rs7_ecoli  | rluC | rpsG |
| P02359 | rluc_ecoli | rs7_ecoli  | rluC | rpsG |
| P10408 | rluc_ecoli | seca_ecoli | rluC | secA |
| P0AG24 | rluc_ecoli | spot_ecoli | rluC | spoT |
| P21507 | rluc_ecoli | srmB_ecoli | rluC | srmB |
| P39177 | rluc_ecoli | uspg_ecoli | rluC | uspG |
| P0AAS7 | rluc_ecoli | ybcj_ecoli | rluC | ybcJ |
| P75828 | rluc_ecoli | ybjd_ecoli | rluC | ybjD |
| P31063 | rluc_ecoli | yedd_ecoli | rluC | yedD |
| P0AGJ5 | rluc_ecoli | yfif_ecoli | rluC | yfiF |
| P0AGJ5 | rluc_ecoli | yfif_ecoli | rluC | yfiF |
| P30871 | rluc_ecoli | ygif_ecoli | rluC | ygiF |
| P37634 | rluc_ecoli | yhir_ecoli | rluC | yhiR |
| P0ADK8 | rluc_ecoli | yibl_ecoli | rluC | yibL |
| P76116 | rluc_ecoli | ynce_ecoli | rluC | yncE |
| P76116 | rluc_ecoli | ynce_ecoli | rluC | yncE |

|        |             |            |       |      |
|--------|-------------|------------|-------|------|
| P0A6K3 | rmla1_ecoli | def_ecoli  | rmlA1 | def  |
| Q47129 | rmla1_ecoli | fear_ecoli | rmlA1 | feaR |
| P37595 | rmla1_ecoli | iaaa_ecoli | rmlA1 | iaaA |
| P18843 | rmla1_ecoli | nade_ecoli | rmlA1 | nadE |
| P28722 | rmla1_ecoli | yhca_ecoli | rmlA1 | yhca |

|        |             |            |      |      |
|--------|-------------|------------|------|------|
| P00722 | rmlb1_ecoli | bgal_ecoli | rfbB | lacZ |
| P18843 | rmlb1_ecoli | nade_ecoli | rfbB | nadE |
| P10908 | rmlb1_ecoli | ugpq_ecoli | rfbB | ugpQ |

|        |            |             |      |      |
|--------|------------|-------------|------|------|
| P0A6F5 | rmlc_ecoli | ch60_ecoli  | rfbC | groL |
| P0A6F5 | rmlc_ecoli | ch60_ecoli  | rfbC | groL |
| P64599 | rmlc_ecoli | yhbt_ecoli  | rfbC | yhbt |
| P37197 | rmlc_ecoli | yhja_ecoli  | rfbC | yhjA |
| P27550 | rnb_ecoli  | acsa_ecoli  | rnb  | acs  |
| P0A6M8 | rnb_ecoli  | efg_ecoli   | rnb  | fusA |
| P0A6Z3 | rnb_ecoli  | htpg_ecoli  | rnb  | htpG |
| P18843 | rnb_ecoli  | nade_ecoli  | rnb  | nadE |
| P0A7W1 | rnb_ecoli  | rs5_ecoli   | rnb  | rpsE |
| P00956 | rnb_ecoli  | syi_ecoli   | rnb  | ileS |
| P30136 | rnb_ecoli  | thic_ecoli  | rnb  | thiC |
| P0A6F5 | rnd_ecoli  | ch60_ecoli  | rnd  | groL |
| P0A9P6 | rne_ecoli  | dead_ecoli  | rne  | deaD |
| P0A9P6 | rne_ecoli  | dead_ecoli  | rne  | deaD |
| P0A6Y8 | rne_ecoli  | dnak_ecoli  | rne  | dnaK |
| P0A6Y8 | rne_ecoli  | dnak_ecoli  | rne  | dnaK |
| P0A6Y8 | rne_ecoli  | dnak_ecoli  | rne  | dnaK |
| P0A6Y8 | rne_ecoli  | dnak_ecoli  | rne  | dnaK |
| P0A6Y8 | rne_ecoli  | dnak_ecoli  | rne  | dnaK |
| P0A6Y8 | rne_ecoli  | dnak_ecoli  | rne  | dnaK |
| P0A6Y8 | rne_ecoli  | dnak_ecoli  | rne  | dnaK |
| P0A6Y8 | rne_ecoli  | dnak_ecoli  | rne  | dnaK |
| P37313 | rne_ecoli  | dppf_ecoli  | rne  | dppF |
| P0CE47 | rne_ecoli  | eftu1_ecoli | rne  | tufA |
| P0A6P9 | rne_ecoli  | eno_ecoli   | rne  | eno  |
| P0A6P9 | rne_ecoli  | eno_ecoli   | rne  | eno  |
| P0A6P9 | rne_ecoli  | eno_ecoli   | rne  | eno  |
| P0A6P9 | rne_ecoli  | eno_ecoli   | rne  | eno  |
| P0A6P9 | rne_ecoli  | eno_ecoli   | rne  | eno  |
| P0A6P9 | rne_ecoli  | eno_ecoli   | rne  | eno  |
| P0A6P9 | rne_ecoli  | eno_ecoli   | rne  | eno  |
| P0A6P9 | rne_ecoli  | eno_ecoli   | rne  | eno  |
| P0A6P9 | rne_ecoli  | eno_ecoli   | rne  | eno  |
| P0A6P9 | rne_ecoli  | eno_ecoli   | rne  | eno  |
| P0A6Q6 | rne_ecoli  | fabz_ecoli  | rne  | fabZ |
| P0ACP1 | rne_ecoli  | frur_ecoli  | rne  | fruR |
| P0A6X3 | rne_ecoli  | hfq_ecoli   | rne  | hfq  |
| P31069 | rne_ecoli  | kch_ecoli   | rne  | kch  |
| P31069 | rne_ecoli  | kch_ecoli   | rne  | kch  |



|        |           |             |     |      |
|--------|-----------|-------------|-----|------|
| P31069 | rne_ecoli | kch_ecoli   | rne | kch  |
| P31069 | rne_ecoli | kch_ecoli   | rne | kch  |
| P31069 | rne_ecoli | kch_ecoli   | rne | kch  |
| P31069 | rne_ecoli | kch_ecoli   | rne | kch  |
| P31069 | rne_ecoli | kch_ecoli   | rne | kch  |
| P77338 | rne_ecoli | kefa_ecoli  | rne | kefA |
| P77338 | rne_ecoli | kefa_ecoli  | rne | kefA |
| P77338 | rne_ecoli | kefa_ecoli  | rne | kefA |
| P77338 | rne_ecoli | kefa_ecoli  | rne | kefA |
| P77338 | rne_ecoli | kefa_ecoli  | rne | kefA |
| P77338 | rne_ecoli | kefa_ecoli  | rne | kefA |
| P77338 | rne_ecoli | kefa_ecoli  | rne | kefA |
| P52603 | rne_ecoli | klca2_ecolx | rne | klcA |
| P52603 | rne_ecoli | klca2_ecolx | rne | klcA |
| P52603 | rne_ecoli | klca2_ecolx | rne | klcA |
| P05055 | rne_ecoli | pnp_ecoli   | rne | pnp  |
| P05055 | rne_ecoli | pnp_ecoli   | rne | pnp  |
| P05055 | rne_ecoli | pnp_ecoli   | rne | pnp  |
| P05055 | rne_ecoli | pnp_ecoli   | rne | pnp  |
| P05055 | rne_ecoli | pnp_ecoli   | rne | pnp  |
| P05055 | rne_ecoli | pnp_ecoli   | rne | pnp  |
| P05055 | rne_ecoli | pnp_ecoli   | rne | pnp  |
| P05055 | rne_ecoli | pnp_ecoli   | rne | pnp  |
| POA8J8 | rne_ecoli | rhlb_ecoli  | rne | rhlB |
| POA8J8 | rne_ecoli | rhlb_ecoli  | rne | rhlB |
| POA8J8 | rne_ecoli | rhlb_ecoli  | rne | rhlB |
| POA8J8 | rne_ecoli | rhlb_ecoli  | rne | rhlB |
| POA8J8 | rne_ecoli | rhlb_ecoli  | rne | rhlB |
| POA8J8 | rne_ecoli | rhlb_ecoli  | rne | rhlB |
| POA8J8 | rne_ecoli | rhlb_ecoli  | rne | rhlB |
| POA8J8 | rne_ecoli | rhlb_ecoli  | rne | rhlB |
| POA8J8 | rne_ecoli | rhlb_ecoli  | rne | rhlB |
| POA8J8 | rne_ecoli | rhlb_ecoli  | rne | rhlB |
| POA7L0 | rne_ecoli | rl1_ecoli   | rne | rplA |
| POA7L0 | rne_ecoli | rl1_ecoli   | rne | rplA |
| POA7L0 | rne_ecoli | rl1_ecoli   | rne | rplA |
| POA7L0 | rne_ecoli | rl1_ecoli   | rne | rplA |
| POA7L0 | rne_ecoli | rl1_ecoli   | rne | rplA |
| POA7J7 | rne_ecoli | rl11_ecoli  | rne | rplK |
| POA7J7 | rne_ecoli | rl11_ecoli  | rne | rplK |
| POAA10 | rne_ecoli | rl13_ecoli  | rne | rplM |
| P02413 | rne_ecoli | rl15_ecoli  | rne | rplO |
| P02413 | rne_ecoli | rl15_ecoli  | rne | rplO |
| P60422 | rne_ecoli | rl2_ecoli   | rne | rplB |
| P60422 | rne_ecoli | rl2_ecoli   | rne | rplB |
| P60422 | rne_ecoli | rl2_ecoli   | rne | rplB |
| P60422 | rne_ecoli | rl2_ecoli   | rne | rplB |

|        |           |            |     |      |
|--------|-----------|------------|-----|------|
| P60422 | rne_ecoli | rl2_ecoli  | rne | rplB |
| P0AG48 | rne_ecoli | rl21_ecoli | rne | rplU |
| P61175 | rne_ecoli | rl22_ecoli | rne | rplV |
| P61175 | rne_ecoli | rl22_ecoli | rne | rplV |
| P0ADZ0 | rne_ecoli | rl23_ecoli | rne | rplW |
| P60624 | rne_ecoli | rl24_ecoli | rne | rplX |
| P0A7M2 | rne_ecoli | rl28_ecoli | rne | rpmB |
| P0A7M2 | rne_ecoli | rl28_ecoli | rne | rpmB |
| P60438 | rne_ecoli | rl3_ecoli  | rne | rplC |
| P60438 | rne_ecoli | rl3_ecoli  | rne | rplC |
| P60723 | rne_ecoli | rl4_ecoli  | rne | rplD |
| P60723 | rne_ecoli | rl4_ecoli  | rne | rplD |
| P0A7K2 | rne_ecoli | rl7_ecoli  | rne | rplL |
| P0A7R1 | rne_ecoli | rl9_ecoli  | rne | rplI |
| P0A7R1 | rne_ecoli | rl9_ecoli  | rne | rplI |
| P75864 | rne_ecoli | rlml_ecoli | rne | rlmL |
| P37765 | rne_ecoli | rlub_ecoli | rne | rluB |
| P21499 | rne_ecoli | rnrc_ecoli | rne | rnrc |
| P0A7R5 | rne_ecoli | rs10_ecoli | rne | rpsJ |
| P0A7T3 | rne_ecoli | rs16_ecoli | rne | rpsP |
| P0A7V0 | rne_ecoli | rs2_ecoli  | rne | rpsB |
| P0A7U7 | rne_ecoli | rs20_ecoli | rne | rpsT |
| P68679 | rne_ecoli | rs21_ecoli | rne | rpsU |
| P0A7V3 | rne_ecoli | rs3_ecoli  | rne | rpsC |
| P0A7V8 | rne_ecoli | rs4_ecoli  | rne | rpsD |
| P0A7V8 | rne_ecoli | rs4_ecoli  | rne | rpsD |
| P0A7W1 | rne_ecoli | rs5_ecoli  | rne | rpsE |
| P02358 | rne_ecoli | rs6_ecoli  | rne | rpsF |
| P02359 | rne_ecoli | rs7_ecoli  | rne | rpsG |
| P02359 | rne_ecoli | rs7_ecoli  | rne | rpsG |
| P77468 | rne_ecoli | sfmd_ecoli | rne | sfmD |
| P77468 | rne_ecoli | sfmd_ecoli | rne | sfmD |
| P77468 | rne_ecoli | sfmd_ecoli | rne | sfmD |
| P77468 | rne_ecoli | sfmd_ecoli | rne | sfmD |
| P77468 | rne_ecoli | sfmd_ecoli | rne | sfmD |
| P21507 | rne_ecoli | srmb_ecoli | rne | srmB |
| P33570 | rne_ecoli | tkt2_ecoli | rne | tktB |
| P33570 | rne_ecoli | tkt2_ecoli | rne | tktB |
| P33570 | rne_ecoli | tkt2_ecoli | rne | tktB |
| P33570 | rne_ecoli | tkt2_ecoli | rne | tktB |
| P33570 | rne_ecoli | tkt2_ecoli | rne | tktB |
| P33570 | rne_ecoli | tkt2_ecoli | rne | tktB |
| P33570 | rne_ecoli | tkt2_ecoli | rne | tktB |
| P0AB26 | rne_ecoli | yceb_ecoli | rne | yceB |
| P0AB26 | rne_ecoli | yceb_ecoli | rne | yceB |

|        |           |            |     |      |
|--------|-----------|------------|-----|------|
| P0AB26 | rne_ecoli | yceb_ecoli | rne | yceB |
| P75990 | rne_ecoli | ycgf_ecoli | rne | ycgF |
| P75990 | rne_ecoli | ycgf_ecoli | rne | ycgF |
| P75995 | rne_ecoli | ycgg_ecoli | rne | ycgG |
| P75995 | rne_ecoli | ycgg_ecoli | rne | ycgG |
| P75995 | rne_ecoli | ycgg_ecoli | rne | ycgG |
| P75995 | rne_ecoli | ycgg_ecoli | rne | ycgG |
| P75995 | rne_ecoli | ycgg_ecoli | rne | ycgG |
| P75995 | rne_ecoli | ycgg_ecoli | rne | ycgG |
| P75995 | rne_ecoli | ycgg_ecoli | rne | ycgG |
| P0AGJ5 | rne_ecoli | yfif_ecoli | rne | yfiF |
| P76594 | rne_ecoli | yfiq_ecoli | rne | yfiQ |
| P37641 | rne_ecoli | yhjc_ecoli | rne | yhjC |
| P37641 | rne_ecoli | yhjc_ecoli | rne | yhjC |
|        |           |            |     |      |
| P0A6Y8 | rng_ecoli | dnak_ecoli | rng | dnak |
| P0A6P9 | rng_ecoli | eno_ecoli  | rng | eno  |
| P15033 | rng_ecoli | racc_ecoli | rng | racC |
| P0AG44 | rng_ecoli | rl17_ecoli | rng | rplQ |
| P60422 | rng_ecoli | rl2_ecoli  | rng | rplB |
| P0AG07 | rng_ecoli | rpe_ecoli  | rng | rpe  |
| P0A7S9 | rng_ecoli | rs13_ecoli | rng | rpsM |
| P0ADZ4 | rng_ecoli | rs15_ecoli | rng | rpsO |
| P0A7U3 | rng_ecoli | rs19_ecoli | rng | rpsS |
| P0A7V0 | rng_ecoli | rs2_ecoli  | rng | rpsB |
| P0A7U7 | rng_ecoli | rs20_ecoli | rng | rpsT |
| P68679 | rng_ecoli | rs21_ecoli | rng | rpsU |
| P0A7V3 | rng_ecoli | rs3_ecoli  | rng | rpsC |
| P0A7V8 | rng_ecoli | rs4_ecoli  | rng | rpsD |
| P0A7W1 | rng_ecoli | rs5_ecoli  | rng | rpsE |
| P0A7X3 | rng_ecoli | rs9_ecoli  | rng | rpsI |
| P0A7X3 | rng_ecoli | rs9_ecoli  | rng | rpsI |
|        |           |            |     |      |
| P06961 | rnr_ecoli | cca_ecoli  | rnr | cca  |
| P0ACF0 | rnr_ecoli | dbha_ecoli | rnr | hupA |
| P0A9P6 | rnr_ecoli | dead_ecoli | rnr | deaD |
| P0A707 | rnr_ecoli | if3_ecoli  | rnr | infC |
| P0A6X7 | rnr_ecoli | ihfa_ecoli | rnr | ihfA |
| P32053 | rnr_ecoli | inta_ecoli | rnr | inta |
| P36938 | rnr_ecoli | pgm_ecoli  | rnr | pgm  |
| P23830 | rnr_ecoli | pss_ecoli  | rnr | pssA |
| P0A7L0 | rnr_ecoli | rl1_ecoli  | rnr | rplA |
| P0A7L0 | rnr_ecoli | rl1_ecoli  | rnr | rplA |

|        |           |            |     |      |
|--------|-----------|------------|-----|------|
| P0AA10 | rnr_ecoli | rl13_ecoli | rnr | rpIM |
| P0AA10 | rnr_ecoli | rl13_ecoli | rnr | rpIM |
| P0ADY3 | rnr_ecoli | rl14_ecoli | rnr | rpIN |
| P02413 | rnr_ecoli | rl15_ecoli | rnr | rpIO |
| P02413 | rnr_ecoli | rl15_ecoli | rnr | rpIO |
| P0ADY7 | rnr_ecoli | rl16_ecoli | rnr | rpIP |
| P60422 | rnr_ecoli | rl2_ecoli  | rnr | rpIB |
| P60422 | rnr_ecoli | rl2_ecoli  | rnr | rpIB |
| P0A7L3 | rnr_ecoli | rl20_ecoli | rnr | rpIT |
| P0AG48 | rnr_ecoli | rl21_ecoli | rnr | rpIU |
| P61175 | rnr_ecoli | rl22_ecoli | rnr | rpIV |
| P0ADZ0 | rnr_ecoli | rl23_ecoli | rnr | rpIW |
| P60624 | rnr_ecoli | rl24_ecoli | rnr | rpIX |
| P60438 | rnr_ecoli | rl3_ecoli  | rnr | rpIC |
| P60438 | rnr_ecoli | rl3_ecoli  | rnr | rpIC |
| P60723 | rnr_ecoli | rl4_ecoli  | rnr | rpID |
| P60723 | rnr_ecoli | rl4_ecoli  | rnr | rpID |
| P0AG55 | rnr_ecoli | rl6_ecoli  | rnr | rpIF |
| P0A7R1 | rnr_ecoli | rl9_ecoli  | rnr | rpII |
| P0A7R1 | rnr_ecoli | rl9_ecoli  | rnr | rpII |
| P75864 | rnr_ecoli | rlm1_ecoli | rnr | rlmL |
| P0AA39 | rnr_ecoli | rluc_ecoli | rnr | rluC |
| P0AG67 | rnr_ecoli | rs1_ecoli  | rnr | rpsA |
| P0A7R9 | rnr_ecoli | rs11_ecoli | rnr | rpsK |
| P0A7S9 | rnr_ecoli | rs13_ecoli | rnr | rpsM |
| P0A7S9 | rnr_ecoli | rs13_ecoli | rnr | rpsM |
| P0AG59 | rnr_ecoli | rs14_ecoli | rnr | rpsN |
| P0ADZ4 | rnr_ecoli | rs15_ecoli | rnr | rpsO |
| P0A7T3 | rnr_ecoli | rs16_ecoli | rnr | rpsP |
| P0A7T3 | rnr_ecoli | rs16_ecoli | rnr | rpsP |
| P0A7T7 | rnr_ecoli | rs18_ecoli | rnr | rpsR |
| P0A7V0 | rnr_ecoli | rs2_ecoli  | rnr | rpsB |
| P0A7V0 | rnr_ecoli | rs2_ecoli  | rnr | rpsB |
| P0A7U7 | rnr_ecoli | rs20_ecoli | rnr | rpsT |
| P68679 | rnr_ecoli | rs21_ecoli | rnr | rpsU |
| P0A7V3 | rnr_ecoli | rs3_ecoli  | rnr | rpsC |
| P0A7V8 | rnr_ecoli | rs4_ecoli  | rnr | rpsD |
| P0A7V8 | rnr_ecoli | rs4_ecoli  | rnr | rpsD |
| P0A7W1 | rnr_ecoli | rs5_ecoli  | rnr | rpsE |
| P0A7W1 | rnr_ecoli | rs5_ecoli  | rnr | rpsE |
| P02358 | rnr_ecoli | rs6_ecoli  | rnr | rpsF |
| P02358 | rnr_ecoli | rs6_ecoli  | rnr | rpsF |
| P02359 | rnr_ecoli | rs7_ecoli  | rnr | rpsG |
| P02359 | rnr_ecoli | rs7_ecoli  | rnr | rpsG |
| P0A7W7 | rnr_ecoli | rs8_ecoli  | rnr | rpsH |

|        |           |            |     |      |
|--------|-----------|------------|-----|------|
| P0A7X3 | rnr_ecoli | rs9_ecoli  | rnr | rpsI |
| P0A847 | rnr_ecoli | tgt_ecoli  | rnr | tgt  |
| P0AGJ5 | rnr_ecoli | yfif_ecoli | rnr | yfiF |
| P30871 | rnr_ecoli | ygif_ecoli | rnr | ygiF |

|        |            |            |      |      |
|--------|------------|------------|------|------|
| P0A9Y6 | rpoa_ecoli | cspc_ecoli | rpoA | cspC |
| P0ACF0 | rpoa_ecoli | dbha_ecoli | rpoA | hupA |
| P38134 | rpoa_ecoli | etk_ecoli  | rpoA | etk  |
| P0A9A9 | rpoa_ecoli | fur_ecoli  | rpoA | fur  |
| P0A6W5 | rpoa_ecoli | grea_ecoli | rpoA | greA |
| P30128 | rpoa_ecoli | greb_ecoli | rpoA | greB |
| P0AAN1 | rpoa_ecoli | hybe_ecoli | rpoA | hybE |
| P0A9X4 | rpoa_ecoli | mreb_ecoli | rpoA | mreB |
| P0AFF6 | rpoa_ecoli | nusa_ecoli | rpoA | nusA |
| P0AFF6 | rpoa_ecoli | nusa_ecoli | rpoA | nusA |
| P0AFG0 | rpoa_ecoli | nusg_ecoli | rpoA | nusG |
| P0AFG0 | rpoa_ecoli | nusg_ecoli | rpoA | nusG |
| P0AFG8 | rpoa_ecoli | odp1_ecoli | rpoA | aceE |
| P06959 | rpoa_ecoli | odp2_ecoli | rpoA | aceF |
| P23830 | rpoa_ecoli | pss_ecoli  | rpoA | pssA |
| P0A9M8 | rpoa_ecoli | pta_ecoli  | rpoA | pta  |
| P60240 | rpoa_ecoli | rapa_ecoli | rpoA | rapA |
| P60240 | rpoa_ecoli | rapa_ecoli | rpoA | rapA |
| P60240 | rpoa_ecoli | rapa_ecoli | rpoA | rapA |
| P0AG30 | rpoa_ecoli | rho_ecoli  | rpoA | rho  |
| P0A7L0 | rpoa_ecoli | rl1_ecoli  | rpoA | rpIA |
| P0AA10 | rpoa_ecoli | rl13_ecoli | rpoA | rpIM |
| P0AA10 | rpoa_ecoli | rl13_ecoli | rpoA | rpIM |
| P02413 | rpoa_ecoli | rl15_ecoli | rpoA | rpIO |
| P02413 | rpoa_ecoli | rl15_ecoli | rpoA | rpIO |
| P0ADY7 | rpoa_ecoli | rl16_ecoli | rpoA | rpIP |
| P0A7K6 | rpoa_ecoli | rl19_ecoli | rpoA | rpIS |
| P60422 | rpoa_ecoli | rl2_ecoli  | rpoA | rpIB |
| P60422 | rpoa_ecoli | rl2_ecoli  | rpoA | rpIB |
| P0AG48 | rpoa_ecoli | rl21_ecoli | rpoA | rpIU |
| P0ADZ0 | rpoa_ecoli | rl23_ecoli | rpoA | rpIW |
| P60624 | rpoa_ecoli | rl24_ecoli | rpoA | rpIX |
| P0A7L8 | rpoa_ecoli | rl27_ecoli | rpoA | rpmA |
| P0A7M2 | rpoa_ecoli | rl28_ecoli | rpoA | rpmB |
| P60438 | rpoa_ecoli | rl3_ecoli  | rpoA | rpIC |
| P0A7N9 | rpoa_ecoli | rl33_ecoli | rpoA | rpmG |

|        |            |            |      |      |
|--------|------------|------------|------|------|
| P60723 | rpoa_ecoli | rl4_ecoli  | rpoA | rpID |
| P60723 | rpoa_ecoli | rl4_ecoli  | rpoA | rpID |
| P62399 | rpoa_ecoli | rl5_ecoli  | rpoA | rpIE |
| P0AG55 | rpoa_ecoli | rl6_ecoli  | rpoA | rpIF |
| P0A7K2 | rpoa_ecoli | rl7_ecoli  | rpoA | rpIL |
| P0A8V2 | rpoa_ecoli | rpob_ecoli | rpoA | rpoB |
| P0A8V2 | rpoa_ecoli | rpob_ecoli | rpoA | rpoB |
| P0A8V2 | rpoa_ecoli | rpob_ecoli | rpoA | rpoB |
| P0A8V2 | rpoa_ecoli | rpob_ecoli | rpoA | rpoB |
| P0A8T7 | rpoa_ecoli | rpoc_ecoli | rpoA | rpoC |
| P0A8T7 | rpoa_ecoli | rpoc_ecoli | rpoA | rpoC |
| P0A8T7 | rpoa_ecoli | rpoc_ecoli | rpoA | rpoC |
| P0A8T7 | rpoa_ecoli | rpoc_ecoli | rpoA | rpoC |
| P00579 | rpoa_ecoli | rpod_ecoli | rpoA | rpoD |
| P00579 | rpoa_ecoli | rpod_ecoli | rpoA | rpoD |
| P00579 | rpoa_ecoli | rpod_ecoli | rpoA | rpoD |
| P0A800 | rpoa_ecoli | rpoz_ecoli | rpoA | rpoZ |
| P0A800 | rpoa_ecoli | rpoz_ecoli | rpoA | rpoZ |
| P0AG67 | rpoa_ecoli | rs1_ecoli  | rpoA | rpsA |
| P0A7R5 | rpoa_ecoli | rs10_ecoli | rpoA | rpsJ |
| P0A7S9 | rpoa_ecoli | rs13_ecoli | rpoA | rpsM |
| P0AG59 | rpoa_ecoli | rs14_ecoli | rpoA | rpsN |
| P0ADZ4 | rpoa_ecoli | rs15_ecoli | rpoA | rpsO |
| P0A7T3 | rpoa_ecoli | rs16_ecoli | rpoA | rpsP |
| P0A7U3 | rpoa_ecoli | rs19_ecoli | rpoA | rpsS |
| P0A7V0 | rpoa_ecoli | rs2_ecoli  | rpoA | rpsB |
| P0A7U7 | rpoa_ecoli | rs20_ecoli | rpoA | rpsT |
| P68679 | rpoa_ecoli | rs21_ecoli | rpoA | rpsU |
| P0A7V3 | rpoa_ecoli | rs3_ecoli  | rpoA | rpsC |
| P0A7V8 | rpoa_ecoli | rs4_ecoli  | rpoA | rpsD |
| P0A7V8 | rpoa_ecoli | rs4_ecoli  | rpoA | rpsD |
| P0A7W1 | rpoa_ecoli | rs5_ecoli  | rpoA | rpsE |
| P0A7W1 | rpoa_ecoli | rs5_ecoli  | rpoA | rpsE |
| P0A7W1 | rpoa_ecoli | rs5_ecoli  | rpoA | rpsE |
| P02358 | rpoa_ecoli | rs6_ecoli  | rpoA | rpsF |
| P02359 | rpoa_ecoli | rs7_ecoli  | rpoA | rpsG |
| P21889 | rpoa_ecoli | syd_ecoli  | rpoA | aspS |
| P21889 | rpoa_ecoli | syd_ecoli  | rpoA | aspS |
| P27242 | rpoa_ecoli | waau_ecoli | rpoA | waaU |
| P27836 | rpoa_ecoli | wecg_ecoli | rpoA | wecG |
|        |            |            |      |      |
| P0ABB4 | rpob_ecoli | atpb_ecoli | rpoB | atpD |
| P06961 | rpob_ecoli | cca_ecoli  | rpoB | cca  |
| P0ABH9 | rpob_ecoli | clpa_ecoli | rpoB | clpA |
| P0AAE0 | rpob_ecoli | cyca_ecoli | rpoB | cycA |

|        |                            |                             |      |      |
|--------|----------------------------|-----------------------------|------|------|
| P0A9F3 | <a href="#">rpob_ecoli</a> | <a href="#">cysb_ecoli</a>  | rpob | cysB |
| P0ACF0 | <a href="#">rpob_ecoli</a> | <a href="#">dbha_ecoli</a>  | rpob | hupA |
| P0ACF0 | <a href="#">rpob_ecoli</a> | <a href="#">dbha_ecoli</a>  | rpob | hupA |
| P0AC41 | <a href="#">rpob_ecoli</a> | <a href="#">dhsa_ecoli</a>  | rpob | sdhA |
| P0CE47 | <a href="#">rpob_ecoli</a> | <a href="#">eftu1_ecoli</a> | rpob | tufA |
| P76008 | <a href="#">rpob_ecoli</a> | <a href="#">ldca_ecoli</a>  | rpob | ldcA |
| P30958 | <a href="#">rpob_ecoli</a> | <a href="#">mfd_ecoli</a>   | rpob | mfd  |
| P30958 | <a href="#">rpob_ecoli</a> | <a href="#">mfd_ecoli</a>   | rpob | mfd  |
| P23367 | <a href="#">rpob_ecoli</a> | <a href="#">mutl_ecoli</a>  | rpob | mutL |
| P0AFF6 | <a href="#">rpob_ecoli</a> | <a href="#">nusa_ecoli</a>  | rpob | nusA |
| P0AFF6 | <a href="#">rpob_ecoli</a> | <a href="#">nusa_ecoli</a>  | rpob | nusA |
| P0AFG0 | <a href="#">rpob_ecoli</a> | <a href="#">nusg_ecoli</a>  | rpob | nusG |
| P0AFG0 | <a href="#">rpob_ecoli</a> | <a href="#">nusg_ecoli</a>  | rpob | nusG |
| P76773 | <a href="#">rpob_ecoli</a> | <a href="#">ompl_ecoli</a>  | rpob | ompl |
| P0AAH0 | <a href="#">rpob_ecoli</a> | <a href="#">pstb_ecoli</a>  | rpob | pstB |
| P60240 | <a href="#">rpob_ecoli</a> | <a href="#">rapa_ecoli</a>  | rpob | rapA |
| P0AG30 | <a href="#">rpob_ecoli</a> | <a href="#">rho_ecoli</a>   | rpob | rho  |
| P24211 | <a href="#">rpob_ecoli</a> | <a href="#">rhse_ecoli</a>  | rpob | rhsE |
| P25539 | <a href="#">rpob_ecoli</a> | <a href="#">ribd_ecoli</a>  | rpob | ribD |
| P0A7J7 | <a href="#">rpob_ecoli</a> | <a href="#">rl11_ecoli</a>  | rpob | rpIK |
| P60422 | <a href="#">rpob_ecoli</a> | <a href="#">rl2_ecoli</a>   | rpob | rpIB |
| P60422 | <a href="#">rpob_ecoli</a> | <a href="#">rl2_ecoli</a>   | rpob | rpIB |
| P61175 | <a href="#">rpob_ecoli</a> | <a href="#">rl22_ecoli</a>  | rpob | rpIV |
| P0A7N9 | <a href="#">rpob_ecoli</a> | <a href="#">rl33_ecoli</a>  | rpob | rpmG |
| P60723 | <a href="#">rpob_ecoli</a> | <a href="#">rl4_ecoli</a>   | rpob | rpID |
| P0A7K2 | <a href="#">rpob_ecoli</a> | <a href="#">rl7_ecoli</a>   | rpob | rpIL |
| P77611 | <a href="#">rpob_ecoli</a> | <a href="#">rnfc_ecoli</a>  | rpob | rnfC |
| P0AGB3 | <a href="#">rpob_ecoli</a> | <a href="#">rp32_ecoli</a>  | rpob | rpoH |
| P24255 | <a href="#">rpob_ecoli</a> | <a href="#">rp54_ecoli</a>  | rpob | rpoN |
| P0A7Z4 | <a href="#">rpob_ecoli</a> | <a href="#">rpoa_ecoli</a>  | rpob | rpoA |
| P0A7Z4 | <a href="#">rpob_ecoli</a> | <a href="#">rpoa_ecoli</a>  | rpob | rpoA |
| P0A8T7 | <a href="#">rpob_ecoli</a> | <a href="#">rpoc_ecoli</a>  | rpob | rpoC |
| P0A8T7 | <a href="#">rpob_ecoli</a> | <a href="#">rpoc_ecoli</a>  | rpob | rpoC |
| P0A8T7 | <a href="#">rpob_ecoli</a> | <a href="#">rpoc_ecoli</a>  | rpob | rpoC |
| P00579 | <a href="#">rpob_ecoli</a> | <a href="#">rpod_ecoli</a>  | rpob | rpoD |
| P00579 | <a href="#">rpob_ecoli</a> | <a href="#">rpod_ecoli</a>  | rpob | rpoD |
| P13445 | <a href="#">rpob_ecoli</a> | <a href="#">rpos_ecoli</a>  | rpob | rpoS |
| P0A800 | <a href="#">rpob_ecoli</a> | <a href="#">rpoz_ecoli</a>  | rpob | rpoZ |
| P0A800 | <a href="#">rpob_ecoli</a> | <a href="#">rpoz_ecoli</a>  | rpob | rpoZ |
| P0A7R5 | <a href="#">rpob_ecoli</a> | <a href="#">rs10_ecoli</a>  | rpob | rpsJ |
| P0A7R5 | <a href="#">rpob_ecoli</a> | <a href="#">rs10_ecoli</a>  | rpob | rpsJ |
| P0AG59 | <a href="#">rpob_ecoli</a> | <a href="#">rs14_ecoli</a>  | rpob | rpsN |
| P0A7U7 | <a href="#">rpob_ecoli</a> | <a href="#">rs20_ecoli</a>  | rpob | rpsT |
| P68679 | <a href="#">rpob_ecoli</a> | <a href="#">rs21_ecoli</a>  | rpob | rpsU |
| P0A7V3 | <a href="#">rpob_ecoli</a> | <a href="#">rs3_ecoli</a>   | rpob | rpsC |

|        |                            |                            |      |      |
|--------|----------------------------|----------------------------|------|------|
| P0A7W1 | <a href="#">rpob_ecoli</a> | <a href="#">rs5_ecoli</a>  | rpob | rpsE |
| P02358 | <a href="#">rpob_ecoli</a> | <a href="#">rs6_ecoli</a>  | rpob | rpsF |
| P10408 | <a href="#">rpob_ecoli</a> | <a href="#">seca_ecoli</a> | rpob | secA |
| P38684 | <a href="#">rpob_ecoli</a> | <a href="#">torr_ecoli</a> | rpob | torR |
| Q46814 | <a href="#">rpob_ecoli</a> | <a href="#">xdhd_ecoli</a> | rpob | xdhD |
| P0A8E5 | <a href="#">rpob_ecoli</a> | <a href="#">yacl_ecoli</a> | rpob | yacl |
| P75694 | <a href="#">rpob_ecoli</a> | <a href="#">yaho_ecoli</a> | rpob | yahO |
| P0A9U1 | <a href="#">rpob_ecoli</a> | <a href="#">ybhf_ecoli</a> | rpob | ybhF |
| P60872 | <a href="#">rpob_ecoli</a> | <a href="#">yide_ecoli</a> | rpob | yidE |
|        |                            |                            |      |      |
| P63284 | <a href="#">rpoc_ecoli</a> | <a href="#">clpb_ecoli</a> | rpoc | clpB |
| P22255 | <a href="#">rpoc_ecoli</a> | <a href="#">cysq_ecoli</a> | rpoc | cysQ |
| P0ACF0 | <a href="#">rpoc_ecoli</a> | <a href="#">dbha_ecoli</a> | rpoc | hupA |
| P0AC41 | <a href="#">rpoc_ecoli</a> | <a href="#">dhsa_ecoli</a> | rpoc | sdhA |
| P0A6Y8 | <a href="#">rpoc_ecoli</a> | <a href="#">dnak_ecoli</a> | rpoc | dnaK |
| P77609 | <a href="#">rpoc_ecoli</a> | <a href="#">flxa_ecoli</a> | rpoc | flxA |
| P0AC23 | <a href="#">rpoc_ecoli</a> | <a href="#">foca_ecoli</a> | rpoc | focA |
| P46889 | <a href="#">rpoc_ecoli</a> | <a href="#">ftsk_ecoli</a> | rpoc | ftsK |
| P30128 | <a href="#">rpoc_ecoli</a> | <a href="#">greb_ecoli</a> | rpoc | greB |
| P06983 | <a href="#">rpoc_ecoli</a> | <a href="#">hem3_ecoli</a> | rpoc | hemC |
| P0A6Z3 | <a href="#">rpoc_ecoli</a> | <a href="#">htpg_ecoli</a> | rpoc | htpG |
| P0A9M0 | <a href="#">rpoc_ecoli</a> | <a href="#">lon_ecoli</a>  | rpoc | lon  |
| P13009 | <a href="#">rpoc_ecoli</a> | <a href="#">meth_ecoli</a> | rpoc | metH |
| P0AFF6 | <a href="#">rpoc_ecoli</a> | <a href="#">nusa_ecoli</a> | rpoc | nusA |
| P0AFG0 | <a href="#">rpoc_ecoli</a> | <a href="#">nusg_ecoli</a> | rpoc | nusG |
| P0AFG0 | <a href="#">rpoc_ecoli</a> | <a href="#">nusg_ecoli</a> | rpoc | nusG |
| P00490 | <a href="#">rpoc_ecoli</a> | <a href="#">phsm_ecoli</a> | rpoc | malP |
| P17888 | <a href="#">rpoc_ecoli</a> | <a href="#">pria_ecoli</a> | rpoc | priA |
| P60240 | <a href="#">rpoc_ecoli</a> | <a href="#">rapa_ecoli</a> | rpoc | rapA |
| P60240 | <a href="#">rpoc_ecoli</a> | <a href="#">rapa_ecoli</a> | rpoc | rapA |
| P16919 | <a href="#">rpoc_ecoli</a> | <a href="#">rbsd_ecoli</a> | rpoc | rbsD |
| P0AA10 | <a href="#">rpoc_ecoli</a> | <a href="#">rl13_ecoli</a> | rpoc | rpIM |
| P02413 | <a href="#">rpoc_ecoli</a> | <a href="#">rl15_ecoli</a> | rpoc | rpIO |
| P0ADY7 | <a href="#">rpoc_ecoli</a> | <a href="#">rl16_ecoli</a> | rpoc | rpIP |
| P0AG44 | <a href="#">rpoc_ecoli</a> | <a href="#">rl17_ecoli</a> | rpoc | rpIQ |
| P0A7K6 | <a href="#">rpoc_ecoli</a> | <a href="#">rl19_ecoli</a> | rpoc | rpIS |
| P60422 | <a href="#">rpoc_ecoli</a> | <a href="#">rl2_ecoli</a>  | rpoc | rpIB |
| P60422 | <a href="#">rpoc_ecoli</a> | <a href="#">rl2_ecoli</a>  | rpoc | rpIB |
| P60422 | <a href="#">rpoc_ecoli</a> | <a href="#">rl2_ecoli</a>  | rpoc | rpIB |
| P61175 | <a href="#">rpoc_ecoli</a> | <a href="#">rl22_ecoli</a> | rpoc | rpIV |
| P60624 | <a href="#">rpoc_ecoli</a> | <a href="#">rl24_ecoli</a> | rpoc | rpIX |
| P60438 | <a href="#">rpoc_ecoli</a> | <a href="#">rl3_ecoli</a>  | rpoc | rpIC |
| P60438 | <a href="#">rpoc_ecoli</a> | <a href="#">rl3_ecoli</a>  | rpoc | rpIC |
| P60723 | <a href="#">rpoc_ecoli</a> | <a href="#">rl4_ecoli</a>  | rpoc | rpID |
| P0A7R1 | <a href="#">rpoc_ecoli</a> | <a href="#">rl9_ecoli</a>  | rpoc | rpII |



|        |                            |                             |      |      |
|--------|----------------------------|-----------------------------|------|------|
| P0A7Z4 | <a href="#">rpoc_ecoli</a> | <a href="#">rpoa_ecoli</a>  | rpoc | rpoA |
| P0A7Z4 | <a href="#">rpoc_ecoli</a> | <a href="#">rpoa_ecoli</a>  | rpoc | rpoA |
| P0A7Z4 | <a href="#">rpoc_ecoli</a> | <a href="#">rpoa_ecoli</a>  | rpoc | rpoA |
| P0A7Z4 | <a href="#">rpoc_ecoli</a> | <a href="#">rpoa_ecoli</a>  | rpoc | rpoA |
| P0A7Z4 | <a href="#">rpoc_ecoli</a> | <a href="#">rpoa_ecoli</a>  | rpoc | rpoA |
| P0A8V2 | <a href="#">rpoc_ecoli</a> | <a href="#">rpob_ecoli</a>  | rpoc | rpoB |
| P0A8V2 | <a href="#">rpoc_ecoli</a> | <a href="#">rpob_ecoli</a>  | rpoc | rpoB |
| P0A8V2 | <a href="#">rpoc_ecoli</a> | <a href="#">rpob_ecoli</a>  | rpoc | rpoB |
| P0A8V2 | <a href="#">rpoc_ecoli</a> | <a href="#">rpob_ecoli</a>  | rpoc | rpoB |
| P00579 | <a href="#">rpoc_ecoli</a> | <a href="#">rpod_ecoli</a>  | rpoc | rpoD |
| P00579 | <a href="#">rpoc_ecoli</a> | <a href="#">rpod_ecoli</a>  | rpoc | rpoD |
| P00579 | <a href="#">rpoc_ecoli</a> | <a href="#">rpod_ecoli</a>  | rpoc | rpoD |
| P00579 | <a href="#">rpoc_ecoli</a> | <a href="#">rpod_ecoli</a>  | rpoc | rpoD |
| P0A800 | <a href="#">rpoc_ecoli</a> | <a href="#">rpoz_ecoli</a>  | rpoc | rpoZ |
| P0A800 | <a href="#">rpoc_ecoli</a> | <a href="#">rpoz_ecoli</a>  | rpoc | rpoZ |
| P0AG67 | <a href="#">rpoc_ecoli</a> | <a href="#">rs1_ecoli</a>   | rpoc | rpsA |
| P0A7R5 | <a href="#">rpoc_ecoli</a> | <a href="#">rs10_ecoli</a>  | rpoc | rpsJ |
| P0A7S9 | <a href="#">rpoc_ecoli</a> | <a href="#">rs13_ecoli</a>  | rpoc | rpsM |
| P0A7T3 | <a href="#">rpoc_ecoli</a> | <a href="#">rs16_ecoli</a>  | rpoc | rpsP |
| P0A7V3 | <a href="#">rpoc_ecoli</a> | <a href="#">rs3_ecoli</a>   | rpoc | rpsC |
| P0A7V8 | <a href="#">rpoc_ecoli</a> | <a href="#">rs4_ecoli</a>   | rpoc | rpsD |
| P0A7V8 | <a href="#">rpoc_ecoli</a> | <a href="#">rs4_ecoli</a>   | rpoc | rpsD |
| P0A7W1 | <a href="#">rpoc_ecoli</a> | <a href="#">rs5_ecoli</a>   | rpoc | rpsE |
| P0A7W1 | <a href="#">rpoc_ecoli</a> | <a href="#">rs5_ecoli</a>   | rpoc | rpsE |
| P02359 | <a href="#">rpoc_ecoli</a> | <a href="#">rs7_ecoli</a>   | rpoc | rpsG |
| P02359 | <a href="#">rpoc_ecoli</a> | <a href="#">rs7_ecoli</a>   | rpoc | rpsG |
| P77324 | <a href="#">rpoc_ecoli</a> | <a href="#">yags_ecoli</a>  | rpoc | yagS |
| P75989 | <a href="#">rpoc_ecoli</a> | <a href="#">ycge_ecoli</a>  | rpoc | ycgE |
| Q47138 | <a href="#">rpoc_ecoli</a> | <a href="#">ydfc_ecoli</a>  | rpoc | ydfE |
| P0AA49 | <a href="#">rpoc_ecoli</a> | <a href="#">yfdv_ecoli</a>  | rpoc | yfdV |
| Q46906 | <a href="#">rpoc_ecoli</a> | <a href="#">ygcp_ecoli</a>  | rpoc | ygcP |
| P32689 | <a href="#">rpoc_ecoli</a> | <a href="#">yjbh_ecoli</a>  | rpoc | yjbH |
| P77759 | <a href="#">rpoc_ecoli</a> | <a href="#">ylbh_ecoli</a>  | rpoc | ylbH |
|        |                            |                             |      |      |
| P0ABD5 | <a href="#">rpod_ecoli</a> | <a href="#">acca_ecoli</a>  | rpod | accA |
| P0A901 | <a href="#">rpod_ecoli</a> | <a href="#">blc_ecoli</a>   | rpod | blc  |
| P0CE47 | <a href="#">rpod_ecoli</a> | <a href="#">eftu1_ecoli</a> | rpod | tufA |
| P37639 | <a href="#">rpod_ecoli</a> | <a href="#">gadx_ecoli</a>  | rpod | gadX |
| P63228 | <a href="#">rpod_ecoli</a> | <a href="#">gmhb_ecoli</a>  | rpod | gmhB |
| P0A705 | <a href="#">rpod_ecoli</a> | <a href="#">if2_ecoli</a>   | rpod | infB |
| P0A705 | <a href="#">rpod_ecoli</a> | <a href="#">if2_ecoli</a>   | rpod | infB |
| P77188 | <a href="#">rpod_ecoli</a> | <a href="#">matc_ecoli</a>  | rpod | matC |
| P30958 | <a href="#">rpod_ecoli</a> | <a href="#">mfd_ecoli</a>   | rpod | mfd  |
| P18843 | <a href="#">rpod_ecoli</a> | <a href="#">nade_ecoli</a>  | rpod | nadE |
| P0AFF6 | <a href="#">rpod_ecoli</a> | <a href="#">nusa_ecoli</a>  | rpod | nusA |

|        |            |            |      |      |
|--------|------------|------------|------|------|
| P0AFF6 | rpod_ecoli | nusa_ecoli | rpoD | nusA |
| P37095 | rpod_ecoli | pepb_ecoli | rpoD | pepB |
| P0AFK9 | rpod_ecoli | potd_ecoli | rpoD | potD |
| P0ABS5 | rpod_ecoli | prim_ecoli | rpoD | dnaG |
| P0AG30 | rpod_ecoli | rho_ecoli  | rpoD | rho  |
| P0AG30 | rpod_ecoli | rho_ecoli  | rpoD | rho  |
| P0A7L0 | rpod_ecoli | rl1_ecoli  | rpoD | rplA |
| P0A7L0 | rpod_ecoli | rl1_ecoli  | rpoD | rplA |
| P02413 | rpod_ecoli | rl15_ecoli | rpoD | rplO |
| P0A7K6 | rpod_ecoli | rl19_ecoli | rpoD | rplS |
| P60422 | rpod_ecoli | rl2_ecoli  | rpoD | rplB |
| P0AG48 | rpod_ecoli | rl21_ecoli | rpoD | rplU |
| P61175 | rpod_ecoli | rl22_ecoli | rpoD | rplV |
| P0A7M2 | rpod_ecoli | rl28_ecoli | rpoD | rpmB |
| P60723 | rpod_ecoli | rl4_ecoli  | rpoD | rplD |
| P60723 | rpod_ecoli | rl4_ecoli  | rpoD | rplD |
| P60723 | rpod_ecoli | rl4_ecoli  | rpoD | rplD |
| P62399 | rpod_ecoli | rl5_ecoli  | rpoD | rplE |
| P0A7K2 | rpod_ecoli | rl7_ecoli  | rpoD | rplL |
| P0A7Z4 | rpod_ecoli | rpoa_ecoli | rpoD | rpoA |
| P0A7Z4 | rpod_ecoli | rpoa_ecoli | rpoD | rpoA |
| P0A8V2 | rpod_ecoli | rpob_ecoli | rpoD | rpoB |
| P0A8V2 | rpod_ecoli | rpob_ecoli | rpoD | rpoB |
| P0A8V2 | rpod_ecoli | rpob_ecoli | rpoD | rpoB |
| P0A8T7 | rpod_ecoli | rpoc_ecoli | rpoD | rpoC |
| P0A8T7 | rpod_ecoli | rpoc_ecoli | rpoD | rpoC |
| P0A8T7 | rpod_ecoli | rpoc_ecoli | rpoD | rpoC |
| P0A8T7 | rpod_ecoli | rpoc_ecoli | rpoD | rpoC |
| P0A800 | rpod_ecoli | rpoz_ecoli | rpoD | rpoZ |
| P0A800 | rpod_ecoli | rpoz_ecoli | rpoD | rpoZ |
| P0AG67 | rpod_ecoli | rs1_ecoli  | rpoD | rpsA |
| P0A7V0 | rpod_ecoli | rs2_ecoli  | rpoD | rpsB |
| P0A7V0 | rpod_ecoli | rs2_ecoli  | rpoD | rpsB |
| P0A7V3 | rpod_ecoli | rs3_ecoli  | rpoD | rpsC |
| P0A7V8 | rpod_ecoli | rs4_ecoli  | rpoD | rpsD |
| P0A7W1 | rpod_ecoli | rs5_ecoli  | rpoD | rpsE |
| P02358 | rpod_ecoli | rs6_ecoli  | rpoD | rpsF |
| P02359 | rpod_ecoli | rs7_ecoli  | rpoD | rpsG |
| P02359 | rpod_ecoli | rs7_ecoli  | rpoD | rpsG |
| P0AFX4 | rpod_ecoli | rsd_ecoli  | rpoD | rsd  |
| P0A8M6 | rpod_ecoli | yeex_ecoli | rpoD | yeeX |
| P76464 | rpod_ecoli | yfas_ecoli | rpoD | yfaS |
| P77247 | rpod_ecoli | ynic_ecoli | rpoD | yniC |
| P0A6F5 | rpph_ecoli | ch60_ecoli | rppH | groL |

|        |            |            |      |      |
|--------|------------|------------|------|------|
| P0A6K1 | rpph_ecoli | dapf_ecoli | rppH | dapF |
| P0A6K1 | rpph_ecoli | dapf_ecoli | rppH | dapF |
| P0ACF0 | rpph_ecoli | dbha_ecoli | rppH | hupA |
| P0A9P6 | rpph_ecoli | dead_ecoli | rppH | deaD |
| P0A7L0 | rpph_ecoli | rl1_ecoli  | rppH | rplA |
| P0A7L0 | rpph_ecoli | rl1_ecoli  | rppH | rplA |
| P0A7J3 | rpph_ecoli | rl10_ecoli | rppH | rplJ |
| P0AA10 | rpph_ecoli | rl13_ecoli | rppH | rplM |
| P0AA10 | rpph_ecoli | rl13_ecoli | rppH | rplM |
| P0ADY3 | rpph_ecoli | rl14_ecoli | rppH | rplN |
| P02413 | rpph_ecoli | rl15_ecoli | rppH | rplO |
| P02413 | rpph_ecoli | rl15_ecoli | rppH | rplO |
| P0ADY7 | rpph_ecoli | rl16_ecoli | rppH | rplP |
| P0AG44 | rpph_ecoli | rl17_ecoli | rppH | rplQ |
| P0AG44 | rpph_ecoli | rl17_ecoli | rppH | rplQ |
| P0C018 | rpph_ecoli | rl18_ecoli | rppH | rplR |
| P0C018 | rpph_ecoli | rl18_ecoli | rppH | rplR |
| P0A7K6 | rpph_ecoli | rl19_ecoli | rppH | rplS |
| P0A7K6 | rpph_ecoli | rl19_ecoli | rppH | rplS |
| P60422 | rpph_ecoli | rl2_ecoli  | rppH | rplB |
| P60422 | rpph_ecoli | rl2_ecoli  | rppH | rplB |
| P60422 | rpph_ecoli | rl2_ecoli  | rppH | rplB |
| P0A7L3 | rpph_ecoli | rl20_ecoli | rppH | rplT |
| P0AG48 | rpph_ecoli | rl21_ecoli | rppH | rplU |
| P61175 | rpph_ecoli | rl22_ecoli | rppH | rplV |
| P61175 | rpph_ecoli | rl22_ecoli | rppH | rplV |
| P60624 | rpph_ecoli | rl24_ecoli | rppH | rplX |
| P68919 | rpph_ecoli | rl25_ecoli | rppH | rplY |
| P0A7M2 | rpph_ecoli | rl28_ecoli | rppH | rpmB |
| P60438 | rpph_ecoli | rl3_ecoli  | rppH | rplC |
| P60438 | rpph_ecoli | rl3_ecoli  | rppH | rplC |
| P60438 | rpph_ecoli | rl3_ecoli  | rppH | rplC |
| P60723 | rpph_ecoli | rl4_ecoli  | rppH | rplD |
| P60723 | rpph_ecoli | rl4_ecoli  | rppH | rplD |
| P62399 | rpph_ecoli | rl5_ecoli  | rppH | rplE |
| P0AG55 | rpph_ecoli | rl6_ecoli  | rppH | rplF |
| P0AG55 | rpph_ecoli | rl6_ecoli  | rppH | rplF |
| P0A7R1 | rpph_ecoli | rl9_ecoli  | rppH | rplI |
| P0A7R1 | rpph_ecoli | rl9_ecoli  | rppH | rplI |
| P75864 | rpph_ecoli | rlml_ecoli | rppH | rlmL |
| P37765 | rpph_ecoli | rlub_ecoli | rppH | rluB |
| P0AA39 | rpph_ecoli | rluc_ecoli | rppH | rluC |
| P21499 | rpph_ecoli | rnrc_ecoli | rppH | rnrc |
| P0AG67 | rpph_ecoli | rs1_ecoli  | rppH | rpsA |
| P0AG67 | rpph_ecoli | rs1_ecoli  | rppH | rpsA |

|        |            |            |      |      |
|--------|------------|------------|------|------|
| P0A7S9 | rpph_ecoli | rs13_ecoli | rppH | rpsM |
| P0A7S9 | rpph_ecoli | rs13_ecoli | rppH | rpsM |
| P0A7T7 | rpph_ecoli | rs18_ecoli | rppH | rpsR |
| P0A7U3 | rpph_ecoli | rs19_ecoli | rppH | rpsS |
| P0A7V0 | rpph_ecoli | rs2_ecoli  | rppH | rpsB |
| P0A7V0 | rpph_ecoli | rs2_ecoli  | rppH | rpsB |
| P0A7U7 | rpph_ecoli | rs20_ecoli | rppH | rpsT |
| P0A7V3 | rpph_ecoli | rs3_ecoli  | rppH | rpsC |
| P0A7V8 | rpph_ecoli | rs4_ecoli  | rppH | rpsD |
| P0A7V8 | rpph_ecoli | rs4_ecoli  | rppH | rpsD |
| P0A7W1 | rpph_ecoli | rs5_ecoli  | rppH | rpsE |
| P0A7W1 | rpph_ecoli | rs5_ecoli  | rppH | rpsE |
| P02358 | rpph_ecoli | rs6_ecoli  | rppH | rpsF |
| P02359 | rpph_ecoli | rs7_ecoli  | rppH | rpsG |
| P02359 | rpph_ecoli | rs7_ecoli  | rppH | rpsG |
| P0A7X3 | rpph_ecoli | rs9_ecoli  | rppH | rpsI |
| P46850 | rpph_ecoli | rtcb_ecoli | rppH | rtcB |
| P0A9K9 | rpph_ecoli | slyd_ecoli | rppH | slyD |
| P0AG24 | rpph_ecoli | spot_ecoli | rppH | spoT |
| P21507 | rpph_ecoli | srmb_ecoli | rppH | srmB |
| P23841 | rpph_ecoli | xapr_ecoli | rppH | xapR |
| P0A8E7 | rpph_ecoli | yajq_ecoli | rppH | yajQ |
| P0ACM2 | rpph_ecoli | ydfh_ecoli | rppH | ydfH |
| P76154 | rpph_ecoli | ydfk_ecoli | rppH | ydfK |
| P0AGJ5 | rpph_ecoli | yfif_ecoli | rppH | yfiF |
| P0AGJ5 | rpph_ecoli | yfif_ecoli | rppH | yfiF |
| P76073 | rpph_ecoli | ynae_ecoli | rppH | ynaE |
|        |            |            |      |      |
| P35340 | rrea_ecoli | ahpf_ecoli | rraA | ahpF |
| P37028 | rrea_ecoli | btuf_ecoli | rraA | btuF |
| P0A6B7 | rrea_ecoli | iscs_ecoli | rraA | iscS |
| P63386 | rrea_ecoli | mlaf_ecoli | rraA | mlaF |
| P33345 | rrea_ecoli | molr_ecoli | rraA | yehH |
| P0AG44 | rrea_ecoli | rl17_ecoli | rraA | rplQ |
| P76403 | rrea_ecoli | yegq_ecoli | rraA | yegQ |
| P33343 | rrea_ecoli | yehd_ecoli | rraA | yehD |
|        |            |            |      |      |
| P45568 | rrf_ecoli  | dxr_ecoli  | frr  | dxr  |
| P75905 | rrf_ecoli  | pgac_ecoli | frr  | pgaC |
| P77718 | rrf_ecoli  | thii_ecoli | frr  | thiI |
|        |            |            |      |      |
| P36548 | rs1_ecoli  | amia_ecoli | rpsA | amiA |
| P77188 | rs1_ecoli  | matc_ecoli | rpsA | matC |
| P0A738 | rs1_ecoli  | moac_ecoli | rpsA | moaC |
| P76773 | rs1_ecoli  | ompl_ecoli | rpsA | ompL |

|        |                            |                            |      |      |
|--------|----------------------------|----------------------------|------|------|
| P0A9K9 | <a href="#">rs1_ecoli</a>  | <a href="#">slyd_ecoli</a> | rpsA | slyD |
| P76512 | rs1_ecoli                  | yfdp_ecoli                 | rpsA | yfdP |
| P0A780 | <a href="#">rs10_ecoli</a> | <a href="#">nusb_ecoli</a> | rpsJ | nusB |
| P0A780 | <a href="#">rs10_ecoli</a> | <a href="#">nusb_ecoli</a> | rpsJ | nusB |
| P0A780 | <a href="#">rs10_ecoli</a> | <a href="#">nusb_ecoli</a> | rpsJ | nusB |
| P0A986 | rs12_ecoli                 | cspl_ecoli                 | rpsL | cspl |
| P0ACF8 | <a href="#">rs12_ecoli</a> | <a href="#">hns_ecoli</a>  | rpsL | hns  |
| P0AB43 | rs12_ecoli                 | ycgl_ecoli                 | rpsL | ycgL |
| P46125 | rs12_ecoli                 | yedi_ecoli                 | rpsL | yedI |
| P76321 | <a href="#">rs12_ecoli</a> | <a href="#">yedn_ecoli</a> | rpsL | yedN |
| P75989 | rs13_ecoli                 | ycge_ecoli                 | rpsM | ycgE |
| P65643 | rs14_ecoli                 | eutt_ecoli                 | rpsN | eutT |
| P0C077 | rs14_ecoli                 | rele_ecoli                 | rpsN | reLE |
| P0AD53 | <a href="#">rs14_ecoli</a> | <a href="#">ygac_ecoli</a> | rpsN | ygaC |
| P39295 | rs14_ecoli                 | yjfm_ecoli                 | rpsN | yjFM |
| P36548 | <a href="#">rs15_ecoli</a> | <a href="#">amia_ecoli</a> | rpsO | amiA |
| P69228 | rs15_ecoli                 | baer_ecoli                 | rpsO | baeR |
| P33345 | <a href="#">rs15_ecoli</a> | <a href="#">molr_ecoli</a> | rpsO | yehH |
| P18843 | <a href="#">rs15_ecoli</a> | <a href="#">nade_ecoli</a> | rpsO | nadE |
| P39306 | rs15_ecoli                 | ulaf_ecoli                 | rpsO | ulaF |
| P75989 | rs15_ecoli                 | ycge_ecoli                 | rpsO | ycgE |
| P06611 | rs16_ecoli                 | btud_ecoli                 | rpsP | btuD |
| P0A6Y8 | <a href="#">rs16_ecoli</a> | <a href="#">dnak_ecoli</a> | rpsP | dnaK |
| P77188 | rs16_ecoli                 | matc_ecoli                 | rpsP | matC |
| P18843 | <a href="#">rs16_ecoli</a> | <a href="#">nade_ecoli</a> | rpsP | nadE |
| Q47157 | rs18_ecoli                 | yafo_ecoli                 | rpsR | yafO |
| P08245 | rs18_ecoli                 | ycih_ecoli                 | rpsR | yciH |
| P0ABZ1 | rs19_ecoli                 | flig_ecoli                 | rpsS | fliG |
| P32662 | rs19_ecoli                 | gph_ecoli                  | rpsS | gph  |
| P0AGB6 | rs19_ecoli                 | rpoe_ecoli                 | rpsS | rpoE |
| P0AC41 | <a href="#">rs2_ecoli</a>  | <a href="#">dhsa_ecoli</a> | rpsB | sdhA |
| P0A6Z3 | <a href="#">rs2_ecoli</a>  | <a href="#">htpg_ecoli</a> | rpsB | htpG |

|        |            |            |      |       |
|--------|------------|------------|------|-------|
| P15977 | rs2_ecoli  | malq_ecoli | rpsB | malQ  |
| P76073 | rs3_ecoli  | ynae_ecoli | rpsC | ynaE  |
| P23882 | rs4_ecoli  | fmt_ecoli  | rpsD | fmt   |
| P0AFG0 | rs4_ecoli  | nusg_ecoli | rpsD | nusG  |
| P0A8I8 | rs4_ecoli  | rlmh_ecoli | rpsD | rlmH  |
| P75869 | rs4_ecoli  | sxy_ecoli  | rpsD | sxy   |
| Q47157 | rs4_ecoli  | yafo_ecoli | rpsD | yafO  |
| P30176 | rs4_ecoli  | ybia_ecoli | rpsD | ybiA  |
| P75989 | rs4_ecoli  | ycge_ecoli | rpsD | ycgE  |
| P76154 | rs4_ecoli  | ydfk_ecoli | rpsD | ydfK  |
| P64574 | rs4_ecoli  | yghw_ecoli | rpsD | yghW  |
| P76073 | rs4_ecoli  | ynae_ecoli | rpsD | ynaE  |
| P0AES4 | rs5_ecoli  | gyra_ecoli | rpsE | gyrA  |
| P0AES6 | rs5_ecoli  | gyrb_ecoli | rpsE | gyrB  |
| P38489 | rs5_ecoli  | nfnb_ecoli | rpsE | nfnB  |
| P0A8D0 | rs5_ecoli  | nrdR_ecoli | rpsE | nrdR  |
| P0C0U4 | rs5_ecoli  | rimk_ecoli | rpsE | rimK  |
| P76154 | rs5_ecoli  | ydfk_ecoli | rpsE | ydfK  |
| P76073 | rs5_ecoli  | ynae_ecoli | rpsE | ynaE  |
| P33368 | rs5_ecoli  | yohf_ecoli | rpsE | yohF  |
| P0A6Y8 | rs6_ecoli  | dnak_ecoli | rpsF | dnaK  |
| P0A6U3 | rs6_ecoli  | mnmg_ecoli | rpsF | mnmgG |
| P0A8M3 | rs6_ecoli  | syt_ecoli  | rpsF | thrS  |
| P69820 | rs6_ecoli  | ulac_ecoli | rpsF | ulaC  |
| P0A8M6 | rs6_ecoli  | yeex_ecoli | rpsF | yeeX  |
| P33644 | rs6_ecoli  | yfiH_ecoli | rpsF | yfiH  |
| P0A850 | rs7_ecoli  | tig_ecoli  | rpsG | tig   |
| P0A8I8 | rs8_ecoli  | rlmh_ecoli | rpsH | rlmH  |
| P09184 | rs8_ecoli  | vsr_ecoli  | rpsH | vsr   |
| P0A8I8 | rs9_ecoli  | rlmh_ecoli | rpsI | rlmH  |
| P08245 | rs9_ecoli  | yciH_ecoli | rpsI | yciH  |
| P64574 | rs9_ecoli  | yghw_ecoli | rpsI | yghW  |
| P0A6F5 | rsma_ecoli | ch60_ecoli | rsmA | groL  |

|        |                            |                             |      |      |
|--------|----------------------------|-----------------------------|------|------|
| P04079 | <a href="#">rsma_ecoli</a> | <a href="#">guaa_ecoli</a>  | rsmA | guaA |
| P08373 | <a href="#">rsma_ecoli</a> | <a href="#">murb_ecoli</a>  | rsmA | murB |
| P16682 | <a href="#">rsmb_ecoli</a> | <a href="#">phnd_ecoli</a>  | rsmB | phnD |
| P0AG44 | <a href="#">rsmb_ecoli</a> | <a href="#">rl17_ecoli</a>  | rsmB | rplQ |
| P60422 | <a href="#">rsmb_ecoli</a> | <a href="#">rl2_ecoli</a>   | rsmB | rplB |
| P60438 | <a href="#">rsmb_ecoli</a> | <a href="#">rl3_ecoli</a>   | rsmB | rplC |
| P60723 | <a href="#">rsmb_ecoli</a> | <a href="#">rl4_ecoli</a>   | rsmB | rplD |
| P0A7V8 | <a href="#">rsmb_ecoli</a> | <a href="#">rs4_ecoli</a>   | rsmB | rpsD |
| P02359 | <a href="#">rsmb_ecoli</a> | <a href="#">rs7_ecoli</a>   | rsmB | rpsG |
| P0A7X3 | <a href="#">rsmb_ecoli</a> | <a href="#">rs9_ecoli</a>   | rsmB | rpsI |
| P06612 | <a href="#">rsmb_ecoli</a> | <a href="#">top1_ecoli</a>  | rsmB | topA |
| P76154 | <a href="#">rsmb_ecoli</a> | <a href="#">ydfk_ecoli</a>  | rsmB | ydfK |
| P75804 | <a href="#">rsmb_ecoli</a> | <a href="#">ylii_ecoli</a>  | rsmB | ylil |
| P76073 | <a href="#">rsmb_ecoli</a> | <a href="#">ynae_ecoli</a>  | rsmB | ynaE |
| P0ACD8 | <a href="#">rsmc_ecoli</a> | <a href="#">mbhl_ecoli</a>  | rsmC | hyaB |
| P18843 | <a href="#">rsmc_ecoli</a> | <a href="#">nade_ecoli</a>  | rsmC | nadE |
| P60422 | <a href="#">rsmc_ecoli</a> | <a href="#">rl2_ecoli</a>   | rsmC | rplB |
| P60723 | <a href="#">rsmc_ecoli</a> | <a href="#">rl4_ecoli</a>   | rsmC | rplD |
| P0A7S9 | <a href="#">rsmc_ecoli</a> | <a href="#">rs13_ecoli</a>  | rsmC | rpsM |
| P0A7V3 | <a href="#">rsmc_ecoli</a> | <a href="#">rs3_ecoli</a>   | rsmC | rpsC |
| P0A7V8 | <a href="#">rsmc_ecoli</a> | <a href="#">rs4_ecoli</a>   | rsmC | rpsD |
| P02359 | <a href="#">rsmc_ecoli</a> | <a href="#">rs7_ecoli</a>   | rsmC | rpsG |
| P0A7X3 | <a href="#">rsmc_ecoli</a> | <a href="#">rs9_ecoli</a>   | rsmC | rpsI |
| P0A8F4 | <a href="#">rsmc_ecoli</a> | <a href="#">urk_ecoli</a>   | rsmC | udk  |
| P75989 | <a href="#">rsmc_ecoli</a> | <a href="#">ycge_ecoli</a>  | rsmC | ycgE |
| P08245 | <a href="#">rsmc_ecoli</a> | <a href="#">ycih_ecoli</a>  | rsmC | yciH |
| P0A6Y8 | <a href="#">rsmd_ecoli</a> | <a href="#">dnak_ecoli</a>  | rsmD | dnaK |
| P0CE47 | <a href="#">rsmd_ecoli</a> | <a href="#">eftu1_ecoli</a> | rsmD | tufA |
| P0ACL7 | <a href="#">rsmd_ecoli</a> | <a href="#">lldr_ecoli</a>  | rsmD | lldR |
| P0A915 | <a href="#">rsmd_ecoli</a> | <a href="#">ompw_ecoli</a>  | rsmD | ompW |
| P60422 | <a href="#">rsmd_ecoli</a> | <a href="#">rl2_ecoli</a>   | rsmD | rplB |
| P0AG44 | <a href="#">rsme_ecoli</a> | <a href="#">rl17_ecoli</a>  | rsmE | rplQ |
| P0A7V8 | <a href="#">rsme_ecoli</a> | <a href="#">rs4_ecoli</a>   | rsmE | rpsD |
| P0A9K9 | <a href="#">rsme_ecoli</a> | <a href="#">slyd_ecoli</a>  | rsmE | slyD |
| P75792 | <a href="#">rsme_ecoli</a> | <a href="#">suph_ecoli</a>  | rsmE | supH |
| P0A717 | <a href="#">rsmh_ecoli</a> | <a href="#">kprs_ecoli</a>  | rsmH | prs  |
| P60438 | <a href="#">rsmh_ecoli</a> | <a href="#">rl3_ecoli</a>   | rsmH | rplC |
| P0A7K2 | <a href="#">rsmh_ecoli</a> | <a href="#">rl7_ecoli</a>   | rsmH | rplL |

|        |            |            |      |      |
|--------|------------|------------|------|------|
| P0A7R5 | rsmh_ecoli | rs10_ecoli | rsmH | rpsJ |
| P06959 | rsmi_ecoli | odp2_ecoli | rsmI | aceF |
| P0A7V8 | rsmi_ecoli | rs4_ecoli  | rsmI | rpsD |
| P45545 | rsmi_ecoli | yhfs_ecoli | rsmI | yhfS |
| P0A6F5 | rsta_ecoli | ch60_ecoli | rstA | groL |
| P0AC55 | rsta_ecoli | glnk_ecoli | rstA | glnK |
| P31658 | rsta_ecoli | hcha_ecoli | rstA | hchA |
| P0A717 | rsta_ecoli | kprs_ecoli | rstA | prs  |
| P36999 | rsta_ecoli | rlma_ecoli | rstA | rlmA |
| P39177 | rsta_ecoli | uspg_ecoli | rstA | uspG |
| P0AD35 | rsta_ecoli | yfdo_ecoli | rstA | yfdO |
| P36677 | rsta_ecoli | yhdn_ecoli | rstA | yhdN |
| P75977 | rsta_ecoli | ymfm_ecoli | rstA | ymfM |
| P30128 | rsua_ecoli | greb_ecoli | rsuA | greB |
| P0A7R5 | rsua_ecoli | rs10_ecoli | rsuA | rpsJ |
| P0A7R5 | rsua_ecoli | rs10_ecoli | rsuA | rpsJ |
| P0A7S9 | rsua_ecoli | rs13_ecoli | rsuA | rpsM |
| P0A7T3 | rsua_ecoli | rs16_ecoli | rsuA | rpsP |
| P0A7V0 | rsua_ecoli | rs2_ecoli  | rsuA | rpsB |
| P0A7V8 | rsua_ecoli | rs4_ecoli  | rsuA | rpsD |
| P0A7X3 | rsua_ecoli | rs9_ecoli  | rsuA | rpsI |
| P0A8R7 | rsua_ecoli | ycjf_ecoli | rsuA | ycjF |
| P65807 | rsua_ecoli | ygey_ecoli | rsuA | ygeY |
| P05052 | rumb_ecoli | appy_ecoli | rumB | appY |
| P0A6F5 | rumb_ecoli | ch60_ecoli | rumB | groL |
| P18843 | rumb_ecoli | nade_ecoli | rumB | nadE |
| P09377 | rumb_ecoli | rhas_ecoli | rumB | rhaS |
| P0A7L0 | rumb_ecoli | rl1_ecoli  | rumB | rplA |
| P60422 | rumb_ecoli | rl2_ecoli  | rumB | rplB |
| P08245 | rumb_ecoli | ycih_ecoli | rumB | yciH |
| P24251 | ruva_ecoli | crl_ecoli  | ruvA | crl  |
| P18843 | ruva_ecoli | nade_ecoli | ruvA | nadE |
| P0ADZ0 | ruva_ecoli | rl23_ecoli | ruvA | rplW |
| P68398 | ruva_ecoli | tada_ecoli | ruvA | tadA |
| P0A843 | ruva_ecoli | tate_ecoli | ruvA | tatE |
| P0A6F5 | sapd_ecoli | ch60_ecoli | sapD | groL |
| P77779 | sapd_ecoli | ybfo_ecoli | sapD | ybfO |



|        |                            |                              |      |      |
|--------|----------------------------|------------------------------|------|------|
| P0AC53 | <a href="#">sdhl_ecoli</a> | <a href="#">g6pd_ecoli</a>   | sdaA | zwf  |
| P77243 | <a href="#">sdhl_ecoli</a> | <a href="#">prpd_ecoli</a>   | sdaA | prpD |
| P77649 | <a href="#">sdhl_ecoli</a> | <a href="#">ydiu_ecoli</a>   | sdaA | ydiU |
| P0A901 | <a href="#">sdhm_ecoli</a> | <a href="#">blc_ecoli</a>    | sdaB | blc  |
| P31119 | <a href="#">seca_ecoli</a> | <a href="#">aas_ecoli</a>    | secA | aas  |
| P12996 | <a href="#">seca_ecoli</a> | <a href="#">biob_ecoli</a>   | secA | bioB |
| P0A6Y8 | <a href="#">seca_ecoli</a> | <a href="#">dnak_ecoli</a>   | secA | dnaK |
| POCE47 | <a href="#">seca_ecoli</a> | <a href="#">eftu1_ecoli</a>  | secA | tufA |
| POCE47 | <a href="#">seca_ecoli</a> | <a href="#">eftu1_ecoli</a>  | secA | tufA |
| POC8J8 | <a href="#">seca_ecoli</a> | <a href="#">gatz_ecoli</a>   | secA | gatZ |
| P0A707 | <a href="#">seca_ecoli</a> | <a href="#">if3_ecoli</a>    | secA | infC |
| P0A817 | <a href="#">seca_ecoli</a> | <a href="#">metk_ecoli</a>   | secA | metK |
| P0AEZ3 | <a href="#">seca_ecoli</a> | <a href="#">mind_ecoli</a>   | secA | minD |
| P09348 | <a href="#">seca_ecoli</a> | <a href="#">mota_ecoli</a>   | secA | motA |
| P0A9X4 | <a href="#">seca_ecoli</a> | <a href="#">mreb_ecoli</a>   | secA | mreB |
| Q46877 | <a href="#">seca_ecoli</a> | <a href="#">norv_ecoli</a>   | secA | norV |
| Q9F560 | <a href="#">seca_ecoli</a> | <a href="#">q9f560_ecolx</a> | secA | ycfB |
| P0AG30 | <a href="#">seca_ecoli</a> | <a href="#">rho_ecoli</a>    | secA | rho  |
| P0A7J7 | <a href="#">seca_ecoli</a> | <a href="#">rl11_ecoli</a>   | secA | rpIK |
| P61175 | <a href="#">seca_ecoli</a> | <a href="#">rl22_ecoli</a>   | secA | rpIV |
| P60723 | <a href="#">seca_ecoli</a> | <a href="#">rl4_ecoli</a>    | secA | rpID |
| P0A7K2 | <a href="#">seca_ecoli</a> | <a href="#">rl7_ecoli</a>    | secA | rpIL |
| P0A7V0 | <a href="#">seca_ecoli</a> | <a href="#">rs2_ecoli</a>    | secA | rpsB |
| P10408 | <a href="#">seca_ecoli</a> | <a href="#">seca_ecoli</a>   | secA | secA |
| P0AG86 | <a href="#">seca_ecoli</a> | <a href="#">secb_ecoli</a>   | secA | secB |
| P0AG86 | <a href="#">seca_ecoli</a> | <a href="#">secb_ecoli</a>   | secA | secB |
| P0AGA2 | <a href="#">seca_ecoli</a> | <a href="#">secy_ecoli</a>   | secA | secY |
| P75791 | <a href="#">seca_ecoli</a> | <a href="#">ybiu_ecoli</a>   | secA | ybiU |
| P75838 | <a href="#">seca_ecoli</a> | <a href="#">ycao_ecoli</a>   | secA | ycaO |
| P77804 | <a href="#">seca_ecoli</a> | <a href="#">ydga_ecoli</a>   | secA | ydgA |
| P39396 | <a href="#">seca_ecoli</a> | <a href="#">yjiy_ecoli</a>   | secA | yjiY |
| P0AE88 | <a href="#">secb_ecoli</a> | <a href="#">cpxr_ecoli</a>   | secB | cpxR |
| P0A9M0 | <a href="#">secb_ecoli</a> | <a href="#">lon_ecoli</a>    | secB | lon  |
| P0A9M0 | <a href="#">secb_ecoli</a> | <a href="#">lon_ecoli</a>    | secB | lon  |
| P0AF06 | <a href="#">secb_ecoli</a> | <a href="#">motb_ecoli</a>   | secB | motB |
| P0A772 | <a href="#">secb_ecoli</a> | <a href="#">nrld_ecoli</a>   | secB | nrld |
| P75697 | <a href="#">secb_ecoli</a> | <a href="#">p75698_ecoli</a> | secB | -    |
| P0A7V3 | <a href="#">secb_ecoli</a> | <a href="#">rs3_ecoli</a>    | secB | rpsC |
| P10408 | <a href="#">secb_ecoli</a> | <a href="#">seca_ecoli</a>   | secB | secA |
| P75745 | <a href="#">secb_ecoli</a> | <a href="#">ybgk_ecoli</a>   | secB | ybgK |

|        |            |            |      |      |
|--------|------------|------------|------|------|
| P08622 | selb_ecoli | dnaj_ecoli | selB | dnaJ |
| P08622 | selb_ecoli | dnaj_ecoli | selB | dnaJ |
| P0AFG8 | selb_ecoli | odp1_ecoli | selB | aceE |
| P06959 | selb_ecoli | odp2_ecoli | selB | aceF |
| P76773 | selb_ecoli | ompl_ecoli | selB | ompL |
| P0A9M8 | selb_ecoli | pta_ecoli  | selB | pta  |
| P0AG30 | selb_ecoli | rho_ecoli  | selB | rho  |
| P0A7L0 | selb_ecoli | rl1_ecoli  | selB | rplA |
| P0AA10 | selb_ecoli | rl13_ecoli | selB | rplM |
| P02413 | selb_ecoli | rl15_ecoli | selB | rplO |
| P0AG44 | selb_ecoli | rl17_ecoli | selB | rplQ |
| P0A7K6 | selb_ecoli | rl19_ecoli | selB | rplS |
| P60422 | selb_ecoli | rl2_ecoli  | selB | rplB |
| P60422 | selb_ecoli | rl2_ecoli  | selB | rplB |
| P0A7L3 | selb_ecoli | rl20_ecoli | selB | rplT |
| P0AG48 | selb_ecoli | rl21_ecoli | selB | rplU |
| P61175 | selb_ecoli | rl22_ecoli | selB | rplV |
| P60624 | selb_ecoli | rl24_ecoli | selB | rplX |
| P68919 | selb_ecoli | rl25_ecoli | selB | rplY |
| P0A7M2 | selb_ecoli | rl28_ecoli | selB | rpmB |
| P60438 | selb_ecoli | rl3_ecoli  | selB | rplC |
| P60438 | selb_ecoli | rl3_ecoli  | selB | rplC |
| P60723 | selb_ecoli | rl4_ecoli  | selB | rplD |
| P0A7K2 | selb_ecoli | rl7_ecoli  | selB | rplL |
| P0A7R1 | selb_ecoli | rl9_ecoli  | selB | rplI |
| P37765 | selb_ecoli | rlub_ecoli | selB | rluB |
| P21499 | selb_ecoli | rnrc_ecoli | selB | rnrc |
| P0AG67 | selb_ecoli | rs1_ecoli  | selB | rpsA |
| P0A7U7 | selb_ecoli | rs20_ecoli | selB | rpsT |
| P0A7V3 | selb_ecoli | rs3_ecoli  | selB | rpsC |
| P0A7V8 | selb_ecoli | rs4_ecoli  | selB | rpsD |
| P0A7V8 | selb_ecoli | rs4_ecoli  | selB | rpsD |
| P0A7W1 | selb_ecoli | rs5_ecoli  | selB | rpsE |
| P02358 | selb_ecoli | rs6_ecoli  | selB | rpsF |
| P02359 | selb_ecoli | rs7_ecoli  | selB | rpsG |
| P0A7X3 | selb_ecoli | rs9_ecoli  | selB | rpsI |
| P21507 | selb_ecoli | srmB_ecoli | selB | srmB |
| P21507 | selb_ecoli | srmB_ecoli | selB | srmB |
| P0AGJ5 | selb_ecoli | yfiF_ecoli | selB | yfiF |
| P0AGJ5 | selb_ecoli | yfiF_ecoli | selB | yfiF |
|        |            |            |      |      |
| P12999 | seld_ecoli | bioc_ecoli | seld | bioC |
| P30015 | seld_ecoli | lhr_ecoli  | seld | lhr  |
| P22523 | seld_ecoli | mukB_ecoli | seld | mukB |
| P18843 | seld_ecoli | nade_ecoli | seld | nade |

|        |            |            |      |      |
|--------|------------|------------|------|------|
| P60422 | seld_ecoli | rl2_ecoli  | seld | rplB |
| P0A8T7 | seld_ecoli | rpoc_ecoli | seld | rpoC |
| P0A7X3 | seld_ecoli | rs9_ecoli  | seld | rpsI |
| P28722 | seld_ecoli | yhca_ecoli | seld | yhca |
| P04152 | seqa_ecoli | umuc_ecoli | seqA | umuC |
| P18843 | serb_ecoli | nade_ecoli | serB | nadE |
| P0A6F5 | sgrr_ecoli | ch60_ecoli | sgrR | groL |
| P14407 | sgrr_ecoli | fumb_ecoli | sgrR | fumB |
| P0AA10 | skp_ecoli  | rl13_ecoli | skp  | rplM |
| P02413 | skp_ecoli  | rl15_ecoli | skp  | rplO |
| P0A7K6 | skp_ecoli  | rl19_ecoli | skp  | rplS |
| P0AG48 | skp_ecoli  | rl21_ecoli | skp  | rplU |
| P61175 | skp_ecoli  | rl22_ecoli | skp  | rplV |
| P60624 | skp_ecoli  | rl24_ecoli | skp  | rplX |
| P62399 | skp_ecoli  | rl5_ecoli  | skp  | rplE |
| P0A7R1 | skp_ecoli  | rl9_ecoli  | skp  | rplI |
| P21499 | skp_ecoli  | rnr_ecoli  | skp  | rnr  |
| P0A7S9 | skp_ecoli  | rs13_ecoli | skp  | rpsM |
| P0AG24 | skp_ecoli  | spot_ecoli | skp  | spoT |
| P00961 | skp_ecoli  | sygb_ecoli | skp  | glyS |
| P60906 | skp_ecoli  | syh_ecoli  | skp  | hisS |
| P37194 | slp_ecoli  | slp_ecoli  | slp  | slp  |
| P17444 | slyd_ecoli | beta_ecoli | slyD | betA |
| P0ACF0 | slyd_ecoli | dbha_ecoli | slyD | hupA |
| P0ACF4 | slyd_ecoli | dbhb_ecoli | slyD | hupB |
| P04949 | slyd_ecoli | flic_ecoli | slyD | fliC |
| P0AAG3 | slyd_ecoli | gltl_ecoli | slyD | gltL |
| P68066 | slyd_ecoli | grca_ecoli | slyD | grcA |
| P0AAN3 | slyd_ecoli | hypb_ecoli | slyD | hypB |

|        |            |             |      |       |
|--------|------------|-------------|------|-------|
| P0AAN3 | slyd_ecoli | hypb_ecoli  | slyD | hypB  |
| P19767 | slyd_ecoli | insa7_ecoli | slyD | insa7 |
| P03023 | slyd_ecoli | laci_ecoli  | slyD | lacI  |
| P43337 | slyd_ecoli | nudl_ecoli  | slyD | nudL  |
| P0AFG0 | slyd_ecoli | nusg_ecoli  | slyD | nusG  |
| P0ADY3 | slyd_ecoli | rl14_ecoli  | slyD | rpIN  |
| P02413 | slyd_ecoli | rl15_ecoli  | slyD | rpIO  |
| P0ADZ0 | slyd_ecoli | rl23_ecoli  | slyD | rpIW  |
| P0A7L8 | slyd_ecoli | rl27_ecoli  | slyD | rpmA  |
| P62399 | slyd_ecoli | rl5_ecoli   | slyD | rpIE  |
| P0AG55 | slyd_ecoli | rl6_ecoli   | slyD | rpIF  |
| P0A7V8 | slyd_ecoli | rs4_ecoli   | slyD | rpsD  |
| P0A7W1 | slyd_ecoli | rs5_ecoli   | slyD | rpsE  |
| P0A7X3 | slyd_ecoli | rs9_ecoli   | slyD | rpsI  |
| P0AAH4 | slyd_ecoli | sapd_ecoli  | slyD | sapD  |
| P0A8L1 | slyd_ecoli | sys_ecoli   | slyD | serS  |
| P39306 | slyd_ecoli | ulaf_ecoli  | slyD | ulaF  |
| P75988 | slyd_ecoli | ycgx_ecoli  | slyD | ycgX  |
| P31130 | slyd_ecoli | ydei_ecoli  | slyD | ydeI  |
| P45769 | slyd_ecoli | yhdz_ecoli  | slyD | yhdZ  |
| P37655 | slyd_ecoli | yhjQ_ecoli  | slyD | yhjQ  |
|        |            |             |      |       |
| P0ACZ4 | sodf_ecoli | evga_ecoli  | sodB | evgA  |
| P0A912 | sodf_ecoli | pal_ecoli   | sodB | pal   |
| P60422 | sodf_ecoli | rl2_ecoli   | sodB | rpIB  |
| P0A9K9 | sodf_ecoli | slyd_ecoli  | sodB | slyD  |
| P37338 | sodf_ecoli | ygae_ecoli  | sodB | ygaE  |
|        |            |             |      |       |
| P0A6B4 | sodm_ecoli | alr1_ecoli  | sodA | alr   |
| P76459 | sodm_ecoli | atoa_ecoli  | sodA | atoA  |
| P0A996 | sodm_ecoli | glpc_ecoli  | sodA | glpC  |
| P37326 | sodm_ecoli | ints_ecoli  | sodA | intS  |
| P25888 | sodm_ecoli | rhle_ecoli  | sodA | rhIE  |
| P23839 | sodm_ecoli | yicc_ecoli  | sodA | yicC  |
|        |            |             |      |       |
| P18843 | spea_ecoli | nade_ecoli  | speA | nadE  |
| P23862 | spea_ecoli | pric_ecoli  | speA | priC  |
| P09377 | spea_ecoli | rhas_ecoli  | speA | rhaS  |
| P0AG44 | spea_ecoli | rl17_ecoli  | speA | rpIQ  |
| P60422 | spea_ecoli | rl2_ecoli   | speA | rpIB  |
| P0A8T7 | spea_ecoli | rpoc_ecoli  | speA | rpoC  |
| P0A7V0 | spea_ecoli | rs2_ecoli   | speA | rpsB  |
| P0A7V3 | spea_ecoli | rs3_ecoli   | speA | rpsC  |

|        |            |             |      |      |
|--------|------------|-------------|------|------|
| P0A7V8 | spea_ecoli | rs4_ecoli   | speA | rpsD |
| P02359 | spea_ecoli | rs7_ecoli   | speA | rpsG |
| P0AAP5 | spea_ecoli | yaiv_ecoli  | speA | yaiV |
| P77561 | spea_ecoli | ydep_ecoli  | speA | ydeP |
| P36683 | sped_ecoli | acon2_ecoli | speD | acnB |
| P0A6Y8 | sped_ecoli | dnak_ecoli  | speD | dnaK |
| P0A6S5 | sped_ecoli | ftsb_ecoli  | speD | ftsB |
| P0A6A8 | spot_ecoli | acp_ecoli   | spoT | acpP |
| P0ACF0 | spot_ecoli | dbha_ecoli  | spoT | hupA |
| P0A9P6 | spot_ecoli | dead_ecoli  | spoT | deaD |
| P0CE47 | spot_ecoli | eftu1_ecoli | spoT | tufA |
| P43329 | spot_ecoli | hrpa_ecoli  | spoT | hrpA |
| P22523 | spot_ecoli | mukb_ecoli  | spoT | mukB |
| P0AA10 | spot_ecoli | rl13_ecoli  | spoT | rplM |
| P02413 | spot_ecoli | rl15_ecoli  | spoT | rplO |
| P0AG44 | spot_ecoli | rl17_ecoli  | spoT | rplQ |
| P0C018 | spot_ecoli | rl18_ecoli  | spoT | rplR |
| P0A7K6 | spot_ecoli | rl19_ecoli  | spoT | rplS |
| P60422 | spot_ecoli | rl2_ecoli   | spoT | rplB |
| P60422 | spot_ecoli | rl2_ecoli   | spoT | rplB |
| P0AG48 | spot_ecoli | rl21_ecoli  | spoT | rplU |
| P61175 | spot_ecoli | rl22_ecoli  | spoT | rplV |
| P61175 | spot_ecoli | rl22_ecoli  | spoT | rplV |
| P60624 | spot_ecoli | rl24_ecoli  | spoT | rplX |
| P0A7M2 | spot_ecoli | rl28_ecoli  | spoT | rpmB |
| P60438 | spot_ecoli | rl3_ecoli   | spoT | rplC |
| P60438 | spot_ecoli | rl3_ecoli   | spoT | rplC |
| P60723 | spot_ecoli | rl4_ecoli   | spoT | rplD |
| P60723 | spot_ecoli | rl4_ecoli   | spoT | rplD |
| P0A7K2 | spot_ecoli | rl7_ecoli   | spoT | rplL |
| P0A7R1 | spot_ecoli | rl9_ecoli   | spoT | rplI |
| P37765 | spot_ecoli | rlub_ecoli  | spoT | rluB |
| P0A8T7 | spot_ecoli | rpoc_ecoli  | spoT | rpoC |
| P0AG67 | spot_ecoli | rs1_ecoli   | spoT | rpsA |
| P0A7R5 | spot_ecoli | rs10_ecoli  | spoT | rpsJ |
| P0A7R9 | spot_ecoli | rs11_ecoli  | spoT | rpsK |
| P0A7S3 | spot_ecoli | rs12_ecoli  | spoT | rpsL |
| P0AG59 | spot_ecoli | rs14_ecoli  | spoT | rpsN |
| P0A7T3 | spot_ecoli | rs16_ecoli  | spoT | rpsP |
| P0A7T7 | spot_ecoli | rs18_ecoli  | spoT | rpsR |
| P0A7V0 | spot_ecoli | rs2_ecoli   | spoT | rpsB |
| P0A7U7 | spot_ecoli | rs20_ecoli  | spoT | rpsT |
| P0A7V3 | spot_ecoli | rs3_ecoli   | spoT | rpsC |

|        |            |            |      |      |
|--------|------------|------------|------|------|
| P0A7V8 | spot_ecoli | rs4_ecoli  | spoT | rpsD |
| P0A7W1 | spot_ecoli | rs5_ecoli  | spoT | rpsE |
| P02358 | spot_ecoli | rs6_ecoli  | spoT | rpsF |
| P02359 | spot_ecoli | rs7_ecoli  | spoT | rpsG |
| P02359 | spot_ecoli | rs7_ecoli  | spoT | rpsG |
| P0A7W7 | spot_ecoli | rs8_ecoli  | spoT | rpsH |
| P0A7X3 | spot_ecoli | rs9_ecoli  | spoT | rpsI |
| P21507 | spot_ecoli | srmb_ecoli | spoT | srmb |
| P0ABV6 | spot_ecoli | tolr_ecoli | spoT | tolR |
| P0AGJ2 | spot_ecoli | trmh_ecoli | spoT | trmH |
| Q9S4W2 | spot_ecoli | yubm_ecoli | spoT | yubM |

|        |            |             |      |      |
|--------|------------|-------------|------|------|
| P0ACB0 | srmb_ecoli | dnab_ecoli  | srmb | dnaB |
| P08622 | srmb_ecoli | dnaj_ecoli  | srmb | dnaJ |
| P0CE47 | srmb_ecoli | eftu1_ecoli | srmb | tufA |
| P0A7L0 | srmb_ecoli | rl1_ecoli   | srmb | rplA |
| P60422 | srmb_ecoli | rl2_ecoli   | srmb | rplB |
| P60422 | srmb_ecoli | rl2_ecoli   | srmb | rplB |
| P61175 | srmb_ecoli | rl22_ecoli  | srmb | rplV |
| P61175 | srmb_ecoli | rl22_ecoli  | srmb | rplV |
| P0ADZ0 | srmb_ecoli | rl23_ecoli  | srmb | rplW |
| P60624 | srmb_ecoli | rl24_ecoli  | srmb | rplX |
| P60624 | srmb_ecoli | rl24_ecoli  | srmb | rplX |
| P60723 | srmb_ecoli | rl4_ecoli   | srmb | rplD |
| P60723 | srmb_ecoli | rl4_ecoli   | srmb | rplD |
| P0A7K2 | srmb_ecoli | rl7_ecoli   | srmb | rplL |
| P75864 | srmb_ecoli | rlml_ecoli  | srmb | rlmL |
| P37765 | srmb_ecoli | rlub_ecoli  | srmb | rluB |
| P0A7V0 | srmb_ecoli | rs2_ecoli   | srmb | rpsB |
| P0A7V3 | srmb_ecoli | rs3_ecoli   | srmb | rpsC |
| P0A7X3 | srmb_ecoli | rs9_ecoli   | srmb | rpsI |

|        |             |            |     |      |
|--------|-------------|------------|-----|------|
| P0A9Q7 | srp54_ecoli | adhe_ecoli | ffh | adhE |
| P0ABH9 | srp54_ecoli | clpa_ecoli | ffh | clpA |
| P0A9M0 | srp54_ecoli | lon_ecoli  | ffh | lon  |
| P0A817 | srp54_ecoli | metk_ecoli | ffh | metK |

|        |           |            |     |      |
|--------|-----------|------------|-----|------|
| P15288 | ssb_ecoli | pepd_ecoli | ssb | pepD |
| P25888 | ssb_ecoli | rhle_ecoli | ssb | rhIE |

|        |            |            |      |      |
|--------|------------|------------|------|------|
| P0A6F5 | sspa_ecoli | ch60_ecoli | sspA | groL |
| P0A6Y8 | sspa_ecoli | dnak_ecoli | sspA | dnaK |
| P54745 | sspa_ecoli | hrsa_ecoli | sspA | hrsA |

|        |            |            |      |      |
|--------|------------|------------|------|------|
| P09373 | sspa_ecoli | pflb_ecoli | sspA | pflB |
| P0A7R1 | sspa_ecoli | rl9_ecoli  | sspA | rplI |
| P0A7Z4 | sspa_ecoli | rpoa_ecoli | sspA | rpoA |
| P0A8V2 | sspa_ecoli | rpob_ecoli | sspA | rpoB |
| P0A8T7 | sspa_ecoli | rpoc_ecoli | sspA | rpoC |
| P0A8N5 | sspa_ecoli | syk2_ecoli | sspA | lysU |
| P0A8L1 | sspa_ecoli | sys_ecoli  | sspA | serS |
| P30139 | sspa_ecoli | thig_ecoli | sspA | thiG |
| P0AAD4 | sspa_ecoli | tyrp_ecoli | sspA | tyrP |
| P77400 | sspa_ecoli | ybat_ecoli | sspA | ybaT |
|        |            |            |      |      |
| P33224 | ssrp_ecoli | aidb_ecoli | smpB | aidB |
| P0ABH9 | ssrp_ecoli | clpa_ecoli | smpB | clpA |
| P0ACF0 | ssrp_ecoli | dbha_ecoli | smpB | hupA |
| P0ACF4 | ssrp_ecoli | dbhb_ecoli | smpB | hupB |
| P0AES4 | ssrp_ecoli | gyra_ecoli | smpB | gyrA |
| P0AES6 | ssrp_ecoli | gyrb_ecoli | smpB | gyrB |
| P0A705 | ssrp_ecoli | if2_ecoli  | smpB | infB |
| P0AFI2 | ssrp_ecoli | parc_ecoli | smpB | parC |
| P00490 | ssrp_ecoli | phsm_ecoli | smpB | malP |
| P0A7L0 | ssrp_ecoli | rl1_ecoli  | smpB | rplA |
| P0AA10 | ssrp_ecoli | rl13_ecoli | smpB | rplM |
| P60624 | ssrp_ecoli | rl24_ecoli | smpB | rplX |
| P0A7M2 | ssrp_ecoli | rl28_ecoli | smpB | rpmB |
| P0AG55 | ssrp_ecoli | rl6_ecoli  | smpB | rplF |
| P0AG55 | ssrp_ecoli | rl6_ecoli  | smpB | rplF |
| P0AG67 | ssrp_ecoli | rs1_ecoli  | smpB | rpsA |
| P0AG67 | ssrp_ecoli | rs1_ecoli  | smpB | rpsA |
| P0AG59 | ssrp_ecoli | rs14_ecoli | smpB | rpsN |
| P0A7V0 | ssrp_ecoli | rs2_ecoli  | smpB | rpsB |
| P0A7V0 | ssrp_ecoli | rs2_ecoli  | smpB | rpsB |
| P0A7V3 | ssrp_ecoli | rs3_ecoli  | smpB | rpsC |
| P0A7W1 | ssrp_ecoli | rs5_ecoli  | smpB | rpsE |
| P10408 | ssrp_ecoli | seca_ecoli | smpB | secA |
| P14081 | ssrp_ecoli | selb_ecoli | smpB | selB |
| P0AEU7 | ssrp_ecoli | skp_ecoli  | smpB | skp  |
| P0AGJ7 | ssrp_ecoli | trml_ecoli | smpB | trmL |
| P09184 | ssrp_ecoli | vsr_ecoli  | smpB | vsr  |
| P22525 | ssrp_ecoli | yccb_ecoli | smpB | ycbB |
| P0AB35 | ssrp_ecoli | ycfj_ecoli | smpB | ycfJ |
| P75989 | ssrp_ecoli | ycge_ecoli | smpB | ycgE |
| P0A8M6 | ssrp_ecoli | yeex_ecoli | smpB | yeeX |
| P0AGJ5 | ssrp_ecoli | yfif_ecoli | smpB | yfiF |
|        |            |            |      |      |
| P00562 | stfr_ecoli | ak2h_ecoli | stfR | metL |

|        |            |             |      |      |
|--------|------------|-------------|------|------|
| P23325 | stfr_ecoli | arpa_ecoli  | stfR | arpA |
| P00582 | stfr_ecoli | dpo1_ecoli  | stfR | polA |
| P0AFG8 | stfr_ecoli | odp1_ecoli  | stfR | aceE |
| P75905 | stfr_ecoli | pgac_ecoli  | stfR | pgaC |
| P60422 | stfr_ecoli | rl2_ecoli   | stfR | rplB |
| P76403 | stfr_ecoli | yegq_ecoli  | stfR | yegQ |
|        |            |             |      |      |
| P0A6Z3 | stpa_ecoli | htpg_ecoli  | stpA | htpG |
| P0A717 | stpa_ecoli | kprs_ecoli  | stpA | prs  |
| P60422 | stpa_ecoli | rl2_ecoli   | stpA | rplB |
| P0A7V8 | stpa_ecoli | rs4_ecoli   | stpA | rpsD |
| P0A9K9 | stpa_ecoli | slyd_ecoli  | stpA | slyD |
| P75989 | stpa_ecoli | ycge_ecoli  | stpA | ycgE |
|        |            |             |      |      |
| P0AC41 | succ_ecoli | dhsa_ecoli  | sucC | sdhA |
| P0AC53 | succ_ecoli | g6pd_ecoli  | sucC | zwf  |
| P0A717 | succ_ecoli | kprs_ecoli  | sucC | prs  |
| P0AFG6 | succ_ecoli | odo2_ecoli  | sucC | sucB |
| P0AA43 | succ_ecoli | rsua_ecoli  | sucC | rsuA |
| P0AGE9 | succ_ecoli | sucd_ecoli  | sucC | sucD |
| P0AGE9 | succ_ecoli | sucd_ecoli  | sucC | sucD |
| P0AGE9 | succ_ecoli | sucd_ecoli  | sucC | sucD |
| P04152 | succ_ecoli | umuc_ecoli  | sucC | umuC |
|        |            |             |      |      |
| P0AC41 | sucd_ecoli | dhsa_ecoli  | sucD | sdhA |
| P10443 | sucd_ecoli | dpo3a_ecoli | sucD | dnaE |
| P0AA43 | sucd_ecoli | rsua_ecoli  | sucD | rsuA |
|        |            |             |      |      |
| P0A6F5 | sufc_ecoli | ch60_ecoli  | sufC | groL |
| P0ABK5 | sufc_ecoli | cysk_ecoli  | sufC | cysK |
| P33940 | sufc_ecoli | mqqo_ecoli  | sufC | mqqo |
| P08373 | sufc_ecoli | murb_ecoli  | sufC | murB |
| P0A7L0 | sufc_ecoli | rl1_ecoli   | sufC | rplA |
| P77522 | sufc_ecoli | sufb_ecoli  | sufC | sufB |
| P77689 | sufc_ecoli | sufd_ecoli  | sufC | sufD |
| P0AFQ2 | sufc_ecoli | ybhs_ecoli  | sufC | ybhS |
|        |            |             |      |      |
| P0A6F5 | sufs_ecoli | ch60_ecoli  | sufS | groL |
| P0ABT2 | sufs_ecoli | dps_ecoli   | sufS | dps  |
| P0A9M0 | sufs_ecoli | lon_ecoli   | sufS | lon  |
| P69367 | sufs_ecoli | mdth_ecoli  | sufS | mdtH |
| P77316 | sufs_ecoli | ybdr_ecoli  | sufS | ybdR |
| P76463 | sufs_ecoli | yfaq_ecoli  | sufS | yfaQ |
| P28722 | sufs_ecoli | yhca_ecoli  | sufS | yhca |



|        |                            |                             |      |      |
|--------|----------------------------|-----------------------------|------|------|
| P0A9P0 | <a href="#">sura_ecoli</a> | <a href="#">dldh_ecoli</a>  | surA | lpdA |
| P0A6Y8 | <a href="#">sura_ecoli</a> | <a href="#">dnak_ecoli</a>  | surA | dnaK |
| P0AAI3 | <a href="#">sura_ecoli</a> | <a href="#">ftsh_ecoli</a>  | surA | ftsH |
| P17334 | <a href="#">sura_ecoli</a> | <a href="#">ptqc_ecoli</a>  | surA | chbC |
| P0A7K2 | <a href="#">sura_ecoli</a> | <a href="#">rl7_ecoli</a>   | surA | rpIL |
| P0AG59 | <a href="#">sura_ecoli</a> | <a href="#">rs14_ecoli</a>  | surA | rpsN |
| P04968 | <a href="#">sura_ecoli</a> | <a href="#">thd1_ecoli</a>  | surA | ilvA |
| P76069 | <a href="#">sura_ecoli</a> | <a href="#">yday_ecoli</a>  | surA | ydaY |
|        |                            |                             |      |      |
| P37652 | <a href="#">sya_ecoli</a>  | <a href="#">bcsb_ecoli</a>  | alaS | bcsB |
| P0A6Y8 | <a href="#">sya_ecoli</a>  | <a href="#">dnak_ecoli</a>  | alaS | dnaK |
| P0CE47 | <a href="#">sya_ecoli</a>  | <a href="#">eftu1_ecoli</a> | alaS | tufA |
| P0A7V0 | <a href="#">sya_ecoli</a>  | <a href="#">rs2_ecoli</a>   | alaS | rpsB |
| P38104 | <a href="#">sya_ecoli</a>  | <a href="#">rspa_ecoli</a>  | alaS | rspA |
| P76160 | <a href="#">sya_ecoli</a>  | <a href="#">ydfR_ecoli</a>  | alaS | ydfR |
| P17994 | <a href="#">sya_ecoli</a>  | <a href="#">yfaa_ecoli</a>  | alaS | yfaA |
|        |                            |                             |      |      |
| P0A6K3 | <a href="#">syc_ecoli</a>  | <a href="#">def_ecoli</a>   | cysS | def  |
| P18843 | <a href="#">syc_ecoli</a>  | <a href="#">nade_ecoli</a>  | cysS | nadE |
|        |                            |                             |      |      |
| P36683 | <a href="#">syd_ecoli</a>  | <a href="#">acon2_ecoli</a> | aspS | acnB |
| P09832 | <a href="#">syd_ecoli</a>  | <a href="#">gltD_ecoli</a>  | aspS | gltD |
| P0A738 | <a href="#">syd_ecoli</a>  | <a href="#">moac_ecoli</a>  | aspS | moaC |
| P18843 | <a href="#">syd_ecoli</a>  | <a href="#">nade_ecoli</a>  | aspS | nadE |
| P31061 | <a href="#">syd_ecoli</a>  | <a href="#">noha_ecoli</a>  | aspS | nohA |
| P0A8T7 | <a href="#">syd_ecoli</a>  | <a href="#">rpoc_ecoli</a>  | aspS | rpoC |
| P0A9K9 | <a href="#">syd_ecoli</a>  | <a href="#">slyd_ecoli</a>  | aspS | slyD |
| P0A8M0 | <a href="#">syd_ecoli</a>  | <a href="#">syn_ecoli</a>   | aspS | asnS |
|        |                            |                             |      |      |
| P31554 | <a href="#">sye_ecoli</a>  | <a href="#">lptd_ecoli</a>  | gltX | lptD |
| P77188 | <a href="#">sye_ecoli</a>  | <a href="#">matc_ecoli</a>  | gltX | matC |
| P60723 | <a href="#">sye_ecoli</a>  | <a href="#">rl4_ecoli</a>   | gltX | rpID |
| P0A7V3 | <a href="#">sye_ecoli</a>  | <a href="#">rs3_ecoli</a>   | gltX | rpsC |
| P0A9K9 | <a href="#">sye_ecoli</a>  | <a href="#">slyd_ecoli</a>  | gltX | slyD |
| P76160 | <a href="#">sye_ecoli</a>  | <a href="#">ydfR_ecoli</a>  | gltX | ydfR |
|        |                            |                             |      |      |
| P32715 | <a href="#">syfb_ecoli</a> | <a href="#">mdto_ecoli</a>  | pheT | mdtO |
| P30958 | <a href="#">syfb_ecoli</a> | <a href="#">mfd_ecoli</a>   | pheT | mfd  |
| P0A7V0 | <a href="#">syfb_ecoli</a> | <a href="#">rs2_ecoli</a>   | pheT | rpsB |
| P0AG90 | <a href="#">syfb_ecoli</a> | <a href="#">secd_ecoli</a>  | pheT | secD |
| P08312 | <a href="#">syfb_ecoli</a> | <a href="#">syfa_ecoli</a>  | pheT | pheS |
| P08312 | <a href="#">syfb_ecoli</a> | <a href="#">syfa_ecoli</a>  | pheT | pheS |
| P76237 | <a href="#">syfb_ecoli</a> | <a href="#">yeaj_ecoli</a>  | pheT | yeaJ |
| Q46841 | <a href="#">syfb_ecoli</a> | <a href="#">yghq_ecoli</a>  | pheT | yghQ |

|        |            |             |      |      |
|--------|------------|-------------|------|------|
| P08622 | syga_ecoli | dnaj_ecoli  | glyQ | dnaJ |
| P08622 | syga_ecoli | dnaj_ecoli  | glyQ | dnaJ |
| P0CE47 | syga_ecoli | eftu1_ecoli | glyQ | tufA |
| P09394 | syga_ecoli | glpq_ecoli  | glyQ | glpQ |
| P23865 | syga_ecoli | prc_ecoli   | glyQ | prc  |
| P0AA10 | syga_ecoli | rl13_ecoli  | glyQ | rpIM |
| P0ADY7 | syga_ecoli | rl16_ecoli  | glyQ | rpIP |
| P0A7K6 | syga_ecoli | rl19_ecoli  | glyQ | rpIS |
| P0AG48 | syga_ecoli | rl21_ecoli  | glyQ | rpIU |
| P61175 | syga_ecoli | rl22_ecoli  | glyQ | rpIV |
| P0A7M2 | syga_ecoli | rl28_ecoli  | glyQ | rpmB |
| P60723 | syga_ecoli | rl4_ecoli   | glyQ | rpID |
| P0AG55 | syga_ecoli | rl6_ecoli   | glyQ | rpIF |
| P0A7S9 | syga_ecoli | rs13_ecoli  | glyQ | rpsM |
| P0A7T3 | syga_ecoli | rs16_ecoli  | glyQ | rpsP |
| P0A7V0 | syga_ecoli | rs2_ecoli   | glyQ | rpsB |
| P0A7V3 | syga_ecoli | rs3_ecoli   | glyQ | rpsC |
| P0A7W1 | syga_ecoli | rs5_ecoli   | glyQ | rpsE |
| P0AEF0 | sygb_ecoli | dnac_ecoli  | glyS | dnaC |
| P15038 | sygb_ecoli | held_ecoli  | glyS | held |
| P05847 | sygb_ecoli | ttda_ecoli  | glyS | ttdA |
| P0ACN4 | syi_ecoli  | allr_ecoli  | ileS | allR |
| P08622 | syi_ecoli  | dnaj_ecoli  | ileS | dnaJ |
| P0CE47 | syi_ecoli  | eftu1_ecoli | ileS | tufA |
| P13035 | syi_ecoli  | glpd_ecoli  | ileS | glpD |
| P19930 | syi_ecoli  | hyad_ecoli  | ileS | hyaD |
| P0A7B1 | syi_ecoli  | ppk_ecoli   | ileS | ppk  |
| P02925 | syi_ecoli  | rbsb_ecoli  | ileS | rbsB |
| P36661 | syi_ecoli  | ycce_ecoli  | ileS | yccE |
| P39336 | syi_ecoli  | yjgl_ecoli  | ileS | yjgL |
| P12995 | syk1_ecoli | bioa_ecoli  | lysS | bioA |
| P15877 | syk1_ecoli | dhg_ecoli   | lysS | gcd  |
| P77399 | syk1_ecoli | fadj_ecoli  | lysS | fadJ |
| P18843 | syk1_ecoli | nade_ecoli  | lysS | nadE |
| P0A794 | syk1_ecoli | pdxj_ecoli  | lysS | pdxJ |
| P0AFJ5 | syk1_ecoli | phob_ecoli  | lysS | phoB |
| P05458 | syk1_ecoli | ptrA_ecoli  | lysS | ptrA |
| P09377 | syk1_ecoli | rhas_ecoli  | lysS | rhaS |
| P16916 | syk1_ecoli | rhas_ecoli  | lysS | rhaS |
| P11868 | syk1_ecoli | tdcd_ecoli  | lysS | tdcD |
| P77561 | syk1_ecoli | ydep_ecoli  | lysS | ydeP |
| Q46802 | syk1_ecoli | ygev_ecoli  | lysS | ygeV |

|        |            |            |      |      |
|--------|------------|------------|------|------|
| P0A9Q7 | syk2_ecoli | adhe_ecoli | lysU | adhE |
| P21179 | syk2_ecoli | cate_ecoli | lysU | katE |
| P63284 | syk2_ecoli | clpb_ecoli | lysU | clpB |
| P0A9Y6 | syk2_ecoli | cspc_ecoli | lysU | cspC |
| P0ABK5 | syk2_ecoli | cysk_ecoli | lysU | cysK |
| P00861 | syk2_ecoli | dcda_ecoli | lysU | lysA |
| P69908 | syk2_ecoli | dcea_ecoli | lysU | gadA |
| P69910 | syk2_ecoli | dceb_ecoli | lysU | gadB |
| P0ABT2 | syk2_ecoli | dps_ecoli  | lysU | dps  |
| P0ABT2 | syk2_ecoli | dps_ecoli  | lysU | dps  |
| P0A6M8 | syk2_ecoli | efg_ecoli  | lysU | fusA |
| P0A6P9 | syk2_ecoli | eno_ecoli  | lysU | eno  |
| P0A6P9 | syk2_ecoli | eno_ecoli  | lysU | eno  |
| P77733 | syk2_ecoli | focb_ecoli | lysU | focB |
| P68066 | syk2_ecoli | grca_ecoli | lysU | grcA |
| P0AFB1 | syk2_ecoli | nlpi_ecoli | lysU | nlpI |
| P09373 | syk2_ecoli | pflb_ecoli | lysU | pflB |
| P09373 | syk2_ecoli | pflb_ecoli | lysU | pflB |
| P0A799 | syk2_ecoli | pgk_ecoli  | lysU | pgk  |
| P0A8V2 | syk2_ecoli | rpob_ecoli | lysU | rpoB |
| P0A8T7 | syk2_ecoli | rpoc_ecoli | lysU | rpoC |
| P00956 | syk2_ecoli | syi_ecoli  | lysU | ileS |
| P0A8L1 | syk2_ecoli | sys_ecoli  | lysU | serS |
| P0A853 | syk2_ecoli | tnaa_ecoli | lysU | tnaA |
| P32057 | syk2_ecoli | wcai_ecoli | lysU | wcaI |
| P0A8G6 | syk2_ecoli | wrba_ecoli | lysU | wrbA |
| P77169 | syk2_ecoli | yagj_ecoli | lysU | yagJ |
| P76185 | syk2_ecoli | ydhj_ecoli | lysU | ydhJ |
| P33346 | syk2_ecoli | yehi_ecoli | lysU | yehI |
| P0AD33 | syk2_ecoli | yfcz_ecoli | lysU | yfcZ |
| P0ADU5 | syk2_ecoli | ygiw_ecoli | lysU | ygiW |
| P37662 | syk2_ecoli | yhjx_ecoli | lysU | yhjX |
|        |            |            |      |      |
| P0AE18 | syl_ecoli  | ampm_ecoli | leuS | map  |
| P0A6F5 | syl_ecoli  | ch60_ecoli | leuS | groL |
| P33129 | syl_ecoli  | htre_ecoli | leuS | htrE |
| P16431 | syl_ecoli  | hyce_ecoli | leuS | hycE |
| P0A7J7 | syl_ecoli  | rl11_ecoli | leuS | rpIK |
| P0ADZ0 | syl_ecoli  | rl23_ecoli | leuS | rpIW |
| P60438 | syl_ecoli  | rl3_ecoli  | leuS | rpIC |
| P60723 | syl_ecoli  | rl4_ecoli  | leuS | rpID |
| P0A7K2 | syl_ecoli  | rl7_ecoli  | leuS | rpIL |
| P0A7R5 | syl_ecoli  | rs10_ecoli | leuS | rpsJ |
| P0A7T3 | syl_ecoli  | rs16_ecoli | leuS | rpsP |

|          |                           |                             |      |      |
|----------|---------------------------|-----------------------------|------|------|
| P0A7V0   | <a href="#">syl_ecoli</a> | <a href="#">rs2_ecoli</a>   | leuS | rpsB |
| P76245   | <a href="#">syl_ecoli</a> | <a href="#">yeap_ecoli</a>  | leuS | yeaP |
| P32689   | <a href="#">syl_ecoli</a> | <a href="#">yjbh_ecoli</a>  | leuS | yjbH |
| P60422   | <a href="#">sym_ecoli</a> | <a href="#">rl2_ecoli</a>   | metG | rplB |
| P18843   | <a href="#">syn_ecoli</a> | <a href="#">nade_ecoli</a>  | asnS | nadE |
| P0A6F5   | <a href="#">syp_ecoli</a> | <a href="#">ch60_ecoli</a>  | proS | groL |
| P0A988   | <a href="#">syp_ecoli</a> | <a href="#">dpo3b_ecoli</a> | proS | dnaN |
| P15070   | <a href="#">syp_ecoli</a> | <a href="#">fliin_ecoli</a> | proS | fliN |
| P0AFG8   | <a href="#">syp_ecoli</a> | <a href="#">odp1_ecoli</a>  | proS | aceE |
| P63284-1 | <a href="#">syp_ecoli</a> | P63284-1                    | proS | -    |
| P0AC41   | <a href="#">syr_ecoli</a> | <a href="#">dhsa_ecoli</a>  | argS | sdhA |
| P33602   | <a href="#">syr_ecoli</a> | <a href="#">nuog_ecoli</a>  | argS | nuoG |
| P0AFG8   | <a href="#">syr_ecoli</a> | <a href="#">odp1_ecoli</a>  | argS | aceE |
| P07395   | <a href="#">syr_ecoli</a> | <a href="#">syfb_ecoli</a>  | argS | pheT |
| P77746   | <a href="#">syr_ecoli</a> | <a href="#">ybdo_ecoli</a>  | argS | ybdO |
| P77561   | <a href="#">syr_ecoli</a> | <a href="#">ydep_ecoli</a>  | argS | ydeP |
| P37652   | <a href="#">sys_ecoli</a> | <a href="#">bcsb_ecoli</a>  | serS | bcsB |
| P0A6F5   | <a href="#">sys_ecoli</a> | <a href="#">ch60_ecoli</a>  | serS | groL |
| P0C8J8   | <a href="#">sys_ecoli</a> | <a href="#">gatz_ecoli</a>  | serS | gatZ |
| P0A7H0   | <a href="#">sys_ecoli</a> | <a href="#">recf_ecoli</a>  | serS | recF |
| P33030   | <a href="#">sys_ecoli</a> | <a href="#">yeir_ecoli</a>  | serS | yeiR |
| P37908   | <a href="#">sys_ecoli</a> | <a href="#">yfjd_ecoli</a>  | serS | yfjD |
| P0AF82   | <a href="#">sys_ecoli</a> | <a href="#">yjfn_ecoli</a>  | serS | yjfn |
| P0A6Y8   | <a href="#">syt_ecoli</a> | <a href="#">dnak_ecoli</a>  | thrS | dnaK |
| P0A6P9   | <a href="#">syt_ecoli</a> | <a href="#">eno_ecoli</a>   | thrS | eno  |
| P0C054   | <a href="#">syt_ecoli</a> | <a href="#">ibpa_ecoli</a>  | thrS | ibpA |
| P18843   | <a href="#">syt_ecoli</a> | <a href="#">nade_ecoli</a>  | thrS | nadE |
| P0A7H6   | <a href="#">syt_ecoli</a> | <a href="#">recr_ecoli</a>  | thrS | recR |
| P0A7L0   | <a href="#">syt_ecoli</a> | <a href="#">rl1_ecoli</a>   | thrS | rplA |
| P0A7L0   | <a href="#">syt_ecoli</a> | <a href="#">rl1_ecoli</a>   | thrS | rplA |
| P0AA10   | <a href="#">syt_ecoli</a> | <a href="#">rl13_ecoli</a>  | thrS | rplM |
| P0A7K6   | <a href="#">syt_ecoli</a> | <a href="#">rl19_ecoli</a>  | thrS | rplS |
| P61175   | <a href="#">syt_ecoli</a> | <a href="#">rl22_ecoli</a>  | thrS | rplV |
| P60438   | <a href="#">syt_ecoli</a> | <a href="#">rl3_ecoli</a>   | thrS | rplC |
| P0A7R1   | <a href="#">syt_ecoli</a> | <a href="#">rl9_ecoli</a>   | thrS | rplI |
| P0AG07   | <a href="#">syt_ecoli</a> | <a href="#">rpe_ecoli</a>   | thrS | rpe  |
| P0AG67   | <a href="#">syt_ecoli</a> | <a href="#">rs1_ecoli</a>   | thrS | rpsA |

|        |                            |                            |      |      |
|--------|----------------------------|----------------------------|------|------|
| P0A7R5 | <a href="#">syt_ecoli</a>  | <a href="#">rs10_ecoli</a> | thrS | rpsJ |
| P0A7S9 | <a href="#">syt_ecoli</a>  | <a href="#">rs13_ecoli</a> | thrS | rpsM |
| P0AG59 | <a href="#">syt_ecoli</a>  | <a href="#">rs14_ecoli</a> | thrS | rpsN |
| P0A7V0 | <a href="#">syt_ecoli</a>  | <a href="#">rs2_ecoli</a>  | thrS | rpsB |
| P0A7U7 | <a href="#">syt_ecoli</a>  | <a href="#">rs20_ecoli</a> | thrS | rpsT |
| P0A7V3 | <a href="#">syt_ecoli</a>  | <a href="#">rs3_ecoli</a>  | thrS | rpsC |
| P0A7W1 | <a href="#">syt_ecoli</a>  | <a href="#">rs5_ecoli</a>  | thrS | rpsE |
| P02358 | <a href="#">syt_ecoli</a>  | <a href="#">rs6_ecoli</a>  | thrS | rpsF |
| P02359 | <a href="#">syt_ecoli</a>  | <a href="#">rs7_ecoli</a>  | thrS | rpsG |
| P0ACC9 | <a href="#">syt_ecoli</a>  | <a href="#">wcab_ecoli</a> | thrS | wcaB |
| P46142 | <a href="#">syt_ecoli</a>  | <a href="#">yggm_ecoli</a> | thrS | yggM |
| P0AGK4 | <a href="#">syt_ecoli</a>  | <a href="#">yhby_ecoli</a> | thrS | yhbY |
| P23839 | <a href="#">syt_ecoli</a>  | <a href="#">yicc_ecoli</a> | thrS | yicC |
|        |                            |                            |      |      |
| P46837 | <a href="#">syv_ecoli</a>  | <a href="#">yhgf_ecoli</a> | valS | yhgF |
|        |                            |                            |      |      |
| P0AE18 | <a href="#">syw_ecoli</a>  | <a href="#">ampm_ecoli</a> | trpS | map  |
| P0ACV2 | <a href="#">syw_ecoli</a>  | <a href="#">ddg_ecoli</a>  | trpS | ddg  |
| P37005 | <a href="#">syw_ecoli</a>  | <a href="#">last_ecoli</a> | trpS | lasT |
| P18843 | <a href="#">syw_ecoli</a>  | <a href="#">nade_ecoli</a> | trpS | nadE |
| P0A7B1 | <a href="#">syw_ecoli</a>  | <a href="#">ppk_ecoli</a>  | trpS | ppk  |
| P0AA10 | <a href="#">syw_ecoli</a>  | <a href="#">rl13_ecoli</a> | trpS | rpIM |
| P61175 | <a href="#">syw_ecoli</a>  | <a href="#">rl22_ecoli</a> | trpS | rpIV |
| P60438 | <a href="#">syw_ecoli</a>  | <a href="#">rl3_ecoli</a>  | trpS | rpIC |
| P0A7V0 | <a href="#">syw_ecoli</a>  | <a href="#">rs2_ecoli</a>  | trpS | rpsB |
| P0A7V8 | <a href="#">syw_ecoli</a>  | <a href="#">rs4_ecoli</a>  | trpS | rpsD |
| P0A7W1 | <a href="#">syw_ecoli</a>  | <a href="#">rs5_ecoli</a>  | trpS | rpsE |
| P16456 | <a href="#">syw_ecoli</a>  | <a href="#">seld_ecoli</a> | trpS | seld |
|        |                            |                            |      |      |
| P12999 | <a href="#">syy_ecoli</a>  | <a href="#">bioc_ecoli</a> | tyrS | bioC |
| P0AC41 | <a href="#">syy_ecoli</a>  | <a href="#">dhsa_ecoli</a> | tyrS | sdhA |
| P0A6Y8 | <a href="#">syy_ecoli</a>  | <a href="#">dnak_ecoli</a> | tyrS | dnaK |
| P0A6Y8 | <a href="#">syy_ecoli</a>  | <a href="#">dnak_ecoli</a> | tyrS | dnaK |
| P18843 | <a href="#">syy_ecoli</a>  | <a href="#">nade_ecoli</a> | tyrS | nadE |
| P0AFG6 | <a href="#">syy_ecoli</a>  | <a href="#">odo2_ecoli</a> | tyrS | sucB |
| P10408 | <a href="#">syy_ecoli</a>  | <a href="#">seca_ecoli</a> | tyrS | secA |
| P45955 | <a href="#">syy_ecoli</a>  | <a href="#">ybgf_ecoli</a> | tyrS | ybgF |
|        |                            |                            |      |      |
| P77188 | <a href="#">tala_ecoli</a> | <a href="#">matc_ecoli</a> | talA | matC |
| P18843 | <a href="#">tala_ecoli</a> | <a href="#">nade_ecoli</a> | talA | nadE |
|        |                            |                            |      |      |
| P0AEX9 | <a href="#">talb_ecoli</a> | <a href="#">male_ecoli</a> | talB | maIE |

|        |            |            |      |      |
|--------|------------|------------|------|------|
| P0A6F5 | tas_ecoli  | ch60_ecoli | tas  | groL |
| P31678 | tas_ecoli  | otsb_ecoli | tas  | otsB |
| P0A6F5 | tdh_ecoli  | ch60_ecoli | tdh  | groL |
| P06846 | tdh_ecoli  | ebgr_ecoli | tdh  | ebgR |
| P18843 | tdh_ecoli  | nade_ecoli | tdh  | nadE |
| P0A6F5 | tehb_ecoli | ch60_ecoli | tehB | groL |
| P33940 | tehb_ecoli | mqa_ecoli  | tehB | mqa  |
| P60422 | tehb_ecoli | rl2_ecoli  | tehB | rplB |
| P0ADK8 | tehb_ecoli | yibL_ecoli | tehB | yibL |
| P03960 | tesb_ecoli | atkb_ecoli | tesB | kdpB |
| P00722 | tesb_ecoli | bgaL_ecoli | tesB | lacZ |
| P0A6Y8 | tesb_ecoli | dnak_ecoli | tesB | dnaK |
| P18843 | tesb_ecoli | nade_ecoli | tesB | nadE |
| P0AG90 | tesb_ecoli | secD_ecoli | tesB | secD |
| P37653 | tgt_ecoli  | bcsA_ecoli | tgt  | bcsA |
| P0A6F5 | tgt_ecoli  | ch60_ecoli | tgt  | groL |
| P0ACF0 | tgt_ecoli  | dbha_ecoli | tgt  | hupA |
| P0ACF4 | tgt_ecoli  | dbhb_ecoli | tgt  | hupB |
| P0A9P6 | tgt_ecoli  | dead_ecoli | tgt  | deaD |
| P75969 | tgt_ecoli  | inte_ecoli | tgt  | intE |
| P08997 | tgt_ecoli  | masy_ecoli | tgt  | aceB |
| P18843 | tgt_ecoli  | nade_ecoli | tgt  | nadE |
| P0AFG8 | tgt_ecoli  | odp1_ecoli | tgt  | aceE |
| P06959 | tgt_ecoli  | odp2_ecoli | tgt  | aceF |
| P0A7L0 | tgt_ecoli  | rl1_ecoli  | tgt  | rplA |
| P0AA10 | tgt_ecoli  | rl13_ecoli | tgt  | rplM |
| P0AG44 | tgt_ecoli  | rl17_ecoli | tgt  | rplQ |
| P0A7K6 | tgt_ecoli  | rl19_ecoli | tgt  | rplS |
| P60422 | tgt_ecoli  | rl2_ecoli  | tgt  | rplB |
| P60422 | tgt_ecoli  | rl2_ecoli  | tgt  | rplB |
| P0A7L3 | tgt_ecoli  | rl20_ecoli | tgt  | rplT |
| P0AG48 | tgt_ecoli  | rl21_ecoli | tgt  | rplU |
| P61175 | tgt_ecoli  | rl22_ecoli | tgt  | rplV |
| P60624 | tgt_ecoli  | rl24_ecoli | tgt  | rplX |
| P0A7M2 | tgt_ecoli  | rl28_ecoli | tgt  | rpmB |
| P60438 | tgt_ecoli  | rl3_ecoli  | tgt  | rplC |
| P60723 | tgt_ecoli  | rl4_ecoli  | tgt  | rplD |

|        |            |             |      |      |
|--------|------------|-------------|------|------|
| P0A7K2 | tgt_ecoli  | rl7_ecoli   | tgt  | rpIL |
| P0A7R1 | tgt_ecoli  | rl9_ecoli   | tgt  | rpII |
| P0A7R1 | tgt_ecoli  | rl9_ecoli   | tgt  | rpII |
| P75864 | tgt_ecoli  | rlml_ecoli  | tgt  | rlmL |
| P37765 | tgt_ecoli  | rlub_ecoli  | tgt  | rluB |
| P0A8V2 | tgt_ecoli  | rpob_ecoli  | tgt  | rpoB |
| P0AG67 | tgt_ecoli  | rs1_ecoli   | tgt  | rpsA |
| P0A7S3 | tgt_ecoli  | rs12_ecoli  | tgt  | rpsL |
| P0AG59 | tgt_ecoli  | rs14_ecoli  | tgt  | rpsN |
| P0A7W1 | tgt_ecoli  | rs5_ecoli   | tgt  | rpsE |
| P02359 | tgt_ecoli  | rs7_ecoli   | tgt  | rpsG |
| P0A832 | tgt_ecoli  | ssrp_ecoli  | tgt  | smpB |
| P0AGJ5 | tgt_ecoli  | yfif_ecoli  | tgt  | yfiF |
| P0AGJ5 | tgt_ecoli  | yfif_ecoli  | tgt  | yfiF |
|        |            |             |      |      |
| P0A6Y8 | thga_ecoli | dnak_ecoli  | lacA | dnaK |
| P0A717 | thga_ecoli | kprs_ecoli  | lacA | prs  |
|        |            |             |      |      |
| P22731 | thii_ecoli | livf_ecoli  | thiI | livF |
| P0A7L0 | thii_ecoli | rl1_ecoli   | thiI | rplA |
| P60422 | thii_ecoli | rl2_ecoli   | thiI | rplB |
|        |            |             |      |      |
| P0A6F5 | thik_ecoli | ch60_ecoli  | thiK | groL |
| P45395 | thik_ecoli | kdsd_ecoli  | thiK | kdsD |
| P0A7J0 | thik_ecoli | ribb_ecoli  | thiK | ribB |
| P0A7V8 | thik_ecoli | rs4_ecoli   | thiK | rpsD |
| P0A9K9 | thik_ecoli | slyd_ecoli  | thiK | slyD |
|        |            |             |      |      |
| P05052 | thil_ecoli | appy_ecoli  | thiL | appY |
| P0A6F5 | thil_ecoli | ch60_ecoli  | thiL | groL |
| P0A972 | thil_ecoli | cspe_ecoli  | thiL | cspE |
| P18843 | thil_ecoli | nade_ecoli  | thiL | nadE |
| P24173 | thil_ecoli | rfac_ecoli  | thiL | rfaC |
| P0A7M2 | thil_ecoli | rl28_ecoli  | thiL | rpmB |
| P0A9K9 | thil_ecoli | slyd_ecoli  | thiL | slyD |
| P0A843 | thil_ecoli | tate_ecoli  | thiL | tatE |
|        |            |             |      |      |
| P36683 | thio_ecoli | acon2_ecoli | trxA | acnB |
| P36683 | thio_ecoli | acon2_ecoli | trxA | acnB |
| P36683 | thio_ecoli | acon2_ecoli | trxA | acnB |
| P22333 | thio_ecoli | add_ecoli   | trxA | add  |
| P39180 | thio_ecoli | ag43_ecoli  | trxA | flu  |
| P0AB71 | thio_ecoli | alf_ecoli   | trxA | fbaA |

|        |            |             |      |      |
|--------|------------|-------------|------|------|
| POABB0 | thio_ecoli | atpa_ecoli  | trxA | atpA |
| POABB4 | thio_ecoli | atpb_ecoli  | trxA | atpD |
| POABB4 | thio_ecoli | atpb_ecoli  | trxA | atpD |
| P00722 | thio_ecoli | bgal_ecoli  | trxA | lacZ |
| P00722 | thio_ecoli | bgal_ecoli  | trxA | lacZ |
| POA6F9 | thio_ecoli | ch10_ecoli  | trxA | groS |
| POA6G7 | thio_ecoli | clpp_ecoli  | trxA | clpP |
| POA9X9 | thio_ecoli | cspa_ecoli  | trxA | cspA |
| POA9D8 | thio_ecoli | dapd_ecoli  | trxA | dapD |
| POA9D8 | thio_ecoli | dapd_ecoli  | trxA | dapD |
| POACF4 | thio_ecoli | dbhb_ecoli  | trxA | hupB |
| POAC41 | thio_ecoli | dhsa_ecoli  | trxA | sdhA |
| POABS1 | thio_ecoli | dksa_ecoli  | trxA | dksA |
| POA6M8 | thio_ecoli | efg_ecoli   | trxA | fusA |
| POA6M8 | thio_ecoli | efg_ecoli   | trxA | fusA |
| POA6N4 | thio_ecoli | efp_ecoli   | trxA | efp  |
| POA6P1 | thio_ecoli | efts_ecoli  | trxA | tsf  |
| POA6P9 | thio_ecoli | eno_ecoli   | trxA | eno  |
| POA6P9 | thio_ecoli | eno_ecoli   | trxA | eno  |
| POA6Q3 | thio_ecoli | faba_ecoli  | trxA | fabA |
| POA6Q3 | thio_ecoli | faba_ecoli  | trxA | fabA |
| POAEK2 | thio_ecoli | fabg_ecoli  | trxA | fabG |
| POAEK4 | thio_ecoli | fabi_ecoli  | trxA | fabI |
| POA6Q6 | thio_ecoli | fabz_ecoli  | trxA | fabZ |
| P21177 | thio_ecoli | fadb_ecoli  | trxA | fadB |
| P32176 | thio_ecoli | fdog_ecoli  | trxA | fdoG |
| POA9L3 | thio_ecoli | fkbb_ecoli  | trxA | fkIB |
| POA9A6 | thio_ecoli | ftsZ_ecoli  | trxA | ftsZ |
| POA9A9 | thio_ecoli | fur_ecoli   | trxA | fur  |
| POA9B2 | thio_ecoli | g3p1_ecoli  | trxA | gapA |
| POA9B2 | thio_ecoli | g3p1_ecoli  | trxA | gapA |
| P31120 | thio_ecoli | glmm_ecoli  | trxA | glmM |
| POACC7 | thio_ecoli | glmu_ecoli  | trxA | glmU |
| POA6H5 | thio_ecoli | hslu_ecoli  | trxA | hslU |
| POA6H5 | thio_ecoli | hslu_ecoli  | trxA | hslU |
| POA6Z3 | thio_ecoli | htpg_ecoli  | trxA | htpG |
| POA6Z3 | thio_ecoli | htpg_ecoli  | trxA | htpG |
| P08200 | thio_ecoli | idh_ecoli   | trxA | icd  |
| P08200 | thio_ecoli | idh_ecoli   | trxA | icd  |
| P13029 | thio_ecoli | katg_ecoli  | trxA | katG |
| P23331 | thio_ecoli | kith_ecoli  | trxA | tdk  |
| P21599 | thio_ecoli | kpyk2_ecoli | trxA | pykA |
| P02943 | thio_ecoli | lamb_ecoli  | trxA | lamB |
| POA9V1 | thio_ecoli | lptb_ecoli  | trxA | lptB |
| POAEX9 | thio_ecoli | male_ecoli  | trxA | malE |



|        |            |             |      |      |
|--------|------------|-------------|------|------|
| P0AAG8 | thio_ecoli | mgla_ecoli  | trxA | mgla |
| P0AAG8 | thio_ecoli | mgla_ecoli  | trxA | mgla |
| P33940 | thio_ecoli | mgo_ecoli   | trxA | mgo  |
| P33940 | thio_ecoli | mgo_ecoli   | trxA | mgo  |
| P0A9X4 | thio_ecoli | mreb_ecoli  | trxA | mreB |
| P0A763 | thio_ecoli | ndk_ecoli   | trxA | ndk  |
| P28903 | thio_ecoli | nrdD_ecoli  | trxA | nrdD |
| P0A8D0 | thio_ecoli | nrdR_ecoli  | trxA | nrdR |
| P0AFG0 | thio_ecoli | nusG_ecoli  | trxA | nusG |
| P0AFG0 | thio_ecoli | nusG_ecoli  | trxA | nusG |
| P42641 | thio_ecoli | obg_ecoli   | trxA | obgE |
| P0A910 | thio_ecoli | ompa_ecoli  | trxA | ompA |
| P06996 | thio_ecoli | ompc_ecoli  | trxA | ompC |
| P02931 | thio_ecoli | ompf_ecoli  | trxA | ompF |
| P0AA16 | thio_ecoli | ompr_ecoli  | trxA | ompR |
| P23865 | thio_ecoli | prc_ecoli   | trxA | prc  |
| P69783 | thio_ecoli | ptga_ecoli  | trxA | crr  |
| P69783 | thio_ecoli | ptga_ecoli  | trxA | crr  |
| P09546 | thio_ecoli | puta_ecoli  | trxA | putA |
| P0A7E9 | thio_ecoli | pyrH_ecoli  | trxA | pyrH |
| P02925 | thio_ecoli | rbsB_ecoli  | trxA | rbsB |
| P69407 | thio_ecoli | rbsB_ecoli  | trxA | rbsB |
| P69407 | thio_ecoli | rbsB_ecoli  | trxA | rbsB |
| P0A7G6 | thio_ecoli | reca_ecoli  | trxA | recA |
| P0A7G6 | thio_ecoli | reca_ecoli  | trxA | recA |
| P00452 | thio_ecoli | rir1_ecoli  | trxA | nrdA |
| P0A800 | thio_ecoli | rpoz_ecoli  | trxA | rpoZ |
| P0A800 | thio_ecoli | rpoz_ecoli  | trxA | rpoZ |
| P30744 | thio_ecoli | sdhm_ecoli  | trxA | sdaB |
| P0A9K9 | thio_ecoli | slyD_ecoli  | trxA | slyD |
| P0A9K9 | thio_ecoli | slyD_ecoli  | trxA | slyD |
| P00448 | thio_ecoli | sodM_ecoli  | trxA | sodA |
| P0AGD7 | thio_ecoli | srp54_ecoli | trxA | ffh  |
| P0AGD7 | thio_ecoli | srp54_ecoli | trxA | ffh  |
| P27306 | thio_ecoli | sthA_ecoli  | trxA | sthA |
| P27306 | thio_ecoli | sthA_ecoli  | trxA | sthA |
| P0A836 | thio_ecoli | succ_ecoli  | trxA | sucC |
| P0A836 | thio_ecoli | succ_ecoli  | trxA | sucC |
| P0AGE9 | thio_ecoli | sucD_ecoli  | trxA | sucD |
| P0AGE9 | thio_ecoli | sucD_ecoli  | trxA | sucD |
| P0A870 | thio_ecoli | talB_ecoli  | trxA | talB |
| P0A853 | thio_ecoli | tnaA_ecoli  | trxA | tnaA |
| P0A858 | thio_ecoli | tpis_ecoli  | trxA | tpiA |
| P0A862 | thio_ecoli | tpx_ecoli   | trxA | tpx  |
| P0A9P4 | thio_ecoli | trxB_ecoli  | trxA | trxB |

|        |            |            |      |      |
|--------|------------|------------|------|------|
| P0A887 | thio_ecoli | ubie_ecoli | trxA | ubiE |
| P12758 | thio_ecoli | udp_ecoli  | trxA | udp  |
| P0A8E7 | thio_ecoli | yajq_ecoli | trxA | yajQ |
| P0A8E7 | thio_ecoli | yajq_ecoli | trxA | yajQ |
| P0A8J4 | thio_ecoli | ybed_ecoli | trxA | ybeD |
| P0A8J4 | thio_ecoli | ybed_ecoli | trxA | ybeD |
| P0ACY1 | thio_ecoli | ydja_ecoli | trxA | ydjA |
| P33218 | thio_ecoli | yebe_ecoli | trxA | yebE |
| P24203 | thio_ecoli | yjia_ecoli | trxA | yjiA |
| P77475 | thio_ecoli | yqab_ecoli | trxA | yqaB |

|        |            |           |      |      |
|--------|------------|-----------|------|------|
| P0A6M8 | thrc_ecoli | efg_ecoli | thrC | fusA |
|--------|------------|-----------|------|------|

|        |           |            |     |      |
|--------|-----------|------------|-----|------|
| P31441 | tig_ecoli | adec_ecoli | tig | ade  |
| P00561 | tig_ecoli | ak1h_ecoli | tig | thrA |
| P18335 | tig_ecoli | argd_ecoli | tig | argD |
| P22106 | tig_ecoli | asnb_ecoli | tig | asnB |
| P0AC38 | tig_ecoli | aspa_ecoli | tig | aspA |
| P09053 | tig_ecoli | avta_ecoli | tig | avtA |
| P00722 | tig_ecoli | bgal_ecoli | tig | lacZ |
| P0A6F1 | tig_ecoli | cara_ecoli | tig | carA |
| P00968 | tig_ecoli | carb_ecoli | tig | carB |
| P36659 | tig_ecoli | cbpa_ecoli | tig | cbpA |
| P0A6J5 | tig_ecoli | dada_ecoli | tig | dadA |
| P00861 | tig_ecoli | dcda_ecoli | tig | lysA |
| P0AC41 | tig_ecoli | dhsa_ecoli | tig | sdhA |
| P0AC41 | tig_ecoli | dhsa_ecoli | tig | sdhA |
| P07014 | tig_ecoli | dhsb_ecoli | tig | sdhB |
| P0A6Q3 | tig_ecoli | faba_ecoli | tig | fabA |
| P21177 | tig_ecoli | fadb_ecoli | tig | fadB |
| P0ABY2 | tig_ecoli | flit_ecoli | tig | fliT |
| P05523 | tig_ecoli | fpg_ecoli  | tig | mutM |
| P0ACP1 | tig_ecoli | frur_ecoli | tig | fruR |
| P0A998 | tig_ecoli | ftna_ecoli | tig | ftnA |
| P0AAI3 | tig_ecoli | ftsh_ecoli | tig | ftsH |
| P0A9B2 | tig_ecoli | g3p1_ecoli | tig | gapA |
| P0A9S3 | tig_ecoli | gatd_ecoli | tig | gatD |
| P0C8J8 | tig_ecoli | gatz_ecoli | tig | gatZ |
| P0A9S5 | tig_ecoli | glda_ecoli | tig | gldA |
| P0A6V8 | tig_ecoli | glk_ecoli  | tig | glk  |
| P0AER3 | tig_ecoli | gtj_ecoli  | tig | gtJ  |

|        |                           |                            |     |      |
|--------|---------------------------|----------------------------|-----|------|
| P06987 | <a href="#">tig_ecoli</a> | <a href="#">his7_ecoli</a> | tig | hisB |
| P0A6Z3 | <a href="#">tig_ecoli</a> | <a href="#">htpg_ecoli</a> | tig | htpG |
| Q46893 | <a href="#">tig_ecoli</a> | <a href="#">ispd_ecoli</a> | tig | ispD |
| P69441 | <a href="#">tig_ecoli</a> | <a href="#">kad_ecoli</a>  | tig | adk  |
| P23331 | <a href="#">tig_ecoli</a> | <a href="#">kith_ecoli</a> | tig | tdk  |
| P45578 | <a href="#">tig_ecoli</a> | <a href="#">luxs_ecoli</a> | tig | luxS |
| P77791 | <a href="#">tig_ecoli</a> | <a href="#">maa_ecoli</a>  | tig | maa  |
| P69741 | <a href="#">tig_ecoli</a> | <a href="#">mbht_ecoli</a> | tig | hybO |
| P0A9X4 | <a href="#">tig_ecoli</a> | <a href="#">mreb_ecoli</a> | tig | mreB |
| P18843 | <a href="#">tig_ecoli</a> | <a href="#">nade_ecoli</a> | tig | nadE |
| P45425 | <a href="#">tig_ecoli</a> | <a href="#">nank_ecoli</a> | tig | nanK |
| P19318 | <a href="#">tig_ecoli</a> | <a href="#">nary_ecoli</a> | tig | narY |
| P19319 | <a href="#">tig_ecoli</a> | <a href="#">narz_ecoli</a> | tig | narZ |
| P32664 | <a href="#">tig_ecoli</a> | <a href="#">nudc_ecoli</a> | tig | nudC |
| P0AFD1 | <a href="#">tig_ecoli</a> | <a href="#">nuoe_ecoli</a> | tig | nuoE |
| P0AFG6 | <a href="#">tig_ecoli</a> | <a href="#">odo2_ecoli</a> | tig | sucB |
| P0AFG8 | <a href="#">tig_ecoli</a> | <a href="#">odp1_ecoli</a> | tig | aceE |
| P0A910 | <a href="#">tig_ecoli</a> | <a href="#">ompa_ecoli</a> | tig | ompA |
| P0A910 | <a href="#">tig_ecoli</a> | <a href="#">ompa_ecoli</a> | tig | ompA |
| P02931 | <a href="#">tig_ecoli</a> | <a href="#">ompf_ecoli</a> | tig | ompF |
| P33136 | <a href="#">tig_ecoli</a> | <a href="#">opgg_ecoli</a> | tig | mdoG |
| P0AFI7 | <a href="#">tig_ecoli</a> | <a href="#">pdxh_ecoli</a> | tig | pdxH |
| P09373 | <a href="#">tig_ecoli</a> | <a href="#">pflb_ecoli</a> | tig | pflB |
| P23538 | <a href="#">tig_ecoli</a> | <a href="#">ppsa_ecoli</a> | tig | ppsA |
| P0AG82 | <a href="#">tig_ecoli</a> | <a href="#">psts_ecoli</a> | tig | pstS |
| P69828 | <a href="#">tig_ecoli</a> | <a href="#">ptka_ecoli</a> | tig | gatA |
| P09546 | <a href="#">tig_ecoli</a> | <a href="#">puta_ecoli</a> | tig | putA |
| P0AG30 | <a href="#">tig_ecoli</a> | <a href="#">rho_ecoli</a>  | tig | rho  |
| P16918 | <a href="#">tig_ecoli</a> | <a href="#">rhsc_ecoli</a> | tig | rhsC |
| P16919 | <a href="#">tig_ecoli</a> | <a href="#">rhsd_ecoli</a> | tig | rhsD |
| P0A7L0 | <a href="#">tig_ecoli</a> | <a href="#">rl1_ecoli</a>  | tig | rplA |
| P0A7J3 | <a href="#">tig_ecoli</a> | <a href="#">rl10_ecoli</a> | tig | rplJ |
| P0AA10 | <a href="#">tig_ecoli</a> | <a href="#">rl13_ecoli</a> | tig | rplM |
| P0ADY3 | <a href="#">tig_ecoli</a> | <a href="#">rl14_ecoli</a> | tig | rplN |
| P0ADY3 | <a href="#">tig_ecoli</a> | <a href="#">rl14_ecoli</a> | tig | rplN |
| P02413 | <a href="#">tig_ecoli</a> | <a href="#">rl15_ecoli</a> | tig | rplO |
| P0ADY7 | <a href="#">tig_ecoli</a> | <a href="#">rl16_ecoli</a> | tig | rplP |
| P0AG44 | <a href="#">tig_ecoli</a> | <a href="#">rl17_ecoli</a> | tig | rplQ |
| P60422 | <a href="#">tig_ecoli</a> | <a href="#">rl2_ecoli</a>  | tig | rplB |
| P61175 | <a href="#">tig_ecoli</a> | <a href="#">rl22_ecoli</a> | tig | rplV |
| P0ADZ0 | <a href="#">tig_ecoli</a> | <a href="#">rl23_ecoli</a> | tig | rplW |
| P0A7M2 | <a href="#">tig_ecoli</a> | <a href="#">rl28_ecoli</a> | tig | rpmB |
| P0A7M2 | <a href="#">tig_ecoli</a> | <a href="#">rl28_ecoli</a> | tig | rpmB |
| P0A7M6 | <a href="#">tig_ecoli</a> | <a href="#">rl29_ecoli</a> | tig | rpmC |
| P60438 | <a href="#">tig_ecoli</a> | <a href="#">rl3_ecoli</a>  | tig | rplC |

|        |           |            |     |      |
|--------|-----------|------------|-----|------|
| P60438 | tig_ecoli | rl3_ecoli  | tig | rplC |
| P60723 | tig_ecoli | rl4_ecoli  | tig | rplD |
| P60723 | tig_ecoli | rl4_ecoli  | tig | rplD |
| P62399 | tig_ecoli | rl5_ecoli  | tig | rplE |
| P0AG55 | tig_ecoli | rl6_ecoli  | tig | rplF |
| P0AG55 | tig_ecoli | rl6_ecoli  | tig | rplF |
| P0A7K2 | tig_ecoli | rl7_ecoli  | tig | rplL |
| P0A7Y0 | tig_ecoli | rnc_ecoli  | tig | rnc  |
| P0A8V2 | tig_ecoli | rpob_ecoli | tig | rpoB |
| P0A8T7 | tig_ecoli | rpoc_ecoli | tig | rpoC |
| P0AG67 | tig_ecoli | rs1_ecoli  | tig | rpsA |
| P0AG67 | tig_ecoli | rs1_ecoli  | tig | rpsA |
| P0A7R5 | tig_ecoli | rs10_ecoli | tig | rpsJ |
| P0A7R9 | tig_ecoli | rs11_ecoli | tig | rpsK |
| P0AG59 | tig_ecoli | rs14_ecoli | tig | rpsN |
| P0A7U3 | tig_ecoli | rs19_ecoli | tig | rpsS |
| P0A7V0 | tig_ecoli | rs2_ecoli  | tig | rpsB |
| P0A7V0 | tig_ecoli | rs2_ecoli  | tig | rpsB |
| P68679 | tig_ecoli | rs21_ecoli | tig | rpsU |
| P68679 | tig_ecoli | rs21_ecoli | tig | rpsU |
| P0A7V3 | tig_ecoli | rs3_ecoli  | tig | rpsC |
| P0A7V3 | tig_ecoli | rs3_ecoli  | tig | rpsC |
| P0A7V8 | tig_ecoli | rs4_ecoli  | tig | rpsD |
| P0A7W1 | tig_ecoli | rs5_ecoli  | tig | rpsE |
| P0A7W1 | tig_ecoli | rs5_ecoli  | tig | rpsE |
| P0A7W1 | tig_ecoli | rs5_ecoli  | tig | rpsE |
| P02359 | tig_ecoli | rs7_ecoli  | tig | rpsG |
| P02359 | tig_ecoli | rs7_ecoli  | tig | rpsG |
| P0A7X3 | tig_ecoli | rs9_ecoli  | tig | rpsI |
| P0A7X3 | tig_ecoli | rs9_ecoli  | tig | rpsI |
| P38104 | tig_ecoli | rspa_ecoli | tig | rspA |
| P0A9K9 | tig_ecoli | slyd_ecoli | tig | slyD |
| P0ACQ7 | tig_ecoli | tdca_ecoli | tig | tdcA |
| P07464 | tig_ecoli | thga_ecoli | tig | lacA |
| P06612 | tig_ecoli | top1_ecoli | tig | topA |
| P23003 | tig_ecoli | trma_ecoli | tig | trmA |
| P0A698 | tig_ecoli | uvra_ecoli | tig | uvrA |
| P0A6L7 | tig_ecoli | uxab_ecoli | tig | uxaB |
| P0AB43 | tig_ecoli | ycgl_ecoli | tig | ycgL |
| P76464 | tig_ecoli | yfas_ecoli | tig | yfaS |
| P0AGJ5 | tig_ecoli | yfif_ecoli | tig | yfiF |
| Q47319 | tig_ecoli | yfip_ecoli | tig | yfiP |
| P0ADQ2 | tig_ecoli | yiid_ecoli | tig | yiiD |
| P39280 | tig_ecoli | yjek_ecoli | tig | yjeK |
| P76149 | tig_ecoli | ynei_ecoli | tig | yneI |

|        |            |            |      |      |
|--------|------------|------------|------|------|
| P76208 | tig_ecoli  | ynib_ecoli | tig  | yniB |
| P0A6Y8 | tnaa_ecoli | dnak_ecoli | tnaA | dnak |
| P0ACF0 | top1_ecoli | dbha_ecoli | topA | hupA |
| P0ACF4 | top1_ecoli | dbhb_ecoli | topA | hupB |
| P0A9P0 | top1_ecoli | dldh_ecoli | topA | lpdA |
| P75933 | top1_ecoli | flga_ecoli | topA | flgA |
| P25527 | top1_ecoli | gabp_ecoli | topA | gabP |
| P0A6X3 | top1_ecoli | hfq_ecoli  | topA | hfq  |
| P0ACF8 | top1_ecoli | hns_ecoli  | topA | hns  |
| P37647 | top1_ecoli | kdgk_ecoli | topA | kdgK |
| P75830 | top1_ecoli | maca_ecoli | topA | macA |
| P00490 | top1_ecoli | phsm_ecoli | topA | malP |
| P23830 | top1_ecoli | pss_ecoli  | topA | pssA |
| P21893 | top1_ecoli | recj_ecoli | topA | recJ |
| P15043 | top1_ecoli | recq_ecoli | topA | recQ |
| P27243 | top1_ecoli | rfal_ecoli | topA | rfaL |
| P0A948 | top1_ecoli | rimj_ecoli | topA | rimJ |
| P37765 | top1_ecoli | rlub_ecoli | topA | rluB |
| P0ACI0 | top1_ecoli | rob_ecoli  | topA | rob  |
| P0A7Z4 | top1_ecoli | rpoa_ecoli | topA | rpoA |
| P0A8V2 | top1_ecoli | rpob_ecoli | topA | rpoB |
| P0A8T7 | top1_ecoli | rpoc_ecoli | topA | rpoC |
| P0A8T7 | top1_ecoli | rpoc_ecoli | topA | rpoC |
| P0AGB6 | top1_ecoli | rpoe_ecoli | topA | rpoE |
| P0A800 | top1_ecoli | rpoz_ecoli | topA | rpoZ |
| P52108 | top1_ecoli | rsta_ecoli | topA | rstA |
| P21507 | top1_ecoli | srmB_ecoli | topA | srmB |
| P00957 | top1_ecoli | sya_ecoli  | topA | alaS |
| P07813 | top1_ecoli | syl_ecoli  | topA | leuS |
| P0A9U3 | top1_ecoli | ybit_ecoli | topA | ybiT |
| P0A8Z0 | top1_ecoli | ycia_ecoli | topA | yciA |

|        |                            |                             |      |      |
|--------|----------------------------|-----------------------------|------|------|
| P0A9F3 | <a href="#">tpx_ecoli</a>  | <a href="#">cysb_ecoli</a>  | tpx  | cysB |
| P23524 | <a href="#">tpx_ecoli</a>  | <a href="#">glxk2_ecoli</a> | tpx  | garK |
| P0A894 | <a href="#">trea_ecoli</a> | <a href="#">yhbj_ecoli</a>  | treA | yhbJ |
| P00968 | <a href="#">trec_ecoli</a> | <a href="#">carb_ecoli</a>  | treC | carB |
| P18843 | <a href="#">trec_ecoli</a> | <a href="#">nade_ecoli</a>  | treC | nadE |
| P0AFI7 | <a href="#">trec_ecoli</a> | <a href="#">pdxh_ecoli</a>  | treC | pdxH |
| P60723 | <a href="#">trec_ecoli</a> | <a href="#">rl4_ecoli</a>   | treC | rplD |
| P16659 | <a href="#">trec_ecoli</a> | <a href="#">syp_ecoli</a>   | treC | proS |
| P08956 | <a href="#">trec_ecoli</a> | <a href="#">t1rk_ecoli</a>  | treC | hsdR |
| Q46844 | <a href="#">trec_ecoli</a> | <a href="#">yght_ecoli</a>  | treC | yghT |
| P0A6Y8 | <a href="#">trer_ecoli</a> | <a href="#">dnak_ecoli</a>  | treR | dnaK |
| P32675 | <a href="#">trer_ecoli</a> | <a href="#">pflc_ecoli</a>  | treR | pflC |
| P60422 | <a href="#">trer_ecoli</a> | <a href="#">rl2_ecoli</a>   | treR | rplB |
| P0A7X3 | <a href="#">trer_ecoli</a> | <a href="#">rs9_ecoli</a>   | treR | rpsI |
| P0AB43 | <a href="#">trer_ecoli</a> | <a href="#">ycgl_ecoli</a>  | treR | ycgL |
| P08245 | <a href="#">trer_ecoli</a> | <a href="#">ycih_ecoli</a>  | treR | yciH |
| P0A6F5 | <a href="#">trmb_ecoli</a> | <a href="#">ch60_ecoli</a>  | trmB | groL |
| P0A9P6 | <a href="#">trmb_ecoli</a> | <a href="#">dead_ecoli</a>  | trmB | deaD |
| P0AEE5 | <a href="#">trmb_ecoli</a> | <a href="#">dgal_ecoli</a>  | trmB | mgIB |
| P0A9P0 | <a href="#">trmb_ecoli</a> | <a href="#">dldh_ecoli</a>  | trmB | lpdA |
| P0A6Y8 | <a href="#">trmb_ecoli</a> | <a href="#">dnak_ecoli</a>  | trmB | dnaK |
| P0ABX2 | <a href="#">trmb_ecoli</a> | <a href="#">flgc_ecoli</a>  | trmB | flgC |
| P0AEM4 | <a href="#">trmb_ecoli</a> | <a href="#">flgm_ecoli</a>  | trmB | flgM |
| P32662 | <a href="#">trmb_ecoli</a> | <a href="#">gph_ecoli</a>   | trmB | gph  |
| P43329 | <a href="#">trmb_ecoli</a> | <a href="#">hrpa_ecoli</a>  | trmB | hrpA |
| P0AFG8 | <a href="#">trmb_ecoli</a> | <a href="#">odp1_ecoli</a>  | trmB | aceE |
| P0A9J8 | <a href="#">trmb_ecoli</a> | <a href="#">phea_ecoli</a>  | trmB | pheA |
| P0A9K3 | <a href="#">trmb_ecoli</a> | <a href="#">phol_ecoli</a>  | trmB | ybeZ |
| P23830 | <a href="#">trmb_ecoli</a> | <a href="#">pss_ecoli</a>   | trmB | pssA |
| P0A7J3 | <a href="#">trmb_ecoli</a> | <a href="#">rl10_ecoli</a>  | trmB | rplJ |

|        |            |            |      |      |
|--------|------------|------------|------|------|
| P0AA10 | trmb_ecoli | rl13_ecoli | trmB | rplM |
| P0A7K6 | trmb_ecoli | rl19_ecoli | trmB | rplS |
| P60422 | trmb_ecoli | rl2_ecoli  | trmB | rplB |
| P61175 | trmb_ecoli | rl22_ecoli | trmB | rplV |
| P61175 | trmb_ecoli | rl22_ecoli | trmB | rplV |
| P60624 | trmb_ecoli | rl24_ecoli | trmB | rplX |
| P60438 | trmb_ecoli | rl3_ecoli  | trmB | rplC |
| P60723 | trmb_ecoli | rl4_ecoli  | trmB | rplD |
| P62399 | trmb_ecoli | rl5_ecoli  | trmB | rplE |
| P0AG55 | trmb_ecoli | rl6_ecoli  | trmB | rplF |
| P0A7R1 | trmb_ecoli | rl9_ecoli  | trmB | rplI |
| P75864 | trmb_ecoli | rlml_ecoli | trmB | rlmL |
| P0AG67 | trmb_ecoli | rs1_ecoli  | trmB | rpsA |
| P0A7S9 | trmb_ecoli | rs13_ecoli | trmB | rpsM |
| P0A7T3 | trmb_ecoli | rs16_ecoli | trmB | rpsP |
| P0A7V0 | trmb_ecoli | rs2_ecoli  | trmB | rpsB |
| P0A7U7 | trmb_ecoli | rs20_ecoli | trmB | rpsT |
| P68679 | trmb_ecoli | rs21_ecoli | trmB | rpsU |
| P0A7V3 | trmb_ecoli | rs3_ecoli  | trmB | rpsC |
| P0A7V8 | trmb_ecoli | rs4_ecoli  | trmB | rpsD |
| P0A7W1 | trmb_ecoli | rs5_ecoli  | trmB | rpsE |
| P02358 | trmb_ecoli | rs6_ecoli  | trmB | rpsF |
| P02359 | trmb_ecoli | rs7_ecoli  | trmB | rpsG |
| P02359 | trmb_ecoli | rs7_ecoli  | trmB | rpsG |
| P21507 | trmb_ecoli | srmB_ecoli | trmB | srmB |
| P00962 | trmb_ecoli | syq_ecoli  | trmB | glnS |
| P0AFQ2 | trmb_ecoli | ybhs_ecoli | trmB | ybhS |
| P0AGJ5 | trmb_ecoli | yfif_ecoli | trmB | yfiF |
| P30871 | trmb_ecoli | ygif_ecoli | trmB | ygiF |
| P76092 | trmb_ecoli | ynbc_ecoli | trmB | ynbC |
| P76115 | trmb_ecoli | yncd_ecoli | trmB | yncD |
| P77624 | trmh_ecoli | arcm_ecoli | trmH | yahl |
| P02359 | trmh_ecoli | rs7_ecoli  | trmH | rpsG |
| P0A7X3 | trmh_ecoli | rs9_ecoli  | trmH | rpsI |
| P0A7J3 | trub_ecoli | rl10_ecoli | truB | rplJ |
| P02413 | trub_ecoli | rl15_ecoli | truB | rplO |
| P0AG44 | trub_ecoli | rl17_ecoli | truB | rplQ |
| P60422 | trub_ecoli | rl2_ecoli  | truB | rplB |
| P52062 | trub_ecoli | yggw_ecoli | truB | yggW |
| P18843 | trxb_ecoli | nade_ecoli | trxB | nadE |

|        |            |             |      |      |
|--------|------------|-------------|------|------|
| P0A6F5 | tus_ecoli  | ch60_ecoli  | tus  | groL |
| P0AET8 | tus_ecoli  | hdha_ecoli  | tus  | hdhA |
| P09557 | tusc_ecoli | dicb_ecoli  | tusC | dicB |
| P0ACV6 | tusc_ecoli | mpaa_ecoli  | tusC | mpaA |
| P76154 | tusc_ecoli | ydfk_ecoli  | tusC | ydfK |
| P76073 | tusc_ecoli | ynaE_ecoli  | tusC | ynaE |
| P35340 | tyrr_ecoli | ahpf_ecoli  | tyrR | ahpF |
| P06959 | tyrr_ecoli | odp2_ecoli  | tyrR | aceF |
| P37127 | ubib_ecoli | aega_ecoli  | ubiB | aegA |
| P0A6F5 | ubib_ecoli | ch60_ecoli  | ubiB | groL |
| P0ABH9 | ubib_ecoli | clpa_ecoli  | ubiB | clpA |
| P0ACJ8 | ubib_ecoli | crp_ecoli   | ubiB | crp  |
| P0A6Y8 | ubib_ecoli | dnak_ecoli  | ubiB | dnaK |
| P0AFM6 | ubib_ecoli | pspa_ecoli  | ubiB | pspA |
| P28043 | ubib_ecoli | ssb2_ecolx  | ubiB | ssb  |
| P0A8E5 | ubib_ecoli | yacl_ecoli  | ubiB | yacl |
| P0A6F5 | ubif_ecoli | ch60_ecoli  | ubiF | groL |
| P13035 | ubif_ecoli | glpd_ecoli  | ubiF | glpD |
| P18843 | ubif_ecoli | nade_ecoli  | ubiF | nadE |
| P33230 | ubif_ecoli | ydac_ecoli  | ubiF | ydaC |
| P32176 | udp_ecoli  | fdog_ecoli  | udp  | fdoG |
| P0A6F5 | ular_ecoli | ch60_ecoli  | ulaR | groL |
| P0A6F5 | ular_ecoli | ch60_ecoli  | ulaR | groL |
| P0A6F5 | ular_ecoli | ch60_ecoli  | ulaR | groL |
| P0ACF4 | ular_ecoli | dbhb_ecoli  | ulaR | hupB |
| P0A9P0 | ular_ecoli | dldh_ecoli  | ulaR | lpdA |
| P08622 | ular_ecoli | dnaj_ecoli  | ulaR | dnaJ |
| P0A6Y8 | ular_ecoli | dnak_ecoli  | ulaR | dnaK |
| P75742 | ular_ecoli | dtpd_ecoli  | ulaR | dtpD |
| P0CE47 | ular_ecoli | eftu1_ecoli | ulaR | tufA |
| P0CE47 | ular_ecoli | eftu1_ecoli | ulaR | tufA |
| P03030 | ular_ecoli | lysr_ecoli  | ulaR | lysR |
| P06959 | ular_ecoli | odp2_ecoli  | ulaR | aceF |
| P0A7L0 | ular_ecoli | rl1_ecoli   | ulaR | rplA |



|        |            |             |      |      |
|--------|------------|-------------|------|------|
| P0AA10 | ular_ecoli | rl13_ecoli  | ulaR | rplM |
| P0ADY3 | ular_ecoli | rl14_ecoli  | ulaR | rplN |
| P0A7K6 | ular_ecoli | rl19_ecoli  | ulaR | rplS |
| P0AG48 | ular_ecoli | rl21_ecoli  | ulaR | rplU |
| P61175 | ular_ecoli | rl22_ecoli  | ulaR | rplV |
| P0A7M2 | ular_ecoli | rl28_ecoli  | ulaR | rpmB |
| P60438 | ular_ecoli | rl3_ecoli   | ulaR | rplC |
| P60438 | ular_ecoli | rl3_ecoli   | ulaR | rplC |
| P60723 | ular_ecoli | rl4_ecoli   | ulaR | rplD |
| P0A7K2 | ular_ecoli | rl7_ecoli   | ulaR | rplL |
| P0AG67 | ular_ecoli | rs1_ecoli   | ulaR | rpsA |
| P0A7R5 | ular_ecoli | rs10_ecoli  | ulaR | rpsJ |
| P0A7S3 | ular_ecoli | rs12_ecoli  | ulaR | rpsL |
| P0A7S9 | ular_ecoli | rs13_ecoli  | ulaR | rpsM |
| P0A7S9 | ular_ecoli | rs13_ecoli  | ulaR | rpsM |
| P0AG59 | ular_ecoli | rs14_ecoli  | ulaR | rpsN |
| P0A7U3 | ular_ecoli | rs19_ecoli  | ulaR | rpsS |
| P0A7V0 | ular_ecoli | rs2_ecoli   | ulaR | rpsB |
| P0A7U7 | ular_ecoli | rs20_ecoli  | ulaR | rpsT |
| P0A7V3 | ular_ecoli | rs3_ecoli   | ulaR | rpsC |
| P0A7V8 | ular_ecoli | rs4_ecoli   | ulaR | rpsD |
| P0A7V8 | ular_ecoli | rs4_ecoli   | ulaR | rpsD |
| P0A7W1 | ular_ecoli | rs5_ecoli   | ulaR | rpsE |
| P0A7W1 | ular_ecoli | rs5_ecoli   | ulaR | rpsE |
| P02359 | ular_ecoli | rs7_ecoli   | ulaR | rpsG |
| P0A7W7 | ular_ecoli | rs8_ecoli   | ulaR | rpsH |
| P0A7X3 | ular_ecoli | rs9_ecoli   | ulaR | rpsI |
| P77802 | ular_ecoli | yagx_ecoli  | ulaR | yagX |
| P66948 | ular_ecoli | yfgc_ecoli  | ulaR | yfgC |
| P76578 | ular_ecoli | yfhm_ecoli  | ulaR | yfhM |
| P67660 | ular_ecoli | yhaj_ecoli  | ulaR | yhaJ |
| P76092 | ular_ecoli | ynbc_ecoli  | ulaR | ynbC |
|        |            |             |      |      |
| P0ACJ0 | upp_ecoli  | lrp_ecoli   | upp  | lrp  |
| P15288 | upp_ecoli  | pepd_ecoli  | upp  | pepD |
| P08179 | upp_ecoli  | pur3_ecoli  | upp  | purN |
| P0AG44 | upp_ecoli  | rl17_ecoli  | upp  | rplQ |
|        |            |             |      |      |
| P38054 | usg_ecoli  | cusa_ecoli  | usg  | cusA |
| P0CE47 | usg_ecoli  | eftu1_ecoli | usg  | tufA |
| P0CE47 | usg_ecoli  | eftu1_ecoli | usg  | tufA |
| P21599 | usg_ecoli  | kpyk2_ecoli | usg  | pykA |
| P0AFG0 | usg_ecoli  | nusg_ecoli  | usg  | nusG |

|        |            |            |      |      |
|--------|------------|------------|------|------|
| P0AFG0 | usg_ecoli  | nusg_ecoli | usg  | nusG |
| P0A799 | usg_ecoli  | pgk_ecoli  | usg  | pgk  |
| P0A7K2 | usg_ecoli  | rl7_ecoli  | usg  | rpIL |
| P0A7Z4 | usg_ecoli  | rpoa_ecoli | usg  | rpoA |
| P0A8V2 | usg_ecoli  | rpob_ecoli | usg  | rpoB |
| P0A8T7 | usg_ecoli  | rpoc_ecoli | usg  | rpoC |
| P0A8T7 | usg_ecoli  | rpoc_ecoli | usg  | rpoC |
| P0A8T7 | usg_ecoli  | rpoc_ecoli | usg  | rpoC |
| P0A7V3 | usg_ecoli  | rs3_ecoli  | usg  | rpsC |
| P0ACT6 | usg_ecoli  | uidr_ecoli | usg  | uidR |
| P77395 | usg_ecoli  | ybbn_ecoli | usg  | ybbN |
| P0ADE8 | usg_ecoli  | ygfz_ecoli | usg  | ygfZ |
| P0ADK6 | usg_ecoli  | yiba_ecoli | usg  | yibA |
| P32701 | usg_ecoli  | yjcc_ecoli | usg  | yjcC |
|        |            |            |      |      |
| P0ACG1 | uspa_ecoli | stpa_ecoli | uspA | stpA |
| P30176 | uspa_ecoli | ybia_ecoli | uspA | ybiA |
| P0ADK8 | uspa_ecoli | yibl_ecoli | uspA | yibL |
|        |            |            |      |      |
| P0ABE7 | uspf_ecoli | c562_ecolx | uspF | cybC |
| P0A6Y8 | uspf_ecoli | dnak_ecoli | uspF | dnaK |
| P0ABC7 | uspf_ecoli | hflk_ecoli | uspF | hflK |
| P39347 | uspf_ecoli | intb_ecoli | uspF | intB |
| P77188 | uspf_ecoli | matc_ecoli | uspF | matC |
| P18843 | uspf_ecoli | nade_ecoli | uspF | nadE |
| P76078 | uspf_ecoli | paab_ecoli | uspF | paaB |
| P02413 | uspf_ecoli | rl15_ecoli | uspF | rpIO |
| P0A7K6 | uspf_ecoli | rl19_ecoli | uspF | rpIS |
| P60723 | uspf_ecoli | rl4_ecoli  | uspF | rpID |
| P62399 | uspf_ecoli | rl5_ecoli  | uspF | rpIE |
| P0AA39 | uspf_ecoli | rluc_ecoli | uspF | rluC |
| P0A7S9 | uspf_ecoli | rs13_ecoli | uspF | rpsM |
| P0A7X3 | uspf_ecoli | rs9_ecoli  | uspF | rpsI |
| P0AG86 | uspf_ecoli | secb_ecoli | uspF | secB |
| P80644 | uspf_ecoli | ssue_ecoli | uspF | ssuE |
| P0ACJ5 | uspf_ecoli | ybao_ecoli | uspF | ybaO |
| P0AB43 | uspf_ecoli | ycgl_ecoli | uspF | ycgL |
| P52128 | uspf_ecoli | yfjm_ecoli | uspF | yfjM |
|        |            |            |      |      |
| P35340 | uspg_ecoli | ahpf_ecoli | uspG | ahpF |
| P0ABB0 | uspg_ecoli | atpa_ecoli | uspG | atpA |

|        |            |             |      |      |
|--------|------------|-------------|------|------|
| P00722 | uspg_ecoli | bgal_ecoli  | uspG | lacZ |
| P0A6F1 | uspg_ecoli | cara_ecoli  | uspG | carA |
| P0A6F5 | uspg_ecoli | ch60_ecoli  | uspG | groL |
| P0A6F5 | uspg_ecoli | ch60_ecoli  | uspG | groL |
| P0A6F5 | uspg_ecoli | ch60_ecoli  | uspG | groL |
| P0A6J5 | uspg_ecoli | dada_ecoli  | uspG | dadA |
| P0AC41 | uspg_ecoli | dhsa_ecoli  | uspG | sdhA |
| P08622 | uspg_ecoli | dnaj_ecoli  | uspG | dnaJ |
| P08622 | uspg_ecoli | dnaj_ecoli  | uspG | dnaJ |
| P0A6Y8 | uspg_ecoli | dnak_ecoli  | uspG | dnaK |
| P0A6Y8 | uspg_ecoli | dnak_ecoli  | uspG | dnaK |
| P10443 | uspg_ecoli | dpo3a_ecoli | uspG | dnaE |
| P0CE47 | uspg_ecoli | eftu1_ecoli | uspG | tufA |
| P13035 | uspg_ecoli | glpd_ecoli  | uspG | glpD |
| P67910 | uspg_ecoli | hldd_ecoli  | uspG | hldD |
| P22523 | uspg_ecoli | mukb_ecoli  | uspG | mukB |
| P23538 | uspg_ecoli | ppsa_ecoli  | uspG | ppsA |
| P09546 | uspg_ecoli | puta_ecoli  | uspG | putA |
| P0ADZ0 | uspg_ecoli | rl23_ecoli  | uspG | rplW |
| P0A7K2 | uspg_ecoli | rl7_ecoli   | uspG | rplL |
| P0A8V2 | uspg_ecoli | rpob_ecoli  | uspG | rpoB |
| P0A8T7 | uspg_ecoli | rpoc_ecoli  | uspG | rpoC |
| P10408 | uspg_ecoli | seca_ecoli  | uspG | secA |
| P0AG86 | uspg_ecoli | secb_ecoli  | uspG | secB |
| P00944 | uspg_ecoli | xyla_ecoli  | uspG | xylA |
| P75838 | uspg_ecoli | ycao_ecoli  | uspG | ycaO |
|        |            |             |      |      |
| P25553 | uup_ecoli  | alda_ecoli  | uup  | aldA |
| P18843 | uup_ecoli  | nade_ecoli  | uup  | nadE |
| P0A8N3 | uup_ecoli  | syk1_ecoli  | uup  | lysS |
| Q47536 | uup_ecoli  | yaip_ecoli  | uup  | yaiP |
| P76069 | uup_ecoli  | yday_ecoli  | uup  | ydaY |
| P37774 | uup_ecoli  | yecc_ecoli  | uup  | yecC |
| P76440 | uup_ecoli  | yeit_ecoli  | uup  | yeiT |
|        |            |             |      |      |
| P0A6Y8 | uvra_ecoli | dnak_ecoli  | uvrA | dnaK |
| P09152 | uvra_ecoli | narg_ecoli  | uvrA | narG |
| P19319 | uvra_ecoli | narz_ecoli  | uvrA | narZ |
|        |            |             |      |      |
| P0A9Y6 | uvrc_ecoli | cspc_ecoli  | uvrC | cspC |
| P0ACF0 | uvrc_ecoli | dbha_ecoli  | uvrC | hupA |
| P76128 | uvrc_ecoli | ddpa_ecoli  | uvrC | ddpA |
| P0A9P0 | uvrc_ecoli | dldh_ecoli  | uvrC | lpdA |
| P0A9P0 | uvrc_ecoli | dldh_ecoli  | uvrC | lpdA |
| P0AC55 | uvrc_ecoli | glnk_ecoli  | uvrC | glnK |

|        |            |            |      |      |
|--------|------------|------------|------|------|
| P0AFG3 | uvrc_ecoli | odo1_ecoli | uvrC | sucA |
| P0AFG6 | uvrc_ecoli | odo2_ecoli | uvrC | sucB |
| P0AFG8 | uvrc_ecoli | odp1_ecoli | uvrC | aceE |
| P07001 | uvrc_ecoli | pnta_ecoli | uvrC | pntA |
| P0A7L0 | uvrc_ecoli | rl1_ecoli  | uvrC | rplA |
| P0A7L0 | uvrc_ecoli | rl1_ecoli  | uvrC | rplA |
| P0AA10 | uvrc_ecoli | rl13_ecoli | uvrC | rplM |
| P0ADY3 | uvrc_ecoli | rl14_ecoli | uvrC | rplN |
| P0A7K6 | uvrc_ecoli | rl19_ecoli | uvrC | rplS |
| P60422 | uvrc_ecoli | rl2_ecoli  | uvrC | rplB |
| P60422 | uvrc_ecoli | rl2_ecoli  | uvrC | rplB |
| P0A7L3 | uvrc_ecoli | rl20_ecoli | uvrC | rplT |
| P0AG48 | uvrc_ecoli | rl21_ecoli | uvrC | rplU |
| P61175 | uvrc_ecoli | rl22_ecoli | uvrC | rplV |
| P68919 | uvrc_ecoli | rl25_ecoli | uvrC | rplY |
| P0A7M2 | uvrc_ecoli | rl28_ecoli | uvrC | rpmB |
| P60438 | uvrc_ecoli | rl3_ecoli  | uvrC | rplC |
| P60438 | uvrc_ecoli | rl3_ecoli  | uvrC | rplC |
| P60723 | uvrc_ecoli | rl4_ecoli  | uvrC | rplD |
| P0A7R1 | uvrc_ecoli | rl9_ecoli  | uvrC | rplI |
| P0AG67 | uvrc_ecoli | rs1_ecoli  | uvrC | rpsA |
| P0A7R5 | uvrc_ecoli | rs10_ecoli | uvrC | rpsJ |
| P0A7R9 | uvrc_ecoli | rs11_ecoli | uvrC | rpsK |
| P0A7S3 | uvrc_ecoli | rs12_ecoli | uvrC | rpsL |
| P0A7S9 | uvrc_ecoli | rs13_ecoli | uvrC | rpsM |
| P0A7S9 | uvrc_ecoli | rs13_ecoli | uvrC | rpsM |
| P0AG59 | uvrc_ecoli | rs14_ecoli | uvrC | rpsN |
| P0ADZ4 | uvrc_ecoli | rs15_ecoli | uvrC | rpsO |
| P0A7T7 | uvrc_ecoli | rs18_ecoli | uvrC | rpsR |
| P0A7U3 | uvrc_ecoli | rs19_ecoli | uvrC | rpsS |
| P0A7V0 | uvrc_ecoli | rs2_ecoli  | uvrC | rpsB |
| P0A7U7 | uvrc_ecoli | rs20_ecoli | uvrC | rpsT |
| P0A7V3 | uvrc_ecoli | rs3_ecoli  | uvrC | rpsC |
| P0A7V3 | uvrc_ecoli | rs3_ecoli  | uvrC | rpsC |
| P0A7V8 | uvrc_ecoli | rs4_ecoli  | uvrC | rpsD |
| P0A7V8 | uvrc_ecoli | rs4_ecoli  | uvrC | rpsD |
| P0A7W1 | uvrc_ecoli | rs5_ecoli  | uvrC | rpsE |
| P02358 | uvrc_ecoli | rs6_ecoli  | uvrC | rpsF |
| P02359 | uvrc_ecoli | rs7_ecoli  | uvrC | rpsG |
| P02359 | uvrc_ecoli | rs7_ecoli  | uvrC | rpsG |
| P0A7W7 | uvrc_ecoli | rs8_ecoli  | uvrC | rpsH |
| P77172 | uvrc_ecoli | yfgf_ecoli | uvrC | yfgF |
| P07021 | uvrc_ecoli | yfib_ecoli | uvrC | yfiB |
| P0AGJ5 | uvrc_ecoli | yfif_ecoli | uvrC | yfiF |
| P0AGK4 | uvrc_ecoli | yhby_ecoli | uvrC | yhbY |

|        |                            |                            |      |      |
|--------|----------------------------|----------------------------|------|------|
| P31806 | <a href="#">uvrc_ecoli</a> | <a href="#">yjef_ecoli</a> | uvrC | yjeF |
| P18843 | <a href="#">uxub_ecoli</a> | <a href="#">nade_ecoli</a> | uxuB | nadE |
| P08400 | <a href="#">uxub_ecoli</a> | <a href="#">phor_ecoli</a> | uxuB | phoR |
|        |                            |                            |      |      |
| P33593 | <a href="#">wrba_ecoli</a> | <a href="#">nikd_ecoli</a> | wrbA | nikD |
| P23836 | <a href="#">wrba_ecoli</a> | <a href="#">phop_ecoli</a> | wrbA | phoP |
| P0A6A8 | <a href="#">xerd_ecoli</a> | <a href="#">acp_ecoli</a>  | xerD | acpP |
| P0A717 | <a href="#">xerd_ecoli</a> | <a href="#">kprs_ecoli</a> | xerD | prs  |
| P22523 | <a href="#">xerd_ecoli</a> | <a href="#">mukb_ecoli</a> | xerD | mukB |
| P0AG44 | <a href="#">xerd_ecoli</a> | <a href="#">rl17_ecoli</a> | xerD | rplQ |
| P0A7X3 | <a href="#">xerd_ecoli</a> | <a href="#">rs9_ecoli</a>  | xerD | rpsI |
| P39321 | <a href="#">xerd_ecoli</a> | <a href="#">ytfn_ecoli</a> | xerD | ytfN |
| P0A901 | <a href="#">xgpt_ecoli</a> | <a href="#">blc_ecoli</a>  | gpt  | blc  |
| P0A6F5 | <a href="#">yadg_ecoli</a> | <a href="#">ch60_ecoli</a> | yadG | groL |
| P13035 | <a href="#">yadg_ecoli</a> | <a href="#">glpd_ecoli</a> | yadG | glpD |
|        |                            |                            |      |      |
| P11557 | <a href="#">yaet_ecoli</a> | <a href="#">damx_ecoli</a> | yaet | damX |
| P0A7B1 | <a href="#">yafc_ecoli</a> | <a href="#">ppk_ecoli</a>  | yafC | ppk  |
| P00722 | <a href="#">yagi_ecoli</a> | <a href="#">bgal_ecoli</a> | yagI | lacZ |
| P06611 | <a href="#">yagi_ecoli</a> | <a href="#">btud_ecoli</a> | yagI | btuD |
| P24183 | <a href="#">yagi_ecoli</a> | <a href="#">fdng_ecoli</a> | yagI | fdnG |
| P50457 | <a href="#">yagi_ecoli</a> | <a href="#">puue_ecoli</a> | yagI | puuE |
| P0A9W3 | <a href="#">yagi_ecoli</a> | <a href="#">yjjk_ecoli</a> | yagI | yjjK |
| P0A6Y8 | <a href="#">yagl_ecoli</a> | <a href="#">dnak_ecoli</a> | yagL | dnaK |
| P0A7U7 | <a href="#">yagl_ecoli</a> | <a href="#">rs20_ecoli</a> | yagL | rpsT |
| P0A9K9 | <a href="#">yagl_ecoli</a> | <a href="#">slyd_ecoli</a> | yagL | slyD |

|        |            |             |      |      |
|--------|------------|-------------|------|------|
| P0A9D8 | yaha_ecoli | dapd_ecoli  | yahA | dapD |
| P0A7L0 | yaha_ecoli | rl1_ecoli   | yahA | rplA |
| P0A7X3 | yaha_ecoli | rs9_ecoli   | yahA | rpsI |
| P22523 | yahk_ecoli | mukb_ecoli  | yahK | mukB |
| P18843 | yahk_ecoli | nade_ecoli  | yahK | nadE |
| P0ABL5 | yahk_ecoli | napc_ecoli  | yahK | napC |
| P0AG44 | yahk_ecoli | rl17_ecoli  | yahK | rplQ |
| P0AAQ6 | yahk_ecoli | ybaa_ecoli  | yahK | ybaA |
| P18843 | yail_ecoli | nade_ecoli  | yaiL | nadE |
| P0A843 | yail_ecoli | tate_ecoli  | yaiL | tatE |
| P37750 | yail_ecoli | wbbj_ecoli  | yaiL | wbbJ |
| P0ADZ7 | yajc_ecoli | yajc_ecoli  | yajC | yajC |
| P0A988 | yajq_ecoli | dpo3b_ecoli | yajQ | dnaN |
| P0A9P6 | ybab_ecoli | dead_ecoli  | ybaB | deaD |
| P27294 | ybab_ecoli | inaa_ecoli  | ybaB | inaA |
| P39347 | ybab_ecoli | intb_ecoli  | ybaB | intB |
| P18843 | ybab_ecoli | nade_ecoli  | ybaB | nadE |
| P0A7L3 | ybab_ecoli | rl20_ecoli  | ybaB | rplT |
| P77377 | ybab_ecoli | wzxc_ecoli  | ybaB | wzxC |
| P0AB52 | ybab_ecoli | ychn_ecoli  | ybaB | ychN |
| P76261 | ybcd_ecoli | adrb_ecoli  | ybcD | adrB |
| P0ABB0 | ybch_ecoli | atpa_ecoli  | ybcH | atpA |
| P0A6F5 | ybch_ecoli | ch60_ecoli  | ybcH | groL |
| P00895 | ybch_ecoli | trpe_ecoli  | ybcH | trpE |
| P64572 | ybch_ecoli | yghr_ecoli  | ybcH | yghR |
| P0A6F5 | ybcm_ecoli | ch60_ecoli  | ybcM | groL |
| P17846 | ybcm_ecoli | cysi_ecoli  | ybcM | cysI |
| P0A9A9 | ybcm_ecoli | fur_ecoli   | ybcM | fur  |
| P0A772 | ybcm_ecoli | nrdi_ecoli  | ybcM | nrdI |
| P0A7J3 | ybcm_ecoli | rl10_ecoli  | ybcM | rplJ |
| P0AG44 | ybcm_ecoli | rl17_ecoli  | ybcM | rplQ |
| P0A7M2 | ybcm_ecoli | rl28_ecoli  | ybcM | rpmB |
| P0A7T7 | ybcm_ecoli | rs18_ecoli  | ybcM | rpsR |
| Q47622 | ybcm_ecoli | sapa_ecoli  | ybcM | sapA |

|        |            |             |      |      |
|--------|------------|-------------|------|------|
| P0AAH8 | ybcm_ecoli | sapf_ecoli  | ybcM | sapF |
| P0AB61 | ybcm_ecoli | ycin_ecoli  | ybcM | ycin |
| P0A6H1 | ybed_ecoli | clpx_ecoli  | ybeD | clpX |
| P0CE47 | ybed_ecoli | eftu1_ecoli | ybeD | tufA |
| P0A9A9 | ybed_ecoli | fur_ecoli   | ybeD | fur  |
| P18843 | ybed_ecoli | nade_ecoli  | ybeD | nadE |
| P0A8V2 | ybed_ecoli | rpob_ecoli  | ybeD | rpoB |
| P0A8T7 | ybed_ecoli | rpoc_ecoli  | ybeD | rpoC |
| P45751 | ybed_ecoli | yrfb_ecoli  | ybeD | yrfB |
| P0A6A8 | ybgc_ecoli | acp_ecoli   | ybgC | acpP |
| O32591 | ybgc_ecoli | espp_ecolx  | ybgC | espP |
| O32591 | ybgc_ecoli | espp_ecolx  | ybgC | espP |
| O32591 | ybgc_ecoli | espp_ecolx  | ybgC | espP |
| P0A7A7 | ybgc_ecoli | plsb_ecoli  | ybgC | plsB |
| P0A7A7 | ybgc_ecoli | plsb_ecoli  | ybgC | plsB |
| P27247 | ybgc_ecoli | plsx_ecoli  | ybgC | plsX |
| P60422 | ybgc_ecoli | rl2_ecoli   | ybgC | rplB |
| P0ADZ0 | ybgc_ecoli | rl23_ecoli  | ybgC | rplW |
| P60438 | ybgc_ecoli | rl3_ecoli   | ybgC | rplC |
| P0A7V8 | ybgc_ecoli | rs4_ecoli   | ybgC | rpsD |
| P10408 | ybgc_ecoli | seca_ecoli  | ybgC | secA |
| P10408 | ybgc_ecoli | seca_ecoli  | ybgC | secA |
| P0AG24 | ybgc_ecoli | spot_ecoli  | ybgC | spoT |
| P76092 | ybgc_ecoli | ynbc_ecoli  | ybgC | ynbC |
| P0A9Q1 | ybgi_ecoli | arca_ecoli  | ybgl | arcA |
| P0ACG1 | ybgi_ecoli | stpa_ecoli  | ybgl | stpA |
| Q46942 | ybgi_ecoli | yqei_ecoli  | ybgl | yqel |
| Q46856 | ybgi_ecoli | yqhd_ecoli  | ybgl | yqhD |
| P0ADS2 | ybgi_ecoli | zapa_ecoli  | ybgl | zapA |
| P0A6F5 | ybgj_ecoli | ch60_ecoli  | ybgJ | groL |
| P0AC53 | ybgj_ecoli | g6pd_ecoli  | ybgJ | zwf  |
| P42911 | ybgj_ecoli | ptpd_ecoli  | ybgJ | agaD |
| P0A6F5 | ybgk_ecoli | ch60_ecoli  | ybgK | groL |
| P50465 | ybgk_ecoli | end8_ecoli  | ybgK | nei  |
| P04079 | ybgk_ecoli | guaa_ecoli  | ybgK | guaA |
| P28912 | ybgk_ecoli | yhhi_ecoli  | ybgK | yhhi |

|        |            |             |      |      |
|--------|------------|-------------|------|------|
| POA6Y8 | ybis_ecoli | dnak_ecoli  | ybiS | dnaK |
| POA6Z3 | ybis_ecoli | htpg_ecoli  | ybiS | htpG |
| POA9M0 | ybjd_ecoli | lon_ecoli   | ybjD | lon  |
| P60422 | ybjd_ecoli | rl2_ecoli   | ybjD | rplB |
| POACM5 | ybjd_ecoli | yegw_ecoli  | ybjD | yegW |
| P67910 | ybjq_ecoli | hldd_ecoli  | ybjQ | hldD |
| P05052 | ybjx_ecoli | appy_ecoli  | ybjX | appY |
| POA6F5 | ybjx_ecoli | ch60_ecoli  | ybjX | groL |
| POACF0 | ybjx_ecoli | dbha_ecoli  | ybjX | hupA |
| POACF4 | ybjx_ecoli | dbhb_ecoli  | ybjX | hupB |
| POA9P0 | ybjx_ecoli | dldh_ecoli  | ybjX | lpdA |
| P08622 | ybjx_ecoli | dnaj_ecoli  | ybjX | dnaJ |
| POCE47 | ybjx_ecoli | eftu1_ecoli | ybjX | tufA |
| POCE47 | ybjx_ecoli | eftu1_ecoli | ybjX | tufA |
| P67910 | ybjx_ecoli | hldd_ecoli  | ybjX | hldD |
| P06722 | ybjx_ecoli | muth_ecoli  | ybjX | mutH |
| P06959 | ybjx_ecoli | odp2_ecoli  | ybjX | aceF |
| POAFI9 | ybjx_ecoli | perm_ecoli  | ybjX | perM |
| P23830 | ybjx_ecoli | pss_ecoli   | ybjX | pssA |
| POA7L0 | ybjx_ecoli | rl1_ecoli   | ybjX | rplA |
| POA7L0 | ybjx_ecoli | rl1_ecoli   | ybjX | rplA |
| POA7J3 | ybjx_ecoli | rl10_ecoli  | ybjX | rplJ |
| POAA10 | ybjx_ecoli | rl13_ecoli  | ybjX | rplM |
| POAA10 | ybjx_ecoli | rl13_ecoli  | ybjX | rplM |
| P02413 | ybjx_ecoli | rl15_ecoli  | ybjX | rplO |
| POAG44 | ybjx_ecoli | rl17_ecoli  | ybjX | rplQ |
| POA7K6 | ybjx_ecoli | rl19_ecoli  | ybjX | rplS |
| P60422 | ybjx_ecoli | rl2_ecoli   | ybjX | rplB |
| P60422 | ybjx_ecoli | rl2_ecoli   | ybjX | rplB |
| P60422 | ybjx_ecoli | rl2_ecoli   | ybjX | rplB |
| POA7L3 | ybjx_ecoli | rl20_ecoli  | ybjX | rplT |
| POAG48 | ybjx_ecoli | rl21_ecoli  | ybjX | rplU |
| P61175 | ybjx_ecoli | rl22_ecoli  | ybjX | rplV |
| P60624 | ybjx_ecoli | rl24_ecoli  | ybjX | rplX |
| POA7M2 | ybjx_ecoli | rl28_ecoli  | ybjX | rpmB |



|        |            |            |      |       |
|--------|------------|------------|------|-------|
| P0A7M6 | ybjx_ecoli | rl29_ecoli | ybjX | rpmC  |
| P60438 | ybjx_ecoli | rl3_ecoli  | ybjX | rpIC  |
| P60438 | ybjx_ecoli | rl3_ecoli  | ybjX | rpIC  |
| P0A7N9 | ybjx_ecoli | rl33_ecoli | ybjX | rpmG  |
| P60723 | ybjx_ecoli | rl4_ecoli  | ybjX | rpID  |
| P60723 | ybjx_ecoli | rl4_ecoli  | ybjX | rpID  |
| P62399 | ybjx_ecoli | rl5_ecoli  | ybjX | rpIE  |
| P62399 | ybjx_ecoli | rl5_ecoli  | ybjX | rpIE  |
| P0AG55 | ybjx_ecoli | rl6_ecoli  | ybjX | rpIF  |
| P0AG55 | ybjx_ecoli | rl6_ecoli  | ybjX | rpIF  |
| P0A7K2 | ybjx_ecoli | rl7_ecoli  | ybjX | rpIL  |
| P0A7R1 | ybjx_ecoli | rl9_ecoli  | ybjX | rpII  |
| P37765 | ybjx_ecoli | rlub_ecoli | ybjX | rluB  |
| P21499 | ybjx_ecoli | rnrc_ecoli | ybjX | rnrc  |
| P0A8T7 | ybjx_ecoli | rpoc_ecoli | ybjX | rpocC |
| P0AG67 | ybjx_ecoli | rs1_ecoli  | ybjX | rpsA  |
| P0AG67 | ybjx_ecoli | rs1_ecoli  | ybjX | rpsA  |
| P0A7S9 | ybjx_ecoli | rs13_ecoli | ybjX | rpsM  |
| P0A7U3 | ybjx_ecoli | rs19_ecoli | ybjX | rpsS  |
| P0A7V0 | ybjx_ecoli | rs2_ecoli  | ybjX | rpsB  |
| P0A7V0 | ybjx_ecoli | rs2_ecoli  | ybjX | rpsB  |
| P0A7U7 | ybjx_ecoli | rs20_ecoli | ybjX | rpsT  |
| P0A7V3 | ybjx_ecoli | rs3_ecoli  | ybjX | rpsC  |
| P0A7V3 | ybjx_ecoli | rs3_ecoli  | ybjX | rpsC  |
| P0A7V8 | ybjx_ecoli | rs4_ecoli  | ybjX | rpsD  |
| P0A7W1 | ybjx_ecoli | rs5_ecoli  | ybjX | rpsE  |
| P02358 | ybjx_ecoli | rs6_ecoli  | ybjX | rpsF  |
| P02359 | ybjx_ecoli | rs7_ecoli  | ybjX | rpsG  |
| P02359 | ybjx_ecoli | rs7_ecoli  | ybjX | rpsG  |
| P21507 | ybjx_ecoli | srmb_ecoli | ybjX | srmb  |
| P08245 | ybjx_ecoli | ycih_ecoli | ybjX | yciH  |
|        |            |            |      |       |
| P09546 | ycac_ecoli | puta_ecoli | ycaC | putA  |
| P0A843 | ycac_ecoli | tate_ecoli | ycaC | tatE  |
|        |            |            |      |       |
| P32721 | ycao_ecoli | alsa_ecoli | ycaO | alsA  |
| P0A7M6 | ycao_ecoli | rl29_ecoli | ycaO | rpmC  |
|        |            |            |      |       |
| P0AFG6 | ycbb_ecoli | odo2_ecoli | ycbB | sucB  |
|        |            |            |      |       |
| P0A9N4 | ycbg_ecoli | pfla_ecoli | ycbG | pflA  |
| P0A7L0 | ycbg_ecoli | rl1_ecoli  | ycbG | rpIA  |
| P60422 | ycbg_ecoli | rl2_ecoli  | ycbG | rpIB  |
| P0A7W1 | ycbg_ecoli | rs5_ecoli  | ycbG | rpsE  |
| P39306 | ycbg_ecoli | ulaf_ecoli | ycbG | ulaF  |

|        |            |            |      |      |
|--------|------------|------------|------|------|
| P75989 | ycbg_ecoli | ycge_ecoli | ycbG | ycgE |
| P06974 | ydbl_ecoli | flim_ecoli | ycbL | fliM |
| P0AFG3 | ydbl_ecoli | odo1_ecoli | ycbL | sucA |
| P77554 | ydbl_ecoli | yahj_ecoli | ycbL | yahJ |
| P0A7K2 | yccu_ecoli | rl7_ecoli  | yccU | rplL |
| P31680 | yced_ecoli | djla_ecoli | yceD | djIA |
| P0ACF8 | yced_ecoli | hns_ecoli  | yceD | hns  |
| P22523 | yced_ecoli | mukb_ecoli | yceD | mukB |
| P15288 | yced_ecoli | pepd_ecoli | yceD | pepD |
| P0AG44 | yced_ecoli | rl17_ecoli | yceD | rplQ |
| P62399 | yced_ecoli | rl5_ecoli  | yceD | rplE |
| P0AG55 | yced_ecoli | rl6_ecoli  | yceD | rplF |
| P0A7R5 | yced_ecoli | rs10_ecoli | yceD | rpsJ |
| P0A7V3 | yced_ecoli | rs3_ecoli  | yceD | rpsC |
| P0A7X3 | yced_ecoli | rs9_ecoli  | yceD | rpsI |
| P0A717 | ycfd_ecoli | kprs_ecoli | ycfD | prs  |
| P0AFD1 | ycfd_ecoli | nuoe_ecoli | ycfD | nuoE |
| P31663 | ycfd_ecoli | panc_ecoli | ycfD | panC |
| P09373 | ycfd_ecoli | pflb_ecoli | ycfD | pflB |
| P0ADY7 | ycfd_ecoli | rl16_ecoli | ycfD | rplP |
| P0AG44 | ycfd_ecoli | rl17_ecoli | ycfD | rplQ |
| P60422 | ycfd_ecoli | rl2_ecoli  | ycfD | rplB |
| P0A8I8 | ycfd_ecoli | rlmh_ecoli | ycfD | rlmH |
| P0A7V3 | ycfd_ecoli | rs3_ecoli  | ycfD | rpsC |
| P0A7X3 | ycfd_ecoli | rs9_ecoli  | ycfD | rpsI |
| P76154 | ycfd_ecoli | ydfk_ecoli | ycfD | ydfK |
| P76073 | ycfd_ecoli | ynae_ecoli | ycfD | ynaE |
| P0A6F5 | ycgb_ecoli | ch60_ecoli | ycgB | groL |
| P30128 | ycgb_ecoli | greb_ecoli | ycgB | greB |
| P60422 | ycgb_ecoli | rl2_ecoli  | ycgB | rplB |
| P0AED5 | ycgb_ecoli | uvry_ecoli | ycgB | uvrY |

|        |            |             |      |       |
|--------|------------|-------------|------|-------|
| P0A6F5 | ychj_ecoli | ch60_ecoli  | ychJ | groL  |
| P24251 | ychj_ecoli | crl_ecoli   | ychJ | crl   |
| P24183 | ychj_ecoli | fdng_ecoli  | ychJ | fdnG  |
| P0ACF8 | ychj_ecoli | hns_ecoli   | ychJ | hns   |
| P23482 | ychj_ecoli | hyfb_ecoli  | ychJ | hyfB  |
| P71229 | ychj_ecoli | hyfr_ecoli  | ychJ | hyfR  |
| P75679 | ychj_ecoli | insn1_ecoli | ychJ | insN1 |
| P62620 | ychj_ecoli | ispG_ecoli  | ychJ | ispG  |
| P0AEZ3 | ychj_ecoli | mind_ecoli  | ychJ | minD  |
| P54746 | ychj_ecoli | mngb_ecoli  | ychJ | mngB  |
| P19319 | ychj_ecoli | narz_ecoli  | ychJ | narZ  |
| P0A772 | ychj_ecoli | nrDI_ecoli  | ychJ | nrDI  |
| P0A7E1 | ychj_ecoli | pyrD_ecoli  | ychJ | pyrD  |
| P0A7L0 | ychj_ecoli | rl1_ecoli   | ychJ | rplA  |
| P60422 | ychj_ecoli | rl2_ecoli   | ychJ | rplB  |
| P60723 | ychj_ecoli | rl4_ecoli   | ychJ | rplD  |
| P62399 | ychj_ecoli | rl5_ecoli   | ychJ | rplE  |
| P0A7V0 | ychj_ecoli | rs2_ecoli   | ychJ | rpsB  |
| P0A7V3 | ychj_ecoli | rs3_ecoli   | ychJ | rpsC  |
| P0A7V8 | ychj_ecoli | rs4_ecoli   | ychJ | rpsD  |
| P0A7X3 | ychj_ecoli | rs9_ecoli   | ychJ | rpsI  |
| P38104 | ychj_ecoli | rspa_ecoli  | ychJ | rspA  |
| P0A9K9 | ychj_ecoli | slyD_ecoli  | ychJ | slyD  |
| P77718 | ychj_ecoli | thiI_ecoli  | ychJ | thiI  |
| P0A9T6 | ychj_ecoli | ybaQ_ecoli  | ychJ | ybaQ  |
| P52052 | ychj_ecoli | yggR_ecoli  | ychJ | yggR  |
|        |            |             |      |       |
| P60785 | yciu_ecoli | lepA_ecoli  | yciU | lepA  |
| P0AFG8 | yciu_ecoli | odp1_ecoli  | yciU | aceE  |
| P0AFG8 | yciu_ecoli | odp1_ecoli  | yciU | aceE  |
| P06959 | yciu_ecoli | odp2_ecoli  | yciU | aceF  |
| P0AG44 | yciu_ecoli | rl17_ecoli  | yciU | rplQ  |
| P0A7R5 | yciu_ecoli | rs10_ecoli  | yciU | rpsJ  |
|        |            |             |      |       |
| P0AC41 | ycjw_ecoli | dhsA_ecoli  | ycjW | sdhA  |
| P18843 | ycjw_ecoli | nadE_ecoli  | ycjW | nadE  |
| P52125 | ycjw_ecoli | yfjJ_ecoli  | ycjW | yfjJ  |
|        |            |             |      |       |
| P0A717 | ycjz_ecoli | kprs_ecoli  | ycjZ | prs   |

|        |            |             |      |      |
|--------|------------|-------------|------|------|
| P60422 | ycjz_ecoli | rl2_ecoli   | ycjZ | rplB |
| P36999 | ycjz_ecoli | rlma_ecoli  | ycjZ | rlmA |
| P0A7V0 | ycjz_ecoli | rs2_ecoli   | ycjZ | rpsB |
| P76419 | ycjz_ecoli | yegv_ecoli  | ycjZ | yegV |
| P33997 | ydae_ecoli | alpa_ecoli  | ydaE | alpA |
| P18843 | ydae_ecoli | nade_ecoli  | ydaE | nadE |
| P60422 | ydae_ecoli | rl2_ecoli   | ydaE | rplB |
| P0AA43 | ydae_ecoli | rsua_ecoli  | ydaE | rsuA |
| P0A6Y8 | yday_ecoli | dnak_ecoli  | ydaY | dnaK |
| P18843 | yday_ecoli | nade_ecoli  | ydaY | nadE |
| P0AG55 | yday_ecoli | rl6_ecoli   | ydaY | rplF |
| P0A6F5 | ydcr_ecoli | ch60_ecoli  | ydcR | groL |
| P09831 | ydde_ecoli | gltb_ecoli  | yddE | gltB |
| P30958 | ydde_ecoli | mfd_ecoli   | yddE | mfd  |
| P18843 | ydde_ecoli | nade_ecoli  | yddE | nadE |
| P0A8V2 | ydde_ecoli | rpob_ecoli  | yddE | rpoB |
| P76578 | ydde_ecoli | yfhm_ecoli  | yddE | yfhM |
| P31224 | ydfg_ecoli | acrb_ecoli  | ydfG | acrB |
| P35340 | ydfg_ecoli | ahpf_ecoli  | ydfG | ahpF |
| P00722 | ydfg_ecoli | bgal_ecoli  | ydfG | lacZ |
| P0A6F5 | ydfg_ecoli | ch60_ecoli  | ydfG | groL |
| P18843 | ydfg_ecoli | nade_ecoli  | ydfG | nadE |
| P20966 | ydfg_ecoli | ptfbc_ecoli | ydfG | fruA |
| P16916 | ydfg_ecoli | rhsa_ecoli  | ydfG | rhsA |
| P00722 | ydfz_ecoli | bgal_ecoli  | ydfZ | lacZ |
| P54746 | ydfz_ecoli | mngb_ecoli  | ydfZ | mngB |
| P18843 | ydfz_ecoli | nade_ecoli  | ydfZ | nadE |

|        |            |            |      |      |
|--------|------------|------------|------|------|
| P0ABL5 | ydfz_ecoli | napc_ecoli | ydfZ | napC |
| P15288 | ydfz_ecoli | pepd_ecoli | ydfZ | pepD |
| P09373 | ydfz_ecoli | pflb_ecoli | ydfZ | pflB |
| P31828 | ydfz_ecoli | pqqL_ecoli | ydfZ | pqqL |
| P0AAS9 | ydfz_ecoli | ybdd_ecoli | ydfZ | ybdD |
| P77536 | ydfz_ecoli | ykgf_ecoli | ydfZ | ykgF |

|        |            |            |      |      |
|--------|------------|------------|------|------|
| P0A6Y8 | ydhq_ecoli | dnak_ecoli | ydhQ | dnaK |
| P0A6M8 | ydhq_ecoli | efg_ecoli  | ydhQ | fusA |
| P0A9P9 | ydhq_ecoli | idno_ecoli | ydhQ | idnO |
| P0AF06 | ydhq_ecoli | motb_ecoli | ydhQ | motB |
| P18843 | ydhq_ecoli | nade_ecoli | ydhQ | nadE |
| P0A763 | ydhq_ecoli | ndk_ecoli  | ydhQ | ndk  |
| P0AFA5 | ydhq_ecoli | nfrb_ecoli | ydhQ | nfrB |
| P27129 | ydhq_ecoli | rfaj_ecoli | ydhQ | rfaj |
| P0A7L0 | ydhq_ecoli | rl1_ecoli  | ydhQ | rpIA |
| P0A7J7 | ydhq_ecoli | rl11_ecoli | ydhQ | rpIK |
| P0ADY3 | ydhq_ecoli | rl14_ecoli | ydhQ | rpIN |
| P0A7V0 | ydhq_ecoli | rs2_ecoli  | ydhQ | rpsB |
| P43672 | ydhq_ecoli | uup_ecoli  | ydhQ | uup  |
| P08245 | ydhq_ecoli | ycih_ecoli | ydhQ | yciH |

|        |            |             |      |      |
|--------|------------|-------------|------|------|
| P0A6Y8 | ydhr_ecoli | dnak_ecoli  | ydhR | dnaK |
| P0A6Y8 | ydhr_ecoli | dnak_ecoli  | ydhR | dnaK |
| P0A988 | ydhr_ecoli | dpo3b_ecoli | ydhR | dnaN |

|        |            |             |      |      |
|--------|------------|-------------|------|------|
| P0CE47 | ydiH_ecoli | eftu1_ecoli | ydiH | tufA |
| P67910 | ydiH_ecoli | hldd_ecoli  | ydiH | hldD |
| P37692 | ydiH_ecoli | rfaf_ecoli  | ydiH | rfaF |
| P0A7V3 | ydiH_ecoli | rs3_ecoli   | ydiH | rpsC |
| P0A7W1 | ydiH_ecoli | rs5_ecoli   | ydiH | rpsE |
| P02359 | ydiH_ecoli | rs7_ecoli   | ydiH | rpsG |
| P0AG24 | ydiH_ecoli | spot_ecoli  | ydiH | spoT |
| P0A850 | ydiH_ecoli | tig_ecoli   | ydiH | tig  |
| P76092 | ydiH_ecoli | ynbc_ecoli  | ydiH | ynbC |

|        |            |            |      |      |
|--------|------------|------------|------|------|
| P30859 | ydja_ecoli | arti_ecoli | ydjA | arti |
| P76290 | ydja_ecoli | cmoa_ecoli | ydjA | cmoA |
| P0A6Y8 | ydja_ecoli | dnak_ecoli | ydjA | dnaK |

|        |            |             |      |      |
|--------|------------|-------------|------|------|
| P03023 | ydja_ecoli | laci_ecoli  | ydjA | lacI |
| P33345 | ydja_ecoli | molr_ecoli  | ydjA | yehH |
| P33228 | ydja_ecoli | rect_ecoli  | ydjA | recT |
| P0A7V8 | ydja_ecoli | rs4_ecoli   | ydjA | rpsD |
| P0AA43 | ydja_ecoli | rsua_ecoli  | ydjA | rsuA |
| P67660 | ydja_ecoli | yhaj_ecoli  | ydjA | yhaJ |
| P0A9P0 | ydjf_ecoli | dldh_ecoli  | ydjF | lpdA |
| P0A6Y8 | ydjf_ecoli | dnak_ecoli  | ydjF | dnaK |
| P0ACF8 | ydjf_ecoli | hns_ecoli   | ydjF | hns  |
| P0A6H5 | ydjf_ecoli | hslu_ecoli  | ydjF | hslU |
| P0A717 | ydjf_ecoli | kprs_ecoli  | ydjF | prs  |
| P0A9M0 | ydjf_ecoli | lon_ecoli   | ydjF | lon  |
| P0A9X4 | ydjf_ecoli | mreb_ecoli  | ydjF | mreB |
| P0AFG6 | ydjf_ecoli | odo2_ecoli  | ydjF | sucB |
| P0A7G6 | ydjf_ecoli | reca_ecoli  | ydjF | recA |
| P0ADY3 | ydjf_ecoli | rl14_ecoli  | ydjF | rpIN |
| P0ACIO | ydjf_ecoli | rob_ecoli   | ydjF | rob  |
| P0A7V8 | ydjf_ecoli | rs4_ecoli   | ydjF | rpsD |
| P21889 | ydjf_ecoli | syd_ecoli   | ydjF | aspS |
| P04152 | ydjf_ecoli | umuc_ecoli  | ydjF | umuC |
| P18843 | yead_ecoli | nade_ecoli  | yeaD | nadE |
| P28722 | yead_ecoli | yhca_ecoli  | yeaD | yhcA |
| P15723 | yeag_ecoli | dgtp_ecoli  | yeaG | dgt  |
| P0A988 | yeag_ecoli | dpo3b_ecoli | yeaG | dnaN |
| P76056 | yeag_ecoli | intr_ecoli  | yeaG | intR |
| P18843 | yeag_ecoli | nade_ecoli  | yeaG | nadE |
| P51981 | yeak_ecoli | aep_ecoli   | yeaK | ycjG |
| P0A6F5 | yeak_ecoli | ch60_ecoli  | yeaK | groL |
| P0A6B7 | yeak_ecoli | iscs_ecoli  | yeaK | iscS |
| P0A717 | yeak_ecoli | kprs_ecoli  | yeaK | prs  |
| P0A9X4 | yeak_ecoli | mreb_ecoli  | yeaK | mreB |
| P18843 | yeak_ecoli | nade_ecoli  | yeaK | nadE |
| P15288 | yeak_ecoli | pepd_ecoli  | yeaK | pepD |
| P0AA43 | yeak_ecoli | rsua_ecoli  | yeaK | rsuA |
| P0AG14 | yeak_ecoli | sohb_ecoli  | yeaK | sohB |
| P07913 | yeak_ecoli | tdh_ecoli   | yeaK | tdh  |
| P77221 | yeak_ecoli | yahg_ecoli  | yeaK | yahG |
| P06134 | yeaz_ecoli | ada_ecoli   | yeaZ | ada  |

|        |                            |                            |      |      |
|--------|----------------------------|----------------------------|------|------|
| P0A6D7 | <a href="#">yeaz_ecoli</a> | <a href="#">arok_ecoli</a> | yeaZ | aroK |
| P76250 | <a href="#">yeaz_ecoli</a> | <a href="#">dmlr_ecoli</a> | yeaZ | dmlR |
| P31574 | <a href="#">yeaz_ecoli</a> | <a href="#">fixb_ecoli</a> | yeaZ | fixB |
| P05852 | <a href="#">yeaz_ecoli</a> | <a href="#">gcp_ecoli</a>  | yeaZ | gcp  |
| P30140 | <a href="#">yeaz_ecoli</a> | <a href="#">thih_ecoli</a> | yeaZ | thiH |
| P0AG80 | <a href="#">yeaz_ecoli</a> | <a href="#">ugpb_ecoli</a> | yeaZ | ugpB |
| P76632 | <a href="#">yeaz_ecoli</a> | <a href="#">ygck_ecoli</a> | yeaZ | ygck |
| P39342 | <a href="#">yeaz_ecoli</a> | <a href="#">yjgr_ecoli</a> | yeaZ | yjgR |

|        |                            |                            |      |      |
|--------|----------------------------|----------------------------|------|------|
| P0ABE7 | <a href="#">yebc_ecoli</a> | <a href="#">c562_ecolx</a> | yebC | cybC |
| P0A6K3 | <a href="#">yebc_ecoli</a> | <a href="#">def_ecoli</a>  | yebC | def  |
| P0AET5 | <a href="#">yebc_ecoli</a> | <a href="#">hded_ecoli</a> | yebC | hdeD |
| P0A717 | <a href="#">yebc_ecoli</a> | <a href="#">kprs_ecoli</a> | yebC | prs  |
| P18843 | <a href="#">yebc_ecoli</a> | <a href="#">nade_ecoli</a> | yebC | nadE |
| P0ABL5 | <a href="#">yebc_ecoli</a> | <a href="#">napc_ecoli</a> | yebC | napC |
| P0ACP7 | <a href="#">yebc_ecoli</a> | <a href="#">purr_ecoli</a> | yebC | purR |
| P50457 | <a href="#">yebc_ecoli</a> | <a href="#">puue_ecoli</a> | yebC | puuE |
| P0AG44 | <a href="#">yebc_ecoli</a> | <a href="#">rl17_ecoli</a> | yebC | rplQ |
| P0AG59 | <a href="#">yebc_ecoli</a> | <a href="#">rs14_ecoli</a> | yebC | rpsN |
| P0A7X3 | <a href="#">yebc_ecoli</a> | <a href="#">rs9_ecoli</a>  | yebC | rpsI |
| P0A905 | <a href="#">yebc_ecoli</a> | <a href="#">slyb_ecoli</a> | yebC | slyB |
| P0A9K9 | <a href="#">yebc_ecoli</a> | <a href="#">slyd_ecoli</a> | yebC | slyD |
| P0ACG1 | <a href="#">yebc_ecoli</a> | <a href="#">stpa_ecoli</a> | yebC | stpA |
| P11875 | <a href="#">yebc_ecoli</a> | <a href="#">syr_ecoli</a>  | yebC | argS |
| P31142 | <a href="#">yebc_ecoli</a> | <a href="#">thtm_ecoli</a> | yebC | sseA |

|        |                            |                            |      |      |
|--------|----------------------------|----------------------------|------|------|
| P0A6F5 | <a href="#">yecC_ecoli</a> | <a href="#">ch60_ecoli</a> | yecC | groL |
| P0A9A9 | <a href="#">yecC_ecoli</a> | <a href="#">fur_ecoli</a>  | yecC | fur  |
| P0A7W1 | <a href="#">yecC_ecoli</a> | <a href="#">rs5_ecoli</a>  | yecC | rpsE |

|        |                            |                            |      |      |
|--------|----------------------------|----------------------------|------|------|
| P0A6Y8 | <a href="#">yedn_ecoli</a> | <a href="#">dnak_ecoli</a> | yedN | dnaK |
| P18843 | <a href="#">yedn_ecoli</a> | <a href="#">nade_ecoli</a> | yedN | nadE |
| P0AFJ5 | <a href="#">yedn_ecoli</a> | <a href="#">phob_ecoli</a> | yedN | phoB |

|        |            |            |      |      |
|--------|------------|------------|------|------|
| P0A6F5 | yefg_ecoli | ch60_ecoli | yefG | groL |
| P76559 | yefg_ecoli | ypfg_ecoli | yefG | ypfG |

|        |            |            |      |      |
|--------|------------|------------|------|------|
| P25889 | yeit_ecoli | yeia_ecoli | yeiT | yeiA |
|--------|------------|------------|------|------|

|        |            |            |      |      |
|--------|------------|------------|------|------|
| P0A6F5 | yeja_ecoli | ch60_ecoli | yejA | groL |
| P10408 | yeja_ecoli | seca_ecoli | yejA | secA |

|        |            |            |      |       |
|--------|------------|------------|------|-------|
| P0A6F5 | yfaa_ecoli | ch60_ecoli | yfaA | groL  |
| P0AC41 | yfaa_ecoli | dhsa_ecoli | yfaA | sdhA  |
| P09832 | yfaa_ecoli | gltD_ecoli | yfaA | gltD  |
| P60422 | yfaa_ecoli | rl2_ecoli  | yfaA | rplB  |
| P77698 | yfaa_ecoli | ybck_ecoli | yfaA | ybckK |

|        |            |            |      |      |
|--------|------------|------------|------|------|
| P0A6Y8 | yfcb_ecoli | dnak_ecoli | yfcb | dnak |
| P76114 | yfcb_ecoli | mcbR_ecoli | yfcb | mcbR |
| P60438 | yfcb_ecoli | rl3_ecoli  | yfcb | rplC |
| P60438 | yfcb_ecoli | rl3_ecoli  | yfcb | rplC |
| P0A7R5 | yfcb_ecoli | rs10_ecoli | yfcb | rpsJ |
| P76072 | yfcb_ecoli | stfr_ecoli | yfcb | stfR |
| P0A850 | yfcb_ecoli | tig_ecoli  | yfcb | tig  |
| P0A850 | yfcb_ecoli | tig_ecoli  | yfcb | tig  |

|        |            |            |      |      |
|--------|------------|------------|------|------|
| P37330 | yfcz_ecoli | masz_ecoli | yfcZ | glcB |
| P09373 | yfcz_ecoli | pflb_ecoli | yfcZ | pflB |
| P0ADY7 | yfcz_ecoli | rl16_ecoli | yfcZ | rplP |
| P60422 | yfcz_ecoli | rl2_ecoli  | yfcZ | rplB |
| P0A7V3 | yfcz_ecoli | rs3_ecoli  | yfcZ | rpsC |
| P39306 | yfcz_ecoli | ulaf_ecoli | yfcZ | ulaF |



|        |            |            |      |      |
|--------|------------|------------|------|------|
| P69407 | yfgm_ecoli | rcsb_ecoli | yfgM | rcsB |
| P0AEB2 | yfif_ecoli | daca_ecoli | yfiF | dacA |
| P0ACF0 | yfif_ecoli | dbha_ecoli | yfiF | hupA |
| P0A9P6 | yfif_ecoli | dead_ecoli | yfiF | deaD |
| P30128 | yfif_ecoli | greb_ecoli | yfiF | greB |
| P28631 | yfif_ecoli | holb_ecoli | yfiF | holB |
| P37182 | yfif_ecoli | hybd_ecoli | yfiF | hybD |
| P0A6X7 | yfif_ecoli | ihfa_ecoli | yfiF | ihfA |
| P33362 | yfif_ecoli | osmf_ecoli | yfiF | osmF |
| P23830 | yfif_ecoli | pss_ecoli  | yfiF | pssA |
| P0A7L0 | yfif_ecoli | rl1_ecoli  | yfiF | rplA |
| P0A7L0 | yfif_ecoli | rl1_ecoli  | yfiF | rplA |
| P0ADY7 | yfif_ecoli | rl16_ecoli | yfiF | rplP |
| P0AG44 | yfif_ecoli | rl17_ecoli | yfiF | rplQ |
| P0C018 | yfif_ecoli | rl18_ecoli | yfiF | rplR |
| P60422 | yfif_ecoli | rl2_ecoli  | yfiF | rplB |
| P60422 | yfif_ecoli | rl2_ecoli  | yfiF | rplB |
| P60422 | yfif_ecoli | rl2_ecoli  | yfiF | rplB |
| P0A7L3 | yfif_ecoli | rl20_ecoli | yfiF | rplT |
| P61175 | yfif_ecoli | rl22_ecoli | yfiF | rplV |
| P60438 | yfif_ecoli | rl3_ecoli  | yfiF | rplC |
| P60438 | yfif_ecoli | rl3_ecoli  | yfiF | rplC |
| P0AG55 | yfif_ecoli | rl6_ecoli  | yfiF | rplF |
| P0A7R1 | yfif_ecoli | rl9_ecoli  | yfiF | rplI |
| P75864 | yfif_ecoli | rlml_ecoli | yfiF | rlmL |
| P37765 | yfif_ecoli | rlub_ecoli | yfiF | rluB |
| P0AA39 | yfif_ecoli | rluc_ecoli | yfiF | rluC |
| P21499 | yfif_ecoli | rnrc_ecoli | yfiF | rnrc |
| P0A7R9 | yfif_ecoli | rs11_ecoli | yfiF | rpsK |
| P0A7S3 | yfif_ecoli | rs12_ecoli | yfiF | rpsL |
| P0A7S9 | yfif_ecoli | rs13_ecoli | yfiF | rpsM |
| P0A7S9 | yfif_ecoli | rs13_ecoli | yfiF | rpsM |
| P0AG59 | yfif_ecoli | rs14_ecoli | yfiF | rpsN |
| P0ADZ4 | yfif_ecoli | rs15_ecoli | yfiF | rpsO |
| P0A7T3 | yfif_ecoli | rs16_ecoli | yfiF | rpsP |
| P0A7T7 | yfif_ecoli | rs18_ecoli | yfiF | rpsR |

|        |            |            |      |      |
|--------|------------|------------|------|------|
| P0A7U3 | yfif_ecoli | rs19_ecoli | yfiF | rpsS |
| P0A7U7 | yfif_ecoli | rs20_ecoli | yfiF | rpsT |
| P68679 | yfif_ecoli | rs21_ecoli | yfiF | rpsU |
| P0A7V3 | yfif_ecoli | rs3_ecoli  | yfiF | rpsC |
| P0A7V8 | yfif_ecoli | rs4_ecoli  | yfiF | rpsD |
| P0A7V8 | yfif_ecoli | rs4_ecoli  | yfiF | rpsD |
| P0A7V8 | yfif_ecoli | rs4_ecoli  | yfiF | rpsD |
| P0A7W1 | yfif_ecoli | rs5_ecoli  | yfiF | rpsE |
| P0A7W1 | yfif_ecoli | rs5_ecoli  | yfiF | rpsE |
| P02358 | yfif_ecoli | rs6_ecoli  | yfiF | rpsF |
| P02358 | yfif_ecoli | rs6_ecoli  | yfiF | rpsF |
| P02359 | yfif_ecoli | rs7_ecoli  | yfiF | rpsG |
| P02359 | yfif_ecoli | rs7_ecoli  | yfiF | rpsG |
| P0A7W7 | yfif_ecoli | rs8_ecoli  | yfiF | rpsH |
| P77499 | yfif_ecoli | sufc_ecoli | yfiF | sufC |
| P75749 | yfif_ecoli | ybgp_ecoli | yfiF | ybgP |
| P76578 | yfif_ecoli | yfhm_ecoli | yfiF | yfhM |

|        |            |            |      |      |
|--------|------------|------------|------|------|
| P31554 | ygey_ecoli | lptd_ecoli | ygeY | lptD |
| P06721 | ygey_ecoli | metc_ecoli | ygeY | metC |
| P37906 | ygey_ecoli | puub_ecoli | ygeY | puuB |
| P24215 | ygey_ecoli | uxua_ecoli | ygeY | uxuA |

|        |            |            |      |      |
|--------|------------|------------|------|------|
| P18843 | ygfz_ecoli | nade_ecoli | ygfZ | nadE |
| P0A7L3 | ygfz_ecoli | rl20_ecoli | ygfZ | rpIT |
| P76518 | ygfz_ecoli | yfde_ecoli | ygfZ | yfdE |
| P0ADK8 | ygfz_ecoli | yibl_ecoli | ygfZ | yibL |
| P0A6Y8 | ygha_ecoli | dnak_ecoli | yghA | dnaK |

|        |            |             |      |      |
|--------|------------|-------------|------|------|
| P0A988 | ygha_ecoli | dpo3b_ecoli | yghA | dnaN |
| P0ACL7 | ygha_ecoli | lldr_ecoli  | yghA | lldR |
| P39376 | ygha_ecoli | yjie_ecoli  | yghA | yjiE |
| P18843 | ygin_ecoli | nade_ecoli  | ygiN | nadE |
| P0ABE7 | yhbs_ecoli | c562_ecolx  | yhbS | cybC |
| P0AG44 | yhbs_ecoli | rl17_ecoli  | yhbS | rplQ |
| P0A7K6 | yhbs_ecoli | rl19_ecoli  | yhbS | rplS |
| P60422 | yhbs_ecoli | rl2_ecoli   | yhbS | rplB |
| P0A7X3 | yhbs_ecoli | rs9_ecoli   | yhbS | rpsI |
| P64599 | yhbs_ecoli | yhbt_ecoli  | yhbS | yhbT |
| P32685 | yhbs_ecoli | yjbd_ecoli  | yhbS | yjbD |
| P15288 | yhde_ecoli | pepd_ecoli  | yhdE | pepD |
| P40719 | yhde_ecoli | qsec_ecoli  | yhdE | qseC |
| P0A6F5 | yhet_ecoli | ch60_ecoli  | yheT | groL |
| P0A7U7 | yhet_ecoli | rs20_ecoli  | yheT | rpsT |
| P0AEF0 | yhgf_ecoli | dnac_ecoli  | yhgF | dnaC |
| P04805 | yhgf_ecoli | sye_ecoli   | yhgF | gltX |
| Q47151 | yhhk_ecoli | yafI_ecoli  | yhhK | yafL |

|        |                            |                            |      |      |
|--------|----------------------------|----------------------------|------|------|
| P0AD53 | <a href="#">yiag_ecoli</a> | <a href="#">ygac_ecoli</a> | viaG | ygaC |
| P0ADK8 | <a href="#">yiag_ecoli</a> | <a href="#">yibl_ecoli</a> | viaG | yibL |
| P0A6Y8 | <a href="#">yiba_ecoli</a> | <a href="#">dnak_ecoli</a> | yibA | dnaK |
| P17888 | <a href="#">yiba_ecoli</a> | <a href="#">pria_ecoli</a> | yibA | priA |
| P0A7V0 | <a href="#">yiba_ecoli</a> | <a href="#">rs2_ecoli</a>  | yibA | rpsB |
| P43672 | <a href="#">yiba_ecoli</a> | <a href="#">uup_ecoli</a>  | yibA | uup  |
| P00722 | <a href="#">yibf_ecoli</a> | <a href="#">bgal_ecoli</a> | yibF | lacZ |
| P42604 | <a href="#">yief_ecoli</a> | <a href="#">uxaa_ecoli</a> | yieF | uxaA |
| P77247 | <a href="#">yief_ecoli</a> | <a href="#">ynic_ecoli</a> | yieF | yniC |
| P0AE08 | <a href="#">yiht_ecoli</a> | <a href="#">ahpc_ecoli</a> | yihT | ahpC |
| P0A6K3 | <a href="#">yiht_ecoli</a> | <a href="#">def_ecoli</a>  | yihT | def  |
| P07821 | <a href="#">yiht_ecoli</a> | <a href="#">fhuc_ecoli</a> | yihT | fhuC |
| P18843 | <a href="#">yiht_ecoli</a> | <a href="#">nade_ecoli</a> | yihT | nadE |
| P36566 | <a href="#">yiht_ecoli</a> | <a href="#">smta_ecoli</a> | yihT | smtA |
| P0AAM1 | <a href="#">yiis_ecoli</a> | <a href="#">cybh_ecoli</a> | yiiS | hyaC |
| P13035 | <a href="#">yiis_ecoli</a> | <a href="#">glpd_ecoli</a> | yiiS | glpD |
| P0A6W5 | <a href="#">yiis_ecoli</a> | <a href="#">grea_ecoli</a> | yiiS | greA |
| P0ACF8 | <a href="#">yiis_ecoli</a> | <a href="#">hns_ecoli</a>  | yiiS | hns  |
| P0AAC8 | <a href="#">yiis_ecoli</a> | <a href="#">isca_ecoli</a> | yiiS | isca |
| P37330 | <a href="#">yiis_ecoli</a> | <a href="#">masz_ecoli</a> | yiiS | glcB |
| P18843 | <a href="#">yiis_ecoli</a> | <a href="#">nade_ecoli</a> | yiiS | nadE |
| P76078 | <a href="#">yiis_ecoli</a> | <a href="#">paab_ecoli</a> | yiiS | paaB |
| P09373 | <a href="#">yiis_ecoli</a> | <a href="#">pflb_ecoli</a> | yiiS | pflB |
| P0AFJ5 | <a href="#">yiis_ecoli</a> | <a href="#">phob_ecoli</a> | yiiS | phoB |
| P32156 | <a href="#">yiis_ecoli</a> | <a href="#">rham_ecoli</a> | yiiS | rhaM |
| P60723 | <a href="#">yiis_ecoli</a> | <a href="#">rl4_ecoli</a>  | yiiS | rpID |
| P0AG55 | <a href="#">yiis_ecoli</a> | <a href="#">rl6_ecoli</a>  | yiiS | rpIF |
| P0A7S9 | <a href="#">yiis_ecoli</a> | <a href="#">rs13_ecoli</a> | yiiS | rpsM |
| P0A7V0 | <a href="#">yiis_ecoli</a> | <a href="#">rs2_ecoli</a>  | yiiS | rpsB |
| P0A7U7 | <a href="#">yiis_ecoli</a> | <a href="#">rs20_ecoli</a> | yiiS | rpsT |

|        |            |            |      |      |
|--------|------------|------------|------|------|
| P0A7W1 | yiis_ecoli | rs5_ecoli  | yiiS | rpsE |
| P0A6A0 | yiis_ecoli | ubib_ecoli | yiiS | ubiB |
| P0AAB8 | yiis_ecoli | uspd_ecoli | yiiS | uspd |
| P0AB61 | yiis_ecoli | ycin_ecoli | yiiS | ycin |
| P37640 | yiis_ecoli | yhjb_ecoli | yiiS | yhjB |
| P64562 | yiis_ecoli | yqfe_ecoli | yiiS | yqfE |
| P0AF36 | yiis_ecoli | zapb_ecoli | yiiS | zapB |

|        |            |            |      |      |
|--------|------------|------------|------|------|
| P0A7D7 | yjbr_ecoli | pur7_ecoli | yjbR | purC |
|--------|------------|------------|------|------|

|        |            |            |      |      |
|--------|------------|------------|------|------|
| P0A6F5 | yjee_ecoli | ch60_ecoli | yjeE | groL |
| P69910 | yjee_ecoli | dceb_ecoli | yjeE | gadB |
| P0A6Y8 | yjee_ecoli | dnak_ecoli | yjeE | dnaK |
| P0A9B2 | yjee_ecoli | g3p1_ecoli | yjeE | gapA |
| P25665 | yjee_ecoli | mete_ecoli | yjeE | metE |
| P18843 | yjee_ecoli | nade_ecoli | yjeE | nadE |
| P76078 | yjee_ecoli | paab_ecoli | yjeE | paaB |
| P76084 | yjee_ecoli | paai_ecoli | yjeE | paal |
| P09373 | yjee_ecoli | pflb_ecoli | yjeE | pflB |
| P0A7D4 | yjee_ecoli | pura_ecoli | yjeE | purA |
| P0ADY3 | yjee_ecoli | rl14_ecoli | yjeE | rpIN |
| P0A7K2 | yjee_ecoli | rl7_ecoli  | yjeE | rpIL |
| P0AG67 | yjee_ecoli | rs1_ecoli  | yjeE | rpsA |
| P0A7V0 | yjee_ecoli | rs2_ecoli  | yjeE | rpsB |
| P0A7V3 | yjee_ecoli | rs3_ecoli  | yjeE | rpsC |
| P0A7V8 | yjee_ecoli | rs4_ecoli  | yjeE | rpsD |
| P0A7W1 | yjee_ecoli | rs5_ecoli  | yjeE | rpsE |
| P0ADQ2 | yjee_ecoli | yiid_ecoli | yjeE | yiiD |
| P31806 | yjee_ecoli | yjef_ecoli | yjeE | yjeF |
| P39283 | yjee_ecoli | yjen_ecoli | yjeE | yjeN |

|        |            |            |      |      |
|--------|------------|------------|------|------|
| P0A9P0 | yjef_ecoli | dldh_ecoli | yjeF | lpdA |
| P0A9P0 | yjef_ecoli | dldh_ecoli | yjeF | lpdA |
| P22186 | yjef_ecoli | mraz_ecoli | yjeF | mraZ |
| P22186 | yjef_ecoli | mraz_ecoli | yjeF | mraZ |
| P06959 | yjef_ecoli | odp2_ecoli | yjeF | aceF |
| P06959 | yjef_ecoli | odp2_ecoli | yjeF | aceF |
| P16918 | yjef_ecoli | rhsc_ecoli | yjeF | rhsC |
| P76578 | yjef_ecoli | yfhm_ecoli | yjeF | yfhM |
| P0AF67 | yjef_ecoli | yjee_ecoli | yjeF | yjeE |

|        |            |            |      |      |
|--------|------------|------------|------|------|
| P0A9P0 | yjgd_ecoli | dldh_ecoli | yjgD | lpdA |
| P45539 | yjgd_ecoli | frla_ecoli | yjgD | frlA |
| P0A6W9 | yjgd_ecoli | gsh1_ecoli | yjgD | gshA |
| P60560 | yjgd_ecoli | guac_ecoli | yjgD | guaC |
| P37773 | yjgd_ecoli | mpl_ecoli  | yjgD | mpl  |
| P06959 | yjgd_ecoli | odp2_ecoli | yjgD | aceF |
| P77247 | yjgd_ecoli | ynic_ecoli | yjgD | yniC |

|        |            |            |      |      |
|--------|------------|------------|------|------|
| P0A6F5 | yjie_ecoli | ch60_ecoli | yjie | groL |
|--------|------------|------------|------|------|

|        |            |            |      |      |
|--------|------------|------------|------|------|
| P0A6Y8 | yjji_ecoli | dnak_ecoli | yjji | dnak |
|--------|------------|------------|------|------|

|        |            |            |      |      |
|--------|------------|------------|------|------|
| P18843 | yjjk_ecoli | nade_ecoli | yjjk | nadE |
|--------|------------|------------|------|------|

|        |            |            |      |      |
|--------|------------|------------|------|------|
| P0A964 | ynce_ecoli | chew_ecoli | ynce | cheW |
|--------|------------|------------|------|------|

|        |            |            |      |      |
|--------|------------|------------|------|------|
| P0A9A9 | yqge_ecoli | fur_ecoli  | yqgE | fur  |
| P77188 | yqge_ecoli | matc_ecoli | yqgE | matC |
| P33602 | yqge_ecoli | nuog_ecoli | yqgE | nuoG |
| P15288 | yqge_ecoli | pepd_ecoli | yqgE | pepD |
| P02413 | yqge_ecoli | rl15_ecoli | yqgE | rplO |
| P60422 | yqge_ecoli | rl2_ecoli  | yqgE | rplB |
| P0A7V0 | yqge_ecoli | rs2_ecoli  | yqgE | rpsB |
| P0AGL7 | yqge_ecoli | rsme_ecoli | yqgE | rsmE |
| P52645 | yqge_ecoli | ydbh_ecoli | yqgE | ydbH |
| P13035 | yqhd_ecoli | glpd_ecoli | yqhD | glpD |
| P0A9K9 | yqhd_ecoli | slyd_ecoli | yqhD | slyD |
| P31552 | yqik_ecoli | caic_ecoli | yqiK | caiC |
| P38104 | yqik_ecoli | rspa_ecoli | yqiK | rspA |
| P77129 | yqik_ecoli | ylbe_ecoli | yqiK | ylbE |
| P77269 | yqik_ecoli | yphf_ecoli | yqiK | yphF |
| P0AEU0 | yqji_ecoli | hisj_ecoli | yqjI | hisJ |
| P0AA16 | yqji_ecoli | ompr_ecoli | yqjI | ompR |
| P0A6F5 | ytfm_ecoli | ch60_ecoli | ytfM | groL |

|        |            |            |      |      |
|--------|------------|------------|------|------|
| P31551 | zapa_ecoli | caid_ecoli | zapA | caid |
| P0A722 | zapa_ecoli | lpxa_ecoli | zapA | lpxA |
| P0A884 | zapa_ecoli | tysy_ecoli | zapA | thyA |







|                                    |                           |
|------------------------------------|---------------------------|
| tandem affinity purification       | Gully et al. (2006)       |
| pull down                          | Butland et al. (2005)     |
| pull down                          | Butland et al. (2005)     |
| pull down                          | Butland et al. (2005)     |
| tandem affinity purification       | Gully et al. (2006)       |
| pull down                          | Butland et al. (2005)     |
| pull down                          | Butland et al. (2005)     |
| pull down                          | Butland et al. (2005)     |
| adenylate cyclase complementation  | Gully et al. (2006)       |
| pull down                          | Butland et al. (2005)     |
| blue native page                   | Lasserre et al. (2006)    |
| pull down                          | Butland et al. (2005)     |
| pull down                          | Butland et al. (2005)     |
| pull down                          | Butland et al. (2005)     |
| pull down                          | Butland et al. (2005)     |
| pull down                          | Butland et al. (2005)     |
| pull down                          | Butland et al. (2005)     |
| pull down                          | Butland et al. (2005)     |
| pull down                          | Butland et al. (2005)     |
| pull down                          | Butland et al. (2005)     |
| blue native page                   | Lasserre et al. (2006)    |
| tandem affinity purification       | Gully et al. (2006)       |
| pull down                          | Butland et al. (2005)     |
| tandem affinity purification       | Gully et al. (2006)       |
| pull down                          | Butland et al. (2005)     |
| pull down                          | Butland et al. (2005)     |
| affinity chromatography technology | Gully et al. (2006)       |
| affinity chromatography technology | Gully et al. (2006)       |
| tandem affinity purification       | Gully et al. (2006)       |
| pull down                          | Butland et al. (2005)     |
| pull down                          | Butland et al. (2005)     |
| pull down                          | Butland et al. (2005)     |
| pull down                          | Butland et al. (2005)     |
| pull down                          | Butland et al. (2005)     |
| <br>                               |                           |
| pull down                          | Arifuzzaman et al. (2006) |
| <br>                               |                           |
| pull down                          | Arifuzzaman et al. (2006) |
| pull down                          | Arifuzzaman et al. (2006) |
| pull down                          | Arifuzzaman et al. (2006) |
| pull down                          | Arifuzzaman et al. (2006) |
| pull down                          | Arifuzzaman et al. (2006) |



pull down  
pull down

Butland et al. (2005)  
Butland et al. (2005)

pull down  
pull down

Arifuzzaman et al. (2006)  
Arifuzzaman et al. (2006)

pull down  
pull down  
pull down  
pull down  
pull down  
pull down

Butland et al. (2005)  
Butland et al. (2005)

pull down  
pull down  
pull down  
pull down

Butland et al. (2005)  
Butland et al. (2005)  
Butland et al. (2005)  
Butland et al. (2005)

pull down  
pull down  
pull down  
pull down  
pull down  
pull down  
pull down

Arifuzzaman et al. (2006)  
Arifuzzaman et al. (2006)

pull down  
pull down  
pull down  
pull down  
pull down

Arifuzzaman et al. (2006)  
Arifuzzaman et al. (2006)  
Arifuzzaman et al. (2006)  
Arifuzzaman et al. (2006)  
Arifuzzaman et al. (2006)

pull down  
pull down  
pull down  
pull down  
pull down

Butland et al. (2005)  
Arifuzzaman et al. (2006)  
Arifuzzaman et al. (2006)  
Butland et al. (2005)  
Butland et al. (2005)



pull down  
pull down

Butland et al. (2005)  
Butland et al. (2005)

pull down  
pull down  
pull down  
pull down

Butland et al. (2005)  
Butland et al. (2005)  
Arifuzzaman et al. (2006)  
Arifuzzaman et al. (2006)

pull down  
pull down  
pull down

Arifuzzaman et al. (2006)  
Arifuzzaman et al. (2006)  
Arifuzzaman et al. (2006)

pull down

Arifuzzaman et al. (2006)

pull down  
pull down  
pull down

Arifuzzaman et al. (2006)  
Arifuzzaman et al. (2006)  
Arifuzzaman et al. (2006)

pull down  
pull down  
pull down

Arifuzzaman et al. (2006)  
Butland et al. (2005)  
Arifuzzaman et al. (2006)

pull down  
pull down  
pull down

Arifuzzaman et al. (2006)  
Arifuzzaman et al. (2006)  
Arifuzzaman et al. (2006)

|                                                   |                           |
|---------------------------------------------------|---------------------------|
| pull down                                         | Arifuzzaman et al. (2006) |
| pull down                                         | Arifuzzaman et al. (2006) |
| pull down                                         | Arifuzzaman et al. (2006) |
| pull down                                         | Arifuzzaman et al. (2006) |
| blue native page                                  | Lasserre et al. (2006)    |
| pull down                                         | Butland et al. (2005)     |
| comigration in non denaturing gel electrophoresis | Huang et al. (2006)       |
| comigration in non denaturing gel electrophoresis | Huang et al. (2006)       |
| blue native page                                  | Stenberg et al. (2005)    |
| blue native page                                  | Stenberg et al. (2005)    |
| blue native page                                  | Lasserre et al. (2006)    |
| blue native page                                  | Stenberg et al. (2005)    |
| blue native page                                  | Stenberg et al. (2005)    |
| comigration in non denaturing gel electrophoresis | Huang et al. (2006)       |
| comigration in non denaturing gel electrophoresis | Huang et al. (2006)       |
| pull down                                         | Arifuzzaman et al. (2006) |
| pull down                                         | Arifuzzaman et al. (2006) |
| comigration in non denaturing gel electrophoresis | Huang et al. (2006)       |
| comigration in non denaturing gel electrophoresis | Huang et al. (2006)       |
| comigration in non denaturing gel electrophoresis | Huang et al. (2006)       |
| comigration in non denaturing gel electrophoresis | Huang et al. (2006)       |
| pull down                                         | Arifuzzaman et al. (2006) |
| blue native page                                  | Lasserre et al. (2006)    |
| pull down                                         | Arifuzzaman et al. (2006) |
| pull down                                         | Arifuzzaman et al. (2006) |
| pull down                                         | Arifuzzaman et al. (2006) |
| pull down                                         | Arifuzzaman et al. (2006) |
| pull down                                         | Arifuzzaman et al. (2006) |
| pull down                                         | Arifuzzaman et al. (2006) |
| pull down                                         | Arifuzzaman et al. (2006) |
| pull down                                         | Arifuzzaman et al. (2006) |
| pull down                                         | Arifuzzaman et al. (2006) |
| pull down                                         | Butland et al. (2005)     |
| pull down                                         | Butland et al. (2005)     |
| pull down                                         | Butland et al. (2005)     |
| pull down                                         | Butland et al. (2005)     |
| pull down                                         | Butland et al. (2005)     |



pull down

Butland et al. (2005)

pull down  
pull down  
pull down  
pull down  
pull down  
pull down  
pull down

Arifuzzaman et al. (2006)  
Arifuzzaman et al. (2006)

pull down  
pull down  
pull down  
pull down

Arifuzzaman et al. (2006)  
Arifuzzaman et al. (2006)  
Arifuzzaman et al. (2006)  
Arifuzzaman et al. (2006)

pull down  
pull down  
pull down  
pull down  
pull down  
pull down  
pull down

Arifuzzaman et al. (2006)  
Arifuzzaman et al. (2006)

pull down  
pull down  
pull down  
pull down  
pull down  
pull down

Arifuzzaman et al. (2006)  
Arifuzzaman et al. (2006)

pull down  
pull down

Arifuzzaman et al. (2006)  
Arifuzzaman et al. (2006)

pull down  
pull down

Arifuzzaman et al. (2006)  
Arifuzzaman et al. (2006)





pull down  
pull down

Butland et al. (2005)  
Arifuzzaman et al. (2006)  
Butland et al. (2005)

pull down  
pull down

Arifuzzaman et al. (2006)  
Arifuzzaman et al. (2006)

x-ray crystallography

Yajima et al. (2004)

pull down

Arifuzzaman et al. (2006)

pull down  
pull down  
pull down  
pull down  
cosedimentation in solution  
pull down  
pull down  
pull down  
fluorescent resonance energy transfer  
fluorescent resonance energy transfer  
pull down  
pull down  
pull down  
pull down  
pull down  
pull down  
pull down

Butland et al. (2005)  
Butland et al. (2005)  
Butland et al. (2005)  
Butland et al. (2005)  
Koike-Takeshita et al. (2006)  
Butland et al. (2005)  
Butland et al. (2005)  
Butland et al. (2005)  
Sharma et al. (2008)  
Sharma et al. (2008)  
Arifuzzaman et al. (2006)  
Butland et al. (2005)  
Arifuzzaman et al. (2006)  
Arifuzzaman et al. (2006)  
Butland et al. (2005)  
Arifuzzaman et al. (2006)  
Butland et al. (2005)

|                                                   |                               |
|---------------------------------------------------|-------------------------------|
| pull down                                         | Butland et al. (2005)         |
| pull down                                         | Butland et al. (2005)         |
| pull down                                         | Butland et al. (2005)         |
| pull down                                         | Butland et al. (2005)         |
| cosedimentation through density gradient          | Bochkareva et al. (2002)      |
| cosedimentation in solution                       | Koike-Takeshita et al. (2006) |
| pull down                                         | Butland et al. (2005)         |
| pull down                                         | Butland et al. (2005)         |
| fluorescence polarization spectroscopy            | Sharma et al. (2008)          |
| fluorescence correlation spectroscopy             | Sharma et al. (2008)          |
| fluorescent resonance energy transfer             | Sharma et al. (2008)          |
| molecular sieving                                 | Koike-Takeshita et al. (2006) |
| pull down                                         | Butland et al. (2005)         |
| pull down                                         | Arifuzzaman et al. (2006)     |
| pull down                                         | Butland et al. (2005)         |
| pull down                                         | Arifuzzaman et al. (2006)     |
| comigration in non denaturing gel electrophoresis | Pan et al.                    |
| pull down                                         | Arifuzzaman et al. (2006)     |
| comigration in non denaturing gel electrophoresis | Pan et al.                    |
| cosedimentation through density gradient          | Bochkareva et al. (2002)      |
| pull down                                         | Butland et al. (2005)         |
| pull down                                         | Butland et al. (2005)         |
| pull down                                         | Butland et al. (2005)         |
| pull down                                         | Butland et al. (2005)         |
| pull down                                         | Arifuzzaman et al. (2006)     |
| pull down                                         | Arifuzzaman et al. (2006)     |
| comigration in non denaturing gel electrophoresis | Pan et al.                    |
| pull down                                         | Arifuzzaman et al. (2006)     |
| pull down                                         | Arifuzzaman et al. (2006)     |
| pull down                                         | Arifuzzaman et al. (2006)     |
| pull down                                         | Arifuzzaman et al. (2006)     |
| pull down                                         | Arifuzzaman et al. (2006)     |
| pull down                                         | Butland et al. (2005)         |
| pull down                                         | Arifuzzaman et al. (2006)     |
| pull down                                         | Butland et al. (2005)         |
| x-ray crystallography                             | Zeth et al. (2002)            |
| x-ray crystallography                             | Guo et al. (2002)             |





pull down  
pull down  
pull down

Arifuzzaman et al. (2006)  
Arifuzzaman et al. (2006)  
Arifuzzaman et al. (2006)

pull down  
pull down  
pull down  
pull down

Butland et al. (2005)  
Butland et al. (2005)  
Butland et al. (2005)  
Butland et al. (2005)

pull down  
blue native page  
pull down  
blue native page  
pull down  
pull down  
pull down  
pull down  
pull down  
pull down

Butland et al. (2005)  
Arifuzzaman et al. (2006)  
Butland et al. (2005)  
Butland et al. (2005)  
Butland et al. (2005)  
Lasserre et al. (2006)  
Butland et al. (2005)  
Lasserre et al. (2006)  
Butland et al. (2005)  
Butland et al. (2005)  
Arifuzzaman et al. (2006)  
Butland et al. (2005)  
Butland et al. (2005)  
Butland et al. (2005)  
Butland et al. (2005)







pull down  
pull down

Butland et al. (2005)  
Butland et al. (2005)

blue native page  
blue native page

Stenberg et al. (2005)  
Stenberg et al. (2005)

pull down  
pull down  
pull down

Arifuzzaman et al. (2006)  
Arifuzzaman et al. (2006)  
Arifuzzaman et al. (2006)

pull down  
pull down  
pull down  
pull down

Arifuzzaman et al. (2006)  
Arifuzzaman et al. (2006)  
Arifuzzaman et al. (2006)  
Arifuzzaman et al. (2006)

pull down

Arifuzzaman et al. (2006)

pull down

Arifuzzaman et al. (2006)

pull down

Arifuzzaman et al. (2006)

pull down  
pull down  
pull down  
pull down  
pull down

Arifuzzaman et al. (2006)  
Arifuzzaman et al. (2006)  
Arifuzzaman et al. (2006)  
Arifuzzaman et al. (2006)  
Arifuzzaman et al. (2006)

comigration in non denaturing gel electrophoresis  
comigration in non denaturing gel electrophoresis

Pan et al.  
Pan et al.

|                  |                           |
|------------------|---------------------------|
| pull down        | Arifuzzaman et al. (2006) |
| pull down        | Arifuzzaman et al. (2006) |
| pull down        | Arifuzzaman et al. (2006) |
| pull down        | Arifuzzaman et al. (2006) |
| blue native page | Lasserre et al. (2006)    |
| pull down        | Arifuzzaman et al. (2006) |
| pull down        | Arifuzzaman et al. (2006) |
| pull down        | Butland et al. (2005)     |
| pull down        | Butland et al. (2005)     |
| pull down        | Arifuzzaman et al. (2006) |
| pull down        | Butland et al. (2005)     |
| pull down        | Arifuzzaman et al. (2006) |
| pull down        | Arifuzzaman et al. (2006) |
| pull down        | Arifuzzaman et al. (2006) |
| pull down        | Butland et al. (2005)     |
| pull down        | Butland et al. (2005)     |
| pull down        | Arifuzzaman et al. (2006) |
| pull down        | Arifuzzaman et al. (2006) |
| pull down        | Arifuzzaman et al. (2006) |
| pull down        | Butland et al. (2005)     |
| pull down        | Arifuzzaman et al. (2006) |
| pull down        | Arifuzzaman et al. (2006) |
| pull down        | Arifuzzaman et al. (2006) |
| pull down        | Butland et al. (2005)     |
| pull down        | Arifuzzaman et al. (2006) |
| pull down        | Arifuzzaman et al. (2006) |
| pull down        | Butland et al. (2005)     |



|                                                   |                           |
|---------------------------------------------------|---------------------------|
| pull down                                         | Arifuzzaman et al. (2006) |
| pull down                                         | Butland et al. (2005)     |
| pull down                                         | Butland et al. (2005)     |
| pull down                                         | Arifuzzaman et al. (2006) |
| comigration in non denaturing gel electrophoresis | Huang et al. (2006)       |
| comigration in non denaturing gel electrophoresis | Huang et al. (2006)       |
| comigration in non denaturing gel electrophoresis | Huang et al. (2006)       |
| comigration in non denaturing gel electrophoresis | Huang et al. (2006)       |
| comigration in non denaturing gel electrophoresis | Huang et al. (2006)       |
| pull down                                         | Butland et al. (2005)     |
| pull down                                         | Arifuzzaman et al. (2006) |
| comigration in non denaturing gel electrophoresis | Huang et al. (2006)       |

|           |                           |
|-----------|---------------------------|
| pull down | Arifuzzaman et al. (2006) |
| pull down | Butland et al. (2005)     |
| pull down | Arifuzzaman et al. (2006) |
| pull down | Butland et al. (2005)     |
| pull down | Butland et al. (2005)     |

|           |                           |
|-----------|---------------------------|
| pull down | Arifuzzaman et al. (2006) |
| pull down | Arifuzzaman et al. (2006) |
| pull down | Arifuzzaman et al. (2006) |
| pull down | Butland et al. (2005)     |
| pull down | Arifuzzaman et al. (2006) |
| pull down | Arifuzzaman et al. (2006) |
| pull down | Butland et al. (2005)     |
| pull down | Butland et al. (2005)     |
| pull down | Arifuzzaman et al. (2006) |
| pull down | Butland et al. (2005)     |
| pull down | Butland et al. (2005)     |
| pull down | Butland et al. (2005)     |
| pull down | Butland et al. (2005)     |
| pull down | Butland et al. (2005)     |
| pull down | Butland et al. (2005)     |
| pull down | Butland et al. (2005)     |
| pull down | Butland et al. (2005)     |
| pull down | Butland et al. (2005)     |
| pull down | Arifuzzaman et al. (2006) |

|           |                           |
|-----------|---------------------------|
| pull down | Arifuzzaman et al. (2006) |
| pull down | Arifuzzaman et al. (2006) |
| pull down | Arifuzzaman et al. (2006) |

|           |                           |
|-----------|---------------------------|
| pull down | Arifuzzaman et al. (2006) |
|-----------|---------------------------|







pull down  
pull down  
pull down  
pull down

Butland et al. (2005)  
Butland et al. (2005)  
Butland et al. (2005)  
Butland et al. (2005)

pull down  
pull down  
pull down

Butland et al. (2005)  
Butland et al. (2005)  
Arifuzzaman et al. (2006)

pull down

Arifuzzaman et al. (2006)

pull down  
pull down  
pull down  
pull down

Arifuzzaman et al. (2006)  
Arifuzzaman et al. (2006)  
Arifuzzaman et al. (2006)  
Arifuzzaman et al. (2006)

pull down  
pull down  
pull down

Arifuzzaman et al. (2006)  
Arifuzzaman et al. (2006)  
Arifuzzaman et al. (2006)

pull down

Arifuzzaman et al. (2006)

pull down  
pull down

Butland et al. (2005)  
Butland et al. (2005)

pull down

Arifuzzaman et al. (2006)

pull down  
pull down  
pull down  
pull down  
pull down  
pull down

Arifuzzaman et al. (2006)  
Arifuzzaman et al. (2006)

x-ray crystallography  
x-ray crystallography  
blue native page  
x-ray crystallography  
x-ray crystallography

Yankovskaya et al. (2003)  
Yankovskaya et al. (2003)  
Stenberg et al. (2005)  
Yankovskaya et al. (2003)  
Yankovskaya et al. (2003)





pull down  
pull down  
pull down  
pull down  
pull down  
pull down  
pull down

Butland et al. (2005)  
Butland et al. (2005)

pull down  
pull down  
pull down  
pull down  
pull down  
pull down  
pull down

Butland et al. (2005)  
Butland et al. (2005)

blue native page  
pull down  
pull down

Lasserre et al. (2006)  
Butland et al. (2005)  
Butland et al. (2005)

blue native page

Lasserre et al. (2006)

pull down  
pull down

Butland et al. (2005)  
Butland et al. (2005)  
Arifuzzaman et al. (2006)  
Butland et al. (2005)  
Butland et al. (2005)

anti tag coimmunoprecipitation

Regonesi et al. (2006)

blue native page

Lasserre et al. (2006)

pull down  
pull down  
pull down  
pull down

Butland et al. (2005)  
Butland et al. (2005)  
Butland et al. (2005)  
Butland et al. (2005)

comigration in non denaturing gel electrophoresis

Pan et al.

pull down  
pull down  
pull down  
pull down  
pull down  
pull down

Butland et al. (2005)  
Butland et al. (2005)

pull down  
pull down

Arifuzzaman et al. (2006)  
Arifuzzaman et al. (2006)

x-ray crystallography  
x-ray crystallography

Jeruzalmi et al. (2001)  
Jeruzalmi et al. (2001)

pull down  
pull down

Butland et al. (2005)  
Arifuzzaman et al. (2006)  
Butland et al. (2005)

pull down  
pull down

Butland et al. (2005)  
Arifuzzaman et al. (2006)  
Arifuzzaman et al. (2006)  
Butland et al. (2005)  
Arifuzzaman et al. (2006)  
Butland et al. (2005)  
Arifuzzaman et al. (2006)  
Arifuzzaman et al. (2006)  
Butland et al. (2005)  
Arifuzzaman et al. (2006)  
Butland et al. (2005)  
Butland et al. (2005)

x-ray crystallography

Vargason et al. (2000)

pull down

Butland et al. (2005)

pull down

Butland et al. (2005)

pull down

Butland et al. (2005)

blue native page

Lasserre et al. (2006)

comigration in non denaturing gel electrophoresis

Pan et al.

blue native page

Lasserre et al. (2006)

pull down

Butland et al. (2005)

comigration in non denaturing gel electrophoresis

Pan et al.

pull down

Butland et al. (2005)

pull down

Butland et al. (2005)

pull down

Arifuzzaman et al. (2006)

pull down

Arifuzzaman et al. (2006)

pull down

Butland et al. (2005)

pull down

Arifuzzaman et al. (2006)

pull down

Butland et al. (2005)

pull down

Arifuzzaman et al. (2006)

pull down

Butland et al. (2005)

pull down

Butland et al. (2005)

pull down

Butland et al. (2005)

pull down

Arifuzzaman et al. (2006)

pull down

Butland et al. (2005)

x-ray crystallography

Kawashima et al. (1996)

blue native page

Lasserre et al. (2006)

pull down

Butland et al. (2005)

pull down

Arifuzzaman et al. (2006)

pull down

Arifuzzaman et al. (2006)

pull down

Butland et al. (2005)

pull down  
pull down

Butland et al. (2005)  
Butland et al. (2005)

pull down  
pull down  
pull down  
pull down  
pull down

Arifuzzaman et al. (2006)  
Arifuzzaman et al. (2006)  
Arifuzzaman et al. (2006)  
Arifuzzaman et al. (2006)  
Arifuzzaman et al. (2006)

pull down  
pull down  
pull down  
pull down  
pull down  
pull down

Arifuzzaman et al. (2006)  
Arifuzzaman et al. (2006)

pull down  
pull down  
pull down  
pull down  
comigration in non denaturing gel electrophoresis  
pull down  
pull down

Arifuzzaman et al. (2006)  
Butland et al. (2005)  
Butland et al. (2005)  
Butland et al. (2005)  
Pan et al.  
Arifuzzaman et al. (2006)  
Arifuzzaman et al. (2006)  
Butland et al. (2005)  
Butland et al. (2005)  
Butland et al. (2005)  
Arifuzzaman et al. (2006)  
Arifuzzaman et al. (2006)  
Arifuzzaman et al. (2006)  
Arifuzzaman et al. (2006)  
Butland et al. (2005)

pull down  
footprinting  
mass spectrometry studies of complexes  
pull down  
pull down  
pull down  
pull down  
pull down  
pull down

pull down

pull down  
pull down  
pull down  
pull down  
pull down  
pull down

pull down  
pull down  
pull down  
pull down  
pull down  
pull down  
pull down  
pull down  
pull down  
pull down  
pull down  
pull down  
pull down  
pull down  
pull down  
pull down  
pull down  
pull down  
pull down  
pull down  
pull down  
pull down  
pull down

Butland et al. (2005)  
Callaghan et al. (2004)  
Callaghan et al. (2004)  
Butland et al. (2005)  
Butland et al. (2005)  
Arifuzzaman et al. (2006)  
Arifuzzaman et al. (2006)  
Butland et al. (2005)  
Arifuzzaman et al. (2006)

Arifuzzaman et al. (2006)

Arifuzzaman et al. (2006)  
Arifuzzaman et al. (2006)  
Arifuzzaman et al. (2006)  
Arifuzzaman et al. (2006)  
Arifuzzaman et al. (2006)  
Arifuzzaman et al. (2006)

Butland et al. (2005)  
Arifuzzaman et al. (2006)  
Butland et al. (2005)  
Arifuzzaman et al. (2006)  
Butland et al. (2005)  
Butland et al. (2005)  
Butland et al. (2005)  
Arifuzzaman et al. (2006)  
Arifuzzaman et al. (2006)  
Butland et al. (2005)  
Arifuzzaman et al. (2006)  
Butland et al. (2005)  
Butland et al. (2005)  
Arifuzzaman et al. (2006)



pull down  
pull down

Arifuzzaman et al. (2006)  
Arifuzzaman et al. (2006)

pull down  
pull down  
pull down  
pull down  
pull down  
pull down  
pull down

Arifuzzaman et al. (2006)  
Arifuzzaman et al. (2006)

pull down  
pull down

Arifuzzaman et al. (2006)  
Arifuzzaman et al. (2006)

pull down  
pull down  
pull down  
pull down  
pull down

Butland et al. (2005)  
Arifuzzaman et al. (2006)  
Butland et al. (2005)  
Butland et al. (2005)  
Arifuzzaman et al. (2006)

pull down  
pull down  
pull down  
pull down

Arifuzzaman et al. (2006)  
Arifuzzaman et al. (2006)  
Arifuzzaman et al. (2006)  
Arifuzzaman et al. (2006)

pull down  
pull down  
pull down

Arifuzzaman et al. (2006)  
Arifuzzaman et al. (2006)  
Arifuzzaman et al. (2006)

pull down  
pull down

Butland et al. (2005)  
Butland et al. (2005)

pull down  
pull down  
pull down  
pull down  
pull down

Butland et al. (2005)  
Butland et al. (2005)  
Arifuzzaman et al. (2006)  
Butland et al. (2005)  
Butland et al. (2005)



pull down  
pull down  
pull down  
pull down  
pull down

Butland et al. (2005)  
Butland et al. (2005)  
Butland et al. (2005)  
Butland et al. (2005)  
Arifuzzaman et al. (2006)

pull down  
pull down  
blue native page  
pull down  
pull down

Arifuzzaman et al. (2006)  
Arifuzzaman et al. (2006)  
Lasserre et al. (2006)  
Arifuzzaman et al. (2006)  
Arifuzzaman et al. (2006)

pull down  
pull down

Arifuzzaman et al. (2006)  
Arifuzzaman et al. (2006)

two hybrid array  
two hybrid array

Rajagopala et al. (2009)  
Rajagopala et al. (2009)

affinity chromatography technology  
affinity chromatography technology  
comigration in sds page  
x-ray crystallography  
affinity chromatography technology  
comigration in sds page  
x-ray crystallography  
x-ray crystallography  
x-ray crystallography  
x-ray crystallography  
affinity chromatography technology  
comigration in sds page  
x-ray crystallography

Remaut et al. (2008)  
Remaut et al. (2008)  
Remaut et al. (2008)  
Le et al. (2010)  
Remaut et al. (2008)  
Remaut et al. (2008)  
Le et al. (2010)  
Hung et al. (2002)  
Hung et al. (2002)  
Choudhury et al. (1999)  
Remaut et al. (2008)  
Remaut et al. (2008)  
Le et al. (2010)

pull down  
pull down

pull down  
pull down  
pull down  
pull down  
pull down  
pull down  
pull down  
pull down  
pull down  
pull down  
pull down  
pull down

pull down  
pull down  
pull down  
pull down

Butland et al. (2005)  
Butland et al. (2005)  
Butland et al. (2005)  
Butland et al. (2005)  
Arifuzzaman et al. (2006)  
Butland et al. (2005)  
Arifuzzaman et al. (2006)  
Arifuzzaman et al. (2006)  
Butland et al. (2005)  
Butland et al. (2005)  
Arifuzzaman et al. (2006)

Butland et al. (2005)  
Butland et al. (2005)  
Arifuzzaman et al. (2006)  
Arifuzzaman et al. (2006)  
Butland et al. (2005)  
Arifuzzaman et al. (2006)  
Butland et al. (2005)  
Arifuzzaman et al. (2006)  
Arifuzzaman et al. (2006)

Butland et al. (2005)  
Butland et al. (2005)  
Butland et al. (2005)  
Butland et al. (2005)

pull down  
pull down

Butland et al. (2005)  
Butland et al. (2005)  
Butland et al. (2005)  
Arifuzzaman et al. (2006)  
Arifuzzaman et al. (2006)  
Arifuzzaman et al. (2006)  
Arifuzzaman et al. (2006)  
Butland et al. (2005)  
Butland et al. (2005)  
Arifuzzaman et al. (2006)  
Butland et al. (2005)

pull down  
pull down  
two hybrid array  
pull down  
pull down  
pull down

Arifuzzaman et al. (2006)  
Arifuzzaman et al. (2006)  
Rajagopala et al. (2009)  
Arifuzzaman et al. (2006)  
Arifuzzaman et al. (2006)  
Arifuzzaman et al. (2006)

two hybrid array  
two hybrid array  
two hybrid array

Rajagopala et al. (2009)  
Rajagopala et al. (2009)  
Rajagopala et al. (2009)

two hybrid array  
two hybrid array

Rajagopala et al. (2009)  
Rajagopala et al. (2009)

pull down  
pull down  
pull down  
pull down

Arifuzzaman et al. (2006)  
Arifuzzaman et al. (2006)  
Arifuzzaman et al. (2006)  
Arifuzzaman et al. (2006)

|                                                   |                           |
|---------------------------------------------------|---------------------------|
| pull down                                         | Arifuzzaman et al. (2006) |
| pull down                                         | Arifuzzaman et al. (2006) |
| pull down                                         | Arifuzzaman et al. (2006) |
| pull down                                         | Arifuzzaman et al. (2006) |
| pull down                                         | Arifuzzaman et al. (2006) |
| pull down                                         | Arifuzzaman et al. (2006) |
| pull down                                         | Arifuzzaman et al. (2006) |
| pull down                                         | Arifuzzaman et al. (2006) |
| pull down                                         | Arifuzzaman et al. (2006) |
| pull down                                         | Arifuzzaman et al. (2006) |
| pull down                                         | Arifuzzaman et al. (2006) |
| pull down                                         | Arifuzzaman et al. (2006) |
| x-ray crystallography                             | Iverson et al. (2002)     |
| x-ray crystallography                             | Iverson et al. (2002)     |
| x-ray crystallography                             | Iverson et al. (2002)     |
| comigration in non denaturing gel electrophoresis | Huang et al. (2006)       |
| x-ray crystallography                             | Iverson et al. (2002)     |
| x-ray crystallography                             | Iverson et al. (2002)     |
| x-ray crystallography                             | Iverson et al. (2002)     |
| x-ray crystallography                             | Iverson et al. (2002)     |
| x-ray crystallography                             | Iverson et al. (2002)     |
| x-ray crystallography                             | Iverson et al. (2002)     |
| comigration in non denaturing gel electrophoresis | Huang et al. (2006)       |
| comigration in non denaturing gel electrophoresis | Huang et al. (2006)       |
| pull down                                         | Arifuzzaman et al. (2006) |
| comigration in non denaturing gel electrophoresis | Huang et al. (2006)       |
| comigration in non denaturing gel electrophoresis | Huang et al. (2006)       |
| pull down                                         | Butland et al. (2005)     |
| comigration in non denaturing gel electrophoresis | Huang et al. (2006)       |
| pull down                                         | Arifuzzaman et al. (2006) |
| blue native page                                  | Lasserre et al. (2006)    |
| pull down                                         | Arifuzzaman et al. (2006) |
| pull down                                         | Arifuzzaman et al. (2006) |
| pull down                                         | Arifuzzaman et al. (2006) |
| pull down                                         | Arifuzzaman et al. (2006) |
| pull down                                         | Arifuzzaman et al. (2006) |

|                                 |                           |
|---------------------------------|---------------------------|
| pull down                       | Arifuzzaman et al. (2006) |
| pull down                       | Arifuzzaman et al. (2006) |
| pull down                       | Butland et al. (2005)     |
| pull down                       | Arifuzzaman et al. (2006) |
| pull down                       | Arifuzzaman et al. (2006) |
| pull down                       | Arifuzzaman et al. (2006) |
| pull down                       | Arifuzzaman et al. (2006) |
| pull down                       | Arifuzzaman et al. (2006) |
| two hybrid                      | Karimova et al. (2005)    |
| two hybrid                      | Karimova et al. (2005)    |
| two hybrid                      | Karimova et al. (2005)    |
| two hybrid                      | Karimova et al. (2005)    |
| two hybrid                      | Karimova et al. (2005)    |
| two hybrid                      | Karimova et al. (2005)    |
| two hybrid                      | Karimova et al. (2005)    |
| two hybrid                      | Karimova et al. (2005)    |
| two hybrid                      | Karimova et al. (2005)    |
| two hybrid                      | Karimova et al. (2005)    |
| pull down                       | Butland et al. (2005)     |
| pull down                       | Butland et al. (2005)     |
| pull down                       | Butland et al. (2005)     |
| pull down                       | Butland et al. (2005)     |
| two hybrid                      | Karimova et al. (2005)    |
| anti bait coimmunoprecipitation | Corbin et al. (2007)      |
| pull down                       | Butland et al. (2005)     |
| pull down                       | Butland et al. (2005)     |
| pull down                       | Butland et al. (2005)     |
| pull down                       | Arifuzzaman et al. (2006) |
| pull down                       | Butland et al. (2005)     |
| pull down                       | Arifuzzaman et al. (2006) |
| pull down                       | Butland et al. (2005)     |
| pull down                       | Butland et al. (2005)     |
| pull down                       | Arifuzzaman et al. (2006) |
| pull down                       | Butland et al. (2005)     |
| pull down                       | Butland et al. (2005)     |
| pull down                       | Butland et al. (2005)     |
| pull down                       | Arifuzzaman et al. (2006) |
| pull down                       | Butland et al. (2005)     |
| pull down                       | Butland et al. (2005)     |

two hybrid  
pull down  
pull down  
pull down  
x-ray crystallography

Liu et al. (1999)  
Arifuzzaman et al. (2006)  
Arifuzzaman et al. (2006)  
Arifuzzaman et al. (2006)  
Mosyak et al. (2000)

pull down  
pull down  
pull down  
pull down

Butland et al. (2005)  
Butland et al. (2005)  
Butland et al. (2005)  
Butland et al. (2005)

pull down  
pull down

Arifuzzaman et al. (2006)  
Arifuzzaman et al. (2006)

pull down  
pull down

Arifuzzaman et al. (2006)  
Arifuzzaman et al. (2006)

pull down

Arifuzzaman et al. (2006)

pull down  
pull down  
pull down

Arifuzzaman et al. (2006)  
Arifuzzaman et al. (2006)  
Arifuzzaman et al. (2006)

pull down  
pull down

Butland et al. (2005)  
Arifuzzaman et al. (2006)

pull down  
pull down  
blue native page  
blue native page

Arifuzzaman et al. (2006)  
Arifuzzaman et al. (2006)  
Lasserre et al. (2006)  
Lasserre et al. (2006)

pull down  
pull down

Arifuzzaman et al. (2006)  
Arifuzzaman et al. (2006)



pull down  
pull down  
pull down

Arifuzzaman et al. (2006)  
Arifuzzaman et al. (2006)  
Arifuzzaman et al. (2006)

pull down  
pull down

Arifuzzaman et al. (2006)  
Arifuzzaman et al. (2006)

pull down  
pull down  
pull down

Arifuzzaman et al. (2006)  
Arifuzzaman et al. (2006)  
Arifuzzaman et al. (2006)

pull down  
pull down

Arifuzzaman et al. (2006)  
Arifuzzaman et al. (2006)

pull down  
pull down  
pull down  
pull down  
pull down  
pull down

Butland et al. (2005)  
Butland et al. (2005)

pull down

Arifuzzaman et al. (2006)

pull down  
comigration in non denaturing gel electrophoresis

Arifuzzaman et al. (2006)  
Pan et al.

pull down  
pull down

Arifuzzaman et al. (2006)  
Arifuzzaman et al. (2006)

pull down  
pull down  
pull down  
pull down  
pull down  
pull down

Arifuzzaman et al. (2006)  
Arifuzzaman et al. (2006)

pull down  
pull down  
pull down

Arifuzzaman et al. (2006)  
Arifuzzaman et al. (2006)  
Arifuzzaman et al. (2006)

pull down  
pull down  
pull down

Arifuzzaman et al. (2006)  
Arifuzzaman et al. (2006)  
Arifuzzaman et al. (2006)

pull down  
pull down  
pull down  
pull down  
pull down  
pull down  
pull down

Butland et al. (2005)  
Butland et al. (2005)

pull down  
pull down  
pull down

Arifuzzaman et al. (2006)  
Arifuzzaman et al. (2006)  
Arifuzzaman et al. (2006)

pull down  
pull down

Arifuzzaman et al. (2006)  
Arifuzzaman et al. (2006)

pull down  
two hybrid  
pull down  
pull down

Arifuzzaman et al. (2006)  
Burillo et al. (2004)  
Arifuzzaman et al. (2006)  
Arifuzzaman et al. (2006)

pull down

Arifuzzaman et al. (2006)

pull down  
pull down

Arifuzzaman et al. (2006)  
Arifuzzaman et al. (2006)

pull down  
pull down  
pull down  
pull down  
pull down  
pull down

Butland et al. (2005)  
Arifuzzaman et al. (2006)  
Arifuzzaman et al. (2006)

pull down  
pull down  
pull down  
pull down  
pull down

Arifuzzaman et al. (2006)  
Arifuzzaman et al. (2006)  
Arifuzzaman et al. (2006)  
Arifuzzaman et al. (2006)  
Arifuzzaman et al. (2006)

pull down  
pull down

Arifuzzaman et al. (2006)  
Arifuzzaman et al. (2006)

pull down  
pull down

Butland et al. (2005)  
Arifuzzaman et al. (2006)

pull down  
pull down  
pull down  
pull down

Arifuzzaman et al. (2006)  
Arifuzzaman et al. (2006)  
Arifuzzaman et al. (2006)  
Arifuzzaman et al. (2006)

pull down  
pull down  
pull down  
pull down  
pull down

Arifuzzaman et al. (2006)  
Arifuzzaman et al. (2006)  
Arifuzzaman et al. (2006)  
Arifuzzaman et al. (2006)  
Arifuzzaman et al. (2006)

pull down  
pull down  
pull down  
pull down  
pull down

Arifuzzaman et al. (2006)  
Arifuzzaman et al. (2006)  
Arifuzzaman et al. (2006)  
Arifuzzaman et al. (2006)  
Arifuzzaman et al. (2006)

pull down  
pull down  
pull down  
pull down  
pull down

Arifuzzaman et al. (2006)  
Arifuzzaman et al. (2006)  
Arifuzzaman et al. (2006)  
Arifuzzaman et al. (2006)  
Arifuzzaman et al. (2006)

comigration in non denaturing gel electrophoresis

pull down

pull down

blue native page

pull down

Pan et al.

Arifuzzaman et al. (2006)

Arifuzzaman et al. (2006)

Lasserre et al. (2006)

Arifuzzaman et al. (2006)

Butland et al. (2005)

Butland et al. (2005)

Butland et al. (2005)

Arifuzzaman et al. (2006)

Arifuzzaman et al. (2006)

Butland et al. (2005)

Arifuzzaman et al. (2006)

Butland et al. (2005)

Arifuzzaman et al. (2006)

Butland et al. (2005)

Butland et al. (2005)

Butland et al. (2005)

Butland et al. (2005)



|           |                           |
|-----------|---------------------------|
| pull down | Arifuzzaman et al. (2006) |
| pull down | Butland et al. (2005)     |
| pull down | Arifuzzaman et al. (2006) |
| pull down | Butland et al. (2005)     |
| pull down | Butland et al. (2005)     |
| pull down | Butland et al. (2005)     |
| pull down | Butland et al. (2005)     |
| pull down | Arifuzzaman et al. (2006) |
| pull down | Butland et al. (2005)     |
| pull down | Arifuzzaman et al. (2006) |
| pull down | Butland et al. (2005)     |
| pull down | Arifuzzaman et al. (2006) |
| pull down | Butland et al. (2005)     |
| pull down | Arifuzzaman et al. (2006) |
| pull down | Arifuzzaman et al. (2006) |
| pull down | Arifuzzaman et al. (2006) |

|           |                           |
|-----------|---------------------------|
| pull down | Arifuzzaman et al. (2006) |
| pull down | Arifuzzaman et al. (2006) |

|           |                           |
|-----------|---------------------------|
| pull down | Arifuzzaman et al. (2006) |
|-----------|---------------------------|

|           |                           |
|-----------|---------------------------|
| pull down | Arifuzzaman et al. (2006) |
|-----------|---------------------------|

|           |                           |
|-----------|---------------------------|
| pull down | Arifuzzaman et al. (2006) |
| pull down | Arifuzzaman et al. (2006) |

|                  |                           |
|------------------|---------------------------|
| pull down        | Arifuzzaman et al. (2006) |
| pull down        | Butland et al. (2005)     |
| two hybrid array | Rajagopala et al. (2009)  |
| pull down        | Butland et al. (2005)     |
| pull down        | Butland et al. (2005)     |
| pull down        | Butland et al. (2005)     |
| pull down        | Butland et al. (2005)     |
| pull down        | Butland et al. (2005)     |
| pull down        | Butland et al. (2005)     |
| two hybrid array | Rajagopala et al. (2009)  |
| two hybrid array | Rajagopala et al. (2009)  |
| pull down        | Butland et al. (2005)     |
| two hybrid array | Rajagopala et al. (2009)  |

pull down  
two hybrid array  
two hybrid array  
pull down  
pull down  
two hybrid array  
pull down  
pull down

Butland et al. (2005)  
Butland et al. (2005)  
Arifuzzaman et al. (2006)  
Butland et al. (2005)  
Butland et al. (2005)  
Butland et al. (2005)  
Arifuzzaman et al. (2006)  
Butland et al. (2005)  
Butland et al. (2005)  
Butland et al. (2005)  
Butland et al. (2005)  
Rajagopala et al. (2009)  
Rajagopala et al. (2009)  
Butland et al. (2005)  
Arifuzzaman et al. (2006)  
Rajagopala et al. (2009)  
Arifuzzaman et al. (2006)  
Butland et al. (2005)  
Butland et al. (2005)  
Arifuzzaman et al. (2006)  
Arifuzzaman et al. (2006)  
Butland et al. (2005)  
Butland et al. (2005)

pull down  
pull down  
pull down  
pull down  
pull down  
pull down  
comigration in non denaturing gel electrophoresis  
pull down  
pull down

Butland et al. (2005)  
Pan et al.  
Butland et al. (2005)  
Butland et al. (2005)

pull down

Arifuzzaman et al. (2006)









pull down  
pull down  
pull down  
pull down

Arifuzzaman et al. (2006)  
Butland et al. (2005)  
Arifuzzaman et al. (2006)  
Butland et al. (2005)

pull down  
pull down

Arifuzzaman et al. (2006)  
Arifuzzaman et al. (2006)

pull down  
pull down

Arifuzzaman et al. (2006)  
Arifuzzaman et al. (2006)

pull down  
pull down  
pull down

Arifuzzaman et al. (2006)  
Arifuzzaman et al. (2006)  
Arifuzzaman et al. (2006)

pull down  
pull down

Arifuzzaman et al. (2006)  
Butland et al. (2005)  
Butland et al. (2005)

pull down  
pull down  
pull down  
pull down  
pull down  
pull down

Butland et al. (2005)  
Butland et al. (2005)  
Arifuzzaman et al. (2006)  
Butland et al. (2005)  
Butland et al. (2005)  
Butland et al. (2005)  
Arifuzzaman et al. (2006)

pull down  
pull down

Butland et al. (2005)  
Arifuzzaman et al. (2006)  
Butland et al. (2005)  
Butland et al. (2005)  
Butland et al. (2005)  
Arifuzzaman et al. (2006)  
Arifuzzaman et al. (2006)  
Butland et al. (2005)  
Arifuzzaman et al. (2006)  
Butland et al. (2005)

pull down  
pull down

Butland et al. (2005)  
Butland et al. (2005)

pull down  
pull down  
pull down  
pull down  
pull down

Arifuzzaman et al. (2006)  
Arifuzzaman et al. (2006)  
Arifuzzaman et al. (2006)  
Arifuzzaman et al. (2006)  
Arifuzzaman et al. (2006)

pull down  
pull down

Arifuzzaman et al. (2006)  
Butland et al. (2005)  
Butland et al. (2005)  
Arifuzzaman et al. (2006)  
Butland et al. (2005)  
Butland et al. (2005)  
Arifuzzaman et al. (2006)  
Arifuzzaman et al. (2006)  
Arifuzzaman et al. (2006)  
Butland et al. (2005)  
Arifuzzaman et al. (2006)  
Arifuzzaman et al. (2006)  
Butland et al. (2005)  
Arifuzzaman et al. (2006)  
Arifuzzaman et al. (2006)  
Arifuzzaman et al. (2006)  
Arifuzzaman et al. (2006)  
Butland et al. (2005)  
Butland et al. (2005)  
Butland et al. (2005)  
Arifuzzaman et al. (2006)

pull down  
pull down

Butland et al. (2005)  
Butland et al. (2005)

pull down  
pull down

Arifuzzaman et al. (2006)  
Butland et al. (2005)  
Arifuzzaman et al. (2006)  
Arifuzzaman et al. (2006)  
Arifuzzaman et al. (2006)  
Butland et al. (2005)  
Butland et al. (2005)  
Butland et al. (2005)  
Arifuzzaman et al. (2006)  
Butland et al. (2005)  
Butland et al. (2005)

pull down  
pull down

pull down  
pull down  
pull down  
pull down  
pull down  
pull down  
pull down  
pull down  
pull down  
pull down  
pull down  
pull down  
pull down  
pull down  
pull down  
pull down  
pull down  
pull down  
two hybrid  
pull down  
x-ray crystallography  
x-ray crystallography  
x-ray crystallography  
x-ray crystallography  
two hybrid  
pull down  
pull down  
pull down  
pull down  
pull down  
pull down

Arifuzzaman et al. (2006)  
Butland et al. (2005)  
Arifuzzaman et al. (2006)  
Butland et al. (2005)  
Butland et al. (2005)  
Arifuzzaman et al. (2006)  
Butland et al. (2005)  
Butland et al. (2005)  
Butland et al. (2005)

Butland et al. (2005)  
Butland et al. (2005)  
Butland et al. (2005)  
Butland et al. (2005)  
Butland et al. (2005)  
Butland et al. (2005)  
Butland et al. (2005)  
Butland et al. (2005)  
Butland et al. (2005)  
Butland et al. (2005)  
Butland et al. (2005)  
Butland et al. (2005)  
Butland et al. (2005)  
Butland et al. (2005)  
Butland et al. (2005)  
Butland et al. (2005)  
Butland et al. (2005)  
Butland et al. (2005)  
Butland et al. (2005)  
Lee et al. (2003)  
Butland et al. (2005)  
Wang et al. (2001)  
Wang et al. (2001)  
Wang et al. (2001)  
Wang et al. (2001)  
Lee et al. (2003)  
Butland et al. (2005)  
Butland et al. (2005)





pull down  
pull down

Butland et al. (2005)  
Arifuzzaman et al. (2006)  
Arifuzzaman et al. (2006)  
Arifuzzaman et al. (2006)  
Butland et al. (2005)  
Butland et al. (2005)

pull down  
pull down

Arifuzzaman et al. (2006)  
Butland et al. (2005)  
Butland et al. (2005)

pull down  
pull down  
pull down  
pull down

Arifuzzaman et al. (2006)  
Arifuzzaman et al. (2006)  
Arifuzzaman et al. (2006)  
Arifuzzaman et al. (2006)

pull down  
pull down

Arifuzzaman et al. (2006)  
Arifuzzaman et al. (2006)

pull down  
pull down

Arifuzzaman et al. (2006)  
Arifuzzaman et al. (2006)

pull down  
pull down

Butland et al. (2005)  
Arifuzzaman et al. (2006)  
Butland et al. (2005)  
Butland et al. (2005)  
Butland et al. (2005)  
Butland et al. (2005)

pull down  
pull down  
pull down  
pull down

Arifuzzaman et al. (2006)  
Arifuzzaman et al. (2006)  
Arifuzzaman et al. (2006)  
Arifuzzaman et al. (2006)

pull down  
pull down  
pull down

Arifuzzaman et al. (2006)  
Arifuzzaman et al. (2006)  
Arifuzzaman et al. (2006)

pull down  
pull down

Arifuzzaman et al. (2006)  
Arifuzzaman et al. (2006)  
Arifuzzaman et al. (2006)  
Butland et al. (2005)  
Arifuzzaman et al. (2006)  
Arifuzzaman et al. (2006)  
Arifuzzaman et al. (2006)  
Butland et al. (2005)  
Butland et al. (2005)  
Arifuzzaman et al. (2006)  
Butland et al. (2005)  
Arifuzzaman et al. (2006)  
Arifuzzaman et al. (2006)  
Butland et al. (2005)  
Arifuzzaman et al. (2006)  
Arifuzzaman et al. (2006)  
Butland et al. (2005)  
Arifuzzaman et al. (2006)



pull down  
pull down

Butland et al. (2005)  
Butland et al. (2005)

x-ray crystallography  
x-ray crystallography

Graille et al. (2004)  
Yajima et al. (2004)

pull down  
pull down  
pull down  
pull down

Butland et al. (2005)  
Butland et al. (2005)  
Butland et al. (2005)  
Butland et al. (2005)

pull down  
pull down

Butland et al. (2005)  
Butland et al. (2005)  
Butland et al. (2005)  
Butland et al. (2005)  
Arifuzzaman et al. (2006)  
Arifuzzaman et al. (2006)  
Butland et al. (2005)  
Butland et al. (2005)  
Butland et al. (2005)  
Arifuzzaman et al. (2006)  
Butland et al. (2005)  
Butland et al. (2005)  
Arifuzzaman et al. (2006)  
Arifuzzaman et al. (2006)  
Arifuzzaman et al. (2006)  
Butland et al. (2005)  
Butland et al. (2005)



pull down  
pull down  
pull down  
pull down  
pull down  
pull down  
pull down

Arifuzzaman et al. (2006)  
Butland et al. (2005)  
Butland et al. (2005)  
Butland et al. (2005)  
Butland et al. (2005)  
Arifuzzaman et al. (2006)  
Arifuzzaman et al. (2006)

pull down  
pull down

Arifuzzaman et al. (2006)  
Arifuzzaman et al. (2006)

pull down  
pull down  
pull down  
pull down

Arifuzzaman et al. (2006)  
Arifuzzaman et al. (2006)  
Arifuzzaman et al. (2006)  
Arifuzzaman et al. (2006)

pull down  
pull down  
pull down  
pull down  
pull down

Arifuzzaman et al. (2006)  
Arifuzzaman et al. (2006)  
Arifuzzaman et al. (2006)  
Butland et al. (2005)  
Butland et al. (2005)

pull down  
pull down  
pull down  
pull down

Arifuzzaman et al. (2006)  
Arifuzzaman et al. (2006)  
Arifuzzaman et al. (2006)  
Arifuzzaman et al. (2006)

pull down  
pull down  
pull down  
pull down

Arifuzzaman et al. (2006)  
Arifuzzaman et al. (2006)  
Arifuzzaman et al. (2006)  
Arifuzzaman et al. (2006)

pull down  
pull down

Butland et al. (2005)  
Butland et al. (2005)  
Arifuzzaman et al. (2006)  
Butland et al. (2005)  
Butland et al. (2005)  
Butland et al. (2005)  
Arifuzzaman et al. (2006)  
Butland et al. (2005)

pull down  
pull down  
pull down  
pull down  
pull down  
pull down

Butland et al. (2005)  
Butland et al. (2005)

pull down  
pull down

Arifuzzaman et al. (2006)  
Arifuzzaman et al. (2006)

pull down  
pull down  
pull down  
pull down  
pull down

Arifuzzaman et al. (2006)  
Arifuzzaman et al. (2006)  
Arifuzzaman et al. (2006)  
Arifuzzaman et al. (2006)  
Arifuzzaman et al. (2006)

pull down  
pull down

Arifuzzaman et al. (2006)  
Arifuzzaman et al. (2006)

pull down  
blue native page

Arifuzzaman et al. (2006)  
Lasserre et al. (2006)

pull down  
pull down

Arifuzzaman et al. (2006)  
Arifuzzaman et al. (2006)

pull down

Butland et al. (2005)

pull down  
pull down

Arifuzzaman et al. (2006)  
Arifuzzaman et al. (2006)  
Butland et al. (2005)  
Arifuzzaman et al. (2006)  
Arifuzzaman et al. (2006)  
Arifuzzaman et al. (2006)  
Arifuzzaman et al. (2006)  
Butland et al. (2005)  
Arifuzzaman et al. (2006)  
Butland et al. (2005)  
Butland et al. (2005)  
Butland et al. (2005)

pull down  
pull down  
pull down

Arifuzzaman et al. (2006)  
Arifuzzaman et al. (2006)  
Arifuzzaman et al. (2006)

blue native page

Stenberg et al. (2005)

pull down  
pull down

Butland et al. (2005)  
Butland et al. (2005)

pull down  
pull down  
pull down  
pull down  
pull down  
pull down

Arifuzzaman et al. (2006)  
Arifuzzaman et al. (2006)



pull down  
pull down

Arifuzzaman et al. (2006)  
Butland et al. (2005)  
Arifuzzaman et al. (2006)  
Arifuzzaman et al. (2006)  
Arifuzzaman et al. (2006)  
Butland et al. (2005)  
Butland et al. (2005)  
Butland et al. (2005)  
Arifuzzaman et al. (2006)  
Butland et al. (2005)  
Butland et al. (2005)

pull down  
pull down

Arifuzzaman et al. (2006)  
Arifuzzaman et al. (2006)  
Butland et al. (2005)  
Butland et al. (2005)  
Arifuzzaman et al. (2006)  
Butland et al. (2005)  
Arifuzzaman et al. (2006)  
Arifuzzaman et al. (2006)  
Butland et al. (2005)  
Butland et al. (2005)

pull down  
blue native page

Watanabe et al. (2006)  
Stenberg et al. (2005)

pull down  
pull down  
pull down  
pull down  
pull down

Arifuzzaman et al. (2006)  
Butland et al. (2005)  
Butland et al. (2005)  
Arifuzzaman et al. (2006)  
Butland et al. (2005)





|           |                           |
|-----------|---------------------------|
| pull down | Arifuzzaman et al. (2006) |
| pull down | Butland et al. (2005)     |
| pull down | Butland et al. (2005)     |
| pull down | Arifuzzaman et al. (2006) |
| pull down | Butland et al. (2005)     |
| pull down | Butland et al. (2005)     |
| pull down | Butland et al. (2005)     |
| pull down | Butland et al. (2005)     |
| pull down | Butland et al. (2005)     |
| pull down | Arifuzzaman et al. (2006) |
| pull down | Butland et al. (2005)     |
| pull down | Butland et al. (2005)     |
| pull down | Butland et al. (2005)     |
| pull down | Butland et al. (2005)     |
| pull down | Arifuzzaman et al. (2006) |
| pull down | Butland et al. (2005)     |
| pull down | Arifuzzaman et al. (2006) |
| pull down | Butland et al. (2005)     |
| pull down | Butland et al. (2005)     |
| pull down | Butland et al. (2005)     |
| pull down | Butland et al. (2005)     |
| pull down | Butland et al. (2005)     |
| pull down | Butland et al. (2005)     |

|           |                           |
|-----------|---------------------------|
| pull down | Arifuzzaman et al. (2006) |
| pull down | Arifuzzaman et al. (2006) |

|           |                           |
|-----------|---------------------------|
| pull down | Arifuzzaman et al. (2006) |
|-----------|---------------------------|

|           |                           |
|-----------|---------------------------|
| pull down | Arifuzzaman et al. (2006) |
| pull down | Butland et al. (2005)     |
| pull down | Arifuzzaman et al. (2006) |

|           |                           |
|-----------|---------------------------|
| pull down | Arifuzzaman et al. (2006) |
|-----------|---------------------------|

|           |                           |
|-----------|---------------------------|
| pull down | Arifuzzaman et al. (2006) |
|-----------|---------------------------|

pull down  
pull down

Butland et al. (2005)  
Butland et al. (2005)

pull down  
pull down

Arifuzzaman et al. (2006)  
Butland et al. (2005)  
Arifuzzaman et al. (2006)  
Arifuzzaman et al. (2006)  
Butland et al. (2005)  
Butland et al. (2005)  
Arifuzzaman et al. (2006)  
Butland et al. (2005)  
Arifuzzaman et al. (2006)  
Arifuzzaman et al. (2006)

pull down

Arifuzzaman et al. (2006)

comigration in non denaturing gel electrophoresis

Pan et al.

pull down  
pull down

Arifuzzaman et al. (2006)  
Arifuzzaman et al. (2006)

|                                                   |                           |
|---------------------------------------------------|---------------------------|
| pull down                                         | Arifuzzaman et al. (2006) |
| pull down                                         | Arifuzzaman et al. (2006) |
| comigration in non denaturing gel electrophoresis | Pan et al.                |
| comigration in non denaturing gel electrophoresis | Pan et al.                |
| comigration in non denaturing gel electrophoresis | Pan et al.                |
| blue native page                                  | Stenberg et al. (2005)    |
| blue native page                                  | Stenberg et al. (2005)    |
| pull down                                         | Butland et al. (2005)     |
| pull down                                         | Butland et al. (2005)     |
| pull down                                         | Arifuzzaman et al. (2006) |
| pull down                                         | Arifuzzaman et al. (2006) |
| pull down                                         | Butland et al. (2005)     |
| pull down                                         | Arifuzzaman et al. (2006) |
| pull down                                         | Arifuzzaman et al. (2006) |
| pull down                                         | Arifuzzaman et al. (2006) |
| pull down                                         | Arifuzzaman et al. (2006) |
| pull down                                         | Arifuzzaman et al. (2006) |
| pull down                                         | Arifuzzaman et al. (2006) |
| pull down                                         | Arifuzzaman et al. (2006) |
| pull down                                         | Arifuzzaman et al. (2006) |
| pull down                                         | Butland et al. (2005)     |
| pull down                                         | Butland et al. (2005)     |
| pull down                                         | Butland et al. (2005)     |
| pull down                                         | Butland et al. (2005)     |
| pull down                                         | Butland et al. (2005)     |
| pull down                                         | Butland et al. (2005)     |
| pull down                                         | Arifuzzaman et al. (2006) |
| two hybrid array                                  | Rajagopala et al. (2009)  |
| two hybrid array                                  | Rajagopala et al. (2009)  |
| two hybrid array                                  | Rajagopala et al. (2009)  |
| two hybrid array                                  | Rajagopala et al. (2009)  |
| pull down                                         | Arifuzzaman et al. (2006) |
| pull down                                         | Butland et al. (2005)     |
| pull down                                         | Arifuzzaman et al. (2006) |
| pull down                                         | Arifuzzaman et al. (2006) |
| pull down                                         | Butland et al. (2005)     |
| pull down                                         | Butland et al. (2005)     |

pull down  
pull down  
pull down  
two hybrid array  
pull down

Butland et al. (2005)  
Arifuzzaman et al. (2006)  
Butland et al. (2005)  
Rajagopala et al. (2009)  
Arifuzzaman et al. (2006)

pull down

Arifuzzaman et al. (2006)

pull down  
pull down

Arifuzzaman et al. (2006)  
Butland et al. (2005)  
Arifuzzaman et al. (2006)  
Butland et al. (2005)

pull down  
pull down

Arifuzzaman et al. (2006)  
Arifuzzaman et al. (2006)  
Butland et al. (2005)  
Butland et al. (2005)  
Butland et al. (2005)  
Butland et al. (2005)  
Arifuzzaman et al. (2006)  
Arifuzzaman et al. (2006)  
Butland et al. (2005)  
Butland et al. (2005)  
Arifuzzaman et al. (2006)  
Arifuzzaman et al. (2006)

pull down  
pull down

Arifuzzaman et al. (2006)  
Arifuzzaman et al. (2006)

pull down  
pull down  
pull down

Arifuzzaman et al. (2006)  
Arifuzzaman et al. (2006)  
Arifuzzaman et al. (2006)

pull down  
pull down  
pull down

Arifuzzaman et al. (2006)  
Arifuzzaman et al. (2006)  
Arifuzzaman et al. (2006)

pull down  
pull down

Arifuzzaman et al. (2006)  
Arifuzzaman et al. (2006)

pull down  
pull down

Arifuzzaman et al. (2006)  
Arifuzzaman et al. (2006)

pull down  
pull down  
pull down  
pull down

Arifuzzaman et al. (2006)  
Arifuzzaman et al. (2006)  
Arifuzzaman et al. (2006)  
Arifuzzaman et al. (2006)

pull down  
pull down  
pull down  
pull down

Arifuzzaman et al. (2006)  
Arifuzzaman et al. (2006)  
Arifuzzaman et al. (2006)  
Arifuzzaman et al. (2006)

pull down  
pull down

Arifuzzaman et al. (2006)  
Arifuzzaman et al. (2006)

pull down  
pull down

Butland et al. (2005)  
Butland et al. (2005)  
Arifuzzaman et al. (2006)  
Arifuzzaman et al. (2006)  
Butland et al. (2005)  
Butland et al. (2005)  
Arifuzzaman et al. (2006)  
Arifuzzaman et al. (2006)  
Butland et al. (2005)  
Butland et al. (2005)  
Butland et al. (2005)  
Arifuzzaman et al. (2006)  
Arifuzzaman et al. (2006)

pull down  
pull down

Arifuzzaman et al. (2006)  
Arifuzzaman et al. (2006)









|                       |                           |
|-----------------------|---------------------------|
| pull down             | Arifuzzaman et al. (2006) |
| pull down             | Butland et al. (2005)     |
| pull down             | Butland et al. (2005)     |
| pull down             | Butland et al. (2005)     |
| pull down             | Butland et al. (2005)     |
| protein array         | Oishi et al. (2006)       |
| x-ray crystallography | Woo et al. (2009)         |
| pull down             | Arifuzzaman et al. (2006) |
| pull down             | Arifuzzaman et al. (2006) |
| pull down             | Arifuzzaman et al. (2006) |
| pull down             | Arifuzzaman et al. (2006) |

|           |                           |
|-----------|---------------------------|
| pull down | Butland et al. (2005)     |
| pull down | Butland et al. (2005)     |
| pull down | Butland et al. (2005)     |
| pull down | Arifuzzaman et al. (2006) |
| pull down | Arifuzzaman et al. (2006) |
| pull down | Arifuzzaman et al. (2006) |
| pull down | Butland et al. (2005)     |
| pull down | Butland et al. (2005)     |
| pull down | Butland et al. (2005)     |
| pull down | Butland et al. (2005)     |
| pull down | Butland et al. (2005)     |
| pull down | Butland et al. (2005)     |
| pull down | Butland et al. (2005)     |
| pull down | Butland et al. (2005)     |
| pull down | Butland et al. (2005)     |
| pull down | Butland et al. (2005)     |
| pull down | Butland et al. (2005)     |
| pull down | Butland et al. (2005)     |
| pull down | Butland et al. (2005)     |
| pull down | Butland et al. (2005)     |
| pull down | Butland et al. (2005)     |
| pull down | Butland et al. (2005)     |
| pull down | Butland et al. (2005)     |
| pull down | Arifuzzaman et al. (2006) |
| pull down | Arifuzzaman et al. (2006) |
| pull down | Butland et al. (2005)     |
| pull down | Butland et al. (2005)     |

|                                   |                           |
|-----------------------------------|---------------------------|
| pull down                         | Arifuzzaman et al. (2006) |
| pull down                         | Butland et al. (2005)     |
| pull down                         | Arifuzzaman et al. (2006) |
| pull down                         | Arifuzzaman et al. (2006) |
| adenylate cyclase complementation | Mansour et al. (2001)     |

|           |                           |
|-----------|---------------------------|
| pull down | Butland et al. (2005)     |
| pull down | Butland et al. (2005)     |
| pull down | Arifuzzaman et al. (2006) |

pull down  
pull down  
pull down  
pull down  
pull down

Arifuzzaman et al. (2006)  
Arifuzzaman et al. (2006)  
Arifuzzaman et al. (2006)  
Arifuzzaman et al. (2006)  
Arifuzzaman et al. (2006)

pull down  
pull down  
pull down

Arifuzzaman et al. (2006)  
Arifuzzaman et al. (2006)  
Arifuzzaman et al. (2006)

pull down  
pull down  
pull down  
pull down  
x-ray crystallography  
pull down  
pull down  
pull down  
pull down  
pull down

Butland et al. (2005)  
Butland et al. (2005)  
Butland et al. (2005)  
Butland et al. (2005)  
Banci et al. (2005)  
Banci et al. (2005)  
Banci et al. (2005)  
Banci et al. (2005)  
Bertero et al. (2003)  
Rothery et al. (2004)  
Banci et al. (2005)  
Banci et al. (2005)  
Banci et al. (2005)  
Banci et al. (2005)  
Bertero et al. (2003)  
Rothery et al. (2004)  
Butland et al. (2005)  
Butland et al. (2005)  
Butland et al. (2005)  
Butland et al. (2005)  
Arifuzzaman et al. (2006)

pull down  
pull down  
pull down  
blue native page  
pull down  
pull down  
blue native page  
pull down

Butland et al. (2005)  
Butland et al. (2005)  
Arifuzzaman et al. (2006)  
Lasserre et al. (2006)  
Butland et al. (2005)  
Butland et al. (2005)  
Lasserre et al. (2006)  
Arifuzzaman et al. (2006)



pull down

Arifuzzaman et al. (2006)

two hybrid

Salinas et al. (2003)

pull down

Arifuzzaman et al. (2006)

pull down

Butland et al. (2005)

pull down

Butland et al. (2005)

pull down

Arifuzzaman et al. (2006)

pull down

Butland et al. (2005)

pull down

Arifuzzaman et al. (2006)

blue native page

Lasserre et al. (2006)

blue native page

Stenberg et al. (2005)

pull down

Arifuzzaman et al. (2006)

pull down

Butland et al. (2005)

pull down

Arifuzzaman et al. (2006)

pull down

Butland et al. (2005)

pull down

Butland et al. (2005)

pull down

Arifuzzaman et al. (2006)





pull down  
pull down

Arifuzzaman et al. (2006)  
Arifuzzaman et al. (2006)  
Butland et al. (2005)  
Butland et al. (2005)  
Butland et al. (2005)  
Arifuzzaman et al. (2006)  
Butland et al. (2005)  
Butland et al. (2005)  
Butland et al. (2005)  
Arifuzzaman et al. (2006)  
Arifuzzaman et al. (2006)  
Arifuzzaman et al. (2006)

pull down  
pull down  
pull down  
pull down  
pull down

Butland et al. (2005)  
Butland et al. (2005)  
Butland et al. (2005)  
Butland et al. (2005)  
Arifuzzaman et al. (2006)

pull down  
pull down

Butland et al. (2005)  
Butland et al. (2005)  
Arifuzzaman et al. (2006)  
Butland et al. (2005)  
Arifuzzaman et al. (2006)  
Arifuzzaman et al. (2006)

pull down  
pull down  
pull down  
pull down

Butland et al. (2005)  
Arifuzzaman et al. (2006)  
Arifuzzaman et al. (2006)  
Arifuzzaman et al. (2006)

blue native page  
pull down

Stenberg et al. (2005)  
Martinez-Hackert et al. (2009)

pull down  
pull down

Arifuzzaman et al. (2006)  
Cai et al. (1990)

pull down  
pull down

Arifuzzaman et al. (2006)  
Arifuzzaman et al. (2006)

pull down  
pull down

Arifuzzaman et al. (2006)  
Arifuzzaman et al. (2006)

pull down  
pull down  
pull down  
pull down

Arifuzzaman et al. (2006)  
Arifuzzaman et al. (2006)  
Arifuzzaman et al. (2006)  
Arifuzzaman et al. (2006)

pull down  
pull down

Arifuzzaman et al. (2006)  
Arifuzzaman et al. (2006)

pull down  
pull down

Arifuzzaman et al. (2006)  
Arifuzzaman et al. (2006)

pull down  
pull down

Arifuzzaman et al. (2006)  
Arifuzzaman et al. (2006)  
Butland et al. (2005)  
Butland et al. (2005)  
Butland et al. (2005)  
Arifuzzaman et al. (2006)  
Butland et al. (2005)  
Butland et al. (2005)

pull down  
pull down

Butland et al. (2005)  
Butland et al. (2005)

pull down  
pull down

Butland et al. (2005)  
Butland et al. (2005)  
Butland et al. (2005)  
Arifuzzaman et al. (2006)  
Butland et al. (2005)  
Arifuzzaman et al. (2006)  
Butland et al. (2005)  
Arifuzzaman et al. (2006)  
Butland et al. (2005)  
Arifuzzaman et al. (2006)

pull down  
pull down  
surface plasmon resonance  
adenylate cyclase complementation  
cross-linking study  
pull down  
pull down  
pull down

Muller et al. (2007)  
Muller et al. (2007)

pull down  
pull down  
pull down

Arifuzzaman et al. (2006)  
Arifuzzaman et al. (2006)  
Arifuzzaman et al. (2006)

pull down  
pull down  
pull down  
pull down  
pull down  
pull down

Arifuzzaman et al. (2006)  
Arifuzzaman et al. (2006)

pull down  
pull down

Arifuzzaman et al. (2006)  
Arifuzzaman et al. (2006)

pull down  
pull down

Arifuzzaman et al. (2006)  
Arifuzzaman et al. (2006)

pull down  
pull down  
pull down

Butland et al. (2005)  
Arifuzzaman et al. (2006)  
Butland et al. (2005)

pull down  
pull down  
pull down  
pull down  
pull down  
comigration in non denaturing gel electrophoresis  
pull down

Butland et al. (2005)  
Butland et al. (2005)  
Butland et al. (2005)  
Arifuzzaman et al. (2006)  
Butland et al. (2005)  
Pan et al.  
Arifuzzaman et al. (2006)

pull down  
pull down

Arifuzzaman et al. (2006)  
Arifuzzaman et al. (2006)

pull down  
pull down

Butland et al. (2005)  
Butland et al. (2005)  
Butland et al. (2005)  
Arifuzzaman et al. (2006)  
Arifuzzaman et al. (2006)  
Arifuzzaman et al. (2006)  
Butland et al. (2005)  
Butland et al. (2005)  
Butland et al. (2005)  
Arifuzzaman et al. (2006)  
Butland et al. (2005)  
Arifuzzaman et al. (2006)  
Arifuzzaman et al. (2006)  
Butland et al. (2005)  
Butland et al. (2005)  
Arifuzzaman et al. (2006)  
Butland et al. (2005)

pull down  
pull down

Arifuzzaman et al. (2006)  
Arifuzzaman et al. (2006)

pull down  
pull down  
pull down  
pull down  
pull down

Arifuzzaman et al. (2006)  
Arifuzzaman et al. (2006)  
Butland et al. (2005)  
Butland et al. (2005)  
Butland et al. (2005)  
Butland et al. (2005)





pull down  
pull down

Butland et al. (2005)  
Butland et al. (2005)

pull down  
pull down  
pull down  
pull down

Arifuzzaman et al. (2006)  
Arifuzzaman et al. (2006)  
Arifuzzaman et al. (2006)  
Arifuzzaman et al. (2006)

pull down  
pull down

Butland et al. (2005)  
Butland et al. (2005)

pull down  
pull down

Arifuzzaman et al. (2006)  
Arifuzzaman et al. (2006)

pull down  
pull down  
pull down  
pull down  
pull down

Arifuzzaman et al. (2006)  
Arifuzzaman et al. (2006)  
Arifuzzaman et al. (2006)  
Arifuzzaman et al. (2006)  
Arifuzzaman et al. (2006)

pull down  
pull down

Arifuzzaman et al. (2006)  
Arifuzzaman et al. (2006)

pull down  
pull down

Butland et al. (2005)  
Butland et al. (2005)







pull down

Arifuzzaman et al. (2006)

pull down

Arifuzzaman et al. (2006)

pull down

Arifuzzaman et al. (2006)

pull down

Butland et al. (2005)

pull down

Butland et al. (2005)

pull down

Arifuzzaman et al. (2006)

pull down

Butland et al. (2005)

pull down

Arifuzzaman et al. (2006)

pull down

Butland et al. (2005)

pull down

Arifuzzaman et al. (2006)

pull down

Butland et al. (2005)

pull down

Butland et al. (2005)

pull down

Butland et al. (2005)

pull down

Arifuzzaman et al. (2006)

pull down

Butland et al. (2005)

pull down

Butland et al. (2005)

pull down

Butland et al. (2005)

blue native page

Lasserre et al. (2006)

pull down

Arifuzzaman et al. (2006)

pull down  
pull down  
pull down  
pull down  
pull down  
pull down

Arifuzzaman et al. (2006)  
Arifuzzaman et al. (2006)

nuclear magnetic resonance  
nuclear magnetic resonance

Cai et al. (2003)  
Wang et al. (2000)

pull down  
pull down  
pull down

Arifuzzaman et al. (2006)  
Arifuzzaman et al. (2006)  
Arifuzzaman et al. (2006)

nuclear magnetic resonance

Garrett et al. (1997)

pull down  
pull down  
pull down

Butland et al. (2005)  
Butland et al. (2005)  
Butland et al. (2005)

pull down  
pull down  
blue native page  
blue native page  
pull down  
pull down  
pull down  
pull down

Arifuzzaman et al. (2006)  
Arifuzzaman et al. (2006)  
Lasserre et al. (2006)  
Lasserre et al. (2006)  
Arifuzzaman et al. (2006)  
Butland et al. (2005)  
Butland et al. (2005)  
Arifuzzaman et al. (2006)

pull down

Arifuzzaman et al. (2006)

pull down  
pull down  
pull down  
pull down  
pull down  
pull down

Butland et al. (2005)  
Butland et al. (2005)

pull down  
pull down  
pull down

Butland et al. (2005)  
Butland et al. (2005)  
Butland et al. (2005)

pull down

Arifuzzaman et al. (2006)

pull down  
pull down  
pull down  
pull down  
pull down  
pull down  
pull down

Arifuzzaman et al. (2006)  
Arifuzzaman et al. (2006)

pull down  
pull down  
pull down  
pull down  
pull down  
pull down

Arifuzzaman et al. (2006)  
Arifuzzaman et al. (2006)

pull down  
pull down

Butland et al. (2005)  
Arifuzzaman et al. (2006)

pull down  
pull down

Butland et al. (2005)  
Arifuzzaman et al. (2006)  
Butland et al. (2005)  
Arifuzzaman et al. (2006)  
Butland et al. (2005)  
Butland et al. (2005)  
Arifuzzaman et al. (2006)  
Butland et al. (2005)  
Arifuzzaman et al. (2006)  
Arifuzzaman et al. (2006)  
Butland et al. (2005)  
Arifuzzaman et al. (2006)  
Butland et al. (2005)  
Butland et al. (2005)  
Arifuzzaman et al. (2006)  
Butland et al. (2005)



pull down  
pull down

Butland et al. (2005)  
Arifuzzaman et al. (2006)  
Butland et al. (2005)  
Butland et al. (2005)

pull down  
pull down  
pull down

Arifuzzaman et al. (2006)  
Arifuzzaman et al. (2006)  
Arifuzzaman et al. (2006)

pull down

Arifuzzaman et al. (2006)

pull down  
pull down  
pull down  
pull down  
pull down

Arifuzzaman et al. (2006)  
Arifuzzaman et al. (2006)  
Arifuzzaman et al. (2006)  
Arifuzzaman et al. (2006)  
Arifuzzaman et al. (2006)

pull down  
pull down

Arifuzzaman et al. (2006)  
Arifuzzaman et al. (2006)

pull down

Butland et al. (2005)

pull down  
pull down

Butland et al. (2005)  
Butland et al. (2005)

pull down  
pull down  
pull down

Butland et al. (2005)  
Butland et al. (2005)  
Butland et al. (2005)

pull down

Arifuzzaman et al. (2006)

pull down  
pull down

Arifuzzaman et al. (2006)  
Arifuzzaman et al. (2006)

pull down  
pull down  
pull down  
pull down  
pull down  
pull down

Arifuzzaman et al. (2006)  
Arifuzzaman et al. (2006)

pull down  
pull down  
pull down  
pull down  
pull down

Arifuzzaman et al. (2006)  
Arifuzzaman et al. (2006)  
Arifuzzaman et al. (2006)  
Arifuzzaman et al. (2006)  
Arifuzzaman et al. (2006)

pull down

Arifuzzaman et al. (2006)







pull down  
pull down

Arifuzzaman et al. (2006)  
Arifuzzaman et al. (2006)

pull down  
pull down  
pull down

Butland et al. (2005)  
Butland et al. (2005)  
Butland et al. (2005)

pull down  
pull down  
pull down

Arifuzzaman et al. (2006)  
Arifuzzaman et al. (2006)  
Arifuzzaman et al. (2006)

pull down  
pull down

Arifuzzaman et al. (2006)  
Arifuzzaman et al. (2006)

pull down  
pull down  
pull down  
pull down  
pull down  
pull down

Arifuzzaman et al. (2006)  
Arifuzzaman et al. (2006)

pull down  
pull down

Arifuzzaman et al. (2006)  
Arifuzzaman et al. (2006)

pull down  
pull down

Arifuzzaman et al. (2006)  
Arifuzzaman et al. (2006)

pull down  
pull down  
pull down  
pull down

Arifuzzaman et al. (2006)  
Arifuzzaman et al. (2006)  
Arifuzzaman et al. (2006)  
Arifuzzaman et al. (2006)

pull down  
pull down  
pull down

Arifuzzaman et al. (2006)  
Arifuzzaman et al. (2006)  
Arifuzzaman et al. (2006)

pull down

Arifuzzaman et al. (2006)

pull down

Arifuzzaman et al. (2006)

pull down  
pull down  
pull down  
pull down

Arifuzzaman et al. (2006)  
Arifuzzaman et al. (2006)  
Arifuzzaman et al. (2006)  
Arifuzzaman et al. (2006)

pull down  
pull down  
pull down

Arifuzzaman et al. (2006)  
Arifuzzaman et al. (2006)  
Arifuzzaman et al. (2006)

pull down

Butland et al. (2005)

pull down

Arifuzzaman et al. (2006)

pull down

Arifuzzaman et al. (2006)

pull down  
pull down  
pull down  
pull down

Arifuzzaman et al. (2006)  
Arifuzzaman et al. (2006)  
Arifuzzaman et al. (2006)  
Arifuzzaman et al. (2006)

pull down  
pull down  
pull down  
pull down  
pull down  
pull down  
pull down

Arifuzzaman et al. (2006)  
Arifuzzaman et al. (2006)

pull down  
pull down  
pull down  
pull down

Arifuzzaman et al. (2006)  
Arifuzzaman et al. (2006)  
Arifuzzaman et al. (2006)  
Arifuzzaman et al. (2006)



















pull down  
pull down  
pull down  
pull down

Butland et al. (2005)  
Arifuzzaman et al. (2006)  
Arifuzzaman et al. (2006)  
Arifuzzaman et al. (2006)

pull down  
pull down  
pull down  
pull down  
pull down  
pull down  
pull down

Arifuzzaman et al. (2006)  
Arifuzzaman et al. (2006)  
Arifuzzaman et al. (2006)  
Arifuzzaman et al. (2006)  
Butland et al. (2005)  
Arifuzzaman et al. (2006)  
Arifuzzaman et al. (2006)

pull down

Arifuzzaman et al. (2006)

pull down  
affinity chromatography technology  
pull down  
affinity chromatography technology  
affinity chromatography technology  
affinity chromatography technology  
affinity chromatography technology  
pull down  
anti tag coimmunoprecipitation  
affinity chromatography technology  
affinity chromatography technology  
pull down  
pull down  
affinity chromatography technology  
pull down  
affinity chromatography technology  
affinity chromatography technology  
molecular sieving  
pull down  
pull down  
pull down  
affinity chromatography technology  
affinity chromatography technology

Butland et al. (2005)  
Regonesi et al. (2006)  
Butland et al. (2005)  
Regonesi et al. (2006)  
Regonesi et al. (2006)  
Regonesi et al. (2006)  
Regonesi et al. (2006)  
Butland et al. (2005)  
Regonesi et al. (2006)  
Regonesi et al. (2006)  
Regonesi et al. (2006)  
Butland et al. (2005)  
Butland et al. (2005)  
Regonesi et al. (2006)  
Butland et al. (2005)  
Regonesi et al. (2006)  
Regonesi et al. (2006)  
Callaghan et al. (2004)  
Butland et al. (2005)  
Butland et al. (2005)  
Butland et al. (2005)  
Regonesi et al. (2006)  
Regonesi et al. (2006)

affinity chromatography technology  
pull down  
affinity chromatography technology  
affinity chromatography technology  
affinity chromatography technology  
affinity chromatography technology  
pull down  
affinity chromatography technology  
pull down  
anti tag coimmunoprecipitation  
affinity chromatography technology  
affinity chromatography technology  
pull down  
anti tag coimmunoprecipitation  
affinity chromatography technology  
affinity chromatography technology  
pull down  
affinity chromatography technology  
pull down  
pull down  
pull down  
affinity chromatography technology  
affinity chromatography technology  
pull down  
affinity chromatography technology  
affinity chromatography technology  
pull down

Regonesi et al. (2006)  
Butland et al. (2005)  
Regonesi et al. (2006)  
Butland et al. (2005)  
Regonesi et al. (2006)  
Butland et al. (2005)  
Regonesi et al. (2006)  
Butland et al. (2005)  
Butland et al. (2005)  
Butland et al. (2005)  
Regonesi et al. (2006)  
Regonesi et al. (2006)  
Butland et al. (2005)  
Regonesi et al. (2006)  
Regonesi et al. (2006)  
Butland et al. (2005)



























pull down  
pull down

Arifuzzaman et al. (2006)  
Arifuzzaman et al. (2006)

pull down  
pull down  
pull down

Mason et al. (1992)  
Mason et al. (1992)  
Mason et al. (1992)

pull down  
pull down  
pull down  
pull down  
pull down

Arifuzzaman et al. (2006)  
Arifuzzaman et al. (2006)  
Arifuzzaman et al. (2006)  
Arifuzzaman et al. (2006)  
Arifuzzaman et al. (2006)

pull down

Arifuzzaman et al. (2006)

pull down  
pull down  
pull down  
pull down

Arifuzzaman et al. (2006)  
Arifuzzaman et al. (2006)  
Arifuzzaman et al. (2006)  
Arifuzzaman et al. (2006)

pull down  
pull down  
pull down  
pull down  
pull down  
pull down

Arifuzzaman et al. (2006)  
Arifuzzaman et al. (2006)

pull down  
pull down  
pull down  
pull down

Arifuzzaman et al. (2006)  
Arifuzzaman et al. (2006)  
Arifuzzaman et al. (2006)  
Arifuzzaman et al. (2006)

pull down  
pull down

Arifuzzaman et al. (2006)  
Arifuzzaman et al. (2006)

two hybrid array  
two hybrid array  
two hybrid array

Rajagopala et al. (2009)  
Rajagopala et al. (2009)  
Rajagopala et al. (2009)

pull down  
pull down

Arifuzzaman et al. (2006)  
Arifuzzaman et al. (2006)

pull down

Butland et al. (2005)

pull down

Butland et al. (2005)

pull down

Arifuzzaman et al. (2006)

pull down

Martinez-Hackert et al. (2009)

pull down

Arifuzzaman et al. (2006)

pull down  
pull down

Arifuzzaman et al. (2006)  
Arifuzzaman et al. (2006)

pull down  
pull down

Arifuzzaman et al. (2006)  
Arifuzzaman et al. (2006)

pull down  
pull down

Arifuzzaman et al. (2006)  
Arifuzzaman et al. (2006)

pull down  
pull down  
pull down  
pull down  
pull down

Butland et al. (2005)  
Butland et al. (2005)  
Arifuzzaman et al. (2006)  
Arifuzzaman et al. (2006)  
Arifuzzaman et al. (2006)

pull down  
pull down  
pull down  
pull down

Arifuzzaman et al. (2006)  
Arifuzzaman et al. (2006)  
Arifuzzaman et al. (2006)  
Arifuzzaman et al. (2006)

pull down  
pull down  
pull down

Arifuzzaman et al. (2006)  
Butland et al. (2005)  
Butland et al. (2005)

pull down

Butland et al. (2005)

pull down

Butland et al. (2005)

pull down

Arifuzzaman et al. (2006)

pull down

Butland et al. (2005)

pull down

Arifuzzaman et al. (2006)

pull down  
pull down  
pull down

Arifuzzaman et al. (2006)  
Arifuzzaman et al. (2006)  
Arifuzzaman et al. (2006)

pull down

Arifuzzaman et al. (2006)

pull down  
blue native page  
pull down  
pull down  
far western blotting  
pull down  
pull down  
blue native page  
blue native page

Butland et al. (2005)  
Stenberg et al. (2005)  
Butland et al. (2005)  
Butland et al. (2005)  
Snyders et al. (1997)  
Butland et al. (2005)  
Butland et al. (2005)  
Lasserre et al. (2006)  
Lasserre et al. (2006)

pull down  
pull down

Butland et al. (2005)  
Butland et al. (2005)  
Butland et al. (2005)  
Arifuzzaman et al. (2006)  
Arifuzzaman et al. (2006)  
Butland et al. (2005)  
Arifuzzaman et al. (2006)  
Butland et al. (2005)  
Arifuzzaman et al. (2006)



pull down  
pull down  
pull down  
pull down

Arifuzzaman et al. (2006)  
Arifuzzaman et al. (2006)  
Arifuzzaman et al. (2006)  
Arifuzzaman et al. (2006)

pull down

Arifuzzaman et al. (2006)

pull down

Arifuzzaman et al. (2006)

pull down  
pull down

Arifuzzaman et al. (2006)  
Arifuzzaman et al. (2006)

pull down  
pull down

Butland et al. (2005)  
Butland et al. (2005)

blue native page

Stenberg et al. (2005)

pull down  
pull down  
pull down  
pull down  
pull down  
pull down  
pull down

Arifuzzaman et al. (2006)  
Butland et al. (2005)  
Butland et al. (2005)  
Arifuzzaman et al. (2006)  
Butland et al. (2005)  
Butland et al. (2005)  
Butland et al. (2006)







pull down  
pull down

Butland et al. (2005)  
Butland et al. (2005)

pull down  
pull down

Arifuzzaman et al. (2006)  
Butland et al. (2005)  
Butland et al. (2005)  
Butland et al. (2005)  
Butland et al. (2005)  
Arifuzzaman et al. (2006)  
Butland et al. (2005)  
Arifuzzaman et al. (2006)

pull down  
pull down  
pull down  
pull down

Butland et al. (2005)  
Butland et al. (2005)  
Butland et al. (2005)  
Butland et al. (2005)

pull down  
pull down

Arifuzzaman et al. (2006)  
Arifuzzaman et al. (2006)

pull down  
pull down  
pull down

Butland et al. (2005)  
Butland et al. (2005)  
Butland et al. (2005)





pull down  
pull down

Butland et al. (2005)  
Arifuzzaman et al. (2006)  
Arifuzzaman et al. (2006)  
Butland et al. (2005)  
Butland et al. (2005)  
Butland et al. (2005)  
Butland et al. (2005)  
Butland et al. (2005)

pull down  
pull down  
pull down  
pull down  
pull down  
pull down  
pull down

Arifuzzaman et al. (2006)  
Butland et al. (2005)  
Butland et al. (2005)  
Butland et al. (2005)  
Arifuzzaman et al. (2006)  
Butland et al. (2005)  
Arifuzzaman et al. (2006)

pull down  
pull down

Arifuzzaman et al. (2006)  
Arifuzzaman et al. (2006)

pull down  
pull down

Arifuzzaman et al. (2006)  
Butland et al. (2005)  
Arifuzzaman et al. (2006)  
Butland et al. (2005)

pull down  
pull down  
pull down  
pull down  
pull down  
pull down

Arifuzzaman et al. (2006)  
Butland et al. (2005)

pull down  
pull down

Butland et al. (2005)  
Butland et al. (2005)  
Arifuzzaman et al. (2006)  
Butland et al. (2005)  
Butland et al. (2005)  
Butland et al. (2005)  
Butland et al. (2005)  
Butland et al. (2005)

pull down  
pull down

Butland et al. (2005)  
Butland et al. (2005)  
Butland et al. (2005)  
Arifuzzaman et al. (2006)  
Butland et al. (2005)  
Butland et al. (2005)

pull down  
pull down  
pull down

Arifuzzaman et al. (2006)  
Arifuzzaman et al. (2006)  
Arifuzzaman et al. (2006)

pull down  
pull down

Butland et al. (2005)  
Arifuzzaman et al. (2006)  
Butland et al. (2005)  
Arifuzzaman et al. (2006)  
Butland et al. (2005)  
Butland et al. (2005)  
Butland et al. (2005)  
Arifuzzaman et al. (2006)  
Butland et al. (2005)

pull down  
pull down

Butland et al. (2005)  
Butland et al. (2005)  
Butland et al. (2005)  
Arifuzzaman et al. (2006)  
Butland et al. (2005)  
Arifuzzaman et al. (2006)  
Arifuzzaman et al. (2006)  
Butland et al. (2005)  
Butland et al. (2005)  
Butland et al. (2005)  
Arifuzzaman et al. (2006)  
Butland et al. (2005)







pull down  
pull down

Butland et al. (2005)  
Arifuzzaman et al. (2006)  
Butland et al. (2005)  
Butland et al. (2005)  
Butland et al. (2005)  
Butland et al. (2005)  
Arifuzzaman et al. (2006)  
Butland et al. (2005)  
Butland et al. (2005)

pull down

Arifuzzaman et al. (2006)

pull down  
pull down

Arifuzzaman et al. (2006)  
Butland et al. (2005)  
Butland et al. (2005)  
Arifuzzaman et al. (2006)  
Butland et al. (2005)  
Arifuzzaman et al. (2006)  
Butland et al. (2005)  
Arifuzzaman et al. (2006)

pull down  
pull down

Arifuzzaman et al. (2006)  
Arifuzzaman et al. (2006)  
Butland et al. (2005)  
Butland et al. (2005)  
Arifuzzaman et al. (2006)  
Butland et al. (2005)  
Butland et al. (2005)  
Butland et al. (2005)

pull down  
pull down

Arifuzzaman et al. (2006)  
Arifuzzaman et al. (2006)

comigration in non denaturing gel electrophoresis

Pan et al.



pull down  
pull down

Butland et al. (2005)  
Butland et al. (2005)

pull down  
pull down

Arifuzzaman et al. (2006)  
Arifuzzaman et al. (2006)

pull down  
pull down  
pull down

Arifuzzaman et al. (2006)  
Arifuzzaman et al. (2006)  
Arifuzzaman et al. (2006)

pull down  
pull down  
pull down  
pull down  
pull down

Arifuzzaman et al. (2006)  
Arifuzzaman et al. (2006)  
Arifuzzaman et al. (2006)  
Arifuzzaman et al. (2006)  
Arifuzzaman et al. (2006)

pull down  
pull down

Arifuzzaman et al. (2006)  
Arifuzzaman et al. (2006)

tandem affinity purification  
tandem affinity purification

Kumar et al. (2004)  
Kumar et al. (2004)









|                                                   |                                |
|---------------------------------------------------|--------------------------------|
| pull down                                         | Martinez-Hackert et al. (2009) |
| pull down                                         | Butland et al. (2005)          |
| pull down                                         | Martinez-Hackert et al. (2009) |
| pull down                                         | Martinez-Hackert et al. (2009) |
| pull down                                         | Arifuzzaman et al. (2006)      |
| pull down                                         | Martinez-Hackert et al. (2009) |
| pull down                                         | Martinez-Hackert et al. (2009) |
| pull down                                         | Martinez-Hackert et al. (2009) |
| pull down                                         | Arifuzzaman et al. (2006)      |
| pull down                                         | Arifuzzaman et al. (2006)      |
| pull down                                         | Butland et al. (2005)          |
| pull down                                         | Martinez-Hackert et al. (2009) |
| pull down                                         | Martinez-Hackert et al. (2009) |
| pull down                                         | Martinez-Hackert et al. (2009) |
| pull down                                         | Martinez-Hackert et al. (2009) |
| pull down                                         | Martinez-Hackert et al. (2009) |
| pull down                                         | Butland et al. (2005)          |
| pull down                                         | Martinez-Hackert et al. (2009) |
| pull down                                         | Arifuzzaman et al. (2006)      |
| pull down                                         | Martinez-Hackert et al. (2009) |
| pull down                                         | Arifuzzaman et al. (2006)      |
| pull down                                         | Martinez-Hackert et al. (2009) |
| pull down                                         | Arifuzzaman et al. (2006)      |
| pull down                                         | Butland et al. (2005)          |
| pull down                                         | Arifuzzaman et al. (2006)      |
| pull down                                         | Martinez-Hackert et al. (2009) |
| pull down                                         | Butland et al. (2005)          |
| pull down                                         | Martinez-Hackert et al. (2009) |
| pull down                                         | Arifuzzaman et al. (2006)      |
| pull down                                         | Arifuzzaman et al. (2006)      |
| pull down                                         | Butland et al. (2005)          |
| pull down                                         | Martinez-Hackert et al. (2009) |
| pull down                                         | Martinez-Hackert et al. (2009) |
| pull down                                         | Martinez-Hackert et al. (2009) |
| pull down                                         | Martinez-Hackert et al. (2009) |
| comigration in non denaturing gel electrophoresis | Pan et al.                     |
| pull down                                         | Arifuzzaman et al. (2006)      |
| pull down                                         | Arifuzzaman et al. (2006)      |
| pull down                                         | Martinez-Hackert et al. (2009) |
| pull down                                         | Butland et al. (2005)          |
| pull down                                         | Martinez-Hackert et al. (2009) |
| two hybrid array                                  | Rajagopala et al. (2009)       |
| pull down                                         | Butland et al. (2005)          |



pull down

Butland et al. (2005)

two hybrid array

Rajagopala et al. (2009)

pull down

Butland et al. (2005)

pull down

Arifuzzaman et al. (2006)

pull down

Butland et al. (2005)

pull down

Arifuzzaman et al. (2006)

pull down

Butland et al. (2005)

two hybrid array

Rajagopala et al. (2009)

pull down

Butland et al. (2005)

two hybrid array

Rajagopala et al. (2009)

pull down

Butland et al. (2005)

pull down

Arifuzzaman et al. (2006)

pull down  
pull down

Arifuzzaman et al. (2006)  
Arifuzzaman et al. (2006)

pull down

Arifuzzaman et al. (2006)

pull down  
pull down  
pull down  
pull down  
pull down  
pull down  
pull down

Arifuzzaman et al. (2006)  
Arifuzzaman et al. (2006)

pull down  
pull down  
pull down  
pull down  
pull down  
pull down

Arifuzzaman et al. (2006)  
Arifuzzaman et al. (2006)

pull down  
pull down  
pull down  
pull down  
pull down  
two hybrid array  
two hybrid array  
two hybrid array  
pull down  
pull down  
pull down  
pull down  
pull down  
pull down

Arifuzzaman et al. (2006)  
Butland et al. (2005)  
Butland et al. (2005)  
Butland et al. (2005)  
Butland et al. (2005)  
Rajagopala et al. (2009)  
Rajagopala et al. (2009)  
Rajagopala et al. (2009)  
Butland et al. (2005)  
Butland et al. (2005)  
Arifuzzaman et al. (2006)  
Butland et al. (2005)  
Butland et al. (2005)  
Butland et al. (2005)







pull down  
blue native page  
pull down  
blue native page  
pull down  
pull down  
pull down

pull down  
pull down  
pull down

pull down  
pull down  
pull down  
pull down  
pull down  
pull down  
pull down  
pull down  
pull down  
pull down  
pull down  
pull down  
pull down  
pull down  
pull down  
pull down  
pull down  
pull down  
pull down  
pull down  
pull down  
pull down

pull down  
pull down

Arifuzzaman et al. (2006)  
Lasserre et al. (2006)  
Butland et al. (2005)  
Arifuzzaman et al. (2006)  
Butland et al. (2005)  
Arifuzzaman et al. (2006)  
Lasserre et al. (2006)  
Butland et al. (2005)  
Arifuzzaman et al. (2006)  
Arifuzzaman et al. (2006)

Arifuzzaman et al. (2006)  
Arifuzzaman et al. (2006)  
Arifuzzaman et al. (2006)

Arifuzzaman et al. (2006)  
Arifuzzaman et al. (2006)  
Arifuzzaman et al. (2006)  
Arifuzzaman et al. (2006)  
Arifuzzaman et al. (2006)  
Arifuzzaman et al. (2006)  
Arifuzzaman et al. (2006)  
Arifuzzaman et al. (2006)  
Arifuzzaman et al. (2006)  
Arifuzzaman et al. (2006)  
Arifuzzaman et al. (2006)  
Arifuzzaman et al. (2006)  
Arifuzzaman et al. (2006)  
Arifuzzaman et al. (2006)  
Arifuzzaman et al. (2006)  
Arifuzzaman et al. (2006)  
Arifuzzaman et al. (2006)  
Arifuzzaman et al. (2006)  
Arifuzzaman et al. (2006)  
Arifuzzaman et al. (2006)  
Arifuzzaman et al. (2006)  
Arifuzzaman et al. (2006)

Arifuzzaman et al. (2006)  
Arifuzzaman et al. (2006)







pull down

Butland et al. (2005)

pull down

Arifuzzaman et al. (2006)

pull down

Butland et al. (2005)

pull down

Arifuzzaman et al. (2006)

pull down

Butland et al. (2005)

pull down

Arifuzzaman et al. (2006)

blue native page

Lasserre et al. (2006)

pull down

Arifuzzaman et al. (2006)



pull down  
pull down

Arifuzzaman et al. (2006)  
Arifuzzaman et al. (2006)

pull down  
pull down  
pull down  
pull down  
pull down  
pull down  
pull down

Arifuzzaman et al. (2006)  
Butland et al. (2005)  
Arifuzzaman et al. (2006)  
Arifuzzaman et al. (2006)  
Arifuzzaman et al. (2006)  
Arifuzzaman et al. (2006)  
Arifuzzaman et al. (2006)

tandem affinity purification  
tandem affinity purification  
affinity chromatography technology  
tandem affinity purification  
tandem affinity purification  
tandem affinity purification  
tandem affinity purification  
pull down  
pull down  
pull down  
pull down  
tandem affinity purification  
tandem affinity purification  
tandem affinity purification  
pull down

Gully et al. (2006)  
Butland et al. (2005)  
Butland et al. (2005)  
Butland et al. (2005)  
Butland et al. (2005)  
Gully et al. (2006)  
Gully et al. (2006)  
Gully et al. (2006)  
Butland et al. (2005)

pull down  
pull down  
pull down  
blue native page  
pull down

Arifuzzaman et al. (2006)  
Arifuzzaman et al. (2006)  
Arifuzzaman et al. (2006)  
Lasserre et al. (2006)  
Arifuzzaman et al. (2006)

pull down  
pull down  
pull down

Arifuzzaman et al. (2006)  
Arifuzzaman et al. (2006)  
Arifuzzaman et al. (2006)

pull down  
pull down  
pull down  
pull down

Arifuzzaman et al. (2006)  
Arifuzzaman et al. (2006)  
Arifuzzaman et al. (2006)  
Arifuzzaman et al. (2006)





pull down

Arifuzzaman et al. (2006)

pull down

Butland et al. (2005)

pull down

Arifuzzaman et al. (2006)



pull down  
pull down  
pull down  
pull down

Arifuzzaman et al. (2006)  
Arifuzzaman et al. (2006)  
Arifuzzaman et al. (2006)  
Arifuzzaman et al. (2006)

pull down  
pull down  
pull down  
pull down

Arifuzzaman et al. (2006)  
Arifuzzaman et al. (2006)  
Arifuzzaman et al. (2006)  
Arifuzzaman et al. (2006)

pull down  
pull down  
pull down

Arifuzzaman et al. (2006)  
Arifuzzaman et al. (2006)  
Arifuzzaman et al. (2006)

pull down

Arifuzzaman et al. (2006)

pull down  
pull down  
pull down  
pull down  
pull down

Arifuzzaman et al. (2006)  
Arifuzzaman et al. (2006)  
Arifuzzaman et al. (2006)  
Arifuzzaman et al. (2006)  
Arifuzzaman et al. (2006)

pull down  
pull down  
pull down  
pull down  
pull down  
pull down  
pull down

Arifuzzaman et al. (2006)  
Arifuzzaman et al. (2006)

pull down  
pull down  
pull down

Arifuzzaman et al. (2006)  
Arifuzzaman et al. (2006)  
Arifuzzaman et al. (2006)



pull down  
pull down  
pull down  
pull down  
pull down  
pull down

Arifuzzaman et al. (2006)  
Arifuzzaman et al. (2006)

pull down  
pull down

Arifuzzaman et al. (2006)  
Arifuzzaman et al. (2006)

pull down  
pull down  
pull down

Butland et al. (2005)  
Butland et al. (2005)  
Butland et al. (2005)

pull down  
pull down

Butland et al. (2005)  
Butland et al. (2005)

pull down  
pull down  
pull down

Arifuzzaman et al. (2006)  
Arifuzzaman et al. (2006)  
Arifuzzaman et al. (2006)

pull down  
pull down  
pull down  
pull down  
pull down  
pull down

Arifuzzaman et al. (2006)  
Arifuzzaman et al. (2006)

pull down  
pull down

Butland et al. (2005)  
Arifuzzaman et al. (2006)  
Arifuzzaman et al. (2006)

pull down  
pull down

Arifuzzaman et al. (2006)  
Arifuzzaman et al. (2006)

pull down  
pull down  
pull down  
pull down

Butland et al. (2005)  
Butland et al. (2005)  
Arifuzzaman et al. (2006)  
Arifuzzaman et al. (2006)

pull down  
pull down

Arifuzzaman et al. (2006)  
Arifuzzaman et al. (2006)

pull down

Arifuzzaman et al. (2006)

pull down  
pull down

Butland et al. (2005)  
Arifuzzaman et al. (2006)  
Arifuzzaman et al. (2006)  
Butland et al. (2005)  
Arifuzzaman et al. (2006)  
Arifuzzaman et al. (2006)  
Arifuzzaman et al. (2006)  
Arifuzzaman et al. (2006)

pull down  
pull down

Arifuzzaman et al. (2006)  
Arifuzzaman et al. (2006)  
Butland et al. (2005)  
Arifuzzaman et al. (2006)  
Arifuzzaman et al. (2006)  
Arifuzzaman et al. (2006)  
Arifuzzaman et al. (2006)  
Butland et al. (2005)  
Arifuzzaman et al. (2006)  
Butland et al. (2005)  
Butland et al. (2005)

pull down  
pull down  
pull down

Arifuzzaman et al. (2006)  
Arifuzzaman et al. (2006)  
Arifuzzaman et al. (2006)

pull down  
pull down  
pull down

Arifuzzaman et al. (2006)  
Arifuzzaman et al. (2006)  
Arifuzzaman et al. (2006)

pull down  
pull down

Arifuzzaman et al. (2006)  
Arifuzzaman et al. (2006)

blue native page

Lasserre et al. (2006)

pull down  
pull down

Arifuzzaman et al. (2006)  
Arifuzzaman et al. (2006)

pull down  
pull down  
pull down  
pull down  
pull down

Arifuzzaman et al. (2006)  
Arifuzzaman et al. (2006)  
Arifuzzaman et al. (2006)  
Arifuzzaman et al. (2006)  
Arifuzzaman et al. (2006)

pull down  
pull down

Butland et al. (2005)  
Butland et al. (2005)

pull down  
pull down  
pull down  
pull down  
pull down  
pull down

Arifuzzaman et al. (2006)  
Arifuzzaman et al. (2006)



pull down  
pull down

Butland et al. (2005)  
Arifuzzaman et al. (2006)  
Butland et al. (2005)  
Arifuzzaman et al. (2006)  
Butland et al. (2005)

pull down  
pull down  
pull down  
pull down

Arifuzzaman et al. (2006)  
Arifuzzaman et al. (2006)  
Arifuzzaman et al. (2006)  
Arifuzzaman et al. (2006)

pull down  
pull down  
pull down  
pull down

Arifuzzaman et al. (2006)  
Arifuzzaman et al. (2006)  
Arifuzzaman et al. (2006)  
Arifuzzaman et al. (2006)

pull down

Butland et al. (2005)

pull down  
pull down  
pull down

Butland et al. (2005)  
Arifuzzaman et al. (2006)  
Arifuzzaman et al. (2006)

pull down

Arifuzzaman et al. (2006)

pull down  
pull down  
pull down  
pull down  
pull down  
pull down  
pull down

Arifuzzaman et al. (2006)  
Arifuzzaman et al. (2006)

pull down  
pull down

Arifuzzaman et al. (2006)  
Arifuzzaman et al. (2006)

pull down  
pull down

Arifuzzaman et al. (2006)  
Arifuzzaman et al. (2006)

pull down  
pull down

Arifuzzaman et al. (2006)  
Arifuzzaman et al. (2006)

pull down

Arifuzzaman et al. (2006)





pull down  
pull down  
pull down  
pull down  
pull down  
pull down  
pull down

Arifuzzaman et al. (2006)  
Arifuzzaman et al. (2006)

pull down

Arifuzzaman et al. (2006)

pull down  
pull down

Butland et al. (2005)  
Arifuzzaman et al. (2006)  
Arifuzzaman et al. (2006)  
Arifuzzaman et al. (2006)  
Butland et al. (2005)  
Butland et al. (2005)  
Arifuzzaman et al. (2006)  
Butland et al. (2005)  
Butland et al. (2005)  
Arifuzzaman et al. (2006)  
Arifuzzaman et al. (2006)  
Arifuzzaman et al. (2006)  
Arifuzzaman et al. (2006)  
Butland et al. (2005)  
Butland et al. (2005)  
Arifuzzaman et al. (2006)

pull down  
pull down

Butland et al. (2005)  
Arifuzzaman et al. (2006)  
Arifuzzaman et al. (2006)  
Butland et al. (2005)

pull down  
pull down  
pull down  
pull down  
pull down  
pull down  
pull down

Butland et al. (2005)  
Butland et al. (2005)

pull down

Arifuzzaman et al. (2006)

pull down

Butland et al. (2005)

pull down

Arifuzzaman et al. (2006)

two hybrid array

Rajagopala et al. (2009)

pull down  
pull down

Arifuzzaman et al. (2006)  
Arifuzzaman et al. (2006)

pull down  
pull down

Arifuzzaman et al. (2006)  
Arifuzzaman et al. (2006)

pull down  
pull down  
pull down  
pull down

Arifuzzaman et al. (2006)  
Arifuzzaman et al. (2006)  
Arifuzzaman et al. (2006)  
Arifuzzaman et al. (2006)

pull down  
pull down

Arifuzzaman et al. (2006)  
Arifuzzaman et al. (2006)

pull down

Arifuzzaman et al. (2006)

pull down  
pull down  
pull down

Arifuzzaman et al. (2006)  
Arifuzzaman et al. (2006)  
Arifuzzaman et al. (2006)

























|          |                  |                  |             |
|----------|------------------|------------------|-------------|
| 15690043 | Escherichia coli | Escherichia coli | association |
| 15690043 | Escherichia coli | Escherichia coli | association |
| 15690043 | Escherichia coli | Escherichia coli | association |
| 15690043 | Escherichia coli | Escherichia coli | association |
| 15690043 | Escherichia coli | Escherichia coli | association |
| 15690043 | Escherichia coli | Escherichia coli | association |
| 15690043 | Escherichia coli | Escherichia coli | association |
| 16606699 | Escherichia coli | Escherichia coli | association |
| 15690043 | Escherichia coli | Escherichia coli | association |

|          |                  |                  |             |
|----------|------------------|------------------|-------------|
| 16606699 | Escherichia coli | Escherichia coli | association |
| 16606699 | Escherichia coli | Escherichia coli | association |

|          |                  |                  |                    |
|----------|------------------|------------------|--------------------|
| 15336558 | Escherichia coli | Escherichia coli | direct interaction |
|----------|------------------|------------------|--------------------|

|          |                  |                  |                      |
|----------|------------------|------------------|----------------------|
| 16606699 | Escherichia coli | Escherichia coli | physical association |
|----------|------------------|------------------|----------------------|

|               |                  |                  |                      |
|---------------|------------------|------------------|----------------------|
| 15690043      | Escherichia coli | Escherichia coli | association          |
| 15690043      | Escherichia coli | Escherichia coli | association          |
| 15690043      | Escherichia coli | Escherichia coli | association          |
| 15690043      | Escherichia coli | Escherichia coli | association          |
| imex:IM-14417 | Escherichia coli | Escherichia coli | direct interaction   |
| 15690043      | Escherichia coli | Escherichia coli | association          |
| 15690043      | Escherichia coli | Escherichia coli | association          |
| 15690043      | Escherichia coli | Escherichia coli | association          |
| imex:IM-11954 | Escherichia coli | Escherichia coli | physical association |
| imex:IM-11954 | Escherichia coli | Escherichia coli | physical association |
| 16606699      | Escherichia coli | Escherichia coli | association          |
| 15690043      | Escherichia coli | Escherichia coli | association          |
| 16606699      | Escherichia coli | Escherichia coli | association          |
| 16606699      | Escherichia coli | Escherichia coli | association          |
| 15690043      | Escherichia coli | Escherichia coli | association          |
| 16606699      | Escherichia coli | Escherichia coli | association          |
| 15690043      | Escherichia coli | Escherichia coli | association          |



|               |          |                  |                  |                      |
|---------------|----------|------------------|------------------|----------------------|
|               | 15690043 | Escherichia coli | Escherichia coli | association          |
|               | 15690043 | Escherichia coli | Escherichia coli | association          |
|               | 15690043 | Escherichia coli | Escherichia coli | association          |
|               | 15690043 | Escherichia coli | Escherichia coli | association          |
|               | 12071968 | Escherichia coli | Escherichia coli | physical association |
| imex:IM-14417 |          | Escherichia coli | Escherichia coli | direct interaction   |
|               | 15690043 | Escherichia coli | Escherichia coli | association          |
|               | 15690043 | Escherichia coli | Escherichia coli | association          |
| imex:IM-11954 |          | Escherichia coli | Escherichia coli | direct interaction   |
| imex:IM-11954 |          | Escherichia coli | Escherichia coli | direct interaction   |
| imex:IM-11954 |          | Escherichia coli | Escherichia coli | direct interaction   |
| imex:IM-14417 |          | Escherichia coli | Escherichia coli | direct interaction   |
|               | 15690043 | Escherichia coli | Escherichia coli | association          |
|               | 16606699 | Escherichia coli | Escherichia coli | association          |
|               | 15690043 | Escherichia coli | Escherichia coli | association          |
|               | 16606699 | Escherichia coli | Escherichia coli | association          |
| imex:IM-9154  |          | Escherichia coli | Escherichia coli | physical association |
|               | 16606699 | Escherichia coli | Escherichia coli | physical association |
| imex:IM-9154  |          | Escherichia coli | Escherichia coli | physical association |
|               | 12071968 | Escherichia coli | Escherichia coli | physical association |
|               | 15690043 | Escherichia coli | Escherichia coli | association          |
|               | 15690043 | Escherichia coli | Escherichia coli | association          |
|               | 15690043 | Escherichia coli | Escherichia coli | association          |
|               | 15690043 | Escherichia coli | Escherichia coli | association          |
|               | 16606699 | Escherichia coli | Escherichia coli | physical association |
|               | 16606699 | Escherichia coli | Escherichia coli | association          |
| imex:IM-9154  |          | Escherichia coli | Escherichia coli | physical association |
|               | 16606699 | Escherichia coli | Escherichia coli | association          |
|               | 16606699 | Escherichia coli | Escherichia coli | association          |
|               | 16606699 | Escherichia coli | Escherichia coli | association          |
|               | 16606699 | Escherichia coli | Escherichia coli | association          |
|               | 15690043 | Escherichia coli | Escherichia coli | association          |
|               | 16606699 | Escherichia coli | Escherichia coli | association          |
|               | 15690043 | Escherichia coli | Escherichia coli | association          |
|               | 12426582 | Escherichia coli | Escherichia coli | direct interaction   |
|               | 12235156 | Escherichia coli | Escherichia coli | direct interaction   |













|          |                  |                  |                      |
|----------|------------------|------------------|----------------------|
| 16606699 | Escherichia coli | Escherichia coli | association          |
| 16606699 | Escherichia coli | Escherichia coli | physical association |
| 16606699 | Escherichia coli | Escherichia coli | association          |
| 16606699 | Escherichia coli | Escherichia coli | association          |
| 16858726 | Escherichia coli | Escherichia coli | physical association |
| 16606699 | Escherichia coli | Escherichia coli | physical association |
| 16606699 | Escherichia coli | Escherichia coli | association          |
| 15690043 | Escherichia coli | Escherichia coli | physical association |
| 15690043 | Escherichia coli | Escherichia coli | association          |
| 16606699 | Escherichia coli | Escherichia coli | association          |
| 15690043 | Escherichia coli | Escherichia coli | association          |
| 16606699 | Escherichia coli | Escherichia coli | association          |
| 16606699 | Escherichia coli | Escherichia coli | association          |
| 16606699 | Escherichia coli | Escherichia coli | association          |
| 15690043 | Escherichia coli | Escherichia coli | association          |
| 16606699 | Escherichia coli | Escherichia coli | association          |
| 16606699 | Escherichia coli | Escherichia coli | association          |
| 16606699 | Escherichia coli | Escherichia coli | association          |
| 15690043 | Escherichia coli | Escherichia coli | association          |
| 15690043 | Escherichia coli | Escherichia coli | association          |
| 16606699 | Escherichia coli | Escherichia coli | association          |
| 16606699 | Escherichia coli | Escherichia coli | association          |
| 16606699 | Escherichia coli | Escherichia coli | association          |
| 15690043 | Escherichia coli | Escherichia coli | association          |
| 16606699 | Escherichia coli | Escherichia coli | association          |
| 16606699 | Escherichia coli | Escherichia coli | association          |
| 15690043 | Escherichia coli | Escherichia coli | association          |























|              |          |                  |                  |                      |
|--------------|----------|------------------|------------------|----------------------|
|              | 10966645 | Escherichia coli | Escherichia coli | physical association |
|              | 15690043 | Escherichia coli | Escherichia coli | association          |
|              | 15690043 | Escherichia coli | Escherichia coli | association          |
|              | 15690043 | Escherichia coli | Escherichia coli | association          |
|              | 16858726 | Escherichia coli | Escherichia coli | physical association |
| imex:IM-9154 |          | Escherichia coli | Escherichia coli | physical association |
|              | 16858726 | Escherichia coli | Escherichia coli | physical association |
|              | 15690043 | Escherichia coli | Escherichia coli | association          |
| imex:IM-9154 |          | Escherichia coli | Escherichia coli | physical association |
|              | 15690043 | Escherichia coli | Escherichia coli | association          |
|              | 15690043 | Escherichia coli | Escherichia coli | association          |
|              | 16606699 | Escherichia coli | Escherichia coli | association          |
|              | 16606699 | Escherichia coli | Escherichia coli | association          |
|              | 15690043 | Escherichia coli | Escherichia coli | association          |
|              | 16606699 | Escherichia coli | Escherichia coli | association          |
|              | 15690043 | Escherichia coli | Escherichia coli | association          |
|              | 16606699 | Escherichia coli | Escherichia coli | association          |
|              | 15690043 | Escherichia coli | Escherichia coli | association          |
|              | 15690043 | Escherichia coli | Escherichia coli | association          |
|              | 15690043 | Escherichia coli | Escherichia coli | association          |
|              | 15690043 | Escherichia coli | Escherichia coli | association          |
|              | 15690043 | Escherichia coli | Escherichia coli | association          |
|              | 15690043 | Escherichia coli | Escherichia coli | association          |
|              | 15690043 | Escherichia coli | Escherichia coli | association          |
|              | 15690043 | Escherichia coli | Escherichia coli | association          |
|              | 16606699 | Escherichia coli | Escherichia coli | physical association |
|              | 15690043 | Escherichia coli | Escherichia coli | association          |
|              | 8596629  | Escherichia coli | Escherichia coli | direct interaction   |
|              | 16858726 | Escherichia coli | Escherichia coli | physical association |
|              | 15690043 | Escherichia coli | Escherichia coli | association          |
|              | 15690043 | Escherichia coli | Escherichia coli | physical association |
|              | 15690043 | Escherichia coli | Escherichia coli | association          |
|              | 15690043 | Escherichia coli | Escherichia coli | association          |
|              | 15690043 | Escherichia coli | Escherichia coli | association          |
|              | 16606699 | Escherichia coli | Escherichia coli | association          |
|              | 16606699 | Escherichia coli | Escherichia coli | association          |
|              | 15690043 | Escherichia coli | Escherichia coli | association          |









|          |                  |                  |                      |
|----------|------------------|------------------|----------------------|
| 15690043 | Escherichia coli | Escherichia coli | association          |
| 15690043 | Escherichia coli | Escherichia coli | association          |
| 15690043 | Escherichia coli | Escherichia coli | association          |
| 15690043 | Escherichia coli | Escherichia coli | association          |
| 16606699 | Escherichia coli | Escherichia coli | association          |
| 16606699 | Escherichia coli | Escherichia coli | association          |
| 16858726 | Escherichia coli | Escherichia coli | physical association |
| 16606699 | Escherichia coli | Escherichia coli | association          |
| 16606699 | Escherichia coli | Escherichia coli | association          |

|          |                  |                  |             |
|----------|------------------|------------------|-------------|
| 16606699 | Escherichia coli | Escherichia coli | association |
| 16606699 | Escherichia coli | Escherichia coli | association |
| 16606699 | Escherichia coli | Escherichia coli | association |
| 16606699 | Escherichia coli | Escherichia coli | association |
| 16606699 | Escherichia coli | Escherichia coli | association |
| 16606699 | Escherichia coli | Escherichia coli | association |
| 16606699 | Escherichia coli | Escherichia coli | association |
| 16606699 | Escherichia coli | Escherichia coli | association |

|          |                  |                  |                      |
|----------|------------------|------------------|----------------------|
| 19834901 | Escherichia coli | Escherichia coli | physical association |
| 19834901 | Escherichia coli | Escherichia coli | physical association |

|               |                  |                  |                      |
|---------------|------------------|------------------|----------------------|
| imex:IM-11919 | Escherichia coli | Escherichia coli | association          |
| imex:IM-11919 | Escherichia coli | Escherichia coli | association          |
| imex:IM-11919 | Escherichia coli | Escherichia coli | physical association |
| imex:IM-14143 | Escherichia coli | Escherichia coli | physical association |
| imex:IM-11919 | Escherichia coli | Escherichia coli | association          |
| imex:IM-11919 | Escherichia coli | Escherichia coli | physical association |
| imex:IM-14143 | Escherichia coli | Escherichia coli | physical association |
| 12010488      | Escherichia coli | Escherichia coli | direct interaction   |
| 12010488      | Escherichia coli | Escherichia coli | direct interaction   |
| 10446051      | Escherichia coli | Escherichia coli | direct interaction   |
| imex:IM-11919 | Escherichia coli | Escherichia coli | association          |
| imex:IM-11919 | Escherichia coli | Escherichia coli | physical association |
| imex:IM-14143 | Escherichia coli | Escherichia coli | physical association |











|          |                  |                  |                      |
|----------|------------------|------------------|----------------------|
| 10209756 | Escherichia coli | Escherichia coli | physical association |
| 16606699 | Escherichia coli | Escherichia coli | association          |
| 16606699 | Escherichia coli | Escherichia coli | association          |
| 16606699 | Escherichia coli | Escherichia coli | association          |
| 10880432 | Escherichia coli | Escherichia coli | direct interaction   |
| 15690043 | Escherichia coli | Escherichia coli | association          |
| 15690043 | Escherichia coli | Escherichia coli | association          |
| 15690043 | Escherichia coli | Escherichia coli | association          |
| 15690043 | Escherichia coli | Escherichia coli | association          |
| 16606699 | Escherichia coli | Escherichia coli | association          |
| 16606699 | Escherichia coli | Escherichia coli | association          |
| 16606699 | Escherichia coli | Escherichia coli | association          |
| 16606699 | Escherichia coli | Escherichia coli | association          |
| 16606699 | Escherichia coli | Escherichia coli | physical association |
| 16606699 | Escherichia coli | Escherichia coli | association          |
| 16606699 | Escherichia coli | Escherichia coli | association          |
| 16606699 | Escherichia coli | Escherichia coli | association          |
| 15690043 | Escherichia coli | Escherichia coli | association          |
| 15690043 | Escherichia coli | Escherichia coli | association          |
| 15690043 | Escherichia coli | Escherichia coli | association          |
| 15690043 | Escherichia coli | Escherichia coli | association          |
| 15690043 | Escherichia coli | Escherichia coli | association          |
| 15690043 | Escherichia coli | Escherichia coli | association          |
| 15690043 | Escherichia coli | Escherichia coli | association          |
| 15690043 | Escherichia coli | Escherichia coli | association          |
| 16606699 | Escherichia coli | Escherichia coli | physical association |
| 16606699 | Escherichia coli | Escherichia coli | association          |
| 16606699 | Escherichia coli | Escherichia coli | association          |
| 16858726 | Escherichia coli | Escherichia coli | physical association |
| 16858726 | Escherichia coli | Escherichia coli | physical association |
| 16606699 | Escherichia coli | Escherichia coli | association          |
| 16606699 | Escherichia coli | Escherichia coli | association          |























































































|          |                  |                  |                      |
|----------|------------------|------------------|----------------------|
| 16606699 | Escherichia coli | Escherichia coli | physical association |
| 12838411 | Escherichia coli | Escherichia coli | physical association |
| 16606699 | Escherichia coli | Escherichia coli | association          |
| 15690043 | Escherichia coli | Escherichia coli | association          |
| 15690043 | Escherichia coli | Escherichia coli | association          |
| 16606699 | Escherichia coli | Escherichia coli | association          |
| 15690043 | Escherichia coli | Escherichia coli | association          |
| 16606699 | Escherichia coli | Escherichia coli | association          |
| 16606699 | Escherichia coli | Escherichia coli | association          |
| 16606699 | Escherichia coli | Escherichia coli | association          |
| 16606699 | Escherichia coli | Escherichia coli | association          |
| 16606699 | Escherichia coli | Escherichia coli | association          |
| 16606699 | Escherichia coli | Escherichia coli | association          |
| 16606699 | Escherichia coli | Escherichia coli | association          |
| 16858726 | Escherichia coli | Escherichia coli | physical association |
| 16079137 | Escherichia coli | Escherichia coli | physical association |
| 16606699 | Escherichia coli | Escherichia coli | association          |
| 16606699 | Escherichia coli | Escherichia coli | association          |
| 16606699 | Escherichia coli | Escherichia coli | association          |
| 16606699 | Escherichia coli | Escherichia coli | association          |
| 16606699 | Escherichia coli | Escherichia coli | association          |
| 16606699 | Escherichia coli | Escherichia coli | association          |
| 16606699 | Escherichia coli | Escherichia coli | association          |
| 15690043 | Escherichia coli | Escherichia coli | association          |
| 16606699 | Escherichia coli | Escherichia coli | association          |
| 15690043 | Escherichia coli | Escherichia coli | association          |
| 15690043 | Escherichia coli | Escherichia coli | association          |
| 16606699 | Escherichia coli | Escherichia coli | association          |





































































































































































































|          |                  |                  |                      |
|----------|------------------|------------------|----------------------|
| 15690043 | Escherichia coli | Escherichia coli | association          |
| 16606699 | Escherichia coli | Escherichia coli | association          |
| 16606699 | Escherichia coli | Escherichia coli | association          |
| 16606699 | Escherichia coli | Escherichia coli | physical association |
| 16606699 | Escherichia coli | Escherichia coli | association          |
| 16606699 | Escherichia coli | Escherichia coli | association          |
| 16606699 | Escherichia coli | Escherichia coli | association          |
| 16606699 | Escherichia coli | Escherichia coli | association          |
| 16606699 | Escherichia coli | Escherichia coli | association          |
| 16606699 | Escherichia coli | Escherichia coli | association          |
| 16606699 | Escherichia coli | Escherichia coli | association          |
| 16606699 | Escherichia coli | Escherichia coli | association          |
| 16606699 | Escherichia coli | Escherichia coli | association          |
| 16606699 | Escherichia coli | Escherichia coli | association          |
| 16606699 | Escherichia coli | Escherichia coli | association          |
| 16606699 | Escherichia coli | Escherichia coli | association          |
| 16606699 | Escherichia coli | Escherichia coli | association          |
| 16606699 | Escherichia coli | Escherichia coli | association          |
| 16606699 | Escherichia coli | Escherichia coli | association          |
| 16606699 | Escherichia coli | Escherichia coli | physical association |





|          |                  |                  |             |
|----------|------------------|------------------|-------------|
| 15690043 | Escherichia coli | Escherichia coli | association |
| 15690043 | Escherichia coli | Escherichia coli | association |
| 15690043 | Escherichia coli | Escherichia coli | association |
| 15690043 | Escherichia coli | Escherichia coli | association |
| 15690043 | Escherichia coli | Escherichia coli | association |
| 15690043 | Escherichia coli | Escherichia coli | association |
| 15690043 | Escherichia coli | Escherichia coli | association |

|          |                  |                  |                      |
|----------|------------------|------------------|----------------------|
| 16606699 | Escherichia coli | Escherichia coli | physical association |
|----------|------------------|------------------|----------------------|

|          |                  |                  |                      |
|----------|------------------|------------------|----------------------|
| 15690043 | Escherichia coli | Escherichia coli | physical association |
|----------|------------------|------------------|----------------------|

|          |                  |                  |                      |
|----------|------------------|------------------|----------------------|
| 16606699 | Escherichia coli | Escherichia coli | physical association |
|----------|------------------|------------------|----------------------|

|          |                  |                  |                      |
|----------|------------------|------------------|----------------------|
| 19834901 | Escherichia coli | Escherichia coli | physical association |
|----------|------------------|------------------|----------------------|

|          |                  |                  |             |
|----------|------------------|------------------|-------------|
| 16606699 | Escherichia coli | Escherichia coli | association |
| 16606699 | Escherichia coli | Escherichia coli | association |
| 16606699 | Escherichia coli | Escherichia coli | association |
| 16606699 | Escherichia coli | Escherichia coli | association |
| 16606699 | Escherichia coli | Escherichia coli | association |
| 16606699 | Escherichia coli | Escherichia coli | association |
| 16606699 | Escherichia coli | Escherichia coli | association |
| 16606699 | Escherichia coli | Escherichia coli | association |

|          |                  |                  |             |
|----------|------------------|------------------|-------------|
| 16606699 | Escherichia coli | Escherichia coli | association |
| 16606699 | Escherichia coli | Escherichia coli | association |

|          |                  |                  |             |
|----------|------------------|------------------|-------------|
| 16606699 | Escherichia coli | Escherichia coli | association |
| 16606699 | Escherichia coli | Escherichia coli | association |
| 16606699 | Escherichia coli | Escherichia coli | association |
| 16606699 | Escherichia coli | Escherichia coli | association |

|          |                  |                  |             |
|----------|------------------|------------------|-------------|
| 16606699 | Escherichia coli | Escherichia coli | association |
| 16606699 | Escherichia coli | Escherichia coli | association |

|          |                  |                  |                      |
|----------|------------------|------------------|----------------------|
| 16606699 | Escherichia coli | Escherichia coli | physical association |
|----------|------------------|------------------|----------------------|

|          |                  |                  |             |
|----------|------------------|------------------|-------------|
| 16606699 | Escherichia coli | Escherichia coli | association |
| 16606699 | Escherichia coli | Escherichia coli | association |
| 16606699 | Escherichia coli | Escherichia coli | association |



| Source database | Interaction identifier |
|-----------------|------------------------|
| intact          | EBI-1141682            |
| intact          | EBI-1771017            |
| intact          | EBI-907071             |
| intact          | EBI-1137900            |
| intact          | EBI-1138400            |
| intact          | EBI-882405             |
| intact          | EBI-889915             |
| intact          | EBI-1135857            |
| intact          | EBI-1135857            |
| intact          | EBI-889915             |
| intact          | EBI-1135857            |
| intact          | EBI-889915             |
| intact          | EBI-1135857            |
| intact          | EBI-889915             |
| intact          | EBI-882405             |
| intact          | EBI-889915             |
| intact          | EBI-890206             |
| intact          | EBI-890206             |
| intact          | EBI-882643             |
| intact          | EBI-890206             |
| intact          | EBI-1145313            |
| intact          | EBI-890206             |
| intact          | EBI-882643             |
| intact          | EBI-882643             |
| intact          | EBI-1145313            |
| intact          | EBI-1145313            |
| intact          | EBI-882643             |
| intact          | EBI-890206             |
| intact          | EBI-1145313            |
| intact          | EBI-1145313            |
| intact          | EBI-1145313            |
| intact          | EBI-1147289            |
| intact          | EBI-1147289            |

|        |             |
|--------|-------------|
| intact | EBI-1142466 |

|        |             |
|--------|-------------|
| intact | EBI-1139437 |
|--------|-------------|

|        |             |
|--------|-------------|
| intact | EBI-1135623 |
| intact | EBI-1135623 |
| intact | EBI-1135623 |

|        |            |
|--------|------------|
| intact | EBI-878935 |
| intact | EBI-882138 |
| intact | EBI-882138 |
| intact | EBI-878935 |
| intact | EBI-878935 |
| intact | EBI-882138 |
| intact | EBI-878935 |
| intact | EBI-882138 |
| intact | EBI-882138 |
| intact | EBI-878935 |
| intact | EBI-861865 |
| intact | EBI-852941 |
| intact | EBI-878935 |
| intact | EBI-882138 |
| intact | EBI-852941 |
| intact | EBI-878935 |
| intact | EBI-882138 |
| intact | EBI-878935 |
| intact | EBI-878935 |
| intact | EBI-878935 |
| intact | EBI-882138 |
| intact | EBI-878935 |
| intact | EBI-878935 |



|        |             |
|--------|-------------|
| intact | EBI-1139291 |
| intact | EBI-891082  |
| intact | EBI-1139291 |

|        |             |
|--------|-------------|
| intact | EBI-1138588 |
| intact | EBI-1138588 |
| intact | EBI-1138588 |

|        |             |
|--------|-------------|
| intact | EBI-1137372 |
| intact | EBI-1137372 |
| intact | EBI-1770986 |
| intact | EBI-1770986 |
| intact | EBI-1137372 |
| intact | EBI-1137372 |
| intact | EBI-1137372 |

|        |             |
|--------|-------------|
| intact | EBI-1137379 |
| intact | EBI-1137379 |
| intact | EBI-1137379 |

|        |            |
|--------|------------|
| intact | EBI-888995 |
| intact | EBI-881555 |
| intact | EBI-888995 |
| intact | EBI-881555 |
| intact | EBI-881555 |
| intact | EBI-888995 |
| intact | EBI-881555 |
| intact | EBI-888995 |
| intact | EBI-881555 |
| intact | EBI-888995 |
| intact | EBI-888995 |
| intact | EBI-888995 |

|        |            |
|--------|------------|
| intact | EBI-888995 |
| intact | EBI-888995 |
| intact | EBI-881555 |
| intact | EBI-888995 |

|        |             |
|--------|-------------|
| intact | EBI-1135292 |
| intact | EBI-1135292 |

|        |            |
|--------|------------|
| intact | EBI-884401 |
| intact | EBI-879773 |

|        |            |
|--------|------------|
| intact | EBI-894549 |
| intact | EBI-894549 |
| intact | EBI-889533 |
| intact | EBI-894549 |

|        |             |
|--------|-------------|
| intact | EBI-1141014 |

|        |             |
|--------|-------------|
| intact | EBI-1136995 |

|        |             |
|--------|-------------|
| intact | EBI-889682  |
| intact | EBI-1136950 |
| intact | EBI-1136950 |
| intact | EBI-889682  |
| intact | EBI-889682  |



|        |            |
|--------|------------|
| intact | EBI-886162 |

|        |             |
|--------|-------------|
| intact | EBI-887044  |
| intact | EBI-887044  |
| intact | EBI-1138417 |
| intact | EBI-1138417 |

|        |             |
|--------|-------------|
| intact | EBI-1136779 |
| intact | EBI-1136779 |
| intact | EBI-1136779 |

|        |             |
|--------|-------------|
| intact | EBI-1147992 |
|--------|-------------|

|        |             |
|--------|-------------|
| intact | EBI-1145778 |
| intact | EBI-1145778 |
| intact | EBI-1145778 |

|        |             |
|--------|-------------|
| intact | EBI-1145345 |
| intact | EBI-892144  |
| intact | EBI-1145345 |

|        |             |
|--------|-------------|
| intact | EBI-1136440 |
| intact | EBI-1136440 |
| intact | EBI-1136440 |

intact EBI-1146632

intact EBI-1146629

intact EBI-1144449

intact EBI-1144449

intact EBI-906660

intact EBI-878836

intact EBI-1212150

intact EBI-1212418

intact EBI-1213240

intact EBI-1213240

intact EBI-906660

intact EBI-1213240

intact EBI-1213240

intact EBI-1212150

intact EBI-1212418

intact EBI-1146615

intact EBI-1146615

intact EBI-1212150

intact EBI-1212418

intact EBI-1212150

intact EBI-1212150

intact EBI-1146615

intact EBI-906600

intact EBI-1146605

intact EBI-881946

intact EBI-878843

intact EBI-878843

intact EBI-881946

intact EBI-878843



intact EBI-881946

intact EBI-1145978  
intact EBI-1145978  
intact EBI-1145978  
intact EBI-1145978  
intact EBI-1145978  
intact EBI-1145978  
intact EBI-1145978

intact EBI-1147473  
intact EBI-1147473  
intact EBI-1147473  
intact EBI-1147473

intact EBI-1143003  
intact EBI-1143003  
intact EBI-1143003  
intact EBI-1143003  
intact EBI-1143003  
intact EBI-1143003  
intact EBI-1143003

intact EBI-1136177  
intact EBI-1136177  
intact EBI-1136177  
intact EBI-1136177  
intact EBI-1136177  
intact EBI-1136177

intact EBI-1145589  
intact EBI-1145589

intact EBI-1144239  
intact EBI-1144239



|        |             |
|--------|-------------|
| intact | EBI-1140631 |
| intact | EBI-885677  |
| intact | EBI-1138573 |
| intact | EBI-885677  |
| intact | EBI-885677  |
| intact | EBI-885677  |
| intact | EBI-892312  |
| intact | EBI-885677  |
| intact | EBI-1138573 |
| intact | EBI-885677  |
| intact | EBI-885677  |
| intact | EBI-885677  |
| intact | EBI-1138573 |
| intact | EBI-885677  |
| intact | EBI-885677  |
| intact | EBI-1138573 |
| intact | EBI-885677  |
| intact | EBI-1138573 |
| intact | EBI-885677  |
| intact | EBI-885677  |
| intact | EBI-892312  |
| intact | EBI-885677  |
| intact | EBI-892312  |
| intact | EBI-885677  |
| intact | EBI-1138573 |
| intact | EBI-885677  |
| intact | EBI-885677  |
| intact | EBI-892312  |
| intact | EBI-885677  |
| intact | EBI-892312  |
| intact | EBI-892312  |
| intact | EBI-885677  |

|        |             |
|--------|-------------|
| intact | EBI-892312  |
| intact | EBI-885677  |
| intact | EBI-885677  |
| intact | EBI-892312  |
| intact | EBI-892312  |
| intact | EBI-892312  |
| intact | EBI-885677  |
| intact | EBI-1138573 |
| intact | EBI-892312  |

|        |             |
|--------|-------------|
| intact | EBI-1147019 |
| intact | EBI-1147019 |

|        |             |
|--------|-------------|
| intact | EBI-1040059 |
|--------|-------------|

|        |             |
|--------|-------------|
| intact | EBI-1140406 |
|--------|-------------|

|        |             |
|--------|-------------|
| intact | EBI-885556  |
| intact | EBI-892166  |
| intact | EBI-885556  |
| intact | EBI-892166  |
| intact | EBI-976272  |
| intact | EBI-885556  |
| intact | EBI-892166  |
| intact | EBI-885556  |
| intact | EBI-1774611 |
| intact | EBI-1774969 |
| intact | EBI-1147540 |
| intact | EBI-885556  |
| intact | EBI-1147540 |
| intact | EBI-1147540 |
| intact | EBI-892166  |
| intact | EBI-1147540 |
| intact | EBI-885556  |

|        |             |
|--------|-------------|
| intact | EBI-892166  |
| intact | EBI-892166  |
| intact | EBI-885524  |
| intact | EBI-892151  |
| intact | EBI-2011448 |
| intact | EBI-976257  |
| intact | EBI-892151  |
| intact | EBI-885524  |
| intact | EBI-1774824 |
| intact | EBI-1775032 |
| intact | EBI-1774645 |
| intact | EBI-976140  |
| intact | EBI-885524  |
| intact | EBI-1147548 |
| intact | EBI-892151  |
| intact | EBI-1147548 |
| intact | EBI-1771031 |
| intact | EBI-1139262 |
| intact | EBI-1771031 |
| intact | EBI-2011448 |
| intact | EBI-885524  |
| intact | EBI-892151  |
| intact | EBI-892151  |
| intact | EBI-885524  |
| intact | EBI-1147597 |

|        |             |
|--------|-------------|
| intact | EBI-1137791 |
| intact | EBI-1771006 |
| intact | EBI-1137791 |
| intact | EBI-1137791 |

|        |             |
|--------|-------------|
| intact | EBI-1137443 |

|        |             |
|--------|-------------|
| intact | EBI-891593  |
| intact | EBI-1138254 |
| intact | EBI-891593  |
| intact | EBI-1034828 |
| intact | EBI-1034227 |

|        |             |
|--------|-------------|
| intact | EBI-1038313 |
| intact | EBI-1038324 |
| intact | EBI-891593  |
| intact | EBI-884758  |
| intact | EBI-1138254 |
| intact | EBI-1138254 |
| intact | EBI-1138254 |
| intact | EBI-884758  |
| intact | EBI-1138254 |
| intact | EBI-1138254 |
| intact | EBI-891593  |
| intact | EBI-891593  |
| intact | EBI-884758  |
| intact | EBI-891593  |
| intact | EBI-891593  |
| intact | EBI-884758  |
| intact | EBI-891593  |
| intact | EBI-1138254 |
| intact | EBI-891593  |
| intact | EBI-1138254 |
| intact | EBI-891593  |
| intact | EBI-884758  |
| intact | EBI-891593  |
| intact | EBI-891593  |
| intact | EBI-884758  |
| intact | EBI-884758  |
| intact | EBI-884758  |
| intact | EBI-891593  |
| intact | EBI-884758  |
| intact | EBI-891593  |
| intact | EBI-891593  |
| intact | EBI-884758  |
| intact | EBI-891593  |
| intact | EBI-884758  |
| intact | EBI-891593  |
| intact | EBI-891593  |
| intact | EBI-884758  |

|        |             |
|--------|-------------|
| intact | EBI-884758  |
| intact | EBI-1138254 |
| intact | EBI-891593  |
| intact | EBI-1138254 |
| intact | EBI-891593  |
| intact | EBI-891593  |

|        |             |
|--------|-------------|
| intact | EBI-1143404 |
| intact | EBI-891673  |
| intact | EBI-1143404 |
| intact | EBI-906951  |
| intact | EBI-884811  |
| intact | EBI-891673  |
| intact | EBI-891673  |
| intact | EBI-906951  |
| intact | EBI-891673  |
| intact | EBI-891673  |
| intact | EBI-1143404 |
| intact | EBI-1143404 |
| intact | EBI-1143404 |
| intact | EBI-891673  |
| intact | EBI-1143404 |
| intact | EBI-891673  |
| intact | EBI-1143404 |
| intact | EBI-891673  |
| intact | EBI-906951  |
| intact | EBI-891673  |
| intact | EBI-891673  |
| intact | EBI-884811  |
| intact | EBI-891673  |
| intact | EBI-891673  |
| intact | EBI-891673  |
| intact | EBI-1143404 |
| intact | EBI-891673  |
| intact | EBI-1143404 |
| intact | EBI-1143404 |
| intact | EBI-891673  |
| intact | EBI-1143404 |

|        |             |
|--------|-------------|
| intact | EBI-1141122 |
| intact | EBI-1141122 |
| intact | EBI-1141122 |

|        |            |
|--------|------------|
| intact | EBI-885165 |
| intact | EBI-891949 |
| intact | EBI-885165 |
| intact | EBI-885165 |

|        |             |
|--------|-------------|
| intact | EBI-879643  |
| intact | EBI-883980  |
| intact | EBI-883980  |
| intact | EBI-879643  |
| intact | EBI-883980  |
| intact | EBI-1140933 |
| intact | EBI-883980  |
| intact | EBI-883980  |
| intact | EBI-883980  |
| intact | EBI-906966  |
| intact | EBI-883980  |
| intact | EBI-883980  |
| intact | EBI-879643  |
| intact | EBI-883980  |
| intact | EBI-906966  |
| intact | EBI-879643  |
| intact | EBI-883980  |
| intact | EBI-1140933 |
| intact | EBI-879643  |
| intact | EBI-883980  |
| intact | EBI-883980  |
| intact | EBI-883980  |



|        |             |
|--------|-------------|
| intact | EBI-883980  |
| intact | EBI-883980  |
| intact | EBI-883980  |
| intact | EBI-879643  |
| intact | EBI-883980  |
| intact | EBI-879643  |
| intact | EBI-883980  |
| intact | EBI-1140933 |
| intact | EBI-879643  |
| intact | EBI-883980  |
| intact | EBI-883980  |
| intact | EBI-883980  |
| intact | EBI-879643  |
| intact | EBI-883980  |
| intact | EBI-1140933 |
| intact | EBI-883980  |
| intact | EBI-879643  |
| intact | EBI-883980  |
| intact | EBI-883980  |
| intact | EBI-1140933 |
| intact | EBI-879643  |
| intact | EBI-883980  |
| intact | EBI-883980  |
| intact | EBI-879643  |
| intact | EBI-879643  |
| intact | EBI-879643  |
| intact | EBI-883980  |
| intact | EBI-879643  |
| intact | EBI-879643  |
| intact | EBI-883980  |
| intact | EBI-883980  |
| intact | EBI-879643  |
| intact | EBI-1140933 |
| intact | EBI-883980  |
| intact | EBI-879643  |
| intact | EBI-883980  |
| intact | EBI-883980  |
| intact | EBI-883980  |
| intact | EBI-1140933 |
| intact | EBI-879643  |
| intact | EBI-883980  |
| intact | EBI-1140933 |



|        |            |
|--------|------------|
| intact | EBI-879539 |
| intact | EBI-883767 |
| intact | EBI-879539 |
| intact | EBI-883767 |
| intact | EBI-883767 |
| intact | EBI-883767 |
| intact | EBI-879539 |
| intact | EBI-879539 |
| intact | EBI-883767 |
| intact | EBI-879539 |
| intact | EBI-883767 |
| intact | EBI-883767 |
| intact | EBI-879539 |
| intact | EBI-883767 |
| intact | EBI-883767 |
| intact | EBI-879539 |
| intact | EBI-883767 |
| intact | EBI-883767 |

|        |             |
|--------|-------------|
| intact | EBI-1213228 |
| intact | EBI-1213228 |

|        |             |
|--------|-------------|
| intact | EBI-1136296 |
| intact | EBI-1136296 |
| intact | EBI-1136296 |

|        |             |
|--------|-------------|
| intact | EBI-1139431 |

|        |             |
|--------|-------------|
| intact | EBI-1145699 |
|--------|-------------|

|        |             |
|--------|-------------|
| intact | EBI-1143874 |
|--------|-------------|

|        |             |
|--------|-------------|
| intact | EBI-1143882 |
|--------|-------------|

|        |             |
|--------|-------------|
| intact | EBI-1142744 |
| intact | EBI-1771057 |
| intact | EBI-1771057 |

intact EBI-1142744

intact EBI-1142780

intact EBI-1142999

intact EBI-1142999

intact EBI-906996

intact EBI-1142975

intact EBI-1147250

intact EBI-893204

intact EBI-886936

intact EBI-1147250

intact EBI-886936

intact EBI-1147250

intact EBI-1147250

intact EBI-1147250

intact EBI-886936

intact EBI-1147250

intact EBI-1147250

intact EBI-1147250

intact EBI-886936

intact EBI-886936

intact EBI-1147250

intact EBI-1147250

intact EBI-1147250

intact EBI-884415

intact EBI-1136666

intact EBI-1136666

intact EBI-884415

|        |             |
|--------|-------------|
| intact | EBI-886990  |
| intact | EBI-1136666 |
| intact | EBI-884415  |
| intact | EBI-1136666 |
| intact | EBI-884415  |
| intact | EBI-1136666 |
| intact | EBI-884415  |
| intact | EBI-884415  |
| intact | EBI-884415  |
| intact | EBI-886990  |
| intact | EBI-1136666 |
| intact | EBI-884415  |
| intact | EBI-886990  |
| intact | EBI-884415  |
| intact | EBI-1136666 |
| intact | EBI-884415  |
| intact | EBI-1136666 |
| intact | EBI-1136666 |
| intact | EBI-884415  |
| intact | EBI-1136666 |
| intact | EBI-1136666 |
| intact | EBI-884415  |
| intact | EBI-1136666 |
| intact | EBI-884415  |
| intact | EBI-884415  |
| intact | EBI-1136666 |
| intact | EBI-886990  |
| intact | EBI-1136666 |
| intact | EBI-1146061 |
| intact | EBI-893820  |
| intact | EBI-888455  |

|        |             |
|--------|-------------|
| intact | EBI-1146061 |
| intact | EBI-893820  |
| intact | EBI-888455  |
| intact | EBI-1146061 |
| intact | EBI-1212221 |
| intact | EBI-1212144 |
| intact | EBI-1212221 |
| intact | EBI-1212144 |
| intact | EBI-1212221 |
| intact | EBI-893820  |
| intact | EBI-1146061 |
| intact | EBI-1212221 |

|        |             |
|--------|-------------|
| intact | EBI-1139975 |
| intact | EBI-887830  |
| intact | EBI-1139975 |
| intact | EBI-887830  |
| intact | EBI-893831  |

|        |             |
|--------|-------------|
| intact | EBI-1141506 |
| intact | EBI-1141506 |
| intact | EBI-1141506 |
| intact | EBI-894157  |
| intact | EBI-1141506 |
| intact | EBI-1141506 |
| intact | EBI-894157  |
| intact | EBI-894157  |
| intact | EBI-1141506 |
| intact | EBI-894157  |
| intact | EBI-1141506 |

|        |             |
|--------|-------------|
| intact | EBI-1140079 |
| intact | EBI-1140079 |
| intact | EBI-1140079 |

|        |             |
|--------|-------------|
| intact | EBI-1147500 |
|--------|-------------|

|        |             |
|--------|-------------|
| intact | EBI-885024  |
| intact | EBI-879997  |
| intact | EBI-1136403 |
| intact | EBI-1136403 |
| intact | EBI-885024  |
| intact | EBI-879997  |
| intact | EBI-885024  |
| intact | EBI-1136403 |
| intact | EBI-1136403 |
| intact | EBI-879997  |
| intact | EBI-885024  |
| intact | EBI-885024  |

|        |            |
|--------|------------|
| intact | EBI-888958 |
| intact | EBI-881486 |
| intact | EBI-888958 |
| intact | EBI-881486 |
| intact | EBI-888958 |
| intact | EBI-881486 |
| intact | EBI-881486 |
| intact | EBI-881486 |
| intact | EBI-888958 |
| intact | EBI-881486 |
| intact | EBI-888958 |
| intact | EBI-881486 |
| intact | EBI-881486 |
| intact | EBI-888958 |
| intact | EBI-881486 |
| intact | EBI-881486 |
| intact | EBI-881486 |

|        |            |
|--------|------------|
| intact | EBI-881486 |
| intact | EBI-888958 |
| intact | EBI-881486 |
| intact | EBI-888958 |
| intact | EBI-888958 |
| intact | EBI-881486 |
| intact | EBI-888958 |
| intact | EBI-881486 |
| intact | EBI-888958 |
| intact | EBI-881486 |
| intact | EBI-881486 |
| intact | EBI-881486 |
| intact | EBI-888958 |
| intact | EBI-881486 |
| intact | EBI-888958 |
| intact | EBI-881486 |
| intact | EBI-881486 |
| intact | EBI-888958 |
| intact | EBI-881486 |
| intact | EBI-888958 |
| intact | EBI-881486 |
| intact | EBI-888958 |
| intact | EBI-881486 |
| intact | EBI-888958 |
| intact | EBI-881486 |
| intact | EBI-881486 |
| intact | EBI-881486 |
| intact | EBI-888958 |



|        |             |
|--------|-------------|
| intact | EBI-881486  |
| intact | EBI-888958  |
| intact | EBI-881486  |
| intact | EBI-881486  |
| intact | EBI-880244  |
| intact | EBI-883708  |
| intact | EBI-1145366 |
| intact | EBI-1135751 |
| intact | EBI-1147952 |
| intact | EBI-1147944 |
| intact | EBI-1147944 |
| intact | EBI-1147944 |
| intact | EBI-1147958 |
| intact | EBI-889953  |
| intact | EBI-894868  |
| intact | EBI-1145894 |
| intact | EBI-1138895 |
| intact | EBI-1035546 |
| intact | EBI-1035563 |
| intact | EBI-1213174 |
| intact | EBI-1035546 |
| intact | EBI-1035563 |



|        |             |
|--------|-------------|
| intact | EBI-887858  |
| intact | EBI-1145744 |
| intact | EBI-1145744 |
| intact | EBI-1145744 |
| intact | EBI-881035  |

|        |             |
|--------|-------------|
| intact | EBI-883621  |
| intact | EBI-1774733 |
| intact | EBI-2115441 |
| intact | EBI-2116071 |
| intact | EBI-2271845 |
| intact | EBI-883621  |
| intact | EBI-1774733 |
| intact | EBI-883621  |
| intact | EBI-883621  |
| intact | EBI-1135319 |
| intact | EBI-883621  |
| intact | EBI-883621  |
| intact | EBI-883621  |
| intact | EBI-1135319 |
| intact | EBI-883621  |
| intact | EBI-1135319 |
| intact | EBI-883621  |
| intact | EBI-890903  |
| intact | EBI-890903  |
| intact | EBI-883621  |
| intact | EBI-890903  |
| intact | EBI-883621  |
| intact | EBI-883621  |

|        |            |
|--------|------------|
| intact | EBI-890903 |
| intact | EBI-883621 |
| intact | EBI-883621 |
| intact | EBI-890903 |
| intact | EBI-883621 |
| intact | EBI-883621 |
| intact | EBI-883621 |

|        |             |
|--------|-------------|
| intact | EBI-883577  |
| intact | EBI-890853  |
| intact | EBI-890853  |
| intact | EBI-890853  |
| intact | EBI-883577  |
| intact | EBI-890853  |
| intact | EBI-890853  |
| intact | EBI-906851  |
| intact | EBI-890853  |
| intact | EBI-883577  |
| intact | EBI-906851  |
| intact | EBI-890853  |
| intact | EBI-890853  |
| intact | EBI-1135316 |
| intact | EBI-890853  |
| intact | EBI-883577  |
| intact | EBI-890853  |
| intact | EBI-890853  |
| intact | EBI-883577  |
| intact | EBI-890853  |
| intact | EBI-890853  |
| intact | EBI-890853  |
| intact | EBI-883577  |
| intact | EBI-890853  |
| intact | EBI-890853  |
| intact | EBI-890853  |
| intact | EBI-883577  |
| intact | EBI-890853  |
| intact | EBI-883577  |
| intact | EBI-1771500 |
| intact | EBI-890853  |
| intact | EBI-883577  |
| intact | EBI-890853  |

intact EBI-1139971  
intact EBI-1139971

intact EBI-1031818  
intact EBI-1031829

intact EBI-885194  
intact EBI-891956  
intact EBI-885194  
intact EBI-891956  
intact EBI-885194  
intact EBI-885194  
intact EBI-885194  
intact EBI-891956  
intact EBI-1138083  
intact EBI-891956

intact EBI-880291  
intact EBI-1136539  
intact EBI-1136539  
intact EBI-880291  
intact EBI-1136539  
intact EBI-880291  
intact EBI-1136539  
intact EBI-1136539  
intact EBI-880291  
intact EBI-880291  
intact EBI-880291  
intact EBI-880291  
intact EBI-880291  
intact EBI-880291  
intact EBI-1136539  
intact EBI-880291  
intact EBI-880291

|        |             |
|--------|-------------|
| intact | EBI-1029868 |
| intact | EBI-887996  |
| intact | EBI-887996  |
| intact | EBI-893622  |
| intact | EBI-906856  |
| intact | EBI-1770950 |
| intact | EBI-906856  |
| intact | EBI-887996  |
| intact | EBI-1770950 |
| intact | EBI-893622  |
| intact | EBI-887996  |
| intact | EBI-1145597 |
| intact | EBI-1145597 |
| intact | EBI-893622  |
| intact | EBI-1145597 |
| intact | EBI-893622  |
| intact | EBI-1145597 |
| intact | EBI-893622  |
| intact | EBI-893622  |

|        |             |
|--------|-------------|
| intact | EBI-887539  |
| intact | EBI-1135775 |
| intact | EBI-887539  |
| intact | EBI-301213  |
| intact | EBI-906617  |
| intact | EBI-887539  |
| intact | EBI-880968  |
| intact | EBI-887539  |
| intact | EBI-887539  |

|        |             |
|--------|-------------|
| intact | EBI-894882  |
| intact | EBI-889981  |
| intact | EBI-1145593 |
| intact | EBI-1145593 |
| intact | EBI-894882  |

|        |            |
|--------|------------|
| intact | EBI-889981 |
| intact | EBI-889981 |
| intact | EBI-894882 |
| intact | EBI-889981 |
| intact | EBI-894882 |

|        |             |
|--------|-------------|
| intact | EBI-1142392 |

|        |             |
|--------|-------------|
| intact | EBI-1139166 |

|        |             |
|--------|-------------|
| intact | EBI-1143906 |
| intact | EBI-880413  |
| intact | EBI-885840  |
| intact | EBI-880413  |
| intact | EBI-1770991 |
| intact | EBI-1143906 |
| intact | EBI-1143906 |
| intact | EBI-885840  |
| intact | EBI-880413  |
| intact | EBI-885840  |
| intact | EBI-1143906 |
| intact | EBI-880413  |

|        |             |
|--------|-------------|
| intact | EBI-885840  |
| intact | EBI-1169650 |
| intact | EBI-1169664 |
| intact | EBI-885840  |
| intact | EBI-880413  |
| intact | EBI-1143906 |
| intact | EBI-1143906 |
| intact | EBI-880413  |
| intact | EBI-1143906 |

|        |             |
|--------|-------------|
| intact | EBI-1145339 |
|--------|-------------|

|        |             |
|--------|-------------|
| intact | EBI-1142885 |

|        |             |
|--------|-------------|
| intact | EBI-887293  |
| intact | EBI-1138471 |
| intact | EBI-893249  |
| intact | EBI-887293  |
| intact | EBI-887293  |
| intact | EBI-887293  |
| intact | EBI-1138471 |
| intact | EBI-887293  |
| intact | EBI-887293  |
| intact | EBI-887293  |
| intact | EBI-1138471 |
| intact | EBI-1138471 |
| intact | EBI-887293  |
| intact | EBI-887293  |
| intact | EBI-893249  |
| intact | EBI-887293  |
| intact | EBI-1138471 |
| intact | EBI-887293  |
| intact | EBI-887293  |
| intact | EBI-1138471 |



|        |             |
|--------|-------------|
| intact | EBI-1138471 |
| intact | EBI-1138471 |
| intact | EBI-1142565 |
| intact | EBI-1138831 |
| intact | EBI-1138831 |
| intact | EBI-893240  |
| intact | EBI-1138841 |
| intact | EBI-893240  |
| intact | EBI-887268  |
| intact | EBI-1138841 |
| intact | EBI-1138835 |
| intact | EBI-1138826 |
| intact | EBI-1138826 |
| intact | EBI-1138826 |
| intact | EBI-887392  |
| intact | EBI-893265  |
| intact | EBI-887148  |
| intact | EBI-887148  |
| intact | EBI-1135815 |
| intact | EBI-887148  |
| intact | EBI-887148  |

|        |             |
|--------|-------------|
| intact | EBI-887148  |
| intact | EBI-1135815 |

|        |             |
|--------|-------------|
| intact | EBI-1146889 |

|        |             |
|--------|-------------|
| intact | EBI-1139936 |
| intact | EBI-884342  |

|        |             |
|--------|-------------|
| intact | EBI-879752  |
| intact | EBI-884342  |
| intact | EBI-879752  |
| intact | EBI-879752  |
| intact | EBI-1139936 |

|        |             |
|--------|-------------|
| intact | EBI-1146913 |
| intact | EBI-1146913 |
| intact | EBI-906693  |
| intact | EBI-1146913 |
| intact | EBI-1146913 |

|        |             |
|--------|-------------|
| intact | EBI-1143120 |

|        |             |
|--------|-------------|
| intact | EBI-2370618 |
| intact | EBI-2370522 |

|        |             |
|--------|-------------|
| intact | EBI-1785808 |
| intact | EBI-1785808 |
| intact | EBI-1785905 |
| intact | EBI-2679321 |
| intact | EBI-1785808 |
| intact | EBI-1785905 |
| intact | EBI-2679321 |
| intact | EBI-1033486 |
| intact | EBI-1033496 |
| intact | EBI-1028030 |
| intact | EBI-1785808 |
| intact | EBI-1785905 |
| intact | EBI-2679321 |

|        |             |
|--------|-------------|
| intact | EBI-887368  |
| intact | EBI-1145333 |
| intact | EBI-887368  |
| intact | EBI-1145333 |
| intact | EBI-1145333 |
| intact | EBI-887368  |
| intact | EBI-887368  |
| intact | EBI-1145333 |

|        |             |
|--------|-------------|
| intact | EBI-893366  |
| intact | EBI-893366  |
| intact | EBI-1145628 |
| intact | EBI-1145628 |
| intact | EBI-893366  |
| intact | EBI-1145628 |
| intact | EBI-893366  |
| intact | EBI-1145628 |
| intact | EBI-1145628 |

|        |            |
|--------|------------|
| intact | EBI-883674 |

|        |             |
|--------|-------------|
| intact | EBI-888637  |
| intact | EBI-888637  |
| intact | EBI-888637  |
| intact | EBI-1137688 |
| intact | EBI-888637  |
| intact | EBI-888637  |
| intact | EBI-1137688 |
| intact | EBI-888637  |

|        |             |
|--------|-------------|
| intact | EBI-1141359 |
| intact | EBI-1141359 |
| intact | EBI-2370615 |
| intact | EBI-1141359 |
| intact | EBI-1141359 |
| intact | EBI-1141359 |

|        |             |
|--------|-------------|
| intact | EBI-2370395 |
| intact | EBI-2370184 |
| intact | EBI-2370398 |

|        |             |
|--------|-------------|
| intact | EBI-2370048 |
| intact | EBI-2370090 |
| intact | EBI-2370057 |
| intact | EBI-2370051 |
| intact | EBI-2370021 |
| intact | EBI-2370060 |
| intact | EBI-2370084 |
| intact | EBI-2370081 |

|        |             |
|--------|-------------|
| intact | EBI-1145369 |

|        |             |
|--------|-------------|
| intact | EBI-1145369 |

|        |             |
|--------|-------------|
| intact | EBI-1139571 |

|        |             |
|--------|-------------|
| intact | EBI-1144675 |
|--------|-------------|

|        |             |
|--------|-------------|
| intact | EBI-1142507 |
|--------|-------------|

|        |             |
|--------|-------------|
| intact | EBI-1147570 |
| intact | EBI-1147570 |
| intact | EBI-1032969 |
| intact | EBI-1032986 |
| intact | EBI-1033003 |
| intact | EBI-1212123 |
| intact | EBI-1032969 |
| intact | EBI-1032986 |
| intact | EBI-1033003 |
| intact | EBI-1032969 |
| intact | EBI-1032986 |
| intact | EBI-1033003 |
| intact | EBI-1212123 |
| intact | EBI-1212123 |
| intact | EBI-1147570 |
| intact | EBI-1212123 |
| intact | EBI-1212123 |
| intact | EBI-881875  |
| intact | EBI-1212123 |
| intact | EBI-1147570 |

|        |            |
|--------|------------|
| intact | EBI-906749 |
|--------|------------|

|        |             |
|--------|-------------|
| intact | EBI-1146778 |

|        |             |
|--------|-------------|
| intact | EBI-1146778 |
| intact | EBI-1146778 |
| intact | EBI-891298  |
| intact | EBI-1136364 |
| intact | EBI-1136364 |
| intact | EBI-1136364 |
| intact | EBI-1136369 |
| intact | EBI-1136369 |
| intact | EBI-1214320 |
| intact | EBI-1215320 |
| intact | EBI-1214336 |
| intact | EBI-1214345 |
| intact | EBI-1214494 |
| intact | EBI-1214633 |
| intact | EBI-1214554 |
| intact | EBI-1214607 |
| intact | EBI-889279  |
| intact | EBI-1214891 |
| intact | EBI-2504348 |
| intact | EBI-889279  |
| intact | EBI-889279  |
| intact | EBI-889279  |
| intact | EBI-1135563 |
| intact | EBI-889279  |
| intact | EBI-1135563 |
| intact | EBI-889279  |
| intact | EBI-889279  |
| intact | EBI-1135563 |
| intact | EBI-889279  |
| intact | EBI-1135563 |
| intact | EBI-889279  |
| intact | EBI-889279  |

intact EBI-2012054  
intact EBI-1135563  
intact EBI-1135563  
intact EBI-1135563  
intact EBI-1029226

intact EBI-885867  
intact EBI-885867  
intact EBI-885867  
intact EBI-885867

intact EBI-1140259  
intact EBI-1140259

intact EBI-1147496  
intact EBI-1147496

intact EBI-1137685

intact EBI-1147535  
intact EBI-1147535  
intact EBI-1147535

intact EBI-888931  
intact EBI-888931  
intact EBI-890143  
intact EBI-890143  
intact EBI-888931  
intact EBI-888931  
intact EBI-888931  
intact EBI-888931  
intact EBI-888931  
intact EBI-1140784

intact EBI-1141031  
intact EBI-1141031  
intact EBI-906820  
intact EBI-906820

intact EBI-1146057  
intact EBI-1146057



intact EBI-1137880  
intact EBI-1137880  
intact EBI-1137880

intact EBI-1141725  
intact EBI-1141725

intact EBI-1137872  
intact EBI-1137872  
intact EBI-1137872

intact EBI-1141898  
intact EBI-1141898

intact EBI-880261  
intact EBI-885585  
intact EBI-880261  
intact EBI-885585  
intact EBI-880261  
intact EBI-880261

intact EBI-1141917

intact EBI-1141917  
intact EBI-1770955

intact EBI-1144247  
intact EBI-1144247

intact EBI-1144258  
intact EBI-1144258  
intact EBI-1144258  
intact EBI-1144258  
intact EBI-1144258  
intact EBI-1144258

intact EBI-1141693  
intact EBI-1141693  
intact EBI-1141693

intact EBI-1142711  
intact EBI-1142711  
intact EBI-1142711

intact EBI-882023  
intact EBI-882023  
intact EBI-882023  
intact EBI-882023  
intact EBI-882023  
intact EBI-878868  
intact EBI-882023

intact EBI-1146848  
intact EBI-1146848  
intact EBI-1146848

intact EBI-1146848  
intact EBI-1146848

intact EBI-1135754  
intact EBI-701120  
intact EBI-1135754  
intact EBI-1135754

intact EBI-1138080

intact EBI-1145859  
intact EBI-1145859

intact EBI-893481  
intact EBI-1140371  
intact EBI-1140371  
intact EBI-1140371  
intact EBI-1140371  
intact EBI-1140371  
intact EBI-1140371

|        |             |
|--------|-------------|
| intact | EBI-1140371 |

|        |             |
|--------|-------------|
| intact | EBI-1136874 |
| intact | EBI-1136874 |

|        |             |
|--------|-------------|
| intact | EBI-887922  |
| intact | EBI-1145173 |

|        |             |
|--------|-------------|
| intact | EBI-1143223 |

|        |             |
|--------|-------------|
| intact | EBI-1135932 |

|        |             |
|--------|-------------|
| intact | EBI-1138552 |

|        |             |
|--------|-------------|
| intact | EBI-1146237 |

|        |             |
|--------|-------------|
| intact | EBI-1771009 |
| intact | EBI-1137861 |
| intact | EBI-1137861 |
| intact | EBI-906876  |
| intact | EBI-1137861 |

|        |             |
|--------|-------------|
| intact | EBI-1147989 |
|--------|-------------|

|        |             |
|--------|-------------|
| intact | EBI-1146250 |
| intact | EBI-1146250 |

|        |             |
|--------|-------------|
| intact | EBI-1143352 |
| intact | EBI-884695  |
| intact | EBI-884695  |
| intact | EBI-891531  |
| intact | EBI-1143352 |
| intact | EBI-1143352 |
| intact | EBI-891531  |
| intact | EBI-884695  |
| intact | EBI-884695  |
| intact | EBI-884695  |
| intact | EBI-891531  |

|        |             |
|--------|-------------|
| intact | EBI-883047  |
| intact | EBI-1145055 |
| intact | EBI-883047  |
| intact | EBI-1145055 |
| intact | EBI-883047  |



|        |             |
|--------|-------------|
| intact | EBI-1143469 |
| intact | EBI-888219  |
| intact | EBI-1143469 |
| intact | EBI-888219  |
| intact | EBI-1143469 |
| intact | EBI-888219  |
| intact | EBI-1143469 |
| intact | EBI-888219  |
| intact | EBI-1143469 |
| intact | EBI-888219  |
| intact | EBI-1143469 |

|        |             |
|--------|-------------|
| intact | EBI-1143677 |
| intact | EBI-1143677 |

|        |             |
|--------|-------------|
| intact | EBI-1146043 |
|--------|-------------|

|        |             |
|--------|-------------|
| intact | EBI-1145586 |
|--------|-------------|

|        |             |
|--------|-------------|
| intact | EBI-1143063 |
| intact | EBI-1143063 |

|        |             |
|--------|-------------|
| intact | EBI-1142253 |
| intact | EBI-884206  |
| intact | EBI-2369736 |
| intact | EBI-884206  |
| intact | EBI-891237  |
| intact | EBI-2369477 |
| intact | EBI-2370127 |
| intact | EBI-884206  |
| intact | EBI-2370454 |

|        |             |
|--------|-------------|
| intact | EBI-884206  |
| intact | EBI-891237  |
| intact | EBI-1142253 |
| intact | EBI-884206  |
| intact | EBI-884206  |
| intact | EBI-884206  |
| intact | EBI-1142253 |
| intact | EBI-884206  |
| intact | EBI-2370532 |
| intact | EBI-2370560 |
| intact | EBI-884206  |
| intact | EBI-1142253 |
| intact | EBI-2370585 |
| intact | EBI-1142253 |
| intact | EBI-884206  |
| intact | EBI-884206  |
| intact | EBI-1142253 |
| intact | EBI-1142253 |
| intact | EBI-884206  |
| intact | EBI-884206  |

|        |             |
|--------|-------------|
| intact | EBI-884130  |
| intact | EBI-884130  |
| intact | EBI-891214  |
| intact | EBI-884130  |
| intact | EBI-891214  |
| intact | EBI-884130  |
| intact | EBI-1770964 |
| intact | EBI-884130  |
| intact | EBI-891214  |
| intact | EBI-884130  |
| intact | EBI-884130  |
| intact | EBI-891214  |
| intact | EBI-884130  |
| intact | EBI-884130  |
| intact | EBI-891214  |
| intact | EBI-884130  |

|        |             |
|--------|-------------|
| intact | EBI-1141522 |
|--------|-------------|



|        |             |
|--------|-------------|
| intact | EBI-1141522 |
| intact | EBI-1141522 |

|        |             |
|--------|-------------|
| intact | EBI-1140294 |
| intact | EBI-1140294 |
| intact | EBI-1140294 |

|        |             |
|--------|-------------|
| intact | EBI-887624  |
| intact | EBI-887624  |
| intact | EBI-887624  |
| intact | EBI-1138489 |
| intact | EBI-887624  |
| intact | EBI-887624  |
| intact | EBI-887624  |
| intact | EBI-1138489 |
| intact | EBI-887624  |
| intact | EBI-880994  |
| intact | EBI-887624  |

|        |             |
|--------|-------------|
| intact | EBI-1136394 |
| intact | EBI-1136394 |
| intact | EBI-1136394 |

|        |            |
|--------|------------|
| intact | EBI-907303 |
|--------|------------|

|        |             |
|--------|-------------|
| intact | EBI-1147629 |
| intact | EBI-1147629 |
| intact | EBI-907303  |

|        |             |
|--------|-------------|
| intact | EBI-880595  |
| intact | EBI-886556  |
| intact | EBI-886556  |
| intact | EBI-880595  |
| intact | EBI-886556  |
| intact | EBI-886556  |
| intact | EBI-880595  |
| intact | EBI-886556  |
| intact | EBI-880595  |
| intact | EBI-880595  |
| intact | EBI-886556  |
| intact | EBI-880595  |
| intact | EBI-886556  |
| intact | EBI-1147620 |
| intact | EBI-886556  |
| intact | EBI-886556  |
| intact | EBI-880595  |
| intact | EBI-1147620 |
| intact | EBI-886556  |
| intact | EBI-880595  |
| intact | EBI-886556  |
| intact | EBI-880595  |
| intact | EBI-886556  |
| intact | EBI-886556  |
| intact | EBI-886556  |
| intact | EBI-880595  |

|        |             |
|--------|-------------|
| intact | EBI-880595  |
| intact | EBI-886556  |
| intact | EBI-1147620 |
| intact | EBI-880595  |
| intact | EBI-886556  |
| intact | EBI-880595  |
| intact | EBI-886556  |
| intact | EBI-886556  |
| intact | EBI-886556  |
| intact | EBI-880595  |
| intact | EBI-886556  |
| intact | EBI-880595  |
| intact | EBI-880595  |
| intact | EBI-1147620 |
| intact | EBI-886556  |
| intact | EBI-886556  |
| intact | EBI-886556  |
| intact | EBI-880595  |
| intact | EBI-880595  |
| intact | EBI-880595  |
| intact | EBI-886556  |
| intact | EBI-880595  |
| intact | EBI-880595  |
| intact | EBI-880595  |
| intact | EBI-1147620 |
| intact | EBI-1147620 |
| intact | EBI-880595  |
| intact | EBI-1147620 |
| intact | EBI-880595  |

|        |             |
|--------|-------------|
| intact | EBI-1138875 |
| intact | EBI-1138875 |
| intact | EBI-888025  |
| intact | EBI-888025  |
| intact | EBI-888025  |
| intact | EBI-893639  |
| intact | EBI-1138875 |
| intact | EBI-1138875 |
| intact | EBI-1138875 |

|        |             |
|--------|-------------|
| intact | EBI-1138875 |
| intact | EBI-893639  |
| intact | EBI-1138875 |
| intact | EBI-893639  |

|        |             |
|--------|-------------|
| intact | EBI-1141657 |
| intact | EBI-1141657 |

|        |             |
|--------|-------------|
| intact | EBI-1141650 |
| intact | EBI-1141650 |

|        |             |
|--------|-------------|
| intact | EBI-1141644 |
| intact | EBI-1141644 |
| intact | EBI-1141644 |

|        |             |
|--------|-------------|
| intact | EBI-1146271 |
| intact | EBI-884306  |
| intact | EBI-891254  |
| intact | EBI-884306  |
| intact | EBI-884306  |
| intact | EBI-884306  |
| intact | EBI-891254  |
| intact | EBI-891254  |
| intact | EBI-884306  |
| intact | EBI-891254  |
| intact | EBI-891254  |
| intact | EBI-891254  |
| intact | EBI-884306  |
| intact | EBI-891254  |
| intact | EBI-891254  |
| intact | EBI-891254  |

|        |             |
|--------|-------------|
| intact | EBI-895331  |
| intact | EBI-895331  |
| intact | EBI-1139271 |
| intact | EBI-890481  |
| intact | EBI-890481  |
| intact | EBI-890481  |
| intact | EBI-1139271 |

|        |             |
|--------|-------------|
| intact | EBI-895331  |
| intact | EBI-895331  |
| intact | EBI-890481  |
| intact | EBI-890481  |
| intact | EBI-890481  |
| intact | EBI-895331  |
| intact | EBI-1139271 |
| intact | EBI-890481  |
| intact | EBI-890481  |
| intact | EBI-895331  |
| intact | EBI-1139271 |
| intact | EBI-1139271 |
| intact | EBI-890481  |
| intact | EBI-1139271 |
| intact | EBI-890481  |

|        |            |
|--------|------------|
| intact | EBI-884859 |

|        |             |
|--------|-------------|
| intact | EBI-1143130 |

|        |             |
|--------|-------------|
| intact | EBI-1143130 |
| intact | EBI-878924  |
| intact | EBI-882104  |
| intact | EBI-1143130 |
| intact | EBI-882104  |
| intact | EBI-878924  |
| intact | EBI-1143130 |
| intact | EBI-1143130 |
| intact | EBI-1143130 |
| intact | EBI-882104  |
| intact | EBI-1143130 |
| intact | EBI-1143130 |
| intact | EBI-882104  |
| intact | EBI-1143130 |
| intact | EBI-878924  |
| intact | EBI-882104  |
| intact | EBI-882104  |
| intact | EBI-1143130 |

|        |            |
|--------|------------|
| intact | EBI-888653 |
| intact | EBI-888653 |
| intact | EBI-881279 |
| intact | EBI-888653 |

|        |             |
|--------|-------------|
| intact | EBI-1145795 |
| intact | EBI-888700  |
| intact | EBI-1145795 |
| intact | EBI-1145795 |
| intact | EBI-1145795 |
| intact | EBI-888700  |
| intact | EBI-888700  |
| intact | EBI-888700  |
| intact | EBI-1145795 |
| intact | EBI-888700  |
| intact | EBI-888700  |

|        |             |
|--------|-------------|
| intact | EBI-1145795 |
| intact | EBI-888700  |
| intact | EBI-888700  |
| intact | EBI-888700  |
| intact | EBI-881287  |
| intact | EBI-888700  |
| intact | EBI-1145795 |
| intact | EBI-888700  |
| intact | EBI-888700  |
| intact | EBI-1145795 |
| intact | EBI-888700  |
| intact | EBI-888700  |
| intact | EBI-888700  |

|        |             |
|--------|-------------|
| intact | EBI-886932  |
| intact | EBI-880782  |
| intact | EBI-886932  |
| intact | EBI-880782  |
| intact | EBI-886932  |
| intact | EBI-880782  |
| intact | EBI-886932  |
| intact | EBI-880782  |
| intact | EBI-886932  |
| intact | EBI-880782  |
| intact | EBI-886932  |
| intact | EBI-880782  |
| intact | EBI-880782  |
| intact | EBI-880782  |
| intact | EBI-2585258 |
| intact | EBI-886932  |
| intact | EBI-1030801 |
| intact | EBI-1030812 |
| intact | EBI-1032379 |
| intact | EBI-1032389 |
| intact | EBI-2585246 |
| intact | EBI-886932  |
| intact | EBI-880782  |

|        |             |
|--------|-------------|
| intact | EBI-880782  |
| intact | EBI-886932  |
| intact | EBI-880782  |
| intact | EBI-880782  |
| intact | EBI-886932  |
| intact | EBI-880782  |
| intact | EBI-886932  |
| intact | EBI-880782  |
| intact | EBI-2506597 |
| intact | EBI-886932  |
| intact | EBI-886932  |
| intact | EBI-880782  |

|        |             |
|--------|-------------|
| intact | EBI-886859  |
| intact | EBI-880750  |
| intact | EBI-880750  |
| intact | EBI-886859  |
| intact | EBI-880750  |
| intact | EBI-2585242 |
| intact | EBI-1147088 |
| intact | EBI-880750  |
| intact | EBI-1147088 |
| intact | EBI-880750  |
| intact | EBI-880750  |
| intact | EBI-886859  |
| intact | EBI-880750  |
| intact | EBI-886859  |
| intact | EBI-886859  |
| intact | EBI-886859  |
| intact | EBI-880750  |
| intact | EBI-886859  |
| intact | EBI-886859  |
| intact | EBI-880750  |



|        |             |
|--------|-------------|
| intact | EBI-886859  |
| intact | EBI-886859  |
| intact | EBI-880750  |
| intact | EBI-880750  |
| intact | EBI-880750  |
| intact | EBI-886859  |
| intact | EBI-880750  |
| intact | EBI-1147088 |
| intact | EBI-1147088 |
| intact | EBI-1147088 |
| intact | EBI-886859  |
| intact | EBI-886859  |

|        |             |
|--------|-------------|
| intact | EBI-1136800 |
| intact | EBI-894374  |
| intact | EBI-889372  |
| intact | EBI-894374  |

|        |             |
|--------|-------------|
| intact | EBI-1144514 |

|        |             |
|--------|-------------|
| intact | EBI-1147874 |
| intact | EBI-1147874 |

|        |             |
|--------|-------------|
| intact | EBI-1147874 |
| intact | EBI-1147874 |
| intact | EBI-885803  |
| intact | EBI-892341  |
| intact | EBI-1147301 |
| intact | EBI-892341  |
| intact | EBI-1138992 |
| intact | EBI-1138266 |
| intact | EBI-1138266 |
| intact | EBI-1138266 |
| intact | EBI-1144996 |
| intact | EBI-1144996 |
| intact | EBI-1144996 |
| intact | EBI-894820  |
| intact | EBI-1144996 |
| intact | EBI-1144996 |
| intact | EBI-1144996 |
| intact | EBI-894820  |
| intact | EBI-894820  |
| intact | EBI-1144996 |
| intact | EBI-894820  |
| intact | EBI-1144996 |
| intact | EBI-1144996 |
| intact | EBI-889882  |
| intact | EBI-1144996 |



|        |            |
|--------|------------|
| intact | EBI-883484 |

|        |             |
|--------|-------------|
| intact | EBI-1038181 |
| intact | EBI-1040048 |

|        |            |
|--------|------------|
| intact | EBI-894562 |
| intact | EBI-889553 |
| intact | EBI-889553 |
| intact | EBI-894562 |

|        |             |
|--------|-------------|
| intact | EBI-894403  |
| intact | EBI-894403  |
| intact | EBI-894403  |
| intact | EBI-889390  |
| intact | EBI-1147698 |
| intact | EBI-1147698 |
| intact | EBI-889390  |
| intact | EBI-889390  |
| intact | EBI-889390  |
| intact | EBI-1147698 |
| intact | EBI-889390  |
| intact | EBI-894403  |
| intact | EBI-1147698 |
| intact | EBI-1147698 |
| intact | EBI-1147698 |
| intact | EBI-894403  |
| intact | EBI-894403  |

|        |            |
|--------|------------|
| intact | EBI-894403 |
| intact | EBI-889390 |
| intact | EBI-894403 |
| intact | EBI-889390 |
| intact | EBI-894403 |
| intact | EBI-894403 |
| intact | EBI-894403 |

|        |             |
|--------|-------------|
| intact | EBI-1143152 |
| intact | EBI-767046  |
| intact | EBI-767059  |
| intact | EBI-1143152 |
| intact | EBI-1143152 |
| intact | EBI-1143160 |
| intact | EBI-1143160 |
| intact | EBI-887896  |
| intact | EBI-887896  |
| intact | EBI-1143160 |
| intact | EBI-1143160 |
| intact | EBI-893577  |
| intact | EBI-1143160 |
| intact | EBI-1143160 |
| intact | EBI-604068  |
| intact | EBI-887896  |
| intact | EBI-893577  |
| intact | EBI-887896  |
| intact | EBI-1143160 |
| intact | EBI-893577  |
| intact | EBI-1143160 |

|        |             |
|--------|-------------|
| intact | EBI-1143812 |
| intact | EBI-888016  |
| intact | EBI-893838  |
| intact | EBI-881071  |
| intact | EBI-888016  |
| intact | EBI-1143812 |
| intact | EBI-1143812 |

|        |             |
|--------|-------------|
| intact | EBI-1142089 |
| intact | EBI-1142089 |

|        |             |
|--------|-------------|
| intact | EBI-1147000 |

|        |             |
|--------|-------------|
| intact | EBI-1136803 |
| intact | EBI-1136803 |
| intact | EBI-1136803 |
| intact | EBI-888368  |
| intact | EBI-893785  |

|        |             |
|--------|-------------|
| intact | EBI-1147123 |

|        |             |
|--------|-------------|
| intact | EBI-1146265 |

|        |             |
|--------|-------------|
| intact | EBI-888863  |
| intact | EBI-888863  |
| intact | EBI-1138355 |
| intact | EBI-888863  |
| intact | EBI-888863  |
| intact | EBI-881333  |
| intact | EBI-1138355 |
| intact | EBI-888863  |

|        |            |
|--------|------------|
| intact | EBI-888863 |

|        |             |
|--------|-------------|
| intact | EBI-1145130 |
| intact | EBI-1145130 |

|        |             |
|--------|-------------|
| intact | EBI-1146400 |

|        |             |
|--------|-------------|
| intact | EBI-1135297 |
| intact | EBI-1135297 |

|        |             |
|--------|-------------|
| intact | EBI-1139177 |
| intact | EBI-906838  |

|        |             |
|--------|-------------|
| intact | EBI-1140456 |

|        |            |
|--------|------------|
| intact | EBI-894628 |
|--------|------------|





|        |             |
|--------|-------------|
| intact | EBI-1146220 |
| intact | EBI-892932  |
| intact | EBI-1146220 |
| intact | EBI-1146220 |
| intact | EBI-1146220 |
| intact | EBI-892932  |
| intact | EBI-892932  |
| intact | EBI-892932  |
| intact | EBI-1146220 |
| intact | EBI-892932  |
| intact | EBI-892932  |

|        |             |
|--------|-------------|
| intact | EBI-1136659 |
| intact | EBI-1136659 |
| intact | EBI-889577  |
| intact | EBI-894571  |
| intact | EBI-1136659 |
| intact | EBI-889577  |
| intact | EBI-894571  |
| intact | EBI-889577  |
| intact | EBI-894571  |
| intact | EBI-894571  |
| intact | EBI-889577  |
| intact | EBI-889577  |
| intact | EBI-894571  |
| intact | EBI-889577  |
| intact | EBI-889577  |
| intact | EBI-894571  |
| intact | EBI-894571  |
| intact | EBI-1136659 |
| intact | EBI-1136659 |
| intact | EBI-894571  |
| intact | EBI-894571  |

|        |             |
|--------|-------------|
| intact | EBI-985197  |
| intact | EBI-1214251 |

|        |             |
|--------|-------------|
| intact | EBI-1135819 |
| intact | EBI-892532  |
| intact | EBI-892532  |
| intact | EBI-1135819 |
| intact | EBI-892532  |

|        |             |
|--------|-------------|
| intact | EBI-892532  |
| intact | EBI-892532  |
| intact | EBI-1135819 |
| intact | EBI-892532  |
| intact | EBI-892532  |
| intact | EBI-1135819 |
| intact | EBI-892532  |
| intact | EBI-892532  |
| intact | EBI-1135819 |
| intact | EBI-1135819 |
| intact | EBI-892532  |
| intact | EBI-1135819 |
| intact | EBI-892532  |
| intact | EBI-892532  |
| intact | EBI-892532  |
| intact | EBI-1135819 |
| intact | EBI-1135819 |
| intact | EBI-892532  |
| intact | EBI-1135819 |
| intact | EBI-1135819 |
| intact | EBI-892532  |
| intact | EBI-1135819 |
| intact | EBI-1135819 |

|        |             |
|--------|-------------|
| intact | EBI-1135833 |
| intact | EBI-892581  |
| intact | EBI-886035  |
| intact | EBI-1135833 |
| intact | EBI-892581  |
| intact | EBI-892581  |
| intact | EBI-892581  |

intact EBI-892581  
intact EBI-892581  
intact EBI-1135833

intact EBI-892599  
intact EBI-892599  
intact EBI-892599  
intact EBI-886059  
intact EBI-892599  
intact EBI-892599  
intact EBI-1135798  
intact EBI-892599  
intact EBI-886059  
intact EBI-1135798  
intact EBI-1135798  
intact EBI-886059  
intact EBI-886059  
intact EBI-1135798  
intact EBI-892599  
intact EBI-892599  
intact EBI-892599  
intact EBI-886059  
intact EBI-892599  
intact EBI-1135798  
intact EBI-892599  
intact EBI-886059  
intact EBI-1135798  
intact EBI-892599  
intact EBI-892599  
intact EBI-886059  
intact EBI-892599  
intact EBI-892599  
intact EBI-892599  
intact EBI-892599  
intact EBI-892599  
intact EBI-886059  
intact EBI-1135798  
intact EBI-892599  
intact EBI-892599  
intact EBI-886059  
intact EBI-1135798  
intact EBI-886059  
intact EBI-892599  
intact EBI-1135798  
intact EBI-892599

|        |             |
|--------|-------------|
| intact | EBI-1135798 |
| intact | EBI-892599  |
| intact | EBI-892599  |
| intact | EBI-1135798 |
| intact | EBI-892599  |
| intact | EBI-886059  |
| intact | EBI-892599  |
| intact | EBI-892599  |
| intact | EBI-886059  |
| intact | EBI-1135798 |
| intact | EBI-892599  |
| intact | EBI-886059  |
| intact | EBI-1135798 |
| intact | EBI-892599  |
| intact | EBI-886059  |
| intact | EBI-892599  |
| intact | EBI-886059  |
| intact | EBI-1135798 |
| intact | EBI-892599  |
| intact | EBI-1135798 |
| intact | EBI-886059  |
| intact | EBI-886059  |
| intact | EBI-886059  |
| intact | EBI-892599  |
| intact | EBI-892599  |
| intact | EBI-892599  |

|        |             |
|--------|-------------|
| intact | EBI-1138286 |
| intact | EBI-1138286 |

|        |             |
|--------|-------------|
| intact | EBI-1138216 |
|--------|-------------|

|        |             |
|--------|-------------|
| intact | EBI-1143673 |
| intact | EBI-889967  |
| intact | EBI-1143673 |

|        |             |
|--------|-------------|
| intact | EBI-1137152 |
|--------|-------------|

|        |             |
|--------|-------------|
| intact | EBI-1144129 |
|--------|-------------|

|        |            |
|--------|------------|
| intact | EBI-879887 |

|        |             |
|--------|-------------|
| intact | EBI-1140263 |
| intact | EBI-892424  |
| intact | EBI-1140263 |
| intact | EBI-1140263 |
| intact | EBI-892424  |
| intact | EBI-892424  |
| intact | EBI-1140263 |
| intact | EBI-892424  |
| intact | EBI-1140263 |

|        |             |
|--------|-------------|
| intact | EBI-1147286 |
|--------|-------------|

|        |             |
|--------|-------------|
| intact | EBI-1771504 |
|--------|-------------|

|        |             |
|--------|-------------|
| intact | EBI-1144586 |
| intact | EBI-1144586 |

|        |             |
|--------|-------------|
| intact | EBI-1145248 |
| intact | EBI-1145248 |
| intact | EBI-1771534 |
| intact | EBI-1771534 |
| intact | EBI-1771534 |

|        |             |
|--------|-------------|
| intact | EBI-1213360 |
| intact | EBI-1213360 |

|        |             |
|--------|-------------|
| intact | EBI-884495  |
| intact | EBI-891396  |
| intact | EBI-1142375 |
| intact | EBI-1142375 |
| intact | EBI-891396  |

|        |             |
|--------|-------------|
| intact | EBI-1146747 |

|        |             |
|--------|-------------|
| intact | EBI-1147304 |

|        |             |
|--------|-------------|
| intact | EBI-1144372 |
| intact | EBI-1144372 |
| intact | EBI-889076  |
| intact | EBI-881611  |
| intact | EBI-881611  |
| intact | EBI-889076  |
| intact | EBI-881611  |
| intact | EBI-1144372 |
| intact | EBI-2369513 |
| intact | EBI-2370142 |
| intact | EBI-2370442 |
| intact | EBI-2370093 |
| intact | EBI-1144372 |
| intact | EBI-881611  |
| intact | EBI-1144372 |
| intact | EBI-1144372 |
| intact | EBI-881611  |
| intact | EBI-881611  |

|        |             |
|--------|-------------|
| intact | EBI-881611  |
| intact | EBI-1144372 |
| intact | EBI-881611  |
| intact | EBI-2369443 |
| intact | EBI-1144372 |

|        |             |
|--------|-------------|
| intact | EBI-1135924 |
|--------|-------------|

|        |             |
|--------|-------------|
| intact | EBI-1138903 |
| intact | EBI-893742  |
| intact | EBI-1138903 |
| intact | EBI-893742  |

|        |             |
|--------|-------------|
| intact | EBI-1137637 |
| intact | EBI-1137637 |
| intact | EBI-879008  |
| intact | EBI-882228  |
| intact | EBI-882228  |
| intact | EBI-879008  |
| intact | EBI-1137637 |
| intact | EBI-1137637 |
| intact | EBI-879008  |
| intact | EBI-879008  |
| intact | EBI-1137637 |
| intact | EBI-1137637 |

|        |             |
|--------|-------------|
| intact | EBI-1139075 |

|        |             |
|--------|-------------|
| intact | EBI-1139067 |
| intact | EBI-1139067 |
| intact | EBI-1139067 |

intact EBI-1139067  
intact EBI-1139067  
intact EBI-1139067

intact EBI-1145123  
intact EBI-1145123

intact EBI-1136026  
intact EBI-1136026

intact EBI-1137840  
intact EBI-1137840  
intact EBI-1137840  
intact EBI-1137840

intact EBI-1137834  
intact EBI-1137834  
intact EBI-1137834  
intact EBI-1137834

intact EBI-1138978  
intact EBI-1138978

intact EBI-882483  
intact EBI-890053  
intact EBI-1137952  
intact EBI-1137952  
intact EBI-882483  
intact EBI-890053  
intact EBI-1137952  
intact EBI-1137952  
intact EBI-890053  
intact EBI-890053  
intact EBI-890053  
intact EBI-1137952  
intact EBI-1137952

intact EBI-1137960  
intact EBI-1137960



|        |             |
|--------|-------------|
| intact | EBI-1138140 |
| intact | EBI-884476  |
| intact | EBI-1138140 |
| intact | EBI-2023957 |
| intact | EBI-2012429 |
| intact | EBI-2012449 |
| intact | EBI-2012567 |
| intact | EBI-2012399 |
| intact | EBI-1138140 |
| intact | EBI-1141967 |
| intact | EBI-1147706 |
| intact | EBI-1143661 |
| intact | EBI-1135529 |
| intact | EBI-2369510 |
| intact | EBI-2369974 |
| intact | EBI-1135529 |
| intact | EBI-2369425 |
| intact | EBI-888239  |
| intact | EBI-893751  |
| intact | EBI-888239  |
| intact | EBI-888239  |
| intact | EBI-893751  |
| intact | EBI-888239  |
| intact | EBI-893751  |
| intact | EBI-888239  |

|        |            |
|--------|------------|
| intact | EBI-888239 |
| intact | EBI-893751 |
| intact | EBI-888239 |
| intact | EBI-888239 |
| intact | EBI-893751 |
| intact | EBI-888239 |
| intact | EBI-893751 |
| intact | EBI-888239 |
| intact | EBI-893751 |
| intact | EBI-888239 |
| intact | EBI-888239 |
| intact | EBI-893751 |
| intact | EBI-888239 |
| intact | EBI-888239 |
| intact | EBI-893751 |
| intact | EBI-888239 |
| intact | EBI-888239 |
| intact | EBI-893751 |

|        |             |
|--------|-------------|
| intact | EBI-1141957 |



|        |             |
|--------|-------------|
| intact | EBI-1138371 |
| intact | EBI-894643  |
| intact | EBI-889696  |
| intact | EBI-894643  |
| intact | EBI-889696  |
| intact | EBI-1186995 |
| intact | EBI-2213576 |
| intact | EBI-1138371 |

|        |             |
|--------|-------------|
| intact | EBI-894012  |
| intact | EBI-888887  |
| intact | EBI-888887  |
| intact | EBI-1145112 |
| intact | EBI-1145112 |
| intact | EBI-1145112 |
| intact | EBI-894012  |
| intact | EBI-888887  |
| intact | EBI-894012  |
| intact | EBI-1145112 |
| intact | EBI-1145112 |
| intact | EBI-894012  |
| intact | EBI-894012  |

|        |             |
|--------|-------------|
| intact | EBI-1143773 |
| intact | EBI-886447  |
| intact | EBI-1143773 |
| intact | EBI-1143773 |
| intact | EBI-765077  |

|        |             |
|--------|-------------|
| intact | EBI-887727  |
| intact | EBI-887727  |
| intact | EBI-1140662 |

|        |             |
|--------|-------------|
| intact | EBI-1137661 |

|        |             |
|--------|-------------|
| intact | EBI-1145187 |
| intact | EBI-1145187 |
| intact | EBI-1145187 |

|        |             |
|--------|-------------|
| intact | EBI-880367  |
| intact | EBI-1041511 |
| intact | EBI-1041525 |
| intact | EBI-1041539 |
| intact | EBI-1041553 |
| intact | EBI-1037008 |
| intact | EBI-1038777 |
| intact | EBI-1041511 |
| intact | EBI-1041525 |
| intact | EBI-1041539 |
| intact | EBI-1041553 |
| intact | EBI-1037008 |
| intact | EBI-1038777 |
| intact | EBI-880367  |
| intact | EBI-885808  |
| intact | EBI-880367  |
| intact | EBI-880367  |
| intact | EBI-1139222 |

|        |             |
|--------|-------------|
| intact | EBI-880342  |
| intact | EBI-885754  |
| intact | EBI-1139225 |
| intact | EBI-906696  |
| intact | EBI-880342  |
| intact | EBI-885754  |
| intact | EBI-906956  |
| intact | EBI-1139225 |

|        |             |
|--------|-------------|
| intact | EBI-880352  |
| intact | EBI-1139229 |
| intact | EBI-885776  |
| intact | EBI-880352  |
| intact | EBI-885776  |
| intact | EBI-880352  |
| intact | EBI-885776  |
| intact | EBI-885776  |
| intact | EBI-885776  |
| intact | EBI-880352  |
| intact | EBI-885776  |
| intact | EBI-880352  |

|        |             |
|--------|-------------|
| intact | EBI-1139219 |
|--------|-------------|

|        |             |
|--------|-------------|
| intact | EBI-1142149 |
| intact | EBI-1142149 |

|        |             |
|--------|-------------|
| intact | EBI-1138188 |
|--------|-------------|

|        |             |
|--------|-------------|
| intact | EBI-1145830 |

|        |             |
|--------|-------------|
| intact | EBI-1135324 |
|--------|-------------|

|        |             |
|--------|-------------|
| intact | EBI-2369682 |
| intact | EBI-2369659 |
| intact | EBI-2369645 |
| intact | EBI-2369679 |
| intact | EBI-2369641 |
| intact | EBI-2369596 |
| intact | EBI-2369648 |

intact EBI-1147636

intact EBI-2012351

intact EBI-1141105

intact EBI-893969

intact EBI-893969

intact EBI-1141105

intact EBI-893969

intact EBI-1141105

intact EBI-1141105

intact EBI-1142937

intact EBI-906816

intact EBI-1213235

intact EBI-1142426

intact EBI-1142426

intact EBI-1142426

intact EBI-1142426

intact EBI-1142426

intact EBI-1145014

intact EBI-1145014

intact EBI-886823

intact EBI-1145014

intact EBI-893117

intact EBI-886823

intact EBI-1145014

|        |             |
|--------|-------------|
| intact | EBI-893117  |
| intact | EBI-893117  |
| intact | EBI-886823  |
| intact | EBI-893117  |
| intact | EBI-1145014 |
| intact | EBI-886823  |
| intact | EBI-886823  |
| intact | EBI-1145014 |
| intact | EBI-1145014 |
| intact | EBI-893117  |
| intact | EBI-1145014 |
| intact | EBI-886823  |
| intact | EBI-1145014 |
| intact | EBI-893117  |
| intact | EBI-886823  |
| intact | EBI-893117  |
| intact | EBI-886823  |
| intact | EBI-886823  |
| intact | EBI-1145014 |
| intact | EBI-1145014 |
| intact | EBI-886823  |
| intact | EBI-893117  |
| intact | EBI-886823  |
| intact | EBI-893117  |
| intact | EBI-886823  |
| intact | EBI-1145014 |
| intact | EBI-893117  |
| intact | EBI-886823  |
| intact | EBI-1145014 |
| intact | EBI-886823  |
| intact | EBI-1145014 |
| intact | EBI-893117  |
| intact | EBI-1145014 |
| intact | EBI-886823  |
| intact | EBI-1145014 |
| intact | EBI-1145014 |
| intact | EBI-893117  |
| intact | EBI-893117  |
| intact | EBI-1145014 |
| intact | EBI-1136512 |



|        |             |
|--------|-------------|
| intact | EBI-1136512 |
| intact | EBI-1136512 |
| intact | EBI-886789  |
| intact | EBI-886789  |
| intact | EBI-886789  |
| intact | EBI-1136512 |
| intact | EBI-886789  |
| intact | EBI-886789  |
| intact | EBI-886789  |
| intact | EBI-1136512 |
| intact | EBI-1136512 |
| intact | EBI-1136512 |

|        |             |
|--------|-------------|
| intact | EBI-880717  |
| intact | EBI-886788  |
| intact | EBI-880717  |
| intact | EBI-880717  |
| intact | EBI-1137802 |

|        |             |
|--------|-------------|
| intact | EBI-880739  |
| intact | EBI-880739  |
| intact | EBI-1137807 |
| intact | EBI-886840  |
| intact | EBI-1137807 |
| intact | EBI-1137807 |

|        |             |
|--------|-------------|
| intact | EBI-889144  |
| intact | EBI-1135600 |
| intact | EBI-1135600 |
| intact | EBI-1135600 |

|        |             |
|--------|-------------|
| intact | EBI-1214191 |
| intact | EBI-2463599 |

|        |             |
|--------|-------------|
| intact | EBI-1145810 |
| intact | EBI-2116569 |

intact EBI-1145810  
intact EBI-1145810

intact EBI-1146030  
intact EBI-1146030

intact EBI-1138688  
intact EBI-1138688  
intact EBI-1138688  
intact EBI-1138688

intact EBI-1139950  
intact EBI-1139950

intact EBI-1141994  
intact EBI-1141994

intact EBI-1135683  
intact EBI-1135683  
intact EBI-880983  
intact EBI-880983  
intact EBI-887604  
intact EBI-1135683  
intact EBI-887604  
intact EBI-880983

intact EBI-883350  
intact EBI-883350

|        |             |
|--------|-------------|
| intact | EBI-883350  |
| intact | EBI-890645  |
| intact | EBI-883350  |
| intact | EBI-1144556 |
| intact | EBI-890645  |
| intact | EBI-1144556 |
| intact | EBI-890645  |
| intact | EBI-1144556 |
| intact | EBI-890645  |
| intact | EBI-883350  |
| intact | EBI-890645  |
| intact | EBI-1144556 |

|        |             |
|--------|-------------|
| intact | EBI-2504669 |
| intact | EBI-2504669 |
| intact | EBI-2504721 |
| intact | EBI-2504740 |
| intact | EBI-2504762 |
| intact | EBI-2504669 |
| intact | EBI-2504669 |
| intact | EBI-2504669 |

|        |             |
|--------|-------------|
| intact | EBI-1145805 |
| intact | EBI-1145805 |
| intact | EBI-1145805 |

|        |             |
|--------|-------------|
| intact | EBI-1135589 |

|        |             |
|--------|-------------|
| intact | EBI-1142759 |
| intact | EBI-1142759 |

|        |             |
|--------|-------------|
| intact | EBI-1140332 |
| intact | EBI-1140332 |
| intact | EBI-887087  |
| intact | EBI-1143110 |
| intact | EBI-887087  |
| intact | EBI-893231  |
| intact | EBI-887128  |
| intact | EBI-887128  |
| intact | EBI-1135989 |
| intact | EBI-893231  |
| intact | EBI-1771048 |
| intact | EBI-1135989 |
| intact | EBI-1146793 |
| intact | EBI-1146793 |
| intact | EBI-887434  |
| intact | EBI-887434  |
| intact | EBI-887434  |
| intact | EBI-1138943 |
| intact | EBI-1138943 |
| intact | EBI-1138943 |
| intact | EBI-893272  |
| intact | EBI-893272  |
| intact | EBI-887434  |
| intact | EBI-1138943 |
| intact | EBI-893272  |
| intact | EBI-1138943 |
| intact | EBI-1138943 |
| intact | EBI-887434  |
| intact | EBI-887434  |
| intact | EBI-1138943 |
| intact | EBI-893272  |
| intact | EBI-1138307 |
| intact | EBI-1138307 |
| intact | EBI-1138311 |
| intact | EBI-1138311 |
| intact | EBI-890164  |
| intact | EBI-882596  |
| intact | EBI-890164  |
| intact | EBI-890164  |

|        |             |
|--------|-------------|
| intact | EBI-1138311 |
| intact | EBI-1138311 |
| intact | EBI-1770978 |
| intact | EBI-882596  |
| intact | EBI-1138311 |
| intact | EBI-1138311 |

|        |            |
|--------|------------|
| intact | EBI-890008 |

|        |             |
|--------|-------------|
| intact | EBI-1137708 |
|--------|-------------|

|        |             |
|--------|-------------|
| intact | EBI-1147461 |
|--------|-------------|

|        |             |
|--------|-------------|
| intact | EBI-1137631 |
| intact | EBI-1137631 |
| intact | EBI-893285  |
| intact | EBI-887500  |
| intact | EBI-893285  |
| intact | EBI-887500  |
| intact | EBI-887500  |
| intact | EBI-1137631 |
| intact | EBI-1137631 |
| intact | EBI-887500  |
| intact | EBI-887500  |
| intact | EBI-893285  |
| intact | EBI-887500  |
| intact | EBI-887500  |
| intact | EBI-887500  |
| intact | EBI-893285  |
| intact | EBI-887500  |
| intact | EBI-887500  |
| intact | EBI-893285  |
| intact | EBI-887500  |

|        |            |
|--------|------------|
| intact | EBI-893285 |
| intact | EBI-893285 |
| intact | EBI-893285 |
| intact | EBI-887500 |
| intact | EBI-887500 |
| intact | EBI-893285 |
| intact | EBI-893285 |
| intact | EBI-893285 |
| intact | EBI-887500 |
| intact | EBI-893285 |
| intact | EBI-887500 |
| intact | EBI-893285 |
| intact | EBI-893285 |
| intact | EBI-893285 |
| intact | EBI-887500 |
| intact | EBI-893285 |
| intact | EBI-893285 |
| intact | EBI-887500 |
| intact | EBI-893285 |
| intact | EBI-887500 |
| intact | EBI-893285 |
| intact | EBI-887500 |
| intact | EBI-893285 |
| intact | EBI-887500 |
| intact | EBI-893285 |
| intact | EBI-893285 |
| intact | EBI-893285 |
| intact | EBI-887500 |
| intact | EBI-893285 |
| intact | EBI-887500 |
| intact | EBI-893285 |
| intact | EBI-887500 |
| intact | EBI-887500 |
| intact | EBI-893285 |
| intact | EBI-893285 |
| intact | EBI-887500 |

|        |             |
|--------|-------------|
| intact | EBI-887500  |
| intact | EBI-893285  |
| intact | EBI-1138966 |
| intact | EBI-884958  |
| intact | EBI-879973  |
| intact | EBI-884958  |
| intact | EBI-879973  |
| intact | EBI-884958  |
| intact | EBI-879973  |
| intact | EBI-879973  |
| intact | EBI-884958  |
| intact | EBI-879973  |
| intact | EBI-884958  |
| intact | EBI-879973  |
| intact | EBI-884958  |
| intact | EBI-884958  |
| intact | EBI-1144172 |
| intact | EBI-1144172 |
| intact | EBI-1147715 |
| intact | EBI-1142354 |
| intact | EBI-891089  |
| intact | EBI-891089  |

|        |            |
|--------|------------|
| intact | EBI-883913 |
| intact | EBI-883913 |
| intact | EBI-883913 |
| intact | EBI-891089 |
| intact | EBI-883913 |
| intact | EBI-891089 |
| intact | EBI-883913 |
| intact | EBI-891089 |
| intact | EBI-891089 |
| intact | EBI-883913 |
| intact | EBI-891089 |
| intact | EBI-891089 |
| intact | EBI-883913 |
| intact | EBI-891089 |
| intact | EBI-883913 |
| intact | EBI-883913 |
| intact | EBI-883913 |
| intact | EBI-891089 |
| intact | EBI-883913 |
| intact | EBI-883913 |
| intact | EBI-891089 |
| intact | EBI-883913 |
| intact | EBI-891089 |
| intact | EBI-883913 |
| intact | EBI-883913 |
| intact | EBI-891089 |
| intact | EBI-883913 |
| intact | EBI-891089 |
| intact | EBI-883913 |
| intact | EBI-883913 |



|        |             |
|--------|-------------|
| intact | EBI-1137072 |
| intact | EBI-894121  |
| intact | EBI-894121  |
| intact | EBI-1137072 |
| intact | EBI-894121  |
| intact | EBI-1137072 |
| intact | EBI-894121  |
| intact | EBI-1137072 |

|        |             |
|--------|-------------|
| intact | EBI-1143050 |
| intact | EBI-1143050 |
| intact | EBI-1143050 |
| intact | EBI-889424  |
| intact | EBI-889424  |
| intact | EBI-1143050 |
| intact | EBI-1143050 |

|        |             |
|--------|-------------|
| intact | EBI-1140524 |
|--------|-------------|

|        |             |
|--------|-------------|
| intact | EBI-1136768 |

|        |             |
|--------|-------------|
| intact | EBI-1136278 |
|--------|-------------|

|        |             |
|--------|-------------|
| intact | EBI-1136278 |
| intact | EBI-1139523 |
| intact | EBI-1139523 |
| intact | EBI-887767  |
| intact | EBI-893445  |
| intact | EBI-1143395 |
| intact | EBI-893445  |
| intact | EBI-893445  |
| intact | EBI-887767  |
| intact | EBI-893445  |
| intact | EBI-887767  |
| intact | EBI-887767  |
| intact | EBI-1143395 |
| intact | EBI-893445  |
| intact | EBI-887767  |
| intact | EBI-893445  |
| intact | EBI-887767  |
| intact | EBI-887767  |
| intact | EBI-1143395 |
| intact | EBI-893445  |
| intact | EBI-893445  |
| intact | EBI-887767  |
| intact | EBI-1143395 |
| intact | EBI-1142752 |
| intact | EBI-1142480 |
| intact | EBI-881405  |
| intact | EBI-878661  |
| intact | EBI-878661  |
| intact | EBI-906842  |
| intact | EBI-1142480 |

|        |             |
|--------|-------------|
| intact | EBI-1142480 |

|        |            |
|--------|------------|
| intact | EBI-903826 |
| intact | EBI-903339 |

|        |             |
|--------|-------------|
| intact | EBI-1143708 |
| intact | EBI-1143708 |
| intact | EBI-1143708 |

|        |            |
|--------|------------|
| intact | EBI-902902 |
|--------|------------|

|        |            |
|--------|------------|
| intact | EBI-880387 |
| intact | EBI-880387 |
| intact | EBI-880387 |

|        |             |
|--------|-------------|
| intact | EBI-1140922 |
| intact | EBI-1140922 |
| intact | EBI-906771  |
| intact | EBI-906771  |
| intact | EBI-1140922 |
| intact | EBI-892376  |
| intact | EBI-892376  |
| intact | EBI-1140922 |

|        |             |
|--------|-------------|
| intact | EBI-1145157 |
|--------|-------------|

|        |            |
|--------|------------|
| intact | EBI-885650 |
| intact | EBI-880319 |
| intact | EBI-885650 |

|        |            |
|--------|------------|
| intact | EBI-880319 |
| intact | EBI-885650 |
| intact | EBI-885650 |

|        |             |
|--------|-------------|
| intact | EBI-1147633 |
|--------|-------------|

|        |             |
|--------|-------------|
| intact | EBI-1138642 |
| intact | EBI-1145664 |

|        |             |
|--------|-------------|
| intact | EBI-1143918 |

|        |             |
|--------|-------------|
| intact | EBI-884439  |
| intact | EBI-1147338 |

|        |             |
|--------|-------------|
| intact | EBI-892291  |
| intact | EBI-1136708 |
| intact | EBI-892291  |
| intact | EBI-1136708 |
| intact | EBI-892291  |
| intact | EBI-885625  |
| intact | EBI-1136708 |
| intact | EBI-892291  |
| intact | EBI-1136708 |
| intact | EBI-1136708 |
| intact | EBI-892291  |
| intact | EBI-1136708 |
| intact | EBI-892291  |
| intact | EBI-892291  |
| intact | EBI-1136708 |
| intact | EBI-892291  |

|        |             |
|--------|-------------|
| intact | EBI-893152  |
| intact | EBI-886894  |
| intact | EBI-893152  |
| intact | EBI-886894  |
| intact | EBI-886894  |
| intact | EBI-886894  |
| intact | EBI-893152  |
| intact | EBI-1144993 |

|        |             |
|--------|-------------|
| intact | EBI-1146638 |

|        |             |
|--------|-------------|
| intact | EBI-1146645 |
|--------|-------------|

|        |            |
|--------|------------|
| intact | EBI-882754 |
| intact | EBI-882754 |
| intact | EBI-882754 |
| intact | EBI-879136 |
| intact | EBI-882754 |
| intact | EBI-879136 |
| intact | EBI-882754 |
| intact | EBI-882754 |
| intact | EBI-882754 |
| intact | EBI-879136 |
| intact | EBI-882754 |
| intact | EBI-882754 |
| intact | EBI-882754 |
| intact | EBI-879136 |
| intact | EBI-882754 |
| intact | EBI-882754 |
| intact | EBI-882754 |
| intact | EBI-879136 |
| intact | EBI-882754 |

|        |             |
|--------|-------------|
| intact | EBI-882754  |
| intact | EBI-882754  |
| intact | EBI-879136  |
| intact | EBI-879136  |
| intact | EBI-882754  |
| intact | EBI-879136  |
| intact | EBI-879136  |
| intact | EBI-882754  |
| intact | EBI-882754  |
| intact | EBI-882754  |
| intact | EBI-1142206 |
| intact | EBI-882754  |
| intact | EBI-882754  |

|        |             |
|--------|-------------|
| intact | EBI-1144430 |
| intact | EBI-1144430 |
| intact | EBI-1144430 |

|        |             |
|--------|-------------|
| intact | EBI-1136445 |
|--------|-------------|

|        |             |
|--------|-------------|
| intact | EBI-1143694 |

|        |             |
|--------|-------------|
| intact | EBI-1143946 |

|        |            |
|--------|------------|
| intact | EBI-889160 |
|--------|------------|

|        |            |
|--------|------------|
| intact | EBI-889160 |

|        |            |
|--------|------------|
| intact | EBI-889228 |
| intact | EBI-889228 |
| intact | EBI-889228 |

|        |             |
|--------|-------------|
| intact | EBI-1146336 |
|--------|-------------|

|        |             |
|--------|-------------|
| intact | EBI-1146274 |

|        |             |
|--------|-------------|
| intact | EBI-1146349 |

|        |             |
|--------|-------------|
| intact | EBI-1146342 |

|        |             |
|--------|-------------|
| intact | EBI-1146674 |
|--------|-------------|







|        |             |
|--------|-------------|
| intact | EBI-1138150 |
| intact | EBI-1138150 |
| intact | EBI-881698  |
| intact | EBI-881698  |
| intact | EBI-882361  |
| intact | EBI-1140409 |
| intact | EBI-1140409 |
| intact | EBI-1140409 |
| intact | EBI-1147174 |
| intact | EBI-1147174 |
| intact | EBI-1147159 |
| intact | EBI-1145223 |
| intact | EBI-1145223 |
| intact | EBI-1145466 |
| intact | EBI-1145466 |
| intact | EBI-1145404 |
| intact | EBI-1145487 |
| intact | EBI-1145487 |
| intact | EBI-1145487 |
| intact | EBI-1143452 |
| intact | EBI-1145550 |

|        |             |
|--------|-------------|
| intact | EBI-1145550 |

|        |             |
|--------|-------------|
| intact | EBI-1145537 |
| intact | EBI-1145537 |
| intact | EBI-1145537 |

|        |            |
|--------|------------|
| intact | EBI-881262 |
|--------|------------|

|        |             |
|--------|-------------|
| intact | EBI-1145514 |
|--------|-------------|

|        |             |
|--------|-------------|
| intact | EBI-1142143 |
|--------|-------------|

|        |             |
|--------|-------------|
| intact | EBI-1145084 |

|        |             |
|--------|-------------|
| intact | EBI-1145573 |

|        |             |
|--------|-------------|
| intact | EBI-1146370 |



|        |             |
|--------|-------------|
| intact | EBI-1138445 |
| intact | EBI-886140  |
| intact | EBI-1144013 |
| intact | EBI-885288  |
| intact | EBI-1143090 |
| intact | EBI-885288  |
| intact | EBI-885288  |
| intact | EBI-892010  |
| intact | EBI-892010  |
| intact | EBI-885288  |
| intact | EBI-892010  |
| intact | EBI-885288  |
| intact | EBI-892010  |
| intact | EBI-885288  |
| intact | EBI-892010  |
| intact | EBI-885288  |
| intact | EBI-885288  |
| intact | EBI-885288  |
| intact | EBI-892010  |
| intact | EBI-885288  |
| intact | EBI-885288  |
| intact | EBI-1143090 |
| intact | EBI-892010  |
| intact | EBI-892010  |
| intact | EBI-885288  |
| intact | EBI-885288  |

|        |             |
|--------|-------------|
| intact | EBI-1143090 |
| intact | EBI-885288  |
| intact | EBI-892010  |
| intact | EBI-885288  |
| intact | EBI-892010  |
| intact | EBI-885288  |
| intact | EBI-892010  |
| intact | EBI-885288  |
| intact | EBI-885288  |
| intact | EBI-892010  |
| intact | EBI-1143090 |
| intact | EBI-885288  |
| intact | EBI-892010  |
| intact | EBI-885288  |
| intact | EBI-892010  |
| intact | EBI-1143090 |
| intact | EBI-892010  |
| intact | EBI-885288  |
| intact | EBI-892010  |
| intact | EBI-885288  |
| intact | EBI-892010  |
| intact | EBI-1143090 |
| intact | EBI-892010  |
| intact | EBI-892010  |
| intact | EBI-885288  |
| intact | EBI-892010  |
| intact | EBI-892010  |
| intact | EBI-885288  |
| intact | EBI-892010  |
| intact | EBI-885288  |
| intact | EBI-892010  |
| intact | EBI-1143090 |
| intact | EBI-885288  |
| intact | EBI-892010  |
| intact | EBI-885288  |
| intact | EBI-892010  |
| intact | EBI-892010  |
| intact | EBI-892010  |
| intact | EBI-885288  |

|        |             |
|--------|-------------|
| intact | EBI-892010  |
| intact | EBI-885288  |
| intact | EBI-885288  |
| intact | EBI-892010  |
| intact | EBI-885288  |
| intact | EBI-885288  |
| intact | EBI-892010  |
| intact | EBI-885288  |
| intact | EBI-885288  |
| intact | EBI-892010  |
| intact | EBI-885288  |
| intact | EBI-892010  |
| intact | EBI-885288  |
| intact | EBI-892010  |
| intact | EBI-885288  |
| intact | EBI-892010  |
| intact | EBI-885288  |
| intact | EBI-1143090 |
| intact | EBI-885288  |
| intact | EBI-892010  |
| intact | EBI-892010  |
| intact | EBI-885288  |
| intact | EBI-892010  |
| intact | EBI-885288  |
| intact | EBI-892010  |
| intact | EBI-885288  |
| intact | EBI-892010  |
| intact | EBI-892010  |
| intact | EBI-892010  |
| intact | EBI-885288  |
| intact | EBI-885288  |
| intact | EBI-892010  |
| intact | EBI-1143090 |
| intact | EBI-885288  |
| intact | EBI-892010  |
| intact | EBI-885288  |
| intact | EBI-892010  |
| intact | EBI-892010  |
| intact | EBI-885288  |

|        |            |
|--------|------------|
| intact | EBI-892010 |
| intact | EBI-885288 |
| intact | EBI-892010 |
| intact | EBI-892010 |

|        |             |
|--------|-------------|
| intact | EBI-878697  |
| intact | EBI-889536  |
| intact | EBI-889536  |
| intact | EBI-878697  |
| intact | EBI-1139392 |
| intact | EBI-878697  |
| intact | EBI-878697  |
| intact | EBI-878697  |
| intact | EBI-889536  |
| intact | EBI-878697  |
| intact | EBI-889536  |
| intact | EBI-878697  |
| intact | EBI-889536  |
| intact | EBI-878697  |
| intact | EBI-889536  |
| intact | EBI-878697  |
| intact | EBI-878697  |
| intact | EBI-1139392 |
| intact | EBI-878697  |
| intact | EBI-878697  |
| intact | EBI-889536  |
| intact | EBI-878697  |
| intact | EBI-878697  |
| intact | EBI-889536  |
| intact | EBI-889536  |
| intact | EBI-878697  |
| intact | EBI-889536  |
| intact | EBI-878697  |
| intact | EBI-889536  |
| intact | EBI-878697  |
| intact | EBI-878697  |
| intact | EBI-889536  |
| intact | EBI-878697  |
| intact | EBI-889536  |



|        |             |
|--------|-------------|
| intact | EBI-889536  |
| intact | EBI-878697  |
| intact | EBI-889536  |
| intact | EBI-889536  |
| intact | EBI-878697  |
| intact | EBI-878697  |
| intact | EBI-889536  |
| intact | EBI-878697  |
| intact | EBI-889536  |
| intact | EBI-889536  |
| intact | EBI-878697  |
| intact | EBI-889536  |
| intact | EBI-878697  |
| intact | EBI-889536  |
| intact | EBI-1139392 |
| intact | EBI-878697  |
| intact | EBI-1139392 |
| intact | EBI-889536  |
| intact | EBI-889536  |
| intact | EBI-878697  |
| intact | EBI-889536  |
| intact | EBI-889536  |
| intact | EBI-1139392 |
| intact | EBI-889536  |
| intact | EBI-889536  |
| intact | EBI-878697  |
| intact | EBI-889536  |

|        |             |
|--------|-------------|
| intact | EBI-882671  |
| intact | EBI-882671  |
| intact | EBI-890236  |
| intact | EBI-890236  |
| intact | EBI-882671  |
| intact | EBI-882671  |
| intact | EBI-890236  |
| intact | EBI-882671  |
| intact | EBI-890236  |
| intact | EBI-1138798 |
| intact | EBI-882671  |
| intact | EBI-882671  |
| intact | EBI-890236  |
| intact | EBI-1138798 |

|        |             |
|--------|-------------|
| intact | EBI-882671  |
| intact | EBI-890236  |
| intact | EBI-890236  |
| intact | EBI-882671  |
| intact | EBI-890236  |
| intact | EBI-890236  |
| intact | EBI-890236  |
| intact | EBI-1138798 |
| intact | EBI-890236  |
| intact | EBI-882671  |
| intact | EBI-890236  |
| intact | EBI-882671  |
| intact | EBI-890236  |
| intact | EBI-1138798 |
| intact | EBI-890236  |
| intact | EBI-890236  |
| intact | EBI-1138798 |
| intact | EBI-882671  |
| intact | EBI-890236  |
| intact | EBI-882671  |
| intact | EBI-890236  |
| intact | EBI-882671  |
| intact | EBI-882671  |
| intact | EBI-890236  |
| intact | EBI-882671  |
| intact | EBI-890236  |
| intact | EBI-882671  |
| intact | EBI-882671  |
| intact | EBI-890236  |
| intact | EBI-890236  |
| intact | EBI-882671  |
| intact | EBI-890236  |
| intact | EBI-882671  |
| intact | EBI-890236  |
| intact | EBI-882671  |
| intact | EBI-890236  |
| intact | EBI-882671  |
| intact | EBI-890236  |
| intact | EBI-882671  |
| intact | EBI-1138798 |
| intact | EBI-882671  |
| intact | EBI-1138798 |
| intact | EBI-882671  |
| intact | EBI-882671  |

|        |             |
|--------|-------------|
| intact | EBI-890236  |
| intact | EBI-1138798 |
| intact | EBI-890236  |
| intact | EBI-890236  |
| intact | EBI-890236  |
| intact | EBI-882671  |
| intact | EBI-890236  |
| intact | EBI-890236  |
| intact | EBI-882671  |
| intact | EBI-890236  |
| intact | EBI-882671  |
| intact | EBI-882671  |
| intact | EBI-890236  |
| intact | EBI-890236  |
| intact | EBI-882671  |
| intact | EBI-890236  |
| intact | EBI-1138798 |
| intact | EBI-882671  |
| intact | EBI-882671  |
| intact | EBI-882671  |
| intact | EBI-1138798 |
| intact | EBI-890236  |
| intact | EBI-882671  |
| intact | EBI-1138798 |
| intact | EBI-882671  |
| intact | EBI-890236  |
| intact | EBI-882671  |
| intact | EBI-882671  |
| intact | EBI-890236  |
| intact | EBI-882671  |
| intact | EBI-890236  |

|        |             |
|--------|-------------|
| intact | EBI-1141703 |

|        |             |
|--------|-------------|
| intact | EBI-1141720 |
| intact | EBI-1141720 |
| intact | EBI-1141720 |

|        |             |
|--------|-------------|
| intact | EBI-887248  |
| intact | EBI-1141698 |
| intact | EBI-1141698 |
| intact | EBI-1141698 |
| intact | EBI-1139475 |
| intact | EBI-888410  |
| intact | EBI-1139475 |
| intact | EBI-1139475 |
| intact | EBI-1140870 |
| intact | EBI-888473  |
| intact | EBI-849240  |
| intact | EBI-888473  |
| intact | EBI-849240  |
| intact | EBI-849332  |
| intact | EBI-849357  |
| intact | EBI-849381  |
| intact | EBI-893488  |
| intact | EBI-849044  |
| intact | EBI-849432  |
| intact | EBI-849240  |
| intact | EBI-888473  |
| intact | EBI-888473  |
| intact | EBI-849240  |
| intact | EBI-849332  |
| intact | EBI-849357  |
| intact | EBI-849381  |
| intact | EBI-849407  |
| intact | EBI-893488  |
| intact | EBI-849432  |
| intact | EBI-849464  |
| intact | EBI-1169624 |
| intact | EBI-888473  |
| intact | EBI-888473  |
| intact | EBI-893488  |
| intact | EBI-849240  |
| intact | EBI-849332  |

|        |            |
|--------|------------|
| intact | EBI-849357 |
| intact | EBI-849381 |
| intact | EBI-849407 |
| intact | EBI-849432 |
| intact | EBI-849464 |
| intact | EBI-849240 |
| intact | EBI-849332 |
| intact | EBI-849357 |
| intact | EBI-849381 |
| intact | EBI-849407 |
| intact | EBI-849432 |
| intact | EBI-849464 |
| intact | EBI-849240 |
| intact | EBI-849407 |
| intact | EBI-849432 |
| intact | EBI-888473 |
| intact | EBI-849240 |
| intact | EBI-849332 |
| intact | EBI-849357 |
| intact | EBI-849407 |
| intact | EBI-893488 |
| intact | EBI-849464 |
| intact | EBI-888473 |
| intact | EBI-849220 |
| intact | EBI-849381 |
| intact | EBI-849407 |
| intact | EBI-893488 |
| intact | EBI-849044 |
| intact | EBI-849432 |
| intact | EBI-849464 |
| intact | EBI-888473 |
| intact | EBI-849332 |
| intact | EBI-849357 |
| intact | EBI-849357 |
| intact | EBI-849432 |
| intact | EBI-849464 |
| intact | EBI-888473 |
| intact | EBI-893488 |
| intact | EBI-893488 |
| intact | EBI-849432 |
| intact | EBI-849464 |
| intact | EBI-888473 |
| intact | EBI-849332 |
| intact | EBI-849381 |
| intact | EBI-893488 |

|        |            |
|--------|------------|
| intact | EBI-849464 |
| intact | EBI-893488 |
| intact | EBI-888473 |
| intact | EBI-893488 |
| intact | EBI-893488 |
| intact | EBI-893488 |
| intact | EBI-849240 |
| intact | EBI-849464 |
| intact | EBI-888473 |
| intact | EBI-893488 |
| intact | EBI-888473 |
| intact | EBI-893488 |
| intact | EBI-893488 |
| intact | EBI-888473 |
| intact | EBI-849464 |
| intact | EBI-888473 |
| intact | EBI-888473 |
| intact | EBI-888473 |
| intact | EBI-893488 |
| intact | EBI-893488 |
| intact | EBI-888473 |
| intact | EBI-893488 |
| intact | EBI-888473 |
| intact | EBI-888473 |
| intact | EBI-893488 |
| intact | EBI-893488 |
| intact | EBI-893488 |
| intact | EBI-888473 |
| intact | EBI-893488 |
| intact | EBI-849332 |
| intact | EBI-849357 |
| intact | EBI-849381 |
| intact | EBI-849407 |
| intact | EBI-849464 |
| intact | EBI-888473 |
| intact | EBI-849240 |
| intact | EBI-849332 |
| intact | EBI-849357 |
| intact | EBI-849381 |
| intact | EBI-849407 |
| intact | EBI-849432 |
| intact | EBI-849464 |
| intact | EBI-849381 |
| intact | EBI-849407 |

|        |            |
|--------|------------|
| intact | EBI-849464 |
| intact | EBI-849240 |
| intact | EBI-849332 |
| intact | EBI-849240 |
| intact | EBI-849332 |
| intact | EBI-849357 |
| intact | EBI-849381 |
| intact | EBI-849407 |
| intact | EBI-849432 |
| intact | EBI-849464 |
| intact | EBI-893488 |
| intact | EBI-888473 |
| intact | EBI-849407 |
| intact | EBI-849464 |

|        |             |
|--------|-------------|
| intact | EBI-895082  |
| intact | EBI-895082  |
| intact | EBI-1145286 |
| intact | EBI-1145286 |
| intact | EBI-1145286 |
| intact | EBI-895082  |
| intact | EBI-1145286 |
| intact | EBI-895082  |
| intact | EBI-895082  |
| intact | EBI-1145286 |
| intact | EBI-890107  |
| intact | EBI-895082  |
| intact | EBI-895082  |
| intact | EBI-1145286 |

|        |            |
|--------|------------|
| intact | EBI-883997 |
| intact | EBI-891136 |
| intact | EBI-883997 |
| intact | EBI-883997 |
| intact | EBI-891136 |
| intact | EBI-883997 |
| intact | EBI-883997 |
| intact | EBI-883997 |
| intact | EBI-891136 |
| intact | EBI-883997 |





|        |            |
|--------|------------|
| intact | EBI-891136 |
| intact | EBI-883997 |
| intact | EBI-883997 |
| intact | EBI-883997 |

|        |             |
|--------|-------------|
| intact | EBI-883271  |
| intact | EBI-883271  |
| intact | EBI-1145418 |
| intact | EBI-1145418 |
| intact | EBI-1145418 |
| intact | EBI-879354  |
| intact | EBI-1145418 |
| intact | EBI-879354  |
| intact | EBI-879354  |
| intact | EBI-883271  |
| intact | EBI-879354  |
| intact | EBI-883271  |
| intact | EBI-879354  |
| intact | EBI-879354  |
| intact | EBI-879354  |
| intact | EBI-1145418 |
| intact | EBI-879354  |
| intact | EBI-883271  |
| intact | EBI-1145418 |
| intact | EBI-879354  |
| intact | EBI-879354  |
| intact | EBI-879354  |
| intact | EBI-883271  |
| intact | EBI-879354  |
| intact | EBI-1145418 |
| intact | EBI-883271  |
| intact | EBI-883271  |
| intact | EBI-879354  |
| intact | EBI-1145418 |
| intact | EBI-883271  |
| intact | EBI-879354  |
| intact | EBI-883271  |

|        |             |
|--------|-------------|
| intact | EBI-879354  |
| intact | EBI-883271  |
| intact | EBI-879354  |
| intact | EBI-1145418 |
| intact | EBI-883271  |
| intact | EBI-906604  |
| intact | EBI-879354  |
| intact | EBI-883271  |
| intact | EBI-1145418 |
| intact | EBI-906604  |
| intact | EBI-879354  |
| intact | EBI-883271  |
| intact | EBI-1145418 |
| intact | EBI-879354  |
| intact | EBI-883271  |
| intact | EBI-1145418 |
| intact | EBI-879354  |
| intact | EBI-883271  |
| intact | EBI-879354  |
| intact | EBI-879354  |
| intact | EBI-883271  |
| intact | EBI-879354  |
| intact | EBI-883271  |
| intact | EBI-883271  |
| intact | EBI-879354  |
| intact | EBI-879354  |
| intact | EBI-1145418 |
| intact | EBI-879354  |
| intact | EBI-883271  |
| intact | EBI-1145418 |
| intact | EBI-883271  |
| intact | EBI-879354  |
| intact | EBI-879354  |
| intact | EBI-883271  |
| intact | EBI-879354  |
| intact | EBI-883271  |
| intact | EBI-879304  |
| intact | EBI-879304  |
| intact | EBI-879304  |
| intact | EBI-883170  |



|        |            |
|--------|------------|
| intact | EBI-883170 |
| intact | EBI-883170 |
| intact | EBI-879304 |
| intact | EBI-883170 |
| intact | EBI-883170 |
| intact | EBI-883170 |
| intact | EBI-879304 |
| intact | EBI-879304 |
| intact | EBI-883170 |

|        |             |
|--------|-------------|
| intact | EBI-1147184 |
| intact | EBI-883046  |
| intact | EBI-883046  |
| intact | EBI-1147184 |
| intact | EBI-1147184 |
| intact | EBI-883046  |
| intact | EBI-883046  |
| intact | EBI-1147184 |
| intact | EBI-879261  |
| intact | EBI-883046  |
| intact | EBI-1147184 |
| intact | EBI-1147184 |
| intact | EBI-1147184 |
| intact | EBI-879261  |
| intact | EBI-879261  |
| intact | EBI-883046  |
| intact | EBI-879261  |
| intact | EBI-1147184 |
| intact | EBI-879261  |
| intact | EBI-883046  |
| intact | EBI-1147184 |
| intact | EBI-879261  |
| intact | EBI-879261  |
| intact | EBI-883046  |
| intact | EBI-879261  |
| intact | EBI-883046  |
| intact | EBI-879261  |
| intact | EBI-883046  |
| intact | EBI-1147184 |
| intact | EBI-883046  |
| intact | EBI-883046  |
| intact | EBI-879261  |
| intact | EBI-883046  |
| intact | EBI-879261  |
| intact | EBI-883046  |

|        |             |
|--------|-------------|
| intact | EBI-879261  |
| intact | EBI-883046  |
| intact | EBI-1147184 |
| intact | EBI-2123305 |
| intact | EBI-2116750 |
| intact | EBI-879261  |
| intact | EBI-883046  |
| intact | EBI-1147184 |
| intact | EBI-1780332 |
| intact | EBI-879261  |
| intact | EBI-883046  |
| intact | EBI-2123305 |
| intact | EBI-2116750 |
| intact | EBI-879261  |
| intact | EBI-883046  |
| intact | EBI-1147184 |
| intact | EBI-883046  |
| intact | EBI-879261  |
| intact | EBI-883046  |
| intact | EBI-883046  |
| intact | EBI-879261  |
| intact | EBI-883046  |
| intact | EBI-879261  |
| intact | EBI-883046  |
| intact | EBI-879261  |
| intact | EBI-883046  |
| intact | EBI-1147184 |
| intact | EBI-1147184 |
| intact | EBI-1147184 |
| intact | EBI-883046  |

|        |             |
|--------|-------------|
| intact | EBI-886257  |
| intact | EBI-1144702 |
| intact | EBI-892741  |
| intact | EBI-1144702 |
| intact | EBI-1144702 |
| intact | EBI-886257  |
| intact | EBI-892741  |
| intact | EBI-1144702 |
| intact | EBI-1144702 |
| intact | EBI-1144702 |
| intact | EBI-886257  |

|        |             |
|--------|-------------|
| intact | EBI-892741  |
| intact | EBI-892741  |
| intact | EBI-1144702 |
| intact | EBI-1144702 |
| intact | EBI-892741  |
| intact | EBI-1144702 |
| intact | EBI-886257  |
| intact | EBI-892741  |
| intact | EBI-886257  |
| intact | EBI-892741  |
| intact | EBI-886257  |
| intact | EBI-892741  |
| intact | EBI-886257  |
| intact | EBI-892741  |
| intact | EBI-886257  |
| intact | EBI-892741  |
| intact | EBI-1144702 |
| intact | EBI-1144702 |
| intact | EBI-892741  |
| intact | EBI-886257  |
| intact | EBI-892741  |
| intact | EBI-886257  |
| intact | EBI-892741  |
| intact | EBI-1144702 |
| intact | EBI-886257  |
| intact | EBI-892741  |
| intact | EBI-1144702 |
| intact | EBI-2116718 |
| intact | EBI-886257  |
| intact | EBI-892741  |
| intact | EBI-892741  |
| intact | EBI-886257  |
| intact | EBI-1144702 |
| intact | EBI-886257  |
| intact | EBI-886257  |
| intact | EBI-886257  |
| intact | EBI-892741  |
| intact | EBI-886257  |
| intact | EBI-892741  |
| intact | EBI-2013665 |
| intact | EBI-892741  |
| intact | EBI-1144702 |
| intact | EBI-1144702 |
| intact | EBI-1144087 |

|        |             |
|--------|-------------|
| intact | EBI-892437  |
| intact | EBI-885881  |
| intact | EBI-892437  |
| intact | EBI-885881  |
| intact | EBI-892437  |
| intact | EBI-885881  |
| intact | EBI-885881  |
| intact | EBI-892437  |
| intact | EBI-885881  |
| intact | EBI-885881  |
| intact | EBI-892437  |
| intact | EBI-885881  |
| intact | EBI-892437  |
| intact | EBI-892437  |
| intact | EBI-1144087 |
| intact | EBI-892437  |
| intact | EBI-885881  |
| intact | EBI-892437  |
| intact | EBI-885881  |
| intact | EBI-892437  |
| intact | EBI-885881  |
| intact | EBI-1144087 |
| intact | EBI-892437  |
| intact | EBI-892437  |
| intact | EBI-892437  |
| intact | EBI-885881  |
| intact | EBI-892437  |
| intact | EBI-892437  |
| intact | EBI-892437  |
| intact | EBI-885881  |
| intact | EBI-1144087 |
| intact | EBI-892437  |
| intact | EBI-885881  |
| intact | EBI-885881  |
| intact | EBI-892437  |
| intact | EBI-885881  |
| intact | EBI-892437  |
| intact | EBI-885881  |
| intact | EBI-885881  |
| intact | EBI-892437  |
| intact | EBI-885881  |
| intact | EBI-885881  |
| intact | EBI-892437  |
| intact | EBI-885881  |
| intact | EBI-885881  |
| intact | EBI-892437  |
| intact | EBI-885881  |

|        |             |
|--------|-------------|
| intact | EBI-892437  |
| intact | EBI-885881  |
| intact | EBI-892437  |
| intact | EBI-892437  |
| intact | EBI-892437  |
| intact | EBI-885881  |
| intact | EBI-892437  |
| intact | EBI-892437  |
| intact | EBI-885881  |
| intact | EBI-1144087 |
| intact | EBI-892437  |
| intact | EBI-885881  |
| intact | EBI-892437  |
| intact | EBI-892437  |
| intact | EBI-885881  |
| intact | EBI-1144087 |
| intact | EBI-1144087 |
| intact | EBI-1144087 |
| intact | EBI-885881  |
| intact | EBI-885881  |
| intact | EBI-1144087 |
| intact | EBI-885881  |
| intact | EBI-1144087 |
| intact | EBI-1144087 |
| intact | EBI-892437  |
| intact | EBI-885881  |
| intact | EBI-1144087 |

|        |             |
|--------|-------------|
| intact | EBI-1147078 |

|        |             |
|--------|-------------|
| intact | EBI-1135782 |
| intact | EBI-1135782 |
| intact | EBI-1135782 |

|        |             |
|--------|-------------|
| intact | EBI-1138332 |



intact EBI-1138332  
intact EBI-1138332

intact EBI-2623995  
intact EBI-2623979  
intact EBI-2607987

intact EBI-1145610  
intact EBI-1145610  
intact EBI-1145610  
intact EBI-1145610  
intact EBI-1145610

intact EBI-1145459

intact EBI-1145504  
intact EBI-1145504  
intact EBI-1145504  
intact EBI-1145504

intact EBI-1144972  
intact EBI-1144972  
intact EBI-1144972  
intact EBI-1144972  
intact EBI-1144972  
intact EBI-1144972

intact EBI-1143455  
intact EBI-1143455  
intact EBI-1143455  
intact EBI-1143455

intact EBI-1147674  
intact EBI-1147674

intact EBI-2370547  
intact EBI-2370566  
intact EBI-2370486

intact EBI-1135770  
intact EBI-1135770

intact EBI-1135770

intact EBI-1145531

intact EBI-1145434

intact EBI-884272

intact EBI-884272

intact EBI-1145472

intact EBI-1147655

intact EBI-1147655

intact EBI-1147655

intact EBI-1147655

intact EBI-1147655

intact EBI-1147655

intact EBI-2463592

intact EBI-1145499

intact EBI-1145499

intact EBI-1145214

intact EBI-1145214

intact EBI-1145214

intact EBI-1135454

intact EBI-1135454  
intact EBI-1135454

intact EBI-1145382  
intact EBI-1145382

intact EBI-1147905  
intact EBI-1147905

intact EBI-890983  
intact EBI-883806  
intact EBI-1145973  
intact EBI-1145973  
intact EBI-1145973

intact EBI-1144390  
intact EBI-1144390  
intact EBI-1144390  
intact EBI-1144390

intact EBI-1135533  
intact EBI-894346  
intact EBI-894346

|        |             |
|--------|-------------|
| intact | EBI-894346  |
| intact | EBI-883898  |
| intact | EBI-1144905 |
| intact | EBI-1144905 |
| intact | EBI-1140230 |
| intact | EBI-1142134 |
| intact | EBI-892392  |
| intact | EBI-885843  |
| intact | EBI-892392  |
| intact | EBI-1142134 |
| intact | EBI-1138195 |
| intact | EBI-1141081 |
| intact | EBI-1139483 |
| intact | EBI-1139483 |

intact EBI-1140917  
intact EBI-1140917  
intact EBI-1140917

intact EBI-1143989

intact EBI-886105  
intact EBI-886105  
intact EBI-880477  
intact EBI-880477  
intact EBI-886105  
intact EBI-880477  
intact EBI-880477  
intact EBI-880477  
intact EBI-880477  
intact EBI-886105  
intact EBI-880477  
intact EBI-886105  
intact EBI-886105  
intact EBI-880477  
intact EBI-886105  
intact EBI-886105  
intact EBI-886105  
intact EBI-886105  
intact EBI-886105  
intact EBI-886105  
intact EBI-1213293  
intact EBI-880477  
intact EBI-886105  
intact EBI-761473  
intact EBI-886105  
intact EBI-880477  
intact EBI-907365  
intact EBI-907365

intact EBI-886253  
intact EBI-880504  
intact EBI-886253  
intact EBI-1146244  
intact EBI-1146244  
intact EBI-886253  
intact EBI-1146244  
intact EBI-880504  
intact EBI-1146244

|        |             |
|--------|-------------|
| intact | EBI-890918  |
| intact | EBI-883733  |
| intact | EBI-883733  |
| intact | EBI-883733  |
| intact | EBI-1146180 |
| intact | EBI-883733  |
| intact | EBI-890918  |
| intact | EBI-1146180 |
| intact | EBI-890918  |
| intact | EBI-883733  |
| intact | EBI-1146180 |
| intact | EBI-890918  |
| intact | EBI-883733  |
| intact | EBI-890918  |
| intact | EBI-883733  |
| intact | EBI-883733  |
| intact | EBI-890918  |
| intact | EBI-1146180 |
| intact | EBI-890918  |
| intact | EBI-883733  |
| intact | EBI-890918  |
| intact | EBI-883733  |

|        |             |
|--------|-------------|
| intact | EBI-1140712 |

|        |             |
|--------|-------------|
| intact | EBI-1140712 |

|        |             |
|--------|-------------|
| intact | EBI-1137705 |
|--------|-------------|

|        |             |
|--------|-------------|
| intact | EBI-1147974 |
|--------|-------------|

|        |             |
|--------|-------------|
| intact | EBI-1135494 |
| intact | EBI-1135494 |

|        |            |
|--------|------------|
| intact | EBI-881988 |

|        |             |
|--------|-------------|
| intact | EBI-1214222 |
|--------|-------------|

|        |             |
|--------|-------------|
| intact | EBI-1145639 |
| intact | EBI-893588  |
| intact | EBI-893588  |
| intact | EBI-1145639 |
| intact | EBI-893588  |
| intact | EBI-893588  |
| intact | EBI-851353  |







|        |            |
|--------|------------|
| intact | EBI-880676 |
| intact | EBI-886668 |
| intact | EBI-886668 |
| intact | EBI-880676 |
| intact | EBI-886668 |
| intact | EBI-886668 |
| intact | EBI-886668 |
| intact | EBI-880676 |
| intact | EBI-880676 |
| intact | EBI-880676 |
| intact | EBI-886668 |

|        |             |
|--------|-------------|
| intact | EBI-1143343 |
| intact | EBI-889906  |
| intact | EBI-1143343 |
| intact | EBI-894853  |
| intact | EBI-889906  |
| intact | EBI-894853  |
| intact | EBI-894853  |
| intact | EBI-889906  |
| intact | EBI-894853  |
| intact | EBI-889906  |
| intact | EBI-894853  |
| intact | EBI-889906  |
| intact | EBI-1143343 |

|        |            |
|--------|------------|
| intact | EBI-880876 |

|        |             |
|--------|-------------|
| intact | EBI-1147361 |
| intact | EBI-1147361 |

|        |            |
|--------|------------|
| intact | EBI-891549 |
| intact | EBI-891549 |
| intact | EBI-891549 |

|        |            |
|--------|------------|
| intact | EBI-891549 |
| intact | EBI-891549 |
| intact | EBI-891549 |
| intact | EBI-884735 |
| intact | EBI-884735 |
| intact | EBI-891549 |

|        |             |
|--------|-------------|
| intact | EBI-882920  |
| intact | EBI-882920  |
| intact | EBI-890426  |
| intact | EBI-882920  |
| intact | EBI-882920  |
| intact | EBI-882920  |
| intact | EBI-1143521 |
| intact | EBI-890426  |
| intact | EBI-882920  |
| intact | EBI-890426  |
| intact | EBI-882920  |
| intact | EBI-890426  |
| intact | EBI-882920  |
| intact | EBI-890426  |
| intact | EBI-882920  |
| intact | EBI-882920  |
| intact | EBI-890426  |
| intact | EBI-1143521 |
| intact | EBI-1143521 |
| intact | EBI-882920  |
| intact | EBI-1143521 |
| intact | EBI-1143521 |
| intact | EBI-890426  |
| intact | EBI-882920  |

|        |             |
|--------|-------------|
| intact | EBI-1139684 |
|--------|-------------|



|        |             |
|--------|-------------|
| intact | EBI-891312  |
| intact | EBI-1135459 |
| intact | EBI-1135459 |
| intact | EBI-891312  |

|        |             |
|--------|-------------|
| intact | EBI-1143684 |
| intact | EBI-883462  |
| intact | EBI-883462  |
| intact | EBI-883462  |
| intact | EBI-1143684 |
| intact | EBI-883462  |
| intact | EBI-1143684 |

|        |             |
|--------|-------------|
| intact | EBI-1137091 |
| intact | EBI-1137091 |

|        |             |
|--------|-------------|
| intact | EBI-1141111 |
| intact | EBI-878680  |
| intact | EBI-1141111 |
| intact | EBI-878680  |

|        |             |
|--------|-------------|
| intact | EBI-1142723 |
| intact | EBI-879483  |

|        |             |
|--------|-------------|
| intact | EBI-894357  |
| intact | EBI-894357  |
| intact | EBI-1140593 |
| intact | EBI-894357  |
| intact | EBI-880513  |
| intact | EBI-894357  |
| intact | EBI-894357  |
| intact | EBI-894357  |

|        |             |
|--------|-------------|
| intact | EBI-882248  |
| intact | EBI-889827  |
| intact | EBI-882248  |
| intact | EBI-1146140 |
| intact | EBI-882248  |
| intact | EBI-889827  |
| intact | EBI-882248  |
| intact | EBI-889827  |

|        |             |
|--------|-------------|
| intact | EBI-1146135 |
| intact | EBI-1146135 |
| intact | EBI-1146135 |

|        |             |
|--------|-------------|
| intact | EBI-886272  |
| intact | EBI-1135335 |
| intact | EBI-889355  |
| intact | EBI-1135335 |
| intact | EBI-886272  |
| intact | EBI-886272  |
| intact | EBI-886272  |
| intact | EBI-1135335 |
| intact | EBI-886272  |

|        |             |
|--------|-------------|
| intact | EBI-895256  |
| intact | EBI-895256  |
| intact | EBI-890312  |
| intact | EBI-1144197 |
| intact | EBI-895256  |
| intact | EBI-1144197 |
| intact | EBI-1144197 |
| intact | EBI-895256  |
| intact | EBI-890312  |
| intact | EBI-890312  |
| intact | EBI-1144197 |
| intact | EBI-895256  |







|        |             |
|--------|-------------|
| intact | EBI-884548  |
| intact | EBI-1140596 |
| intact | EBI-884548  |
| intact | EBI-1140596 |
| intact | EBI-884548  |
| intact | EBI-884548  |

|        |             |
|--------|-------------|
| intact | EBI-1147767 |
|--------|-------------|

|        |             |
|--------|-------------|
| intact | EBI-1145723 |
| intact | EBI-891201  |
| intact | EBI-891201  |
| intact | EBI-1145723 |
| intact | EBI-891201  |
| intact | EBI-1145723 |
| intact | EBI-891201  |
| intact | EBI-1145723 |

|        |             |
|--------|-------------|
| intact | EBI-1140336 |
| intact | EBI-1140336 |
| intact | EBI-885248  |
| intact | EBI-891999  |
| intact | EBI-1140336 |
| intact | EBI-891999  |
| intact | EBI-885248  |
| intact | EBI-891999  |

|        |             |
|--------|-------------|
| intact | EBI-1142924 |
| intact | EBI-1142924 |

|        |             |
|--------|-------------|
| intact | EBI-1771045 |
|--------|-------------|



|        |            |
|--------|------------|
| intact | EBI-892692 |
| intact | EBI-886205 |
| intact | EBI-892692 |
| intact | EBI-886205 |
| intact | EBI-892692 |
| intact | EBI-886205 |
| intact | EBI-892692 |

|        |             |
|--------|-------------|
| intact | EBI-1136301 |
| intact | EBI-1136301 |

|        |             |
|--------|-------------|
| intact | EBI-1136559 |
| intact | EBI-1136559 |
| intact | EBI-1136559 |

|        |             |
|--------|-------------|
| intact | EBI-1138884 |

|        |             |
|--------|-------------|
| intact | EBI-1136521 |

|        |            |
|--------|------------|
| intact | EBI-371377 |
| intact | EBI-369356 |
| intact | EBI-371168 |
| intact | EBI-371168 |
| intact | EBI-371377 |
| intact | EBI-371168 |

|        |            |
|--------|------------|
| intact | EBI-369356 |
| intact | EBI-369356 |
| intact | EBI-371168 |
| intact | EBI-369356 |
| intact | EBI-371168 |
| intact | EBI-369356 |
| intact | EBI-371168 |
| intact | EBI-369356 |
| intact | EBI-371377 |
| intact | EBI-371168 |
| intact | EBI-369356 |
| intact | EBI-371168 |
| intact | EBI-369356 |
| intact | EBI-369356 |
| intact | EBI-369356 |
| intact | EBI-371168 |
| intact | EBI-369356 |
| intact | EBI-371168 |
| intact | EBI-369356 |
| intact | EBI-369356 |
| intact | EBI-371168 |
| intact | EBI-369356 |
| intact | EBI-369356 |
| intact | EBI-369356 |
| intact | EBI-371168 |
| intact | EBI-371377 |
| intact | EBI-369356 |
| intact | EBI-369356 |
| intact | EBI-371168 |
| intact | EBI-371377 |
| intact | EBI-369356 |
| intact | EBI-369356 |
| intact | EBI-371377 |
| intact | EBI-371168 |
| intact | EBI-369356 |

|        |             |
|--------|-------------|
| intact | EBI-369356  |
| intact | EBI-371168  |
| intact | EBI-369356  |
| intact | EBI-371168  |
| intact | EBI-371168  |
| intact | EBI-369356  |
| intact | EBI-371168  |
| intact | EBI-369356  |
| intact | EBI-371377  |
| intact | EBI-371168  |
| intact | EBI-371377  |
| intact | EBI-369356  |
| intact | EBI-369356  |
| intact | EBI-369356  |
| intact | EBI-371168  |
| intact | EBI-369356  |
| intact | EBI-369356  |
| intact | EBI-369356  |
| intact | EBI-371168  |
| intact | EBI-369356  |
| intact | EBI-371168  |
| intact | EBI-369356  |
| intact | EBI-369356  |
| intact | EBI-371377  |
| intact | EBI-369356  |
| intact | EBI-369356  |
| intact | EBI-371168  |
| intact | EBI-369356  |
| intact | EBI-371168  |
| intact | EBI-369356  |
| intact | EBI-371168  |
| intact | EBI-369356  |
| intact | EBI-371168  |
| intact | EBI-369356  |
| intact | EBI-371168  |
| intact | EBI-369356  |
| intact | EBI-371377  |
| intact | EBI-369356  |
| intact | EBI-369356  |
| intact | EBI-1029844 |



|        |             |
|--------|-------------|
| intact | EBI-2463360 |
| intact | EBI-1136591 |
| intact | EBI-2463360 |
| intact | EBI-1136591 |
| intact | EBI-2463360 |
| intact | EBI-1136591 |
| intact | EBI-2463360 |
| intact | EBI-1136591 |
| intact | EBI-1136591 |
| intact | EBI-2463360 |
| intact | EBI-2463360 |
| intact | EBI-2463360 |
| intact | EBI-1136591 |
| intact | EBI-1136591 |
| intact | EBI-2463360 |
| intact | EBI-1136591 |
| intact | EBI-2463360 |
| intact | EBI-2463360 |
| intact | EBI-1136591 |
| intact | EBI-1136591 |
| intact | EBI-2463360 |
| intact | EBI-2463360 |
| intact | EBI-1136591 |
| intact | EBI-2463360 |
| intact | EBI-1136591 |
| intact | EBI-1136591 |
| intact | EBI-2463360 |
| intact | EBI-2463360 |
| intact | EBI-2463360 |
| intact | EBI-1136591 |
| intact | EBI-2463360 |
| intact | EBI-895036  |
| intact | EBI-895036  |
| intact | EBI-2463360 |
| intact | EBI-895036  |
| intact | EBI-895036  |

|        |             |
|--------|-------------|
| intact | EBI-2463360 |
| intact | EBI-895036  |
| intact | EBI-2463360 |
| intact | EBI-2463360 |
| intact | EBI-1136591 |
| intact | EBI-2463360 |
| intact | EBI-2463360 |
| intact | EBI-2463360 |
| intact | EBI-1136591 |
| intact | EBI-1136591 |
| intact | EBI-895036  |
| intact | EBI-2463360 |
| intact | EBI-895036  |
| intact | EBI-2463360 |
| intact | EBI-1136591 |
| intact | EBI-2463360 |
| intact | EBI-1136591 |
| intact | EBI-2463360 |
| intact | EBI-1136591 |
| intact | EBI-895036  |
| intact | EBI-1136591 |
| intact | EBI-2463360 |
| intact | EBI-895036  |
| intact | EBI-2463360 |
| intact | EBI-1771052 |
| intact | EBI-1136591 |
| intact | EBI-1136591 |
| intact | EBI-2463360 |
| intact | EBI-895036  |
| intact | EBI-2463360 |
| intact | EBI-2369446 |
| intact | EBI-895036  |



intact EBI-895036

intact EBI-878854

intact EBI-893705

intact EBI-893705

intact EBI-888130

intact EBI-2369602

intact EBI-893705

intact EBI-1139424

intact EBI-888130

intact EBI-893705

intact EBI-888130

intact EBI-888130

intact EBI-888130

intact EBI-888130

intact EBI-888130

intact EBI-893705

intact EBI-1139424

intact EBI-888130

intact EBI-888130

intact EBI-888130

intact EBI-888130

intact EBI-888130

intact EBI-893705

intact EBI-2369608

intact EBI-893705

intact EBI-888130

intact EBI-888130

intact EBI-888130

intact EBI-2369599

intact EBI-893705

intact EBI-1139424

|        |             |
|--------|-------------|
| intact | EBI-1139555 |
| intact | EBI-1139555 |

|        |             |
|--------|-------------|
| intact | EBI-1139155 |
|--------|-------------|

|        |             |
|--------|-------------|
| intact | EBI-1147737 |

|        |             |
|--------|-------------|
| intact | EBI-1147746 |

|        |             |
|--------|-------------|
| intact | EBI-1144466 |
| intact | EBI-882273  |
| intact | EBI-2370504 |
| intact | EBI-2370497 |
| intact | EBI-2370517 |
| intact | EBI-882273  |
| intact | EBI-882273  |
| intact | EBI-1144466 |
| intact | EBI-882273  |
| intact | EBI-882273  |
| intact | EBI-882273  |

|        |             |
|--------|-------------|
| intact | EBI-882273  |
| intact | EBI-889884  |
| intact | EBI-882273  |
| intact | EBI-889884  |
| intact | EBI-882273  |
| intact | EBI-889884  |
| intact | EBI-882273  |
| intact | EBI-889884  |
| intact | EBI-882273  |
| intact | EBI-882273  |
| intact | EBI-1144466 |
| intact | EBI-882273  |

|        |             |
|--------|-------------|
| intact | EBI-1146412 |
| intact | EBI-1146412 |
| intact | EBI-1146412 |

|        |             |
|--------|-------------|
| intact | EBI-1144986 |

|        |             |
|--------|-------------|
| intact | EBI-1138283 |
|--------|-------------|

intact EBI-1140241  
intact EBI-1140241

intact EBI-1145622  
intact EBI-1145622  
intact EBI-1145622  
intact EBI-1145622

intact EBI-1139552  
intact EBI-885269

intact EBI-1146759  
intact EBI-1146759  
intact EBI-1146759  
intact EBI-890557  
intact EBI-1146759  
intact EBI-1146759  
intact EBI-883223  
intact EBI-890557

intact EBI-1137645  
intact EBI-1137645  
intact EBI-1137645  
intact EBI-882246

intact EBI-1146753

intact EBI-894652  
intact EBI-889746  
intact EBI-1147646  
intact EBI-894652  
intact EBI-894652  
intact EBI-894652  
intact EBI-889746  
intact EBI-894652  
intact EBI-894652  
intact EBI-889746  
intact EBI-894652  
intact EBI-889746  
intact EBI-889746

|        |            |
|--------|------------|
| intact | EBI-894652 |
| intact | EBI-889746 |
| intact | EBI-894652 |
| intact | EBI-894652 |
| intact | EBI-889746 |
| intact | EBI-894652 |
| intact | EBI-894652 |
| intact | EBI-894652 |
| intact | EBI-889746 |
| intact | EBI-894652 |
| intact | EBI-889746 |
| intact | EBI-894652 |
| intact | EBI-889746 |
| intact | EBI-894652 |
| intact | EBI-889746 |

|        |             |
|--------|-------------|
| intact | EBI-1143039 |

|        |             |
|--------|-------------|
| intact | EBI-1142543 |
| intact | EBI-879802  |
| intact | EBI-884632  |
| intact | EBI-884632  |
| intact | EBI-884632  |



|        |             |
|--------|-------------|
| intact | EBI-1137384 |
| intact | EBI-1137384 |
| intact | EBI-2011463 |
| intact | EBI-878894  |
| intact | EBI-1137384 |
| intact | EBI-1137384 |
| intact | EBI-1137384 |
| intact | EBI-878894  |
| intact | EBI-1137384 |
| intact | EBI-878894  |
| intact | EBI-1137384 |
| intact | EBI-1137384 |
| intact | EBI-878894  |
| intact | EBI-1137384 |
| intact | EBI-878894  |
| intact | EBI-1137384 |
| intact | EBI-1137384 |
| intact | EBI-1137384 |
| intact | EBI-882058  |
| intact | EBI-882058  |
| intact | EBI-1137384 |
| intact | EBI-1137384 |
| intact | EBI-878894  |
| intact | EBI-882058  |
| intact | EBI-1137384 |
| intact | EBI-878894  |

|        |             |
|--------|-------------|
| intact | EBI-892411  |
| intact | EBI-1138463 |
| intact | EBI-885862  |
| intact | EBI-892411  |
| intact | EBI-892411  |
| intact | EBI-1138463 |
| intact | EBI-892411  |

|        |             |
|--------|-------------|
| intact | EBI-1147356 |
| intact | EBI-1147356 |
| intact | EBI-1147356 |

|        |            |
|--------|------------|
| intact | EBI-887152 |
| intact | EBI-880917 |
| intact | EBI-887152 |





intact EBI-880917

intact EBI-1147864

intact EBI-1147864

intact EBI-1138601

intact EBI-1138601

intact EBI-884705

intact EBI-1144212

intact EBI-884705

intact EBI-1144212

intact EBI-1144212

intact EBI-1144212

intact EBI-1135993

intact EBI-1135675

intact EBI-1135675

intact EBI-907382

intact EBI-1135942

intact EBI-1136056

intact EBI-1136056

intact EBI-1136056

intact EBI-1136056

intact EBI-1136056

intact EBI-1136090

intact EBI-1136090

intact EBI-1136090



intact EBI-1137127  
intact EBI-1137127

intact EBI-1137495  
intact EBI-887698  
intact EBI-1137495  
intact EBI-1137495  
intact EBI-1137495  
intact EBI-1137495  
intact EBI-1137495

intact EBI-853009  
intact EBI-861755  
intact EBI-861881  
intact EBI-853009  
intact EBI-861755  
intact EBI-853009  
intact EBI-861755  
intact EBI-879840  
intact EBI-884687  
intact EBI-879840  
intact EBI-879840  
intact EBI-853009  
intact EBI-853024  
intact EBI-853009  
intact EBI-879840

intact EBI-1137753  
intact EBI-1137753  
intact EBI-1137753  
intact EBI-907046  
intact EBI-1137753

intact EBI-1137759  
intact EBI-1137759  
intact EBI-1137759

intact EBI-1137764  
intact EBI-1137764  
intact EBI-1137764  
intact EBI-1137764

intact EBI-1138097  
intact EBI-1138097

intact EBI-1138226  
intact EBI-1138226  
intact EBI-1138226

intact EBI-889127

intact EBI-1138231  
intact EBI-1138231  
intact EBI-882921  
intact EBI-882921  
intact EBI-879208  
intact EBI-882921  
intact EBI-882921  
intact EBI-879208  
intact EBI-879208  
intact EBI-1138231  
intact EBI-882921  
intact EBI-1138231  
intact EBI-879208  
intact EBI-882921  
intact EBI-879208  
intact EBI-882921  
intact EBI-882921  
intact EBI-879208  
intact EBI-882921  
intact EBI-882921  
intact EBI-882921  
intact EBI-882921  
intact EBI-879208  
intact EBI-1138231  
intact EBI-882921  
intact EBI-882921  
intact EBI-879208  
intact EBI-882921  
intact EBI-882921

|        |             |
|--------|-------------|
| intact | EBI-882921  |
| intact | EBI-882921  |
| intact | EBI-879208  |
| intact | EBI-882921  |
| intact | EBI-882921  |
| intact | EBI-879208  |
| intact | EBI-882921  |
| intact | EBI-879208  |
| intact | EBI-882921  |
| intact | EBI-879208  |
| intact | EBI-882921  |
| intact | EBI-882921  |
| intact | EBI-879208  |
| intact | EBI-879208  |
| intact | EBI-879208  |
| intact | EBI-882921  |
| intact | EBI-879208  |
| intact | EBI-882921  |
| intact | EBI-882921  |
| intact | EBI-882921  |
| intact | EBI-879208  |
| intact | EBI-882921  |
| intact | EBI-882921  |
| intact | EBI-879208  |
| intact | EBI-879208  |
| intact | EBI-882921  |
| intact | EBI-882921  |
| intact | EBI-882921  |
| intact | EBI-879208  |
| intact | EBI-879208  |
| intact | EBI-1138231 |

|        |             |
|--------|-------------|
| intact | EBI-1138299 |
| intact | EBI-1138299 |

|        |            |
|--------|------------|
| intact | EBI-887352 |
| intact | EBI-887352 |

|        |             |
|--------|-------------|
| intact | EBI-1138386 |
|--------|-------------|

|        |             |
|--------|-------------|
| intact | EBI-1138481 |

intact EBI-1138481

intact EBI-892506

intact EBI-892506

intact EBI-892506

intact EBI-894298

intact EBI-1138811

intact EBI-1138952

intact EBI-1139123

intact EBI-1139123

intact EBI-1139123

intact EBI-1139123

|        |             |
|--------|-------------|
| intact | EBI-1139235 |
| intact | EBI-893845  |
| intact | EBI-1139235 |

|        |            |
|--------|------------|
| intact | EBI-893901 |
| intact | EBI-893901 |
| intact | EBI-888756 |
| intact | EBI-893901 |
| intact | EBI-893901 |
| intact | EBI-893901 |

|        |             |
|--------|-------------|
| intact | EBI-1139537 |
| intact | EBI-1139537 |
| intact | EBI-1139537 |

|        |             |
|--------|-------------|
| intact | EBI-1139564 |
|--------|-------------|

|        |             |
|--------|-------------|
| intact | EBI-1139564 |

|        |             |
|--------|-------------|
| intact | EBI-1139627 |

|        |             |
|--------|-------------|
| intact | EBI-1139674 |
| intact | EBI-1139674 |
| intact | EBI-1139674 |

|        |             |
|--------|-------------|
| intact | EBI-1139849 |
|--------|-------------|

|        |             |
|--------|-------------|
| intact | EBI-1139910 |

|        |             |
|--------|-------------|
| intact | EBI-1140084 |

|        |             |
|--------|-------------|
| intact | EBI-1140096 |
| intact | EBI-1140096 |
| intact | EBI-1140096 |



|        |             |
|--------|-------------|
| intact | EBI-1140096 |

|        |             |
|--------|-------------|
| intact | EBI-1140414 |

|        |            |
|--------|------------|
| intact | EBI-893871 |
| intact | EBI-883851 |
| intact | EBI-883851 |

|        |            |
|--------|------------|
| intact | EBI-890196 |

|        |             |
|--------|-------------|
| intact | EBI-1140722 |
| intact | EBI-1140722 |
| intact | EBI-1140722 |

|        |             |
|--------|-------------|
| intact | EBI-1140722 |

|        |             |
|--------|-------------|
| intact | EBI-879788  |
| intact | EBI-1140746 |

|        |             |
|--------|-------------|
| intact | EBI-1140787 |
| intact | EBI-1140787 |

|        |             |
|--------|-------------|
| intact | EBI-890179  |
| intact | EBI-890179  |
| intact | EBI-1140803 |
| intact | EBI-1140803 |

|        |             |
|--------|-------------|
| intact | EBI-1140807 |

|        |             |
|--------|-------------|
| intact | EBI-1140882 |
|--------|-------------|

|        |             |
|--------|-------------|
| intact | EBI-881680  |
| intact | EBI-1140882 |
| intact | EBI-1140882 |
| intact | EBI-881680  |
| intact | EBI-1140882 |

|        |             |
|--------|-------------|
| intact | EBI-1141091 |
| intact | EBI-1141091 |
| intact | EBI-893792  |
| intact | EBI-1141091 |
| intact | EBI-893792  |
| intact | EBI-1141091 |
| intact | EBI-893792  |
| intact | EBI-893792  |

|        |             |
|--------|-------------|
| intact | EBI-1141336 |
| intact | EBI-1141336 |
| intact | EBI-1141336 |

|        |             |
|--------|-------------|
| intact | EBI-1141414 |
| intact | EBI-1141414 |
| intact | EBI-1141414 |





|        |             |
|--------|-------------|
| intact | EBI-891424  |
| intact | EBI-891424  |
| intact | EBI-891424  |
| intact | EBI-879491  |
| intact | EBI-879491  |
| intact | EBI-891424  |
| intact | EBI-1143364 |
| intact | EBI-879491  |
| intact | EBI-891424  |
| intact | EBI-879491  |
| intact | EBI-891424  |
| intact | EBI-879491  |
| intact | EBI-891424  |
| intact | EBI-891424  |
| intact | EBI-891424  |
| intact | EBI-1143364 |
| intact | EBI-891424  |

|        |             |
|--------|-------------|
| intact | EBI-1144166 |

|        |             |
|--------|-------------|
| intact | EBI-1144233 |

|        |            |
|--------|------------|
| intact | EBI-890430 |
|--------|------------|

|        |             |
|--------|-------------|
| intact | EBI-890430  |
| intact | EBI-1144536 |
| intact | EBI-1144536 |

|        |             |
|--------|-------------|
| intact | EBI-1144590 |
|--------|-------------|

|        |             |
|--------|-------------|
| intact | EBI-1144951 |

|        |             |
|--------|-------------|
| intact | EBI-1145294 |
| intact | EBI-1145294 |

|        |             |
|--------|-------------|
| intact | EBI-1145667 |
| intact | EBI-1145667 |

|        |             |
|--------|-------------|
| intact | EBI-1145821 |
| intact | EBI-1145821 |

|        |             |
|--------|-------------|
| intact | EBI-1145944 |
|--------|-------------|





|        |             |
|--------|-------------|
| intact | EBI-1147040 |

|        |             |
|--------|-------------|
| intact | EBI-1147353 |
|--------|-------------|

|        |             |
|--------|-------------|
| intact | EBI-891042  |
| intact | EBI-1147604 |
| intact | EBI-1147604 |
| intact | EBI-1147604 |
| intact | EBI-891042  |
| intact | EBI-891042  |
| intact | EBI-1147604 |
| intact | EBI-891042  |
| intact | EBI-891042  |
| intact | EBI-1147604 |
| intact | EBI-883876  |
| intact | EBI-883876  |
| intact | EBI-1147604 |

|        |             |
|--------|-------------|
| intact | EBI-892878  |
| intact | EBI-886481  |
| intact | EBI-892878  |
| intact | EBI-886481  |
| intact | EBI-892878  |
| intact | EBI-886481  |
| intact | EBI-1147600 |
| intact | EBI-1147600 |
| intact | EBI-886481  |

|        |            |
|--------|------------|
| intact | EBI-878990 |
| intact | EBI-893104 |
| intact | EBI-878990 |
| intact | EBI-878990 |

|        |             |
|--------|-------------|
| intact | EBI-1147871 |
|--------|-------------|

|        |            |
|--------|------------|
| intact | EBI-881911 |
|--------|------------|

|        |             |
|--------|-------------|
| intact | EBI-1147982 |
|--------|-------------|

|        |             |
|--------|-------------|
| intact | EBI-2369877 |
|--------|-------------|

|        |             |
|--------|-------------|
| intact | EBI-1144399 |

|        |             |
|--------|-------------|
| intact | EBI-1144545 |
| intact | EBI-1144545 |

|        |             |
|--------|-------------|
| intact | EBI-1144649 |

|        |             |
|--------|-------------|
| intact | EBI-1144747 |
| intact | EBI-1144747 |

|        |             |
|--------|-------------|
| intact | EBI-1147695 |
|--------|-------------|

|        |             |
|--------|-------------|
| intact | EBI-1144280 |
| intact | EBI-1144280 |
| intact | EBI-1144280 |
