# Supplementary material
Source: PubMed Central journal article supplement (PMC5108054)
Supplement: NIHMS436991-supplement-S5_MBS_Bait.pdf [file NIHMS436991-supplement-S5_MBS_Bait.pdf]

| Accession | Entry Name | * ID interactor A | ID interactor B | interactor A               | interactor B                |
|-----------|------------|-------------------|-----------------|----------------------------|-----------------------------|
| P00350    | 6PGD_ECOLI | * P00350          | P18843          | <a href="#">6pgd_ecoli</a> | <a href="#">nade_ecoli</a>  |
| P00350    | 6PGD_ECOLI | * P00350          | P22259          | <a href="#">6pgd_ecoli</a> | <a href="#">pcka_ecoli</a>  |
| P00350    | 6PGD_ECOLI | * P00350          | P15288          | <a href="#">6pgd_ecoli</a> | <a href="#">pepd_ecoli</a>  |
| P52697    | 6PGL_ECOLI | * P52697          | P0AAJ3          | <a href="#">6pgl_ecoli</a> | <a href="#">fdnh_ecoli</a>  |
| P52697    | 6PGL_ECOLI | * P52697          | P0A717          | <a href="#">6pgl_ecoli</a> | <a href="#">kprs_ecoli</a>  |
| P52697    | 6PGL_ECOLI | * P52697          | P18843          | <a href="#">6pgl_ecoli</a> | <a href="#">nade_ecoli</a>  |
| P52697    | 6PGL_ECOLI | * P52697          | P0AA43          | <a href="#">6pgl_ecoli</a> | <a href="#">rsua_ecoli</a>  |
| P52697    | 6PGL_ECOLI | * P52697          | P0AD35          | <a href="#">6pgl_ecoli</a> | <a href="#">yfdo_ecoli</a>  |
| P00509    | AAT_ECOLI  | * P00509          | P18843          | <a href="#">aat_ecoli</a>  | <a href="#">nade_ecoli</a>  |
| P0ABD5    | ACCA_ECOLI | * P0ABD5          | P0A9Q5          | <a href="#">acca_ecoli</a> | <a href="#">accd_ecoli</a>  |
| P0ABD5    | ACCA_ECOLI | * P0ABD5          | P0A9Q5          | <a href="#">acca_ecoli</a> | <a href="#">accd_ecoli</a>  |
| P0ABD5    | ACCA_ECOLI | * P0ABD5          | P0A9Q5          | <a href="#">acca_ecoli</a> | <a href="#">accd_ecoli</a>  |
| P0ABD5    | ACCA_ECOLI | * P0ABD5          | P0A6F5          | <a href="#">acca_ecoli</a> | <a href="#">ch60_ecoli</a>  |
| P0ABD5    | ACCA_ECOLI | * P0ABD5          | P0A6Y8          | <a href="#">acca_ecoli</a> | <a href="#">dnak_ecoli</a>  |
| P0ABD5    | ACCA_ECOLI | * P0ABD5          | P36553          | <a href="#">acca_ecoli</a> | <a href="#">hem6_ecoli</a>  |
| P0ABD5    | ACCA_ECOLI | * P0ABD5          | P0A705          | <a href="#">acca_ecoli</a> | <a href="#">if2_ecoli</a>   |
| P0ABD5    | ACCA_ECOLI | * P0ABD5          | P0A717          | <a href="#">acca_ecoli</a> | <a href="#">kprs_ecoli</a>  |
| P0ABD5    | ACCA_ECOLI | * P0ABD5          | P0C018          | <a href="#">acca_ecoli</a> | <a href="#">rl18_ecoli</a>  |
| P0ABD5    | ACCA_ECOLI | * P0ABD5          | P61175          | <a href="#">acca_ecoli</a> | <a href="#">rl22_ecoli</a>  |
| P0ABD5    | ACCA_ECOLI | * P0ABD5          | P0ADZ0          | <a href="#">acca_ecoli</a> | <a href="#">rl23_ecoli</a>  |
| P0ABD5    | ACCA_ECOLI | * P0ABD5          | P60438          | <a href="#">acca_ecoli</a> | <a href="#">rl3_ecoli</a>   |
| P0ABD5    | ACCA_ECOLI | * P0ABD5          | P0A8N5          | <a href="#">acca_ecoli</a> | <a href="#">syk2_ecoli</a>  |
| P24182    | ACCC_ECOLI | * P24182          | P0ABD5          | <a href="#">acc_ecoli</a>  | <a href="#">acca_ecoli</a>  |
| P24182    | ACCC_ECOLI | * P24182          | P0A9Q5          | <a href="#">acc_ecoli</a>  | <a href="#">accd_ecoli</a>  |
| P24182    | ACCC_ECOLI | * P24182          | P0ABD8          | <a href="#">acc_ecoli</a>  | <a href="#">bccp_ecoli</a>  |
| P24182    | ACCC_ECOLI | * P24182          | P0ABD8          | <a href="#">acc_ecoli</a>  | <a href="#">bccp_ecoli</a>  |
| P24182    | ACCC_ECOLI | * P24182          | P0ABD8          | <a href="#">acc_ecoli</a>  | <a href="#">bccp_ecoli</a>  |
| P24182    | ACCC_ECOLI | * P24182          | P16703          | <a href="#">acc_ecoli</a>  | <a href="#">cysm_ecoli</a>  |
| P24182    | ACCC_ECOLI | * P24182          | P0A6Y8          | <a href="#">acc_ecoli</a>  | <a href="#">dnak_ecoli</a>  |
| P24182    | ACCC_ECOLI | * P24182          | P0A988          | <a href="#">acc_ecoli</a>  | <a href="#">dpo3b_ecoli</a> |
| P24182    | ACCC_ECOLI | * P24182          | P0A6W5          | <a href="#">acc_ecoli</a>  | <a href="#">grea_ecoli</a>  |
| P24182    | ACCC_ECOLI | * P24182          | P18843          | <a href="#">acc_ecoli</a>  | <a href="#">nade_ecoli</a>  |
| P24182    | ACCC_ECOLI | * P24182          | P60438          | <a href="#">acc_ecoli</a>  | <a href="#">rl3_ecoli</a>   |
| P24182    | ACCC_ECOLI | * P24182          | P45768          | <a href="#">acc_ecoli</a>  | <a href="#">yhdy_ecoli</a>  |
| P24182    | ACCC_ECOLI | * P24182          | P32160          | <a href="#">acc_ecoli</a>  | <a href="#">yiiq_ecoli</a>  |
| P24182    | ACCC_ECOLI | * P24182          | P32162          | <a href="#">acc_ecoli</a>  | <a href="#">yiis_ecoli</a>  |
| P24182    | ACCC_ECOLI | * P24182          | P45465          | <a href="#">acc_ecoli</a>  | <a href="#">yran_ecoli</a>  |
| P0A9G6    | ACEA_ECOLI | * P0A9G6          | P33937          | <a href="#">acea_ecoli</a> | <a href="#">napa_ecoli</a>  |
| P0A9G6    | ACEA_ECOLI | * P0A9G6          | P60906          | <a href="#">acea_ecoli</a> | <a href="#">syh_ecoli</a>   |

|        |             |          |        |             |             |  |
|--------|-------------|----------|--------|-------------|-------------|--|
| Q46837 | ACFD_ECOLI  | none     |        |             |             |  |
| P0A6A3 | ACKA_ECOLI  | * P0A6A3 | P0AE08 | acka_ecoli  | ahpc_ecoli  |  |
| P0A6A3 | ACKA_ECOLI  | * P0A6A3 | P0A6K3 | acka_ecoli  | def_ecoli   |  |
| P0A6A3 | ACKA_ECOLI  | * P0A6A3 | P0A9A9 | acka_ecoli  | fur_ecoli   |  |
| P0A6A3 | ACKA_ECOLI  | * P0A6A3 | P0A825 | acka_ecoli  | glya_ecoli  |  |
| P0A6A3 | ACKA_ECOLI  | * P0A6A3 | P0A6W5 | acka_ecoli  | grea_ecoli  |  |
| P0A6A3 | ACKA_ECOLI  | * P0A6A3 | P30128 | acka_ecoli  | greb_ecoli  |  |
| P0A6A3 | ACKA_ECOLI  | * P0A6A3 | P09127 | acka_ecoli  | hemx_ecoli  |  |
| P0A6A3 | ACKA_ECOLI  | * P0A6A3 | P0AEW1 | acka_ecoli  | hyfe_ecoli  |  |
| P0A6A3 | ACKA_ECOLI  | * P0A6A3 | P45395 | acka_ecoli  | kdsd_ecoli  |  |
| P0A6A3 | ACKA_ECOLI  | * P0A6A3 | P0A738 | acka_ecoli  | moac_ecoli  |  |
| P0A6A3 | ACKA_ECOLI  | * P0A6A3 | P0A7M2 | acka_ecoli  | rl28_ecoli  |  |
| P0A6A3 | ACKA_ECOLI  | * P0A6A3 | P24252 | acka_ecoli  | ybga_ecoli  |  |
| P25516 | ACON1_ECOLI | * P25516 | P18843 | acon1_ecoli | nade_ecoli  |  |
| P36683 | ACON2_ECOLI | * P36683 | P13458 | acon2_ecoli | sbcc_ecoli  |  |
| P36683 | ACON2_ECOLI | * P36683 | P0A7F6 | acon2_ecoli | sped_ecoli  |  |
| P36683 | ACON2_ECOLI | * P36683 | P69822 | acon2_ecoli | ulab_ecoli  |  |
| P0A6A8 | ACP_ECOLI   | * P0A6A8 | P31119 | acp_ecoli   | aas_ecoli   |  |
| P0A6A8 | ACP_ECOLI   | * P0A6A8 | P0ABD5 | acp_ecoli   | acca_ecoli  |  |
| P0A6A8 | ACP_ECOLI   | * P0A6A8 | P24224 | acp_ecoli   | acps_ecoli  |  |
| P0A6A8 | ACP_ECOLI   | * P0A6A8 | P24224 | acp_ecoli   | acps_ecoli  |  |
| P0A6A8 | ACP_ECOLI   | * P0A6A8 | P0AB65 | acp_ecoli   | acyp_ecoli  |  |
| P0A6A8 | ACP_ECOLI   | * P0A6A8 | P33224 | acp_ecoli   | aidb_ecoli  |  |
| P0A6A8 | ACP_ECOLI   | * P0A6A8 | P33224 | acp_ecoli   | aidb_ecoli  |  |
| P0A6A8 | ACP_ECOLI   | * P0A6A8 | P0ACF4 | acp_ecoli   | dbhb_ecoli  |  |
| P0A6A8 | ACP_ECOLI   | * P0A6A8 | P0A9P0 | acp_ecoli   | dldh_ecoli  |  |
| P0A6A8 | ACP_ECOLI   | * P0A6A8 | P0A9P0 | acp_ecoli   | dldh_ecoli  |  |
| P0A6A8 | ACP_ECOLI   | * P0A6A8 | O32591 | acp_ecoli   | espp_ecolx  |  |
| P0A6A8 | ACP_ECOLI   | * P0A6A8 | P0A953 | acp_ecoli   | fabb_ecoli  |  |
| P0A6A8 | ACP_ECOLI   | * P0A6A8 | P0A953 | acp_ecoli   | fabb_ecoli  |  |
| P0A6A8 | ACP_ECOLI   | * P0A6A8 | P0AAI5 | acp_ecoli   | fabf_ecoli  |  |
| P0A6A8 | ACP_ECOLI   | * P0A6A8 | P0AAI5 | acp_ecoli   | fabf_ecoli  |  |
| P0A6A8 | ACP_ECOLI   | * P0A6A8 | P0AAI5 | acp_ecoli   | fabf_ecoli  |  |
| P0A6A8 | ACP_ECOLI   | * P0A6A8 | P0AEK2 | acp_ecoli   | fabg_ecoli  |  |
| P0A6A8 | ACP_ECOLI   | * P0A6A8 | P0AEK2 | acp_ecoli   | fabg_ecoli  |  |
| P0A6A8 | ACP_ECOLI   | * P0A6A8 | P0A6R0 | acp_ecoli   | fabh_ecoli  |  |
| P0A6A8 | ACP_ECOLI   | * P0A6A8 | P0A6Q6 | acp_ecoli   | fabz_ecoli  |  |
| P0A6A8 | ACP_ECOLI   | * P0A6A8 | P0ACC7 | acp_ecoli   | glmu_ecoli  |  |
| P0A6A8 | ACP_ECOLI   | * P0A6A8 | P0ACC7 | acp_ecoli   | glmu_ecoli  |  |
| P0A6A8 | ACP_ECOLI   | * P0A6A8 | Q47718 | acp_ecoli   | inso2_ecoli |  |

|        |            |      |        |        |            |            |
|--------|------------|------|--------|--------|------------|------------|
| P0A6A8 | ACP_ECOLI  | *    | P0A6A8 | P0A6B7 | acp_ecoli  | iscs_ecoli |
| P0A6A8 | ACP_ECOLI  | *    | P0A6A8 | P21645 | acp_ecoli  | lpxd_ecoli |
| P0A6A8 | ACP_ECOLI  | *    | P0A6A8 | P21645 | acp_ecoli  | lpxd_ecoli |
| P0A6A8 | ACP_ECOLI  | *    | P0A6A8 | P06993 | acp_ecoli  | malt_ecoli |
| P0A6A8 | ACP_ECOLI  | *    | P0A6A8 | P22523 | acp_ecoli  | mukb_ecoli |
| P0A6A8 | ACP_ECOLI  | *    | P0A6A8 | P22523 | acp_ecoli  | mukb_ecoli |
| P0A6A8 | ACP_ECOLI  | *    | P0A6A8 | P0AFG8 | acp_ecoli  | odp1_ecoli |
| P0A6A8 | ACP_ECOLI  | *    | P0A6A8 | P06959 | acp_ecoli  | odp2_ecoli |
| P0A6A8 | ACP_ECOLI  | *    | P0A6A8 | P0A7A7 | acp_ecoli  | plsb_ecoli |
| P0A6A8 | ACP_ECOLI  | *    | P0A6A8 | P0A7A7 | acp_ecoli  | plsb_ecoli |
| P0A6A8 | ACP_ECOLI  | *    | P0A6A8 | P0AB89 | acp_ecoli  | pur8_ecoli |
| P0A6A8 | ACP_ECOLI  | *    | P0A6A8 | P0AG40 | acp_ecoli  | ribf_ecoli |
| P0A6A8 | ACP_ECOLI  | *    | P0A6A8 | P02413 | acp_ecoli  | rl15_ecoli |
| P0A6A8 | ACP_ECOLI  | *    | P0A6A8 | P61175 | acp_ecoli  | rl22_ecoli |
| P0A6A8 | ACP_ECOLI  | *    | P0A6A8 | P0A7M2 | acp_ecoli  | rl28_ecoli |
| P0A6A8 | ACP_ECOLI  | *    | P0A6A8 | P0A7S9 | acp_ecoli  | rs13_ecoli |
| P0A6A8 | ACP_ECOLI  | *    | P0A6A8 | P02358 | acp_ecoli  | rs6_ecoli  |
| P0A6A8 | ACP_ECOLI  | *    | P0A6A8 | P02359 | acp_ecoli  | rs7_ecoli  |
| P0A6A8 | ACP_ECOLI  | *    | P0A6A8 | P02359 | acp_ecoli  | rs7_ecoli  |
| P0A6A8 | ACP_ECOLI  | *    | P0A6A8 | P0A7W7 | acp_ecoli  | rs8_ecoli  |
| P0A6A8 | ACP_ECOLI  | *    | P0A6A8 | P10408 | acp_ecoli  | seca_ecoli |
| P0A6A8 | ACP_ECOLI  | *    | P0A6A8 | P10408 | acp_ecoli  | seca_ecoli |
| P0A6A8 | ACP_ECOLI  | *    | P0A6A8 | P10408 | acp_ecoli  | seca_ecoli |
| P0A6A8 | ACP_ECOLI  | *    | P0A6A8 | P0AG24 | acp_ecoli  | spot_ecoli |
| P0A6A8 | ACP_ECOLI  | *    | P0A6A8 | P0AG24 | acp_ecoli  | spot_ecoli |
| P0A6A8 | ACP_ECOLI  | *    | P0A6A8 | P0A8Z3 | acp_ecoli  | ybgc_ecoli |
| P0A6A8 | ACP_ECOLI  | *    | P0A6A8 | P0A8Z3 | acp_ecoli  | ybgc_ecoli |
| P0A6A8 | ACP_ECOLI  | *    | P0A6A8 | P0A8Z3 | acp_ecoli  | ybgc_ecoli |
| P0A6A8 | ACP_ECOLI  | *    | P0A6A8 | P0A8Z3 | acp_ecoli  | ybgc_ecoli |
| P0A6A8 | ACP_ECOLI  | *    | P0A6A8 | P0A8Z3 | acp_ecoli  | ybgc_ecoli |
| P0A6A8 | ACP_ECOLI  | *    | P0A6A8 | P0A8Z3 | acp_ecoli  | ybgc_ecoli |
| P0A6A8 | ACP_ECOLI  | *    | P0A6A8 | P0AAV4 | acp_ecoli  | ybgj_ecoli |
| P0A6A8 | ACP_ECOLI  | *    | P0A6A8 | P0AGK4 | acp_ecoli  | yhby_ecoli |
| P0A6A8 | ACP_ECOLI  | *    | P0A6A8 | P0ADQ2 | acp_ecoli  | yiid_ecoli |
| P0A6A8 | ACP_ECOLI  | *    | P0A6A8 | P0ADQ2 | acp_ecoli  | yiid_ecoli |
| P24180 | ACRE_ECOLI | none |        |        |            |            |
| P0ACS9 | ACRR_ECOLI | *    | P0ACS9 | P13035 | acrr_ecoli | glpd_ecoli |
| P22333 | ADD_ECOLI  | *    | P22333 | P23325 | add_ecoli  | arpa_ecoli |
| P22333 | ADD_ECOLI  | *    | P22333 | P15877 | add_ecoli  | dhg_ecoli  |
| P22333 | ADD_ECOLI  | *    | P22333 | P15042 | add_ecoli  | dnlj_ecoli |
| P22333 | ADD_ECOLI  | *    | P22333 | P19776 | add_ecoli  | insc_ecoli |
| P22333 | ADD_ECOLI  | *    | P22333 | P0A7L3 | add_ecoli  | rl20_ecoli |
| P22333 | ADD_ECOLI  | *    | P22333 | P0A7S9 | add_ecoli  | rs13_ecoli |

|        |            |          |        |            |              |
|--------|------------|----------|--------|------------|--------------|
| P0A9Q7 | ADHE_ECOLI | * P0A9Q7 | P00722 | adhe_ecoli | bgal_ecoli   |
| P0A9Q7 | ADHE_ECOLI | * P0A9Q7 | P76056 | adhe_ecoli | intr_ecoli   |
| P0A9Q7 | ADHE_ECOLI | * P0A9Q7 | P18843 | adhe_ecoli | nade_ecoli   |
| P0A9Q7 | ADHE_ECOLI | * P0A9Q7 | P60422 | adhe_ecoli | rl2_ecoli    |
| P0A9Q7 | ADHE_ECOLI | * P0A9Q7 | P0A7M2 | adhe_ecoli | rl28_ecoli   |
| P0A9Q7 | ADHE_ECOLI | * P0A9Q7 | P0A7V0 | adhe_ecoli | rs2_ecoli    |
| P0A9Q7 | ADHE_ECOLI | * P0A9Q7 | P0AA43 | adhe_ecoli | rsua_ecoli   |
|        |            |          |        |            |              |
| P19926 | AGP_ECOLI  | * P19926 | P0A6X3 | agp_ecoli  | hfq_ecoli    |
| P19926 | AGP_ECOLI  | * P19926 | P08337 | agp_ecoli  | mutt_ecoli   |
| P19926 | AGP_ECOLI  | * P19926 | P64574 | agp_ecoli  | yghw_ecoli   |
|        |            |          |        |            |              |
| P0AE08 | AHPC_ECOLI | * P0AE08 | P00722 | ahpc_ecoli | bgal_ecoli   |
| P0AE08 | AHPC_ECOLI | * P0AE08 | P08394 | ahpc_ecoli | ex5b_ecoli   |
| P0AE08 | AHPC_ECOLI | * P0AE08 | P37689 | ahpc_ecoli | gpmi_ecoli   |
| P0AE08 | AHPC_ECOLI | * P0AE08 | P0A799 | ahpc_ecoli | pgk_ecoli    |
| P0AE08 | AHPC_ECOLI | * P0AE08 | P16918 | ahpc_ecoli | rhsc_ecoli   |
| P0AE08 | AHPC_ECOLI | * P0AE08 | P24211 | ahpc_ecoli | rhse_ecoli   |
| P0AE08 | AHPC_ECOLI | * P0AE08 | P46850 | ahpc_ecoli | rtcb_ecoli   |
|        |            |          |        |            |              |
| P35340 | AHPF_ECOLI | * P35340 | Q79BD2 | ahpf_ecoli | q79bd2_ecolx |
| P35340 | AHPF_ECOLI | * P35340 | P76161 | ahpf_ecoli | req2_ecoli   |
| P35340 | AHPF_ECOLI | * P35340 | P78271 | ahpf_ecoli | yfes_ecoli   |
|        |            |          |        |            |              |
| Q03155 | AIDA_ECOLX | none     |        |            |              |
|        |            |          |        |            |              |
| P33224 | AIDB_ECOLI | * P33224 | P0A6F5 | aidb_ecoli | ch60_ecoli   |
| P33224 | AIDB_ECOLI | * P33224 | P0A6F5 | aidb_ecoli | ch60_ecoli   |
| P33224 | AIDB_ECOLI | * P33224 | P0A6Y8 | aidb_ecoli | dnak_ecoli   |
| P33224 | AIDB_ECOLI | * P33224 | P0A6Y8 | aidb_ecoli | dnak_ecoli   |
| P33224 | AIDB_ECOLI | * P33224 | P67910 | aidb_ecoli | hldd_ecoli   |
| P33224 | AIDB_ECOLI | * P33224 | P06959 | aidb_ecoli | odp2_ecoli   |
| P33224 | AIDB_ECOLI | * P33224 | P06959 | aidb_ecoli | odp2_ecoli   |
| P33224 | AIDB_ECOLI | * P33224 | P0A7L0 | aidb_ecoli | rl1_ecoli    |
| P33224 | AIDB_ECOLI | * P33224 | P0AA10 | aidb_ecoli | rl13_ecoli   |
| P33224 | AIDB_ECOLI | * P33224 | P0A7K6 | aidb_ecoli | rl19_ecoli   |
| P33224 | AIDB_ECOLI | * P33224 | P0AG48 | aidb_ecoli | rl21_ecoli   |
| P33224 | AIDB_ECOLI | * P33224 | P61175 | aidb_ecoli | rl22_ecoli   |
| P33224 | AIDB_ECOLI | * P33224 | P0A7M2 | aidb_ecoli | rl28_ecoli   |
| P33224 | AIDB_ECOLI | * P33224 | P60438 | aidb_ecoli | rl3_ecoli    |
| P33224 | AIDB_ECOLI | * P33224 | P60438 | aidb_ecoli | rl3_ecoli    |
| P33224 | AIDB_ECOLI | * P33224 | P0A7S3 | aidb_ecoli | rs12_ecoli   |
| P33224 | AIDB_ECOLI | * P33224 | P0AG59 | aidb_ecoli | rs14_ecoli   |
| P33224 | AIDB_ECOLI | * P33224 | P0A7U3 | aidb_ecoli | rs19_ecoli   |

|        |            |      |        |        |            |            |
|--------|------------|------|--------|--------|------------|------------|
| P33224 | AIDB_ECOLI | *    | P33224 | P0A7V0 | aidb_ecoli | rs2_ecoli  |
| P33224 | AIDB_ECOLI | *    | P33224 | P0A7U7 | aidb_ecoli | rs20_ecoli |
| P33224 | AIDB_ECOLI | *    | P33224 | P0A7V8 | aidb_ecoli | rs4_ecoli  |
| P33224 | AIDB_ECOLI | *    | P33224 | P0A7W1 | aidb_ecoli | rs5_ecoli  |
| P33224 | AIDB_ECOLI | *    | P33224 | P02358 | aidb_ecoli | rs6_ecoli  |
| P33224 | AIDB_ECOLI | *    | P33224 | P02359 | aidb_ecoli | rs7_ecoli  |
| P33224 | AIDB_ECOLI | *    | P33224 | P0AGK4 | aidb_ecoli | yhby_ecoli |
| P33224 | AIDB_ECOLI | *    | P33224 | P0AF90 | aidb_ecoli | yjgd_ecoli |
|        |            |      |        |        |            |            |
| P00561 | AK1H_ECOLI | *    | P00561 | P35340 | ak1h_ecoli | ahpf_ecoli |
| P00561 | AK1H_ECOLI | *    | P00561 | P13035 | ak1h_ecoli | glpd_ecoli |
|        |            |      |        |        |            |            |
| P08660 | AK3_ECOLI  | none |        |        |            |            |
|        |            |      |        |        |            |            |
| P0AB71 | ALF_ECOLI  | *    | P0AB71 | P0A6Y8 | alf_ecoli  | dnak_ecoli |
| P0AB71 | ALF_ECOLI  | *    | P0AB71 | P0A6Y8 | alf_ecoli  | dnak_ecoli |
| P0AB71 | ALF_ECOLI  | *    | P0AB71 | P61949 | alf_ecoli  | flav_ecoli |
| P0AB71 | ALF_ECOLI  | *    | P0AB71 | P0A7V0 | alf_ecoli  | rs2_ecoli  |
| P0AB71 | ALF_ECOLI  | *    | P0AB71 | P08956 | alf_ecoli  | t1rk_ecoli |
| P0AB71 | ALF_ECOLI  | *    | P0AB71 | P0ACR7 | alf_ecoli  | yfer_ecoli |
|        |            |      |        |        |            |            |
| P0A991 | ALF1_ECOLI | *    | P0A991 | P08622 | alf1_ecoli | dnaj_ecoli |
| P0A991 | ALF1_ECOLI | *    | P0A991 | P0A6Y8 | alf1_ecoli | dnak_ecoli |
| P0A991 | ALF1_ECOLI | *    | P0A991 | P77395 | alf1_ecoli | ybbn_ecoli |
| P0A991 | ALF1_ECOLI | *    | P0A991 | P77395 | alf1_ecoli | ybbn_ecoli |
|        |            |      |        |        |            |            |
| P0A955 | ALKH_ECOLI | *    | P0A955 | P00722 | alkh_ecoli | bgal_ecoli |
| P0A955 | ALKH_ECOLI | *    | P0A955 | P06611 | alkh_ecoli | btud_ecoli |
| P0A955 | ALKH_ECOLI | *    | P0A955 | P0A6F5 | alkh_ecoli | ch60_ecoli |
| P0A955 | ALKH_ECOLI | *    | P0A955 | P31678 | alkh_ecoli | otsb_ecoli |
| P0A955 | ALKH_ECOLI | *    | P0A955 | P16916 | alkh_ecoli | rhsa_ecoli |
| P0A955 | ALKH_ECOLI | *    | P0A955 | P60422 | alkh_ecoli | rl2_ecoli  |
| P0A955 | ALKH_ECOLI | *    | P0A955 | P75989 | alkh_ecoli | ycge_ecoli |
|        |            |      |        |        |            |            |
| P77425 | ALLC_ECOLI | *    | P77425 | P0C8K0 | allc_ecoli | kbaz_ecoli |
| P77425 | ALLC_ECOLI | *    | P77425 | P18843 | allc_ecoli | nade_ecoli |
| P77425 | ALLC_ECOLI | *    | P77425 | P0A7U7 | allc_ecoli | rs20_ecoli |
| P77425 | ALLC_ECOLI | *    | P77425 | P0A870 | allc_ecoli | talb_ecoli |
| P77425 | ALLC_ECOLI | *    | P77425 | P0AED5 | allc_ecoli | uvry_ecoli |
|        |            |      |        |        |            |            |
| P0ACN4 | ALLR_ECOLI | *    | P0ACN4 | P0ACF0 | allr_ecoli | dbha_ecoli |
| P0ACN4 | ALLR_ECOLI | *    | P0ACN4 | P0AC41 | allr_ecoli | dhsa_ecoli |
| P0ACN4 | ALLR_ECOLI | *    | P0ACN4 | P0A6F3 | allr_ecoli | glpk_ecoli |
| P0ACN4 | ALLR_ECOLI | *    | P0ACN4 | P0A7L0 | allr_ecoli | rl1_ecoli  |
| P0ACN4 | ALLR_ECOLI | *    | P0ACN4 | P0C018 | allr_ecoli | rl18_ecoli |

|        |            |      |        |        |            |            |
|--------|------------|------|--------|--------|------------|------------|
| P0ACN4 | ALLR_ECOLI | *    | P0ACN4 | P0A7K6 | allr_ecoli | rl19_ecoli |
| P0ACN4 | ALLR_ECOLI | *    | P0ACN4 | P60422 | allr_ecoli | rl2_ecoli  |
| P0ACN4 | ALLR_ECOLI | *    | P0ACN4 | P0AG48 | allr_ecoli | rl21_ecoli |
| P0ACN4 | ALLR_ECOLI | *    | P0ACN4 | P60624 | allr_ecoli | rl24_ecoli |
| P0ACN4 | ALLR_ECOLI | *    | P0ACN4 | P0AG71 | allr_ecoli | rmuc_ecoli |
| P0ACN4 | ALLR_ECOLI | *    | P0ACN4 | P0A7S3 | allr_ecoli | rs12_ecoli |
| P0ACN4 | ALLR_ECOLI | *    | P0ACN4 | P0A7S9 | allr_ecoli | rs13_ecoli |
| P0ACN4 | ALLR_ECOLI | *    | P0ACN4 | P0AG59 | allr_ecoli | rs14_ecoli |
| P0ACN4 | ALLR_ECOLI | *    | P0ACN4 | P0ADZ4 | allr_ecoli | rs15_ecoli |
| P0ACN4 | ALLR_ECOLI | *    | P0ACN4 | P0A7W1 | allr_ecoli | rs5_ecoli  |
| P0ACN4 | ALLR_ECOLI | *    | P0ACN4 | P02358 | allr_ecoli | rs6_ecoli  |
| P0ACN4 | ALLR_ECOLI | *    | P0ACN4 | P02359 | allr_ecoli | rs7_ecoli  |
| P0ACN4 | ALLR_ECOLI | *    | P0ACN4 | P0A843 | allr_ecoli | tate_ecoli |
|        |            |      |        |        |            |            |
| P36548 | AMIA_ECOLI | *    | P36548 | P18843 | amia_ecoli | nade_ecoli |
| P36548 | AMIA_ECOLI | *    | P36548 | P60723 | amia_ecoli | rl4_ecoli  |
|        |            |      |        |        |            |            |
| P63883 | AMIC_ECOLI | none |        |        |            |            |
|        |            |      |        |        |            |            |
| P0AE12 | AMN_ECOLI  | *    | P0AE12 | P0A6F5 | amn_ecoli  | ch60_ecoli |
| P0AE12 | AMN_ECOLI  | *    | P0AE12 | P37024 | amn_ecoli  | hrpb_ecoli |
| P0AE12 | AMN_ECOLI  | *    | P0AE12 | P0AD96 | amn_ecoli  | livj_ecoli |
| P0AE12 | AMN_ECOLI  | *    | P0AE12 | P77257 | amn_ecoli  | lsra_ecoli |
| P0AE12 | AMN_ECOLI  | *    | P0AE12 | P17888 | amn_ecoli  | pria_ecoli |
| P0AE12 | AMN_ECOLI  | *    | P0AE12 | P10408 | amn_ecoli  | seca_ecoli |
|        |            |      |        |        |            |            |
| P68767 | AMPA_ECOLI | *    | P68767 | P00722 | ampa_ecoli | bgal_ecoli |
| P68767 | AMPA_ECOLI | *    | P68767 | P0AFG6 | ampa_ecoli | odo2_ecoli |
| P68767 | AMPA_ECOLI | *    | P68767 | P0A786 | ampa_ecoli | pyrb_ecoli |
|        |            |      |        |        |            |            |
| P13016 | AMPD_ECOLI | none |        |        |            |            |
|        |            |      |        |        |            |            |
| P0AD70 | AMPH_ECOLI | none |        |        |            |            |
|        |            |      |        |        |            |            |
| P0AE18 | AMPM_ECOLI | *    | P0AE18 | P0A9P6 | ampm_ecoli | dead_ecoli |
| P0AE18 | AMPM_ECOLI | *    | P0AE18 | P04425 | ampm_ecoli | gshb_ecoli |
| P0AE18 | AMPM_ECOLI | *    | P0AE18 | P77791 | ampm_ecoli | maa_ecoli  |
| P0AE18 | AMPM_ECOLI | *    | P0AE18 | P76398 | ampm_ecoli | mdtb_ecoli |
| P0AE18 | AMPM_ECOLI | *    | P0AE18 | P15032 | ampm_ecoli | rece_ecoli |
| P0AE18 | AMPM_ECOLI | *    | P0AE18 | P0AA10 | ampm_ecoli | rl13_ecoli |
| P0AE18 | AMPM_ECOLI | *    | P0AE18 | P0A7K6 | ampm_ecoli | rl19_ecoli |
| P0AE18 | AMPM_ECOLI | *    | P0AE18 | P61175 | ampm_ecoli | rl22_ecoli |
| P0AE18 | AMPM_ECOLI | *    | P0AE18 | P0ADZ0 | ampm_ecoli | rl23_ecoli |
| P0AE18 | AMPM_ECOLI | *    | P0AE18 | P0A7M2 | ampm_ecoli | rl28_ecoli |
| P0AE18 | AMPM_ECOLI | *    | P0AE18 | P0A7N9 | ampm_ecoli | rl33_ecoli |

|        |            |   |        |        |            |            |
|--------|------------|---|--------|--------|------------|------------|
| P0AE18 | AMPM_ECOLI | * | P0AE18 | P60723 | ampm_ecoli | rl4_ecoli  |
| P0AE18 | AMPM_ECOLI | * | P0AE18 | P0A7K2 | ampm_ecoli | rl7_ecoli  |
| P0AE18 | AMPM_ECOLI | * | P0AE18 | P0A7R1 | ampm_ecoli | rl9_ecoli  |
| P0AE18 | AMPM_ECOLI | * | P0AE18 | P0A7R5 | ampm_ecoli | rs10_ecoli |
| P0AE18 | AMPM_ECOLI | * | P0AE18 | P0A7T3 | ampm_ecoli | rs16_ecoli |
| P0AE18 | AMPM_ECOLI | * | P0AE18 | P0A7V0 | ampm_ecoli | rs2_ecoli  |
| P0AE18 | AMPM_ECOLI | * | P0AE18 | P0A7U7 | ampm_ecoli | rs20_ecoli |
| P0AE18 | AMPM_ECOLI | * | P0AE18 | P0A7W1 | ampm_ecoli | rs5_ecoli  |
| P0AE18 | AMPM_ECOLI | * | P0AE18 | P0ACT6 | ampm_ecoli | uidr_ecoli |
| P0AE18 | AMPM_ECOLI | * | P0AE18 | P76245 | ampm_ecoli | yeap_ecoli |
| P0AE18 | AMPM_ECOLI | * | P0AE18 | P0AGK4 | ampm_ecoli | yhby_ecoli |
| P04825 | AMPN_ECOLI | * | P04825 | P0A6F5 | ampn_ecoli | ch60_ecoli |
| P04825 | AMPN_ECOLI | * | P04825 | P77329 | ampn_ecoli | hyfg_ecoli |
| P04825 | AMPN_ECOLI | * | P04825 | P0AA43 | ampn_ecoli | rsua_ecoli |
| P04825 | AMPN_ECOLI | * | P04825 | P42592 | ampn_ecoli | ygjk_ecoli |
| P62672 | APAG_ECOLI |   | none   |        |            |            |
| P69503 | APT_ECOLI  | * | P69503 | P45568 | apt_ecoli  | dxr_ecoli  |
| P69503 | APT_ECOLI  | * | P69503 | P0C8J8 | apt_ecoli  | gatz_ecoli |
| P69503 | APT_ECOLI  | * | P69503 | P0AF06 | apt_ecoli  | motb_ecoli |
| P0A9Q1 | ARCA_ECOLI | * | P0A9Q1 | P0A717 | arca_ecoli | kprs_ecoli |
| P0A6C8 | ARGB_ECOLI |   | none   |        |            |            |
| P77690 | ARNB_ECOLI |   | none   |        |            |            |
| P07639 | AROB_ECOLI | * | P07639 | P0A6F5 | arob_ecoli | ch60_ecoli |
| P07639 | AROB_ECOLI | * | P07639 | P0AAJ3 | arob_ecoli | fdnh_ecoli |
| P07639 | AROB_ECOLI | * | P07639 | P39369 | arob_ecoli | yjhr_ecoli |
| P15770 | AROE_ECOLI | * | P15770 | P18843 | aroe_ecoli | nade_ecoli |
| P15770 | AROE_ECOLI | * | P15770 | P31064 | aroe_ecoli | yede_ecoli |
| P15770 | AROE_ECOLI | * | P15770 | P45545 | aroe_ecoli | yhfs_ecoli |
| P0A6D7 | AROK_ECOLI |   | none   |        |            |            |
| P0AE28 | AROM_ECOLI | * | P0AE28 | P0ADY3 | arom_ecoli | rl14_ecoli |
| P0AE28 | AROM_ECOLI | * | P0AE28 | P0A7M2 | arom_ecoli | rl28_ecoli |
| P0AE28 | AROM_ECOLI | * | P0AE28 | P0A8D3 | arom_ecoli | yaii_ecoli |
| P76205 | ARPB_ECOLI |   | none   |        |            |            |



|        |             |      |        |        |             |             |
|--------|-------------|------|--------|--------|-------------|-------------|
| P00963 | ASNA_ECOLI  | *    | P00963 | P23721 | asna_ecoli  | serc_ecoli  |
| P0ACI6 | ASNC_ECOLI  | *    | P0ACI6 | P31658 | asnc_ecoli  | hcha_ecoli  |
| P00805 | ASPG2_ECOLI | *    | P00805 | P37246 | aspg2_ecoli | insi_ecoli  |
| P00805 | ASPG2_ECOLI | *    | P00805 | P25535 | aspg2_ecoli | visc_ecoli  |
| P36560 | ASR_ECOLI   | none |        |        |             |             |
| POABB0 | ATPA_ECOLI  | *    | POABB0 | POABB4 | atpa_ecoli  | atpb_ecoli  |
| POABB0 | ATPA_ECOLI  | *    | POABB0 | POABB4 | atpa_ecoli  | atpb_ecoli  |
| POABB0 | ATPA_ECOLI  | *    | POABB0 | POABB4 | atpa_ecoli  | atpb_ecoli  |
| POABB0 | ATPA_ECOLI  | *    | POABB0 | POABB4 | atpa_ecoli  | atpb_ecoli  |
| POABB0 | ATPA_ECOLI  | *    | POABB0 | POABB4 | atpa_ecoli  | atpb_ecoli  |
| POABB0 | ATPA_ECOLI  | *    | POABB0 | POABA0 | atpa_ecoli  | atpf_ecoli  |
| POABB0 | ATPA_ECOLI  | *    | POABB0 | POABA6 | atpa_ecoli  | atpg_ecoli  |
| POABB0 | ATPA_ECOLI  | *    | POABB0 | POABA6 | atpa_ecoli  | atpg_ecoli  |
| POABB0 | ATPA_ECOLI  | *    | POABB0 | P68699 | atpa_ecoli  | atpl_ecoli  |
| POABB0 | ATPA_ECOLI  | *    | POABB0 | P0A6J5 | atpa_ecoli  | dada_ecoli  |
| POABB0 | ATPA_ECOLI  | *    | POABB0 | P0A6J5 | atpa_ecoli  | dada_ecoli  |
| POABB0 | ATPA_ECOLI  | *    | POABB0 | P0ACC7 | atpa_ecoli  | glmu_ecoli  |
| POABB0 | ATPA_ECOLI  | *    | POABB0 | P37095 | atpa_ecoli  | pepb_ecoli  |
| POABB0 | ATPA_ECOLI  | *    | POABB0 | P0A7E1 | atpa_ecoli  | pyrd_ecoli  |
| POABB0 | ATPA_ECOLI  | *    | POABB0 | P0A7E1 | atpa_ecoli  | pyrd_ecoli  |
| POABB0 | ATPA_ECOLI  | *    | POABB0 | P0A7L0 | atpa_ecoli  | rl1_ecoli   |
| POABB0 | ATPA_ECOLI  | *    | POABB0 | P0A7R1 | atpa_ecoli  | rl9_ecoli   |
| POABB0 | ATPA_ECOLI  | *    | POABB0 | P37744 | atpa_ecoli  | rmla1_ecoli |
| POABB4 | ATPB_ECOLI  | *    | POABB4 | POABB0 | atpb_ecoli  | atpa_ecoli  |
| POABB4 | ATPB_ECOLI  | *    | POABB4 | POABB0 | atpb_ecoli  | atpa_ecoli  |
| POABB4 | ATPB_ECOLI  | *    | POABB4 | P0A9A6 | atpb_ecoli  | ftsz_ecoli  |
| POABB4 | ATPB_ECOLI  | *    | POABB4 | P13035 | atpb_ecoli  | glpd_ecoli  |
| POABB4 | ATPB_ECOLI  | *    | POABB4 | P0A7G6 | atpb_ecoli  | reca_ecoli  |
| POABB4 | ATPB_ECOLI  | *    | POABB4 | P0AG30 | atpb_ecoli  | rho_ecoli   |
| POABB4 | ATPB_ECOLI  | *    | POABB4 | P62399 | atpb_ecoli  | rl5_ecoli   |
| POABB4 | ATPB_ECOLI  | *    | POABB4 | P0AG55 | atpb_ecoli  | rl6_ecoli   |
| POABB4 | ATPB_ECOLI  | *    | POABB4 | P0A7V0 | atpb_ecoli  | rs2_ecoli   |
| POABA0 | ATPF_ECOLI  | none |        |        |             |             |
| POABA6 | ATPG_ECOLI  | *    | POABA6 | POABB0 | atpg_ecoli  | atpa_ecoli  |
| POABA6 | ATPG_ECOLI  | *    | POABA6 | POABB0 | atpg_ecoli  | atpa_ecoli  |
| POABA6 | ATPG_ECOLI  | *    | POABA6 | POABB4 | atpg_ecoli  | atpb_ecoli  |
| POABA6 | ATPG_ECOLI  | *    | POABA6 | P0A6E6 | atpg_ecoli  | atpe_ecoli  |
| POABA6 | ATPG_ECOLI  | *    | POABA6 | P0A6E6 | atpg_ecoli  | atpe_ecoli  |



|        |            |   |        |        |             |             |
|--------|------------|---|--------|--------|-------------|-------------|
| P0ABA6 | ATPG_ECOLI | * | P0ABA6 | P0ADZ0 | atpg_ecoli  | rl23_ecoli  |
| P68699 | ATPL_ECOLI |   | none   |        |             |             |
| P37617 | ATZN_ECOLI | * | P37617 | P63284 | atzn_ecoli  | clpb_ecoli  |
| P37617 | ATZN_ECOLI | * | P37617 | P15031 | atzn_ecoli  | fece_ecoli  |
| P37617 | ATZN_ECOLI | * | P37617 | P09831 | atzn_ecoli  | gltb_ecoli  |
| P37617 | ATZN_ECOLI | * | P37617 | P0A9M0 | atzn_ecoli  | lon_ecoli   |
| P37617 | ATZN_ECOLI | * | P37617 | P0A870 | atzn_ecoli  | talb_ecoli  |
| P37617 | ATZN_ECOLI | * | P37617 | P27836 | atzn_ecoli  | wecg_ecoli  |
| P37617 | ATZN_ECOLI | * | P37617 | P76344 | atzn_ecoli  | yoda_ecoli  |
| P41407 | AZOR_ECOLI |   | none   |        |             |             |
| P30847 | BAES_ECOLI |   | none   |        |             |             |
| P30843 | BASR_ECOLI | * | P30843 | P0A717 | basr_ecoli  | kprs_ecoli  |
| P30843 | BASR_ECOLI | * | P30843 | P0AA43 | basr_ecoli  | rsua_ecoli  |
| P30843 | BASR_ECOLI | * | P30843 | P15082 | basr_ecoli  | srlr_ecoli  |
| P30843 | BASR_ECOLI | * | P30843 | P76177 | basr_ecoli  | ydgh_ecoli  |
| P0AE52 | BCP_ECOLI  | * | P0AE52 | P05194 | bcp_ecoli   | arod_ecoli  |
| P0AE52 | BCP_ECOLI  | * | P0AE52 | P0A9F3 | bcp_ecoli   | cysb_ecoli  |
| P0AE52 | BCP_ECOLI  | * | P0AE52 | P08409 | bcp_ecoli   | insl_ecoli  |
| P0AE52 | BCP_ECOLI  | * | P0AE52 | P08409 | bcp_ecoli   | insl_ecoli  |
| P0AE52 | BCP_ECOLI  | * | P0AE52 | P18843 | bcp_ecoli   | nade_ecoli  |
| P0AE52 | BCP_ECOLI  | * | P0AE52 | P39406 | bcp_ecoli   | rsmc_ecoli  |
| P0AE52 | BCP_ECOLI  | * | P0AE52 | P0A8N0 | bcp_ecoli   | ycbg_ecoli  |
| P37652 | BCSB_ECOLI |   | none   |        |             |             |
| P17445 | BETB_ECOLI | * | P17445 | P08394 | betb_ecoli  | ex5b_ecoli  |
| P17445 | BETB_ECOLI | * | P17445 | P0ACB4 | betb_ecoli  | hemg_ecoli  |
| P17445 | BETB_ECOLI | * | P17445 | P16690 | betb_ecoli  | phnn_ecoli  |
| P17445 | BETB_ECOLI | * | P17445 | P16916 | betb_ecoli  | rhsa_ecoli  |
| P17445 | BETB_ECOLI | * | P17445 | P0A948 | betb_ecoli  | rimj_ecoli  |
| P17445 | BETB_ECOLI | * | P17445 | P37765 | betb_ecoli  | rlub_ecoli  |
| P0ABD3 | BFR_ECOLI  | * | P0ABD3 | P50456 | bfr_ecoli   | mlc_ecoli   |
| P0ABD3 | BFR_ECOLI  | * | P0ABD3 | P08373 | bfr_ecoli   | murb_ecoli  |
| P06864 | BGA2_ECOLI |   | none   |        |             |             |
| Q46829 | BGLA_ECOLI | * | Q46829 | P10443 | bgl_a_ecoli | dpo3a_ecoli |
| Q46829 | BGLA_ECOLI | * | Q46829 | P18843 | bgl_a_ecoli | nade_ecoli  |

|        |             |          |        |            |             |
|--------|-------------|----------|--------|------------|-------------|
| P12995 | BIOA_ECOLI  | * P12995 | P0A6F5 | bioa_ecoli | ch60_ecoli  |
| P12995 | BIOA_ECOLI  | * P12995 | P10443 | bioa_ecoli | dpo3a_ecoli |
| P12995 | BIOA_ECOLI  | * P12995 | P0A717 | bioa_ecoli | kprs_ecoli  |
| P12995 | BIOA_ECOLI  | * P12995 | P33602 | bioa_ecoli | nuog_ecoli  |
| P12996 | BIOB_ECOLI  | * P12996 | P0A6Y8 | biob_ecoli | dnak_ecoli  |
| P12996 | BIOB_ECOLI  | * P12996 | P18843 | biob_ecoli | nade_ecoli  |
| P0A6E9 | BIOD2_ECOLI | none     |        |            |             |
| P13001 | BIOH_ECOLI  | * P13001 | P0A6F5 | bioh_ecoli | ch60_ecoli  |
| P13001 | BIOH_ECOLI  | * P13001 | P0AC53 | bioh_ecoli | g6pd_ecoli  |
| P13001 | BIOH_ECOLI  | * P13001 | P0AFG6 | bioh_ecoli | odo2_ecoli  |
| P06610 | BTUE_ECOLI  | * P06610 | P0A6F5 | btue_ecoli | ch60_ecoli  |
| P06610 | BTUE_ECOLI  | * P06610 | P08622 | btue_ecoli | dnaj_ecoli  |
| P06610 | BTUE_ECOLI  | * P06610 | P0A8J2 | btue_ecoli | dnat_ecoli  |
| P06610 | BTUE_ECOLI  | * P06610 | P0AD68 | btue_ecoli | ftsi_ecoli  |
| P06610 | BTUE_ECOLI  | * P06610 | P75958 | btue_ecoli | lole_ecoli  |
| P06610 | BTUE_ECOLI  | * P06610 | P18843 | btue_ecoli | nade_ecoli  |
| P06610 | BTUE_ECOLI  | * P06610 | P60422 | btue_ecoli | rl2_ecoli   |
| P06610 | BTUE_ECOLI  | * P06610 | P62399 | btue_ecoli | rl5_ecoli   |
| P06610 | BTUE_ECOLI  | * P06610 | P0A7V0 | btue_ecoli | rs2_ecoli   |
| P06610 | BTUE_ECOLI  | * P06610 | P0A7V3 | btue_ecoli | rs3_ecoli   |
| P06610 | BTUE_ECOLI  | * P06610 | P0A7W1 | btue_ecoli | rs5_ecoli   |
| P06610 | BTUE_ECOLI  | * P06610 | P21363 | btue_ecoli | ycie_ecoli  |
| P06610 | BTUE_ECOLI  | * P06610 | P76121 | btue_ecoli | yddh_ecoli  |
| P06610 | BTUE_ECOLI  | * P06610 | P52043 | btue_ecoli | ygfh_ecoli  |
| P06610 | BTUE_ECOLI  | * P06610 | P67601 | btue_ecoli | yobd_ecoli  |
| P0AAE8 | CADB_ECOLI  | none     |        |            |             |
| P31572 | CAIB_ECOLI  | * P31572 | P0AC41 | caib_ecoli | dhsa_ecoli  |
| P31572 | CAIB_ECOLI  | * P31572 | P06149 | caib_ecoli | dld_ecoli   |
| P31572 | CAIB_ECOLI  | * P31572 | P16916 | caib_ecoli | rhsa_ecoli  |
| P31572 | CAIB_ECOLI  | * P31572 | P16919 | caib_ecoli | rhsd_ecoli  |
| P21179 | CATE_ECOLI  | * P21179 | P0A6F5 | cate_ecoli | ch60_ecoli  |
| P21179 | CATE_ECOLI  | * P21179 | P08394 | cate_ecoli | ex5b_ecoli  |
| P21179 | CATE_ECOLI  | * P21179 | P0A9A9 | cate_ecoli | fur_ecoli   |
| P21179 | CATE_ECOLI  | * P21179 | P27249 | cate_ecoli | glnD_ecoli  |
| P21179 | CATE_ECOLI  | * P21179 | P30015 | cate_ecoli | lhr_ecoli   |
| P21179 | CATE_ECOLI  | * P21179 | P24174 | cate_ecoli | manc_ecoli  |
| P21179 | CATE_ECOLI  | * P21179 | P75864 | cate_ecoli | rlmI_ecoli  |

|        |            |   |        |        |            |             |
|--------|------------|---|--------|--------|------------|-------------|
| P21179 | CATE_ECOLI | * | P21179 | P76148 | cate_ecoli | yneg_ecoli  |
| P36659 | CBPA_ECOLI | * | P36659 | P33224 | cbpa_ecoli | aidb_ecoli  |
| P36659 | CBPA_ECOLI | * | P36659 | P0A6F5 | cbpa_ecoli | ch60_ecoli  |
| P36659 | CBPA_ECOLI | * | P36659 | P0ABH9 | cbpa_ecoli | clpa_ecoli  |
| P36659 | CBPA_ECOLI | * | P36659 | P63284 | cbpa_ecoli | clpb_ecoli  |
| P36659 | CBPA_ECOLI | * | P36659 | P0A9P6 | cbpa_ecoli | dead_ecoli  |
| P36659 | CBPA_ECOLI | * | P36659 | P0A6Y8 | cbpa_ecoli | dnak_ecoli  |
| P36659 | CBPA_ECOLI | * | P36659 | P0A6Y8 | cbpa_ecoli | dnak_ecoli  |
| P36659 | CBPA_ECOLI | * | P36659 | P0A6Y8 | cbpa_ecoli | dnak_ecoli  |
| P36659 | CBPA_ECOLI | * | P36659 | P0CE47 | cbpa_ecoli | eftu1_ecoli |
| P36659 | CBPA_ECOLI | * | P36659 | P0A6Q6 | cbpa_ecoli | fabz_ecoli  |
| P36659 | CBPA_ECOLI | * | P36659 | P0A6Z1 | cbpa_ecoli | hsca_ecoli  |
| P36659 | CBPA_ECOLI | * | P36659 | P0A707 | cbpa_ecoli | if3_ecoli   |
| P36659 | CBPA_ECOLI | * | P36659 | P0A9M0 | cbpa_ecoli | lon_ecoli   |
| P36659 | CBPA_ECOLI | * | P36659 | P0A817 | cbpa_ecoli | metk_ecoli  |
| P36659 | CBPA_ECOLI | * | P36659 | P22523 | cbpa_ecoli | mukb_ecoli  |
| P36659 | CBPA_ECOLI | * | P36659 | P18843 | cbpa_ecoli | nade_ecoli  |
| P36659 | CBPA_ECOLI | * | P36659 | P42184 | cbpa_ecoli | prsa_ecolx  |
| P36659 | CBPA_ECOLI | * | P36659 | P0A9J6 | cbpa_ecoli | rbsk_ecoli  |
| P36659 | CBPA_ECOLI | * | P36659 | P0AG30 | cbpa_ecoli | rho_ecoli   |
| P36659 | CBPA_ECOLI | * | P36659 | P0A7L0 | cbpa_ecoli | rl1_ecoli   |
| P36659 | CBPA_ECOLI | * | P36659 | P0A7K6 | cbpa_ecoli | rl19_ecoli  |
| P36659 | CBPA_ECOLI | * | P36659 | P60422 | cbpa_ecoli | rl2_ecoli   |
| P36659 | CBPA_ECOLI | * | P36659 | P60422 | cbpa_ecoli | rl2_ecoli   |
| P36659 | CBPA_ECOLI | * | P36659 | P61175 | cbpa_ecoli | rl22_ecoli  |
| P36659 | CBPA_ECOLI | * | P36659 | P60624 | cbpa_ecoli | rl24_ecoli  |
| P36659 | CBPA_ECOLI | * | P36659 | P0A7M6 | cbpa_ecoli | rl29_ecoli  |
| P36659 | CBPA_ECOLI | * | P36659 | P60438 | cbpa_ecoli | rl3_ecoli   |
| P36659 | CBPA_ECOLI | * | P36659 | P0A7N9 | cbpa_ecoli | rl33_ecoli  |
| P36659 | CBPA_ECOLI | * | P36659 | P60723 | cbpa_ecoli | rl4_ecoli   |
| P36659 | CBPA_ECOLI | * | P36659 | P60723 | cbpa_ecoli | rl4_ecoli   |
| P36659 | CBPA_ECOLI | * | P36659 | P62399 | cbpa_ecoli | rl5_ecoli   |
| P36659 | CBPA_ECOLI | * | P36659 | P0AG55 | cbpa_ecoli | rl6_ecoli   |
| P36659 | CBPA_ECOLI | * | P36659 | P0A7K2 | cbpa_ecoli | rl7_ecoli   |
| P36659 | CBPA_ECOLI | * | P36659 | P0A7R1 | cbpa_ecoli | rl9_ecoli   |
| P36659 | CBPA_ECOLI | * | P36659 | P0A8T7 | cbpa_ecoli | rpoc_ecoli  |
| P36659 | CBPA_ECOLI | * | P36659 | P0AG67 | cbpa_ecoli | rs1_ecoli   |
| P36659 | CBPA_ECOLI | * | P36659 | P0A7S9 | cbpa_ecoli | rs13_ecoli  |
| P36659 | CBPA_ECOLI | * | P36659 | P0A7T3 | cbpa_ecoli | rs16_ecoli  |
| P36659 | CBPA_ECOLI | * | P36659 | P0A7V0 | cbpa_ecoli | rs2_ecoli   |
| P36659 | CBPA_ECOLI | * | P36659 | P0A7V0 | cbpa_ecoli | rs2_ecoli   |
| P36659 | CBPA_ECOLI | * | P36659 | P0A7V3 | cbpa_ecoli | rs3_ecoli   |
| P36659 | CBPA_ECOLI | * | P36659 | P0A7V8 | cbpa_ecoli | rs4_ecoli   |
| P36659 | CBPA_ECOLI | * | P36659 | P0A7W1 | cbpa_ecoli | rs5_ecoli   |

|        |            |      |        |        |            |            |
|--------|------------|------|--------|--------|------------|------------|
| P36659 | CBPA_ECOLI | *    | P36659 | P02359 | cbpa_ecoli | rs7_ecoli  |
| P36659 | CBPA_ECOLI | *    | P36659 | P02359 | cbpa_ecoli | rs7_ecoli  |
| P36659 | CBPA_ECOLI | *    | P36659 | P21507 | cbpa_ecoli | srmb_ecoli |
| P36659 | CBPA_ECOLI | *    | P36659 | P45531 | cbpa_ecoli | tusc_ecoli |
| P36659 | CBPA_ECOLI | *    | P36659 | P0AG80 | cbpa_ecoli | ugpb_ecoli |
| P36659 | CBPA_ECOLI | *    | P36659 | P77625 | cbpa_ecoli | yfbt_ecoli |
| P36659 | CBPA_ECOLI | *    | P36659 | P30871 | cbpa_ecoli | ygif_ecoli |
| P36659 | CBPA_ECOLI | *    | P36659 | P39279 | cbpa_ecoli | yjej_ecoli |
| P36659 | CBPA_ECOLI | *    | P36659 | P39293 | cbpa_ecoli | yjfk_ecoli |
| P0ABF6 | CDD_ECOLI  | none |        |        |            |            |
| P06282 | CDH_ECOLI  | *    | P06282 | P13024 | cdh_ecoli  | fdhe_ecoli |
| P06282 | CDH_ECOLI  | *    | P06282 | P00393 | cdh_ecoli  | dhna_ecoli |
| P04419 | CEA2_ECOLX | none |        |        |            |            |
| P00646 | CEA3_ECOLX | none |        |        |            |            |
| P17999 | CEA6_ECOLX | none |        |        |            |            |
| P09883 | CEA9_ECOLX | none |        |        |            |            |
| P05819 | CEAB_ECOLX | none |        |        |            |            |
| P17998 | CEAD_ECOLX | *    | P17998 | P11899 | cead_ecolx | immd_ecoli |
| P0A9H7 | CFA_ECOLI  | *    | P0A9H7 | P37024 | cfa_ecoli  | hrpb_ecoli |
| P25733 | CFAC_ECOLX | none |        |        |            |            |
| P0A6F9 | CH10_ECOLI | *    | P0A6F9 | P0A6Y8 | ch10_ecoli | dnak_ecoli |
| P0A6F9 | CH10_ECOLI | *    | P0A6F9 | P0A6Y8 | ch10_ecoli | dnak_ecoli |
| P0A6F9 | CH10_ECOLI | *    | P0A6F9 | P0A6M8 | ch10_ecoli | efg_ecoli  |
| P0A6F9 | CH10_ECOLI | *    | P0A6F9 | P0AEL6 | ch10_ecoli | fepb_ecoli |
| P0A6F9 | CH10_ECOLI | *    | P0A6F9 | P0A6V5 | ch10_ecoli | glpe_ecoli |
| P0A6F9 | CH10_ECOLI | *    | P0A6F9 | P67910 | ch10_ecoli | hldd_ecoli |
| P0A6F9 | CH10_ECOLI | *    | P0A6F9 | P67910 | ch10_ecoli | hldd_ecoli |
| P0A6F9 | CH10_ECOLI | *    | P0A6F9 | P0A6Z3 | ch10_ecoli | htpg_ecoli |
| P0A6F9 | CH10_ECOLI | *    | P0A6F9 | P0AEX9 | ch10_ecoli | male_ecoli |
| P0A6F9 | CH10_ECOLI | *    | P0A6F9 | P0AEX9 | ch10_ecoli | male_ecoli |
| P0A6F9 | CH10_ECOLI | *    | P0A6F9 | P0AEZ3 | ch10_ecoli | mind_ecoli |
| P0A6F9 | CH10_ECOLI | *    | P0A6F9 | P0A9X4 | ch10_ecoli | mreb_ecoli |
| P0A6F9 | CH10_ECOLI | *    | P0A6F9 | P18843 | ch10_ecoli | nade_ecoli |
| P0A6F9 | CH10_ECOLI | *    | P0A6F9 | P0A772 | ch10_ecoli | nrdd_ecoli |
| P0A6F9 | CH10_ECOLI | *    | P0A6F9 | P0A9K9 | ch10_ecoli | slyd_ecoli |
| P0A6F9 | CH10_ECOLI | *    | P0A6F9 | P76194 | ch10_ecoli | sufe_ecoli |
| P0A6F9 | CH10_ECOLI | *    | P0A6F9 | P0A850 | ch10_ecoli | tig_ecoli  |

|        |            |   |        |        |            |             |
|--------|------------|---|--------|--------|------------|-------------|
| POA6F9 | CH10_ECOLI | * | POA6F9 | POA850 | ch10_ecoli | tig_ecoli   |
| POA6F9 | CH10_ECOLI | * | POA6F9 | P77504 | ch10_ecoli | ybbp_ecoli  |
| POA6F5 | CH60_ECOLI | * | POA6F5 | P63284 | ch60_ecoli | clpb_ecoli  |
| POA6F5 | CH60_ECOLI | * | POA6F5 | POA6Y8 | ch60_ecoli | dnak_ecoli  |
| POA6F5 | CH60_ECOLI | * | POA6F5 | POC8J6 | ch60_ecoli | gaty_ecoli  |
| POA6F5 | CH60_ECOLI | * | POA6F5 | POA6V5 | ch60_ecoli | glpe_ecoli  |
| POA6F5 | CH60_ECOLI | * | POA6F5 | P09372 | ch60_ecoli | grpe_ecoli  |
| POA6F5 | CH60_ECOLI | * | POA6F5 | POA9M0 | ch60_ecoli | lon_ecoli   |
| POA6F5 | CH60_ECOLI | * | POA6F5 | POAEX9 | ch60_ecoli | male_ecoli  |
| POA6F5 | CH60_ECOLI | * | POA6F5 | POAEX9 | ch60_ecoli | male_ecoli  |
| POA6F5 | CH60_ECOLI | * | POA6F5 | POAEX9 | ch60_ecoli | male_ecoli  |
| POA6F5 | CH60_ECOLI | * | POA6F5 | P61889 | ch60_ecoli | mdh_ecoli   |
| POA6F5 | CH60_ECOLI | * | POA6F5 | P09152 | ch60_ecoli | narg_ecoli  |
| POA6F5 | CH60_ECOLI | * | POA6F5 | P33602 | ch60_ecoli | nuog_ecoli  |
| POA6F5 | CH60_ECOLI | * | POA6F5 | POA7E1 | ch60_ecoli | pyrd_ecoli  |
| POA6F5 | CH60_ECOLI | * | POA6F5 | P16916 | ch60_ecoli | rhsa_ecoli  |
| POA6F5 | CH60_ECOLI | * | POA6F5 | POA8T7 | ch60_ecoli | rpoc_ecoli  |
| POA6F5 | CH60_ECOLI | * | POA6F5 | POAFR0 | ch60_ecoli | rssa_ecoli  |
| POA6F5 | CH60_ECOLI | * | POA6F5 | POA850 | ch60_ecoli | tig_ecoli   |
| POA6F5 | CH60_ECOLI | * | POA6F5 | P39177 | ch60_ecoli | uspg_ecoli  |
| POA6F5 | CH60_ECOLI | * | POA6F5 | P77395 | ch60_ecoli | ybbn_ecoli  |
| POA6F5 | CH60_ECOLI | * | POA6F5 | P76010 | ch60_ecoli | ycgr_ecoli  |
| POA6F5 | CH60_ECOLI | * | POA6F5 | P28638 | ch60_ecoli | yhdj_ecoli  |
| POA6F5 | CH60_ECOLI | * | POA6F5 | POADK6 | ch60_ecoli | yiba_ecoli  |
| POA6F5 | CH60_ECOLI | * | POA6F5 | P39288 | ch60_ecoli | yjes_ecoli  |
| P17411 | CHBF_ECOLI |   | none   |        |            |             |
| POABH7 | CISY_ECOLI | * | POABH7 | POA6F5 | cisy_ecoli | ch60_ecoli  |
| POABH7 | CISY_ECOLI | * | POABH7 | POAD61 | cisy_ecoli | kpyk1_ecoli |
| POABH7 | CISY_ECOLI | * | POABH7 | P77188 | cisy_ecoli | matc_ecoli  |
| POABH7 | CISY_ECOLI | * | POABH7 | P18843 | cisy_ecoli | nade_ecoli  |
| P77390 | CITC_ECOLI | * | P77390 | POA6F5 | citc_ecoli | ch60_ecoli  |
| P77390 | CITC_ECOLI | * | P77390 | POA6G5 | citc_ecoli | citx_ecoli  |
| P77390 | CITC_ECOLI | * | P77390 | P27296 | citc_ecoli | ding_ecoli  |
| P77390 | CITC_ECOLI | * | P77390 | POA9M0 | citc_ecoli | lon_ecoli   |
| P77390 | CITC_ECOLI | * | P77390 | P16918 | citc_ecoli | rhsc_ecoli  |
| POABH9 | CLPA_ECOLI | * | POABH9 | POAEC5 | clpa_ecoli | bara_ecoli  |
| POABH9 | CLPA_ECOLI | * | POABH9 | POAE67 | clpa_ecoli | chey_ecoli  |
| POABH9 | CLPA_ECOLI | * | POABH9 | POA8Q6 | clpa_ecoli | clps_ecoli  |
| POABH9 | CLPA_ECOLI | * | POABH9 | POA8Q6 | clpa_ecoli | clps_ecoli  |
| POABH9 | CLPA_ECOLI | * | POABH9 | POA8Q6 | clpa_ecoli | clps_ecoli  |

|        |            |   |        |        |            |             |
|--------|------------|---|--------|--------|------------|-------------|
| POABH9 | CLPA_ECOLI | * | POABH9 | P0A8Q6 | clpa_ecoli | clps_ecoli  |
| POABH9 | CLPA_ECOLI | * | POABH9 | P0A8Q6 | clpa_ecoli | clps_ecoli  |
| POABH9 | CLPA_ECOLI | * | POABH9 | P0A6Y8 | clpa_ecoli | dnak_ecoli  |
| POABH9 | CLPA_ECOLI | * | POABH9 | P0CE47 | clpa_ecoli | eftu1_ecoli |
| POABH9 | CLPA_ECOLI | * | POABH9 | P0AAJ3 | clpa_ecoli | fdnh_ecoli  |
| POABH9 | CLPA_ECOLI | * | POABH9 | P06971 | clpa_ecoli | fhua_ecoli  |
| POABH9 | CLPA_ECOLI | * | POABH9 | P0A9H3 | clpa_ecoli | ldci_ecoli  |
| POABH9 | CLPA_ECOLI | * | POABH9 | P22523 | clpa_ecoli | mukb_ecoli  |
| POABH9 | CLPA_ECOLI | * | POABH9 | P18843 | clpa_ecoli | nade_ecoli  |
| POABH9 | CLPA_ECOLI | * | POABH9 | P0A7B1 | clpa_ecoli | ppk_ecoli   |
| POABH9 | CLPA_ECOLI | * | POABH9 | P14175 | clpa_ecoli | prov_ecoli  |
| POABH9 | CLPA_ECOLI | * | POABH9 | P15254 | clpa_ecoli | pur4_ecoli  |
| POABH9 | CLPA_ECOLI | * | POABH9 | P0AG30 | clpa_ecoli | rho_ecoli   |
| POABH9 | CLPA_ECOLI | * | POABH9 | P0AG30 | clpa_ecoli | rho_ecoli   |
| POABH9 | CLPA_ECOLI | * | POABH9 | P16918 | clpa_ecoli | rhsc_ecoli  |
| POABH9 | CLPA_ECOLI | * | POABH9 | P0A7J3 | clpa_ecoli | rl10_ecoli  |
| POABH9 | CLPA_ECOLI | * | POABH9 | P0AA10 | clpa_ecoli | rl13_ecoli  |
| POABH9 | CLPA_ECOLI | * | POABH9 | P0AG44 | clpa_ecoli | rl17_ecoli  |
| POABH9 | CLPA_ECOLI | * | POABH9 | P0C018 | clpa_ecoli | rl18_ecoli  |
| POABH9 | CLPA_ECOLI | * | POABH9 | P60422 | clpa_ecoli | rl2_ecoli   |
| POABH9 | CLPA_ECOLI | * | POABH9 | P0AG48 | clpa_ecoli | rl21_ecoli  |
| POABH9 | CLPA_ECOLI | * | POABH9 | P0A7L8 | clpa_ecoli | rl27_ecoli  |
| POABH9 | CLPA_ECOLI | * | POABH9 | P0A7M6 | clpa_ecoli | rl29_ecoli  |
| POABH9 | CLPA_ECOLI | * | POABH9 | P60438 | clpa_ecoli | rl3_ecoli   |
| POABH9 | CLPA_ECOLI | * | POABH9 | P0A7N9 | clpa_ecoli | rl33_ecoli  |
| POABH9 | CLPA_ECOLI | * | POABH9 | P60723 | clpa_ecoli | rl4_ecoli   |
| POABH9 | CLPA_ECOLI | * | POABH9 | P62399 | clpa_ecoli | rl5_ecoli   |
| POABH9 | CLPA_ECOLI | * | POABH9 | P0A7K2 | clpa_ecoli | rl7_ecoli   |
| POABH9 | CLPA_ECOLI | * | POABH9 | P0A7R1 | clpa_ecoli | rl9_ecoli   |
| POABH9 | CLPA_ECOLI | * | POABH9 | P0A8V2 | clpa_ecoli | rpob_ecoli  |
| POABH9 | CLPA_ECOLI | * | POABH9 | P0A8T7 | clpa_ecoli | rpoc_ecoli  |
| POABH9 | CLPA_ECOLI | * | POABH9 | P0AG67 | clpa_ecoli | rs1_ecoli   |
| POABH9 | CLPA_ECOLI | * | POABH9 | P0AG67 | clpa_ecoli | rs1_ecoli   |
| POABH9 | CLPA_ECOLI | * | POABH9 | P0A7R5 | clpa_ecoli | rs10_ecoli  |
| POABH9 | CLPA_ECOLI | * | POABH9 | P0AG59 | clpa_ecoli | rs14_ecoli  |
| POABH9 | CLPA_ECOLI | * | POABH9 | P0A7T3 | clpa_ecoli | rs16_ecoli  |
| POABH9 | CLPA_ECOLI | * | POABH9 | P0A7V0 | clpa_ecoli | rs2_ecoli   |
| POABH9 | CLPA_ECOLI | * | POABH9 | P0A7V0 | clpa_ecoli | rs2_ecoli   |
| POABH9 | CLPA_ECOLI | * | POABH9 | P68679 | clpa_ecoli | rs21_ecoli  |
| POABH9 | CLPA_ECOLI | * | POABH9 | P0A7V8 | clpa_ecoli | rs4_ecoli   |
| POABH9 | CLPA_ECOLI | * | POABH9 | P02358 | clpa_ecoli | rs6_ecoli   |
| POABH9 | CLPA_ECOLI | * | POABH9 | P02359 | clpa_ecoli | rs7_ecoli   |
| POABH9 | CLPA_ECOLI | * | POABH9 | P02359 | clpa_ecoli | rs7_ecoli   |
| POABH9 | CLPA_ECOLI | * | POABH9 | P13458 | clpa_ecoli | sbcc_ecoli  |
| POABH9 | CLPA_ECOLI | * | POABH9 | P10408 | clpa_ecoli | seca_ecoli  |



|        |            |   |        |        |                            |                             |
|--------|------------|---|--------|--------|----------------------------|-----------------------------|
| P0ABH9 | CLPA_ECOLI | * | P0ABH9 | P0AG24 | <a href="#">clpa_ecoli</a> | <a href="#">spot_ecoli</a>  |
| P0ABH9 | CLPA_ECOLI | * | P0ABH9 | P0AAQ6 | <a href="#">clpa_ecoli</a> | <a href="#">ybaa_ecoli</a>  |
| P0ABH9 | CLPA_ECOLI | * | P0ABH9 | P75826 | <a href="#">clpa_ecoli</a> | <a href="#">ybje_ecoli</a>  |
| P0ABH9 | CLPA_ECOLI | * | P0ABH9 | P08245 | <a href="#">clpa_ecoli</a> | <a href="#">ycih_ecoli</a>  |
| P0ABH9 | CLPA_ECOLI | * | P0ABH9 | P30871 | <a href="#">clpa_ecoli</a> | <a href="#">ygif_ecoli</a>  |
| P0ABH9 | CLPA_ECOLI | * | P0ABH9 | P0AGK4 | <a href="#">clpa_ecoli</a> | <a href="#">yhby_ecoli</a>  |
|        |            |   |        |        |                            |                             |
| P63284 | CLPB_ECOLI | * | P63284 | P00722 | <a href="#">clpb_ecoli</a> | <a href="#">bgal_ecoli</a>  |
| P63284 | CLPB_ECOLI | * | P63284 | P0ABL8 | <a href="#">clpb_ecoli</a> | <a href="#">ccmb_ecoli</a>  |
| P63284 | CLPB_ECOLI | * | P63284 | P0AC41 | <a href="#">clpb_ecoli</a> | <a href="#">dhsa_ecoli</a>  |
| P63284 | CLPB_ECOLI | * | P63284 | P0A6Y8 | <a href="#">clpb_ecoli</a> | <a href="#">dnak_ecoli</a>  |
| P63284 | CLPB_ECOLI | * | P63284 | P0CE47 | <a href="#">clpb_ecoli</a> | <a href="#">eftu1_ecoli</a> |
| P63284 | CLPB_ECOLI | * | P63284 | P30855 | <a href="#">clpb_ecoli</a> | <a href="#">evgs_ecoli</a>  |
| P63284 | CLPB_ECOLI | * | P63284 | P75884 | <a href="#">clpb_ecoli</a> | <a href="#">gfcg_ecoli</a>  |
| P63284 | CLPB_ECOLI | * | P63284 | P0A705 | <a href="#">clpb_ecoli</a> | <a href="#">if2_ecoli</a>   |
| P63284 | CLPB_ECOLI | * | P63284 | P37005 | <a href="#">clpb_ecoli</a> | <a href="#">last_ecoli</a>  |
| P63284 | CLPB_ECOLI | * | P63284 | P37330 | <a href="#">clpb_ecoli</a> | <a href="#">masz_ecoli</a>  |
| P63284 | CLPB_ECOLI | * | P63284 | P18843 | <a href="#">clpb_ecoli</a> | <a href="#">nade_ecoli</a>  |
| P63284 | CLPB_ECOLI | * | P63284 | P0AFJ5 | <a href="#">clpb_ecoli</a> | <a href="#">phob_ecoli</a>  |
| P63284 | CLPB_ECOLI | * | P63284 | P37177 | <a href="#">clpb_ecoli</a> | <a href="#">pt1p_ecoli</a>  |
| P63284 | CLPB_ECOLI | * | P63284 | P69829 | <a href="#">clpb_ecoli</a> | <a href="#">ptsn_ecoli</a>  |
| P63284 | CLPB_ECOLI | * | P63284 | P09546 | <a href="#">clpb_ecoli</a> | <a href="#">puta_ecoli</a>  |
| P63284 | CLPB_ECOLI | * | P63284 | P0AA10 | <a href="#">clpb_ecoli</a> | <a href="#">rl13_ecoli</a>  |
| P63284 | CLPB_ECOLI | * | P63284 | P60422 | <a href="#">clpb_ecoli</a> | <a href="#">rl2_ecoli</a>   |
| P63284 | CLPB_ECOLI | * | P63284 | P0AG48 | <a href="#">clpb_ecoli</a> | <a href="#">rl21_ecoli</a>  |
| P63284 | CLPB_ECOLI | * | P63284 | P61175 | <a href="#">clpb_ecoli</a> | <a href="#">rl22_ecoli</a>  |
| P63284 | CLPB_ECOLI | * | P63284 | P0A7M6 | <a href="#">clpb_ecoli</a> | <a href="#">rl29_ecoli</a>  |
| P63284 | CLPB_ECOLI | * | P63284 | P60438 | <a href="#">clpb_ecoli</a> | <a href="#">rl3_ecoli</a>   |
| P63284 | CLPB_ECOLI | * | P63284 | P0A8V0 | <a href="#">clpb_ecoli</a> | <a href="#">rnz_ecoli</a>   |
| P63284 | CLPB_ECOLI | * | P63284 | P0AG67 | <a href="#">clpb_ecoli</a> | <a href="#">rs1_ecoli</a>   |
| P63284 | CLPB_ECOLI | * | P63284 | P0A7R5 | <a href="#">clpb_ecoli</a> | <a href="#">rs10_ecoli</a>  |
| P63284 | CLPB_ECOLI | * | P63284 | P0AG59 | <a href="#">clpb_ecoli</a> | <a href="#">rs14_ecoli</a>  |
| P63284 | CLPB_ECOLI | * | P63284 | P0A7V0 | <a href="#">clpb_ecoli</a> | <a href="#">rs2_ecoli</a>   |
| P63284 | CLPB_ECOLI | * | P63284 | P02359 | <a href="#">clpb_ecoli</a> | <a href="#">rs7_ecoli</a>   |
| P63284 | CLPB_ECOLI | * | P63284 | P0A7W7 | <a href="#">clpb_ecoli</a> | <a href="#">rs8_ecoli</a>   |
| P63284 | CLPB_ECOLI | * | P63284 | P0AGH5 | <a href="#">clpb_ecoli</a> | <a href="#">sapc_ecoli</a>  |
| P63284 | CLPB_ECOLI | * | P63284 | P00957 | <a href="#">clpb_ecoli</a> | <a href="#">sya_ecoli</a>   |
| P63284 | CLPB_ECOLI | * | P63284 | P30139 | <a href="#">clpb_ecoli</a> | <a href="#">thig_ecoli</a>  |
| P63284 | CLPB_ECOLI | * | P63284 | Q47706 | <a href="#">clpb_ecoli</a> | <a href="#">uidc_ecoli</a>  |
| P63284 | CLPB_ECOLI | * | P63284 | P39306 | <a href="#">clpb_ecoli</a> | <a href="#">ulaf_ecoli</a>  |
| P63284 | CLPB_ECOLI | * | P63284 | P77694 | <a href="#">clpb_ecoli</a> | <a href="#">yagw_ecoli</a>  |
| P63284 | CLPB_ECOLI | * | P63284 | P77561 | <a href="#">clpb_ecoli</a> | <a href="#">ydep_ecoli</a>  |
| P63284 | CLPB_ECOLI | * | P63284 | P0ADE6 | <a href="#">clpb_ecoli</a> | <a href="#">ygau_ecoli</a>  |
| P63284 | CLPB_ECOLI | * | P63284 | P45546 | <a href="#">clpb_ecoli</a> | <a href="#">yhft_ecoli</a>  |
| P63284 | CLPB_ECOLI | * | P63284 | P32689 | <a href="#">clpb_ecoli</a> | <a href="#">yjbh_ecoli</a>  |



|        |            |          |        |            |            |  |
|--------|------------|----------|--------|------------|------------|--|
| Q05433 | CLPE_ECOLX | none     |        |            |            |  |
| P76290 | CMOA_ECOLI | * P76290 | P0ABL5 | cmoa_ecoli | napc_ecoli |  |
| P76290 | CMOA_ECOLI | * P76290 | P0A814 | cmoa_ecoli | ruvc_ecoli |  |
| P76290 | CMOA_ECOLI | * P76290 | P75856 | cmoa_ecoli | ycbr_ecoli |  |
| P08331 | CPDB_ECOLI | none     |        |            |            |  |
| P0ACJ8 | CRP_ECOLI  | * P0ACJ8 | P60438 | crp_ecoli  | rl3_ecoli  |  |
| P0ACJ8 | CRP_ECOLI  | * P0ACJ8 | P0A7K2 | crp_ecoli  | rl7_ecoli  |  |
| P0ACJ8 | CRP_ECOLI  | * P0ACJ8 | P0A7R5 | crp_ecoli  | rs10_ecoli |  |
| P0ACJ8 | CRP_ECOLI  | * P0ACJ8 | P0A7W1 | crp_ecoli  | rs5_ecoli  |  |
| P62604 | CSCR_ECOLX | none     |        |            |            |  |
| P0A9Y6 | CSPC_ECOLI | * P0A9Y6 | P0ABD5 | cspc_ecoli | acca_ecoli |  |
| P0A9Y6 | CSPC_ECOLI | * P0A9Y6 | P0ABD5 | cspc_ecoli | acca_ecoli |  |
| P0A9Y6 | CSPC_ECOLI | * P0A9Y6 | P0A9Q5 | cspc_ecoli | accd_ecoli |  |
| P0A9Y6 | CSPC_ECOLI | * P0A9Y6 | P33224 | cspc_ecoli | aidb_ecoli |  |
| P0A9Y6 | CSPC_ECOLI | * P0A9Y6 | P33224 | cspc_ecoli | aidb_ecoli |  |
| P0A9Y6 | CSPC_ECOLI | * P0A9Y6 | P0AE88 | cspc_ecoli | cpxr_ecoli |  |
| P0A9Y6 | CSPC_ECOLI | * P0A9Y6 | P08401 | cspc_ecoli | crec_ecoli |  |
| P0A9Y6 | CSPC_ECOLI | * P0A9Y6 | P0A968 | cspc_ecoli | cspd_ecoli |  |
| P0A9Y6 | CSPC_ECOLI | * P0A9Y6 | P0A972 | cspc_ecoli | cspe_ecoli |  |
| P0A9Y6 | CSPC_ECOLI | * P0A9Y6 | P0ACF0 | cspc_ecoli | dbha_ecoli |  |
| P0A9Y6 | CSPC_ECOLI | * P0A9Y6 | P0ACF0 | cspc_ecoli | dbha_ecoli |  |
| P0A9Y6 | CSPC_ECOLI | * P0A9Y6 | P0ACF4 | cspc_ecoli | dbhb_ecoli |  |
| P0A9Y6 | CSPC_ECOLI | * P0A9Y6 | P0A9P6 | cspc_ecoli | dead_ecoli |  |
| P0A9Y6 | CSPC_ECOLI | * P0A9Y6 | P0A9P6 | cspc_ecoli | dead_ecoli |  |
| P0A9Y6 | CSPC_ECOLI | * P0A9Y6 | P08622 | cspc_ecoli | dnaj_ecoli |  |
| P0A9Y6 | CSPC_ECOLI | * P0A9Y6 | P36837 | cspc_ecoli | dtpb_ecoli |  |
| P0A9Y6 | CSPC_ECOLI | * P0A9Y6 | P0ADI4 | cspc_ecoli | entb_ecoli |  |
| P0A9Y6 | CSPC_ECOLI | * P0A9Y6 | P30845 | cspc_ecoli | epta_ecoli |  |
| P0A9Y6 | CSPC_ECOLI | * P0A9Y6 | P0A6F3 | cspc_ecoli | glpk_ecoli |  |
| P0A9Y6 | CSPC_ECOLI | * P0A9Y6 | P77334 | cspc_ecoli | gmr_ecoli  |  |
| P0A9Y6 | CSPC_ECOLI | * P0A9Y6 | P0A6X3 | cspc_ecoli | hfq_ecoli  |  |
| P0A9Y6 | CSPC_ECOLI | * P0A9Y6 | P0ACF8 | cspc_ecoli | hns_ecoli  |  |
| P0A9Y6 | CSPC_ECOLI | * P0A9Y6 | P43329 | cspc_ecoli | hrpa_ecoli |  |
| P0A9Y6 | CSPC_ECOLI | * P0A9Y6 | P0A9F9 | cspc_ecoli | metr_ecoli |  |
| P0A9Y6 | CSPC_ECOLI | * P0A9Y6 | P18843 | cspc_ecoli | nade_ecoli |  |
| P0A9Y6 | CSPC_ECOLI | * P0A9Y6 | P05055 | cspc_ecoli | pnp_ecoli  |  |
| P0A9Y6 | CSPC_ECOLI | * P0A9Y6 | P77243 | cspc_ecoli | prpd_ecoli |  |
| P0A9Y6 | CSPC_ECOLI | * P0A9Y6 | P09546 | cspc_ecoli | puta_ecoli |  |
| P0A9Y6 | CSPC_ECOLI | * P0A9Y6 | P69407 | cspc_ecoli | rcsb_ecoli |  |

|        |            |   |        |        |            |            |
|--------|------------|---|--------|--------|------------|------------|
| POA9Y6 | CSPC_ECOLI | * | POA9Y6 | P05824 | cspc_ecoli | recn_ecoli |
| POA9Y6 | CSPC_ECOLI | * | POA9Y6 | P27129 | cspc_ecoli | rfaj_ecoli |
| POA9Y6 | CSPC_ECOLI | * | POA9Y6 | P25888 | cspc_ecoli | rhle_ecoli |
| POA9Y6 | CSPC_ECOLI | * | POA9Y6 | P0AG30 | cspc_ecoli | rho_ecoli  |
| POA9Y6 | CSPC_ECOLI | * | POA9Y6 | P0AG30 | cspc_ecoli | rho_ecoli  |
| POA9Y6 | CSPC_ECOLI | * | POA9Y6 | P0A7L0 | cspc_ecoli | rl1_ecoli  |
| POA9Y6 | CSPC_ECOLI | * | POA9Y6 | P0A7L0 | cspc_ecoli | rl1_ecoli  |
| POA9Y6 | CSPC_ECOLI | * | POA9Y6 | P0A7L0 | cspc_ecoli | rl1_ecoli  |
| POA9Y6 | CSPC_ECOLI | * | POA9Y6 | P0AA10 | cspc_ecoli | rl13_ecoli |
| POA9Y6 | CSPC_ECOLI | * | POA9Y6 | P0AA10 | cspc_ecoli | rl13_ecoli |
| POA9Y6 | CSPC_ECOLI | * | POA9Y6 | P0C018 | cspc_ecoli | rl18_ecoli |
| POA9Y6 | CSPC_ECOLI | * | POA9Y6 | P0A7K6 | cspc_ecoli | rl19_ecoli |
| POA9Y6 | CSPC_ECOLI | * | POA9Y6 | P60422 | cspc_ecoli | rl2_ecoli  |
| POA9Y6 | CSPC_ECOLI | * | POA9Y6 | P60422 | cspc_ecoli | rl2_ecoli  |
| POA9Y6 | CSPC_ECOLI | * | POA9Y6 | P60422 | cspc_ecoli | rl2_ecoli  |
| POA9Y6 | CSPC_ECOLI | * | POA9Y6 | P0AG48 | cspc_ecoli | rl21_ecoli |
| POA9Y6 | CSPC_ECOLI | * | POA9Y6 | P61175 | cspc_ecoli | rl22_ecoli |
| POA9Y6 | CSPC_ECOLI | * | POA9Y6 | P0ADZ0 | cspc_ecoli | rl23_ecoli |
| POA9Y6 | CSPC_ECOLI | * | POA9Y6 | P60624 | cspc_ecoli | rl24_ecoli |
| POA9Y6 | CSPC_ECOLI | * | POA9Y6 | P60438 | cspc_ecoli | rl3_ecoli  |
| POA9Y6 | CSPC_ECOLI | * | POA9Y6 | P60438 | cspc_ecoli | rl3_ecoli  |
| POA9Y6 | CSPC_ECOLI | * | POA9Y6 | P60723 | cspc_ecoli | rl4_ecoli  |
| POA9Y6 | CSPC_ECOLI | * | POA9Y6 | P60723 | cspc_ecoli | rl4_ecoli  |
| POA9Y6 | CSPC_ECOLI | * | POA9Y6 | P62399 | cspc_ecoli | rl5_ecoli  |
| POA9Y6 | CSPC_ECOLI | * | POA9Y6 | P62399 | cspc_ecoli | rl5_ecoli  |
| POA9Y6 | CSPC_ECOLI | * | POA9Y6 | P0A7R1 | cspc_ecoli | rl9_ecoli  |
| POA9Y6 | CSPC_ECOLI | * | POA9Y6 | P75864 | cspc_ecoli | rlml_ecoli |
| POA9Y6 | CSPC_ECOLI | * | POA9Y6 | P37765 | cspc_ecoli | rlub_ecoli |
| POA9Y6 | CSPC_ECOLI | * | POA9Y6 | P0AA39 | cspc_ecoli | rluc_ecoli |
| POA9Y6 | CSPC_ECOLI | * | POA9Y6 | P75966 | cspc_ecoli | rlue_ecoli |
| POA9Y6 | CSPC_ECOLI | * | POA9Y6 | P21499 | cspc_ecoli | rnr_ecoli  |
| POA9Y6 | CSPC_ECOLI | * | POA9Y6 | P0AG67 | cspc_ecoli | rs1_ecoli  |
| POA9Y6 | CSPC_ECOLI | * | POA9Y6 | P0AG67 | cspc_ecoli | rs1_ecoli  |
| POA9Y6 | CSPC_ECOLI | * | POA9Y6 | P0A7R5 | cspc_ecoli | rs10_ecoli |
| POA9Y6 | CSPC_ECOLI | * | POA9Y6 | P0A7S9 | cspc_ecoli | rs13_ecoli |
| POA9Y6 | CSPC_ECOLI | * | POA9Y6 | P0A7S9 | cspc_ecoli | rs13_ecoli |
| POA9Y6 | CSPC_ECOLI | * | POA9Y6 | P0AG59 | cspc_ecoli | rs14_ecoli |
| POA9Y6 | CSPC_ECOLI | * | POA9Y6 | P0A7V0 | cspc_ecoli | rs2_ecoli  |
| POA9Y6 | CSPC_ECOLI | * | POA9Y6 | P0A7V0 | cspc_ecoli | rs2_ecoli  |
| POA9Y6 | CSPC_ECOLI | * | POA9Y6 | P0A7U7 | cspc_ecoli | rs20_ecoli |
| POA9Y6 | CSPC_ECOLI | * | POA9Y6 | P0A7V3 | cspc_ecoli | rs3_ecoli  |
| POA9Y6 | CSPC_ECOLI | * | POA9Y6 | P0A7V3 | cspc_ecoli | rs3_ecoli  |
| POA9Y6 | CSPC_ECOLI | * | POA9Y6 | P0A7V8 | cspc_ecoli | rs4_ecoli  |
| POA9Y6 | CSPC_ECOLI | * | POA9Y6 | P0A7V8 | cspc_ecoli | rs4_ecoli  |
| POA9Y6 | CSPC_ECOLI | * | POA9Y6 | P0A7V8 | cspc_ecoli | rs4_ecoli  |

|        |            |   |        |        |                            |                            |
|--------|------------|---|--------|--------|----------------------------|----------------------------|
| POA9Y6 | CSPC_ECOLI | * | POA9Y6 | P0A7W1 | <a href="#">cspc_ecoli</a> | <a href="#">rs5_ecoli</a>  |
| POA9Y6 | CSPC_ECOLI | * | POA9Y6 | P0A7W1 | <a href="#">cspc_ecoli</a> | <a href="#">rs5_ecoli</a>  |
| POA9Y6 | CSPC_ECOLI | * | POA9Y6 | P02358 | <a href="#">cspc_ecoli</a> | <a href="#">rs6_ecoli</a>  |
| POA9Y6 | CSPC_ECOLI | * | POA9Y6 | P02359 | <a href="#">cspc_ecoli</a> | <a href="#">rs7_ecoli</a>  |
| POA9Y6 | CSPC_ECOLI | * | POA9Y6 | P02359 | <a href="#">cspc_ecoli</a> | <a href="#">rs7_ecoli</a>  |
| POA9Y6 | CSPC_ECOLI | * | POA9Y6 | P02359 | <a href="#">cspc_ecoli</a> | <a href="#">rs7_ecoli</a>  |
| POA9Y6 | CSPC_ECOLI | * | POA9Y6 | P0A7X3 | <a href="#">cspc_ecoli</a> | <a href="#">rs9_ecoli</a>  |
| POA9Y6 | CSPC_ECOLI | * | POA9Y6 | P36929 | <a href="#">cspc_ecoli</a> | <a href="#">rsmb_ecoli</a> |
| POA9Y6 | CSPC_ECOLI | * | POA9Y6 | P06612 | <a href="#">cspc_ecoli</a> | <a href="#">top1_ecoli</a> |
| POA9Y6 | CSPC_ECOLI | * | POA9Y6 | P39177 | <a href="#">cspc_ecoli</a> | <a href="#">uspg_ecoli</a> |
| POA9Y6 | CSPC_ECOLI | * | POA9Y6 | P75989 | <a href="#">cspc_ecoli</a> | <a href="#">ycge_ecoli</a> |
| POA9Y6 | CSPC_ECOLI | * | POA9Y6 | P76069 | <a href="#">cspc_ecoli</a> | <a href="#">yday_ecoli</a> |
| POA9Y6 | CSPC_ECOLI | * | POA9Y6 | P76347 | <a href="#">cspc_ecoli</a> | <a href="#">yeej_ecoli</a> |
| POA9Y6 | CSPC_ECOLI | * | POA9Y6 | P0AGJ5 | <a href="#">cspc_ecoli</a> | <a href="#">yfif_ecoli</a> |
| POA9Y6 | CSPC_ECOLI | * | POA9Y6 | P0AGK4 | <a href="#">cspc_ecoli</a> | <a href="#">yhby_ecoli</a> |
| POA9Y6 | CSPC_ECOLI | * | POA9Y6 | P37634 | <a href="#">cspc_ecoli</a> | <a href="#">yhir_ecoli</a> |
| POA9Y6 | CSPC_ECOLI | * | POA9Y6 | P37634 | <a href="#">cspc_ecoli</a> | <a href="#">yhir_ecoli</a> |

|        |            |   |        |        |                            |                            |
|--------|------------|---|--------|--------|----------------------------|----------------------------|
| POA968 | CSPD_ECOLI | * | POA968 | P0ABD5 | <a href="#">cspd_ecoli</a> | <a href="#">acca_ecoli</a> |
| POA968 | CSPD_ECOLI | * | POA968 | P24177 | <a href="#">cspd_ecoli</a> | <a href="#">acrd_ecoli</a> |
| POA968 | CSPD_ECOLI | * | POA968 | P0AC38 | <a href="#">cspd_ecoli</a> | <a href="#">aspa_ecoli</a> |
| POA968 | CSPD_ECOLI | * | POA968 | P0A9Y6 | <a href="#">cspd_ecoli</a> | <a href="#">cspc_ecoli</a> |
| POA968 | CSPD_ECOLI | * | POA968 | P0A9Y6 | <a href="#">cspd_ecoli</a> | <a href="#">cspc_ecoli</a> |
| POA968 | CSPD_ECOLI | * | POA968 | P0A972 | <a href="#">cspd_ecoli</a> | <a href="#">cspe_ecoli</a> |
| POA968 | CSPD_ECOLI | * | POA968 | P0ACF0 | <a href="#">cspd_ecoli</a> | <a href="#">dbha_ecoli</a> |
| POA968 | CSPD_ECOLI | * | POA968 | P0A6J8 | <a href="#">cspd_ecoli</a> | <a href="#">ddla_ecoli</a> |
| POA968 | CSPD_ECOLI | * | POA968 | P77308 | <a href="#">cspd_ecoli</a> | <a href="#">ddpb_ecoli</a> |
| POA968 | CSPD_ECOLI | * | POA968 | P0A9P6 | <a href="#">cspd_ecoli</a> | <a href="#">dead_ecoli</a> |
| POA968 | CSPD_ECOLI | * | POA968 | P0AAG0 | <a href="#">cspd_ecoli</a> | <a href="#">dppd_ecoli</a> |
| POA968 | CSPD_ECOLI | * | POA968 | P0AFG8 | <a href="#">cspd_ecoli</a> | <a href="#">odp1_ecoli</a> |
| POA968 | CSPD_ECOLI | * | POA968 | P05055 | <a href="#">cspd_ecoli</a> | <a href="#">pnp_ecoli</a>  |
| POA968 | CSPD_ECOLI | * | POA968 | P0AG30 | <a href="#">cspd_ecoli</a> | <a href="#">rho_ecoli</a>  |
| POA968 | CSPD_ECOLI | * | POA968 | P0A7L0 | <a href="#">cspd_ecoli</a> | <a href="#">rl1_ecoli</a>  |
| POA968 | CSPD_ECOLI | * | POA968 | P0AA10 | <a href="#">cspd_ecoli</a> | <a href="#">rl13_ecoli</a> |
| POA968 | CSPD_ECOLI | * | POA968 | P0A7K6 | <a href="#">cspd_ecoli</a> | <a href="#">rl19_ecoli</a> |
| POA968 | CSPD_ECOLI | * | POA968 | P60422 | <a href="#">cspd_ecoli</a> | <a href="#">rl2_ecoli</a>  |
| POA968 | CSPD_ECOLI | * | POA968 | P60624 | <a href="#">cspd_ecoli</a> | <a href="#">rl24_ecoli</a> |
| POA968 | CSPD_ECOLI | * | POA968 | P60438 | <a href="#">cspd_ecoli</a> | <a href="#">rl3_ecoli</a>  |
| POA968 | CSPD_ECOLI | * | POA968 | P60438 | <a href="#">cspd_ecoli</a> | <a href="#">rl3_ecoli</a>  |
| POA968 | CSPD_ECOLI | * | POA968 | P75864 | <a href="#">cspd_ecoli</a> | <a href="#">rlml_ecoli</a> |
| POA968 | CSPD_ECOLI | * | POA968 | P37765 | <a href="#">cspd_ecoli</a> | <a href="#">rlub_ecoli</a> |
| POA968 | CSPD_ECOLI | * | POA968 | P0AA39 | <a href="#">cspd_ecoli</a> | <a href="#">rluc_ecoli</a> |
| POA968 | CSPD_ECOLI | * | POA968 | P21499 | <a href="#">cspd_ecoli</a> | <a href="#">rnr_ecoli</a>  |
| POA968 | CSPD_ECOLI | * | POA968 | P0AG67 | <a href="#">cspd_ecoli</a> | <a href="#">rs1_ecoli</a>  |
| POA968 | CSPD_ECOLI | * | POA968 | P0A7R5 | <a href="#">cspd_ecoli</a> | <a href="#">rs10_ecoli</a> |

|        |            |      |        |        |            |            |
|--------|------------|------|--------|--------|------------|------------|
| P0A968 | CSPD_ECOLI | *    | P0A968 | P0A7S9 | cspd_ecoli | rs13_ecoli |
| P0A968 | CSPD_ECOLI | *    | P0A968 | P0AG59 | cspd_ecoli | rs14_ecoli |
| P0A968 | CSPD_ECOLI | *    | P0A968 | P0A7V0 | cspd_ecoli | rs2_ecoli  |
| P0A968 | CSPD_ECOLI | *    | P0A968 | P0A7V0 | cspd_ecoli | rs2_ecoli  |
| P0A968 | CSPD_ECOLI | *    | P0A968 | P0A7U7 | cspd_ecoli | rs20_ecoli |
| P0A968 | CSPD_ECOLI | *    | P0A968 | P68679 | cspd_ecoli | rs21_ecoli |
| P0A968 | CSPD_ECOLI | *    | P0A968 | P0A7V3 | cspd_ecoli | rs3_ecoli  |
| P0A968 | CSPD_ECOLI | *    | P0A968 | P0A7V8 | cspd_ecoli | rs4_ecoli  |
| P0A968 | CSPD_ECOLI | *    | P0A968 | P0A7V8 | cspd_ecoli | rs4_ecoli  |
| P0A968 | CSPD_ECOLI | *    | P0A968 | P0A7W1 | cspd_ecoli | rs5_ecoli  |
| P0A968 | CSPD_ECOLI | *    | P0A968 | P0A7W1 | cspd_ecoli | rs5_ecoli  |
| P0A968 | CSPD_ECOLI | *    | P0A968 | P02359 | cspd_ecoli | rs7_ecoli  |
| P0A968 | CSPD_ECOLI | *    | P0A968 | P02359 | cspd_ecoli | rs7_ecoli  |
| P0A968 | CSPD_ECOLI | *    | P0A968 | P0AEU7 | cspd_ecoli | skp_ecoli  |
| P0A968 | CSPD_ECOLI | *    | P0A968 | P25397 | cspd_ecoli | tehb_ecoli |
| P0A968 | CSPD_ECOLI | *    | P0A968 | P0A8A4 | cspd_ecoli | ydia_ecoli |
| P0A968 | CSPD_ECOLI | *    | P0A968 | P0AGJ5 | cspd_ecoli | yfif_ecoli |
| P69913 | CSRA_ECOLI | none |        |        |            |            |
| P0ABJ9 | CYDA_ECOLI | *    | P0ABJ9 | P0ABK2 | cyda_ecoli | cydb_ecoli |
| P0ABJ9 | CYDA_ECOLI | *    | P0ABJ9 | P0ADW3 | cyda_ecoli | yhcb_ecoli |
| P00816 | CYNS_ECOLI | *    | P00816 | P0A6Y8 | cyns_ecoli | dnak_ecoli |
| P00816 | CYNS_ECOLI | *    | P00816 | P04425 | cyns_ecoli | gshb_ecoli |
| P00816 | CYNS_ECOLI | *    | P00816 | P0A717 | cyns_ecoli | kprs_ecoli |
| P0A9F3 | CYSB_ECOLI | *    | P0A9F3 | P33195 | cysb_ecoli | gcsp_ecoli |
| P0A9F3 | CYSB_ECOLI | *    | P0A9F3 | P33602 | cysb_ecoli | nuog_ecoli |
| P0A9F3 | CYSB_ECOLI | *    | P0A9F3 | P0A8M3 | cysb_ecoli | syt_ecoli  |
| P0A9F3 | CYSB_ECOLI | *    | P0A9F3 | P37626 | cysb_ecoli | yhii_ecoli |
| P0AEA8 | CYSG_ECOLI | *    | P0AEA8 | P18843 | cysg_ecoli | nade_ecoli |
| P17854 | CYSH_ECOLI | *    | P17854 | P0A6F5 | cysh_ecoli | ch60_ecoli |
| P38038 | CYSJ_ECOLI | *    | P38038 | P0A7J0 | cysj_ecoli | ribb_ecoli |
| P0ABK5 | CYSK_ECOLI | *    | P0ABK5 | P06149 | cysk_ecoli | dld_ecoli  |
| P0ABK5 | CYSK_ECOLI | *    | P0ABK5 | P77188 | cysk_ecoli | matc_ecoli |
| P0ABK5 | CYSK_ECOLI | *    | P0ABK5 | P18843 | cysk_ecoli | nade_ecoli |
| P0ABK5 | CYSK_ECOLI | *    | P0ABK5 | P16690 | cysk_ecoli | phnn_ecoli |
| P0ABK5 | CYSK_ECOLI | *    | P0ABK5 | P60723 | cysk_ecoli | rl4_ecoli  |
| P0ABK5 | CYSK_ECOLI | *    | P0ABK5 | P0AGD3 | cysk_ecoli | sodf_ecoli |
| P0ABK5 | CYSK_ECOLI | *    | P0ABK5 | P04805 | cysk_ecoli | sye_ecoli  |

|        |            |      |        |        |            |            |
|--------|------------|------|--------|--------|------------|------------|
| POABK5 | CYSK_ECOLI | *    | POABK5 | P00962 | cysk_ecoli | syq_ecoli  |
| P16700 | CYSP_ECOLI | *    | P16700 | P0A6Y8 | cysp_ecoli | dnak_ecoli |
| P22255 | CYSQ_ECOLI | none |        |        |            |            |
| POAEB2 | DACA_ECOLI | none |        |        |            |            |
| P08506 | DACC_ECOLI | none |        |        |            |            |
| POA6J5 | DADA_ECOLI | none |        |        |            |            |
| POA6L2 | DAPA_ECOLI | *    | POA6L2 | P18843 | dapa_ecoli | nade_ecoli |
| POA6L2 | DAPA_ECOLI | *    | POA6L2 | P22525 | dapa_ecoli | ycbb_ecoli |
| P04036 | DAPB_ECOLI | none |        |        |            |            |
| POA9D8 | DAPD_ECOLI | *    | POA9D8 | P60651 | dapd_ecoli | speb_ecoli |
| POAED7 | DAPE_ECOLI | *    | POAED7 | P0A6F5 | dape_ecoli | ch60_ecoli |
| POA6K1 | DAPF_ECOLI | none |        |        |            |            |
| POACF0 | DBHA_ECOLI | *    | POACF0 | P07363 | dbha_ecoli | chea_ecoli |
| POACF0 | DBHA_ECOLI | *    | POACF0 | P0ACF4 | dbha_ecoli | dbhb_ecoli |
| POACF0 | DBHA_ECOLI | *    | POACF0 | P0A6Y8 | dbha_ecoli | dnak_ecoli |
| POACF0 | DBHA_ECOLI | *    | POACF0 | P0A6Y8 | dbha_ecoli | dnak_ecoli |
| POACF0 | DBHA_ECOLI | *    | POACF0 | P15977 | dbha_ecoli | malq_ecoli |
| POACF0 | DBHA_ECOLI | *    | POACF0 | P0A772 | dbha_ecoli | nrdi_ecoli |
| POACF0 | DBHA_ECOLI | *    | POACF0 | P76773 | dbha_ecoli | ompl_ecoli |
| POACF0 | DBHA_ECOLI | *    | POACF0 | P16690 | dbha_ecoli | phnn_ecoli |
| POACF0 | DBHA_ECOLI | *    | POACF0 | P00490 | dbha_ecoli | phsm_ecoli |
| POACF0 | DBHA_ECOLI | *    | POACF0 | P02413 | dbha_ecoli | rl15_ecoli |
| POACF0 | DBHA_ECOLI | *    | POACF0 | P60422 | dbha_ecoli | rl2_ecoli  |
| POACF0 | DBHA_ECOLI | *    | POACF0 | P60723 | dbha_ecoli | rl4_ecoli  |
| POACF0 | DBHA_ECOLI | *    | POACF0 | P37765 | dbha_ecoli | rlub_ecoli |
| POACF0 | DBHA_ECOLI | *    | POACF0 | P0A7Z4 | dbha_ecoli | rpoa_ecoli |
| POACF0 | DBHA_ECOLI | *    | POACF0 | P0A7V8 | dbha_ecoli | rs4_ecoli  |
| POACF0 | DBHA_ECOLI | *    | POACF0 | P75989 | dbha_ecoli | ycge_ecoli |
| POACF0 | DBHA_ECOLI | *    | POACF0 | P08245 | dbha_ecoli | ycih_ecoli |
| POACF4 | DBHB_ECOLI | *    | POACF4 | P0ACF0 | dbhb_ecoli | dbha_ecoli |
| POACF4 | DBHB_ECOLI | *    | POACF4 | P0AC41 | dbhb_ecoli | dhsa_ecoli |
| POACF4 | DBHB_ECOLI | *    | POACF4 | P0A6Y8 | dbhb_ecoli | dnak_ecoli |
| POACF4 | DBHB_ECOLI | *    | POACF4 | P00582 | dbhb_ecoli | dpo1_ecoli |

|        |            |   |        |        |            |             |
|--------|------------|---|--------|--------|------------|-------------|
| POACF4 | DBHB_ECOLI | * | POACF4 | P00582 | dbhb_ecoli | dpo1_ecoli  |
| POACF4 | DBHB_ECOLI | * | POACF4 | P10443 | dbhb_ecoli | dpo3a_ecoli |
| POACF4 | DBHB_ECOLI | * | POACF4 | P0A6R3 | dbhb_ecoli | fis_ecoli   |
| POACF4 | DBHB_ECOLI | * | POACF4 | P0A6W5 | dbhb_ecoli | grea_ecoli  |
| POACF4 | DBHB_ECOLI | * | POACF4 | P0ACF8 | dbhb_ecoli | hns_ecoli   |
| POACF4 | DBHB_ECOLI | * | POACF4 | P0A6Z3 | dbhb_ecoli | htpg_ecoli  |
| POACF4 | DBHB_ECOLI | * | POACF4 | P0A6X7 | dbhb_ecoli | ihfa_ecoli  |
| POACF4 | DBHB_ECOLI | * | POACF4 | P0A6Y1 | dbhb_ecoli | ihfb_ecoli  |
| POACF4 | DBHB_ECOLI | * | POACF4 | P15977 | dbhb_ecoli | malq_ecoli  |
| POACF4 | DBHB_ECOLI | * | POACF4 | P15977 | dbhb_ecoli | malq_ecoli  |
| POACF4 | DBHB_ECOLI | * | POACF4 | P18843 | dbhb_ecoli | nade_ecoli  |
| POACF4 | DBHB_ECOLI | * | POACF4 | P38489 | dbhb_ecoli | nfnb_ecoli  |
| POACF4 | DBHB_ECOLI | * | POACF4 | P0AFD1 | dbhb_ecoli | nuoe_ecoli  |
| POACF4 | DBHB_ECOLI | * | POACF4 | P15288 | dbhb_ecoli | pepd_ecoli  |
| POACF4 | DBHB_ECOLI | * | POACF4 | P00490 | dbhb_ecoli | phsm_ecoli  |
| POACF4 | DBHB_ECOLI | * | POACF4 | P00490 | dbhb_ecoli | phsm_ecoli  |
| POACF4 | DBHB_ECOLI | * | POACF4 | P36767 | dbhb_ecoli | rdgc_ecoli  |
| POACF4 | DBHB_ECOLI | * | POACF4 | P25888 | dbhb_ecoli | rhle_ecoli  |
| POACF4 | DBHB_ECOLI | * | POACF4 | P0A7L0 | dbhb_ecoli | rl1_ecoli   |
| POACF4 | DBHB_ECOLI | * | POACF4 | P0AG44 | dbhb_ecoli | rl17_ecoli  |
| POACF4 | DBHB_ECOLI | * | POACF4 | P0A7K6 | dbhb_ecoli | rl19_ecoli  |
| POACF4 | DBHB_ECOLI | * | POACF4 | P60422 | dbhb_ecoli | rl2_ecoli   |
| POACF4 | DBHB_ECOLI | * | POACF4 | P0AG48 | dbhb_ecoli | rl21_ecoli  |
| POACF4 | DBHB_ECOLI | * | POACF4 | P60438 | dbhb_ecoli | rl3_ecoli   |
| POACF4 | DBHB_ECOLI | * | POACF4 | P60438 | dbhb_ecoli | rl3_ecoli   |
| POACF4 | DBHB_ECOLI | * | POACF4 | P0A7R1 | dbhb_ecoli | rl9_ecoli   |
| POACF4 | DBHB_ECOLI | * | POACF4 | P0A7Z4 | dbhb_ecoli | rpoa_ecoli  |
| POACF4 | DBHB_ECOLI | * | POACF4 | P0A7S9 | dbhb_ecoli | rs13_ecoli  |
| POACF4 | DBHB_ECOLI | * | POACF4 | P0A7V8 | dbhb_ecoli | rs4_ecoli   |
| POACF4 | DBHB_ECOLI | * | POACF4 | P02359 | dbhb_ecoli | rs7_ecoli   |
| POACF4 | DBHB_ECOLI | * | POACF4 | P02359 | dbhb_ecoli | rs7_ecoli   |
| POACF4 | DBHB_ECOLI | * | POACF4 | P0A7X3 | dbhb_ecoli | rs9_ecoli   |
| POACF4 | DBHB_ECOLI | * | POACF4 | P0AFY8 | dbhb_ecoli | seqa_ecoli  |
| POACF4 | DBHB_ECOLI | * | POACF4 | P0AEU7 | dbhb_ecoli | skp_ecoli   |
| POACF4 | DBHB_ECOLI | * | POACF4 | P0A9K9 | dbhb_ecoli | slyd_ecoli  |
| POACF4 | DBHB_ECOLI | * | POACF4 | P08957 | dbhb_ecoli | t1mk_ecoli  |
| POACF4 | DBHB_ECOLI | * | POACF4 | P39177 | dbhb_ecoli | uspg_ecoli  |
| POACF4 | DBHB_ECOLI | * | POACF4 | P09184 | dbhb_ecoli | vsr_ecoli   |
| POACF4 | DBHB_ECOLI | * | POACF4 | P76104 | dbhb_ecoli | ydcg_ecoli  |
| POACF4 | DBHB_ECOLI | * | POACF4 | P0ACY9 | dbhb_ecoli | yebg_ecoli  |
| POACF4 | DBHB_ECOLI | * | POACF4 | P64574 | dbhb_ecoli | yghw_ecoli  |
| P69908 | DCEA_ECOLI | * | P69908 | P0A6F5 | dcea_ecoli | ch60_ecoli  |
| P69908 | DCEA_ECOLI | * | P69908 | P69910 | dcea_ecoli | dceb_ecoli  |
| P69908 | DCEA_ECOLI | * | P69908 | P69910 | dcea_ecoli | dceb_ecoli  |



|        |            |      |        |        |            |            |
|--------|------------|------|--------|--------|------------|------------|
| P69908 | DCEA_ECOLI | *    | P69908 | P69910 | dcea_ecoli | dceb_ecoli |
| P69908 | DCEA_ECOLI | *    | P69908 | P0A6Y8 | dcea_ecoli | dnak_ecoli |
| P69908 | DCEA_ECOLI | *    | P69908 | P0A6Y8 | dcea_ecoli | dnak_ecoli |
| P69908 | DCEA_ECOLI | *    | P69908 | P0A6Y8 | dcea_ecoli | dnak_ecoli |
| P69908 | DCEA_ECOLI | *    | P69908 | P13035 | dcea_ecoli | glpd_ecoli |
| P69908 | DCEA_ECOLI | *    | P69908 | P13035 | dcea_ecoli | glpd_ecoli |
| P69908 | DCEA_ECOLI | *    | P69908 | P28635 | dcea_ecoli | metq_ecoli |
| P69908 | DCEA_ECOLI | *    | P69908 | P28635 | dcea_ecoli | metq_ecoli |
| P69908 | DCEA_ECOLI | *    | P69908 | P37194 | dcea_ecoli | slp_ecoli  |
| P69908 | DCEA_ECOLI | *    | P69908 | P28043 | dcea_ecoli | ssb2_ecolx |
| P69908 | DCEA_ECOLI | *    | P69908 | P33225 | dcea_ecoli | tora_ecoli |
| P69908 | DCEA_ECOLI | *    | P69908 | P75818 | dcea_ecoli | ybjp_ecoli |
|        |            |      |        |        |            |            |
| P69910 | DCEB_ECOLI | *    | P69910 | P0A6F5 | dceb_ecoli | ch60_ecoli |
| P69910 | DCEB_ECOLI | *    | P69910 | P69908 | dceb_ecoli | dcea_ecoli |
| P69910 | DCEB_ECOLI | *    | P69910 | P69908 | dceb_ecoli | dcea_ecoli |
| P69910 | DCEB_ECOLI | *    | P69910 | P0A6Y8 | dceb_ecoli | dnak_ecoli |
| P69910 | DCEB_ECOLI | *    | P69910 | P36879 | dceb_ecoli | yadg_ecoli |
|        |            |      |        |        |            |            |
| POAED9 | DCM_ECOLI  | *    | POAED9 | P0AE12 | dcm_ecoli  | amn_ecoli  |
| POAED9 | DCM_ECOLI  | *    | POAED9 | P0A6F5 | dcm_ecoli  | ch60_ecoli |
| POAED9 | DCM_ECOLI  | *    | POAED9 | P22523 | dcm_ecoli  | mukb_ecoli |
| POAED9 | DCM_ECOLI  | *    | POAED9 | P06959 | dcm_ecoli  | odp2_ecoli |
| POAED9 | DCM_ECOLI  | *    | POAED9 | P0ACP7 | dcm_ecoli  | purr_ecoli |
| POAED9 | DCM_ECOLI  | *    | POAED9 | P0C0U4 | dcm_ecoli  | rimk_ecoli |
| POAED9 | DCM_ECOLI  | *    | POAED9 | P0A7L0 | dcm_ecoli  | rl1_ecoli  |
| POAED9 | DCM_ECOLI  | *    | POAED9 | P0AA10 | dcm_ecoli  | rl13_ecoli |
| POAED9 | DCM_ECOLI  | *    | POAED9 | P60422 | dcm_ecoli  | rl2_ecoli  |
| POAED9 | DCM_ECOLI  | *    | POAED9 | P0AG48 | dcm_ecoli  | rl21_ecoli |
| POAED9 | DCM_ECOLI  | *    | POAED9 | P61175 | dcm_ecoli  | rl22_ecoli |
| POAED9 | DCM_ECOLI  | *    | POAED9 | P60438 | dcm_ecoli  | rl3_ecoli  |
| POAED9 | DCM_ECOLI  | *    | POAED9 | P0AG59 | dcm_ecoli  | rs14_ecoli |
| POAED9 | DCM_ECOLI  | *    | POAED9 | P0A7U7 | dcm_ecoli  | rs20_ecoli |
| POAED9 | DCM_ECOLI  | *    | POAED9 | P0A7V3 | dcm_ecoli  | rs3_ecoli  |
| POAED9 | DCM_ECOLI  | *    | POAED9 | P0A7W1 | dcm_ecoli  | rs5_ecoli  |
| POAED9 | DCM_ECOLI  | *    | POAED9 | P02359 | dcm_ecoli  | rs7_ecoli  |
| POAED9 | DCM_ECOLI  | *    | POAED9 | P76339 | dcm_ecoli  | yedv_ecoli |
|        |            |      |        |        |            |            |
| P24171 | DCP_ECOLI  | *    | P24171 | P0ABA6 | dcp_ecoli  | atpg_ecoli |
| P24171 | DCP_ECOLI  | *    | P24171 | P36938 | dcp_ecoli  | pgm_ecoli  |
| P24171 | DCP_ECOLI  | *    | P24171 | P60422 | dcp_ecoli  | rl2_ecoli  |
|        |            |      |        |        |            |            |
| POABN9 | DCUB_ECOLI | none |        |        |            |            |
|        |            |      |        |        |            |            |
| POAEC8 | DCUS_ECOLI | *    | POAEC8 | P0AC41 | dcus_ecoli | dhsa_ecoli |



|        |            |          |        |            |            |
|--------|------------|----------|--------|------------|------------|
| POA6J8 | DDLA_ECOLI | * POA6J8 | P32718 | ddla_ecoli | alsk_ecoli |
| POA6J8 | DDLA_ECOLI | * POA6J8 | P69503 | ddla_ecoli | apt_ecoli  |
| POA6J8 | DDLA_ECOLI | * POA6J8 | P33363 | ddla_ecoli | bgix_ecoli |
| POA6J8 | DDLA_ECOLI | * POA6J8 | P24169 | ddla_ecoli | dcos_ecoli |
| POA6J8 | DDLA_ECOLI | * POA6J8 | P76128 | ddla_ecoli | ddpa_ecoli |
| POA6J8 | DDLA_ECOLI | * POA6J8 | P0A6Y8 | ddla_ecoli | dnak_ecoli |
| POA6J8 | DDLA_ECOLI | * POA6J8 | P0AD68 | ddla_ecoli | ftsi_ecoli |
| POA6J8 | DDLA_ECOLI | * POA6J8 | P15038 | ddla_ecoli | held_ecoli |
| POA6J8 | DDLA_ECOLI | * POA6J8 | P18843 | ddla_ecoli | nade_ecoli |
| POA6J8 | DDLA_ECOLI | * POA6J8 | P07004 | ddla_ecoli | proa_ecoli |
| POA6J8 | DDLA_ECOLI | * POA6J8 | P0ADN0 | ddla_ecoli | viaa_ecoli |
| POA6J8 | DDLA_ECOLI | * POA6J8 | P30864 | ddla_ecoli | yafc_ecoli |
| POA9P6 | DEAD_ECOLI | * POA9P6 | P0ABD5 | dead_ecoli | acca_ecoli |
| POA9P6 | DEAD_ECOLI | * POA9P6 | P0A6A8 | dead_ecoli | acp_ecoli  |
| POA9P6 | DEAD_ECOLI | * POA9P6 | Q46829 | dead_ecoli | bgla_ecoli |
| POA9P6 | DEAD_ECOLI | * POA9P6 | P0A9Y6 | dead_ecoli | cspc_ecoli |
| POA9P6 | DEAD_ECOLI | * POA9P6 | P0AEB2 | dead_ecoli | daca_ecoli |
| POA9P6 | DEAD_ECOLI | * POA9P6 | P0ACF0 | dead_ecoli | dbha_ecoli |
| POA9P6 | DEAD_ECOLI | * POA9P6 | P0ACF4 | dead_ecoli | dbhb_ecoli |
| POA9P6 | DEAD_ECOLI | * POA9P6 | P08622 | dead_ecoli | dnaj_ecoli |
| POA9P6 | DEAD_ECOLI | * POA9P6 | P0AEG1 | dead_ecoli | dppc_ecoli |
| POA9P6 | DEAD_ECOLI | * POA9P6 | P0ACZ4 | dead_ecoli | evga_ecoli |
| POA9P6 | DEAD_ECOLI | * POA9P6 | P75825 | dead_ecoli | hcp_ecoli  |
| POA9P6 | DEAD_ECOLI | * POA9P6 | P43329 | dead_ecoli | hrpa_ecoli |
| POA9P6 | DEAD_ECOLI | * POA9P6 | P0AEW6 | dead_ecoli | ingk_ecoli |
| POA9P6 | DEAD_ECOLI | * POA9P6 | P0AFG8 | dead_ecoli | odp1_ecoli |
| POA9P6 | DEAD_ECOLI | * POA9P6 | P0AFG8 | dead_ecoli | odp1_ecoli |
| POA9P6 | DEAD_ECOLI | * POA9P6 | P0A7L0 | dead_ecoli | rl1_ecoli  |
| POA9P6 | DEAD_ECOLI | * POA9P6 | P0A7L0 | dead_ecoli | rl1_ecoli  |
| POA9P6 | DEAD_ECOLI | * POA9P6 | P0A7J7 | dead_ecoli | rl11_ecoli |
| POA9P6 | DEAD_ECOLI | * POA9P6 | P0AA10 | dead_ecoli | rl13_ecoli |
| POA9P6 | DEAD_ECOLI | * POA9P6 | P0AA10 | dead_ecoli | rl13_ecoli |
| POA9P6 | DEAD_ECOLI | * POA9P6 | P0ADY7 | dead_ecoli | rl16_ecoli |
| POA9P6 | DEAD_ECOLI | * POA9P6 | P0AG44 | dead_ecoli | rl17_ecoli |
| POA9P6 | DEAD_ECOLI | * POA9P6 | P0C018 | dead_ecoli | rl18_ecoli |
| POA9P6 | DEAD_ECOLI | * POA9P6 | P0A7K6 | dead_ecoli | rl19_ecoli |
| POA9P6 | DEAD_ECOLI | * POA9P6 | P60422 | dead_ecoli | rl2_ecoli  |
| POA9P6 | DEAD_ECOLI | * POA9P6 | P60422 | dead_ecoli | rl2_ecoli  |
| POA9P6 | DEAD_ECOLI | * POA9P6 | P0AG48 | dead_ecoli | rl21_ecoli |
| POA9P6 | DEAD_ECOLI | * POA9P6 | P61175 | dead_ecoli | rl22_ecoli |
| POA9P6 | DEAD_ECOLI | * POA9P6 | P61175 | dead_ecoli | rl22_ecoli |
| POA9P6 | DEAD_ECOLI | * POA9P6 | P0ADZ0 | dead_ecoli | rl23_ecoli |
| POA9P6 | DEAD_ECOLI | * POA9P6 | P60624 | dead_ecoli | rl24_ecoli |

|        |            |   |        |        |            |            |
|--------|------------|---|--------|--------|------------|------------|
| P0A9P6 | DEAD_ECOLI | * | P0A9P6 | P0A7L8 | dead_ecoli | rl27_ecoli |
| P0A9P6 | DEAD_ECOLI | * | P0A9P6 | P0A7M2 | dead_ecoli | rl28_ecoli |
| P0A9P6 | DEAD_ECOLI | * | P0A9P6 | P60438 | dead_ecoli | rl3_ecoli  |
| P0A9P6 | DEAD_ECOLI | * | P0A9P6 | P60723 | dead_ecoli | rl4_ecoli  |
| P0A9P6 | DEAD_ECOLI | * | P0A9P6 | P0AG55 | dead_ecoli | rl6_ecoli  |
| P0A9P6 | DEAD_ECOLI | * | P0A9P6 | P0A7R1 | dead_ecoli | rl9_ecoli  |
| P0A9P6 | DEAD_ECOLI | * | P0A9P6 | P0A7R1 | dead_ecoli | rl9_ecoli  |
| P0A9P6 | DEAD_ECOLI | * | P0A9P6 | P75864 | dead_ecoli | rlml_ecoli |
| P0A9P6 | DEAD_ECOLI | * | P0A9P6 | P37765 | dead_ecoli | rlub_ecoli |
| P0A9P6 | DEAD_ECOLI | * | P0A9P6 | P37765 | dead_ecoli | rlub_ecoli |
| P0A9P6 | DEAD_ECOLI | * | P0A9P6 | P21499 | dead_ecoli | rnr_ecoli  |
| P0A9P6 | DEAD_ECOLI | * | P0A9P6 | P21499 | dead_ecoli | rnr_ecoli  |
| P0A9P6 | DEAD_ECOLI | * | P0A9P6 | P0AG67 | dead_ecoli | rs1_ecoli  |
| P0A9P6 | DEAD_ECOLI | * | P0A9P6 | P0AG67 | dead_ecoli | rs1_ecoli  |
| P0A9P6 | DEAD_ECOLI | * | P0A9P6 | P0A7R5 | dead_ecoli | rs10_ecoli |
| P0A9P6 | DEAD_ECOLI | * | P0A9P6 | P0A7R9 | dead_ecoli | rs11_ecoli |
| P0A9P6 | DEAD_ECOLI | * | P0A9P6 | P0A7S9 | dead_ecoli | rs13_ecoli |
| P0A9P6 | DEAD_ECOLI | * | P0A9P6 | P0A7S9 | dead_ecoli | rs13_ecoli |
| P0A9P6 | DEAD_ECOLI | * | P0A9P6 | P0AG59 | dead_ecoli | rs14_ecoli |
| P0A9P6 | DEAD_ECOLI | * | P0A9P6 | P0ADZ4 | dead_ecoli | rs15_ecoli |
| P0A9P6 | DEAD_ECOLI | * | P0A9P6 | P0A7T3 | dead_ecoli | rs16_ecoli |
| P0A9P6 | DEAD_ECOLI | * | P0A9P6 | P0A7T7 | dead_ecoli | rs18_ecoli |
| P0A9P6 | DEAD_ECOLI | * | P0A9P6 | P0A7U3 | dead_ecoli | rs19_ecoli |
| P0A9P6 | DEAD_ECOLI | * | P0A9P6 | P0A7V0 | dead_ecoli | rs2_ecoli  |
| P0A9P6 | DEAD_ECOLI | * | P0A9P6 | P0A7V0 | dead_ecoli | rs2_ecoli  |
| P0A9P6 | DEAD_ECOLI | * | P0A9P6 | P0A7U7 | dead_ecoli | rs20_ecoli |
| P0A9P6 | DEAD_ECOLI | * | P0A9P6 | P68679 | dead_ecoli | rs21_ecoli |
| P0A9P6 | DEAD_ECOLI | * | P0A9P6 | P68679 | dead_ecoli | rs21_ecoli |
| P0A9P6 | DEAD_ECOLI | * | P0A9P6 | P0A7V3 | dead_ecoli | rs3_ecoli  |
| P0A9P6 | DEAD_ECOLI | * | P0A9P6 | P0A7V3 | dead_ecoli | rs3_ecoli  |
| P0A9P6 | DEAD_ECOLI | * | P0A9P6 | P0A7V8 | dead_ecoli | rs4_ecoli  |
| P0A9P6 | DEAD_ECOLI | * | P0A9P6 | P0A7V8 | dead_ecoli | rs4_ecoli  |
| P0A9P6 | DEAD_ECOLI | * | P0A9P6 | P0A7W1 | dead_ecoli | rs5_ecoli  |
| P0A9P6 | DEAD_ECOLI | * | P0A9P6 | P0A7W1 | dead_ecoli | rs5_ecoli  |
| P0A9P6 | DEAD_ECOLI | * | P0A9P6 | P02358 | dead_ecoli | rs6_ecoli  |
| P0A9P6 | DEAD_ECOLI | * | P0A9P6 | P02359 | dead_ecoli | rs7_ecoli  |
| P0A9P6 | DEAD_ECOLI | * | P0A9P6 | P02359 | dead_ecoli | rs7_ecoli  |
| P0A9P6 | DEAD_ECOLI | * | P0A9P6 | P0A7W7 | dead_ecoli | rs8_ecoli  |
| P0A9P6 | DEAD_ECOLI | * | P0A9P6 | P0A7X3 | dead_ecoli | rs9_ecoli  |
| P0A9P6 | DEAD_ECOLI | * | P0A9P6 | P76502 | dead_ecoli | sixa_ecoli |
| P0A9P6 | DEAD_ECOLI | * | P0A9P6 | P21507 | dead_ecoli | srmb_ecoli |
| P0A9P6 | DEAD_ECOLI | * | P0A9P6 | P0AGE9 | dead_ecoli | sucd_ecoli |
| P0A9P6 | DEAD_ECOLI | * | P0A9P6 | P77499 | dead_ecoli | sufc_ecoli |
| P0A9P6 | DEAD_ECOLI | * | P0A9P6 | P0AGM7 | dead_ecoli | uraa_ecoli |
| P0A9P6 | DEAD_ECOLI | * | P0A9P6 | P0AGJ5 | dead_ecoli | yfif_ecoli |

|        |            |   |        |        |                            |                            |
|--------|------------|---|--------|--------|----------------------------|----------------------------|
| P0A9P6 | DEAD_ECOLI | * | P0A9P6 | P0AGJ5 | <a href="#">dead_ecoli</a> | <a href="#">yfif_ecoli</a> |
| P0A9P6 | DEAD_ECOLI | * | P0A9P6 | P30871 | <a href="#">dead_ecoli</a> | <a href="#">ygif_ecoli</a> |
| P0A9P6 | DEAD_ECOLI | * | P0A9P6 | P37634 | <a href="#">dead_ecoli</a> | <a href="#">yhir_ecoli</a> |
| P0A9P6 | DEAD_ECOLI | * | P0A9P6 | P32138 | <a href="#">dead_ecoli</a> | <a href="#">yihq_ecoli</a> |
| P0A6K3 | DEF_ECOLI  | * | P0A6K3 | P60723 | <a href="#">def_ecoli</a>  | <a href="#">rl4_ecoli</a>  |
| P0A6K3 | DEF_ECOLI  | * | P0A6K3 | P08390 | <a href="#">def_ecoli</a>  | <a href="#">usg_ecoli</a>  |
| P0A6K3 | DEF_ECOLI  | * | P0A6K3 | P28634 | <a href="#">def_ecoli</a>  | <a href="#">yaeb_ecoli</a> |
| P0C0V0 | DEGP_ECOLI | * | P0C0V0 | P0A6Y8 | <a href="#">degp_ecoli</a> | <a href="#">dnak_ecoli</a> |
| P0A6K6 | DEOB_ECOLI | * | P0A6K6 | P75969 | <a href="#">deob_ecoli</a> | <a href="#">inte_ecoli</a> |
| P0A6K6 | DEOB_ECOLI | * | P0A6K6 | P0A7K6 | <a href="#">deob_ecoli</a> | <a href="#">rl19_ecoli</a> |
| P0A6K6 | DEOB_ECOLI | * | P0A6K6 | P0AFX9 | <a href="#">deob_ecoli</a> | <a href="#">rseb_ecoli</a> |
| P0A6K6 | DEOB_ECOLI | * | P0A6K6 | P75804 | <a href="#">deob_ecoli</a> | <a href="#">ylii_ecoli</a> |
| P0A6L0 | DEOC_ECOLI | * | P0A6L0 | P18843 | <a href="#">deoc_ecoli</a> | <a href="#">nade_ecoli</a> |
| P0A6L0 | DEOC_ECOLI | * | P0A6L0 | P15288 | <a href="#">deoc_ecoli</a> | <a href="#">pepd_ecoli</a> |
| P0A6L0 | DEOC_ECOLI | * | P0A6L0 | P04805 | <a href="#">deoc_ecoli</a> | <a href="#">syecoli</a>    |
| P0ABP8 | DEOD_ECOLI | * | P0ABP8 | P0A7E9 | <a href="#">deod_ecoli</a> | <a href="#">pyrh_ecoli</a> |
| P76015 | DHAK_ECOLI | * | P76015 | P60560 | <a href="#">dhak_ecoli</a> | <a href="#">guac_ecoli</a> |
| P76015 | DHAK_ECOLI | * | P76015 | P37624 | <a href="#">dhak_ecoli</a> | <a href="#">yhih_ecoli</a> |
| P37349 | DHAM_ECOLI |   | none   |        |                            |                            |
| P76016 | DHAR_ECOLI |   | none   |        |                            |                            |
| P0A9Q9 | DHAS_ECOLI | * | P0A9Q9 | P0A6Y8 | <a href="#">dhas_ecoli</a> | <a href="#">dnak_ecoli</a> |
| P00393 | DHNA_ECOLI | * | P00393 | P0A6B4 | <a href="#">dhna_ecoli</a> | <a href="#">alr1_ecoli</a> |
| P00393 | DHNA_ECOLI | * | P00393 | P67910 | <a href="#">dhna_ecoli</a> | <a href="#">hldd_ecoli</a> |
| P00393 | DHNA_ECOLI | * | P00393 | P76773 | <a href="#">dhna_ecoli</a> | <a href="#">ompl_ecoli</a> |
| P00393 | DHNA_ECOLI | * | P00393 | P60422 | <a href="#">dhna_ecoli</a> | <a href="#">rl2_ecoli</a>  |
| P00393 | DHNA_ECOLI | * | P00393 | P0A7V3 | <a href="#">dhna_ecoli</a> | <a href="#">rs3_ecoli</a>  |
| P00393 | DHNA_ECOLI | * | P00393 | P0A7X3 | <a href="#">dhna_ecoli</a> | <a href="#">rs9_ecoli</a>  |
| P0AC13 | DHPS_ECOLI |   | none   |        |                            |                            |
| P0AC41 | DHSA_ECOLI | * | P0AC41 | P07014 | <a href="#">dhsa_ecoli</a> | <a href="#">dhsb_ecoli</a> |
| P0AC41 | DHSA_ECOLI | * | P0AC41 | P07014 | <a href="#">dhsa_ecoli</a> | <a href="#">dhsb_ecoli</a> |
| P0AC41 | DHSA_ECOLI | * | P0AC41 | P07014 | <a href="#">dhsa_ecoli</a> | <a href="#">dhsb_ecoli</a> |
| P0AC41 | DHSA_ECOLI | * | P0AC41 | P69054 | <a href="#">dhsa_ecoli</a> | <a href="#">dhsc_ecoli</a> |
| P0AC41 | DHSA_ECOLI | * | P0AC41 | P69054 | <a href="#">dhsa_ecoli</a> | <a href="#">dhsc_ecoli</a> |

|        |            |   |        |        |            |            |
|--------|------------|---|--------|--------|------------|------------|
| P0AC41 | DHSA_ECOLI | * | P0AC41 | P0AC44 | dhsa_ecoli | dhsd_ecoli |
| P0AC41 | DHSA_ECOLI | * | P0AC41 | P0AC44 | dhsa_ecoli | dhsd_ecoli |
| P0AC41 | DHSA_ECOLI | * | P0AC41 | P18843 | dhsa_ecoli | nade_ecoli |
| P06966 | DICA_ECOLI | * | P06966 | P0A6Y8 | dica_ecoli | dnak_ecoli |
| P06966 | DICA_ECOLI | * | P06966 | P0C077 | dica_ecoli | rele_ecoli |
| P06966 | DICA_ECOLI | * | P06966 | P0A7U7 | dica_ecoli | rs20_ecoli |
| P06966 | DICA_ECOLI | * | P06966 | P0A7V8 | dica_ecoli | rs4_ecoli  |
| P06966 | DICA_ECOLI | * | P06966 | P68206 | dica_ecoli | ybjj_ecoli |
| Q46857 | DKGA_ECOLI |   | none   |        |            |            |
| P0ABS1 | DKSA_ECOLI | * | P0ABS1 | P0A6F3 | dksa_ecoli | glpk_ecoli |
| P0ABS1 | DKSA_ECOLI | * | P0ABS1 | P0A6W5 | dksa_ecoli | grea_ecoli |
| P0ABS1 | DKSA_ECOLI | * | P0ABS1 | P37651 | dksa_ecoli | gun_ecoli  |
| P0ABS1 | DKSA_ECOLI | * | P0ABS1 | P15288 | dksa_ecoli | pepd_ecoli |
| P0ABS1 | DKSA_ECOLI | * | P0ABS1 | P39177 | dksa_ecoli | uspg_ecoli |
| P0ABS1 | DKSA_ECOLI | * | P0ABS1 | P31063 | dksa_ecoli | yedd_ecoli |
| P0ABS1 | DKSA_ECOLI | * | P0ABS1 | P77536 | dksa_ecoli | ykgf_ecoli |
| P0ABS1 | DKSA_ECOLI | * | P0ABS1 | P76148 | dksa_ecoli | yneg_ecoli |
| P0A9P0 | DLDH_ECOLI | * | P0A9P0 | P0A6B7 | dldh_ecoli | iscs_ecoli |
| P0A9P0 | DLDH_ECOLI | * | P0A9P0 | P0AFG8 | dldh_ecoli | odp1_ecoli |
| P0A9P0 | DLDH_ECOLI | * | P0A9P0 | P06959 | dldh_ecoli | odp2_ecoli |
| P0A9P0 | DLDH_ECOLI | * | P0A9P0 | P0A7J0 | dldh_ecoli | ribb_ecoli |
| P0AEE8 | DMA_ECOLI  | * | P0AEE8 | P0A6F5 | dma_ecoli  | ch60_ecoli |
| P0AEE8 | DMA_ECOLI  | * | P0AEE8 | P0A9P0 | dma_ecoli  | dldh_ecoli |
| P0AEE8 | DMA_ECOLI  | * | P0AEE8 | P0A9P0 | dma_ecoli  | dldh_ecoli |
| P0AEE8 | DMA_ECOLI  | * | P0AEE8 | P10805 | dma_ecoli  | envy_ecoli |
| P0AEE8 | DMA_ECOLI  | * | P0AEE8 | P13035 | dma_ecoli  | glpd_ecoli |
| P0AEE8 | DMA_ECOLI  | * | P0AEE8 | P0A6Z3 | dma_ecoli  | htpg_ecoli |
| P0AEE8 | DMA_ECOLI  | * | P0AEE8 | P19319 | dma_ecoli  | narz_ecoli |
| P0AEE8 | DMA_ECOLI  | * | P0AEE8 | P0AFG8 | dma_ecoli  | odp1_ecoli |
| P0AEE8 | DMA_ECOLI  | * | P0AEE8 | P0A7L0 | dma_ecoli  | rl1_ecoli  |
| P0AEE8 | DMA_ECOLI  | * | P0AEE8 | P0AG44 | dma_ecoli  | rl17_ecoli |
| P0AEE8 | DMA_ECOLI  | * | P0AEE8 | P0A7K6 | dma_ecoli  | rl19_ecoli |
| P0AEE8 | DMA_ECOLI  | * | P0AEE8 | P61175 | dma_ecoli  | rl22_ecoli |
| P0AEE8 | DMA_ECOLI  | * | P0AEE8 | P60723 | dma_ecoli  | rl4_ecoli  |
| P0AEE8 | DMA_ECOLI  | * | P0AEE8 | P0A8V2 | dma_ecoli  | rpob_ecoli |
| P0AEE8 | DMA_ECOLI  | * | P0AEE8 | P0A8T7 | dma_ecoli  | rpoc_ecoli |
| P0AEE8 | DMA_ECOLI  | * | P0AEE8 | P0A7S9 | dma_ecoli  | rs13_ecoli |
| P0AEE8 | DMA_ECOLI  | * | P0AEE8 | P0A7V3 | dma_ecoli  | rs3_ecoli  |
| P0AEE8 | DMA_ECOLI  | * | P0AEE8 | P0A7V8 | dma_ecoli  | rs4_ecoli  |
| P0AEE8 | DMA_ECOLI  | * | P0AEE8 | P02359 | dma_ecoli  | rs7_ecoli  |

|        |            |   |        |        |                            |                             |
|--------|------------|---|--------|--------|----------------------------|-----------------------------|
| P0AEE8 | DMA_ECOLI  | * | P0AEE8 | P0A8L1 | <a href="#">dma_ecoli</a>  | <a href="#">sys_ecoli</a>   |
| P0AEE8 | DMA_ECOLI  | * | P0AEE8 | P39306 | <a href="#">dma_ecoli</a>  | <a href="#">ulaf_ecoli</a>  |
| P0AEE8 | DMA_ECOLI  | * | P0AEE8 | P0A8B5 | <a href="#">dma_ecoli</a>  | <a href="#">ybab_ecoli</a>  |
| P0AEE8 | DMA_ECOLI  | * | P0AEE8 | P32685 | <a href="#">dma_ecoli</a>  | <a href="#">yjbd_ecoli</a>  |
| P0AEE8 | DMA_ECOLI  | * | P0AEE8 | P37342 | <a href="#">dma_ecoli</a>  | <a href="#">yji_ecoli</a>   |
| P69853 | DMSD_ECOLI |   | none   |        |                            |                             |
| P08622 | DNAJ_ECOLI | * | P08622 | P22333 | <a href="#">dnaj_ecoli</a> | <a href="#">add_ecoli</a>   |
| P08622 | DNAJ_ECOLI | * | P08622 | P0ABB4 | <a href="#">dnaj_ecoli</a> | <a href="#">atpb_ecoli</a>  |
| P08622 | DNAJ_ECOLI | * | P08622 | P0ABH9 | <a href="#">dnaj_ecoli</a> | <a href="#">clpa_ecoli</a>  |
| P08622 | DNAJ_ECOLI | * | P08622 | P0A9P6 | <a href="#">dnaj_ecoli</a> | <a href="#">dead_ecoli</a>  |
| P08622 | DNAJ_ECOLI | * | P08622 | P0A6Y8 | <a href="#">dnaj_ecoli</a> | <a href="#">dnak_ecoli</a>  |
| P08622 | DNAJ_ECOLI | * | P08622 | P0A6Y8 | <a href="#">dnaj_ecoli</a> | <a href="#">dnak_ecoli</a>  |
| P08622 | DNAJ_ECOLI | * | P08622 | P0A6Y8 | <a href="#">dnaj_ecoli</a> | <a href="#">dnak_ecoli</a>  |
| P08622 | DNAJ_ECOLI | * | P08622 | P0A6Y8 | <a href="#">dnaj_ecoli</a> | <a href="#">dnak_ecoli</a>  |
| P08622 | DNAJ_ECOLI | * | P08622 | P0A6Y8 | <a href="#">dnaj_ecoli</a> | <a href="#">dnak_ecoli</a>  |
| P08622 | DNAJ_ECOLI | * | P08622 | POCE47 | <a href="#">dnaj_ecoli</a> | <a href="#">eftu1_ecoli</a> |
| P08622 | DNAJ_ECOLI | * | P08622 | POC8J6 | <a href="#">dnaj_ecoli</a> | <a href="#">gaty_ecoli</a>  |
| P08622 | DNAJ_ECOLI | * | P08622 | P0A705 | <a href="#">dnaj_ecoli</a> | <a href="#">if2_ecoli</a>   |
| P08622 | DNAJ_ECOLI | * | P08622 | P31554 | <a href="#">dnaj_ecoli</a> | <a href="#">lptd_ecoli</a>  |
| P08622 | DNAJ_ECOLI | * | P08622 | P0AEX9 | <a href="#">dnaj_ecoli</a> | <a href="#">male_ecoli</a>  |
| P08622 | DNAJ_ECOLI | * | P08622 | P06993 | <a href="#">dnaj_ecoli</a> | <a href="#">malt_ecoli</a>  |
| P08622 | DNAJ_ECOLI | * | P08622 | P0A817 | <a href="#">dnaj_ecoli</a> | <a href="#">metk_ecoli</a>  |
| P08622 | DNAJ_ECOLI | * | P08622 | P0A6U3 | <a href="#">dnaj_ecoli</a> | <a href="#">mnmg_ecoli</a>  |
| P08622 | DNAJ_ECOLI | * | P08622 | P0A9X4 | <a href="#">dnaj_ecoli</a> | <a href="#">mreb_ecoli</a>  |
| P08622 | DNAJ_ECOLI | * | P08622 | P22523 | <a href="#">dnaj_ecoli</a> | <a href="#">mukb_ecoli</a>  |
| P08622 | DNAJ_ECOLI | * | P08622 | P09152 | <a href="#">dnaj_ecoli</a> | <a href="#">narg_ecoli</a>  |
| P08622 | DNAJ_ECOLI | * | P08622 | P0AFG6 | <a href="#">dnaj_ecoli</a> | <a href="#">odo2_ecoli</a>  |
| P08622 | DNAJ_ECOLI | * | P08622 | P0AFG8 | <a href="#">dnaj_ecoli</a> | <a href="#">odp1_ecoli</a>  |
| P08622 | DNAJ_ECOLI | * | P08622 | P05459 | <a href="#">dnaj_ecoli</a> | <a href="#">pdx_b_ecoli</a> |
| P08622 | DNAJ_ECOLI | * | P08622 | P0AAH0 | <a href="#">dnaj_ecoli</a> | <a href="#">pstb_ecoli</a>  |
| P08622 | DNAJ_ECOLI | * | P08622 | P0A7G6 | <a href="#">dnaj_ecoli</a> | <a href="#">reca_ecoli</a>  |
| P08622 | DNAJ_ECOLI | * | P08622 | POC077 | <a href="#">dnaj_ecoli</a> | <a href="#">rele_ecoli</a>  |
| P08622 | DNAJ_ECOLI | * | P08622 | P0AG30 | <a href="#">dnaj_ecoli</a> | <a href="#">rho_ecoli</a>   |
| P08622 | DNAJ_ECOLI | * | P08622 | P0A7L0 | <a href="#">dnaj_ecoli</a> | <a href="#">rl1_ecoli</a>   |
| P08622 | DNAJ_ECOLI | * | P08622 | P0A7J3 | <a href="#">dnaj_ecoli</a> | <a href="#">rl10_ecoli</a>  |
| P08622 | DNAJ_ECOLI | * | P08622 | P0A7K6 | <a href="#">dnaj_ecoli</a> | <a href="#">rl19_ecoli</a>  |
| P08622 | DNAJ_ECOLI | * | P08622 | P61175 | <a href="#">dnaj_ecoli</a> | <a href="#">rl22_ecoli</a>  |
| P08622 | DNAJ_ECOLI | * | P08622 | P0ADZ0 | <a href="#">dnaj_ecoli</a> | <a href="#">rl23_ecoli</a>  |
| P08622 | DNAJ_ECOLI | * | P08622 | P60624 | <a href="#">dnaj_ecoli</a> | <a href="#">rl24_ecoli</a>  |
| P08622 | DNAJ_ECOLI | * | P08622 | P0A8T7 | <a href="#">dnaj_ecoli</a> | <a href="#">rpoc_ecoli</a>  |
| P08622 | DNAJ_ECOLI | * | P08622 | P0A7R5 | <a href="#">dnaj_ecoli</a> | <a href="#">rs10_ecoli</a>  |
| P08622 | DNAJ_ECOLI | * | P08622 | P0A7R5 | <a href="#">dnaj_ecoli</a> | <a href="#">rs10_ecoli</a>  |
| P08622 | DNAJ_ECOLI | * | P08622 | P0A7S9 | <a href="#">dnaj_ecoli</a> | <a href="#">rs13_ecoli</a>  |

|        |            |   |        |        |            |             |
|--------|------------|---|--------|--------|------------|-------------|
| P08622 | DNAJ_ECOLI | * | P08622 | P0AG59 | dnaj_ecoli | rs14_ecoli  |
| P08622 | DNAJ_ECOLI | * | P08622 | P0A7V0 | dnaj_ecoli | rs2_ecoli   |
| P08622 | DNAJ_ECOLI | * | P08622 | P0A7W1 | dnaj_ecoli | rs5_ecoli   |
| P08622 | DNAJ_ECOLI | * | P08622 | P02358 | dnaj_ecoli | rs6_ecoli   |
| P08622 | DNAJ_ECOLI | * | P08622 | P21507 | dnaj_ecoli | srmb_ecoli  |
| P08622 | DNAJ_ECOLI | * | P08622 | P0AGG4 | dnaj_ecoli | thio2_ecoli |
| P08622 | DNAJ_ECOLI | * | P08622 | P68206 | dnaj_ecoli | ybjb_ecoli  |
|        |            |   |        |        |            |             |
| P0A6Y8 | DNAK_ECOLI | * | P0A6Y8 | P69908 | dnak_ecoli | dcea_ecoli  |
| P0A6Y8 | DNAK_ECOLI | * | P0A6Y8 | P69910 | dnak_ecoli | dceb_ecoli  |
| P0A6Y8 | DNAK_ECOLI | * | P0A6Y8 | P45428 | dnak_ecoli | dcud_ecoli  |
| P0A6Y8 | DNAK_ECOLI | * | P0A6Y8 | P0CE47 | dnak_ecoli | eftu1_ecoli |
| P0A6Y8 | DNAK_ECOLI | * | P0A6Y8 | P0CE47 | dnak_ecoli | eftu1_ecoli |
| P0A6Y8 | DNAK_ECOLI | * | P0A6Y8 | P0ADI4 | dnak_ecoli | entb_ecoli  |
| P0A6Y8 | DNAK_ECOLI | * | P0A6Y8 | P0A953 | dnak_ecoli | fabb_ecoli  |
| P0A6Y8 | DNAK_ECOLI | * | P0A6Y8 | P09372 | dnak_ecoli | grpe_ecoli  |
| P0A6Y8 | DNAK_ECOLI | * | P0A6Y8 | P09372 | dnak_ecoli | grpe_ecoli  |
| P0A6Y8 | DNAK_ECOLI | * | P0A6Y8 | P09372 | dnak_ecoli | grpe_ecoli  |
| P0A6Y8 | DNAK_ECOLI | * | P0A6Y8 | P0AES4 | dnak_ecoli | gyra_ecoli  |
| P0A6Y8 | DNAK_ECOLI | * | P0A6Y8 | P06986 | dnak_ecoli | his8_ecoli  |
| P0A6Y8 | DNAK_ECOLI | * | P0A6Y8 | P0A6Z1 | dnak_ecoli | hsca_ecoli  |
| P0A6Y8 | DNAK_ECOLI | * | P0A6Y8 | P0A6Z3 | dnak_ecoli | htpg_ecoli  |
| P0A6Y8 | DNAK_ECOLI | * | P0A6Y8 | P14509 | dnak_ecoli | kka8_ecolx  |
| P0A6Y8 | DNAK_ECOLI | * | P0A6Y8 | P0A9M0 | dnak_ecoli | lon_ecoli   |
| P0A6Y8 | DNAK_ECOLI | * | P0A6Y8 | P27896 | dnak_ecoli | narq_ecoli  |
| P0A6Y8 | DNAK_ECOLI | * | P0A6Y8 | P37095 | dnak_ecoli | pepb_ecoli  |
| P0A6Y8 | DNAK_ECOLI | * | P0A6Y8 | P0A7J3 | dnak_ecoli | rl10_ecoli  |
| P0A6Y8 | DNAK_ECOLI | * | P0A6Y8 | P0A7K6 | dnak_ecoli | rl19_ecoli  |
| P0A6Y8 | DNAK_ECOLI | * | P0A6Y8 | P0A7N9 | dnak_ecoli | rl33_ecoli  |
| P0A6Y8 | DNAK_ECOLI | * | P0A6Y8 | P60723 | dnak_ecoli | rl4_ecoli   |
| P0A6Y8 | DNAK_ECOLI | * | P0A6Y8 | P0AG55 | dnak_ecoli | rl6_ecoli   |
| P0A6Y8 | DNAK_ECOLI | * | P0A6Y8 | P0A7R1 | dnak_ecoli | rl9_ecoli   |
| P0A6Y8 | DNAK_ECOLI | * | P0A6Y8 | P21513 | dnak_ecoli | rne_ecoli   |
| P0A6Y8 | DNAK_ECOLI | * | P0A6Y8 | P0AG67 | dnak_ecoli | rs1_ecoli   |
| P0A6Y8 | DNAK_ECOLI | * | P0A6Y8 | P0A7V0 | dnak_ecoli | rs2_ecoli   |
| P0A6Y8 | DNAK_ECOLI | * | P0A6Y8 | P0A7V0 | dnak_ecoli | rs2_ecoli   |
| P0A6Y8 | DNAK_ECOLI | * | P0A6Y8 | Q47622 | dnak_ecoli | sapa_ecoli  |
| P0A6Y8 | DNAK_ECOLI | * | P0A6Y8 | P00957 | dnak_ecoli | sya_ecoli   |
| P0A6Y8 | DNAK_ECOLI | * | P0A6Y8 | P21889 | dnak_ecoli | syd_ecoli   |
| P0A6Y8 | DNAK_ECOLI | * | P0A6Y8 | P16659 | dnak_ecoli | syp_ecoli   |
| P0A6Y8 | DNAK_ECOLI | * | P0A6Y8 | P42630 | dnak_ecoli | tdcg_ecoli  |
| P0A6Y8 | DNAK_ECOLI | * | P0A6Y8 | P77730 | dnak_ecoli | ydcrc_ecoli |
| P0A6Y8 | DNAK_ECOLI | * | P0A6Y8 | P77228 | dnak_ecoli | ydfj_ecoli  |
| P0A6Y8 | DNAK_ECOLI | * | P0A6Y8 | P0ADK6 | dnak_ecoli | yiba_ecoli  |
| P0A6Y8 | DNAK_ECOLI | * | P0A6Y8 | P32134 | dnak_ecoli | yihm_ecoli  |



|        |             |          |        |             |             |
|--------|-------------|----------|--------|-------------|-------------|
| P76129 | DOSP_ECOLI  | * P76129 | P45395 | dosp_ecoli  | kdsd_ecoli  |
| P76129 | DOSP_ECOLI  | * P76129 | P0A867 | dosp_ecoli  | tala_ecoli  |
| P0A988 | DPO3B_ECOLI | * P0A988 | P28630 | dpo3b_ecoli | hola_ecoli  |
| P0A988 | DPO3B_ECOLI | * P0A988 | P28630 | dpo3b_ecoli | hola_ecoli  |
| P0ABT2 | DPS_ECOLI   | * P0ABT2 | P0A9P6 | dps_ecoli   | dead_ecoli  |
| P0ABT2 | DPS_ECOLI   | * P0ABT2 | P0A6X3 | dps_ecoli   | hfq_ecoli   |
| P0ABT2 | DPS_ECOLI   | * P0ABT2 | P67910 | dps_ecoli   | hldd_ecoli  |
| P0ABT2 | DPS_ECOLI   | * P0ABT2 | P67910 | dps_ecoli   | hldd_ecoli  |
| P0ABT2 | DPS_ECOLI   | * P0ABT2 | P43329 | dps_ecoli   | hrpa_ecoli  |
| P0ABT2 | DPS_ECOLI   | * P0ABT2 | P0A9M0 | dps_ecoli   | lon_ecoli   |
| P0ABT2 | DPS_ECOLI   | * P0ABT2 | P76045 | dps_ecoli   | ompg_ecoli  |
| P0ABT2 | DPS_ECOLI   | * P0ABT2 | P0ADZ0 | dps_ecoli   | rl23_ecoli  |
| P0ABT2 | DPS_ECOLI   | * P0ABT2 | P60624 | dps_ecoli   | rl24_ecoli  |
| P0ABT2 | DPS_ECOLI   | * P0ABT2 | P0A7R5 | dps_ecoli   | rs10_ecoli  |
| P0ABT2 | DPS_ECOLI   | * P0ABT2 | P0A7W1 | dps_ecoli   | rs5_ecoli   |
| P0ABT2 | DPS_ECOLI   | * P0ABT2 | P02358 | dps_ecoli   | rs6_ecoli   |
| P0ABT2 | DPS_ECOLI   | * P0ABT2 | P0A7W7 | dps_ecoli   | rs8_ecoli   |
| P0ABT2 | DPS_ECOLI   | * P0ABT2 | P0AEU7 | dps_ecoli   | skp_ecoli   |
| P0ABT2 | DPS_ECOLI   | * P0ABT2 | P0A9K9 | dps_ecoli   | slyd_ecoli  |
| P0ABT2 | DPS_ECOLI   | * P0ABT2 | P0A862 | dps_ecoli   | tpx_ecoli   |
| P0ABT2 | DPS_ECOLI   | * P0ABT2 | P0ADK8 | dps_ecoli   | yibl_ecoli  |
| P32695 | DUSA_ECOLI  | none     |        |             |             |
| P77488 | DXS_ECOLI   | * P77488 | P0A9Q7 | dxs_ecoli   | adhe_ecoli  |
| P77488 | DXS_ECOLI   | * P77488 | P05052 | dxs_ecoli   | appy_ecoli  |
| P77488 | DXS_ECOLI   | * P77488 | P00722 | dxs_ecoli   | bgal_ecoli  |
| P77488 | DXS_ECOLI   | * P77488 | P0ABH9 | dxs_ecoli   | clpa_ecoli  |
| P77488 | DXS_ECOLI   | * P77488 | P0A9X9 | dxs_ecoli   | cspa_ecoli  |
| P77488 | DXS_ECOLI   | * P77488 | P0CE47 | dxs_ecoli   | eftu1_ecoli |
| P77488 | DXS_ECOLI   | * P77488 | P24183 | dxs_ecoli   | fdng_ecoli  |
| P77488 | DXS_ECOLI   | * P77488 | P09831 | dxs_ecoli   | gltb_ecoli  |
| P77488 | DXS_ECOLI   | * P77488 | P0A9M0 | dxs_ecoli   | lon_ecoli   |
| P77488 | DXS_ECOLI   | * P77488 | P0A9X4 | dxs_ecoli   | mreb_ecoli  |
| P77488 | DXS_ECOLI   | * P77488 | P0AFG8 | dxs_ecoli   | odp1_ecoli  |
| P77488 | DXS_ECOLI   | * P77488 | P0AAH0 | dxs_ecoli   | pstb_ecoli  |
| P77488 | DXS_ECOLI   | * P77488 | P0A7G6 | dxs_ecoli   | reca_ecoli  |
| P77488 | DXS_ECOLI   | * P77488 | P0AG30 | dxs_ecoli   | rho_ecoli   |
| P77488 | DXS_ECOLI   | * P77488 | P0A843 | dxs_ecoli   | tate_ecoli  |
| P77488 | DXS_ECOLI   | * P77488 | P39336 | dxs_ecoli   | yjgl_ecoli  |
| P77488 | DXS_ECOLI   | * P77488 | Q46942 | dxs_ecoli   | yqei_ecoli  |



|        |             |          |        |             |             |
|--------|-------------|----------|--------|-------------|-------------|
| P0ADB7 | ECNB_ECOLI  | none     |        |             |             |
| P23827 | ECOT_ECOLI  | * P23827 | P23827 | ecot_ecoli  | ecot_ecoli  |
| P0A6M8 | EFG_ECOLI   | * P0A6M8 | P69503 | efg_ecoli   | apt_ecoli   |
| P0A6M8 | EFG_ECOLI   | * P0A6M8 | P07639 | efg_ecoli   | arob_ecoli  |
| P0A6M8 | EFG_ECOLI   | * P0A6M8 | P0A9I1 | efg_ecoli   | cite_ecoli  |
| P0A6M8 | EFG_ECOLI   | * P0A6M8 | P0A6P1 | efg_ecoli   | efts_ecoli  |
| P0A6M8 | EFG_ECOLI   | * P0A6M8 | P0A6P1 | efg_ecoli   | efts_ecoli  |
| P0A6M8 | EFG_ECOLI   | * P0A6M8 | P0CE47 | efg_ecoli   | eftu1_ecoli |
| P0A6M8 | EFG_ECOLI   | * P0A6M8 | P0CE47 | efg_ecoli   | eftu1_ecoli |
| P0A6M8 | EFG_ECOLI   | * P0A6M8 | P0CE47 | efg_ecoli   | eftu1_ecoli |
| P0A6M8 | EFG_ECOLI   | * P0A6M8 | P33129 | efg_ecoli   | htre_ecoli  |
| P0A6M8 | EFG_ECOLI   | * P0A6M8 | P18843 | efg_ecoli   | nade_ecoli  |
| P0A6M8 | EFG_ECOLI   | * P0A6M8 | P04983 | efg_ecoli   | rbsa_ecoli  |
| P0A6M8 | EFG_ECOLI   | * P0A6M8 | P16916 | efg_ecoli   | rhsa_ecoli  |
| P0A6M8 | EFG_ECOLI   | * P0A6M8 | P61887 | efg_ecoli   | rmla2_ecoli |
| P0A6M8 | EFG_ECOLI   | * P0A6M8 | P75828 | efg_ecoli   | ybjd_ecoli  |
| P0A6M8 | EFG_ECOLI   | * P0A6M8 | P76204 | efg_ecoli   | ydiv_ecoli  |
| P0A6M8 | EFG_ECOLI   | * P0A6M8 | P0ACY3 | efg_ecoli   | yeag_ecoli  |
| P0A6M8 | EFG_ECOLI   | * P0A6M8 | P39263 | efg_ecoli   | yfcc_ecoli  |
| P0A6M8 | EFG_ECOLI   | * P0A6M8 | O32528 | efg_ecoli   | ypdi_ecoli  |
| P0A6N4 | EFP_ECOLI   | none     |        |             |             |
| P0A6N8 | EFPL_ECOLI  | none     |        |             |             |
| P0A6P1 | EFTS_ECOLI  | * P0A6P1 | P36560 | efts_ecoli  | asr_ecoli   |
| P0A6P1 | EFTS_ECOLI  | * P0A6P1 | P0AEF0 | efts_ecoli  | dnac_ecoli  |
| P0A6P1 | EFTS_ECOLI  | * P0A6P1 | P33128 | efts_ecoli  | ecpd_ecoli  |
| P0A6P1 | EFTS_ECOLI  | * P0A6P1 | P0CE47 | efts_ecoli  | eftu1_ecoli |
| P0A6P1 | EFTS_ECOLI  | * P0A6P1 | P0CE47 | efts_ecoli  | eftu1_ecoli |
| P0A6P1 | EFTS_ECOLI  | * P0A6P1 | P0CE47 | efts_ecoli  | eftu1_ecoli |
| P0A6P1 | EFTS_ECOLI  | * P0A6P1 | P0CE47 | efts_ecoli  | eftu1_ecoli |
| P0A6P1 | EFTS_ECOLI  | * P0A6P1 | P0A7W1 | efts_ecoli  | rs5_ecoli   |
| P0A6P1 | EFTS_ECOLI  | * P0A6P1 | P08957 | efts_ecoli  | t1mk_ecoli  |
| P0CE47 | EFTU1_ECOLI | * P0CE47 | P24181 | eftu1_ecoli | acrf_ecoli  |
| P0CE47 | EFTU1_ECOLI | * P0CE47 | P08622 | eftu1_ecoli | dnaj_ecoli  |
| P0CE47 | EFTU1_ECOLI | * P0CE47 | P0A6Y8 | eftu1_ecoli | dnak_ecoli  |
| P0CE47 | EFTU1_ECOLI | * P0CE47 | P0A6P1 | eftu1_ecoli | efts_ecoli  |
| P0CE47 | EFTU1_ECOLI | * P0CE47 | P0A6P1 | eftu1_ecoli | efts_ecoli  |
| P0CE47 | EFTU1_ECOLI | * P0CE47 | P0A6P1 | eftu1_ecoli | efts_ecoli  |
| P0CE47 | EFTU1_ECOLI | * P0CE47 | P0A6P1 | eftu1_ecoli | efts_ecoli  |
| P0CE47 | EFTU1_ECOLI | * P0CE47 | P37009 | eftu1_ecoli | fbpc_ecoli  |

|        |             |      |        |        |             |            |
|--------|-------------|------|--------|--------|-------------|------------|
| POCE47 | EFTU1_ECOLI | *    | POCE47 | P0A817 | eftu1_ecoli | metk_ecoli |
| POCE47 | EFTU1_ECOLI | *    | POCE47 | P0A9X4 | eftu1_ecoli | mreb_ecoli |
| POCE47 | EFTU1_ECOLI | *    | POCE47 | P10408 | eftu1_ecoli | seca_ecoli |
| POCE47 | EFTU1_ECOLI | *    | POCE47 | P10408 | eftu1_ecoli | seca_ecoli |
| POCE47 | EFTU1_ECOLI | *    | POCE47 | P07118 | eftu1_ecoli | syv_ecoli  |
| POCE47 | EFTU1_ECOLI | *    | POCE47 | P39177 | eftu1_ecoli | uspg_ecoli |
| POCE47 | EFTU1_ECOLI | *    | POCE47 | P00944 | eftu1_ecoli | xyla_ecoli |
| POCE47 | EFTU1_ECOLI | *    | POCE47 | P0A8I3 | eftu1_ecoli | yaaa_ecoli |
| POCE47 | EFTU1_ECOLI | *    | POCE47 | P0A8J4 | eftu1_ecoli | ybed_ecoli |
| POCE47 | EFTU1_ECOLI | *    | POCE47 | P77552 | eftu1_ecoli | ydhq_ecoli |
| POCE48 | EFTU2_ECOLI | none |        |        |             |            |
| POAEH5 | ELAB_ECOLI  | *    | POAEH5 | P0A6X3 | elab_ecoli  | hfq_ecoli  |
| POAEH5 | ELAB_ECOLI  | *    | POAEH5 | P60422 | elab_ecoli  | rl2_ecoli  |
| POAEH5 | ELAB_ECOLI  | *    | POAEH5 | P0A7L3 | elab_ecoli  | rl20_ecoli |
| POAEH5 | ELAB_ECOLI  | *    | POAEH5 | P21338 | elab_ecoli  | rni_ecoli  |
| POAEH5 | ELAB_ECOLI  | *    | POAEH5 | P0A7V8 | elab_ecoli  | rs4_ecoli  |
| P25736 | END1_ECOLI  | none |        |        |             |            |
| POA6P7 | ENGB_ECOLI  | none |        |        |             |            |
| POABU2 | ENGD_ECOLI  | *    | POABU2 | P00963 | engd_ecoli  | asna_ecoli |
| POABU2 | ENGD_ECOLI  | *    | POABU2 | P0A6B7 | engd_ecoli  | iscs_ecoli |
| POABU2 | ENGD_ECOLI  | *    | POABU2 | P62620 | engd_ecoli  | ispg_ecoli |
| POABU2 | ENGD_ECOLI  | *    | POABU2 | P0ACP7 | engd_ecoli  | purr_ecoli |
| POABU2 | ENGD_ECOLI  | *    | POABU2 | P46850 | engd_ecoli  | rtcb_ecoli |
| POABU2 | ENGD_ECOLI  | *    | POABU2 | P0AG14 | engd_ecoli  | sohb_ecoli |
| POA6P9 | ENO_ECOLI   | *    | POA6P9 | P00888 | eno_ecoli   | arof_ecoli |
| POA6P9 | ENO_ECOLI   | *    | POA6P9 | P0A6Y8 | eno_ecoli   | dnak_ecoli |
| POA6P9 | ENO_ECOLI   | *    | POA6P9 | P0A6Y8 | eno_ecoli   | dnak_ecoli |
| POA6P9 | ENO_ECOLI   | *    | POA6P9 | P0A6Q6 | eno_ecoli   | fabz_ecoli |
| POA6P9 | ENO_ECOLI   | *    | POA6P9 | P0A6F3 | eno_ecoli   | glpk_ecoli |
| POA6P9 | ENO_ECOLI   | *    | POA6P9 | P18843 | eno_ecoli   | nade_ecoli |
| POA6P9 | ENO_ECOLI   | *    | POA6P9 | P0A761 | eno_ecoli   | nane_ecoli |
| POA6P9 | ENO_ECOLI   | *    | POA6P9 | P0ADI0 | eno_ecoli   | pinr_ecoli |
| POA6P9 | ENO_ECOLI   | *    | POA6P9 | P05055 | eno_ecoli   | pnp_ecoli  |
| POA6P9 | ENO_ECOLI   | *    | POA6P9 | P05055 | eno_ecoli   | pnp_ecoli  |
| POA6P9 | ENO_ECOLI   | *    | POA6P9 | P76062 | eno_ecoli   | racr_ecoli |
| POA6P9 | ENO_ECOLI   | *    | POA6P9 | P36767 | eno_ecoli   | rdgc_ecoli |
| POA6P9 | ENO_ECOLI   | *    | POA6P9 | P0ADZ0 | eno_ecoli   | rl23_ecoli |
| POA6P9 | ENO_ECOLI   | *    | POA6P9 | P0A7R1 | eno_ecoli   | rl9_ecoli  |
| POA6P9 | ENO_ECOLI   | *    | POA6P9 | P21513 | eno_ecoli   | rne_ecoli  |

|        |             |      |        |        |                            |                             |
|--------|-------------|------|--------|--------|----------------------------|-----------------------------|
| P0A6P9 | ENO_ECOLI   | *    | P0A6P9 | P21513 | <a href="#">eno_ecoli</a>  | <a href="#">rne_ecoli</a>   |
| P0A6P9 | ENO_ECOLI   | *    | P0A6P9 | P21513 | <a href="#">eno_ecoli</a>  | <a href="#">rne_ecoli</a>   |
| P0A6P9 | ENO_ECOLI   | *    | P0A6P9 | P21513 | <a href="#">eno_ecoli</a>  | <a href="#">rne_ecoli</a>   |
| P0A6P9 | ENO_ECOLI   | *    | P0A6P9 | P0A7W1 | <a href="#">eno_ecoli</a>  | <a href="#">rs5_ecoli</a>   |
| P0A6P9 | ENO_ECOLI   | *    | P0A6P9 | P04805 | <a href="#">eno_ecoli</a>  | <a href="#">sye_ecoli</a>   |
| P0A6P9 | ENO_ECOLI   | *    | P0A6P9 | P77216 | <a href="#">eno_ecoli</a>  | <a href="#">ybdn_ecoli</a>  |
| P0A6P9 | ENO_ECOLI   | *    | P0A6P9 | P76536 | <a href="#">eno_ecoli</a>  | <a href="#">yfex_ecoli</a>  |
| P0A6P9 | ENO_ECOLI   | *    | P0A6P9 | P77247 | <a href="#">eno_ecoli</a>  | <a href="#">ynic_ecoli</a>  |
| P0A6P9 | ENO_ECOLI   | *    | P0A6P9 | Q47710 | <a href="#">eno_ecoli</a>  | <a href="#">yqjk_ecoli</a>  |
| P0ACT2 | ENVR_ECOLI  | *    | P0ACT2 | P76038 | <a href="#">envr_ecoli</a> | <a href="#">puud_ecoli</a>  |
| P76555 | EUTQ_ECOLI  | *    | P76555 | P0A6L0 | <a href="#">eutq_ecoli</a> | <a href="#">deoc_ecoli</a>  |
| P76555 | EUTQ_ECOLI  | *    | P76555 | P30147 | <a href="#">eutq_ecoli</a> | <a href="#">hyi_ecoli</a>   |
| P76555 | EUTQ_ECOLI  | *    | P76555 | P31678 | <a href="#">eutq_ecoli</a> | <a href="#">otsb_ecoli</a>  |
| P76555 | EUTQ_ECOLI  | *    | P76555 | P60723 | <a href="#">eutq_ecoli</a> | <a href="#">rl4_ecoli</a>   |
| P76555 | EUTQ_ECOLI  | *    | P76555 | P0A8I8 | <a href="#">eutq_ecoli</a> | <a href="#">rlmh_ecoli</a>  |
| P76555 | EUTQ_ECOLI  | *    | P76555 | P0A9K9 | <a href="#">eutq_ecoli</a> | <a href="#">slyd_ecoli</a>  |
| P0A993 | F16PA_ECOLI | none |        |        |                            |                             |
| P0A6Q3 | FABA_ECOLI  | *    | P0A6Q3 | P0ABD5 | <a href="#">faba_ecoli</a> | <a href="#">acca_ecoli</a>  |
| P0A6Q3 | FABA_ECOLI  | *    | P0A6Q3 | P00722 | <a href="#">faba_ecoli</a> | <a href="#">bgal_ecoli</a>  |
| P0A6Q3 | FABA_ECOLI  | *    | P0A6Q3 | P0ACF0 | <a href="#">faba_ecoli</a> | <a href="#">dbha_ecoli</a>  |
| P0A6Q3 | FABA_ECOLI  | *    | P0A6Q3 | P0A9P6 | <a href="#">faba_ecoli</a> | <a href="#">dead_ecoli</a>  |
| P0A6Q3 | FABA_ECOLI  | *    | P0A6Q3 | P0CE47 | <a href="#">faba_ecoli</a> | <a href="#">eftu1_ecoli</a> |
| P0A6Q3 | FABA_ECOLI  | *    | P0A6Q3 | P0A817 | <a href="#">faba_ecoli</a> | <a href="#">metk_ecoli</a>  |
| P0A6Q3 | FABA_ECOLI  | *    | P0A6Q3 | P0AFG6 | <a href="#">faba_ecoli</a> | <a href="#">odo2_ecoli</a>  |
| P0A6Q3 | FABA_ECOLI  | *    | P0A6Q3 | P0A7L0 | <a href="#">faba_ecoli</a> | <a href="#">rl1_ecoli</a>   |
| P0A6Q3 | FABA_ECOLI  | *    | P0A6Q3 | P0A7K6 | <a href="#">faba_ecoli</a> | <a href="#">rl19_ecoli</a>  |
| P0A6Q3 | FABA_ECOLI  | *    | P0A6Q3 | P60422 | <a href="#">faba_ecoli</a> | <a href="#">rl2_ecoli</a>   |
| P0A6Q3 | FABA_ECOLI  | *    | P0A6Q3 | P0A8V2 | <a href="#">faba_ecoli</a> | <a href="#">rpob_ecoli</a>  |
| P0A6Q3 | FABA_ECOLI  | *    | P0A6Q3 | P0A8T7 | <a href="#">faba_ecoli</a> | <a href="#">rpoc_ecoli</a>  |
| P0A6Q3 | FABA_ECOLI  | *    | P0A6Q3 | P0AG67 | <a href="#">faba_ecoli</a> | <a href="#">rs1_ecoli</a>   |
| P0A6Q3 | FABA_ECOLI  | *    | P0A6Q3 | P0A7S9 | <a href="#">faba_ecoli</a> | <a href="#">rs13_ecoli</a>  |
| P0A6Q3 | FABA_ECOLI  | *    | P0A6Q3 | P0A7T7 | <a href="#">faba_ecoli</a> | <a href="#">rs18_ecoli</a>  |
| P0A6Q3 | FABA_ECOLI  | *    | P0A6Q3 | P0A7V0 | <a href="#">faba_ecoli</a> | <a href="#">rs2_ecoli</a>   |
| P0A6Q3 | FABA_ECOLI  | *    | P0A6Q3 | P0A7W1 | <a href="#">faba_ecoli</a> | <a href="#">rs5_ecoli</a>   |
| P0A6Q3 | FABA_ECOLI  | *    | P0A6Q3 | P02359 | <a href="#">faba_ecoli</a> | <a href="#">rs7_ecoli</a>   |
| P0A6Q3 | FABA_ECOLI  | *    | P0A6Q3 | P0A7X3 | <a href="#">faba_ecoli</a> | <a href="#">rs9_ecoli</a>   |
| P0A6Q3 | FABA_ECOLI  | *    | P0A6Q3 | P0AGD7 | <a href="#">faba_ecoli</a> | <a href="#">srp54_ecoli</a> |
| P0A6Q3 | FABA_ECOLI  | *    | P0A6Q3 | P04968 | <a href="#">faba_ecoli</a> | <a href="#">thd1_ecoli</a>  |
| P0A6Q3 | FABA_ECOLI  | *    | P0A6Q3 | P0A850 | <a href="#">faba_ecoli</a> | <a href="#">tig_ecoli</a>   |
| P0A6Q3 | FABA_ECOLI  | *    | P0A6Q3 | P76214 | <a href="#">faba_ecoli</a> | <a href="#">ves_ecoli</a>   |
| P0A6Q3 | FABA_ECOLI  | *    | P0A6Q3 | P28915 | <a href="#">faba_ecoli</a> | <a href="#">ybfc_ecoli</a>  |

|        |            |      |        |        |            |             |
|--------|------------|------|--------|--------|------------|-------------|
| POA6Q3 | FABA_ECOLI | *    | POA6Q3 | P76515 | faba_ecoli | yfds_ecoli  |
| POA6Q3 | FABA_ECOLI | *    | POA6Q3 | P65807 | faba_ecoli | ygey_ecoli  |
| POA953 | FABB_ECOLI | *    | POA953 | P0AB93 | fabb_ecoli | arsb_ecoli  |
| POA953 | FABB_ECOLI | *    | POA953 | P31658 | fabb_ecoli | hcha_ecoli  |
| POA953 | FABB_ECOLI | *    | POA953 | P60422 | fabb_ecoli | rl2_ecoli   |
| POA953 | FABB_ECOLI | *    | POA953 | P75792 | fabb_ecoli | suph_ecoli  |
| POA953 | FABB_ECOLI | *    | POA953 | P75970 | fabb_ecoli | vxis_ecoli  |
| POA953 | FABB_ECOLI | *    | POA953 | P0AD53 | fabb_ecoli | ygac_ecoli  |
| POA953 | FABB_ECOLI | *    | POA953 | P0A9V5 | fabb_ecoli | yiag_ecoli  |
| POAAI9 | FABD_ECOLI | *    | POAAI9 | P18843 | fabd_ecoli | nade_ecoli  |
| POAAI9 | FABD_ECOLI | *    | POAAI9 | P25906 | fabd_ecoli | ydbc_ecoli  |
| POAAI5 | FABF_ECOLI | *    | POAAI5 | P0A6A8 | fabf_ecoli | acp_ecoli   |
| POAAI5 | FABF_ECOLI | *    | POAAI5 | P28248 | fabf_ecoli | dcd_ecoli   |
| POAAI5 | FABF_ECOLI | *    | POAAI5 | P0A6Y8 | fabf_ecoli | dnak_ecoli  |
| POAAI5 | FABF_ECOLI | *    | POAAI5 | P0A6Y8 | fabf_ecoli | dnak_ecoli  |
| POAAI5 | FABF_ECOLI | *    | POAAI5 | P0AAL3 | fabf_ecoli | napg_ecoli  |
| POAEK2 | FABG_ECOLI | *    | POAEK2 | P17411 | fabg_ecoli | chbf_ecoli  |
| POAEK2 | FABG_ECOLI | *    | POAEK2 | P21693 | fabg_ecoli | dbpa_ecoli  |
| POAEK2 | FABG_ECOLI | *    | POAEK2 | P13035 | fabg_ecoli | glpd_ecoli  |
| POAEK2 | FABG_ECOLI | *    | POAEK2 | P31473 | fabg_ecoli | rava_ecoli  |
| POA6R0 | FABH_ECOLI | *    | POA6R0 | P06961 | fabh_ecoli | cca_ecoli   |
| POA6R0 | FABH_ECOLI | *    | POA6R0 | P37326 | fabh_ecoli | ints_ecoli  |
| POA6R0 | FABH_ECOLI | *    | POA6R0 | P18843 | fabh_ecoli | nade_ecoli  |
| POAEK4 | FABI_ECOLI | *    | POAEK4 | P0A988 | fabi_ecoli | dpo3b_ecoli |
| POAEK4 | FABI_ECOLI | *    | POAEK4 | P0AG30 | fabi_ecoli | rho_ecoli   |
| POAEK4 | FABI_ECOLI | *    | POAEK4 | P0A7J3 | fabi_ecoli | rl10_ecoli  |
| POAEK4 | FABI_ECOLI | *    | POAEK4 | P75864 | fabi_ecoli | rlml_ecoli  |
| POAEK4 | FABI_ECOLI | *    | POAEK4 | P0AG67 | fabi_ecoli | rs1_ecoli   |
| POAEK4 | FABI_ECOLI | *    | POAEK4 | P0A7R5 | fabi_ecoli | rs10_ecoli  |
| POAEK4 | FABI_ECOLI | *    | POAEK4 | P76573 | fabi_ecoli | yfgi_ecoli  |
| POAEK4 | FABI_ECOLI | *    | POAEK4 | P0AF90 | fabi_ecoli | yjgd_ecoli  |
| POACU5 | FABR_ECOLI | none |        |        |            |             |
| POA6Q6 | FABZ_ECOLI | *    | POA6Q6 | P0ABH9 | fabz_ecoli | clpa_ecoli  |
| POA6Q6 | FABZ_ECOLI | *    | POA6Q6 | P0CE47 | fabz_ecoli | eftu1_ecoli |
| POA6Q6 | FABZ_ECOLI | *    | POA6Q6 | P75882 | fabz_ecoli | gfcd_ecoli  |
| POA6Q6 | FABZ_ECOLI | *    | POA6Q6 | P0A9M0 | fabz_ecoli | lon_ecoli   |
| POA6Q6 | FABZ_ECOLI | *    | POA6Q6 | P0A7L0 | fabz_ecoli | rl1_ecoli   |

|        |            |   |        |        |            |             |
|--------|------------|---|--------|--------|------------|-------------|
| P0A6Q6 | FABZ_ECOLI | * | P0A6Q6 | P0A7J3 | fabz_ecoli | rl10_ecoli  |
| P0A6Q6 | FABZ_ECOLI | * | P0A6Q6 | P0AA10 | fabz_ecoli | rl13_ecoli  |
| P0A6Q6 | FABZ_ECOLI | * | P0A6Q6 | P0A7K6 | fabz_ecoli | rl19_ecoli  |
| P0A6Q6 | FABZ_ECOLI | * | P0A6Q6 | P60422 | fabz_ecoli | rl2_ecoli   |
| P0A6Q6 | FABZ_ECOLI | * | P0A6Q6 | P61175 | fabz_ecoli | rl22_ecoli  |
| P0A6Q6 | FABZ_ECOLI | * | P0A6Q6 | P60438 | fabz_ecoli | rl3_ecoli   |
| P0A6Q6 | FABZ_ECOLI | * | P0A6Q6 | P60723 | fabz_ecoli | rl4_ecoli   |
| P0A6Q6 | FABZ_ECOLI | * | P0A6Q6 | P62399 | fabz_ecoli | rl5_ecoli   |
| P0A6Q6 | FABZ_ECOLI | * | P0A6Q6 | P0AG55 | fabz_ecoli | rl6_ecoli   |
| P0A6Q6 | FABZ_ECOLI | * | P0A6Q6 | P0A7R1 | fabz_ecoli | rl9_ecoli   |
| P0A6Q6 | FABZ_ECOLI | * | P0A6Q6 | P0AG67 | fabz_ecoli | rs1_ecoli   |
| P0A6Q6 | FABZ_ECOLI | * | P0A6Q6 | P0A7V0 | fabz_ecoli | rs2_ecoli   |
| P0A6Q6 | FABZ_ECOLI | * | P0A6Q6 | P0A7V3 | fabz_ecoli | rs3_ecoli   |
| P0A6Q6 | FABZ_ECOLI | * | P0A6Q6 | P0A7V8 | fabz_ecoli | rs4_ecoli   |
| P0A6Q6 | FABZ_ECOLI | * | P0A6Q6 | P0A7W1 | fabz_ecoli | rs5_ecoli   |
| P0A6Q6 | FABZ_ECOLI | * | P0A6Q6 | P02359 | fabz_ecoli | rs7_ecoli   |
| P0A6Q6 | FABZ_ECOLI | * | P0A6Q6 | P0AGD7 | fabz_ecoli | srp54_ecoli |
| P0A6Q6 | FABZ_ECOLI | * | P0A6Q6 | P00962 | fabz_ecoli | syq_ecoli   |
| P0A6Q6 | FABZ_ECOLI | * | P0A6Q6 | P16694 | fabz_ecoli | yjda_ecoli  |

|        |            |      |  |  |  |  |
|--------|------------|------|--|--|--|--|
| P25401 | FAEE_ECOLX | none |  |  |  |  |
|--------|------------|------|--|--|--|--|

|        |            |      |  |  |  |  |
|--------|------------|------|--|--|--|--|
| P23774 | FAPR_ECOLX | none |  |  |  |  |
|--------|------------|------|--|--|--|--|

|        |            |   |        |        |            |             |
|--------|------------|---|--------|--------|------------|-------------|
| P13024 | FDHE_ECOLI | * | P13024 | P61517 | fdhe_ecoli | can_ecoli   |
| P13024 | FDHE_ECOLI | * | P13024 | P76290 | fdhe_ecoli | cmoa_ecoli  |
| P13024 | FDHE_ECOLI | * | P13024 | P10443 | fdhe_ecoli | dpo3a_ecoli |
| P13024 | FDHE_ECOLI | * | P13024 | P32176 | fdhe_ecoli | fdog_ecoli  |
| P13024 | FDHE_ECOLI | * | P13024 | P0AER3 | fdhe_ecoli | gltj_ecoli  |
| P13024 | FDHE_ECOLI | * | P13024 | P63228 | fdhe_ecoli | gmhb_ecoli  |
| P13024 | FDHE_ECOLI | * | P13024 | P0AES4 | fdhe_ecoli | gyra_ecoli  |
| P13024 | FDHE_ECOLI | * | P13024 | P0ACV0 | fdhe_ecoli | htrb_ecoli  |
| P13024 | FDHE_ECOLI | * | P13024 | P45395 | fdhe_ecoli | kdsd_ecoli  |
| P13024 | FDHE_ECOLI | * | P13024 | P18843 | fdhe_ecoli | nade_ecoli  |
| P13024 | FDHE_ECOLI | * | P13024 | P0ADY3 | fdhe_ecoli | rl14_ecoli  |
| P13024 | FDHE_ECOLI | * | P13024 | P0AG44 | fdhe_ecoli | rl17_ecoli  |
| P13024 | FDHE_ECOLI | * | P13024 | P61175 | fdhe_ecoli | rl22_ecoli  |
| P13024 | FDHE_ECOLI | * | P13024 | P62399 | fdhe_ecoli | rl5_ecoli   |
| P13024 | FDHE_ECOLI | * | P13024 | P0AG55 | fdhe_ecoli | rl6_ecoli   |
| P13024 | FDHE_ECOLI | * | P13024 | P02359 | fdhe_ecoli | rs7_ecoli   |
| P13024 | FDHE_ECOLI | * | P13024 | P0A7X3 | fdhe_ecoli | rs9_ecoli   |
| P13024 | FDHE_ECOLI | * | P13024 | P0A9K9 | fdhe_ecoli | slyd_ecoli  |

|        |            |   |        |        |            |             |
|--------|------------|---|--------|--------|------------|-------------|
| P24183 | FDNG_ECOLI | * | P24183 | P10443 | fdng_ecoli | dpo3a_ecoli |
| P24183 | FDNG_ECOLI | * | P24183 | POCE47 | fdng_ecoli | eftu1_ecoli |

|        |             |   |        |        |            |             |
|--------|-------------|---|--------|--------|------------|-------------|
| P24183 | FDNG_ECOLI  | * | P24183 | P0CE47 | fdng_ecoli | eftu1_ecoli |
| P24183 | FDNG_ECOLI  | * | P24183 | P13024 | fdng_ecoli | fdhe_ecoli  |
| P24183 | FDNG_ECOLI  | * | P24183 | P13024 | fdng_ecoli | fdhe_ecoli  |
| P24183 | FDNG_ECOLI  | * | P24183 | P0AFG8 | fdng_ecoli | odp1_ecoli  |
| P24183 | FDNG_ECOLI  | * | P24183 | P0AFG8 | fdng_ecoli | odp1_ecoli  |
| P32176 | FDOG_ECOLI  | * | P32176 | P00936 | fdog_ecoli | cyaa_ecoli  |
| P32176 | FDOG_ECOLI  | * | P32176 | P00582 | fdog_ecoli | dpo1_ecoli  |
| P32176 | FDOG_ECOLI  | * | P32176 | P0AAJ5 | fdog_ecoli | fdoh_ecoli  |
| P32176 | FDOG_ECOLI  | * | P32176 | P18843 | fdog_ecoli | nade_ecoli  |
| P32176 | FDOG_ECOLI  | * | P32176 | P00956 | fdog_ecoli | syi_ecoli   |
| P15029 | FECD_ECOLI  |   | none   |        |            |             |
| P23877 | FEPG_ECOLI  |   | none   |        |            |             |
| P0A9R4 | FER_ECOLI   | * | P0A9R4 | P25524 | fer_ecoli  | coda_ecoli  |
| P0A9R4 | FER_ECOLI   | * | P0A9R4 | P0A6F3 | fer_ecoli  | glpk_ecoli  |
| P0A9R4 | FER_ECOLI   | * | P0A9R4 | P30128 | fer_ecoli  | greb_ecoli  |
| P0A9R4 | FER_ECOLI   | * | P0A9R4 | P0A6B7 | fer_ecoli  | iscs_ecoli  |
| P0A9R4 | FER_ECOLI   | * | P0A9R4 | P0ABL5 | fer_ecoli  | napc_ecoli  |
| P0A9R4 | FER_ECOLI   | * | P0A9R4 | P15288 | fer_ecoli  | pepd_ecoli  |
| P0A9R4 | FER_ECOLI   | * | P0A9R4 | P25888 | fer_ecoli  | rhle_ecoli  |
| P0A9R4 | FER_ECOLI   | * | P0A9R4 | P25397 | fer_ecoli  | tehb_ecoli  |
| Q47153 | FHIA_ECOLI  | * | Q47153 | P32662 | fhia_ecoli | gph_ecoli   |
| Q47153 | FHIA_ECOLI  | * | Q47153 | P0A8I5 | fhia_ecoli | trmb_ecoli  |
| P04128 | FIMA1_ECOLI |   | none   |        |            |             |
| P31697 | FIMC_ECOLI  | * | P31697 | P30130 | fimc_ecoli | fimd_ecoli  |
| P31697 | FIMC_ECOLI  | * | P31697 | P08189 | fimc_ecoli | fimf_ecoli  |
| P31697 | FIMC_ECOLI  | * | P31697 | P08189 | fimc_ecoli | fimf_ecoli  |
| P31697 | FIMC_ECOLI  | * | P31697 | P08189 | fimc_ecoli | fimf_ecoli  |
| P31697 | FIMC_ECOLI  | * | P31697 | P08190 | fimc_ecoli | fimg_ecoli  |
| P31697 | FIMC_ECOLI  | * | P31697 | P08190 | fimc_ecoli | fimg_ecoli  |
| P31697 | FIMC_ECOLI  | * | P31697 | P08190 | fimc_ecoli | fimg_ecoli  |
| P31697 | FIMC_ECOLI  | * | P31697 | P08191 | fimc_ecoli | fimh_ecoli  |
| P31697 | FIMC_ECOLI  | * | P31697 | P08191 | fimc_ecoli | fimh_ecoli  |
| P31697 | FIMC_ECOLI  | * | P31697 | P08191 | fimc_ecoli | fimh_ecoli  |
| P31697 | FIMC_ECOLI  | * | P31697 | P08191 | fimc_ecoli | fimh_ecoli  |
| P31697 | FIMC_ECOLI  | * | P31697 | P08191 | fimc_ecoli | fimh_ecoli  |
| P31697 | FIMC_ECOLI  | * | P31697 | P08191 | fimc_ecoli | fimh_ecoli  |
| P31697 | FIMC_ECOLI  | * | P31697 | P08191 | fimc_ecoli | fimh_ecoli  |
| P08189 | FIMF_ECOLI  |   | none   |        |            |             |



|        |            |          |        |                            |                            |
|--------|------------|----------|--------|----------------------------|----------------------------|
| P08190 | FIMG_ECOLI | none     |        |                            |                            |
| P08191 | FIMH_ECOLI | none     |        |                            |                            |
| P0A6R3 | FIS_ECOLI  | * P0A6R3 | P0ACF0 | <a href="#">fis_ecoli</a>  | <a href="#">dbha_ecoli</a> |
| P0A6R3 | FIS_ECOLI  | * P0A6R3 | P0A6Y8 | <a href="#">fis_ecoli</a>  | <a href="#">dnak_ecoli</a> |
| P0A6R3 | FIS_ECOLI  | * P0A6R3 | P0AA10 | <a href="#">fis_ecoli</a>  | <a href="#">rl13_ecoli</a> |
| P0A6R3 | FIS_ECOLI  | * P0A6R3 | P0A7K6 | <a href="#">fis_ecoli</a>  | <a href="#">rl19_ecoli</a> |
| P0A6R3 | FIS_ECOLI  | * P0A6R3 | P60422 | <a href="#">fis_ecoli</a>  | <a href="#">rl2_ecoli</a>  |
| P0A6R3 | FIS_ECOLI  | * P0A6R3 | P0A7L3 | <a href="#">fis_ecoli</a>  | <a href="#">rl20_ecoli</a> |
| P0A6R3 | FIS_ECOLI  | * P0A6R3 | P61175 | <a href="#">fis_ecoli</a>  | <a href="#">rl22_ecoli</a> |
| P0A6R3 | FIS_ECOLI  | * P0A6R3 | P0ADZ0 | <a href="#">fis_ecoli</a>  | <a href="#">rl23_ecoli</a> |
| P0A6R3 | FIS_ECOLI  | * P0A6R3 | P60438 | <a href="#">fis_ecoli</a>  | <a href="#">rl3_ecoli</a>  |
| P0A6R3 | FIS_ECOLI  | * P0A6R3 | P0A7N9 | <a href="#">fis_ecoli</a>  | <a href="#">rl33_ecoli</a> |
| P0A6R3 | FIS_ECOLI  | * P0A6R3 | P60723 | <a href="#">fis_ecoli</a>  | <a href="#">rl4_ecoli</a>  |
| P0A6R3 | FIS_ECOLI  | * P0A6R3 | P0A8T7 | <a href="#">fis_ecoli</a>  | <a href="#">rpoc_ecoli</a> |
| P0A6R3 | FIS_ECOLI  | * P0A6R3 | P0A7R5 | <a href="#">fis_ecoli</a>  | <a href="#">rs10_ecoli</a> |
| P0A6R3 | FIS_ECOLI  | * P0A6R3 | P0A7S9 | <a href="#">fis_ecoli</a>  | <a href="#">rs13_ecoli</a> |
| P0A6R3 | FIS_ECOLI  | * P0A6R3 | P0A7V0 | <a href="#">fis_ecoli</a>  | <a href="#">rs2_ecoli</a>  |
| P0A6R3 | FIS_ECOLI  | * P0A6R3 | P0A7V3 | <a href="#">fis_ecoli</a>  | <a href="#">rs3_ecoli</a>  |
| P0A6R3 | FIS_ECOLI  | * P0A6R3 | P0A7V8 | <a href="#">fis_ecoli</a>  | <a href="#">rs4_ecoli</a>  |
| P0A6R3 | FIS_ECOLI  | * P0A6R3 | P0A7W1 | <a href="#">fis_ecoli</a>  | <a href="#">rs5_ecoli</a>  |
| P0A6R3 | FIS_ECOLI  | * P0A6R3 | P30139 | <a href="#">fis_ecoli</a>  | <a href="#">thig_ecoli</a> |
| P0A6R3 | FIS_ECOLI  | * P0A6R3 | P75989 | <a href="#">fis_ecoli</a>  | <a href="#">ycge_ecoli</a> |
| P45523 | FKBA_ECOLI | * P45523 | P0A6F1 | <a href="#">fkba_ecoli</a> | <a href="#">cara_ecoli</a> |
| P45523 | FKBA_ECOLI | * P45523 | P10378 | <a href="#">fkba_ecoli</a> | <a href="#">ente_ecoli</a> |
| P45523 | FKBA_ECOLI | * P45523 | P04994 | <a href="#">fkba_ecoli</a> | <a href="#">ex7l_ecoli</a> |
| P45523 | FKBA_ECOLI | * P45523 | P10441 | <a href="#">fkba_ecoli</a> | <a href="#">lpxb_ecoli</a> |
| P45523 | FKBA_ECOLI | * P45523 | P77432 | <a href="#">fkba_ecoli</a> | <a href="#">lsrk_ecoli</a> |
| P45523 | FKBA_ECOLI | * P45523 | P0AEZ3 | <a href="#">fkba_ecoli</a> | <a href="#">mind_ecoli</a> |
| P45523 | FKBA_ECOLI | * P45523 | P0A7V8 | <a href="#">fkba_ecoli</a> | <a href="#">rs4_ecoli</a>  |
| P45523 | FKBA_ECOLI | * P45523 | P75869 | <a href="#">fkba_ecoli</a> | <a href="#">sxy_ecoli</a>  |
| P45523 | FKBA_ECOLI | * P45523 | P0A9W0 | <a href="#">fkba_ecoli</a> | <a href="#">ular_ecoli</a> |
| P45523 | FKBA_ECOLI | * P45523 | P77147 | <a href="#">fkba_ecoli</a> | <a href="#">ydht_ecoli</a> |
| P45523 | FKBA_ECOLI | * P45523 | P76440 | <a href="#">fkba_ecoli</a> | <a href="#">yeit_ecoli</a> |
| P45523 | FKBA_ECOLI | * P45523 | Q46927 | <a href="#">fkba_ecoli</a> | <a href="#">ygdI_ecoli</a> |
| P45523 | FKBA_ECOLI | * P45523 | P77396 | <a href="#">fkba_ecoli</a> | <a href="#">ypdc_ecoli</a> |
| P0A9L3 | FKBB_ECOLI | * P0A9L3 | P0ADI4 | <a href="#">fkbb_ecoli</a> | <a href="#">entb_ecoli</a> |
| P0A9L3 | FKBB_ECOLI | * P0A9L3 | P0AERO | <a href="#">fkbb_ecoli</a> | <a href="#">glpf_ecoli</a> |
| P0A9L3 | FKBB_ECOLI | * P0A9L3 | P0AAE2 | <a href="#">fkbb_ecoli</a> | <a href="#">proy_ecoli</a> |
| P0A9L3 | FKBB_ECOLI | * P0A9L3 | P0AFZ7 | <a href="#">fkbb_ecoli</a> | <a href="#">trkh_ecoli</a> |

|        |            |      |        |        |            |             |
|--------|------------|------|--------|--------|------------|-------------|
| P61949 | FLAV_ECOLI | *    | P61949 | P33224 | flav_ecoli | aidb_ecoli  |
| P61949 | FLAV_ECOLI | *    | P61949 | P0ABH9 | flav_ecoli | clpa_ecoli  |
| P61949 | FLAV_ECOLI | *    | P61949 | P0A988 | flav_ecoli | dpo3b_ecoli |
| P61949 | FLAV_ECOLI | *    | P61949 | P0A8V6 | flav_ecoli | fadr_ecoli  |
| P61949 | FLAV_ECOLI | *    | P61949 | P15038 | flav_ecoli | held_ecoli  |
| P61949 | FLAV_ECOLI | *    | P61949 | P0ACF8 | flav_ecoli | hns_ecoli   |
| P61949 | FLAV_ECOLI | *    | P61949 | P0A9P9 | flav_ecoli | idno_ecoli  |
| P61949 | FLAV_ECOLI | *    | P61949 | P62620 | flav_ecoli | ispg_ecoli  |
| P61949 | FLAV_ECOLI | *    | P61949 | P0A9M0 | flav_ecoli | lon_ecoli   |
| P61949 | FLAV_ECOLI | *    | P61949 | P0A772 | flav_ecoli | nrdr_ecoli  |
| P61949 | FLAV_ECOLI | *    | P61949 | P0A7J0 | flav_ecoli | ribb_ecoli  |
| P61949 | FLAV_ECOLI | *    | P61949 | P60422 | flav_ecoli | rl2_ecoli   |
| P61949 | FLAV_ECOLI | *    | P61949 | P61175 | flav_ecoli | rl22_ecoli  |
| P61949 | FLAV_ECOLI | *    | P61949 | P0A7M2 | flav_ecoli | rl28_ecoli  |
| P61949 | FLAV_ECOLI | *    | P61949 | P0A7V0 | flav_ecoli | rs2_ecoli   |
| P61949 | FLAV_ECOLI | *    | P61949 | P0A7W1 | flav_ecoli | rs5_ecoli   |
| P61949 | FLAV_ECOLI | *    | P61949 | P0AG24 | flav_ecoli | spot_ecoli  |
| P61949 | FLAV_ECOLI | *    | P61949 | P0AG03 | flav_ecoli | ubix_ecoli  |
| P75933 | FLGA_ECOLI | none |        |        |            |             |
| P04949 | FLIC_ECOLI | *    | P04949 | P12999 | flic_ecoli | bioc_ecoli  |
| P04949 | FLIC_ECOLI | *    | P04949 | P0A6Y8 | flic_ecoli | dnak_ecoli  |
| P04949 | FLIC_ECOLI | *    | P04949 | Q47153 | flic_ecoli | fhia_ecoli  |
| P04949 | FLIC_ECOLI | *    | P04949 | P18843 | flic_ecoli | nade_ecoli  |
| P04949 | FLIC_ECOLI | *    | P04949 | P21889 | flic_ecoli | syd_ecoli   |
| P04949 | FLIC_ECOLI | *    | P04949 | P16659 | flic_ecoli | syp_ecoli   |
| P15070 | FLIN_ECOLI | *    | P15070 | P06974 | flin_ecoli | flim_ecoli  |
| P15070 | FLIN_ECOLI | *    | P15070 | P06974 | flin_ecoli | flim_ecoli  |
| P15070 | FLIN_ECOLI | *    | P15070 | P15070 | flin_ecoli | flin_ecoli  |
| P0ABY2 | FLIT_ECOLI | *    | P0ABY2 | P07363 | flit_ecoli | chea_ecoli  |
| P0ABY2 | FLIT_ECOLI | *    | P0ABY2 | P0AEM4 | flit_ecoli | flgm_ecoli  |
| P0ABY2 | FLIT_ECOLI | *    | P0ABY2 | P0A8S9 | flit_ecoli | flhd_ecoli  |
| P0ABY2 | FLIT_ECOLI | *    | P0ABY2 | P24216 | flit_ecoli | flid_ecoli  |
| P0ABY2 | FLIT_ECOLI | *    | P0ABY2 | P26608 | flit_ecoli | flis_ecoli  |
| P0ABY2 | FLIT_ECOLI | *    | P0ABY2 | P0ABY2 | flit_ecoli | flit_ecoli  |
| P0ABY2 | FLIT_ECOLI | *    | P0ABY2 | P0AG07 | flit_ecoli | rpe_ecoli   |
| P0ABY2 | FLIT_ECOLI | *    | P0ABY2 | P39280 | flit_ecoli | yjek_ecoli  |
| P23882 | FMT_ECOLI  | *    | P23882 | P25741 | fmt_ecoli  | rfap_ecoli  |
| P23882 | FMT_ECOLI  | *    | P23882 | P0A7L0 | fmt_ecoli  | rl1_ecoli   |
| P23882 | FMT_ECOLI  | *    | P23882 | P0AG44 | fmt_ecoli  | rl17_ecoli  |
| P23882 | FMT_ECOLI  | *    | P23882 | P60723 | fmt_ecoli  | rl4_ecoli   |

|        |            |   |        |        |                            |                             |
|--------|------------|---|--------|--------|----------------------------|-----------------------------|
| P23882 | FMT_ECOLI  | * | P23882 | P0A7R1 | <a href="#">fmt_ecoli</a>  | <a href="#">rl9_ecoli</a>   |
| P23882 | FMT_ECOLI  | * | P23882 | P0A7S9 | <a href="#">fmt_ecoli</a>  | <a href="#">rs13_ecoli</a>  |
| P23882 | FMT_ECOLI  | * | P23882 | P0A7V8 | <a href="#">fmt_ecoli</a>  | <a href="#">rs4_ecoli</a>   |
| P23882 | FMT_ECOLI  | * | P23882 | P02359 | <a href="#">fmt_ecoli</a>  | <a href="#">rs7_ecoli</a>   |
| P23882 | FMT_ECOLI  | * | P23882 | P0A7X3 | <a href="#">fmt_ecoli</a>  | <a href="#">rs9_ecoli</a>   |
| P23882 | FMT_ECOLI  | * | P23882 | P76154 | <a href="#">fmt_ecoli</a>  | <a href="#">ydfk_ecoli</a>  |
| P23882 | FMT_ECOLI  | * | P23882 | P76073 | <a href="#">fmt_ecoli</a>  | <a href="#">ynae_ecoli</a>  |
| P0A9E5 | FNR_ECOLI  | * | P0A9E5 | P0A717 | <a href="#">fnr_ecoli</a>  | <a href="#">kprs_ecoli</a>  |
| P0A9E5 | FNR_ECOLI  | * | P0A9E5 | P77188 | <a href="#">fnr_ecoli</a>  | <a href="#">matc_ecoli</a>  |
| P0A9E5 | FNR_ECOLI  | * | P0A9E5 | P18843 | <a href="#">fnr_ecoli</a>  | <a href="#">nade_ecoli</a>  |
| P0A9E5 | FNR_ECOLI  | * | P0A9E5 | P0AFJ5 | <a href="#">fnr_ecoli</a>  | <a href="#">phob_ecoli</a>  |
| P0AC16 | FOLB_ECOLI | * | P0AC16 | P76122 | <a href="#">folb_ecoli</a> | <a href="#">yddj_ecoli</a>  |
| P0AC19 | FOLX_ECOLI | * | P0AC19 | P0A948 | <a href="#">folx_ecoli</a> | <a href="#">rimj_ecoli</a>  |
| P00363 | FRDA_ECOLI | * | P00363 | P68767 | <a href="#">frda_ecoli</a> | <a href="#">ampa_ecoli</a>  |
| P00363 | FRDA_ECOLI | * | P00363 | P23886 | <a href="#">frda_ecoli</a> | <a href="#">cydc_ecoli</a>  |
| P00363 | FRDA_ECOLI | * | P00363 | P0AC47 | <a href="#">frda_ecoli</a> | <a href="#">frdb_ecoli</a>  |
| P00363 | FRDA_ECOLI | * | P00363 | P0AC47 | <a href="#">frda_ecoli</a> | <a href="#">frdb_ecoli</a>  |
| P00363 | FRDA_ECOLI | * | P00363 | P0AC47 | <a href="#">frda_ecoli</a> | <a href="#">frdb_ecoli</a>  |
| P00363 | FRDA_ECOLI | * | P00363 | P0AC47 | <a href="#">frda_ecoli</a> | <a href="#">frdb_ecoli</a>  |
| P00363 | FRDA_ECOLI | * | P00363 | P0A8Q0 | <a href="#">frda_ecoli</a> | <a href="#">frdc_ecoli</a>  |
| P00363 | FRDA_ECOLI | * | P00363 | P0A8Q0 | <a href="#">frda_ecoli</a> | <a href="#">frdc_ecoli</a>  |
| P00363 | FRDA_ECOLI | * | P00363 | P0A8Q0 | <a href="#">frda_ecoli</a> | <a href="#">frdc_ecoli</a>  |
| P00363 | FRDA_ECOLI | * | P00363 | P0A8Q3 | <a href="#">frda_ecoli</a> | <a href="#">frdd_ecoli</a>  |
| P00363 | FRDA_ECOLI | * | P00363 | P0A8Q3 | <a href="#">frda_ecoli</a> | <a href="#">frdd_ecoli</a>  |
| P00363 | FRDA_ECOLI | * | P00363 | P0A8Q3 | <a href="#">frda_ecoli</a> | <a href="#">frdd_ecoli</a>  |
| P00363 | FRDA_ECOLI | * | P00363 | P0AFG9 | <a href="#">frda_ecoli</a> | <a href="#">odp1_eco57</a>  |
| P00363 | FRDA_ECOLI | * | P00363 | P0A915 | <a href="#">frda_ecoli</a> | <a href="#">ompw_ecoli</a>  |
| P00363 | FRDA_ECOLI | * | P00363 | P16916 | <a href="#">frda_ecoli</a> | <a href="#">rhsa_ecoli</a>  |
| P00363 | FRDA_ECOLI | * | P00363 | P37194 | <a href="#">frda_ecoli</a> | <a href="#">slp_ecoli</a>   |
| P00363 | FRDA_ECOLI | * | P00363 | P75818 | <a href="#">frda_ecoli</a> | <a href="#">ybjp_ecoli</a>  |
| P00363 | FRDA_ECOLI | * | P00363 | P76111 | <a href="#">frda_ecoli</a> | <a href="#">ydcz_ecoli</a>  |
| P00363 | FRDA_ECOLI | * | P00363 | P77804 | <a href="#">frda_ecoli</a> | <a href="#">ydga_ecoli</a>  |
| P00363 | FRDA_ECOLI | * | P00363 | P39385 | <a href="#">frda_ecoli</a> | <a href="#">yjjin_ecoli</a> |
| P0AC47 | FRDB_ECOLI | * | P0AC47 | P00363 | <a href="#">frdb_ecoli</a> | <a href="#">frda_ecoli</a>  |
| P0AEN1 | FRE_ECOLI  | * | P0AEN1 | P0AE08 | <a href="#">fre_ecoli</a>  | <a href="#">ahpc_ecoli</a>  |
| P0AEN1 | FRE_ECOLI  | * | P0AEN1 | P0ABB4 | <a href="#">fre_ecoli</a>  | <a href="#">atpb_ecoli</a>  |
| P0AEN1 | FRE_ECOLI  | * | P0AEN1 | P37326 | <a href="#">fre_ecoli</a>  | <a href="#">ints_ecoli</a>  |
| P0AEN1 | FRE_ECOLI  | * | P0AEN1 | P18843 | <a href="#">fre_ecoli</a>  | <a href="#">nade_ecoli</a>  |
| P0AEN1 | FRE_ECOLI  | * | P0AEN1 | P37906 | <a href="#">fre_ecoli</a>  | <a href="#">puub_ecoli</a>  |

|        |            |   |        |        |            |             |
|--------|------------|---|--------|--------|------------|-------------|
| POAEN1 | FRE_ECOLI  | * | POAEN1 | P0AG30 | fre_ecoli  | rho_ecoli   |
| POAEN1 | FRE_ECOLI  | * | POAEN1 | P0AG55 | fre_ecoli  | rl6_ecoli   |
| P45544 | FRLR_ECOLI | * | P45544 | P14294 | frlr_ecoli | top3_ecoli  |
| P25437 | FRMA_ECOLI | * | P25437 | P13035 | frma_ecoli | glpd_ecoli  |
| P25437 | FRMA_ECOLI | * | P25437 | P25888 | frma_ecoli | rhle_ecoli  |
| P25437 | FRMA_ECOLI | * | P25437 | P39389 | frma_ecoli | yjir_ecoli  |
| POAAP3 | FRMR_ECOLI | * | POAAP3 | P13035 | frmr_ecoli | glpd_ecoli  |
| POAAP3 | FRMR_ECOLI | * | POAAP3 | P69441 | frmr_ecoli | kad_ecoli   |
| P32669 | FSAB_ECOLI |   |        |        |            |             |
|        |            |   | none   |        |            |             |
| P06136 | FTSQ_ECOLI | * | P06136 | P0ABH0 | ftsq_ecoli | ftsa_ecoli  |
| P06136 | FTSQ_ECOLI | * | P06136 | P0A6S5 | ftsq_ecoli | ftsb_ecoli  |
| P06136 | FTSQ_ECOLI | * | P06136 | P0AD68 | ftsq_ecoli | ftsi_ecoli  |
| P06136 | FTSQ_ECOLI | * | P06136 | P0AEN4 | ftsq_ecoli | ftsl_ecoli  |
| P06136 | FTSQ_ECOLI | * | P06136 | P06136 | ftsq_ecoli | ftsq_ecoli  |
| P0AC30 | FTSX_ECOLI | * | P0AC30 | P0ABH0 | ftsx_ecoli | ftsa_ecoli  |
| P0AC30 | FTSX_ECOLI | * | P0AC30 | P06136 | ftsx_ecoli | ftsq_ecoli  |
| P0AC30 | FTSX_ECOLI | * | P0AC30 | P06136 | ftsx_ecoli | ftsq_ecoli  |
| P0A9A6 | FTSZ_ECOLI | * | P0A9A6 | P22333 | ftsz_ecoli | add_ecoli   |
| P0A9A6 | FTSZ_ECOLI | * | P0A9A6 | P0A6Y8 | ftsz_ecoli | dnak_ecoli  |
| P0A9A6 | FTSZ_ECOLI | * | P0A9A6 | P0A6M8 | ftsz_ecoli | efg_ecoli   |
| P0A9A6 | FTSZ_ECOLI | * | P0A9A6 | P0CE47 | ftsz_ecoli | eftu1_ecoli |
| P0A9A6 | FTSZ_ECOLI | * | P0A9A6 | P0ABH0 | ftsz_ecoli | ftsa_ecoli  |
| P0A9A6 | FTSZ_ECOLI | * | P0A9A6 | P0A9R7 | ftsz_ecoli | ftse_ecoli  |
| P0A9A6 | FTSZ_ECOLI | * | P0A9A6 | P46889 | ftsz_ecoli | ftsk_ecoli  |
| P0A9A6 | FTSZ_ECOLI | * | P0A9A6 | P0C8J6 | ftsz_ecoli | gaty_ecoli  |
| P0A9A6 | FTSZ_ECOLI | * | P0A9A6 | P68187 | ftsz_ecoli | malk_ecoli  |
| P0A9A6 | FTSZ_ECOLI | * | P0A9A6 | P0A738 | ftsz_ecoli | moac_ecoli  |
| P0A9A6 | FTSZ_ECOLI | * | P0A9A6 | P0A9X4 | ftsz_ecoli | mreb_ecoli  |
| P0A9A6 | FTSZ_ECOLI | * | P0A9A6 | P09373 | ftsz_ecoli | pflb_ecoli  |
| P0A9A6 | FTSZ_ECOLI | * | P0A9A6 | P0AAH0 | ftsz_ecoli | pstb_ecoli  |
| P0A9A6 | FTSZ_ECOLI | * | P0A9A6 | P0A7G6 | ftsz_ecoli | reca_ecoli  |
| P0A9A6 | FTSZ_ECOLI | * | P0A9A6 | P0ADY3 | ftsz_ecoli | rl14_ecoli  |
| P0A9A6 | FTSZ_ECOLI | * | P0A9A6 | P62399 | ftsz_ecoli | rl5_ecoli   |
| P0A9A6 | FTSZ_ECOLI | * | P0A9A6 | P0A7R5 | ftsz_ecoli | rs10_ecoli  |
| P0A9A6 | FTSZ_ECOLI | * | P0A9A6 | P0A7V0 | ftsz_ecoli | rs2_ecoli   |
| P0A9A6 | FTSZ_ECOLI | * | P0A9A6 | P0A7V8 | ftsz_ecoli | rs4_ecoli   |
| P0A9A6 | FTSZ_ECOLI | * | P0A9A6 | P0A7W1 | ftsz_ecoli | rs5_ecoli   |
| P0A9A6 | FTSZ_ECOLI | * | P0A9A6 | P10408 | ftsz_ecoli | seca_ecoli  |

|        |            |   |        |        |            |            |
|--------|------------|---|--------|--------|------------|------------|
| POA9A6 | FTSZ_ECOLI | * | POA9A6 | P0AFZ5 | ftsz_ecoli | sula_ecoli |
| POA9A6 | FTSZ_ECOLI | * | POA9A6 | P0A843 | ftsz_ecoli | tate_ecoli |
| POA9A6 | FTSZ_ECOLI | * | POA9A6 | P39177 | ftsz_ecoli | uspg_ecoli |
| POA9A6 | FTSZ_ECOLI | * | POA9A6 | P31063 | ftsz_ecoli | yedd_ecoli |
| POA9A6 | FTSZ_ECOLI | * | POA9A6 | P77173 | ftsz_ecoli | zipa_ecoli |
| POAEN8 | FUCM_ECOLI | * | POAEN8 | P0A9P0 | fucm_ecoli | dldh_ecoli |
| POAEN8 | FUCM_ECOLI | * | POAEN8 | P0AA10 | fucm_ecoli | rl13_ecoli |
| POAEN8 | FUCM_ECOLI | * | POAEN8 | P61175 | fucm_ecoli | rl22_ecoli |
| POAEN8 | FUCM_ECOLI | * | POAEN8 | P0A7K2 | fucm_ecoli | rl7_ecoli  |
| POAC33 | FUMA_ECOLI | * | POAC33 | P14407 | fuma_ecoli | fumb_ecoli |
| POAC33 | FUMA_ECOLI | * | POAC33 | P18843 | fuma_ecoli | nade_ecoli |
| P14407 | FUMB_ECOLI | * | P14407 | P0AC33 | fumb_ecoli | fuma_ecoli |
| P14407 | FUMB_ECOLI | * | P14407 | P0AFG8 | fumb_ecoli | odp1_ecoli |
| POA9A9 | FUR_ECOLI  | * | POA9A9 | P18843 | fur_ecoli  | nade_ecoli |
| P37147 | FXSA_ECOLI | * | P37147 | P63284 | fxsa_ecoli | clpb_ecoli |
| P37147 | FXSA_ECOLI | * | P37147 | P0A6W5 | fxsa_ecoli | grea_ecoli |
| P37147 | FXSA_ECOLI | * | P37147 | P62399 | fxsa_ecoli | rl5_ecoli  |
| POA9B2 | G3P1_ECOLI | * | POA9B2 | P0AE88 | g3p1_ecoli | cpxr_ecoli |
| POA9B2 | G3P1_ECOLI | * | POA9B2 | P0A6Y8 | g3p1_ecoli | dnak_ecoli |
| POA9B2 | G3P1_ECOLI | * | POA9B2 | P0A6Y8 | g3p1_ecoli | dnak_ecoli |
| POA9B2 | G3P1_ECOLI | * | POA9B2 | P0C8J8 | g3p1_ecoli | gatz_ecoli |
| POA9B2 | G3P1_ECOLI | * | POA9B2 | P0A7Z4 | g3p1_ecoli | rpoa_ecoli |
| POA9B2 | G3P1_ECOLI | * | POA9B2 | P0A8V2 | g3p1_ecoli | rpob_ecoli |
| POA9B2 | G3P1_ECOLI | * | POA9B2 | P0A8T7 | g3p1_ecoli | rpoc_ecoli |
| POA9B2 | G3P1_ECOLI | * | POA9B2 | P00579 | g3p1_ecoli | rpod_ecoli |
| POA9B2 | G3P1_ECOLI | * | POA9B2 | P52125 | g3p1_ecoli | yfjj_ecoli |
| POAC53 | G6PD_ECOLI | * | POAC53 | P0A6Y8 | g6pd_ecoli | dnak_ecoli |
| POAC53 | G6PD_ECOLI | * | POAC53 | P0AFF6 | g6pd_ecoli | nusa_ecoli |
| POAC53 | G6PD_ECOLI | * | POAC53 | P15288 | g6pd_ecoli | pepd_ecoli |
| POAC53 | G6PD_ECOLI | * | POAC53 | P36938 | g6pd_ecoli | pgm_ecoli  |
| POA6T1 | G6PI_ECOLI |   | none   |        |            |            |
| P63235 | GADC_ECOLI |   | none   |        |            |            |
| P37639 | GADX_ECOLI | * | P37639 | P0A6F5 | gadx_ecoli | ch60_ecoli |
| P37639 | GADX_ECOLI | * | P37639 | P37014 | gadx_ecoli | yfad_ecoli |

|        |            |   |        |        |                            |                             |
|--------|------------|---|--------|--------|----------------------------|-----------------------------|
| P09147 | GALE_ECOLI | * | P09147 | P18843 | <a href="#">gale_ecoli</a> | <a href="#">nade_ecoli</a>  |
| P09147 | GALE_ECOLI | * | P09147 | P0AA43 | <a href="#">gale_ecoli</a> | <a href="#">rsua_ecoli</a>  |
| P09147 | GALE_ECOLI | * | P09147 | P77775 | <a href="#">gale_ecoli</a> | <a href="#">yfch_ecoli</a>  |
| P0AAB6 | GALF_ECOLI | * | P0AAB6 | P76205 | <a href="#">galf_ecoli</a> | <a href="#">arpb_ecoli</a>  |
| P0AAB6 | GALF_ECOLI | * | P0AAB6 | P0ABB4 | <a href="#">galf_ecoli</a> | <a href="#">atpb_ecoli</a>  |
| P0AAB6 | GALF_ECOLI | * | P0AAB6 | P06282 | <a href="#">galf_ecoli</a> | <a href="#">cdh_ecoli</a>   |
| P0AAB6 | GALF_ECOLI | * | P0AAB6 | P0A6F5 | <a href="#">galf_ecoli</a> | <a href="#">ch60_ecoli</a>  |
| P0AAB6 | GALF_ECOLI | * | P0AAB6 | P77463 | <a href="#">galf_ecoli</a> | <a href="#">ddpc_ecoli</a>  |
| P0AAB6 | GALF_ECOLI | * | P0AAB6 | P0ABT2 | <a href="#">galf_ecoli</a> | <a href="#">dps_ecoli</a>   |
| P0AAB6 | GALF_ECOLI | * | P0AAB6 | P0AEP3 | <a href="#">galf_ecoli</a> | <a href="#">galu_ecoli</a>  |
| P0AAB6 | GALF_ECOLI | * | P0AAB6 | P18843 | <a href="#">galf_ecoli</a> | <a href="#">nade_ecoli</a>  |
| P0A9C3 | GALM_ECOLI | * | P0A9C3 | P0A6Y8 | <a href="#">galm_ecoli</a> | <a href="#">dnak_ecoli</a>  |
| P0A9C3 | GALM_ECOLI | * | P0A9C3 | P62707 | <a href="#">galm_ecoli</a> | <a href="#">gpma_ecoli</a>  |
| P0A9C3 | GALM_ECOLI | * | P0A9C3 | P18843 | <a href="#">galm_ecoli</a> | <a href="#">nade_ecoli</a>  |
| P03024 | GALR_ECOLI |   | none   |        |                            |                             |
| P0AEP3 | GALU_ECOLI |   | none   |        |                            |                             |
| P0A9S3 | GATD_ECOLI | * | P0A9S3 | P69228 | <a href="#">gatd_ecoli</a> | <a href="#">baer_ecoli</a>  |
| P0A9S3 | GATD_ECOLI | * | P0A9S3 | P0AEC5 | <a href="#">gatd_ecoli</a> | <a href="#">bara_ecoli</a>  |
| P0A9S3 | GATD_ECOLI | * | P0A9S3 | P0A6F5 | <a href="#">gatd_ecoli</a> | <a href="#">ch60_ecoli</a>  |
| P0A9S3 | GATD_ECOLI | * | P0A9S3 | P0A6Y8 | <a href="#">gatd_ecoli</a> | <a href="#">dnak_ecoli</a>  |
| P0A9S3 | GATD_ECOLI | * | P0A9S3 | P13035 | <a href="#">gatd_ecoli</a> | <a href="#">glpd_ecoli</a>  |
| P0A9S3 | GATD_ECOLI | * | P0A9S3 | P22523 | <a href="#">gatd_ecoli</a> | <a href="#">mukb_ecoli</a>  |
| P0A9S3 | GATD_ECOLI | * | P0A9S3 | P18843 | <a href="#">gatd_ecoli</a> | <a href="#">nade_ecoli</a>  |
| P0A9S3 | GATD_ECOLI | * | P0A9S3 | P33602 | <a href="#">gatd_ecoli</a> | <a href="#">nuog_ecoli</a>  |
| P0A9S3 | GATD_ECOLI | * | P0A9S3 | P02918 | <a href="#">gatd_ecoli</a> | <a href="#">pbpa_ecoli</a>  |
| P0A9S3 | GATD_ECOLI | * | P0A9S3 | P60422 | <a href="#">gatd_ecoli</a> | <a href="#">rl2_ecoli</a>   |
| P0A9S3 | GATD_ECOLI | * | P0A9S3 | P0A7V0 | <a href="#">gatd_ecoli</a> | <a href="#">rs2_ecoli</a>   |
| P0A9S3 | GATD_ECOLI | * | P0A9S3 | P0A7V3 | <a href="#">gatd_ecoli</a> | <a href="#">rs3_ecoli</a>   |
| P0A9S3 | GATD_ECOLI | * | P0A9S3 | P0A7X3 | <a href="#">gatd_ecoli</a> | <a href="#">rs9_ecoli</a>   |
| P0A9S3 | GATD_ECOLI | * | P0A9S3 | P06612 | <a href="#">gatd_ecoli</a> | <a href="#">top1_ecoli</a>  |
| P0A9S3 | GATD_ECOLI | * | P0A9S3 | P76403 | <a href="#">gatd_ecoli</a> | <a href="#">yegq_ecoli</a>  |
| POC8J6 | GATY_ECOLI | * | POC8J6 | P0A6Y8 | <a href="#">gaty_ecoli</a> | <a href="#">dnak_ecoli</a>  |
| POC8J6 | GATY_ECOLI | * | POC8J6 | P0A6Y8 | <a href="#">gaty_ecoli</a> | <a href="#">dnak_ecoli</a>  |
| POC8J6 | GATY_ECOLI | * | POC8J6 | P0CE47 | <a href="#">gaty_ecoli</a> | <a href="#">eftu1_ecoli</a> |
| POC8J6 | GATY_ECOLI | * | POC8J6 | P0CE47 | <a href="#">gaty_ecoli</a> | <a href="#">eftu1_ecoli</a> |
| POC8J6 | GATY_ECOLI | * | POC8J6 | P06993 | <a href="#">gaty_ecoli</a> | <a href="#">malt_ecoli</a>  |
| POC8J6 | GATY_ECOLI | * | POC8J6 | P07649 | <a href="#">gaty_ecoli</a> | <a href="#">trua_ecoli</a>  |
| POC8J8 | GATZ_ECOLI | * | POC8J8 | P0A6F5 | <a href="#">gatz_ecoli</a> | <a href="#">ch60_ecoli</a>  |



|        |            |   |        |        |            |            |
|--------|------------|---|--------|--------|------------|------------|
| POC8J8 | GATZ_ECOLI | * | POC8J8 | P0A6T1 | gatz_ecoli | g6pi_ecoli |
| POC8J8 | GATZ_ECOLI | * | POC8J8 | POC8J6 | gatz_ecoli | gaty_ecoli |
| POC8J9 | GATZ_ECOLX |   | none   |        |            |            |
| P33195 | GCSP_ECOLI | * | P33195 | P77188 | gcsp_ecoli | matc_ecoli |
| P33195 | GCSP_ECOLI | * | P33195 | P18843 | gcsp_ecoli | nade_ecoli |
| P33195 | GCSP_ECOLI | * | P33195 | P76577 | gcsp_ecoli | pbpc_ecoli |
| P33195 | GCSP_ECOLI | * | P33195 | P37051 | gcsp_ecoli | puru_ecoli |
| P33195 | GCSP_ECOLI | * | P33195 | P0A7M9 | gcsp_ecoli | rl31_ecoli |
| P33195 | GCSP_ECOLI | * | P33195 | P0A8V2 | gcsp_ecoli | rpob_ecoli |
| P33195 | GCSP_ECOLI | * | P33195 | P10408 | gcsp_ecoli | seca_ecoli |
| P33195 | GCSP_ECOLI | * | P33195 | P76578 | gcsp_ecoli | yfhm_ecoli |
| P33195 | GCSP_ECOLI | * | P33195 | P0A894 | gcsp_ecoli | yhbj_ecoli |
| P27248 | GCST_ECOLI | * | P27248 | P45565 | gcst_ecoli | ais_ecoli  |
| P27248 | GCST_ECOLI | * | P27248 | Q46829 | gcst_ecoli | bgla_ecoli |
| P27248 | GCST_ECOLI | * | P27248 | P0AAJ3 | gcst_ecoli | fdnh_ecoli |
| P27248 | GCST_ECOLI | * | P27248 | P0AEK7 | gcst_ecoli | fdni_ecoli |
| P27248 | GCST_ECOLI | * | P27248 | P09373 | gcst_ecoli | pflb_ecoli |
| P27248 | GCST_ECOLI | * | P27248 | P76108 | gcst_ecoli | ydcx_ecoli |
| P75913 | GHRA_ECOLI |   | none   |        |            |            |
| P0A9S5 | GLDA_ECOLI |   | none   |        |            |            |
| P37747 | GLF_ECOLI  | * | P37747 | P0A6F5 | glf_ecoli  | ch60_ecoli |
| P37747 | GLF_ECOLI  | * | P37747 | P18843 | glf_ecoli  | nade_ecoli |
| P37747 | GLF_ECOLI  | * | P37747 | P16690 | glf_ecoli  | phnn_ecoli |
| P0A6V8 | GLK_ECOLI  | * | P0A6V8 | P18843 | glk_ecoli  | nade_ecoli |
| P0A6V8 | GLK_ECOLI  | * | P0A6V8 | P0A8I3 | glk_ecoli  | yaaa_ecoli |
| P0A6V8 | GLK_ECOLI  | * | P0A6V8 | P77721 | glk_ecoli  | ydjf_ecoli |
| P17169 | GLMS_ECOLI | * | P17169 | P08622 | glms_ecoli | dnaj_ecoli |
| P17169 | GLMS_ECOLI | * | P17169 | P76552 | glms_ecoli | euth_ecoli |
| P17169 | GLMS_ECOLI | * | P17169 | P61175 | glms_ecoli | rl22_ecoli |
| P17169 | GLMS_ECOLI | * | P17169 | P00957 | glms_ecoli | sya_ecoli  |
| P17169 | GLMS_ECOLI | * | P17169 | P0AFZ7 | glms_ecoli | trkh_ecoli |
| P17169 | GLMS_ECOLI | * | P17169 | P76093 | glms_ecoli | ynbd_ecoli |
| P17169 | GLMS_ECOLI | * | P17169 | P33366 | glms_ecoli | yohd_ecoli |
| P0A9C5 | GLNA_ECOLI | * | P0A9C5 | P0ADY7 | glna_ecoli | rl16_ecoli |
| P0A9C5 | GLNA_ECOLI | * | P0A9C5 | P0AG44 | glna_ecoli | rl17_ecoli |
| P0A9C5 | GLNA_ECOLI | * | P0A9C5 | P60422 | glna_ecoli | rl2_ecoli  |

|        |             |   |        |        |                             |                            |
|--------|-------------|---|--------|--------|-----------------------------|----------------------------|
| P0A9C5 | GLNA_ECOLI  | * | P0A9C5 | P0A7V3 | <a href="#">glna_ecoli</a>  | <a href="#">rs3_ecoli</a>  |
| P0A9C5 | GLNA_ECOLI  | * | P0A9C5 | P75989 | <a href="#">glna_ecoli</a>  | <a href="#">ycge_ecoli</a> |
| P27249 | GLND_ECOLI  | * | P27249 | P0A6F5 | <a href="#">glnd_ecoli</a>  | <a href="#">ch60_ecoli</a> |
| P27249 | GLND_ECOLI  | * | P27249 | P0AC55 | <a href="#">glnd_ecoli</a>  | <a href="#">glnk_ecoli</a> |
| P27249 | GLND_ECOLI  | * | P27249 | P13035 | <a href="#">glnd_ecoli</a>  | <a href="#">glpd_ecoli</a> |
| P27249 | GLND_ECOLI  | * | P27249 | P60785 | <a href="#">glnd_ecoli</a>  | <a href="#">lepa_ecoli</a> |
| P27249 | GLND_ECOLI  | * | P27249 | P22523 | <a href="#">glnd_ecoli</a>  | <a href="#">mukb_ecoli</a> |
| P27249 | GLND_ECOLI  | * | P27249 | P18843 | <a href="#">glnd_ecoli</a>  | <a href="#">nade_ecoli</a> |
| P27249 | GLND_ECOLI  | * | P27249 | P0ABL5 | <a href="#">glnd_ecoli</a>  | <a href="#">napc_ecoli</a> |
| P27249 | GLND_ECOLI  | * | P27249 | P0A7H0 | <a href="#">glnd_ecoli</a>  | <a href="#">recf_ecoli</a> |
| P27249 | GLND_ECOLI  | * | P27249 | P00957 | <a href="#">glnd_ecoli</a>  | <a href="#">sya_ecoli</a>  |
| P27249 | GLND_ECOLI  | * | P27249 | P06612 | <a href="#">glnd_ecoli</a>  | <a href="#">top1_ecoli</a> |
| P27249 | GLND_ECOLI  | * | P27249 | P39304 | <a href="#">glnd_ecoli</a>  | <a href="#">ulad_ecoli</a> |
| P27249 | GLND_ECOLI  | * | P27249 | P0ADE4 | <a href="#">glnd_ecoli</a>  | <a href="#">ytfm_ecoli</a> |
| P0AEQ3 | GLNH_ECOLI  | * | P0AEQ3 | P76104 | <a href="#">glnh_ecoli</a>  | <a href="#">ydcp_ecoli</a> |
| P0AEQ6 | GLNP_ECOLI  |   | none   |        |                             |                            |
| P13035 | GLPD_ECOLI  | * | P13035 | P0A6F5 | <a href="#">glpd_ecoli</a>  | <a href="#">ch60_ecoli</a> |
| P13035 | GLPD_ECOLI  | * | P13035 | P08622 | <a href="#">glpd_ecoli</a>  | <a href="#">dnaj_ecoli</a> |
| P13035 | GLPD_ECOLI  | * | P13035 | P06974 | <a href="#">glpd_ecoli</a>  | <a href="#">flim_ecoli</a> |
| P13035 | GLPD_ECOLI  | * | P13035 | P18843 | <a href="#">glpd_ecoli</a>  | <a href="#">nade_ecoli</a> |
| P13035 | GLPD_ECOLI  | * | P13035 | P0ACD4 | <a href="#">glpd_ecoli</a>  | <a href="#">nifu_ecoli</a> |
| P13035 | GLPD_ECOLI  | * | P13035 | P0A7J0 | <a href="#">glpd_ecoli</a>  | <a href="#">ribb_ecoli</a> |
| P13035 | GLPD_ECOLI  | * | P13035 | P60422 | <a href="#">glpd_ecoli</a>  | <a href="#">rl2_ecoli</a>  |
| P13035 | GLPD_ECOLI  | * | P13035 | P0A7V8 | <a href="#">glpd_ecoli</a>  | <a href="#">rs4_ecoli</a>  |
| P13035 | GLPD_ECOLI  | * | P13035 | P0A7W1 | <a href="#">glpd_ecoli</a>  | <a href="#">rs5_ecoli</a>  |
| P13035 | GLPD_ECOLI  | * | P13035 | P0A9K9 | <a href="#">glpd_ecoli</a>  | <a href="#">slyd_ecoli</a> |
| P13035 | GLPD_ECOLI  | * | P13035 | P39334 | <a href="#">glpd_ecoli</a>  | <a href="#">yjjg_ecoli</a> |
| P0A6F3 | GLPK_ECOLI  |   | none   |        |                             |                            |
| P0AC59 | GLRX2_ECOLI |   | none   |        |                             |                            |
| P0AC62 | GLRX3_ECOLI |   | none   |        |                             |                            |
| P0AC69 | GLRX4_ECOLI | * | P0AC69 | P0ABE2 | <a href="#">glrx4_ecoli</a> | <a href="#">bola_ecoli</a> |
| P0AC69 | GLRX4_ECOLI | * | P0AC69 | P69913 | <a href="#">glrx4_ecoli</a> | <a href="#">csra_ecoli</a> |
| P0AC69 | GLRX4_ECOLI | * | P0AC69 | P22255 | <a href="#">glrx4_ecoli</a> | <a href="#">cysq_ecoli</a> |
| P0AC69 | GLRX4_ECOLI | * | P0AC69 | P0A9A9 | <a href="#">glrx4_ecoli</a> | <a href="#">fur_ecoli</a>  |
| P0AC69 | GLRX4_ECOLI | * | P0AC69 | P0A9X4 | <a href="#">glrx4_ecoli</a> | <a href="#">mreb_ecoli</a> |
| P0AC69 | GLRX4_ECOLI | * | P0AC69 | P18843 | <a href="#">glrx4_ecoli</a> | <a href="#">nade_ecoli</a> |
| P0AC69 | GLRX4_ECOLI | * | P0AC69 | P0ABL5 | <a href="#">glrx4_ecoli</a> | <a href="#">napc_ecoli</a> |

|        |             |      |        |        |             |            |
|--------|-------------|------|--------|--------|-------------|------------|
| P0AC69 | GLRX4_ECOLI | *    | P0AC69 | P0A772 | glrx4_ecoli | nrld_ecoli |
| P0AC69 | GLRX4_ECOLI | *    | P0AC69 | P0AFD1 | glrx4_ecoli | nuoe_ecoli |
| P0AC69 | GLRX4_ECOLI | *    | P0AC69 | P16456 | glrx4_ecoli | seld_ecoli |
| P0AC69 | GLRX4_ECOLI | *    | P0AC69 | P0A9K9 | glrx4_ecoli | slyd_ecoli |
| P0AC69 | GLRX4_ECOLI | *    | P0AC69 | P64521 | glrx4_ecoli | yeet_ecoli |
| P77454 | GLSA1_ECOLI | *    | P77454 | P0AAI9 | glsa1_ecoli | fabd_ecoli |
| P77454 | GLSA1_ECOLI | *    | P77454 | P0A8Y5 | glsa1_ecoli | yida_ecoli |
| P09831 | GLTB_ECOLI  | none |        |        |             |            |
| P09832 | GLTD_ECOLI  | *    | P09832 | P09831 | glt_d_ecoli | gltb_ecoli |
| P09832 | GLTD_ECOLI  | *    | P09832 | P09831 | glt_d_ecoli | gltb_ecoli |
| P0A825 | GLYA_ECOLI  | *    | P0A825 | P75970 | glya_ecoli  | vxis_ecoli |
| P0A825 | GLYA_ECOLI  | *    | P0A825 | P0ACJ5 | glya_ecoli  | ybao_ecoli |
| P0A825 | GLYA_ECOLI  | *    | P0A825 | P64574 | glya_ecoli  | yghw_ecoli |
| P0A825 | GLYA_ECOLI  | *    | P0A825 | P75977 | glya_ecoli  | ymfm_ecoli |
| P63224 | GMHA_ECOLI  | none |        |        |             |            |
| P63228 | GMHB_ECOLI  | *    | P63228 | P0ABY2 | gmhb_ecoli  | flit_ecoli |
| P63228 | GMHB_ECOLI  | *    | P63228 | P60422 | gmhb_ecoli  | rl2_ecoli  |
| P63228 | GMHB_ECOLI  | *    | P63228 | P0ADZ4 | gmhb_ecoli  | rs15_ecoli |
| P63228 | GMHB_ECOLI  | *    | P63228 | P02358 | gmhb_ecoli  | rs6_ecoli  |
| P63228 | GMHB_ECOLI  | *    | P63228 | P32685 | gmhb_ecoli  | yjbd_ecoli |
| P0AC92 | GNSA_ECOLI  | *    | P0AC92 | P00722 | gnsa_ecoli  | bgal_ecoli |
| P0AC92 | GNSA_ECOLI  | *    | P0AC92 | P0A6B7 | gnsa_ecoli  | iscs_ecoli |
| P0AC92 | GNSA_ECOLI  | *    | P0AC92 | P0AEU7 | gnsa_ecoli  | skp_ecoli  |
| P0AC92 | GNSA_ECOLI  | *    | P0AC92 | P0A890 | gnsa_ecoli  | tusa_ecoli |
| P0AC92 | GNSA_ECOLI  | *    | P0AC92 | P0A8B5 | gnsa_ecoli  | ybab_ecoli |
| P77695 | GNSB_ECOLI  | none |        |        |             |            |
| P0ACP5 | GNTR_ECOLI  | none |        |        |             |            |
| P46846 | GNTX_ECOLI  | none |        |        |             |            |
| P0A6S7 | GPDA_ECOLI  | *    | P0A6S7 | P0AE08 | gpda_ecoli  | ahpc_ecoli |
| P0A6S7 | GPDA_ECOLI  | *    | P0A6S7 | P0A951 | gpda_ecoli  | atda_ecoli |
| P0A6S7 | GPDA_ECOLI  | *    | P0A6S7 | P0A9H3 | gpda_ecoli  | ldci_ecoli |
| P0A6S7 | GPDA_ECOLI  | *    | P0A6S7 | P18843 | gpda_ecoli  | nade_ecoli |
| P0A6S7 | GPDA_ECOLI  | *    | P0A6S7 | P0AG30 | gpda_ecoli  | rho_ecoli  |

|        |            |   |        |        |            |             |
|--------|------------|---|--------|--------|------------|-------------|
| P62707 | GPMA_ECOLI | * | P62707 | P0AB71 | gpma_ecoli | alf_ecoli   |
| P62707 | GPMA_ECOLI | * | P62707 | P0AB91 | gpma_ecoli | arog_ecoli  |
| P62707 | GPMA_ECOLI | * | P62707 | P25549 | gpma_ecoli | asla_ecoli  |
| P62707 | GPMA_ECOLI | * | P62707 | P37689 | gpma_ecoli | gpmi_ecoli  |
| P62707 | GPMA_ECOLI | * | P62707 | P04816 | gpma_ecoli | livk_ecoli  |
| P62707 | GPMA_ECOLI | * | P62707 | P50456 | gpma_ecoli | mhc_ecoli   |
| P62707 | GPMA_ECOLI | * | P62707 | P18843 | gpma_ecoli | nade_ecoli  |
| P62707 | GPMA_ECOLI | * | P62707 | P15288 | gpma_ecoli | pepd_ecoli  |
| P62707 | GPMA_ECOLI | * | P62707 | P0A7D7 | gpma_ecoli | pur7_ecoli  |
| P62707 | GPMA_ECOLI | * | P62707 | P0A7M2 | gpma_ecoli | rl28_ecoli  |
| P62707 | GPMA_ECOLI | * | P62707 | P0A8M3 | gpma_ecoli | syt_ecoli   |
| P0A7A2 | GPMB_ECOLI | * | P0A7A2 | P0AG71 | gpmb_ecoli | rmuc_ecoli  |
| P37689 | GPMI_ECOLI | * | P37689 | P0A9H3 | gpmi_ecoli | ldci_ecoli  |
| P37689 | GPMI_ECOLI | * | P37689 | P18843 | gpmi_ecoli | nade_ecoli  |
| P68066 | GRCA_ECOLI | * | P68066 | P77188 | grca_ecoli | matc_ecoli  |
| P68066 | GRCA_ECOLI | * | P68066 | P20083 | grca_ecoli | pare_ecoli  |
| P68066 | GRCA_ECOLI | * | P68066 | P09373 | grca_ecoli | pflb_ecoli  |
| P68066 | GRCA_ECOLI | * | P68066 | P09373 | grca_ecoli | pflb_ecoli  |
| P68066 | GRCA_ECOLI | * | P68066 | P09373 | grca_ecoli | pflb_ecoli  |
| P68066 | GRCA_ECOLI | * | P68066 | P60723 | grca_ecoli | rl4_ecoli   |
| P68066 | GRCA_ECOLI | * | P68066 | P0A7U7 | grca_ecoli | rs20_ecoli  |
| P68066 | GRCA_ECOLI | * | P68066 | P0A8N5 | grca_ecoli | syk2_ecoli  |
| P68066 | GRCA_ECOLI | * | P68066 | P42632 | grca_ecoli | tdce_ecoli  |
| P68066 | GRCA_ECOLI | * | P68066 | P0A858 | grca_ecoli | tpis_ecoli  |
| P68066 | GRCA_ECOLI | * | P68066 | P77402 | grca_ecoli | ydir_ecoli  |
| P0A6W5 | GREC_ECOLI | * | P0A6W5 | P0A9Q7 | grea_ecoli | adhe_ecoli  |
| P0A6W5 | GREC_ECOLI | * | P0A6W5 | P0ABB4 | grea_ecoli | atpb_ecoli  |
| P0A6W5 | GREC_ECOLI | * | P0A6W5 | P00968 | grea_ecoli | carb_ecoli  |
| P0A6W5 | GREC_ECOLI | * | P0A6W5 | P0A6H1 | grea_ecoli | clpx_ecoli  |
| P0A6W5 | GREC_ECOLI | * | P0A6W5 | P0A6Y8 | grea_ecoli | dnak_ecoli  |
| P0A6W5 | GREC_ECOLI | * | P0A6W5 | P0CE47 | grea_ecoli | eftu1_ecoli |
| P0A6W5 | GREC_ECOLI | * | P0A6W5 | P0A9B2 | grea_ecoli | g3p1_ecoli  |
| P0A6W5 | GREC_ECOLI | * | P0A6W5 | P0C8J8 | grea_ecoli | gatz_ecoli  |
| P0A6W5 | GREC_ECOLI | * | P0A6W5 | P0ADG7 | grea_ecoli | imd_h_ecoli |
| P0A6W5 | GREC_ECOLI | * | P0A6W5 | P0A717 | grea_ecoli | kprs_ecoli  |
| P0A6W5 | GREC_ECOLI | * | P0A6W5 | P25665 | grea_ecoli | mete_ecoli  |
| P0A6W5 | GREC_ECOLI | * | P0A6W5 | P18843 | grea_ecoli | nade_ecoli  |
| P0A6W5 | GREC_ECOLI | * | P0A6W5 | P0AFG8 | grea_ecoli | odp1_ecoli  |
| P0A6W5 | GREC_ECOLI | * | P0A6W5 | P08839 | grea_ecoli | pt1_ecoli   |
| P0A6W5 | GREC_ECOLI | * | P0A6W5 | P0AG30 | grea_ecoli | rho_ecoli   |
| P0A6W5 | GREC_ECOLI | * | P0A6W5 | P0A7J3 | grea_ecoli | rl10_ecoli  |

|        |             |   |        |        |            |            |
|--------|-------------|---|--------|--------|------------|------------|
| P0A6W5 | GRE_A_ECOLI | * | P0A6W5 | P0AA10 | grea_ecoli | rl13_ecoli |
| P0A6W5 | GRE_A_ECOLI | * | P0A6W5 | P60422 | grea_ecoli | rl2_ecoli  |
| P0A6W5 | GRE_A_ECOLI | * | P0A6W5 | P60723 | grea_ecoli | rl4_ecoli  |
| P0A6W5 | GRE_A_ECOLI | * | P0A6W5 | P62399 | grea_ecoli | rl5_ecoli  |
| P0A6W5 | GRE_A_ECOLI | * | P0A6W5 | P0A7Z4 | grea_ecoli | rpoa_ecoli |
| P0A6W5 | GRE_A_ECOLI | * | P0A6W5 | P0A8V2 | grea_ecoli | rpob_ecoli |
| P0A6W5 | GRE_A_ECOLI | * | P0A6W5 | P0A8T7 | grea_ecoli | rpoc_ecoli |
| P0A6W5 | GRE_A_ECOLI | * | P0A6W5 | P0A7R5 | grea_ecoli | rs10_ecoli |
| P0A6W5 | GRE_A_ECOLI | * | P0A6W5 | P0A7V0 | grea_ecoli | rs2_ecoli  |
| P0A6W5 | GRE_A_ECOLI | * | P0A6W5 | P0A7W1 | grea_ecoli | rs5_ecoli  |
| P0A6W5 | GRE_A_ECOLI | * | P0A6W5 | P02359 | grea_ecoli | rs7_ecoli  |
| P0A6W5 | GRE_A_ECOLI | * | P0A6W5 | P10408 | grea_ecoli | seca_ecoli |
| P0A6W5 | GRE_A_ECOLI | * | P0A6W5 | P0A8M3 | grea_ecoli | syt_ecoli  |
| P0A6W5 | GRE_A_ECOLI | * | P0A6W5 | P30177 | grea_ecoli | ybib_ecoli |
| P0A6W5 | GRE_A_ECOLI | * | P0A6W5 | P0ACY3 | grea_ecoli | yeag_ecoli |
| P0A6W5 | GRE_A_ECOLI | * | P0A6W5 | P0AGJ5 | grea_ecoli | yfif_ecoli |

|        |            |   |        |        |            |             |
|--------|------------|---|--------|--------|------------|-------------|
| P09372 | GRPE_ECOLI | * | P09372 | P0ABL8 | grpe_ecoli | ccmb_ecoli  |
| P09372 | GRPE_ECOLI | * | P09372 | P63284 | grpe_ecoli | clpb_ecoli  |
| P09372 | GRPE_ECOLI | * | P09372 | P69908 | grpe_ecoli | dcea_ecoli  |
| P09372 | GRPE_ECOLI | * | P09372 | P69910 | grpe_ecoli | dceb_ecoli  |
| P09372 | GRPE_ECOLI | * | P09372 | P0A6Y8 | grpe_ecoli | dnak_ecoli  |
| P09372 | GRPE_ECOLI | * | P09372 | P0A6Y8 | grpe_ecoli | dnak_ecoli  |
| P09372 | GRPE_ECOLI | * | P09372 | P0A6Y8 | grpe_ecoli | dnak_ecoli  |
| P09372 | GRPE_ECOLI | * | P09372 | P08555 | grpe_ecoli | dsdx_ecoli  |
| P09372 | GRPE_ECOLI | * | P09372 | P0CE47 | grpe_ecoli | eftu1_ecoli |
| P09372 | GRPE_ECOLI | * | P09372 | P52600 | grpe_ecoli | emry_ecoli  |
| P09372 | GRPE_ECOLI | * | P09372 | P0ADI4 | grpe_ecoli | entb_ecoli  |
| P09372 | GRPE_ECOLI | * | P09372 | P0ACZ4 | grpe_ecoli | evga_ecoli  |
| P09372 | GRPE_ECOLI | * | P09372 | P33235 | grpe_ecoli | flgk_ecoli  |
| P09372 | GRPE_ECOLI | * | P09372 | P0A9A9 | grpe_ecoli | fur_ecoli   |
| P09372 | GRPE_ECOLI | * | P09372 | P0A6W5 | grpe_ecoli | grea_ecoli  |
| P09372 | GRPE_ECOLI | * | P09372 | P0A9M0 | grpe_ecoli | lon_ecoli   |
| P09372 | GRPE_ECOLI | * | P09372 | P77188 | grpe_ecoli | matc_ecoli  |
| P09372 | GRPE_ECOLI | * | P09372 | P0A817 | grpe_ecoli | metk_ecoli  |
| P09372 | GRPE_ECOLI | * | P09372 | P0A769 | grpe_ecoli | mnth_ecoli  |
| P09372 | GRPE_ECOLI | * | P09372 | P18843 | grpe_ecoli | nade_ecoli  |
| P09372 | GRPE_ECOLI | * | P09372 | P0AFG0 | grpe_ecoli | nusg_ecoli  |
| P09372 | GRPE_ECOLI | * | P09372 | P76078 | grpe_ecoli | paab_ecoli  |
| P09372 | GRPE_ECOLI | * | P09372 | P15288 | grpe_ecoli | pepd_ecoli  |
| P09372 | GRPE_ECOLI | * | P09372 | P16690 | grpe_ecoli | phnn_ecoli  |
| P09372 | GRPE_ECOLI | * | P09372 | P0AG30 | grpe_ecoli | rho_ecoli   |
| P09372 | GRPE_ECOLI | * | P09372 | P0A7J3 | grpe_ecoli | rl10_ecoli  |
| P09372 | GRPE_ECOLI | * | P09372 | P0ADY3 | grpe_ecoli | rl14_ecoli  |
| P09372 | GRPE_ECOLI | * | P09372 | P02413 | grpe_ecoli | rl15_ecoli  |

|        |            |      |        |        |            |             |
|--------|------------|------|--------|--------|------------|-------------|
| P09372 | GRPE_ECOLI | *    | P09372 | P0AG44 | grpe_ecoli | rl17_ecoli  |
| P09372 | GRPE_ECOLI | *    | P09372 | P0A7K6 | grpe_ecoli | rl19_ecoli  |
| P09372 | GRPE_ECOLI | *    | P09372 | P0A7K6 | grpe_ecoli | rl19_ecoli  |
| P09372 | GRPE_ECOLI | *    | P09372 | P0A7N9 | grpe_ecoli | rl33_ecoli  |
| P09372 | GRPE_ECOLI | *    | P09372 | P60723 | grpe_ecoli | rl4_ecoli   |
| P09372 | GRPE_ECOLI | *    | P09372 | P0A7K2 | grpe_ecoli | rl7_ecoli   |
| P09372 | GRPE_ECOLI | *    | P09372 | P0A7V0 | grpe_ecoli | rs2_ecoli   |
| P09372 | GRPE_ECOLI | *    | P09372 | P0A7W1 | grpe_ecoli | rs5_ecoli   |
| P09372 | GRPE_ECOLI | *    | P09372 | P02359 | grpe_ecoli | rs7_ecoli   |
| P09372 | GRPE_ECOLI | *    | P09372 | P0A7X3 | grpe_ecoli | rs9_ecoli   |
| P09372 | GRPE_ECOLI | *    | P09372 | P68191 | grpe_ecoli | sra_ecoli   |
| P09372 | GRPE_ECOLI | *    | P09372 | Q47538 | grpe_ecoli | taub_ecoli  |
| P09372 | GRPE_ECOLI | *    | P09372 | P30139 | grpe_ecoli | thig_ecoli  |
| P09372 | GRPE_ECOLI | *    | P09372 | P46923 | grpe_ecoli | torz_ecoli  |
| P09372 | GRPE_ECOLI | *    | P09372 | P0AG03 | grpe_ecoli | ubix_ecoli  |
| P09372 | GRPE_ECOLI | *    | P09372 | P77536 | grpe_ecoli | ykgf_ecoli  |
| P09372 | GRPE_ECOLI | *    | P09372 | P0ACS5 | grpe_ecoli | zntr_ecoli  |
| P23893 | GSA_ECOLI  | none |        |        |            |             |
| P0A6W9 | GSH1_ECOLI | *    | P0A6W9 | P40120 | gsh1_ecoli | opgd_ecoli  |
| P0A6W9 | GSH1_ECOLI | *    | P0A6W9 | P76104 | gsh1_ecoli | ydcp_ecoli  |
| P06715 | GSHR_ECOLI | *    | P06715 | P18843 | gshr_ecoli | nade_ecoli  |
| P45759 | GSPE_ECOLI | *    | P45759 | P60422 | gspe_ecoli | rl2_ecoli   |
| P0A9D2 | GST_ECOLI  | none |        |        |            |             |
| P04079 | GUAA_ECOLI | *    | P04079 | P18843 | guaa_ecoli | nade_ecoli  |
| P04079 | GUAA_ECOLI | *    | P04079 | P16690 | guaa_ecoli | phnn_ecoli  |
| POAES4 | GYRA_ECOLI | *    | POAES4 | P00509 | gyra_ecoli | aat_ecoli   |
| POAES4 | GYRA_ECOLI | *    | POAES4 | P22333 | gyra_ecoli | add_ecoli   |
| POAES4 | GYRA_ECOLI | *    | POAES4 | P0AE67 | gyra_ecoli | chey_ecoli  |
| POAES4 | GYRA_ECOLI | *    | POAES4 | P0ABH9 | gyra_ecoli | clpa_ecoli  |
| POAES4 | GYRA_ECOLI | *    | POAES4 | P0A9P0 | gyra_ecoli | dldh_ecoli  |
| POAES4 | GYRA_ECOLI | *    | POAES4 | P08622 | gyra_ecoli | dnaj_ecoli  |
| POAES4 | GYRA_ECOLI | *    | POAES4 | P0A6Y8 | gyra_ecoli | dnak_ecoli  |
| POAES4 | GYRA_ECOLI | *    | POAES4 | P0CE47 | gyra_ecoli | eftu1_ecoli |
| POAES4 | GYRA_ECOLI | *    | POAES4 | P0CE47 | gyra_ecoli | eftu1_ecoli |
| POAES4 | GYRA_ECOLI | *    | POAES4 | P0AEM4 | gyra_ecoli | flgm_ecoli  |
| POAES4 | GYRA_ECOLI | *    | POAES4 | P0ABZ1 | gyra_ecoli | flig_ecoli  |
| POAES4 | GYRA_ECOLI | *    | POAES4 | P0A9A6 | gyra_ecoli | fts_z_ecoli |
| POAES4 | GYRA_ECOLI | *    | POAES4 | P0AES4 | gyra_ecoli | gyra_ecoli  |



|        |            |   |        |        |            |              |
|--------|------------|---|--------|--------|------------|--------------|
| POAES4 | GYRA_ECOLI | * | POAES4 | POAES6 | gyra_ecoli | gyrb_ecoli   |
| POAES4 | GYRA_ECOLI | * | POAES4 | POAES6 | gyra_ecoli | gyrb_ecoli   |
| POAES4 | GYRA_ECOLI | * | POAES4 | P0A9P9 | gyra_ecoli | idno_ecoli   |
| POAES4 | GYRA_ECOLI | * | POAES4 | P68187 | gyra_ecoli | malk_ecoli   |
| POAES4 | GYRA_ECOLI | * | POAES4 | P0A817 | gyra_ecoli | metk_ecoli   |
| POAES4 | GYRA_ECOLI | * | POAES4 | P0A9X4 | gyra_ecoli | mreb_ecoli   |
| POAES4 | GYRA_ECOLI | * | POAES4 | P0A772 | gyra_ecoli | nrdi_ecoli   |
| POAES4 | GYRA_ECOLI | * | POAES4 | P06959 | gyra_ecoli | odp2_ecoli   |
| POAES4 | GYRA_ECOLI | * | POAES4 | P0AAH0 | gyra_ecoli | pstb_ecoli   |
| POAES4 | GYRA_ECOLI | * | POAES4 | Q9F557 | gyra_ecoli | q9f557_ecolx |
| POAES4 | GYRA_ECOLI | * | POAES4 | P0A7G6 | gyra_ecoli | reca_ecoli   |
| POAES4 | GYRA_ECOLI | * | POAES4 | P0AG30 | gyra_ecoli | rho_ecoli    |
| POAES4 | GYRA_ECOLI | * | POAES4 | P0A7L8 | gyra_ecoli | rl27_ecoli   |
| POAES4 | GYRA_ECOLI | * | POAES4 | P0A7U3 | gyra_ecoli | rs19_ecoli   |
| POAES4 | GYRA_ECOLI | * | POAES4 | P0A7V0 | gyra_ecoli | rs2_ecoli    |
| POAES4 | GYRA_ECOLI | * | POAES4 | P0A7V0 | gyra_ecoli | rs2_ecoli    |
| POAES4 | GYRA_ECOLI | * | POAES4 | P0A6U5 | gyra_ecoli | rsmg_ecoli   |
| POAES4 | GYRA_ECOLI | * | POAES4 | P46850 | gyra_ecoli | rtcb_ecoli   |
| POAES4 | GYRA_ECOLI | * | POAES4 | P0AGD7 | gyra_ecoli | srp54_ecoli  |
| POAES4 | GYRA_ECOLI | * | POAES4 | P00961 | gyra_ecoli | sygb_ecoli   |
| POAES4 | GYRA_ECOLI | * | POAES4 | P11875 | gyra_ecoli | syr_ecoli    |
| POAES4 | GYRA_ECOLI | * | POAES4 | P76464 | gyra_ecoli | yfas_ecoli   |
| POAES4 | GYRA_ECOLI | * | POAES4 | P39308 | gyra_ecoli | yjfz_ecoli   |
| POAES4 | GYRA_ECOLI | * | POAES4 | P14377 | gyra_ecoli | zras_ecoli   |
| POAES6 | GYRB_ECOLI | * | POAES6 | P39404 | gyrb_ecoli | bglj_ecoli   |
| POAES6 | GYRB_ECOLI | * | POAES6 | P0A9P6 | gyrb_ecoli | dead_ecoli   |
| POAES6 | GYRB_ECOLI | * | POAES6 | P0CE47 | gyrb_ecoli | eftu1_ecoli  |
| POAES6 | GYRB_ECOLI | * | POAES6 | P0CE47 | gyrb_ecoli | eftu1_ecoli  |
| POAES6 | GYRB_ECOLI | * | POAES6 | POAES4 | gyrb_ecoli | gyra_ecoli   |
| POAES6 | GYRB_ECOLI | * | POAES6 | POAES4 | gyrb_ecoli | gyra_ecoli   |
| POAES6 | GYRB_ECOLI | * | POAES6 | POAES4 | gyrb_ecoli | gyra_ecoli   |
| POAES6 | GYRB_ECOLI | * | POAES6 | P0A817 | gyrb_ecoli | metk_ecoli   |
| POAES6 | GYRB_ECOLI | * | POAES6 | P20083 | gyrb_ecoli | pare_ecoli   |
| POAES6 | GYRB_ECOLI | * | POAES6 | P42184 | gyrb_ecoli | prsa_ecolx   |
| POAES6 | GYRB_ECOLI | * | POAES6 | P0A7J3 | gyrb_ecoli | rl10_ecoli   |
| POAES6 | GYRB_ECOLI | * | POAES6 | P0ADZ0 | gyrb_ecoli | rl23_ecoli   |
| POAES6 | GYRB_ECOLI | * | POAES6 | P0A7V0 | gyrb_ecoli | rs2_ecoli    |
| POAES6 | GYRB_ECOLI | * | POAES6 | P00961 | gyrb_ecoli | sygb_ecoli   |
| POAES6 | GYRB_ECOLI | * | POAES6 | P0A8H8 | gyrb_ecoli | yacg_ecoli   |
| POAES6 | GYRB_ECOLI | * | POAES6 | P0A8H8 | gyrb_ecoli | yacg_ecoli   |
| P33012 | GYRI_ECOLI |   | none   |        |            |              |
| P31658 | HCHA_ECOLI | * | P31658 | P31680 | hcha_ecoli | djla_ecoli   |

|        |            |   |        |        |                            |                             |
|--------|------------|---|--------|--------|----------------------------|-----------------------------|
| P31658 | HCHA_ECOLI | * | P31658 | P18843 | <a href="#">hcha_ecoli</a> | <a href="#">nade_ecoli</a>  |
| P31658 | HCHA_ECOLI | * | P31658 | P0A853 | <a href="#">hcha_ecoli</a> | <a href="#">tnaa_ecoli</a>  |
| P75824 | HCR_ECOLI  |   |        |        |                            |                             |
| P0AES9 | HDEA_ECOLI |   |        |        |                            |                             |
| P0AET2 | HDEB_ECOLI |   |        |        |                            |                             |
| P0A8R9 | HDFR_ECOLI |   |        |        |                            |                             |
| P0AET8 | HDHA_ECOLI | * | P0AET8 | P0A6F5 | <a href="#">hdha_ecoli</a> | <a href="#">ch60_ecoli</a>  |
| P0AET8 | HDHA_ECOLI | * | P0AET8 | P0ADZ4 | <a href="#">hdha_ecoli</a> | <a href="#">rs15_ecoli</a>  |
| P0AET8 | HDHA_ECOLI | * | P0AET8 | P39177 | <a href="#">hdha_ecoli</a> | <a href="#">uspg_ecoli</a>  |
| P15038 | HELD_ECOLI | * | P15038 | P0ABB4 | <a href="#">held_ecoli</a> | <a href="#">atpb_ecoli</a>  |
| P15038 | HELD_ECOLI | * | P15038 | P0ABD8 | <a href="#">held_ecoli</a> | <a href="#">bccp_ecoli</a>  |
| P15038 | HELD_ECOLI | * | P15038 | P0A6F5 | <a href="#">held_ecoli</a> | <a href="#">ch60_ecoli</a>  |
| P15038 | HELD_ECOLI | * | P15038 | P0A6F5 | <a href="#">held_ecoli</a> | <a href="#">ch60_ecoli</a>  |
| P15038 | HELD_ECOLI | * | P15038 | P69913 | <a href="#">held_ecoli</a> | <a href="#">csra_ecoli</a>  |
| P15038 | HELD_ECOLI | * | P15038 | P69910 | <a href="#">held_ecoli</a> | <a href="#">dceb_ecoli</a>  |
| P15038 | HELD_ECOLI | * | P15038 | P0A6Y8 | <a href="#">held_ecoli</a> | <a href="#">dnak_ecoli</a>  |
| P15038 | HELD_ECOLI | * | P15038 | P0A6Y8 | <a href="#">held_ecoli</a> | <a href="#">dnak_ecoli</a>  |
| P15038 | HELD_ECOLI | * | P15038 | P0CE47 | <a href="#">held_ecoli</a> | <a href="#">eftu1_ecoli</a> |
| P15038 | HELD_ECOLI | * | P15038 | P0CE47 | <a href="#">held_ecoli</a> | <a href="#">eftu1_ecoli</a> |
| P15038 | HELD_ECOLI | * | P15038 | P0A9B2 | <a href="#">held_ecoli</a> | <a href="#">g3p1_ecoli</a>  |
| P15038 | HELD_ECOLI | * | P15038 | P33195 | <a href="#">held_ecoli</a> | <a href="#">gcsp_ecoli</a>  |
| P15038 | HELD_ECOLI | * | P15038 | P0A705 | <a href="#">held_ecoli</a> | <a href="#">if2_ecoli</a>   |
| P15038 | HELD_ECOLI | * | P15038 | P60716 | <a href="#">held_ecoli</a> | <a href="#">lipa_ecoli</a>  |
| P15038 | HELD_ECOLI | * | P15038 | P09373 | <a href="#">held_ecoli</a> | <a href="#">pflb_ecoli</a>  |
| P15038 | HELD_ECOLI | * | P15038 | P0A799 | <a href="#">held_ecoli</a> | <a href="#">pgk_ecoli</a>   |
| P15038 | HELD_ECOLI | * | P15038 | P08839 | <a href="#">held_ecoli</a> | <a href="#">pt1_ecoli</a>   |
| P15038 | HELD_ECOLI | * | P15038 | P0AG48 | <a href="#">held_ecoli</a> | <a href="#">rl21_ecoli</a>  |
| P15038 | HELD_ECOLI | * | P15038 | P60438 | <a href="#">held_ecoli</a> | <a href="#">rl3_ecoli</a>   |
| P15038 | HELD_ECOLI | * | P15038 | P60723 | <a href="#">held_ecoli</a> | <a href="#">rl4_ecoli</a>   |
| P15038 | HELD_ECOLI | * | P15038 | P0A7K2 | <a href="#">held_ecoli</a> | <a href="#">rl7_ecoli</a>   |
| P15038 | HELD_ECOLI | * | P15038 | P0AG67 | <a href="#">held_ecoli</a> | <a href="#">rs1_ecoli</a>   |
| P15038 | HELD_ECOLI | * | P15038 | P02359 | <a href="#">held_ecoli</a> | <a href="#">rs7_ecoli</a>   |
| P15038 | HELD_ECOLI | * | P15038 | P0A858 | <a href="#">held_ecoli</a> | <a href="#">tpis_ecoli</a>  |
| P0ACB2 | HEM2_ECOLI | * | P0ACB2 | P42593 | <a href="#">hem2_ecoli</a> | <a href="#">fadh_ecoli</a>  |
| P0ACB2 | HEM2_ECOLI | * | P0ACB2 | P0AEU0 | <a href="#">hem2_ecoli</a> | <a href="#">hisj_ecoli</a>  |
| P0ACB2 | HEM2_ECOLI | * | P0ACB2 | P0AFY2 | <a href="#">hem2_ecoli</a> | <a href="#">sana_ecoli</a>  |
| P0ABC3 | HFLC_ECOLI | * | P0ABC3 | P0ACE0 | <a href="#">hflc_ecoli</a> | <a href="#">mbhm_ecoli</a>  |

|        |            |   |        |        |            |             |
|--------|------------|---|--------|--------|------------|-------------|
| P0ABC3 | HFLC_ECOLI | * | P0ABC3 | P60422 | hflc_ecoli | rl2_ecoli   |
| P0ABC3 | HFLC_ECOLI | * | P0ABC3 | P27836 | hflc_ecoli | wecg_ecoli  |
| P0ABC3 | HFLC_ECOLI | * | P0ABC3 | P77774 | hflc_ecoli | yfgl_ecoli  |
| P0ABC7 | HFLK_ECOLI |   | none   |        |            |             |
| P25519 | HFLX_ECOLI |   | none   |        |            |             |
| P0A6X3 | HFQ_ECOLI  | * | P0A6X3 | P33224 | hfq_ecoli  | aidb_ecoli  |
| P0A6X3 | HFQ_ECOLI  | * | P0A6X3 | P0A9Y6 | hfq_ecoli  | cspc_ecoli  |
| P0A6X3 | HFQ_ECOLI  | * | P0A6X3 | P69913 | hfq_ecoli  | csra_ecoli  |
| P0A6X3 | HFQ_ECOLI  | * | P0A6X3 | P0ACF0 | hfq_ecoli  | dbha_ecoli  |
| P0A6X3 | HFQ_ECOLI  | * | P0A6X3 | P0ACF0 | hfq_ecoli  | dbha_ecoli  |
| P0A6X3 | HFQ_ECOLI  | * | P0A6X3 | P0ACF4 | hfq_ecoli  | dbhb_ecoli  |
| P0A6X3 | HFQ_ECOLI  | * | P0A6X3 | P0A9P6 | hfq_ecoli  | dead_ecoli  |
| P0A6X3 | HFQ_ECOLI  | * | P0A6X3 | P08622 | hfq_ecoli  | dnaj_ecoli  |
| P0A6X3 | HFQ_ECOLI  | * | P0A6X3 | P0A6Y8 | hfq_ecoli  | dnak_ecoli  |
| P0A6X3 | HFQ_ECOLI  | * | P0A6X3 | P0CE47 | hfq_ecoli  | eftu1_ecoli |
| P0A6X3 | HFQ_ECOLI  | * | P0A6X3 | P0A6P9 | hfq_ecoli  | eno_ecoli   |
| P0A6X3 | HFQ_ECOLI  | * | P0A6X3 | P43329 | hfq_ecoli  | hrpa_ecoli  |
| P0A6X3 | HFQ_ECOLI  | * | P0A6X3 | P0A9M0 | hfq_ecoli  | lon_ecoli   |
| P0A6X3 | HFQ_ECOLI  | * | P0A6X3 | P21645 | hfq_ecoli  | lpxd_ecoli  |
| P0A6X3 | HFQ_ECOLI  | * | P0A6X3 | P68739 | hfq_ecoli  | nfi_ecoli   |
| P0A6X3 | HFQ_ECOLI  | * | P0A6X3 | P05055 | hfq_ecoli  | pnp_ecoli   |
| P0A6X3 | HFQ_ECOLI  | * | P0A6X3 | P0AG30 | hfq_ecoli  | rho_ecoli   |
| P0A6X3 | HFQ_ECOLI  | * | P0A6X3 | P0AG30 | hfq_ecoli  | rho_ecoli   |
| P0A6X3 | HFQ_ECOLI  | * | P0A6X3 | P0A7L0 | hfq_ecoli  | rl1_ecoli   |
| P0A6X3 | HFQ_ECOLI  | * | P0A6X3 | P0AA10 | hfq_ecoli  | rl13_ecoli  |
| P0A6X3 | HFQ_ECOLI  | * | P0A6X3 | P0ADY3 | hfq_ecoli  | rl14_ecoli  |
| P0A6X3 | HFQ_ECOLI  | * | P0A6X3 | P02413 | hfq_ecoli  | rl15_ecoli  |
| P0A6X3 | HFQ_ECOLI  | * | P0A6X3 | P0A7K6 | hfq_ecoli  | rl19_ecoli  |
| P0A6X3 | HFQ_ECOLI  | * | P0A6X3 | P60422 | hfq_ecoli  | rl2_ecoli   |
| P0A6X3 | HFQ_ECOLI  | * | P0A6X3 | P60422 | hfq_ecoli  | rl2_ecoli   |
| P0A6X3 | HFQ_ECOLI  | * | P0A6X3 | P0A7L3 | hfq_ecoli  | rl20_ecoli  |
| P0A6X3 | HFQ_ECOLI  | * | P0A6X3 | P0AG48 | hfq_ecoli  | rl21_ecoli  |
| P0A6X3 | HFQ_ECOLI  | * | P0A6X3 | P61175 | hfq_ecoli  | rl22_ecoli  |
| P0A6X3 | HFQ_ECOLI  | * | P0A6X3 | P60624 | hfq_ecoli  | rl24_ecoli  |
| P0A6X3 | HFQ_ECOLI  | * | P0A6X3 | P0A7M2 | hfq_ecoli  | rl28_ecoli  |
| P0A6X3 | HFQ_ECOLI  | * | P0A6X3 | P60438 | hfq_ecoli  | rl3_ecoli   |
| P0A6X3 | HFQ_ECOLI  | * | P0A6X3 | P60438 | hfq_ecoli  | rl3_ecoli   |
| P0A6X3 | HFQ_ECOLI  | * | P0A6X3 | P60723 | hfq_ecoli  | rl4_ecoli   |
| P0A6X3 | HFQ_ECOLI  | * | P0A6X3 | P60723 | hfq_ecoli  | rl4_ecoli   |
| P0A6X3 | HFQ_ECOLI  | * | P0A6X3 | P0A7K2 | hfq_ecoli  | rl7_ecoli   |
| P0A6X3 | HFQ_ECOLI  | * | P0A6X3 | P0A7R1 | hfq_ecoli  | rl9_ecoli   |
| P0A6X3 | HFQ_ECOLI  | * | P0A6X3 | P75864 | hfq_ecoli  | rlml_ecoli  |

|        |            |   |        |        |            |             |
|--------|------------|---|--------|--------|------------|-------------|
| P0A6X3 | HFQ_ECOLI  | * | P0A6X3 | P37765 | hfq_ecoli  | rlub_ecoli  |
| P0A6X3 | HFQ_ECOLI  | * | P0A6X3 | P21513 | hfq_ecoli  | rne_ecoli   |
| P0A6X3 | HFQ_ECOLI  | * | P0A6X3 | P0A9J0 | hfq_ecoli  | rng_ecoli   |
| P0A6X3 | HFQ_ECOLI  | * | P0A6X3 | P21499 | hfq_ecoli  | rnr_ecoli   |
| P0A6X3 | HFQ_ECOLI  | * | P0A6X3 | P21499 | hfq_ecoli  | rnr_ecoli   |
| P0A6X3 | HFQ_ECOLI  | * | P0A6X3 | P0ACI0 | hfq_ecoli  | rob_ecoli   |
| P0A6X3 | HFQ_ECOLI  | * | P0A6X3 | P0A7Z4 | hfq_ecoli  | rpoa_ecoli  |
| P0A6X3 | HFQ_ECOLI  | * | P0A6X3 | P0A8V2 | hfq_ecoli  | rpob_ecoli  |
| P0A6X3 | HFQ_ECOLI  | * | P0A6X3 | P0A8T7 | hfq_ecoli  | rpoc_ecoli  |
| P0A6X3 | HFQ_ECOLI  | * | P0A6X3 | P0AG67 | hfq_ecoli  | rs1_ecoli   |
| P0A6X3 | HFQ_ECOLI  | * | P0A6X3 | P0AG67 | hfq_ecoli  | rs1_ecoli   |
| P0A6X3 | HFQ_ECOLI  | * | P0A6X3 | P0A7S9 | hfq_ecoli  | rs13_ecoli  |
| P0A6X3 | HFQ_ECOLI  | * | P0A6X3 | P0A7S9 | hfq_ecoli  | rs13_ecoli  |
| P0A6X3 | HFQ_ECOLI  | * | P0A6X3 | P0A7T3 | hfq_ecoli  | rs16_ecoli  |
| P0A6X3 | HFQ_ECOLI  | * | P0A6X3 | P0A7T7 | hfq_ecoli  | rs18_ecoli  |
| P0A6X3 | HFQ_ECOLI  | * | P0A6X3 | P0A7V0 | hfq_ecoli  | rs2_ecoli   |
| P0A6X3 | HFQ_ECOLI  | * | P0A6X3 | P0A7V0 | hfq_ecoli  | rs2_ecoli   |
| P0A6X3 | HFQ_ECOLI  | * | P0A6X3 | P0A7V3 | hfq_ecoli  | rs3_ecoli   |
| P0A6X3 | HFQ_ECOLI  | * | P0A6X3 | P0A7V8 | hfq_ecoli  | rs4_ecoli   |
| P0A6X3 | HFQ_ECOLI  | * | P0A6X3 | P0A7V8 | hfq_ecoli  | rs4_ecoli   |
| P0A6X3 | HFQ_ECOLI  | * | P0A6X3 | P0A7W1 | hfq_ecoli  | rs5_ecoli   |
| P0A6X3 | HFQ_ECOLI  | * | P0A6X3 | P02358 | hfq_ecoli  | rs6_ecoli   |
| P0A6X3 | HFQ_ECOLI  | * | P0A6X3 | P02359 | hfq_ecoli  | rs7_ecoli   |
| P0A6X3 | HFQ_ECOLI  | * | P0A6X3 | P10408 | hfq_ecoli  | seca_ecoli  |
| P0A6X3 | HFQ_ECOLI  | * | P0A6X3 | P14081 | hfq_ecoli  | selb_ecoli  |
| P0A6X3 | HFQ_ECOLI  | * | P0A6X3 | P0AEU7 | hfq_ecoli  | skp_ecoli   |
| P0A6X3 | HFQ_ECOLI  | * | P0A6X3 | P0AEU7 | hfq_ecoli  | skp_ecoli   |
| P0A6X3 | HFQ_ECOLI  | * | P0A6X3 | P0AG24 | hfq_ecoli  | spot_ecoli  |
| P0A6X3 | HFQ_ECOLI  | * | P0A6X3 | P0A847 | hfq_ecoli  | tgt_ecoli   |
| P0A6X3 | HFQ_ECOLI  | * | P0A6X3 | P0A850 | hfq_ecoli  | tig_ecoli   |
| P0A6X3 | HFQ_ECOLI  | * | P0A6X3 | P39177 | hfq_ecoli  | uspg_ecoli  |
| P0A6X3 | HFQ_ECOLI  | * | P0A6X3 | P08245 | hfq_ecoli  | ycih_ecoli  |
| P0A6X3 | HFQ_ECOLI  | * | P0A6X3 | P0AGJ5 | hfq_ecoli  | yfif_ecoli  |
| P0A6X3 | HFQ_ECOLI  | * | P0A6X3 | P25728 | hfq_ecoli  | ygba_ecoli  |
| P0A6X3 | HFQ_ECOLI  | * | P0A6X3 | P30871 | hfq_ecoli  | ygif_ecoli  |
| P0ACE7 | HINT_ECOLI | * | P0ACE7 | P0ABD5 | hint_ecoli | acca_ecoli  |
| P0ACE7 | HINT_ECOLI | * | P0ACE7 | P0ABA6 | hint_ecoli | atpg_ecoli  |
| P0ACE7 | HINT_ECOLI | * | P0ACE7 | P0A6Y8 | hint_ecoli | dnak_ecoli  |
| P0ACE7 | HINT_ECOLI | * | P0ACE7 | P0A988 | hint_ecoli | dpo3b_ecoli |
| P0ACE7 | HINT_ECOLI | * | P0ACE7 | P0CE47 | hint_ecoli | eftu1_ecoli |
| P0ACE7 | HINT_ECOLI | * | P0ACE7 | P0AEZ7 | hint_ecoli | mltd_ecoli  |
| P0ACE7 | HINT_ECOLI | * | P0ACE7 | P22523 | hint_ecoli | mukb_ecoli  |
| P0ACE7 | HINT_ECOLI | * | P0ACE7 | P18843 | hint_ecoli | nade_ecoli  |
| P0ACE7 | HINT_ECOLI | * | P0ACE7 | P0AFD6 | hint_ecoli | nuoi_ecoli  |

|        |             |   |        |        |            |            |
|--------|-------------|---|--------|--------|------------|------------|
| P0ACE7 | HINT_ECOLI  | * | P0ACE7 | P0A862 | hint_ecoli | tpx_ecoli  |
| P0ACE7 | HINT_ECOLI  | * | P0ACE7 | P77561 | hint_ecoli | ydep_ecoli |
| P0ACE7 | HINT_ECOLI  | * | P0ACE7 | P0A894 | hint_ecoli | yhbj_ecoli |
| P0ACE7 | HINT_ECOLI  | * | P0ACE7 | P39359 | hint_ecoli | yjhh_ecoli |
| P60757 | HIS1_ECOLI  |   | none   |        |            |            |
| P10371 | HIS4_ECOLI  | * | P10371 | P0A6Y8 | his4_ecoli | dnak_ecoli |
| P10371 | HIS4_ECOLI  | * | P10371 | P0C077 | his4_ecoli | rele_ecoli |
| P06987 | HIS7_ECOLI  | * | P06987 | P09831 | his7_ecoli | gltb_ecoli |
| P06987 | HIS7_ECOLI  | * | P06987 | P15038 | his7_ecoli | held_ecoli |
| P06986 | HIS8_ECOLI  | * | P06986 | P23874 | his8_ecoli | hipa_ecoli |
| P06986 | HIS8_ECOLI  | * | P06986 | P06988 | his8_ecoli | hisx_ecoli |
| P06986 | HIS8_ECOLI  | * | P06986 | P0A9J8 | his8_ecoli | phes_ecoli |
| P67910 | HLDD_ECOLI  | * | P67910 | P0A6F5 | hldd_ecoli | ch60_ecoli |
| P67910 | HLDD_ECOLI  | * | P67910 | P16703 | hldd_ecoli | cysm_ecoli |
| P67910 | HLDD_ECOLI  | * | P67910 | P77268 | hldd_ecoli | ddpd_ecoli |
| P67910 | HLDD_ECOLI  | * | P67910 | P0A6Y8 | hldd_ecoli | dnak_ecoli |
| P67910 | HLDD_ECOLI  | * | P67910 | P11454 | hldd_ecoli | entf_ecoli |
| P67910 | HLDD_ECOLI  | * | P67910 | P02413 | hldd_ecoli | rl15_ecoli |
| P67910 | HLDD_ECOLI  | * | P67910 | P0A7K6 | hldd_ecoli | rl19_ecoli |
| P67910 | HLDD_ECOLI  | * | P67910 | P60438 | hldd_ecoli | rl3_ecoli  |
| P67910 | HLDD_ECOLI  | * | P67910 | P02359 | hldd_ecoli | rs7_ecoli  |
| P67910 | HLDD_ECOLI  | * | P67910 | P02359 | hldd_ecoli | rs7_ecoli  |
| P67910 | HLDD_ECOLI  | * | P67910 | P10408 | hldd_ecoli | seca_ecoli |
| P67910 | HLDD_ECOLI  | * | P67910 | P33225 | hldd_ecoli | tora_ecoli |
| P67910 | HLDD_ECOLI  | * | P67910 | P75829 | hldd_ecoli | ybjx_ecoli |
| P67910 | HLDD_ECOLI  | * | P67910 | P76069 | hldd_ecoli | yday_ecoli |
| P67910 | HLDD_ECOLI  | * | P67910 | P0ADI9 | hldd_ecoli | yhhn_ecoli |
| P67910 | HLDD_ECOLI  | * | P67910 | P37657 | hldd_ecoli | yhjs_ecoli |
| P76658 | HLDE_ECOLI  |   | none   |        |            |            |
| P08715 | HLYAP_ECOLX |   | none   |        |            |            |
| P0ACF8 | HNS_ECOLI   | * | P0ACF8 | P64467 | hns_ecoli  | cnu_ecoli  |
| P0ACF8 | HNS_ECOLI   | * | P0ACF8 | P0ACF0 | hns_ecoli  | dbha_ecoli |
| P0ACF8 | HNS_ECOLI   | * | P0ACF8 | P0A717 | hns_ecoli  | kprs_ecoli |
| P0ACF8 | HNS_ECOLI   | * | P0ACF8 | P15977 | hns_ecoli  | malq_ecoli |
| P0ACF8 | HNS_ECOLI   | * | P0ACF8 | P0AFG8 | hns_ecoli  | odp1_ecoli |
| P0ACF8 | HNS_ECOLI   | * | P0ACF8 | P00490 | hns_ecoli  | phsm_ecoli |
| P0ACF8 | HNS_ECOLI   | * | P0ACF8 | P0ADY3 | hns_ecoli  | rl14_ecoli |

|        |            |      |        |        |                            |                             |
|--------|------------|------|--------|--------|----------------------------|-----------------------------|
| P0ACF8 | HNS_ECOLI  | *    | P0ACF8 | P61175 | <a href="#">hns_ecoli</a>  | <a href="#">rl22_ecoli</a>  |
| P0ACF8 | HNS_ECOLI  | *    | P0ACF8 | P60624 | <a href="#">hns_ecoli</a>  | <a href="#">rl24_ecoli</a>  |
| P0ACF8 | HNS_ECOLI  | *    | P0ACF8 | P0A8V2 | <a href="#">hns_ecoli</a>  | <a href="#">rpob_ecoli</a>  |
| P0ACF8 | HNS_ECOLI  | *    | P0ACF8 | P0A8T7 | <a href="#">hns_ecoli</a>  | <a href="#">rpoc_ecoli</a>  |
| P0ACF8 | HNS_ECOLI  | *    | P0ACF8 | P0A7V0 | <a href="#">hns_ecoli</a>  | <a href="#">rs2_ecoli</a>   |
| P0ACF8 | HNS_ECOLI  | *    | P0ACF8 | P0A7V0 | <a href="#">hns_ecoli</a>  | <a href="#">rs2_ecoli</a>   |
| P0ACF8 | HNS_ECOLI  | *    | P0ACF8 | P0A814 | <a href="#">hns_ecoli</a>  | <a href="#">ruvc_ecoli</a>  |
| P0ACF8 | HNS_ECOLI  | *    | P0ACF8 | P10408 | <a href="#">hns_ecoli</a>  | <a href="#">seca_ecoli</a>  |
| P0ACF8 | HNS_ECOLI  | *    | P0ACF8 | P28043 | <a href="#">hns_ecoli</a>  | <a href="#">ssb2_ecolx</a>  |
| P0ACF8 | HNS_ECOLI  | *    | P0ACF8 | P0ACG1 | <a href="#">hns_ecoli</a>  | <a href="#">stpa_ecoli</a>  |
| P0ACF8 | HNS_ECOLI  | *    | P0ACF8 | P0ACG1 | <a href="#">hns_ecoli</a>  | <a href="#">stpa_ecoli</a>  |
| P0ACF8 | HNS_ECOLI  | *    | P0ACF8 | P75869 | <a href="#">hns_ecoli</a>  | <a href="#">sxy_ecoli</a>   |
| P0ACF8 | HNS_ECOLI  | *    | P0ACF8 | P0A850 | <a href="#">hns_ecoli</a>  | <a href="#">tig_ecoli</a>   |
| P0ACF8 | HNS_ECOLI  | *    | P0ACF8 | P75970 | <a href="#">hns_ecoli</a>  | <a href="#">vxis_ecoli</a>  |
| P0ACF8 | HNS_ECOLI  | *    | P0ACF8 | P76092 | <a href="#">hns_ecoli</a>  | <a href="#">ynbc_ecoli</a>  |
| Q57160 | HPAB_ECOLX | none |        |        |                            |                             |
| Q46978 | HPAG_ECOLX | none |        |        |                            |                             |
| P37352 | HPCE_ECOLX | none |        |        |                            |                             |
| Q47098 | HPCH_ECOLX | none |        |        |                            |                             |
| P0A9M2 | HPRT_ECOLI | none |        |        |                            |                             |
| P43329 | HRPA_ECOLI | *    | P43329 | P0A9P0 | <a href="#">hrpa_ecoli</a> | <a href="#">dldh_ecoli</a>  |
| P43329 | HRPA_ECOLI | *    | P43329 | P0CE47 | <a href="#">hrpa_ecoli</a> | <a href="#">eftu1_ecoli</a> |
| P43329 | HRPA_ECOLI | *    | P43329 | P0AFG8 | <a href="#">hrpa_ecoli</a> | <a href="#">odp1_ecoli</a>  |
| P43329 | HRPA_ECOLI | *    | P43329 | P06959 | <a href="#">hrpa_ecoli</a> | <a href="#">odp2_ecoli</a>  |
| P43329 | HRPA_ECOLI | *    | P43329 | P0A7R1 | <a href="#">hrpa_ecoli</a> | <a href="#">rl9_ecoli</a>   |
| P43329 | HRPA_ECOLI | *    | P43329 | P0AG67 | <a href="#">hrpa_ecoli</a> | <a href="#">rs1_ecoli</a>   |
| P43329 | HRPA_ECOLI | *    | P43329 | P0A7S9 | <a href="#">hrpa_ecoli</a> | <a href="#">rs13_ecoli</a>  |
| P43329 | HRPA_ECOLI | *    | P43329 | P0A7U3 | <a href="#">hrpa_ecoli</a> | <a href="#">rs19_ecoli</a>  |
| P43329 | HRPA_ECOLI | *    | P43329 | P0A7V0 | <a href="#">hrpa_ecoli</a> | <a href="#">rs2_ecoli</a>   |
| P43329 | HRPA_ECOLI | *    | P43329 | P0A7V3 | <a href="#">hrpa_ecoli</a> | <a href="#">rs3_ecoli</a>   |
| P43329 | HRPA_ECOLI | *    | P43329 | P0A7W1 | <a href="#">hrpa_ecoli</a> | <a href="#">rs5_ecoli</a>   |
| P43329 | HRPA_ECOLI | *    | P43329 | P02359 | <a href="#">hrpa_ecoli</a> | <a href="#">rs7_ecoli</a>   |
| P43329 | HRPA_ECOLI | *    | P43329 | P0AGJ5 | <a href="#">hrpa_ecoli</a> | <a href="#">yfif_ecoli</a>  |
| P0A6Z1 | HSCA_ECOLI | *    | P0A6Z1 | P0AE08 | <a href="#">hsca_ecoli</a> | <a href="#">ahpc_ecoli</a>  |
| P0A6Z1 | HSCA_ECOLI | *    | P0A6Z1 | P0ABE7 | <a href="#">hsca_ecoli</a> | <a href="#">c562_ecolx</a>  |
| P0A6Z1 | HSCA_ECOLI | *    | P0A6Z1 | P0AE60 | <a href="#">hsca_ecoli</a> | <a href="#">ceda_ecoli</a>  |
| P0A6Z1 | HSCA_ECOLI | *    | P0A6Z1 | P0A9H9 | <a href="#">hsca_ecoli</a> | <a href="#">chez_ecoli</a>  |
| P0A6Z1 | HSCA_ECOLI | *    | P0A6Z1 | P0ABY2 | <a href="#">hsca_ecoli</a> | <a href="#">flit_ecoli</a>  |



|        |            |   |        |        |            |             |
|--------|------------|---|--------|--------|------------|-------------|
| POA6Z1 | HSCA_ECOLI | * | POA6Z1 | P0AC92 | hsca_ecoli | gnsa_ecoli  |
| POA6Z1 | HSCA_ECOLI | * | POA6Z1 | P0ACD4 | hsca_ecoli | nifu_ecoli  |
| POA6Z1 | HSCA_ECOLI | * | POA6Z1 | P37095 | hsca_ecoli | pepb_ecoli  |
| POA6Z1 | HSCA_ECOLI | * | POA6Z1 | P69791 | hsca_ecoli | ptqa_ecoli  |
| POA6Z1 | HSCA_ECOLI | * | POA6Z1 | P0A7J3 | hsca_ecoli | rl10_ecoli  |
| POA6Z1 | HSCA_ECOLI | * | POA6Z1 | P0A7J3 | hsca_ecoli | rl10_ecoli  |
| POA6Z1 | HSCA_ECOLI | * | POA6Z1 | P0ADY3 | hsca_ecoli | rl14_ecoli  |
| POA6Z1 | HSCA_ECOLI | * | POA6Z1 | P0AG44 | hsca_ecoli | rl17_ecoli  |
| POA6Z1 | HSCA_ECOLI | * | POA6Z1 | P60422 | hsca_ecoli | rl2_ecoli   |
| POA6Z1 | HSCA_ECOLI | * | POA6Z1 | P0A7L3 | hsca_ecoli | rl20_ecoli  |
| POA6Z1 | HSCA_ECOLI | * | POA6Z1 | P62399 | hsca_ecoli | rl5_ecoli   |
| POA6Z1 | HSCA_ECOLI | * | POA6Z1 | P0AG55 | hsca_ecoli | rl6_ecoli   |
| POA6Z1 | HSCA_ECOLI | * | POA6Z1 | P0A7K2 | hsca_ecoli | rl7_ecoli   |
| POA6Z1 | HSCA_ECOLI | * | POA6Z1 | P0A7V3 | hsca_ecoli | rs3_ecoli   |
| POA6Z1 | HSCA_ECOLI | * | POA6Z1 | P0A7V8 | hsca_ecoli | rs4_ecoli   |
| POA6Z1 | HSCA_ECOLI | * | POA6Z1 | P0A7W1 | hsca_ecoli | rs5_ecoli   |
| POA6Z1 | HSCA_ECOLI | * | POA6Z1 | P0A7X3 | hsca_ecoli | rs9_ecoli   |
| POA6Z1 | HSCA_ECOLI | * | POA6Z1 | P10408 | hsca_ecoli | seca_ecoli  |
| POA6Z1 | HSCA_ECOLI | * | POA6Z1 | P0AG80 | hsca_ecoli | ugpb_ecoli  |
| POA6Z1 | HSCA_ECOLI | * | POA6Z1 | Q46797 | hsca_ecoli | ygeq_ecoli  |
| POA6Z1 | HSCA_ECOLI | * | POA6Z1 | P42598 | hsca_ecoli | ygjq_ecoli  |
| POA6Y5 | HSLO_ECOLI | * | POA6Y5 | P0AEC3 | hslo_ecoli | arcb_ecoli  |
| POA6Y5 | HSLO_ECOLI | * | POA6Y5 | P0CE47 | hslo_ecoli | eftu1_ecoli |
| POA6Y5 | HSLO_ECOLI | * | POA6Y5 | P0CE47 | hslo_ecoli | eftu1_ecoli |
| POA6Y5 | HSLO_ECOLI | * | POA6Y5 | P33593 | hslo_ecoli | nikd_ecoli  |
| POA6Y5 | HSLO_ECOLI | * | POA6Y5 | P60438 | hslo_ecoli | rl3_ecoli   |
| POA6Y5 | HSLO_ECOLI | * | POA6Y5 | P0A7R5 | hslo_ecoli | rs10_ecoli  |
| POA6Y5 | HSLO_ECOLI | * | POA6Y5 | P0A7S3 | hslo_ecoli | rs12_ecoli  |
| POA6Y5 | HSLO_ECOLI | * | POA6Y5 | P0A7V0 | hslo_ecoli | rs2_ecoli   |
| POA6Y5 | HSLO_ECOLI | * | POA6Y5 | P0A7V3 | hslo_ecoli | rs3_ecoli   |
| POA6Y5 | HSLO_ECOLI | * | POA6Y5 | P0A7W1 | hslo_ecoli | rs5_ecoli   |
| POA6Y5 | HSLO_ECOLI | * | POA6Y5 | P02359 | hslo_ecoli | rs7_ecoli   |
| POACG8 | HSLR_ECOLI | * | POACG8 | P0A6Y8 | hslr_ecoli | dnak_ecoli  |
| POACG8 | HSLR_ECOLI | * | POACG8 | P28224 | hslr_ecoli | mlic_ecoli  |
| POACG8 | HSLR_ECOLI | * | POACG8 | P0AFJ5 | hslr_ecoli | phob_ecoli  |
| POACG8 | HSLR_ECOLI | * | POACG8 | P0AG30 | hslr_ecoli | rho_ecoli   |
| POACG8 | HSLR_ECOLI | * | POACG8 | P0A7L0 | hslr_ecoli | rl1_ecoli   |
| POACG8 | HSLR_ECOLI | * | POACG8 | P0AA10 | hslr_ecoli | rl13_ecoli  |
| POACG8 | HSLR_ECOLI | * | POACG8 | P0ADY3 | hslr_ecoli | rl14_ecoli  |
| POACG8 | HSLR_ECOLI | * | POACG8 | P0A7K6 | hslr_ecoli | rl19_ecoli  |
| POACG8 | HSLR_ECOLI | * | POACG8 | P60422 | hslr_ecoli | rl2_ecoli   |
| POACG8 | HSLR_ECOLI | * | POACG8 | P61175 | hslr_ecoli | rl22_ecoli  |
| POACG8 | HSLR_ECOLI | * | POACG8 | P0A7M2 | hslr_ecoli | rl28_ecoli  |

|        |            |   |        |        |            |            |
|--------|------------|---|--------|--------|------------|------------|
| P0ACG8 | HSLR_ECOLI | * | P0ACG8 | P60723 | hslr_ecoli | rl4_ecoli  |
| P0ACG8 | HSLR_ECOLI | * | P0ACG8 | P0A7R1 | hslr_ecoli | rl9_ecoli  |
| P0ACG8 | HSLR_ECOLI | * | P0ACG8 | P0A7R5 | hslr_ecoli | rs10_ecoli |
| P0ACG8 | HSLR_ECOLI | * | P0ACG8 | P0A7V0 | hslr_ecoli | rs2_ecoli  |
| P0ACG8 | HSLR_ECOLI | * | P0ACG8 | P0A7V0 | hslr_ecoli | rs2_ecoli  |
| P0ACG8 | HSLR_ECOLI | * | P0ACG8 | P0A7V3 | hslr_ecoli | rs3_ecoli  |
| P0ACG8 | HSLR_ECOLI | * | P0ACG8 | P0A7V8 | hslr_ecoli | rs4_ecoli  |
| P0ACG8 | HSLR_ECOLI | * | P0ACG8 | P0A7W1 | hslr_ecoli | rs5_ecoli  |
| P0ACG8 | HSLR_ECOLI | * | P0ACG8 | P02359 | hslr_ecoli | rs7_ecoli  |
| P0ACG8 | HSLR_ECOLI | * | P0ACG8 | P46850 | hslr_ecoli | rtcb_ecoli |
| P0ACG8 | HSLR_ECOLI | * | P0ACG8 | P13458 | hslr_ecoli | sbcc_ecoli |
| P0ACG8 | HSLR_ECOLI | * | P0ACG8 | P75683 | hslr_ecoli | yagg_ecoli |
| P0ACG8 | HSLR_ECOLI | * | P0ACG8 | P75954 | hslr_ecoli | ycfs_ecoli |

|        |            |   |        |        |            |             |
|--------|------------|---|--------|--------|------------|-------------|
| P0A6H5 | HSLU_ECOLI | * | P0A6H5 | P24182 | hslu_ecoli | acc_c_ecoli |
| P0A6H5 | HSLU_ECOLI | * | P0A6H5 | P0A9Q5 | hslu_ecoli | accd_ecoli  |
| P0A6H5 | HSLU_ECOLI | * | P0A6H5 | P00561 | hslu_ecoli | ak1h_ecoli  |
| P0A6H5 | HSLU_ECOLI | * | P0A6H5 | P0ABD8 | hslu_ecoli | bccp_ecoli  |
| P0A6H5 | HSLU_ECOLI | * | P0A6H5 | P06961 | hslu_ecoli | cca_ecoli   |
| P0A6H5 | HSLU_ECOLI | * | P0A6H5 | P0ABL8 | hslu_ecoli | ccmb_ecoli  |
| P0A6H5 | HSLU_ECOLI | * | P0A6H5 | P0AEB0 | hslu_ecoli | cysw_ecoli  |
| P0A6H5 | HSLU_ECOLI | * | P0A6H5 | P0AEE5 | hslu_ecoli | dgal_ecoli  |
| P0A6H5 | HSLU_ECOLI | * | P0A6H5 | P08622 | hslu_ecoli | dnaj_ecoli  |
| P0A6H5 | HSLU_ECOLI | * | P0A6H5 | P08622 | hslu_ecoli | dnaj_ecoli  |
| P0A6H5 | HSLU_ECOLI | * | P0A6H5 | P0A6Y8 | hslu_ecoli | dnak_ecoli  |
| P0A6H5 | HSLU_ECOLI | * | P0A6H5 | P0A6Y8 | hslu_ecoli | dnak_ecoli  |
| P0A6H5 | HSLU_ECOLI | * | P0A6H5 | P0A6M8 | hslu_ecoli | efg_ecoli   |
| P0A6H5 | HSLU_ECOLI | * | P0A6H5 | P0CE47 | hslu_ecoli | eftu1_ecoli |
| P0A6H5 | HSLU_ECOLI | * | P0A6H5 | P0CE47 | hslu_ecoli | eftu1_ecoli |
| P0A6H5 | HSLU_ECOLI | * | P0A6H5 | P0A9A6 | hslu_ecoli | ftsz_ecoli  |
| P0A6H5 | HSLU_ECOLI | * | P0A6H5 | P0C8J8 | hslu_ecoli | gatz_ecoli  |
| P0A6H5 | HSLU_ECOLI | * | P0A6H5 | P0A7A2 | hslu_ecoli | gpmb_ecoli  |
| P0A6H5 | HSLU_ECOLI | * | P0A6H5 | P0A6H5 | hslu_ecoli | hslu_ecoli  |
| P0A6H5 | HSLU_ECOLI | * | P0A6H5 | P0A7B8 | hslu_ecoli | hslv_ecoli  |
| P0A6H5 | HSLU_ECOLI | * | P0A6H5 | P0A7B8 | hslu_ecoli | hslv_ecoli  |
| P0A6H5 | HSLU_ECOLI | * | P0A6H5 | P0A7B8 | hslu_ecoli | hslv_ecoli  |
| P0A6H5 | HSLU_ECOLI | * | P0A6H5 | P0A7B8 | hslu_ecoli | hslv_ecoli  |
| P0A6H5 | HSLU_ECOLI | * | P0A6H5 | P0A7B8 | hslu_ecoli | hslv_ecoli  |
| P0A6H5 | HSLU_ECOLI | * | P0A6H5 | P0A7B8 | hslu_ecoli | hslv_ecoli  |
| P0A6H5 | HSLU_ECOLI | * | P0A6H5 | P0A7B8 | hslu_ecoli | hslv_ecoli  |
| P0A6H5 | HSLU_ECOLI | * | P0A6H5 | P0A8S1 | hslu_ecoli | icia_ecoli  |
| P0A6H5 | HSLU_ECOLI | * | P0A6H5 | P0A9M0 | hslu_ecoli | lon_ecoli   |
| P0A6H5 | HSLU_ECOLI | * | P0A6H5 | P25665 | hslu_ecoli | mete_ecoli  |
| P0A6H5 | HSLU_ECOLI | * | P0A6H5 | P0A817 | hslu_ecoli | metk_ecoli  |
| P0A6H5 | HSLU_ECOLI | * | P0A6H5 | P0A9X4 | hslu_ecoli | mreb_ecoli  |
| P0A6H5 | HSLU_ECOLI | * | P0A6H5 | P09152 | hslu_ecoli | narg_ecoli  |

|        |            |   |        |        |                            |                             |
|--------|------------|---|--------|--------|----------------------------|-----------------------------|
| POA6H5 | HSLU_ECOLI | * | POA6H5 | P33599 | <a href="#">hslu_ecoli</a> | <a href="#">nuocd_ecoli</a> |
| POA6H5 | HSLU_ECOLI | * | POA6H5 | P0A917 | <a href="#">hslu_ecoli</a> | <a href="#">ompx_ecoli</a>  |
| POA6H5 | HSLU_ECOLI | * | POA6H5 | P0AAH0 | <a href="#">hslu_ecoli</a> | <a href="#">pstb_ecoli</a>  |
| POA6H5 | HSLU_ECOLI | * | POA6H5 | P0A7G6 | <a href="#">hslu_ecoli</a> | <a href="#">reca_ecoli</a>  |
| POA6H5 | HSLU_ECOLI | * | POA6H5 | P25539 | <a href="#">hslu_ecoli</a> | <a href="#">ribd_ecoli</a>  |
| POA6H5 | HSLU_ECOLI | * | POA6H5 | P0A7J3 | <a href="#">hslu_ecoli</a> | <a href="#">rl10_ecoli</a>  |
| POA6H5 | HSLU_ECOLI | * | POA6H5 | P0AA10 | <a href="#">hslu_ecoli</a> | <a href="#">rl13_ecoli</a>  |
| POA6H5 | HSLU_ECOLI | * | POA6H5 | P0ADY7 | <a href="#">hslu_ecoli</a> | <a href="#">rl16_ecoli</a>  |
| POA6H5 | HSLU_ECOLI | * | POA6H5 | P60438 | <a href="#">hslu_ecoli</a> | <a href="#">rl3_ecoli</a>   |
| POA6H5 | HSLU_ECOLI | * | POA6H5 | P60723 | <a href="#">hslu_ecoli</a> | <a href="#">rl4_ecoli</a>   |
| POA6H5 | HSLU_ECOLI | * | POA6H5 | P0A7K2 | <a href="#">hslu_ecoli</a> | <a href="#">rl7_ecoli</a>   |
| POA6H5 | HSLU_ECOLI | * | POA6H5 | P0A7R5 | <a href="#">hslu_ecoli</a> | <a href="#">rs10_ecoli</a>  |
| POA6H5 | HSLU_ECOLI | * | POA6H5 | P0A7V0 | <a href="#">hslu_ecoli</a> | <a href="#">rs2_ecoli</a>   |
| POA6H5 | HSLU_ECOLI | * | POA6H5 | P0A7W1 | <a href="#">hslu_ecoli</a> | <a href="#">rs5_ecoli</a>   |
| POA6H5 | HSLU_ECOLI | * | POA6H5 | P02359 | <a href="#">hslu_ecoli</a> | <a href="#">rs7_ecoli</a>   |
| POA6H5 | HSLU_ECOLI | * | POA6H5 | P10408 | <a href="#">hslu_ecoli</a> | <a href="#">seca_ecoli</a>  |
| POA6H5 | HSLU_ECOLI | * | POA6H5 | P0AFZ5 | <a href="#">hslu_ecoli</a> | <a href="#">sula_ecoli</a>  |
| POA6H5 | HSLU_ECOLI | * | POA6H5 | P77318 | <a href="#">hslu_ecoli</a> | <a href="#">yden_ecoli</a>  |
| POA6H5 | HSLU_ECOLI | * | POA6H5 | P77804 | <a href="#">hslu_ecoli</a> | <a href="#">ydga_ecoli</a>  |
| POA6H5 | HSLU_ECOLI | * | POA6H5 | Q46787 | <a href="#">hslu_ecoli</a> | <a href="#">ygeg_ecoli</a>  |

|        |            |   |        |        |                            |                             |
|--------|------------|---|--------|--------|----------------------------|-----------------------------|
| POA7B8 | HSLV_ECOLI | * | POA7B8 | P0ABD5 | <a href="#">hslv_ecoli</a> | <a href="#">acca_ecoli</a>  |
| POA7B8 | HSLV_ECOLI | * | POA7B8 | P24182 | <a href="#">hslv_ecoli</a> | <a href="#">accs_ecoli</a>  |
| POA7B8 | HSLV_ECOLI | * | POA7B8 | P0A9Q5 | <a href="#">hslv_ecoli</a> | <a href="#">accd_ecoli</a>  |
| POA7B8 | HSLV_ECOLI | * | POA7B8 | P0ABD8 | <a href="#">hslv_ecoli</a> | <a href="#">bccp_ecoli</a>  |
| POA7B8 | HSLV_ECOLI | * | POA7B8 | P0ABL8 | <a href="#">hslv_ecoli</a> | <a href="#">ccmb_ecoli</a>  |
| POA7B8 | HSLV_ECOLI | * | POA7B8 | P0A9P6 | <a href="#">hslv_ecoli</a> | <a href="#">dead_ecoli</a>  |
| POA7B8 | HSLV_ECOLI | * | POA7B8 | P0CE47 | <a href="#">hslv_ecoli</a> | <a href="#">eftu1_ecoli</a> |
| POA7B8 | HSLV_ECOLI | * | POA7B8 | P25527 | <a href="#">hslv_ecoli</a> | <a href="#">gabp_ecoli</a>  |
| POA7B8 | HSLV_ECOLI | * | POA7B8 | P0A6H5 | <a href="#">hslv_ecoli</a> | <a href="#">hslu_ecoli</a>  |
| POA7B8 | HSLV_ECOLI | * | POA7B8 | P0A7B8 | <a href="#">hslv_ecoli</a> | <a href="#">hslv_ecoli</a>  |
| POA7B8 | HSLV_ECOLI | * | POA7B8 | P0A717 | <a href="#">hslv_ecoli</a> | <a href="#">kprs_ecoli</a>  |
| POA7B8 | HSLV_ECOLI | * | POA7B8 | P0A7J3 | <a href="#">hslv_ecoli</a> | <a href="#">rl10_ecoli</a>  |
| POA7B8 | HSLV_ECOLI | * | POA7B8 | P0AG44 | <a href="#">hslv_ecoli</a> | <a href="#">rl17_ecoli</a>  |
| POA7B8 | HSLV_ECOLI | * | POA7B8 | P0A7K6 | <a href="#">hslv_ecoli</a> | <a href="#">rl19_ecoli</a>  |
| POA7B8 | HSLV_ECOLI | * | POA7B8 | P60422 | <a href="#">hslv_ecoli</a> | <a href="#">rl2_ecoli</a>   |
| POA7B8 | HSLV_ECOLI | * | POA7B8 | P0AG48 | <a href="#">hslv_ecoli</a> | <a href="#">rl21_ecoli</a>  |
| POA7B8 | HSLV_ECOLI | * | POA7B8 | P61175 | <a href="#">hslv_ecoli</a> | <a href="#">rl22_ecoli</a>  |
| POA7B8 | HSLV_ECOLI | * | POA7B8 | P61175 | <a href="#">hslv_ecoli</a> | <a href="#">rl22_ecoli</a>  |
| POA7B8 | HSLV_ECOLI | * | POA7B8 | P60624 | <a href="#">hslv_ecoli</a> | <a href="#">rl24_ecoli</a>  |
| POA7B8 | HSLV_ECOLI | * | POA7B8 | P0A7M6 | <a href="#">hslv_ecoli</a> | <a href="#">rl29_ecoli</a>  |
| POA7B8 | HSLV_ECOLI | * | POA7B8 | P60438 | <a href="#">hslv_ecoli</a> | <a href="#">rl3_ecoli</a>   |
| POA7B8 | HSLV_ECOLI | * | POA7B8 | P60438 | <a href="#">hslv_ecoli</a> | <a href="#">rl3_ecoli</a>   |
| POA7B8 | HSLV_ECOLI | * | POA7B8 | P0A7N9 | <a href="#">hslv_ecoli</a> | <a href="#">rl33_ecoli</a>  |
| POA7B8 | HSLV_ECOLI | * | POA7B8 | P60723 | <a href="#">hslv_ecoli</a> | <a href="#">rl4_ecoli</a>   |

|        |            |      |        |        |            |             |
|--------|------------|------|--------|--------|------------|-------------|
| P0A7B8 | HSLV_ECOLI | *    | P0A7B8 | P60723 | hslv_ecoli | rl4_ecoli   |
| P0A7B8 | HSLV_ECOLI | *    | P0A7B8 | P0A7K2 | hslv_ecoli | rl7_ecoli   |
| P0A7B8 | HSLV_ECOLI | *    | P0A7B8 | P0A7R1 | hslv_ecoli | rl9_ecoli   |
| P0A7B8 | HSLV_ECOLI | *    | P0A7B8 | P37765 | hslv_ecoli | rlub_ecoli  |
| P0A7B8 | HSLV_ECOLI | *    | P0A7B8 | P0A7S9 | hslv_ecoli | rs13_ecoli  |
| P0A7B8 | HSLV_ECOLI | *    | P0A7B8 | P0A7T3 | hslv_ecoli | rs16_ecoli  |
| P0A7B8 | HSLV_ECOLI | *    | P0A7B8 | P02359 | hslv_ecoli | rs7_ecoli   |
| P0A7B8 | HSLV_ECOLI | *    | P0A7B8 | P0A858 | hslv_ecoli | tpis_ecoli  |
| P0A7B8 | HSLV_ECOLI | *    | P0A7B8 | P0ADS9 | hslv_ecoli | yggg_ecoli  |
| P0A7B8 | HSLV_ECOLI | *    | P0A7B8 | Q46844 | hslv_ecoli | yght_ecoli  |
| P0A7B8 | HSLV_ECOLI | *    | P0A7B8 | P37642 | hslv_ecoli | yhjd_ecoli  |
| P0A7B8 | HSLV_ECOLI | *    | P0A7B8 | P0A8H6 | hslv_ecoli | yihj_ecoli  |
| P0A6Z3 | HTPG_ECOLI | *    | P0A6Z3 | P36553 | htpg_ecoli | hem6_ecoli  |
| P0A6Z3 | HTPG_ECOLI | *    | P0A6Z3 | P77329 | htpg_ecoli | hyfg_ecoli  |
| P0A6Z3 | HTPG_ECOLI | *    | P0A6Z3 | P15005 | htpg_ecoli | mcrb_ecoli  |
| P0A6Z3 | HTPG_ECOLI | *    | P0A6Z3 | P37095 | htpg_ecoli | pepb_ecoli  |
| P0A6Z3 | HTPG_ECOLI | *    | P0A6Z3 | P60422 | htpg_ecoli | rl2_ecoli   |
| P0A6Z3 | HTPG_ECOLI | *    | P0A6Z3 | P0A7M6 | htpg_ecoli | rl29_ecoli  |
| P0A6Z3 | HTPG_ECOLI | *    | P0A6Z3 | P0A7N9 | htpg_ecoli | rl33_ecoli  |
| P0A6Z3 | HTPG_ECOLI | *    | P0A6Z3 | P0A8T7 | htpg_ecoli | rpoc_ecoli  |
| P0A6Z3 | HTPG_ECOLI | *    | P0A6Z3 | P02358 | htpg_ecoli | rs6_ecoli   |
| P0A6Z3 | HTPG_ECOLI | *    | P0A6Z3 | P02359 | htpg_ecoli | rs7_ecoli   |
| P0A6Z3 | HTPG_ECOLI | *    | P0A6Z3 | P0AG80 | htpg_ecoli | ugpb_ecoli  |
| P0A6Z3 | HTPG_ECOLI | *    | P0A6Z3 | P75862 | htpg_ecoli | ycbw_ecoli  |
| P0A6Z3 | HTPG_ECOLI | *    | P0A6Z3 | P76236 | htpg_ecoli | yeai_ecoli  |
| P0A6Z3 | HTPG_ECOLI | *    | P0A6Z3 | P52052 | htpg_ecoli | yggg_ecoli  |
| P37180 | HYBB_ECOLI | none |        |        |            |             |
| P37182 | HYBD_ECOLI | *    | P37182 | P30128 | hybd_ecoli | greb_ecoli  |
| P37182 | HYBD_ECOLI | *    | P37182 | P60422 | hybd_ecoli | rl2_ecoli   |
| P37182 | HYBD_ECOLI | *    | P37182 | P76121 | hybd_ecoli | yddh_ecoli  |
| P37182 | HYBD_ECOLI | *    | P37182 | P0ADK8 | hybd_ecoli | yibl_ecoli  |
| P0AEV4 | HYCA_ECOLI | none |        |        |            |             |
| P0AAK1 | HYCB_ECOLI | none |        |        |            |             |
| P77423 | HYFH_ECOLI | none |        |        |            |             |
| P30131 | HYPF_ECOLI | none |        |        |            |             |
| P39377 | IADA_ECOLI | *    | P39377 | P10443 | iada_ecoli | dpo3a_ecoli |
| P39377 | IADA_ECOLI | *    | P39377 | P16919 | iada_ecoli | rhsd_ecoli  |

|        |            |   |        |        |                            |                            |
|--------|------------|---|--------|--------|----------------------------|----------------------------|
| P39377 | IADA_ECOLI | * | P39377 | P06612 | <a href="#">iada_ecoli</a> | <a href="#">top1_ecoli</a> |
| P39377 | IADA_ECOLI | * | P39377 | P37338 | <a href="#">iada_ecoli</a> | <a href="#">ygae_ecoli</a> |
| P16528 | ICLR_ECOLI | * | P16528 | P67910 | <a href="#">iclr_ecoli</a> | <a href="#">hldd_ecoli</a> |
| P16528 | ICLR_ECOLI | * | P16528 | P06959 | <a href="#">iclr_ecoli</a> | <a href="#">odp2_ecoli</a> |
| P16528 | ICLR_ECOLI | * | P16528 | P0A7L0 | <a href="#">iclr_ecoli</a> | <a href="#">rl1_ecoli</a>  |
| P16528 | ICLR_ECOLI | * | P16528 | P0AA10 | <a href="#">iclr_ecoli</a> | <a href="#">rl13_ecoli</a> |
| P16528 | ICLR_ECOLI | * | P16528 | P0A7L3 | <a href="#">iclr_ecoli</a> | <a href="#">rl20_ecoli</a> |
| P16528 | ICLR_ECOLI | * | P16528 | P0AG48 | <a href="#">iclr_ecoli</a> | <a href="#">rl21_ecoli</a> |
| P16528 | ICLR_ECOLI | * | P16528 | P61175 | <a href="#">iclr_ecoli</a> | <a href="#">rl22_ecoli</a> |
| P16528 | ICLR_ECOLI | * | P16528 | P60624 | <a href="#">iclr_ecoli</a> | <a href="#">rl24_ecoli</a> |
| P16528 | ICLR_ECOLI | * | P16528 | P60723 | <a href="#">iclr_ecoli</a> | <a href="#">rl4_ecoli</a>  |
| P16528 | ICLR_ECOLI | * | P16528 | P0A7S9 | <a href="#">iclr_ecoli</a> | <a href="#">rs13_ecoli</a> |
| P16528 | ICLR_ECOLI | * | P16528 | P0AG59 | <a href="#">iclr_ecoli</a> | <a href="#">rs14_ecoli</a> |
| P16528 | ICLR_ECOLI | * | P16528 | P0A7V0 | <a href="#">iclr_ecoli</a> | <a href="#">rs2_ecoli</a>  |
| P16528 | ICLR_ECOLI | * | P16528 | P0A7V3 | <a href="#">iclr_ecoli</a> | <a href="#">rs3_ecoli</a>  |
| P16528 | ICLR_ECOLI | * | P16528 | P0A7W1 | <a href="#">iclr_ecoli</a> | <a href="#">rs5_ecoli</a>  |
| P16528 | ICLR_ECOLI | * | P16528 | P02358 | <a href="#">iclr_ecoli</a> | <a href="#">rs6_ecoli</a>  |
| P16528 | ICLR_ECOLI | * | P16528 | P02359 | <a href="#">iclr_ecoli</a> | <a href="#">rs7_ecoli</a>  |
| P16528 | ICLR_ECOLI | * | P16528 | P0A7W7 | <a href="#">iclr_ecoli</a> | <a href="#">rs8_ecoli</a>  |
| P08200 | IDH_ECOLI  | * | P08200 | P18843 | <a href="#">idh_ecoli</a>  | <a href="#">nade_ecoli</a> |
| P08200 | IDH_ECOLI  | * | P08200 | P76515 | <a href="#">idh_ecoli</a>  | <a href="#">yfds_ecoli</a> |
| P08200 | IDH_ECOLI  | * | P08200 | P0ADK8 | <a href="#">idh_ecoli</a>  | <a href="#">yibl_ecoli</a> |
| P08200 | IDH_ECOLI  | * | P08200 | P76148 | <a href="#">idh_ecoli</a>  | <a href="#">yneg_ecoli</a> |
| P69222 | IF1_ECOLI  | * | P69222 | P31224 | <a href="#">if1_ecoli</a>  | <a href="#">acrb_ecoli</a> |
| P69222 | IF1_ECOLI  | * | P69222 | P00722 | <a href="#">if1_ecoli</a>  | <a href="#">bgal_ecoli</a> |
| P69222 | IF1_ECOLI  | * | P69222 | P18843 | <a href="#">if1_ecoli</a>  | <a href="#">nade_ecoli</a> |
| P0A705 | IF2_ECOLI  | * | P0A705 | P39451 | <a href="#">if2_ecoli</a>  | <a href="#">adhp_ecoli</a> |
| P0A705 | IF2_ECOLI  | * | P0A705 | P23325 | <a href="#">if2_ecoli</a>  | <a href="#">arpa_ecoli</a> |
| P0A705 | IF2_ECOLI  | * | P0A705 | P0AE30 | <a href="#">if2_ecoli</a>  | <a href="#">artm_ecoli</a> |
| P0A705 | IF2_ECOLI  | * | P0A705 | P0A6Y8 | <a href="#">if2_ecoli</a>  | <a href="#">dnak_ecoli</a> |
| P0A705 | IF2_ECOLI  | * | P0A705 | P0AC73 | <a href="#">if2_ecoli</a>  | <a href="#">ebgc_ecoli</a> |
| P0A705 | IF2_ECOLI  | * | P0A705 | P52613 | <a href="#">if2_ecoli</a>  | <a href="#">flij_ecoli</a> |
| P0A705 | IF2_ECOLI  | * | P0A705 | P0A6W5 | <a href="#">if2_ecoli</a>  | <a href="#">grea_ecoli</a> |
| P0A705 | IF2_ECOLI  | * | P0A705 | P09372 | <a href="#">if2_ecoli</a>  | <a href="#">grpe_ecoli</a> |
| P0A705 | IF2_ECOLI  | * | P0A705 | P30750 | <a href="#">if2_ecoli</a>  | <a href="#">metn_ecoli</a> |
| P0A705 | IF2_ECOLI  | * | P0A705 | P77569 | <a href="#">if2_ecoli</a>  | <a href="#">mhpr_ecoli</a> |
| P0A705 | IF2_ECOLI  | * | P0A705 | P00634 | <a href="#">if2_ecoli</a>  | <a href="#">ppb_ecoli</a>  |
| P0A705 | IF2_ECOLI  | * | P0A705 | P00634 | <a href="#">if2_ecoli</a>  | <a href="#">ppb_ecoli</a>  |
| P0A705 | IF2_ECOLI  | * | P0A705 | P25888 | <a href="#">if2_ecoli</a>  | <a href="#">rhle_ecoli</a> |
| P0A705 | IF2_ECOLI  | * | P0A705 | P25539 | <a href="#">if2_ecoli</a>  | <a href="#">ribd_ecoli</a> |
| P0A705 | IF2_ECOLI  | * | P0A705 | P43672 | <a href="#">if2_ecoli</a>  | <a href="#">uup_ecoli</a>  |

|        |            |   |        |        |            |            |
|--------|------------|---|--------|--------|------------|------------|
| POA705 | IF2_ECOLI  | * | POA705 | P30177 | if2_ecoli  | ybib_ecoli |
| POA705 | IF2_ECOLI  | * | POA705 | P46144 | if2_ecoli  | yedj_ecoli |
| POA705 | IF2_ECOLI  | * | POA705 | P0ADE8 | if2_ecoli  | ygfz_ecoli |
| POA707 | IF3_ECOLI  | * | POA707 | P0ABL8 | if3_ecoli  | ccmb_ecoli |
| POA707 | IF3_ECOLI  | * | POA707 | P0AEB2 | if3_ecoli  | daca_ecoli |
| POA707 | IF3_ECOLI  | * | POA707 | P0ACF4 | if3_ecoli  | dbhb_ecoli |
| POA707 | IF3_ECOLI  | * | POA707 | P0A9J0 | if3_ecoli  | rng_ecoli  |
| POA707 | IF3_ECOLI  | * | POA707 | P77499 | if3_ecoli  | sufc_ecoli |
| POA707 | IF3_ECOLI  | * | POA707 | P0AGJ5 | if3_ecoli  | yfif_ecoli |
| POA707 | IF3_ECOLI  | * | POA707 | P0AGK4 | if3_ecoli  | yhby_ecoli |
| POA707 | IF3_ECOLI  | * | POA707 | P76092 | if3_ecoli  | ynbc_ecoli |
| POA6X7 | IHFA_ECOLI | * | POA6X7 | P33997 | ihfa_ecoli | alpa_ecoli |
| POA6X7 | IHFA_ECOLI | * | POA6X7 | P0A6Y8 | ihfa_ecoli | dnak_ecoli |
| POA6X7 | IHFA_ECOLI | * | POA6X7 | P0A6Y1 | ihfa_ecoli | ihfb_ecoli |
| POA6X7 | IHFA_ECOLI | * | POA6X7 | P18843 | ihfa_ecoli | nade_ecoli |
| POA6X7 | IHFA_ECOLI | * | POA6X7 | P0A7L0 | ihfa_ecoli | rl1_ecoli  |
| POA6X7 | IHFA_ECOLI | * | POA6X7 | P0ADY3 | ihfa_ecoli | rl14_ecoli |
| POA6X7 | IHFA_ECOLI | * | POA6X7 | P60438 | ihfa_ecoli | rl3_ecoli  |
| POA6X7 | IHFA_ECOLI | * | POA6X7 | P62399 | ihfa_ecoli | rl5_ecoli  |
| POA6X7 | IHFA_ECOLI | * | POA6X7 | P0A7V0 | ihfa_ecoli | rs2_ecoli  |
| POA6X7 | IHFA_ECOLI | * | POA6X7 | P0A7V8 | ihfa_ecoli | rs4_ecoli  |
| POA6X7 | IHFA_ECOLI | * | POA6X7 | P0A7V8 | ihfa_ecoli | rs4_ecoli  |
| POA6X7 | IHFA_ECOLI | * | POA6X7 | P33341 | ihfa_ecoli | yejb_ecoli |
| POA6Y1 | IHFB_ECOLI | * | POA6Y1 | P07639 | ihfb_ecoli | arob_ecoli |
| POA6Y1 | IHFB_ECOLI | * | POA6Y1 | P0ACF0 | ihfb_ecoli | dbha_ecoli |
| POA6Y1 | IHFB_ECOLI | * | POA6Y1 | P0ACF4 | ihfb_ecoli | dbhb_ecoli |
| POA6Y1 | IHFB_ECOLI | * | POA6Y1 | P0AER8 | ihfb_ecoli | gltc_ecoli |
| POA6Y1 | IHFB_ECOLI | * | POA6Y1 | P0A6X7 | ihfb_ecoli | ihfa_ecoli |
| POA6Y1 | IHFB_ECOLI | * | POA6Y1 | P0AFF6 | ihfb_ecoli | nusa_ecoli |
| POA6Y1 | IHFB_ECOLI | * | POA6Y1 | P0A7L0 | ihfb_ecoli | rl1_ecoli  |
| POA6Y1 | IHFB_ECOLI | * | POA6Y1 | P0AA10 | ihfb_ecoli | rl13_ecoli |
| POA6Y1 | IHFB_ECOLI | * | POA6Y1 | P02413 | ihfb_ecoli | rl15_ecoli |
| POA6Y1 | IHFB_ECOLI | * | POA6Y1 | P0ADY7 | ihfb_ecoli | rl16_ecoli |
| POA6Y1 | IHFB_ECOLI | * | POA6Y1 | P0A7K6 | ihfb_ecoli | rl19_ecoli |
| POA6Y1 | IHFB_ECOLI | * | POA6Y1 | P60422 | ihfb_ecoli | rl2_ecoli  |
| POA6Y1 | IHFB_ECOLI | * | POA6Y1 | P0AG48 | ihfb_ecoli | rl21_ecoli |
| POA6Y1 | IHFB_ECOLI | * | POA6Y1 | P61175 | ihfb_ecoli | rl22_ecoli |
| POA6Y1 | IHFB_ECOLI | * | POA6Y1 | P0ADZ0 | ihfb_ecoli | rl23_ecoli |
| POA6Y1 | IHFB_ECOLI | * | POA6Y1 | P0A7M6 | ihfb_ecoli | rl29_ecoli |
| POA6Y1 | IHFB_ECOLI | * | POA6Y1 | P60438 | ihfb_ecoli | rl3_ecoli  |
| POA6Y1 | IHFB_ECOLI | * | POA6Y1 | P0A7N9 | ihfb_ecoli | rl33_ecoli |
| POA6Y1 | IHFB_ECOLI | * | POA6Y1 | P60723 | ihfb_ecoli | rl4_ecoli  |



|        |             |      |        |        |            |             |
|--------|-------------|------|--------|--------|------------|-------------|
| P0A6Y1 | IHFB_ECOLI  | *    | P0A6Y1 | P62399 | ihfb_ecoli | rl5_ecoli   |
| P0A6Y1 | IHFB_ECOLI  | *    | P0A6Y1 | P0A8T7 | ihfb_ecoli | rpoc_ecoli  |
| P0A6Y1 | IHFB_ECOLI  | *    | P0A6Y1 | P0A7S9 | ihfb_ecoli | rs13_ecoli  |
| P0A6Y1 | IHFB_ECOLI  | *    | P0A6Y1 | P0A7U3 | ihfb_ecoli | rs19_ecoli  |
| P0A6Y1 | IHFB_ECOLI  | *    | P0A6Y1 | P0A7V3 | ihfb_ecoli | rs3_ecoli   |
| P0A6Y1 | IHFB_ECOLI  | *    | P0A6Y1 | P0A7V8 | ihfb_ecoli | rs4_ecoli   |
| P0A6Y1 | IHFB_ECOLI  | *    | P0A6Y1 | P0A7W1 | ihfb_ecoli | rs5_ecoli   |
| P0A6Y1 | IHFB_ECOLI  | *    | P0A6Y1 | P02358 | ihfb_ecoli | rs6_ecoli   |
| P0A6Y1 | IHFB_ECOLI  | *    | P0A6Y1 | P02359 | ihfb_ecoli | rs7_ecoli   |
| P0A6Y1 | IHFB_ECOLI  | *    | P0A6Y1 | P0A7W7 | ihfb_ecoli | rs8_ecoli   |
| P0A6Y1 | IHFB_ECOLI  | *    | P0A6Y1 | P39160 | ihfb_ecoli | uxub_ecoli  |
| P0A6Y1 | IHFB_ECOLI  | *    | P0A6Y1 | P0AGK4 | ihfb_ecoli | yhby_ecoli  |
| P0A6Y1 | IHFB_ECOLI  | *    | P0A6Y1 | P0AF90 | ihfb_ecoli | yjgd_ecoli  |
| P0ADG7 | IMDH_ECOLI  | none |        |        |            |             |
| P11899 | IMMD_ECOLX  | *    | P11899 | P17998 | immd_ecoli | cead_ecolx  |
| P11899 | IMMD_ECOLX  | *    | P11899 | P17998 | immd_ecoli | cead_ecolx  |
| P07673 | INCC2_ECOLX | none |        |        |            |             |
| P39212 | INSN2_ECOLI | none |        |        |            |             |
| P37326 | INTS_ECOLI  | *    | P37326 | P0A978 | ints_ecoli | cspg_ecoli  |
| P37326 | INTS_ECOLI  | *    | P37326 | P0A9P0 | ints_ecoli | dldh_ecoli  |
| P37326 | INTS_ECOLI  | *    | P37326 | P06959 | ints_ecoli | odp2_ecoli  |
| P37326 | INTS_ECOLI  | *    | P37326 | P06959 | ints_ecoli | odp2_ecoli  |
| P0A7A9 | IPYR_ECOLI  | *    | P0A7A9 | P37623 | ipyr_ecoli | acpt_ecoli  |
| P0A7A9 | IPYR_ECOLI  | *    | P0A7A9 | P32705 | ipyr_ecoli | actp_ecoli  |
| P0A7A9 | IPYR_ECOLI  | *    | P0A7A9 | P76458 | ipyr_ecoli | atod_ecoli  |
| P0A7A9 | IPYR_ECOLI  | *    | P0A7A9 | P0A6F5 | ipyr_ecoli | ch60_ecoli  |
| P0A7A9 | IPYR_ECOLI  | *    | P0A7A9 | P0A6J5 | ipyr_ecoli | dada_ecoli  |
| P0A7A9 | IPYR_ECOLI  | *    | P0A7A9 | P39099 | ipyr_ecoli | degq_ecoli  |
| P0A7A9 | IPYR_ECOLI  | *    | P0A7A9 | P0A6Y8 | ipyr_ecoli | dnak_ecoli  |
| P0A7A9 | IPYR_ECOLI  | *    | P0A7A9 | P0A988 | ipyr_ecoli | dpo3b_ecoli |
| P0A7A9 | IPYR_ECOLI  | *    | P0A7A9 | P0CE47 | ipyr_ecoli | eftu1_ecoli |
| P0A7A9 | IPYR_ECOLI  | *    | P0A7A9 | P0ACB4 | ipyr_ecoli | hemg_ecoli  |
| P0A7A9 | IPYR_ECOLI  | *    | P0A7A9 | P67910 | ipyr_ecoli | hldd_ecoli  |
| P0A7A9 | IPYR_ECOLI  | *    | P0A7A9 | P13029 | ipyr_ecoli | katg_ecoli  |
| P0A7A9 | IPYR_ECOLI  | *    | P0A7A9 | P0A744 | ipyr_ecoli | msra_ecoli  |
| P0A7A9 | IPYR_ECOLI  | *    | P0A7A9 | P25888 | ipyr_ecoli | rhle_ecoli  |
| P0A7A9 | IPYR_ECOLI  | *    | P0A7A9 | P0A7J3 | ipyr_ecoli | rl10_ecoli  |
| P0A7A9 | IPYR_ECOLI  | *    | P0A7A9 | P0AA10 | ipyr_ecoli | rl13_ecoli  |
| P0A7A9 | IPYR_ECOLI  | *    | P0A7A9 | P0ADY3 | ipyr_ecoli | rl14_ecoli  |

|        |            |   |        |        |                            |                            |
|--------|------------|---|--------|--------|----------------------------|----------------------------|
| POA7A9 | IPYR_ECOLI | * | POA7A9 | P0A7K6 | <a href="#">ipyr_ecoli</a> | <a href="#">rl19_ecoli</a> |
| POA7A9 | IPYR_ECOLI | * | POA7A9 | P61175 | <a href="#">ipyr_ecoli</a> | <a href="#">rl22_ecoli</a> |
| POA7A9 | IPYR_ECOLI | * | POA7A9 | P0A7M2 | <a href="#">ipyr_ecoli</a> | <a href="#">rl28_ecoli</a> |
| POA7A9 | IPYR_ECOLI | * | POA7A9 | P60438 | <a href="#">ipyr_ecoli</a> | <a href="#">rl3_ecoli</a>  |
| POA7A9 | IPYR_ECOLI | * | POA7A9 | P60723 | <a href="#">ipyr_ecoli</a> | <a href="#">rl4_ecoli</a>  |
| POA7A9 | IPYR_ECOLI | * | POA7A9 | P60723 | <a href="#">ipyr_ecoli</a> | <a href="#">rl4_ecoli</a>  |
| POA7A9 | IPYR_ECOLI | * | POA7A9 | P0A7R1 | <a href="#">ipyr_ecoli</a> | <a href="#">rl9_ecoli</a>  |
| POA7A9 | IPYR_ECOLI | * | POA7A9 | P0A7R5 | <a href="#">ipyr_ecoli</a> | <a href="#">rs10_ecoli</a> |
| POA7A9 | IPYR_ECOLI | * | POA7A9 | P0AG59 | <a href="#">ipyr_ecoli</a> | <a href="#">rs14_ecoli</a> |
| POA7A9 | IPYR_ECOLI | * | POA7A9 | P0A7V0 | <a href="#">ipyr_ecoli</a> | <a href="#">rs2_ecoli</a>  |
| POA7A9 | IPYR_ECOLI | * | POA7A9 | P0A7U7 | <a href="#">ipyr_ecoli</a> | <a href="#">rs20_ecoli</a> |
| POA7A9 | IPYR_ECOLI | * | POA7A9 | P0A7V3 | <a href="#">ipyr_ecoli</a> | <a href="#">rs3_ecoli</a>  |
| POA7A9 | IPYR_ECOLI | * | POA7A9 | P0A7W1 | <a href="#">ipyr_ecoli</a> | <a href="#">rs5_ecoli</a>  |
| POA7A9 | IPYR_ECOLI | * | POA7A9 | P02359 | <a href="#">ipyr_ecoli</a> | <a href="#">rs7_ecoli</a>  |
| POA7A9 | IPYR_ECOLI | * | POA7A9 | P0A7W7 | <a href="#">ipyr_ecoli</a> | <a href="#">rs8_ecoli</a>  |
| POA7A9 | IPYR_ECOLI | * | POA7A9 | P0AG86 | <a href="#">ipyr_ecoli</a> | <a href="#">secb_ecoli</a> |
| POA7A9 | IPYR_ECOLI | * | POA7A9 | P0A9K9 | <a href="#">ipyr_ecoli</a> | <a href="#">slyd_ecoli</a> |
| POA7A9 | IPYR_ECOLI | * | POA7A9 | P0A850 | <a href="#">ipyr_ecoli</a> | <a href="#">tig_ecoli</a>  |
| POA7A9 | IPYR_ECOLI | * | POA7A9 | P0A850 | <a href="#">ipyr_ecoli</a> | <a href="#">tig_ecoli</a>  |
| POA7A9 | IPYR_ECOLI | * | POA7A9 | P75750 | <a href="#">ipyr_ecoli</a> | <a href="#">ybgq_ecoli</a> |
| POA7A9 | IPYR_ECOLI | * | POA7A9 | P0AF90 | <a href="#">ipyr_ecoli</a> | <a href="#">yjgd_ecoli</a> |
| POAAC8 | ISCA_ECOLI | * | POAAC8 | P0ABT2 | <a href="#">isca_ecoli</a> | <a href="#">dps_ecoli</a>  |
| POAAC8 | ISCA_ECOLI | * | POAAC8 | P0A9R4 | <a href="#">isca_ecoli</a> | <a href="#">fer_ecoli</a>  |
| POAAC8 | ISCA_ECOLI | * | POAAC8 | P0A9R4 | <a href="#">isca_ecoli</a> | <a href="#">fer_ecoli</a>  |
| POAAC8 | ISCA_ECOLI | * | POAAC8 | P0A744 | <a href="#">isca_ecoli</a> | <a href="#">msra_ecoli</a> |
| POAAC8 | ISCA_ECOLI | * | POAAC8 | P60422 | <a href="#">isca_ecoli</a> | <a href="#">rl2_ecoli</a>  |
| POA6B7 | ISCS_ECOLI | * | POA6B7 | P00722 | <a href="#">iscs_ecoli</a> | <a href="#">bgal_ecoli</a> |
| POA6B7 | ISCS_ECOLI | * | POA6B7 | P12999 | <a href="#">iscs_ecoli</a> | <a href="#">bioc_ecoli</a> |
| POA6B7 | ISCS_ECOLI | * | POA6B7 | P0A6Y8 | <a href="#">iscs_ecoli</a> | <a href="#">dnak_ecoli</a> |
| POA6B7 | ISCS_ECOLI | * | POA6B7 | P32177 | <a href="#">iscs_ecoli</a> | <a href="#">fdhd_ecoli</a> |
| POA6B7 | ISCS_ECOLI | * | POA6B7 | P0A6W5 | <a href="#">iscs_ecoli</a> | <a href="#">grea_ecoli</a> |
| POA6B7 | ISCS_ECOLI | * | POA6B7 | P10441 | <a href="#">iscs_ecoli</a> | <a href="#">lpxb_ecoli</a> |
| POA6B7 | ISCS_ECOLI | * | POA6B7 | P0AEZ7 | <a href="#">iscs_ecoli</a> | <a href="#">mltd_ecoli</a> |
| POA6B7 | ISCS_ECOLI | * | POA6B7 | P18843 | <a href="#">iscs_ecoli</a> | <a href="#">nade_ecoli</a> |
| POA6B7 | ISCS_ECOLI | * | POA6B7 | P0ABL5 | <a href="#">iscs_ecoli</a> | <a href="#">napc_ecoli</a> |
| POA6B7 | ISCS_ECOLI | * | POA6B7 | P0ACD4 | <a href="#">iscs_ecoli</a> | <a href="#">nifu_ecoli</a> |
| POA6B7 | ISCS_ECOLI | * | POA6B7 | P0ACD4 | <a href="#">iscs_ecoli</a> | <a href="#">nifu_ecoli</a> |
| POA6B7 | ISCS_ECOLI | * | POA6B7 | P0ACD4 | <a href="#">iscs_ecoli</a> | <a href="#">nifu_ecoli</a> |
| POA6B7 | ISCS_ECOLI | * | POA6B7 | P75960 | <a href="#">iscs_ecoli</a> | <a href="#">npd_ecoli</a>  |
| POA6B7 | ISCS_ECOLI | * | POA6B7 | P0A7X3 | <a href="#">iscs_ecoli</a> | <a href="#">rs9_ecoli</a>  |
| POA6B7 | ISCS_ECOLI | * | POA6B7 | P0A890 | <a href="#">iscs_ecoli</a> | <a href="#">tusa_ecoli</a> |
| POA6B7 | ISCS_ECOLI | * | POA6B7 | P52645 | <a href="#">iscs_ecoli</a> | <a href="#">ydbh_ecoli</a> |
| Q46893 | ISPD_ECOLI |   | none   |        |                            |                            |

|        |             |          |        |             |             |
|--------|-------------|----------|--------|-------------|-------------|
| P62617 | ISPF_ECOLI  | * P62617 | P0AE58 | ispf_ecoli  | caif_ecoli  |
| P62617 | ISPF_ECOLI  | * P62617 | P75936 | ispf_ecoli  | flgd_ecoli  |
| P62617 | ISPF_ECOLI  | * P62615 | P17169 | ispe_ecoli  | glms_ecoli  |
| P62617 | ISPF_ECOLI  | * P62617 | P67910 | ispf_ecoli  | hldd_ecoli  |
| P62617 | ISPF_ECOLI  | * P62617 | P0A7R5 | ispf_ecoli  | rs10_ecoli  |
| P62617 | ISPF_ECOLI  | * P62617 | P0A7V8 | ispf_ecoli  | rs4_ecoli   |
| P62617 | ISPF_ECOLI  | * P62617 | P64570 | ispf_ecoli  | yqgc_ecoli  |
| P14542 | IUTA_ECOLX  | none     |        |             |             |
| P0AD59 | IVY_ECOLI   | none     |        |             |             |
| P0AEW9 | K1PF_ECOLI  | * P0AEW9 | P69811 | k1pf_ecoli  | ptfah_ecoli |
| P0AEW9 | K1PF_ECOLI  | * P0AEW9 | P42598 | k1pf_ecoli  | ygjq_ecoli  |
| P0A796 | K6PF1_ECOLI | * P0A796 | P0A6E4 | k6pf1_ecoli | assy_ecoli  |
| P0A796 | K6PF1_ECOLI | * P0A796 | P28861 | k6pf1_ecoli | fenr_ecoli  |
| P0A796 | K6PF1_ECOLI | * P0A796 | P21889 | k6pf1_ecoli | syd_ecoli   |
| P0A796 | K6PF1_ECOLI | * P0A796 | P0A858 | k6pf1_ecoli | tpis_ecoli  |
| P69441 | KAD_ECOLI   | * P69441 | P03960 | kad_ecoli   | atkb_ecoli  |
| P69441 | KAD_ECOLI   | * P69441 | P25748 | kad_ecoli   | gals_ecoli  |
| P69441 | KAD_ECOLI   | * P69441 | P0A6Z3 | kad_ecoli   | htpg_ecoli  |
| P69441 | KAD_ECOLI   | * P69441 | P0A8T7 | kad_ecoli   | rpoc_ecoli  |
| P69441 | KAD_ECOLI   | * P69441 | P77806 | kad_ecoli   | ybdl_ecoli  |
| P13029 | KATG_ECOLI  | * P13029 | P26266 | katg_ecoli  | fepe_ecoli  |
| P13029 | KATG_ECOLI  | * P13029 | P77569 | katg_ecoli  | mhpr_ecoli  |
| P13029 | KATG_ECOLI  | * P13029 | P18843 | katg_ecoli  | nade_ecoli  |
| P13029 | KATG_ECOLI  | * P13029 | P0ACU0 | katg_ecoli  | ybih_ecoli  |
| P0AB77 | KBL_ECOLI   | * P0AB77 | P0A6F5 | kbl_ecoli   | ch60_ecoli  |
| P0AB77 | KBL_ECOLI   | * P0AB77 | P0A7A7 | kbl_ecoli   | plsb_ecoli  |
| P0AB77 | KBL_ECOLI   | * P0AB77 | P60723 | kbl_ecoli   | rl4_ecoli   |
| P0AB77 | KBL_ECOLI   | * P0AB77 | P07913 | kbl_ecoli   | tdh_ecoli   |
| P04951 | KDSB_ECOLI  | * P04951 | P0ACF4 | kdsb_ecoli  | dbhb_ecoli  |
| P04951 | KDSB_ECOLI  | * P04951 | P0AD01 | kdsb_ecoli  | dcur_ecoli  |
| P04951 | KDSB_ECOLI  | * P04951 | P0AC41 | kdsb_ecoli  | dhsa_ecoli  |
| P04951 | KDSB_ECOLI  | * P04951 | P08622 | kdsb_ecoli  | dnaj_ecoli  |
| P04951 | KDSB_ECOLI  | * P04951 | P0A6Y8 | kdsb_ecoli  | dnak_ecoli  |
| P04951 | KDSB_ECOLI  | * P04951 | P0CE47 | kdsb_ecoli  | eftu1_ecoli |
| P04951 | KDSB_ECOLI  | * P04951 | P18843 | kdsb_ecoli  | nade_ecoli  |
| P04951 | KDSB_ECOLI  | * P04951 | P37095 | kdsb_ecoli  | pepb_ecoli  |

|        |             |      |        |        |             |            |
|--------|-------------|------|--------|--------|-------------|------------|
| P04951 | KDSB_ECOLI  | *    | P04951 | P0A7J7 | kdsb_ecoli  | rl11_ecoli |
| P04951 | KDSB_ECOLI  | *    | P04951 | P60723 | kdsb_ecoli  | rl4_ecoli  |
| P04951 | KDSB_ECOLI  | *    | P04951 | P0A7K2 | kdsb_ecoli  | rl7_ecoli  |
| P04951 | KDSB_ECOLI  | *    | P04951 | P0AG67 | kdsb_ecoli  | rs1_ecoli  |
| P04951 | KDSB_ECOLI  | *    | P04951 | P0AFU2 | kdsb_ecoli  | yfbs_ecoli |
| P04951 | KDSB_ECOLI  | *    | P04951 | P32681 | kdsb_ecoli  | yjah_ecoli |
| P0ABZ4 | KDSC_ECOLI  | *    | P0ABZ4 | P0A7A7 | kdsc_ecoli  | plsb_ecoli |
| P0ABZ4 | KDSC_ECOLI  | *    | P0ABZ4 | P0AAH8 | kdsc_ecoli  | sapf_ecoli |
| P77338 | KEFA_ECOLI  | none |        |        |             |            |
| P60546 | KGUA_ECOLI  | *    | P60546 | P05793 | kgua_ecoli  | ilvc_ecoli |
| P60546 | KGUA_ECOLI  | *    | P60546 | P0ADY7 | kgua_ecoli  | rl16_ecoli |
| P60546 | KGUA_ECOLI  | *    | P60546 | P0A7X3 | kgua_ecoli  | rs9_ecoli  |
| P60546 | KGUA_ECOLI  | *    | P60546 | P77698 | kgua_ecoli  | ybck_ecoli |
| P60546 | KGUA_ECOLI  | *    | P60546 | P28916 | kgua_ecoli  | ybfd_ecoli |
| P00547 | KHSE_ECOLI  | *    | P00547 | P0A6F5 | khse_ecoli  | ch60_ecoli |
| P00547 | KHSE_ECOLI  | *    | P00547 | P13035 | khse_ecoli  | glpd_ecoli |
| Q52328 | KLAB_ECOLX  | none |        |        |             |            |
| Q52313 | KORB1_ECOLX | none |        |        |             |            |
| P0A717 | KPRS_ECOLI  | *    | P0A717 | P0A6F5 | kprs_ecoli  | ch60_ecoli |
| P0A717 | KPRS_ECOLI  | *    | P0A717 | P0A9J6 | kprs_ecoli  | rbsk_ecoli |
| P0AD61 | KPYK1_ECOLI | *    | P0AD61 | P00936 | kpyk1_ecoli | cyaa_ecoli |
| P0AD61 | KPYK1_ECOLI | *    | P0AD61 | P0ABP8 | kpyk1_ecoli | deod_ecoli |
| P0AD61 | KPYK1_ECOLI | *    | P0AD61 | P0A6Y8 | kpyk1_ecoli | dnak_ecoli |
| P0AD61 | KPYK1_ECOLI | *    | P0AD61 | P75882 | kpyk1_ecoli | gfcd_ecoli |
| P0AD61 | KPYK1_ECOLI | *    | P0AD61 | P0A717 | kpyk1_ecoli | kprs_ecoli |
| P0AD61 | KPYK1_ECOLI | *    | P0AD61 | P31554 | kpyk1_ecoli | lptd_ecoli |
| P0AD61 | KPYK1_ECOLI | *    | P0AD61 | P69741 | kpyk1_ecoli | mbht_ecoli |
| P0AD61 | KPYK1_ECOLI | *    | P0AD61 | P18843 | kpyk1_ecoli | nade_ecoli |
| P0AD61 | KPYK1_ECOLI | *    | P0AD61 | P09373 | kpyk1_ecoli | pflb_ecoli |
| P0AD61 | KPYK1_ECOLI | *    | P0AD61 | P0ACQ0 | kpyk1_ecoli | rbsr_ecoli |
| P0AD61 | KPYK1_ECOLI | *    | P0AD61 | P75869 | kpyk1_ecoli | sxy_ecoli  |
| P0AD61 | KPYK1_ECOLI | *    | P0AD61 | P0AGJ9 | kpyk1_ecoli | syy_ecoli  |
| P0AD61 | KPYK1_ECOLI | *    | P0AD61 | P63389 | kpyk1_ecoli | yhes_ecoli |
| P0AD61 | KPYK1_ECOLI | *    | P0AD61 | P32701 | kpyk1_ecoli | yjcc_ecoli |
| P0AD61 | KPYK1_ECOLI | *    | P0AD61 | P42914 | kpyk1_ecoli | yrai_ecoli |
| P21599 | KPYK2_ECOLI | *    | P21599 | P0A6Y8 | kpyk2_ecoli | dnak_ecoli |

|        |             |   |        |        |             |             |
|--------|-------------|---|--------|--------|-------------|-------------|
| P21599 | KPYK2_ECOLI | * | P21599 | P06971 | kpyk2_ecoli | fhua_ecoli  |
| P21599 | KPYK2_ECOLI | * | P21599 | P0ADH5 | kpyk2_ecoli | fimb_ecoli  |
| P21599 | KPYK2_ECOLI | * | P21599 | P23930 | kpyk2_ecoli | Int_ecoli   |
| P21599 | KPYK2_ECOLI | * | P21599 | P23909 | kpyk2_ecoli | mutS_ecoli  |
| P21599 | KPYK2_ECOLI | * | P21599 | P31678 | kpyk2_ecoli | otsb_ecoli  |
| P21599 | KPYK2_ECOLI | * | P21599 | P09373 | kpyk2_ecoli | pflb_ecoli  |
| P21599 | KPYK2_ECOLI | * | P21599 | P0A7B1 | kpyk2_ecoli | ppk_ecoli   |
| P21599 | KPYK2_ECOLI | * | P21599 | P19642 | kpyk2_ecoli | ptocb_ecoli |
| P21599 | KPYK2_ECOLI | * | P21599 | P0A8M3 | kpyk2_ecoli | syt_ecoli   |
| P21599 | KPYK2_ECOLI | * | P21599 | P0A850 | kpyk2_ecoli | tig_ecoli   |
| P21599 | KPYK2_ECOLI | * | P21599 | P0A850 | kpyk2_ecoli | tig_ecoli   |
| P21599 | KPYK2_ECOLI | * | P21599 | P52052 | kpyk2_ecoli | yggr_ecoli  |
|        |             |   |        |        |             |             |
| P52643 | LDHD_ECOLI  | * | P52643 | P18843 | ldhd_ecoli  | nade_ecoli  |
| P52643 | LDHD_ECOLI  | * | P52643 | P0AED5 | ldhd_ecoli  | uvry_ecoli  |
| P52643 | LDHD_ECOLI  | * | P52643 | P52125 | ldhd_ecoli  | yfjj_ecoli  |
|        |             |   |        |        |             |             |
| P00803 | LEP_ECOLI   | * | P00803 | P00803 | lep_ecoli   | lep_ecoli   |
|        |             |   |        |        |             |             |
| P60785 | LEPA_ECOLI  | * | P60785 | P0A6C5 | lepa_ecoli  | arga_ecoli  |
| P60785 | LEPA_ECOLI  | * | P60785 | P0AEW1 | lepa_ecoli  | hyfe_ecoli  |
| P60785 | LEPA_ECOLI  | * | P60785 | P75830 | lepa_ecoli  | maca_ecoli  |
| P60785 | LEPA_ECOLI  | * | P60785 | P33025 | lepa_ecoli  | psug_ecoli  |
| P60785 | LEPA_ECOLI  | * | P60785 | P76037 | lepa_ecoli  | puup_ecoli  |
| P60785 | LEPA_ECOLI  | * | P60785 | P15032 | lepa_ecoli  | rece_ecoli  |
| P60785 | LEPA_ECOLI  | * | P60785 | P0AA10 | lepa_ecoli  | rl13_ecoli  |
| P60785 | LEPA_ECOLI  | * | P60785 | P61175 | lepa_ecoli  | rl22_ecoli  |
| P60785 | LEPA_ECOLI  | * | P60785 | P60624 | lepa_ecoli  | rl24_ecoli  |
| P60785 | LEPA_ECOLI  | * | P60785 | P60723 | lepa_ecoli  | rl4_ecoli   |
| P60785 | LEPA_ECOLI  | * | P60785 | P0A7R1 | lepa_ecoli  | rl9_ecoli   |
| P60785 | LEPA_ECOLI  | * | P60785 | P0A7R5 | lepa_ecoli  | rs10_ecoli  |
| P60785 | LEPA_ECOLI  | * | P60785 | P0A7V0 | lepa_ecoli  | rs2_ecoli   |
| P60785 | LEPA_ECOLI  | * | P60785 | P0A7W1 | lepa_ecoli  | rs5_ecoli   |
| P60785 | LEPA_ECOLI  | * | P60785 | P02358 | lepa_ecoli  | rs6_ecoli   |
| P60785 | LEPA_ECOLI  | * | P60785 | P02359 | lepa_ecoli  | rs7_ecoli   |
| P60785 | LEPA_ECOLI  | * | P60785 | P0ADM6 | lepa_ecoli  | yidx_ecoli  |
| P60785 | LEPA_ECOLI  | * | P60785 | P64423 | lepa_ecoli  | zntb_ecoli  |
|        |             |   |        |        |             |             |
| P60716 | LIPA_ECOLI  | * | P60716 | P0A6F5 | lipa_ecoli  | ch60_ecoli  |
| P60716 | LIPA_ECOLI  | * | P60716 | P0A6Y8 | lipa_ecoli  | dnak_ecoli  |
| P60716 | LIPA_ECOLI  | * | P60716 | P22256 | lipa_ecoli  | gabt_ecoli  |
| P60716 | LIPA_ECOLI  | * | P60716 | P18843 | lipa_ecoli  | nade_ecoli  |
| P60716 | LIPA_ECOLI  | * | P60716 | P0A843 | lipa_ecoli  | tate_ecoli  |
| P60716 | LIPA_ECOLI  | * | P60716 | P0A9T6 | lipa_ecoli  | ybaq_ecoli  |
| P60716 | LIPA_ECOLI  | * | P60716 | P0ADK8 | lipa_ecoli  | yibl_ecoli  |

|        |            |          |        |            |             |
|--------|------------|----------|--------|------------|-------------|
| P33232 | LLDD_ECOLI | * P33232 | P0A6F5 | lidd_ecoli | ch60_ecoli  |
| P33232 | LLDD_ECOLI | * P33232 | P67910 | lidd_ecoli | hlidd_ecoli |
| P33232 | LLDD_ECOLI | * P33232 | P03837 | lidd_ecoli | insh_ecoli  |
| P33232 | LLDD_ECOLI | * P33232 | P03837 | lidd_ecoli | insh_ecoli  |
| P33232 | LLDD_ECOLI | * P33232 | P0AFB8 | lidd_ecoli | ntrc_ecoli  |
| P33232 | LLDD_ECOLI | * P33232 | P61175 | lidd_ecoli | rl22_ecoli  |
| P33232 | LLDD_ECOLI | * P33232 | P0A7M2 | lidd_ecoli | rl28_ecoli  |
| P33232 | LLDD_ECOLI | * P33232 | P0A7V0 | lidd_ecoli | rs2_ecoli   |
| P33232 | LLDD_ECOLI | * P33232 | P0A7V8 | lidd_ecoli | rs4_ecoli   |
| P33232 | LLDD_ECOLI | * P33232 | P00960 | lidd_ecoli | syga_ecoli  |
| P33232 | LLDD_ECOLI | * P33232 | P25531 | lidd_ecoli | yicr_ecoli  |
| P0A9M0 | LON_ECOLI  | * P0A9M0 | P03004 | lon_ecoli  | dnaa_ecoli  |
| P0A9M0 | LON_ECOLI  | * P0A9M0 | P06710 | lon_ecoli  | dpo3x_ecoli |
| P0A9M0 | LON_ECOLI  | * P0A9M0 | P0CE47 | lon_ecoli  | eftu1_ecoli |
| P0A9M0 | LON_ECOLI  | * P0A9M0 | P78055 | lon_ecoli  | fsaa_ecoli  |
| P0A9M0 | LON_ECOLI  | * P0A9M0 | P18843 | lon_ecoli  | nade_ecoli  |
| P0A9M0 | LON_ECOLI  | * P0A9M0 | P0AA10 | lon_ecoli  | rl13_ecoli  |
| P0A9M0 | LON_ECOLI  | * P0A9M0 | P0AA10 | lon_ecoli  | rl13_ecoli  |
| P0A9M0 | LON_ECOLI  | * P0A9M0 | P0A7L3 | lon_ecoli  | rl20_ecoli  |
| P0A9M0 | LON_ECOLI  | * P0A9M0 | P0AG48 | lon_ecoli  | rl21_ecoli  |
| P0A9M0 | LON_ECOLI  | * P0A9M0 | P61175 | lon_ecoli  | rl22_ecoli  |
| P0A9M0 | LON_ECOLI  | * P0A9M0 | P60438 | lon_ecoli  | rl3_ecoli   |
| P0A9M0 | LON_ECOLI  | * P0A9M0 | P0A7R1 | lon_ecoli  | rl9_ecoli   |
| P0A9M0 | LON_ECOLI  | * P0A9M0 | P0A7R1 | lon_ecoli  | rl9_ecoli   |
| P0A9M0 | LON_ECOLI  | * P0A9M0 | P0A7V0 | lon_ecoli  | rs2_ecoli   |
| P0A9M0 | LON_ECOLI  | * P0A9M0 | P0A7V3 | lon_ecoli  | rs3_ecoli   |
| P0A9M0 | LON_ECOLI  | * P0A9M0 | P02359 | lon_ecoli  | rs7_ecoli   |
| P0A9M0 | LON_ECOLI  | * P0A9M0 | P0A7W7 | lon_ecoli  | rs8_ecoli   |
| P0A9M0 | LON_ECOLI  | * P0A9M0 | P0AAH8 | lon_ecoli  | sapf_ecoli  |
| P0A9M0 | LON_ECOLI  | * P0A9M0 | P0AG86 | lon_ecoli  | secb_ecoli  |
| P0A9M0 | LON_ECOLI  | * P0A9M0 | P28043 | lon_ecoli  | ssb2_ecolx  |
| P0A9M0 | LON_ECOLI  | * P0A9M0 | P39336 | lon_ecoli  | yjgl_ecoli  |
| P75867 | LONH_ECOLI | none     |        |            |             |
| P69776 | LPP_ECOLI  | * P69776 | P61316 | lpp_ecoli  | lola_ecoli  |
| P69776 | LPP_ECOLI  | * P69776 | P69776 | lpp_ecoli  | lpp_ecoli   |
| P0A722 | LPXA_ECOLI | * P0A722 | P25516 | lpxa_ecoli | acon1_ecoli |
| P0A722 | LPXA_ECOLI | * P0A722 | P06972 | lpxa_ecoli | fhub_ecoli  |
| P0A722 | LPXA_ECOLI | * P0A722 | P0AAI3 | lpxa_ecoli | ftsh_ecoli  |
| P0A722 | LPXA_ECOLI | * P0A722 | P0A9A9 | lpxa_ecoli | fur_ecoli   |
| P0A722 | LPXA_ECOLI | * P0A722 | P0CI31 | lpxa_ecoli | hcab_ecoli  |



|        |            |   |        |        |                            |                             |
|--------|------------|---|--------|--------|----------------------------|-----------------------------|
| POA722 | LPXA_ECOLI | * | POA722 | P0A6X3 | <a href="#">lpxa_ecoli</a> | <a href="#">hfq_ecoli</a>   |
| POA722 | LPXA_ECOLI | * | POA722 | P0AEZ7 | <a href="#">lpxa_ecoli</a> | <a href="#">mltd_ecoli</a>  |
| POA722 | LPXA_ECOLI | * | POA722 | P0A772 | <a href="#">lpxa_ecoli</a> | <a href="#">nrdd_ecoli</a>  |
| POA722 | LPXA_ECOLI | * | POA722 | Q46920 | <a href="#">lpxa_ecoli</a> | <a href="#">quef_ecoli</a>  |
| POA722 | LPXA_ECOLI | * | POA722 | P0A7J0 | <a href="#">lpxa_ecoli</a> | <a href="#">ribb_ecoli</a>  |
| POA722 | LPXA_ECOLI | * | POA722 | P0A7J3 | <a href="#">lpxa_ecoli</a> | <a href="#">rl10_ecoli</a>  |
| POA722 | LPXA_ECOLI | * | POA722 | P0AA10 | <a href="#">lpxa_ecoli</a> | <a href="#">rl13_ecoli</a>  |
| POA722 | LPXA_ECOLI | * | POA722 | P0ADY3 | <a href="#">lpxa_ecoli</a> | <a href="#">rl14_ecoli</a>  |
| POA722 | LPXA_ECOLI | * | POA722 | P02413 | <a href="#">lpxa_ecoli</a> | <a href="#">rl15_ecoli</a>  |
| POA722 | LPXA_ECOLI | * | POA722 | P0AG44 | <a href="#">lpxa_ecoli</a> | <a href="#">rl17_ecoli</a>  |
| POA722 | LPXA_ECOLI | * | POA722 | P0A7L3 | <a href="#">lpxa_ecoli</a> | <a href="#">rl20_ecoli</a>  |
| POA722 | LPXA_ECOLI | * | POA722 | P0AG48 | <a href="#">lpxa_ecoli</a> | <a href="#">rl21_ecoli</a>  |
| POA722 | LPXA_ECOLI | * | POA722 | P61175 | <a href="#">lpxa_ecoli</a> | <a href="#">rl22_ecoli</a>  |
| POA722 | LPXA_ECOLI | * | POA722 | P60624 | <a href="#">lpxa_ecoli</a> | <a href="#">rl24_ecoli</a>  |
| POA722 | LPXA_ECOLI | * | POA722 | P0A7M2 | <a href="#">lpxa_ecoli</a> | <a href="#">rl28_ecoli</a>  |
| POA722 | LPXA_ECOLI | * | POA722 | P60438 | <a href="#">lpxa_ecoli</a> | <a href="#">rl3_ecoli</a>   |
| POA722 | LPXA_ECOLI | * | POA722 | P0A7N9 | <a href="#">lpxa_ecoli</a> | <a href="#">rl33_ecoli</a>  |
| POA722 | LPXA_ECOLI | * | POA722 | P0AG55 | <a href="#">lpxa_ecoli</a> | <a href="#">rl6_ecoli</a>   |
| POA722 | LPXA_ECOLI | * | POA722 | P0AG55 | <a href="#">lpxa_ecoli</a> | <a href="#">rl6_ecoli</a>   |
| POA722 | LPXA_ECOLI | * | POA722 | P0A7K2 | <a href="#">lpxa_ecoli</a> | <a href="#">rl7_ecoli</a>   |
| POA722 | LPXA_ECOLI | * | POA722 | P0A7R5 | <a href="#">lpxa_ecoli</a> | <a href="#">rs10_ecoli</a>  |
| POA722 | LPXA_ECOLI | * | POA722 | P0A7V0 | <a href="#">lpxa_ecoli</a> | <a href="#">rs2_ecoli</a>   |
| POA722 | LPXA_ECOLI | * | POA722 | P0A7U7 | <a href="#">lpxa_ecoli</a> | <a href="#">rs20_ecoli</a>  |
| POA722 | LPXA_ECOLI | * | POA722 | P0A7V8 | <a href="#">lpxa_ecoli</a> | <a href="#">rs4_ecoli</a>   |
| POA722 | LPXA_ECOLI | * | POA722 | P0A7X3 | <a href="#">lpxa_ecoli</a> | <a href="#">rs9_ecoli</a>   |
| POA722 | LPXA_ECOLI | * | POA722 | P04693 | <a href="#">lpxa_ecoli</a> | <a href="#">tyrb_ecoli</a>  |
| POA722 | LPXA_ECOLI | * | POA722 | P08245 | <a href="#">lpxa_ecoli</a> | <a href="#">ycih_ecoli</a>  |
| POA722 | LPXA_ECOLI | * | POA722 | P77781 | <a href="#">lpxa_ecoli</a> | <a href="#">ydiy_ecoli</a>  |
| POA722 | LPXA_ECOLI | * | POA722 | P0ADK8 | <a href="#">lpxa_ecoli</a> | <a href="#">yibl_ecoli</a>  |
|        |            |   |        |        |                            |                             |
| P10441 | LPXB_ECOLI | * | P10441 | P0A6F5 | <a href="#">lpxb_ecoli</a> | <a href="#">ch60_ecoli</a>  |
| P10441 | LPXB_ECOLI | * | P10441 | P0A6J5 | <a href="#">lpxb_ecoli</a> | <a href="#">dada_ecoli</a>  |
| P10441 | LPXB_ECOLI | * | P10441 | P0AC41 | <a href="#">lpxb_ecoli</a> | <a href="#">dhsa_ecoli</a>  |
| P10441 | LPXB_ECOLI | * | P10441 | P08622 | <a href="#">lpxb_ecoli</a> | <a href="#">dnaj_ecoli</a>  |
| P10441 | LPXB_ECOLI | * | P10441 | P0CE47 | <a href="#">lpxb_ecoli</a> | <a href="#">eftu1_ecoli</a> |
| P10441 | LPXB_ECOLI | * | P10441 | P0CE47 | <a href="#">lpxb_ecoli</a> | <a href="#">eftu1_ecoli</a> |
| P10441 | LPXB_ECOLI | * | P10441 | P0A9A9 | <a href="#">lpxb_ecoli</a> | <a href="#">fur_ecoli</a>   |
| P10441 | LPXB_ECOLI | * | P10441 | P13035 | <a href="#">lpxb_ecoli</a> | <a href="#">glpd_ecoli</a>  |
| P10441 | LPXB_ECOLI | * | P10441 | P0A717 | <a href="#">lpxb_ecoli</a> | <a href="#">kprs_ecoli</a>  |
| P10441 | LPXB_ECOLI | * | P10441 | P0A9X4 | <a href="#">lpxb_ecoli</a> | <a href="#">mreb_ecoli</a>  |
| P10441 | LPXB_ECOLI | * | P10441 | P23538 | <a href="#">lpxb_ecoli</a> | <a href="#">ppsa_ecoli</a>  |
| P10441 | LPXB_ECOLI | * | P10441 | P0A7J3 | <a href="#">lpxb_ecoli</a> | <a href="#">rl10_ecoli</a>  |
| P10441 | LPXB_ECOLI | * | P10441 | P0AA10 | <a href="#">lpxb_ecoli</a> | <a href="#">rl13_ecoli</a>  |
| P10441 | LPXB_ECOLI | * | P10441 | P0A7K6 | <a href="#">lpxb_ecoli</a> | <a href="#">rl19_ecoli</a>  |
| P10441 | LPXB_ECOLI | * | P10441 | P0A7V0 | <a href="#">lpxb_ecoli</a> | <a href="#">rs2_ecoli</a>   |

|        |            |   |        |        |                            |                            |
|--------|------------|---|--------|--------|----------------------------|----------------------------|
| P10441 | LPXB_ECOLI | * | P10441 | P33226 | <a href="#">lpxb_ecoli</a> | <a href="#">torc_ecoli</a> |
| P10441 | LPXB_ECOLI | * | P10441 | P60932 | <a href="#">lpxb_ecoli</a> | <a href="#">uppp_ecoli</a> |
| P10441 | LPXB_ECOLI | * | P10441 | P39177 | <a href="#">lpxb_ecoli</a> | <a href="#">uspg_ecoli</a> |
| P21645 | LPXD_ECOLI | * | P21645 | P0AAE5 | <a href="#">lpxd_ecoli</a> | <a href="#">arcd_ecoli</a> |
| P21645 | LPXD_ECOLI | * | P21645 | P0AC38 | <a href="#">lpxd_ecoli</a> | <a href="#">aspa_ecoli</a> |
| P21645 | LPXD_ECOLI | * | P21645 | P36659 | <a href="#">lpxd_ecoli</a> | <a href="#">cbpa_ecoli</a> |
| P21645 | LPXD_ECOLI | * | P21645 | P36659 | <a href="#">lpxd_ecoli</a> | <a href="#">cbpa_ecoli</a> |
| P21645 | LPXD_ECOLI | * | P21645 | P0ABL8 | <a href="#">lpxd_ecoli</a> | <a href="#">ccmb_ecoli</a> |
| P21645 | LPXD_ECOLI | * | P21645 | Q46925 | <a href="#">lpxd_ecoli</a> | <a href="#">csda_ecoli</a> |
| P21645 | LPXD_ECOLI | * | P21645 | P0AC41 | <a href="#">lpxd_ecoli</a> | <a href="#">dhsa_ecoli</a> |
| P21645 | LPXD_ECOLI | * | P21645 | P08622 | <a href="#">lpxd_ecoli</a> | <a href="#">dnaj_ecoli</a> |
| P21645 | LPXD_ECOLI | * | P21645 | P67910 | <a href="#">lpxd_ecoli</a> | <a href="#">hidd_ecoli</a> |
| P21645 | LPXD_ECOLI | * | P21645 | P0A722 | <a href="#">lpxd_ecoli</a> | <a href="#">lpxa_ecoli</a> |
| P21645 | LPXD_ECOLI | * | P21645 | P0AFJ1 | <a href="#">lpxd_ecoli</a> | <a href="#">phna_ecoli</a> |
| P21645 | LPXD_ECOLI | * | P21645 | P23830 | <a href="#">lpxd_ecoli</a> | <a href="#">pss_ecoli</a>  |
| P21645 | LPXD_ECOLI | * | P21645 | P0AG30 | <a href="#">lpxd_ecoli</a> | <a href="#">rho_ecoli</a>  |
| P21645 | LPXD_ECOLI | * | P21645 | P0A7L0 | <a href="#">lpxd_ecoli</a> | <a href="#">rl1_ecoli</a>  |
| P21645 | LPXD_ECOLI | * | P21645 | P0A7J7 | <a href="#">lpxd_ecoli</a> | <a href="#">rl11_ecoli</a> |
| P21645 | LPXD_ECOLI | * | P21645 | P0AA10 | <a href="#">lpxd_ecoli</a> | <a href="#">rl13_ecoli</a> |
| P21645 | LPXD_ECOLI | * | P21645 | P02413 | <a href="#">lpxd_ecoli</a> | <a href="#">rl15_ecoli</a> |
| P21645 | LPXD_ECOLI | * | P21645 | P02413 | <a href="#">lpxd_ecoli</a> | <a href="#">rl15_ecoli</a> |
| P21645 | LPXD_ECOLI | * | P21645 | P0ADY7 | <a href="#">lpxd_ecoli</a> | <a href="#">rl16_ecoli</a> |
| P21645 | LPXD_ECOLI | * | P21645 | P0C018 | <a href="#">lpxd_ecoli</a> | <a href="#">rl18_ecoli</a> |
| P21645 | LPXD_ECOLI | * | P21645 | P0A7K6 | <a href="#">lpxd_ecoli</a> | <a href="#">rl19_ecoli</a> |
| P21645 | LPXD_ECOLI | * | P21645 | P60422 | <a href="#">lpxd_ecoli</a> | <a href="#">rl2_ecoli</a>  |
| P21645 | LPXD_ECOLI | * | P21645 | P60422 | <a href="#">lpxd_ecoli</a> | <a href="#">rl2_ecoli</a>  |
| P21645 | LPXD_ECOLI | * | P21645 | P0A7L3 | <a href="#">lpxd_ecoli</a> | <a href="#">rl20_ecoli</a> |
| P21645 | LPXD_ECOLI | * | P21645 | P0AG48 | <a href="#">lpxd_ecoli</a> | <a href="#">rl21_ecoli</a> |
| P21645 | LPXD_ECOLI | * | P21645 | P0AG48 | <a href="#">lpxd_ecoli</a> | <a href="#">rl21_ecoli</a> |
| P21645 | LPXD_ECOLI | * | P21645 | P61175 | <a href="#">lpxd_ecoli</a> | <a href="#">rl22_ecoli</a> |
| P21645 | LPXD_ECOLI | * | P21645 | P60624 | <a href="#">lpxd_ecoli</a> | <a href="#">rl24_ecoli</a> |
| P21645 | LPXD_ECOLI | * | P21645 | P60438 | <a href="#">lpxd_ecoli</a> | <a href="#">rl3_ecoli</a>  |
| P21645 | LPXD_ECOLI | * | P21645 | P0A7N9 | <a href="#">lpxd_ecoli</a> | <a href="#">rl33_ecoli</a> |
| P21645 | LPXD_ECOLI | * | P21645 | P60723 | <a href="#">lpxd_ecoli</a> | <a href="#">rl4_ecoli</a>  |
| P21645 | LPXD_ECOLI | * | P21645 | P60723 | <a href="#">lpxd_ecoli</a> | <a href="#">rl4_ecoli</a>  |
| P21645 | LPXD_ECOLI | * | P21645 | P60723 | <a href="#">lpxd_ecoli</a> | <a href="#">rl4_ecoli</a>  |
| P21645 | LPXD_ECOLI | * | P21645 | P0A7K2 | <a href="#">lpxd_ecoli</a> | <a href="#">rl7_ecoli</a>  |
| P21645 | LPXD_ECOLI | * | P21645 | P0A7R1 | <a href="#">lpxd_ecoli</a> | <a href="#">rl9_ecoli</a>  |
| P21645 | LPXD_ECOLI | * | P21645 | P0A7R1 | <a href="#">lpxd_ecoli</a> | <a href="#">rl9_ecoli</a>  |
| P21645 | LPXD_ECOLI | * | P21645 | P75864 | <a href="#">lpxd_ecoli</a> | <a href="#">rlml_ecoli</a> |
| P21645 | LPXD_ECOLI | * | P21645 | P37765 | <a href="#">lpxd_ecoli</a> | <a href="#">rlub_ecoli</a> |
| P21645 | LPXD_ECOLI | * | P21645 | P0AFW4 | <a href="#">lpxd_ecoli</a> | <a href="#">rnk_ecoli</a>  |
| P21645 | LPXD_ECOLI | * | P21645 | P0A8T7 | <a href="#">lpxd_ecoli</a> | <a href="#">rpoc_ecoli</a> |
| P21645 | LPXD_ECOLI | * | P21645 | P0A7R5 | <a href="#">lpxd_ecoli</a> | <a href="#">rs10_ecoli</a> |

|        |            |      |        |        |                            |                            |
|--------|------------|------|--------|--------|----------------------------|----------------------------|
| P21645 | LPXD_ECOLI | *    | P21645 | P0A7S9 | <a href="#">lpxd_ecoli</a> | <a href="#">rs13_ecoli</a> |
| P21645 | LPXD_ECOLI | *    | P21645 | P0A7T3 | <a href="#">lpxd_ecoli</a> | <a href="#">rs16_ecoli</a> |
| P21645 | LPXD_ECOLI | *    | P21645 | P0A7T7 | <a href="#">lpxd_ecoli</a> | <a href="#">rs18_ecoli</a> |
| P21645 | LPXD_ECOLI | *    | P21645 | P0A7T7 | <a href="#">lpxd_ecoli</a> | <a href="#">rs18_ecoli</a> |
| P21645 | LPXD_ECOLI | *    | P21645 | P0A7V0 | <a href="#">lpxd_ecoli</a> | <a href="#">rs2_ecoli</a>  |
| P21645 | LPXD_ECOLI | *    | P21645 | P0A7V0 | <a href="#">lpxd_ecoli</a> | <a href="#">rs2_ecoli</a>  |
| P21645 | LPXD_ECOLI | *    | P21645 | P0A7U7 | <a href="#">lpxd_ecoli</a> | <a href="#">rs20_ecoli</a> |
| P21645 | LPXD_ECOLI | *    | P21645 | P0A7V3 | <a href="#">lpxd_ecoli</a> | <a href="#">rs3_ecoli</a>  |
| P21645 | LPXD_ECOLI | *    | P21645 | P0A7V3 | <a href="#">lpxd_ecoli</a> | <a href="#">rs3_ecoli</a>  |
| P21645 | LPXD_ECOLI | *    | P21645 | P0A7V3 | <a href="#">lpxd_ecoli</a> | <a href="#">rs3_ecoli</a>  |
| P21645 | LPXD_ECOLI | *    | P21645 | P0A7V8 | <a href="#">lpxd_ecoli</a> | <a href="#">rs4_ecoli</a>  |
| P21645 | LPXD_ECOLI | *    | P21645 | P0A7V8 | <a href="#">lpxd_ecoli</a> | <a href="#">rs4_ecoli</a>  |
| P21645 | LPXD_ECOLI | *    | P21645 | P0A7V8 | <a href="#">lpxd_ecoli</a> | <a href="#">rs4_ecoli</a>  |
| P21645 | LPXD_ECOLI | *    | P21645 | P0A7W1 | <a href="#">lpxd_ecoli</a> | <a href="#">rs5_ecoli</a>  |
| P21645 | LPXD_ECOLI | *    | P21645 | P0A7W1 | <a href="#">lpxd_ecoli</a> | <a href="#">rs5_ecoli</a>  |
| P21645 | LPXD_ECOLI | *    | P21645 | P02359 | <a href="#">lpxd_ecoli</a> | <a href="#">rs7_ecoli</a>  |
| P21645 | LPXD_ECOLI | *    | P21645 | P02359 | <a href="#">lpxd_ecoli</a> | <a href="#">rs7_ecoli</a>  |
| P21645 | LPXD_ECOLI | *    | P21645 | P02359 | <a href="#">lpxd_ecoli</a> | <a href="#">rs7_ecoli</a>  |
| P21645 | LPXD_ECOLI | *    | P21645 | P0A7W7 | <a href="#">lpxd_ecoli</a> | <a href="#">rs8_ecoli</a>  |
| P21645 | LPXD_ECOLI | *    | P21645 | P0A7X3 | <a href="#">lpxd_ecoli</a> | <a href="#">rs9_ecoli</a>  |
| P21645 | LPXD_ECOLI | *    | P21645 | P00962 | <a href="#">lpxd_ecoli</a> | <a href="#">syq_ecoli</a>  |
| P21645 | LPXD_ECOLI | *    | P21645 | P07023 | <a href="#">lpxd_ecoli</a> | <a href="#">tyra_ecoli</a> |
| P21645 | LPXD_ECOLI | *    | P21645 | P76160 | <a href="#">lpxd_ecoli</a> | <a href="#">ydfc_ecoli</a> |
| P21645 | LPXD_ECOLI | *    | P21645 | P0AGJ5 | <a href="#">lpxd_ecoli</a> | <a href="#">yfif_ecoli</a> |
| P21645 | LPXD_ECOLI | *    | P21645 | P0AGK4 | <a href="#">lpxd_ecoli</a> | <a href="#">yhby_ecoli</a> |
| P21645 | LPXD_ECOLI | *    | P21645 | P0AF76 | <a href="#">lpxd_ecoli</a> | <a href="#">yjfi_ecoli</a> |
| P0ACJ0 | LRP_ECOLI  | *    | P0ACJ0 | P18843 | <a href="#">lrp_ecoli</a>  | <a href="#">nade_ecoli</a> |
| P0ACJ0 | LRP_ECOLI  | *    | P0ACJ0 | P0A9P4 | <a href="#">lrp_ecoli</a>  | <a href="#">trxb_ecoli</a> |
| P75823 | LTAE_ECOLI | *    | P75823 | P18843 | <a href="#">ltae_ecoli</a> | <a href="#">nade_ecoli</a> |
| P45578 | LUXS_ECOLI | *    | P45578 | P00722 | <a href="#">luxs_ecoli</a> | <a href="#">bgal_ecoli</a> |
| P45578 | LUXS_ECOLI | *    | P45578 | P0A6Y8 | <a href="#">luxs_ecoli</a> | <a href="#">dnak_ecoli</a> |
| P45578 | LUXS_ECOLI | *    | P45578 | P52645 | <a href="#">luxs_ecoli</a> | <a href="#">ydbh_ecoli</a> |
| P78285 | LYSD_ECOLI | *    | P78285 | P0A910 | <a href="#">lysd_ecoli</a> | <a href="#">ompa_ecoli</a> |
| P03030 | LYSR_ECOLI | *    | P03030 | P27129 | <a href="#">lysr_ecoli</a> | <a href="#">rfaj_ecoli</a> |
| P0AEX9 | MALE_ECOLI | none |        |        |                            |                            |
| P68187 | MALK_ECOLI | none |        |        |                            |                            |
| P15977 | MALQ_ECOLI | none |        |        |                            |                            |

|        |            |          |        |            |             |
|--------|------------|----------|--------|------------|-------------|
| P06993 | MALT_ECOLI | * P06993 | P0A6F5 | malt_ecoli | ch60_ecoli  |
| P06993 | MALT_ECOLI | * P06993 | P08622 | malt_ecoli | dnaj_ecoli  |
| P06993 | MALT_ECOLI | * P06993 | P0CE47 | malt_ecoli | eftu1_ecoli |
| P06993 | MALT_ECOLI | * P06993 | P31574 | malt_ecoli | fixb_ecoli  |
| P06993 | MALT_ECOLI | * P06993 | P52613 | malt_ecoli | flij_ecoli  |
| P06993 | MALT_ECOLI | * P06993 | P0A817 | malt_ecoli | metk_ecoli  |
| P06993 | MALT_ECOLI | * P06993 | P0A9X4 | malt_ecoli | mreb_ecoli  |
| P06993 | MALT_ECOLI | * P06993 | P0AAH0 | malt_ecoli | pstb_ecoli  |
| P06993 | MALT_ECOLI | * P06993 | P0AG30 | malt_ecoli | rho_ecoli   |
| P06993 | MALT_ECOLI | * P06993 | P0A7K6 | malt_ecoli | rl19_ecoli  |
| P00946 | MANA_ECOLI | * P00946 | P31119 | mana_ecoli | aas_ecoli   |
| P00946 | MANA_ECOLI | * P00946 | P12999 | mana_ecoli | bioc_ecoli  |
| P00946 | MANA_ECOLI | * P00946 | P0AC53 | mana_ecoli | g6pd_ecoli  |
| P00946 | MANA_ECOLI | * P00946 | P0AAJ8 | mana_ecoli | hyba_ecoli  |
| P00946 | MANA_ECOLI | * P00946 | P0A717 | mana_ecoli | kprs_ecoli  |
| P00946 | MANA_ECOLI | * P00946 | P21517 | mana_ecoli | malz_ecoli  |
| P00946 | MANA_ECOLI | * P00946 | P18196 | mana_ecoli | minc_ecoli  |
| P00946 | MANA_ECOLI | * P00946 | P0AF16 | mana_ecoli | mvin_ecoli  |
| P00946 | MANA_ECOLI | * P00946 | P18843 | mana_ecoli | nade_ecoli  |
| P00946 | MANA_ECOLI | * P00946 | P76161 | mana_ecoli | req2_ecoli  |
| P00946 | MANA_ECOLI | * P00946 | P45748 | mana_ecoli | rimn_ecoli  |
| P00946 | MANA_ECOLI | * P00946 | P60422 | mana_ecoli | rl2_ecoli   |
| P00946 | MANA_ECOLI | * P00946 | P75864 | mana_ecoli | rlml_ecoli  |
| P00946 | MANA_ECOLI | * P00946 | P04805 | mana_ecoli | sye_ecoli   |
| P00946 | MANA_ECOLI | * P00946 | P07024 | mana_ecoli | usha_ecoli  |
| P00946 | MANA_ECOLI | * P00946 | P37339 | mana_ecoli | ygaf_ecoli  |
| P00946 | MANA_ECOLI | * P00946 | P31448 | mana_ecoli | yidk_ecoli  |
| P00946 | MANA_ECOLI | * P00946 | P77536 | mana_ecoli | ykgf_ecoli  |
| P00946 | MANA_ECOLI | * P00946 | P42620 | mana_ecoli | yqjg_ecoli  |
| P0AEY1 | MARC_ECOLI | none     |        |            |             |
| P08997 | MASY_ECOLI | * P08997 | P22523 | masy_ecoli | mukb_ecoli  |
| P37330 | MASZ_ECOLI | * P37330 | P07118 | masz_ecoli | syv_ecoli   |
| P0ACD8 | MBHL_ECOLI | none     |        |            |             |
| P69739 | MBHS_ECOLI | none     |        |            |             |
| P0AEY5 | MDAB_ECOLI | * P0AEY5 | P0A6F5 | mdab_ecoli | ch60_ecoli  |
| P0AEY5 | MDAB_ECOLI | * P0AEY5 | P0ABK9 | mdab_ecoli | nrfa_ecoli  |

|        |            |      |        |        |            |             |
|--------|------------|------|--------|--------|------------|-------------|
| P61889 | MDH_ECOLI  | *    | P61889 | P60438 | mdh_ecoli  | rl3_ecoli   |
| P61889 | MDH_ECOLI  | *    | P61889 | P0A7V8 | mdh_ecoli  | rs4_ecoli   |
| P61889 | MDH_ECOLI  | *    | P61889 | P0A8N3 | mdh_ecoli  | syk1_ecoli  |
| P61889 | MDH_ECOLI  | *    | P61889 | P07813 | mdh_ecoli  | syl_ecoli   |
| P61889 | MDH_ECOLI  | *    | P61889 | P0A8G3 | mdh_ecoli  | uxac_ecoli  |
|        |            |      |        |        |            |             |
| P37636 | MDTE_ECOLI | *    | P37636 | P37636 | mdte_ecoli | mdte_ecoli  |
| P37636 | MDTE_ECOLI | *    | P37636 | P37636 | mdte_ecoli | mdte_ecoli  |
|        |            |      |        |        |            |             |
| P32715 | MDTO_ECOLI | none |        |        |            |             |
|        |            |      |        |        |            |             |
| POABU0 | MENB_ECOLI | *    | POABU0 | P67910 | menb_ecoli | hldd_ecoli  |
| POABU0 | MENB_ECOLI | *    | POABU0 | P67910 | menb_ecoli | hldd_ecoli  |
| POABU0 | MENB_ECOLI | *    | POABU0 | P18843 | menb_ecoli | nade_ecoli  |
| POABU0 | MENB_ECOLI | *    | POABU0 | P15288 | menb_ecoli | pepd_ecoli  |
| POABU0 | MENB_ECOLI | *    | POABU0 | P0AG59 | menb_ecoli | rs14_ecoli  |
|        |            |      |        |        |            |             |
| P25665 | METE_ECOLI | *    | P25665 | P77671 | mete_ecoli | allb_ecoli  |
| P25665 | METE_ECOLI | *    | P25665 | P77188 | mete_ecoli | matc_ecoli  |
| P25665 | METE_ECOLI | *    | P25665 | P0A9T0 | mete_ecoli | sera_ecoli  |
| P25665 | METE_ECOLI | *    | P25665 | P76115 | mete_ecoli | yncd_ecoli  |
|        |            |      |        |        |            |             |
| P13009 | METH_ECOLI | *    | P13009 | P33363 | meth_ecoli | bglx_ecoli  |
| P13009 | METH_ECOLI | *    | P13009 | P10443 | meth_ecoli | dpo3a_ecoli |
| P13009 | METH_ECOLI | *    | P13009 | P09831 | meth_ecoli | gltb_ecoli  |
| P13009 | METH_ECOLI | *    | P13009 | P05793 | meth_ecoli | ilvc_ecoli  |
|        |            |      |        |        |            |             |
| POA817 | METK_ECOLI | *    | POA817 | P0A6F5 | metk_ecoli | ch60_ecoli  |
| POA817 | METK_ECOLI | *    | POA817 | P39099 | metk_ecoli | degq_ecoli  |
| POA817 | METK_ECOLI | *    | POA817 | P08622 | metk_ecoli | dnaj_ecoli  |
| POA817 | METK_ECOLI | *    | POA817 | P08622 | metk_ecoli | dnaj_ecoli  |
| POA817 | METK_ECOLI | *    | POA817 | P0A6Y8 | metk_ecoli | dnak_ecoli  |
| POA817 | METK_ECOLI | *    | POA817 | P0CE47 | metk_ecoli | eftu1_ecoli |
| POA817 | METK_ECOLI | *    | POA817 | P0CE47 | metk_ecoli | eftu1_ecoli |
| POA817 | METK_ECOLI | *    | POA817 | P0AAJ3 | metk_ecoli | fdnh_ecoli  |
| POA817 | METK_ECOLI | *    | POA817 | P75938 | metk_ecoli | flgf_ecoli  |
| POA817 | METK_ECOLI | *    | POA817 | P52612 | metk_ecoli | flii_ecoli  |
| POA817 | METK_ECOLI | *    | POA817 | P33135 | metk_ecoli | flir_ecoli  |
| POA817 | METK_ECOLI | *    | POA817 | P0ABY2 | metk_ecoli | flit_ecoli  |
| POA817 | METK_ECOLI | *    | POA817 | P0A717 | metk_ecoli | kprs_ecoli  |
| POA817 | METK_ECOLI | *    | POA817 | P0A9X4 | metk_ecoli | mreb_ecoli  |
| POA817 | METK_ECOLI | *    | POA817 | P18843 | metk_ecoli | nade_ecoli  |
| POA817 | METK_ECOLI | *    | POA817 | P16690 | metk_ecoli | phnn_ecoli  |
| POA817 | METK_ECOLI | *    | POA817 | P0AAH0 | metk_ecoli | pstb_ecoli  |
| POA817 | METK_ECOLI | *    | POA817 | P0A7G6 | metk_ecoli | reca_ecoli  |

|        |            |   |        |        |                            |                             |
|--------|------------|---|--------|--------|----------------------------|-----------------------------|
| P0A817 | METK_ECOLI | * | P0A817 | P10408 | <a href="#">metk_ecoli</a> | <a href="#">seca_ecoli</a>  |
| P0A817 | METK_ECOLI | * | P0A817 | P60651 | <a href="#">metk_ecoli</a> | <a href="#">speb_ecoli</a>  |
| P0A817 | METK_ECOLI | * | P0A817 | P00960 | <a href="#">metk_ecoli</a> | <a href="#">syga_ecoli</a>  |
| P0A817 | METK_ECOLI | * | P0A817 | P0A850 | <a href="#">metk_ecoli</a> | <a href="#">tig_ecoli</a>   |
| P0A817 | METK_ECOLI | * | P0A817 | P28915 | <a href="#">metk_ecoli</a> | <a href="#">ybfc_ecoli</a>  |
| P28635 | METQ_ECOLI | * | P28635 | P0A6Y8 | <a href="#">metq_ecoli</a> | <a href="#">dnak_ecoli</a>  |
| P30958 | MFD_ECOLI  | * | P30958 | P0A6X7 | <a href="#">mfd_ecoli</a>  | <a href="#">ihfa_ecoli</a>  |
| P30958 | MFD_ECOLI  | * | P30958 | P31600 | <a href="#">mfd_ecoli</a>  | <a href="#">nfra_ecoli</a>  |
| P30958 | MFD_ECOLI  | * | P30958 | P60422 | <a href="#">mfd_ecoli</a>  | <a href="#">rl2_ecoli</a>   |
| P30958 | MFD_ECOLI  | * | P30958 | P0A7S9 | <a href="#">mfd_ecoli</a>  | <a href="#">rs13_ecoli</a>  |
| P30958 | MFD_ECOLI  | * | P30958 | P0ACG1 | <a href="#">mfd_ecoli</a>  | <a href="#">stpa_ecoli</a>  |
| P30958 | MFD_ECOLI  | * | P30958 | P0AAD8 | <a href="#">mfd_ecoli</a>  | <a href="#">tdcc_ecoli</a>  |
| P30958 | MFD_ECOLI  | * | P30958 | P64521 | <a href="#">mfd_ecoli</a>  | <a href="#">yeet_ecoli</a>  |
| P30958 | MFD_ECOLI  | * | P30958 | P24178 | <a href="#">mfd_ecoli</a>  | <a href="#">yffb_ecoli</a>  |
| P0AEI1 | MIAB_ECOLI | * | P0AEI1 | P0A6F5 | <a href="#">miab_ecoli</a> | <a href="#">ch60_ecoli</a>  |
| P0AEI1 | MIAB_ECOLI | * | P0AEI1 | P0AC41 | <a href="#">miab_ecoli</a> | <a href="#">dhsa_ecoli</a>  |
| P0AEI1 | MIAB_ECOLI | * | P0AEI1 | P08622 | <a href="#">miab_ecoli</a> | <a href="#">dnaj_ecoli</a>  |
| P0AEI1 | MIAB_ECOLI | * | P0AEI1 | P0A6Y8 | <a href="#">miab_ecoli</a> | <a href="#">dnak_ecoli</a>  |
| P0AEI1 | MIAB_ECOLI | * | P0AEI1 | P0CE47 | <a href="#">miab_ecoli</a> | <a href="#">eftu1_ecoli</a> |
| P0AEI1 | MIAB_ECOLI | * | P0AEI1 | P0CE47 | <a href="#">miab_ecoli</a> | <a href="#">eftu1_ecoli</a> |
| P0AEI1 | MIAB_ECOLI | * | P0AEI1 | P45395 | <a href="#">miab_ecoli</a> | <a href="#">kdsd_ecoli</a>  |
| P0AEI1 | MIAB_ECOLI | * | P0AEI1 | P0A717 | <a href="#">miab_ecoli</a> | <a href="#">kprs_ecoli</a>  |
| P0AEI1 | MIAB_ECOLI | * | P0AEI1 | P0A9X4 | <a href="#">miab_ecoli</a> | <a href="#">mreb_ecoli</a>  |
| P0AEI1 | MIAB_ECOLI | * | P0AEI1 | P0AAH0 | <a href="#">miab_ecoli</a> | <a href="#">pstb_ecoli</a>  |
| P0AEI1 | MIAB_ECOLI | * | P0AEI1 | P60422 | <a href="#">miab_ecoli</a> | <a href="#">rl2_ecoli</a>   |
| P0AEI1 | MIAB_ECOLI | * | P0AEI1 | P60723 | <a href="#">miab_ecoli</a> | <a href="#">rl4_ecoli</a>   |
| P18196 | MINC_ECOLI | * | P18196 | P0AFD1 | <a href="#">minc_ecoli</a> | <a href="#">nuoe_ecoli</a>  |
| P18196 | MINC_ECOLI | * | P18196 | P60422 | <a href="#">minc_ecoli</a> | <a href="#">rl2_ecoli</a>   |
| P18196 | MINC_ECOLI | * | P18196 | P62399 | <a href="#">minc_ecoli</a> | <a href="#">rl5_ecoli</a>   |
| P18196 | MINC_ECOLI | * | P18196 | P0A7V0 | <a href="#">minc_ecoli</a> | <a href="#">rs2_ecoli</a>   |
| P18196 | MINC_ECOLI | * | P18196 | P0A7V3 | <a href="#">minc_ecoli</a> | <a href="#">rs3_ecoli</a>   |
| P18196 | MINC_ECOLI | * | P18196 | P0A7V8 | <a href="#">minc_ecoli</a> | <a href="#">rs4_ecoli</a>   |
| P18196 | MINC_ECOLI | * | P18196 | P0A9K9 | <a href="#">minc_ecoli</a> | <a href="#">slyd_ecoli</a>  |
| P18196 | MINC_ECOLI | * | P18196 | P0AGC7 | <a href="#">minc_ecoli</a> | <a href="#">smp_ecoli</a>   |
| P18196 | MINC_ECOLI | * | P18196 | P37646 | <a href="#">minc_ecoli</a> | <a href="#">yhjh_ecoli</a>  |
| P0AEZ3 | MIND_ECOLI |   | none   |        |                            |                             |
| P0A734 | MINE_ECOLI | * | P0A734 | P0ABT2 | <a href="#">mine_ecoli</a> | <a href="#">dps_ecoli</a>   |
| P0A734 | MINE_ECOLI | * | P0A734 | P18843 | <a href="#">mine_ecoli</a> | <a href="#">nade_ecoli</a>  |
| P0A734 | MINE_ECOLI | * | P0A734 | P0AFD1 | <a href="#">mine_ecoli</a> | <a href="#">nuoe_ecoli</a>  |



|        |             |   |        |        |            |             |
|--------|-------------|---|--------|--------|------------|-------------|
| P0A734 | MINE_ECOLI  | * | P0A734 | P0AFD6 | mine_ecoli | nuoi_ecoli  |
| P0A734 | MINE_ECOLI  | * | P0A734 | P62399 | mine_ecoli | rl5_ecoli   |
| P0A734 | MINE_ECOLI  | * | P0A734 | P0AG55 | mine_ecoli | rl6_ecoli   |
| P0ADV7 | MLAC_ECOLI  | * | P0ADV7 | P0A6Y8 | mlac_ecoli | dnak_ecoli  |
| P0ADV7 | MLAC_ECOLI  | * | P0ADV7 | P0A7V0 | mlac_ecoli | rs2_ecoli   |
| P64604 | MLAD_ECOLI  |   | none   |        |            |             |
| P64606 | MLAE_ECOLI  |   | none   |        |            |             |
| Q47690 | MMUM_ECOLI  | * | Q47690 | P0A6Y8 | mmum_ecoli | dnak_ecoli  |
| Q47690 | MMUM_ECOLI  | * | Q47690 | P18843 | mmum_ecoli | nade_ecoli  |
| P54746 | MNGB_ECOLI  | * | P54746 | P0A6F5 | mngb_ecoli | ch60_ecoli  |
| P54746 | MNGB_ECOLI  | * | P54746 | P0AC41 | mngb_ecoli | dhsa_ecoli  |
| P54746 | MNGB_ECOLI  | * | P54746 | P24183 | mngb_ecoli | fdng_ecoli  |
| P54746 | MNGB_ECOLI  | * | P54746 | P0A7M2 | mngb_ecoli | rl28_ecoli  |
| P13669 | MNGR_ECOLI  | * | P13669 | P0A717 | mngr_ecoli | kprs_ecoli  |
| P13669 | MNGR_ECOLI  | * | P13669 | P0A7M2 | mngr_ecoli | rl28_ecoli  |
| P13669 | MNGR_ECOLI  | * | P13669 | P0A7N4 | mngr_ecoli | rl32_ecoli  |
| P13669 | MNGR_ECOLI  | * | P13669 | P61887 | mngr_ecoli | rmla2_ecoli |
| P25745 | MNMA_ECOLI  | * | P25745 | P18843 | mnma_ecoli | nade_ecoli  |
| P25745 | MNMA_ECOLI  | * | P25745 | P60422 | mnma_ecoli | rl2_ecoli   |
| P30745 | MOAA_ECOLI  | * | P30745 | P0A6F5 | moaa_ecoli | ch60_ecoli  |
| P30745 | MOAA_ECOLI  | * | P30745 | P0A6F5 | moaa_ecoli | ch60_ecoli  |
| P30745 | MOAA_ECOLI  | * | P30745 | P0A6F5 | moaa_ecoli | ch60_ecoli  |
| P30745 | MOAA_ECOLI  | * | P30745 | P07363 | moaa_ecoli | chea_ecoli  |
| P30745 | MOAA_ECOLI  | * | P30745 | P0CE47 | moaa_ecoli | eftu1_ecoli |
| P30745 | MOAA_ECOLI  | * | P30745 | P0AES6 | moaa_ecoli | gyrb_ecoli  |
| P30745 | MOAA_ECOLI  | * | P30745 | P18843 | moaa_ecoli | nade_ecoli  |
| P30745 | MOAA_ECOLI  | * | P30745 | P0A7J0 | moaa_ecoli | ribb_ecoli  |
| P30745 | MOAA_ECOLI  | * | P30745 | P0AG48 | moaa_ecoli | rl21_ecoli  |
| P30745 | MOAA_ECOLI  | * | P30745 | P02359 | moaa_ecoli | rs7_ecoli   |
| P30745 | MOAA_ECOLI  | * | P30745 | P0A832 | moaa_ecoli | ssrp_ecoli  |
| P30745 | MOAA_ECOLI  | * | P30745 | P75693 | moaa_ecoli | yahn_ecoli  |
| P30745 | MOAA_ECOLI  | * | P30745 | P76104 | moaa_ecoli | ydcp_ecoli  |
| P0AEZ9 | MOAB_ECOLI  | * | P0AEZ9 | P0A7M2 | moab_ecoli | rl28_ecoli  |
| P0AEZ9 | MOAB_ECOLI  | * | P0AEZ9 | P75977 | moab_ecoli | ymfm_ecoli  |
| P08098 | MOBA1_ECOLX |   | none   |        |            |             |

|        |             |          |        |             |             |
|--------|-------------|----------|--------|-------------|-------------|
| P07112 | MOBA2_ECOLX | none     |        |             |             |
| P12281 | MOEA_ECOLI  | * P12281 | P0A6E4 | moea_ecoli  | assy_ecoli  |
| P12281 | MOEA_ECOLI  | * P12281 | P0A796 | moea_ecoli  | k6pf1_ecoli |
| P12281 | MOEA_ECOLI  | * P12281 | P77188 | moea_ecoli  | matc_ecoli  |
| P12281 | MOEA_ECOLI  | * P12281 | P32173 | moea_ecoli  | moba_ecoli  |
| P12281 | MOEA_ECOLI  | * P12281 | P32173 | moea_ecoli  | moba_ecoli  |
| P12281 | MOEA_ECOLI  | * P12281 | P32173 | moea_ecoli  | moba_ecoli  |
| P12281 | MOEA_ECOLI  | * P12281 | P12281 | moea_ecoli  | moea_ecoli  |
| P12281 | MOEA_ECOLI  | * P12281 | P0AF03 | moea_ecoli  | mog_ecoli   |
| P12281 | MOEA_ECOLI  | * P12281 | P18843 | moea_ecoli  | nade_ecoli  |
| P33345 | MOLR_ECOLI  | * P33345 | P0A6F5 | molr_ecoli  | ch60_ecoli  |
| P37773 | MPL_ECOLI   | * P37773 | P0AAZ4 | mpl_ecoli   | rara_ecoli  |
| POACR9 | MPRA_ECOLI  | * POACR9 | P00722 | mpira_ecoli | bgal_ecoli  |
| POACR9 | MPRA_ECOLI  | * POACR9 | P0A6M8 | mpira_ecoli | efg_ecoli   |
| POACR9 | MPRA_ECOLI  | * POACR9 | P07762 | mpira_ecoli | glgb_ecoli  |
| POACR9 | MPRA_ECOLI  | * POACR9 | P41443 | mpira_ecoli | gsph_ecoli  |
| POACR9 | MPRA_ECOLI  | * POACR9 | P31658 | mpira_ecoli | hcha_ecoli  |
| POACR9 | MPRA_ECOLI  | * POACR9 | P19319 | mpira_ecoli | narz_ecoli  |
| POACR9 | MPRA_ECOLI  | * POACR9 | P33602 | mpira_ecoli | nuog_ecoli  |
| POACR9 | MPRA_ECOLI  | * POACR9 | Q57083 | mpira_ecoli | perr_ecoli  |
| POACR9 | MPRA_ECOLI  | * POACR9 | P00957 | mpira_ecoli | sya_ecoli   |
| POACR9 | MPRA_ECOLI  | * POACR9 | P76343 | mpira_ecoli | yedz_ecoli  |
| P22186 | MRAZ_ECOLI  | * P22186 | P0A6F5 | mrax_ecoli  | ch60_ecoli  |
| P22186 | MRAZ_ECOLI  | * P22186 | P75938 | mrax_ecoli  | flgf_ecoli  |
| P22186 | MRAZ_ECOLI  | * P22186 | P0AEM6 | mrax_ecoli  | fliia_ecoli |
| P22186 | MRAZ_ECOLI  | * P22186 | P0A717 | mrax_ecoli  | kprs_ecoli  |
| P22186 | MRAZ_ECOLI  | * P22186 | P22186 | mrax_ecoli  | mrax_ecoli  |
| POA9X4 | MREB_ECOLI  | * POA9X4 | P0ABD5 | mrab_ecoli  | acca_ecoli  |
| POA9X4 | MREB_ECOLI  | * POA9X4 | P22333 | mrab_ecoli  | add_ecoli   |
| POA9X4 | MREB_ECOLI  | * POA9X4 | P0ABB4 | mrab_ecoli  | atpb_ecoli  |
| POA9X4 | MREB_ECOLI  | * POA9X4 | P0A6F5 | mrab_ecoli  | ch60_ecoli  |
| POA9X4 | MREB_ECOLI  | * POA9X4 | P0A6F5 | mrab_ecoli  | ch60_ecoli  |
| POA9X4 | MREB_ECOLI  | * POA9X4 | P63284 | mrab_ecoli  | clpb_ecoli  |
| POA9X4 | MREB_ECOLI  | * POA9X4 | P08622 | mrab_ecoli  | dnaj_ecoli  |
| POA9X4 | MREB_ECOLI  | * POA9X4 | P08622 | mrab_ecoli  | dnaj_ecoli  |
| POA9X4 | MREB_ECOLI  | * POA9X4 | P0A6Y8 | mrab_ecoli  | dnak_ecoli  |
| POA9X4 | MREB_ECOLI  | * POA9X4 | P0A6Y8 | mrab_ecoli  | dnak_ecoli  |
| POA9X4 | MREB_ECOLI  | * POA9X4 | P0A6M8 | mrab_ecoli  | efg_ecoli   |

|        |            |   |        |        |            |             |
|--------|------------|---|--------|--------|------------|-------------|
| POA9X4 | MREB_ECOLI | * | POA9X4 | POCE47 | mreb_ecoli | eftu1_ecoli |
| POA9X4 | MREB_ECOLI | * | POA9X4 | POCE47 | mreb_ecoli | eftu1_ecoli |
| POA9X4 | MREB_ECOLI | * | POA9X4 | POC8J6 | mreb_ecoli | gaty_ecoli  |
| POA9X4 | MREB_ECOLI | * | POA9X4 | POAES4 | mreb_ecoli | gyra_ecoli  |
| POA9X4 | MREB_ECOLI | * | POA9X4 | POC054 | mreb_ecoli | ibpa_ecoli  |
| POA9X4 | MREB_ECOLI | * | POA9X4 | P03819 | mreb_ecoli | kefc_ecoli  |
| POA9X4 | MREB_ECOLI | * | POA9X4 | P68187 | mreb_ecoli | malk_ecoli  |
| POA9X4 | MREB_ECOLI | * | POA9X4 | P06993 | mreb_ecoli | malt_ecoli  |
| POA9X4 | MREB_ECOLI | * | POA9X4 | P0AEI1 | mreb_ecoli | miab_ecoli  |
| POA9X4 | MREB_ECOLI | * | POA9X4 | P0AEZ3 | mreb_ecoli | mind_ecoli  |
| POA9X4 | MREB_ECOLI | * | POA9X4 | P09152 | mreb_ecoli | narg_ecoli  |
| POA9X4 | MREB_ECOLI | * | POA9X4 | P33599 | mreb_ecoli | nuocd_ecoli |
| POA9X4 | MREB_ECOLI | * | POA9X4 | P0AFG0 | mreb_ecoli | nusg_ecoli  |
| POA9X4 | MREB_ECOLI | * | POA9X4 | P0A910 | mreb_ecoli | ompa_ecoli  |
| POA9X4 | MREB_ECOLI | * | POA9X4 | P06996 | mreb_ecoli | ompc_ecoli  |
| POA9X4 | MREB_ECOLI | * | POA9X4 | P05055 | mreb_ecoli | pnp_ecoli   |
| POA9X4 | MREB_ECOLI | * | POA9X4 | P0AAH0 | mreb_ecoli | pstb_ecoli  |
| POA9X4 | MREB_ECOLI | * | POA9X4 | P37188 | mreb_ecoli | ptkb_ecoli  |
| POA9X4 | MREB_ECOLI | * | POA9X4 | P24554 | mreb_ecoli | rada_ecoli  |
| POA9X4 | MREB_ECOLI | * | POA9X4 | P0A7G6 | mreb_ecoli | reca_ecoli  |
| POA9X4 | MREB_ECOLI | * | POA9X4 | P0AG30 | mreb_ecoli | rho_ecoli   |
| POA9X4 | MREB_ECOLI | * | POA9X4 | P60438 | mreb_ecoli | rl3_ecoli   |
| POA9X4 | MREB_ECOLI | * | POA9X4 | P62399 | mreb_ecoli | rl5_ecoli   |
| POA9X4 | MREB_ECOLI | * | POA9X4 | P0A8V2 | mreb_ecoli | rpob_ecoli  |
| POA9X4 | MREB_ECOLI | * | POA9X4 | P0A8T7 | mreb_ecoli | rpoc_ecoli  |
| POA9X4 | MREB_ECOLI | * | POA9X4 | P02358 | mreb_ecoli | rs6_ecoli   |
| POA9X4 | MREB_ECOLI | * | POA9X4 | P10408 | mreb_ecoli | seca_ecoli  |
| POA9X4 | MREB_ECOLI | * | POA9X4 | P10408 | mreb_ecoli | seca_ecoli  |
| POA9X4 | MREB_ECOLI | * | POA9X4 | P00960 | mreb_ecoli | syga_ecoli  |
| POA9X4 | MREB_ECOLI | * | POA9X4 | P0A8N5 | mreb_ecoli | syk2_ecoli  |
| POA9X4 | MREB_ECOLI | * | POA9X4 | P39177 | mreb_ecoli | uspg_ecoli  |
| POA9X4 | MREB_ECOLI | * | POA9X4 | P0A8J4 | mreb_ecoli | ybed_ecoli  |
| POA9X4 | MREB_ECOLI | * | POA9X4 | P64476 | mreb_ecoli | ydiH_ecoli  |
| POA9X4 | MREB_ECOLI | * | POA9X4 | P0AF90 | mreb_ecoli | yjgd_ecoli  |

P16926 MREC\_ECOLI

none

|        |           |   |        |        |           |            |
|--------|-----------|---|--------|--------|-----------|------------|
| POAF08 | MRP_ECOLI | * | POAF08 | P0AAJ3 | mrp_ecoli | fdnh_ecoli |
| POAF08 | MRP_ECOLI | * | POAF08 | P0A9A9 | mrp_ecoli | fur_ecoli  |
| POAF08 | MRP_ECOLI | * | POAF08 | P18843 | mrp_ecoli | nade_ecoli |
| POAF08 | MRP_ECOLI | * | POAF08 | P24211 | mrp_ecoli | rhse_ecoli |
| POAF08 | MRP_ECOLI | * | POAF08 | P64574 | mrp_ecoli | yghw_ecoli |

P24202 MRR\_ECOLI

none

|        |            |   |        |        |            |             |
|--------|------------|---|--------|--------|------------|-------------|
| P24205 | MSBB_ECOLI | * | P24205 | P36683 | msbb_ecoli | acon2_ecoli |
| P24205 | MSBB_ECOLI | * | P24205 | P35340 | msbb_ecoli | ahpf_ecoli  |
| P24205 | MSBB_ECOLI | * | P24205 | P0A6F5 | msbb_ecoli | ch60_ecoli  |
| P24205 | MSBB_ECOLI | * | P24205 | P63284 | msbb_ecoli | clpb_ecoli  |
| P24205 | MSBB_ECOLI | * | P24205 | P0A6M8 | msbb_ecoli | efg_ecoli   |
| P24205 | MSBB_ECOLI | * | P24205 | P08394 | msbb_ecoli | ex5b_ecoli  |
| P24205 | MSBB_ECOLI | * | P24205 | P0AEM9 | msbb_ecoli | fliy_ecoli  |
| P24205 | MSBB_ECOLI | * | P24205 | P0AC53 | msbb_ecoli | g6pd_ecoli  |
| P24205 | MSBB_ECOLI | * | P24205 | P27249 | msbb_ecoli | gIhd_ecoli  |
| P24205 | MSBB_ECOLI | * | P24205 | P13035 | msbb_ecoli | glpd_ecoli  |
| P24205 | MSBB_ECOLI | * | P24205 | P0AES4 | msbb_ecoli | gyra_ecoli  |
| P24205 | MSBB_ECOLI | * | P24205 | P0ACV0 | msbb_ecoli | htrb_ecoli  |
| P24205 | MSBB_ECOLI | * | P24205 | P33602 | msbb_ecoli | nuog_ecoli  |
| P24205 | MSBB_ECOLI | * | P24205 | P0AFG8 | msbb_ecoli | odp1_ecoli  |
| P24205 | MSBB_ECOLI | * | P24205 | P0C077 | msbb_ecoli | rele_ecoli  |
| P24205 | MSBB_ECOLI | * | P24205 | P0A7S9 | msbb_ecoli | rs13_ecoli  |
| P24205 | MSBB_ECOLI | * | P24205 | P00957 | msbb_ecoli | sya_ecoli   |
| P24205 | MSBB_ECOLI | * | P24205 | P06612 | msbb_ecoli | top1_ecoli  |
| P24205 | MSBB_ECOLI | * | P24205 | P75970 | msbb_ecoli | vxis_ecoli  |
| P24205 | MSBB_ECOLI | * | P24205 | P75977 | msbb_ecoli | ymfm_ecoli  |
| P0C0S1 | MSCS_ECOLI | * | P0C0S1 | P0ADK0 | mcs_e_coli | yiaf_ecoli  |
| P0A744 | MSRA_ECOLI | * | P0A744 | P0ACJ0 | msra_ecoli | lrp_ecoli   |
| P09424 | MTLD_ECOLI | * | P09424 | P23847 | mtld_ecoli | dppa_ecoli  |
| P09424 | MTLD_ECOLI | * | P09424 | P0ADI4 | mtld_ecoli | entb_ecoli  |
| P09424 | MTLD_ECOLI | * | P09424 | P77504 | mtld_ecoli | ybbp_ecoli  |
| P09424 | MTLD_ECOLI | * | P09424 | P76119 | mtld_ecoli | ynci_ecoli  |
| P0AF12 | MTNN_ECOLI | * | P0AF12 | P0A6Y8 | mtnn_ecoli | dnak_ecoli  |
| P0AF12 | MTNN_ECOLI | * | P0AF12 | P0C8J8 | mtnn_ecoli | gatz_ecoli  |
| P0AF12 | MTNN_ECOLI | * | P0AF12 | P0A6V1 | mtnn_ecoli | glgc_ecoli  |
| P0AF12 | MTNN_ECOLI | * | P0AF12 | P0A996 | mtnn_ecoli | glpc_ecoli  |
| P0AF12 | MTNN_ECOLI | * | P0AF12 | P45465 | mtnn_ecoli | yan_ecoli   |
| P40874 | MTOX_ECOLI | * | P40874 | P0AEJ4 | mtox_ecoli | envz_ecoli  |
| P40874 | MTOX_ECOLI | * | P40874 | P0ABK9 | mtox_ecoli | nrfa_ecoli  |
| P40874 | MTOX_ECOLI | * | P40874 | P0A7D7 | mtox_ecoli | pur7_ecoli  |
| P40874 | MTOX_ECOLI | * | P40874 | P60422 | mtox_ecoli | rl2_ecoli   |
| P40874 | MTOX_ECOLI | * | P40874 | P0AG71 | mtox_ecoli | rmuc_ecoli  |
| P40874 | MTOX_ECOLI | * | P40874 | P07813 | mtox_ecoli | syl_ecoli   |
| P40874 | MTOX_ECOLI | * | P40874 | P0ADK6 | mtox_ecoli | yiba_ecoli  |
| P40874 | MTOX_ECOLI | * | P40874 | P16694 | mtox_ecoli | yjda_ecoli  |

|        |            |      |        |        |                            |                             |
|--------|------------|------|--------|--------|----------------------------|-----------------------------|
| P22524 | MUKE_ECOLI | *    | P22524 | P0A717 | <a href="#">muke_ecoli</a> | <a href="#">kprs_ecoli</a>  |
| P22524 | MUKE_ECOLI | *    | P22524 | P22523 | <a href="#">muke_ecoli</a> | <a href="#">mukb_ecoli</a>  |
| P22524 | MUKE_ECOLI | *    | P22524 | P22523 | <a href="#">muke_ecoli</a> | <a href="#">mukb_ecoli</a>  |
| P22524 | MUKE_ECOLI | *    | P22524 | P60293 | <a href="#">muke_ecoli</a> | <a href="#">mukf_ecoli</a>  |
| P22524 | MUKE_ECOLI | *    | P22524 | P60293 | <a href="#">muke_ecoli</a> | <a href="#">mukf_ecoli</a>  |
| P22524 | MUKE_ECOLI | *    | P22524 | P60293 | <a href="#">muke_ecoli</a> | <a href="#">mukf_ecoli</a>  |
| P22524 | MUKE_ECOLI | *    | P22524 | P60293 | <a href="#">muke_ecoli</a> | <a href="#">mukf_ecoli</a>  |
| P22524 | MUKE_ECOLI | *    | P22524 | P60293 | <a href="#">muke_ecoli</a> | <a href="#">mukf_ecoli</a>  |
| P22524 | MUKE_ECOLI | *    | P22524 | P60422 | <a href="#">muke_ecoli</a> | <a href="#">rl2_ecoli</a>   |
| P22524 | MUKE_ECOLI | *    | P22524 | P0A7X3 | <a href="#">muke_ecoli</a> | <a href="#">rs9_ecoli</a>   |
| P22524 | MUKE_ECOLI | *    | P22524 | P0A843 | <a href="#">muke_ecoli</a> | <a href="#">tate_ecoli</a>  |
| P22524 | MUKE_ECOLI | *    | P22524 | P39321 | <a href="#">muke_ecoli</a> | <a href="#">ytnf_ecoli</a>  |
| P0A749 | MURA_ECOLI | *    | P0A749 | P39099 | <a href="#">mura_ecoli</a> | <a href="#">degq_ecoli</a>  |
| P0A749 | MURA_ECOLI | *    | P0A749 | P0CE47 | <a href="#">mura_ecoli</a> | <a href="#">eftu1_ecoli</a> |
| P0A749 | MURA_ECOLI | *    | P0A749 | P0AD68 | <a href="#">mura_ecoli</a> | <a href="#">ftsi_ecoli</a>  |
| P0A749 | MURA_ECOLI | *    | P0A749 | P30870 | <a href="#">mura_ecoli</a> | <a href="#">gln_e_coli</a>  |
| P0A749 | MURA_ECOLI | *    | P0A749 | P77188 | <a href="#">mura_ecoli</a> | <a href="#">matc_ecoli</a>  |
| P0A749 | MURA_ECOLI | *    | P0A749 | P18843 | <a href="#">mura_ecoli</a> | <a href="#">nade_ecoli</a>  |
| P0A749 | MURA_ECOLI | *    | P0A749 | P37095 | <a href="#">mura_ecoli</a> | <a href="#">pepb_ecoli</a>  |
| P0A749 | MURA_ECOLI | *    | P0A749 | P42184 | <a href="#">mura_ecoli</a> | <a href="#">prsa_ecolx</a>  |
| P0A749 | MURA_ECOLI | *    | P0A749 | P60240 | <a href="#">mura_ecoli</a> | <a href="#">rapa_ecoli</a>  |
| P0A749 | MURA_ECOLI | *    | P0A749 | P0A7J7 | <a href="#">mura_ecoli</a> | <a href="#">rl11_ecoli</a>  |
| P0A749 | MURA_ECOLI | *    | P0A749 | P0AA10 | <a href="#">mura_ecoli</a> | <a href="#">rl13_ecoli</a>  |
| P0A749 | MURA_ECOLI | *    | P0A749 | P61175 | <a href="#">mura_ecoli</a> | <a href="#">rl22_ecoli</a>  |
| P0A749 | MURA_ECOLI | *    | P0A749 | P60723 | <a href="#">mura_ecoli</a> | <a href="#">rl4_ecoli</a>   |
| P0A749 | MURA_ECOLI | *    | P0A749 | P0A7K2 | <a href="#">mura_ecoli</a> | <a href="#">rl7_ecoli</a>   |
| P0A749 | MURA_ECOLI | *    | P0A749 | P0A7R5 | <a href="#">mura_ecoli</a> | <a href="#">rs10_ecoli</a>  |
| P0A749 | MURA_ECOLI | *    | P0A749 | P0A7V0 | <a href="#">mura_ecoli</a> | <a href="#">rs2_ecoli</a>   |
| P0A749 | MURA_ECOLI | *    | P0A749 | P04152 | <a href="#">mura_ecoli</a> | <a href="#">umuc_ecoli</a>  |
| P0A749 | MURA_ECOLI | *    | P0A749 | P0A698 | <a href="#">mura_ecoli</a> | <a href="#">uvra_ecoli</a>  |
| P0A749 | MURA_ECOLI | *    | P0A749 | P76387 | <a href="#">mura_ecoli</a> | <a href="#">wzc_ecoli</a>   |
| P0A749 | MURA_ECOLI | *    | P0A749 | P46837 | <a href="#">mura_ecoli</a> | <a href="#">yhgf_ecoli</a>  |
| P23909 | MUTS_ECOLI | *    | P23909 | P30847 | <a href="#">muts_ecoli</a> | <a href="#">baes_ecoli</a>  |
| P23909 | MUTS_ECOLI | *    | P23909 | P0CE47 | <a href="#">muts_ecoli</a> | <a href="#">eftu1_ecoli</a> |
| P23909 | MUTS_ECOLI | *    | P23909 | P0AEJ4 | <a href="#">muts_ecoli</a> | <a href="#">envz_ecoli</a>  |
| P23909 | MUTS_ECOLI | *    | P23909 | P0AAB6 | <a href="#">muts_ecoli</a> | <a href="#">galf_ecoli</a>  |
| P23909 | MUTS_ECOLI | *    | P23909 | P23909 | <a href="#">muts_ecoli</a> | <a href="#">muts_ecoli</a>  |
| P08337 | MUTT_ECOLI | none |        |        |                            |                             |
| P18843 | NADE_ECOLI | *    | P18843 | P77398 | <a href="#">nade_ecoli</a> | <a href="#">arna_ecoli</a>  |
| P18843 | NADE_ECOLI | *    | P18843 | P52043 | <a href="#">nade_ecoli</a> | <a href="#">yghf_ecoli</a>  |
| P18843 | NADE_ECOLI | *    | P18843 | P28722 | <a href="#">nade_ecoli</a> | <a href="#">yhca_ecoli</a>  |

|        |            |   |        |        |            |             |
|--------|------------|---|--------|--------|------------|-------------|
| POAF20 | NAGC_ECOLI | * | POAF20 | POA6F5 | nagc_ecoli | ch60_ecoli  |
| POAF20 | NAGC_ECOLI | * | POAF20 | POA759 | nagc_ecoli | nagb_ecoli  |
| POAF20 | NAGC_ECOLI | * | POAF20 | POA7M2 | nagc_ecoli | rl28_ecoli  |
| POAF20 | NAGC_ECOLI | * | POAF20 | POAA43 | nagc_ecoli | rsua_ecoli  |
| POAF20 | NAGC_ECOLI | * | POAF20 | POA843 | nagc_ecoli | tate_ecoli  |
| POA6L4 | NANA_ECOLI | * | POA6L4 | P37639 | nana_ecoli | gadx_ecoli  |
| POA6L4 | NANA_ECOLI | * | POA6L4 | P18843 | nana_ecoli | nade_ecoli  |
| POA6L4 | NANA_ECOLI | * | POA6L4 | P36566 | nana_ecoli | smta_ecoli  |
| POA8W0 | NANR_ECOLI |   | none   |        |            |             |
| POAAL3 | NAPG_ECOLI |   | none   |        |            |             |
| P09152 | NARG_ECOLI | * | P09152 | P08622 | narg_ecoli | dnaj_ecoli  |
| P09152 | NARG_ECOLI | * | P09152 | POCE47 | narg_ecoli | eftu1_ecoli |
| P09152 | NARG_ECOLI | * | P09152 | P67910 | narg_ecoli | hldd_ecoli  |
| P09152 | NARG_ECOLI | * | P09152 | POA9X4 | narg_ecoli | mreb_ecoli  |
| P09152 | NARG_ECOLI | * | P09152 | P11349 | narg_ecoli | narh_ecoli  |
| P09152 | NARG_ECOLI | * | P09152 | P11349 | narg_ecoli | narh_ecoli  |
| P09152 | NARG_ECOLI | * | P09152 | P11349 | narg_ecoli | narh_ecoli  |
| P09152 | NARG_ECOLI | * | P09152 | P11349 | narg_ecoli | narh_ecoli  |
| P09152 | NARG_ECOLI | * | P09152 | P11349 | narg_ecoli | narh_ecoli  |
| P09152 | NARG_ECOLI | * | P09152 | P11349 | narg_ecoli | narh_ecoli  |
| P09152 | NARG_ECOLI | * | P09152 | P11350 | narg_ecoli | nari_ecoli  |
| P09152 | NARG_ECOLI | * | P09152 | P11350 | narg_ecoli | nari_ecoli  |
| P09152 | NARG_ECOLI | * | P09152 | P11350 | narg_ecoli | nari_ecoli  |
| P09152 | NARG_ECOLI | * | P09152 | P11350 | narg_ecoli | nari_ecoli  |
| P09152 | NARG_ECOLI | * | P09152 | P11350 | narg_ecoli | nari_ecoli  |
| P09152 | NARG_ECOLI | * | P09152 | P11350 | narg_ecoli | nari_ecoli  |
| P09152 | NARG_ECOLI | * | P09152 | P11350 | narg_ecoli | nari_ecoli  |
| P09152 | NARG_ECOLI | * | P09152 | P11350 | narg_ecoli | nari_ecoli  |
| P09152 | NARG_ECOLI | * | P09152 | POAF26 | narg_ecoli | narj_ecoli  |
| P09152 | NARG_ECOLI | * | P09152 | POAF26 | narg_ecoli | narj_ecoli  |
| P09152 | NARG_ECOLI | * | P09152 | P19318 | narg_ecoli | nary_ecoli  |
| P09152 | NARG_ECOLI | * | P09152 | POA7G6 | narg_ecoli | reca_ecoli  |
| P09152 | NARG_ECOLI | * | P09152 | POA7V8 | narg_ecoli | rs4_ecoli   |
| P11349 | NARH_ECOLI | * | P11349 | POCE47 | narh_ecoli | eftu1_ecoli |
| P11349 | NARH_ECOLI | * | P11349 | P42593 | narh_ecoli | fadh_ecoli  |
| P11349 | NARH_ECOLI | * | P11349 | P18843 | narh_ecoli | nade_ecoli  |
| P11349 | NARH_ECOLI | * | P11349 | P09152 | narh_ecoli | narg_ecoli  |
| P11349 | NARH_ECOLI | * | P11349 | P09152 | narh_ecoli | narg_ecoli  |
| P11349 | NARH_ECOLI | * | P11349 | P09152 | narh_ecoli | narg_ecoli  |
| P11349 | NARH_ECOLI | * | P11349 | P19319 | narh_ecoli | narz_ecoli  |
| P11349 | NARH_ECOLI | * | P11349 | POAG80 | narh_ecoli | ugpb_ecoli  |



|        |            |      |        |        |            |             |
|--------|------------|------|--------|--------|------------|-------------|
| P0AF26 | NARJ_ECOLI | *    | P0AF26 | P15034 | narj_ecoli | amppp_ecoli |
| P0AF26 | NARJ_ECOLI | *    | P0AF26 | P0AC41 | narj_ecoli | dhsa_ecoli  |
| P0AF26 | NARJ_ECOLI | *    | P0AF26 | P0A9P0 | narj_ecoli | dldh_ecoli  |
| P0AF26 | NARJ_ECOLI | *    | P0AF26 | P09152 | narj_ecoli | narg_ecoli  |
| P0AF26 | NARJ_ECOLI | *    | P0AF26 | P09152 | narj_ecoli | narg_ecoli  |
| P0AF26 | NARJ_ECOLI | *    | P0AF26 | P11349 | narj_ecoli | narh_ecoli  |
| P0AF26 | NARJ_ECOLI | *    | P0AF26 | P11349 | narj_ecoli | narh_ecoli  |
| P0AF26 | NARJ_ECOLI | *    | P0AF26 | P19318 | narj_ecoli | nary_ecoli  |
| P0AF26 | NARJ_ECOLI | *    | P0AF26 | P06959 | narj_ecoli | odp2_ecoli  |
| P0AF26 | NARJ_ECOLI | *    | P0AF26 | P0A910 | narj_ecoli | ompa_ecoli  |
| P0AF26 | NARJ_ECOLI | *    | P0AF26 | P0A7K2 | narj_ecoli | rl7_ecoli   |
| P0AF26 | NARJ_ECOLI | *    | P0AF26 | P0AA91 | narj_ecoli | yeay_ecoli  |
| P0AF28 | NARL_ECOLI | *    | P0AF28 | P31434 | narl_ecoli | xyls_ecoli  |
| P31802 | NARP_ECOLI | *    | P31802 | P31658 | narp_ecoli | hcha_ecoli  |
| P31802 | NARP_ECOLI | *    | P31802 | P0AAL3 | narp_ecoli | napg_ecoli  |
| P38489 | NFNB_ECOLI | none |        |        |            |             |
| P17117 | NFSA_ECOLI | *    | P17117 | P0A6Y8 | nfsa_ecoli | dnak_ecoli  |
| P63020 | NFUA_ECOLI | *    | P63020 | P36683 | nfua_ecoli | acon2_ecoli |
| P63020 | NFUA_ECOLI | *    | P63020 | P69330 | nfua_ecoli | citd_ecoli  |
| P63020 | NFUA_ECOLI | *    | P63020 | P0AF08 | nfua_ecoli | mrp_ecoli   |
| P63020 | NFUA_ECOLI | *    | P63020 | P18843 | nfua_ecoli | nade_ecoli  |
| P63020 | NFUA_ECOLI | *    | P63020 | P75949 | nfua_ecoli | nagz_ecoli  |
| P63020 | NFUA_ECOLI | *    | P63020 | P33602 | nfua_ecoli | nuog_ecoli  |
| P63020 | NFUA_ECOLI | *    | P63020 | P0AFG0 | nfua_ecoli | nusg_ecoli  |
| P63020 | NFUA_ECOLI | *    | P63020 | P0A7J3 | nfua_ecoli | rl10_ecoli  |
| P63020 | NFUA_ECOLI | *    | P63020 | P0ADY3 | nfua_ecoli | rl14_ecoli  |
| P63020 | NFUA_ECOLI | *    | P63020 | P60438 | nfua_ecoli | rl3_ecoli   |
| P63020 | NFUA_ECOLI | *    | P63020 | P0A7V8 | nfua_ecoli | rs4_ecoli   |
| P63020 | NFUA_ECOLI | *    | P63020 | P30138 | nfua_ecoli | thif_ecoli  |
| P0A9G2 | NHAR_ECOLI | *    | P0A9G2 | P0A6F5 | nhar_ecoli | ch60_ecoli  |
| P52647 | NIFJ_ECOLI | *    | P52647 | P0A6S0 | nifj_ecoli | flgh_ecoli  |
| P52647 | NIFJ_ECOLI | *    | P52647 | P75942 | nifj_ecoli | flgj_ecoli  |
| P52647 | NIFJ_ECOLI | *    | P52647 | P0A8S9 | nifj_ecoli | flhd_ecoli  |
| P52647 | NIFJ_ECOLI | *    | P52647 | P76297 | nifj_ecoli | flhe_ecoli  |
| P52647 | NIFJ_ECOLI | *    | P52647 | P52647 | nifj_ecoli | nifj_ecoli  |
| P52647 | NIFJ_ECOLI | *    | P52647 | P06612 | nifj_ecoli | top1_ecoli  |
| P52647 | NIFJ_ECOLI | *    | P52647 | P39280 | nifj_ecoli | yjek_ecoli  |

|        |             |          |        |             |             |  |
|--------|-------------|----------|--------|-------------|-------------|--|
| P08201 | NIRB_ECOLI  | none     |        |             |             |  |
| P0AF63 | NSRR_ECOLI  | * P0AF63 | P0A717 | nsrr_ecoli  | kprs_ecoli  |  |
| P0AFB8 | NTRC_ECOLI  | * P0AFB8 | P0AFB8 | ntrc_ecoli  | ntrc_ecoli  |  |
| P0AFC0 | NUDB_ECOLI  | * P0AFC0 | P37309 | nudb_ecoli  | arsr_ecoli  |  |
| P0AFC0 | NUDB_ECOLI  | * P0AFC0 | P0A9P0 | nudb_ecoli  | dldh_ecoli  |  |
| P0AFC0 | NUDB_ECOLI  | * P0AFC0 | P0A6Y8 | nudb_ecoli  | dnak_ecoli  |  |
| P0AFC0 | NUDB_ECOLI  | * P0AFC0 | P18843 | nudb_ecoli  | nade_ecoli  |  |
| P0AFC0 | NUDB_ECOLI  | * P0AFC0 | P0AFG8 | nudb_ecoli  | odp1_ecoli  |  |
| P0AFC0 | NUDB_ECOLI  | * P0AFC0 | P0ADY3 | nudb_ecoli  | rl14_ecoli  |  |
| P0AFC0 | NUDB_ECOLI  | * P0AFC0 | P39177 | nudb_ecoli  | uspg_ecoli  |  |
| P32664 | NUDC_ECOLI  | none     |        |             |             |  |
| P37128 | NUDK_ECOLI  | * P37128 | P36683 | nudk_ecoli  | acon2_ecoli |  |
| P37128 | NUDK_ECOLI  | * P37128 | P0AE08 | nudk_ecoli  | ahpc_ecoli  |  |
| P37128 | NUDK_ECOLI  | * P37128 | P76555 | nudk_ecoli  | eutq_ecoli  |  |
| P37128 | NUDK_ECOLI  | * P37128 | P0AF28 | nudk_ecoli  | nar1_ecoli  |  |
| P37128 | NUDK_ECOLI  | * P37128 | P0AFG8 | nudk_ecoli  | odp1_ecoli  |  |
| P37128 | NUDK_ECOLI  | * P37128 | P0A9M8 | nudk_ecoli  | pta_ecoli   |  |
| P37128 | NUDK_ECOLI  | * P37128 | P0AG55 | nudk_ecoli  | rl6_ecoli   |  |
| P37128 | NUDK_ECOLI  | * P37128 | P0A8G0 | nudk_ecoli  | uvrc_ecoli  |  |
| P0AFC3 | NUOA_ECOLI  | none     |        |             |             |  |
| P33599 | NUOCD_ECOLI | * P33599 | P0AFC7 | nuocd_ecoli | nuob_ecoli  |  |
| P33599 | NUOCD_ECOLI | * P33599 | P33602 | nuocd_ecoli | nuog_ecoli  |  |
| P31979 | NUOF_ECOLI  | * P31979 | P0A6F5 | nuof_ecoli  | ch60_ecoli  |  |
| P31979 | NUOF_ECOLI  | * P31979 | P21177 | nuof_ecoli  | fadb_ecoli  |  |
| P31979 | NUOF_ECOLI  | * P31979 | P0AFD1 | nuof_ecoli  | nuoe_ecoli  |  |
| P31979 | NUOF_ECOLI  | * P31979 | P33602 | nuof_ecoli  | nuog_ecoli  |  |
| P31979 | NUOF_ECOLI  | * P31979 | P0A8F8 | nuof_ecoli  | uvrb_ecoli  |  |
| P33602 | NUOG_ECOLI  | none     |        |             |             |  |
| P0AFF6 | NUSA_ECOLI  | * P0AFF6 | P0A6E4 | nusa_ecoli  | assy_ecoli  |  |
| P0AFF6 | NUSA_ECOLI  | * P0AFF6 | P0ABE7 | nusa_ecoli  | c562_ecolx  |  |
| P0AFF6 | NUSA_ECOLI  | * P0AFF6 | P0CE47 | nusa_ecoli  | eftu1_ecoli |  |
| P0AFF6 | NUSA_ECOLI  | * P0AFF6 | P0A9A9 | nusa_ecoli  | fur_ecoli   |  |
| P0AFF6 | NUSA_ECOLI  | * P0AFF6 | P0A705 | nusa_ecoli  | if2_ecoli   |  |
| P0AFF6 | NUSA_ECOLI  | * P0AFF6 | P0A705 | nusa_ecoli  | if2_ecoli   |  |
| P0AFF6 | NUSA_ECOLI  | * P0AFF6 | P0A705 | nusa_ecoli  | if2_ecoli   |  |

|        |            |   |        |        |            |            |
|--------|------------|---|--------|--------|------------|------------|
| POAFF6 | NUSA_ECOLI | * | POAFF6 | P0A8U6 | nusa_ecoli | metj_ecoli |
| POAFF6 | NUSA_ECOLI | * | POAFF6 | P0AFG8 | nusa_ecoli | odp1_ecoli |
| POAFF6 | NUSA_ECOLI | * | POAFF6 | P42184 | nusa_ecoli | prsa_ecolx |
| POAFF6 | NUSA_ECOLI | * | POAFF6 | P0AG82 | nusa_ecoli | psts_ecoli |
| POAFF6 | NUSA_ECOLI | * | POAFF6 | P16919 | nusa_ecoli | rhsd_ecoli |
| POAFF6 | NUSA_ECOLI | * | POAFF6 | P0A7L0 | nusa_ecoli | rl1_ecoli  |
| POAFF6 | NUSA_ECOLI | * | POAFF6 | P02413 | nusa_ecoli | rl15_ecoli |
| POAFF6 | NUSA_ECOLI | * | POAFF6 | P02413 | nusa_ecoli | rl15_ecoli |
| POAFF6 | NUSA_ECOLI | * | POAFF6 | P0ADY7 | nusa_ecoli | rl16_ecoli |
| POAFF6 | NUSA_ECOLI | * | POAFF6 | P0A7K6 | nusa_ecoli | rl19_ecoli |
| POAFF6 | NUSA_ECOLI | * | POAFF6 | P0A7K6 | nusa_ecoli | rl19_ecoli |
| POAFF6 | NUSA_ECOLI | * | POAFF6 | P60422 | nusa_ecoli | rl2_ecoli  |
| POAFF6 | NUSA_ECOLI | * | POAFF6 | P60422 | nusa_ecoli | rl2_ecoli  |
| POAFF6 | NUSA_ECOLI | * | POAFF6 | P61175 | nusa_ecoli | rl22_ecoli |
| POAFF6 | NUSA_ECOLI | * | POAFF6 | P61175 | nusa_ecoli | rl22_ecoli |
| POAFF6 | NUSA_ECOLI | * | POAFF6 | P60624 | nusa_ecoli | rl24_ecoli |
| POAFF6 | NUSA_ECOLI | * | POAFF6 | P60438 | nusa_ecoli | rl3_ecoli  |
| POAFF6 | NUSA_ECOLI | * | POAFF6 | P60723 | nusa_ecoli | rl4_ecoli  |
| POAFF6 | NUSA_ECOLI | * | POAFF6 | P62399 | nusa_ecoli | rl5_ecoli  |
| POAFF6 | NUSA_ECOLI | * | POAFF6 | P0AG55 | nusa_ecoli | rl6_ecoli  |
| POAFF6 | NUSA_ECOLI | * | POAFF6 | P0AGB3 | nusa_ecoli | rp32_ecoli |
| POAFF6 | NUSA_ECOLI | * | POAFF6 | P0A7Z4 | nusa_ecoli | rpoa_ecoli |
| POAFF6 | NUSA_ECOLI | * | POAFF6 | P0A7Z4 | nusa_ecoli | rpoa_ecoli |
| POAFF6 | NUSA_ECOLI | * | POAFF6 | P0A8V2 | nusa_ecoli | rpob_ecoli |
| POAFF6 | NUSA_ECOLI | * | POAFF6 | P0A8V2 | nusa_ecoli | rpob_ecoli |
| POAFF6 | NUSA_ECOLI | * | POAFF6 | P0A8V2 | nusa_ecoli | rpob_ecoli |
| POAFF6 | NUSA_ECOLI | * | POAFF6 | P0A8T7 | nusa_ecoli | rpoc_ecoli |
| POAFF6 | NUSA_ECOLI | * | POAFF6 | P0A8T7 | nusa_ecoli | rpoc_ecoli |
| POAFF6 | NUSA_ECOLI | * | POAFF6 | P0A8T7 | nusa_ecoli | rpoc_ecoli |
| POAFF6 | NUSA_ECOLI | * | POAFF6 | P00579 | nusa_ecoli | rpod_ecoli |
| POAFF6 | NUSA_ECOLI | * | POAFF6 | P0A800 | nusa_ecoli | rpoz_ecoli |
| POAFF6 | NUSA_ECOLI | * | POAFF6 | P0A7V3 | nusa_ecoli | rs3_ecoli  |
| POAFF6 | NUSA_ECOLI | * | POAFF6 | P0A7V3 | nusa_ecoli | rs3_ecoli  |
| POAFF6 | NUSA_ECOLI | * | POAFF6 | P0A7V8 | nusa_ecoli | rs4_ecoli  |
| POAFF6 | NUSA_ECOLI | * | POAFF6 | P0A7V8 | nusa_ecoli | rs4_ecoli  |
| POAFF6 | NUSA_ECOLI | * | POAFF6 | P0A7V8 | nusa_ecoli | rs4_ecoli  |
| POAFF6 | NUSA_ECOLI | * | POAFF6 | P0A7W1 | nusa_ecoli | rs5_ecoli  |
| POAFF6 | NUSA_ECOLI | * | POAFF6 | P0A7W1 | nusa_ecoli | rs5_ecoli  |
| POAFF6 | NUSA_ECOLI | * | POAFF6 | P02359 | nusa_ecoli | rs7_ecoli  |
| POAFF6 | NUSA_ECOLI | * | POAFF6 | P02359 | nusa_ecoli | rs7_ecoli  |
| POAFF6 | NUSA_ECOLI | * | POAFF6 | P0A7X3 | nusa_ecoli | rs9_ecoli  |
| POAFF6 | NUSA_ECOLI | * | POAFF6 | P0AED0 | nusa_ecoli | uspa_ecoli |
| POAFF6 | NUSA_ECOLI | * | POAFF6 | P0A698 | nusa_ecoli | uvra_ecoli |
| POAFF6 | NUSA_ECOLI | * | POAFF6 | P0AB43 | nusa_ecoli | ycgl_ecoli |
| POA780 | NUSB_ECOLI | * | POA780 | P06971 | nusb_ecoli | fhua_ecoli |

|        |            |      |        |        |            |             |
|--------|------------|------|--------|--------|------------|-------------|
| P0A780 | NUSB_ECOLI | *    | P0A780 | P21517 | nusb_ecoli | malz_ecoli  |
| P0A780 | NUSB_ECOLI | *    | P0A780 | P18843 | nusb_ecoli | nade_ecoli  |
| P0A780 | NUSB_ECOLI | *    | P0A780 | P0AA10 | nusb_ecoli | rl13_ecoli  |
| P0A780 | NUSB_ECOLI | *    | P0A780 | P60438 | nusb_ecoli | rl3_ecoli   |
| P0A780 | NUSB_ECOLI | *    | P0A780 | P0A7R5 | nusb_ecoli | rs10_ecoli  |
| P0A780 | NUSB_ECOLI | *    | P0A780 | P0A7R5 | nusb_ecoli | rs10_ecoli  |
| P0A780 | NUSB_ECOLI | *    | P0A780 | P0A7V0 | nusb_ecoli | rs2_ecoli   |
| P0A780 | NUSB_ECOLI | *    | P0A780 | P0A7V8 | nusb_ecoli | rs4_ecoli   |
| P0A780 | NUSB_ECOLI | *    | P0A780 | P0A7W1 | nusb_ecoli | rs5_ecoli   |
| P0A780 | NUSB_ECOLI | *    | P0A780 | P0AG90 | nusb_ecoli | secd_ecoli  |
| P0A780 | NUSB_ECOLI | *    | P0A780 | P0AGC3 | nusb_ecoli | slt_ecoli   |
| P0A780 | NUSB_ECOLI | *    | P0A780 | P76463 | nusb_ecoli | yfaq_ecoli  |
| P0AFG3 | ODO1_ECOLI | *    | P0AFG3 | P0A9P0 | odo1_ecoli | dldh_ecoli  |
| P0AFG3 | ODO1_ECOLI | *    | P0AFG3 | P0A9P0 | odo1_ecoli | dldh_ecoli  |
| P0AFG3 | ODO1_ECOLI | *    | P0AFG3 | P0ABC7 | odo1_ecoli | hflk_ecoli  |
| P0AFG3 | ODO1_ECOLI | *    | P0AFG3 | P60716 | odo1_ecoli | lipa_ecoli  |
| P0AFG3 | ODO1_ECOLI | *    | P0AFG3 | P0AFI0 | odo1_ecoli | oxc_ecoli   |
| P0AFG6 | ODO2_ECOLI | *    | P0AFG6 | P76316 | odo2_ecoli | dcyd_ecoli  |
| P0AFG6 | ODO2_ECOLI | *    | P0AFG6 | P0A9P0 | odo2_ecoli | dldh_ecoli  |
| P0AFG6 | ODO2_ECOLI | *    | P0AFG6 | P0A9A6 | odo2_ecoli | ftszy_ecoli |
| P0AFG6 | ODO2_ECOLI | *    | P0AFG6 | P0A9A9 | odo2_ecoli | fur_ecoli   |
| P0AFG6 | ODO2_ECOLI | *    | P0AFG6 | P60716 | odo2_ecoli | lipa_ecoli  |
| P0AFG6 | ODO2_ECOLI | *    | P0AFG6 | P0A9X4 | odo2_ecoli | mreb_ecoli  |
| P0AFG6 | ODO2_ECOLI | *    | P0AFG6 | P0AFL9 | odo2_ecoli | pqia_ecoli  |
| P0AFG6 | ODO2_ECOLI | *    | P0AFG6 | P46850 | odo2_ecoli | rtcb_ecoli  |
| P0AFG6 | ODO2_ECOLI | *    | P0AFG6 | P77717 | odo2_ecoli | ybay_ecoli  |
| P0AFG6 | ODO2_ECOLI | *    | P0AFG6 | P0AB43 | odo2_ecoli | ycgl_ecoli  |
| P0AFG6 | ODO2_ECOLI | *    | P0AFG6 | P08245 | odo2_ecoli | ycih_ecoli  |
| P0AFG8 | ODP1_ECOLI | none |        |        |            |             |
| P06959 | ODP2_ECOLI | *    | P06959 | P0AED9 | odp2_ecoli | dcm_ecoli   |
| P06959 | ODP2_ECOLI | *    | P06959 | P0AC41 | odp2_ecoli | dhsa_ecoli  |
| P06959 | ODP2_ECOLI | *    | P06959 | P0A9P0 | odp2_ecoli | dldh_ecoli  |
| P06959 | ODP2_ECOLI | *    | P06959 | P22523 | odp2_ecoli | mukb_ecoli  |
| P0A910 | OMPA_ECOLI | *    | P0A910 | P0A910 | ompa_ecoli | ompa_ecoli  |
| P0A910 | OMPA_ECOLI | *    | P0A910 | P0A850 | ompa_ecoli | tig_ecoli   |
| P06996 | OMPC_ECOLI | none |        |        |            |             |
| P0AA16 | OMPR_ECOLI | *    | P0AA16 | Q47083 | ompr_ecoli | cbl_ecoli   |
| P0AA16 | OMPR_ECOLI | *    | P0AA16 | P0AEJ4 | ompr_ecoli | envz_ecoli  |

|        |            |   |        |        |                            |                            |
|--------|------------|---|--------|--------|----------------------------|----------------------------|
| P0AA16 | OMPR_ECOLI | * | P0AA16 | P0A717 | <a href="#">ompr_ecoli</a> | <a href="#">kprs_ecoli</a> |
| P0AA16 | OMPR_ECOLI | * | P0AA16 | P75949 | <a href="#">ompr_ecoli</a> | <a href="#">nagz_ecoli</a> |
| P09169 | OMPT_ECOLI |   | none   |        |                            |                            |
| P27298 | OPDA_ECOLI | * | P27298 | P37651 | <a href="#">opda_ecoli</a> | <a href="#">gun_ecoli</a>  |
| P27298 | OPDA_ECOLI | * | P27298 | P39369 | <a href="#">opda_ecoli</a> | <a href="#">yjhr_ecoli</a> |
| P33136 | OPGG_ECOLI | * | P33136 | P0A7V3 | <a href="#">opgg_ecoli</a> | <a href="#">rs3_ecoli</a>  |
| P33136 | OPGG_ECOLI | * | P33136 | P0A7X3 | <a href="#">opgg_ecoli</a> | <a href="#">rs9_ecoli</a>  |
| P33136 | OPGG_ECOLI | * | P33136 | P0A9P4 | <a href="#">opgg_ecoli</a> | <a href="#">trxb_ecoli</a> |
| P33136 | OPGG_ECOLI | * | P33136 | P39321 | <a href="#">opgg_ecoli</a> | <a href="#">ytfn_ecoli</a> |
| P23843 | OPPA_ECOLI |   | none   |        |                            |                            |
| P0A784 | ORN_ECOLI  |   | none   |        |                            |                            |
| POCOL2 | OSMC_ECOLI | * | POCOL2 | P00722 | <a href="#">osmc_ecoli</a> | <a href="#">bgal_ecoli</a> |
| POCOL2 | OSMC_ECOLI | * | POCOL2 | P32176 | <a href="#">osmc_ecoli</a> | <a href="#">fdog_ecoli</a> |
| POCOL2 | OSMC_ECOLI | * | POCOL2 | P0AEX9 | <a href="#">osmc_ecoli</a> | <a href="#">male_ecoli</a> |
| POCOL2 | OSMC_ECOLI | * | POCOL2 | P54746 | <a href="#">osmc_ecoli</a> | <a href="#">mngb_ecoli</a> |
| POCOL2 | OSMC_ECOLI | * | POCOL2 | P05458 | <a href="#">osmc_ecoli</a> | <a href="#">ptrn_ecoli</a> |
| POCOL2 | OSMC_ECOLI | * | POCOL2 | P38684 | <a href="#">osmc_ecoli</a> | <a href="#">torr_ecoli</a> |
| POCOL2 | OSMC_ECOLI | * | POCOL2 | P0AD03 | <a href="#">osmc_ecoli</a> | <a href="#">yebs_ecoli</a> |
| POCOL2 | OSMC_ECOLI | * | POCOL2 | P39277 | <a href="#">osmc_ecoli</a> | <a href="#">yjeh_ecoli</a> |
| POCOL2 | OSMC_ECOLI | * | POCOL2 | P0AEH8 | <a href="#">osmc_ecoli</a> | <a href="#">yjig_ecoli</a> |
| P33362 | OSMF_ECOLI | * | P33362 | P18843 | <a href="#">osmf_ecoli</a> | <a href="#">nade_ecoli</a> |
| P33362 | OSMF_ECOLI | * | P33362 | P60723 | <a href="#">osmf_ecoli</a> | <a href="#">rl4_ecoli</a>  |
| P31677 | OTSA_ECOLI |   | none   |        |                            |                            |
| P0ACQ4 | OXYR_ECOLI |   | none   |        |                            |                            |
| P31663 | PANC_ECOLI | * | P31663 | P00722 | <a href="#">panc_ecoli</a> | <a href="#">bgal_ecoli</a> |
| P31663 | PANC_ECOLI | * | P31663 | P00968 | <a href="#">panc_ecoli</a> | <a href="#">carb_ecoli</a> |
| P31663 | PANC_ECOLI | * | P31663 | P0A6Y8 | <a href="#">panc_ecoli</a> | <a href="#">dnak_ecoli</a> |
| P31663 | PANC_ECOLI | * | P31663 | P31057 | <a href="#">panc_ecoli</a> | <a href="#">panb_ecoli</a> |
| P31663 | PANC_ECOLI | * | P31663 | P0A7D7 | <a href="#">panc_ecoli</a> | <a href="#">pur7_ecoli</a> |
| P31663 | PANC_ECOLI | * | P31663 | P0A9K9 | <a href="#">panc_ecoli</a> | <a href="#">slyd_ecoli</a> |
| P31663 | PANC_ECOLI | * | P31663 | P07024 | <a href="#">panc_ecoli</a> | <a href="#">usha_ecoli</a> |
| P31663 | PANC_ECOLI | * | P31663 | P07024 | <a href="#">panc_ecoli</a> | <a href="#">usha_ecoli</a> |
| P0AFI2 | PARC_ECOLI | * | P0AFI2 | P0A9P0 | <a href="#">parc_ecoli</a> | <a href="#">dldh_ecoli</a> |
| P0AFI2 | PARC_ECOLI | * | P0AFI2 | P0AES4 | <a href="#">parc_ecoli</a> | <a href="#">gyra_ecoli</a> |

|        |            |          |          |                            |                            |
|--------|------------|----------|----------|----------------------------|----------------------------|
| P0AFI2 | PARC_ECOLI | * P0AFI2 | P0A9X4   | <a href="#">parc_ecoli</a> | <a href="#">mreb_ecoli</a> |
| P0AFI2 | PARC_ECOLI | * P0AFI2 | P11880   | <a href="#">parc_ecoli</a> | <a href="#">murf_ecoli</a> |
| P0AFI2 | PARC_ECOLI | * P0AFI2 | P06959   | <a href="#">parc_ecoli</a> | <a href="#">odp2_ecoli</a> |
| P0AFI2 | PARC_ECOLI | * P0AFI2 | P32674   | <a href="#">parc_ecoli</a> | <a href="#">pfld_ecoli</a> |
| P0AFI2 | PARC_ECOLI | * P0AFI2 | P25742   | <a href="#">parc_ecoli</a> | <a href="#">rfaq_ecoli</a> |
| P0AFI2 | PARC_ECOLI | * P0AFI2 | P0A7L0   | <a href="#">parc_ecoli</a> | <a href="#">rl1_ecoli</a>  |
| P0AFI2 | PARC_ECOLI | * P0AFI2 | P0AA10   | <a href="#">parc_ecoli</a> | <a href="#">rl13_ecoli</a> |
| P0AFI2 | PARC_ECOLI | * P0AFI2 | P60422   | <a href="#">parc_ecoli</a> | <a href="#">rl2_ecoli</a>  |
| P0AFI2 | PARC_ECOLI | * P0AFI2 | P61175   | <a href="#">parc_ecoli</a> | <a href="#">rl22_ecoli</a> |
| P0AFI2 | PARC_ECOLI | * P0AFI2 | P0A7L8   | <a href="#">parc_ecoli</a> | <a href="#">rl27_ecoli</a> |
| P0AFI2 | PARC_ECOLI | * P0AFI2 | P0A7N9   | <a href="#">parc_ecoli</a> | <a href="#">rl33_ecoli</a> |
| P0AFI2 | PARC_ECOLI | * P0AFI2 | P0A7K2   | <a href="#">parc_ecoli</a> | <a href="#">rl7_ecoli</a>  |
| P0AFI2 | PARC_ECOLI | * P0AFI2 | P0A7R5   | <a href="#">parc_ecoli</a> | <a href="#">rs10_ecoli</a> |
| P0AFI2 | PARC_ECOLI | * P0AFI2 | P0A7V0   | <a href="#">parc_ecoli</a> | <a href="#">rs2_ecoli</a>  |
| P0AFI2 | PARC_ECOLI | * P0AFI2 | P10408   | <a href="#">parc_ecoli</a> | <a href="#">seca_ecoli</a> |
| P0AFI2 | PARC_ECOLI | * P0AFI2 | P0A9K9   | <a href="#">parc_ecoli</a> | <a href="#">slyd_ecoli</a> |
| P0AFI2 | PARC_ECOLI | * P0AFI2 | P08245   | <a href="#">parc_ecoli</a> | <a href="#">ycih_ecoli</a> |
| P02919 | PBPB_ECOLI | P02919-2 | P63883   | <a href="#">pbpb_ecoli</a> | <a href="#">amic_ecoli</a> |
| P02919 | PBPB_ECOLI | P02919-2 | P0AD68   | <a href="#">pbpb_ecoli</a> | <a href="#">ftsi_ecoli</a> |
| P02919 | PBPB_ECOLI | * P02919 | P29131   | <a href="#">pbpb_ecoli</a> | <a href="#">ftsn_ecoli</a> |
| P02919 | PBPB_ECOLI | * P02919 | P29131   | <a href="#">pbpb_ecoli</a> | <a href="#">ftsn_ecoli</a> |
| P02919 | PBPB_ECOLI | * P02919 | P29131   | <a href="#">pbpb_ecoli</a> | <a href="#">ftsn_ecoli</a> |
| P02919 | PBPB_ECOLI | P02919-2 | P0A908   | <a href="#">pbpb_ecoli</a> | <a href="#">mipa_ecoli</a> |
| P02919 | PBPB_ECOLI | P02919-2 | P02918   | <a href="#">pbpb_ecoli</a> | <a href="#">pbpa_ecoli</a> |
| P02919 | PBPB_ECOLI | P02919-2 | P02919-1 | <a href="#">pbpb_ecoli</a> | <a href="#">pbpb_ecoli</a> |
| P22259 | PCKA_ECOLI | * P22259 | P00722   | <a href="#">pcka_ecoli</a> | <a href="#">bgal_ecoli</a> |
| P22259 | PCKA_ECOLI | * P22259 | P0A9F9   | <a href="#">pcka_ecoli</a> | <a href="#">metr_ecoli</a> |
| P22259 | PCKA_ECOLI | * P22259 | P76272   | <a href="#">pcka_ecoli</a> | <a href="#">yebt_ecoli</a> |
| P0ABF1 | PCNB_ECOLI | none     |          |                            |                            |
| P0ACL9 | PDHR_ECOLI | * P0ACL9 | P0A6F5   | <a href="#">pdhr_ecoli</a> | <a href="#">ch60_ecoli</a> |
| P0ACL9 | PDHR_ECOLI | * P0ACL9 | P0A9P0   | <a href="#">pdhr_ecoli</a> | <a href="#">dldh_ecoli</a> |
| P0ACL9 | PDHR_ECOLI | * P0ACL9 | P0AFG8   | <a href="#">pdhr_ecoli</a> | <a href="#">odp1_ecoli</a> |
| P0ACL9 | PDHR_ECOLI | * P0ACL9 | P06959   | <a href="#">pdhr_ecoli</a> | <a href="#">odp2_ecoli</a> |
| P0ACL9 | PDHR_ECOLI | * P0ACL9 | P0A7M2   | <a href="#">pdhr_ecoli</a> | <a href="#">rl28_ecoli</a> |
| P0ACL9 | PDHR_ECOLI | * P0ACL9 | P0A843   | <a href="#">pdhr_ecoli</a> | <a href="#">tate_ecoli</a> |
| P19624 | PDXA_ECOLI | none     |          |                            |                            |
| P40191 | PDXK_ECOLI | * P40191 | P0A6Y8   | <a href="#">pdxk_ecoli</a> | <a href="#">dnak_ecoli</a> |
| P40191 | PDXK_ECOLI | * P40191 | P0AG44   | <a href="#">pdxk_ecoli</a> | <a href="#">rl17_ecoli</a> |



|        |            |   |        |        |                            |                             |
|--------|------------|---|--------|--------|----------------------------|-----------------------------|
| P77150 | PDXY_ECOLI | * | P77150 | P0A9C5 | <a href="#">pdxy_ecoli</a> | <a href="#">glna_ecoli</a>  |
| P77150 | PDXY_ECOLI | * | P77150 | Q47706 | <a href="#">pdxy_ecoli</a> | <a href="#">uidc_ecoli</a>  |
| P37095 | PEPB_ECOLI | * | P37095 | P0A6R0 | <a href="#">pepb_ecoli</a> | <a href="#">fabh_ecoli</a>  |
| P37095 | PEPB_ECOLI | * | P37095 | P15038 | <a href="#">pepb_ecoli</a> | <a href="#">held_ecoli</a>  |
| P37095 | PEPB_ECOLI | * | P37095 | P0A910 | <a href="#">pepb_ecoli</a> | <a href="#">ompa_ecoli</a>  |
| P15288 | PEPD_ECOLI | * | P15288 | P15034 | <a href="#">pepd_ecoli</a> | <a href="#">ampp_ecoli</a>  |
| P15288 | PEPD_ECOLI | * | P15288 | P15034 | <a href="#">pepd_ecoli</a> | <a href="#">ampp_ecoli</a>  |
| P15288 | PEPD_ECOLI | * | P15288 | P0A6Y8 | <a href="#">pepd_ecoli</a> | <a href="#">dnak_ecoli</a>  |
| P15288 | PEPD_ECOLI | * | P15288 | P30128 | <a href="#">pepd_ecoli</a> | <a href="#">greb_ecoli</a>  |
| P15288 | PEPD_ECOLI | * | P15288 | P60560 | <a href="#">pepd_ecoli</a> | <a href="#">guac_ecoli</a>  |
| P15288 | PEPD_ECOLI | * | P15288 | P15254 | <a href="#">pepd_ecoli</a> | <a href="#">pur4_ecoli</a>  |
| P15288 | PEPD_ECOLI | * | P15288 | P37750 | <a href="#">pepd_ecoli</a> | <a href="#">wbbj_ecoli</a>  |
| P21165 | PEPQ_ECOLI | * | P21165 | P32176 | <a href="#">pepq_ecoli</a> | <a href="#">fdog_ecoli</a>  |
| P21165 | PEPQ_ECOLI | * | P21165 | P21865 | <a href="#">pepq_ecoli</a> | <a href="#">kdpd_ecoli</a>  |
| P29745 | PEPT_ECOLI | * | P29745 | P0ABT2 | <a href="#">pept_ecoli</a> | <a href="#">dps_ecoli</a>   |
| P29745 | PEPT_ECOLI | * | P29745 | P0A6M8 | <a href="#">pept_ecoli</a> | <a href="#">efg_ecoli</a>   |
| P29745 | PEPT_ECOLI | * | P29745 | P0CE47 | <a href="#">pept_ecoli</a> | <a href="#">eftu1_ecoli</a> |
| P29745 | PEPT_ECOLI | * | P29745 | P0A9Z1 | <a href="#">pept_ecoli</a> | <a href="#">glnb_ecoli</a>  |
| P29745 | PEPT_ECOLI | * | P29745 | P0ACF8 | <a href="#">pept_ecoli</a> | <a href="#">hns_ecoli</a>   |
| P29745 | PEPT_ECOLI | * | P29745 | P18843 | <a href="#">pept_ecoli</a> | <a href="#">nade_ecoli</a>  |
| P29745 | PEPT_ECOLI | * | P29745 | P0A7C6 | <a href="#">pept_ecoli</a> | <a href="#">pepe_ecoli</a>  |
| P29745 | PEPT_ECOLI | * | P29745 | P09373 | <a href="#">pept_ecoli</a> | <a href="#">pflb_ecoli</a>  |
| P29745 | PEPT_ECOLI | * | P29745 | P09373 | <a href="#">pept_ecoli</a> | <a href="#">pflb_ecoli</a>  |
| P29745 | PEPT_ECOLI | * | P29745 | P09373 | <a href="#">pept_ecoli</a> | <a href="#">pflb_ecoli</a>  |
| P29745 | PEPT_ECOLI | * | P29745 | P07004 | <a href="#">pept_ecoli</a> | <a href="#">proa_ecoli</a>  |
| P29745 | PEPT_ECOLI | * | P29745 | P16919 | <a href="#">pept_ecoli</a> | <a href="#">rbsd_ecoli</a>  |
| P29745 | PEPT_ECOLI | * | P29745 | P02413 | <a href="#">pept_ecoli</a> | <a href="#">rl15_ecoli</a>  |
| P29745 | PEPT_ECOLI | * | P29745 | P0A858 | <a href="#">pept_ecoli</a> | <a href="#">tpis_ecoli</a>  |
| P29745 | PEPT_ECOLI | * | P29745 | P71243 | <a href="#">pept_ecoli</a> | <a href="#">wcal_ecoli</a>  |
| P29745 | PEPT_ECOLI | * | P29745 | P0AD53 | <a href="#">pept_ecoli</a> | <a href="#">ygac_ecoli</a>  |
| P29745 | PEPT_ECOLI | * | P29745 | P0A8H6 | <a href="#">pept_ecoli</a> | <a href="#">yihi_ecoli</a>  |
| P0A9N4 | PFLA_ECOLI | * | P0A9N4 | P77188 | <a href="#">pfla_ecoli</a> | <a href="#">matc_ecoli</a>  |
| P0A9N4 | PFLA_ECOLI | * | P0A9N4 | P18843 | <a href="#">pfla_ecoli</a> | <a href="#">nade_ecoli</a>  |
| P09373 | PFLB_ECOLI | * | P09373 | P06971 | <a href="#">pflb_ecoli</a> | <a href="#">fhua_ecoli</a>  |
| P09373 | PFLB_ECOLI | * | P09373 | P31574 | <a href="#">pflb_ecoli</a> | <a href="#">fixb_ecoli</a>  |
| P09373 | PFLB_ECOLI | * | P09373 | P0AC53 | <a href="#">pflb_ecoli</a> | <a href="#">g6pd_ecoli</a>  |
| P09373 | PFLB_ECOLI | * | P09373 | P68066 | <a href="#">pflb_ecoli</a> | <a href="#">grca_ecoli</a>  |
| P09373 | PFLB_ECOLI | * | P09373 | P68066 | <a href="#">pflb_ecoli</a> | <a href="#">grca_ecoli</a>  |
| P09373 | PFLB_ECOLI | * | P09373 | P21599 | <a href="#">pflb_ecoli</a> | <a href="#">kpyk2_ecoli</a> |

|        |            |      |        |        |            |              |
|--------|------------|------|--------|--------|------------|--------------|
| P09373 | PFLB_ECOLI | *    | P09373 | P77188 | pflb_ecoli | matc_ecoli   |
| P09373 | PFLB_ECOLI | *    | P09373 | P18843 | pflb_ecoli | nade_ecoli   |
| P09373 | PFLB_ECOLI | *    | P09373 | Q8FBV2 | pflb_ecoli | tnaa_ecol6   |
| P09373 | PFLB_ECOLI | *    | P09373 | P0A858 | pflb_ecoli | tpis_ecoli   |
| P09373 | PFLB_ECOLI | *    | P09373 | P0A858 | pflb_ecoli | tpis_ecoli   |
| P09373 | PFLB_ECOLI | *    | P09373 | P76154 | pflb_ecoli | ydfk_ecoli   |
| P0A799 | PGK_ECOLI  | *    | P0A799 | P0A6Y8 | pgk_ecoli  | dnak_ecoli   |
| P0A799 | PGK_ECOLI  | *    | P0A799 | P0A6P9 | pgk_ecoli  | eno_ecoli    |
| P0A799 | PGK_ECOLI  | *    | P0A799 | P0A6X3 | pgk_ecoli  | hfq_ecoli    |
| P0A799 | PGK_ECOLI  | *    | P0A799 | P05055 | pgk_ecoli  | pnp_ecoli    |
| P0A799 | PGK_ECOLI  | *    | P0A799 | P0A7R1 | pgk_ecoli  | rl9_ecoli    |
| P0A799 | PGK_ECOLI  | *    | P0A799 | P21513 | pgk_ecoli  | rne_ecoli    |
| P0A799 | PGK_ECOLI  | *    | P0A799 | P0AG59 | pgk_ecoli  | rs14_ecoli   |
| P0A799 | PGK_ECOLI  | *    | P0A799 | P0A7U7 | pgk_ecoli  | rs20_ecoli   |
| P0A799 | PGK_ECOLI  | *    | P0A799 | P02358 | pgk_ecoli  | rs6_ecoli    |
| P36938 | PGM_ECOLI  | *    | P36938 | P18843 | pgm_ecoli  | nade_ecoli   |
| P77366 | PGMB_ECOLI | none |        |        |            |              |
| P0AFJ1 | PHNA_ECOLI | none |        |        |            |              |
| P16681 | PHNB_ECOLI | *    | P16681 | P75977 | phnb_ecoli | ymfm_ecoli   |
| P0A9K3 | PHOL_ECOLI | *    | P0A9K3 | P77239 | phol_ecoli | cusb_ecoli   |
| P0A9K3 | PHOL_ECOLI | *    | P0A9K3 | P00936 | phol_ecoli | cyaa_ecoli   |
| P0A9K3 | PHOL_ECOLI | *    | P0A9K3 | P0ACF0 | phol_ecoli | dbha_ecoli   |
| P0A9K3 | PHOL_ECOLI | *    | P0A9K3 | P0A9P6 | phol_ecoli | dead_ecoli   |
| P0A9K3 | PHOL_ECOLI | *    | P0A9K3 | P0A9P0 | phol_ecoli | dldh_ecoli   |
| P0A9K3 | PHOL_ECOLI | *    | P0A9K3 | P0A9P0 | phol_ecoli | dldh_ecoli   |
| P0A9K3 | PHOL_ECOLI | *    | P0A9K3 | P0A6Q6 | phol_ecoli | fabz_ecoli   |
| P0A9K3 | PHOL_ECOLI | *    | P0A9K3 | P0A9A9 | phol_ecoli | fur_ecoli    |
| P0A9K3 | PHOL_ECOLI | *    | P0A9K3 | P06993 | phol_ecoli | malt_ecoli   |
| P0A9K3 | PHOL_ECOLI | *    | P0A9K3 | Q46877 | phol_ecoli | norv_ecoli   |
| P0A9K3 | PHOL_ECOLI | *    | P0A9K3 | P0AFG8 | phol_ecoli | odp1_ecoli   |
| P0A9K3 | PHOL_ECOLI | *    | P0A9K3 | P06959 | phol_ecoli | odp2_ecoli   |
| P0A9K3 | PHOL_ECOLI | *    | P0A9K3 | P06959 | phol_ecoli | odp2_ecoli   |
| P0A9K3 | PHOL_ECOLI | *    | P0A9K3 | P23830 | phol_ecoli | pss_ecoli    |
| P0A9K3 | PHOL_ECOLI | *    | P0A9K3 | Q9F560 | phol_ecoli | q9f560_ecolx |
| P0A9K3 | PHOL_ECOLI | *    | P0A9K3 | P0A7L0 | phol_ecoli | rl1_ecoli    |
| P0A9K3 | PHOL_ECOLI | *    | P0A9K3 | P0A7L0 | phol_ecoli | rl1_ecoli    |
| P0A9K3 | PHOL_ECOLI | *    | P0A9K3 | P0A7J3 | phol_ecoli | rl10_ecoli   |
| P0A9K3 | PHOL_ECOLI | *    | P0A9K3 | P0AA10 | phol_ecoli | rl13_ecoli   |
| P0A9K3 | PHOL_ECOLI | *    | P0A9K3 | P0AA10 | phol_ecoli | rl13_ecoli   |

|        |            |   |        |        |            |            |
|--------|------------|---|--------|--------|------------|------------|
| P0A9K3 | PHOL_ECOLI | * | P0A9K3 | P02413 | phol_ecoli | rl15_ecoli |
| P0A9K3 | PHOL_ECOLI | * | P0A9K3 | P0ADY7 | phol_ecoli | rl16_ecoli |
| P0A9K3 | PHOL_ECOLI | * | P0A9K3 | P0A7K6 | phol_ecoli | rl19_ecoli |
| P0A9K3 | PHOL_ECOLI | * | P0A9K3 | P0A7K6 | phol_ecoli | rl19_ecoli |
| P0A9K3 | PHOL_ECOLI | * | P0A9K3 | P60422 | phol_ecoli | rl2_ecoli  |
| P0A9K3 | PHOL_ECOLI | * | P0A9K3 | P0A7L3 | phol_ecoli | rl20_ecoli |
| P0A9K3 | PHOL_ECOLI | * | P0A9K3 | P0AG48 | phol_ecoli | rl21_ecoli |
| P0A9K3 | PHOL_ECOLI | * | P0A9K3 | P61175 | phol_ecoli | rl22_ecoli |
| P0A9K3 | PHOL_ECOLI | * | P0A9K3 | P61175 | phol_ecoli | rl22_ecoli |
| P0A9K3 | PHOL_ECOLI | * | P0A9K3 | P60624 | phol_ecoli | rl24_ecoli |
| P0A9K3 | PHOL_ECOLI | * | P0A9K3 | P60624 | phol_ecoli | rl24_ecoli |
| P0A9K3 | PHOL_ECOLI | * | P0A9K3 | P68919 | phol_ecoli | rl25_ecoli |
| P0A9K3 | PHOL_ECOLI | * | P0A9K3 | P0A7M2 | phol_ecoli | rl28_ecoli |
| P0A9K3 | PHOL_ECOLI | * | P0A9K3 | P60438 | phol_ecoli | rl3_ecoli  |
| P0A9K3 | PHOL_ECOLI | * | P0A9K3 | P60438 | phol_ecoli | rl3_ecoli  |
| P0A9K3 | PHOL_ECOLI | * | P0A9K3 | P0A7N9 | phol_ecoli | rl33_ecoli |
| P0A9K3 | PHOL_ECOLI | * | P0A9K3 | P60723 | phol_ecoli | rl4_ecoli  |
| P0A9K3 | PHOL_ECOLI | * | P0A9K3 | P60723 | phol_ecoli | rl4_ecoli  |
| P0A9K3 | PHOL_ECOLI | * | P0A9K3 | P62399 | phol_ecoli | rl5_ecoli  |
| P0A9K3 | PHOL_ECOLI | * | P0A9K3 | P62399 | phol_ecoli | rl5_ecoli  |
| P0A9K3 | PHOL_ECOLI | * | P0A9K3 | P0AG55 | phol_ecoli | rl6_ecoli  |
| P0A9K3 | PHOL_ECOLI | * | P0A9K3 | P0AG55 | phol_ecoli | rl6_ecoli  |
| P0A9K3 | PHOL_ECOLI | * | P0A9K3 | P0A7K2 | phol_ecoli | rl7_ecoli  |
| P0A9K3 | PHOL_ECOLI | * | P0A9K3 | P0A7R1 | phol_ecoli | rl9_ecoli  |
| P0A9K3 | PHOL_ECOLI | * | P0A9K3 | P0A7R1 | phol_ecoli | rl9_ecoli  |
| P0A9K3 | PHOL_ECOLI | * | P0A9K3 | P75864 | phol_ecoli | rlml_ecoli |
| P0A9K3 | PHOL_ECOLI | * | P0A9K3 | P37765 | phol_ecoli | rlub_ecoli |
| P0A9K3 | PHOL_ECOLI | * | P0A9K3 | P21499 | phol_ecoli | rnr_ecoli  |
| P0A9K3 | PHOL_ECOLI | * | P0A9K3 | P0AG67 | phol_ecoli | rs1_ecoli  |
| P0A9K3 | PHOL_ECOLI | * | P0A9K3 | P0A7S9 | phol_ecoli | rs13_ecoli |
| P0A9K3 | PHOL_ECOLI | * | P0A9K3 | P0AG59 | phol_ecoli | rs14_ecoli |
| P0A9K3 | PHOL_ECOLI | * | P0A9K3 | P0A7T3 | phol_ecoli | rs16_ecoli |
| P0A9K3 | PHOL_ECOLI | * | P0A9K3 | P0A7V0 | phol_ecoli | rs2_ecoli  |
| P0A9K3 | PHOL_ECOLI | * | P0A9K3 | P0A7V0 | phol_ecoli | rs2_ecoli  |
| P0A9K3 | PHOL_ECOLI | * | P0A9K3 | P0A7U7 | phol_ecoli | rs20_ecoli |
| P0A9K3 | PHOL_ECOLI | * | P0A9K3 | P0A7V3 | phol_ecoli | rs3_ecoli  |
| P0A9K3 | PHOL_ECOLI | * | P0A9K3 | P0A7V8 | phol_ecoli | rs4_ecoli  |
| P0A9K3 | PHOL_ECOLI | * | P0A9K3 | P0A7W1 | phol_ecoli | rs5_ecoli  |
| P0A9K3 | PHOL_ECOLI | * | P0A9K3 | P0A7W1 | phol_ecoli | rs5_ecoli  |
| P0A9K3 | PHOL_ECOLI | * | P0A9K3 | P02359 | phol_ecoli | rs7_ecoli  |
| P0A9K3 | PHOL_ECOLI | * | P0A9K3 | P02359 | phol_ecoli | rs7_ecoli  |
| P0A9K3 | PHOL_ECOLI | * | P0A9K3 | P10408 | phol_ecoli | seca_ecoli |
| P0A9K3 | PHOL_ECOLI | * | P0A9K3 | P03018 | phol_ecoli | uvrd_ecoli |
| P0A9K3 | PHOL_ECOLI | * | P0A9K3 | P0AAS7 | phol_ecoli | ybcj_ecoli |
| P0A9K3 | PHOL_ECOLI | * | P0A9K3 | P39199 | phol_ecoli | yfcb_ecoli |

|        |             |   |        |        |             |            |
|--------|-------------|---|--------|--------|-------------|------------|
| P0A9K3 | PHOL_ECOLI  | * | P0A9K3 | P0AGJ5 | phol_ecoli  | yfif_ecoli |
| P0A9K3 | PHOL_ECOLI  | * | P0A9K3 | P0AGK4 | phol_ecoli  | yhby_ecoli |
| P23836 | PHOP_ECOLI  | * | P23836 | P0AAI3 | phop_ecoli  | ftsh_ecoli |
| P23836 | PHOP_ECOLI  | * | P23836 | P18843 | phop_ecoli  | nade_ecoli |
| P23836 | PHOP_ECOLI  | * | P23836 | P0AG55 | phop_ecoli  | rl6_ecoli  |
| P23836 | PHOP_ECOLI  | * | P23836 | P32167 | phop_ecoli  | yiix_ecoli |
| P00490 | PHSM_ECOLI  | * | P00490 | P0ACF0 | phsm_ecoli  | dbha_ecoli |
| P00490 | PHSM_ECOLI  | * | P00490 | P0A9P0 | phsm_ecoli  | dldh_ecoli |
| P00490 | PHSM_ECOLI  | * | P00490 | P0A9P0 | phsm_ecoli  | dldh_ecoli |
| P00490 | PHSM_ECOLI  | * | P00490 | P06959 | phsm_ecoli  | odp2_ecoli |
| P00490 | PHSM_ECOLI  | * | P00490 | P06959 | phsm_ecoli  | odp2_ecoli |
| P00490 | PHSM_ECOLI  | * | P00490 | P05055 | phsm_ecoli  | pnp_ecoli  |
| P00490 | PHSM_ECOLI  | * | P00490 | P0A7L0 | phsm_ecoli  | rl1_ecoli  |
| P00490 | PHSM_ECOLI  | * | P00490 | P0AA10 | phsm_ecoli  | rl13_ecoli |
| P00490 | PHSM_ECOLI  | * | P00490 | P0A7K6 | phsm_ecoli  | rl19_ecoli |
| P00490 | PHSM_ECOLI  | * | P00490 | P0AG48 | phsm_ecoli  | rl21_ecoli |
| P00490 | PHSM_ECOLI  | * | P00490 | P61175 | phsm_ecoli  | rl22_ecoli |
| P00490 | PHSM_ECOLI  | * | P00490 | P60438 | phsm_ecoli  | rl3_ecoli  |
| P00490 | PHSM_ECOLI  | * | P00490 | P60438 | phsm_ecoli  | rl3_ecoli  |
| P00490 | PHSM_ECOLI  | * | P00490 | P60723 | phsm_ecoli  | rl4_ecoli  |
| P00490 | PHSM_ECOLI  | * | P00490 | P0A7R1 | phsm_ecoli  | rl9_ecoli  |
| P00490 | PHSM_ECOLI  | * | P00490 | P0AGK4 | phsm_ecoli  | yhby_ecoli |
| Q46806 | PHYDA_ECOLI | * | Q46806 | P77674 | phyda_ecoli | abh_ecoli  |
| Q46806 | PHYDA_ECOLI | * | Q46806 | P0A6F5 | phyda_ecoli | ch60_ecoli |
| P0AFK0 | PMBA_ECOLI  | * | P0AFK0 | P0A6F5 | pmba_ecoli  | ch60_ecoli |
| P0AFK0 | PMBA_ECOLI  | * | P0AFK0 | P39343 | pmba_ecoli  | idnr_ecoli |
| P0AFK0 | PMBA_ECOLI  | * | P0AFK0 | P04391 | pmba_ecoli  | otc1_ecoli |
| P0AFK0 | PMBA_ECOLI  | * | P0AFK0 | P06960 | pmba_ecoli  | otc2_ecoli |
| P0AFK0 | PMBA_ECOLI  | * | P0AFK0 | P39389 | pmba_ecoli  | yjir_ecoli |
| P37590 | PMRD_ECOLI  | * | P37590 | P31678 | pmrd_ecoli  | otsh_ecoli |
| P37590 | PMRD_ECOLI  | * | P37590 | P15288 | pmrd_ecoli  | pepd_ecoli |
| P37590 | PMRD_ECOLI  | * | P37590 | P0AG44 | pmrd_ecoli  | rl17_ecoli |
| P37590 | PMRD_ECOLI  | * | P37590 | P60422 | pmrd_ecoli  | rl2_ecoli  |
| P37590 | PMRD_ECOLI  | * | P37590 | P0A7U3 | pmrd_ecoli  | rs19_ecoli |
| P37590 | PMRD_ECOLI  | * | P37590 | P0A7X3 | pmrd_ecoli  | rs9_ecoli  |
| P37590 | PMRD_ECOLI  | * | P37590 | P75694 | pmrd_ecoli  | yaho_ecoli |
| P37590 | PMRD_ECOLI  | * | P37590 | P76321 | pmrd_ecoli  | yedn_ecoli |
| P05055 | PNP_ECOLI   | * | P05055 | P0ACF0 | pnp_ecoli   | dbha_ecoli |
| P05055 | PNP_ECOLI   | * | P05055 | P0A6P9 | pnp_ecoli   | eno_ecoli  |

|        |           |   |        |        |                           |                            |
|--------|-----------|---|--------|--------|---------------------------|----------------------------|
| P05055 | PNP_ECOLI | * | P05055 | P0A6P9 | <a href="#">pnp_ecoli</a> | <a href="#">eno_ecoli</a>  |
| P05055 | PNP_ECOLI | * | P05055 | P0A817 | <a href="#">pnp_ecoli</a> | <a href="#">metk_ecoli</a> |
| P05055 | PNP_ECOLI | * | P05055 | P0A9X4 | <a href="#">pnp_ecoli</a> | <a href="#">mreb_ecoli</a> |
| P05055 | PNP_ECOLI | * | P05055 | P0A799 | <a href="#">pnp_ecoli</a> | <a href="#">pgk_ecoli</a>  |
| P05055 | PNP_ECOLI | * | P05055 | P0A7G6 | <a href="#">pnp_ecoli</a> | <a href="#">reca_ecoli</a> |
| P05055 | PNP_ECOLI | * | P05055 | P0A8J8 | <a href="#">pnp_ecoli</a> | <a href="#">rhlb_ecoli</a> |
| P05055 | PNP_ECOLI | * | P05055 | P0A8J8 | <a href="#">pnp_ecoli</a> | <a href="#">rhlb_ecoli</a> |
| P05055 | PNP_ECOLI | * | P05055 | P0A7L0 | <a href="#">pnp_ecoli</a> | <a href="#">rl1_ecoli</a>  |
| P05055 | PNP_ECOLI | * | P05055 | P0AA10 | <a href="#">pnp_ecoli</a> | <a href="#">rl13_ecoli</a> |
| P05055 | PNP_ECOLI | * | P05055 | P0AA10 | <a href="#">pnp_ecoli</a> | <a href="#">rl13_ecoli</a> |
| P05055 | PNP_ECOLI | * | P05055 | P02413 | <a href="#">pnp_ecoli</a> | <a href="#">rl15_ecoli</a> |
| P05055 | PNP_ECOLI | * | P05055 | P0AG44 | <a href="#">pnp_ecoli</a> | <a href="#">rl17_ecoli</a> |
| P05055 | PNP_ECOLI | * | P05055 | P60422 | <a href="#">pnp_ecoli</a> | <a href="#">rl2_ecoli</a>  |
| P05055 | PNP_ECOLI | * | P05055 | P0AG48 | <a href="#">pnp_ecoli</a> | <a href="#">rl21_ecoli</a> |
| P05055 | PNP_ECOLI | * | P05055 | P61175 | <a href="#">pnp_ecoli</a> | <a href="#">rl22_ecoli</a> |
| P05055 | PNP_ECOLI | * | P05055 | P60624 | <a href="#">pnp_ecoli</a> | <a href="#">rl24_ecoli</a> |
| P05055 | PNP_ECOLI | * | P05055 | P60723 | <a href="#">pnp_ecoli</a> | <a href="#">rl4_ecoli</a>  |
| P05055 | PNP_ECOLI | * | P05055 | P60723 | <a href="#">pnp_ecoli</a> | <a href="#">rl4_ecoli</a>  |
| P05055 | PNP_ECOLI | * | P05055 | P62399 | <a href="#">pnp_ecoli</a> | <a href="#">rl5_ecoli</a>  |
| P05055 | PNP_ECOLI | * | P05055 | P0AG55 | <a href="#">pnp_ecoli</a> | <a href="#">rl6_ecoli</a>  |
| P05055 | PNP_ECOLI | * | P05055 | P0A7R1 | <a href="#">pnp_ecoli</a> | <a href="#">rl9_ecoli</a>  |
| P05055 | PNP_ECOLI | * | P05055 | P0A7R1 | <a href="#">pnp_ecoli</a> | <a href="#">rl9_ecoli</a>  |
| P05055 | PNP_ECOLI | * | P05055 | P37765 | <a href="#">pnp_ecoli</a> | <a href="#">rlub_ecoli</a> |
| P05055 | PNP_ECOLI | * | P05055 | P21513 | <a href="#">pnp_ecoli</a> | <a href="#">rne_ecoli</a>  |
| P05055 | PNP_ECOLI | * | P05055 | P21513 | <a href="#">pnp_ecoli</a> | <a href="#">rne_ecoli</a>  |
| P05055 | PNP_ECOLI | * | P05055 | P21513 | <a href="#">pnp_ecoli</a> | <a href="#">rne_ecoli</a>  |
| P05055 | PNP_ECOLI | * | P05055 | P0A7Z4 | <a href="#">pnp_ecoli</a> | <a href="#">rpoa_ecoli</a> |
| P05055 | PNP_ECOLI | * | P05055 | P0A7S9 | <a href="#">pnp_ecoli</a> | <a href="#">rs13_ecoli</a> |
| P05055 | PNP_ECOLI | * | P05055 | P0A7S9 | <a href="#">pnp_ecoli</a> | <a href="#">rs13_ecoli</a> |
| P05055 | PNP_ECOLI | * | P05055 | P0ADZ4 | <a href="#">pnp_ecoli</a> | <a href="#">rs15_ecoli</a> |
| P05055 | PNP_ECOLI | * | P05055 | P0A7T7 | <a href="#">pnp_ecoli</a> | <a href="#">rs18_ecoli</a> |
| P05055 | PNP_ECOLI | * | P05055 | P0A7U3 | <a href="#">pnp_ecoli</a> | <a href="#">rs19_ecoli</a> |
| P05055 | PNP_ECOLI | * | P05055 | P0A7U7 | <a href="#">pnp_ecoli</a> | <a href="#">rs20_ecoli</a> |
| P05055 | PNP_ECOLI | * | P05055 | P0A7V3 | <a href="#">pnp_ecoli</a> | <a href="#">rs3_ecoli</a>  |
| P05055 | PNP_ECOLI | * | P05055 | P0A7V8 | <a href="#">pnp_ecoli</a> | <a href="#">rs4_ecoli</a>  |
| P05055 | PNP_ECOLI | * | P05055 | P0A7W1 | <a href="#">pnp_ecoli</a> | <a href="#">rs5_ecoli</a>  |
| P05055 | PNP_ECOLI | * | P05055 | P0A7W1 | <a href="#">pnp_ecoli</a> | <a href="#">rs5_ecoli</a>  |
| P05055 | PNP_ECOLI | * | P05055 | P02359 | <a href="#">pnp_ecoli</a> | <a href="#">rs7_ecoli</a>  |
| P05055 | PNP_ECOLI | * | P05055 | P02359 | <a href="#">pnp_ecoli</a> | <a href="#">rs7_ecoli</a>  |
| P05055 | PNP_ECOLI | * | P05055 | P21507 | <a href="#">pnp_ecoli</a> | <a href="#">srmb_ecoli</a> |

P07001 PNTA\_ECOLI

none

P0AFL1 POTI\_ECOLI

none

|        |            |      |        |        |            |            |
|--------|------------|------|--------|--------|------------|------------|
| P23869 | PPIB_ECOLI | *    | P23869 | P24182 | ppib_ecoli | accc_ecoli |
| P23869 | PPIB_ECOLI | *    | P23869 | P00722 | ppib_ecoli | bgal_ecoli |
| P23869 | PPIB_ECOLI | *    | P23869 | P0A6H1 | ppib_ecoli | clpx_ecoli |
| P23869 | PPIB_ECOLI | *    | P23869 | P0A6J5 | ppib_ecoli | dada_ecoli |
| P23869 | PPIB_ECOLI | *    | P23869 | P0A6Y8 | ppib_ecoli | dnak_ecoli |
| P23869 | PPIB_ECOLI | *    | P23869 | P0AAI3 | ppib_ecoli | ftsh_ecoli |
| P23869 | PPIB_ECOLI | *    | P23869 | P11553 | ppib_ecoli | fuck_ecoli |
| P23869 | PPIB_ECOLI | *    | P23869 | P13035 | ppib_ecoli | glpd_ecoli |
| P23869 | PPIB_ECOLI | *    | P23869 | P0ABC7 | ppib_ecoli | hflk_ecoli |
| P23869 | PPIB_ECOLI | *    | P23869 | P22523 | ppib_ecoli | mukb_ecoli |
| P23869 | PPIB_ECOLI | *    | P23869 | P09373 | ppib_ecoli | pflb_ecoli |
| P23869 | PPIB_ECOLI | *    | P23869 | P0A9M8 | ppib_ecoli | pta_ecoli  |
| P23869 | PPIB_ECOLI | *    | P23869 | P09546 | ppib_ecoli | puta_ecoli |
| P23869 | PPIB_ECOLI | *    | P23869 | P16918 | ppib_ecoli | rhsc_ecoli |
| P23869 | PPIB_ECOLI | *    | P23869 | P0ADY3 | ppib_ecoli | rl14_ecoli |
| P23869 | PPIB_ECOLI | *    | P23869 | P0A8V2 | ppib_ecoli | rpob_ecoli |
| P23869 | PPIB_ECOLI | *    | P23869 | P75817 | ppib_ecoli | rumb_ecoli |
| P23869 | PPIB_ECOLI | *    | P23869 | P76108 | ppib_ecoli | ydcs_ecoli |
| P23869 | PPIB_ECOLI | *    | P23869 | P0A8W8 | ppib_ecoli | yfbu_ecoli |
| P23869 | PPIB_ECOLI | *    | P23869 | P37659 | ppib_ecoli | yhju_ecoli |
| P23869 | PPIB_ECOLI | *    | P23869 | P0ADN2 | ppib_ecoli | yife_ecoli |
|        |            |      |        |        |            |            |
| P0A7B1 | PPK_ECOLI  | *    | P0A7B1 | P0ABE7 | ppk_ecoli  | c562_ecolx |
| P0A7B1 | PPK_ECOLI  | *    | P0A7B1 | P0A6F5 | ppk_ecoli  | ch60_ecoli |
| P0A7B1 | PPK_ECOLI  | *    | P0A7B1 | P0AC41 | ppk_ecoli  | dhsa_ecoli |
| P0A7B1 | PPK_ECOLI  | *    | P0A7B1 | P0A9P0 | ppk_ecoli  | dldh_ecoli |
| P0A7B1 | PPK_ECOLI  | *    | P0A7B1 | P06959 | ppk_ecoli  | odp2_ecoli |
| P0A7B1 | PPK_ECOLI  | *    | P0A7B1 | P64574 | ppk_ecoli  | yghw_ecoli |
| P0A7B1 | PPK_ECOLI  | *    | P0A7B1 | P0ADK8 | ppk_ecoli  | yibl_ecoli |
|        |            |      |        |        |            |            |
| P23538 | PPSA_ECOLI | *    | P23538 | P60422 | ppsa_ecoli | rl2_ecoli  |
|        |            |      |        |        |            |            |
| P23862 | PRIC_ECOLI | *    | P23862 | P0A7L0 | pric_ecoli | rl1_ecoli  |
| P23862 | PRIC_ECOLI | *    | P23862 | P60422 | pric_ecoli | rl2_ecoli  |
| P23862 | PRIC_ECOLI | *    | P23862 | P60438 | pric_ecoli | rl3_ecoli  |
| P23862 | PRIC_ECOLI | *    | P23862 | P0AG55 | pric_ecoli | rl6_ecoli  |
| P23862 | PRIC_ECOLI | *    | P23862 | P0AG67 | pric_ecoli | rs1_ecoli  |
| P23862 | PRIC_ECOLI | *    | P23862 | P0A7V8 | pric_ecoli | rs4_ecoli  |
| P23862 | PRIC_ECOLI | *    | P23862 | P02359 | pric_ecoli | rs7_ecoli  |
| P23862 | PRIC_ECOLI | *    | P23862 | P00959 | pric_ecoli | sym_ecoli  |
| P23862 | PRIC_ECOLI | *    | P23862 | P0ADE4 | pric_ecoli | ytfm_ecoli |
|        |            |      |        |        |            |            |
| P45577 | PROQ_ECOLI | none |        |        |            |            |
|        |            |      |        |        |            |            |
| P77243 | PRPD_ECOLI | *    | P77243 | P0A6F5 | prpd_ecoli | ch60_ecoli |



|        |            |   |        |        |                            |                             |
|--------|------------|---|--------|--------|----------------------------|-----------------------------|
| P77243 | PRPD_ECOLI | * | P77243 | P18843 | <a href="#">prpd_ecoli</a> | <a href="#">nade_ecoli</a>  |
| P37344 | PSPF_ECOLI | * | P37344 | P33940 | <a href="#">pspf_ecoli</a> | <a href="#">mqo_ecoli</a>   |
| P37344 | PSPF_ECOLI | * | P37344 | P45548 | <a href="#">pspf_ecoli</a> | <a href="#">php_ecoli</a>   |
| P23830 | PSS_ECOLI  | * | P23830 | P05055 | <a href="#">pss_ecoli</a>  | <a href="#">pnp_ecoli</a>   |
| P23830 | PSS_ECOLI  | * | P23830 | P0ADY1 | <a href="#">pss_ecoli</a>  | <a href="#">ppid_ecoli</a>  |
| P23830 | PSS_ECOLI  | * | P23830 | P0AFL6 | <a href="#">pss_ecoli</a>  | <a href="#">ppx_ecoli</a>   |
| P23830 | PSS_ECOLI  | * | P23830 | P0A7L0 | <a href="#">pss_ecoli</a>  | <a href="#">rl1_ecoli</a>   |
| P23830 | PSS_ECOLI  | * | P23830 | P0AG44 | <a href="#">pss_ecoli</a>  | <a href="#">rl17_ecoli</a>  |
| P23830 | PSS_ECOLI  | * | P23830 | P60422 | <a href="#">pss_ecoli</a>  | <a href="#">rl2_ecoli</a>   |
| P23830 | PSS_ECOLI  | * | P23830 | P0AG48 | <a href="#">pss_ecoli</a>  | <a href="#">rl21_ecoli</a>  |
| P23830 | PSS_ECOLI  | * | P23830 | P0ADZ0 | <a href="#">pss_ecoli</a>  | <a href="#">rl23_ecoli</a>  |
| P23830 | PSS_ECOLI  | * | P23830 | P60438 | <a href="#">pss_ecoli</a>  | <a href="#">rl3_ecoli</a>   |
| P23830 | PSS_ECOLI  | * | P23830 | P0A7K2 | <a href="#">pss_ecoli</a>  | <a href="#">rl7_ecoli</a>   |
| P23830 | PSS_ECOLI  | * | P23830 | P75864 | <a href="#">pss_ecoli</a>  | <a href="#">rlml_ecoli</a>  |
| P23830 | PSS_ECOLI  | * | P23830 | P0AG67 | <a href="#">pss_ecoli</a>  | <a href="#">rs1_ecoli</a>   |
| P23830 | PSS_ECOLI  | * | P23830 | P0A7S9 | <a href="#">pss_ecoli</a>  | <a href="#">rs13_ecoli</a>  |
| P23830 | PSS_ECOLI  | * | P23830 | P0AG59 | <a href="#">pss_ecoli</a>  | <a href="#">rs14_ecoli</a>  |
| P23830 | PSS_ECOLI  | * | P23830 | P0A7V0 | <a href="#">pss_ecoli</a>  | <a href="#">rs2_ecoli</a>   |
| P23830 | PSS_ECOLI  | * | P23830 | P68679 | <a href="#">pss_ecoli</a>  | <a href="#">rs21_ecoli</a>  |
| P23830 | PSS_ECOLI  | * | P23830 | P0A7V3 | <a href="#">pss_ecoli</a>  | <a href="#">rs3_ecoli</a>   |
| P23830 | PSS_ECOLI  | * | P23830 | P0A7V8 | <a href="#">pss_ecoli</a>  | <a href="#">rs4_ecoli</a>   |
| P23830 | PSS_ECOLI  | * | P23830 | P0A7V8 | <a href="#">pss_ecoli</a>  | <a href="#">rs4_ecoli</a>   |
| P23830 | PSS_ECOLI  | * | P23830 | P0A7W1 | <a href="#">pss_ecoli</a>  | <a href="#">rs5_ecoli</a>   |
| P23830 | PSS_ECOLI  | * | P23830 | P02359 | <a href="#">pss_ecoli</a>  | <a href="#">rs7_ecoli</a>   |
| P23830 | PSS_ECOLI  | * | P23830 | P0AGJ5 | <a href="#">pss_ecoli</a>  | <a href="#">yfif_ecoli</a>  |
| P23830 | PSS_ECOLI  | * | P23830 | P64574 | <a href="#">pss_ecoli</a>  | <a href="#">yghw_ecoli</a>  |
| P08839 | PT1_ECOLI  | * | P08839 | P08622 | <a href="#">pt1_ecoli</a>  | <a href="#">dnaj_ecoli</a>  |
| P08839 | PT1_ECOLI  | * | P08839 | P0AEJ2 | <a href="#">pt1_ecoli</a>  | <a href="#">entc_ecoli</a>  |
| P08839 | PT1_ECOLI  | * | P08839 | P10121 | <a href="#">pt1_ecoli</a>  | <a href="#">ftsy_ecoli</a>  |
| P08839 | PT1_ECOLI  | * | P08839 | P18843 | <a href="#">pt1_ecoli</a>  | <a href="#">nade_ecoli</a>  |
| P08839 | PT1_ECOLI  | * | P08839 | P0ACP7 | <a href="#">pt1_ecoli</a>  | <a href="#">purr_ecoli</a>  |
| P0A9M8 | PTA_ECOLI  | * | P0A9M8 | P0A6E4 | <a href="#">pta_ecoli</a>  | <a href="#">assy_ecoli</a>  |
| P0A9M8 | PTA_ECOLI  | * | P0A9M8 | P08365 | <a href="#">pta_ecoli</a>  | <a href="#">chps_ecoli</a>  |
| P0A9M8 | PTA_ECOLI  | * | P0A9M8 | P08622 | <a href="#">pta_ecoli</a>  | <a href="#">dnaj_ecoli</a>  |
| P0A9M8 | PTA_ECOLI  | * | P0A9M8 | P0CE47 | <a href="#">pta_ecoli</a>  | <a href="#">eftu1_ecoli</a> |
| P0A9M8 | PTA_ECOLI  | * | P0A9M8 | P0ACC7 | <a href="#">pta_ecoli</a>  | <a href="#">glmu_ecoli</a>  |
| P0A9M8 | PTA_ECOLI  | * | P0A9M8 | P18843 | <a href="#">pta_ecoli</a>  | <a href="#">nade_ecoli</a>  |
| P0A9M8 | PTA_ECOLI  | * | P0A9M8 | P0ABL5 | <a href="#">pta_ecoli</a>  | <a href="#">napc_ecoli</a>  |
| P0A9M8 | PTA_ECOLI  | * | P0A9M8 | P0A772 | <a href="#">pta_ecoli</a>  | <a href="#">nrndi_ecoli</a> |
| P0A9M8 | PTA_ECOLI  | * | P0A9M8 | P0AFD1 | <a href="#">pta_ecoli</a>  | <a href="#">nuoe_ecoli</a>  |
| P0A9M8 | PTA_ECOLI  | * | P0A9M8 | P09546 | <a href="#">pta_ecoli</a>  | <a href="#">puta_ecoli</a>  |

|        |             |   |        |        |             |             |
|--------|-------------|---|--------|--------|-------------|-------------|
| P0A9M8 | PTA_ECOLI   | * | P0A9M8 | P65870 | pta_ecoli   | qued_ecoli  |
| P0A9M8 | PTA_ECOLI   | * | P0A9M8 | P16918 | pta_ecoli   | rhsc_ecoli  |
| P0A9M8 | PTA_ECOLI   | * | P0A9M8 | P0AG55 | pta_ecoli   | rl6_ecoli   |
| P0A9M8 | PTA_ECOLI   | * | P0A9M8 | P0A850 | pta_ecoli   | tig_ecoli   |
| P0A9M8 | PTA_ECOLI   | * | P0A9M8 | P31827 | pta_ecoli   | yddb_ecoli  |
| P0A9M8 | PTA_ECOLI   | * | P0A9M8 | P76150 | pta_ecoli   | ynek_ecoli  |
| P32670 | PTFX2_ECOLI |   | none   |        |             |             |
| P69783 | PTGA_ECOLI  | * | P69783 | P69786 | ptga_ecoli  | ptgcb_ecoli |
| P69783 | PTGA_ECOLI  | * | P69783 | P0AA04 | ptga_ecoli  | pthp_ecoli  |
| P05706 | PTHA_ECOLI  | * | P05706 | P77398 | ptha_ecoli  | arna_ecoli  |
| P05706 | PTHA_ECOLI  | * | P05706 | P0AES0 | ptha_ecoli  | gsp_ecoli   |
| P05706 | PTHA_ECOLI  | * | P05706 | P76104 | ptha_ecoli  | ydcg_ecoli  |
| P0AA04 | PTHP_ECOLI  | * | P0AA04 | P08839 | pthp_ecoli  | pt1_ecoli   |
| P69828 | PTKA_ECOLI  |   | none   |        |             |             |
| P37188 | PTKB_ECOLI  | * | P37188 | P06961 | ptkb_ecoli  | cca_ecoli   |
| P37188 | PTKB_ECOLI  | * | P37188 | P0CE47 | ptkb_ecoli  | eftu1_ecoli |
| P37188 | PTKB_ECOLI  | * | P37188 | P76092 | ptkb_ecoli  | ynbc_ecoli  |
| P69797 | PTNAB_ECOLI | * | P69797 | P0ACN7 | ptnab_ecoli | cytr_ecoli  |
| P69797 | PTNAB_ECOLI | * | P69797 | P0A799 | ptnab_ecoli | pgk_ecoli   |
| P69797 | PTNAB_ECOLI | * | P69797 | P69801 | ptnab_ecoli | ptnc_ecoli  |
| P69797 | PTNAB_ECOLI | * | P69797 | P69805 | ptnab_ecoli | ptnd_ecoli  |
| P69797 | PTNAB_ECOLI | * | P69797 | P24230 | ptnab_ecoli | recg_ecoli  |
| P69797 | PTNAB_ECOLI | * | P69797 | P61175 | ptnab_ecoli | rl22_ecoli  |
| P69797 | PTNAB_ECOLI | * | P69797 | P0A7M2 | ptnab_ecoli | rl28_ecoli  |
| P69797 | PTNAB_ECOLI | * | P69797 | P30864 | ptnab_ecoli | yafo_ecoli  |
| P69795 | PTQB_ECOLI  |   | none   |        |             |             |
| P17334 | PTQC_ECOLI  |   | none   |        |             |             |
| P69829 | PTSN_ECOLI  | * | P69829 | P0AAN1 | ptsn_ecoli  | hybe_ecoli  |
| P0A7D7 | PUR7_ECOLI  | * | P0A7D7 | P06961 | pur7_ecoli  | cca_ecoli   |
| P0A7D7 | PUR7_ECOLI  | * | P0A7D7 | P0A6Y8 | pur7_ecoli  | dnak_ecoli  |
| P0A7D7 | PUR7_ECOLI  | * | P0A7D7 | P0A6Y8 | pur7_ecoli  | dnak_ecoli  |
| P0A7D7 | PUR7_ECOLI  | * | P0A7D7 | P0ACZ4 | pur7_ecoli  | evga_ecoli  |
| P0A7D7 | PUR7_ECOLI  | * | P0A7D7 | P60560 | pur7_ecoli  | guac_ecoli  |
| P0A7D7 | PUR7_ECOLI  | * | P0A7D7 | P30015 | pur7_ecoli  | lhr_ecoli   |

|        |            |   |        |        |                            |                             |
|--------|------------|---|--------|--------|----------------------------|-----------------------------|
| P0A7D7 | PUR7_ECOLI | * | P0A7D7 | P0A850 | <a href="#">pur7_ecoli</a> | <a href="#">tig_ecoli</a>   |
| P0A7D7 | PUR7_ECOLI | * | P0A7D7 | P0A850 | <a href="#">pur7_ecoli</a> | <a href="#">tig_ecoli</a>   |
| P0A7D7 | PUR7_ECOLI | * | P0A7D7 | P31463 | <a href="#">pur7_ecoli</a> | <a href="#">yidz_ecoli</a>  |
| P0A7D4 | PURA_ECOLI | * | P0A7D4 | P38104 | <a href="#">pura_ecoli</a> | <a href="#">rspa_ecoli</a>  |
| P0ACP7 | PURR_ECOLI |   | none   |        |                            |                             |
| P09546 | PUTA_ECOLI | * | P09546 | P0A6F5 | <a href="#">puta_ecoli</a> | <a href="#">ch60_ecoli</a>  |
| P09546 | PUTA_ECOLI | * | P09546 | P0A6Y8 | <a href="#">puta_ecoli</a> | <a href="#">dnak_ecoli</a>  |
| P09546 | PUTA_ECOLI | * | P09546 | P0ABF4 | <a href="#">puta_ecoli</a> | <a href="#">eutm_ecoli</a>  |
| P09546 | PUTA_ECOLI | * | P09546 | P60293 | <a href="#">puta_ecoli</a> | <a href="#">mukf_ecoli</a>  |
| P09546 | PUTA_ECOLI | * | P09546 | P33230 | <a href="#">puta_ecoli</a> | <a href="#">ydac_ecoli</a>  |
| P09546 | PUTA_ECOLI | * | P09546 | P76464 | <a href="#">puta_ecoli</a> | <a href="#">yfas_ecoli</a>  |
| P09546 | PUTA_ECOLI | * | P09546 | P63389 | <a href="#">puta_ecoli</a> | <a href="#">yhes_ecoli</a>  |
| P08244 | PYRF_ECOLI |   | none   |        |                            |                             |
| P0A7E5 | PYRG_ECOLI | * | P0A7E5 | P31658 | <a href="#">pyrg_ecoli</a> | <a href="#">hcha_ecoli</a>  |
| P0A7E5 | PYRG_ECOLI | * | P0A7E5 | P18843 | <a href="#">pyrg_ecoli</a> | <a href="#">nade_ecoli</a>  |
| P0A7E5 | PYRG_ECOLI | * | P0A7E5 | P0A8V2 | <a href="#">pyrg_ecoli</a> | <a href="#">rpob_ecoli</a>  |
| P0A7E5 | PYRG_ECOLI | * | P0A7E5 | P0A8T7 | <a href="#">pyrg_ecoli</a> | <a href="#">rpoc_ecoli</a>  |
| P0A7E5 | PYRG_ECOLI | * | P0A7E5 | P08956 | <a href="#">pyrg_ecoli</a> | <a href="#">t1rk_ecoli</a>  |
| P0A7E5 | PYRG_ECOLI | * | P0A7E5 | P75736 | <a href="#">pyrg_ecoli</a> | <a href="#">ybff_ecoli</a>  |
| P28304 | QOR1_ECOLI | * | P28304 | P0A6Y8 | <a href="#">qor1_ecoli</a> | <a href="#">dnak_ecoli</a>  |
| P28304 | QOR1_ECOLI | * | P28304 | P36767 | <a href="#">qor1_ecoli</a> | <a href="#">rdgc_ecoli</a>  |
| P77756 | QUEC_ECOLI | * | P77756 | P33224 | <a href="#">quec_ecoli</a> | <a href="#">aidb_ecoli</a>  |
| P77756 | QUEC_ECOLI | * | P77756 | P00722 | <a href="#">quec_ecoli</a> | <a href="#">bgal_ecoli</a>  |
| P77756 | QUEC_ECOLI | * | P77756 | P0A6Y8 | <a href="#">quec_ecoli</a> | <a href="#">dnak_ecoli</a>  |
| P77756 | QUEC_ECOLI | * | P77756 | P0A6Y8 | <a href="#">quec_ecoli</a> | <a href="#">dnak_ecoli</a>  |
| P77756 | QUEC_ECOLI | * | P77756 | P0CE47 | <a href="#">quec_ecoli</a> | <a href="#">eftu1_ecoli</a> |
| P77756 | QUEC_ECOLI | * | P77756 | P0CE47 | <a href="#">quec_ecoli</a> | <a href="#">eftu1_ecoli</a> |
| P77756 | QUEC_ECOLI | * | P77756 | P13035 | <a href="#">quec_ecoli</a> | <a href="#">glpd_ecoli</a>  |
| P77756 | QUEC_ECOLI | * | P77756 | P68066 | <a href="#">quec_ecoli</a> | <a href="#">grca_ecoli</a>  |
| P77756 | QUEC_ECOLI | * | P77756 | P0A6B7 | <a href="#">quec_ecoli</a> | <a href="#">iscs_ecoli</a>  |
| P77756 | QUEC_ECOLI | * | P77756 | P22523 | <a href="#">quec_ecoli</a> | <a href="#">mukb_ecoli</a>  |
| P77756 | QUEC_ECOLI | * | P77756 | P0A9I5 | <a href="#">quec_ecoli</a> | <a href="#">napd_ecoli</a>  |
| P77756 | QUEC_ECOLI | * | P77756 | P19319 | <a href="#">quec_ecoli</a> | <a href="#">narz_ecoli</a>  |
| P77756 | QUEC_ECOLI | * | P77756 | P0A7K2 | <a href="#">quec_ecoli</a> | <a href="#">rl7_ecoli</a>   |
| P77756 | QUEC_ECOLI | * | P77756 | P0A7R5 | <a href="#">quec_ecoli</a> | <a href="#">rs10_ecoli</a>  |
| P77756 | QUEC_ECOLI | * | P77756 | P0AG24 | <a href="#">quec_ecoli</a> | <a href="#">spot_ecoli</a>  |
| P77756 | QUEC_ECOLI | * | P77756 | P76417 | <a href="#">quec_ecoli</a> | <a href="#">yegt_ecoli</a>  |

|        |            |          |        |            |             |
|--------|------------|----------|--------|------------|-------------|
| P16551 | RAFA_ECOLX | none     |        |            |             |
| P16552 | RAFB_ECOLX | none     |        |            |             |
| P60240 | RAPA_ECOLI | * P60240 | Q47153 | rapa_ecoli | fhia_ecoli  |
| P60240 | RAPA_ECOLI | * P60240 | P0AFF6 | rapa_ecoli | nusa_ecoli  |
| P60240 | RAPA_ECOLI | * P60240 | P60438 | rapa_ecoli | rl3_ecoli   |
| P60240 | RAPA_ECOLI | * P60240 | P0A7Z4 | rapa_ecoli | rpoa_ecoli  |
| P60240 | RAPA_ECOLI | * P60240 | P0A8V2 | rapa_ecoli | rpob_ecoli  |
| P60240 | RAPA_ECOLI | * P60240 | P0A8T7 | rapa_ecoli | rpoc_ecoli  |
| P60240 | RAPA_ECOLI | * P60240 | P0A8T7 | rapa_ecoli | rpoc_ecoli  |
| P60240 | RAPA_ECOLI | * P60240 | P0A7W1 | rapa_ecoli | rs5_ecoli   |
| P60240 | RAPA_ECOLI | * P60240 | P76464 | rapa_ecoli | yfas_ecoli  |
| P60240 | RAPA_ECOLI | * P60240 | P77196 | rapa_ecoli | yfcu_ecoli  |
| P0A7G2 | RBFA_ECOLI | * P0A7G2 | P18843 | rbfa_ecoli | nade_ecoli  |
| P02925 | RBSB_ECOLI | * P02925 | P0A6Y8 | rbsb_ecoli | dnak_ecoli  |
| P02925 | RBSB_ECOLI | * P02925 | P22731 | rbsb_ecoli | livf_ecoli  |
| P02925 | RBSB_ECOLI | * P02925 | P18843 | rbsb_ecoli | nade_ecoli  |
| P02925 | RBSB_ECOLI | * P02925 | P16684 | rbsb_ecoli | phnf_ecoli  |
| P02925 | RBSB_ECOLI | * P02925 | P60723 | rbsb_ecoli | rl4_ecoli   |
| P0A9J6 | RBSK_ECOLI | * P0A9J6 | P0AA16 | rbsk_ecoli | ompr_ecoli  |
| P69407 | RCSB_ECOLI | * P69407 | P0ABB8 | rcsb_ecoli | atma_ecoli  |
| P69407 | RCSB_ECOLI | * P69407 | P77808 | rcsb_ecoli | cinal_ecoli |
| P69407 | RCSB_ECOLI | * P69407 | P0ACJ8 | rcsb_ecoli | crp_ecoli   |
| P69407 | RCSB_ECOLI | * P69407 | P0A6Y8 | rcsb_ecoli | dnak_ecoli  |
| P69407 | RCSB_ECOLI | * P69407 | P00582 | rcsb_ecoli | dpo1_ecoli  |
| P69407 | RCSB_ECOLI | * P69407 | P0CE47 | rcsb_ecoli | eftu1_ecoli |
| P69407 | RCSB_ECOLI | * P69407 | P38134 | rcsb_ecoli | etk_ecoli   |
| P69407 | RCSB_ECOLI | * P69407 | P63204 | rcsb_ecoli | gade_ecoli  |
| P69407 | RCSB_ECOLI | * P69407 | P75882 | rcsb_ecoli | gfcd_ecoli  |
| P69407 | RCSB_ECOLI | * P69407 | P0A9Z1 | rcsb_ecoli | glnb_ecoli  |
| P69407 | RCSB_ECOLI | * P69407 | P33231 | rcsb_ecoli | lldp_ecoli  |
| P69407 | RCSB_ECOLI | * P69407 | P0A8T1 | rcsb_ecoli | prma_ecoli  |
| P69407 | RCSB_ECOLI | * P69407 | P39838 | rcsb_ecoli | rcsd_ecoli  |
| P69407 | RCSB_ECOLI | * P69407 | P77215 | rcsb_ecoli | rhmd_ecoli  |
| P69407 | RCSB_ECOLI | * P69407 | P0AA10 | rcsb_ecoli | rl13_ecoli  |
| P69407 | RCSB_ECOLI | * P69407 | P0AA10 | rcsb_ecoli | rl13_ecoli  |
| P69407 | RCSB_ECOLI | * P69407 | P0A7K6 | rcsb_ecoli | rl19_ecoli  |
| P69407 | RCSB_ECOLI | * P69407 | P61175 | rcsb_ecoli | rl22_ecoli  |
| P69407 | RCSB_ECOLI | * P69407 | P0A7M2 | rcsb_ecoli | rl28_ecoli  |
| P69407 | RCSB_ECOLI | * P69407 | P60438 | rcsb_ecoli | rl3_ecoli   |
| P69407 | RCSB_ECOLI | * P69407 | P62399 | rcsb_ecoli | rl5_ecoli   |

|        |            |   |        |        |            |             |
|--------|------------|---|--------|--------|------------|-------------|
| P69407 | RCSB_ECOLI | * | P69407 | P0A7R1 | rccb_ecoli | rl9_ecoli   |
| P69407 | RCSB_ECOLI | * | P69407 | P0A7Z4 | rccb_ecoli | rpoa_ecoli  |
| P69407 | RCSB_ECOLI | * | P69407 | P0A7R5 | rccb_ecoli | rs10_ecoli  |
| P69407 | RCSB_ECOLI | * | P69407 | P68679 | rccb_ecoli | rs21_ecoli  |
| P69407 | RCSB_ECOLI | * | P69407 | P0A7V3 | rccb_ecoli | rs3_ecoli   |
| P69407 | RCSB_ECOLI | * | P69407 | P0A7V3 | rccb_ecoli | rs3_ecoli   |
| P69407 | RCSB_ECOLI | * | P69407 | P0A7V8 | rccb_ecoli | rs4_ecoli   |
| P69407 | RCSB_ECOLI | * | P69407 | P80645 | rccb_ecoli | ssud_ecoli  |
| P69407 | RCSB_ECOLI | * | P69407 | P52097 | rccb_ecoli | tils_ecoli  |
| P69407 | RCSB_ECOLI | * | P69407 | P37007 | rccb_ecoli | yaga_ecoli  |
| P69407 | RCSB_ECOLI | * | P69407 | P76243 | rccb_ecoli | yeao_ecoli  |
| P69407 | RCSB_ECOLI | * | P69407 | Q46811 | rccb_ecoli | ygfk_ecoli  |
| P69407 | RCSB_ECOLI | * | P69407 | P37655 | rccb_ecoli | yhjq_ecoli  |
|        |            |   |        |        |            |             |
| P52061 | RDGB_ECOLI | * | P52061 | P0AFG0 | rdgb_ecoli | nusg_ecoli  |
| P52061 | RDGB_ECOLI | * | P52061 | P37095 | rdgb_ecoli | pepb_ecoli  |
| P52061 | RDGB_ECOLI | * | P52061 | P25535 | rdgb_ecoli | visc_ecoli  |
|        |            |   |        |        |            |             |
| P36767 | RDGC_ECOLI | * | P36767 | P0A717 | rdgc_ecoli | kprs_ecoli  |
|        |            |   |        |        |            |             |
| P0A7G6 | RECA_ECOLI | * | P0A7G6 | P18843 | reca_ecoli | nade_ecoli  |
| P0A7G6 | RECA_ECOLI | * | P0A7G6 | P0ABL5 | reca_ecoli | napc_ecoli  |
| P0A7G6 | RECA_ECOLI | * | P0A7G6 | P0A7J3 | reca_ecoli | rl10_ecoli  |
| P0A7G6 | RECA_ECOLI | * | P0A7G6 | P60422 | reca_ecoli | rl2_ecoli   |
| P0A7G6 | RECA_ECOLI | * | P0A7G6 | P64548 | reca_ecoli | yfir_ecoli  |
|        |            |   |        |        |            |             |
| P0AG20 | RELA_ECOLI | * | P0AG20 | P36683 | rela_ecoli | acon2_ecoli |
| P0AG20 | RELA_ECOLI | * | P0AG20 | P0A9Q7 | rela_ecoli | adhe_ecoli  |
| P0AG20 | RELA_ECOLI | * | P0AG20 | P45565 | rela_ecoli | ais_ecoli   |
| P0AG20 | RELA_ECOLI | * | P0AG20 | P0A951 | rela_ecoli | atda_ecoli  |
| P0AG20 | RELA_ECOLI | * | P0AG20 | P0A9A2 | rela_ecoli | ftnb_ecoli  |
| P0AG20 | RELA_ECOLI | * | P0AG20 | P33345 | rela_ecoli | molr_ecoli  |
| P0AG20 | RELA_ECOLI | * | P0AG20 | P0AFG8 | rela_ecoli | odp1_ecoli  |
| P0AG20 | RELA_ECOLI | * | P0AG20 | P0A7K6 | rela_ecoli | rl19_ecoli  |
| P0AG20 | RELA_ECOLI | * | P0AG20 | P60422 | rela_ecoli | rl2_ecoli   |
| P0AG20 | RELA_ECOLI | * | P0AG20 | P60723 | rela_ecoli | rl4_ecoli   |
| P0AG20 | RELA_ECOLI | * | P0AG20 | P0A7S9 | rela_ecoli | rs13_ecoli  |
| P0AG20 | RELA_ECOLI | * | P0AG20 | P0A9K9 | rela_ecoli | slyd_ecoli  |
| P0AG20 | RELA_ECOLI | * | P0AG20 | P75869 | rela_ecoli | sxy_ecoli   |
|        |            |   |        |        |            |             |
| P09980 | REP_ECOLI  |   | none   |        |            |             |
|        |            |   |        |        |            |             |
| P05833 | REPA_ECOLX |   | none   |        |            |             |
|        |            |   |        |        |            |             |
| P07012 | RF2_ECOLI  | * | P07012 | P0ABL8 | rf2_ecoli  | ccmb_ecoli  |

|        |             |      |        |        |            |            |
|--------|-------------|------|--------|--------|------------|------------|
| P07012 | RF2_ECOLI   | *    | P07012 | P0ACF0 | rf2_ecoli  | dbha_ecoli |
| P07012 | RF2_ECOLI   | *    | P07012 | P0ACF4 | rf2_ecoli  | dbhb_ecoli |
| P07012 | RF2_ECOLI   | *    | P07012 | P05852 | rf2_ecoli  | gcp_ecoli  |
| P07012 | RF2_ECOLI   | *    | P07012 | P75959 | rf2_ecoli  | nagk_ecoli |
| P07012 | RF2_ECOLI   | *    | P07012 | P20083 | rf2_ecoli  | pare_ecoli |
| P07012 | RF2_ECOLI   | *    | P07012 | P0A7Z4 | rf2_ecoli  | rpoa_ecoli |
| P07012 | RF2_ECOLI   | *    | P07012 | P39301 | rf2_ecoli  | ulaa_ecoli |
| P07012 | RF2_ECOLI   | *    | P07012 | P0AC78 | rf2_ecoli  | weca_ecoli |
| P07012 | RF2_ECOLI   | *    | P07012 | P76440 | rf2_ecoli  | yeit_ecoli |
| P07012 | RF2_ECOLI   | *    | P07012 | P32704 | rf2_ecoli  | yjcf_ecoli |
| P07012 | RF2_ECOLI   | *    | P07012 | P77374 | rf2_ecoli  | ynfe_ecoli |
|        |             |      |        |        |            |            |
| P0A7I4 | RF3_ECOLI   | *    | P0A7I4 | P0AES6 | rf3_ecoli  | gyrb_ecoli |
| P0A7I4 | RF3_ECOLI   | *    | P0A7I4 | P0A832 | rf3_ecoli  | ssrp_ecoli |
| P0A7I4 | RF3_ECOLI   | *    | P0A7I4 | P0A847 | rf3_ecoli  | tgt_ecoli  |
|        |             |      |        |        |            |            |
| P27127 | RFAB_ECOLI  | *    | P27127 | P60422 | rfab_ecoli | rl2_ecoli  |
|        |             |      |        |        |            |            |
| P37692 | RFAF_ECOLI  | *    | P37692 | P03960 | rfaf_ecoli | atkb_ecoli |
| P37692 | RFAF_ECOLI  | *    | P37692 | P0A6F5 | rfaf_ecoli | ch60_ecoli |
| P37692 | RFAF_ECOLI  | *    | P37692 | P0A6Z3 | rfaf_ecoli | htpg_ecoli |
| P37692 | RFAF_ECOLI  | *    | P37692 | P0A7L0 | rfaf_ecoli | rl1_ecoli  |
| P37692 | RFAF_ECOLI  | *    | P37692 | P0AG44 | rfaf_ecoli | rl17_ecoli |
| P37692 | RFAF_ECOLI  | *    | P37692 | P60422 | rfaf_ecoli | rl2_ecoli  |
| P37692 | RFAF_ECOLI  | *    | P37692 | P0A7V3 | rfaf_ecoli | rs3_ecoli  |
| P37692 | RFAF_ECOLI  | *    | P37692 | P0A7V8 | rfaf_ecoli | rs4_ecoli  |
| P37692 | RFAF_ECOLI  | *    | P37692 | P02359 | rfaf_ecoli | rs7_ecoli  |
| P37692 | RFAF_ECOLI  | *    | P37692 | P39177 | rfaf_ecoli | uspg_ecoli |
|        |             |      |        |        |            |            |
| P25740 | RFAG_ECOLI  | *    | P25740 | P0A6F5 | rfag_ecoli | ch60_ecoli |
| P25740 | RFAG_ECOLI  | *    | P25740 | P0AER3 | rfag_ecoli | gltj_ecoli |
| P25740 | RFAG_ECOLI  | *    | P25740 | P60422 | rfag_ecoli | rl2_ecoli  |
| P25740 | RFAG_ECOLI  | *    | P25740 | P0A7V3 | rfag_ecoli | rs3_ecoli  |
| P25740 | RFAG_ECOLI  | *    | P25740 | P75989 | rfag_ecoli | ycge_ecoli |
| P25740 | RFAG_ECOLI  | *    | P25740 | P0AA91 | rfag_ecoli | yeay_ecoli |
|        |             |      |        |        |            |            |
| P25741 | RFAP_ECOLI  | *    | P25741 | P0A6F5 | rfap_ecoli | ch60_ecoli |
| P25741 | RFAP_ECOLI  | *    | P25741 | P63284 | rfap_ecoli | clpb_ecoli |
| P25741 | RFAP_ECOLI  | *    | P25741 | P05523 | rfap_ecoli | fpg_ecoli  |
| P25741 | RFAP_ECOLI  | *    | P25741 | P60422 | rfap_ecoli | rl2_ecoli  |
| P25741 | RFAP_ECOLI  | *    | P25741 | P00961 | rfap_ecoli | sygb_ecoli |
|        |             |      |        |        |            |            |
| P37755 | RFBK9_ECOLX | none |        |        |            |            |
|        |             |      |        |        |            |            |
| P0A8J8 | RHLB_ECOLI  | *    | P0A8J8 | P0AEB2 | rhlb_ecoli | daca_ecoli |



|        |            |   |        |        |            |             |
|--------|------------|---|--------|--------|------------|-------------|
| POA8J8 | RHLB_ECOLI | * | POA8J8 | POA6Y8 | rhlb_ecoli | dnak_ecoli  |
| POA8J8 | RHLB_ECOLI | * | POA8J8 | POCE47 | rhlb_ecoli | eftu1_ecoli |
| POA8J8 | RHLB_ECOLI | * | POA8J8 | POA6P9 | rhlb_ecoli | eno_ecoli   |
| POA8J8 | RHLB_ECOLI | * | POA8J8 | POA6P9 | rhlb_ecoli | eno_ecoli   |
| POA8J8 | RHLB_ECOLI | * | POA8J8 | P31600 | rhlb_ecoli | nfra_ecoli  |
| POA8J8 | RHLB_ECOLI | * | POA8J8 | POAFG8 | rhlb_ecoli | odp1_ecoli  |
| POA8J8 | RHLB_ECOLI | * | POA8J8 | P05055 | rhlb_ecoli | pnp_ecoli   |
| POA8J8 | RHLB_ECOLI | * | POA8J8 | P05055 | rhlb_ecoli | pnp_ecoli   |
| POA8J8 | RHLB_ECOLI | * | POA8J8 | POA7L0 | rhlb_ecoli | rl1_ecoli   |
| POA8J8 | RHLB_ECOLI | * | POA8J8 | POA7J7 | rhlb_ecoli | rl11_ecoli  |
| POA8J8 | RHLB_ECOLI | * | POA8J8 | POAA10 | rhlb_ecoli | rl13_ecoli  |
| POA8J8 | RHLB_ECOLI | * | POA8J8 | POA7K6 | rhlb_ecoli | rl19_ecoli  |
| POA8J8 | RHLB_ECOLI | * | POA8J8 | POAG48 | rhlb_ecoli | rl21_ecoli  |
| POA8J8 | RHLB_ECOLI | * | POA8J8 | P61175 | rhlb_ecoli | rl22_ecoli  |
| POA8J8 | RHLB_ECOLI | * | POA8J8 | P61175 | rhlb_ecoli | rl22_ecoli  |
| POA8J8 | RHLB_ECOLI | * | POA8J8 | POA7M2 | rhlb_ecoli | rl28_ecoli  |
| POA8J8 | RHLB_ECOLI | * | POA8J8 | P60438 | rhlb_ecoli | rl3_ecoli   |
| POA8J8 | RHLB_ECOLI | * | POA8J8 | P60438 | rhlb_ecoli | rl3_ecoli   |
| POA8J8 | RHLB_ECOLI | * | POA8J8 | POA7R1 | rhlb_ecoli | rl9_ecoli   |
| POA8J8 | RHLB_ECOLI | * | POA8J8 | P21513 | rhlb_ecoli | rne_ecoli   |
| POA8J8 | RHLB_ECOLI | * | POA8J8 | P21513 | rhlb_ecoli | rne_ecoli   |
| POA8J8 | RHLB_ECOLI | * | POA8J8 | P21513 | rhlb_ecoli | rne_ecoli   |
| POA8J8 | RHLB_ECOLI | * | POA8J8 | P21513 | rhlb_ecoli | rne_ecoli   |
| POA8J8 | RHLB_ECOLI | * | POA8J8 | P21513 | rhlb_ecoli | rne_ecoli   |
| POA8J8 | RHLB_ECOLI | * | POA8J8 | POA7R5 | rhlb_ecoli | rs10_ecoli  |
| POA8J8 | RHLB_ECOLI | * | POA8J8 | POA7T3 | rhlb_ecoli | rs16_ecoli  |
| POA8J8 | RHLB_ECOLI | * | POA8J8 | POA7U3 | rhlb_ecoli | rs19_ecoli  |
| POA8J8 | RHLB_ECOLI | * | POA8J8 | POA7U7 | rhlb_ecoli | rs20_ecoli  |
| POA8J8 | RHLB_ECOLI | * | POA8J8 | POA7V3 | rhlb_ecoli | rs3_ecoli   |
| POA8J8 | RHLB_ECOLI | * | POA8J8 | POA7V8 | rhlb_ecoli | rs4_ecoli   |
| POA8J8 | RHLB_ECOLI | * | POA8J8 | POA7W1 | rhlb_ecoli | rs5_ecoli   |
| POA8J8 | RHLB_ECOLI | * | POA8J8 | P02358 | rhlb_ecoli | rs6_ecoli   |
| POA8J8 | RHLB_ECOLI | * | POA8J8 | P02359 | rhlb_ecoli | rs7_ecoli   |
| POA8J8 | RHLB_ECOLI | * | POA8J8 | P02359 | rhlb_ecoli | rs7_ecoli   |
| P25888 | RHLE_ECOLI | * | P25888 | P27303 | rhle_ecoli | emra_ecoli  |
| P25888 | RHLE_ECOLI | * | P25888 | P18843 | rhle_ecoli | nade_ecoli  |
| P25888 | RHLE_ECOLI | * | P25888 | P38489 | rhle_ecoli | nfnb_ecoli  |
| P25888 | RHLE_ECOLI | * | P25888 | POAFI7 | rhle_ecoli | pdxh_ecoli  |
| P25888 | RHLE_ECOLI | * | P25888 | POA7L0 | rhle_ecoli | rl1_ecoli   |
| P25888 | RHLE_ECOLI | * | P25888 | P60422 | rhle_ecoli | rl2_ecoli   |
| P25888 | RHLE_ECOLI | * | P25888 | POA7M2 | rhle_ecoli | rl28_ecoli  |
| P25888 | RHLE_ECOLI | * | P25888 | P60438 | rhle_ecoli | rl3_ecoli   |
| P25888 | RHLE_ECOLI | * | P25888 | P60723 | rhle_ecoli | rl4_ecoli   |
| P25888 | RHLE_ECOLI | * | P25888 | POA8V2 | rhle_ecoli | rpob_ecoli  |

|        |            |   |        |        |            |             |
|--------|------------|---|--------|--------|------------|-------------|
| P25888 | RHLE_ECOLI | * | P25888 | P0A8T7 | rhle_ecoli | rpoc_ecoli  |
| P25888 | RHLE_ECOLI | * | P25888 | P0AG67 | rhle_ecoli | rs1_ecoli   |
| P25888 | RHLE_ECOLI | * | P25888 | P0A7R5 | rhle_ecoli | rs10_ecoli  |
| P25888 | RHLE_ECOLI | * | P25888 | P0A7T7 | rhle_ecoli | rs18_ecoli  |
| P25888 | RHLE_ECOLI | * | P25888 | P0A7V8 | rhle_ecoli | rs4_ecoli   |
| P25888 | RHLE_ECOLI | * | P25888 | P02359 | rhle_ecoli | rs7_ecoli   |
| P25888 | RHLE_ECOLI | * | P25888 | P0A7X3 | rhle_ecoli | rs9_ecoli   |
| P25888 | RHLE_ECOLI | * | P25888 | Q47157 | rhle_ecoli | yafo_ecoli  |
| P25888 | RHLE_ECOLI | * | P25888 | P0AB43 | rhle_ecoli | ycgl_ecoli  |
| P25888 | RHLE_ECOLI | * | P25888 | P08245 | rhle_ecoli | ycih_ecoli  |
| P25888 | RHLE_ECOLI | * | P25888 | P37338 | rhle_ecoli | ygae_ecoli  |
| P25888 | RHLE_ECOLI | * | P25888 | P42914 | rhle_ecoli | yrai_ecoli  |
|        |            |   |        |        |            |             |
| P0AG30 | RHO_ECOLI  | * | P0AG30 | P0CE47 | rho_ecoli  | eftu1_ecoli |
| P0AG30 | RHO_ECOLI  | * | P0AG30 | P0AES0 | rho_ecoli  | gsp_ecoli   |
| P0AG30 | RHO_ECOLI  | * | P0AG30 | P38051 | rho_ecoli  | menf_ecoli  |
| P0AG30 | RHO_ECOLI  | * | P0AG30 | P0AFG0 | rho_ecoli  | nusg_ecoli  |
| P0AG30 | RHO_ECOLI  | * | P0AG30 | P60438 | rho_ecoli  | rl3_ecoli   |
| P0AG30 | RHO_ECOLI  | * | P0AG30 | P60723 | rho_ecoli  | rl4_ecoli   |
| P0AG30 | RHO_ECOLI  | * | P0AG30 | P0A7K2 | rho_ecoli  | rl7_ecoli   |
| P0AG30 | RHO_ECOLI  | * | P0AG30 | P0A7V0 | rho_ecoli  | rs2_ecoli   |
| P0AG30 | RHO_ECOLI  | * | P0AG30 | P39177 | rho_ecoli  | uspg_ecoli  |
| P0AG30 | RHO_ECOLI  | * | P0AG30 | P0AGK4 | rho_ecoli  | yhby_ecoli  |
|        |            |   |        |        |            |             |
| P22564 | RIHC_ECOLI |   | none   |        |            |             |
|        |            |   |        |        |            |             |
| P0A948 | RIMJ_ECOLI | * | P0A948 | P0A6F5 | rimj_ecoli | ch60_ecoli  |
|        |            |   |        |        |            |             |
| P0A7X6 | RIMM_ECOLI |   | none   |        |            |             |
|        |            |   |        |        |            |             |
| P0AEI4 | RIMO_ECOLI | * | P0AEI4 | P0ABE7 | rimo_ecoli | c562_ecolx  |
| P0AEI4 | RIMO_ECOLI | * | P0AEI4 | P0AC41 | rimo_ecoli | dhsa_ecoli  |
| P0AEI4 | RIMO_ECOLI | * | P0AEI4 | P0A6Y8 | rimo_ecoli | dnak_ecoli  |
| P0AEI4 | RIMO_ECOLI | * | P0AEI4 | P0A6M4 | rimo_ecoli | dtd_ecoli   |
| P0AEI4 | RIMO_ECOLI | * | P0AEI4 | P0A9A9 | rimo_ecoli | fur_ecoli   |
| P0AEI4 | RIMO_ECOLI | * | P0AEI4 | P0A6B7 | rimo_ecoli | iscs_ecoli  |
| P0AEI4 | RIMO_ECOLI | * | P0AEI4 | P18843 | rimo_ecoli | nade_ecoli  |
| P0AEI4 | RIMO_ECOLI | * | P0AEI4 | P16916 | rimo_ecoli | rhsa_ecoli  |
| P0AEI4 | RIMO_ECOLI | * | P0AEI4 | P16918 | rimo_ecoli | rhsc_ecoli  |
| P0AEI4 | RIMO_ECOLI | * | P0AEI4 | P0AG44 | rimo_ecoli | rl17_ecoli  |
| P0AEI4 | RIMO_ECOLI | * | P0AEI4 | P0A7V3 | rimo_ecoli | rs3_ecoli   |
| P0AEI4 | RIMO_ECOLI | * | P0AEI4 | P0A7V8 | rimo_ecoli | rs4_ecoli   |
| P0AEI4 | RIMO_ECOLI | * | P0AEI4 | P0A7W1 | rimo_ecoli | rs5_ecoli   |
| P0AEI4 | RIMO_ECOLI | * | P0AEI4 | P0A905 | rimo_ecoli | slyb_ecoli  |
| P0AEI4 | RIMO_ECOLI | * | P0AEI4 | P0ACG1 | rimo_ecoli | stpa_ecoli  |

|        |            |          |        |                            |                            |
|--------|------------|----------|--------|----------------------------|----------------------------|
| POAEI4 | RIMO_ECOLI | * POAEI4 | P39177 | <a href="#">rimo_ecoli</a> | <a href="#">uspg_ecoli</a> |
| POAEI4 | RIMO_ECOLI | * POAEI4 | P24252 | <a href="#">rimo_ecoli</a> | <a href="#">ybga_ecoli</a> |
| POA8A8 | RIMP_ECOLI | * POA8A8 | P0A7W1 | <a href="#">rimp_ecoli</a> | <a href="#">rs5_ecoli</a>  |
| POA8A8 | RIMP_ECOLI | * POA8A8 | P02359 | <a href="#">rimp_ecoli</a> | <a href="#">rs7_ecoli</a>  |
| POA8A8 | RIMP_ECOLI | * POA8A8 | P0A8H6 | <a href="#">rimp_ecoli</a> | <a href="#">yihj_ecoli</a> |
| POAFU8 | RISA_ECOLI | * POAFU8 | P31119 | <a href="#">risa_ecoli</a> | <a href="#">aas_ecoli</a>  |
| POAFU8 | RISA_ECOLI | * POAFU8 | P0A6M8 | <a href="#">risa_ecoli</a> | <a href="#">efg_ecoli</a>  |
| POAFU8 | RISA_ECOLI | * POAFU8 | P76558 | <a href="#">risa_ecoli</a> | <a href="#">mao2_ecoli</a> |
| POA7L0 | RL1_ECOLI  | none     |        |                            |                            |
| POA7J3 | RL10_ECOLI | * POA7J3 | P0A6Y8 | <a href="#">rl10_ecoli</a> | <a href="#">dnak_ecoli</a> |
| POA7J3 | RL10_ECOLI | * POA7J3 | P21889 | <a href="#">rl10_ecoli</a> | <a href="#">syd_ecoli</a>  |
| POA7J7 | RL11_ECOLI | * POA7J7 | P0A6Y8 | <a href="#">rl11_ecoli</a> | <a href="#">dnak_ecoli</a> |
| POA7J7 | RL11_ECOLI | * POA7J7 | P27294 | <a href="#">rl11_ecoli</a> | <a href="#">inaa_ecoli</a> |
| POA7J7 | RL11_ECOLI | * POA7J7 | P19776 | <a href="#">rl11_ecoli</a> | <a href="#">insc_ecoli</a> |
| POA7J7 | RL11_ECOLI | * POA7J7 | P18843 | <a href="#">rl11_ecoli</a> | <a href="#">nade_ecoli</a> |
| POA7J7 | RL11_ECOLI | * POA7J7 | P69411 | <a href="#">rl11_ecoli</a> | <a href="#">rcsf_ecoli</a> |
| POA7J7 | RL11_ECOLI | * POA7J7 | P76569 | <a href="#">rl11_ecoli</a> | <a href="#">yfgd_ecoli</a> |
| POAA10 | RL13_ECOLI | * POAA10 | P0AB43 | <a href="#">rl13_ecoli</a> | <a href="#">ycgl_ecoli</a> |
| POAA10 | RL13_ECOLI | * POAA10 | P64521 | <a href="#">rl13_ecoli</a> | <a href="#">yeet_ecoli</a> |
| POADY3 | RL14_ECOLI | none     |        |                            |                            |
| P02413 | RL15_ECOLI | * P02413 | P37028 | <a href="#">rl15_ecoli</a> | <a href="#">btuf_ecoli</a> |
| P02413 | RL15_ECOLI | * P02413 | P0AB43 | <a href="#">rl15_ecoli</a> | <a href="#">ycgl_ecoli</a> |
| POADY7 | RL16_ECOLI | none     |        |                            |                            |
| POAG44 | RL17_ECOLI | * POAG44 | P37326 | <a href="#">rl17_ecoli</a> | <a href="#">ints_ecoli</a> |
| POAG44 | RL17_ECOLI | * POAG44 | P0A9K9 | <a href="#">rl17_ecoli</a> | <a href="#">slyd_ecoli</a> |
| POAG44 | RL17_ECOLI | * POAG44 | P64574 | <a href="#">rl17_ecoli</a> | <a href="#">yghw_ecoli</a> |
| POAG44 | RL17_ECOLI | * POAG44 | P39351 | <a href="#">rl17_ecoli</a> | <a href="#">yjgz_ecoli</a> |
| POC018 | RL18_ECOLI | * POC018 | P0AFJ5 | <a href="#">rl18_ecoli</a> | <a href="#">phob_ecoli</a> |
| POC018 | RL18_ECOLI | * POC018 | P60782 | <a href="#">rl18_ecoli</a> | <a href="#">psy_ecoli</a>  |
| POC018 | RL18_ECOLI | * POC018 | P0A948 | <a href="#">rl18_ecoli</a> | <a href="#">rimj_ecoli</a> |
| POA7K6 | RL19_ECOLI | * POA7K6 | P0A761 | <a href="#">rl19_ecoli</a> | <a href="#">nane_ecoli</a> |
| P60422 | RL2_ECOLI  | * P60422 | P11071 | <a href="#">rl2_ecoli</a>  | <a href="#">acek_ecoli</a> |

|        |            |   |        |        |                            |                            |
|--------|------------|---|--------|--------|----------------------------|----------------------------|
| P60422 | RL2_ECOLI  | * | P60422 | P0A6Y8 | <a href="#">rl2_ecoli</a>  | <a href="#">dnak_ecoli</a> |
| P60422 | RL2_ECOLI  | * | P60422 | P39177 | <a href="#">rl2_ecoli</a>  | <a href="#">uspg_ecoli</a> |
| P60422 | RL2_ECOLI  | * | P60422 | P0AED5 | <a href="#">rl2_ecoli</a>  | <a href="#">uvry_ecoli</a> |
| P60422 | RL2_ECOLI  | * | P60422 | P25728 | <a href="#">rl2_ecoli</a>  | <a href="#">ygba_ecoli</a> |
| P0A7L3 | RL20_ECOLI |   | none   |        |                            |                            |
| P0AG48 | RL21_ECOLI |   | none   |        |                            |                            |
| P61175 | RL22_ECOLI | * | P61175 | P32167 | <a href="#">rl22_ecoli</a> | <a href="#">yiix_ecoli</a> |
| P61175 | RL22_ECOLI | * | P61175 | P09162 | <a href="#">rl22_ecoli</a> | <a href="#">yjaa_ecoli</a> |
| P61175 | RL22_ECOLI | * | P61175 | P75977 | <a href="#">rl22_ecoli</a> | <a href="#">ymfm_ecoli</a> |
| P0ADZ0 | RL23_ECOLI | * | P0ADZ0 | P10408 | <a href="#">rl23_ecoli</a> | <a href="#">seca_ecoli</a> |
| P60624 | RL24_ECOLI | * | P60624 | P0AFJ5 | <a href="#">rl24_ecoli</a> | <a href="#">phob_ecoli</a> |
| P68919 | RL25_ECOLI | * | P68919 | P0A6Y8 | <a href="#">rl25_ecoli</a> | <a href="#">dnak_ecoli</a> |
| P0A7L8 | RL27_ECOLI | * | P0A7L8 | P22255 | <a href="#">rl27_ecoli</a> | <a href="#">cysq_ecoli</a> |
| P0A7L8 | RL27_ECOLI | * | P0A7L8 | P0A6W5 | <a href="#">rl27_ecoli</a> | <a href="#">grea_ecoli</a> |
| P0A7L8 | RL27_ECOLI | * | P0A7L8 | P18843 | <a href="#">rl27_ecoli</a> | <a href="#">nade_ecoli</a> |
| P0A7L8 | RL27_ECOLI | * | P0A7L8 | P39351 | <a href="#">rl27_ecoli</a> | <a href="#">yjgz_ecoli</a> |
| P0A7M2 | RL28_ECOLI |   | none   |        |                            |                            |
| P60438 | RL3_ECOLI  | * | P60438 | P0AE58 | <a href="#">rl3_ecoli</a>  | <a href="#">caif_ecoli</a> |
| P60438 | RL3_ECOLI  | * | P60438 | P0A6Y8 | <a href="#">rl3_ecoli</a>  | <a href="#">dnak_ecoli</a> |
| P60438 | RL3_ECOLI  | * | P60438 | P0ABU0 | <a href="#">rl3_ecoli</a>  | <a href="#">menb_ecoli</a> |
| P60438 | RL3_ECOLI  | * | P60438 | P0AG90 | <a href="#">rl3_ecoli</a>  | <a href="#">secd_ecoli</a> |
| P60438 | RL3_ECOLI  | * | P60438 | P75970 | <a href="#">rl3_ecoli</a>  | <a href="#">vxis_ecoli</a> |
| P60438 | RL3_ECOLI  | * | P60438 | P08245 | <a href="#">rl3_ecoli</a>  | <a href="#">ycih_ecoli</a> |
| P60438 | RL3_ECOLI  | * | P60438 | P76148 | <a href="#">rl3_ecoli</a>  | <a href="#">yneg_ecoli</a> |
| P0AG51 | RL30_ECOLI |   | none   |        |                            |                            |
| P0A7N4 | RL32_ECOLI |   | none   |        |                            |                            |
| P0A7N9 | RL33_ECOLI | * | P0A7N9 | P0A6Y8 | <a href="#">rl33_ecoli</a> | <a href="#">dnak_ecoli</a> |
| P0A7N9 | RL33_ECOLI | * | P0A7N9 | Q47270 | <a href="#">rl33_ecoli</a> | <a href="#">nine_ecoli</a> |
| P0A7N9 | RL33_ECOLI | * | P0A7N9 | P0AAU2 | <a href="#">rl33_ecoli</a> | <a href="#">ybfa_ecoli</a> |
| P0A7N9 | RL33_ECOLI | * | P0A7N9 | P77129 | <a href="#">rl33_ecoli</a> | <a href="#">ylbe_ecoli</a> |
| P0A7Q1 | RL35_ECOLI |   | none   |        |                            |                            |

|        |            |   |        |        |            |            |
|--------|------------|---|--------|--------|------------|------------|
| P60723 | RL4_ECOLI  | * | P60723 | P0ABH9 | rl4_ecoli  | clpa_ecoli |
| P60723 | RL4_ECOLI  | * | P60723 | P0A9P6 | rl4_ecoli  | dead_ecoli |
| P60723 | RL4_ECOLI  | * | P60723 | P0A6Y8 | rl4_ecoli  | dnak_ecoli |
| P60723 | RL4_ECOLI  | * | P60723 | P0ABT2 | rl4_ecoli  | dps_ecoli  |
| P60723 | RL4_ECOLI  | * | P60723 | P0A6M8 | rl4_ecoli  | efg_ecoli  |
| P60723 | RL4_ECOLI  | * | P60723 | POC8J8 | rl4_ecoli  | gatz_ecoli |
| P60723 | RL4_ECOLI  | * | P60723 | P09373 | rl4_ecoli  | pflb_ecoli |
| P60723 | RL4_ECOLI  | * | P60723 | P0AG30 | rl4_ecoli  | rho_ecoli  |
| P60723 | RL4_ECOLI  | * | P60723 | P21499 | rl4_ecoli  | rnr_ecoli  |
| P60723 | RL4_ECOLI  | * | P60723 | P0A8T7 | rl4_ecoli  | rpoc_ecoli |
| P60723 | RL4_ECOLI  | * | P60723 | P10408 | rl4_ecoli  | seca_ecoli |
| P60723 | RL4_ECOLI  | * | P60723 | P0A9K9 | rl4_ecoli  | slyd_ecoli |
| P60723 | RL4_ECOLI  | * | P60723 | P21507 | rl4_ecoli  | srmb_ecoli |
| P60723 | RL4_ECOLI  | * | P60723 | P30871 | rl4_ecoli  | ygif_ecoli |
| P60723 | RL4_ECOLI  | * | P60723 | P37640 | rl4_ecoli  | yhjb_ecoli |
| P62399 | RL5_ECOLI  |   | none   |        |            |            |
| P0AG55 | RL6_ECOLI  | * | P0AG55 | P76399 | rl6_ecoli  | mdtc_ecoli |
| P0AG55 | RL6_ECOLI  | * | P0AG55 | P0A7A7 | rl6_ecoli  | plsb_ecoli |
| P0A7K2 | RL7_ECOLI  |   | none   |        |            |            |
| P0A7R1 | RL9_ECOLI  | * | P0A7R1 | P0A6Y8 | rl9_ecoli  | dnak_ecoli |
| P0A7R1 | RL9_ECOLI  | * | P0A7R1 | P76104 | rl9_ecoli  | ydcp_ecoli |
| P75876 | RLMI_ECOLI |   | none   |        |            |            |
| P75864 | RLML_ECOLI | * | P75864 | P05052 | rlml_ecoli | appy_ecoli |
| P75864 | RLML_ECOLI | * | P75864 | P24183 | rlml_ecoli | fdng_ecoli |
| P75864 | RLML_ECOLI | * | P75864 | P77432 | rlml_ecoli | lsrk_ecoli |
| P75864 | RLML_ECOLI | * | P75864 | P18843 | rlml_ecoli | nade_ecoli |
| P75864 | RLML_ECOLI | * | P75864 | P0ABL5 | rlml_ecoli | napc_ecoli |
| P75864 | RLML_ECOLI | * | P75864 | P0A7L0 | rlml_ecoli | rl1_ecoli  |
| P75864 | RLML_ECOLI | * | P75864 | P0A7L0 | rlml_ecoli | rl1_ecoli  |
| P75864 | RLML_ECOLI | * | P75864 | P0AG44 | rlml_ecoli | rl17_ecoli |
| P75864 | RLML_ECOLI | * | P75864 | P60422 | rlml_ecoli | rl2_ecoli  |
| P75864 | RLML_ECOLI | * | P75864 | P60438 | rlml_ecoli | rl3_ecoli  |
| P75864 | RLML_ECOLI | * | P75864 | P0A7V3 | rlml_ecoli | rs3_ecoli  |
| P75864 | RLML_ECOLI | * | P75864 | P0A7V8 | rlml_ecoli | rs4_ecoli  |
| P75864 | RLML_ECOLI | * | P75864 | P02359 | rlml_ecoli | rs7_ecoli  |
| P75864 | RLML_ECOLI | * | P75864 | P0A7X3 | rlml_ecoli | rs9_ecoli  |
| P75864 | RLML_ECOLI | * | P75864 | P0AA43 | rlml_ecoli | rsua_ecoli |
| P75864 | RLML_ECOLI | * | P75864 | P76573 | rlml_ecoli | yfgi_ecoli |
| P75864 | RLML_ECOLI | * | P75864 | P0AGJ5 | rlml_ecoli | yfif_ecoli |

|        |            |   |        |        |            |             |
|--------|------------|---|--------|--------|------------|-------------|
| P75864 | RLML_ECOLI | * | P75864 | Q46810 | rlml_ecoli | ygfj_ecoli  |
| P75864 | RLML_ECOLI | * | P75864 | P76092 | rlml_ecoli | ynbc_ecoli  |
| P0ADR6 | RLMM_ECOLI | * | P0ADR6 | P0A6F5 | rlmm_ecoli | ch60_ecoli  |
| P0ADR6 | RLMM_ECOLI | * | P0ADR6 | P0AEM9 | rlmm_ecoli | fliy_ecoli  |
| P0ADR6 | RLMM_ECOLI | * | P0ADR6 | P0AG44 | rlmm_ecoli | rl17_ecoli  |
| P0ADR6 | RLMM_ECOLI | * | P0ADR6 | P60422 | rlmm_ecoli | rl2_ecoli   |
| P0ADR6 | RLMM_ECOLI | * | P0ADR6 | P60723 | rlmm_ecoli | rl4_ecoli   |
| P0ADR6 | RLMM_ECOLI | * | P0ADR6 | P36999 | rlmm_ecoli | rlma_ecoli  |
| P0ADR6 | RLMM_ECOLI | * | P0ADR6 | P77223 | rlmm_ecoli | rnfb_ecoli  |
| P0ADR6 | RLMM_ECOLI | * | P0ADR6 | P0A7S9 | rlmm_ecoli | rs13_ecoli  |
| P0ADR6 | RLMM_ECOLI | * | P0ADR6 | P0A7V3 | rlmm_ecoli | rs3_ecoli   |
| P0ADR6 | RLMM_ECOLI | * | P0ADR6 | P02359 | rlmm_ecoli | rs7_ecoli   |
| P0ADR6 | RLMM_ECOLI | * | P0ADR6 | P0A870 | rlmm_ecoli | talb_ecoli  |
| P0ADR6 | RLMM_ECOLI | * | P0ADR6 | Q46798 | rlmm_ecoli | yger_ecoli  |
| P0ADR6 | RLMM_ECOLI | * | P0ADR6 | P64574 | rlmm_ecoli | yghw_ecoli  |
| P36979 | RLMN_ECOLI | * | P36979 | P31119 | rlmn_ecoli | aas_ecoli   |
| P36979 | RLMN_ECOLI | * | P36979 | P0A6F5 | rlmn_ecoli | ch60_ecoli  |
| P36979 | RLMN_ECOLI | * | P36979 | P0ABH9 | rlmn_ecoli | clpa_ecoli  |
| P36979 | RLMN_ECOLI | * | P36979 | P63284 | rlmn_ecoli | clpb_ecoli  |
| P36979 | RLMN_ECOLI | * | P36979 | P0A6K1 | rlmn_ecoli | dapf_ecoli  |
| P36979 | RLMN_ECOLI | * | P36979 | P0ACF0 | rlmn_ecoli | dbha_ecoli  |
| P36979 | RLMN_ECOLI | * | P36979 | P0A9P6 | rlmn_ecoli | dead_ecoli  |
| P36979 | RLMN_ECOLI | * | P36979 | P0A9P0 | rlmn_ecoli | dldh_ecoli  |
| P36979 | RLMN_ECOLI | * | P36979 | P08622 | rlmn_ecoli | dnaj_ecoli  |
| P36979 | RLMN_ECOLI | * | P36979 | P08622 | rlmn_ecoli | dnaj_ecoli  |
| P36979 | RLMN_ECOLI | * | P36979 | P0A6M8 | rlmn_ecoli | efg_ecoli   |
| P36979 | RLMN_ECOLI | * | P36979 | P0CE47 | rlmn_ecoli | eftu1_ecoli |
| P36979 | RLMN_ECOLI | * | P36979 | P0CE47 | rlmn_ecoli | eftu1_ecoli |
| P36979 | RLMN_ECOLI | * | P36979 | P0AEH5 | rlmn_ecoli | elab_ecoli  |
| P36979 | RLMN_ECOLI | * | P36979 | P0ACP1 | rlmn_ecoli | frur_ecoli  |
| P36979 | RLMN_ECOLI | * | P36979 | P0C8J6 | rlmn_ecoli | gaty_ecoli  |
| P36979 | RLMN_ECOLI | * | P36979 | P0AES6 | rlmn_ecoli | gyrb_ecoli  |
| P36979 | RLMN_ECOLI | * | P36979 | P0ACE7 | rlmn_ecoli | hint_ecoli  |
| P36979 | RLMN_ECOLI | * | P36979 | P43329 | rlmn_ecoli | hrpa_ecoli  |
| P36979 | RLMN_ECOLI | * | P36979 | P0A705 | rlmn_ecoli | if2_ecoli   |
| P36979 | RLMN_ECOLI | * | P36979 | P0A707 | rlmn_ecoli | if3_ecoli   |
| P36979 | RLMN_ECOLI | * | P36979 | P0A9M0 | rlmn_ecoli | lon_ecoli   |
| P36979 | RLMN_ECOLI | * | P36979 | P06993 | rlmn_ecoli | malt_ecoli  |
| P36979 | RLMN_ECOLI | * | P36979 | P77188 | rlmn_ecoli | matc_ecoli  |
| P36979 | RLMN_ECOLI | * | P36979 | P02942 | rlmn_ecoli | mcp1_ecoli  |
| P36979 | RLMN_ECOLI | * | P36979 | P02921 | rlmn_ecoli | melb_ecoli  |
| P36979 | RLMN_ECOLI | * | P36979 | P0A817 | rlmn_ecoli | metk_ecoli  |
| P36979 | RLMN_ECOLI | * | P36979 | P0A9X4 | rlmn_ecoli | mreb_ecoli  |



|        |            |   |        |        |            |             |
|--------|------------|---|--------|--------|------------|-------------|
| P36979 | RLMN_ECOLI | * | P36979 | P18843 | rlmn_ecoli | nade_ecoli  |
| P36979 | RLMN_ECOLI | * | P36979 | P33599 | rlmn_ecoli | nuocd_ecoli |
| P36979 | RLMN_ECOLI | * | P36979 | P33021 | rlmn_ecoli | nupx_ecoli  |
| P36979 | RLMN_ECOLI | * | P36979 | P0AFG8 | rlmn_ecoli | odp1_ecoli  |
| P36979 | RLMN_ECOLI | * | P36979 | P06959 | rlmn_ecoli | odp2_ecoli  |
| P36979 | RLMN_ECOLI | * | P36979 | P06996 | rlmn_ecoli | ompc_ecoli  |
| P36979 | RLMN_ECOLI | * | P36979 | P02932 | rlmn_ecoli | phoe_ecoli  |
| P36979 | RLMN_ECOLI | * | P36979 | P08400 | rlmn_ecoli | phor_ecoli  |
| P36979 | RLMN_ECOLI | * | P36979 | P05055 | rlmn_ecoli | pnp_ecoli   |
| P36979 | RLMN_ECOLI | * | P36979 | P69407 | rlmn_ecoli | rccb_ecoli  |
| P36979 | RLMN_ECOLI | * | P36979 | P0A7G6 | rlmn_ecoli | reca_ecoli  |
| P36979 | RLMN_ECOLI | * | P36979 | P0A7L0 | rlmn_ecoli | rl1_ecoli   |
| P36979 | RLMN_ECOLI | * | P36979 | P0A7L0 | rlmn_ecoli | rl1_ecoli   |
| P36979 | RLMN_ECOLI | * | P36979 | P0A7L0 | rlmn_ecoli | rl1_ecoli   |
| P36979 | RLMN_ECOLI | * | P36979 | P0AA10 | rlmn_ecoli | rl13_ecoli  |
| P36979 | RLMN_ECOLI | * | P36979 | P0AA10 | rlmn_ecoli | rl13_ecoli  |
| P36979 | RLMN_ECOLI | * | P36979 | P02413 | rlmn_ecoli | rl15_ecoli  |
| P36979 | RLMN_ECOLI | * | P36979 | P02413 | rlmn_ecoli | rl15_ecoli  |
| P36979 | RLMN_ECOLI | * | P36979 | P0AG44 | rlmn_ecoli | rl17_ecoli  |
| P36979 | RLMN_ECOLI | * | P36979 | P0C018 | rlmn_ecoli | rl18_ecoli  |
| P36979 | RLMN_ECOLI | * | P36979 | P0A7K6 | rlmn_ecoli | rl19_ecoli  |
| P36979 | RLMN_ECOLI | * | P36979 | P0A7K6 | rlmn_ecoli | rl19_ecoli  |
| P36979 | RLMN_ECOLI | * | P36979 | P60422 | rlmn_ecoli | rl2_ecoli   |
| P36979 | RLMN_ECOLI | * | P36979 | P60422 | rlmn_ecoli | rl2_ecoli   |
| P36979 | RLMN_ECOLI | * | P36979 | P0A7L3 | rlmn_ecoli | rl20_ecoli  |
| P36979 | RLMN_ECOLI | * | P36979 | P0AG48 | rlmn_ecoli | rl21_ecoli  |
| P36979 | RLMN_ECOLI | * | P36979 | P61175 | rlmn_ecoli | rl22_ecoli  |
| P36979 | RLMN_ECOLI | * | P36979 | P61175 | rlmn_ecoli | rl22_ecoli  |
| P36979 | RLMN_ECOLI | * | P36979 | P0ADZ0 | rlmn_ecoli | rl23_ecoli  |
| P36979 | RLMN_ECOLI | * | P36979 | P60624 | rlmn_ecoli | rl24_ecoli  |
| P36979 | RLMN_ECOLI | * | P36979 | P60624 | rlmn_ecoli | rl24_ecoli  |
| P36979 | RLMN_ECOLI | * | P36979 | P0A7L8 | rlmn_ecoli | rl27_ecoli  |
| P36979 | RLMN_ECOLI | * | P36979 | P0A7M2 | rlmn_ecoli | rl28_ecoli  |
| P36979 | RLMN_ECOLI | * | P36979 | P0A7M6 | rlmn_ecoli | rl29_ecoli  |
| P36979 | RLMN_ECOLI | * | P36979 | P60438 | rlmn_ecoli | rl3_ecoli   |
| P36979 | RLMN_ECOLI | * | P36979 | P60438 | rlmn_ecoli | rl3_ecoli   |
| P36979 | RLMN_ECOLI | * | P36979 | P60438 | rlmn_ecoli | rl3_ecoli   |
| P36979 | RLMN_ECOLI | * | P36979 | P60723 | rlmn_ecoli | rl4_ecoli   |
| P36979 | RLMN_ECOLI | * | P36979 | P60723 | rlmn_ecoli | rl4_ecoli   |
| P36979 | RLMN_ECOLI | * | P36979 | P62399 | rlmn_ecoli | rl5_ecoli   |
| P36979 | RLMN_ECOLI | * | P36979 | P62399 | rlmn_ecoli | rl5_ecoli   |
| P36979 | RLMN_ECOLI | * | P36979 | P0AG55 | rlmn_ecoli | rl6_ecoli   |
| P36979 | RLMN_ECOLI | * | P36979 | P0A7K2 | rlmn_ecoli | rl7_ecoli   |
| P36979 | RLMN_ECOLI | * | P36979 | P0A7R1 | rlmn_ecoli | rl9_ecoli   |

|        |            |   |        |        |            |            |
|--------|------------|---|--------|--------|------------|------------|
| P36979 | RLMN_ECOLI | * | P36979 | P0A7R1 | rlmn_ecoli | rl9_ecoli  |
| P36979 | RLMN_ECOLI | * | P36979 | P75864 | rlmn_ecoli | rlml_ecoli |
| P36979 | RLMN_ECOLI | * | P36979 | P37765 | rlmn_ecoli | rlub_ecoli |
| P36979 | RLMN_ECOLI | * | P36979 | P37765 | rlmn_ecoli | rlub_ecoli |
| P36979 | RLMN_ECOLI | * | P36979 | P21513 | rlmn_ecoli | rne_ecoli  |
| P36979 | RLMN_ECOLI | * | P36979 | P21499 | rlmn_ecoli | rnr_ecoli  |
| P36979 | RLMN_ECOLI | * | P36979 | P21499 | rlmn_ecoli | rnr_ecoli  |
| P36979 | RLMN_ECOLI | * | P36979 | P0A8T7 | rlmn_ecoli | rpoc_ecoli |
| P36979 | RLMN_ECOLI | * | P36979 | P0AG67 | rlmn_ecoli | rs1_ecoli  |
| P36979 | RLMN_ECOLI | * | P36979 | P0AG67 | rlmn_ecoli | rs1_ecoli  |
| P36979 | RLMN_ECOLI | * | P36979 | P0A7R5 | rlmn_ecoli | rs10_ecoli |
| P36979 | RLMN_ECOLI | * | P36979 | P0A7R5 | rlmn_ecoli | rs10_ecoli |
| P36979 | RLMN_ECOLI | * | P36979 | P0AG59 | rlmn_ecoli | rs14_ecoli |
| P36979 | RLMN_ECOLI | * | P36979 | P0A7T3 | rlmn_ecoli | rs16_ecoli |
| P36979 | RLMN_ECOLI | * | P36979 | P0A7T7 | rlmn_ecoli | rs18_ecoli |
| P36979 | RLMN_ECOLI | * | P36979 | P0A7V0 | rlmn_ecoli | rs2_ecoli  |
| P36979 | RLMN_ECOLI | * | P36979 | P0A7V0 | rlmn_ecoli | rs2_ecoli  |
| P36979 | RLMN_ECOLI | * | P36979 | P0A7V3 | rlmn_ecoli | rs3_ecoli  |
| P36979 | RLMN_ECOLI | * | P36979 | P0A7V3 | rlmn_ecoli | rs3_ecoli  |
| P36979 | RLMN_ECOLI | * | P36979 | P0A7V8 | rlmn_ecoli | rs4_ecoli  |
| P36979 | RLMN_ECOLI | * | P36979 | P0A7V8 | rlmn_ecoli | rs4_ecoli  |
| P36979 | RLMN_ECOLI | * | P36979 | P0A7W1 | rlmn_ecoli | rs5_ecoli  |
| P36979 | RLMN_ECOLI | * | P36979 | P0A7W1 | rlmn_ecoli | rs5_ecoli  |
| P36979 | RLMN_ECOLI | * | P36979 | P02358 | rlmn_ecoli | rs6_ecoli  |
| P36979 | RLMN_ECOLI | * | P36979 | P02359 | rlmn_ecoli | rs7_ecoli  |
| P36979 | RLMN_ECOLI | * | P36979 | P02359 | rlmn_ecoli | rs7_ecoli  |
| P36979 | RLMN_ECOLI | * | P36979 | P10408 | rlmn_ecoli | seca_ecoli |
| P36979 | RLMN_ECOLI | * | P36979 | P10408 | rlmn_ecoli | seca_ecoli |
| P36979 | RLMN_ECOLI | * | P36979 | P14081 | rlmn_ecoli | selb_ecoli |
| P36979 | RLMN_ECOLI | * | P36979 | P14081 | rlmn_ecoli | selb_ecoli |
| P36979 | RLMN_ECOLI | * | P36979 | P0AEU7 | rlmn_ecoli | skp_ecoli  |
| P36979 | RLMN_ECOLI | * | P36979 | P0AG24 | rlmn_ecoli | spot_ecoli |
| P36979 | RLMN_ECOLI | * | P36979 | P21507 | rlmn_ecoli | srmb_ecoli |
| P36979 | RLMN_ECOLI | * | P36979 | P21507 | rlmn_ecoli | srmb_ecoli |
| P36979 | RLMN_ECOLI | * | P36979 | P0A8N3 | rlmn_ecoli | syk1_ecoli |
| P36979 | RLMN_ECOLI | * | P36979 | P0A8N5 | rlmn_ecoli | syk2_ecoli |
| P36979 | RLMN_ECOLI | * | P36979 | P71238 | rlmn_ecoli | wcad_ecoli |
| P36979 | RLMN_ECOLI | * | P36979 | P77199 | rlmn_ecoli | yait_ecoli |
| P36979 | RLMN_ECOLI | * | P36979 | P08245 | rlmn_ecoli | ycih_ecoli |
| P36979 | RLMN_ECOLI | * | P36979 | P76104 | rlmn_ecoli | ydcg_ecoli |
| P36979 | RLMN_ECOLI | * | P36979 | P0A8M6 | rlmn_ecoli | yeex_ecoli |
| P36979 | RLMN_ECOLI | * | P36979 | P0AGJ5 | rlmn_ecoli | yfif_ecoli |
| P36979 | RLMN_ECOLI | * | P36979 | P0AGJ5 | rlmn_ecoli | yfif_ecoli |
| P36979 | RLMN_ECOLI | * | P36979 | P0ADQ7 | rlmn_ecoli | ygam_ecoli |
| P36979 | RLMN_ECOLI | * | P36979 | P30871 | rlmn_ecoli | ygif_ecoli |

|        |            |      |        |        |            |            |
|--------|------------|------|--------|--------|------------|------------|
| P36979 | RLMN_ECOLI | *    | P36979 | P0AGK4 | rlmn_ecoli | yhby_ecoli |
| P36979 | RLMN_ECOLI | *    | P36979 | P37634 | rlmn_ecoli | yhir_ecoli |
| P36979 | RLMN_ECOLI | *    | P36979 | P37634 | rlmn_ecoli | yhir_ecoli |
| P36979 | RLMN_ECOLI | *    | P36979 | P0ADK8 | rlmn_ecoli | yibl_ecoli |
| P10100 | RLPA_ECOLI | none |        |        |            |            |
| P37765 | RLUB_ECOLI | *    | P37765 | P33224 | rlub_ecoli | aidb_ecoli |
| P37765 | RLUB_ECOLI | *    | P37765 | P0ACF0 | rlub_ecoli | dbha_ecoli |
| P37765 | RLUB_ECOLI | *    | P37765 | P43329 | rlub_ecoli | hrpa_ecoli |
| P37765 | RLUB_ECOLI | *    | P37765 | P43329 | rlub_ecoli | hrpa_ecoli |
| P37765 | RLUB_ECOLI | *    | P37765 | P77188 | rlub_ecoli | matc_ecoli |
| P37765 | RLUB_ECOLI | *    | P37765 | P0AFG8 | rlub_ecoli | odp1_ecoli |
| P37765 | RLUB_ECOLI | *    | P37765 | P05055 | rlub_ecoli | pnp_ecoli  |
| P37765 | RLUB_ECOLI | *    | P37765 | P23830 | rlub_ecoli | pss_ecoli  |
| P37765 | RLUB_ECOLI | *    | P37765 | P0A7L0 | rlub_ecoli | rl1_ecoli  |
| P37765 | RLUB_ECOLI | *    | P37765 | P0A7L0 | rlub_ecoli | rl1_ecoli  |
| P37765 | RLUB_ECOLI | *    | P37765 | P0AA10 | rlub_ecoli | rl13_ecoli |
| P37765 | RLUB_ECOLI | *    | P37765 | P0AA10 | rlub_ecoli | rl13_ecoli |
| P37765 | RLUB_ECOLI | *    | P37765 | P0A7K6 | rlub_ecoli | rl19_ecoli |
| P37765 | RLUB_ECOLI | *    | P37765 | P60422 | rlub_ecoli | rl2_ecoli  |
| P37765 | RLUB_ECOLI | *    | P37765 | P0AG48 | rlub_ecoli | rl21_ecoli |
| P37765 | RLUB_ECOLI | *    | P37765 | P61175 | rlub_ecoli | rl22_ecoli |
| P37765 | RLUB_ECOLI | *    | P37765 | P60624 | rlub_ecoli | rl24_ecoli |
| P37765 | RLUB_ECOLI | *    | P37765 | P68919 | rlub_ecoli | rl25_ecoli |
| P37765 | RLUB_ECOLI | *    | P37765 | P0A7M2 | rlub_ecoli | rl28_ecoli |
| P37765 | RLUB_ECOLI | *    | P37765 | P60438 | rlub_ecoli | rl3_ecoli  |
| P37765 | RLUB_ECOLI | *    | P37765 | P60438 | rlub_ecoli | rl3_ecoli  |
| P37765 | RLUB_ECOLI | *    | P37765 | P60723 | rlub_ecoli | rl4_ecoli  |
| P37765 | RLUB_ECOLI | *    | P37765 | P60723 | rlub_ecoli | rl4_ecoli  |
| P37765 | RLUB_ECOLI | *    | P37765 | P62399 | rlub_ecoli | rl5_ecoli  |
| P37765 | RLUB_ECOLI | *    | P37765 | P0AG55 | rlub_ecoli | rl6_ecoli  |
| P37765 | RLUB_ECOLI | *    | P37765 | P0A7R1 | rlub_ecoli | rl9_ecoli  |
| P37765 | RLUB_ECOLI | *    | P37765 | P0A7R1 | rlub_ecoli | rl9_ecoli  |
| P37765 | RLUB_ECOLI | *    | P37765 | P75864 | rlub_ecoli | rlml_ecoli |
| P37765 | RLUB_ECOLI | *    | P37765 | P75966 | rlub_ecoli | rlue_ecoli |
| P37765 | RLUB_ECOLI | *    | P37765 | P21499 | rlub_ecoli | rnr_ecoli  |
| P37765 | RLUB_ECOLI | *    | P37765 | P21499 | rlub_ecoli | rnr_ecoli  |
| P37765 | RLUB_ECOLI | *    | P37765 | P0AG67 | rlub_ecoli | rs1_ecoli  |
| P37765 | RLUB_ECOLI | *    | P37765 | P0AG67 | rlub_ecoli | rs1_ecoli  |
| P37765 | RLUB_ECOLI | *    | P37765 | P0A7R5 | rlub_ecoli | rs10_ecoli |
| P37765 | RLUB_ECOLI | *    | P37765 | P0A7R5 | rlub_ecoli | rs10_ecoli |
| P37765 | RLUB_ECOLI | *    | P37765 | P0A7S9 | rlub_ecoli | rs13_ecoli |
| P37765 | RLUB_ECOLI | *    | P37765 | P0AG59 | rlub_ecoli | rs14_ecoli |
| P37765 | RLUB_ECOLI | *    | P37765 | P0A7T3 | rlub_ecoli | rs16_ecoli |

|        |            |   |        |        |            |            |
|--------|------------|---|--------|--------|------------|------------|
| P37765 | RLUB_ECOLI | * | P37765 | P0A7T7 | rlub_ecoli | rs18_ecoli |
| P37765 | RLUB_ECOLI | * | P37765 | P0A7V0 | rlub_ecoli | rs2_ecoli  |
| P37765 | RLUB_ECOLI | * | P37765 | P0A7U7 | rlub_ecoli | rs20_ecoli |
| P37765 | RLUB_ECOLI | * | P37765 | P68679 | rlub_ecoli | rs21_ecoli |
| P37765 | RLUB_ECOLI | * | P37765 | P0A7V3 | rlub_ecoli | rs3_ecoli  |
| P37765 | RLUB_ECOLI | * | P37765 | P0A7V8 | rlub_ecoli | rs4_ecoli  |
| P37765 | RLUB_ECOLI | * | P37765 | P0A7W1 | rlub_ecoli | rs5_ecoli  |
| P37765 | RLUB_ECOLI | * | P37765 | P0A7W1 | rlub_ecoli | rs5_ecoli  |
| P37765 | RLUB_ECOLI | * | P37765 | P02358 | rlub_ecoli | rs6_ecoli  |
| P37765 | RLUB_ECOLI | * | P37765 | P02359 | rlub_ecoli | rs7_ecoli  |
| P37765 | RLUB_ECOLI | * | P37765 | P02359 | rlub_ecoli | rs7_ecoli  |
| P37765 | RLUB_ECOLI | * | P37765 | P21507 | rlub_ecoli | srmb_ecoli |
| P37765 | RLUB_ECOLI | * | P37765 | P21507 | rlub_ecoli | srmb_ecoli |
| P37765 | RLUB_ECOLI | * | P37765 | P00957 | rlub_ecoli | sya_ecoli  |
| P37765 | RLUB_ECOLI | * | P37765 | P77766 | rlub_ecoli | trph_ecoli |
| P37765 | RLUB_ECOLI | * | P37765 | P0A9U1 | rlub_ecoli | ybhf_ecoli |
| P37765 | RLUB_ECOLI | * | P37765 | P31808 | rlub_ecoli | ycik_ecoli |
| P37765 | RLUB_ECOLI | * | P37765 | P0AGJ5 | rlub_ecoli | yfif_ecoli |
| P37765 | RLUB_ECOLI | * | P37765 | P30871 | rlub_ecoli | ygif_ecoli |
| P37765 | RLUB_ECOLI | * | P37765 | P30871 | rlub_ecoli | ygif_ecoli |
| P37765 | RLUB_ECOLI | * | P37765 | P67762 | rlub_ecoli | yhbp_ecoli |
| P37765 | RLUB_ECOLI | * | P37765 | P0AGK4 | rlub_ecoli | yhby_ecoli |
| P37765 | RLUB_ECOLI | * | P37765 | P28722 | rlub_ecoli | yhca_ecoli |
| P37765 | RLUB_ECOLI | * | P37765 | P37631 | rlub_ecoli | yhin_ecoli |
| P37765 | RLUB_ECOLI | * | P37765 | P37634 | rlub_ecoli | yhir_ecoli |
| P37765 | RLUB_ECOLI | * | P37765 | P37634 | rlub_ecoli | yhir_ecoli |
| P37765 | RLUB_ECOLI | * | P37765 | P0ADK8 | rlub_ecoli | yibl_ecoli |
| P0AA39 | RLUC_ECOLI | * | P0AA39 | P0ABD5 | rluc_ecoli | acca_ecoli |
| P0AA39 | RLUC_ECOLI | * | P0AA39 | P33224 | rluc_ecoli | aidb_ecoli |
| P0AA39 | RLUC_ECOLI | * | P0AA39 | P0ACF0 | rluc_ecoli | dbha_ecoli |
| P0AA39 | RLUC_ECOLI | * | P0AA39 | P0ACF4 | rluc_ecoli | dbhb_ecoli |
| P0AA39 | RLUC_ECOLI | * | P0AA39 | P0A9P6 | rluc_ecoli | dead_ecoli |
| P0AA39 | RLUC_ECOLI | * | P0AA39 | P0A9P0 | rluc_ecoli | dldh_ecoli |
| P0AA39 | RLUC_ECOLI | * | P0AA39 | P0A9P0 | rluc_ecoli | dldh_ecoli |
| P0AA39 | RLUC_ECOLI | * | P0AA39 | P43329 | rluc_ecoli | hrpa_ecoli |
| P0AA39 | RLUC_ECOLI | * | P0AA39 | P0AFG8 | rluc_ecoli | odp1_ecoli |
| P0AA39 | RLUC_ECOLI | * | P0AA39 | P06959 | rluc_ecoli | odp2_ecoli |
| P0AA39 | RLUC_ECOLI | * | P0AA39 | P23830 | rluc_ecoli | pss_ecoli  |
| P0AA39 | RLUC_ECOLI | * | P0AA39 | P23830 | rluc_ecoli | pss_ecoli  |
| P0AA39 | RLUC_ECOLI | * | P0AA39 | P37177 | rluc_ecoli | pt1p_ecoli |
| P0AA39 | RLUC_ECOLI | * | P0AA39 | P25888 | rluc_ecoli | rhle_ecoli |
| P0AA39 | RLUC_ECOLI | * | P0AA39 | P0A7L0 | rluc_ecoli | rl1_ecoli  |
| P0AA39 | RLUC_ECOLI | * | P0AA39 | P0A7L0 | rluc_ecoli | rl1_ecoli  |
| P0AA39 | RLUC_ECOLI | * | P0AA39 | P0A7L0 | rluc_ecoli | rl1_ecoli  |

|        |            |   |        |        |            |            |
|--------|------------|---|--------|--------|------------|------------|
| P0AA39 | RLUC_ECOLI | * | P0AA39 | P0AA10 | rluc_ecoli | rl13_ecoli |
| P0AA39 | RLUC_ECOLI | * | P0AA39 | P0AA10 | rluc_ecoli | rl13_ecoli |
| P0AA39 | RLUC_ECOLI | * | P0AA39 | P0ADY3 | rluc_ecoli | rl14_ecoli |
| P0AA39 | RLUC_ECOLI | * | P0AA39 | P02413 | rluc_ecoli | rl15_ecoli |
| P0AA39 | RLUC_ECOLI | * | P0AA39 | P02413 | rluc_ecoli | rl15_ecoli |
| P0AA39 | RLUC_ECOLI | * | P0AA39 | P0ADY7 | rluc_ecoli | rl16_ecoli |
| P0AA39 | RLUC_ECOLI | * | P0AA39 | P0AG44 | rluc_ecoli | rl17_ecoli |
| P0AA39 | RLUC_ECOLI | * | P0AA39 | P0AG44 | rluc_ecoli | rl17_ecoli |
| P0AA39 | RLUC_ECOLI | * | P0AA39 | P0C018 | rluc_ecoli | rl18_ecoli |
| P0AA39 | RLUC_ECOLI | * | P0AA39 | P0A7K6 | rluc_ecoli | rl19_ecoli |
| P0AA39 | RLUC_ECOLI | * | P0AA39 | P0A7K6 | rluc_ecoli | rl19_ecoli |
| P0AA39 | RLUC_ECOLI | * | P0AA39 | P60422 | rluc_ecoli | rl2_ecoli  |
| P0AA39 | RLUC_ECOLI | * | P0AA39 | P60422 | rluc_ecoli | rl2_ecoli  |
| P0AA39 | RLUC_ECOLI | * | P0AA39 | P60422 | rluc_ecoli | rl2_ecoli  |
| P0AA39 | RLUC_ECOLI | * | P0AA39 | P0A7L3 | rluc_ecoli | rl20_ecoli |
| P0AA39 | RLUC_ECOLI | * | P0AA39 | P0AG48 | rluc_ecoli | rl21_ecoli |
| P0AA39 | RLUC_ECOLI | * | P0AA39 | P0AG48 | rluc_ecoli | rl21_ecoli |
| P0AA39 | RLUC_ECOLI | * | P0AA39 | P61175 | rluc_ecoli | rl22_ecoli |
| P0AA39 | RLUC_ECOLI | * | P0AA39 | P61175 | rluc_ecoli | rl22_ecoli |
| P0AA39 | RLUC_ECOLI | * | P0AA39 | P60624 | rluc_ecoli | rl24_ecoli |
| P0AA39 | RLUC_ECOLI | * | P0AA39 | P60624 | rluc_ecoli | rl24_ecoli |
| P0AA39 | RLUC_ECOLI | * | P0AA39 | P0A7M2 | rluc_ecoli | rl28_ecoli |
| P0AA39 | RLUC_ECOLI | * | P0AA39 | P60438 | rluc_ecoli | rl3_ecoli  |
| P0AA39 | RLUC_ECOLI | * | P0AA39 | P60438 | rluc_ecoli | rl3_ecoli  |
| P0AA39 | RLUC_ECOLI | * | P0AA39 | P60723 | rluc_ecoli | rl4_ecoli  |
| P0AA39 | RLUC_ECOLI | * | P0AA39 | P60723 | rluc_ecoli | rl4_ecoli  |
| P0AA39 | RLUC_ECOLI | * | P0AA39 | P62399 | rluc_ecoli | rl5_ecoli  |
| P0AA39 | RLUC_ECOLI | * | P0AA39 | P0AG55 | rluc_ecoli | rl6_ecoli  |
| P0AA39 | RLUC_ECOLI | * | P0AA39 | P0AG55 | rluc_ecoli | rl6_ecoli  |
| P0AA39 | RLUC_ECOLI | * | P0AA39 | P0A7K2 | rluc_ecoli | rl7_ecoli  |
| P0AA39 | RLUC_ECOLI | * | P0AA39 | P0A7R1 | rluc_ecoli | rl9_ecoli  |
| P0AA39 | RLUC_ECOLI | * | P0AA39 | P0A7R1 | rluc_ecoli | rl9_ecoli  |
| P0AA39 | RLUC_ECOLI | * | P0AA39 | P75864 | rluc_ecoli | rlml_ecoli |
| P0AA39 | RLUC_ECOLI | * | P0AA39 | P75864 | rluc_ecoli | rlml_ecoli |
| P0AA39 | RLUC_ECOLI | * | P0AA39 | P37765 | rluc_ecoli | rlub_ecoli |
| P0AA39 | RLUC_ECOLI | * | P0AA39 | P37765 | rluc_ecoli | rlub_ecoli |
| P0AA39 | RLUC_ECOLI | * | P0AA39 | P75966 | rluc_ecoli | rlue_ecoli |
| P0AA39 | RLUC_ECOLI | * | P0AA39 | P21499 | rluc_ecoli | rnr_ecoli  |
| P0AA39 | RLUC_ECOLI | * | P0AA39 | P21499 | rluc_ecoli | rnr_ecoli  |
| P0AA39 | RLUC_ECOLI | * | P0AA39 | P0A8V2 | rluc_ecoli | rpob_ecoli |
| P0AA39 | RLUC_ECOLI | * | P0AA39 | P0A8V2 | rluc_ecoli | rpob_ecoli |
| P0AA39 | RLUC_ECOLI | * | P0AA39 | P0A8T7 | rluc_ecoli | rpoc_ecoli |
| P0AA39 | RLUC_ECOLI | * | P0AA39 | P0A8T7 | rluc_ecoli | rpoc_ecoli |
| P0AA39 | RLUC_ECOLI | * | P0AA39 | P0AG67 | rluc_ecoli | rs1_ecoli  |
| P0AA39 | RLUC_ECOLI | * | P0AA39 | P0A7S9 | rluc_ecoli | rs13_ecoli |

|        |             |      |        |        |             |             |
|--------|-------------|------|--------|--------|-------------|-------------|
| P0AA39 | RLUC_ECOLI  | *    | P0AA39 | P0A7S9 | rluc_ecoli  | rs13_ecoli  |
| P0AA39 | RLUC_ECOLI  | *    | P0AA39 | P0A7S9 | rluc_ecoli  | rs13_ecoli  |
| P0AA39 | RLUC_ECOLI  | *    | P0AA39 | P0AG59 | rluc_ecoli  | rs14_ecoli  |
| P0AA39 | RLUC_ECOLI  | *    | P0AA39 | P0A7T3 | rluc_ecoli  | rs16_ecoli  |
| P0AA39 | RLUC_ECOLI  | *    | P0AA39 | P0A7T7 | rluc_ecoli  | rs18_ecoli  |
| P0AA39 | RLUC_ECOLI  | *    | P0AA39 | P0A7V0 | rluc_ecoli  | rs2_ecoli   |
| P0AA39 | RLUC_ECOLI  | *    | P0AA39 | P0A7V0 | rluc_ecoli  | rs2_ecoli   |
| P0AA39 | RLUC_ECOLI  | *    | P0AA39 | P0A7U7 | rluc_ecoli  | rs20_ecoli  |
| P0AA39 | RLUC_ECOLI  | *    | P0AA39 | P0A7V3 | rluc_ecoli  | rs3_ecoli   |
| P0AA39 | RLUC_ECOLI  | *    | P0AA39 | P0A7V3 | rluc_ecoli  | rs3_ecoli   |
| P0AA39 | RLUC_ECOLI  | *    | P0AA39 | P0A7V8 | rluc_ecoli  | rs4_ecoli   |
| P0AA39 | RLUC_ECOLI  | *    | P0AA39 | P0A7W1 | rluc_ecoli  | rs5_ecoli   |
| P0AA39 | RLUC_ECOLI  | *    | P0AA39 | P0A7W1 | rluc_ecoli  | rs5_ecoli   |
| P0AA39 | RLUC_ECOLI  | *    | P0AA39 | P02358 | rluc_ecoli  | rs6_ecoli   |
| P0AA39 | RLUC_ECOLI  | *    | P0AA39 | P02359 | rluc_ecoli  | rs7_ecoli   |
| P0AA39 | RLUC_ECOLI  | *    | P0AA39 | P02359 | rluc_ecoli  | rs7_ecoli   |
| P0AA39 | RLUC_ECOLI  | *    | P0AA39 | P02359 | rluc_ecoli  | rs7_ecoli   |
| P0AA39 | RLUC_ECOLI  | *    | P0AA39 | P10408 | rluc_ecoli  | seca_ecoli  |
| P0AA39 | RLUC_ECOLI  | *    | P0AA39 | P0AG24 | rluc_ecoli  | spot_ecoli  |
| P0AA39 | RLUC_ECOLI  | *    | P0AA39 | P21507 | rluc_ecoli  | srm_b_ecoli |
| P0AA39 | RLUC_ECOLI  | *    | P0AA39 | P39177 | rluc_ecoli  | uspg_ecoli  |
| P0AA39 | RLUC_ECOLI  | *    | P0AA39 | P0AAS7 | rluc_ecoli  | ybcj_ecoli  |
| P0AA39 | RLUC_ECOLI  | *    | P0AA39 | P75828 | rluc_ecoli  | ybjd_ecoli  |
| P0AA39 | RLUC_ECOLI  | *    | P0AA39 | P31063 | rluc_ecoli  | yedd_ecoli  |
| P0AA39 | RLUC_ECOLI  | *    | P0AA39 | P0AGJ5 | rluc_ecoli  | yfif_ecoli  |
| P0AA39 | RLUC_ECOLI  | *    | P0AA39 | P0AGJ5 | rluc_ecoli  | yfif_ecoli  |
| P0AA39 | RLUC_ECOLI  | *    | P0AA39 | P30871 | rluc_ecoli  | ygif_ecoli  |
| P0AA39 | RLUC_ECOLI  | *    | P0AA39 | P37634 | rluc_ecoli  | yhir_ecoli  |
| P0AA39 | RLUC_ECOLI  | *    | P0AA39 | P0ADK8 | rluc_ecoli  | yibl_ecoli  |
| P0AA39 | RLUC_ECOLI  | *    | P0AA39 | P76116 | rluc_ecoli  | ynce_ecoli  |
| P0AA39 | RLUC_ECOLI  | *    | P0AA39 | P76116 | rluc_ecoli  | ynce_ecoli  |
| P0AFW2 | RMF_ECOLI   | none |        |        |             |             |
| P37744 | RMLA1_ECOLI | *    | P37744 | P0A6K3 | rmla1_ecoli | def_ecoli   |
| P37744 | RMLA1_ECOLI | *    | P37744 | Q47129 | rmla1_ecoli | fear_ecoli  |
| P37744 | RMLA1_ECOLI | *    | P37744 | P37595 | rmla1_ecoli | iaaa_ecoli  |
| P37744 | RMLA1_ECOLI | *    | P37744 | P18843 | rmla1_ecoli | nade_ecoli  |
| P37744 | RMLA1_ECOLI | *    | P37744 | P28722 | rmla1_ecoli | yhca_ecoli  |
| P55253 | RMLA3_ECOLX | none |        |        |             |             |
| P37759 | RMLB1_ECOLI | *    | P37759 | P00722 | rmlb1_ecoli | bgal_ecoli  |
| P37759 | RMLB1_ECOLI | *    | P37759 | P18843 | rmlb1_ecoli | nade_ecoli  |
| P37759 | RMLB1_ECOLI | *    | P37759 | P10908 | rmlb1_ecoli | ugpq_ecoli  |



|        |             |          |        |            |             |
|--------|-------------|----------|--------|------------|-------------|
| P27830 | RMLB2_ECOLI | none     |        |            |             |
| P37745 | RMLC_ECOLI  | * P37745 | P0A6F5 | rmlc_ecoli | ch60_ecoli  |
| P37745 | RMLC_ECOLI  | * P37745 | P0A6F5 | rmlc_ecoli | ch60_ecoli  |
| P37745 | RMLC_ECOLI  | * P37745 | P64599 | rmlc_ecoli | yhbt_ecoli  |
| P37745 | RMLC_ECOLI  | * P37745 | P37197 | rmlc_ecoli | yhja_ecoli  |
| P30850 | RNB_ECOLI   | * P30850 | P27550 | rnb_ecoli  | acsa_ecoli  |
| P30850 | RNB_ECOLI   | * P30850 | P0A6M8 | rnb_ecoli  | efg_ecoli   |
| P30850 | RNB_ECOLI   | * P30850 | P0A6Z3 | rnb_ecoli  | htpg_ecoli  |
| P30850 | RNB_ECOLI   | * P30850 | P18843 | rnb_ecoli  | nade_ecoli  |
| P30850 | RNB_ECOLI   | * P30850 | P0A7W1 | rnb_ecoli  | rs5_ecoli   |
| P30850 | RNB_ECOLI   | * P30850 | P00956 | rnb_ecoli  | syi_ecoli   |
| P30850 | RNB_ECOLI   | * P30850 | P30136 | rnb_ecoli  | thic_ecoli  |
| P09155 | RND_ECOLI   | * P09155 | P0A6F5 | rnd_ecoli  | ch60_ecoli  |
| P21513 | RNE_ECOLI   | * P21513 | P0A9P6 | rne_ecoli  | dead_ecoli  |
| P21513 | RNE_ECOLI   | * P21513 | P0A9P6 | rne_ecoli  | dead_ecoli  |
| P21513 | RNE_ECOLI   | * P21513 | P0A6Y8 | rne_ecoli  | dnak_ecoli  |
| P21513 | RNE_ECOLI   | * P21513 | P0A6Y8 | rne_ecoli  | dnak_ecoli  |
| P21513 | RNE_ECOLI   | * P21513 | P0A6Y8 | rne_ecoli  | dnak_ecoli  |
| P21513 | RNE_ECOLI   | * P21513 | P0A6Y8 | rne_ecoli  | dnak_ecoli  |
| P21513 | RNE_ECOLI   | * P21513 | P0A6Y8 | rne_ecoli  | dnak_ecoli  |
| P21513 | RNE_ECOLI   | * P21513 | P0A6Y8 | rne_ecoli  | dnak_ecoli  |
| P21513 | RNE_ECOLI   | * P21513 | P0A6Y8 | rne_ecoli  | dnak_ecoli  |
| P21513 | RNE_ECOLI   | * P21513 | P0A6Y8 | rne_ecoli  | dnak_ecoli  |
| P21513 | RNE_ECOLI   | * P21513 | P37313 | rne_ecoli  | dppf_ecoli  |
| P21513 | RNE_ECOLI   | * P21513 | P0CE47 | rne_ecoli  | eftu1_ecoli |
| P21513 | RNE_ECOLI   | * P21513 | P0A6P9 | rne_ecoli  | eno_ecoli   |
| P21513 | RNE_ECOLI   | * P21513 | P0A6P9 | rne_ecoli  | eno_ecoli   |
| P21513 | RNE_ECOLI   | * P21513 | P0A6P9 | rne_ecoli  | eno_ecoli   |
| P21513 | RNE_ECOLI   | * P21513 | P0A6P9 | rne_ecoli  | eno_ecoli   |
| P21513 | RNE_ECOLI   | * P21513 | P0A6P9 | rne_ecoli  | eno_ecoli   |
| P21513 | RNE_ECOLI   | * P21513 | P0A6P9 | rne_ecoli  | eno_ecoli   |
| P21513 | RNE_ECOLI   | * P21513 | P0A6P9 | rne_ecoli  | eno_ecoli   |
| P21513 | RNE_ECOLI   | * P21513 | P0A6P9 | rne_ecoli  | eno_ecoli   |
| P21513 | RNE_ECOLI   | * P21513 | P0A6P9 | rne_ecoli  | eno_ecoli   |
| P21513 | RNE_ECOLI   | * P21513 | P0A6P9 | rne_ecoli  | eno_ecoli   |
| P21513 | RNE_ECOLI   | * P21513 | P0A6Q6 | rne_ecoli  | fabz_ecoli  |
| P21513 | RNE_ECOLI   | * P21513 | P0ACP1 | rne_ecoli  | frur_ecoli  |
| P21513 | RNE_ECOLI   | * P21513 | P0A6X3 | rne_ecoli  | hfq_ecoli   |
| P21513 | RNE_ECOLI   | * P21513 | P31069 | rne_ecoli  | kch_ecoli   |
| P21513 | RNE_ECOLI   | * P21513 | P31069 | rne_ecoli  | kch_ecoli   |



|        |           |   |        |        |           |            |
|--------|-----------|---|--------|--------|-----------|------------|
| P21513 | RNE_ECOLI | * | P21513 | P60422 | rne_ecoli | rl2_ecoli  |
| P21513 | RNE_ECOLI | * | P21513 | P0AG48 | rne_ecoli | rl21_ecoli |
| P21513 | RNE_ECOLI | * | P21513 | P61175 | rne_ecoli | rl22_ecoli |
| P21513 | RNE_ECOLI | * | P21513 | P61175 | rne_ecoli | rl22_ecoli |
| P21513 | RNE_ECOLI | * | P21513 | P0ADZ0 | rne_ecoli | rl23_ecoli |
| P21513 | RNE_ECOLI | * | P21513 | P60624 | rne_ecoli | rl24_ecoli |
| P21513 | RNE_ECOLI | * | P21513 | P0A7M2 | rne_ecoli | rl28_ecoli |
| P21513 | RNE_ECOLI | * | P21513 | P0A7M2 | rne_ecoli | rl28_ecoli |
| P21513 | RNE_ECOLI | * | P21513 | P60438 | rne_ecoli | rl3_ecoli  |
| P21513 | RNE_ECOLI | * | P21513 | P60438 | rne_ecoli | rl3_ecoli  |
| P21513 | RNE_ECOLI | * | P21513 | P60723 | rne_ecoli | rl4_ecoli  |
| P21513 | RNE_ECOLI | * | P21513 | P60723 | rne_ecoli | rl4_ecoli  |
| P21513 | RNE_ECOLI | * | P21513 | P0A7K2 | rne_ecoli | rl7_ecoli  |
| P21513 | RNE_ECOLI | * | P21513 | P0A7R1 | rne_ecoli | rl9_ecoli  |
| P21513 | RNE_ECOLI | * | P21513 | P0A7R1 | rne_ecoli | rl9_ecoli  |
| P21513 | RNE_ECOLI | * | P21513 | P75864 | rne_ecoli | rlml_ecoli |
| P21513 | RNE_ECOLI | * | P21513 | P37765 | rne_ecoli | rlub_ecoli |
| P21513 | RNE_ECOLI | * | P21513 | P21499 | rne_ecoli | rnr_ecoli  |
| P21513 | RNE_ECOLI | * | P21513 | P0A7R5 | rne_ecoli | rs10_ecoli |
| P21513 | RNE_ECOLI | * | P21513 | P0A7T3 | rne_ecoli | rs16_ecoli |
| P21513 | RNE_ECOLI | * | P21513 | P0A7V0 | rne_ecoli | rs2_ecoli  |
| P21513 | RNE_ECOLI | * | P21513 | P0A7U7 | rne_ecoli | rs20_ecoli |
| P21513 | RNE_ECOLI | * | P21513 | P68679 | rne_ecoli | rs21_ecoli |
| P21513 | RNE_ECOLI | * | P21513 | P0A7V3 | rne_ecoli | rs3_ecoli  |
| P21513 | RNE_ECOLI | * | P21513 | P0A7V8 | rne_ecoli | rs4_ecoli  |
| P21513 | RNE_ECOLI | * | P21513 | P0A7V8 | rne_ecoli | rs4_ecoli  |
| P21513 | RNE_ECOLI | * | P21513 | P0A7W1 | rne_ecoli | rs5_ecoli  |
| P21513 | RNE_ECOLI | * | P21513 | P02358 | rne_ecoli | rs6_ecoli  |
| P21513 | RNE_ECOLI | * | P21513 | P02359 | rne_ecoli | rs7_ecoli  |
| P21513 | RNE_ECOLI | * | P21513 | P02359 | rne_ecoli | rs7_ecoli  |
| P21513 | RNE_ECOLI | * | P21513 | P77468 | rne_ecoli | sfmd_ecoli |
| P21513 | RNE_ECOLI | * | P21513 | P77468 | rne_ecoli | sfmd_ecoli |
| P21513 | RNE_ECOLI | * | P21513 | P77468 | rne_ecoli | sfmd_ecoli |
| P21513 | RNE_ECOLI | * | P21513 | P77468 | rne_ecoli | sfmd_ecoli |
| P21513 | RNE_ECOLI | * | P21513 | P77468 | rne_ecoli | sfmd_ecoli |
| P21513 | RNE_ECOLI | * | P21513 | P21507 | rne_ecoli | srmb_ecoli |
| P21513 | RNE_ECOLI | * | P21513 | P33570 | rne_ecoli | tkt2_ecoli |
| P21513 | RNE_ECOLI | * | P21513 | P33570 | rne_ecoli | tkt2_ecoli |
| P21513 | RNE_ECOLI | * | P21513 | P33570 | rne_ecoli | tkt2_ecoli |
| P21513 | RNE_ECOLI | * | P21513 | P33570 | rne_ecoli | tkt2_ecoli |
| P21513 | RNE_ECOLI | * | P21513 | P33570 | rne_ecoli | tkt2_ecoli |
| P21513 | RNE_ECOLI | * | P21513 | P33570 | rne_ecoli | tkt2_ecoli |
| P21513 | RNE_ECOLI | * | P21513 | P33570 | rne_ecoli | tkt2_ecoli |
| P21513 | RNE_ECOLI | * | P21513 | P33570 | rne_ecoli | tkt2_ecoli |
| P21513 | RNE_ECOLI | * | P21513 | P0AB26 | rne_ecoli | yceb_ecoli |
| P21513 | RNE_ECOLI | * | P21513 | P0AB26 | rne_ecoli | yceb_ecoli |

|        |           |   |        |        |           |            |
|--------|-----------|---|--------|--------|-----------|------------|
| P21513 | RNE_ECOLI | * | P21513 | P0AB26 | rne_ecoli | yceb_ecoli |
| P21513 | RNE_ECOLI | * | P21513 | P75990 | rne_ecoli | ycgf_ecoli |
| P21513 | RNE_ECOLI | * | P21513 | P75990 | rne_ecoli | ycgf_ecoli |
| P21513 | RNE_ECOLI | * | P21513 | P75995 | rne_ecoli | ycgg_ecoli |
| P21513 | RNE_ECOLI | * | P21513 | P75995 | rne_ecoli | ycgg_ecoli |
| P21513 | RNE_ECOLI | * | P21513 | P75995 | rne_ecoli | ycgg_ecoli |
| P21513 | RNE_ECOLI | * | P21513 | P75995 | rne_ecoli | ycgg_ecoli |
| P21513 | RNE_ECOLI | * | P21513 | P75995 | rne_ecoli | ycgg_ecoli |
| P21513 | RNE_ECOLI | * | P21513 | P75995 | rne_ecoli | ycgg_ecoli |
| P21513 | RNE_ECOLI | * | P21513 | P75995 | rne_ecoli | ycgg_ecoli |
| P21513 | RNE_ECOLI | * | P21513 | P0AGJ5 | rne_ecoli | yfif_ecoli |
| P21513 | RNE_ECOLI | * | P21513 | P76594 | rne_ecoli | yfiq_ecoli |
| P21513 | RNE_ECOLI | * | P21513 | P37641 | rne_ecoli | yhjc_ecoli |
| P21513 | RNE_ECOLI | * | P21513 | P37641 | rne_ecoli | yhjc_ecoli |
|        |           |   |        |        |           |            |
| P0A9J0 | RNG_ECOLI | * | P0A9J0 | P0A6Y8 | rng_ecoli | dnak_ecoli |
| P0A9J0 | RNG_ECOLI | * | P0A9J0 | P0A6P9 | rng_ecoli | eno_ecoli  |
| P0A9J0 | RNG_ECOLI | * | P0A9J0 | P15033 | rng_ecoli | racc_ecoli |
| P0A9J0 | RNG_ECOLI | * | P0A9J0 | P0AG44 | rng_ecoli | rl17_ecoli |
| P0A9J0 | RNG_ECOLI | * | P0A9J0 | P60422 | rng_ecoli | rl2_ecoli  |
| P0A9J0 | RNG_ECOLI | * | P0A9J0 | P0AG07 | rng_ecoli | rpe_ecoli  |
| P0A9J0 | RNG_ECOLI | * | P0A9J0 | P0A7S9 | rng_ecoli | rs13_ecoli |
| P0A9J0 | RNG_ECOLI | * | P0A9J0 | P0ADZ4 | rng_ecoli | rs15_ecoli |
| P0A9J0 | RNG_ECOLI | * | P0A9J0 | P0A7U3 | rng_ecoli | rs19_ecoli |
| P0A9J0 | RNG_ECOLI | * | P0A9J0 | P0A7V0 | rng_ecoli | rs2_ecoli  |
| P0A9J0 | RNG_ECOLI | * | P0A9J0 | P0A7U7 | rng_ecoli | rs20_ecoli |
| P0A9J0 | RNG_ECOLI | * | P0A9J0 | P68679 | rng_ecoli | rs21_ecoli |
| P0A9J0 | RNG_ECOLI | * | P0A9J0 | P0A7V3 | rng_ecoli | rs3_ecoli  |
| P0A9J0 | RNG_ECOLI | * | P0A9J0 | P0A7V8 | rng_ecoli | rs4_ecoli  |
| P0A9J0 | RNG_ECOLI | * | P0A9J0 | P0A7W1 | rng_ecoli | rs5_ecoli  |
| P0A9J0 | RNG_ECOLI | * | P0A9J0 | P0A7X3 | rng_ecoli | rs9_ecoli  |
| P0A9J0 | RNG_ECOLI | * | P0A9J0 | P0A7X3 | rng_ecoli | rs9_ecoli  |
|        |           |   |        |        |           |            |
| P21338 | RNI_ECOLI |   | none   |        |           |            |
|        |           |   |        |        |           |            |
| P21499 | RNR_ECOLI | * | P21499 | P06961 | rnr_ecoli | cca_ecoli  |
| P21499 | RNR_ECOLI | * | P21499 | P0ACF0 | rnr_ecoli | dbha_ecoli |
| P21499 | RNR_ECOLI | * | P21499 | P0A9P6 | rnr_ecoli | dead_ecoli |
| P21499 | RNR_ECOLI | * | P21499 | P0A707 | rnr_ecoli | if3_ecoli  |
| P21499 | RNR_ECOLI | * | P21499 | P0A6X7 | rnr_ecoli | ihfa_ecoli |
| P21499 | RNR_ECOLI | * | P21499 | P32053 | rnr_ecoli | inta_ecoli |
| P21499 | RNR_ECOLI | * | P21499 | P36938 | rnr_ecoli | pgm_ecoli  |
| P21499 | RNR_ECOLI | * | P21499 | P23830 | rnr_ecoli | pss_ecoli  |
| P21499 | RNR_ECOLI | * | P21499 | P0A7L0 | rnr_ecoli | rl1_ecoli  |
| P21499 | RNR_ECOLI | * | P21499 | P0A7L0 | rnr_ecoli | rl1_ecoli  |

|        |           |   |        |        |           |            |
|--------|-----------|---|--------|--------|-----------|------------|
| P21499 | RNR_ECOLI | * | P21499 | P0AA10 | rnr_ecoli | rl13_ecoli |
| P21499 | RNR_ECOLI | * | P21499 | P0AA10 | rnr_ecoli | rl13_ecoli |
| P21499 | RNR_ECOLI | * | P21499 | P0ADY3 | rnr_ecoli | rl14_ecoli |
| P21499 | RNR_ECOLI | * | P21499 | P02413 | rnr_ecoli | rl15_ecoli |
| P21499 | RNR_ECOLI | * | P21499 | P02413 | rnr_ecoli | rl15_ecoli |
| P21499 | RNR_ECOLI | * | P21499 | P0ADY7 | rnr_ecoli | rl16_ecoli |
| P21499 | RNR_ECOLI | * | P21499 | P60422 | rnr_ecoli | rl2_ecoli  |
| P21499 | RNR_ECOLI | * | P21499 | P60422 | rnr_ecoli | rl2_ecoli  |
| P21499 | RNR_ECOLI | * | P21499 | P0A7L3 | rnr_ecoli | rl20_ecoli |
| P21499 | RNR_ECOLI | * | P21499 | P0AG48 | rnr_ecoli | rl21_ecoli |
| P21499 | RNR_ECOLI | * | P21499 | P61175 | rnr_ecoli | rl22_ecoli |
| P21499 | RNR_ECOLI | * | P21499 | P0ADZ0 | rnr_ecoli | rl23_ecoli |
| P21499 | RNR_ECOLI | * | P21499 | P60624 | rnr_ecoli | rl24_ecoli |
| P21499 | RNR_ECOLI | * | P21499 | P60438 | rnr_ecoli | rl3_ecoli  |
| P21499 | RNR_ECOLI | * | P21499 | P60438 | rnr_ecoli | rl3_ecoli  |
| P21499 | RNR_ECOLI | * | P21499 | P60723 | rnr_ecoli | rl4_ecoli  |
| P21499 | RNR_ECOLI | * | P21499 | P60723 | rnr_ecoli | rl4_ecoli  |
| P21499 | RNR_ECOLI | * | P21499 | P0AG55 | rnr_ecoli | rl6_ecoli  |
| P21499 | RNR_ECOLI | * | P21499 | P0A7R1 | rnr_ecoli | rl9_ecoli  |
| P21499 | RNR_ECOLI | * | P21499 | P0A7R1 | rnr_ecoli | rl9_ecoli  |
| P21499 | RNR_ECOLI | * | P21499 | P75864 | rnr_ecoli | rlml_ecoli |
| P21499 | RNR_ECOLI | * | P21499 | P0AA39 | rnr_ecoli | rluc_ecoli |
| P21499 | RNR_ECOLI | * | P21499 | P0AG67 | rnr_ecoli | rs1_ecoli  |
| P21499 | RNR_ECOLI | * | P21499 | P0A7R9 | rnr_ecoli | rs11_ecoli |
| P21499 | RNR_ECOLI | * | P21499 | P0A7S9 | rnr_ecoli | rs13_ecoli |
| P21499 | RNR_ECOLI | * | P21499 | P0A7S9 | rnr_ecoli | rs13_ecoli |
| P21499 | RNR_ECOLI | * | P21499 | P0AG59 | rnr_ecoli | rs14_ecoli |
| P21499 | RNR_ECOLI | * | P21499 | P0ADZ4 | rnr_ecoli | rs15_ecoli |
| P21499 | RNR_ECOLI | * | P21499 | P0A7T3 | rnr_ecoli | rs16_ecoli |
| P21499 | RNR_ECOLI | * | P21499 | P0A7T3 | rnr_ecoli | rs16_ecoli |
| P21499 | RNR_ECOLI | * | P21499 | P0A7T7 | rnr_ecoli | rs18_ecoli |
| P21499 | RNR_ECOLI | * | P21499 | P0A7V0 | rnr_ecoli | rs2_ecoli  |
| P21499 | RNR_ECOLI | * | P21499 | P0A7V0 | rnr_ecoli | rs2_ecoli  |
| P21499 | RNR_ECOLI | * | P21499 | P0A7U7 | rnr_ecoli | rs20_ecoli |
| P21499 | RNR_ECOLI | * | P21499 | P68679 | rnr_ecoli | rs21_ecoli |
| P21499 | RNR_ECOLI | * | P21499 | P0A7V3 | rnr_ecoli | rs3_ecoli  |
| P21499 | RNR_ECOLI | * | P21499 | P0A7V8 | rnr_ecoli | rs4_ecoli  |
| P21499 | RNR_ECOLI | * | P21499 | P0A7V8 | rnr_ecoli | rs4_ecoli  |
| P21499 | RNR_ECOLI | * | P21499 | P0A7W1 | rnr_ecoli | rs5_ecoli  |
| P21499 | RNR_ECOLI | * | P21499 | P0A7W1 | rnr_ecoli | rs5_ecoli  |
| P21499 | RNR_ECOLI | * | P21499 | P02358 | rnr_ecoli | rs6_ecoli  |
| P21499 | RNR_ECOLI | * | P21499 | P02358 | rnr_ecoli | rs6_ecoli  |
| P21499 | RNR_ECOLI | * | P21499 | P02359 | rnr_ecoli | rs7_ecoli  |
| P21499 | RNR_ECOLI | * | P21499 | P02359 | rnr_ecoli | rs7_ecoli  |
| P21499 | RNR_ECOLI | * | P21499 | P0A7W7 | rnr_ecoli | rs8_ecoli  |

|        |            |      |        |        |            |            |
|--------|------------|------|--------|--------|------------|------------|
| P21499 | RNR_ECOLI  | *    | P21499 | P0A7X3 | rnr_ecoli  | rs9_ecoli  |
| P21499 | RNR_ECOLI  | *    | P21499 | P0A847 | rnr_ecoli  | tgt_ecoli  |
| P21499 | RNR_ECOLI  | *    | P21499 | P0AGJ5 | rnr_ecoli  | yfif_ecoli |
| P21499 | RNR_ECOLI  | *    | P21499 | P30871 | rnr_ecoli  | ygif_ecoli |
| POACIO | ROB_ECOLI  | none |        |        |            |            |
| POA7Z0 | RPIA_ECOLI | none |        |        |            |            |
| P0A7Z4 | RPOA_ECOLI | *    | P0A7Z4 | P0A9Y6 | rpoa_ecoli | cspc_ecoli |
| P0A7Z4 | RPOA_ECOLI | *    | P0A7Z4 | P0ACF0 | rpoa_ecoli | dbha_ecoli |
| P0A7Z4 | RPOA_ECOLI | *    | P0A7Z4 | P38134 | rpoa_ecoli | etk_ecoli  |
| P0A7Z4 | RPOA_ECOLI | *    | P0A7Z4 | P0A9A9 | rpoa_ecoli | fur_ecoli  |
| P0A7Z4 | RPOA_ECOLI | *    | P0A7Z4 | P0A6W5 | rpoa_ecoli | grea_ecoli |
| P0A7Z4 | RPOA_ECOLI | *    | P0A7Z4 | P30128 | rpoa_ecoli | greb_ecoli |
| P0A7Z4 | RPOA_ECOLI | *    | P0A7Z4 | P0AAN1 | rpoa_ecoli | hybe_ecoli |
| P0A7Z4 | RPOA_ECOLI | *    | P0A7Z4 | P0A9X4 | rpoa_ecoli | mreb_ecoli |
| P0A7Z4 | RPOA_ECOLI | *    | P0A7Z4 | P0AFF6 | rpoa_ecoli | nusa_ecoli |
| P0A7Z4 | RPOA_ECOLI | *    | P0A7Z4 | P0AFF6 | rpoa_ecoli | nusa_ecoli |
| P0A7Z4 | RPOA_ECOLI | *    | P0A7Z4 | P0AFG0 | rpoa_ecoli | nusg_ecoli |
| P0A7Z4 | RPOA_ECOLI | *    | P0A7Z4 | P0AFG0 | rpoa_ecoli | nusg_ecoli |
| P0A7Z4 | RPOA_ECOLI | *    | P0A7Z4 | P0AFG8 | rpoa_ecoli | odp1_ecoli |
| P0A7Z4 | RPOA_ECOLI | *    | P0A7Z4 | P06959 | rpoa_ecoli | odp2_ecoli |
| P0A7Z4 | RPOA_ECOLI | *    | P0A7Z4 | P23830 | rpoa_ecoli | pss_ecoli  |
| P0A7Z4 | RPOA_ECOLI | *    | P0A7Z4 | P0A9M8 | rpoa_ecoli | pta_ecoli  |
| P0A7Z4 | RPOA_ECOLI | *    | P0A7Z4 | P60240 | rpoa_ecoli | rapa_ecoli |
| P0A7Z4 | RPOA_ECOLI | *    | P0A7Z4 | P60240 | rpoa_ecoli | rapa_ecoli |
| P0A7Z4 | RPOA_ECOLI | *    | P0A7Z4 | P60240 | rpoa_ecoli | rapa_ecoli |
| P0A7Z4 | RPOA_ECOLI | *    | P0A7Z4 | P0AG30 | rpoa_ecoli | rho_ecoli  |
| P0A7Z4 | RPOA_ECOLI | *    | P0A7Z4 | P0A7L0 | rpoa_ecoli | rl1_ecoli  |
| P0A7Z4 | RPOA_ECOLI | *    | P0A7Z4 | P0AA10 | rpoa_ecoli | rl13_ecoli |
| P0A7Z4 | RPOA_ECOLI | *    | P0A7Z4 | P0AA10 | rpoa_ecoli | rl13_ecoli |
| P0A7Z4 | RPOA_ECOLI | *    | P0A7Z4 | P02413 | rpoa_ecoli | rl15_ecoli |
| P0A7Z4 | RPOA_ECOLI | *    | P0A7Z4 | P02413 | rpoa_ecoli | rl15_ecoli |
| P0A7Z4 | RPOA_ECOLI | *    | P0A7Z4 | P0ADY7 | rpoa_ecoli | rl16_ecoli |
| P0A7Z4 | RPOA_ECOLI | *    | P0A7Z4 | P0A7K6 | rpoa_ecoli | rl19_ecoli |
| P0A7Z4 | RPOA_ECOLI | *    | P0A7Z4 | P60422 | rpoa_ecoli | rl2_ecoli  |
| P0A7Z4 | RPOA_ECOLI | *    | P0A7Z4 | P60422 | rpoa_ecoli | rl2_ecoli  |
| P0A7Z4 | RPOA_ECOLI | *    | P0A7Z4 | P0AG48 | rpoa_ecoli | rl21_ecoli |
| P0A7Z4 | RPOA_ECOLI | *    | P0A7Z4 | P0ADZ0 | rpoa_ecoli | rl23_ecoli |
| P0A7Z4 | RPOA_ECOLI | *    | P0A7Z4 | P60624 | rpoa_ecoli | rl24_ecoli |
| P0A7Z4 | RPOA_ECOLI | *    | P0A7Z4 | P0A7L8 | rpoa_ecoli | rl27_ecoli |
| P0A7Z4 | RPOA_ECOLI | *    | P0A7Z4 | P0A7M2 | rpoa_ecoli | rl28_ecoli |
| P0A7Z4 | RPOA_ECOLI | *    | P0A7Z4 | P60438 | rpoa_ecoli | rl3_ecoli  |
| P0A7Z4 | RPOA_ECOLI | *    | P0A7Z4 | P0A7N9 | rpoa_ecoli | rl33_ecoli |



|        |            |   |        |        |            |             |
|--------|------------|---|--------|--------|------------|-------------|
| POA7Z4 | RPOA_ECOLI | * | POA7Z4 | P60723 | rpoa_ecoli | rl4_ecoli   |
| POA7Z4 | RPOA_ECOLI | * | POA7Z4 | P60723 | rpoa_ecoli | rl4_ecoli   |
| POA7Z4 | RPOA_ECOLI | * | POA7Z4 | P62399 | rpoa_ecoli | rl5_ecoli   |
| POA7Z4 | RPOA_ECOLI | * | POA7Z4 | P0AG55 | rpoa_ecoli | rl6_ecoli   |
| POA7Z4 | RPOA_ECOLI | * | POA7Z4 | POA7K2 | rpoa_ecoli | rl7_ecoli   |
| POA7Z4 | RPOA_ECOLI | * | POA7Z4 | POA8V2 | rpoa_ecoli | rpob_ecoli  |
| POA7Z4 | RPOA_ECOLI | * | POA7Z4 | POA8V2 | rpoa_ecoli | rpob_ecoli  |
| POA7Z4 | RPOA_ECOLI | * | POA7Z4 | POA8V2 | rpoa_ecoli | rpob_ecoli  |
| POA7Z4 | RPOA_ECOLI | * | POA7Z4 | POA8V2 | rpoa_ecoli | rpob_ecoli  |
| POA7Z4 | RPOA_ECOLI | * | POA7Z4 | POA8T7 | rpoa_ecoli | rpoc_ecoli  |
| POA7Z4 | RPOA_ECOLI | * | POA7Z4 | POA8T7 | rpoa_ecoli | rpoc_ecoli  |
| POA7Z4 | RPOA_ECOLI | * | POA7Z4 | POA8T7 | rpoa_ecoli | rpoc_ecoli  |
| POA7Z4 | RPOA_ECOLI | * | POA7Z4 | POA8T7 | rpoa_ecoli | rpoc_ecoli  |
| POA7Z4 | RPOA_ECOLI | * | POA7Z4 | P00579 | rpoa_ecoli | rpod_ecoli  |
| POA7Z4 | RPOA_ECOLI | * | POA7Z4 | P00579 | rpoa_ecoli | rpod_ecoli  |
| POA7Z4 | RPOA_ECOLI | * | POA7Z4 | P00579 | rpoa_ecoli | rpod_ecoli  |
| POA7Z4 | RPOA_ECOLI | * | POA7Z4 | POA800 | rpoa_ecoli | rpocz_ecoli |
| POA7Z4 | RPOA_ECOLI | * | POA7Z4 | POA800 | rpoa_ecoli | rpocz_ecoli |
| POA7Z4 | RPOA_ECOLI | * | POA7Z4 | POAG67 | rpoa_ecoli | rs1_ecoli   |
| POA7Z4 | RPOA_ECOLI | * | POA7Z4 | POA7R5 | rpoa_ecoli | rs10_ecoli  |
| POA7Z4 | RPOA_ECOLI | * | POA7Z4 | POA7S9 | rpoa_ecoli | rs13_ecoli  |
| POA7Z4 | RPOA_ECOLI | * | POA7Z4 | POAG59 | rpoa_ecoli | rs14_ecoli  |
| POA7Z4 | RPOA_ECOLI | * | POA7Z4 | P0ADZ4 | rpoa_ecoli | rs15_ecoli  |
| POA7Z4 | RPOA_ECOLI | * | POA7Z4 | POA7T3 | rpoa_ecoli | rs16_ecoli  |
| POA7Z4 | RPOA_ECOLI | * | POA7Z4 | POA7U3 | rpoa_ecoli | rs19_ecoli  |
| POA7Z4 | RPOA_ECOLI | * | POA7Z4 | POA7V0 | rpoa_ecoli | rs2_ecoli   |
| POA7Z4 | RPOA_ECOLI | * | POA7Z4 | POA7U7 | rpoa_ecoli | rs20_ecoli  |
| POA7Z4 | RPOA_ECOLI | * | POA7Z4 | P68679 | rpoa_ecoli | rs21_ecoli  |
| POA7Z4 | RPOA_ECOLI | * | POA7Z4 | POA7V3 | rpoa_ecoli | rs3_ecoli   |
| POA7Z4 | RPOA_ECOLI | * | POA7Z4 | POA7V8 | rpoa_ecoli | rs4_ecoli   |
| POA7Z4 | RPOA_ECOLI | * | POA7Z4 | POA7V8 | rpoa_ecoli | rs4_ecoli   |
| POA7Z4 | RPOA_ECOLI | * | POA7Z4 | POA7W1 | rpoa_ecoli | rs5_ecoli   |
| POA7Z4 | RPOA_ECOLI | * | POA7Z4 | POA7W1 | rpoa_ecoli | rs5_ecoli   |
| POA7Z4 | RPOA_ECOLI | * | POA7Z4 | POA7W1 | rpoa_ecoli | rs5_ecoli   |
| POA7Z4 | RPOA_ECOLI | * | POA7Z4 | P02358 | rpoa_ecoli | rs6_ecoli   |
| POA7Z4 | RPOA_ECOLI | * | POA7Z4 | P02359 | rpoa_ecoli | rs7_ecoli   |
| POA7Z4 | RPOA_ECOLI | * | POA7Z4 | P21889 | rpoa_ecoli | syd_ecoli   |
| POA7Z4 | RPOA_ECOLI | * | POA7Z4 | P21889 | rpoa_ecoli | syd_ecoli   |
| POA7Z4 | RPOA_ECOLI | * | POA7Z4 | P27242 | rpoa_ecoli | waau_ecoli  |
| POA7Z4 | RPOA_ECOLI | * | POA7Z4 | P27836 | rpoa_ecoli | wecg_ecoli  |
| POA8V2 | RPOB_ECOLI | * | POA8V2 | POABB4 | rpob_ecoli | atpb_ecoli  |
| POA8V2 | RPOB_ECOLI | * | POA8V2 | P06961 | rpob_ecoli | cca_ecoli   |
| POA8V2 | RPOB_ECOLI | * | POA8V2 | POABH9 | rpob_ecoli | clpa_ecoli  |
| POA8V2 | RPOB_ECOLI | * | POA8V2 | POAAE0 | rpob_ecoli | cyca_ecoli  |

|        |            |   |        |        |                            |                             |
|--------|------------|---|--------|--------|----------------------------|-----------------------------|
| POA8V2 | RPOB_ECOLI | * | POA8V2 | POA9F3 | <a href="#">rpob_ecoli</a> | <a href="#">cysb_ecoli</a>  |
| POA8V2 | RPOB_ECOLI | * | POA8V2 | P0ACF0 | <a href="#">rpob_ecoli</a> | <a href="#">dbha_ecoli</a>  |
| POA8V2 | RPOB_ECOLI | * | POA8V2 | P0ACF0 | <a href="#">rpob_ecoli</a> | <a href="#">dbha_ecoli</a>  |
| POA8V2 | RPOB_ECOLI | * | POA8V2 | P0AC41 | <a href="#">rpob_ecoli</a> | <a href="#">dhsa_ecoli</a>  |
| POA8V2 | RPOB_ECOLI | * | POA8V2 | P0CE47 | <a href="#">rpob_ecoli</a> | <a href="#">eftu1_ecoli</a> |
| POA8V2 | RPOB_ECOLI | * | POA8V2 | P76008 | <a href="#">rpob_ecoli</a> | <a href="#">ldca_ecoli</a>  |
| POA8V2 | RPOB_ECOLI | * | POA8V2 | P30958 | <a href="#">rpob_ecoli</a> | <a href="#">mfd_ecoli</a>   |
| POA8V2 | RPOB_ECOLI | * | POA8V2 | P30958 | <a href="#">rpob_ecoli</a> | <a href="#">mfd_ecoli</a>   |
| POA8V2 | RPOB_ECOLI | * | POA8V2 | P23367 | <a href="#">rpob_ecoli</a> | <a href="#">mutl_ecoli</a>  |
| POA8V2 | RPOB_ECOLI | * | POA8V2 | P0AFF6 | <a href="#">rpob_ecoli</a> | <a href="#">nusa_ecoli</a>  |
| POA8V2 | RPOB_ECOLI | * | POA8V2 | P0AFF6 | <a href="#">rpob_ecoli</a> | <a href="#">nusa_ecoli</a>  |
| POA8V2 | RPOB_ECOLI | * | POA8V2 | P0AFG0 | <a href="#">rpob_ecoli</a> | <a href="#">nusg_ecoli</a>  |
| POA8V2 | RPOB_ECOLI | * | POA8V2 | P0AFG0 | <a href="#">rpob_ecoli</a> | <a href="#">nusg_ecoli</a>  |
| POA8V2 | RPOB_ECOLI | * | POA8V2 | P76773 | <a href="#">rpob_ecoli</a> | <a href="#">ompl_ecoli</a>  |
| POA8V2 | RPOB_ECOLI | * | POA8V2 | P0AAH0 | <a href="#">rpob_ecoli</a> | <a href="#">pstb_ecoli</a>  |
| POA8V2 | RPOB_ECOLI | * | POA8V2 | P60240 | <a href="#">rpob_ecoli</a> | <a href="#">rapa_ecoli</a>  |
| POA8V2 | RPOB_ECOLI | * | POA8V2 | P0AG30 | <a href="#">rpob_ecoli</a> | <a href="#">rho_ecoli</a>   |
| POA8V2 | RPOB_ECOLI | * | POA8V2 | P24211 | <a href="#">rpob_ecoli</a> | <a href="#">rhse_ecoli</a>  |
| POA8V2 | RPOB_ECOLI | * | POA8V2 | P25539 | <a href="#">rpob_ecoli</a> | <a href="#">ribd_ecoli</a>  |
| POA8V2 | RPOB_ECOLI | * | POA8V2 | P0A7J7 | <a href="#">rpob_ecoli</a> | <a href="#">rl11_ecoli</a>  |
| POA8V2 | RPOB_ECOLI | * | POA8V2 | P60422 | <a href="#">rpob_ecoli</a> | <a href="#">rl2_ecoli</a>   |
| POA8V2 | RPOB_ECOLI | * | POA8V2 | P60422 | <a href="#">rpob_ecoli</a> | <a href="#">rl2_ecoli</a>   |
| POA8V2 | RPOB_ECOLI | * | POA8V2 | P61175 | <a href="#">rpob_ecoli</a> | <a href="#">rl22_ecoli</a>  |
| POA8V2 | RPOB_ECOLI | * | POA8V2 | P0A7N9 | <a href="#">rpob_ecoli</a> | <a href="#">rl33_ecoli</a>  |
| POA8V2 | RPOB_ECOLI | * | POA8V2 | P60723 | <a href="#">rpob_ecoli</a> | <a href="#">rl4_ecoli</a>   |
| POA8V2 | RPOB_ECOLI | * | POA8V2 | P0A7K2 | <a href="#">rpob_ecoli</a> | <a href="#">rl7_ecoli</a>   |
| POA8V2 | RPOB_ECOLI | * | POA8V2 | P77611 | <a href="#">rpob_ecoli</a> | <a href="#">rnfc_ecoli</a>  |
| POA8V2 | RPOB_ECOLI | * | POA8V2 | P0AGB3 | <a href="#">rpob_ecoli</a> | <a href="#">rp32_ecoli</a>  |
| POA8V2 | RPOB_ECOLI | * | POA8V2 | P24255 | <a href="#">rpob_ecoli</a> | <a href="#">rp54_ecoli</a>  |
| POA8V2 | RPOB_ECOLI | * | POA8V2 | P0A7Z4 | <a href="#">rpob_ecoli</a> | <a href="#">rpoa_ecoli</a>  |
| POA8V2 | RPOB_ECOLI | * | POA8V2 | P0A7Z4 | <a href="#">rpob_ecoli</a> | <a href="#">rpoa_ecoli</a>  |
| POA8V2 | RPOB_ECOLI | * | POA8V2 | P0A8T7 | <a href="#">rpob_ecoli</a> | <a href="#">rpoc_ecoli</a>  |
| POA8V2 | RPOB_ECOLI | * | POA8V2 | P0A8T7 | <a href="#">rpob_ecoli</a> | <a href="#">rpoc_ecoli</a>  |
| POA8V2 | RPOB_ECOLI | * | POA8V2 | P0A8T7 | <a href="#">rpob_ecoli</a> | <a href="#">rpoc_ecoli</a>  |
| POA8V2 | RPOB_ECOLI | * | POA8V2 | P00579 | <a href="#">rpob_ecoli</a> | <a href="#">rpod_ecoli</a>  |
| POA8V2 | RPOB_ECOLI | * | POA8V2 | P00579 | <a href="#">rpob_ecoli</a> | <a href="#">rpod_ecoli</a>  |
| POA8V2 | RPOB_ECOLI | * | POA8V2 | P13445 | <a href="#">rpob_ecoli</a> | <a href="#">rpos_ecoli</a>  |
| POA8V2 | RPOB_ECOLI | * | POA8V2 | P0A800 | <a href="#">rpob_ecoli</a> | <a href="#">rpoz_ecoli</a>  |
| POA8V2 | RPOB_ECOLI | * | POA8V2 | P0A800 | <a href="#">rpob_ecoli</a> | <a href="#">rpoz_ecoli</a>  |
| POA8V2 | RPOB_ECOLI | * | POA8V2 | P0A7R5 | <a href="#">rpob_ecoli</a> | <a href="#">rs10_ecoli</a>  |
| POA8V2 | RPOB_ECOLI | * | POA8V2 | P0A7R5 | <a href="#">rpob_ecoli</a> | <a href="#">rs10_ecoli</a>  |
| POA8V2 | RPOB_ECOLI | * | POA8V2 | P0AG59 | <a href="#">rpob_ecoli</a> | <a href="#">rs14_ecoli</a>  |
| POA8V2 | RPOB_ECOLI | * | POA8V2 | P0A7U7 | <a href="#">rpob_ecoli</a> | <a href="#">rs20_ecoli</a>  |
| POA8V2 | RPOB_ECOLI | * | POA8V2 | P68679 | <a href="#">rpob_ecoli</a> | <a href="#">rs21_ecoli</a>  |
| POA8V2 | RPOB_ECOLI | * | POA8V2 | P0A7V3 | <a href="#">rpob_ecoli</a> | <a href="#">rs3_ecoli</a>   |

|        |            |   |        |        |                            |                            |
|--------|------------|---|--------|--------|----------------------------|----------------------------|
| POA8V2 | RPOB_ECOLI | * | POA8V2 | POA7W1 | <a href="#">rpob_ecoli</a> | <a href="#">rs5_ecoli</a>  |
| POA8V2 | RPOB_ECOLI | * | POA8V2 | P02358 | <a href="#">rpob_ecoli</a> | <a href="#">rs6_ecoli</a>  |
| POA8V2 | RPOB_ECOLI | * | POA8V2 | P10408 | <a href="#">rpob_ecoli</a> | <a href="#">seca_ecoli</a> |
| POA8V2 | RPOB_ECOLI | * | POA8V2 | P38684 | <a href="#">rpob_ecoli</a> | <a href="#">torr_ecoli</a> |
| POA8V2 | RPOB_ECOLI | * | POA8V2 | Q46814 | <a href="#">rpob_ecoli</a> | <a href="#">xdhd_ecoli</a> |
| POA8V2 | RPOB_ECOLI | * | POA8V2 | POA8E5 | <a href="#">rpob_ecoli</a> | <a href="#">yacl_ecoli</a> |
| POA8V2 | RPOB_ECOLI | * | POA8V2 | P75694 | <a href="#">rpob_ecoli</a> | <a href="#">yaho_ecoli</a> |
| POA8V2 | RPOB_ECOLI | * | POA8V2 | POA9U1 | <a href="#">rpob_ecoli</a> | <a href="#">ybhf_ecoli</a> |
| POA8V2 | RPOB_ECOLI | * | POA8V2 | P60872 | <a href="#">rpob_ecoli</a> | <a href="#">yide_ecoli</a> |
| POA8T7 | RPOC_ECOLI | * | POA8T7 | P63284 | <a href="#">rpoc_ecoli</a> | <a href="#">clpb_ecoli</a> |
| POA8T7 | RPOC_ECOLI | * | POA8T7 | P22255 | <a href="#">rpoc_ecoli</a> | <a href="#">cysq_ecoli</a> |
| POA8T7 | RPOC_ECOLI | * | POA8T7 | P0ACF0 | <a href="#">rpoc_ecoli</a> | <a href="#">dbha_ecoli</a> |
| POA8T7 | RPOC_ECOLI | * | POA8T7 | P0AC41 | <a href="#">rpoc_ecoli</a> | <a href="#">dhsa_ecoli</a> |
| POA8T7 | RPOC_ECOLI | * | POA8T7 | POA6Y8 | <a href="#">rpoc_ecoli</a> | <a href="#">dnak_ecoli</a> |
| POA8T7 | RPOC_ECOLI | * | POA8T7 | P77609 | <a href="#">rpoc_ecoli</a> | <a href="#">flxa_ecoli</a> |
| POA8T7 | RPOC_ECOLI | * | POA8T7 | P0AC23 | <a href="#">rpoc_ecoli</a> | <a href="#">foca_ecoli</a> |
| POA8T7 | RPOC_ECOLI | * | POA8T7 | P46889 | <a href="#">rpoc_ecoli</a> | <a href="#">ftsk_ecoli</a> |
| POA8T7 | RPOC_ECOLI | * | POA8T7 | P30128 | <a href="#">rpoc_ecoli</a> | <a href="#">greb_ecoli</a> |
| POA8T7 | RPOC_ECOLI | * | POA8T7 | P06983 | <a href="#">rpoc_ecoli</a> | <a href="#">hem3_ecoli</a> |
| POA8T7 | RPOC_ECOLI | * | POA8T7 | POA6Z3 | <a href="#">rpoc_ecoli</a> | <a href="#">htpg_ecoli</a> |
| POA8T7 | RPOC_ECOLI | * | POA8T7 | POA9M0 | <a href="#">rpoc_ecoli</a> | <a href="#">lon_ecoli</a>  |
| POA8T7 | RPOC_ECOLI | * | POA8T7 | P13009 | <a href="#">rpoc_ecoli</a> | <a href="#">meth_ecoli</a> |
| POA8T7 | RPOC_ECOLI | * | POA8T7 | P0AFF6 | <a href="#">rpoc_ecoli</a> | <a href="#">nusa_ecoli</a> |
| POA8T7 | RPOC_ECOLI | * | POA8T7 | P0AFG0 | <a href="#">rpoc_ecoli</a> | <a href="#">nusg_ecoli</a> |
| POA8T7 | RPOC_ECOLI | * | POA8T7 | P0AFG0 | <a href="#">rpoc_ecoli</a> | <a href="#">nusg_ecoli</a> |
| POA8T7 | RPOC_ECOLI | * | POA8T7 | P00490 | <a href="#">rpoc_ecoli</a> | <a href="#">phsm_ecoli</a> |
| POA8T7 | RPOC_ECOLI | * | POA8T7 | P17888 | <a href="#">rpoc_ecoli</a> | <a href="#">pria_ecoli</a> |
| POA8T7 | RPOC_ECOLI | * | POA8T7 | P60240 | <a href="#">rpoc_ecoli</a> | <a href="#">rapa_ecoli</a> |
| POA8T7 | RPOC_ECOLI | * | POA8T7 | P60240 | <a href="#">rpoc_ecoli</a> | <a href="#">rapa_ecoli</a> |
| POA8T7 | RPOC_ECOLI | * | POA8T7 | P16919 | <a href="#">rpoc_ecoli</a> | <a href="#">rbsd_ecoli</a> |
| POA8T7 | RPOC_ECOLI | * | POA8T7 | P0AA10 | <a href="#">rpoc_ecoli</a> | <a href="#">rl13_ecoli</a> |
| POA8T7 | RPOC_ECOLI | * | POA8T7 | P02413 | <a href="#">rpoc_ecoli</a> | <a href="#">rl15_ecoli</a> |
| POA8T7 | RPOC_ECOLI | * | POA8T7 | P0ADY7 | <a href="#">rpoc_ecoli</a> | <a href="#">rl16_ecoli</a> |
| POA8T7 | RPOC_ECOLI | * | POA8T7 | P0AG44 | <a href="#">rpoc_ecoli</a> | <a href="#">rl17_ecoli</a> |
| POA8T7 | RPOC_ECOLI | * | POA8T7 | POA7K6 | <a href="#">rpoc_ecoli</a> | <a href="#">rl19_ecoli</a> |
| POA8T7 | RPOC_ECOLI | * | POA8T7 | P60422 | <a href="#">rpoc_ecoli</a> | <a href="#">rl2_ecoli</a>  |
| POA8T7 | RPOC_ECOLI | * | POA8T7 | P60422 | <a href="#">rpoc_ecoli</a> | <a href="#">rl2_ecoli</a>  |
| POA8T7 | RPOC_ECOLI | * | POA8T7 | P60422 | <a href="#">rpoc_ecoli</a> | <a href="#">rl2_ecoli</a>  |
| POA8T7 | RPOC_ECOLI | * | POA8T7 | P61175 | <a href="#">rpoc_ecoli</a> | <a href="#">rl22_ecoli</a> |
| POA8T7 | RPOC_ECOLI | * | POA8T7 | P60624 | <a href="#">rpoc_ecoli</a> | <a href="#">rl24_ecoli</a> |
| POA8T7 | RPOC_ECOLI | * | POA8T7 | P60438 | <a href="#">rpoc_ecoli</a> | <a href="#">rl3_ecoli</a>  |
| POA8T7 | RPOC_ECOLI | * | POA8T7 | P60438 | <a href="#">rpoc_ecoli</a> | <a href="#">rl3_ecoli</a>  |
| POA8T7 | RPOC_ECOLI | * | POA8T7 | P60723 | <a href="#">rpoc_ecoli</a> | <a href="#">rl4_ecoli</a>  |
| POA8T7 | RPOC_ECOLI | * | POA8T7 | POA7R1 | <a href="#">rpoc_ecoli</a> | <a href="#">rl9_ecoli</a>  |

|        |            |   |        |        |                            |                             |
|--------|------------|---|--------|--------|----------------------------|-----------------------------|
| POA8T7 | RPOC_ECOLI | * | POA8T7 | POA7Z4 | <a href="#">rpoc_ecoli</a> | <a href="#">rpoa_ecoli</a>  |
| POA8T7 | RPOC_ECOLI | * | POA8T7 | POA7Z4 | <a href="#">rpoc_ecoli</a> | <a href="#">rpoa_ecoli</a>  |
| POA8T7 | RPOC_ECOLI | * | POA8T7 | POA7Z4 | <a href="#">rpoc_ecoli</a> | <a href="#">rpoa_ecoli</a>  |
| POA8T7 | RPOC_ECOLI | * | POA8T7 | POA7Z4 | <a href="#">rpoc_ecoli</a> | <a href="#">rpoa_ecoli</a>  |
| POA8T7 | RPOC_ECOLI | * | POA8T7 | POA7Z4 | <a href="#">rpoc_ecoli</a> | <a href="#">rpoa_ecoli</a>  |
| POA8T7 | RPOC_ECOLI | * | POA8T7 | POA8V2 | <a href="#">rpoc_ecoli</a> | <a href="#">rpob_ecoli</a>  |
| POA8T7 | RPOC_ECOLI | * | POA8T7 | POA8V2 | <a href="#">rpoc_ecoli</a> | <a href="#">rpob_ecoli</a>  |
| POA8T7 | RPOC_ECOLI | * | POA8T7 | POA8V2 | <a href="#">rpoc_ecoli</a> | <a href="#">rpob_ecoli</a>  |
| POA8T7 | RPOC_ECOLI | * | POA8T7 | POA8V2 | <a href="#">rpoc_ecoli</a> | <a href="#">rpob_ecoli</a>  |
| POA8T7 | RPOC_ECOLI | * | POA8T7 | P00579 | <a href="#">rpoc_ecoli</a> | <a href="#">rpod_ecoli</a>  |
| POA8T7 | RPOC_ECOLI | * | POA8T7 | P00579 | <a href="#">rpoc_ecoli</a> | <a href="#">rpod_ecoli</a>  |
| POA8T7 | RPOC_ECOLI | * | POA8T7 | P00579 | <a href="#">rpoc_ecoli</a> | <a href="#">rpod_ecoli</a>  |
| POA8T7 | RPOC_ECOLI | * | POA8T7 | P00579 | <a href="#">rpoc_ecoli</a> | <a href="#">rpod_ecoli</a>  |
| POA8T7 | RPOC_ECOLI | * | POA8T7 | POA800 | <a href="#">rpoc_ecoli</a> | <a href="#">rpoz_ecoli</a>  |
| POA8T7 | RPOC_ECOLI | * | POA8T7 | POA800 | <a href="#">rpoc_ecoli</a> | <a href="#">rpoz_ecoli</a>  |
| POA8T7 | RPOC_ECOLI | * | POA8T7 | POAG67 | <a href="#">rpoc_ecoli</a> | <a href="#">rs1_ecoli</a>   |
| POA8T7 | RPOC_ECOLI | * | POA8T7 | POA7R5 | <a href="#">rpoc_ecoli</a> | <a href="#">rs10_ecoli</a>  |
| POA8T7 | RPOC_ECOLI | * | POA8T7 | POA7S9 | <a href="#">rpoc_ecoli</a> | <a href="#">rs13_ecoli</a>  |
| POA8T7 | RPOC_ECOLI | * | POA8T7 | POA7T3 | <a href="#">rpoc_ecoli</a> | <a href="#">rs16_ecoli</a>  |
| POA8T7 | RPOC_ECOLI | * | POA8T7 | POA7V3 | <a href="#">rpoc_ecoli</a> | <a href="#">rs3_ecoli</a>   |
| POA8T7 | RPOC_ECOLI | * | POA8T7 | POA7V8 | <a href="#">rpoc_ecoli</a> | <a href="#">rs4_ecoli</a>   |
| POA8T7 | RPOC_ECOLI | * | POA8T7 | POA7V8 | <a href="#">rpoc_ecoli</a> | <a href="#">rs4_ecoli</a>   |
| POA8T7 | RPOC_ECOLI | * | POA8T7 | POA7W1 | <a href="#">rpoc_ecoli</a> | <a href="#">rs5_ecoli</a>   |
| POA8T7 | RPOC_ECOLI | * | POA8T7 | POA7W1 | <a href="#">rpoc_ecoli</a> | <a href="#">rs5_ecoli</a>   |
| POA8T7 | RPOC_ECOLI | * | POA8T7 | P02359 | <a href="#">rpoc_ecoli</a> | <a href="#">rs7_ecoli</a>   |
| POA8T7 | RPOC_ECOLI | * | POA8T7 | P02359 | <a href="#">rpoc_ecoli</a> | <a href="#">rs7_ecoli</a>   |
| POA8T7 | RPOC_ECOLI | * | POA8T7 | P77324 | <a href="#">rpoc_ecoli</a> | <a href="#">yags_ecoli</a>  |
| POA8T7 | RPOC_ECOLI | * | POA8T7 | P75989 | <a href="#">rpoc_ecoli</a> | <a href="#">ycge_ecoli</a>  |
| POA8T7 | RPOC_ECOLI | * | POA8T7 | Q47138 | <a href="#">rpoc_ecoli</a> | <a href="#">ydfe_ecoli</a>  |
| POA8T7 | RPOC_ECOLI | * | POA8T7 | P0AA49 | <a href="#">rpoc_ecoli</a> | <a href="#">yfdv_ecoli</a>  |
| POA8T7 | RPOC_ECOLI | * | POA8T7 | Q46906 | <a href="#">rpoc_ecoli</a> | <a href="#">ygcp_ecoli</a>  |
| POA8T7 | RPOC_ECOLI | * | POA8T7 | P32689 | <a href="#">rpoc_ecoli</a> | <a href="#">yjbh_ecoli</a>  |
| POA8T7 | RPOC_ECOLI | * | POA8T7 | P77759 | <a href="#">rpoc_ecoli</a> | <a href="#">ylbh_ecoli</a>  |
|        |            |   |        |        |                            |                             |
| P00579 | RPOD_ECOLI | * | P00579 | P0ABD5 | <a href="#">rpod_ecoli</a> | <a href="#">acca_ecoli</a>  |
| P00579 | RPOD_ECOLI | * | P00579 | P0A901 | <a href="#">rpod_ecoli</a> | <a href="#">blc_ecoli</a>   |
| P00579 | RPOD_ECOLI | * | P00579 | P0CE47 | <a href="#">rpod_ecoli</a> | <a href="#">eftu1_ecoli</a> |
| P00579 | RPOD_ECOLI | * | P00579 | P37639 | <a href="#">rpod_ecoli</a> | <a href="#">gadx_ecoli</a>  |
| P00579 | RPOD_ECOLI | * | P00579 | P63228 | <a href="#">rpod_ecoli</a> | <a href="#">gmhb_ecoli</a>  |
| P00579 | RPOD_ECOLI | * | P00579 | P0A705 | <a href="#">rpod_ecoli</a> | <a href="#">if2_ecoli</a>   |
| P00579 | RPOD_ECOLI | * | P00579 | P0A705 | <a href="#">rpod_ecoli</a> | <a href="#">if2_ecoli</a>   |
| P00579 | RPOD_ECOLI | * | P00579 | P77188 | <a href="#">rpod_ecoli</a> | <a href="#">matc_ecoli</a>  |
| P00579 | RPOD_ECOLI | * | P00579 | P30958 | <a href="#">rpod_ecoli</a> | <a href="#">mfd_ecoli</a>   |
| P00579 | RPOD_ECOLI | * | P00579 | P18843 | <a href="#">rpod_ecoli</a> | <a href="#">nade_ecoli</a>  |
| P00579 | RPOD_ECOLI | * | P00579 | P0AFF6 | <a href="#">rpod_ecoli</a> | <a href="#">nusa_ecoli</a>  |

|        |            |   |        |        |                            |                            |
|--------|------------|---|--------|--------|----------------------------|----------------------------|
| P00579 | RPOD_ECOLI | * | P00579 | P0AFF6 | <a href="#">rpod_ecoli</a> | <a href="#">nusa_ecoli</a> |
| P00579 | RPOD_ECOLI | * | P00579 | P37095 | <a href="#">rpod_ecoli</a> | <a href="#">pepb_ecoli</a> |
| P00579 | RPOD_ECOLI | * | P00579 | P0AFK9 | <a href="#">rpod_ecoli</a> | <a href="#">potd_ecoli</a> |
| P00579 | RPOD_ECOLI | * | P00579 | P0ABS5 | <a href="#">rpod_ecoli</a> | <a href="#">prim_ecoli</a> |
| P00579 | RPOD_ECOLI | * | P00579 | P0AG30 | <a href="#">rpod_ecoli</a> | <a href="#">rho_ecoli</a>  |
| P00579 | RPOD_ECOLI | * | P00579 | P0AG30 | <a href="#">rpod_ecoli</a> | <a href="#">rho_ecoli</a>  |
| P00579 | RPOD_ECOLI | * | P00579 | P0A7L0 | <a href="#">rpod_ecoli</a> | <a href="#">rl1_ecoli</a>  |
| P00579 | RPOD_ECOLI | * | P00579 | P0A7L0 | <a href="#">rpod_ecoli</a> | <a href="#">rl1_ecoli</a>  |
| P00579 | RPOD_ECOLI | * | P00579 | P02413 | <a href="#">rpod_ecoli</a> | <a href="#">rl15_ecoli</a> |
| P00579 | RPOD_ECOLI | * | P00579 | P0A7K6 | <a href="#">rpod_ecoli</a> | <a href="#">rl19_ecoli</a> |
| P00579 | RPOD_ECOLI | * | P00579 | P60422 | <a href="#">rpod_ecoli</a> | <a href="#">rl2_ecoli</a>  |
| P00579 | RPOD_ECOLI | * | P00579 | P0AG48 | <a href="#">rpod_ecoli</a> | <a href="#">rl21_ecoli</a> |
| P00579 | RPOD_ECOLI | * | P00579 | P61175 | <a href="#">rpod_ecoli</a> | <a href="#">rl22_ecoli</a> |
| P00579 | RPOD_ECOLI | * | P00579 | P0A7M2 | <a href="#">rpod_ecoli</a> | <a href="#">rl28_ecoli</a> |
| P00579 | RPOD_ECOLI | * | P00579 | P60723 | <a href="#">rpod_ecoli</a> | <a href="#">rl4_ecoli</a>  |
| P00579 | RPOD_ECOLI | * | P00579 | P60723 | <a href="#">rpod_ecoli</a> | <a href="#">rl4_ecoli</a>  |
| P00579 | RPOD_ECOLI | * | P00579 | P60723 | <a href="#">rpod_ecoli</a> | <a href="#">rl4_ecoli</a>  |
| P00579 | RPOD_ECOLI | * | P00579 | P62399 | <a href="#">rpod_ecoli</a> | <a href="#">rl5_ecoli</a>  |
| P00579 | RPOD_ECOLI | * | P00579 | P0A7K2 | <a href="#">rpod_ecoli</a> | <a href="#">rl7_ecoli</a>  |
| P00579 | RPOD_ECOLI | * | P00579 | P0A7Z4 | <a href="#">rpod_ecoli</a> | <a href="#">rpoa_ecoli</a> |
| P00579 | RPOD_ECOLI | * | P00579 | P0A7Z4 | <a href="#">rpod_ecoli</a> | <a href="#">rpoa_ecoli</a> |
| P00579 | RPOD_ECOLI | * | P00579 | P0A8V2 | <a href="#">rpod_ecoli</a> | <a href="#">rpob_ecoli</a> |
| P00579 | RPOD_ECOLI | * | P00579 | P0A8V2 | <a href="#">rpod_ecoli</a> | <a href="#">rpob_ecoli</a> |
| P00579 | RPOD_ECOLI | * | P00579 | P0A8V2 | <a href="#">rpod_ecoli</a> | <a href="#">rpob_ecoli</a> |
| P00579 | RPOD_ECOLI | * | P00579 | P0A8T7 | <a href="#">rpod_ecoli</a> | <a href="#">rpoc_ecoli</a> |
| P00579 | RPOD_ECOLI | * | P00579 | P0A8T7 | <a href="#">rpod_ecoli</a> | <a href="#">rpoc_ecoli</a> |
| P00579 | RPOD_ECOLI | * | P00579 | P0A8T7 | <a href="#">rpod_ecoli</a> | <a href="#">rpoc_ecoli</a> |
| P00579 | RPOD_ECOLI | * | P00579 | P0A8T7 | <a href="#">rpod_ecoli</a> | <a href="#">rpoc_ecoli</a> |
| P00579 | RPOD_ECOLI | * | P00579 | P0A800 | <a href="#">rpod_ecoli</a> | <a href="#">rpoz_ecoli</a> |
| P00579 | RPOD_ECOLI | * | P00579 | P0A800 | <a href="#">rpod_ecoli</a> | <a href="#">rpoz_ecoli</a> |
| P00579 | RPOD_ECOLI | * | P00579 | P0AG67 | <a href="#">rpod_ecoli</a> | <a href="#">rs1_ecoli</a>  |
| P00579 | RPOD_ECOLI | * | P00579 | P0A7V0 | <a href="#">rpod_ecoli</a> | <a href="#">rs2_ecoli</a>  |
| P00579 | RPOD_ECOLI | * | P00579 | P0A7V0 | <a href="#">rpod_ecoli</a> | <a href="#">rs2_ecoli</a>  |
| P00579 | RPOD_ECOLI | * | P00579 | P0A7V3 | <a href="#">rpod_ecoli</a> | <a href="#">rs3_ecoli</a>  |
| P00579 | RPOD_ECOLI | * | P00579 | P0A7V8 | <a href="#">rpod_ecoli</a> | <a href="#">rs4_ecoli</a>  |
| P00579 | RPOD_ECOLI | * | P00579 | P0A7W1 | <a href="#">rpod_ecoli</a> | <a href="#">rs5_ecoli</a>  |
| P00579 | RPOD_ECOLI | * | P00579 | P02358 | <a href="#">rpod_ecoli</a> | <a href="#">rs6_ecoli</a>  |
| P00579 | RPOD_ECOLI | * | P00579 | P02359 | <a href="#">rpod_ecoli</a> | <a href="#">rs7_ecoli</a>  |
| P00579 | RPOD_ECOLI | * | P00579 | P02359 | <a href="#">rpod_ecoli</a> | <a href="#">rs7_ecoli</a>  |
| P00579 | RPOD_ECOLI | * | P00579 | P0AFX4 | <a href="#">rpod_ecoli</a> | <a href="#">rsd_ecoli</a>  |
| P00579 | RPOD_ECOLI | * | P00579 | P0A8M6 | <a href="#">rpod_ecoli</a> | <a href="#">yeex_ecoli</a> |
| P00579 | RPOD_ECOLI | * | P00579 | P76464 | <a href="#">rpod_ecoli</a> | <a href="#">yfas_ecoli</a> |
| P00579 | RPOD_ECOLI | * | P00579 | P77247 | <a href="#">rpod_ecoli</a> | <a href="#">ynic_ecoli</a> |
| P0A776 | RPPH_ECOLI | * | P0A776 | P0A6F5 | <a href="#">rpph_ecoli</a> | <a href="#">ch60_ecoli</a> |



|        |            |   |        |        |            |            |
|--------|------------|---|--------|--------|------------|------------|
| POA776 | RPPH_ECOLI | * | POA776 | POA6K1 | rpph_ecoli | dapf_ecoli |
| POA776 | RPPH_ECOLI | * | POA776 | POA6K1 | rpph_ecoli | dapf_ecoli |
| POA776 | RPPH_ECOLI | * | POA776 | P0ACF0 | rpph_ecoli | dbha_ecoli |
| POA776 | RPPH_ECOLI | * | POA776 | POA9P6 | rpph_ecoli | dead_ecoli |
| POA776 | RPPH_ECOLI | * | POA776 | POA7L0 | rpph_ecoli | rl1_ecoli  |
| POA776 | RPPH_ECOLI | * | POA776 | POA7L0 | rpph_ecoli | rl1_ecoli  |
| POA776 | RPPH_ECOLI | * | POA776 | POA7J3 | rpph_ecoli | rl10_ecoli |
| POA776 | RPPH_ECOLI | * | POA776 | P0AA10 | rpph_ecoli | rl13_ecoli |
| POA776 | RPPH_ECOLI | * | POA776 | P0AA10 | rpph_ecoli | rl13_ecoli |
| POA776 | RPPH_ECOLI | * | POA776 | P0ADY3 | rpph_ecoli | rl14_ecoli |
| POA776 | RPPH_ECOLI | * | POA776 | P02413 | rpph_ecoli | rl15_ecoli |
| POA776 | RPPH_ECOLI | * | POA776 | P02413 | rpph_ecoli | rl15_ecoli |
| POA776 | RPPH_ECOLI | * | POA776 | P0ADY7 | rpph_ecoli | rl16_ecoli |
| POA776 | RPPH_ECOLI | * | POA776 | P0AG44 | rpph_ecoli | rl17_ecoli |
| POA776 | RPPH_ECOLI | * | POA776 | P0AG44 | rpph_ecoli | rl17_ecoli |
| POA776 | RPPH_ECOLI | * | POA776 | P0C018 | rpph_ecoli | rl18_ecoli |
| POA776 | RPPH_ECOLI | * | POA776 | P0C018 | rpph_ecoli | rl18_ecoli |
| POA776 | RPPH_ECOLI | * | POA776 | POA7K6 | rpph_ecoli | rl19_ecoli |
| POA776 | RPPH_ECOLI | * | POA776 | POA7K6 | rpph_ecoli | rl19_ecoli |
| POA776 | RPPH_ECOLI | * | POA776 | P60422 | rpph_ecoli | rl2_ecoli  |
| POA776 | RPPH_ECOLI | * | POA776 | P60422 | rpph_ecoli | rl2_ecoli  |
| POA776 | RPPH_ECOLI | * | POA776 | P60422 | rpph_ecoli | rl2_ecoli  |
| POA776 | RPPH_ECOLI | * | POA776 | POA7L3 | rpph_ecoli | rl20_ecoli |
| POA776 | RPPH_ECOLI | * | POA776 | P0AG48 | rpph_ecoli | rl21_ecoli |
| POA776 | RPPH_ECOLI | * | POA776 | P61175 | rpph_ecoli | rl22_ecoli |
| POA776 | RPPH_ECOLI | * | POA776 | P61175 | rpph_ecoli | rl22_ecoli |
| POA776 | RPPH_ECOLI | * | POA776 | P60624 | rpph_ecoli | rl24_ecoli |
| POA776 | RPPH_ECOLI | * | POA776 | P68919 | rpph_ecoli | rl25_ecoli |
| POA776 | RPPH_ECOLI | * | POA776 | POA7M2 | rpph_ecoli | rl28_ecoli |
| POA776 | RPPH_ECOLI | * | POA776 | P60438 | rpph_ecoli | rl3_ecoli  |
| POA776 | RPPH_ECOLI | * | POA776 | P60438 | rpph_ecoli | rl3_ecoli  |
| POA776 | RPPH_ECOLI | * | POA776 | P60438 | rpph_ecoli | rl3_ecoli  |
| POA776 | RPPH_ECOLI | * | POA776 | P60723 | rpph_ecoli | rl4_ecoli  |
| POA776 | RPPH_ECOLI | * | POA776 | P60723 | rpph_ecoli | rl4_ecoli  |
| POA776 | RPPH_ECOLI | * | POA776 | P62399 | rpph_ecoli | rl5_ecoli  |
| POA776 | RPPH_ECOLI | * | POA776 | P0AG55 | rpph_ecoli | rl6_ecoli  |
| POA776 | RPPH_ECOLI | * | POA776 | P0AG55 | rpph_ecoli | rl6_ecoli  |
| POA776 | RPPH_ECOLI | * | POA776 | POA7R1 | rpph_ecoli | rl9_ecoli  |
| POA776 | RPPH_ECOLI | * | POA776 | POA7R1 | rpph_ecoli | rl9_ecoli  |
| POA776 | RPPH_ECOLI | * | POA776 | P75864 | rpph_ecoli | rlml_ecoli |
| POA776 | RPPH_ECOLI | * | POA776 | P37765 | rpph_ecoli | rlub_ecoli |
| POA776 | RPPH_ECOLI | * | POA776 | P0AA39 | rpph_ecoli | rluc_ecoli |
| POA776 | RPPH_ECOLI | * | POA776 | P21499 | rpph_ecoli | rnrc_ecoli |
| POA776 | RPPH_ECOLI | * | POA776 | P0AG67 | rpph_ecoli | rs1_ecoli  |
| POA776 | RPPH_ECOLI | * | POA776 | P0AG67 | rpph_ecoli | rs1_ecoli  |



|        |            |   |        |        |            |            |
|--------|------------|---|--------|--------|------------|------------|
| POA776 | RPPH_ECOLI | * | POA776 | POA7S9 | rpph_ecoli | rs13_ecoli |
| POA776 | RPPH_ECOLI | * | POA776 | POA7S9 | rpph_ecoli | rs13_ecoli |
| POA776 | RPPH_ECOLI | * | POA776 | POA7T7 | rpph_ecoli | rs18_ecoli |
| POA776 | RPPH_ECOLI | * | POA776 | POA7U3 | rpph_ecoli | rs19_ecoli |
| POA776 | RPPH_ECOLI | * | POA776 | POA7V0 | rpph_ecoli | rs2_ecoli  |
| POA776 | RPPH_ECOLI | * | POA776 | POA7V0 | rpph_ecoli | rs2_ecoli  |
| POA776 | RPPH_ECOLI | * | POA776 | POA7U7 | rpph_ecoli | rs20_ecoli |
| POA776 | RPPH_ECOLI | * | POA776 | POA7V3 | rpph_ecoli | rs3_ecoli  |
| POA776 | RPPH_ECOLI | * | POA776 | POA7V8 | rpph_ecoli | rs4_ecoli  |
| POA776 | RPPH_ECOLI | * | POA776 | POA7V8 | rpph_ecoli | rs4_ecoli  |
| POA776 | RPPH_ECOLI | * | POA776 | POA7W1 | rpph_ecoli | rs5_ecoli  |
| POA776 | RPPH_ECOLI | * | POA776 | POA7W1 | rpph_ecoli | rs5_ecoli  |
| POA776 | RPPH_ECOLI | * | POA776 | P02358 | rpph_ecoli | rs6_ecoli  |
| POA776 | RPPH_ECOLI | * | POA776 | P02359 | rpph_ecoli | rs7_ecoli  |
| POA776 | RPPH_ECOLI | * | POA776 | P02359 | rpph_ecoli | rs7_ecoli  |
| POA776 | RPPH_ECOLI | * | POA776 | POA7X3 | rpph_ecoli | rs9_ecoli  |
| POA776 | RPPH_ECOLI | * | POA776 | P46850 | rpph_ecoli | rtcb_ecoli |
| POA776 | RPPH_ECOLI | * | POA776 | POA9K9 | rpph_ecoli | slyd_ecoli |
| POA776 | RPPH_ECOLI | * | POA776 | P0AG24 | rpph_ecoli | spot_ecoli |
| POA776 | RPPH_ECOLI | * | POA776 | P21507 | rpph_ecoli | srmc_ecoli |
| POA776 | RPPH_ECOLI | * | POA776 | P23841 | rpph_ecoli | xapr_ecoli |
| POA776 | RPPH_ECOLI | * | POA776 | POA8E7 | rpph_ecoli | yajq_ecoli |
| POA776 | RPPH_ECOLI | * | POA776 | P0ACM2 | rpph_ecoli | ydfh_ecoli |
| POA776 | RPPH_ECOLI | * | POA776 | P76154 | rpph_ecoli | ydfk_ecoli |
| POA776 | RPPH_ECOLI | * | POA776 | P0AGJ5 | rpph_ecoli | yfif_ecoli |
| POA776 | RPPH_ECOLI | * | POA776 | P0AGJ5 | rpph_ecoli | yfif_ecoli |
| POA776 | RPPH_ECOLI | * | POA776 | P76073 | rpph_ecoli | ynae_ecoli |
| POA8R0 | RRAA_ECOLI | * | POA8R0 | P35340 | rrea_ecoli | ahpf_ecoli |
| POA8R0 | RRAA_ECOLI | * | POA8R0 | P37028 | rrea_ecoli | btuf_ecoli |
| POA8R0 | RRAA_ECOLI | * | POA8R0 | POA6B7 | rrea_ecoli | iscs_ecoli |
| POA8R0 | RRAA_ECOLI | * | POA8R0 | P63386 | rrea_ecoli | mlaf_ecoli |
| POA8R0 | RRAA_ECOLI | * | POA8R0 | P33345 | rrea_ecoli | molr_ecoli |
| POA8R0 | RRAA_ECOLI | * | POA8R0 | P0AG44 | rrea_ecoli | rl17_ecoli |
| POA8R0 | RRAA_ECOLI | * | POA8R0 | P76403 | rrea_ecoli | yegq_ecoli |
| POA8R0 | RRAA_ECOLI | * | POA8R0 | P33343 | rrea_ecoli | yehd_ecoli |
| POA805 | RRF_ECOLI  | * | POA805 | P45568 | rrf_ecoli  | dxr_ecoli  |
| POA805 | RRF_ECOLI  | * | POA805 | P75905 | rrf_ecoli  | pgac_ecoli |
| POA805 | RRF_ECOLI  | * | POA805 | P77718 | rrf_ecoli  | thii_ecoli |
| POAG67 | RS1_ECOLI  | * | POAG67 | P36548 | rs1_ecoli  | amia_ecoli |
| POAG67 | RS1_ECOLI  | * | POAG67 | P77188 | rs1_ecoli  | matc_ecoli |
| POAG67 | RS1_ECOLI  | * | POAG67 | POA738 | rs1_ecoli  | moac_ecoli |
| POAG67 | RS1_ECOLI  | * | POAG67 | P76773 | rs1_ecoli  | ompl_ecoli |

|        |            |   |        |        |                            |                             |
|--------|------------|---|--------|--------|----------------------------|-----------------------------|
| P0AG67 | RS1_ECOLI  | * | P0AG67 | P0A9K9 | <a href="#">rs1_ecoli</a>  | <a href="#">slyd_ecoli</a>  |
| P0AG67 | RS1_ECOLI  | * | P0AG67 | P76512 | <a href="#">rs1_ecoli</a>  | <a href="#">yfdp_ecoli</a>  |
| P0A7R5 | RS10_ECOLI | * | P0A7R5 | P0A780 | <a href="#">rs10_ecoli</a> | <a href="#">nusb_ecoli</a>  |
| P0A7R5 | RS10_ECOLI | * | P0A7R5 | P0A780 | <a href="#">rs10_ecoli</a> | <a href="#">nusb_ecoli</a>  |
| P0A7R5 | RS10_ECOLI | * | P0A7R5 | P0A780 | <a href="#">rs10_ecoli</a> | <a href="#">nusb_ecoli</a>  |
| P0A7R9 | RS11_ECOLI |   | none   |        |                            |                             |
| P0A7S3 | RS12_ECOLI | * | P0A7S3 | P0A986 | <a href="#">rs12_ecoli</a> | <a href="#">cspi_ecoli</a>  |
| P0A7S3 | RS12_ECOLI | * | P0A7S3 | P0ACF8 | <a href="#">rs12_ecoli</a> | <a href="#">hns_ecoli</a>   |
| P0A7S3 | RS12_ECOLI | * | P0A7S3 | P0AB43 | <a href="#">rs12_ecoli</a> | <a href="#">ycgl_ecoli</a>  |
| P0A7S3 | RS12_ECOLI | * | P0A7S3 | P46125 | <a href="#">rs12_ecoli</a> | <a href="#">yedi_ecoli</a>  |
| P0A7S3 | RS12_ECOLI | * | P0A7S3 | P76321 | <a href="#">rs12_ecoli</a> | <a href="#">yedn_ecoli</a>  |
| P0A7S9 | RS13_ECOLI | * | P0A7S9 | P75989 | <a href="#">rs13_ecoli</a> | <a href="#">ycge_ecoli</a>  |
| P0AG59 | RS14_ECOLI | * | P0AG59 | P65643 | <a href="#">rs14_ecoli</a> | <a href="#">eutt_ecoli</a>  |
| P0AG59 | RS14_ECOLI | * | P0AG59 | P0C077 | <a href="#">rs14_ecoli</a> | <a href="#">rele_ecoli</a>  |
| P0AG59 | RS14_ECOLI | * | P0AG59 | P0AD53 | <a href="#">rs14_ecoli</a> | <a href="#">ygac_ecoli</a>  |
| P0AG59 | RS14_ECOLI | * | P0AG59 | P39295 | <a href="#">rs14_ecoli</a> | <a href="#">yjfm_ecoli</a>  |
| P0ADZ4 | RS15_ECOLI | * | P0ADZ4 | P36548 | <a href="#">rs15_ecoli</a> | <a href="#">amia_ecoli</a>  |
| P0ADZ4 | RS15_ECOLI | * | P0ADZ4 | P69228 | <a href="#">rs15_ecoli</a> | <a href="#">baer_ecoli</a>  |
| P0ADZ4 | RS15_ECOLI | * | P0ADZ4 | P33345 | <a href="#">rs15_ecoli</a> | <a href="#">molr_ecoli</a>  |
| P0ADZ4 | RS15_ECOLI | * | P0ADZ4 | P18843 | <a href="#">rs15_ecoli</a> | <a href="#">nade_ecoli</a>  |
| P0ADZ4 | RS15_ECOLI | * | P0ADZ4 | P39306 | <a href="#">rs15_ecoli</a> | <a href="#">ulaf_ecoli</a>  |
| P0ADZ4 | RS15_ECOLI | * | P0ADZ4 | P75989 | <a href="#">rs15_ecoli</a> | <a href="#">ycge_ecoli</a>  |
| P0A7T3 | RS16_ECOLI | * | P0A7T3 | P06611 | <a href="#">rs16_ecoli</a> | <a href="#">btud_ecoli</a>  |
| P0A7T3 | RS16_ECOLI | * | P0A7T3 | P0A6Y8 | <a href="#">rs16_ecoli</a> | <a href="#">dnak_ecoli</a>  |
| P0A7T3 | RS16_ECOLI | * | P0A7T3 | P77188 | <a href="#">rs16_ecoli</a> | <a href="#">matc_ecoli</a>  |
| P0A7T3 | RS16_ECOLI | * | P0A7T3 | P18843 | <a href="#">rs16_ecoli</a> | <a href="#">nade_ecoli</a>  |
| P0AG63 | RS17_ECOLI |   | none   |        |                            |                             |
| P0A7T7 | RS18_ECOLI | * | P0A7T7 | Q47157 | <a href="#">rs18_ecoli</a> | <a href="#">yafo_ecoli</a>  |
| P0A7T7 | RS18_ECOLI | * | P0A7T7 | P08245 | <a href="#">rs18_ecoli</a> | <a href="#">ycih_ecoli</a>  |
| P0A7U3 | RS19_ECOLI | * | P0A7U3 | P0ABZ1 | <a href="#">rs19_ecoli</a> | <a href="#">flig_ecoli</a>  |
| P0A7U3 | RS19_ECOLI | * | P0A7U3 | P32662 | <a href="#">rs19_ecoli</a> | <a href="#">gph_ecoli</a>   |
| P0A7U3 | RS19_ECOLI | * | P0A7U3 | P0AGB6 | <a href="#">rs19_ecoli</a> | <a href="#">rpoe_ecoli</a>  |
| P0A7V0 | RS2_ECOLI  | * | P0A7V0 | P0AC41 | <a href="#">rs2_ecoli</a>  | <a href="#">dhsa_ecoli</a>  |
| P0A7V0 | RS2_ECOLI  | * | P0A7V0 | P0A6Z3 | <a href="#">rs2_ecoli</a>  | <a href="#">httpg_ecoli</a> |

|        |            |   |        |        |            |            |
|--------|------------|---|--------|--------|------------|------------|
| POA7V0 | RS2_ECOLI  | * | POA7V0 | P15977 | rs2_ecoli  | malq_ecoli |
| POA7U7 | RS20_ECOLI |   | none   |        |            |            |
| P68679 | RS21_ECOLI |   | none   |        |            |            |
| POA7V3 | RS3_ECOLI  | * | POA7V3 | P76073 | rs3_ecoli  | ynae_ecoli |
| POA7V8 | RS4_ECOLI  | * | POA7V8 | P23882 | rs4_ecoli  | fmt_ecoli  |
| POA7V8 | RS4_ECOLI  | * | POA7V8 | P0AFG0 | rs4_ecoli  | nusg_ecoli |
| POA7V8 | RS4_ECOLI  | * | POA7V8 | P0A8I8 | rs4_ecoli  | rlmh_ecoli |
| POA7V8 | RS4_ECOLI  | * | POA7V8 | P75869 | rs4_ecoli  | sxy_ecoli  |
| POA7V8 | RS4_ECOLI  | * | POA7V8 | Q47157 | rs4_ecoli  | yafo_ecoli |
| POA7V8 | RS4_ECOLI  | * | POA7V8 | P30176 | rs4_ecoli  | ybia_ecoli |
| POA7V8 | RS4_ECOLI  | * | POA7V8 | P75989 | rs4_ecoli  | ycge_ecoli |
| POA7V8 | RS4_ECOLI  | * | POA7V8 | P76154 | rs4_ecoli  | ydfk_ecoli |
| POA7V8 | RS4_ECOLI  | * | POA7V8 | P64574 | rs4_ecoli  | yghw_ecoli |
| POA7V8 | RS4_ECOLI  | * | POA7V8 | P76073 | rs4_ecoli  | ynae_ecoli |
| POA7W1 | RS5_ECOLI  | * | POA7W1 | P0AES4 | rs5_ecoli  | gyra_ecoli |
| POA7W1 | RS5_ECOLI  | * | POA7W1 | P0AES6 | rs5_ecoli  | gyrb_ecoli |
| POA7W1 | RS5_ECOLI  | * | POA7W1 | P38489 | rs5_ecoli  | nfnb_ecoli |
| POA7W1 | RS5_ECOLI  | * | POA7W1 | P0A8D0 | rs5_ecoli  | nrdr_ecoli |
| POA7W1 | RS5_ECOLI  | * | POA7W1 | P0C0U4 | rs5_ecoli  | rimk_ecoli |
| POA7W1 | RS5_ECOLI  | * | POA7W1 | P76154 | rs5_ecoli  | ydfk_ecoli |
| POA7W1 | RS5_ECOLI  | * | POA7W1 | P76073 | rs5_ecoli  | ynae_ecoli |
| POA7W1 | RS5_ECOLI  | * | POA7W1 | P33368 | rs5_ecoli  | yohf_ecoli |
| P02358 | RS6_ECOLI  | * | P02358 | P0A6Y8 | rs6_ecoli  | dnak_ecoli |
| P02358 | RS6_ECOLI  | * | P02358 | P0A6U3 | rs6_ecoli  | mnmg_ecoli |
| P02358 | RS6_ECOLI  | * | P02358 | P0A8M3 | rs6_ecoli  | syt_ecoli  |
| P02358 | RS6_ECOLI  | * | P02358 | P69820 | rs6_ecoli  | ulac_ecoli |
| P02358 | RS6_ECOLI  | * | P02358 | P0A8M6 | rs6_ecoli  | yeex_ecoli |
| P02358 | RS6_ECOLI  | * | P02358 | P33644 | rs6_ecoli  | yfih_ecoli |
| P02359 | RS7_ECOLI  | * | P02359 | P0A850 | rs7_ecoli  | tig_ecoli  |
| POA7W7 | RS8_ECOLI  | * | POA7W7 | P0A8I8 | rs8_ecoli  | rlmh_ecoli |
| POA7W7 | RS8_ECOLI  | * | POA7W7 | P09184 | rs8_ecoli  | vsr_ecoli  |
| POA7X3 | RS9_ECOLI  | * | POA7X3 | P0A8I8 | rs9_ecoli  | rlmh_ecoli |
| POA7X3 | RS9_ECOLI  | * | POA7X3 | P08245 | rs9_ecoli  | ycih_ecoli |
| POA7X3 | RS9_ECOLI  | * | POA7X3 | P64574 | rs9_ecoli  | yghw_ecoli |
| P06992 | RSMA_ECOLI | * | P06992 | P0A6F5 | rsma_ecoli | ch60_ecoli |

|        |            |      |        |        |            |             |
|--------|------------|------|--------|--------|------------|-------------|
| P06992 | RSMA_ECOLI | *    | P06992 | P04079 | rsma_ecoli | guaa_ecoli  |
| P06992 | RSMA_ECOLI | *    | P06992 | P08373 | rsma_ecoli | murb_ecoli  |
| P36929 | RSMB_ECOLI | *    | P36929 | P16682 | rsmb_ecoli | phnd_ecoli  |
| P36929 | RSMB_ECOLI | *    | P36929 | P0AG44 | rsmb_ecoli | rl17_ecoli  |
| P36929 | RSMB_ECOLI | *    | P36929 | P60422 | rsmb_ecoli | rl2_ecoli   |
| P36929 | RSMB_ECOLI | *    | P36929 | P60438 | rsmb_ecoli | rl3_ecoli   |
| P36929 | RSMB_ECOLI | *    | P36929 | P60723 | rsmb_ecoli | rl4_ecoli   |
| P36929 | RSMB_ECOLI | *    | P36929 | P0A7V8 | rsmb_ecoli | rs4_ecoli   |
| P36929 | RSMB_ECOLI | *    | P36929 | P02359 | rsmb_ecoli | rs7_ecoli   |
| P36929 | RSMB_ECOLI | *    | P36929 | P0A7X3 | rsmb_ecoli | rs9_ecoli   |
| P36929 | RSMB_ECOLI | *    | P36929 | P06612 | rsmb_ecoli | top1_ecoli  |
| P36929 | RSMB_ECOLI | *    | P36929 | P76154 | rsmb_ecoli | ydfk_ecoli  |
| P36929 | RSMB_ECOLI | *    | P36929 | P75804 | rsmb_ecoli | ylil_ecoli  |
| P36929 | RSMB_ECOLI | *    | P36929 | P76073 | rsmb_ecoli | ynae_ecoli  |
| P39406 | RSMC_ECOLI | *    | P39406 | P0ACD8 | rsmc_ecoli | mbhl_ecoli  |
| P39406 | RSMC_ECOLI | *    | P39406 | P18843 | rsmc_ecoli | nade_ecoli  |
| P39406 | RSMC_ECOLI | *    | P39406 | P60422 | rsmc_ecoli | rl2_ecoli   |
| P39406 | RSMC_ECOLI | *    | P39406 | P60723 | rsmc_ecoli | rl4_ecoli   |
| P39406 | RSMC_ECOLI | *    | P39406 | P0A7S9 | rsmc_ecoli | rs13_ecoli  |
| P39406 | RSMC_ECOLI | *    | P39406 | P0A7V3 | rsmc_ecoli | rs3_ecoli   |
| P39406 | RSMC_ECOLI | *    | P39406 | P0A7V8 | rsmc_ecoli | rs4_ecoli   |
| P39406 | RSMC_ECOLI | *    | P39406 | P02359 | rsmc_ecoli | rs7_ecoli   |
| P39406 | RSMC_ECOLI | *    | P39406 | P0A7X3 | rsmc_ecoli | rs9_ecoli   |
| P39406 | RSMC_ECOLI | *    | P39406 | P0A8F4 | rsmc_ecoli | urk_ecoli   |
| P39406 | RSMC_ECOLI | *    | P39406 | P75989 | rsmc_ecoli | ycge_ecoli  |
| P39406 | RSMC_ECOLI | *    | P39406 | P08245 | rsmc_ecoli | ycih_ecoli  |
| P0ADX9 | RSMD_ECOLI | *    | P0ADX9 | P0A6Y8 | rsmd_ecoli | dnak_ecoli  |
| P0ADX9 | RSMD_ECOLI | *    | P0ADX9 | P0CE47 | rsmd_ecoli | eftu1_ecoli |
| P0ADX9 | RSMD_ECOLI | *    | P0ADX9 | P0ACL7 | rsmd_ecoli | lldr_ecoli  |
| P0ADX9 | RSMD_ECOLI | *    | P0ADX9 | P0A915 | rsmd_ecoli | ompw_ecoli  |
| P0ADX9 | RSMD_ECOLI | *    | P0ADX9 | P60422 | rsmd_ecoli | rl2_ecoli   |
| P0AGL7 | RSME_ECOLI | *    | P0AGL7 | P0AG44 | rsme_ecoli | rl17_ecoli  |
| P0AGL7 | RSME_ECOLI | *    | P0AGL7 | P0A7V8 | rsme_ecoli | rs4_ecoli   |
| P0AGL7 | RSME_ECOLI | *    | P0AGL7 | P0A9K9 | rsme_ecoli | slyd_ecoli  |
| P0AGL7 | RSME_ECOLI | *    | P0AGL7 | P75792 | rsme_ecoli | suph_ecoli  |
| P76273 | RSMF_ECOLI | none |        |        |            |             |
| P60390 | RSMH_ECOLI | *    | P60390 | P0A717 | rsmh_ecoli | kprs_ecoli  |
| P60390 | RSMH_ECOLI | *    | P60390 | P60438 | rsmh_ecoli | rl3_ecoli   |
| P60390 | RSMH_ECOLI | *    | P60390 | P0A7K2 | rsmh_ecoli | rl7_ecoli   |

|        |            |          |        |            |            |
|--------|------------|----------|--------|------------|------------|
| P60390 | RSMH_ECOLI | * P60390 | P0A7R5 | rsmh_ecoli | rs10_ecoli |
| P67087 | RSMI_ECOLI | * P67087 | P06959 | rsmi_ecoli | odp2_ecoli |
| P67087 | RSMI_ECOLI | * P67087 | P0A7V8 | rsmi_ecoli | rs4_ecoli  |
| P67087 | RSMI_ECOLI | * P67087 | P45545 | rsmi_ecoli | yhfs_ecoli |
| P52108 | RSTA_ECOLI | * P52108 | P0A6F5 | rsta_ecoli | ch60_ecoli |
| P52108 | RSTA_ECOLI | * P52108 | P0AC55 | rsta_ecoli | glnk_ecoli |
| P52108 | RSTA_ECOLI | * P52108 | P31658 | rsta_ecoli | hcha_ecoli |
| P52108 | RSTA_ECOLI | * P52108 | P0A717 | rsta_ecoli | kprs_ecoli |
| P52108 | RSTA_ECOLI | * P52108 | P36999 | rsta_ecoli | rlma_ecoli |
| P52108 | RSTA_ECOLI | * P52108 | P39177 | rsta_ecoli | uspg_ecoli |
| P52108 | RSTA_ECOLI | * P52108 | P0AD35 | rsta_ecoli | yfdo_ecoli |
| P52108 | RSTA_ECOLI | * P52108 | P36677 | rsta_ecoli | yhdn_ecoli |
| P52108 | RSTA_ECOLI | * P52108 | P75977 | rsta_ecoli | ymfm_ecoli |
| P0AA43 | RSUA_ECOLI | * P0AA43 | P30128 | rsua_ecoli | greb_ecoli |
| P0AA43 | RSUA_ECOLI | * P0AA43 | P0A7R5 | rsua_ecoli | rs10_ecoli |
| P0AA43 | RSUA_ECOLI | * P0AA43 | P0A7R5 | rsua_ecoli | rs10_ecoli |
| P0AA43 | RSUA_ECOLI | * P0AA43 | P0A7S9 | rsua_ecoli | rs13_ecoli |
| P0AA43 | RSUA_ECOLI | * P0AA43 | P0A7T3 | rsua_ecoli | rs16_ecoli |
| P0AA43 | RSUA_ECOLI | * P0AA43 | P0A7V0 | rsua_ecoli | rs2_ecoli  |
| P0AA43 | RSUA_ECOLI | * P0AA43 | P0A7V8 | rsua_ecoli | rs4_ecoli  |
| P0AA43 | RSUA_ECOLI | * P0AA43 | P0A7X3 | rsua_ecoli | rs9_ecoli  |
| P0AA43 | RSUA_ECOLI | * P0AA43 | P0A8R7 | rsua_ecoli | ycjf_ecoli |
| P0AA43 | RSUA_ECOLI | * P0AA43 | P65807 | rsua_ecoli | ygey_ecoli |
| P55135 | RUMA_ECOLI | none     |        |            |            |
| P75817 | RUMB_ECOLI | * P75817 | P05052 | rumb_ecoli | appy_ecoli |
| P75817 | RUMB_ECOLI | * P75817 | P0A6F5 | rumb_ecoli | ch60_ecoli |
| P75817 | RUMB_ECOLI | * P75817 | P18843 | rumb_ecoli | nade_ecoli |
| P75817 | RUMB_ECOLI | * P75817 | P09377 | rumb_ecoli | rhas_ecoli |
| P75817 | RUMB_ECOLI | * P75817 | P0A7L0 | rumb_ecoli | rl1_ecoli  |
| P75817 | RUMB_ECOLI | * P75817 | P60422 | rumb_ecoli | rl2_ecoli  |
| P75817 | RUMB_ECOLI | * P75817 | P08245 | rumb_ecoli | ycih_ecoli |
| P0A809 | RUVA_ECOLI | * P0A809 | P24251 | ruva_ecoli | crl_ecoli  |
| P0A809 | RUVA_ECOLI | * P0A809 | P18843 | ruva_ecoli | nade_ecoli |
| P0A809 | RUVA_ECOLI | * P0A809 | P0ADZ0 | ruva_ecoli | rl23_ecoli |
| P0A809 | RUVA_ECOLI | * P0A809 | P68398 | ruva_ecoli | tada_ecoli |
| P0A809 | RUVA_ECOLI | * P0A809 | P0A843 | ruva_ecoli | tate_ecoli |
| P0AAH4 | SAPD_ECOLI | * P0AAH4 | P0A6F5 | sapd_ecoli | ch60_ecoli |
| P0AAH4 | SAPD_ECOLI | * P0AAH4 | P77779 | sapd_ecoli | ybfo_ecoli |

|        |            |   |        |        |            |              |
|--------|------------|---|--------|--------|------------|--------------|
| P16095 | SDHL_ECOLI | * | P16095 | P0AC53 | sdhl_ecoli | g6pd_ecoli   |
| P16095 | SDHL_ECOLI | * | P16095 | P77243 | sdhl_ecoli | prpd_ecoli   |
| P16095 | SDHL_ECOLI | * | P16095 | P77649 | sdhl_ecoli | ydiu_ecoli   |
| P30744 | SDHM_ECOLI | * | P30744 | P0A901 | sdhm_ecoli | bhc_ecoli    |
| P10408 | SECA_ECOLI | * | P10408 | P31119 | seca_ecoli | aas_ecoli    |
| P10408 | SECA_ECOLI | * | P10408 | P12996 | seca_ecoli | biob_ecoli   |
| P10408 | SECA_ECOLI | * | P10408 | P0A6Y8 | seca_ecoli | dnak_ecoli   |
| P10408 | SECA_ECOLI | * | P10408 | P0CE47 | seca_ecoli | eftu1_ecoli  |
| P10408 | SECA_ECOLI | * | P10408 | P0CE47 | seca_ecoli | eftu1_ecoli  |
| P10408 | SECA_ECOLI | * | P10408 | P0C8J8 | seca_ecoli | gatz_ecoli   |
| P10408 | SECA_ECOLI | * | P10408 | P0A707 | seca_ecoli | if3_ecoli    |
| P10408 | SECA_ECOLI | * | P10408 | P0A817 | seca_ecoli | metk_ecoli   |
| P10408 | SECA_ECOLI | * | P10408 | P0AEZ3 | seca_ecoli | mind_ecoli   |
| P10408 | SECA_ECOLI | * | P10408 | P09348 | seca_ecoli | mota_ecoli   |
| P10408 | SECA_ECOLI | * | P10408 | P0A9X4 | seca_ecoli | mreb_ecoli   |
| P10408 | SECA_ECOLI | * | P10408 | Q46877 | seca_ecoli | norv_ecoli   |
| P10408 | SECA_ECOLI | * | P10408 | Q9F560 | seca_ecoli | q9f560_ecolx |
| P10408 | SECA_ECOLI | * | P10408 | P0AG30 | seca_ecoli | rho_ecoli    |
| P10408 | SECA_ECOLI | * | P10408 | P0A7J7 | seca_ecoli | rl11_ecoli   |
| P10408 | SECA_ECOLI | * | P10408 | P61175 | seca_ecoli | rl22_ecoli   |
| P10408 | SECA_ECOLI | * | P10408 | P60723 | seca_ecoli | rl4_ecoli    |
| P10408 | SECA_ECOLI | * | P10408 | P0A7K2 | seca_ecoli | rl7_ecoli    |
| P10408 | SECA_ECOLI | * | P10408 | P0A7V0 | seca_ecoli | rs2_ecoli    |
| P10408 | SECA_ECOLI | * | P10408 | P10408 | seca_ecoli | seca_ecoli   |
| P10408 | SECA_ECOLI | * | P10408 | P0AG86 | seca_ecoli | secb_ecoli   |
| P10408 | SECA_ECOLI | * | P10408 | P0AG86 | seca_ecoli | secb_ecoli   |
| P10408 | SECA_ECOLI | * | P10408 | P0AGA2 | seca_ecoli | secy_ecoli   |
| P10408 | SECA_ECOLI | * | P10408 | P75791 | seca_ecoli | ybiu_ecoli   |
| P10408 | SECA_ECOLI | * | P10408 | P75838 | seca_ecoli | ycao_ecoli   |
| P10408 | SECA_ECOLI | * | P10408 | P77804 | seca_ecoli | ydga_ecoli   |
| P10408 | SECA_ECOLI | * | P10408 | P39396 | seca_ecoli | yjiy_ecoli   |
| P0AG86 | SECB_ECOLI | * | P0AG86 | P0AE88 | secb_ecoli | cpxr_ecoli   |
| P0AG86 | SECB_ECOLI | * | P0AG86 | P0A9M0 | secb_ecoli | lon_ecoli    |
| P0AG86 | SECB_ECOLI | * | P0AG86 | P0A9M0 | secb_ecoli | lon_ecoli    |
| P0AG86 | SECB_ECOLI | * | P0AG86 | P0AF06 | secb_ecoli | motb_ecoli   |
| P0AG86 | SECB_ECOLI | * | P0AG86 | P0A772 | secb_ecoli | nrdi_ecoli   |
| P0AG86 | SECB_ECOLI | * | P0AG86 | P75697 | secb_ecoli | p75698_ecoli |
| P0AG86 | SECB_ECOLI | * | P0AG86 | P0A7V3 | secb_ecoli | rs3_ecoli    |
| P0AG86 | SECB_ECOLI | * | P0AG86 | P10408 | secb_ecoli | seca_ecoli   |
| P0AG86 | SECB_ECOLI | * | P0AG86 | P75745 | secb_ecoli | ybgk_ecoli   |



|        |            |   |        |        |            |            |
|--------|------------|---|--------|--------|------------|------------|
| P14081 | SELB_ECOLI | * | P14081 | P08622 | selb_ecoli | dnaj_ecoli |
| P14081 | SELB_ECOLI | * | P14081 | P08622 | selb_ecoli | dnaj_ecoli |
| P14081 | SELB_ECOLI | * | P14081 | P0AFG8 | selb_ecoli | odp1_ecoli |
| P14081 | SELB_ECOLI | * | P14081 | P06959 | selb_ecoli | odp2_ecoli |
| P14081 | SELB_ECOLI | * | P14081 | P76773 | selb_ecoli | ompl_ecoli |
| P14081 | SELB_ECOLI | * | P14081 | P0A9M8 | selb_ecoli | pta_ecoli  |
| P14081 | SELB_ECOLI | * | P14081 | P0AG30 | selb_ecoli | rho_ecoli  |
| P14081 | SELB_ECOLI | * | P14081 | P0A7L0 | selb_ecoli | rl1_ecoli  |
| P14081 | SELB_ECOLI | * | P14081 | P0AA10 | selb_ecoli | rl13_ecoli |
| P14081 | SELB_ECOLI | * | P14081 | P02413 | selb_ecoli | rl15_ecoli |
| P14081 | SELB_ECOLI | * | P14081 | P0AG44 | selb_ecoli | rl17_ecoli |
| P14081 | SELB_ECOLI | * | P14081 | P0A7K6 | selb_ecoli | rl19_ecoli |
| P14081 | SELB_ECOLI | * | P14081 | P60422 | selb_ecoli | rl2_ecoli  |
| P14081 | SELB_ECOLI | * | P14081 | P60422 | selb_ecoli | rl2_ecoli  |
| P14081 | SELB_ECOLI | * | P14081 | P0A7L3 | selb_ecoli | rl20_ecoli |
| P14081 | SELB_ECOLI | * | P14081 | P0AG48 | selb_ecoli | rl21_ecoli |
| P14081 | SELB_ECOLI | * | P14081 | P61175 | selb_ecoli | rl22_ecoli |
| P14081 | SELB_ECOLI | * | P14081 | P60624 | selb_ecoli | rl24_ecoli |
| P14081 | SELB_ECOLI | * | P14081 | P68919 | selb_ecoli | rl25_ecoli |
| P14081 | SELB_ECOLI | * | P14081 | P0A7M2 | selb_ecoli | rl28_ecoli |
| P14081 | SELB_ECOLI | * | P14081 | P60438 | selb_ecoli | rl3_ecoli  |
| P14081 | SELB_ECOLI | * | P14081 | P60438 | selb_ecoli | rl3_ecoli  |
| P14081 | SELB_ECOLI | * | P14081 | P60723 | selb_ecoli | rl4_ecoli  |
| P14081 | SELB_ECOLI | * | P14081 | P0A7K2 | selb_ecoli | rl7_ecoli  |
| P14081 | SELB_ECOLI | * | P14081 | P0A7R1 | selb_ecoli | rl9_ecoli  |
| P14081 | SELB_ECOLI | * | P14081 | P37765 | selb_ecoli | rlub_ecoli |
| P14081 | SELB_ECOLI | * | P14081 | P21499 | selb_ecoli | rnr_ecoli  |
| P14081 | SELB_ECOLI | * | P14081 | P0AG67 | selb_ecoli | rs1_ecoli  |
| P14081 | SELB_ECOLI | * | P14081 | P0A7U7 | selb_ecoli | rs20_ecoli |
| P14081 | SELB_ECOLI | * | P14081 | P0A7V3 | selb_ecoli | rs3_ecoli  |
| P14081 | SELB_ECOLI | * | P14081 | P0A7V8 | selb_ecoli | rs4_ecoli  |
| P14081 | SELB_ECOLI | * | P14081 | P0A7V8 | selb_ecoli | rs4_ecoli  |
| P14081 | SELB_ECOLI | * | P14081 | P0A7W1 | selb_ecoli | rs5_ecoli  |
| P14081 | SELB_ECOLI | * | P14081 | P02358 | selb_ecoli | rs6_ecoli  |
| P14081 | SELB_ECOLI | * | P14081 | P02359 | selb_ecoli | rs7_ecoli  |
| P14081 | SELB_ECOLI | * | P14081 | P0A7X3 | selb_ecoli | rs9_ecoli  |
| P14081 | SELB_ECOLI | * | P14081 | P21507 | selb_ecoli | srmb_ecoli |
| P14081 | SELB_ECOLI | * | P14081 | P21507 | selb_ecoli | srmb_ecoli |
| P14081 | SELB_ECOLI | * | P14081 | P0AGJ5 | selb_ecoli | yfif_ecoli |
| P14081 | SELB_ECOLI | * | P14081 | P0AGJ5 | selb_ecoli | yfif_ecoli |
| P16456 | SELD_ECOLI | * | P16456 | P12999 | seld_ecoli | bioc_ecoli |
| P16456 | SELD_ECOLI | * | P16456 | P30015 | seld_ecoli | lhr_ecoli  |
| P16456 | SELD_ECOLI | * | P16456 | P22523 | seld_ecoli | mukb_ecoli |
| P16456 | SELD_ECOLI | * | P16456 | P18843 | seld_ecoli | nade_ecoli |

|        |            |      |        |        |            |            |
|--------|------------|------|--------|--------|------------|------------|
| P16456 | SELD_ECOLI | *    | P16456 | P60422 | seld_ecoli | rl2_ecoli  |
| P16456 | SELD_ECOLI | *    | P16456 | P0A8T7 | seld_ecoli | rpoc_ecoli |
| P16456 | SELD_ECOLI | *    | P16456 | P0A7X3 | seld_ecoli | rs9_ecoli  |
| P16456 | SELD_ECOLI | *    | P16456 | P28722 | seld_ecoli | yhca_ecoli |
| P0AFY8 | SEQA_ECOLI | *    | P0AFY8 | P04152 | seqa_ecoli | umuc_ecoli |
| P0AGB0 | SERB_ECOLI | *    | P0AGB0 | P18843 | serb_ecoli | nade_ecoli |
| P23721 | SERC_ECOLI | none |        |        |            |            |
| P77468 | SFMD_ECOLI | none |        |        |            |            |
| P33595 | SGRR_ECOLI | *    | P33595 | P0A6F5 | sgrr_ecoli | ch60_ecoli |
| P33595 | SGRR_ECOLI | *    | P33595 | P14407 | sgrr_ecoli | fumb_ecoli |
| P0AEU7 | SKP_ECOLI  | *    | P0AEU7 | P0AA10 | skp_ecoli  | rl13_ecoli |
| P0AEU7 | SKP_ECOLI  | *    | P0AEU7 | P02413 | skp_ecoli  | rl15_ecoli |
| P0AEU7 | SKP_ECOLI  | *    | P0AEU7 | P0A7K6 | skp_ecoli  | rl19_ecoli |
| P0AEU7 | SKP_ECOLI  | *    | P0AEU7 | P0AG48 | skp_ecoli  | rl21_ecoli |
| P0AEU7 | SKP_ECOLI  | *    | P0AEU7 | P61175 | skp_ecoli  | rl22_ecoli |
| P0AEU7 | SKP_ECOLI  | *    | P0AEU7 | P60624 | skp_ecoli  | rl24_ecoli |
| P0AEU7 | SKP_ECOLI  | *    | P0AEU7 | P62399 | skp_ecoli  | rl5_ecoli  |
| P0AEU7 | SKP_ECOLI  | *    | P0AEU7 | P0A7R1 | skp_ecoli  | rl9_ecoli  |
| P0AEU7 | SKP_ECOLI  | *    | P0AEU7 | P21499 | skp_ecoli  | rnr_ecoli  |
| P0AEU7 | SKP_ECOLI  | *    | P0AEU7 | P0A7S9 | skp_ecoli  | rs13_ecoli |
| P0AEU7 | SKP_ECOLI  | *    | P0AEU7 | P0AG24 | skp_ecoli  | spot_ecoli |
| P0AEU7 | SKP_ECOLI  | *    | P0AEU7 | P00961 | skp_ecoli  | sygb_ecoli |
| P0AEU7 | SKP_ECOLI  | *    | P0AEU7 | P60906 | skp_ecoli  | syh_ecoli  |
| P0C093 | SLMA_ECOLI | none |        |        |            |            |
| P37194 | SLP_ECOLI  | *    | P37194 | P37194 | slp_ecoli  | slp_ecoli  |
| P0A8W2 | SLYA_ECOLI | none |        |        |            |            |
| P0A905 | SLYB_ECOLI | none |        |        |            |            |
| P0A9K9 | SLYD_ECOLI | *    | P0A9K9 | P17444 | slyd_ecoli | beta_ecoli |
| P0A9K9 | SLYD_ECOLI | *    | P0A9K9 | P0ACF0 | slyd_ecoli | dbha_ecoli |
| P0A9K9 | SLYD_ECOLI | *    | P0A9K9 | P0ACF4 | slyd_ecoli | dbhb_ecoli |
| P0A9K9 | SLYD_ECOLI | *    | P0A9K9 | P04949 | slyd_ecoli | flic_ecoli |
| P0A9K9 | SLYD_ECOLI | *    | P0A9K9 | P0AAG3 | slyd_ecoli | gltl_ecoli |
| P0A9K9 | SLYD_ECOLI | *    | P0A9K9 | P68066 | slyd_ecoli | grca_ecoli |
| P0A9K9 | SLYD_ECOLI | *    | P0A9K9 | P0AAN3 | slyd_ecoli | hypb_ecoli |

|        |            |      |        |        |            |             |
|--------|------------|------|--------|--------|------------|-------------|
| P0A9K9 | SLYD_ECOLI | *    | P0A9K9 | P0AAN3 | slyd_ecoli | hypb_ecoli  |
| P0A9K9 | SLYD_ECOLI | *    | P0A9K9 | P19767 | slyd_ecoli | insa7_ecoli |
| P0A9K9 | SLYD_ECOLI | *    | P0A9K9 | P03023 | slyd_ecoli | laci_ecoli  |
| P0A9K9 | SLYD_ECOLI | *    | P0A9K9 | P43337 | slyd_ecoli | nudl_ecoli  |
| P0A9K9 | SLYD_ECOLI | *    | P0A9K9 | P0AFG0 | slyd_ecoli | nusg_ecoli  |
| P0A9K9 | SLYD_ECOLI | *    | P0A9K9 | P0ADY3 | slyd_ecoli | rl14_ecoli  |
| P0A9K9 | SLYD_ECOLI | *    | P0A9K9 | P02413 | slyd_ecoli | rl15_ecoli  |
| P0A9K9 | SLYD_ECOLI | *    | P0A9K9 | P0ADZ0 | slyd_ecoli | rl23_ecoli  |
| P0A9K9 | SLYD_ECOLI | *    | P0A9K9 | P0A7L8 | slyd_ecoli | rl27_ecoli  |
| P0A9K9 | SLYD_ECOLI | *    | P0A9K9 | P62399 | slyd_ecoli | rl5_ecoli   |
| P0A9K9 | SLYD_ECOLI | *    | P0A9K9 | P0AG55 | slyd_ecoli | rl6_ecoli   |
| P0A9K9 | SLYD_ECOLI | *    | P0A9K9 | P0A7V8 | slyd_ecoli | rs4_ecoli   |
| P0A9K9 | SLYD_ECOLI | *    | P0A9K9 | P0A7W1 | slyd_ecoli | rs5_ecoli   |
| P0A9K9 | SLYD_ECOLI | *    | P0A9K9 | P0A7X3 | slyd_ecoli | rs9_ecoli   |
| P0A9K9 | SLYD_ECOLI | *    | P0A9K9 | P0AAH4 | slyd_ecoli | sapd_ecoli  |
| P0A9K9 | SLYD_ECOLI | *    | P0A9K9 | P0A8L1 | slyd_ecoli | sys_ecoli   |
| P0A9K9 | SLYD_ECOLI | *    | P0A9K9 | P39306 | slyd_ecoli | ulaf_ecoli  |
| P0A9K9 | SLYD_ECOLI | *    | P0A9K9 | P75988 | slyd_ecoli | ycgx_ecoli  |
| P0A9K9 | SLYD_ECOLI | *    | P0A9K9 | P31130 | slyd_ecoli | ydei_ecoli  |
| P0A9K9 | SLYD_ECOLI | *    | P0A9K9 | P45769 | slyd_ecoli | yhdz_ecoli  |
| P0A9K9 | SLYD_ECOLI | *    | P0A9K9 | P37655 | slyd_ecoli | yhqj_ecoli  |
|        |            |      |        |        |            |             |
| P0AGD3 | SODF_ECOLI | *    | P0AGD3 | P0ACZ4 | sodf_ecoli | evga_ecoli  |
| P0AGD3 | SODF_ECOLI | *    | P0AGD3 | P0A912 | sodf_ecoli | pal_ecoli   |
| P0AGD3 | SODF_ECOLI | *    | P0AGD3 | P60422 | sodf_ecoli | rl2_ecoli   |
| P0AGD3 | SODF_ECOLI | *    | P0AGD3 | P0A9K9 | sodf_ecoli | slyd_ecoli  |
| P0AGD3 | SODF_ECOLI | *    | P0AGD3 | P37338 | sodf_ecoli | ygae_ecoli  |
|        |            |      |        |        |            |             |
| P00448 | SODM_ECOLI | *    | P00448 | P0A6B4 | sodm_ecoli | alr1_ecoli  |
| P00448 | SODM_ECOLI | *    | P00448 | P76459 | sodm_ecoli | atoa_ecoli  |
| P00448 | SODM_ECOLI | *    | P00448 | P0A996 | sodm_ecoli | glpc_ecoli  |
| P00448 | SODM_ECOLI | *    | P00448 | P37326 | sodm_ecoli | ints_ecoli  |
| P00448 | SODM_ECOLI | *    | P00448 | P25888 | sodm_ecoli | rhle_ecoli  |
| P00448 | SODM_ECOLI | *    | P00448 | P23839 | sodm_ecoli | yicc_ecoli  |
|        |            |      |        |        |            |             |
| P0AG14 | SOHB_ECOLI | none |        |        |            |             |
|        |            |      |        |        |            |             |
| P21170 | SPEA_ECOLI | *    | P21170 | P18843 | spea_ecoli | nade_ecoli  |
| P21170 | SPEA_ECOLI | *    | P21170 | P23862 | spea_ecoli | pric_ecoli  |
| P21170 | SPEA_ECOLI | *    | P21170 | P09377 | spea_ecoli | rhas_ecoli  |
| P21170 | SPEA_ECOLI | *    | P21170 | P0AG44 | spea_ecoli | rl17_ecoli  |
| P21170 | SPEA_ECOLI | *    | P21170 | P60422 | spea_ecoli | rl2_ecoli   |
| P21170 | SPEA_ECOLI | *    | P21170 | P0A8T7 | spea_ecoli | rpoc_ecoli  |
| P21170 | SPEA_ECOLI | *    | P21170 | P0A7V0 | spea_ecoli | rs2_ecoli   |
| P21170 | SPEA_ECOLI | *    | P21170 | P0A7V3 | spea_ecoli | rs3_ecoli   |

|        |            |   |        |        |            |             |
|--------|------------|---|--------|--------|------------|-------------|
| P21170 | SPEA_ECOLI | * | P21170 | P0A7V8 | spea_ecoli | rs4_ecoli   |
| P21170 | SPEA_ECOLI | * | P21170 | P02359 | spea_ecoli | rs7_ecoli   |
| P21170 | SPEA_ECOLI | * | P21170 | P0AAP5 | spea_ecoli | yaiv_ecoli  |
| P21170 | SPEA_ECOLI | * | P21170 | P77561 | spea_ecoli | ydep_ecoli  |
| P0A7F6 | SPED_ECOLI | * | P0A7F6 | P36683 | sped_ecoli | acon2_ecoli |
| P0A7F6 | SPED_ECOLI | * | P0A7F6 | P0A6Y8 | sped_ecoli | dnak_ecoli  |
| P0A7F6 | SPED_ECOLI | * | P0A7F6 | P0A6S5 | sped_ecoli | ftsb_ecoli  |
| P0AG24 | SPOT_ECOLI | * | P0AG24 | P0A6A8 | spot_ecoli | acp_ecoli   |
| P0AG24 | SPOT_ECOLI | * | P0AG24 | P0ACF0 | spot_ecoli | dbha_ecoli  |
| P0AG24 | SPOT_ECOLI | * | P0AG24 | P0A9P6 | spot_ecoli | dead_ecoli  |
| P0AG24 | SPOT_ECOLI | * | P0AG24 | P0CE47 | spot_ecoli | eftu1_ecoli |
| P0AG24 | SPOT_ECOLI | * | P0AG24 | P43329 | spot_ecoli | hrpa_ecoli  |
| P0AG24 | SPOT_ECOLI | * | P0AG24 | P22523 | spot_ecoli | mukb_ecoli  |
| P0AG24 | SPOT_ECOLI | * | P0AG24 | P0AA10 | spot_ecoli | rl13_ecoli  |
| P0AG24 | SPOT_ECOLI | * | P0AG24 | P02413 | spot_ecoli | rl15_ecoli  |
| P0AG24 | SPOT_ECOLI | * | P0AG24 | P0AG44 | spot_ecoli | rl17_ecoli  |
| P0AG24 | SPOT_ECOLI | * | P0AG24 | P0C018 | spot_ecoli | rl18_ecoli  |
| P0AG24 | SPOT_ECOLI | * | P0AG24 | P0A7K6 | spot_ecoli | rl19_ecoli  |
| P0AG24 | SPOT_ECOLI | * | P0AG24 | P60422 | spot_ecoli | rl2_ecoli   |
| P0AG24 | SPOT_ECOLI | * | P0AG24 | P60422 | spot_ecoli | rl2_ecoli   |
| P0AG24 | SPOT_ECOLI | * | P0AG24 | P0AG48 | spot_ecoli | rl21_ecoli  |
| P0AG24 | SPOT_ECOLI | * | P0AG24 | P61175 | spot_ecoli | rl22_ecoli  |
| P0AG24 | SPOT_ECOLI | * | P0AG24 | P61175 | spot_ecoli | rl22_ecoli  |
| P0AG24 | SPOT_ECOLI | * | P0AG24 | P60624 | spot_ecoli | rl24_ecoli  |
| P0AG24 | SPOT_ECOLI | * | P0AG24 | P0A7M2 | spot_ecoli | rl28_ecoli  |
| P0AG24 | SPOT_ECOLI | * | P0AG24 | P60438 | spot_ecoli | rl3_ecoli   |
| P0AG24 | SPOT_ECOLI | * | P0AG24 | P60438 | spot_ecoli | rl3_ecoli   |
| P0AG24 | SPOT_ECOLI | * | P0AG24 | P60723 | spot_ecoli | rl4_ecoli   |
| P0AG24 | SPOT_ECOLI | * | P0AG24 | P60723 | spot_ecoli | rl4_ecoli   |
| P0AG24 | SPOT_ECOLI | * | P0AG24 | P0A7K2 | spot_ecoli | rl7_ecoli   |
| P0AG24 | SPOT_ECOLI | * | P0AG24 | P0A7R1 | spot_ecoli | rl9_ecoli   |
| P0AG24 | SPOT_ECOLI | * | P0AG24 | P37765 | spot_ecoli | rlub_ecoli  |
| P0AG24 | SPOT_ECOLI | * | P0AG24 | P0A8T7 | spot_ecoli | rpoc_ecoli  |
| P0AG24 | SPOT_ECOLI | * | P0AG24 | P0AG67 | spot_ecoli | rs1_ecoli   |
| P0AG24 | SPOT_ECOLI | * | P0AG24 | P0A7R5 | spot_ecoli | rs10_ecoli  |
| P0AG24 | SPOT_ECOLI | * | P0AG24 | P0A7R9 | spot_ecoli | rs11_ecoli  |
| P0AG24 | SPOT_ECOLI | * | P0AG24 | P0A7S3 | spot_ecoli | rs12_ecoli  |
| P0AG24 | SPOT_ECOLI | * | P0AG24 | P0AG59 | spot_ecoli | rs14_ecoli  |
| P0AG24 | SPOT_ECOLI | * | P0AG24 | P0A7T3 | spot_ecoli | rs16_ecoli  |
| P0AG24 | SPOT_ECOLI | * | P0AG24 | P0A7T7 | spot_ecoli | rs18_ecoli  |
| P0AG24 | SPOT_ECOLI | * | P0AG24 | P0A7V0 | spot_ecoli | rs2_ecoli   |
| P0AG24 | SPOT_ECOLI | * | P0AG24 | P0A7U7 | spot_ecoli | rs20_ecoli  |
| P0AG24 | SPOT_ECOLI | * | P0AG24 | P0A7V3 | spot_ecoli | rs3_ecoli   |

|        |             |   |        |        |             |             |
|--------|-------------|---|--------|--------|-------------|-------------|
| P0AG24 | SPOT_ECOLI  | * | P0AG24 | P0A7V8 | spot_ecoli  | rs4_ecoli   |
| P0AG24 | SPOT_ECOLI  | * | P0AG24 | P0A7W1 | spot_ecoli  | rs5_ecoli   |
| P0AG24 | SPOT_ECOLI  | * | P0AG24 | P02358 | spot_ecoli  | rs6_ecoli   |
| P0AG24 | SPOT_ECOLI  | * | P0AG24 | P02359 | spot_ecoli  | rs7_ecoli   |
| P0AG24 | SPOT_ECOLI  | * | P0AG24 | P02359 | spot_ecoli  | rs7_ecoli   |
| P0AG24 | SPOT_ECOLI  | * | P0AG24 | P0A7W7 | spot_ecoli  | rs8_ecoli   |
| P0AG24 | SPOT_ECOLI  | * | P0AG24 | P0A7X3 | spot_ecoli  | rs9_ecoli   |
| P0AG24 | SPOT_ECOLI  | * | P0AG24 | P21507 | spot_ecoli  | srmb_ecoli  |
| P0AG24 | SPOT_ECOLI  | * | P0AG24 | P0ABV6 | spot_ecoli  | tolr_ecoli  |
| P0AG24 | SPOT_ECOLI  | * | P0AG24 | P0AGJ2 | spot_ecoli  | trmh_ecoli  |
| P0AG24 | SPOT_ECOLI  | * | P0AG24 | Q9S4W2 | spot_ecoli  | yubm_ecoli  |
| P68191 | SRA_ECOLI   |   | none   |        |             |             |
| P21507 | SRMB_ECOLI  | * | P21507 | P0ACB0 | srmb_ecoli  | dnab_ecoli  |
| P21507 | SRMB_ECOLI  | * | P21507 | P08622 | srmb_ecoli  | dnaj_ecoli  |
| P21507 | SRMB_ECOLI  | * | P21507 | P0CE47 | srmb_ecoli  | eftu1_ecoli |
| P21507 | SRMB_ECOLI  | * | P21507 | P0A7L0 | srmb_ecoli  | rl1_ecoli   |
| P21507 | SRMB_ECOLI  | * | P21507 | P60422 | srmb_ecoli  | rl2_ecoli   |
| P21507 | SRMB_ECOLI  | * | P21507 | P60422 | srmb_ecoli  | rl2_ecoli   |
| P21507 | SRMB_ECOLI  | * | P21507 | P61175 | srmb_ecoli  | rl22_ecoli  |
| P21507 | SRMB_ECOLI  | * | P21507 | P61175 | srmb_ecoli  | rl22_ecoli  |
| P21507 | SRMB_ECOLI  | * | P21507 | P0ADZ0 | srmb_ecoli  | rl23_ecoli  |
| P21507 | SRMB_ECOLI  | * | P21507 | P60624 | srmb_ecoli  | rl24_ecoli  |
| P21507 | SRMB_ECOLI  | * | P21507 | P60624 | srmb_ecoli  | rl24_ecoli  |
| P21507 | SRMB_ECOLI  | * | P21507 | P60723 | srmb_ecoli  | rl4_ecoli   |
| P21507 | SRMB_ECOLI  | * | P21507 | P60723 | srmb_ecoli  | rl4_ecoli   |
| P21507 | SRMB_ECOLI  | * | P21507 | P0A7K2 | srmb_ecoli  | rl7_ecoli   |
| P21507 | SRMB_ECOLI  | * | P21507 | P75864 | srmb_ecoli  | rlml_ecoli  |
| P21507 | SRMB_ECOLI  | * | P21507 | P37765 | srmb_ecoli  | rlub_ecoli  |
| P21507 | SRMB_ECOLI  | * | P21507 | P0A7V0 | srmb_ecoli  | rs2_ecoli   |
| P21507 | SRMB_ECOLI  | * | P21507 | P0A7V3 | srmb_ecoli  | rs3_ecoli   |
| P21507 | SRMB_ECOLI  | * | P21507 | P0A7X3 | srmb_ecoli  | rs9_ecoli   |
| P0AGD7 | SRP54_ECOLI | * | P0AGD7 | P0A9Q7 | srp54_ecoli | adhe_ecoli  |
| P0AGD7 | SRP54_ECOLI | * | P0AGD7 | P0ABH9 | srp54_ecoli | clpa_ecoli  |
| P0AGD7 | SRP54_ECOLI | * | P0AGD7 | P0A9M0 | srp54_ecoli | lon_ecoli   |
| P0AGD7 | SRP54_ECOLI | * | P0AGD7 | P0A817 | srp54_ecoli | metk_ecoli  |
| P0AGE0 | SSB_ECOLI   | * | P0AGE0 | P15288 | ssb_ecoli   | pepd_ecoli  |
| P0AGE0 | SSB_ECOLI   | * | P0AGE0 | P25888 | ssb_ecoli   | rhle_ecoli  |
| P0ACA3 | SSPA_ECOLI  | * | P0ACA3 | P0A6F5 | sspa_ecoli  | ch60_ecoli  |
| P0ACA3 | SSPA_ECOLI  | * | P0ACA3 | P0A6Y8 | sspa_ecoli  | dnak_ecoli  |
| P0ACA3 | SSPA_ECOLI  | * | P0ACA3 | P54745 | sspa_ecoli  | hrsa_ecoli  |

|        |            |   |        |        |            |            |
|--------|------------|---|--------|--------|------------|------------|
| POACA3 | SSPA_ECOLI | * | POACA3 | P09373 | sspa_ecoli | pflb_ecoli |
| POACA3 | SSPA_ECOLI | * | POACA3 | P0A7R1 | sspa_ecoli | rl9_ecoli  |
| POACA3 | SSPA_ECOLI | * | POACA3 | P0A7Z4 | sspa_ecoli | rpoa_ecoli |
| POACA3 | SSPA_ECOLI | * | POACA3 | P0A8V2 | sspa_ecoli | rpob_ecoli |
| POACA3 | SSPA_ECOLI | * | POACA3 | P0A8T7 | sspa_ecoli | rpoc_ecoli |
| POACA3 | SSPA_ECOLI | * | POACA3 | P0A8N5 | sspa_ecoli | syk2_ecoli |
| POACA3 | SSPA_ECOLI | * | POACA3 | P0A8L1 | sspa_ecoli | sys_ecoli  |
| POACA3 | SSPA_ECOLI | * | POACA3 | P30139 | sspa_ecoli | thig_ecoli |
| POACA3 | SSPA_ECOLI | * | POACA3 | P0AAD4 | sspa_ecoli | tyrp_ecoli |
| POACA3 | SSPA_ECOLI | * | POACA3 | P77400 | sspa_ecoli | ybat_ecoli |
| POA832 | SSRP_ECOLI | * | POA832 | P33224 | ssrp_ecoli | aidb_ecoli |
| POA832 | SSRP_ECOLI | * | POA832 | P0ABH9 | ssrp_ecoli | clpa_ecoli |
| POA832 | SSRP_ECOLI | * | POA832 | P0ACF0 | ssrp_ecoli | dbha_ecoli |
| POA832 | SSRP_ECOLI | * | POA832 | P0ACF4 | ssrp_ecoli | dbhb_ecoli |
| POA832 | SSRP_ECOLI | * | POA832 | P0AES4 | ssrp_ecoli | gyra_ecoli |
| POA832 | SSRP_ECOLI | * | POA832 | P0AES6 | ssrp_ecoli | gyrb_ecoli |
| POA832 | SSRP_ECOLI | * | POA832 | P0A705 | ssrp_ecoli | if2_ecoli  |
| POA832 | SSRP_ECOLI | * | POA832 | P0AFI2 | ssrp_ecoli | parc_ecoli |
| POA832 | SSRP_ECOLI | * | POA832 | P00490 | ssrp_ecoli | phsm_ecoli |
| POA832 | SSRP_ECOLI | * | POA832 | P0A7L0 | ssrp_ecoli | rl1_ecoli  |
| POA832 | SSRP_ECOLI | * | POA832 | P0AA10 | ssrp_ecoli | rl13_ecoli |
| POA832 | SSRP_ECOLI | * | POA832 | P60624 | ssrp_ecoli | rl24_ecoli |
| POA832 | SSRP_ECOLI | * | POA832 | P0A7M2 | ssrp_ecoli | rl28_ecoli |
| POA832 | SSRP_ECOLI | * | POA832 | P0AG55 | ssrp_ecoli | rl6_ecoli  |
| POA832 | SSRP_ECOLI | * | POA832 | P0AG55 | ssrp_ecoli | rl6_ecoli  |
| POA832 | SSRP_ECOLI | * | POA832 | P0AG67 | ssrp_ecoli | rs1_ecoli  |
| POA832 | SSRP_ECOLI | * | POA832 | P0AG67 | ssrp_ecoli | rs1_ecoli  |
| POA832 | SSRP_ECOLI | * | POA832 | P0AG59 | ssrp_ecoli | rs14_ecoli |
| POA832 | SSRP_ECOLI | * | POA832 | P0A7V0 | ssrp_ecoli | rs2_ecoli  |
| POA832 | SSRP_ECOLI | * | POA832 | P0A7V0 | ssrp_ecoli | rs2_ecoli  |
| POA832 | SSRP_ECOLI | * | POA832 | P0A7V3 | ssrp_ecoli | rs3_ecoli  |
| POA832 | SSRP_ECOLI | * | POA832 | P0A7W1 | ssrp_ecoli | rs5_ecoli  |
| POA832 | SSRP_ECOLI | * | POA832 | P10408 | ssrp_ecoli | seca_ecoli |
| POA832 | SSRP_ECOLI | * | POA832 | P14081 | ssrp_ecoli | selb_ecoli |
| POA832 | SSRP_ECOLI | * | POA832 | P0AEU7 | ssrp_ecoli | skp_ecoli  |
| POA832 | SSRP_ECOLI | * | POA832 | P0AGJ7 | ssrp_ecoli | trml_ecoli |
| POA832 | SSRP_ECOLI | * | POA832 | P09184 | ssrp_ecoli | vsr_ecoli  |
| POA832 | SSRP_ECOLI | * | POA832 | P22525 | ssrp_ecoli | yccb_ecoli |
| POA832 | SSRP_ECOLI | * | POA832 | P0AB35 | ssrp_ecoli | ycfj_ecoli |
| POA832 | SSRP_ECOLI | * | POA832 | P75989 | ssrp_ecoli | ycge_ecoli |
| POA832 | SSRP_ECOLI | * | POA832 | P0A8M6 | ssrp_ecoli | yeex_ecoli |
| POA832 | SSRP_ECOLI | * | POA832 | P0AGJ5 | ssrp_ecoli | yfif_ecoli |
| P76072 | STFR_ECOLI | * | P76072 | P00562 | stfr_ecoli | ak2h_ecoli |



|        |            |   |        |        |            |             |
|--------|------------|---|--------|--------|------------|-------------|
| P76072 | STFR_ECOLI | * | P76072 | P23325 | stfr_ecoli | arpa_ecoli  |
| P76072 | STFR_ECOLI | * | P76072 | P00582 | stfr_ecoli | dpo1_ecoli  |
| P76072 | STFR_ECOLI | * | P76072 | P0AFG8 | stfr_ecoli | odp1_ecoli  |
| P76072 | STFR_ECOLI | * | P76072 | P75905 | stfr_ecoli | pgac_ecoli  |
| P76072 | STFR_ECOLI | * | P76072 | P60422 | stfr_ecoli | rl2_ecoli   |
| P76072 | STFR_ECOLI | * | P76072 | P76403 | stfr_ecoli | yegq_ecoli  |
| P0ACG1 | STPA_ECOLI | * | P0ACG1 | P0A6Z3 | stpa_ecoli | htpg_ecoli  |
| P0ACG1 | STPA_ECOLI | * | P0ACG1 | P0A717 | stpa_ecoli | kprs_ecoli  |
| P0ACG1 | STPA_ECOLI | * | P0ACG1 | P60422 | stpa_ecoli | rl2_ecoli   |
| P0ACG1 | STPA_ECOLI | * | P0ACG1 | P0A7V8 | stpa_ecoli | rs4_ecoli   |
| P0ACG1 | STPA_ECOLI | * | P0ACG1 | P0A9K9 | stpa_ecoli | slyd_ecoli  |
| P0ACG1 | STPA_ECOLI | * | P0ACG1 | P75989 | stpa_ecoli | ycge_ecoli  |
| P0A836 | SUCC_ECOLI | * | P0A836 | P0AC41 | succ_ecoli | dhsa_ecoli  |
| P0A836 | SUCC_ECOLI | * | P0A836 | P0AC53 | succ_ecoli | g6pd_ecoli  |
| P0A836 | SUCC_ECOLI | * | P0A836 | P0A717 | succ_ecoli | kprs_ecoli  |
| P0A836 | SUCC_ECOLI | * | P0A836 | P0AFG6 | succ_ecoli | odo2_ecoli  |
| P0A836 | SUCC_ECOLI | * | P0A836 | P0AA43 | succ_ecoli | rsua_ecoli  |
| P0A836 | SUCC_ECOLI | * | P0A836 | P0AGE9 | succ_ecoli | sucd_ecoli  |
| P0A836 | SUCC_ECOLI | * | P0A836 | P0AGE9 | succ_ecoli | sucd_ecoli  |
| P0A836 | SUCC_ECOLI | * | P0A836 | P0AGE9 | succ_ecoli | sucd_ecoli  |
| P0A836 | SUCC_ECOLI | * | P0A836 | P04152 | succ_ecoli | umuc_ecoli  |
| P0AGE9 | SUCD_ECOLI | * | P0AGE9 | P0AC41 | sucd_ecoli | dhsa_ecoli  |
| P0AGE9 | SUCD_ECOLI | * | P0AGE9 | P10443 | sucd_ecoli | dpo3a_ecoli |
| P0AGE9 | SUCD_ECOLI | * | P0AGE9 | P0AA43 | sucd_ecoli | rsua_ecoli  |
| P77499 | SUFC_ECOLI | * | P77499 | P0A6F5 | sufc_ecoli | ch60_ecoli  |
| P77499 | SUFC_ECOLI | * | P77499 | P0ABK5 | sufc_ecoli | cysk_ecoli  |
| P77499 | SUFC_ECOLI | * | P77499 | P33940 | sufc_ecoli | mqq_ecoli   |
| P77499 | SUFC_ECOLI | * | P77499 | P08373 | sufc_ecoli | murb_ecoli  |
| P77499 | SUFC_ECOLI | * | P77499 | P0A7L0 | sufc_ecoli | rl1_ecoli   |
| P77499 | SUFC_ECOLI | * | P77499 | P77522 | sufc_ecoli | sufb_ecoli  |
| P77499 | SUFC_ECOLI | * | P77499 | P77689 | sufc_ecoli | sufd_ecoli  |
| P77499 | SUFC_ECOLI | * | P77499 | P0AFQ2 | sufc_ecoli | ybhs_ecoli  |
| P77444 | SUFS_ECOLI | * | P77444 | P0A6F5 | sufs_ecoli | ch60_ecoli  |
| P77444 | SUFS_ECOLI | * | P77444 | P0ABT2 | sufs_ecoli | dps_ecoli   |
| P77444 | SUFS_ECOLI | * | P77444 | P0A9M0 | sufs_ecoli | lon_ecoli   |
| P77444 | SUFS_ECOLI | * | P77444 | P69367 | sufs_ecoli | mdth_ecoli  |
| P77444 | SUFS_ECOLI | * | P77444 | P77316 | sufs_ecoli | ybdr_ecoli  |
| P77444 | SUFS_ECOLI | * | P77444 | P76463 | sufs_ecoli | yfaq_ecoli  |
| P77444 | SUFS_ECOLI | * | P77444 | P28722 | sufs_ecoli | yhca_ecoli  |

|        |            |   |        |        |            |             |
|--------|------------|---|--------|--------|------------|-------------|
| P0ABZ6 | SURA_ECOLI | * | P0ABZ6 | P0A9P0 | sura_ecoli | dldh_ecoli  |
| P0ABZ6 | SURA_ECOLI | * | P0ABZ6 | P0A6Y8 | sura_ecoli | dnak_ecoli  |
| P0ABZ6 | SURA_ECOLI | * | P0ABZ6 | P0AAI3 | sura_ecoli | ftsh_ecoli  |
| P0ABZ6 | SURA_ECOLI | * | P0ABZ6 | P17334 | sura_ecoli | ptqc_ecoli  |
| P0ABZ6 | SURA_ECOLI | * | P0ABZ6 | P0A7K2 | sura_ecoli | rl7_ecoli   |
| P0ABZ6 | SURA_ECOLI | * | P0ABZ6 | P0AG59 | sura_ecoli | rs14_ecoli  |
| P0ABZ6 | SURA_ECOLI | * | P0ABZ6 | P04968 | sura_ecoli | thd1_ecoli  |
| P0ABZ6 | SURA_ECOLI | * | P0ABZ6 | P76069 | sura_ecoli | yday_ecoli  |
|        |            |   |        |        |            |             |
| P00957 | SYA_ECOLI  | * | P00957 | P37652 | sya_ecoli  | bcsb_ecoli  |
| P00957 | SYA_ECOLI  | * | P00957 | P0A6Y8 | sya_ecoli  | dnak_ecoli  |
| P00957 | SYA_ECOLI  | * | P00957 | P0CE47 | sya_ecoli  | eftu1_ecoli |
| P00957 | SYA_ECOLI  | * | P00957 | P0A7V0 | sya_ecoli  | rs2_ecoli   |
| P00957 | SYA_ECOLI  | * | P00957 | P38104 | sya_ecoli  | rspa_ecoli  |
| P00957 | SYA_ECOLI  | * | P00957 | P76160 | sya_ecoli  | ydfc_ecoli  |
| P00957 | SYA_ECOLI  | * | P00957 | P17994 | sya_ecoli  | yfaa_ecoli  |
|        |            |   |        |        |            |             |
| P21888 | SYC_ECOLI  | * | P21888 | P0A6K3 | syc_ecoli  | def_ecoli   |
| P21888 | SYC_ECOLI  | * | P21888 | P18843 | syc_ecoli  | nade_ecoli  |
|        |            |   |        |        |            |             |
| P21889 | SYD_ECOLI  | * | P21889 | P36683 | syd_ecoli  | acon2_ecoli |
| P21889 | SYD_ECOLI  | * | P21889 | P09832 | syd_ecoli  | gltc_ecoli  |
| P21889 | SYD_ECOLI  | * | P21889 | P0A738 | syd_ecoli  | moac_ecoli  |
| P21889 | SYD_ECOLI  | * | P21889 | P18843 | syd_ecoli  | nade_ecoli  |
| P21889 | SYD_ECOLI  | * | P21889 | P31061 | syd_ecoli  | noha_ecoli  |
| P21889 | SYD_ECOLI  | * | P21889 | P0A8T7 | syd_ecoli  | rpoc_ecoli  |
| P21889 | SYD_ECOLI  | * | P21889 | P0A9K9 | syd_ecoli  | slyd_ecoli  |
| P21889 | SYD_ECOLI  | * | P21889 | P0A8M0 | syd_ecoli  | syn_ecoli   |
|        |            |   |        |        |            |             |
| P04805 | SYE_ECOLI  | * | P04805 | P31554 | syecoli    | lptd_ecoli  |
| P04805 | SYE_ECOLI  | * | P04805 | P77188 | syecoli    | matc_ecoli  |
| P04805 | SYE_ECOLI  | * | P04805 | P60723 | syecoli    | rl4_ecoli   |
| P04805 | SYE_ECOLI  | * | P04805 | P0A7V3 | syecoli    | rs3_ecoli   |
| P04805 | SYE_ECOLI  | * | P04805 | P0A9K9 | syecoli    | slyd_ecoli  |
| P04805 | SYE_ECOLI  | * | P04805 | P76160 | syecoli    | ydfc_ecoli  |
|        |            |   |        |        |            |             |
| P07395 | SYFB_ECOLI | * | P07395 | P32715 | syfb_ecoli | mdto_ecoli  |
| P07395 | SYFB_ECOLI | * | P07395 | P30958 | syfb_ecoli | mfd_ecoli   |
| P07395 | SYFB_ECOLI | * | P07395 | P0A7V0 | syfb_ecoli | rs2_ecoli   |
| P07395 | SYFB_ECOLI | * | P07395 | P0AG90 | syfb_ecoli | secd_ecoli  |
| P07395 | SYFB_ECOLI | * | P07395 | P08312 | syfb_ecoli | syfa_ecoli  |
| P07395 | SYFB_ECOLI | * | P07395 | P08312 | syfb_ecoli | syfa_ecoli  |
| P07395 | SYFB_ECOLI | * | P07395 | P76237 | syfb_ecoli | yeaj_ecoli  |
| P07395 | SYFB_ECOLI | * | P07395 | Q46841 | syfb_ecoli | yghq_ecoli  |

|        |            |   |        |        |            |             |
|--------|------------|---|--------|--------|------------|-------------|
| P00960 | SYGA_ECOLI | * | P00960 | P08622 | syga_ecoli | dnaj_ecoli  |
| P00960 | SYGA_ECOLI | * | P00960 | P08622 | syga_ecoli | dnaj_ecoli  |
| P00960 | SYGA_ECOLI | * | P00960 | P0CE47 | syga_ecoli | eftu1_ecoli |
| P00960 | SYGA_ECOLI | * | P00960 | P09394 | syga_ecoli | glpq_ecoli  |
| P00960 | SYGA_ECOLI | * | P00960 | P23865 | syga_ecoli | prc_ecoli   |
| P00960 | SYGA_ECOLI | * | P00960 | P0AA10 | syga_ecoli | rl13_ecoli  |
| P00960 | SYGA_ECOLI | * | P00960 | P0ADY7 | syga_ecoli | rl16_ecoli  |
| P00960 | SYGA_ECOLI | * | P00960 | P0A7K6 | syga_ecoli | rl19_ecoli  |
| P00960 | SYGA_ECOLI | * | P00960 | P0AG48 | syga_ecoli | rl21_ecoli  |
| P00960 | SYGA_ECOLI | * | P00960 | P61175 | syga_ecoli | rl22_ecoli  |
| P00960 | SYGA_ECOLI | * | P00960 | P0A7M2 | syga_ecoli | rl28_ecoli  |
| P00960 | SYGA_ECOLI | * | P00960 | P60723 | syga_ecoli | rl4_ecoli   |
| P00960 | SYGA_ECOLI | * | P00960 | P0AG55 | syga_ecoli | rl6_ecoli   |
| P00960 | SYGA_ECOLI | * | P00960 | P0A7S9 | syga_ecoli | rs13_ecoli  |
| P00960 | SYGA_ECOLI | * | P00960 | P0A7T3 | syga_ecoli | rs16_ecoli  |
| P00960 | SYGA_ECOLI | * | P00960 | P0A7V0 | syga_ecoli | rs2_ecoli   |
| P00960 | SYGA_ECOLI | * | P00960 | P0A7V3 | syga_ecoli | rs3_ecoli   |
| P00960 | SYGA_ECOLI | * | P00960 | P0A7W1 | syga_ecoli | rs5_ecoli   |
|        |            |   |        |        |            |             |
| P00961 | SYGB_ECOLI | * | P00961 | P0AEF0 | sygb_ecoli | dnac_ecoli  |
| P00961 | SYGB_ECOLI | * | P00961 | P15038 | sygb_ecoli | held_ecoli  |
| P00961 | SYGB_ECOLI | * | P00961 | P05847 | sygb_ecoli | ttda_ecoli  |
|        |            |   |        |        |            |             |
| P00956 | SYI_ECOLI  | * | P00956 | P0ACN4 | syi_ecoli  | allr_ecoli  |
| P00956 | SYI_ECOLI  | * | P00956 | P08622 | syi_ecoli  | dnaj_ecoli  |
| P00956 | SYI_ECOLI  | * | P00956 | P0CE47 | syi_ecoli  | eftu1_ecoli |
| P00956 | SYI_ECOLI  | * | P00956 | P13035 | syi_ecoli  | glpd_ecoli  |
| P00956 | SYI_ECOLI  | * | P00956 | P19930 | syi_ecoli  | hyad_ecoli  |
| P00956 | SYI_ECOLI  | * | P00956 | P0A7B1 | syi_ecoli  | ppk_ecoli   |
| P00956 | SYI_ECOLI  | * | P00956 | P02925 | syi_ecoli  | rbsb_ecoli  |
| P00956 | SYI_ECOLI  | * | P00956 | P36661 | syi_ecoli  | ycce_ecoli  |
| P00956 | SYI_ECOLI  | * | P00956 | P39336 | syi_ecoli  | yjgl_ecoli  |
|        |            |   |        |        |            |             |
| POA8N3 | SYK1_ECOLI | * | POA8N3 | P12995 | syk1_ecoli | bioa_ecoli  |
| POA8N3 | SYK1_ECOLI | * | POA8N3 | P15877 | syk1_ecoli | dhg_ecoli   |
| POA8N3 | SYK1_ECOLI | * | POA8N3 | P77399 | syk1_ecoli | fadj_ecoli  |
| POA8N3 | SYK1_ECOLI | * | POA8N3 | P18843 | syk1_ecoli | nade_ecoli  |
| POA8N3 | SYK1_ECOLI | * | POA8N3 | P0A794 | syk1_ecoli | pdxj_ecoli  |
| POA8N3 | SYK1_ECOLI | * | POA8N3 | P0AFJ5 | syk1_ecoli | phob_ecoli  |
| POA8N3 | SYK1_ECOLI | * | POA8N3 | P05458 | syk1_ecoli | ptrn_ecoli  |
| POA8N3 | SYK1_ECOLI | * | POA8N3 | P09377 | syk1_ecoli | rhas_ecoli  |
| POA8N3 | SYK1_ECOLI | * | POA8N3 | P16916 | syk1_ecoli | rhas_ecoli  |
| POA8N3 | SYK1_ECOLI | * | POA8N3 | P11868 | syk1_ecoli | tdcd_ecoli  |
| POA8N3 | SYK1_ECOLI | * | POA8N3 | P77561 | syk1_ecoli | ydep_ecoli  |
| POA8N3 | SYK1_ECOLI | * | POA8N3 | Q46802 | syk1_ecoli | ygev_ecoli  |

|        |            |          |        |            |            |
|--------|------------|----------|--------|------------|------------|
| POA8N5 | SYK2_ECOLI | * POA8N5 | P0A9Q7 | syk2_ecoli | adhe_ecoli |
| POA8N5 | SYK2_ECOLI | * POA8N5 | P21179 | syk2_ecoli | cate_ecoli |
| POA8N5 | SYK2_ECOLI | * POA8N5 | P63284 | syk2_ecoli | clpb_ecoli |
| POA8N5 | SYK2_ECOLI | * POA8N5 | P0A9Y6 | syk2_ecoli | cspc_ecoli |
| POA8N5 | SYK2_ECOLI | * POA8N5 | P0ABK5 | syk2_ecoli | cysk_ecoli |
| POA8N5 | SYK2_ECOLI | * POA8N5 | P00861 | syk2_ecoli | dcda_ecoli |
| POA8N5 | SYK2_ECOLI | * POA8N5 | P69908 | syk2_ecoli | dcea_ecoli |
| POA8N5 | SYK2_ECOLI | * POA8N5 | P69910 | syk2_ecoli | dceb_ecoli |
| POA8N5 | SYK2_ECOLI | * POA8N5 | P0ABT2 | syk2_ecoli | dps_ecoli  |
| POA8N5 | SYK2_ECOLI | * POA8N5 | P0ABT2 | syk2_ecoli | dps_ecoli  |
| POA8N5 | SYK2_ECOLI | * POA8N5 | P0A6M8 | syk2_ecoli | efg_ecoli  |
| POA8N5 | SYK2_ECOLI | * POA8N5 | P0A6P9 | syk2_ecoli | eno_ecoli  |
| POA8N5 | SYK2_ECOLI | * POA8N5 | P0A6P9 | syk2_ecoli | eno_ecoli  |
| POA8N5 | SYK2_ECOLI | * POA8N5 | P77733 | syk2_ecoli | focb_ecoli |
| POA8N5 | SYK2_ECOLI | * POA8N5 | P68066 | syk2_ecoli | grca_ecoli |
| POA8N5 | SYK2_ECOLI | * POA8N5 | P0AFB1 | syk2_ecoli | nlpi_ecoli |
| POA8N5 | SYK2_ECOLI | * POA8N5 | P09373 | syk2_ecoli | pflb_ecoli |
| POA8N5 | SYK2_ECOLI | * POA8N5 | P09373 | syk2_ecoli | pflb_ecoli |
| POA8N5 | SYK2_ECOLI | * POA8N5 | P0A799 | syk2_ecoli | pgk_ecoli  |
| POA8N5 | SYK2_ECOLI | * POA8N5 | P0A8V2 | syk2_ecoli | rpob_ecoli |
| POA8N5 | SYK2_ECOLI | * POA8N5 | P0A8T7 | syk2_ecoli | rpoc_ecoli |
| POA8N5 | SYK2_ECOLI | * POA8N5 | P00956 | syk2_ecoli | syi_ecoli  |
| POA8N5 | SYK2_ECOLI | * POA8N5 | P0A8L1 | syk2_ecoli | sys_ecoli  |
| POA8N5 | SYK2_ECOLI | * POA8N5 | P0A853 | syk2_ecoli | tnaa_ecoli |
| POA8N5 | SYK2_ECOLI | * POA8N5 | P32057 | syk2_ecoli | wcai_ecoli |
| POA8N5 | SYK2_ECOLI | * POA8N5 | P0A8G6 | syk2_ecoli | wrba_ecoli |
| POA8N5 | SYK2_ECOLI | * POA8N5 | P77169 | syk2_ecoli | yagj_ecoli |
| POA8N5 | SYK2_ECOLI | * POA8N5 | P76185 | syk2_ecoli | ydhj_ecoli |
| POA8N5 | SYK2_ECOLI | * POA8N5 | P33346 | syk2_ecoli | yehi_ecoli |
| POA8N5 | SYK2_ECOLI | * POA8N5 | P0AD33 | syk2_ecoli | yfcz_ecoli |
| POA8N5 | SYK2_ECOLI | * POA8N5 | P0ADU5 | syk2_ecoli | ygiw_ecoli |
| POA8N5 | SYK2_ECOLI | * POA8N5 | P37662 | syk2_ecoli | yhjx_ecoli |
|        |            |          |        |            |            |
| P07813 | SYL_ECOLI  | * P07813 | P0AE18 | syl_ecoli  | ampm_ecoli |
| P07813 | SYL_ECOLI  | * P07813 | P0A6F5 | syl_ecoli  | ch60_ecoli |
| P07813 | SYL_ECOLI  | * P07813 | P33129 | syl_ecoli  | htre_ecoli |
| P07813 | SYL_ECOLI  | * P07813 | P16431 | syl_ecoli  | hyce_ecoli |
| P07813 | SYL_ECOLI  | * P07813 | P0A7J7 | syl_ecoli  | rl11_ecoli |
| P07813 | SYL_ECOLI  | * P07813 | P0ADZ0 | syl_ecoli  | rl23_ecoli |
| P07813 | SYL_ECOLI  | * P07813 | P60438 | syl_ecoli  | rl3_ecoli  |
| P07813 | SYL_ECOLI  | * P07813 | P60723 | syl_ecoli  | rl4_ecoli  |
| P07813 | SYL_ECOLI  | * P07813 | P0A7K2 | syl_ecoli  | rl7_ecoli  |
| P07813 | SYL_ECOLI  | * P07813 | P0A7R5 | syl_ecoli  | rs10_ecoli |
| P07813 | SYL_ECOLI  | * P07813 | P0A7T3 | syl_ecoli  | rs16_ecoli |

|        |           |   |        |          |                           |                             |
|--------|-----------|---|--------|----------|---------------------------|-----------------------------|
| P07813 | SYL_ECOLI | * | P07813 | P0A7V0   | <a href="#">syl_ecoli</a> | <a href="#">rs2_ecoli</a>   |
| P07813 | SYL_ECOLI | * | P07813 | P76245   | <a href="#">syl_ecoli</a> | <a href="#">yeap_ecoli</a>  |
| P07813 | SYL_ECOLI | * | P07813 | P32689   | <a href="#">syl_ecoli</a> | <a href="#">yjbh_ecoli</a>  |
| P00959 | SYM_ECOLI | * | P00959 | P60422   | <a href="#">sym_ecoli</a> | <a href="#">rl2_ecoli</a>   |
| P0A8M0 | SYN_ECOLI | * | P0A8M0 | P18843   | <a href="#">syn_ecoli</a> | <a href="#">nade_ecoli</a>  |
| P16659 | SYP_ECOLI | * | P16659 | P0A6F5   | <a href="#">syp_ecoli</a> | <a href="#">ch60_ecoli</a>  |
| P16659 | SYP_ECOLI | * | P16659 | P0A988   | <a href="#">syp_ecoli</a> | <a href="#">dpo3b_ecoli</a> |
| P16659 | SYP_ECOLI | * | P16659 | P15070   | <a href="#">syp_ecoli</a> | <a href="#">flin_ecoli</a>  |
| P16659 | SYP_ECOLI | * | P16659 | P0AFG8   | <a href="#">syp_ecoli</a> | <a href="#">odp1_ecoli</a>  |
| P16659 | SYP_ECOLI | * | P16659 | P63284-1 | <a href="#">syp_ecoli</a> | <a href="#">P63284-1</a>    |
| P00962 | SYQ_ECOLI |   | none   |          |                           |                             |
| P11875 | SYR_ECOLI | * | P11875 | P0AC41   | <a href="#">syr_ecoli</a> | <a href="#">dhsa_ecoli</a>  |
| P11875 | SYR_ECOLI | * | P11875 | P33602   | <a href="#">syr_ecoli</a> | <a href="#">nuog_ecoli</a>  |
| P11875 | SYR_ECOLI | * | P11875 | P0AFG8   | <a href="#">syr_ecoli</a> | <a href="#">odp1_ecoli</a>  |
| P11875 | SYR_ECOLI | * | P11875 | P07395   | <a href="#">syr_ecoli</a> | <a href="#">syfb_ecoli</a>  |
| P11875 | SYR_ECOLI | * | P11875 | P77746   | <a href="#">syr_ecoli</a> | <a href="#">ybdo_ecoli</a>  |
| P11875 | SYR_ECOLI | * | P11875 | P77561   | <a href="#">syr_ecoli</a> | <a href="#">ydep_ecoli</a>  |
| P0A8L1 | SYS_ECOLI | * | P0A8L1 | P37652   | <a href="#">sys_ecoli</a> | <a href="#">bcsb_ecoli</a>  |
| P0A8L1 | SYS_ECOLI | * | P0A8L1 | P0A6F5   | <a href="#">sys_ecoli</a> | <a href="#">ch60_ecoli</a>  |
| P0A8L1 | SYS_ECOLI | * | P0A8L1 | P0C8J8   | <a href="#">sys_ecoli</a> | <a href="#">gatz_ecoli</a>  |
| P0A8L1 | SYS_ECOLI | * | P0A8L1 | P0A7H0   | <a href="#">sys_ecoli</a> | <a href="#">recf_ecoli</a>  |
| P0A8L1 | SYS_ECOLI | * | P0A8L1 | P33030   | <a href="#">sys_ecoli</a> | <a href="#">yeir_ecoli</a>  |
| P0A8L1 | SYS_ECOLI | * | P0A8L1 | P37908   | <a href="#">sys_ecoli</a> | <a href="#">yfjd_ecoli</a>  |
| P0A8L1 | SYS_ECOLI | * | P0A8L1 | P0AF82   | <a href="#">sys_ecoli</a> | <a href="#">yjfn_ecoli</a>  |
| P0A8M3 | SYT_ECOLI | * | P0A8M3 | P0A6Y8   | <a href="#">syt_ecoli</a> | <a href="#">dnak_ecoli</a>  |
| P0A8M3 | SYT_ECOLI | * | P0A8M3 | P0A6P9   | <a href="#">syt_ecoli</a> | <a href="#">eno_ecoli</a>   |
| P0A8M3 | SYT_ECOLI | * | P0A8M3 | P0C054   | <a href="#">syt_ecoli</a> | <a href="#">ibpa_ecoli</a>  |
| P0A8M3 | SYT_ECOLI | * | P0A8M3 | P18843   | <a href="#">syt_ecoli</a> | <a href="#">nade_ecoli</a>  |
| P0A8M3 | SYT_ECOLI | * | P0A8M3 | P0A7H6   | <a href="#">syt_ecoli</a> | <a href="#">recr_ecoli</a>  |
| P0A8M3 | SYT_ECOLI | * | P0A8M3 | P0A7L0   | <a href="#">syt_ecoli</a> | <a href="#">rl1_ecoli</a>   |
| P0A8M3 | SYT_ECOLI | * | P0A8M3 | P0A7L0   | <a href="#">syt_ecoli</a> | <a href="#">rl1_ecoli</a>   |
| P0A8M3 | SYT_ECOLI | * | P0A8M3 | P0AA10   | <a href="#">syt_ecoli</a> | <a href="#">rl13_ecoli</a>  |
| P0A8M3 | SYT_ECOLI | * | P0A8M3 | P0A7K6   | <a href="#">syt_ecoli</a> | <a href="#">rl19_ecoli</a>  |
| P0A8M3 | SYT_ECOLI | * | P0A8M3 | P61175   | <a href="#">syt_ecoli</a> | <a href="#">rl22_ecoli</a>  |
| P0A8M3 | SYT_ECOLI | * | P0A8M3 | P60438   | <a href="#">syt_ecoli</a> | <a href="#">rl3_ecoli</a>   |
| P0A8M3 | SYT_ECOLI | * | P0A8M3 | P0A7R1   | <a href="#">syt_ecoli</a> | <a href="#">rl9_ecoli</a>   |
| P0A8M3 | SYT_ECOLI | * | P0A8M3 | P0AG07   | <a href="#">syt_ecoli</a> | <a href="#">rpe_ecoli</a>   |
| P0A8M3 | SYT_ECOLI | * | P0A8M3 | P0AG67   | <a href="#">syt_ecoli</a> | <a href="#">rs1_ecoli</a>   |

|        |            |   |        |        |            |            |
|--------|------------|---|--------|--------|------------|------------|
| POA8M3 | SYT_ECOLI  | * | POA8M3 | P0A7R5 | syt_ecoli  | rs10_ecoli |
| POA8M3 | SYT_ECOLI  | * | POA8M3 | P0A7S9 | syt_ecoli  | rs13_ecoli |
| POA8M3 | SYT_ECOLI  | * | POA8M3 | P0AG59 | syt_ecoli  | rs14_ecoli |
| POA8M3 | SYT_ECOLI  | * | POA8M3 | P0A7V0 | syt_ecoli  | rs2_ecoli  |
| POA8M3 | SYT_ECOLI  | * | POA8M3 | P0A7U7 | syt_ecoli  | rs20_ecoli |
| POA8M3 | SYT_ECOLI  | * | POA8M3 | P0A7V3 | syt_ecoli  | rs3_ecoli  |
| POA8M3 | SYT_ECOLI  | * | POA8M3 | P0A7W1 | syt_ecoli  | rs5_ecoli  |
| POA8M3 | SYT_ECOLI  | * | POA8M3 | P02358 | syt_ecoli  | rs6_ecoli  |
| POA8M3 | SYT_ECOLI  | * | POA8M3 | P02359 | syt_ecoli  | rs7_ecoli  |
| POA8M3 | SYT_ECOLI  | * | POA8M3 | P0ACC9 | syt_ecoli  | wcab_ecoli |
| POA8M3 | SYT_ECOLI  | * | POA8M3 | P46142 | syt_ecoli  | yggm_ecoli |
| POA8M3 | SYT_ECOLI  | * | POA8M3 | P0AGK4 | syt_ecoli  | yhby_ecoli |
| POA8M3 | SYT_ECOLI  | * | POA8M3 | P23839 | syt_ecoli  | yicc_ecoli |
| P07118 | SYV_ECOLI  | * | P07118 | P46837 | syv_ecoli  | yhgf_ecoli |
| P00954 | SYW_ECOLI  | * | P00954 | P0AE18 | syw_ecoli  | ampm_ecoli |
| P00954 | SYW_ECOLI  | * | P00954 | P0ACV2 | syw_ecoli  | ddg_ecoli  |
| P00954 | SYW_ECOLI  | * | P00954 | P37005 | syw_ecoli  | last_ecoli |
| P00954 | SYW_ECOLI  | * | P00954 | P18843 | syw_ecoli  | nade_ecoli |
| P00954 | SYW_ECOLI  | * | P00954 | P0A7B1 | syw_ecoli  | ppk_ecoli  |
| P00954 | SYW_ECOLI  | * | P00954 | P0AA10 | syw_ecoli  | rl13_ecoli |
| P00954 | SYW_ECOLI  | * | P00954 | P61175 | syw_ecoli  | rl22_ecoli |
| P00954 | SYW_ECOLI  | * | P00954 | P60438 | syw_ecoli  | rl3_ecoli  |
| P00954 | SYW_ECOLI  | * | P00954 | P0A7V0 | syw_ecoli  | rs2_ecoli  |
| P00954 | SYW_ECOLI  | * | P00954 | P0A7V8 | syw_ecoli  | rs4_ecoli  |
| P00954 | SYW_ECOLI  | * | P00954 | P0A7W1 | syw_ecoli  | rs5_ecoli  |
| P00954 | SYW_ECOLI  | * | P00954 | P16456 | syw_ecoli  | seld_ecoli |
| P0AGJ9 | SYX_ECOLI  | * | P0AGJ9 | P12999 | syy_ecoli  | bioc_ecoli |
| P0AGJ9 | SYX_ECOLI  | * | P0AGJ9 | P0AC41 | syy_ecoli  | dhsa_ecoli |
| P0AGJ9 | SYX_ECOLI  | * | P0AGJ9 | P0A6Y8 | syy_ecoli  | dnak_ecoli |
| P0AGJ9 | SYX_ECOLI  | * | P0AGJ9 | P0A6Y8 | syy_ecoli  | dnak_ecoli |
| P0AGJ9 | SYX_ECOLI  | * | P0AGJ9 | P18843 | syy_ecoli  | nade_ecoli |
| P0AGJ9 | SYX_ECOLI  | * | P0AGJ9 | P0AFG6 | syy_ecoli  | odo2_ecoli |
| P0AGJ9 | SYX_ECOLI  | * | P0AGJ9 | P10408 | syy_ecoli  | seca_ecoli |
| P0AGJ9 | SYX_ECOLI  | * | P0AGJ9 | P45955 | syy_ecoli  | ybgf_ecoli |
| P25239 | T257_ECOLX |   | none   |        |            |            |
| POA867 | TALA_ECOLI | * | POA867 | P77188 | tala_ecoli | matc_ecoli |
| POA867 | TALA_ECOLI | * | POA867 | P18843 | tala_ecoli | nade_ecoli |
| POA870 | TALB_ECOLI | * | POA870 | P0AEX9 | talb_ecoli | male_ecoli |



|        |            |   |        |        |            |            |
|--------|------------|---|--------|--------|------------|------------|
| POA9T4 | TAS_ECOLI  | * | POA9T4 | P0A6F5 | tas_ecoli  | ch60_ecoli |
| POA9T4 | TAS_ECOLI  | * | POA9T4 | P31678 | tas_ecoli  | otsb_ecoli |
| P69428 | TATA_ECOLI |   | none   |        |            |            |
| POAGL2 | TDCF_ECOLI |   | none   |        |            |            |
| P07913 | TDH_ECOLI  | * | P07913 | P0A6F5 | tdh_ecoli  | ch60_ecoli |
| P07913 | TDH_ECOLI  | * | P07913 | P06846 | tdh_ecoli  | ebgr_ecoli |
| P07913 | TDH_ECOLI  | * | P07913 | P18843 | tdh_ecoli  | nade_ecoli |
| P25397 | TEHB_ECOLI | * | P25397 | P0A6F5 | tehb_ecoli | ch60_ecoli |
| P25397 | TEHB_ECOLI | * | P25397 | P33940 | tehb_ecoli | mgo_ecoli  |
| P25397 | TEHB_ECOLI | * | P25397 | P60422 | tehb_ecoli | rl2_ecoli  |
| P25397 | TEHB_ECOLI | * | P25397 | P0ADK8 | tehb_ecoli | yibl_ecoli |
| POAGG2 | TESB_ECOLI | * | POAGG2 | P03960 | tesb_ecoli | atkb_ecoli |
| POAGG2 | TESB_ECOLI | * | POAGG2 | P00722 | tesb_ecoli | bga1_ecoli |
| POAGG2 | TESB_ECOLI | * | POAGG2 | P0A6Y8 | tesb_ecoli | dnak_ecoli |
| POAGG2 | TESB_ECOLI | * | POAGG2 | P18843 | tesb_ecoli | nade_ecoli |
| POAGG2 | TESB_ECOLI | * | POAGG2 | P0AG90 | tesb_ecoli | secd_ecoli |
| POA847 | TGT_ECOLI  | * | POA847 | P37653 | tgt_ecoli  | bcsa_ecoli |
| POA847 | TGT_ECOLI  | * | POA847 | P0A6F5 | tgt_ecoli  | ch60_ecoli |
| POA847 | TGT_ECOLI  | * | POA847 | P0ACF0 | tgt_ecoli  | dbha_ecoli |
| POA847 | TGT_ECOLI  | * | POA847 | P0ACF4 | tgt_ecoli  | dbhb_ecoli |
| POA847 | TGT_ECOLI  | * | POA847 | P0A9P6 | tgt_ecoli  | dead_ecoli |
| POA847 | TGT_ECOLI  | * | POA847 | P75969 | tgt_ecoli  | inte_ecoli |
| POA847 | TGT_ECOLI  | * | POA847 | P08997 | tgt_ecoli  | masy_ecoli |
| POA847 | TGT_ECOLI  | * | POA847 | P18843 | tgt_ecoli  | nade_ecoli |
| POA847 | TGT_ECOLI  | * | POA847 | P0AFG8 | tgt_ecoli  | odp1_ecoli |
| POA847 | TGT_ECOLI  | * | POA847 | P06959 | tgt_ecoli  | odp2_ecoli |
| POA847 | TGT_ECOLI  | * | POA847 | P0A7L0 | tgt_ecoli  | rl1_ecoli  |
| POA847 | TGT_ECOLI  | * | POA847 | P0AA10 | tgt_ecoli  | rl13_ecoli |
| POA847 | TGT_ECOLI  | * | POA847 | P0AG44 | tgt_ecoli  | rl17_ecoli |
| POA847 | TGT_ECOLI  | * | POA847 | P0A7K6 | tgt_ecoli  | rl19_ecoli |
| POA847 | TGT_ECOLI  | * | POA847 | P60422 | tgt_ecoli  | rl2_ecoli  |
| POA847 | TGT_ECOLI  | * | POA847 | P60422 | tgt_ecoli  | rl2_ecoli  |
| POA847 | TGT_ECOLI  | * | POA847 | P0A7L3 | tgt_ecoli  | rl20_ecoli |
| POA847 | TGT_ECOLI  | * | POA847 | P0AG48 | tgt_ecoli  | rl21_ecoli |
| POA847 | TGT_ECOLI  | * | POA847 | P61175 | tgt_ecoli  | rl22_ecoli |
| POA847 | TGT_ECOLI  | * | POA847 | P60624 | tgt_ecoli  | rl24_ecoli |
| POA847 | TGT_ECOLI  | * | POA847 | P0A7M2 | tgt_ecoli  | rl28_ecoli |
| POA847 | TGT_ECOLI  | * | POA847 | P60438 | tgt_ecoli  | rl3_ecoli  |
| POA847 | TGT_ECOLI  | * | POA847 | P60723 | tgt_ecoli  | rl4_ecoli  |

|        |            |   |        |        |                            |                             |
|--------|------------|---|--------|--------|----------------------------|-----------------------------|
| P0A847 | TGT_ECOLI  | * | P0A847 | P0A7K2 | <a href="#">tgt_ecoli</a>  | <a href="#">rl7_ecoli</a>   |
| P0A847 | TGT_ECOLI  | * | P0A847 | P0A7R1 | <a href="#">tgt_ecoli</a>  | <a href="#">rl9_ecoli</a>   |
| P0A847 | TGT_ECOLI  | * | P0A847 | P0A7R1 | <a href="#">tgt_ecoli</a>  | <a href="#">rl9_ecoli</a>   |
| P0A847 | TGT_ECOLI  | * | P0A847 | P75864 | <a href="#">tgt_ecoli</a>  | <a href="#">rlml_ecoli</a>  |
| P0A847 | TGT_ECOLI  | * | P0A847 | P37765 | <a href="#">tgt_ecoli</a>  | <a href="#">rlub_ecoli</a>  |
| P0A847 | TGT_ECOLI  | * | P0A847 | P0A8V2 | <a href="#">tgt_ecoli</a>  | <a href="#">rpob_ecoli</a>  |
| P0A847 | TGT_ECOLI  | * | P0A847 | P0AG67 | <a href="#">tgt_ecoli</a>  | <a href="#">rs1_ecoli</a>   |
| P0A847 | TGT_ECOLI  | * | P0A847 | P0A7S3 | <a href="#">tgt_ecoli</a>  | <a href="#">rs12_ecoli</a>  |
| P0A847 | TGT_ECOLI  | * | P0A847 | P0AG59 | <a href="#">tgt_ecoli</a>  | <a href="#">rs14_ecoli</a>  |
| P0A847 | TGT_ECOLI  | * | P0A847 | P0A7W1 | <a href="#">tgt_ecoli</a>  | <a href="#">rs5_ecoli</a>   |
| P0A847 | TGT_ECOLI  | * | P0A847 | P02359 | <a href="#">tgt_ecoli</a>  | <a href="#">rs7_ecoli</a>   |
| P0A847 | TGT_ECOLI  | * | P0A847 | P0A832 | <a href="#">tgt_ecoli</a>  | <a href="#">ssrp_ecoli</a>  |
| P0A847 | TGT_ECOLI  | * | P0A847 | P0AGJ5 | <a href="#">tgt_ecoli</a>  | <a href="#">yfif_ecoli</a>  |
| P0A847 | TGT_ECOLI  | * | P0A847 | P0AGJ5 | <a href="#">tgt_ecoli</a>  | <a href="#">yfif_ecoli</a>  |
|        |            |   |        |        |                            |                             |
| P07464 | THGA_ECOLI | * | P07464 | P0A6Y8 | <a href="#">thga_ecoli</a> | <a href="#">dnak_ecoli</a>  |
| P07464 | THGA_ECOLI | * | P07464 | P0A717 | <a href="#">thga_ecoli</a> | <a href="#">kprs_ecoli</a>  |
|        |            |   |        |        |                            |                             |
| P77718 | THII_ECOLI | * | P77718 | P22731 | <a href="#">thii_ecoli</a> | <a href="#">livf_ecoli</a>  |
| P77718 | THII_ECOLI | * | P77718 | P0A7L0 | <a href="#">thii_ecoli</a> | <a href="#">rl1_ecoli</a>   |
| P77718 | THII_ECOLI | * | P77718 | P60422 | <a href="#">thii_ecoli</a> | <a href="#">rl2_ecoli</a>   |
|        |            |   |        |        |                            |                             |
| Q46948 | THIJ_ECOLI |   | none   |        |                            |                             |
|        |            |   |        |        |                            |                             |
| P75948 | THIK_ECOLI | * | P75948 | P0A6F5 | <a href="#">thik_ecoli</a> | <a href="#">ch60_ecoli</a>  |
| P75948 | THIK_ECOLI | * | P75948 | P45395 | <a href="#">thik_ecoli</a> | <a href="#">kdsd_ecoli</a>  |
| P75948 | THIK_ECOLI | * | P75948 | P0A7J0 | <a href="#">thik_ecoli</a> | <a href="#">ribb_ecoli</a>  |
| P75948 | THIK_ECOLI | * | P75948 | P0A7V8 | <a href="#">thik_ecoli</a> | <a href="#">rs4_ecoli</a>   |
| P75948 | THIK_ECOLI | * | P75948 | P0A9K9 | <a href="#">thik_ecoli</a> | <a href="#">slyd_ecoli</a>  |
|        |            |   |        |        |                            |                             |
| P0AGG0 | THIL_ECOLI | * | P0AGG0 | P05052 | <a href="#">thil_ecoli</a> | <a href="#">appy_ecoli</a>  |
| P0AGG0 | THIL_ECOLI | * | P0AGG0 | P0A6F5 | <a href="#">thil_ecoli</a> | <a href="#">ch60_ecoli</a>  |
| P0AGG0 | THIL_ECOLI | * | P0AGG0 | P0A972 | <a href="#">thil_ecoli</a> | <a href="#">cspe_ecoli</a>  |
| P0AGG0 | THIL_ECOLI | * | P0AGG0 | P18843 | <a href="#">thil_ecoli</a> | <a href="#">nade_ecoli</a>  |
| P0AGG0 | THIL_ECOLI | * | P0AGG0 | P24173 | <a href="#">thil_ecoli</a> | <a href="#">rfac_ecoli</a>  |
| P0AGG0 | THIL_ECOLI | * | P0AGG0 | P0A7M2 | <a href="#">thil_ecoli</a> | <a href="#">rl28_ecoli</a>  |
| P0AGG0 | THIL_ECOLI | * | P0AGG0 | P0A9K9 | <a href="#">thil_ecoli</a> | <a href="#">slyd_ecoli</a>  |
| P0AGG0 | THIL_ECOLI | * | P0AGG0 | P0A843 | <a href="#">thil_ecoli</a> | <a href="#">tate_ecoli</a>  |
|        |            |   |        |        |                            |                             |
| P0AA25 | THIO_ECOLI | * | P0AA25 | P36683 | <a href="#">thio_ecoli</a> | <a href="#">acon2_ecoli</a> |
| P0AA25 | THIO_ECOLI | * | P0AA25 | P36683 | <a href="#">thio_ecoli</a> | <a href="#">acon2_ecoli</a> |
| P0AA25 | THIO_ECOLI | * | P0AA25 | P36683 | <a href="#">thio_ecoli</a> | <a href="#">acon2_ecoli</a> |
| P0AA25 | THIO_ECOLI | * | P0AA25 | P22333 | <a href="#">thio_ecoli</a> | <a href="#">add_ecoli</a>   |
| P0AA25 | THIO_ECOLI | * | P0AA25 | P39180 | <a href="#">thio_ecoli</a> | <a href="#">ag43_ecoli</a>  |
| P0AA25 | THIO_ECOLI | * | P0AA25 | P0AB71 | <a href="#">thio_ecoli</a> | <a href="#">alf_ecoli</a>   |

|        |            |   |        |        |            |             |
|--------|------------|---|--------|--------|------------|-------------|
| P0AA25 | THIO_ECOLI | * | P0AA25 | P0ABB0 | thio_ecoli | atpa_ecoli  |
| P0AA25 | THIO_ECOLI | * | P0AA25 | P0ABB4 | thio_ecoli | atpb_ecoli  |
| P0AA25 | THIO_ECOLI | * | P0AA25 | P0ABB4 | thio_ecoli | atpb_ecoli  |
| P0AA25 | THIO_ECOLI | * | P0AA25 | P00722 | thio_ecoli | bgal_ecoli  |
| P0AA25 | THIO_ECOLI | * | P0AA25 | P00722 | thio_ecoli | bgal_ecoli  |
| P0AA25 | THIO_ECOLI | * | P0AA25 | P0A6F9 | thio_ecoli | ch10_ecoli  |
| P0AA25 | THIO_ECOLI | * | P0AA25 | P0A6G7 | thio_ecoli | clpp_ecoli  |
| P0AA25 | THIO_ECOLI | * | P0AA25 | P0A9X9 | thio_ecoli | cspa_ecoli  |
| P0AA25 | THIO_ECOLI | * | P0AA25 | P0A9D8 | thio_ecoli | dapd_ecoli  |
| P0AA25 | THIO_ECOLI | * | P0AA25 | P0A9D8 | thio_ecoli | dapd_ecoli  |
| P0AA25 | THIO_ECOLI | * | P0AA25 | P0ACF4 | thio_ecoli | dbhb_ecoli  |
| P0AA25 | THIO_ECOLI | * | P0AA25 | P0AC41 | thio_ecoli | dhsa_ecoli  |
| P0AA25 | THIO_ECOLI | * | P0AA25 | P0ABS1 | thio_ecoli | dksa_ecoli  |
| P0AA25 | THIO_ECOLI | * | P0AA25 | P0A6M8 | thio_ecoli | efg_ecoli   |
| P0AA25 | THIO_ECOLI | * | P0AA25 | P0A6M8 | thio_ecoli | efg_ecoli   |
| P0AA25 | THIO_ECOLI | * | P0AA25 | P0A6N4 | thio_ecoli | efp_ecoli   |
| P0AA25 | THIO_ECOLI | * | P0AA25 | P0A6P1 | thio_ecoli | efts_ecoli  |
| P0AA25 | THIO_ECOLI | * | P0AA25 | P0A6P9 | thio_ecoli | eno_ecoli   |
| P0AA25 | THIO_ECOLI | * | P0AA25 | P0A6P9 | thio_ecoli | eno_ecoli   |
| P0AA25 | THIO_ECOLI | * | P0AA25 | P0A6Q3 | thio_ecoli | faba_ecoli  |
| P0AA25 | THIO_ECOLI | * | P0AA25 | P0A6Q3 | thio_ecoli | faba_ecoli  |
| P0AA25 | THIO_ECOLI | * | P0AA25 | P0AEK2 | thio_ecoli | fabg_ecoli  |
| P0AA25 | THIO_ECOLI | * | P0AA25 | P0AEK4 | thio_ecoli | fabi_ecoli  |
| P0AA25 | THIO_ECOLI | * | P0AA25 | P0A6Q6 | thio_ecoli | fabz_ecoli  |
| P0AA25 | THIO_ECOLI | * | P0AA25 | P21177 | thio_ecoli | fadb_ecoli  |
| P0AA25 | THIO_ECOLI | * | P0AA25 | P32176 | thio_ecoli | fdog_ecoli  |
| P0AA25 | THIO_ECOLI | * | P0AA25 | P0A9L3 | thio_ecoli | fkbb_ecoli  |
| P0AA25 | THIO_ECOLI | * | P0AA25 | P0A9A6 | thio_ecoli | ftsz_ecoli  |
| P0AA25 | THIO_ECOLI | * | P0AA25 | P0A9A9 | thio_ecoli | fur_ecoli   |
| P0AA25 | THIO_ECOLI | * | P0AA25 | P0A9B2 | thio_ecoli | g3p1_ecoli  |
| P0AA25 | THIO_ECOLI | * | P0AA25 | P0A9B2 | thio_ecoli | g3p1_ecoli  |
| P0AA25 | THIO_ECOLI | * | P0AA25 | P31120 | thio_ecoli | gImm_ecoli  |
| P0AA25 | THIO_ECOLI | * | P0AA25 | P0ACC7 | thio_ecoli | gImu_ecoli  |
| P0AA25 | THIO_ECOLI | * | P0AA25 | P0A6H5 | thio_ecoli | hslu_ecoli  |
| P0AA25 | THIO_ECOLI | * | P0AA25 | P0A6H5 | thio_ecoli | hslu_ecoli  |
| P0AA25 | THIO_ECOLI | * | P0AA25 | P0A6Z3 | thio_ecoli | htpg_ecoli  |
| P0AA25 | THIO_ECOLI | * | P0AA25 | P0A6Z3 | thio_ecoli | htpg_ecoli  |
| P0AA25 | THIO_ECOLI | * | P0AA25 | P08200 | thio_ecoli | idh_ecoli   |
| P0AA25 | THIO_ECOLI | * | P0AA25 | P08200 | thio_ecoli | idh_ecoli   |
| P0AA25 | THIO_ECOLI | * | P0AA25 | P13029 | thio_ecoli | katg_ecoli  |
| P0AA25 | THIO_ECOLI | * | P0AA25 | P23331 | thio_ecoli | kith_ecoli  |
| P0AA25 | THIO_ECOLI | * | P0AA25 | P21599 | thio_ecoli | kpyk2_ecoli |
| P0AA25 | THIO_ECOLI | * | P0AA25 | P02943 | thio_ecoli | lamb_ecoli  |
| P0AA25 | THIO_ECOLI | * | P0AA25 | P0A9V1 | thio_ecoli | lptb_ecoli  |
| P0AA25 | THIO_ECOLI | * | P0AA25 | P0AEX9 | thio_ecoli | male_ecoli  |

|        |            |   |        |        |            |             |
|--------|------------|---|--------|--------|------------|-------------|
| P0AA25 | THIO_ECOLI | * | P0AA25 | P0AAG8 | thio_ecoli | mgla_ecoli  |
| P0AA25 | THIO_ECOLI | * | P0AA25 | P0AAG8 | thio_ecoli | mgla_ecoli  |
| P0AA25 | THIO_ECOLI | * | P0AA25 | P33940 | thio_ecoli | mgo_ecoli   |
| P0AA25 | THIO_ECOLI | * | P0AA25 | P33940 | thio_ecoli | mgo_ecoli   |
| P0AA25 | THIO_ECOLI | * | P0AA25 | P0A9X4 | thio_ecoli | mreb_ecoli  |
| P0AA25 | THIO_ECOLI | * | P0AA25 | P0A763 | thio_ecoli | ndk_ecoli   |
| P0AA25 | THIO_ECOLI | * | P0AA25 | P28903 | thio_ecoli | nrdd_ecoli  |
| P0AA25 | THIO_ECOLI | * | P0AA25 | P0A8D0 | thio_ecoli | nrdr_ecoli  |
| P0AA25 | THIO_ECOLI | * | P0AA25 | P0AFG0 | thio_ecoli | nusg_ecoli  |
| P0AA25 | THIO_ECOLI | * | P0AA25 | P0AFG0 | thio_ecoli | nusg_ecoli  |
| P0AA25 | THIO_ECOLI | * | P0AA25 | P42641 | thio_ecoli | obg_ecoli   |
| P0AA25 | THIO_ECOLI | * | P0AA25 | P0A910 | thio_ecoli | ompa_ecoli  |
| P0AA25 | THIO_ECOLI | * | P0AA25 | P06996 | thio_ecoli | ompc_ecoli  |
| P0AA25 | THIO_ECOLI | * | P0AA25 | P02931 | thio_ecoli | ompf_ecoli  |
| P0AA25 | THIO_ECOLI | * | P0AA25 | P0AA16 | thio_ecoli | ompr_ecoli  |
| P0AA25 | THIO_ECOLI | * | P0AA25 | P23865 | thio_ecoli | prc_ecoli   |
| P0AA25 | THIO_ECOLI | * | P0AA25 | P69783 | thio_ecoli | ptga_ecoli  |
| P0AA25 | THIO_ECOLI | * | P0AA25 | P69783 | thio_ecoli | ptga_ecoli  |
| P0AA25 | THIO_ECOLI | * | P0AA25 | P09546 | thio_ecoli | puta_ecoli  |
| P0AA25 | THIO_ECOLI | * | P0AA25 | P0A7E9 | thio_ecoli | pyrh_ecoli  |
| P0AA25 | THIO_ECOLI | * | P0AA25 | P02925 | thio_ecoli | rbsb_ecoli  |
| P0AA25 | THIO_ECOLI | * | P0AA25 | P69407 | thio_ecoli | rbsb_ecoli  |
| P0AA25 | THIO_ECOLI | * | P0AA25 | P69407 | thio_ecoli | rbsb_ecoli  |
| P0AA25 | THIO_ECOLI | * | P0AA25 | P0A7G6 | thio_ecoli | reca_ecoli  |
| P0AA25 | THIO_ECOLI | * | P0AA25 | P0A7G6 | thio_ecoli | reca_ecoli  |
| P0AA25 | THIO_ECOLI | * | P0AA25 | P00452 | thio_ecoli | rir1_ecoli  |
| P0AA25 | THIO_ECOLI | * | P0AA25 | P0A800 | thio_ecoli | rpoz_ecoli  |
| P0AA25 | THIO_ECOLI | * | P0AA25 | P0A800 | thio_ecoli | rpoz_ecoli  |
| P0AA25 | THIO_ECOLI | * | P0AA25 | P30744 | thio_ecoli | sdhm_ecoli  |
| P0AA25 | THIO_ECOLI | * | P0AA25 | P0A9K9 | thio_ecoli | slyd_ecoli  |
| P0AA25 | THIO_ECOLI | * | P0AA25 | P0A9K9 | thio_ecoli | slyd_ecoli  |
| P0AA25 | THIO_ECOLI | * | P0AA25 | P00448 | thio_ecoli | sodm_ecoli  |
| P0AA25 | THIO_ECOLI | * | P0AA25 | P0AGD7 | thio_ecoli | srp54_ecoli |
| P0AA25 | THIO_ECOLI | * | P0AA25 | P0AGD7 | thio_ecoli | srp54_ecoli |
| P0AA25 | THIO_ECOLI | * | P0AA25 | P27306 | thio_ecoli | stha_ecoli  |
| P0AA25 | THIO_ECOLI | * | P0AA25 | P27306 | thio_ecoli | stha_ecoli  |
| P0AA25 | THIO_ECOLI | * | P0AA25 | P0A836 | thio_ecoli | succ_ecoli  |
| P0AA25 | THIO_ECOLI | * | P0AA25 | P0A836 | thio_ecoli | succ_ecoli  |
| P0AA25 | THIO_ECOLI | * | P0AA25 | P0AGE9 | thio_ecoli | sucd_ecoli  |
| P0AA25 | THIO_ECOLI | * | P0AA25 | P0AGE9 | thio_ecoli | sucd_ecoli  |
| P0AA25 | THIO_ECOLI | * | P0AA25 | P0A870 | thio_ecoli | talb_ecoli  |
| P0AA25 | THIO_ECOLI | * | P0AA25 | P0A853 | thio_ecoli | tnaa_ecoli  |
| P0AA25 | THIO_ECOLI | * | P0AA25 | P0A858 | thio_ecoli | tpis_ecoli  |
| P0AA25 | THIO_ECOLI | * | P0AA25 | P0A862 | thio_ecoli | tpx_ecoli   |
| P0AA25 | THIO_ECOLI | * | P0AA25 | P0A9P4 | thio_ecoli | trxb_ecoli  |

|        |            |      |        |        |            |             |
|--------|------------|------|--------|--------|------------|-------------|
| POAA25 | THIO_ECOLI | *    | POAA25 | POA887 | thio_ecoli | ubie_ecoli  |
| POAA25 | THIO_ECOLI | *    | POAA25 | P12758 | thio_ecoli | udp_ecoli   |
| POAA25 | THIO_ECOLI | *    | POAA25 | POA8E7 | thio_ecoli | yajq_ecoli  |
| POAA25 | THIO_ECOLI | *    | POAA25 | POA8E7 | thio_ecoli | yajq_ecoli  |
| POAA25 | THIO_ECOLI | *    | POAA25 | POA8J4 | thio_ecoli | ybed_ecoli  |
| POAA25 | THIO_ECOLI | *    | POAA25 | POA8J4 | thio_ecoli | ybed_ecoli  |
| POAA25 | THIO_ECOLI | *    | POAA25 | POACY1 | thio_ecoli | ydja_ecoli  |
| POAA25 | THIO_ECOLI | *    | POAA25 | P33218 | thio_ecoli | yebe_ecoli  |
| POAA25 | THIO_ECOLI | *    | POAA25 | P24203 | thio_ecoli | yjia_ecoli  |
| POAA25 | THIO_ECOLI | *    | POAA25 | P77475 | thio_ecoli | yqab_ecoli  |
| P00934 | THRC_ECOLI | *    | P00934 | POA6M8 | thrc_ecoli | efg_ecoli   |
| P31142 | THTM_ECOLI | none |        |        |            |             |
| Q9XD84 | TIBA_ECOLX | none |        |        |            |             |
| POA850 | TIG_ECOLI  | *    | POA850 | P31441 | tig_ecoli  | adec_ecoli  |
| POA850 | TIG_ECOLI  | *    | POA850 | P00561 | tig_ecoli  | ak1h_ecoli  |
| POA850 | TIG_ECOLI  | *    | POA850 | P18335 | tig_ecoli  | argd_ecoli  |
| POA850 | TIG_ECOLI  | *    | POA850 | P22106 | tig_ecoli  | asnb_ecoli  |
| POA850 | TIG_ECOLI  | *    | POA850 | POAC38 | tig_ecoli  | aspa_ecoli  |
| POA850 | TIG_ECOLI  | *    | POA850 | P09053 | tig_ecoli  | avta_ecoli  |
| POA850 | TIG_ECOLI  | *    | POA850 | P00722 | tig_ecoli  | bgal_ecoli  |
| POA850 | TIG_ECOLI  | *    | POA850 | POA6F1 | tig_ecoli  | cara_ecoli  |
| POA850 | TIG_ECOLI  | *    | POA850 | P00968 | tig_ecoli  | carb_ecoli  |
| POA850 | TIG_ECOLI  | *    | POA850 | P36659 | tig_ecoli  | cbpa_ecoli  |
| POA850 | TIG_ECOLI  | *    | POA850 | POA6J5 | tig_ecoli  | dada_ecoli  |
| POA850 | TIG_ECOLI  | *    | POA850 | P00861 | tig_ecoli  | dcda_ecoli  |
| POA850 | TIG_ECOLI  | *    | POA850 | POAC41 | tig_ecoli  | dhsa_ecoli  |
| POA850 | TIG_ECOLI  | *    | POA850 | POAC41 | tig_ecoli  | dhsa_ecoli  |
| POA850 | TIG_ECOLI  | *    | POA850 | P07014 | tig_ecoli  | dhsb_ecoli  |
| POA850 | TIG_ECOLI  | *    | POA850 | POA6Q3 | tig_ecoli  | faba_ecoli  |
| POA850 | TIG_ECOLI  | *    | POA850 | P21177 | tig_ecoli  | fadb_ecoli  |
| POA850 | TIG_ECOLI  | *    | POA850 | POABY2 | tig_ecoli  | flit_ecoli  |
| POA850 | TIG_ECOLI  | *    | POA850 | P05523 | tig_ecoli  | fpg_ecoli   |
| POA850 | TIG_ECOLI  | *    | POA850 | POACP1 | tig_ecoli  | frur_ecoli  |
| POA850 | TIG_ECOLI  | *    | POA850 | POA998 | tig_ecoli  | ftna_ecoli  |
| POA850 | TIG_ECOLI  | *    | POA850 | POAAI3 | tig_ecoli  | ftsh_ecoli  |
| POA850 | TIG_ECOLI  | *    | POA850 | POA9B2 | tig_ecoli  | g3p1_ecoli  |
| POA850 | TIG_ECOLI  | *    | POA850 | POA9S3 | tig_ecoli  | gatd_ecoli  |
| POA850 | TIG_ECOLI  | *    | POA850 | POC8J8 | tig_ecoli  | gatz_ecoli  |
| POA850 | TIG_ECOLI  | *    | POA850 | POA9S5 | tig_ecoli  | glda_ecoli  |
| POA850 | TIG_ECOLI  | *    | POA850 | POA6V8 | tig_ecoli  | glk_ecoli   |
| POA850 | TIG_ECOLI  | *    | POA850 | POAER3 | tig_ecoli  | gl tj_ecoli |

|        |           |   |        |        |           |            |
|--------|-----------|---|--------|--------|-----------|------------|
| POA850 | TIG_ECOLI | * | POA850 | P06987 | tig_ecoli | his7_ecoli |
| POA850 | TIG_ECOLI | * | POA850 | P0A6Z3 | tig_ecoli | htpg_ecoli |
| POA850 | TIG_ECOLI | * | POA850 | Q46893 | tig_ecoli | ispd_ecoli |
| POA850 | TIG_ECOLI | * | POA850 | P69441 | tig_ecoli | kad_ecoli  |
| POA850 | TIG_ECOLI | * | POA850 | P23331 | tig_ecoli | kith_ecoli |
| POA850 | TIG_ECOLI | * | POA850 | P45578 | tig_ecoli | luxs_ecoli |
| POA850 | TIG_ECOLI | * | POA850 | P77791 | tig_ecoli | maa_ecoli  |
| POA850 | TIG_ECOLI | * | POA850 | P69741 | tig_ecoli | mbht_ecoli |
| POA850 | TIG_ECOLI | * | POA850 | P0A9X4 | tig_ecoli | mreb_ecoli |
| POA850 | TIG_ECOLI | * | POA850 | P18843 | tig_ecoli | nade_ecoli |
| POA850 | TIG_ECOLI | * | POA850 | P45425 | tig_ecoli | nank_ecoli |
| POA850 | TIG_ECOLI | * | POA850 | P19318 | tig_ecoli | nary_ecoli |
| POA850 | TIG_ECOLI | * | POA850 | P19319 | tig_ecoli | narz_ecoli |
| POA850 | TIG_ECOLI | * | POA850 | P32664 | tig_ecoli | nudc_ecoli |
| POA850 | TIG_ECOLI | * | POA850 | P0AFD1 | tig_ecoli | nuoe_ecoli |
| POA850 | TIG_ECOLI | * | POA850 | P0AFG6 | tig_ecoli | odo2_ecoli |
| POA850 | TIG_ECOLI | * | POA850 | P0AFG8 | tig_ecoli | odp1_ecoli |
| POA850 | TIG_ECOLI | * | POA850 | P0A910 | tig_ecoli | ompa_ecoli |
| POA850 | TIG_ECOLI | * | POA850 | P0A910 | tig_ecoli | ompa_ecoli |
| POA850 | TIG_ECOLI | * | POA850 | P02931 | tig_ecoli | ompf_ecoli |
| POA850 | TIG_ECOLI | * | POA850 | P33136 | tig_ecoli | opgg_ecoli |
| POA850 | TIG_ECOLI | * | POA850 | P0AFI7 | tig_ecoli | pdxh_ecoli |
| POA850 | TIG_ECOLI | * | POA850 | P09373 | tig_ecoli | pflb_ecoli |
| POA850 | TIG_ECOLI | * | POA850 | P23538 | tig_ecoli | ppsa_ecoli |
| POA850 | TIG_ECOLI | * | POA850 | P0AG82 | tig_ecoli | psts_ecoli |
| POA850 | TIG_ECOLI | * | POA850 | P69828 | tig_ecoli | ptka_ecoli |
| POA850 | TIG_ECOLI | * | POA850 | P09546 | tig_ecoli | puta_ecoli |
| POA850 | TIG_ECOLI | * | POA850 | P0AG30 | tig_ecoli | rho_ecoli  |
| POA850 | TIG_ECOLI | * | POA850 | P16918 | tig_ecoli | rhsc_ecoli |
| POA850 | TIG_ECOLI | * | POA850 | P16919 | tig_ecoli | rhsd_ecoli |
| POA850 | TIG_ECOLI | * | POA850 | P0A7L0 | tig_ecoli | rl1_ecoli  |
| POA850 | TIG_ECOLI | * | POA850 | P0A7J3 | tig_ecoli | rl10_ecoli |
| POA850 | TIG_ECOLI | * | POA850 | P0AA10 | tig_ecoli | rl13_ecoli |
| POA850 | TIG_ECOLI | * | POA850 | P0ADY3 | tig_ecoli | rl14_ecoli |
| POA850 | TIG_ECOLI | * | POA850 | P0ADY3 | tig_ecoli | rl14_ecoli |
| POA850 | TIG_ECOLI | * | POA850 | P02413 | tig_ecoli | rl15_ecoli |
| POA850 | TIG_ECOLI | * | POA850 | P0ADY7 | tig_ecoli | rl16_ecoli |
| POA850 | TIG_ECOLI | * | POA850 | P0AG44 | tig_ecoli | rl17_ecoli |
| POA850 | TIG_ECOLI | * | POA850 | P60422 | tig_ecoli | rl2_ecoli  |
| POA850 | TIG_ECOLI | * | POA850 | P61175 | tig_ecoli | rl22_ecoli |
| POA850 | TIG_ECOLI | * | POA850 | P0ADZ0 | tig_ecoli | rl23_ecoli |
| POA850 | TIG_ECOLI | * | POA850 | P0A7M2 | tig_ecoli | rl28_ecoli |
| POA850 | TIG_ECOLI | * | POA850 | P0A7M2 | tig_ecoli | rl28_ecoli |
| POA850 | TIG_ECOLI | * | POA850 | P0A7M6 | tig_ecoli | rl29_ecoli |
| POA850 | TIG_ECOLI | * | POA850 | P60438 | tig_ecoli | rl3_ecoli  |



|        |           |   |        |        |           |            |
|--------|-----------|---|--------|--------|-----------|------------|
| POA850 | TIG_ECOLI | * | POA850 | P60438 | tig_ecoli | rl3_ecoli  |
| POA850 | TIG_ECOLI | * | POA850 | P60723 | tig_ecoli | rl4_ecoli  |
| POA850 | TIG_ECOLI | * | POA850 | P60723 | tig_ecoli | rl4_ecoli  |
| POA850 | TIG_ECOLI | * | POA850 | P62399 | tig_ecoli | rl5_ecoli  |
| POA850 | TIG_ECOLI | * | POA850 | P0AG55 | tig_ecoli | rl6_ecoli  |
| POA850 | TIG_ECOLI | * | POA850 | P0AG55 | tig_ecoli | rl6_ecoli  |
| POA850 | TIG_ECOLI | * | POA850 | P0A7K2 | tig_ecoli | rl7_ecoli  |
| POA850 | TIG_ECOLI | * | POA850 | P0A7Y0 | tig_ecoli | rnc_ecoli  |
| POA850 | TIG_ECOLI | * | POA850 | P0A8V2 | tig_ecoli | rpob_ecoli |
| POA850 | TIG_ECOLI | * | POA850 | P0A8T7 | tig_ecoli | rpoc_ecoli |
| POA850 | TIG_ECOLI | * | POA850 | P0AG67 | tig_ecoli | rs1_ecoli  |
| POA850 | TIG_ECOLI | * | POA850 | P0AG67 | tig_ecoli | rs1_ecoli  |
| POA850 | TIG_ECOLI | * | POA850 | P0A7R5 | tig_ecoli | rs10_ecoli |
| POA850 | TIG_ECOLI | * | POA850 | P0A7R9 | tig_ecoli | rs11_ecoli |
| POA850 | TIG_ECOLI | * | POA850 | P0AG59 | tig_ecoli | rs14_ecoli |
| POA850 | TIG_ECOLI | * | POA850 | P0A7U3 | tig_ecoli | rs19_ecoli |
| POA850 | TIG_ECOLI | * | POA850 | P0A7V0 | tig_ecoli | rs2_ecoli  |
| POA850 | TIG_ECOLI | * | POA850 | P0A7V0 | tig_ecoli | rs2_ecoli  |
| POA850 | TIG_ECOLI | * | POA850 | P68679 | tig_ecoli | rs21_ecoli |
| POA850 | TIG_ECOLI | * | POA850 | P68679 | tig_ecoli | rs21_ecoli |
| POA850 | TIG_ECOLI | * | POA850 | P0A7V3 | tig_ecoli | rs3_ecoli  |
| POA850 | TIG_ECOLI | * | POA850 | P0A7V3 | tig_ecoli | rs3_ecoli  |
| POA850 | TIG_ECOLI | * | POA850 | P0A7V8 | tig_ecoli | rs4_ecoli  |
| POA850 | TIG_ECOLI | * | POA850 | P0A7W1 | tig_ecoli | rs5_ecoli  |
| POA850 | TIG_ECOLI | * | POA850 | P0A7W1 | tig_ecoli | rs5_ecoli  |
| POA850 | TIG_ECOLI | * | POA850 | P0A7W1 | tig_ecoli | rs5_ecoli  |
| POA850 | TIG_ECOLI | * | POA850 | P02359 | tig_ecoli | rs7_ecoli  |
| POA850 | TIG_ECOLI | * | POA850 | P02359 | tig_ecoli | rs7_ecoli  |
| POA850 | TIG_ECOLI | * | POA850 | P0A7X3 | tig_ecoli | rs9_ecoli  |
| POA850 | TIG_ECOLI | * | POA850 | P0A7X3 | tig_ecoli | rs9_ecoli  |
| POA850 | TIG_ECOLI | * | POA850 | P38104 | tig_ecoli | rspa_ecoli |
| POA850 | TIG_ECOLI | * | POA850 | P0A9K9 | tig_ecoli | slyd_ecoli |
| POA850 | TIG_ECOLI | * | POA850 | P0ACQ7 | tig_ecoli | tdca_ecoli |
| POA850 | TIG_ECOLI | * | POA850 | P07464 | tig_ecoli | thga_ecoli |
| POA850 | TIG_ECOLI | * | POA850 | P06612 | tig_ecoli | top1_ecoli |
| POA850 | TIG_ECOLI | * | POA850 | P23003 | tig_ecoli | trma_ecoli |
| POA850 | TIG_ECOLI | * | POA850 | P0A698 | tig_ecoli | uvra_ecoli |
| POA850 | TIG_ECOLI | * | POA850 | P0A6L7 | tig_ecoli | uxab_ecoli |
| POA850 | TIG_ECOLI | * | POA850 | P0AB43 | tig_ecoli | ycgl_ecoli |
| POA850 | TIG_ECOLI | * | POA850 | P76464 | tig_ecoli | yfas_ecoli |
| POA850 | TIG_ECOLI | * | POA850 | P0AGJ5 | tig_ecoli | yfif_ecoli |
| POA850 | TIG_ECOLI | * | POA850 | Q47319 | tig_ecoli | yfip_ecoli |
| POA850 | TIG_ECOLI | * | POA850 | P0ADQ2 | tig_ecoli | yiid_ecoli |
| POA850 | TIG_ECOLI | * | POA850 | P39280 | tig_ecoli | yjek_ecoli |
| POA850 | TIG_ECOLI | * | POA850 | P76149 | tig_ecoli | ynei_ecoli |

|                    |                          |   |        |        |            |            |
|--------------------|--------------------------|---|--------|--------|------------|------------|
| P0A850             | TIG_ECOLI                | * | P0A850 | P76208 | tig_ecoli  | ynib_ecoli |
| P27302             | TKT1_ECOLI               |   | none   |        |            |            |
| Q46731<br>Q46731-2 | TN5P_ECOLX<br>TN5P_ECOLX |   | none   |        |            |            |
| P0A853             | TNAA_ECOLI               | * | P0A853 | P0A6Y8 | tnaa_ecoli | dnak_ecoli |
| P13694             | TNP7_ECOLX               |   | none   |        |            |            |
| P0A855             | TOLB_ECOLI               |   | none   |        |            |            |
| P06612             | TOP1_ECOLI               | * | P06612 | P0ACF0 | top1_ecoli | dbha_ecoli |
| P06612             | TOP1_ECOLI               | * | P06612 | P0ACF4 | top1_ecoli | dbhb_ecoli |
| P06612             | TOP1_ECOLI               | * | P06612 | P0A9P0 | top1_ecoli | dldh_ecoli |
| P06612             | TOP1_ECOLI               | * | P06612 | P75933 | top1_ecoli | flga_ecoli |
| P06612             | TOP1_ECOLI               | * | P06612 | P25527 | top1_ecoli | gabp_ecoli |
| P06612             | TOP1_ECOLI               | * | P06612 | P0A6X3 | top1_ecoli | hfq_ecoli  |
| P06612             | TOP1_ECOLI               | * | P06612 | P0ACF8 | top1_ecoli | hns_ecoli  |
| P06612             | TOP1_ECOLI               | * | P06612 | P37647 | top1_ecoli | kdgk_ecoli |
| P06612             | TOP1_ECOLI               | * | P06612 | P75830 | top1_ecoli | maca_ecoli |
| P06612             | TOP1_ECOLI               | * | P06612 | P00490 | top1_ecoli | phsm_ecoli |
| P06612             | TOP1_ECOLI               | * | P06612 | P23830 | top1_ecoli | pss_ecoli  |
| P06612             | TOP1_ECOLI               | * | P06612 | P21893 | top1_ecoli | recj_ecoli |
| P06612             | TOP1_ECOLI               | * | P06612 | P15043 | top1_ecoli | recq_ecoli |
| P06612             | TOP1_ECOLI               | * | P06612 | P27243 | top1_ecoli | rfal_ecoli |
| P06612             | TOP1_ECOLI               | * | P06612 | P0A948 | top1_ecoli | rimj_ecoli |
| P06612             | TOP1_ECOLI               | * | P06612 | P37765 | top1_ecoli | rlub_ecoli |
| P06612             | TOP1_ECOLI               | * | P06612 | P0ACI0 | top1_ecoli | rob_ecoli  |
| P06612             | TOP1_ECOLI               | * | P06612 | P0A7Z4 | top1_ecoli | rpoa_ecoli |
| P06612             | TOP1_ECOLI               | * | P06612 | P0A8V2 | top1_ecoli | rpob_ecoli |
| P06612             | TOP1_ECOLI               | * | P06612 | P0A8T7 | top1_ecoli | rpoc_ecoli |
| P06612             | TOP1_ECOLI               | * | P06612 | P0A8T7 | top1_ecoli | rpoc_ecoli |
| P06612             | TOP1_ECOLI               | * | P06612 | P0AGB6 | top1_ecoli | rpoe_ecoli |
| P06612             | TOP1_ECOLI               | * | P06612 | P0A800 | top1_ecoli | rpoz_ecoli |
| P06612             | TOP1_ECOLI               | * | P06612 | P52108 | top1_ecoli | rsta_ecoli |
| P06612             | TOP1_ECOLI               | * | P06612 | P21507 | top1_ecoli | srmb_ecoli |
| P06612             | TOP1_ECOLI               | * | P06612 | P00957 | top1_ecoli | sya_ecoli  |
| P06612             | TOP1_ECOLI               | * | P06612 | P07813 | top1_ecoli | syl_ecoli  |
| P06612             | TOP1_ECOLI               | * | P06612 | P0A9U3 | top1_ecoli | ybit_ecoli |
| P06612             | TOP1_ECOLI               | * | P06612 | P0A8Z0 | top1_ecoli | ycia_ecoli |
| P33226             | TORC_ECOLI               |   | none   |        |            |            |

|          |             |          |        |            |             |  |
|----------|-------------|----------|--------|------------|-------------|--|
| P52005   | TORY_ECOLI  | none     |        |            |             |  |
| P0A862   | TPX_ECOLI   | * P0A862 | P0A9F3 | tpx_ecoli  | cysb_ecoli  |  |
| P0A862   | TPX_ECOLI   | * P0A862 | P23524 | tpx_ecoli  | glxk2_ecoli |  |
| P14565   | TRAI1_ECOLI | none     |        |            |             |  |
| P14565-2 | TRAI1_ECOLI |          |        |            |             |  |
| P22706   | TRAI2_ECOLX | none     |        |            |             |  |
| Q00186   | TRAM4_ECOLX | none     |        |            |             |  |
| P71198   | TRAM5_ECOLX | none     |        |            |             |  |
| P24082   | TRAN_ECOLI  | * P13482 | P0A894 | trea_ecoli | yhbj_ecoli  |  |
| P28904   | TREC_ECOLI  | * P28904 | P00968 | trec_ecoli | carb_ecoli  |  |
| P28904   | TREC_ECOLI  | * P28904 | P18843 | trec_ecoli | nade_ecoli  |  |
| P28904   | TREC_ECOLI  | * P28904 | P0AFI7 | trec_ecoli | pdxh_ecoli  |  |
| P28904   | TREC_ECOLI  | * P28904 | P60723 | trec_ecoli | rl4_ecoli   |  |
| P28904   | TREC_ECOLI  | * P28904 | P16659 | trec_ecoli | syp_ecoli   |  |
| P28904   | TREC_ECOLI  | * P28904 | P08956 | trec_ecoli | t1rk_ecoli  |  |
| P28904   | TREC_ECOLI  | * P28904 | Q46844 | trec_ecoli | yght_ecoli  |  |
| P36673   | TRER_ECOLI  | * P36673 | P0A6Y8 | trer_ecoli | dnak_ecoli  |  |
| P36673   | TRER_ECOLI  | * P36673 | P32675 | trer_ecoli | pflc_ecoli  |  |
| P36673   | TRER_ECOLI  | * P36673 | P60422 | trer_ecoli | rl2_ecoli   |  |
| P36673   | TRER_ECOLI  | * P36673 | P0A7X3 | trer_ecoli | rs9_ecoli   |  |
| P36673   | TRER_ECOLI  | * P36673 | P0AB43 | trer_ecoli | ycgl_ecoli  |  |
| P36673   | TRER_ECOLI  | * P36673 | P08245 | trer_ecoli | ycih_ecoli  |  |
| P0A815   | TRMB_ECOLI  | * P0A815 | P0A6F5 | trmb_ecoli | ch60_ecoli  |  |
| P0A815   | TRMB_ECOLI  | * P0A815 | P0A9P6 | trmb_ecoli | dead_ecoli  |  |
| P0A815   | TRMB_ECOLI  | * P0A815 | P0AEE5 | trmb_ecoli | dgal_ecoli  |  |
| P0A815   | TRMB_ECOLI  | * P0A815 | P0A9P0 | trmb_ecoli | dldh_ecoli  |  |
| P0A815   | TRMB_ECOLI  | * P0A815 | P0A6Y8 | trmb_ecoli | dnak_ecoli  |  |
| P0A815   | TRMB_ECOLI  | * P0A815 | P0ABX2 | trmb_ecoli | flgc_ecoli  |  |
| P0A815   | TRMB_ECOLI  | * P0A815 | P0AEM4 | trmb_ecoli | flgm_ecoli  |  |
| P0A815   | TRMB_ECOLI  | * P0A815 | P32662 | trmb_ecoli | gph_ecoli   |  |
| P0A815   | TRMB_ECOLI  | * P0A815 | P43329 | trmb_ecoli | hrpa_ecoli  |  |
| P0A815   | TRMB_ECOLI  | * P0A815 | P0AFG8 | trmb_ecoli | odp1_ecoli  |  |
| P0A815   | TRMB_ECOLI  | * P0A815 | P0A9J8 | trmb_ecoli | phea_ecoli  |  |
| P0A815   | TRMB_ECOLI  | * P0A815 | P0A9K3 | trmb_ecoli | phol_ecoli  |  |
| P0A815   | TRMB_ECOLI  | * P0A815 | P23830 | trmb_ecoli | pss_ecoli   |  |
| P0A815   | TRMB_ECOLI  | * P0A815 | P0A7J3 | trmb_ecoli | rl10_ecoli  |  |

|        |            |   |        |        |            |            |
|--------|------------|---|--------|--------|------------|------------|
| POA815 | TRMB_ECOLI | * | POA815 | P0AA10 | trmb_ecoli | rl13_ecoli |
| POA815 | TRMB_ECOLI | * | POA815 | P0A7K6 | trmb_ecoli | rl19_ecoli |
| POA815 | TRMB_ECOLI | * | POA815 | P60422 | trmb_ecoli | rl2_ecoli  |
| POA815 | TRMB_ECOLI | * | POA815 | P61175 | trmb_ecoli | rl22_ecoli |
| POA815 | TRMB_ECOLI | * | POA815 | P61175 | trmb_ecoli | rl22_ecoli |
| POA815 | TRMB_ECOLI | * | POA815 | P60624 | trmb_ecoli | rl24_ecoli |
| POA815 | TRMB_ECOLI | * | POA815 | P60438 | trmb_ecoli | rl3_ecoli  |
| POA815 | TRMB_ECOLI | * | POA815 | P60723 | trmb_ecoli | rl4_ecoli  |
| POA815 | TRMB_ECOLI | * | POA815 | P62399 | trmb_ecoli | rl5_ecoli  |
| POA815 | TRMB_ECOLI | * | POA815 | P0AG55 | trmb_ecoli | rl6_ecoli  |
| POA815 | TRMB_ECOLI | * | POA815 | P0A7R1 | trmb_ecoli | rl9_ecoli  |
| POA815 | TRMB_ECOLI | * | POA815 | P75864 | trmb_ecoli | rlml_ecoli |
| POA815 | TRMB_ECOLI | * | POA815 | P0AG67 | trmb_ecoli | rs1_ecoli  |
| POA815 | TRMB_ECOLI | * | POA815 | P0A7S9 | trmb_ecoli | rs13_ecoli |
| POA815 | TRMB_ECOLI | * | POA815 | P0A7T3 | trmb_ecoli | rs16_ecoli |
| POA815 | TRMB_ECOLI | * | POA815 | P0A7V0 | trmb_ecoli | rs2_ecoli  |
| POA815 | TRMB_ECOLI | * | POA815 | P0A7U7 | trmb_ecoli | rs20_ecoli |
| POA815 | TRMB_ECOLI | * | POA815 | P68679 | trmb_ecoli | rs21_ecoli |
| POA815 | TRMB_ECOLI | * | POA815 | P0A7V3 | trmb_ecoli | rs3_ecoli  |
| POA815 | TRMB_ECOLI | * | POA815 | P0A7V8 | trmb_ecoli | rs4_ecoli  |
| POA815 | TRMB_ECOLI | * | POA815 | P0A7W1 | trmb_ecoli | rs5_ecoli  |
| POA815 | TRMB_ECOLI | * | POA815 | P02358 | trmb_ecoli | rs6_ecoli  |
| POA815 | TRMB_ECOLI | * | POA815 | P02359 | trmb_ecoli | rs7_ecoli  |
| POA815 | TRMB_ECOLI | * | POA815 | P02359 | trmb_ecoli | rs7_ecoli  |
| POA815 | TRMB_ECOLI | * | POA815 | P21507 | trmb_ecoli | srmb_ecoli |
| POA815 | TRMB_ECOLI | * | POA815 | P00962 | trmb_ecoli | syq_ecoli  |
| POA815 | TRMB_ECOLI | * | POA815 | P0AFQ2 | trmb_ecoli | ybhs_ecoli |
| POA815 | TRMB_ECOLI | * | POA815 | P0AGJ5 | trmb_ecoli | yfif_ecoli |
| POA815 | TRMB_ECOLI | * | POA815 | P30871 | trmb_ecoli | ygif_ecoli |
| POA815 | TRMB_ECOLI | * | POA815 | P76092 | trmb_ecoli | ynbc_ecoli |
| POA815 | TRMB_ECOLI | * | POA815 | P76115 | trmb_ecoli | yncd_ecoli |
| POAGJ2 | TRMH_ECOLI | * | POAGJ2 | P77624 | trmh_ecoli | arcm_ecoli |
| POAGJ2 | TRMH_ECOLI | * | POAGJ2 | P02359 | trmh_ecoli | rs7_ecoli  |
| POAGJ2 | TRMH_ECOLI | * | POAGJ2 | P0A7X3 | trmh_ecoli | rs9_ecoli  |
| POAE01 | TRMJ_ECOLI |   | none   |        |            |            |
| P60340 | TRUB_ECOLI | * | P60340 | P0A7J3 | trub_ecoli | rl10_ecoli |
| P60340 | TRUB_ECOLI | * | P60340 | P02413 | trub_ecoli | rl15_ecoli |
| P60340 | TRUB_ECOLI | * | P60340 | P0AG44 | trub_ecoli | rl17_ecoli |
| P60340 | TRUB_ECOLI | * | P60340 | P60422 | trub_ecoli | rl2_ecoli  |
| P60340 | TRUB_ECOLI | * | P60340 | P52062 | trub_ecoli | yggw_ecoli |
| POA9P4 | TRXB_ECOLI | * | POA9P4 | P18843 | trxb_ecoli | nade_ecoli |

|        |            |          |        |            |             |
|--------|------------|----------|--------|------------|-------------|
| P16525 | TUS_ECOLI  | * P16525 | P0A6F5 | tus_ecoli  | ch60_ecoli  |
| P16525 | TUS_ECOLI  | * P16525 | P0AET8 | tus_ecoli  | hdha_ecoli  |
| P45531 | TUSC_ECOLI | * P45531 | P09557 | tusc_ecoli | dicb_ecoli  |
| P45531 | TUSC_ECOLI | * P45531 | P0ACV6 | tusc_ecoli | mpaa_ecoli  |
| P45531 | TUSC_ECOLI | * P45531 | P76154 | tusc_ecoli | ydfk_ecoli  |
| P45531 | TUSC_ECOLI | * P45531 | P76073 | tusc_ecoli | ynae_ecoli  |
| P32132 | TYPA_ECOLI | none     |        |            |             |
| P07604 | TYRR_ECOLI | * P07604 | P35340 | tyrr_ecoli | ahpf_ecoli  |
| P07604 | TYRR_ECOLI | * P07604 | P06959 | tyrr_ecoli | odp2_ecoli  |
| P0A6A0 | UBIB_ECOLI | * P0A6A0 | P37127 | ubib_ecoli | aega_ecoli  |
| P0A6A0 | UBIB_ECOLI | * P0A6A0 | P0A6F5 | ubib_ecoli | ch60_ecoli  |
| P0A6A0 | UBIB_ECOLI | * P0A6A0 | P0ABH9 | ubib_ecoli | clpa_ecoli  |
| P0A6A0 | UBIB_ECOLI | * P0A6A0 | P0ACJ8 | ubib_ecoli | crp_ecoli   |
| P0A6A0 | UBIB_ECOLI | * P0A6A0 | P0A6Y8 | ubib_ecoli | dnak_ecoli  |
| P0A6A0 | UBIB_ECOLI | * P0A6A0 | P0AFM6 | ubib_ecoli | pspa_ecoli  |
| P0A6A0 | UBIB_ECOLI | * P0A6A0 | P28043 | ubib_ecoli | ssb2_ecolx  |
| P0A6A0 | UBIB_ECOLI | * P0A6A0 | P0A8E5 | ubib_ecoli | yacl_ecoli  |
| P75728 | UBIF_ECOLI | * P75728 | P0A6F5 | ubif_ecoli | ch60_ecoli  |
| P75728 | UBIF_ECOLI | * P75728 | P13035 | ubif_ecoli | glpd_ecoli  |
| P75728 | UBIF_ECOLI | * P75728 | P18843 | ubif_ecoli | nade_ecoli  |
| P75728 | UBIF_ECOLI | * P75728 | P33230 | ubif_ecoli | ydac_ecoli  |
| P12758 | UDP_ECOLI  | * P12758 | P32176 | udp_ecoli  | fdog_ecoli  |
| P39304 | ULAD_ECOLI | none     |        |            |             |
| P0A9W0 | ULAR_ECOLI | * P0A9W0 | P0A6F5 | ular_ecoli | ch60_ecoli  |
| P0A9W0 | ULAR_ECOLI | * P0A9W0 | P0A6F5 | ular_ecoli | ch60_ecoli  |
| P0A9W0 | ULAR_ECOLI | * P0A9W0 | P0A6F5 | ular_ecoli | ch60_ecoli  |
| P0A9W0 | ULAR_ECOLI | * P0A9W0 | P0ACF4 | ular_ecoli | dbhb_ecoli  |
| P0A9W0 | ULAR_ECOLI | * P0A9W0 | P0A9P0 | ular_ecoli | dldh_ecoli  |
| P0A9W0 | ULAR_ECOLI | * P0A9W0 | P08622 | ular_ecoli | dnaj_ecoli  |
| P0A9W0 | ULAR_ECOLI | * P0A9W0 | P0A6Y8 | ular_ecoli | dnak_ecoli  |
| P0A9W0 | ULAR_ECOLI | * P0A9W0 | P75742 | ular_ecoli | dtpd_ecoli  |
| P0A9W0 | ULAR_ECOLI | * P0A9W0 | P0CE47 | ular_ecoli | eftu1_ecoli |
| P0A9W0 | ULAR_ECOLI | * P0A9W0 | P0CE47 | ular_ecoli | eftu1_ecoli |
| P0A9W0 | ULAR_ECOLI | * P0A9W0 | P03030 | ular_ecoli | lysr_ecoli  |
| P0A9W0 | ULAR_ECOLI | * P0A9W0 | P06959 | ular_ecoli | odp2_ecoli  |
| P0A9W0 | ULAR_ECOLI | * P0A9W0 | P0A7L0 | ular_ecoli | rl1_ecoli   |

|        |            |      |        |        |            |             |
|--------|------------|------|--------|--------|------------|-------------|
| P0A9W0 | ULAR_ECOLI | *    | P0A9W0 | P0AA10 | ular_ecoli | rl13_ecoli  |
| P0A9W0 | ULAR_ECOLI | *    | P0A9W0 | P0ADY3 | ular_ecoli | rl14_ecoli  |
| P0A9W0 | ULAR_ECOLI | *    | P0A9W0 | P0A7K6 | ular_ecoli | rl19_ecoli  |
| P0A9W0 | ULAR_ECOLI | *    | P0A9W0 | P0AG48 | ular_ecoli | rl21_ecoli  |
| P0A9W0 | ULAR_ECOLI | *    | P0A9W0 | P61175 | ular_ecoli | rl22_ecoli  |
| P0A9W0 | ULAR_ECOLI | *    | P0A9W0 | P0A7M2 | ular_ecoli | rl28_ecoli  |
| P0A9W0 | ULAR_ECOLI | *    | P0A9W0 | P60438 | ular_ecoli | rl3_ecoli   |
| P0A9W0 | ULAR_ECOLI | *    | P0A9W0 | P60438 | ular_ecoli | rl3_ecoli   |
| P0A9W0 | ULAR_ECOLI | *    | P0A9W0 | P60723 | ular_ecoli | rl4_ecoli   |
| P0A9W0 | ULAR_ECOLI | *    | P0A9W0 | P0A7K2 | ular_ecoli | rl7_ecoli   |
| P0A9W0 | ULAR_ECOLI | *    | P0A9W0 | P0AG67 | ular_ecoli | rs1_ecoli   |
| P0A9W0 | ULAR_ECOLI | *    | P0A9W0 | P0A7R5 | ular_ecoli | rs10_ecoli  |
| P0A9W0 | ULAR_ECOLI | *    | P0A9W0 | P0A7S3 | ular_ecoli | rs12_ecoli  |
| P0A9W0 | ULAR_ECOLI | *    | P0A9W0 | P0A7S9 | ular_ecoli | rs13_ecoli  |
| P0A9W0 | ULAR_ECOLI | *    | P0A9W0 | P0A7S9 | ular_ecoli | rs13_ecoli  |
| P0A9W0 | ULAR_ECOLI | *    | P0A9W0 | P0AG59 | ular_ecoli | rs14_ecoli  |
| P0A9W0 | ULAR_ECOLI | *    | P0A9W0 | P0A7U3 | ular_ecoli | rs19_ecoli  |
| P0A9W0 | ULAR_ECOLI | *    | P0A9W0 | P0A7V0 | ular_ecoli | rs2_ecoli   |
| P0A9W0 | ULAR_ECOLI | *    | P0A9W0 | P0A7U7 | ular_ecoli | rs20_ecoli  |
| P0A9W0 | ULAR_ECOLI | *    | P0A9W0 | P0A7V3 | ular_ecoli | rs3_ecoli   |
| P0A9W0 | ULAR_ECOLI | *    | P0A9W0 | P0A7V8 | ular_ecoli | rs4_ecoli   |
| P0A9W0 | ULAR_ECOLI | *    | P0A9W0 | P0A7V8 | ular_ecoli | rs4_ecoli   |
| P0A9W0 | ULAR_ECOLI | *    | P0A9W0 | P0A7W1 | ular_ecoli | rs5_ecoli   |
| P0A9W0 | ULAR_ECOLI | *    | P0A9W0 | P0A7W1 | ular_ecoli | rs5_ecoli   |
| P0A9W0 | ULAR_ECOLI | *    | P0A9W0 | P02359 | ular_ecoli | rs7_ecoli   |
| P0A9W0 | ULAR_ECOLI | *    | P0A9W0 | P0A7W7 | ular_ecoli | rs8_ecoli   |
| P0A9W0 | ULAR_ECOLI | *    | P0A9W0 | P0A7X3 | ular_ecoli | rs9_ecoli   |
| P0A9W0 | ULAR_ECOLI | *    | P0A9W0 | P77802 | ular_ecoli | yagx_ecoli  |
| P0A9W0 | ULAR_ECOLI | *    | P0A9W0 | P66948 | ular_ecoli | yfgc_ecoli  |
| P0A9W0 | ULAR_ECOLI | *    | P0A9W0 | P76578 | ular_ecoli | yfhm_ecoli  |
| P0A9W0 | ULAR_ECOLI | *    | P0A9W0 | P67660 | ular_ecoli | yhaj_ecoli  |
| P0A9W0 | ULAR_ECOLI | *    | P0A9W0 | P76092 | ular_ecoli | ynbc_ecoli  |
|        |            |      |        |        |            |             |
| P0A8F0 | UPP_ECOLI  | *    | P0A8F0 | P0ACJ0 | upp_ecoli  | lrp_ecoli   |
| P0A8F0 | UPP_ECOLI  | *    | P0A8F0 | P15288 | upp_ecoli  | pepd_ecoli  |
| P0A8F0 | UPP_ECOLI  | *    | P0A8F0 | P08179 | upp_ecoli  | pur3_ecoli  |
| P0A8F0 | UPP_ECOLI  | *    | P0A8F0 | P0AG44 | upp_ecoli  | rl17_ecoli  |
|        |            |      |        |        |            |             |
| P32326 | URER_ECOLX | none |        |        |            |             |
|        |            |      |        |        |            |             |
| P08390 | USG_ECOLI  | *    | P08390 | P38054 | usg_ecoli  | cusa_ecoli  |
| P08390 | USG_ECOLI  | *    | P08390 | P0CE47 | usg_ecoli  | eftu1_ecoli |
| P08390 | USG_ECOLI  | *    | P08390 | P0CE47 | usg_ecoli  | eftu1_ecoli |
| P08390 | USG_ECOLI  | *    | P08390 | P21599 | usg_ecoli  | kpyk2_ecoli |
| P08390 | USG_ECOLI  | *    | P08390 | P0AFG0 | usg_ecoli  | nusg_ecoli  |



|        |            |      |        |        |            |            |
|--------|------------|------|--------|--------|------------|------------|
| P08390 | USG_ECOLI  | *    | P08390 | P0AFG0 | usg_ecoli  | nusg_ecoli |
| P08390 | USG_ECOLI  | *    | P08390 | P0A799 | usg_ecoli  | pgk_ecoli  |
| P08390 | USG_ECOLI  | *    | P08390 | P0A7K2 | usg_ecoli  | rl7_ecoli  |
| P08390 | USG_ECOLI  | *    | P08390 | P0A7Z4 | usg_ecoli  | rpoa_ecoli |
| P08390 | USG_ECOLI  | *    | P08390 | P0A8V2 | usg_ecoli  | rpob_ecoli |
| P08390 | USG_ECOLI  | *    | P08390 | P0A8T7 | usg_ecoli  | rpoc_ecoli |
| P08390 | USG_ECOLI  | *    | P08390 | P0A8T7 | usg_ecoli  | rpoc_ecoli |
| P08390 | USG_ECOLI  | *    | P08390 | P0A8T7 | usg_ecoli  | rpoc_ecoli |
| P08390 | USG_ECOLI  | *    | P08390 | P0A7V3 | usg_ecoli  | rs3_ecoli  |
| P08390 | USG_ECOLI  | *    | P08390 | P0ACT6 | usg_ecoli  | uidr_ecoli |
| P08390 | USG_ECOLI  | *    | P08390 | P77395 | usg_ecoli  | ybbn_ecoli |
| P08390 | USG_ECOLI  | *    | P08390 | P0ADE8 | usg_ecoli  | ygfz_ecoli |
| P08390 | USG_ECOLI  | *    | P08390 | P0ADK6 | usg_ecoli  | yiba_ecoli |
| P08390 | USG_ECOLI  | *    | P08390 | P32701 | usg_ecoli  | yjcc_ecoli |
|        |            |      |        |        |            |            |
| POAED0 | USPA_ECOLI | *    | POAED0 | P0ACG1 | uspa_ecoli | stpa_ecoli |
| POAED0 | USPA_ECOLI | *    | POAED0 | P30176 | uspa_ecoli | ybia_ecoli |
| POAED0 | USPA_ECOLI | *    | POAED0 | P0ADK8 | uspa_ecoli | yibl_ecoli |
|        |            |      |        |        |            |            |
| POAAB8 | USPD_ECOLI | none |        |        |            |            |
|        |            |      |        |        |            |            |
| POAAC0 | USPE_ECOLI | none |        |        |            |            |
|        |            |      |        |        |            |            |
| P37903 | USPF_ECOLI | *    | P37903 | P0ABE7 | uspf_ecoli | c562_ecolx |
| P37903 | USPF_ECOLI | *    | P37903 | P0A6Y8 | uspf_ecoli | dnak_ecoli |
| P37903 | USPF_ECOLI | *    | P37903 | P0ABC7 | uspf_ecoli | hflk_ecoli |
| P37903 | USPF_ECOLI | *    | P37903 | P39347 | uspf_ecoli | intb_ecoli |
| P37903 | USPF_ECOLI | *    | P37903 | P77188 | uspf_ecoli | matc_ecoli |
| P37903 | USPF_ECOLI | *    | P37903 | P18843 | uspf_ecoli | nade_ecoli |
| P37903 | USPF_ECOLI | *    | P37903 | P76078 | uspf_ecoli | paab_ecoli |
| P37903 | USPF_ECOLI | *    | P37903 | P02413 | uspf_ecoli | rl15_ecoli |
| P37903 | USPF_ECOLI | *    | P37903 | P0A7K6 | uspf_ecoli | rl19_ecoli |
| P37903 | USPF_ECOLI | *    | P37903 | P60723 | uspf_ecoli | rl4_ecoli  |
| P37903 | USPF_ECOLI | *    | P37903 | P62399 | uspf_ecoli | rl5_ecoli  |
| P37903 | USPF_ECOLI | *    | P37903 | P0AA39 | uspf_ecoli | rluc_ecoli |
| P37903 | USPF_ECOLI | *    | P37903 | P0A7S9 | uspf_ecoli | rs13_ecoli |
| P37903 | USPF_ECOLI | *    | P37903 | P0A7X3 | uspf_ecoli | rs9_ecoli  |
| P37903 | USPF_ECOLI | *    | P37903 | P0AG86 | uspf_ecoli | secb_ecoli |
| P37903 | USPF_ECOLI | *    | P37903 | P80644 | uspf_ecoli | ssue_ecoli |
| P37903 | USPF_ECOLI | *    | P37903 | P0ACJ5 | uspf_ecoli | ybao_ecoli |
| P37903 | USPF_ECOLI | *    | P37903 | P0AB43 | uspf_ecoli | ycgl_ecoli |
| P37903 | USPF_ECOLI | *    | P37903 | P52128 | uspf_ecoli | yfjm_ecoli |
|        |            |      |        |        |            |            |
| P39177 | USPG_ECOLI | *    | P39177 | P35340 | uspg_ecoli | ahpf_ecoli |
| P39177 | USPG_ECOLI | *    | P39177 | P0ABB0 | uspg_ecoli | atpa_ecoli |

|        |            |   |        |        |            |             |
|--------|------------|---|--------|--------|------------|-------------|
| P39177 | USPG_ECOLI | * | P39177 | P00722 | uspg_ecoli | bgal_ecoli  |
| P39177 | USPG_ECOLI | * | P39177 | P0A6F1 | uspg_ecoli | cara_ecoli  |
| P39177 | USPG_ECOLI | * | P39177 | P0A6F5 | uspg_ecoli | ch60_ecoli  |
| P39177 | USPG_ECOLI | * | P39177 | P0A6F5 | uspg_ecoli | ch60_ecoli  |
| P39177 | USPG_ECOLI | * | P39177 | P0A6F5 | uspg_ecoli | ch60_ecoli  |
| P39177 | USPG_ECOLI | * | P39177 | P0A6J5 | uspg_ecoli | dada_ecoli  |
| P39177 | USPG_ECOLI | * | P39177 | P0AC41 | uspg_ecoli | dhsa_ecoli  |
| P39177 | USPG_ECOLI | * | P39177 | P08622 | uspg_ecoli | dnaj_ecoli  |
| P39177 | USPG_ECOLI | * | P39177 | P08622 | uspg_ecoli | dnaj_ecoli  |
| P39177 | USPG_ECOLI | * | P39177 | P0A6Y8 | uspg_ecoli | dnak_ecoli  |
| P39177 | USPG_ECOLI | * | P39177 | P0A6Y8 | uspg_ecoli | dnak_ecoli  |
| P39177 | USPG_ECOLI | * | P39177 | P10443 | uspg_ecoli | dpo3a_ecoli |
| P39177 | USPG_ECOLI | * | P39177 | P0CE47 | uspg_ecoli | eftu1_ecoli |
| P39177 | USPG_ECOLI | * | P39177 | P13035 | uspg_ecoli | glpd_ecoli  |
| P39177 | USPG_ECOLI | * | P39177 | P67910 | uspg_ecoli | hldd_ecoli  |
| P39177 | USPG_ECOLI | * | P39177 | P22523 | uspg_ecoli | mukb_ecoli  |
| P39177 | USPG_ECOLI | * | P39177 | P23538 | uspg_ecoli | ppsa_ecoli  |
| P39177 | USPG_ECOLI | * | P39177 | P09546 | uspg_ecoli | puta_ecoli  |
| P39177 | USPG_ECOLI | * | P39177 | P0ADZ0 | uspg_ecoli | rl23_ecoli  |
| P39177 | USPG_ECOLI | * | P39177 | P0A7K2 | uspg_ecoli | rl7_ecoli   |
| P39177 | USPG_ECOLI | * | P39177 | P0A8V2 | uspg_ecoli | rpob_ecoli  |
| P39177 | USPG_ECOLI | * | P39177 | P0A8T7 | uspg_ecoli | rpoc_ecoli  |
| P39177 | USPG_ECOLI | * | P39177 | P10408 | uspg_ecoli | seca_ecoli  |
| P39177 | USPG_ECOLI | * | P39177 | P0AG86 | uspg_ecoli | secb_ecoli  |
| P39177 | USPG_ECOLI | * | P39177 | P00944 | uspg_ecoli | xyla_ecoli  |
| P39177 | USPG_ECOLI | * | P39177 | P75838 | uspg_ecoli | ycao_ecoli  |
| P43672 | UUP_ECOLI  | * | P43672 | P25553 | uup_ecoli  | alda_ecoli  |
| P43672 | UUP_ECOLI  | * | P43672 | P18843 | uup_ecoli  | nade_ecoli  |
| P43672 | UUP_ECOLI  | * | P43672 | P0A8N3 | uup_ecoli  | syk1_ecoli  |
| P43672 | UUP_ECOLI  | * | P43672 | Q47536 | uup_ecoli  | yaip_ecoli  |
| P43672 | UUP_ECOLI  | * | P43672 | P76069 | uup_ecoli  | yday_ecoli  |
| P43672 | UUP_ECOLI  | * | P43672 | P37774 | uup_ecoli  | yecc_ecoli  |
| P43672 | UUP_ECOLI  | * | P43672 | P76440 | uup_ecoli  | yeit_ecoli  |
| P0A698 | UVRA_ECOLI | * | P0A698 | P0A6Y8 | uvra_ecoli | dnak_ecoli  |
| P0A698 | UVRA_ECOLI | * | P0A698 | P09152 | uvra_ecoli | narg_ecoli  |
| P0A698 | UVRA_ECOLI | * | P0A698 | P19319 | uvra_ecoli | narz_ecoli  |
| P0A8G0 | UVRC_ECOLI | * | P0A8G0 | P0A9Y6 | uvrc_ecoli | cspc_ecoli  |
| P0A8G0 | UVRC_ECOLI | * | P0A8G0 | P0ACF0 | uvrc_ecoli | dbha_ecoli  |
| P0A8G0 | UVRC_ECOLI | * | P0A8G0 | P76128 | uvrc_ecoli | ddpa_ecoli  |
| P0A8G0 | UVRC_ECOLI | * | P0A8G0 | P0A9P0 | uvrc_ecoli | dldh_ecoli  |
| P0A8G0 | UVRC_ECOLI | * | P0A8G0 | P0A9P0 | uvrc_ecoli | dldh_ecoli  |
| P0A8G0 | UVRC_ECOLI | * | P0A8G0 | P0AC55 | uvrc_ecoli | glnk_ecoli  |

|        |            |   |        |        |            |            |
|--------|------------|---|--------|--------|------------|------------|
| POA8G0 | UVRC_ECOLI | * | POA8G0 | P0AFG3 | uvrc_ecoli | odo1_ecoli |
| POA8G0 | UVRC_ECOLI | * | POA8G0 | P0AFG6 | uvrc_ecoli | odo2_ecoli |
| POA8G0 | UVRC_ECOLI | * | POA8G0 | P0AFG8 | uvrc_ecoli | odp1_ecoli |
| POA8G0 | UVRC_ECOLI | * | POA8G0 | P07001 | uvrc_ecoli | pnta_ecoli |
| POA8G0 | UVRC_ECOLI | * | POA8G0 | P0A7L0 | uvrc_ecoli | rl1_ecoli  |
| POA8G0 | UVRC_ECOLI | * | POA8G0 | P0A7L0 | uvrc_ecoli | rl1_ecoli  |
| POA8G0 | UVRC_ECOLI | * | POA8G0 | P0AA10 | uvrc_ecoli | rl13_ecoli |
| POA8G0 | UVRC_ECOLI | * | POA8G0 | P0ADY3 | uvrc_ecoli | rl14_ecoli |
| POA8G0 | UVRC_ECOLI | * | POA8G0 | P0A7K6 | uvrc_ecoli | rl19_ecoli |
| POA8G0 | UVRC_ECOLI | * | POA8G0 | P60422 | uvrc_ecoli | rl2_ecoli  |
| POA8G0 | UVRC_ECOLI | * | POA8G0 | P60422 | uvrc_ecoli | rl2_ecoli  |
| POA8G0 | UVRC_ECOLI | * | POA8G0 | P0A7L3 | uvrc_ecoli | rl20_ecoli |
| POA8G0 | UVRC_ECOLI | * | POA8G0 | P0AG48 | uvrc_ecoli | rl21_ecoli |
| POA8G0 | UVRC_ECOLI | * | POA8G0 | P61175 | uvrc_ecoli | rl22_ecoli |
| POA8G0 | UVRC_ECOLI | * | POA8G0 | P68919 | uvrc_ecoli | rl25_ecoli |
| POA8G0 | UVRC_ECOLI | * | POA8G0 | P0A7M2 | uvrc_ecoli | rl28_ecoli |
| POA8G0 | UVRC_ECOLI | * | POA8G0 | P60438 | uvrc_ecoli | rl3_ecoli  |
| POA8G0 | UVRC_ECOLI | * | POA8G0 | P60438 | uvrc_ecoli | rl3_ecoli  |
| POA8G0 | UVRC_ECOLI | * | POA8G0 | P60723 | uvrc_ecoli | rl4_ecoli  |
| POA8G0 | UVRC_ECOLI | * | POA8G0 | P0A7R1 | uvrc_ecoli | rl9_ecoli  |
| POA8G0 | UVRC_ECOLI | * | POA8G0 | P0AG67 | uvrc_ecoli | rs1_ecoli  |
| POA8G0 | UVRC_ECOLI | * | POA8G0 | P0A7R5 | uvrc_ecoli | rs10_ecoli |
| POA8G0 | UVRC_ECOLI | * | POA8G0 | P0A7R9 | uvrc_ecoli | rs11_ecoli |
| POA8G0 | UVRC_ECOLI | * | POA8G0 | P0A7S3 | uvrc_ecoli | rs12_ecoli |
| POA8G0 | UVRC_ECOLI | * | POA8G0 | P0A7S9 | uvrc_ecoli | rs13_ecoli |
| POA8G0 | UVRC_ECOLI | * | POA8G0 | P0A7S9 | uvrc_ecoli | rs13_ecoli |
| POA8G0 | UVRC_ECOLI | * | POA8G0 | P0AG59 | uvrc_ecoli | rs14_ecoli |
| POA8G0 | UVRC_ECOLI | * | POA8G0 | P0ADZ4 | uvrc_ecoli | rs15_ecoli |
| POA8G0 | UVRC_ECOLI | * | POA8G0 | P0A7T7 | uvrc_ecoli | rs18_ecoli |
| POA8G0 | UVRC_ECOLI | * | POA8G0 | P0A7U3 | uvrc_ecoli | rs19_ecoli |
| POA8G0 | UVRC_ECOLI | * | POA8G0 | P0A7V0 | uvrc_ecoli | rs2_ecoli  |
| POA8G0 | UVRC_ECOLI | * | POA8G0 | P0A7U7 | uvrc_ecoli | rs20_ecoli |
| POA8G0 | UVRC_ECOLI | * | POA8G0 | P0A7V3 | uvrc_ecoli | rs3_ecoli  |
| POA8G0 | UVRC_ECOLI | * | POA8G0 | P0A7V3 | uvrc_ecoli | rs3_ecoli  |
| POA8G0 | UVRC_ECOLI | * | POA8G0 | P0A7V8 | uvrc_ecoli | rs4_ecoli  |
| POA8G0 | UVRC_ECOLI | * | POA8G0 | P0A7V8 | uvrc_ecoli | rs4_ecoli  |
| POA8G0 | UVRC_ECOLI | * | POA8G0 | P0A7W1 | uvrc_ecoli | rs5_ecoli  |
| POA8G0 | UVRC_ECOLI | * | POA8G0 | P02358 | uvrc_ecoli | rs6_ecoli  |
| POA8G0 | UVRC_ECOLI | * | POA8G0 | P02359 | uvrc_ecoli | rs7_ecoli  |
| POA8G0 | UVRC_ECOLI | * | POA8G0 | P02359 | uvrc_ecoli | rs7_ecoli  |
| POA8G0 | UVRC_ECOLI | * | POA8G0 | P0A7W7 | uvrc_ecoli | rs8_ecoli  |
| POA8G0 | UVRC_ECOLI | * | POA8G0 | P77172 | uvrc_ecoli | yfgf_ecoli |
| POA8G0 | UVRC_ECOLI | * | POA8G0 | P07021 | uvrc_ecoli | yfib_ecoli |
| POA8G0 | UVRC_ECOLI | * | POA8G0 | P0AGJ5 | uvrc_ecoli | yfif_ecoli |
| POA8G0 | UVRC_ECOLI | * | POA8G0 | P0AGK4 | uvrc_ecoli | yhby_ecoli |

|        |            |   |        |        |            |            |
|--------|------------|---|--------|--------|------------|------------|
| P0A8G0 | UVRC_ECOLI | * | P0A8G0 | P31806 | uvrc_ecoli | yjef_ecoli |
| P39160 | UXUB_ECOLI | * | P39160 | P18843 | uxub_ecoli | nade_ecoli |
| P39160 | UXUB_ECOLI | * | P39160 | P08400 | uxub_ecoli | phor_ecoli |
| P25535 | VISC_ECOLI |   | none   |        |            |            |
| P0ACD2 | WCAF_ECOLI |   | none   |        |            |            |
| P27828 | WECB_ECOLI |   | none   |        |            |            |
| P27829 | WECC_ECOLI |   | none   |        |            |            |
| P0A8G6 | WRBA_ECOLI | * | P0A8G6 | P33593 | wrba_ecoli | nikd_ecoli |
| P0A8G6 | WRBA_ECOLI | * | P0A8G6 | P23836 | wrba_ecoli | phop_ecoli |
| P0A8P8 | XERD_ECOLI | * | P0A8P8 | P0A6A8 | xerd_ecoli | acp_ecoli  |
| P0A8P8 | XERD_ECOLI | * | P0A8P8 | P0A717 | xerd_ecoli | kprs_ecoli |
| P0A8P8 | XERD_ECOLI | * | P0A8P8 | P22523 | xerd_ecoli | mukb_ecoli |
| P0A8P8 | XERD_ECOLI | * | P0A8P8 | P0AG44 | xerd_ecoli | rl17_ecoli |
| P0A8P8 | XERD_ECOLI | * | P0A8P8 | P0A7X3 | xerd_ecoli | rs9_ecoli  |
| P0A8P8 | XERD_ECOLI | * | P0A8P8 | P39321 | xerd_ecoli | ytnf_ecoli |
| P0A9M5 | XGPT_ECOLI | * | P0A9M5 | P0A901 | xgpt_ecoli | bhc_ecoli  |
| P36879 | YADG_ECOLI | * | P36879 | P0A6F5 | yadg_ecoli | ch60_ecoli |
| P36879 | YADG_ECOLI | * | P36879 | P13035 | yadg_ecoli | glpd_ecoli |
| P62768 | YAEH_ECOLI |   | none   |        |            |            |
| P0A940 | YAET_ECOLI | * | P0A940 | P11557 | yaet_ecoli | damx_ecoli |
| P30864 | YAFC_ECOLI | * | P30864 | P0A7B1 | yafc_ecoli | ppk_ecoli  |
| P77300 | YAGI_ECOLI | * | P77300 | P00722 | yagi_ecoli | bgal_ecoli |
| P77300 | YAGI_ECOLI | * | P77300 | P06611 | yagi_ecoli | btud_ecoli |
| P77300 | YAGI_ECOLI | * | P77300 | P24183 | yagi_ecoli | fdng_ecoli |
| P77300 | YAGI_ECOLI | * | P77300 | P50457 | yagi_ecoli | puue_ecoli |
| P77300 | YAGI_ECOLI | * | P77300 | P0A9W3 | yagi_ecoli | yjjk_ecoli |
| P77607 | YAGL_ECOLI | * | P77607 | P0A6Y8 | yagl_ecoli | dnak_ecoli |
| P77607 | YAGL_ECOLI | * | P77607 | P0A7U7 | yagl_ecoli | rs20_ecoli |
| P77607 | YAGL_ECOLI | * | P77607 | P0A9K9 | yagl_ecoli | slyd_ecoli |
| P77802 | YAGX_ECOLI |   | none   |        |            |            |

|        |            |          |        |            |             |
|--------|------------|----------|--------|------------|-------------|
| P21514 | YAHA_ECOLI | * P21514 | P0A9D8 | yaha_ecoli | dapd_ecoli  |
| P21514 | YAHA_ECOLI | * P21514 | P0A7L0 | yaha_ecoli | rl1_ecoli   |
| P21514 | YAHA_ECOLI | * P21514 | P0A7X3 | yaha_ecoli | rs9_ecoli   |
| P75691 | YAHK_ECOLI | * P75691 | P22523 | yahk_ecoli | mukb_ecoli  |
| P75691 | YAHK_ECOLI | * P75691 | P18843 | yahk_ecoli | nade_ecoli  |
| P75691 | YAHK_ECOLI | * P75691 | P0ABL5 | yahk_ecoli | napc_ecoli  |
| P75691 | YAHK_ECOLI | * P75691 | P0AG44 | yahk_ecoli | rl17_ecoli  |
| P75691 | YAHK_ECOLI | * P75691 | P0AAQ6 | yahk_ecoli | ybaa_ecoli  |
| P51024 | YAIL_ECOLI | * P51024 | P18843 | yail_ecoli | nade_ecoli  |
| P51024 | YAIL_ECOLI | * P51024 | P0A843 | yail_ecoli | tate_ecoli  |
| P51024 | YAIL_ECOLI | * P51024 | P37750 | yail_ecoli | wbbj_ecoli  |
| P0ADZ7 | YAJC_ECOLI | * P0ADZ7 | P0ADZ7 | yajc_ecoli | yajc_ecoli  |
| P0A8E7 | YAJQ_ECOLI | * P0A8E7 | P0A988 | yajq_ecoli | dpo3b_ecoli |
| P77726 | YAJR_ECOLI | none     |        |            |             |
| P0A8B5 | YBAB_ECOLI | * P0A8B5 | P0A9P6 | ybab_ecoli | dead_ecoli  |
| P0A8B5 | YBAB_ECOLI | * P0A8B5 | P27294 | ybab_ecoli | inaa_ecoli  |
| P0A8B5 | YBAB_ECOLI | * P0A8B5 | P39347 | ybab_ecoli | intb_ecoli  |
| P0A8B5 | YBAB_ECOLI | * P0A8B5 | P18843 | ybab_ecoli | nade_ecoli  |
| P0A8B5 | YBAB_ECOLI | * P0A8B5 | P0A7L3 | ybab_ecoli | rl20_ecoli  |
| P0A8B5 | YBAB_ECOLI | * P0A8B5 | P77377 | ybab_ecoli | wzxc_ecoli  |
| P0A8B5 | YBAB_ECOLI | * P0A8B5 | P0AB52 | ybab_ecoli | ychn_ecoli  |
| P77528 | YBCD_ECOLI | * P77528 | P76261 | ybcd_ecoli | adrb_ecoli  |
| P37325 | YBCH_ECOLI | * P37325 | P0ABB0 | ybch_ecoli | atpa_ecoli  |
| P37325 | YBCH_ECOLI | * P37325 | P0A6F5 | ybch_ecoli | ch60_ecoli  |
| P37325 | YBCH_ECOLI | * P37325 | P00895 | ybch_ecoli | trpe_ecoli  |
| P37325 | YBCH_ECOLI | * P37325 | P64572 | ybch_ecoli | yghr_ecoli  |
| P77634 | YBCM_ECOLI | * P77634 | P0A6F5 | ybcm_ecoli | ch60_ecoli  |
| P77634 | YBCM_ECOLI | * P77634 | P17846 | ybcm_ecoli | cysi_ecoli  |
| P77634 | YBCM_ECOLI | * P77634 | P0A9A9 | ybcm_ecoli | fur_ecoli   |
| P77634 | YBCM_ECOLI | * P77634 | P0A772 | ybcm_ecoli | nrdi_ecoli  |
| P77634 | YBCM_ECOLI | * P77634 | P0A7J3 | ybcm_ecoli | rl10_ecoli  |
| P77634 | YBCM_ECOLI | * P77634 | P0AG44 | ybcm_ecoli | rl17_ecoli  |
| P77634 | YBCM_ECOLI | * P77634 | P0A7M2 | ybcm_ecoli | rl28_ecoli  |
| P77634 | YBCM_ECOLI | * P77634 | P0A7T7 | ybcm_ecoli | rs18_ecoli  |
| P77634 | YBCM_ECOLI | * P77634 | Q47622 | ybcm_ecoli | sapa_ecoli  |

|        |            |      |        |        |            |             |
|--------|------------|------|--------|--------|------------|-------------|
| P77634 | YBCM_ECOLI | *    | P77634 | P0AAH8 | ybcm_ecoli | sapf_ecoli  |
| P77634 | YBCM_ECOLI | *    | P77634 | P0AB61 | ybcm_ecoli | ycin_ecoli  |
| P77460 | YBCY_ECOLI | none |        |        |            |             |
| P0A8J4 | YBED_ECOLI | *    | P0A8J4 | P0A6H1 | ybed_ecoli | clpx_ecoli  |
| P0A8J4 | YBED_ECOLI | *    | P0A8J4 | P0CE47 | ybed_ecoli | eftu1_ecoli |
| P0A8J4 | YBED_ECOLI | *    | P0A8J4 | P0A9A9 | ybed_ecoli | fur_ecoli   |
| P0A8J4 | YBED_ECOLI | *    | P0A8J4 | P18843 | ybed_ecoli | nade_ecoli  |
| P0A8J4 | YBED_ECOLI | *    | P0A8J4 | P0A8V2 | ybed_ecoli | rpob_ecoli  |
| P0A8J4 | YBED_ECOLI | *    | P0A8J4 | P0A8T7 | ybed_ecoli | rpoc_ecoli  |
| P0A8J4 | YBED_ECOLI | *    | P0A8J4 | P45751 | ybed_ecoli | yrfb_ecoli  |
| P0AAU7 | YBFE_ECOLI | none |        |        |            |             |
| P0A8Z3 | YBGC_ECOLI | *    | P0A8Z3 | P0A6A8 | ybgc_ecoli | acp_ecoli   |
| P0A8Z3 | YBGC_ECOLI | *    | P0A8Z3 | O32591 | ybgc_ecoli | espp_ecolx  |
| P0A8Z3 | YBGC_ECOLI | *    | P0A8Z3 | O32591 | ybgc_ecoli | espp_ecolx  |
| P0A8Z3 | YBGC_ECOLI | *    | P0A8Z3 | O32591 | ybgc_ecoli | espp_ecolx  |
| P0A8Z3 | YBGC_ECOLI | *    | P0A8Z3 | P0A7A7 | ybgc_ecoli | plsb_ecoli  |
| P0A8Z3 | YBGC_ECOLI | *    | P0A8Z3 | P0A7A7 | ybgc_ecoli | plsb_ecoli  |
| P0A8Z3 | YBGC_ECOLI | *    | P0A8Z3 | P27247 | ybgc_ecoli | plsx_ecoli  |
| P0A8Z3 | YBGC_ECOLI | *    | P0A8Z3 | P60422 | ybgc_ecoli | rl2_ecoli   |
| P0A8Z3 | YBGC_ECOLI | *    | P0A8Z3 | P0ADZ0 | ybgc_ecoli | rl23_ecoli  |
| P0A8Z3 | YBGC_ECOLI | *    | P0A8Z3 | P60438 | ybgc_ecoli | rl3_ecoli   |
| P0A8Z3 | YBGC_ECOLI | *    | P0A8Z3 | P0A7V8 | ybgc_ecoli | rs4_ecoli   |
| P0A8Z3 | YBGC_ECOLI | *    | P0A8Z3 | P10408 | ybgc_ecoli | seca_ecoli  |
| P0A8Z3 | YBGC_ECOLI | *    | P0A8Z3 | P10408 | ybgc_ecoli | seca_ecoli  |
| P0A8Z3 | YBGC_ECOLI | *    | P0A8Z3 | P0AG24 | ybgc_ecoli | spot_ecoli  |
| P0A8Z3 | YBGC_ECOLI | *    | P0A8Z3 | P76092 | ybgc_ecoli | ynbc_ecoli  |
| P0AFP6 | YBGI_ECOLI | *    | P0AFP6 | P0A9Q1 | ybgi_ecoli | arca_ecoli  |
| P0AFP6 | YBGI_ECOLI | *    | P0AFP6 | P0ACG1 | ybgi_ecoli | stpa_ecoli  |
| P0AFP6 | YBGI_ECOLI | *    | P0AFP6 | Q46942 | ybgi_ecoli | yqei_ecoli  |
| P0AFP6 | YBGI_ECOLI | *    | P0AFP6 | Q46856 | ybgi_ecoli | yqhd_ecoli  |
| P0AFP6 | YBGI_ECOLI | *    | P0AFP6 | P0ADS2 | ybgi_ecoli | zapa_ecoli  |
| P0AAV4 | YBGJ_ECOLI | *    | P0AAV4 | P0A6F5 | ybgj_ecoli | ch60_ecoli  |
| P0AAV4 | YBGJ_ECOLI | *    | P0AAV4 | P0AC53 | ybgj_ecoli | g6pd_ecoli  |
| P0AAV4 | YBGJ_ECOLI | *    | P0AAV4 | P42911 | ybgj_ecoli | ptpd_ecoli  |
| P75745 | YBGK_ECOLI | *    | P75745 | P0A6F5 | ybgk_ecoli | ch60_ecoli  |
| P75745 | YBGK_ECOLI | *    | P75745 | P50465 | ybgk_ecoli | end8_ecoli  |
| P75745 | YBGK_ECOLI | *    | P75745 | P04079 | ybgk_ecoli | guaa_ecoli  |
| P75745 | YBGK_ECOLI | *    | P75745 | P28912 | ybgk_ecoli | yhhi_ecoli  |



|        |            |          |        |            |             |
|--------|------------|----------|--------|------------|-------------|
| P0AAW9 | YBHT_ECOLI | none     |        |            |             |
| P30177 | YBIB_ECOLI | none     |        |            |             |
| P0AAX8 | YBIS_ECOLI | * P0AAX8 | P0A6Y8 | ybis_ecoli | dnak_ecoli  |
| P0AAX8 | YBIS_ECOLI | * P0AAX8 | P0A6Z3 | ybis_ecoli | htpg_ecoli  |
| P75828 | YBJD_ECOLI | * P75828 | P0A9M0 | ybjd_ecoli | lon_ecoli   |
| P75828 | YBJD_ECOLI | * P75828 | P60422 | ybjd_ecoli | rl2_ecoli   |
| P75828 | YBJD_ECOLI | * P75828 | P0ACM5 | ybjd_ecoli | yegw_ecoli  |
| P0AAY6 | YBJN_ECOLI | none     |        |            |             |
| P0A8C1 | YBJQ_ECOLI | * P0A8C1 | P67910 | ybjq_ecoli | hldd_ecoli  |
| P75829 | YBJX_ECOLI | * P75829 | P05052 | ybjx_ecoli | appy_ecoli  |
| P75829 | YBJX_ECOLI | * P75829 | P0A6F5 | ybjx_ecoli | ch60_ecoli  |
| P75829 | YBJX_ECOLI | * P75829 | P0ACF0 | ybjx_ecoli | dbha_ecoli  |
| P75829 | YBJX_ECOLI | * P75829 | P0ACF4 | ybjx_ecoli | dbhb_ecoli  |
| P75829 | YBJX_ECOLI | * P75829 | P0A9P0 | ybjx_ecoli | dldh_ecoli  |
| P75829 | YBJX_ECOLI | * P75829 | P08622 | ybjx_ecoli | dnaj_ecoli  |
| P75829 | YBJX_ECOLI | * P75829 | P0CE47 | ybjx_ecoli | eftu1_ecoli |
| P75829 | YBJX_ECOLI | * P75829 | P0CE47 | ybjx_ecoli | eftu1_ecoli |
| P75829 | YBJX_ECOLI | * P75829 | P67910 | ybjx_ecoli | hldd_ecoli  |
| P75829 | YBJX_ECOLI | * P75829 | P06722 | ybjx_ecoli | muth_ecoli  |
| P75829 | YBJX_ECOLI | * P75829 | P06959 | ybjx_ecoli | odp2_ecoli  |
| P75829 | YBJX_ECOLI | * P75829 | P0AFI9 | ybjx_ecoli | perm_ecoli  |
| P75829 | YBJX_ECOLI | * P75829 | P23830 | ybjx_ecoli | pss_ecoli   |
| P75829 | YBJX_ECOLI | * P75829 | P0A7L0 | ybjx_ecoli | rl1_ecoli   |
| P75829 | YBJX_ECOLI | * P75829 | P0A7L0 | ybjx_ecoli | rl1_ecoli   |
| P75829 | YBJX_ECOLI | * P75829 | P0A7J3 | ybjx_ecoli | rl10_ecoli  |
| P75829 | YBJX_ECOLI | * P75829 | P0AA10 | ybjx_ecoli | rl13_ecoli  |
| P75829 | YBJX_ECOLI | * P75829 | P0AA10 | ybjx_ecoli | rl13_ecoli  |
| P75829 | YBJX_ECOLI | * P75829 | P02413 | ybjx_ecoli | rl15_ecoli  |
| P75829 | YBJX_ECOLI | * P75829 | P0AG44 | ybjx_ecoli | rl17_ecoli  |
| P75829 | YBJX_ECOLI | * P75829 | P0A7K6 | ybjx_ecoli | rl19_ecoli  |
| P75829 | YBJX_ECOLI | * P75829 | P60422 | ybjx_ecoli | rl2_ecoli   |
| P75829 | YBJX_ECOLI | * P75829 | P60422 | ybjx_ecoli | rl2_ecoli   |
| P75829 | YBJX_ECOLI | * P75829 | P60422 | ybjx_ecoli | rl2_ecoli   |
| P75829 | YBJX_ECOLI | * P75829 | P0A7L3 | ybjx_ecoli | rl20_ecoli  |
| P75829 | YBJX_ECOLI | * P75829 | P0AG48 | ybjx_ecoli | rl21_ecoli  |
| P75829 | YBJX_ECOLI | * P75829 | P61175 | ybjx_ecoli | rl22_ecoli  |
| P75829 | YBJX_ECOLI | * P75829 | P60624 | ybjx_ecoli | rl24_ecoli  |
| P75829 | YBJX_ECOLI | * P75829 | P0A7M2 | ybjx_ecoli | rl28_ecoli  |

|        |            |   |        |        |            |            |
|--------|------------|---|--------|--------|------------|------------|
| P75829 | YBJX_ECOLI | * | P75829 | P0A7M6 | ybjx_ecoli | rl29_ecoli |
| P75829 | YBJX_ECOLI | * | P75829 | P60438 | ybjx_ecoli | rl3_ecoli  |
| P75829 | YBJX_ECOLI | * | P75829 | P60438 | ybjx_ecoli | rl3_ecoli  |
| P75829 | YBJX_ECOLI | * | P75829 | P0A7N9 | ybjx_ecoli | rl33_ecoli |
| P75829 | YBJX_ECOLI | * | P75829 | P60723 | ybjx_ecoli | rl4_ecoli  |
| P75829 | YBJX_ECOLI | * | P75829 | P60723 | ybjx_ecoli | rl4_ecoli  |
| P75829 | YBJX_ECOLI | * | P75829 | P62399 | ybjx_ecoli | rl5_ecoli  |
| P75829 | YBJX_ECOLI | * | P75829 | P62399 | ybjx_ecoli | rl5_ecoli  |
| P75829 | YBJX_ECOLI | * | P75829 | P0AG55 | ybjx_ecoli | rl6_ecoli  |
| P75829 | YBJX_ECOLI | * | P75829 | P0AG55 | ybjx_ecoli | rl6_ecoli  |
| P75829 | YBJX_ECOLI | * | P75829 | P0A7K2 | ybjx_ecoli | rl7_ecoli  |
| P75829 | YBJX_ECOLI | * | P75829 | P0A7R1 | ybjx_ecoli | rl9_ecoli  |
| P75829 | YBJX_ECOLI | * | P75829 | P37765 | ybjx_ecoli | rlub_ecoli |
| P75829 | YBJX_ECOLI | * | P75829 | P21499 | ybjx_ecoli | rnr_ecoli  |
| P75829 | YBJX_ECOLI | * | P75829 | P0A8T7 | ybjx_ecoli | rpoc_ecoli |
| P75829 | YBJX_ECOLI | * | P75829 | P0AG67 | ybjx_ecoli | rs1_ecoli  |
| P75829 | YBJX_ECOLI | * | P75829 | P0AG67 | ybjx_ecoli | rs1_ecoli  |
| P75829 | YBJX_ECOLI | * | P75829 | P0A7S9 | ybjx_ecoli | rs13_ecoli |
| P75829 | YBJX_ECOLI | * | P75829 | P0A7U3 | ybjx_ecoli | rs19_ecoli |
| P75829 | YBJX_ECOLI | * | P75829 | P0A7V0 | ybjx_ecoli | rs2_ecoli  |
| P75829 | YBJX_ECOLI | * | P75829 | P0A7V0 | ybjx_ecoli | rs2_ecoli  |
| P75829 | YBJX_ECOLI | * | P75829 | P0A7U7 | ybjx_ecoli | rs20_ecoli |
| P75829 | YBJX_ECOLI | * | P75829 | P0A7V3 | ybjx_ecoli | rs3_ecoli  |
| P75829 | YBJX_ECOLI | * | P75829 | P0A7V3 | ybjx_ecoli | rs3_ecoli  |
| P75829 | YBJX_ECOLI | * | P75829 | P0A7V8 | ybjx_ecoli | rs4_ecoli  |
| P75829 | YBJX_ECOLI | * | P75829 | P0A7W1 | ybjx_ecoli | rs5_ecoli  |
| P75829 | YBJX_ECOLI | * | P75829 | P02358 | ybjx_ecoli | rs6_ecoli  |
| P75829 | YBJX_ECOLI | * | P75829 | P02359 | ybjx_ecoli | rs7_ecoli  |
| P75829 | YBJX_ECOLI | * | P75829 | P02359 | ybjx_ecoli | rs7_ecoli  |
| P75829 | YBJX_ECOLI | * | P75829 | P21507 | ybjx_ecoli | srmb_ecoli |
| P75829 | YBJX_ECOLI | * | P75829 | P08245 | ybjx_ecoli | ycih_ecoli |
| P21367 | YCAC_ECOLI | * | P21367 | P09546 | ycac_ecoli | puta_ecoli |
| P21367 | YCAC_ECOLI | * | P21367 | P0A843 | ycac_ecoli | tate_ecoli |
| P75838 | YCAO_ECOLI | * | P75838 | P32721 | ycao_ecoli | alsa_ecoli |
| P75838 | YCAO_ECOLI | * | P75838 | P0A7M6 | ycao_ecoli | rl29_ecoli |
| P22525 | YCBB_ECOLI | * | P22525 | P0AFG6 | ycbb_ecoli | odo2_ecoli |
| P0A8N0 | YCBG_ECOLI | * | P0A8N0 | P0A9N4 | ycbg_ecoli | pfla_ecoli |
| P0A8N0 | YCBG_ECOLI | * | P0A8N0 | P0A7L0 | ycbg_ecoli | rl1_ecoli  |
| P0A8N0 | YCBG_ECOLI | * | P0A8N0 | P60422 | ycbg_ecoli | rl2_ecoli  |
| P0A8N0 | YCBG_ECOLI | * | P0A8N0 | P0A7W1 | ycbg_ecoli | rs5_ecoli  |
| P0A8N0 | YCBG_ECOLI | * | P0A8N0 | P39306 | ycbg_ecoli | ulaf_ecoli |

|        |            |      |        |        |            |            |
|--------|------------|------|--------|--------|------------|------------|
| P0A8N0 | YCBG_ECOLI | *    | P0A8N0 | P75989 | ycbg_ecoli | ycge_ecoli |
| P75849 | YCBL_ECOLI | *    | P75849 | P06974 | ycbl_ecoli | flim_ecoli |
| P75849 | YCBL_ECOLI | *    | P75849 | P0AFG3 | ycbl_ecoli | odo1_ecoli |
| P75849 | YCBL_ECOLI | *    | P75849 | P77554 | ycbl_ecoli | yahj_ecoli |
| P75874 | YCCU_ECOLI | *    | P75874 | P0A7K2 | yccu_ecoli | rl7_ecoli  |
| P0AB28 | YCED_ECOLI | *    | P0AB28 | P31680 | yced_ecoli | djla_ecoli |
| P0AB28 | YCED_ECOLI | *    | P0AB28 | P0ACF8 | yced_ecoli | hns_ecoli  |
| P0AB28 | YCED_ECOLI | *    | P0AB28 | P22523 | yced_ecoli | mukb_ecoli |
| P0AB28 | YCED_ECOLI | *    | P0AB28 | P15288 | yced_ecoli | pepd_ecoli |
| P0AB28 | YCED_ECOLI | *    | P0AB28 | P0AG44 | yced_ecoli | rl17_ecoli |
| P0AB28 | YCED_ECOLI | *    | P0AB28 | P62399 | yced_ecoli | rl5_ecoli  |
| P0AB28 | YCED_ECOLI | *    | P0AB28 | P0AG55 | yced_ecoli | rl6_ecoli  |
| P0AB28 | YCED_ECOLI | *    | P0AB28 | P0A7R5 | yced_ecoli | rs10_ecoli |
| P0AB28 | YCED_ECOLI | *    | P0AB28 | P0A7V3 | yced_ecoli | rs3_ecoli  |
| P0AB28 | YCED_ECOLI | *    | P0AB28 | P0A7X3 | yced_ecoli | rs9_ecoli  |
| P0A729 | YCEF_ECOLI | none |        |        |            |            |
| P27431 | YCFD_ECOLI | *    | P27431 | P0A717 | ycfd_ecoli | kprs_ecoli |
| P27431 | YCFD_ECOLI | *    | P27431 | P0AFD1 | ycfd_ecoli | nuoe_ecoli |
| P27431 | YCFD_ECOLI | *    | P27431 | P31663 | ycfd_ecoli | panc_ecoli |
| P27431 | YCFD_ECOLI | *    | P27431 | P09373 | ycfd_ecoli | pflb_ecoli |
| P27431 | YCFD_ECOLI | *    | P27431 | P0ADY7 | ycfd_ecoli | rl16_ecoli |
| P27431 | YCFD_ECOLI | *    | P27431 | P0AG44 | ycfd_ecoli | rl17_ecoli |
| P27431 | YCFD_ECOLI | *    | P27431 | P60422 | ycfd_ecoli | rl2_ecoli  |
| P27431 | YCFD_ECOLI | *    | P27431 | P0A8I8 | ycfd_ecoli | rlmh_ecoli |
| P27431 | YCFD_ECOLI | *    | P27431 | P0A7V3 | ycfd_ecoli | rs3_ecoli  |
| P27431 | YCFD_ECOLI | *    | P27431 | P0A7X3 | ycfd_ecoli | rs9_ecoli  |
| P27431 | YCFD_ECOLI | *    | P27431 | P76154 | ycfd_ecoli | ydfk_ecoli |
| P27431 | YCFD_ECOLI | *    | P27431 | P76073 | ycfd_ecoli | ynae_ecoli |
| P0A8E1 | YCFP_ECOLI | none |        |        |            |            |
| P75952 | YCFQ_ECOLI | none |        |        |            |            |
| P75961 | YCFZ_ECOLI | none |        |        |            |            |
| P29013 | YCGB_ECOLI | *    | P29013 | P0A6F5 | ycgb_ecoli | ch60_ecoli |
| P29013 | YCGB_ECOLI | *    | P29013 | P30128 | ycgb_ecoli | greb_ecoli |
| P29013 | YCGB_ECOLI | *    | P29013 | P60422 | ycgb_ecoli | rl2_ecoli  |
| P29013 | YCGB_ECOLI | *    | P29013 | P0AED5 | ycgb_ecoli | uvry_ecoli |

|        |            |          |        |            |             |
|--------|------------|----------|--------|------------|-------------|
| P76000 | YCGI_ECOLI | none     |        |            |             |
| P37052 | YCHJ_ECOLI | * P37052 | P0A6F5 | ychj_ecoli | ch60_ecoli  |
| P37052 | YCHJ_ECOLI | * P37052 | P24251 | ychj_ecoli | crl_ecoli   |
| P37052 | YCHJ_ECOLI | * P37052 | P24183 | ychj_ecoli | fdng_ecoli  |
| P37052 | YCHJ_ECOLI | * P37052 | P0ACF8 | ychj_ecoli | hns_ecoli   |
| P37052 | YCHJ_ECOLI | * P37052 | P23482 | ychj_ecoli | hyfb_ecoli  |
| P37052 | YCHJ_ECOLI | * P37052 | P71229 | ychj_ecoli | hyfr_ecoli  |
| P37052 | YCHJ_ECOLI | * P37052 | P75679 | ychj_ecoli | insn1_ecoli |
| P37052 | YCHJ_ECOLI | * P37052 | P62620 | ychj_ecoli | ispg_ecoli  |
| P37052 | YCHJ_ECOLI | * P37052 | P0AEZ3 | ychj_ecoli | mind_ecoli  |
| P37052 | YCHJ_ECOLI | * P37052 | P54746 | ychj_ecoli | mngb_ecoli  |
| P37052 | YCHJ_ECOLI | * P37052 | P19319 | ychj_ecoli | narz_ecoli  |
| P37052 | YCHJ_ECOLI | * P37052 | P0A772 | ychj_ecoli | nrdi_ecoli  |
| P37052 | YCHJ_ECOLI | * P37052 | P0A7E1 | ychj_ecoli | pyrd_ecoli  |
| P37052 | YCHJ_ECOLI | * P37052 | P0A7L0 | ychj_ecoli | rl1_ecoli   |
| P37052 | YCHJ_ECOLI | * P37052 | P60422 | ychj_ecoli | rl2_ecoli   |
| P37052 | YCHJ_ECOLI | * P37052 | P60723 | ychj_ecoli | rl4_ecoli   |
| P37052 | YCHJ_ECOLI | * P37052 | P62399 | ychj_ecoli | rl5_ecoli   |
| P37052 | YCHJ_ECOLI | * P37052 | P0A7V0 | ychj_ecoli | rs2_ecoli   |
| P37052 | YCHJ_ECOLI | * P37052 | P0A7V3 | ychj_ecoli | rs3_ecoli   |
| P37052 | YCHJ_ECOLI | * P37052 | P0A7V8 | ychj_ecoli | rs4_ecoli   |
| P37052 | YCHJ_ECOLI | * P37052 | P0A7X3 | ychj_ecoli | rs9_ecoli   |
| P37052 | YCHJ_ECOLI | * P37052 | P38104 | ychj_ecoli | rspa_ecoli  |
| P37052 | YCHJ_ECOLI | * P37052 | P0A9K9 | ychj_ecoli | slyd_ecoli  |
| P37052 | YCHJ_ECOLI | * P37052 | P77718 | ychj_ecoli | thii_ecoli  |
| P37052 | YCHJ_ECOLI | * P37052 | P0A9T6 | ychj_ecoli | ybaq_ecoli  |
| P37052 | YCHJ_ECOLI | * P37052 | P52052 | ychj_ecoli | yggr_ecoli  |
| P0A8L7 | YCIU_ECOLI | * P0A8L7 | P60785 | yciu_ecoli | lepa_ecoli  |
| P0A8L7 | YCIU_ECOLI | * P0A8L7 | P0AFG8 | yciu_ecoli | odp1_ecoli  |
| P0A8L7 | YCIU_ECOLI | * P0A8L7 | P0AFG8 | yciu_ecoli | odp1_ecoli  |
| P0A8L7 | YCIU_ECOLI | * P0A8L7 | P06959 | yciu_ecoli | odp2_ecoli  |
| P0A8L7 | YCIU_ECOLI | * P0A8L7 | P0AG44 | yciu_ecoli | rl17_ecoli  |
| P0A8L7 | YCIU_ECOLI | * P0A8L7 | P0A7R5 | yciu_ecoli | rs10_ecoli  |
| P76044 | YCJR_ECOLI | none     |        |            |             |
| P77154 | YCJT_ECOLI | none     |        |            |             |
| P77615 | YCJW_ECOLI | * P77615 | P0AC41 | ycjw_ecoli | dhsa_ecoli  |
| P77615 | YCJW_ECOLI | * P77615 | P18843 | ycjw_ecoli | nade_ecoli  |
| P77615 | YCJW_ECOLI | * P77615 | P52125 | ycjw_ecoli | yfjj_ecoli  |
| P77333 | YCJZ_ECOLI | * P77333 | P0A717 | ycjz_ecoli | kprs_ecoli  |

|        |            |   |        |        |            |             |
|--------|------------|---|--------|--------|------------|-------------|
| P77333 | YCJZ_ECOLI | * | P77333 | P60422 | ycjz_ecoli | rl2_ecoli   |
| P77333 | YCJZ_ECOLI | * | P77333 | P36999 | ycjz_ecoli | rlma_ecoli  |
| P77333 | YCJZ_ECOLI | * | P77333 | P0A7V0 | ycjz_ecoli | rs2_ecoli   |
| P77333 | YCJZ_ECOLI | * | P77333 | P76419 | ycjz_ecoli | yegv_ecoli  |
| P38394 | YDAE_ECOLI | * | P38394 | P33997 | ydae_ecoli | alpa_ecoli  |
| P38394 | YDAE_ECOLI | * | P38394 | P18843 | ydae_ecoli | nade_ecoli  |
| P38394 | YDAE_ECOLI | * | P38394 | P60422 | ydae_ecoli | rl2_ecoli   |
| P38394 | YDAE_ECOLI | * | P38394 | P0AA43 | ydae_ecoli | rsua_ecoli  |
| P76053 | YDAL_ECOLI |   | none   |        |            |             |
| P76069 | YDAY_ECOLI | * | P76069 | P0A6Y8 | yday_ecoli | dnak_ecoli  |
| P76069 | YDAY_ECOLI | * | P76069 | P18843 | yday_ecoli | nade_ecoli  |
| P76069 | YDAY_ECOLI | * | P76069 | P0AG55 | yday_ecoli | rl6_ecoli   |
| P76076 | YDBL_ECOLI |   | none   |        |            |             |
| P0ACW6 | YDCH_ECOLI |   | none   |        |            |             |
| P76103 | YDCO_ECOLI |   | none   |        |            |             |
| P77730 | YDCR_ECOLI | * | P77730 | P0A6F5 | ydcr_ecoli | ch60_ecoli  |
| P77156 | YDCU_ECOLI |   | none   |        |            |             |
| P31826 | YDDA_ECOLI |   | none   |        |            |             |
| P37757 | YDDE_ECOLI | * | P37757 | P09831 | ydde_ecoli | gltb_ecoli  |
| P37757 | YDDE_ECOLI | * | P37757 | P30958 | ydde_ecoli | mfd_ecoli   |
| P37757 | YDDE_ECOLI | * | P37757 | P18843 | ydde_ecoli | nade_ecoli  |
| P37757 | YDDE_ECOLI | * | P37757 | P0A8V2 | ydde_ecoli | rpob_ecoli  |
| P37757 | YDDE_ECOLI | * | P37757 | P76578 | ydde_ecoli | yfhm_ecoli  |
| P39831 | YDFG_ECOLI | * | P39831 | P31224 | ydfg_ecoli | acrb_ecoli  |
| P39831 | YDFG_ECOLI | * | P39831 | P35340 | ydfg_ecoli | ahpf_ecoli  |
| P39831 | YDFG_ECOLI | * | P39831 | P00722 | ydfg_ecoli | bgal_ecoli  |
| P39831 | YDFG_ECOLI | * | P39831 | P0A6F5 | ydfg_ecoli | ch60_ecoli  |
| P39831 | YDFG_ECOLI | * | P39831 | P18843 | ydfg_ecoli | nade_ecoli  |
| P39831 | YDFG_ECOLI | * | P39831 | P20966 | ydfg_ecoli | ptfbc_ecoli |
| P39831 | YDFG_ECOLI | * | P39831 | P16916 | ydfg_ecoli | rhsa_ecoli  |
| P64463 | YDFZ_ECOLI | * | P64463 | P00722 | ydfz_ecoli | bgal_ecoli  |
| P64463 | YDFZ_ECOLI | * | P64463 | P54746 | ydfz_ecoli | mngb_ecoli  |
| P64463 | YDFZ_ECOLI | * | P64463 | P18843 | ydfz_ecoli | nade_ecoli  |

|        |            |   |        |        |            |             |
|--------|------------|---|--------|--------|------------|-------------|
| P64463 | YDFZ_ECOLI | * | P64463 | P0ABL5 | ydfz_ecoli | napc_ecoli  |
| P64463 | YDFZ_ECOLI | * | P64463 | P15288 | ydfz_ecoli | pepd_ecoli  |
| P64463 | YDFZ_ECOLI | * | P64463 | P09373 | ydfz_ecoli | pflb_ecoli  |
| P64463 | YDFZ_ECOLI | * | P64463 | P31828 | ydfz_ecoli | pqq1_ecoli  |
| P64463 | YDFZ_ECOLI | * | P64463 | P0AAS9 | ydfz_ecoli | ybdd_ecoli  |
| P64463 | YDFZ_ECOLI | * | P64463 | P77536 | ydfz_ecoli | ykgf_ecoli  |
| P76177 | YDGH_ECOLI |   | none   |        |            |             |
| P77552 | YDHQ_ECOLI | * | P77552 | P0A6Y8 | ydhq_ecoli | dnak_ecoli  |
| P77552 | YDHQ_ECOLI | * | P77552 | P0A6M8 | ydhq_ecoli | efg_ecoli   |
| P77552 | YDHQ_ECOLI | * | P77552 | P0A9P9 | ydhq_ecoli | idno_ecoli  |
| P77552 | YDHQ_ECOLI | * | P77552 | P0AF06 | ydhq_ecoli | motb_ecoli  |
| P77552 | YDHQ_ECOLI | * | P77552 | P18843 | ydhq_ecoli | nade_ecoli  |
| P77552 | YDHQ_ECOLI | * | P77552 | P0A763 | ydhq_ecoli | ndk_ecoli   |
| P77552 | YDHQ_ECOLI | * | P77552 | P0AFA5 | ydhq_ecoli | nfrb_ecoli  |
| P77552 | YDHQ_ECOLI | * | P77552 | P27129 | ydhq_ecoli | rfaj_ecoli  |
| P77552 | YDHQ_ECOLI | * | P77552 | P0A7L0 | ydhq_ecoli | rl1_ecoli   |
| P77552 | YDHQ_ECOLI | * | P77552 | P0A7J7 | ydhq_ecoli | rl11_ecoli  |
| P77552 | YDHQ_ECOLI | * | P77552 | P0ADY3 | ydhq_ecoli | rl14_ecoli  |
| P77552 | YDHQ_ECOLI | * | P77552 | P0A7V0 | ydhq_ecoli | rs2_ecoli   |
| P77552 | YDHQ_ECOLI | * | P77552 | P43672 | ydhq_ecoli | uup_ecoli   |
| P77552 | YDHQ_ECOLI | * | P77552 | P08245 | ydhq_ecoli | ycih_ecoli  |
| P0ACX3 | YDHR_ECOLI | * | P0ACX3 | P0A6Y8 | ydhr_ecoli | dnak_ecoli  |
| P0ACX3 | YDHR_ECOLI | * | P0ACX3 | P0A6Y8 | ydhr_ecoli | dnak_ecoli  |
| P0ACX3 | YDHR_ECOLI | * | P0ACX3 | P0A988 | ydhr_ecoli | dpo3b_ecoli |
| P76192 | YDHV_ECOLI |   | none   |        |            |             |
| P64476 | YDIH_ECOLI | * | P64476 | P0CE47 | ydih_ecoli | eftu1_ecoli |
| P64476 | YDIH_ECOLI | * | P64476 | P67910 | ydih_ecoli | hldd_ecoli  |
| P64476 | YDIH_ECOLI | * | P64476 | P37692 | ydih_ecoli | rfaf_ecoli  |
| P64476 | YDIH_ECOLI | * | P64476 | P0A7V3 | ydih_ecoli | rs3_ecoli   |
| P64476 | YDIH_ECOLI | * | P64476 | P0A7W1 | ydih_ecoli | rs5_ecoli   |
| P64476 | YDIH_ECOLI | * | P64476 | P02359 | ydih_ecoli | rs7_ecoli   |
| P64476 | YDIH_ECOLI | * | P64476 | P0AG24 | ydih_ecoli | spot_ecoli  |
| P64476 | YDIH_ECOLI | * | P64476 | P0A850 | ydih_ecoli | tig_ecoli   |
| P64476 | YDIH_ECOLI | * | P64476 | P76092 | ydih_ecoli | ynbc_ecoli  |
| P77748 | YDIJ_ECOLI |   | none   |        |            |             |
| P0ACY1 | YDJA_ECOLI | * | P0ACY1 | P30859 | ydja_ecoli | arti_ecoli  |
| P0ACY1 | YDJA_ECOLI | * | P0ACY1 | P76290 | ydja_ecoli | cmoa_ecoli  |
| P0ACY1 | YDJA_ECOLI | * | P0ACY1 | P0A6Y8 | ydja_ecoli | dnak_ecoli  |



|        |            |   |        |        |            |             |
|--------|------------|---|--------|--------|------------|-------------|
| P0ACY1 | YDJA_ECOLI | * | P0ACY1 | P03023 | ydja_ecoli | laci_ecoli  |
| P0ACY1 | YDJA_ECOLI | * | P0ACY1 | P33345 | ydja_ecoli | molr_ecoli  |
| P0ACY1 | YDJA_ECOLI | * | P0ACY1 | P33228 | ydja_ecoli | rect_ecoli  |
| P0ACY1 | YDJA_ECOLI | * | P0ACY1 | P0A7V8 | ydja_ecoli | rs4_ecoli   |
| P0ACY1 | YDJA_ECOLI | * | P0ACY1 | P0AA43 | ydja_ecoli | rsua_ecoli  |
| P0ACY1 | YDJA_ECOLI | * | P0ACY1 | P67660 | ydja_ecoli | yhaj_ecoli  |
|        |            |   |        |        |            |             |
| P77721 | YDJF_ECOLI | * | P77721 | P0A9P0 | ydjf_ecoli | dldh_ecoli  |
| P77721 | YDJF_ECOLI | * | P77721 | P0A6Y8 | ydjf_ecoli | dnak_ecoli  |
| P77721 | YDJF_ECOLI | * | P77721 | P0ACF8 | ydjf_ecoli | hns_ecoli   |
| P77721 | YDJF_ECOLI | * | P77721 | P0A6H5 | ydjf_ecoli | hslu_ecoli  |
| P77721 | YDJF_ECOLI | * | P77721 | P0A717 | ydjf_ecoli | kprs_ecoli  |
| P77721 | YDJF_ECOLI | * | P77721 | P0A9M0 | ydjf_ecoli | lon_ecoli   |
| P77721 | YDJF_ECOLI | * | P77721 | P0A9X4 | ydjf_ecoli | mreb_ecoli  |
| P77721 | YDJF_ECOLI | * | P77721 | P0AFG6 | ydjf_ecoli | odo2_ecoli  |
| P77721 | YDJF_ECOLI | * | P77721 | P0A7G6 | ydjf_ecoli | reca_ecoli  |
| P77721 | YDJF_ECOLI | * | P77721 | P0ADY3 | ydjf_ecoli | rl14_ecoli  |
| P77721 | YDJF_ECOLI | * | P77721 | P0ACIO | ydjf_ecoli | rob_ecoli   |
| P77721 | YDJF_ECOLI | * | P77721 | P0A7V8 | ydjf_ecoli | rs4_ecoli   |
| P77721 | YDJF_ECOLI | * | P77721 | P21889 | ydjf_ecoli | syd_ecoli   |
| P77721 | YDJF_ECOLI | * | P77721 | P04152 | ydjf_ecoli | umuc_ecoli  |
|        |            |   |        |        |            |             |
| P39173 | YEAD_ECOLI | * | P39173 | P18843 | yead_ecoli | nade_ecoli  |
| P39173 | YEAD_ECOLI | * | P39173 | P28722 | yead_ecoli | yhca_ecoli  |
|        |            |   |        |        |            |             |
| P0ACY3 | YEAG_ECOLI | * | P0ACY3 | P15723 | yeag_ecoli | dgtp_ecoli  |
| P0ACY3 | YEAG_ECOLI | * | P0ACY3 | P0A988 | yeag_ecoli | dpo3b_ecoli |
| P0ACY3 | YEAG_ECOLI | * | P0ACY3 | P76056 | yeag_ecoli | intr_ecoli  |
| P0ACY3 | YEAG_ECOLI | * | P0ACY3 | P18843 | yeag_ecoli | nade_ecoli  |
|        |            |   |        |        |            |             |
| P64483 | YEAK_ECOLI | * | P64483 | P51981 | yeak_ecoli | aEEP_ecoli  |
| P64483 | YEAK_ECOLI | * | P64483 | P0A6F5 | yeak_ecoli | ch60_ecoli  |
| P64483 | YEAK_ECOLI | * | P64483 | P0A6B7 | yeak_ecoli | iscs_ecoli  |
| P64483 | YEAK_ECOLI | * | P64483 | P0A717 | yeak_ecoli | kprs_ecoli  |
| P64483 | YEAK_ECOLI | * | P64483 | P0A9X4 | yeak_ecoli | mreb_ecoli  |
| P64483 | YEAK_ECOLI | * | P64483 | P18843 | yeak_ecoli | nade_ecoli  |
| P64483 | YEAK_ECOLI | * | P64483 | P15288 | yeak_ecoli | pepd_ecoli  |
| P64483 | YEAK_ECOLI | * | P64483 | P0AA43 | yeak_ecoli | rsua_ecoli  |
| P64483 | YEAK_ECOLI | * | P64483 | P0AG14 | yeak_ecoli | sohb_ecoli  |
| P64483 | YEAK_ECOLI | * | P64483 | P07913 | yeak_ecoli | tdh_ecoli   |
| P64483 | YEAK_ECOLI | * | P64483 | P77221 | yeak_ecoli | yahg_ecoli  |
|        |            |   |        |        |            |             |
| P76254 | YEAX_ECOLI |   | none   |        |            |             |
|        |            |   |        |        |            |             |
| P76256 | YEAZ_ECOLI | * | P76256 | P06134 | yeaz_ecoli | ada_ecoli   |

|        |            |   |        |        |            |            |
|--------|------------|---|--------|--------|------------|------------|
| P76256 | YEAZ_ECOLI | * | P76256 | P0A6D7 | yeaz_ecoli | arok_ecoli |
| P76256 | YEAZ_ECOLI | * | P76256 | P76250 | yeaz_ecoli | dmlr_ecoli |
| P76256 | YEAZ_ECOLI | * | P76256 | P31574 | yeaz_ecoli | fixb_ecoli |
| P76256 | YEAZ_ECOLI | * | P76256 | P05852 | yeaz_ecoli | gcp_ecoli  |
| P76256 | YEAZ_ECOLI | * | P76256 | P30140 | yeaz_ecoli | thih_ecoli |
| P76256 | YEAZ_ECOLI | * | P76256 | P0AG80 | yeaz_ecoli | ugpb_ecoli |
| P76256 | YEAZ_ECOLI | * | P76256 | P76632 | yeaz_ecoli | ygck_ecoli |
| P76256 | YEAZ_ECOLI | * | P76256 | P39342 | yeaz_ecoli | yjgr_ecoli |
| P0A8A0 | YEBC_ECOLI | * | P0A8A0 | P0ABE7 | yebc_ecoli | c562_ecolx |
| P0A8A0 | YEBC_ECOLI | * | P0A8A0 | P0A6K3 | yebc_ecoli | def_ecoli  |
| P0A8A0 | YEBC_ECOLI | * | P0A8A0 | P0AET5 | yebc_ecoli | hded_ecoli |
| P0A8A0 | YEBC_ECOLI | * | P0A8A0 | P0A717 | yebc_ecoli | kprs_ecoli |
| P0A8A0 | YEBC_ECOLI | * | P0A8A0 | P18843 | yebc_ecoli | nade_ecoli |
| P0A8A0 | YEBC_ECOLI | * | P0A8A0 | P0ABL5 | yebc_ecoli | napc_ecoli |
| P0A8A0 | YEBC_ECOLI | * | P0A8A0 | P0ACP7 | yebc_ecoli | purr_ecoli |
| P0A8A0 | YEBC_ECOLI | * | P0A8A0 | P50457 | yebc_ecoli | puue_ecoli |
| P0A8A0 | YEBC_ECOLI | * | P0A8A0 | P0AG44 | yebc_ecoli | rl17_ecoli |
| P0A8A0 | YEBC_ECOLI | * | P0A8A0 | P0AG59 | yebc_ecoli | rs14_ecoli |
| P0A8A0 | YEBC_ECOLI | * | P0A8A0 | P0A7X3 | yebc_ecoli | rs9_ecoli  |
| P0A8A0 | YEBC_ECOLI | * | P0A8A0 | P0A905 | yebc_ecoli | slyb_ecoli |
| P0A8A0 | YEBC_ECOLI | * | P0A8A0 | P0A9K9 | yebc_ecoli | slyd_ecoli |
| P0A8A0 | YEBC_ECOLI | * | P0A8A0 | P0ACG1 | yebc_ecoli | stpa_ecoli |
| P0A8A0 | YEBC_ECOLI | * | P0A8A0 | P11875 | yebc_ecoli | syr_ecoli  |
| P0A8A0 | YEBC_ECOLI | * | P0A8A0 | P31142 | yebc_ecoli | thtm_ecoli |
| P76272 | YEBT_ECOLI |   | none   |        |            |            |
| P64503 | YEBV_ECOLI |   | none   |        |            |            |
| P37774 | YECC_ECOLI | * | P37774 | P0A6F5 | yecc_ecoli | ch60_ecoli |
| P37774 | YECC_ECOLI | * | P37774 | P0A9A9 | yecc_ecoli | fur_ecoli  |
| P37774 | YECC_ECOLI | * | P37774 | P0A7W1 | yecc_ecoli | rs5_ecoli  |
| P0ADI7 | YECD_ECOLI |   | none   |        |            |            |
| P31064 | YEDE_ECOLI |   | none   |        |            |            |
| P76321 | YEDN_ECOLI | * | P76321 | P0A6Y8 | yedn_ecoli | dnak_ecoli |
| P76321 | YEDN_ECOLI | * | P76321 | P18843 | yedn_ecoli | nade_ecoli |
| P76321 | YEDN_ECOLI | * | P76321 | P0AFJ5 | yedn_ecoli | phob_ecoli |
| P76335 | YEDS_ECOLI |   | none   |        |            |            |
| P0A8M6 | YEEX_ECOLI |   | none   |        |            |            |

|        |            |          |        |            |             |
|--------|------------|----------|--------|------------|-------------|
| P37749 | YFEG_ECOLI | * P37749 | P0A6F5 | yefg_ecoli | ch60_ecoli  |
| P37749 | YFEG_ECOLI | * P37749 | P76559 | yefg_ecoli | ypfg_ecoli  |
| P76393 | YEGI_ECOLI | none     |        |            |             |
| P33354 | YEHR_ECOLI | none     |        |            |             |
| P33355 | YEHS_ECOLI | none     |        |            |             |
| P76440 | YEIT_ECOLI | * P76440 | P25889 | yeit_ecoli | yeia_ecoli  |
| P33913 | YEJA_ECOLI | * P33913 | P0A6F5 | yeja_ecoli | ch60_ecoli  |
| P33913 | YEJA_ECOLI | * P33913 | P10408 | yeja_ecoli | seca_ecoli  |
| P0AD24 | YEJL_ECOLI | none     |        |            |             |
| P17994 | YFAA_ECOLI | * P17994 | P0A6F5 | yfaa_ecoli | ch60_ecoli  |
| P17994 | YFAA_ECOLI | * P17994 | P0AC41 | yfaa_ecoli | dhsa_ecoli  |
| P17994 | YFAA_ECOLI | * P17994 | P09832 | yfaa_ecoli | glt_d_ecoli |
| P17994 | YFAA_ECOLI | * P17994 | P60422 | yfaa_ecoli | rl2_ecoli   |
| P17994 | YFAA_ECOLI | * P17994 | P77698 | yfaa_ecoli | ybck_ecoli  |
| P0A8W8 | YFBU_ECOLI | none     |        |            |             |
| P0AD30 | YFCA_ECOLI | none     |        |            |             |
| P39199 | YFCB_ECOLI | * P39199 | P0A6Y8 | yfcb_ecoli | dnak_ecoli  |
| P39199 | YFCB_ECOLI | * P39199 | P76114 | yfcb_ecoli | mcbr_ecoli  |
| P39199 | YFCB_ECOLI | * P39199 | P60438 | yfcb_ecoli | rl3_ecoli   |
| P39199 | YFCB_ECOLI | * P39199 | P60438 | yfcb_ecoli | rl3_ecoli   |
| P39199 | YFCB_ECOLI | * P39199 | P0A7R5 | yfcb_ecoli | rs10_ecoli  |
| P39199 | YFCB_ECOLI | * P39199 | P76072 | yfcb_ecoli | stfr_ecoli  |
| P39199 | YFCB_ECOLI | * P39199 | P0A850 | yfcb_ecoli | tig_ecoli   |
| P39199 | YFCB_ECOLI | * P39199 | P0A850 | yfcb_ecoli | tig_ecoli   |
| P67095 | YFCE_ECOLI | none     |        |            |             |
| P0AD33 | YFCZ_ECOLI | * P0AD33 | P37330 | yfcz_ecoli | masz_ecoli  |
| P0AD33 | YFCZ_ECOLI | * P0AD33 | P09373 | yfcz_ecoli | pflb_ecoli  |
| P0AD33 | YFCZ_ECOLI | * P0AD33 | P0ADY7 | yfcz_ecoli | rl16_ecoli  |
| P0AD33 | YFCZ_ECOLI | * P0AD33 | P60422 | yfcz_ecoli | rl2_ecoli   |
| P0AD33 | YFCZ_ECOLI | * P0AD33 | P0A7V3 | yfcz_ecoli | rs3_ecoli   |
| P0AD33 | YFCZ_ECOLI | * P0AD33 | P39306 | yfcz_ecoli | ulaf_ecoli  |

|        |            |          |        |            |            |
|--------|------------|----------|--------|------------|------------|
| P76507 | YFDI_ECOLI | none     |        |            |            |
| P76549 | YFFR_ECOLI | none     |        |            |            |
| P76550 | YFFS_ECOLI | none     |        |            |            |
| P76576 | YFGM_ECOLI | * P76576 | P69407 | yfgm_ecoli | rscb_ecoli |
| P37767 | YFHH_ECOLI | none     |        |            |            |
| POAGJ5 | YFIF_ECOLI | * POAGJ5 | POAEB2 | yfif_ecoli | daca_ecoli |
| POAGJ5 | YFIF_ECOLI | * POAGJ5 | P0ACF0 | yfif_ecoli | dbha_ecoli |
| POAGJ5 | YFIF_ECOLI | * POAGJ5 | P0A9P6 | yfif_ecoli | dead_ecoli |
| POAGJ5 | YFIF_ECOLI | * POAGJ5 | P30128 | yfif_ecoli | greb_ecoli |
| POAGJ5 | YFIF_ECOLI | * POAGJ5 | P28631 | yfif_ecoli | holb_ecoli |
| POAGJ5 | YFIF_ECOLI | * POAGJ5 | P37182 | yfif_ecoli | hybd_ecoli |
| POAGJ5 | YFIF_ECOLI | * POAGJ5 | P0A6X7 | yfif_ecoli | ihfa_ecoli |
| POAGJ5 | YFIF_ECOLI | * POAGJ5 | P33362 | yfif_ecoli | osmf_ecoli |
| POAGJ5 | YFIF_ECOLI | * POAGJ5 | P23830 | yfif_ecoli | pss_ecoli  |
| POAGJ5 | YFIF_ECOLI | * POAGJ5 | P0A7L0 | yfif_ecoli | rl1_ecoli  |
| POAGJ5 | YFIF_ECOLI | * POAGJ5 | P0A7L0 | yfif_ecoli | rl1_ecoli  |
| POAGJ5 | YFIF_ECOLI | * POAGJ5 | P0ADY7 | yfif_ecoli | rl16_ecoli |
| POAGJ5 | YFIF_ECOLI | * POAGJ5 | P0AG44 | yfif_ecoli | rl17_ecoli |
| POAGJ5 | YFIF_ECOLI | * POAGJ5 | P0C018 | yfif_ecoli | rl18_ecoli |
| POAGJ5 | YFIF_ECOLI | * POAGJ5 | P60422 | yfif_ecoli | rl2_ecoli  |
| POAGJ5 | YFIF_ECOLI | * POAGJ5 | P60422 | yfif_ecoli | rl2_ecoli  |
| POAGJ5 | YFIF_ECOLI | * POAGJ5 | P60422 | yfif_ecoli | rl2_ecoli  |
| POAGJ5 | YFIF_ECOLI | * POAGJ5 | P0A7L3 | yfif_ecoli | rl20_ecoli |
| POAGJ5 | YFIF_ECOLI | * POAGJ5 | P61175 | yfif_ecoli | rl22_ecoli |
| POAGJ5 | YFIF_ECOLI | * POAGJ5 | P60438 | yfif_ecoli | rl3_ecoli  |
| POAGJ5 | YFIF_ECOLI | * POAGJ5 | P60438 | yfif_ecoli | rl3_ecoli  |
| POAGJ5 | YFIF_ECOLI | * POAGJ5 | P0AG55 | yfif_ecoli | rl6_ecoli  |
| POAGJ5 | YFIF_ECOLI | * POAGJ5 | P0A7R1 | yfif_ecoli | rl9_ecoli  |
| POAGJ5 | YFIF_ECOLI | * POAGJ5 | P75864 | yfif_ecoli | rlml_ecoli |
| POAGJ5 | YFIF_ECOLI | * POAGJ5 | P37765 | yfif_ecoli | rlub_ecoli |
| POAGJ5 | YFIF_ECOLI | * POAGJ5 | P0AA39 | yfif_ecoli | rluc_ecoli |
| POAGJ5 | YFIF_ECOLI | * POAGJ5 | P21499 | yfif_ecoli | rnr_ecoli  |
| POAGJ5 | YFIF_ECOLI | * POAGJ5 | P0A7R9 | yfif_ecoli | rs11_ecoli |
| POAGJ5 | YFIF_ECOLI | * POAGJ5 | P0A7S3 | yfif_ecoli | rs12_ecoli |
| POAGJ5 | YFIF_ECOLI | * POAGJ5 | P0A7S9 | yfif_ecoli | rs13_ecoli |
| POAGJ5 | YFIF_ECOLI | * POAGJ5 | P0A7S9 | yfif_ecoli | rs13_ecoli |
| POAGJ5 | YFIF_ECOLI | * POAGJ5 | P0AG59 | yfif_ecoli | rs14_ecoli |
| POAGJ5 | YFIF_ECOLI | * POAGJ5 | P0ADZ4 | yfif_ecoli | rs15_ecoli |
| POAGJ5 | YFIF_ECOLI | * POAGJ5 | P0A7T3 | yfif_ecoli | rs16_ecoli |
| POAGJ5 | YFIF_ECOLI | * POAGJ5 | P0A7T7 | yfif_ecoli | rs18_ecoli |

|        |            |      |        |        |            |            |
|--------|------------|------|--------|--------|------------|------------|
| P0AGJ5 | YFIF_ECOLI | *    | P0AGJ5 | P0A7U3 | yfif_ecoli | rs19_ecoli |
| P0AGJ5 | YFIF_ECOLI | *    | P0AGJ5 | P0A7U7 | yfif_ecoli | rs20_ecoli |
| P0AGJ5 | YFIF_ECOLI | *    | P0AGJ5 | P68679 | yfif_ecoli | rs21_ecoli |
| P0AGJ5 | YFIF_ECOLI | *    | P0AGJ5 | P0A7V3 | yfif_ecoli | rs3_ecoli  |
| P0AGJ5 | YFIF_ECOLI | *    | P0AGJ5 | P0A7V8 | yfif_ecoli | rs4_ecoli  |
| P0AGJ5 | YFIF_ECOLI | *    | P0AGJ5 | P0A7V8 | yfif_ecoli | rs4_ecoli  |
| P0AGJ5 | YFIF_ECOLI | *    | P0AGJ5 | P0A7V8 | yfif_ecoli | rs4_ecoli  |
| P0AGJ5 | YFIF_ECOLI | *    | P0AGJ5 | P0A7W1 | yfif_ecoli | rs5_ecoli  |
| P0AGJ5 | YFIF_ECOLI | *    | P0AGJ5 | P0A7W1 | yfif_ecoli | rs5_ecoli  |
| P0AGJ5 | YFIF_ECOLI | *    | P0AGJ5 | P02358 | yfif_ecoli | rs6_ecoli  |
| P0AGJ5 | YFIF_ECOLI | *    | P0AGJ5 | P02358 | yfif_ecoli | rs6_ecoli  |
| P0AGJ5 | YFIF_ECOLI | *    | P0AGJ5 | P02359 | yfif_ecoli | rs7_ecoli  |
| P0AGJ5 | YFIF_ECOLI | *    | P0AGJ5 | P02359 | yfif_ecoli | rs7_ecoli  |
| P0AGJ5 | YFIF_ECOLI | *    | P0AGJ5 | P0A7W7 | yfif_ecoli | rs8_ecoli  |
| P0AGJ5 | YFIF_ECOLI | *    | P0AGJ5 | P77499 | yfif_ecoli | sufc_ecoli |
| P0AGJ5 | YFIF_ECOLI | *    | P0AGJ5 | P75749 | yfif_ecoli | ybgp_ecoli |
| P0AGJ5 | YFIF_ECOLI | *    | P0AGJ5 | P76578 | yfif_ecoli | yfhm_ecoli |
| P0AC02 | YFIO_ECOLI | none |        |        |            |            |
| Q47319 | YFIP_ECOLI | none |        |        |            |            |
| P52124 | YFJI_ECOLI | none |        |        |            |            |
| P52131 | YFJP_ECOLI | none |        |        |            |            |
| P52138 | YFJW_ECOLI | none |        |        |            |            |
| P0AD53 | YGAC_ECOLI | none |        |        |            |            |
| P65807 | YGEY_ECOLI | *    | P65807 | P31554 | ygey_ecoli | lptd_ecoli |
| P65807 | YGEY_ECOLI | *    | P65807 | P06721 | ygey_ecoli | metc_ecoli |
| P65807 | YGEY_ECOLI | *    | P65807 | P37906 | ygey_ecoli | puub_ecoli |
| P65807 | YGEY_ECOLI | *    | P65807 | P24215 | ygey_ecoli | uxua_ecoli |
| P0A8C4 | YGFB_ECOLI | none |        |        |            |            |
| Q46811 | YGFK_ECOLI | none |        |        |            |            |
| P0ADE8 | YGFZ_ECOLI | *    | P0ADE8 | P18843 | ygfz_ecoli | nade_ecoli |
| P0ADE8 | YGFZ_ECOLI | *    | P0ADE8 | P0A7L3 | ygfz_ecoli | rl20_ecoli |
| P0ADE8 | YGFZ_ECOLI | *    | P0ADE8 | P76518 | ygfz_ecoli | yfde_ecoli |
| P0ADE8 | YGFZ_ECOLI | *    | P0ADE8 | P0ADK8 | ygfz_ecoli | yibl_ecoli |
| P0AG84 | YGHA_ECOLI | *    | P0AG84 | P0A6Y8 | ygha_ecoli | dnak_ecoli |

|        |            |   |        |        |            |             |
|--------|------------|---|--------|--------|------------|-------------|
| P0AG84 | YGHA_ECOLI | * | P0AG84 | P0A988 | ygha_ecoli | dpo3b_ecoli |
| P0AG84 | YGHA_ECOLI | * | P0AG84 | P0ACL7 | ygha_ecoli | lldr_ecoli  |
| P0AG84 | YGHA_ECOLI | * | P0AG84 | P39376 | ygha_ecoli | yjie_ecoli  |
| Q46841 | YGHQ_ECOLI |   | none   |        |            |             |
| P0ADU2 | YGIN_ECOLI | * | P0ADU2 | P18843 | ygin_ecoli | nade_ecoli  |
| Q46864 | YGIT_ECOLI |   | none   |        |            |             |
| P0ADU5 | YGIW_ECOLI |   | none   |        |            |             |
| P63417 | YHBS_ECOLI | * | P63417 | P0ABE7 | yhbs_ecoli | c562_ecolx  |
| P63417 | YHBS_ECOLI | * | P63417 | P0AG44 | yhbs_ecoli | rl17_ecoli  |
| P63417 | YHBS_ECOLI | * | P63417 | P0A7K6 | yhbs_ecoli | rl19_ecoli  |
| P63417 | YHBS_ECOLI | * | P63417 | P60422 | yhbs_ecoli | rl2_ecoli   |
| P63417 | YHBS_ECOLI | * | P63417 | P0A7X3 | yhbs_ecoli | rs9_ecoli   |
| P63417 | YHBS_ECOLI | * | P63417 | P64599 | yhbs_ecoli | yhbt_ecoli  |
| P63417 | YHBS_ECOLI | * | P63417 | P32685 | yhbs_ecoli | yjbd_ecoli  |
| P13518 | YHDA_ECOLI |   | none   |        |            |             |
| P25536 | YHDE_ECOLI | * | P25536 | P15288 | yhde_ecoli | pepd_ecoli  |
| P25536 | YHDE_ECOLI | * | P25536 | P40719 | yhde_ecoli | qsec_ecoli  |
| P45766 | YHDW_ECOLI |   | none   |        |            |             |
| P64624 | YHEO_ECOLI |   | none   |        |            |             |
| P45524 | YHET_ECOLI | * | P45524 | P0A6F5 | yhet_ecoli | ch60_ecoli  |
| P45524 | YHET_ECOLI | * | P45524 | P0A7U7 | yhet_ecoli | rs20_ecoli  |
| P64627 | YHFL_ECOLI |   | none   |        |            |             |
| P46837 | YHGF_ECOLI | * | P46837 | P0AEF0 | yhgf_ecoli | dnac_ecoli  |
| P46837 | YHGF_ECOLI | * | P46837 | P04805 | yhgf_ecoli | syecoli     |
| P37613 | YHHK_ECOLI | * | P37613 | Q47151 | yhhk_ecoli | yafli_ecoli |
| P37614 | YHHL_ECOLI |   | none   |        |            |             |
| P37624 | YHIH_ECOLI |   | none   |        |            |             |
| P68567 | YHIQ_ECOLI |   | none   |        |            |             |



|        |            |          |        |            |            |
|--------|------------|----------|--------|------------|------------|
| P37660 | YHJV_ECOLI | none     |        |            |            |
| P0A9V5 | YIAG_ECOLI | * P0A9V5 | P0AD53 | yiag_ecoli | ygac_ecoli |
| P0A9V5 | YIAG_ECOLI | * P0A9V5 | P0ADK8 | yiag_ecoli | yibl_ecoli |
| P37671 | YIAJ_ECOLI | none     |        |            |            |
| P0ADK6 | YIBA_ECOLI | * P0ADK6 | P0A6Y8 | yiba_ecoli | dnak_ecoli |
| P0ADK6 | YIBA_ECOLI | * P0ADK6 | P17888 | yiba_ecoli | pria_ecoli |
| P0ADK6 | YIBA_ECOLI | * P0ADK6 | P0A7V0 | yiba_ecoli | rs2_ecoli  |
| P0ADK6 | YIBA_ECOLI | * P0ADK6 | P43672 | yiba_ecoli | uup_ecoli  |
| P0ACA1 | YIBF_ECOLI | * P0ACA1 | P00722 | yibf_ecoli | bgal_ecoli |
| P0AFV0 | YIBH_ECOLI | none     |        |            |            |
| P0AG27 | YIBN_ECOLI | none     |        |            |            |
| P0AGE6 | YIEF_ECOLI | * P0AGE6 | P42604 | yief_ecoli | uxaa_ecoli |
| P0AGE6 | YIEF_ECOLI | * P0AGE6 | P77247 | yief_ecoli | ynic_ecoli |
| P31471 | YIEL_ECOLI | none     |        |            |            |
| P32141 | YIHT_ECOLI | * P32141 | P0AE08 | yiht_ecoli | ahpc_ecoli |
| P32141 | YIHT_ECOLI | * P32141 | P0A6K3 | yiht_ecoli | def_ecoli  |
| P32141 | YIHT_ECOLI | * P32141 | P07821 | yiht_ecoli | fhuc_ecoli |
| P32141 | YIHT_ECOLI | * P32141 | P18843 | yiht_ecoli | nade_ecoli |
| P32141 | YIHT_ECOLI | * P32141 | P36566 | yiht_ecoli | smta_ecoli |
| P32162 | YIIS_ECOLI | * P32162 | P0AAM1 | yiis_ecoli | cybh_ecoli |
| P32162 | YIIS_ECOLI | * P32162 | P13035 | yiis_ecoli | glpd_ecoli |
| P32162 | YIIS_ECOLI | * P32162 | P0A6W5 | yiis_ecoli | grea_ecoli |
| P32162 | YIIS_ECOLI | * P32162 | P0ACF8 | yiis_ecoli | hns_ecoli  |
| P32162 | YIIS_ECOLI | * P32162 | P0AAC8 | yiis_ecoli | isca_ecoli |
| P32162 | YIIS_ECOLI | * P32162 | P37330 | yiis_ecoli | masz_ecoli |
| P32162 | YIIS_ECOLI | * P32162 | P18843 | yiis_ecoli | nade_ecoli |
| P32162 | YIIS_ECOLI | * P32162 | P76078 | yiis_ecoli | paab_ecoli |
| P32162 | YIIS_ECOLI | * P32162 | P09373 | yiis_ecoli | pflb_ecoli |
| P32162 | YIIS_ECOLI | * P32162 | P0AFJ5 | yiis_ecoli | phob_ecoli |
| P32162 | YIIS_ECOLI | * P32162 | P32156 | yiis_ecoli | rham_ecoli |
| P32162 | YIIS_ECOLI | * P32162 | P60723 | yiis_ecoli | rl4_ecoli  |
| P32162 | YIIS_ECOLI | * P32162 | P0AG55 | yiis_ecoli | rl6_ecoli  |
| P32162 | YIIS_ECOLI | * P32162 | P0A7S9 | yiis_ecoli | rs13_ecoli |
| P32162 | YIIS_ECOLI | * P32162 | P0A7V0 | yiis_ecoli | rs2_ecoli  |
| P32162 | YIIS_ECOLI | * P32162 | P0A7U7 | yiis_ecoli | rs20_ecoli |

|        |            |   |        |        |            |            |
|--------|------------|---|--------|--------|------------|------------|
| P32162 | YIIS_ECOLI | * | P32162 | P0A7W1 | yiis_ecoli | rs5_ecoli  |
| P32162 | YIIS_ECOLI | * | P32162 | P0A6A0 | yiis_ecoli | ubib_ecoli |
| P32162 | YIIS_ECOLI | * | P32162 | P0AAB8 | yiis_ecoli | uspd_ecoli |
| P32162 | YIIS_ECOLI | * | P32162 | P0AB61 | yiis_ecoli | ycin_ecoli |
| P32162 | YIIS_ECOLI | * | P32162 | P37640 | yiis_ecoli | yhjb_ecoli |
| P32162 | YIIS_ECOLI | * | P32162 | P64562 | yiis_ecoli | yqfe_ecoli |
| P32162 | YIIS_ECOLI | * | P32162 | P0AF36 | yiis_ecoli | zapb_ecoli |
| P32677 | YIJO_ECOLI |   | none   |        |            |            |
| P0AF50 | YJBR_ECOLI | * | P0AF50 | P0A7D7 | yjbr_ecoli | pur7_ecoli |
| P0ACU7 | YJDC_ECOLI |   | none   |        |            |            |
| P0AF67 | YJEE_ECOLI | * | P0AF67 | P0A6F5 | yjee_ecoli | ch60_ecoli |
| P0AF67 | YJEE_ECOLI | * | P0AF67 | P69910 | yjee_ecoli | dceb_ecoli |
| P0AF67 | YJEE_ECOLI | * | P0AF67 | P0A6Y8 | yjee_ecoli | dnak_ecoli |
| P0AF67 | YJEE_ECOLI | * | P0AF67 | P0A9B2 | yjee_ecoli | g3p1_ecoli |
| P0AF67 | YJEE_ECOLI | * | P0AF67 | P25665 | yjee_ecoli | mete_ecoli |
| P0AF67 | YJEE_ECOLI | * | P0AF67 | P18843 | yjee_ecoli | nade_ecoli |
| P0AF67 | YJEE_ECOLI | * | P0AF67 | P76078 | yjee_ecoli | paab_ecoli |
| P0AF67 | YJEE_ECOLI | * | P0AF67 | P76084 | yjee_ecoli | paai_ecoli |
| P0AF67 | YJEE_ECOLI | * | P0AF67 | P09373 | yjee_ecoli | pflb_ecoli |
| P0AF67 | YJEE_ECOLI | * | P0AF67 | P0A7D4 | yjee_ecoli | pura_ecoli |
| P0AF67 | YJEE_ECOLI | * | P0AF67 | P0ADY3 | yjee_ecoli | rl14_ecoli |
| P0AF67 | YJEE_ECOLI | * | P0AF67 | P0A7K2 | yjee_ecoli | rl7_ecoli  |
| P0AF67 | YJEE_ECOLI | * | P0AF67 | P0AG67 | yjee_ecoli | rs1_ecoli  |
| P0AF67 | YJEE_ECOLI | * | P0AF67 | P0A7V0 | yjee_ecoli | rs2_ecoli  |
| P0AF67 | YJEE_ECOLI | * | P0AF67 | P0A7V3 | yjee_ecoli | rs3_ecoli  |
| P0AF67 | YJEE_ECOLI | * | P0AF67 | P0A7V8 | yjee_ecoli | rs4_ecoli  |
| P0AF67 | YJEE_ECOLI | * | P0AF67 | P0A7W1 | yjee_ecoli | rs5_ecoli  |
| P0AF67 | YJEE_ECOLI | * | P0AF67 | P0ADQ2 | yjee_ecoli | yiid_ecoli |
| P0AF67 | YJEE_ECOLI | * | P0AF67 | P31806 | yjee_ecoli | yjef_ecoli |
| P0AF67 | YJEE_ECOLI | * | P0AF67 | P39283 | yjee_ecoli | yjen_ecoli |
| P31806 | YJEF_ECOLI | * | P31806 | P0A9P0 | yjef_ecoli | dldh_ecoli |
| P31806 | YJEF_ECOLI | * | P31806 | P0A9P0 | yjef_ecoli | dldh_ecoli |
| P31806 | YJEF_ECOLI | * | P31806 | P22186 | yjef_ecoli | mraz_ecoli |
| P31806 | YJEF_ECOLI | * | P31806 | P22186 | yjef_ecoli | mraz_ecoli |
| P31806 | YJEF_ECOLI | * | P31806 | P06959 | yjef_ecoli | odp2_ecoli |
| P31806 | YJEF_ECOLI | * | P31806 | P06959 | yjef_ecoli | odp2_ecoli |
| P31806 | YJEF_ECOLI | * | P31806 | P16918 | yjef_ecoli | rhsc_ecoli |
| P31806 | YJEF_ECOLI | * | P31806 | P76578 | yjef_ecoli | yfhm_ecoli |
| P31806 | YJEF_ECOLI | * | P31806 | P0AF67 | yjef_ecoli | yjee_ecoli |

|        |            |          |        |            |            |
|--------|------------|----------|--------|------------|------------|
| P37772 | YJFF_ECOLI | none     |        |            |            |
| P0AF90 | YJGD_ECOLI | * P0AF90 | P0A9P0 | yjgd_ecoli | dldh_ecoli |
| P0AF90 | YJGD_ECOLI | * P0AF90 | P45539 | yjgd_ecoli | frla_ecoli |
| P0AF90 | YJGD_ECOLI | * P0AF90 | P0A6W9 | yjgd_ecoli | gsh1_ecoli |
| P0AF90 | YJGD_ECOLI | * P0AF90 | P60560 | yjgd_ecoli | guac_ecoli |
| P0AF90 | YJGD_ECOLI | * P0AF90 | P37773 | yjgd_ecoli | mpl_ecoli  |
| P0AF90 | YJGD_ECOLI | * P0AF90 | P06959 | yjgd_ecoli | odp2_ecoli |
| P0AF90 | YJGD_ECOLI | * P0AF90 | P77247 | yjgd_ecoli | ynic_ecoli |
| P0AF93 | YJGF_ECOLI | none     |        |            |            |
| P0AF96 | YJGK_ECOLI | none     |        |            |            |
| P39353 | YJHC_ECOLI | none     |        |            |            |
| P39356 | YJHU_ECOLI | none     |        |            |            |
| P24203 | YJIA_ECOLI | none     |        |            |            |
| P39376 | YJIE_ECOLI | * P39376 | P0A6F5 | yjie_ecoli | ch60_ecoli |
| P39384 | YJIM_ECOLI | none     |        |            |            |
| P37342 | YJJI_ECOLI | * P37342 | P0A6Y8 | yjji_ecoli | dnak_ecoli |
| P0A9W3 | YJJK_ECOLI | * P0A9W3 | P18843 | yjkk_ecoli | nade_ecoli |
| P39411 | YJJX_ECOLI | none     |        |            |            |
| P75678 | YKFA_ECOLI | none     |        |            |            |
| P77252 | YKGE_ECOLI | none     |        |            |            |
| P75919 | YMDC_ECOLI | none     |        |            |            |
| P0AEB5 | YNAI_ECOLI | none     |        |            |            |
| P76116 | YNCE_ECOLI | * P76116 | P0A964 | ynce_ecoli | chew_ecoli |
| P0AAJ1 | YNFG_ECOLI | none     |        |            |            |
| P0AEB7 | YOAB_ECOLI | none     |        |            |            |
| P64508 | YOBF_ECOLI | none     |        |            |            |

|        |            |          |        |            |            |  |
|--------|------------|----------|--------|------------|------------|--|
| Q2EES6 | YOHO_ECOLI | none     |        |            |            |  |
| P76561 | YPFH_ECOLI | none     |        |            |            |  |
| P10018 | YPR2_ECOLX | none     |        |            |            |  |
| P0A8W5 | YQGE_ECOLI | * P0A8W5 | P0A9A9 | yqge_ecoli | fur_ecoli  |  |
| P0A8W5 | YQGE_ECOLI | * P0A8W5 | P77188 | yqge_ecoli | matc_ecoli |  |
| P0A8W5 | YQGE_ECOLI | * P0A8W5 | P33602 | yqge_ecoli | nuog_ecoli |  |
| P0A8W5 | YQGE_ECOLI | * P0A8W5 | P15288 | yqge_ecoli | pepd_ecoli |  |
| P0A8W5 | YQGE_ECOLI | * P0A8W5 | P02413 | yqge_ecoli | rl15_ecoli |  |
| P0A8W5 | YQGE_ECOLI | * P0A8W5 | P60422 | yqge_ecoli | rl2_ecoli  |  |
| P0A8W5 | YQGE_ECOLI | * P0A8W5 | P0A7V0 | yqge_ecoli | rs2_ecoli  |  |
| P0A8W5 | YQGE_ECOLI | * P0A8W5 | P0AGL7 | yqge_ecoli | rsme_ecoli |  |
| P0A8W5 | YQGE_ECOLI | * P0A8W5 | P52645 | yqge_ecoli | ydbh_ecoli |  |
| Q46856 | YQHD_ECOLI | * Q46856 | P13035 | yqhd_ecoli | glpd_ecoli |  |
| Q46856 | YQHD_ECOLI | * Q46856 | P0A9K9 | yqhd_ecoli | slyd_ecoli |  |
| P77306 | YQIK_ECOLI | * P77306 | P31552 | yqik_ecoli | caic_ecoli |  |
| P77306 | YQIK_ECOLI | * P77306 | P38104 | yqik_ecoli | rspa_ecoli |  |
| P77306 | YQIK_ECOLI | * P77306 | P77129 | yqik_ecoli | ylbe_ecoli |  |
| P77306 | YQIK_ECOLI | * P77306 | P77269 | yqik_ecoli | yphf_ecoli |  |
| P64581 | YQJD_ECOLI | none     |        |            |            |  |
| P64588 | YQJI_ECOLI | * P64588 | P0AEU0 | yqji_ecoli | hisj_ecoli |  |
| P64588 | YQJI_ECOLI | * P64588 | P0AA16 | yqji_ecoli | ompr_ecoli |  |
| P21314 | YR75_ECOLX | * none   |        |            |            |  |
| P21324 | YR7J_ECOLX | *        |        |            |            |  |
| P0A9W9 | YRDA_ECOLI | * none   |        |            |            |  |
| P45751 | YRFB_ECOLI | * none   |        |            |            |  |
| P64636 | YRFG_ECOLI | * none   |        |            |            |  |
| P39187 | YTFJ_ECOLI | * none   |        |            |            |  |
| P0ADE4 | YTFM_ECOLI | * P0ADE4 | P0A6F5 | ytfm_ecoli | ch60_ecoli |  |
| P39321 | YTFN_ECOLI | * none   |        |            |            |  |

|        |            |          |        |            |            |  |
|--------|------------|----------|--------|------------|------------|--|
| P0AE48 | YTFP_ECOLI | * none   |        |            |            |  |
| Q6BEX0 | YTFR_ECOLI | * none   |        |            |            |  |
| P34211 | YUAR_ECOLI | * none   |        |            |            |  |
| Q9S4X2 | YUBD_ECOLI | * none   |        |            |            |  |
| Q9S4W2 | YUBM_ECOLI | * none   |        |            |            |  |
| P0ADS2 | ZAPA_ECOLI | * P0ADS2 | P31551 | zapa_ecoli | caid_ecoli |  |
| P0ADS2 | ZAPA_ECOLI | * P0ADS2 | P0A722 | zapa_ecoli | lpxa_ecoli |  |
| P0ADS2 | ZAPA_ECOLI | * P0ADS2 | P0A884 | zapa_ecoli | tysy_ecoli |  |
| Q1JQN5 | ZAPA_ECOLX |          |        |            |            |  |
| P0AF36 | ZAPB_ECOLI | * none   |        |            |            |  |
| P39832 | ZNUB_ECOLI | * none   |        |            |            |  |

| Alias interactor A | Alias interactor B | Interaction detection method                      |
|--------------------|--------------------|---------------------------------------------------|
| gnd                | nadE               | pull down                                         |
| gnd                | pckA               | comigration in non denaturing gel electrophoresis |
| gnd                | pepD               | blue native page                                  |
| pgl                | fdnH               | pull down                                         |
| pgl                | prs                | pull down                                         |
| pgl                | nadE               | pull down                                         |
| pgl                | rsuA               | pull down                                         |
| pgl                | yfdO               | pull down                                         |
| aspC               | nadE               | pull down                                         |
| accA               | accD               | pull down                                         |
| accA               | accD               | pull down                                         |
| accA               | accD               | pull down                                         |
| accA               | groL               | pull down                                         |
| accA               | dnaK               | pull down                                         |
| accA               | hemF               | pull down                                         |
| accA               | infB               | pull down                                         |
| accA               | prs                | pull down                                         |
| accA               | rplR               | pull down                                         |
| accA               | rplV               | pull down                                         |
| accA               | rplW               | pull down                                         |
| accA               | rplC               | pull down                                         |
| accA               | lysU               | pull down                                         |
| accC               | accA               | pull down                                         |
| accC               | accD               | pull down                                         |
| accC               | accB               | pull down                                         |
| accC               | accB               | pull down                                         |
| accC               | accB               | pull down                                         |
| accC               | cysM               | pull down                                         |
| accC               | dnaK               | pull down                                         |
| accC               | dnaN               | pull down                                         |
| accC               | greA               | pull down                                         |
| accC               | nadE               | pull down                                         |
| accC               | rplC               | pull down                                         |
| accC               | yhdY               | pull down                                         |
| accC               | yiiQ               | pull down                                         |
| accC               | yiiS               | pull down                                         |
| accC               | yraN               | pull down                                         |
| aceA               | napA               | pull down                                         |
| aceA               | hisS               | pull down                                         |



|      |       |                                    |
|------|-------|------------------------------------|
| ackA | ahpC  | pull down                          |
| ackA | def   | pull down                          |
| ackA | fur   | pull down                          |
| ackA | glyA  | pull down                          |
| ackA | greA  | pull down                          |
| ackA | greB  | pull down                          |
| ackA | hemX  | pull down                          |
| ackA | hyfE  | pull down                          |
| ackA | kdsD  | pull down                          |
| ackA | moaC  | pull down                          |
| ackA | rpmB  | pull down                          |
| ackA | ybgA  | pull down                          |
|      |       |                                    |
| acnA | nadE  | pull down                          |
|      |       |                                    |
| acnB | sbcC  | pull down                          |
| acnB | speD  | pull down                          |
| acnB | ulaB  | pull down                          |
|      |       |                                    |
| acpP | aas   | pull down                          |
| acpP | accA  | pull down                          |
| acpP | acpS  | pull down                          |
| acpP | acpS  | pull down                          |
| acpP | yccX  | pull down                          |
| acpP | aidB  | pull down                          |
| acpP | aidB  | pull down                          |
| acpP | hupB  | pull down                          |
| acpP | lpdA  | pull down                          |
| acpP | lpdA  | pull down                          |
| acpP | espP  | affinity chromatography technology |
| acpP | fabB  | tandem affinity purification       |
| acpP | fabB  | pull down                          |
| acpP | fabF  | pull down                          |
| acpP | fabF  | tandem affinity purification       |
| acpP | fabF  | pull down                          |
| acpP | fabG  | pull down                          |
| acpP | fabG  | pull down                          |
| acpP | fabH  | pull down                          |
| acpP | fabZ  | pull down                          |
| acpP | glmU  | pull down                          |
| acpP | glmU  | pull down                          |
| acpP | insO2 | pull down                          |

|      |      |                                    |
|------|------|------------------------------------|
| acpP | iscS | tandem affinity purification       |
| acpP | lpxD | pull down                          |
| acpP | lpxD | pull down                          |
| acpP | malT | pull down                          |
| acpP | mukB | tandem affinity purification       |
| acpP | mukB | pull down                          |
| acpP | aceE | pull down                          |
| acpP | aceF | pull down                          |
| acpP | plsB | adenylate cyclase complementation  |
| acpP | plsB | pull down                          |
| acpP | purB | blue native page                   |
| acpP | ribF | pull down                          |
| acpP | rplO | pull down                          |
| acpP | rplV | pull down                          |
| acpP | rpmB | pull down                          |
| acpP | rpsM | pull down                          |
| acpP | rpsF | pull down                          |
| acpP | rpsG | pull down                          |
| acpP | rpsG | pull down                          |
| acpP | rpsH | pull down                          |
| acpP | secA | blue native page                   |
| acpP | secA | tandem affinity purification       |
| acpP | secA | pull down                          |
| acpP | spoT | tandem affinity purification       |
| acpP | spoT | pull down                          |
| acpP | ybgC | pull down                          |
| acpP | ybgC | affinity chromatography technology |
| acpP | ybgC | affinity chromatography technology |
| acpP | ybgC | tandem affinity purification       |
| acpP | ybgC | pull down                          |
| acpP | ybgJ | pull down                          |
| acpP | yhbY | pull down                          |
| acpP | yiiD | pull down                          |
| acpP | yiiD | pull down                          |

|      |      |           |
|------|------|-----------|
| acrR | glpD | pull down |
|------|------|-----------|

|     |       |           |
|-----|-------|-----------|
| add | arpA  | pull down |
| add | gcd   | pull down |
| add | ligA  | pull down |
| add | insC7 | pull down |
| add | rplT  | pull down |
| add | rpsM  | pull down |

|      |      |                                                   |
|------|------|---------------------------------------------------|
| adhE | lacZ | pull down                                         |
| adhE | intR | pull down                                         |
| adhE | nadE | pull down                                         |
| adhE | rplB | pull down                                         |
| adhE | rpmB | pull down                                         |
| adhE | rpsB | pull down                                         |
| adhE | rsuA | pull down                                         |
| agp  | hfq  | pull down                                         |
| agp  | mutT | pull down                                         |
| agp  | yghW | pull down                                         |
| ahpC | lacZ | pull down                                         |
| ahpC | recB | pull down                                         |
| ahpC | gpmI | comigration in non denaturing gel electrophoresis |
| ahpC | pgk  | comigration in non denaturing gel electrophoresis |
| ahpC | rhcC | pull down                                         |
| ahpC | rhcE | pull down                                         |
| ahpC | rtcB | pull down                                         |
| ahpF | -    | pull down                                         |
| ahpF | quuQ | pull down                                         |
| ahpF | yfeS | pull down                                         |
| aidB | groL | pull down                                         |
| aidB | groL | pull down                                         |
| aidB | dnaK | pull down                                         |
| aidB | dnaK | pull down                                         |
| aidB | hldD | pull down                                         |
| aidB | aceF | pull down                                         |
| aidB | aceF | pull down                                         |
| aidB | rplA | pull down                                         |
| aidB | rplM | pull down                                         |
| aidB | rplS | pull down                                         |
| aidB | rplU | pull down                                         |
| aidB | rplV | pull down                                         |
| aidB | rpmB | pull down                                         |
| aidB | rplC | pull down                                         |
| aidB | rplC | pull down                                         |
| aidB | rpsL | pull down                                         |
| aidB | rpsN | pull down                                         |
| aidB | rpsS | pull down                                         |

|      |      |           |
|------|------|-----------|
| aidB | rpsB | pull down |
| aidB | rpsT | pull down |
| aidB | rpsD | pull down |
| aidB | rpsE | pull down |
| aidB | rpsF | pull down |
| aidB | rpsG | pull down |
| aidB | yhbY | pull down |
| aidB | yjgD | pull down |

|      |      |           |
|------|------|-----------|
| thrA | ahpF | pull down |
| thrA | glpD | pull down |

|      |      |           |
|------|------|-----------|
| fbaA | dnaK | pull down |
| fbaA | dnaK | pull down |
| fbaA | fldA | pull down |
| fbaA | rpsB | pull down |
| fbaA | hsdR | pull down |
| fbaA | yfeR | pull down |

|      |      |           |
|------|------|-----------|
| fbaB | dnaJ | pull down |
| fbaB | dnaK | pull down |
| fbaB | ybbN | pull down |
| fbaB | ybbN | pull down |

|     |      |           |
|-----|------|-----------|
| eda | lacZ | pull down |
| eda | btuD | pull down |
| eda | groL | pull down |
| eda | otsB | pull down |
| eda | rhsA | pull down |
| eda | rplB | pull down |
| eda | ycgE | pull down |

|      |      |           |
|------|------|-----------|
| allC | kbaZ | pull down |
| allC | nadE | pull down |
| allC | rpsT | pull down |
| allC | talB | pull down |
| allC | uvrY | pull down |

|      |      |           |
|------|------|-----------|
| allR | hupA | pull down |
| allR | sdhA | pull down |
| allR | glpK | pull down |
| allR | rplA | pull down |
| allR | rplR | pull down |

|      |      |           |
|------|------|-----------|
| allR | rplS | pull down |
| allR | rplB | pull down |
| allR | rplU | pull down |
| allR | rplX | pull down |
| allR | rmuC | pull down |
| allR | rpsL | pull down |
| allR | rpsM | pull down |
| allR | rpsN | pull down |
| allR | rpsO | pull down |
| allR | rpsE | pull down |
| allR | rpsF | pull down |
| allR | rpsG | pull down |
| allR | tatE | pull down |

|      |      |           |
|------|------|-----------|
| amiA | nadE | pull down |
| amiA | rplD | pull down |

|     |      |           |
|-----|------|-----------|
| amn | groL | pull down |
| amn | hrpB | pull down |
| amn | livJ | pull down |
| amn | lsrA | pull down |
| amn | priA | pull down |
| amn | secA | pull down |

|      |      |           |
|------|------|-----------|
| pepA | lacZ | pull down |
| pepA | sucB | pull down |
| pepA | pyrB | pull down |

|     |      |           |
|-----|------|-----------|
| map | deaD | pull down |
| map | gshB | pull down |
| map | maa  | pull down |
| map | mdtB | pull down |
| map | recE | pull down |
| map | rplM | pull down |
| map | rplS | pull down |
| map | rplV | pull down |
| map | rplW | pull down |
| map | rpmB | pull down |
| map | rpmG | pull down |

|     |      |           |
|-----|------|-----------|
| map | rplD | pull down |
| map | rplL | pull down |
| map | rplI | pull down |
| map | rpsJ | pull down |
| map | rpsP | pull down |
| map | rpsB | pull down |
| map | rpsT | pull down |
| map | rpsE | pull down |
| map | uidR | pull down |
| map | yeaP | pull down |
| map | yhbY | pull down |

|      |      |           |
|------|------|-----------|
| pepN | groL | pull down |
| pepN | hyfG | pull down |
| pepN | rsuA | pull down |
| pepN | ygjK | pull down |

|     |      |           |
|-----|------|-----------|
| apt | dxr  | pull down |
| apt | gatZ | pull down |
| apt | motB | pull down |

|      |     |           |
|------|-----|-----------|
| arcA | prs | pull down |
|------|-----|-----------|

|      |      |           |
|------|------|-----------|
| aroB | groL | pull down |
| aroB | fdnH | pull down |
| aroB | yjhR | pull down |

|      |      |           |
|------|------|-----------|
| aroE | nadE | pull down |
| aroE | yedE | pull down |
| aroE | yhfS | pull down |

|      |      |           |
|------|------|-----------|
| aroM | rplN | pull down |
| aroM | rpmB | pull down |
| aroM | yail | pull down |



|      |       |                                                   |
|------|-------|---------------------------------------------------|
| asnA | serC  | pull down                                         |
| asnC | hchA  | pull down                                         |
| ansB | insl1 | pull down                                         |
| ansB | visC  | pull down                                         |
| atpA | atpD  | blue native page                                  |
| atpA | atpD  | pull down                                         |
| atpA | atpD  | comigration in non denaturing gel electrophoresis |
| atpA | atpD  | comigration in non denaturing gel electrophoresis |
| atpA | atpD  | blue native page                                  |
| atpA | atpF  | blue native page                                  |
| atpA | atpG  | blue native page                                  |
| atpA | atpG  | blue native page                                  |
| atpA | atpE  | blue native page                                  |
| atpA | dadA  | comigration in non denaturing gel electrophoresis |
| atpA | dadA  | comigration in non denaturing gel electrophoresis |
| atpA | glmU  | pull down                                         |
| atpA | pepB  | pull down                                         |
| atpA | pyrD  | comigration in non denaturing gel electrophoresis |
| atpA | pyrD  | comigration in non denaturing gel electrophoresis |
| atpA | rplA  | comigration in non denaturing gel electrophoresis |
| atpA | rplI  | comigration in non denaturing gel electrophoresis |
| atpA | rmlA1 | pull down                                         |
| atpD | atpA  | blue native page                                  |
| atpD | atpA  | pull down                                         |
| atpD | ftsZ  | pull down                                         |
| atpD | glpD  | pull down                                         |
| atpD | recA  | pull down                                         |
| atpD | rho   | pull down                                         |
| atpD | rplE  | pull down                                         |
| atpD | rplF  | pull down                                         |
| atpD | rpsB  | pull down                                         |
| atpG | atpA  | pull down                                         |
| atpG | atpA  | pull down                                         |
| atpG | atpD  | pull down                                         |
| atpG | atpC  | pull down                                         |
| atpG | atpC  | pull down                                         |

|      |       |           |
|------|-------|-----------|
| atpG | rplW  | pull down |
| zntA | clpB  | pull down |
| zntA | fecE  | pull down |
| zntA | gltB  | pull down |
| zntA | lon   | pull down |
| zntA | talB  | pull down |
| zntA | wecG  | pull down |
| zntA | yodA  | pull down |
| basR | prs   | pull down |
| basR | rsuA  | pull down |
| basR | srlR  | pull down |
| basR | ydgH  | pull down |
| bcp  | aroD  | pull down |
| bcp  | cysB  | pull down |
| bcp  | insL1 | pull down |
| bcp  | insL1 | pull down |
| bcp  | nadE  | pull down |
| bcp  | rsmC  | pull down |
| bcp  | ycbG  | pull down |
| betB | recB  | pull down |
| betB | hemG  | pull down |
| betB | phnN  | pull down |
| betB | rhsA  | pull down |
| betB | rimJ  | pull down |
| betB | rluB  | pull down |
| bfr  | mlc   | pull down |
| bfr  | murB  | pull down |
| bglA | dnaE  | pull down |
| bglA | nadE  | pull down |

|      |      |           |
|------|------|-----------|
| bioA | groL | pull down |
| bioA | dnaE | pull down |
| bioA | prs  | pull down |
| bioA | nuoG | pull down |

|      |      |           |
|------|------|-----------|
| bioB | dnaK | pull down |
| bioB | nadE | pull down |

|      |      |           |
|------|------|-----------|
| bioH | groL | pull down |
| bioH | zwf  | pull down |
| bioH | sucB | pull down |

|      |      |           |
|------|------|-----------|
| btuE | groL | pull down |
| btuE | dnaJ | pull down |
| btuE | dnaT | pull down |
| btuE | ftsI | pull down |
| btuE | lolE | pull down |
| btuE | nadE | pull down |
| btuE | rplB | pull down |
| btuE | rplE | pull down |
| btuE | rpsB | pull down |
| btuE | rpsC | pull down |
| btuE | rpsE | pull down |
| btuE | yciE | pull down |
| btuE | yddH | pull down |
| btuE | ygfH | pull down |
| btuE | yobD | pull down |

|      |      |           |
|------|------|-----------|
| caiB | sdhA | pull down |
| caiB | dld  | pull down |
| caiB | rhsA | pull down |
| caiB | rhsD | pull down |

|      |      |           |
|------|------|-----------|
| katE | groL | pull down |
| katE | recB | pull down |
| katE | fur  | pull down |
| katE | glnD | pull down |
| katE | lhr  | pull down |
| katE | manC | pull down |
| katE | rlmL | pull down |

|      |      |           |
|------|------|-----------|
| katE | yneG | pull down |
| cbpA | aidB | pull down |
| cbpA | groL | pull down |
| cbpA | clpA | pull down |
| cbpA | clpB | pull down |
| cbpA | deaD | pull down |
| cbpA | dnaK | pull down |
| cbpA | dnaK | pull down |
| cbpA | dnaK | pull down |
| cbpA | tufA | pull down |
| cbpA | fabZ | pull down |
| cbpA | hscA | pull down |
| cbpA | infC | pull down |
| cbpA | lon  | pull down |
| cbpA | metK | pull down |
| cbpA | mukB | pull down |
| cbpA | nadE | pull down |
| cbpA | prsA | pull down |
| cbpA | rbsK | pull down |
| cbpA | rho  | pull down |
| cbpA | rplA | pull down |
| cbpA | rplS | pull down |
| cbpA | rplB | pull down |
| cbpA | rplB | pull down |
| cbpA | rplV | pull down |
| cbpA | rplX | pull down |
| cbpA | rpmC | pull down |
| cbpA | rplC | pull down |
| cbpA | rpmG | pull down |
| cbpA | rplD | pull down |
| cbpA | rplD | pull down |
| cbpA | rplE | pull down |
| cbpA | rplF | pull down |
| cbpA | rplL | pull down |
| cbpA | rplI | pull down |
| cbpA | rpoC | pull down |
| cbpA | rpsA | pull down |
| cbpA | rpsM | pull down |
| cbpA | rpsP | pull down |
| cbpA | rpsB | pull down |
| cbpA | rpsB | pull down |
| cbpA | rpsC | pull down |
| cbpA | rpsD | pull down |
| cbpA | rpsE | pull down |

|      |      |           |
|------|------|-----------|
| cbpA | rpsG | pull down |
| cbpA | rpsG | pull down |
| cbpA | srnB | pull down |
| cbpA | tusC | pull down |
| cbpA | ugpB | pull down |
| cbpA | yfbT | pull down |
| cbpA | ygiF | pull down |
| cbpA | yjeJ | pull down |
| cbpA | yjfK | pull down |

|     |      |           |
|-----|------|-----------|
| cdh | fdhE | pull down |
| cdh | ndh  | pull down |

|     |     |                       |
|-----|-----|-----------------------|
| cda | cdi | x-ray crystallography |
|-----|-----|-----------------------|

|     |      |           |
|-----|------|-----------|
| cfa | hrpB | pull down |
|-----|------|-----------|

|      |      |                                       |
|------|------|---------------------------------------|
| groS | dnaK | pull down                             |
| groS | dnaK | pull down                             |
| groS | fusA | pull down                             |
| groS | fepB | pull down                             |
| groS | glpE | cosedimentation in solution           |
| groS | hldD | pull down                             |
| groS | hldD | pull down                             |
| groS | htpG | pull down                             |
| groS | malE | fluorescent resonance energy transfer |
| groS | malE | fluorescent resonance energy transfer |
| groS | minD | pull down                             |
| groS | mreB | pull down                             |
| groS | nadE | pull down                             |
| groS | nrpI | pull down                             |
| groS | slyD | pull down                             |
| groS | sufE | pull down                             |
| groS | tig  | pull down                             |

|      |      |                                                   |
|------|------|---------------------------------------------------|
| groS | tig  | pull down                                         |
| groS | ybbP | pull down                                         |
| groL | clpB | pull down                                         |
| groL | dnaK | pull down                                         |
| groL | gatY | cosedimentation through density gradient          |
| groL | glpE | cosedimentation in solution                       |
| groL | grpE | pull down                                         |
| groL | lon  | pull down                                         |
| groL | malE | fluorescence polarization spectroscopy            |
| groL | malE | fluorescence correlation spectroscopy             |
| groL | malE | fluorescent resonance energy transfer             |
| groL | mdh  | molecular sieving                                 |
| groL | narG | pull down                                         |
| groL | nuoG | pull down                                         |
| groL | pyrD | pull down                                         |
| groL | rhsA | pull down                                         |
| groL | rpoC | comigration in non denaturing gel electrophoresis |
| groL | rssA | pull down                                         |
| groL | tig  | comigration in non denaturing gel electrophoresis |
| groL | uspG | cosedimentation through density gradient          |
| groL | ybbN | pull down                                         |
| groL | ycgR | pull down                                         |
| groL | yhdJ | pull down                                         |
| groL | yibA | pull down                                         |
| groL | yjeS | pull down                                         |
| gltA | groL | pull down                                         |
| gltA | pykF | comigration in non denaturing gel electrophoresis |
| gltA | matC | pull down                                         |
| gltA | nadE | pull down                                         |
| citC | groL | pull down                                         |
| citC | citX | pull down                                         |
| citC | dinG | pull down                                         |
| citC | lon  | pull down                                         |
| citC | rhcC | pull down                                         |
| clpA | barA | pull down                                         |
| clpA | cheY | pull down                                         |
| clpA | clpS | pull down                                         |
| clpA | clpS | x-ray crystallography                             |
| clpA | clpS | x-ray crystallography                             |

|      |      |                       |
|------|------|-----------------------|
| clpA | clpS | x-ray crystallography |
| clpA | clpS | x-ray crystallography |
| clpA | dnaK | pull down             |
| clpA | tufA | pull down             |
| clpA | fdnH | pull down             |
| clpA | fhuA | pull down             |
| clpA | cadA | pull down             |
| clpA | mukB | pull down             |
| clpA | nadE | pull down             |
| clpA | ppk  | pull down             |
| clpA | proV | pull down             |
| clpA | purL | pull down             |
| clpA | rho  | pull down             |
| clpA | rho  | pull down             |
| clpA | rhcC | pull down             |
| clpA | rplJ | pull down             |
| clpA | rplM | pull down             |
| clpA | rplQ | pull down             |
| clpA | rplR | pull down             |
| clpA | rplB | pull down             |
| clpA | rplU | pull down             |
| clpA | rpmA | pull down             |
| clpA | rpmC | pull down             |
| clpA | rplC | pull down             |
| clpA | rpmG | pull down             |
| clpA | rplD | pull down             |
| clpA | rplE | pull down             |
| clpA | rplL | pull down             |
| clpA | rplI | pull down             |
| clpA | rpoB | pull down             |
| clpA | rpoC | pull down             |
| clpA | rpsA | pull down             |
| clpA | rpsA | pull down             |
| clpA | rpsJ | pull down             |
| clpA | rpsN | pull down             |
| clpA | rpsP | pull down             |
| clpA | rpsB | pull down             |
| clpA | rpsB | pull down             |
| clpA | rpsU | pull down             |
| clpA | rpsD | pull down             |
| clpA | rpsF | pull down             |
| clpA | rpsG | pull down             |
| clpA | rpsG | pull down             |
| clpA | sbcC | pull down             |
| clpA | secA | pull down             |



|      |      |                  |
|------|------|------------------|
| clpA | spoT | pull down        |
| clpA | ybaA | pull down        |
| clpA | ybjE | pull down        |
| clpA | yciH | pull down        |
| clpA | ygiF | pull down        |
| clpA | yhbY | pull down        |
| clpB | lacZ | pull down        |
| clpB | ccmB | pull down        |
| clpB | sdhA | pull down        |
| clpB | dnaK | blue native page |
| clpB | tufA | pull down        |
| clpB | evgS | pull down        |
| clpB | gfcB | pull down        |
| clpB | infB | blue native page |
| clpB | lasT | pull down        |
| clpB | glcB | pull down        |
| clpB | nadE | pull down        |
| clpB | phoB | pull down        |
| clpB | ptsP | pull down        |
| clpB | ptsN | pull down        |
| clpB | putA | pull down        |
| clpB | rplM | pull down        |
| clpB | rplB | pull down        |
| clpB | rplU | pull down        |
| clpB | rplV | pull down        |
| clpB | rpmC | pull down        |
| clpB | rplC | pull down        |
| clpB | rnz  | pull down        |
| clpB | rpsA | blue native page |
| clpB | rpsJ | pull down        |
| clpB | rpsN | pull down        |
| clpB | rpsB | pull down        |
| clpB | rpsG | pull down        |
| clpB | rpsH | pull down        |
| clpB | sapC | pull down        |
| clpB | alaS | pull down        |
| clpB | thiG | pull down        |
| clpB | uidC | pull down        |
| clpB | ulaF | pull down        |
| clpB | yagW | pull down        |
| clpB | ydeP | pull down        |
| clpB | ygaU | pull down        |
| clpB | yhfT | pull down        |
| clpB | yjbH | pull down        |

|      |      |           |
|------|------|-----------|
| cmoA | napC | pull down |
| cmoA | ruvC | pull down |
| cmoA | ycbR | pull down |

|     |      |           |
|-----|------|-----------|
| crp | rplC | pull down |
| crp | rplL | pull down |
| crp | rpsJ | pull down |
| crp | rpsE | pull down |

|      |      |                  |
|------|------|------------------|
| cspC | accA | pull down        |
| cspC | accA | pull down        |
| cspC | accD | pull down        |
| cspC | aidB | pull down        |
| cspC | aidB | pull down        |
| cspC | cpxR | pull down        |
| cspC | creC | pull down        |
| cspC | cspD | pull down        |
| cspC | cspE | pull down        |
| cspC | hupA | blue native page |
| cspC | hupA | pull down        |
| cspC | hupB | pull down        |
| cspC | deaD | pull down        |
| cspC | deaD | pull down        |
| cspC | dnaJ | pull down        |
| cspC | dtpB | pull down        |
| cspC | entB | pull down        |
| cspC | eptA | pull down        |
| cspC | glpK | pull down        |
| cspC | gmr  | pull down        |
| cspC | hfq  | pull down        |
| cspC | hns  | blue native page |
| cspC | hrpA | pull down        |
| cspC | metR | pull down        |
| cspC | nadE | pull down        |
| cspC | pnp  | pull down        |
| cspC | prpD | pull down        |
| cspC | putA | pull down        |
| cspC | rcsB | pull down        |

|      |      |           |
|------|------|-----------|
| cspC | recN | pull down |
| cspC | rfaj | pull down |
| cspC | rhIE | pull down |
| cspC | rho  | pull down |
| cspC | rho  | pull down |
| cspC | rplA | pull down |
| cspC | rplA | pull down |
| cspC | rplA | pull down |
| cspC | rplM | pull down |
| cspC | rplM | pull down |
| cspC | rplR | pull down |
| cspC | rplS | pull down |
| cspC | rplB | pull down |
| cspC | rplB | pull down |
| cspC | rplB | pull down |
| cspC | rplU | pull down |
| cspC | rplV | pull down |
| cspC | rplW | pull down |
| cspC | rplX | pull down |
| cspC | rplC | pull down |
| cspC | rplC | pull down |
| cspC | rplD | pull down |
| cspC | rplD | pull down |
| cspC | rplE | pull down |
| cspC | rplE | pull down |
| cspC | rplI | pull down |
| cspC | rlmL | pull down |
| cspC | rluB | pull down |
| cspC | rluC | pull down |
| cspC | rluE | pull down |
| cspC | rnR  | pull down |
| cspC | rpsA | pull down |
| cspC | rpsA | pull down |
| cspC | rpsJ | pull down |
| cspC | rpsM | pull down |
| cspC | rpsM | pull down |
| cspC | rpsN | pull down |
| cspC | rpsB | pull down |
| cspC | rpsB | pull down |
| cspC | rpsT | pull down |
| cspC | rpsC | pull down |
| cspC | rpsC | pull down |
| cspC | rpsD | pull down |
| cspC | rpsD | pull down |
| cspC | rpsD | pull down |

|      |      |           |
|------|------|-----------|
| cspC | rpsE | pull down |
| cspC | rpsE | pull down |
| cspC | rpsF | pull down |
| cspC | rpsG | pull down |
| cspC | rpsG | pull down |
| cspC | rpsG | pull down |
| cspC | rpsI | pull down |
| cspC | rsmB | pull down |
| cspC | topA | pull down |
| cspC | uspG | pull down |
| cspC | ycgE | pull down |
| cspC | ydaY | pull down |
| cspC | yeeJ | pull down |
| cspC | yfiF | pull down |
| cspC | yhbY | pull down |
| cspC | yhiR | pull down |
| cspC | yhiR | pull down |

|      |      |           |
|------|------|-----------|
| cspD | accA | pull down |
| cspD | acrD | pull down |
| cspD | aspA | pull down |
| cspD | cspC | pull down |
| cspD | cspC | pull down |
| cspD | cspE | pull down |
| cspD | hupA | pull down |
| cspD | ddlA | pull down |
| cspD | ddpB | pull down |
| cspD | deaD | pull down |
| cspD | dppD | pull down |
| cspD | aceE | pull down |
| cspD | pnp  | pull down |
| cspD | rho  | pull down |
| cspD | rplA | pull down |
| cspD | rplM | pull down |
| cspD | rplS | pull down |
| cspD | rplB | pull down |
| cspD | rplX | pull down |
| cspD | rplC | pull down |
| cspD | rplC | pull down |
| cspD | rlmL | pull down |
| cspD | rluB | pull down |
| cspD | rluC | pull down |
| cspD | rnr  | pull down |
| cspD | rpsA | pull down |
| cspD | rpsJ | pull down |

|      |      |           |
|------|------|-----------|
| cspD | rpsM | pull down |
| cspD | rpsN | pull down |
| cspD | rpsB | pull down |
| cspD | rpsB | pull down |
| cspD | rpsT | pull down |
| cspD | rpsU | pull down |
| cspD | rpsC | pull down |
| cspD | rpsD | pull down |
| cspD | rpsD | pull down |
| cspD | rpsE | pull down |
| cspD | rpsE | pull down |
| cspD | rpsG | pull down |
| cspD | rpsG | pull down |
| cspD | skp  | pull down |
| cspD | tehB | pull down |
| cspD | ydiA | pull down |
| cspD | yfiF | pull down |

|      |      |                  |
|------|------|------------------|
| cydA | cydB | blue native page |
| cydA | yhcB | blue native page |

|      |      |           |
|------|------|-----------|
| cynS | dnaK | pull down |
| cynS | gshB | pull down |
| cynS | prs  | pull down |

|      |      |           |
|------|------|-----------|
| cysB | gcvP | pull down |
| cysB | nuoG | pull down |
| cysB | thrS | pull down |
| cysB | yhil | pull down |

|      |      |           |
|------|------|-----------|
| cysG | nadE | pull down |
|------|------|-----------|

|      |      |           |
|------|------|-----------|
| cysH | groL | pull down |
|------|------|-----------|

|      |      |           |
|------|------|-----------|
| cysJ | ribB | pull down |
|------|------|-----------|

|      |      |                                                   |
|------|------|---------------------------------------------------|
| cysK | dld  | pull down                                         |
| cysK | matC | pull down                                         |
| cysK | nadE | pull down                                         |
| cysK | phnN | pull down                                         |
| cysK | rplD | pull down                                         |
| cysK | sodB | comigration in non denaturing gel electrophoresis |
| cysK | glx  | comigration in non denaturing gel electrophoresis |

|      |      |                  |
|------|------|------------------|
| cysK | glnS | pull down        |
| cysP | dnaK | pull down        |
| dapA | nadE | pull down        |
| dapA | ycbB | pull down        |
| dapD | speB | blue native page |
| dapE | groL | pull down        |
| hupA | cheA | pull down        |
| hupA | hupB | pull down        |
| hupA | dnaK | pull down        |
| hupA | dnaK | pull down        |
| hupA | malQ | pull down        |
| hupA | nrdI | pull down        |
| hupA | ompL | pull down        |
| hupA | phnN | pull down        |
| hupA | malP | pull down        |
| hupA | rplO | pull down        |
| hupA | rplB | pull down        |
| hupA | rplD | pull down        |
| hupA | rluB | pull down        |
| hupA | rpoA | pull down        |
| hupA | rpsD | pull down        |
| hupA | ycgE | pull down        |
| hupA | yciH | pull down        |
| hupB | hupA | pull down        |
| hupB | sdhA | pull down        |
| hupB | dnaK | pull down        |
| hupB | polA | pull down        |

|      |      |           |
|------|------|-----------|
| hupB | polA | pull down |
| hupB | dnaE | pull down |
| hupB | fis  | pull down |
| hupB | greA | pull down |
| hupB | hns  | pull down |
| hupB | htpG | pull down |
| hupB | ihfA | pull down |
| hupB | ihfB | pull down |
| hupB | malQ | pull down |
| hupB | malQ | pull down |
| hupB | nadE | pull down |
| hupB | nfnB | pull down |
| hupB | nuoE | pull down |
| hupB | pepD | pull down |
| hupB | malP | pull down |
| hupB | malP | pull down |
| hupB | rdgC | pull down |
| hupB | rhIE | pull down |
| hupB | rplA | pull down |
| hupB | rplQ | pull down |
| hupB | rplS | pull down |
| hupB | rplB | pull down |
| hupB | rplU | pull down |
| hupB | rplC | pull down |
| hupB | rplC | pull down |
| hupB | rplI | pull down |
| hupB | rpoA | pull down |
| hupB | rpsM | pull down |
| hupB | rpsD | pull down |
| hupB | rpsG | pull down |
| hupB | rpsG | pull down |
| hupB | rpsI | pull down |
| hupB | seqA | pull down |
| hupB | skp  | pull down |
| hupB | slyD | pull down |
| hupB | hsdM | pull down |
| hupB | uspG | pull down |
| hupB | vsr  | pull down |
| hupB | ydcP | pull down |
| hupB | yebG | pull down |
| hupB | yghW | pull down |
| gadA | groL | pull down |
| gadA | gadB | pull down |
| gadA | gadB | pull down |



|      |      |                                                   |
|------|------|---------------------------------------------------|
| gadA | gadB | pull down                                         |
| gadA | dnaK | pull down                                         |
| gadA | dnaK | pull down                                         |
| gadA | dnaK | pull down                                         |
| gadA | glpD | comigration in non denaturing gel electrophoresis |
| gadA | glpD | comigration in non denaturing gel electrophoresis |
| gadA | metQ | comigration in non denaturing gel electrophoresis |
| gadA | metQ | comigration in non denaturing gel electrophoresis |
| gadA | slp  | comigration in non denaturing gel electrophoresis |
| gadA | ssb  | pull down                                         |
| gadA | torA | pull down                                         |
| gadA | ybjP | comigration in non denaturing gel electrophoresis |

|      |      |           |
|------|------|-----------|
| gadB | groL | pull down |
| gadB | gadA | pull down |
| gadB | gadA | pull down |
| gadB | dnaK | pull down |
| gadB | yadG | pull down |

|     |      |           |
|-----|------|-----------|
| dcm | amn  | pull down |
| dcm | groL | pull down |
| dcm | mukB | pull down |
| dcm | aceF | pull down |
| dcm | purR | pull down |
| dcm | rimK | pull down |
| dcm | rplA | pull down |
| dcm | rplM | pull down |
| dcm | rplB | pull down |
| dcm | rplU | pull down |
| dcm | rplV | pull down |
| dcm | rplC | pull down |
| dcm | rpsN | pull down |
| dcm | rpsT | pull down |
| dcm | rpsC | pull down |
| dcm | rpsE | pull down |
| dcm | rpsG | pull down |
| dcm | yedV | pull down |

|     |      |           |
|-----|------|-----------|
| dcp | atpG | pull down |
| dcp | pgm  | pull down |
| dcp | rplB | pull down |

|      |      |           |
|------|------|-----------|
| dcuS | sdhA | pull down |
|------|------|-----------|

|      |      |           |
|------|------|-----------|
| ddlA | alsK | pull down |
| ddlA | apt  | pull down |
| ddlA | bglX | pull down |
| ddlA | speF | pull down |
| ddlA | ddpA | pull down |
| ddlA | dnaK | pull down |
| ddlA | ftsI | pull down |
| ddlA | helD | pull down |
| ddlA | nadE | pull down |
| ddlA | proA | pull down |
| ddlA | viaA | pull down |
| ddlA | yafC | pull down |

|      |      |           |
|------|------|-----------|
| deaD | accA | pull down |
| deaD | acpP | pull down |
| deaD | bglA | pull down |
| deaD | cspC | pull down |
| deaD | dacA | pull down |
| deaD | hupA | pull down |
| deaD | hupB | pull down |
| deaD | dnaJ | pull down |
| deaD | dppC | pull down |
| deaD | evgA | pull down |
| deaD | hcp  | pull down |
| deaD | hrpA | pull down |
| deaD | gsk  | pull down |
| deaD | aceE | pull down |
| deaD | aceE | pull down |
| deaD | rplA | pull down |
| deaD | rplA | pull down |
| deaD | rplK | pull down |
| deaD | rplM | pull down |
| deaD | rplM | pull down |
| deaD | rplP | pull down |
| deaD | rplQ | pull down |
| deaD | rplR | pull down |
| deaD | rplS | pull down |
| deaD | rplB | pull down |
| deaD | rplB | pull down |
| deaD | rplU | pull down |
| deaD | rplV | pull down |
| deaD | rplV | pull down |
| deaD | rplW | pull down |
| deaD | rplX | pull down |

|      |      |           |
|------|------|-----------|
| deaD | rpmA | pull down |
| deaD | rpmB | pull down |
| deaD | rplC | pull down |
| deaD | rplD | pull down |
| deaD | rplF | pull down |
| deaD | rplI | pull down |
| deaD | rplI | pull down |
| deaD | rlmL | pull down |
| deaD | rluB | pull down |
| deaD | rluB | pull down |
| deaD | rnR  | pull down |
| deaD | rnR  | pull down |
| deaD | rpsA | pull down |
| deaD | rpsA | pull down |
| deaD | rpsJ | pull down |
| deaD | rpsK | pull down |
| deaD | rpsM | pull down |
| deaD | rpsM | pull down |
| deaD | rpsN | pull down |
| deaD | rpsO | pull down |
| deaD | rpsP | pull down |
| deaD | rpsR | pull down |
| deaD | rpsS | pull down |
| deaD | rpsB | pull down |
| deaD | rpsB | pull down |
| deaD | rpsT | pull down |
| deaD | rpsU | pull down |
| deaD | rpsU | pull down |
| deaD | rpsC | pull down |
| deaD | rpsC | pull down |
| deaD | rpsD | pull down |
| deaD | rpsD | pull down |
| deaD | rpsE | pull down |
| deaD | rpsE | pull down |
| deaD | rpsF | pull down |
| deaD | rpsG | pull down |
| deaD | rpsG | pull down |
| deaD | rpsH | pull down |
| deaD | rpsI | pull down |
| deaD | sixA | pull down |
| deaD | srmB | pull down |
| deaD | sucD | pull down |
| deaD | sufC | pull down |
| deaD | uraA | pull down |
| deaD | yfiF | pull down |

|      |      |           |
|------|------|-----------|
| deaD | yfiF | pull down |
| deaD | ygiF | pull down |
| deaD | yhiR | pull down |
| deaD | yihQ | pull down |

|     |      |           |
|-----|------|-----------|
| def | rplD | pull down |
| def | usg  | pull down |
| def | yaeB | pull down |

|      |      |           |
|------|------|-----------|
| degP | dnaK | pull down |
|------|------|-----------|

|      |      |           |
|------|------|-----------|
| deoB | intE | pull down |
| deoB | rplS | pull down |
| deoB | rseB | pull down |
| deoB | ylil | pull down |

|      |      |           |
|------|------|-----------|
| deoC | nadE | pull down |
| deoC | pepD | pull down |
| deoC | gltX | pull down |

|      |      |           |
|------|------|-----------|
| deoD | pyrH | pull down |
|------|------|-----------|

|      |      |           |
|------|------|-----------|
| dhaK | guaC | pull down |
| dhaK | yhiH | pull down |

|     |      |           |
|-----|------|-----------|
| asd | dnaK | pull down |
|-----|------|-----------|

|     |      |           |
|-----|------|-----------|
| ndh | alr  | pull down |
| ndh | hldD | pull down |
| ndh | ompL | pull down |
| ndh | rplB | pull down |
| ndh | rpsC | pull down |
| ndh | rpsI | pull down |

|      |      |                       |
|------|------|-----------------------|
| sdhA | sdhB | x-ray crystallography |
| sdhA | sdhB | x-ray crystallography |
| sdhA | sdhB | blue native page      |
| sdhA | sdhC | x-ray crystallography |
| sdhA | sdhC | x-ray crystallography |

|      |      |                       |
|------|------|-----------------------|
| sdhA | sdhD | x-ray crystallography |
| sdhA | sdhD | x-ray crystallography |
| sdhA | nadE | pull down             |
| dicA | dnaK | pull down             |
| dicA | relE | pull down             |
| dicA | rpsT | pull down             |
| dicA | rpsD | pull down             |
| dicA | yjbJ | pull down             |
| dkSA | glpK | pull down             |
| dkSA | greA | blue native page      |
| dkSA | bcsZ | pull down             |
| dkSA | pepD | pull down             |
| dkSA | uspG | pull down             |
| dkSA | yedD | pull down             |
| dkSA | ykgF | pull down             |
| dkSA | yneG | pull down             |
| lpdA | iscS | pull down             |
| lpdA | aceE | pull down             |
| lpdA | aceF | blue native page      |
| lpdA | ribB | pull down             |
| dam  | groL | pull down             |
| dam  | lpdA | pull down             |
| dam  | lpdA | pull down             |
| dam  | envY | pull down             |
| dam  | glpD | pull down             |
| dam  | htpG | pull down             |
| dam  | narZ | pull down             |
| dam  | aceE | pull down             |
| dam  | rplA | pull down             |
| dam  | rplQ | pull down             |
| dam  | rplS | pull down             |
| dam  | rplV | pull down             |
| dam  | rplD | pull down             |
| dam  | rpoB | pull down             |
| dam  | rpoC | pull down             |
| dam  | rpsM | pull down             |
| dam  | rpsC | pull down             |
| dam  | rpsD | pull down             |
| dam  | rpsG | pull down             |

|     |      |           |
|-----|------|-----------|
| dam | serS | pull down |
| dam | ulaF | pull down |
| dam | ybaB | pull down |
| dam | yjbD | pull down |
| dam | yjji | pull down |

|      |      |                                     |
|------|------|-------------------------------------|
| dnaJ | add  | pull down                           |
| dnaJ | atpD | pull down                           |
| dnaJ | clpA | pull down                           |
| dnaJ | deaD | pull down                           |
| dnaJ | dnaK | pull down                           |
| dnaJ | dnaK | classical fluorescence spectroscopy |
| dnaJ | dnaK | surface plasmon resonance           |
| dnaJ | dnaK | surface plasmon resonance           |
| dnaJ | dnaK | surface plasmon resonance           |
| dnaJ | tufA | pull down                           |
| dnaJ | gatY | pull down                           |
| dnaJ | infB | pull down                           |
| dnaJ | lptD | pull down                           |
| dnaJ | malE | classical fluorescence spectroscopy |
| dnaJ | malT | pull down                           |
| dnaJ | metK | pull down                           |
| dnaJ | mnmG | pull down                           |
| dnaJ | mreB | pull down                           |
| dnaJ | mukB | pull down                           |
| dnaJ | narG | pull down                           |
| dnaJ | sucB | pull down                           |
| dnaJ | aceE | pull down                           |
| dnaJ | pdxB | pull down                           |
| dnaJ | pstB | pull down                           |
| dnaJ | recA | pull down                           |
| dnaJ | relE | pull down                           |
| dnaJ | rho  | pull down                           |
| dnaJ | rplA | pull down                           |
| dnaJ | rplJ | pull down                           |
| dnaJ | rplS | pull down                           |
| dnaJ | rplV | pull down                           |
| dnaJ | rplW | pull down                           |
| dnaJ | rplX | pull down                           |
| dnaJ | rpoC | pull down                           |
| dnaJ | rpsJ | pull down                           |
| dnaJ | rpsJ | pull down                           |
| dnaJ | rpsM | pull down                           |

|      |      |                                                   |
|------|------|---------------------------------------------------|
| dnaJ | rpsN | pull down                                         |
| dnaJ | rpsB | pull down                                         |
| dnaJ | rpsE | pull down                                         |
| dnaJ | rpsF | pull down                                         |
| dnaJ | srmB | pull down                                         |
| dnaJ | trxC | pull down                                         |
| dnaJ | yjbJ | pull down                                         |
|      |      |                                                   |
| dnaK | gadA | pull down                                         |
| dnaK | gadB | pull down                                         |
| dnaK | dcuD | pull down                                         |
| dnaK | tufA | pull down                                         |
| dnaK | tufA | pull down                                         |
| dnaK | entB | pull down                                         |
| dnaK | fabB | pull down                                         |
| dnaK | grpE | blue native page                                  |
| dnaK | grpE | pull down                                         |
| dnaK | grpE | pull down                                         |
| dnaK | gyrA | blue native page                                  |
| dnaK | hisC | pull down                                         |
| dnaK | hscA | pull down                                         |
| dnaK | htpG | pull down                                         |
| dnaK | aphA | pull down                                         |
| dnaK | lon  | pull down                                         |
| dnaK | narQ | pull down                                         |
| dnaK | pepB | pull down                                         |
| dnaK | rplJ | pull down                                         |
| dnaK | rplS | pull down                                         |
| dnaK | rpmG | pull down                                         |
| dnaK | rplD | pull down                                         |
| dnaK | rplF | pull down                                         |
| dnaK | rplI | pull down                                         |
| dnaK | rne  | anti tag coimmunoprecipitation                    |
| dnaK | rpsA | blue native page                                  |
| dnaK | rpsB | pull down                                         |
| dnaK | rpsB | pull down                                         |
| dnaK | sapA | pull down                                         |
| dnaK | alaS | pull down                                         |
| dnaK | aspS | comigration in non denaturing gel electrophoresis |
| dnaK | proS | pull down                                         |
| dnaK | tdcG | pull down                                         |
| dnaK | ydcR | pull down                                         |
| dnaK | ydfJ | pull down                                         |
| dnaK | yibA | pull down                                         |
| dnaK | yihM | pull down                                         |



|      |      |                       |
|------|------|-----------------------|
| dosP | kdsD | pull down             |
| dosP | talA | pull down             |
| dnaN | holA | x-ray crystallography |
| dnaN | holA | x-ray crystallography |
| dps  | deaD | pull down             |
| dps  | hfq  | pull down             |
| dps  | hldD | pull down             |
| dps  | hldD | pull down             |
| dps  | hrpA | pull down             |
| dps  | lon  | pull down             |
| dps  | ompG | pull down             |
| dps  | rplW | pull down             |
| dps  | rplX | pull down             |
| dps  | rpsJ | pull down             |
| dps  | rpsE | pull down             |
| dps  | rpsF | pull down             |
| dps  | rpsH | pull down             |
| dps  | skp  | pull down             |
| dps  | slyD | pull down             |
| dps  | tpx  | pull down             |
| dps  | yibL | pull down             |
| dxs  | adhE | pull down             |
| dxs  | appY | pull down             |
| dxs  | lacZ | pull down             |
| dxs  | clpA | pull down             |
| dxs  | cspA | pull down             |
| dxs  | tufA | pull down             |
| dxs  | fdnG | pull down             |
| dxs  | gltB | pull down             |
| dxs  | lon  | pull down             |
| dxs  | mreB | pull down             |
| dxs  | aceE | pull down             |
| dxs  | pstB | pull down             |
| dxs  | recA | pull down             |
| dxs  | rho  | pull down             |
| dxs  | tatE | pull down             |
| dxs  | yjgL | pull down             |
| dxs  | yqel | pull down             |

|      |       |                                                   |
|------|-------|---------------------------------------------------|
| eco  | eco   | x-ray crystallography                             |
| fusA | apt   | pull down                                         |
| fusA | aroB  | pull down                                         |
| fusA | citE  | pull down                                         |
| fusA | tsf   | blue native page                                  |
| fusA | tsf   | comigration in non denaturing gel electrophoresis |
| fusA | tufA  | blue native page                                  |
| fusA | tufA  | pull down                                         |
| fusA | tufA  | comigration in non denaturing gel electrophoresis |
| fusA | htrE  | pull down                                         |
| fusA | nadE  | pull down                                         |
| fusA | rbsA  | pull down                                         |
| fusA | rhsA  | pull down                                         |
| fusA | rmlA2 | pull down                                         |
| fusA | ybjD  | pull down                                         |
| fusA | ydiV  | pull down                                         |
| fusA | yeaG  | pull down                                         |
| fusA | yfcC  | pull down                                         |
| fusA | ypdI  | pull down                                         |

|     |      |                       |
|-----|------|-----------------------|
| tsf | asr  | pull down             |
| tsf | dnaC | pull down             |
| tsf | ecpD | pull down             |
| tsf | tufA | x-ray crystallography |
| tsf | tufA | blue native page      |
| tsf | tufA | pull down             |
| tsf | tufA | pull down             |
| tsf | rpsE | pull down             |
| tsf | hsdM | pull down             |

|      |      |           |
|------|------|-----------|
| tufA | acrF | pull down |
| tufA | dnaJ | pull down |
| tufA | dnaK | pull down |
| tufA | tsf  | pull down |
| tufA | fbpC | pull down |

|      |      |           |
|------|------|-----------|
| tufA | metK | pull down |
| tufA | mreB | pull down |
| tufA | secA | pull down |
| tufA | secA | pull down |
| tufA | valS | pull down |
| tufA | uspG | pull down |
| tufA | xylA | pull down |
| tufA | yaaA | pull down |
| tufA | ybeD | pull down |
| tufA | ydhQ | pull down |

|      |      |           |
|------|------|-----------|
| elaB | hfq  | pull down |
| elaB | rplB | pull down |
| elaB | rplT | pull down |
| elaB | rna  | pull down |
| elaB | rpsD | pull down |

|      |      |           |
|------|------|-----------|
| engD | asnA | pull down |
| engD | iscS | pull down |
| engD | ispG | pull down |
| engD | purR | pull down |
| engD | rtcB | pull down |
| engD | sohB | pull down |

|     |      |                                                   |
|-----|------|---------------------------------------------------|
| eno | aroF | pull down                                         |
| eno | dnaK | pull down                                         |
| eno | dnaK | pull down                                         |
| eno | fabZ | pull down                                         |
| eno | glpK | comigration in non denaturing gel electrophoresis |
| eno | nadE | pull down                                         |
| eno | nanE | pull down                                         |
| eno | pinR | pull down                                         |
| eno | pnp  | pull down                                         |
| eno | pnp  | pull down                                         |
| eno | racR | pull down                                         |
| eno | rdgC | pull down                                         |
| eno | rplW | pull down                                         |
| eno | rplI | pull down                                         |
| eno | rne  | pull down                                         |

|      |      |                                        |
|------|------|----------------------------------------|
| eno  | rne  | pull down                              |
| eno  | rne  | footprinting                           |
| eno  | rne  | mass spectrometry studies of complexes |
| eno  | rpsE | pull down                              |
| eno  | gltX | pull down                              |
| eno  | ybdN | pull down                              |
| eno  | yfeX | pull down                              |
| eno  | yniC | pull down                              |
| eno  | yqjK | pull down                              |
| envR | puuD | pull down                              |
| eutQ | deoC | pull down                              |
| eutQ | hyi  | pull down                              |
| eutQ | otsB | pull down                              |
| eutQ | rplD | pull down                              |
| eutQ | rlmH | pull down                              |
| eutQ | slyD | pull down                              |
| fabA | accA | pull down                              |
| fabA | lacZ | pull down                              |
| fabA | hupA | pull down                              |
| fabA | deaD | pull down                              |
| fabA | tufA | pull down                              |
| fabA | metK | pull down                              |
| fabA | sucB | pull down                              |
| fabA | rplA | pull down                              |
| fabA | rplS | pull down                              |
| fabA | rplB | pull down                              |
| fabA | rpoB | pull down                              |
| fabA | rpoC | pull down                              |
| fabA | rpsA | pull down                              |
| fabA | rpsM | pull down                              |
| fabA | rpsR | pull down                              |
| fabA | rpsB | pull down                              |
| fabA | rpsE | pull down                              |
| fabA | rpsG | pull down                              |
| fabA | rpsI | pull down                              |
| fabA | ffh  | pull down                              |
| fabA | ilvA | pull down                              |
| fabA | tig  | pull down                              |
| fabA | ves  | pull down                              |
| fabA | ybfC | pull down                              |

|      |      |           |
|------|------|-----------|
| fabA | yfdS | pull down |
| fabA | ygeY | pull down |
| fabB | arsB | pull down |
| fabB | hchA | pull down |
| fabB | rplB | pull down |
| fabB | supH | pull down |
| fabB | xisE | pull down |
| fabB | ygaC | pull down |
| fabB | yiaG | pull down |
| fabD | nadE | pull down |
| fabD | ydbC | pull down |
| fabF | acpP | pull down |
| fabF | dcd  | pull down |
| fabF | dnaK | pull down |
| fabF | dnaK | pull down |
| fabF | napG | pull down |
| fabG | chbF | pull down |
| fabG | dbpA | pull down |
| fabG | glpD | pull down |
| fabG | ravA | pull down |
| fabH | cca  | pull down |
| fabH | intS | pull down |
| fabH | nadE | pull down |
| fabI | dnaN | pull down |
| fabI | rho  | pull down |
| fabI | rplJ | pull down |
| fabI | rlmL | pull down |
| fabI | rpsA | pull down |
| fabI | rpsJ | pull down |
| fabI | yfgI | pull down |
| fabI | yjgD | pull down |
| fabZ | clpA | pull down |
| fabZ | tufA | pull down |
| fabZ | gfcD | pull down |
| fabZ | lon  | pull down |
| fabZ | rplA | pull down |

|      |      |           |
|------|------|-----------|
| fabZ | rplJ | pull down |
| fabZ | rplM | pull down |
| fabZ | rplS | pull down |
| fabZ | rplB | pull down |
| fabZ | rplV | pull down |
| fabZ | rplC | pull down |
| fabZ | rplD | pull down |
| fabZ | rplE | pull down |
| fabZ | rplF | pull down |
| fabZ | rplI | pull down |
| fabZ | rpsA | pull down |
| fabZ | rpsB | pull down |
| fabZ | rpsC | pull down |
| fabZ | rpsD | pull down |
| fabZ | rpsE | pull down |
| fabZ | rpsG | pull down |
| fabZ | ffh  | pull down |
| fabZ | glnS | pull down |
| fabZ | yjdA | pull down |

|      |      |           |
|------|------|-----------|
| fdhE | can  | pull down |
| fdhE | cmoA | pull down |
| fdhE | dnaE | pull down |
| fdhE | fdoG | pull down |
| fdhE | gltJ | pull down |
| fdhE | gmhB | pull down |
| fdhE | gyrA | pull down |
| fdhE | htrB | pull down |
| fdhE | kdsD | pull down |
| fdhE | nadE | pull down |
| fdhE | rplN | pull down |
| fdhE | rplQ | pull down |
| fdhE | rplV | pull down |
| fdhE | rplE | pull down |
| fdhE | rplF | pull down |
| fdhE | rpsG | pull down |
| fdhE | rpsI | pull down |
| fdhE | slyD | pull down |

|      |      |           |
|------|------|-----------|
| fdnG | dnaE | pull down |
| fdnG | tufA | pull down |

|      |      |                  |
|------|------|------------------|
| fdnG | tufA | pull down        |
| fdnG | fdhE | pull down        |
| fdnG | fdhE | pull down        |
| fdnG | aceE | pull down        |
| fdnG | aceE | pull down        |
|      |      |                  |
| fdoG | cyaA | pull down        |
| fdoG | polA | pull down        |
| fdoG | fdoH | blue native page |
| fdoG | nadE | pull down        |
| fdoG | ileS | pull down        |

|     |      |           |
|-----|------|-----------|
| fdx | codA | pull down |
| fdx | glpK | pull down |
| fdx | greB | pull down |
| fdx | iscS | pull down |
| fdx | napC | pull down |
| fdx | pepD | pull down |
| fdx | rhIE | pull down |
| fdx | tehB | pull down |

|      |      |                  |
|------|------|------------------|
| fhiA | gph  | two hybrid array |
| fhiA | trmB | two hybrid array |

|      |      |                                    |
|------|------|------------------------------------|
| fimC | fimD | affinity chromatography technology |
| fimC | fimF | affinity chromatography technology |
| fimC | fimF | comigration in sds page            |
| fimC | fimF | x-ray crystallography              |
| fimC | fimG | affinity chromatography technology |
| fimC | fimG | comigration in sds page            |
| fimC | fimG | x-ray crystallography              |
| fimC | fimH | affinity chromatography technology |
| fimC | fimH | comigration in sds page            |
| fimC | fimH | x-ray crystallography              |



|     |      |           |
|-----|------|-----------|
| fis | hupA | pull down |
| fis | dnaK | pull down |
| fis | rplM | pull down |
| fis | rplS | pull down |
| fis | rplB | pull down |
| fis | rplT | pull down |
| fis | rplV | pull down |
| fis | rplW | pull down |
| fis | rplC | pull down |
| fis | rpmG | pull down |
| fis | rplD | pull down |
| fis | rpoC | pull down |
| fis | rpsJ | pull down |
| fis | rpsM | pull down |
| fis | rpsB | pull down |
| fis | rpsC | pull down |
| fis | rpsD | pull down |
| fis | rpsE | pull down |
| fis | thiG | pull down |
| fis | ycgE | pull down |

|      |      |           |
|------|------|-----------|
| fkpA | carA | pull down |
| fkpA | entE | pull down |
| fkpA | xseA | pull down |
| fkpA | lpxB | pull down |
| fkpA | lsrK | pull down |
| fkpA | minD | pull down |
| fkpA | rpsD | pull down |
| fkpA | sxy  | pull down |
| fkpA | ulaR | pull down |
| fkpA | ydhT | pull down |
| fkpA | yeiT | pull down |
| fkpA | ygdL | pull down |
| fkpA | ypdC | pull down |

|      |      |           |
|------|------|-----------|
| fkIB | entB | pull down |
| fkIB | glpF | pull down |
| fkIB | proY | pull down |
| fkIB | trkH | pull down |

|      |      |           |
|------|------|-----------|
| fldA | aidB | pull down |
| fldA | clpA | pull down |
| fldA | dnaN | pull down |
| fldA | fadR | pull down |
| fldA | helD | pull down |
| fldA | hns  | pull down |
| fldA | idnO | pull down |
| fldA | ispG | pull down |
| fldA | lon  | pull down |
| fldA | nrdI | pull down |
| fldA | ribB | pull down |
| fldA | rplB | pull down |
| fldA | rplV | pull down |
| fldA | rpmB | pull down |
| fldA | rpsB | pull down |
| fldA | rpsE | pull down |
| fldA | spoT | pull down |
| fldA | ubiX | pull down |

|      |      |                  |
|------|------|------------------|
| fliC | bioC | pull down        |
| fliC | dnaK | pull down        |
| fliC | fhiA | two hybrid array |
| fliC | nadE | pull down        |
| fliC | aspS | pull down        |
| fliC | proS | pull down        |

|      |      |                  |
|------|------|------------------|
| fliN | fliM | two hybrid array |
| fliN | fliM | two hybrid array |
| fliN | fliN | two hybrid array |

|      |      |                  |
|------|------|------------------|
| fliT | cheA | two hybrid array |
| fliT | flgM | two hybrid array |
| fliT | flhD | two hybrid array |
| fliT | fliD | two hybrid array |
| fliT | fliS | two hybrid array |
| fliT | fliT | two hybrid array |
| fliT | rpe  | two hybrid array |
| fliT | yjeK | two hybrid array |

|     |      |           |
|-----|------|-----------|
| fmt | rfaP | pull down |
| fmt | rplA | pull down |
| fmt | rplQ | pull down |
| fmt | rplD | pull down |

|      |      |                                                   |
|------|------|---------------------------------------------------|
| fmt  | rplI | pull down                                         |
| fmt  | rpsM | pull down                                         |
| fmt  | rpsD | pull down                                         |
| fmt  | rpsG | pull down                                         |
| fmt  | rpsI | pull down                                         |
| fmt  | ydfK | pull down                                         |
| fmt  | ynaE | pull down                                         |
| fnr  | prs  | pull down                                         |
| fnr  | matC | pull down                                         |
| fnr  | nadE | pull down                                         |
| fnr  | phoB | pull down                                         |
| folB | yddJ | pull down                                         |
| folX | rimJ | pull down                                         |
| frdA | pepA | pull down                                         |
| frdA | cydC | pull down                                         |
| frdA | frdB | x-ray crystallography                             |
| frdA | frdB | x-ray crystallography                             |
| frdA | frdB | x-ray crystallography                             |
| frdA | frdB | comigration in non denaturing gel electrophoresis |
| frdA | frdC | x-ray crystallography                             |
| frdA | frdC | x-ray crystallography                             |
| frdA | frdC | x-ray crystallography                             |
| frdA | frdD | x-ray crystallography                             |
| frdA | frdD | x-ray crystallography                             |
| frdA | frdD | x-ray crystallography                             |
| frdA | aceE | comigration in non denaturing gel electrophoresis |
| frdA | ompW | comigration in non denaturing gel electrophoresis |
| frdA | rhsA | pull down                                         |
| frdA | slp  | comigration in non denaturing gel electrophoresis |
| frdA | ybjP | comigration in non denaturing gel electrophoresis |
| frdA | ydcZ | pull down                                         |
| frdA | ydgA | comigration in non denaturing gel electrophoresis |
| frdA | yjiN | pull down                                         |
| frdB | frdA | blue native page                                  |
| fre  | ahpC | pull down                                         |
| fre  | atpD | pull down                                         |
| fre  | intS | pull down                                         |
| fre  | nadE | pull down                                         |
| fre  | puuB | pull down                                         |

|      |      |                                 |
|------|------|---------------------------------|
| fre  | rho  | pull down                       |
| fre  | rplF | pull down                       |
| frlR | topB | pull down                       |
| frmA | glpD | pull down                       |
| frmA | rhIE | pull down                       |
| frmA | yjiR | pull down                       |
| frmR | glpD | pull down                       |
| frmR | adk  | pull down                       |
| ftsQ | ftsA | two hybrid                      |
| ftsQ | ftsB | two hybrid                      |
| ftsQ | ftsI | two hybrid                      |
| ftsQ | ftsL | two hybrid                      |
| ftsQ | ftsQ | two hybrid                      |
| ftsX | ftsA | two hybrid                      |
| ftsX | ftsQ | two hybrid                      |
| ftsX | ftsQ | two hybrid                      |
| ftsZ | add  | pull down                       |
| ftsZ | dnaK | pull down                       |
| ftsZ | fusA | pull down                       |
| ftsZ | tufA | pull down                       |
| ftsZ | ftsA | two hybrid                      |
| ftsZ | ftsE | anti bait coimmunoprecipitation |
| ftsZ | ftsK | pull down                       |
| ftsZ | gatY | pull down                       |
| ftsZ | malK | pull down                       |
| ftsZ | moaC | pull down                       |
| ftsZ | mreB | pull down                       |
| ftsZ | pflB | pull down                       |
| ftsZ | pstB | pull down                       |
| ftsZ | recA | pull down                       |
| ftsZ | rplN | pull down                       |
| ftsZ | rplE | pull down                       |
| ftsZ | rpsJ | pull down                       |
| ftsZ | rpsB | pull down                       |
| ftsZ | rpsD | pull down                       |
| ftsZ | rpsE | pull down                       |
| ftsZ | secA | pull down                       |

|      |      |                       |
|------|------|-----------------------|
| ftsZ | sulA | two hybrid            |
| ftsZ | tatE | pull down             |
| ftsZ | uspG | pull down             |
| ftsZ | yedD | pull down             |
| ftsZ | zipA | x-ray crystallography |

|      |      |           |
|------|------|-----------|
| fucU | lpdA | pull down |
| fucU | rplM | pull down |
| fucU | rplV | pull down |
| fucU | rplL | pull down |

|      |      |           |
|------|------|-----------|
| fumA | fumB | pull down |
| fumA | nadE | pull down |

|      |      |           |
|------|------|-----------|
| fumB | fumA | pull down |
| fumB | aceE | pull down |

|     |      |           |
|-----|------|-----------|
| fur | nadE | pull down |
|-----|------|-----------|

|      |      |           |
|------|------|-----------|
| fxsA | clpB | pull down |
| fxsA | greA | pull down |
| fxsA | rplE | pull down |

|      |      |           |
|------|------|-----------|
| gapA | cpxR | pull down |
| gapA | dnaK | pull down |
| gapA | dnaK | pull down |
| gapA | gatZ | pull down |
| gapA | rpoA | pull down |
| gapA | rpoB | pull down |
| gapA | rpoC | pull down |
| gapA | rpoD | pull down |
| gapA | yfjJ | pull down |

|     |      |                  |
|-----|------|------------------|
| zwf | dnaK | pull down        |
| zwf | nusA | pull down        |
| zwf | pepD | blue native page |
| zwf | pgm  | blue native page |

|      |      |           |
|------|------|-----------|
| gadX | groL | pull down |
| gadX | yfaD | pull down |

|      |      |           |
|------|------|-----------|
| galE | nadE | pull down |
| galE | rsuA | pull down |
| galE | yfcH | pull down |

|      |      |           |
|------|------|-----------|
| galF | arpB | pull down |
| galF | atpD | pull down |
| galF | cdh  | pull down |
| galF | groL | pull down |
| galF | ddpC | pull down |
| galF | dps  | pull down |
| galF | galU | pull down |
| galF | nadE | pull down |

|      |      |           |
|------|------|-----------|
| galM | dnaK | pull down |
| galM | gpmA | pull down |
| galM | nadE | pull down |

|      |      |           |
|------|------|-----------|
| gatD | baeR | pull down |
| gatD | barA | pull down |
| gatD | groL | pull down |
| gatD | dnaK | pull down |
| gatD | glpD | pull down |
| gatD | mukB | pull down |
| gatD | nadE | pull down |
| gatD | nuoG | pull down |
| gatD | mrcA | pull down |
| gatD | rplB | pull down |
| gatD | rpsB | pull down |
| gatD | rpsC | pull down |
| gatD | rpsI | pull down |
| gatD | topA | pull down |
| gatD | yegQ | pull down |

|      |      |           |
|------|------|-----------|
| gatY | dnaK | pull down |
| gatY | dnaK | pull down |
| gatY | tufA | pull down |
| gatY | tufA | pull down |
| gatY | malT | pull down |
| gatY | truA | pull down |

|      |      |           |
|------|------|-----------|
| gatZ | groL | pull down |
|------|------|-----------|

|      |      |                                                   |
|------|------|---------------------------------------------------|
| gatZ | pgi  | pull down                                         |
| gatZ | gatY | comigration in non denaturing gel electrophoresis |

|      |      |           |
|------|------|-----------|
| gcvP | matC | pull down |
| gcvP | nadE | pull down |
| gcvP | pbpC | pull down |
| gcvP | purU | pull down |
| gcvP | rpmE | pull down |
| gcvP | rpoB | pull down |
| gcvP | secA | pull down |
| gcvP | yfhM | pull down |
| gcvP | yhbJ | pull down |

|      |      |           |
|------|------|-----------|
| gcvT | ais  | pull down |
| gcvT | bglA | pull down |
| gcvT | fdnH | pull down |
| gcvT | fdnI | pull down |
| gcvT | pflB | pull down |
| gcvT | ydcS | pull down |

|     |      |           |
|-----|------|-----------|
| glf | groL | pull down |
| glf | nadE | pull down |
| glf | phnN | pull down |

|     |      |           |
|-----|------|-----------|
| glk | nadE | pull down |
| glk | yaaA | pull down |
| glk | ydjF | pull down |

|      |      |           |
|------|------|-----------|
| glmS | dnaJ | pull down |
| glmS | eutH | pull down |
| glmS | rplV | pull down |
| glmS | alaS | pull down |
| glmS | trkH | pull down |
| glmS | ynbD | pull down |
| glmS | yohD | pull down |

|      |      |           |
|------|------|-----------|
| glnA | rplP | pull down |
| glnA | rplQ | pull down |
| glnA | rplB | pull down |



|      |      |            |
|------|------|------------|
| glnA | rpsC | pull down  |
| glnA | ycgE | pull down  |
| glnD | groL | pull down  |
| glnD | glnK | two hybrid |
| glnD | glpD | pull down  |
| glnD | lepA | pull down  |
| glnD | mukB | pull down  |
| glnD | nadE | pull down  |
| glnD | napC | pull down  |
| glnD | recF | pull down  |
| glnD | alaS | pull down  |
| glnD | topA | pull down  |
| glnD | ulaD | pull down  |
| glnD | ytfM | pull down  |
| glnH | ydcP | pull down  |
| glpD | groL | pull down  |
| glpD | dnaJ | pull down  |
| glpD | fliM | pull down  |
| glpD | nadE | pull down  |
| glpD | nifU | pull down  |
| glpD | ribB | pull down  |
| glpD | rplB | pull down  |
| glpD | rpsD | pull down  |
| glpD | rpsE | pull down  |
| glpD | slyD | pull down  |
| glpD | yjgJ | pull down  |
| grxD | bolA | pull down  |
| grxD | csrA | pull down  |
| grxD | cysQ | pull down  |
| grxD | fur  | pull down  |
| grxD | mreB | pull down  |
| grxD | nadE | pull down  |
| grxD | napC | pull down  |

|      |      |           |
|------|------|-----------|
| grxD | nrpI | pull down |
| grxD | nuoE | pull down |
| grxD | selD | pull down |
| grxD | slyD | pull down |
| grxD | yeeT | pull down |

|       |      |           |
|-------|------|-----------|
| glsA1 | fabD | pull down |
| glsA1 | yidA | pull down |

|      |      |           |
|------|------|-----------|
| gltD | gltB | pull down |
| gltD | gltB | pull down |

|      |      |           |
|------|------|-----------|
| glyA | xisE | pull down |
| glyA | ybaO | pull down |
| glyA | yghW | pull down |
| glyA | ymfM | pull down |

|      |      |           |
|------|------|-----------|
| gmhB | fliT | pull down |
| gmhB | rplB | pull down |
| gmhB | rpsO | pull down |
| gmhB | rpsF | pull down |
| gmhB | yjbD | pull down |

|      |      |           |
|------|------|-----------|
| gnsA | lacZ | pull down |
| gnsA | iscS | pull down |
| gnsA | skp  | pull down |
| gnsA | tusA | pull down |
| gnsA | ybaB | pull down |

|      |      |           |
|------|------|-----------|
| gpsA | ahpC | pull down |
| gpsA | speG | pull down |
| gpsA | cadA | pull down |
| gpsA | nadE | pull down |
| gpsA | rho  | pull down |

|      |      |                                                   |
|------|------|---------------------------------------------------|
| gpmA | fbaA | comigration in non denaturing gel electrophoresis |
| gpmA | aroG | pull down                                         |
| gpmA | aslA | pull down                                         |
| gpmA | gpmI | blue native page                                  |
| gpmA | livK | pull down                                         |
| gpmA | mlc  | pull down                                         |
| gpmA | nadE | pull down                                         |
| gpmA | pepD | pull down                                         |
| gpmA | purC | pull down                                         |
| gpmA | rpmB | pull down                                         |
| gpmA | thrS | pull down                                         |
| gpmB | rmuC | pull down                                         |
| gpmI | cadA | pull down                                         |
| gpmI | nadE | pull down                                         |
| grcA | matC | pull down                                         |
| grcA | parE | pull down                                         |
| grcA | pflB | pull down                                         |
| grcA | pflB | pull down                                         |
| grcA | pflB | pull down                                         |
| grcA | rplD | pull down                                         |
| grcA | rpsT | pull down                                         |
| grcA | lysU | pull down                                         |
| grcA | tdcE | pull down                                         |
| grcA | tpiA | pull down                                         |
| grcA | ydiP | pull down                                         |
| greA | adhE | pull down                                         |
| greA | atpD | pull down                                         |
| greA | carB | pull down                                         |
| greA | clpX | pull down                                         |
| greA | dnaK | pull down                                         |
| greA | tufA | pull down                                         |
| greA | gapA | pull down                                         |
| greA | gatZ | pull down                                         |
| greA | guaB | pull down                                         |
| greA | prs  | pull down                                         |
| greA | metE | pull down                                         |
| greA | nadE | pull down                                         |
| greA | aceE | pull down                                         |
| greA | ptsI | pull down                                         |
| greA | rho  | pull down                                         |
| greA | rplJ | pull down                                         |

|      |      |           |
|------|------|-----------|
| greA | rplM | pull down |
| greA | rplB | pull down |
| greA | rplD | pull down |
| greA | rplE | pull down |
| greA | rpoA | pull down |
| greA | rpoB | pull down |
| greA | rpoC | pull down |
| greA | rpsJ | pull down |
| greA | rpsB | pull down |
| greA | rpsE | pull down |
| greA | rpsG | pull down |
| greA | secA | pull down |
| greA | thrS | pull down |
| greA | ybiB | pull down |
| greA | yeaG | pull down |
| greA | yfiF | pull down |

|      |      |           |
|------|------|-----------|
| grpE | ccmB | pull down |
| grpE | clpB | pull down |
| grpE | gadA | pull down |
| grpE | gadB | pull down |
| grpE | dnaK | pull down |
| grpE | dnaK | pull down |
| grpE | dnaK | pull down |
| grpE | dsdX | pull down |
| grpE | tufA | pull down |
| grpE | emrY | pull down |
| grpE | entB | pull down |
| grpE | evgA | pull down |
| grpE | flgK | pull down |
| grpE | fur  | pull down |
| grpE | greA | pull down |
| grpE | lon  | pull down |
| grpE | matC | pull down |
| grpE | metK | pull down |
| grpE | mntH | pull down |
| grpE | nadE | pull down |
| grpE | nusG | pull down |
| grpE | paaB | pull down |
| grpE | pepD | pull down |
| grpE | phnN | pull down |
| grpE | rho  | pull down |
| grpE | rplJ | pull down |
| grpE | rplN | pull down |
| grpE | rplO | pull down |

|      |      |           |
|------|------|-----------|
| grpE | rplQ | pull down |
| grpE | rplS | pull down |
| grpE | rplS | pull down |
| grpE | rpmG | pull down |
| grpE | rplD | pull down |
| grpE | rplL | pull down |
| grpE | rpsB | pull down |
| grpE | rpsE | pull down |
| grpE | rpsG | pull down |
| grpE | rpsI | pull down |
| grpE | sra  | pull down |
| grpE | tauB | pull down |
| grpE | thiG | pull down |
| grpE | torZ | pull down |
| grpE | ubiX | pull down |
| grpE | ykgF | pull down |
| grpE | zntR | pull down |

|      |      |           |
|------|------|-----------|
| gshA | mdoD | pull down |
| gshA | ydcP | pull down |

|     |      |           |
|-----|------|-----------|
| gor | nadE | pull down |
|-----|------|-----------|

|      |      |           |
|------|------|-----------|
| gspE | rplB | pull down |
|------|------|-----------|

|      |      |           |
|------|------|-----------|
| guaA | nadE | pull down |
| guaA | phnN | pull down |

|      |      |                  |
|------|------|------------------|
| gyrA | aspC | pull down        |
| gyrA | add  | pull down        |
| gyrA | cheY | two hybrid array |
| gyrA | clpA | pull down        |
| gyrA | lpdA | pull down        |
| gyrA | dnaJ | pull down        |
| gyrA | dnaK | pull down        |
| gyrA | tufA | pull down        |
| gyrA | tufA | pull down        |
| gyrA | flgM | two hybrid array |
| gyrA | fliG | two hybrid array |
| gyrA | ftsZ | pull down        |
| gyrA | gyrA | two hybrid array |

|      |      |                                                   |
|------|------|---------------------------------------------------|
| gyrA | gyrB | pull down                                         |
| gyrA | gyrB | pull down                                         |
| gyrA | idnO | pull down                                         |
| gyrA | malk | pull down                                         |
| gyrA | metK | pull down                                         |
| gyrA | mreB | pull down                                         |
| gyrA | nrdI | pull down                                         |
| gyrA | aceF | pull down                                         |
| gyrA | pstB | pull down                                         |
| gyrA | ycgC | pull down                                         |
| gyrA | recA | pull down                                         |
| gyrA | rho  | pull down                                         |
| gyrA | rpmA | two hybrid array                                  |
| gyrA | rpsS | two hybrid array                                  |
| gyrA | rpsB | pull down                                         |
| gyrA | rpsB | pull down                                         |
| gyrA | rsmG | two hybrid array                                  |
| gyrA | rtcB | pull down                                         |
| gyrA | ffh  | pull down                                         |
| gyrA | glyS | pull down                                         |
| gyrA | argS | pull down                                         |
| gyrA | yfaS | pull down                                         |
| gyrA | yjfZ | pull down                                         |
| gyrA | zraS | pull down                                         |
| gyrB | bglJ | pull down                                         |
| gyrB | deaD | pull down                                         |
| gyrB | tufA | pull down                                         |
| gyrB | tufA | pull down                                         |
| gyrB | gyrA | pull down                                         |
| gyrB | gyrA | pull down                                         |
| gyrB | gyrA | comigration in non denaturing gel electrophoresis |
| gyrB | metK | pull down                                         |
| gyrB | parE | pull down                                         |
| gyrB | prsA | pull down                                         |
| gyrB | rplJ | pull down                                         |
| gyrB | rplW | pull down                                         |
| gyrB | rpsB | pull down                                         |
| gyrB | glyS | pull down                                         |
| gyrB | yacG | pull down                                         |
| gyrB | yacG | pull down                                         |
| hchA | djlA | pull down                                         |

|      |      |           |
|------|------|-----------|
| hchA | nadE | pull down |
| hchA | tnaA | pull down |

|      |      |           |
|------|------|-----------|
| hdhA | groL | pull down |
| hdhA | rpsO | pull down |
| hdhA | uspG | pull down |

|      |      |           |
|------|------|-----------|
| helD | atpD | pull down |
| helD | accB | pull down |
| helD | groL | pull down |
| helD | groL | pull down |
| helD | csrA | pull down |
| helD | gadB | pull down |
| helD | dnaK | pull down |
| helD | dnaK | pull down |
| helD | tufA | pull down |
| helD | tufA | pull down |
| helD | gapA | pull down |
| helD | gcvP | pull down |
| helD | infB | pull down |
| helD | lipA | pull down |
| helD | pflB | pull down |
| helD | pgk  | pull down |
| helD | ptsI | pull down |
| helD | rplU | pull down |
| helD | rplC | pull down |
| helD | rplD | pull down |
| helD | rplL | pull down |
| helD | rpsA | pull down |
| helD | rpsG | pull down |
| helD | tpiA | pull down |

|      |      |           |
|------|------|-----------|
| hemB | fadH | pull down |
| hemB | hisJ | pull down |
| hemB | sanA | pull down |

|      |      |                  |
|------|------|------------------|
| hfIC | hybC | blue native page |
|------|------|------------------|

|      |      |                  |
|------|------|------------------|
| hfIC | rplB | pull down        |
| hfIC | wecG | pull down        |
| hfIC | yfgL | blue native page |

|     |      |           |
|-----|------|-----------|
| hfq | aidB | pull down |
| hfq | cspC | pull down |
| hfq | csrA | pull down |
| hfq | hupA | pull down |
| hfq | hupA | pull down |
| hfq | hupB | pull down |
| hfq | deaD | pull down |
| hfq | dnaJ | pull down |
| hfq | dnaK | pull down |
| hfq | tufA | pull down |
| hfq | eno  | pull down |
| hfq | hrpA | pull down |
| hfq | lon  | pull down |
| hfq | lpxD | pull down |
| hfq | nfi  | pull down |
| hfq | pnp  | pull down |
| hfq | rho  | pull down |
| hfq | rho  | pull down |
| hfq | rplA | pull down |
| hfq | rplM | pull down |
| hfq | rplN | pull down |
| hfq | rplO | pull down |
| hfq | rplS | pull down |
| hfq | rplB | pull down |
| hfq | rplB | pull down |
| hfq | rplT | pull down |
| hfq | rplU | pull down |
| hfq | rplV | pull down |
| hfq | rplX | pull down |
| hfq | rpmB | pull down |
| hfq | rplC | pull down |
| hfq | rplC | pull down |
| hfq | rplD | pull down |
| hfq | rplD | pull down |
| hfq | rplL | pull down |
| hfq | rplI | pull down |
| hfq | rlmL | pull down |



|     |      |           |
|-----|------|-----------|
| hfq | rluB | pull down |
| hfq | rne  | pull down |
| hfq | rng  | pull down |
| hfq | rnr  | pull down |
| hfq | rnr  | pull down |
| hfq | rob  | pull down |
| hfq | rpoA | pull down |
| hfq | rpoB | pull down |
| hfq | rpoC | pull down |
| hfq | rpsA | pull down |
| hfq | rpsA | pull down |
| hfq | rpsM | pull down |
| hfq | rpsM | pull down |
| hfq | rpsP | pull down |
| hfq | rpsR | pull down |
| hfq | rpsB | pull down |
| hfq | rpsB | pull down |
| hfq | rpsC | pull down |
| hfq | rpsD | pull down |
| hfq | rpsD | pull down |
| hfq | rpsE | pull down |
| hfq | rpsF | pull down |
| hfq | rpsG | pull down |
| hfq | secA | pull down |
| hfq | selB | pull down |
| hfq | skp  | pull down |
| hfq | skp  | pull down |
| hfq | spoT | pull down |
| hfq | tgt  | pull down |
| hfq | tig  | pull down |
| hfq | uspG | pull down |
| hfq | yciH | pull down |
| hfq | yfiF | pull down |
| hfq | ygbA | pull down |
| hfq | ygiF | pull down |

|      |      |           |
|------|------|-----------|
| hinT | accA | pull down |
| hinT | atpG | pull down |
| hinT | dnaK | pull down |
| hinT | dnaN | pull down |
| hinT | tufA | pull down |
| hinT | mltD | pull down |
| hinT | mukB | pull down |
| hinT | nadE | pull down |
| hinT | nuoI | pull down |

|      |      |           |
|------|------|-----------|
| hinT | tpx  | pull down |
| hinT | ydeP | pull down |
| hinT | yhbJ | pull down |
| hinT | yjhH | pull down |

|      |      |           |
|------|------|-----------|
| hisA | dnaK | pull down |
| hisA | relE | pull down |

|      |      |           |
|------|------|-----------|
| hisB | gltB | pull down |
| hisB | helD | pull down |

|      |      |           |
|------|------|-----------|
| hisC | hipA | pull down |
| hisC | hisD | pull down |
| hisC | pheA | pull down |

|      |      |           |
|------|------|-----------|
| hldD | groL | pull down |
| hldD | cysM | pull down |
| hldD | ddpD | pull down |
| hldD | dnaK | pull down |
| hldD | entF | pull down |
| hldD | rplO | pull down |
| hldD | rplS | pull down |
| hldD | rplC | pull down |
| hldD | rpsG | pull down |
| hldD | rpsG | pull down |
| hldD | secA | pull down |
| hldD | torA | pull down |
| hldD | ybjX | pull down |
| hldD | ydaY | pull down |
| hldD | yhhN | pull down |
| hldD | yhjS | pull down |

|     |      |           |
|-----|------|-----------|
| hns | cnu  | pull down |
| hns | hupA | pull down |
| hns | prs  | pull down |
| hns | malQ | pull down |
| hns | aceE | pull down |
| hns | malP | pull down |
| hns | rplN | pull down |

|     |      |           |
|-----|------|-----------|
| hns | rplV | pull down |
| hns | rplX | pull down |
| hns | rpoB | pull down |
| hns | rpoC | pull down |
| hns | rpsB | pull down |
| hns | rpsB | pull down |
| hns | ruvC | pull down |
| hns | secA | pull down |
| hns | ssb  | pull down |
| hns | stpA | pull down |
| hns | stpA | pull down |
| hns | sxy  | pull down |
| hns | tig  | pull down |
| hns | xisE | pull down |
| hns | ynbC | pull down |

|      |      |           |
|------|------|-----------|
| hrpA | lpdA | pull down |
| hrpA | tufA | pull down |
| hrpA | aceE | pull down |
| hrpA | aceF | pull down |
| hrpA | rplI | pull down |
| hrpA | rpsA | pull down |
| hrpA | rpsM | pull down |
| hrpA | rpsS | pull down |
| hrpA | rpsB | pull down |
| hrpA | rpsC | pull down |
| hrpA | rpsE | pull down |
| hrpA | rpsG | pull down |
| hrpA | yfiF | pull down |

|      |      |           |
|------|------|-----------|
| hscA | ahpC | pull down |
| hscA | cybC | pull down |
| hscA | cedA | pull down |
| hscA | cheZ | pull down |
| hscA | fliT | pull down |

|      |      |           |
|------|------|-----------|
| hscA | gnsA | pull down |
| hscA | nifU | pull down |
| hscA | pepB | pull down |
| hscA | chbA | pull down |
| hscA | rplJ | pull down |
| hscA | rplJ | pull down |
| hscA | rplN | pull down |
| hscA | rplQ | pull down |
| hscA | rplB | pull down |
| hscA | rplT | pull down |
| hscA | rplE | pull down |
| hscA | rplF | pull down |
| hscA | rplL | pull down |
| hscA | rpsC | pull down |
| hscA | rpsD | pull down |
| hscA | rpsE | pull down |
| hscA | rpsI | pull down |
| hscA | secA | pull down |
| hscA | ugpB | pull down |
| hscA | ygeQ | pull down |
| hscA | ygjQ | pull down |

|      |      |           |
|------|------|-----------|
| hslO | arcB | pull down |
| hslO | tufA | pull down |
| hslO | tufA | pull down |
| hslO | nikD | pull down |
| hslO | rplC | pull down |
| hslO | rpsJ | pull down |
| hslO | rpsL | pull down |
| hslO | rpsB | pull down |
| hslO | rpsC | pull down |
| hslO | rpsE | pull down |
| hslO | rpsG | pull down |

|      |      |           |
|------|------|-----------|
| hslR | dnaK | pull down |
| hslR | mliC | pull down |
| hslR | phoB | pull down |
| hslR | rho  | pull down |
| hslR | rplA | pull down |
| hslR | rplM | pull down |
| hslR | rplN | pull down |
| hslR | rplS | pull down |
| hslR | rplB | pull down |
| hslR | rplV | pull down |
| hslR | rpmB | pull down |

|      |      |           |
|------|------|-----------|
| hslR | rplD | pull down |
| hslR | rplI | pull down |
| hslR | rpsJ | pull down |
| hslR | rpsB | pull down |
| hslR | rpsB | pull down |
| hslR | rpsC | pull down |
| hslR | rpsD | pull down |
| hslR | rpsE | pull down |
| hslR | rpsG | pull down |
| hslR | rtcB | pull down |
| hslR | sbcC | pull down |
| hslR | yagG | pull down |
| hslR | ycfS | pull down |

|      |      |                       |
|------|------|-----------------------|
| hslU | accC | pull down             |
| hslU | accD | pull down             |
| hslU | thrA | pull down             |
| hslU | accB | pull down             |
| hslU | cca  | pull down             |
| hslU | ccmB | pull down             |
| hslU | cysW | pull down             |
| hslU | mglB | pull down             |
| hslU | dnaJ | pull down             |
| hslU | dnaJ | pull down             |
| hslU | dnaK | pull down             |
| hslU | dnaK | pull down             |
| hslU | fusA | pull down             |
| hslU | tufA | pull down             |
| hslU | tufA | pull down             |
| hslU | ftsZ | pull down             |
| hslU | gatZ | pull down             |
| hslU | gpmB | pull down             |
| hslU | hslU | two hybrid            |
| hslU | hslV | pull down             |
| hslU | hslV | x-ray crystallography |
| hslU | hslV | two hybrid            |
| hslU | iciA | pull down             |
| hslU | lon  | pull down             |
| hslU | metE | pull down             |
| hslU | metK | pull down             |
| hslU | mreB | pull down             |
| hslU | narG | pull down             |

|      |      |            |
|------|------|------------|
| hslU | nuoC | pull down  |
| hslU | ompX | pull down  |
| hslU | pstB | pull down  |
| hslU | recA | pull down  |
| hslU | ribD | pull down  |
| hslU | rplJ | pull down  |
| hslU | rplM | pull down  |
| hslU | rplP | pull down  |
| hslU | rplC | pull down  |
| hslU | rplD | pull down  |
| hslU | rplL | pull down  |
| hslU | rpsJ | pull down  |
| hslU | rpsB | pull down  |
| hslU | rpsE | pull down  |
| hslU | rpsG | pull down  |
| hslU | secA | pull down  |
| hslU | sulA | two hybrid |
| hslU | ydeN | pull down  |
| hslU | ydgA | pull down  |
| hslU | ygeG | pull down  |

|      |      |            |
|------|------|------------|
| hslV | accA | pull down  |
| hslV | accC | pull down  |
| hslV | accD | pull down  |
| hslV | accB | pull down  |
| hslV | ccmB | pull down  |
| hslV | deaD | pull down  |
| hslV | tufA | pull down  |
| hslV | gabP | pull down  |
| hslV | hslU | pull down  |
| hslV | hslV | two hybrid |
| hslV | prs  | pull down  |
| hslV | rplJ | pull down  |
| hslV | rplQ | pull down  |
| hslV | rplS | pull down  |
| hslV | rplB | pull down  |
| hslV | rplU | pull down  |
| hslV | rplV | pull down  |
| hslV | rplV | pull down  |
| hslV | rplX | pull down  |
| hslV | rpmC | pull down  |
| hslV | rplC | pull down  |
| hslV | rplC | pull down  |
| hslV | rpmG | pull down  |
| hslV | rplD | pull down  |

|      |      |           |
|------|------|-----------|
| hsIV | rplD | pull down |
| hsIV | rplL | pull down |
| hsIV | rplI | pull down |
| hsIV | rluB | pull down |
| hsIV | rpsM | pull down |
| hsIV | rpsP | pull down |
| hsIV | rpsG | pull down |
| hsIV | tpiA | pull down |
| hsIV | yggN | pull down |
| hsIV | yghT | pull down |
| hsIV | yhjD | pull down |
| hsIV | yihI | pull down |

|      |      |           |
|------|------|-----------|
| htpG | hemF | pull down |
| htpG | hyfG | pull down |
| htpG | mcrB | pull down |
| htpG | pepB | pull down |
| htpG | rplB | pull down |
| htpG | rpmC | pull down |
| htpG | rpmG | pull down |
| htpG | rpoC | pull down |
| htpG | rpsF | pull down |
| htpG | rpsG | pull down |
| htpG | ugpB | pull down |
| htpG | ycbW | pull down |
| htpG | yeal | pull down |
| htpG | yggR | pull down |

|      |      |           |
|------|------|-----------|
| hybD | greB | pull down |
| hybD | rplB | pull down |
| hybD | yddH | pull down |
| hybD | yibL | pull down |

|      |      |           |
|------|------|-----------|
| iadA | dnaE | pull down |
| iadA | rhsD | pull down |

|      |      |           |
|------|------|-----------|
| iadA | topA | pull down |
| iadA | ygaE | pull down |
| iclR | hldD | pull down |
| iclR | aceF | pull down |
| iclR | rplA | pull down |
| iclR | rplM | pull down |
| iclR | rplT | pull down |
| iclR | rplU | pull down |
| iclR | rplV | pull down |
| iclR | rplX | pull down |
| iclR | rplD | pull down |
| iclR | rpsM | pull down |
| iclR | rpsN | pull down |
| iclR | rpsB | pull down |
| iclR | rpsC | pull down |
| iclR | rpsE | pull down |
| iclR | rpsF | pull down |
| iclR | rpsG | pull down |
| iclR | rpsH | pull down |
| icd  | nadE | pull down |
| icd  | yfdS | pull down |
| icd  | yibL | pull down |
| icd  | yneG | pull down |
| infA | acrB | pull down |
| infA | lacZ | pull down |
| infA | nadE | pull down |
| infB | adhP | pull down |
| infB | arpA | pull down |
| infB | artM | pull down |
| infB | dnaK | pull down |
| infB | ebgC | pull down |
| infB | fliJ | pull down |
| infB | greA | pull down |
| infB | grpE | pull down |
| infB | metN | pull down |
| infB | mhpR | pull down |
| infB | phoA | pull down |
| infB | phoA | pull down |
| infB | rhIE | pull down |
| infB | ribD | pull down |
| infB | uup  | pull down |



|      |      |           |
|------|------|-----------|
| infB | ybiB | pull down |
| infB | yedJ | pull down |
| infB | ygfZ | pull down |
| infC | ccmB | pull down |
| infC | dacA | pull down |
| infC | hupB | pull down |
| infC | rng  | pull down |
| infC | sufC | pull down |
| infC | yfiF | pull down |
| infC | yhbY | pull down |
| infC | ynbC | pull down |
| ihfA | alpA | pull down |
| ihfA | dnaK | pull down |
| ihfA | ihfB | pull down |
| ihfA | nadE | pull down |
| ihfA | rplA | pull down |
| ihfA | rplN | pull down |
| ihfA | rplC | pull down |
| ihfA | rplE | pull down |
| ihfA | rpsB | pull down |
| ihfA | rpsD | pull down |
| ihfA | rpsD | pull down |
| ihfA | yehB | pull down |
| ihfB | aroB | pull down |
| ihfB | hupA | pull down |
| ihfB | hupB | pull down |
| ihfB | gltS | pull down |
| ihfB | ihfA | pull down |
| ihfB | nusA | pull down |
| ihfB | rplA | pull down |
| ihfB | rplM | pull down |
| ihfB | rplO | pull down |
| ihfB | rplP | pull down |
| ihfB | rplS | pull down |
| ihfB | rplB | pull down |
| ihfB | rplU | pull down |
| ihfB | rplV | pull down |
| ihfB | rplW | pull down |
| ihfB | rpmC | pull down |
| ihfB | rplC | pull down |
| ihfB | rpmG | pull down |
| ihfB | rplD | pull down |

|      |      |           |
|------|------|-----------|
| ihfB | rplE | pull down |
| ihfB | rpoC | pull down |
| ihfB | rpsM | pull down |
| ihfB | rpsS | pull down |
| ihfB | rpsC | pull down |
| ihfB | rpsD | pull down |
| ihfB | rpsE | pull down |
| ihfB | rpsF | pull down |
| ihfB | rpsG | pull down |
| ihfB | rpsH | pull down |
| ihfB | uxuB | pull down |
| ihfB | yhbY | pull down |
| ihfB | yjgD | pull down |

|     |     |                       |
|-----|-----|-----------------------|
| cdi | cda | x-ray crystallography |
| cdi | cda | x-ray crystallography |

|      |      |           |
|------|------|-----------|
| intS | cspG | pull down |
| intS | lpdA | pull down |
| intS | aceF | pull down |
| intS | aceF | pull down |

|     |      |           |
|-----|------|-----------|
| ppa | acpT | pull down |
| ppa | actP | pull down |
| ppa | atoD | pull down |
| ppa | groL | pull down |
| ppa | dadA | pull down |
| ppa | degQ | pull down |
| ppa | dnaK | pull down |
| ppa | dnaN | pull down |
| ppa | tufA | pull down |
| ppa | hemG | pull down |
| ppa | hldD | pull down |
| ppa | katG | pull down |
| ppa | msrA | pull down |
| ppa | rhIE | pull down |
| ppa | rplJ | pull down |
| ppa | rplM | pull down |
| ppa | rplN | pull down |

|     |      |           |
|-----|------|-----------|
| ppa | rplS | pull down |
| ppa | rplV | pull down |
| ppa | rpmB | pull down |
| ppa | rplC | pull down |
| ppa | rplD | pull down |
| ppa | rplD | pull down |
| ppa | rplI | pull down |
| ppa | rpsJ | pull down |
| ppa | rpsN | pull down |
| ppa | rpsB | pull down |
| ppa | rpsT | pull down |
| ppa | rpsC | pull down |
| ppa | rpsE | pull down |
| ppa | rpsG | pull down |
| ppa | rpsH | pull down |
| ppa | secB | pull down |
| ppa | slyD | pull down |
| ppa | tig  | pull down |
| ppa | tig  | pull down |
| ppa | ybgQ | pull down |
| ppa | yjgD | pull down |

|      |      |                 |
|------|------|-----------------|
| iscA | dps  | pull down       |
| iscA | fdx  | pull down       |
| iscA | fdx  | enzymatic study |
| iscA | msrA | pull down       |
| iscA | rplB | pull down       |
| iscS | lacZ | pull down       |
| iscS | bioC | pull down       |
| iscS | dnaK | pull down       |
| iscS | fdhD | pull down       |
| iscS | greA | pull down       |
| iscS | lpxB | pull down       |
| iscS | mltD | pull down       |
| iscS | nadE | pull down       |
| iscS | napC | pull down       |
| iscS | nifU | pull down       |
| iscS | nifU | pull down       |
| iscS | nifU | pull down       |
| iscS | npdA | pull down       |
| iscS | rpsI | pull down       |
| iscS | tusA | pull down       |
| iscS | ydbH | pull down       |

|      |      |           |
|------|------|-----------|
| ispF | caiF | pull down |
| ispF | flgD | pull down |
| ispE | glmS | pull down |
| ispF | hldD | pull down |
| ispF | rpsJ | pull down |
| ispF | rpsD | pull down |
| ispF | yqgC | pull down |

|      |      |           |
|------|------|-----------|
| fruK | fruB | pull down |
| fruK | ygjQ | pull down |

|      |      |           |
|------|------|-----------|
| pfkA | argG | pull down |
| pfkA | fpr  | pull down |
| pfkA | aspS | pull down |
| pfkA | tpiA | pull down |

|     |      |           |
|-----|------|-----------|
| adk | kdpB | pull down |
| adk | galS | pull down |
| adk | htpG | pull down |
| adk | rpoC | pull down |
| adk | ybdL | pull down |

|      |      |           |
|------|------|-----------|
| katG | fepE | pull down |
| katG | mhpR | pull down |
| katG | nadE | pull down |
| katG | ybiH | pull down |

|     |      |           |
|-----|------|-----------|
| kbl | groL | pull down |
| kbl | plsB | pull down |
| kbl | rplD | pull down |
| kbl | tdh  | pull down |

|      |      |           |
|------|------|-----------|
| kdsB | hupB | pull down |
| kdsB | dcuR | pull down |
| kdsB | sdhA | pull down |
| kdsB | dnaJ | pull down |
| kdsB | dnaK | pull down |
| kdsB | tufA | pull down |
| kdsB | nadE | pull down |
| kdsB | pepB | pull down |

|      |      |           |
|------|------|-----------|
| kdsB | rplK | pull down |
| kdsB | rplD | pull down |
| kdsB | rplL | pull down |
| kdsB | rpsA | pull down |
| kdsB | yfbS | pull down |
| kdsB | yjaH | pull down |

|      |      |           |
|------|------|-----------|
| kdsC | plsB | pull down |
| kdsC | sapF | pull down |

|     |      |           |
|-----|------|-----------|
| gmk | ilvC | pull down |
| gmk | rplP | pull down |
| gmk | rpsI | pull down |
| gmk | ybcK | pull down |
| gmk | ybfD | pull down |

|      |      |           |
|------|------|-----------|
| thrB | groL | pull down |
| thrB | glpD | pull down |

|     |      |                  |
|-----|------|------------------|
| prs | groL | pull down        |
| prs | rbsK | blue native page |

|      |      |           |
|------|------|-----------|
| pykF | cyaA | pull down |
| pykF | deoD | pull down |
| pykF | dnaK | pull down |
| pykF | gfcD | pull down |
| pykF | prs  | pull down |
| pykF | lptD | pull down |
| pykF | hybO | pull down |
| pykF | nadE | pull down |
| pykF | pflB | pull down |
| pykF | rbsR | pull down |
| pykF | sxy  | pull down |
| pykF | tyrS | pull down |
| pykF | yheS | pull down |
| pykF | yjcC | pull down |
| pykF | yral | pull down |

|      |      |           |
|------|------|-----------|
| pykA | dnaK | pull down |
|------|------|-----------|

|      |      |                  |
|------|------|------------------|
| pykA | fhuA | pull down        |
| pykA | fimB | pull down        |
| pykA | Int  | pull down        |
| pykA | mutS | pull down        |
| pykA | otsB | pull down        |
| pykA | pflB | pull down        |
| pykA | ppk  | pull down        |
| pykA | malX | pull down        |
| pykA | thrS | pull down        |
| pykA | tig  | pull down        |
| pykA | tig  | pull down        |
| pykA | yggR | pull down        |
| ldhA | nadE | pull down        |
| ldhA | uvrY | pull down        |
| ldhA | yfjJ | pull down        |
| lepB | lepB | blue native page |
| lepA | argA | pull down        |
| lepA | hyfE | pull down        |
| lepA | macA | pull down        |
| lepA | psuG | pull down        |
| lepA | puuP | pull down        |
| lepA | recE | pull down        |
| lepA | rplM | pull down        |
| lepA | rplV | pull down        |
| lepA | rplX | pull down        |
| lepA | rplD | pull down        |
| lepA | rplI | pull down        |
| lepA | rpsJ | pull down        |
| lepA | rpsB | pull down        |
| lepA | rpsE | pull down        |
| lepA | rpsF | pull down        |
| lepA | rpsG | pull down        |
| lepA | yidX | pull down        |
| lepA | zntB | pull down        |
| lipA | groL | pull down        |
| lipA | dnaK | pull down        |
| lipA | gabT | pull down        |
| lipA | nadE | pull down        |
| lipA | tatE | pull down        |
| lipA | ybaQ | pull down        |
| lipA | yibL | pull down        |

|      |       |           |
|------|-------|-----------|
| lldD | groL  | pull down |
| lldD | hldD  | pull down |
| lldD | insH1 | pull down |
| lldD | insH1 | pull down |
| lldD | glnG  | pull down |
| lldD | rplV  | pull down |
| lldD | rpmB  | pull down |
| lldD | rpsB  | pull down |
| lldD | rpsD  | pull down |
| lldD | glyQ  | pull down |
| lldD | yicR  | pull down |

|     |      |           |
|-----|------|-----------|
| lon | dnaA | pull down |
| lon | dnaX | pull down |
| lon | tufA | pull down |
| lon | fsaA | pull down |
| lon | nadE | pull down |
| lon | rplM | pull down |
| lon | rplM | pull down |
| lon | rplT | pull down |
| lon | rplU | pull down |
| lon | rplV | pull down |
| lon | rplC | pull down |
| lon | rplI | pull down |
| lon | rplI | pull down |
| lon | rpsB | pull down |
| lon | rpsC | pull down |
| lon | rpsG | pull down |
| lon | rpsH | pull down |
| lon | sapF | pull down |
| lon | secB | pull down |
| lon | ssb  | pull down |
| lon | yjgL | pull down |

|     |      |                  |
|-----|------|------------------|
| lpp | lolA | pull down        |
| lpp | lpp  | blue native page |

|      |      |           |
|------|------|-----------|
| lpxA | acnA | pull down |
| lpxA | fhuB | pull down |
| lpxA | ftsH | pull down |
| lpxA | fur  | pull down |
| lpxA | hcaB | pull down |

|      |      |           |
|------|------|-----------|
| lpxA | hfq  | pull down |
| lpxA | mltD | pull down |
| lpxA | nrdI | pull down |
| lpxA | queF | pull down |
| lpxA | ribB | pull down |
| lpxA | rplJ | pull down |
| lpxA | rplM | pull down |
| lpxA | rplN | pull down |
| lpxA | rplO | pull down |
| lpxA | rplQ | pull down |
| lpxA | rplT | pull down |
| lpxA | rplU | pull down |
| lpxA | rplV | pull down |
| lpxA | rplX | pull down |
| lpxA | rpmB | pull down |
| lpxA | rplC | pull down |
| lpxA | rpmG | pull down |
| lpxA | rplF | pull down |
| lpxA | rplF | pull down |
| lpxA | rplL | pull down |
| lpxA | rpsJ | pull down |
| lpxA | rpsB | pull down |
| lpxA | rpsT | pull down |
| lpxA | rpsD | pull down |
| lpxA | rpsI | pull down |
| lpxA | tyrB | pull down |
| lpxA | yciH | pull down |
| lpxA | ydjI | pull down |
| lpxA | yibL | pull down |

|      |      |           |
|------|------|-----------|
| lpxB | groL | pull down |
| lpxB | dadA | pull down |
| lpxB | sdhA | pull down |
| lpxB | dnaJ | pull down |
| lpxB | tufA | pull down |
| lpxB | tufA | pull down |
| lpxB | fur  | pull down |
| lpxB | glpD | pull down |
| lpxB | prs  | pull down |
| lpxB | mreB | pull down |
| lpxB | ppsA | pull down |
| lpxB | rplJ | pull down |
| lpxB | rplM | pull down |
| lpxB | rplS | pull down |
| lpxB | rpsB | pull down |



|      |      |           |
|------|------|-----------|
| lpxB | torC | pull down |
| lpxB | uppP | pull down |
| lpxB | uspG | pull down |
| lpxD | ydgl | pull down |
| lpxD | aspA | pull down |
| lpxD | cbpA | pull down |
| lpxD | cbpA | pull down |
| lpxD | ccmB | pull down |
| lpxD | csdA | pull down |
| lpxD | sdhA | pull down |
| lpxD | dnaJ | pull down |
| lpxD | hldD | pull down |
| lpxD | lpxA | pull down |
| lpxD | phnA | pull down |
| lpxD | pssA | pull down |
| lpxD | rho  | pull down |
| lpxD | rplA | pull down |
| lpxD | rplK | pull down |
| lpxD | rplM | pull down |
| lpxD | rplO | pull down |
| lpxD | rplO | pull down |
| lpxD | rplP | pull down |
| lpxD | rplR | pull down |
| lpxD | rplS | pull down |
| lpxD | rplB | pull down |
| lpxD | rplB | pull down |
| lpxD | rplT | pull down |
| lpxD | rplU | pull down |
| lpxD | rplU | pull down |
| lpxD | rplV | pull down |
| lpxD | rplX | pull down |
| lpxD | rplC | pull down |
| lpxD | rpmG | pull down |
| lpxD | rplD | pull down |
| lpxD | rplD | pull down |
| lpxD | rplD | pull down |
| lpxD | rplL | pull down |
| lpxD | rplI | pull down |
| lpxD | rplI | pull down |
| lpxD | rlmL | pull down |
| lpxD | rluB | pull down |
| lpxD | rnk  | pull down |
| lpxD | rpoC | pull down |
| lpxD | rpsJ | pull down |

|      |      |           |
|------|------|-----------|
| lpxD | rpsM | pull down |
| lpxD | rpsP | pull down |
| lpxD | rpsR | pull down |
| lpxD | rpsR | pull down |
| lpxD | rpsB | pull down |
| lpxD | rpsB | pull down |
| lpxD | rpsT | pull down |
| lpxD | rpsC | pull down |
| lpxD | rpsC | pull down |
| lpxD | rpsC | pull down |
| lpxD | rpsD | pull down |
| lpxD | rpsD | pull down |
| lpxD | rpsD | pull down |
| lpxD | rpsE | pull down |
| lpxD | rpsE | pull down |
| lpxD | rpsG | pull down |
| lpxD | rpsG | pull down |
| lpxD | rpsG | pull down |
| lpxD | rpsH | pull down |
| lpxD | rpsI | pull down |
| lpxD | glnS | pull down |
| lpxD | tyrA | pull down |
| lpxD | ydfR | pull down |
| lpxD | yfiF | pull down |
| lpxD | yhbY | pull down |
| lpxD | yjfl | pull down |
| lrp  | nadE | pull down |
| lrp  | trxB | pull down |
| ltaE | nadE | pull down |
| luxS | lacZ | pull down |
| luxS | dnaK | pull down |
| luxS | ydbH | pull down |
| arrD | ompA | pull down |
| lysR | rfaJ | pull down |

|      |      |           |
|------|------|-----------|
| malt | groL | pull down |
| malt | dnaJ | pull down |
| malt | tufA | pull down |
| malt | fixB | pull down |
| malt | fliJ | pull down |
| malt | metK | pull down |
| malt | mreB | pull down |
| malt | pstB | pull down |
| malt | rho  | pull down |
| malt | rplS | pull down |

|      |      |           |
|------|------|-----------|
| manA | aas  | pull down |
| manA | bioC | pull down |
| manA | zwf  | pull down |
| manA | hybA | pull down |
| manA | prs  | pull down |
| manA | malZ | pull down |
| manA | minC | pull down |
| manA | mviN | pull down |
| manA | nadE | pull down |
| manA | quuQ | pull down |
| manA | rimN | pull down |
| manA | rplB | pull down |
| manA | rlmL | pull down |
| manA | gltX | pull down |
| manA | ushA | pull down |
| manA | ygaF | pull down |
| manA | yidK | pull down |
| manA | ykgF | pull down |
| manA | yqjG | pull down |

|      |      |           |
|------|------|-----------|
| aceB | mukB | pull down |
|------|------|-----------|

|      |      |                                                   |
|------|------|---------------------------------------------------|
| glcB | valS | comigration in non denaturing gel electrophoresis |
|------|------|---------------------------------------------------|

|      |      |           |
|------|------|-----------|
| mdaB | groL | pull down |
| mdaB | nrfA | pull down |

|      |      |                                                   |
|------|------|---------------------------------------------------|
| mdh  | rplC | pull down                                         |
| mdh  | rpsD | pull down                                         |
| mdh  | lysS | comigration in non denaturing gel electrophoresis |
| mdh  | leuS | comigration in non denaturing gel electrophoresis |
| mdh  | uxaC | comigration in non denaturing gel electrophoresis |
| mdtE | mdtE | blue native page                                  |
| mdtE | mdtE | blue native page                                  |
| menB | hldD | pull down                                         |
| menB | hldD | pull down                                         |
| menB | nadE | pull down                                         |
| menB | pepD | pull down                                         |
| menB | rpsN | pull down                                         |
| metE | allB | pull down                                         |
| metE | matC | pull down                                         |
| metE | serA | pull down                                         |
| metE | yncD | pull down                                         |
| metH | bgIX | pull down                                         |
| metH | dnaE | pull down                                         |
| metH | gltB | pull down                                         |
| metH | ilvC | pull down                                         |
| metK | groL | pull down                                         |
| metK | degQ | pull down                                         |
| metK | dnaJ | pull down                                         |
| metK | dnaJ | pull down                                         |
| metK | dnaK | pull down                                         |
| metK | tufA | pull down                                         |
| metK | tufA | pull down                                         |
| metK | fdnH | pull down                                         |
| metK | flgF | two hybrid array                                  |
| metK | fliI | two hybrid array                                  |
| metK | fliR | two hybrid array                                  |
| metK | fliT | two hybrid array                                  |
| metK | prs  | pull down                                         |
| metK | mreB | pull down                                         |
| metK | nadE | pull down                                         |
| metK | phnN | pull down                                         |
| metK | pstB | pull down                                         |
| metK | recA | pull down                                         |

|      |      |                  |
|------|------|------------------|
| metK | secA | pull down        |
| metK | speB | pull down        |
| metK | glyQ | pull down        |
| metK | tig  | two hybrid array |
| metK | ybfC | pull down        |
| metQ | dnaK | pull down        |
| mfd  | ihfA | pull down        |
| mfd  | nfrA | pull down        |
| mfd  | rplB | pull down        |
| mfd  | rpsM | pull down        |
| mfd  | stpA | pull down        |
| mfd  | tdcC | pull down        |
| mfd  | yeeT | pull down        |
| mfd  | yffB | pull down        |
| miaB | groL | pull down        |
| miaB | sdhA | pull down        |
| miaB | dnaJ | pull down        |
| miaB | dnaK | pull down        |
| miaB | tufA | pull down        |
| miaB | tufA | pull down        |
| miaB | kdsD | pull down        |
| miaB | prs  | pull down        |
| miaB | mreB | pull down        |
| miaB | pstB | pull down        |
| miaB | rplB | pull down        |
| miaB | rplD | pull down        |
| minC | nuoE | pull down        |
| minC | rplB | pull down        |
| minC | rplE | pull down        |
| minC | rpsB | pull down        |
| minC | rpsC | pull down        |
| minC | rpsD | pull down        |
| minC | slyD | pull down        |
| minC | smp  | pull down        |
| minC | yhjH | pull down        |
| minE | dps  | pull down        |
| minE | nadE | pull down        |
| minE | nuoE | pull down        |

|      |      |           |
|------|------|-----------|
| minE | nuoI | pull down |
| minE | rplE | pull down |
| minE | rplF | pull down |

|      |      |           |
|------|------|-----------|
| mIaC | dnaK | pull down |
| mIaC | rpsB | pull down |

|      |      |           |
|------|------|-----------|
| mmuM | dnaK | pull down |
| mmuM | nadE | pull down |

|      |      |           |
|------|------|-----------|
| mngB | groL | pull down |
| mngB | sdhA | pull down |
| mngB | fdnG | pull down |
| mngB | rpmB | pull down |

|      |       |           |
|------|-------|-----------|
| mngR | prs   | pull down |
| mngR | rpmB  | pull down |
| mngR | rpmF  | pull down |
| mngR | rmlA2 | pull down |

|      |      |           |
|------|------|-----------|
| mnmA | nadE | pull down |
| mnmA | rplB | pull down |

|      |      |           |
|------|------|-----------|
| moaA | groL | pull down |
| moaA | groL | pull down |
| moaA | groL | pull down |
| moaA | cheA | pull down |
| moaA | tufA | pull down |
| moaA | gyrB | pull down |
| moaA | nadE | pull down |
| moaA | ribB | pull down |
| moaA | rplU | pull down |
| moaA | rpsG | pull down |
| moaA | smpB | pull down |
| moaA | yahN | pull down |
| moaA | ydcP | pull down |

|      |      |           |
|------|------|-----------|
| moaB | rpmB | pull down |
| moaB | ymfM | pull down |

|      |      |                                   |
|------|------|-----------------------------------|
| moeA | argG | pull down                         |
| moeA | pfkA | pull down                         |
| moeA | matC | pull down                         |
| moeA | mobA | adenylate cyclase complementation |
| moeA | mobA | adenylate cyclase complementation |
| moeA | mobA | adenylate cyclase complementation |
| moeA | moeA | adenylate cyclase complementation |
| moeA | mog  | adenylate cyclase complementation |
| moeA | nadE | pull down                         |
| yehH | groL | pull down                         |
| mpl  | rarA | pull down                         |
| mprA | lacZ | pull down                         |
| mprA | fusA | pull down                         |
| mprA | glgB | pull down                         |
| mprA | hofH | pull down                         |
| mprA | hchA | pull down                         |
| mprA | narZ | pull down                         |
| mprA | nuoG | pull down                         |
| mprA | perR | pull down                         |
| mprA | alaS | pull down                         |
| mprA | yedZ | pull down                         |
| mraZ | groL | pull down                         |
| mraZ | flgF | two hybrid array                  |
| mraZ | fliA | two hybrid array                  |
| mraZ | prs  | pull down                         |
| mraZ | mraZ | two hybrid array                  |
| mreB | accA | pull down                         |
| mreB | add  | pull down                         |
| mreB | atpD | pull down                         |
| mreB | groL | pull down                         |
| mreB | groL | pull down                         |
| mreB | clpB | pull down                         |
| mreB | dnaJ | pull down                         |
| mreB | dnaJ | pull down                         |
| mreB | dnaK | pull down                         |
| mreB | dnaK | pull down                         |
| mreB | fusA | pull down                         |

|      |      |           |
|------|------|-----------|
| mreB | tufA | pull down |
| mreB | tufA | pull down |
| mreB | gatY | pull down |
| mreB | gyrA | pull down |
| mreB | ibpA | pull down |
| mreB | kefC | pull down |
| mreB | malK | pull down |
| mreB | malT | pull down |
| mreB | miaB | pull down |
| mreB | minD | pull down |
| mreB | narG | pull down |
| mreB | nuoC | pull down |
| mreB | nusG | pull down |
| mreB | ompA | pull down |
| mreB | ompC | pull down |
| mreB | pnp  | pull down |
| mreB | pstB | pull down |
| mreB | gatB | pull down |
| mreB | radA | pull down |
| mreB | recA | pull down |
| mreB | rho  | pull down |
| mreB | rplC | pull down |
| mreB | rplE | pull down |
| mreB | rpoB | pull down |
| mreB | rpoC | pull down |
| mreB | rpsF | pull down |
| mreB | secA | pull down |
| mreB | secA | pull down |
| mreB | glyQ | pull down |
| mreB | lysU | pull down |
| mreB | uspG | pull down |
| mreB | ybeD | pull down |
| mreB | ydiH | pull down |
| mreB | yjgD | pull down |

|     |      |           |
|-----|------|-----------|
| mrp | fdnH | pull down |
| mrp | fur  | pull down |
| mrp | nadE | pull down |
| mrp | rhsE | pull down |
| mrp | yghW | pull down |



|      |      |                  |
|------|------|------------------|
| msbB | acnB | pull down        |
| msbB | ahpF | pull down        |
| msbB | groL | pull down        |
| msbB | clpB | pull down        |
| msbB | fusA | pull down        |
| msbB | recB | pull down        |
| msbB | fliY | pull down        |
| msbB | zwf  | pull down        |
| msbB | glnD | pull down        |
| msbB | glpD | pull down        |
| msbB | gyrA | pull down        |
| msbB | htrB | pull down        |
| msbB | nuoG | pull down        |
| msbB | aceE | pull down        |
| msbB | relE | pull down        |
| msbB | rpsM | pull down        |
| msbB | alaS | pull down        |
| msbB | topA | pull down        |
| msbB | xisE | pull down        |
| msbB | ymfM | pull down        |
| mscS | yiaF | blue native page |
| msrA | lrp  | pull down        |
| mtlD | dppA | pull down        |
| mtlD | entB | pull down        |
| mtlD | ybbP | pull down        |
| mtlD | yncl | pull down        |
| mtnN | dnaK | pull down        |
| mtnN | gatZ | pull down        |
| mtnN | glgC | pull down        |
| mtnN | glpC | pull down        |
| mtnN | yraN | pull down        |
| solA | envZ | pull down        |
| solA | nrfA | pull down        |
| solA | purC | pull down        |
| solA | rplB | pull down        |
| solA | rmuC | pull down        |
| solA | leuS | pull down        |
| solA | yibA | pull down        |
| solA | yjdA | pull down        |

|      |      |                                   |
|------|------|-----------------------------------|
| mukE | prs  | pull down                         |
| mukE | mukB | pull down                         |
| mukE | mukB | pull down                         |
| mukE | mukF | pull down                         |
| mukE | mukF | pull down                         |
| mukE | mukF | protein array                     |
| mukE | mukF | x-ray crystallography             |
| mukE | rplB | pull down                         |
| mukE | rpsI | pull down                         |
| mukE | tatE | pull down                         |
| mukE | ytfN | pull down                         |
|      |      |                                   |
| murA | degQ | pull down                         |
| murA | tufA | pull down                         |
| murA | ftsI | pull down                         |
| murA | glnE | pull down                         |
| murA | matC | pull down                         |
| murA | nadE | pull down                         |
| murA | pepB | pull down                         |
| murA | prsA | pull down                         |
| murA | rapA | pull down                         |
| murA | rplK | pull down                         |
| murA | rplM | pull down                         |
| murA | rplV | pull down                         |
| murA | rplD | pull down                         |
| murA | rplL | pull down                         |
| murA | rpsJ | pull down                         |
| murA | rpsB | pull down                         |
| murA | umuC | pull down                         |
| murA | uvrA | pull down                         |
| murA | wzc  | pull down                         |
| murA | yhgF | pull down                         |
|      |      |                                   |
| mutS | baeS | pull down                         |
| mutS | tufA | pull down                         |
| mutS | envZ | pull down                         |
| mutS | galF | pull down                         |
| mutS | mutS | adenylate cyclase complementation |
|      |      |                                   |
| nadE | arnA | pull down                         |
| nadE | ygfH | pull down                         |
| nadE | yhcA | pull down                         |

|      |      |           |
|------|------|-----------|
| nagC | groL | pull down |
| nagC | nagB | pull down |
| nagC | rpmB | pull down |
| nagC | rsuA | pull down |
| nagC | tatE | pull down |

|      |      |           |
|------|------|-----------|
| nanA | gadX | pull down |
| nanA | nadE | pull down |
| nanA | smtA | pull down |

|      |      |                       |
|------|------|-----------------------|
| narG | dnaJ | pull down             |
| narG | tufA | pull down             |
| narG | hldD | pull down             |
| narG | mreB | pull down             |
| narG | narH | x-ray crystallography |
| narG | narI | x-ray crystallography |
| narG | narJ | pull down             |
| narG | narJ | pull down             |
| narG | narY | pull down             |
| narG | recA | pull down             |
| narG | rpsD | pull down             |

|      |      |                  |
|------|------|------------------|
| narH | tufA | pull down        |
| narH | fadH | pull down        |
| narH | nadE | pull down        |
| narH | narG | blue native page |
| narH | narG | pull down        |
| narH | narG | pull down        |
| narH | narZ | blue native page |
| narH | ugpB | pull down        |

|      |      |           |
|------|------|-----------|
| narJ | pepP | pull down |
| narJ | sdhA | pull down |
| narJ | lpdA | pull down |
| narJ | narG | pull down |
| narJ | narG | pull down |
| narJ | narH | pull down |
| narJ | narH | pull down |
| narJ | narY | pull down |
| narJ | aceF | pull down |
| narJ | ompA | pull down |
| narJ | rplL | pull down |
| narJ | yeaY | pull down |

|      |      |           |
|------|------|-----------|
| narL | yicI | pull down |
|------|------|-----------|

|      |      |           |
|------|------|-----------|
| narP | hchA | pull down |
| narP | napG | pull down |

|      |      |           |
|------|------|-----------|
| nfsA | dnaK | pull down |
|------|------|-----------|

|      |      |           |
|------|------|-----------|
| nfuA | acnB | pull down |
| nfuA | citD | pull down |
| nfuA | mrp  | pull down |
| nfuA | nadE | pull down |
| nfuA | nagZ | pull down |
| nfuA | nuoG | pull down |
| nfuA | nusG | pull down |
| nfuA | rplJ | pull down |
| nfuA | rplN | pull down |
| nfuA | rplC | pull down |
| nfuA | rpsD | pull down |
| nfuA | thiF | pull down |

|      |      |           |
|------|------|-----------|
| nhaR | groL | pull down |
|------|------|-----------|

|      |      |                  |
|------|------|------------------|
| ydbK | flgH | two hybrid array |
| ydbK | flgJ | two hybrid array |
| ydbK | flhD | two hybrid array |
| ydbK | flhE | two hybrid array |
| ydbK | ydbK | two hybrid array |
| ydbK | topA | two hybrid array |
| ydbK | yjeK | two hybrid array |

|      |      |                  |
|------|------|------------------|
| nsrR | prs  | pull down        |
| glnG | glnG | two hybrid       |
| nudB | arsR | pull down        |
| nudB | lpdA | pull down        |
| nudB | dnaK | pull down        |
| nudB | nadE | pull down        |
| nudB | aceE | pull down        |
| nudB | rplN | pull down        |
| nudB | uspG | pull down        |
| nudK | acnB | pull down        |
| nudK | ahpC | pull down        |
| nudK | eutQ | pull down        |
| nudK | narL | pull down        |
| nudK | aceE | pull down        |
| nudK | pta  | pull down        |
| nudK | rplF | pull down        |
| nudK | uvrC | pull down        |
| nuoC | nuoB | blue native page |
| nuoC | nuoG | blue native page |
| nuoF | groL | pull down        |
| nuoF | fadB | pull down        |
| nuoF | nuoE | pull down        |
| nuoF | nuoG | pull down        |
| nuoF | uvrB | pull down        |
| nusA | argG | pull down        |
| nusA | cybC | pull down        |
| nusA | tufA | pull down        |
| nusA | fur  | pull down        |
| nusA | infB | pull down        |
| nusA | infB | pull down        |
| nusA | infB | pull down        |

|      |      |           |
|------|------|-----------|
| nusA | metJ | pull down |
| nusA | aceE | pull down |
| nusA | prsA | pull down |
| nusA | pstS | pull down |
| nusA | rhsD | pull down |
| nusA | rplA | pull down |
| nusA | rplO | pull down |
| nusA | rplO | pull down |
| nusA | rplP | pull down |
| nusA | rplS | pull down |
| nusA | rplS | pull down |
| nusA | rplB | pull down |
| nusA | rplB | pull down |
| nusA | rplV | pull down |
| nusA | rplV | pull down |
| nusA | rplX | pull down |
| nusA | rplC | pull down |
| nusA | rplD | pull down |
| nusA | rplE | pull down |
| nusA | rplF | pull down |
| nusA | rpoH | pull down |
| nusA | rpoA | pull down |
| nusA | rpoA | pull down |
| nusA | rpoB | pull down |
| nusA | rpoB | pull down |
| nusA | rpoB | pull down |
| nusA | rpoC | pull down |
| nusA | rpoC | pull down |
| nusA | rpoC | pull down |
| nusA | rpoD | pull down |
| nusA | rpoZ | pull down |
| nusA | rpsC | pull down |
| nusA | rpsC | pull down |
| nusA | rpsD | pull down |
| nusA | rpsD | pull down |
| nusA | rpsE | pull down |
| nusA | rpsE | pull down |
| nusA | rpsG | pull down |
| nusA | rpsG | pull down |
| nusA | rpsI | pull down |
| nusA | uspA | pull down |
| nusA | uvrA | pull down |
| nusA | ycgL | pull down |
| nusB | fhuA | pull down |

|      |      |           |
|------|------|-----------|
| nusB | malZ | pull down |
| nusB | nadE | pull down |
| nusB | rplM | pull down |
| nusB | rplC | pull down |
| nusB | rpsJ | pull down |
| nusB | rpsJ | pull down |
| nusB | rpsB | pull down |
| nusB | rpsD | pull down |
| nusB | rpsE | pull down |
| nusB | secD | pull down |
| nusB | slt  | pull down |
| nusB | yfaQ | pull down |

|      |      |           |
|------|------|-----------|
| sucA | lpdA | pull down |
| sucA | lpdA | pull down |
| sucA | hflK | pull down |
| sucA | lipA | pull down |
| sucA | oxc  | pull down |

|      |      |           |
|------|------|-----------|
| sucB | dcyD | pull down |
| sucB | lpdA | pull down |
| sucB | ftsZ | pull down |
| sucB | fur  | pull down |
| sucB | lipA | pull down |
| sucB | mreB | pull down |
| sucB | pqiA | pull down |
| sucB | rtcB | pull down |
| sucB | ybaY | pull down |
| sucB | ycgL | pull down |
| sucB | yciH | pull down |

|      |      |           |
|------|------|-----------|
| aceF | dcm  | pull down |
| aceF | sdhA | pull down |
| aceF | lpdA | pull down |
| aceF | mukB | pull down |

|      |      |                  |
|------|------|------------------|
| ompA | ompA | blue native page |
| ompA | tig  | pull down        |

|      |      |           |
|------|------|-----------|
| ompR | cbl  | pull down |
| ompR | envZ | pull down |

|      |      |           |
|------|------|-----------|
| ompR | prs  | pull down |
| ompR | nagZ | pull down |

|      |      |           |
|------|------|-----------|
| prlC | bcsZ | pull down |
| prlC | yjhR | pull down |

|      |      |           |
|------|------|-----------|
| mdoG | rpsC | pull down |
| mdoG | rpsI | pull down |
| mdoG | trxB | pull down |
| mdoG | ytfN | pull down |

|      |      |           |
|------|------|-----------|
| osmC | lacZ | pull down |
| osmC | fdoG | pull down |
| osmC | malE | pull down |
| osmC | mngB | pull down |
| osmC | ptrA | pull down |
| osmC | torR | pull down |
| osmC | yebS | pull down |
| osmC | yjeH | pull down |
| osmC | yjiG | pull down |

|      |      |           |
|------|------|-----------|
| osmF | nadE | pull down |
| osmF | rplD | pull down |

|      |      |           |
|------|------|-----------|
| panC | lacZ | pull down |
| panC | carB | pull down |
| panC | dnaK | pull down |
| panC | panB | pull down |
| panC | purC | pull down |
| panC | slyD | pull down |
| panC | ushA | pull down |
| panC | ushA | pull down |

|      |      |           |
|------|------|-----------|
| parC | lpdA | pull down |
| parC | gyrA | pull down |



|      |      |                                   |
|------|------|-----------------------------------|
| parC | mreB | pull down                         |
| parC | murF | pull down                         |
| parC | aceF | pull down                         |
| parC | pflD | pull down                         |
| parC | rfaQ | pull down                         |
| parC | rplA | pull down                         |
| parC | rplM | pull down                         |
| parC | rplB | pull down                         |
| parC | rplV | pull down                         |
| parC | rpmA | pull down                         |
| parC | rpmG | pull down                         |
| parC | rplL | pull down                         |
| parC | rpsJ | pull down                         |
| parC | rpsB | pull down                         |
| parC | secA | pull down                         |
| parC | slyD | pull down                         |
| parC | yciH | pull down                         |
| -    | amiC | pull down                         |
| -    | ftsI | pull down                         |
| mrcB | ftsN | surface plasmon resonance         |
| mrcB | ftsN | adenylate cyclase complementation |
| mrcB | ftsN | cross-linking study               |
| -    | mipA | pull down                         |
| -    | mrcA | pull down                         |
| -    | -    | pull down                         |
| pckA | lacZ | pull down                         |
| pckA | metR | pull down                         |
| pckA | yebT | pull down                         |
| pdhR | groL | pull down                         |
| pdhR | lpdA | pull down                         |
| pdhR | aceE | pull down                         |
| pdhR | aceF | pull down                         |
| pdhR | rpmB | pull down                         |
| pdhR | tatE | pull down                         |
| pdxK | dnaK | pull down                         |
| pdxK | rplQ | pull down                         |

|      |      |                                                   |
|------|------|---------------------------------------------------|
| pdxY | glnA | pull down                                         |
| pdxY | uidC | pull down                                         |
| pepB | fabH | pull down                                         |
| pepB | helD | pull down                                         |
| pepB | ompA | pull down                                         |
| pepD | pepP | pull down                                         |
| pepD | pepP | pull down                                         |
| pepD | dnaK | pull down                                         |
| pepD | greB | pull down                                         |
| pepD | guaC | pull down                                         |
| pepD | purL | comigration in non denaturing gel electrophoresis |
| pepD | wbbJ | pull down                                         |
| pepQ | fdoG | pull down                                         |
| pepQ | kdpD | pull down                                         |
| pepT | dps  | pull down                                         |
| pepT | fusA | pull down                                         |
| pepT | tufA | pull down                                         |
| pepT | glnB | pull down                                         |
| pepT | hns  | pull down                                         |
| pepT | nadE | pull down                                         |
| pepT | pepE | pull down                                         |
| pepT | pflB | pull down                                         |
| pepT | pflB | pull down                                         |
| pepT | pflB | pull down                                         |
| pepT | proA | pull down                                         |
| pepT | rhsD | pull down                                         |
| pepT | rpLO | pull down                                         |
| pepT | tpiA | pull down                                         |
| pepT | wcaL | pull down                                         |
| pepT | ygaC | pull down                                         |
| pepT | yihI | pull down                                         |
| pflA | matC | pull down                                         |
| pflA | nadE | pull down                                         |
| pflB | fhuA | pull down                                         |
| pflB | fixB | pull down                                         |
| pflB | zwf  | pull down                                         |
| pflB | grcA | pull down                                         |
| pflB | grcA | pull down                                         |
| pflB | pykA | pull down                                         |

|      |      |                                                   |
|------|------|---------------------------------------------------|
| pflB | matC | pull down                                         |
| pflB | nadE | pull down                                         |
| pflB | tnaA | comigration in non denaturing gel electrophoresis |
| pflB | tpiA | pull down                                         |
| pflB | tpiA | pull down                                         |
| pflB | ydfK | pull down                                         |

|     |      |           |
|-----|------|-----------|
| pgk | dnaK | pull down |
| pgk | eno  | pull down |
| pgk | hfq  | pull down |
| pgk | pnp  | pull down |
| pgk | rplI | pull down |
| pgk | rne  | pull down |
| pgk | rpsN | pull down |
| pgk | rpsT | pull down |
| pgk | rpsF | pull down |

|     |      |           |
|-----|------|-----------|
| pgm | nadE | pull down |
|-----|------|-----------|

|      |      |           |
|------|------|-----------|
| phnB | ymfM | pull down |
|------|------|-----------|

|      |      |           |
|------|------|-----------|
| ybeZ | cusB | pull down |
| ybeZ | cyaA | pull down |
| ybeZ | hupA | pull down |
| ybeZ | deaD | pull down |
| ybeZ | lpdA | pull down |
| ybeZ | lpdA | pull down |
| ybeZ | fabZ | pull down |
| ybeZ | fur  | pull down |
| ybeZ | malT | pull down |
| ybeZ | norV | pull down |
| ybeZ | aceE | pull down |
| ybeZ | aceF | pull down |
| ybeZ | aceF | pull down |
| ybeZ | pssA | pull down |
| ybeZ | ycfB | pull down |
| ybeZ | rplA | pull down |
| ybeZ | rplA | pull down |
| ybeZ | rplJ | pull down |
| ybeZ | rplM | pull down |
| ybeZ | rplM | pull down |

|      |      |           |
|------|------|-----------|
| ybeZ | rplO | pull down |
| ybeZ | rplP | pull down |
| ybeZ | rplS | pull down |
| ybeZ | rplS | pull down |
| ybeZ | rplB | pull down |
| ybeZ | rplT | pull down |
| ybeZ | rplU | pull down |
| ybeZ | rplV | pull down |
| ybeZ | rplV | pull down |
| ybeZ | rplX | pull down |
| ybeZ | rplX | pull down |
| ybeZ | rplY | pull down |
| ybeZ | rpmB | pull down |
| ybeZ | rplC | pull down |
| ybeZ | rplC | pull down |
| ybeZ | rpmG | pull down |
| ybeZ | rplD | pull down |
| ybeZ | rplD | pull down |
| ybeZ | rplE | pull down |
| ybeZ | rplE | pull down |
| ybeZ | rplF | pull down |
| ybeZ | rplF | pull down |
| ybeZ | rplL | pull down |
| ybeZ | rplI | pull down |
| ybeZ | rplI | pull down |
| ybeZ | rlmL | pull down |
| ybeZ | rluB | pull down |
| ybeZ | rnr  | pull down |
| ybeZ | rpsA | pull down |
| ybeZ | rpsM | pull down |
| ybeZ | rpsN | pull down |
| ybeZ | rpsP | pull down |
| ybeZ | rpsB | pull down |
| ybeZ | rpsB | pull down |
| ybeZ | rpsT | pull down |
| ybeZ | rpsC | pull down |
| ybeZ | rpsD | pull down |
| ybeZ | rpsE | pull down |
| ybeZ | rpsE | pull down |
| ybeZ | rpsG | pull down |
| ybeZ | rpsG | pull down |
| ybeZ | secA | pull down |
| ybeZ | uvrD | pull down |
| ybeZ | ybcJ | pull down |
| ybeZ | yfcB | pull down |

|      |      |           |
|------|------|-----------|
| ybeZ | yfiF | pull down |
| ybeZ | yhbY | pull down |
| phoP | ftsH | pull down |
| phoP | nadE | pull down |
| phoP | rplF | pull down |
| phoP | yiiX | pull down |
| malP | hupA | pull down |
| malP | lpdA | pull down |
| malP | lpdA | pull down |
| malP | aceF | pull down |
| malP | aceF | pull down |
| malP | pnp  | pull down |
| malP | rplA | pull down |
| malP | rplM | pull down |
| malP | rplS | pull down |
| malP | rplU | pull down |
| malP | rplV | pull down |
| malP | rplC | pull down |
| malP | rplC | pull down |
| malP | rplD | pull down |
| malP | rplI | pull down |
| malP | yhbY | pull down |
| hyuA | ydcW | pull down |
| hyuA | groL | pull down |
| pmbA | groL | pull down |
| pmbA | idnR | pull down |
| pmbA | argI | pull down |
| pmbA | argF | pull down |
| pmbA | yjiR | pull down |
| pmrD | otsB | pull down |
| pmrD | pepD | pull down |
| pmrD | rplQ | pull down |
| pmrD | rplB | pull down |
| pmrD | rpsS | pull down |
| pmrD | rpsI | pull down |
| pmrD | yahO | pull down |
| pmrD | yedN | pull down |
| pnp  | hupA | pull down |
| pnp  | eno  | pull down |

|     |      |                                        |
|-----|------|----------------------------------------|
| pnp | eno  | pull down                              |
| pnp | metK | pull down                              |
| pnp | mreB | pull down                              |
| pnp | pgk  | pull down                              |
| pnp | recA | pull down                              |
| pnp | rhIB | pull down                              |
| pnp | rhIB | pull down                              |
| pnp | rplA | pull down                              |
| pnp | rplM | pull down                              |
| pnp | rplM | pull down                              |
| pnp | rplO | pull down                              |
| pnp | rplQ | pull down                              |
| pnp | rplB | pull down                              |
| pnp | rplU | pull down                              |
| pnp | rplV | pull down                              |
| pnp | rplX | pull down                              |
| pnp | rplD | pull down                              |
| pnp | rplD | pull down                              |
| pnp | rplE | pull down                              |
| pnp | rplF | pull down                              |
| pnp | rplI | pull down                              |
| pnp | rplI | pull down                              |
| pnp | rluB | pull down                              |
| pnp | rne  | pull down                              |
| pnp | rne  | pull down                              |
| pnp | rne  | mass spectrometry studies of complexes |
| pnp | rpoA | pull down                              |
| pnp | rpsM | pull down                              |
| pnp | rpsM | pull down                              |
| pnp | rpsO | pull down                              |
| pnp | rpsR | pull down                              |
| pnp | rpsS | pull down                              |
| pnp | rpsT | pull down                              |
| pnp | rpsC | pull down                              |
| pnp | rpsD | pull down                              |
| pnp | rpsE | pull down                              |
| pnp | rpsE | pull down                              |
| pnp | rpsG | pull down                              |
| pnp | rpsG | pull down                              |
| pnp | srmB | pull down                              |

|      |      |           |
|------|------|-----------|
| ppiB | accC | pull down |
| ppiB | lacZ | pull down |
| ppiB | clpX | pull down |
| ppiB | dadA | pull down |
| ppiB | dnaK | pull down |
| ppiB | ftsH | pull down |
| ppiB | fucK | pull down |
| ppiB | glpD | pull down |
| ppiB | hflK | pull down |
| ppiB | mukB | pull down |
| ppiB | pflB | pull down |
| ppiB | pta  | pull down |
| ppiB | putA | pull down |
| ppiB | rhcC | pull down |
| ppiB | rplN | pull down |
| ppiB | rpoB | pull down |
| ppiB | rumB | pull down |
| ppiB | ydcS | pull down |
| ppiB | yfbU | pull down |
| ppiB | yhjU | pull down |
| ppiB | yifE | pull down |

|     |      |           |
|-----|------|-----------|
| ppk | cybC | pull down |
| ppk | groL | pull down |
| ppk | sdhA | pull down |
| ppk | lpdA | pull down |
| ppk | aceF | pull down |
| ppk | yghW | pull down |
| ppk | yibL | pull down |

|      |      |           |
|------|------|-----------|
| ppsA | rplB | pull down |
|------|------|-----------|

|      |      |           |
|------|------|-----------|
| priC | rplA | pull down |
| priC | rplB | pull down |
| priC | rplC | pull down |
| priC | rplF | pull down |
| priC | rpsA | pull down |
| priC | rpsD | pull down |
| priC | rpsG | pull down |
| priC | metG | pull down |
| priC | ytfM | pull down |

|      |      |           |
|------|------|-----------|
| prpD | groL | pull down |
|------|------|-----------|

|      |      |                  |
|------|------|------------------|
| prpD | nadE | pull down        |
| pspF | mqo  | pull down        |
| pspF | php  | pull down        |
| pssA | pnp  | pull down        |
| pssA | ppiD | pull down        |
| pssA | ppx  | pull down        |
| pssA | rplA | pull down        |
| pssA | rplQ | pull down        |
| pssA | rplB | pull down        |
| pssA | rplU | pull down        |
| pssA | rplW | pull down        |
| pssA | rplC | pull down        |
| pssA | rplL | pull down        |
| pssA | rlmL | pull down        |
| pssA | rpsA | pull down        |
| pssA | rpsM | pull down        |
| pssA | rpsN | pull down        |
| pssA | rpsB | pull down        |
| pssA | rpsU | pull down        |
| pssA | rpsC | pull down        |
| pssA | rpsD | pull down        |
| pssA | rpsD | pull down        |
| pssA | rpsE | pull down        |
| pssA | rpsG | pull down        |
| pssA | yfiF | pull down        |
| pssA | yghW | pull down        |
| ptsI | dnaJ | pull down        |
| ptsI | entC | pull down        |
| ptsI | ftsY | pull down        |
| ptsI | nadE | pull down        |
| ptsI | purR | pull down        |
| pta  | argG | pull down        |
| pta  | chpS | pull down        |
| pta  | dnaJ | pull down        |
| pta  | tufA | pull down        |
| pta  | glmU | blue native page |
| pta  | nadE | pull down        |
| pta  | napC | pull down        |
| pta  | nrdI | pull down        |
| pta  | nuoE | pull down        |
| pta  | putA | pull down        |



|      |      |                            |
|------|------|----------------------------|
| pta  | queD | pull down                  |
| pta  | rhcC | pull down                  |
| pta  | rplF | pull down                  |
| pta  | tig  | pull down                  |
| pta  | yddB | pull down                  |
| pta  | yneK | pull down                  |
|      |      |                            |
| crr  | ptsG | nuclear magnetic resonance |
| crr  | ptsH | nuclear magnetic resonance |
|      |      |                            |
| srIB | arnA | pull down                  |
| srIB | gsp  | pull down                  |
| srIB | ydcP | pull down                  |
|      |      |                            |
| ptsH | ptsl | nuclear magnetic resonance |
|      |      |                            |
| gatB | cca  | pull down                  |
| gatB | tufA | pull down                  |
| gatB | ynbC | pull down                  |
|      |      |                            |
| manX | cytR | pull down                  |
| manX | pgk  | pull down                  |
| manX | manY | blue native page           |
| manX | manZ | blue native page           |
| manX | recG | pull down                  |
| manX | rplV | pull down                  |
| manX | rpmB | pull down                  |
| manX | yafC | pull down                  |
|      |      |                            |
| ptsN | hybE | pull down                  |
|      |      |                            |
| purC | cca  | pull down                  |
| purC | dnaK | pull down                  |
| purC | dnaK | pull down                  |
| purC | evgA | pull down                  |
| purC | guaC | pull down                  |
| purC | lhr  | pull down                  |

|      |      |           |
|------|------|-----------|
| purC | tig  | pull down |
| purC | tig  | pull down |
| purC | yidZ | pull down |

|      |      |           |
|------|------|-----------|
| purA | rspA | pull down |
|------|------|-----------|

|      |      |           |
|------|------|-----------|
| putA | groL | pull down |
| putA | dnaK | pull down |
| putA | eutM | pull down |
| putA | mukF | pull down |
| putA | ydaC | pull down |
| putA | yfaS | pull down |
| putA | yheS | pull down |

|      |      |           |
|------|------|-----------|
| pyrG | hchA | pull down |
| pyrG | nadE | pull down |
| pyrG | rpoB | pull down |
| pyrG | rpoC | pull down |
| pyrG | hsdR | pull down |
| pyrG | ybfF | pull down |

|      |      |           |
|------|------|-----------|
| qorA | dnaK | pull down |
| qorA | rdgC | pull down |

|      |      |           |
|------|------|-----------|
| queC | aidB | pull down |
| queC | lacZ | pull down |
| queC | dnaK | pull down |
| queC | dnaK | pull down |
| queC | tufA | pull down |
| queC | tufA | pull down |
| queC | glpD | pull down |
| queC | grcA | pull down |
| queC | iscS | pull down |
| queC | mukB | pull down |
| queC | napD | pull down |
| queC | narZ | pull down |
| queC | rplL | pull down |
| queC | rpsJ | pull down |
| queC | spoT | pull down |
| queC | yegT | pull down |

|      |      |           |
|------|------|-----------|
| rapA | fhiA | pull down |
| rapA | nusA | pull down |
| rapA | rplC | pull down |
| rapA | rpoA | pull down |
| rapA | rpoB | pull down |
| rapA | rpoC | pull down |
| rapA | rpoC | pull down |
| rapA | rpsE | pull down |
| rapA | yfaS | pull down |
| rapA | yfcU | pull down |
| rbfA | nadE | pull down |
|      |      |           |
| rbsB | dnaK | pull down |
| rbsB | livF | pull down |
| rbsB | nadE | pull down |
| rbsB | phnF | pull down |
| rbsB | rplD | pull down |
|      |      |           |
| rbsK | ompR | pull down |
|      |      |           |
| rcsB | mgtA | pull down |
| rcsB | yfaY | pull down |
| rcsB | crp  | pull down |
| rcsB | dnaK | pull down |
| rcsB | polA | pull down |
| rcsB | tufA | pull down |
| rcsB | etk  | pull down |
| rcsB | gadE | pull down |
| rcsB | gfcD | pull down |
| rcsB | glnB | pull down |
| rcsB | lldP | pull down |
| rcsB | prmA | pull down |
| rcsB | rcsD | pull down |
| rcsB | rhmD | pull down |
| rcsB | rplM | pull down |
| rcsB | rplM | pull down |
| rcsB | rplS | pull down |
| rcsB | rplV | pull down |
| rcsB | rpmB | pull down |
| rcsB | rplC | pull down |
| rcsB | rplE | pull down |

|      |      |           |
|------|------|-----------|
| rcsB | rplI | pull down |
| rcsB | rpoA | pull down |
| rcsB | rpsJ | pull down |
| rcsB | rpsU | pull down |
| rcsB | rpsC | pull down |
| rcsB | rpsC | pull down |
| rcsB | rpsD | pull down |
| rcsB | ssuD | pull down |
| rcsB | tilS | pull down |
| rcsB | yagA | pull down |
| rcsB | yeaO | pull down |
| rcsB | ygfK | pull down |
| rcsB | yhjQ | pull down |

|      |      |           |
|------|------|-----------|
| rdgB | nusG | pull down |
| rdgB | pepB | pull down |
| rdgB | visC | pull down |

|      |     |           |
|------|-----|-----------|
| rdgC | prs | pull down |
|------|-----|-----------|

|      |      |           |
|------|------|-----------|
| recA | nadE | pull down |
| recA | napC | pull down |
| recA | rplJ | pull down |
| recA | rplB | pull down |
| recA | yfiR | pull down |

|      |      |           |
|------|------|-----------|
| relA | acnB | pull down |
| relA | adhE | pull down |
| relA | ais  | pull down |
| relA | speG | pull down |
| relA | ftnB | pull down |
| relA | yehH | pull down |
| relA | aceE | pull down |
| relA | rplS | pull down |
| relA | rplB | pull down |
| relA | rplD | pull down |
| relA | rpsM | pull down |
| relA | slyD | pull down |
| relA | sxy  | pull down |

|      |      |           |
|------|------|-----------|
| prfB | ccmB | pull down |
|------|------|-----------|

|      |      |           |
|------|------|-----------|
| prfB | hupA | pull down |
| prfB | hupB | pull down |
| prfB | gcp  | pull down |
| prfB | nagK | pull down |
| prfB | parE | pull down |
| prfB | rpoA | pull down |
| prfB | ulaA | pull down |
| prfB | wecA | pull down |
| prfB | yeiT | pull down |
| prfB | yjcF | pull down |
| prfB | ynfE | pull down |

|      |      |           |
|------|------|-----------|
| prfC | gyrB | pull down |
| prfC | smpB | pull down |
| prfC | tgt  | pull down |

|      |      |           |
|------|------|-----------|
| rfaB | rplB | pull down |
|------|------|-----------|

|      |      |           |
|------|------|-----------|
| rfaF | kdpB | pull down |
| rfaF | groL | pull down |
| rfaF | htpG | pull down |
| rfaF | rplA | pull down |
| rfaF | rplQ | pull down |
| rfaF | rplB | pull down |
| rfaF | rpsC | pull down |
| rfaF | rpsD | pull down |
| rfaF | rpsG | pull down |
| rfaF | uspG | pull down |

|      |      |           |
|------|------|-----------|
| rfaG | groL | pull down |
| rfaG | gltJ | pull down |
| rfaG | rplB | pull down |
| rfaG | rpsC | pull down |
| rfaG | ycgE | pull down |
| rfaG | yeaY | pull down |

|      |      |           |
|------|------|-----------|
| rfaP | groL | pull down |
| rfaP | clpB | pull down |
| rfaP | mutM | pull down |
| rfaP | rplB | pull down |
| rfaP | glyS | pull down |

|      |      |           |
|------|------|-----------|
| rhIB | dacA | pull down |
|------|------|-----------|

|      |      |                                        |
|------|------|----------------------------------------|
| rhIB | dnaK | pull down                              |
| rhIB | tufA | pull down                              |
| rhIB | eno  | pull down                              |
| rhIB | eno  | pull down                              |
| rhIB | nfrA | pull down                              |
| rhIB | aceE | pull down                              |
| rhIB | pnp  | pull down                              |
| rhIB | pnp  | pull down                              |
| rhIB | rplA | pull down                              |
| rhIB | rplK | pull down                              |
| rhIB | rplM | pull down                              |
| rhIB | rplS | pull down                              |
| rhIB | rplU | pull down                              |
| rhIB | rplV | pull down                              |
| rhIB | rplV | pull down                              |
| rhIB | rpmB | pull down                              |
| rhIB | rplC | pull down                              |
| rhIB | rplC | pull down                              |
| rhIB | rplI | pull down                              |
| rhIB | rne  | pull down                              |
| rhIB | rne  | pull down                              |
| rhIB | rne  | cross-linking study                    |
| rhIB | rne  | molecular sieving                      |
| rhIB | rne  | mass spectrometry studies of complexes |
| rhIB | rpsJ | pull down                              |
| rhIB | rpsP | pull down                              |
| rhIB | rpsS | pull down                              |
| rhIB | rpsT | pull down                              |
| rhIB | rpsC | pull down                              |
| rhIB | rpsD | pull down                              |
| rhIB | rpsE | pull down                              |
| rhIB | rpsF | pull down                              |
| rhIB | rpsG | pull down                              |
| rhIB | rpsG | pull down                              |
| rhIE | emrA | pull down                              |
| rhIE | nadE | pull down                              |
| rhIE | nfnB | pull down                              |
| rhIE | pdxH | pull down                              |
| rhIE | rplA | pull down                              |
| rhIE | rplB | pull down                              |
| rhIE | rpmB | pull down                              |
| rhIE | rplC | pull down                              |
| rhIE | rplD | pull down                              |
| rhIE | rpoB | pull down                              |

|      |      |           |
|------|------|-----------|
| rhIE | rpoC | pull down |
| rhIE | rpsA | pull down |
| rhIE | rpsJ | pull down |
| rhIE | rpsR | pull down |
| rhIE | rpsD | pull down |
| rhIE | rpsG | pull down |
| rhIE | rpsI | pull down |
| rhIE | yafO | pull down |
| rhIE | ycgL | pull down |
| rhIE | yciH | pull down |
| rhIE | ygaE | pull down |
| rhIE | yraI | pull down |

|     |      |           |
|-----|------|-----------|
| rho | tufA | pull down |
| rho | gsp  | pull down |
| rho | menF | pull down |
| rho | nusG | pull down |
| rho | rplC | pull down |
| rho | rplD | pull down |
| rho | rplL | pull down |
| rho | rpsB | pull down |
| rho | uspG | pull down |
| rho | yhbY | pull down |

|      |      |           |
|------|------|-----------|
| rimJ | groL | pull down |
|------|------|-----------|

|      |      |           |
|------|------|-----------|
| rimO | cybC | pull down |
| rimO | sdhA | pull down |
| rimO | dnaK | pull down |
| rimO | dtd  | pull down |
| rimO | fur  | pull down |
| rimO | iscS | pull down |
| rimO | nadE | pull down |
| rimO | rhsA | pull down |
| rimO | rhcC | pull down |
| rimO | rplQ | pull down |
| rimO | rpsC | pull down |
| rimO | rpsD | pull down |
| rimO | rpsE | pull down |
| rimO | slyB | pull down |
| rimO | stpA | pull down |

|      |       |           |
|------|-------|-----------|
| rimO | uspG  | pull down |
| rimO | ybgA  | pull down |
| rimP | rpsE  | pull down |
| rimP | rpsG  | pull down |
| rimP | yihI  | pull down |
| ribE | aas   | pull down |
| ribE | fusA  | pull down |
| ribE | maeB  | pull down |
| rplJ | dnaK  | pull down |
| rplJ | aspS  | pull down |
| rplK | dnaK  | pull down |
| rplK | inaA  | pull down |
| rplK | insC7 | pull down |
| rplK | nadE  | pull down |
| rplK | rcsF  | pull down |
| rplK | yfgD  | pull down |
| rplM | ycgL  | pull down |
| rplM | yeeT  | pull down |
| rplO | btuF  | pull down |
| rplO | ycgL  | pull down |
| rplQ | intS  | pull down |
| rplQ | slyD  | pull down |
| rplQ | yghW  | pull down |
| rplQ | yjgZ  | pull down |
| rplR | phoB  | pull down |
| rplR | plsY  | pull down |
| rplR | rimJ  | pull down |
| rplS | nanE  | pull down |
| rplB | aceK  | pull down |



|      |      |           |
|------|------|-----------|
| rplB | dnaK | pull down |
| rplB | uspG | pull down |
| rplB | uvrY | pull down |
| rplB | ygbA | pull down |

|      |      |           |
|------|------|-----------|
| rplV | yiiX | pull down |
| rplV | yjaA | pull down |
| rplV | yfmM | pull down |

|      |      |           |
|------|------|-----------|
| rplW | secA | pull down |
|------|------|-----------|

|      |      |           |
|------|------|-----------|
| rplX | phoB | pull down |
|------|------|-----------|

|      |      |           |
|------|------|-----------|
| rplY | dnaK | pull down |
|------|------|-----------|

|      |      |           |
|------|------|-----------|
| rpmA | cysQ | pull down |
| rpmA | greA | pull down |
| rpmA | nadE | pull down |
| rpmA | yjgZ | pull down |

|      |      |           |
|------|------|-----------|
| rplC | caiF | pull down |
| rplC | dnaK | pull down |
| rplC | menB | pull down |
| rplC | secD | pull down |
| rplC | xisE | pull down |
| rplC | yciH | pull down |
| rplC | yneG | pull down |

|      |      |           |
|------|------|-----------|
| rpmG | dnaK | pull down |
| rpmG | ninE | pull down |
| rpmG | ybfA | pull down |
| rpmG | ylbE | pull down |

|      |      |           |
|------|------|-----------|
| rplD | clpA | pull down |
| rplD | deaD | pull down |
| rplD | dnaK | pull down |
| rplD | dps  | pull down |
| rplD | fusA | pull down |
| rplD | gatZ | pull down |
| rplD | pflB | pull down |
| rplD | rho  | pull down |
| rplD | rnr  | pull down |
| rplD | rpoC | pull down |
| rplD | secA | pull down |
| rplD | slyD | pull down |
| rplD | srmB | pull down |
| rplD | ygiF | pull down |
| rplD | yhjB | pull down |

|      |      |           |
|------|------|-----------|
| rplF | mdtC | pull down |
| rplF | plsB | pull down |

|      |      |           |
|------|------|-----------|
| rplI | dnaK | pull down |
| rplI | ydcP | pull down |

|      |      |           |
|------|------|-----------|
| rlmL | appY | pull down |
| rlmL | fdnG | pull down |
| rlmL | lsrK | pull down |
| rlmL | nadE | pull down |
| rlmL | napC | pull down |
| rlmL | rplA | pull down |
| rlmL | rplA | pull down |
| rlmL | rplQ | pull down |
| rlmL | rplB | pull down |
| rlmL | rplC | pull down |
| rlmL | rpsC | pull down |
| rlmL | rpsD | pull down |
| rlmL | rpsG | pull down |
| rlmL | rpsI | pull down |
| rlmL | rsuA | pull down |
| rlmL | yfgI | pull down |
| rlmL | yfiF | pull down |

|      |      |           |
|------|------|-----------|
| rlmL | ygfJ | pull down |
| rlmL | ynbC | pull down |
| rlmM | groL | pull down |
| rlmM | fliY | pull down |
| rlmM | rplQ | pull down |
| rlmM | rplB | pull down |
| rlmM | rplD | pull down |
| rlmM | rlmA | pull down |
| rlmM | rnfB | pull down |
| rlmM | rpsM | pull down |
| rlmM | rpsC | pull down |
| rlmM | rpsG | pull down |
| rlmM | talB | pull down |
| rlmM | ygeR | pull down |
| rlmM | yghW | pull down |
| rlmN | aas  | pull down |
| rlmN | groL | pull down |
| rlmN | clpA | pull down |
| rlmN | clpB | pull down |
| rlmN | dapF | pull down |
| rlmN | hupA | pull down |
| rlmN | deaD | pull down |
| rlmN | lpdA | pull down |
| rlmN | dnaJ | pull down |
| rlmN | dnaJ | pull down |
| rlmN | fusA | pull down |
| rlmN | tufA | pull down |
| rlmN | tufA | pull down |
| rlmN | elaB | pull down |
| rlmN | fruR | pull down |
| rlmN | gatY | pull down |
| rlmN | gyrB | pull down |
| rlmN | hinT | pull down |
| rlmN | hrpA | pull down |
| rlmN | infB | pull down |
| rlmN | infC | pull down |
| rlmN | lon  | pull down |
| rlmN | malT | pull down |
| rlmN | matC | pull down |
| rlmN | tsr  | pull down |
| rlmN | melB | pull down |
| rlmN | metK | pull down |
| rlmN | mreB | pull down |

|      |      |           |
|------|------|-----------|
| rlmN | nadE | pull down |
| rlmN | nuoC | pull down |
| rlmN | nupX | pull down |
| rlmN | aceE | pull down |
| rlmN | aceF | pull down |
| rlmN | ompC | pull down |
| rlmN | phoE | pull down |
| rlmN | phoR | pull down |
| rlmN | pnp  | pull down |
| rlmN | rceB | pull down |
| rlmN | recA | pull down |
| rlmN | rplA | pull down |
| rlmN | rplA | pull down |
| rlmN | rplA | pull down |
| rlmN | rplM | pull down |
| rlmN | rplM | pull down |
| rlmN | rplO | pull down |
| rlmN | rplO | pull down |
| rlmN | rplQ | pull down |
| rlmN | rplR | pull down |
| rlmN | rplS | pull down |
| rlmN | rplS | pull down |
| rlmN | rplB | pull down |
| rlmN | rplB | pull down |
| rlmN | rplB | pull down |
| rlmN | rplT | pull down |
| rlmN | rplU | pull down |
| rlmN | rplV | pull down |
| rlmN | rplV | pull down |
| rlmN | rplW | pull down |
| rlmN | rplX | pull down |
| rlmN | rplX | pull down |
| rlmN | rpmA | pull down |
| rlmN | rpmB | pull down |
| rlmN | rpmC | pull down |
| rlmN | rplC | pull down |
| rlmN | rplC | pull down |
| rlmN | rplC | pull down |
| rlmN | rplD | pull down |
| rlmN | rplD | pull down |
| rlmN | rplE | pull down |
| rlmN | rplE | pull down |
| rlmN | rplF | pull down |
| rlmN | rplL | pull down |
| rlmN | rplI | pull down |

|      |      |           |
|------|------|-----------|
| rlmN | rplI | pull down |
| rlmN | rlmL | pull down |
| rlmN | rluB | pull down |
| rlmN | rluB | pull down |
| rlmN | rne  | pull down |
| rlmN | rnR  | pull down |
| rlmN | rnR  | pull down |
| rlmN | rpoC | pull down |
| rlmN | rpsA | pull down |
| rlmN | rpsA | pull down |
| rlmN | rpsJ | pull down |
| rlmN | rpsJ | pull down |
| rlmN | rpsN | pull down |
| rlmN | rpsP | pull down |
| rlmN | rpsR | pull down |
| rlmN | rpsB | pull down |
| rlmN | rpsB | pull down |
| rlmN | rpsC | pull down |
| rlmN | rpsC | pull down |
| rlmN | rpsD | pull down |
| rlmN | rpsD | pull down |
| rlmN | rpsE | pull down |
| rlmN | rpsE | pull down |
| rlmN | rpsF | pull down |
| rlmN | rpsG | pull down |
| rlmN | rpsG | pull down |
| rlmN | secA | pull down |
| rlmN | secA | pull down |
| rlmN | selB | pull down |
| rlmN | selB | pull down |
| rlmN | skp  | pull down |
| rlmN | spoT | pull down |
| rlmN | srmB | pull down |
| rlmN | srmB | pull down |
| rlmN | lysS | pull down |
| rlmN | lysU | pull down |
| rlmN | wcaD | pull down |
| rlmN | yaiT | pull down |
| rlmN | yciH | pull down |
| rlmN | ydcP | pull down |
| rlmN | yeeX | pull down |
| rlmN | yfiF | pull down |
| rlmN | yfiF | pull down |
| rlmN | ygaM | pull down |
| rlmN | ygiF | pull down |

|      |      |           |
|------|------|-----------|
| rlmN | yhbY | pull down |
| rlmN | yhiR | pull down |
| rlmN | yhiR | pull down |
| rlmN | yibL | pull down |

|      |      |           |
|------|------|-----------|
| rluB | aidB | pull down |
| rluB | hupA | pull down |
| rluB | hrpA | pull down |
| rluB | hrpA | pull down |
| rluB | matC | pull down |
| rluB | aceE | pull down |
| rluB | pnp  | pull down |
| rluB | pssA | pull down |
| rluB | rplA | pull down |
| rluB | rplA | pull down |
| rluB | rplM | pull down |
| rluB | rplM | pull down |
| rluB | rplS | pull down |
| rluB | rplB | pull down |
| rluB | rplU | pull down |
| rluB | rplV | pull down |
| rluB | rplX | pull down |
| rluB | rplY | pull down |
| rluB | rpmB | pull down |
| rluB | rplC | pull down |
| rluB | rplC | pull down |
| rluB | rplD | pull down |
| rluB | rplD | pull down |
| rluB | rplE | pull down |
| rluB | rplF | pull down |
| rluB | rplI | pull down |
| rluB | rplI | pull down |
| rluB | rlmL | pull down |
| rluB | rluE | pull down |
| rluB | rnR  | pull down |
| rluB | rnR  | pull down |
| rluB | rpsA | pull down |
| rluB | rpsA | pull down |
| rluB | rpsJ | pull down |
| rluB | rpsJ | pull down |
| rluB | rpsM | pull down |
| rluB | rpsN | pull down |
| rluB | rpsP | pull down |

|      |      |           |
|------|------|-----------|
| rluB | rpsR | pull down |
| rluB | rpsB | pull down |
| rluB | rpsT | pull down |
| rluB | rpsU | pull down |
| rluB | rpsC | pull down |
| rluB | rpsD | pull down |
| rluB | rpsE | pull down |
| rluB | rpsE | pull down |
| rluB | rpsF | pull down |
| rluB | rpsG | pull down |
| rluB | rpsG | pull down |
| rluB | srnB | pull down |
| rluB | srnB | pull down |
| rluB | alaS | pull down |
| rluB | trpH | pull down |
| rluB | ybhF | pull down |
| rluB | yciK | pull down |
| rluB | yfiF | pull down |
| rluB | ygiF | pull down |
| rluB | ygiF | pull down |
| rluB | yhbP | pull down |
| rluB | yhbY | pull down |
| rluB | yhcA | pull down |
| rluB | yhiN | pull down |
| rluB | yhiR | pull down |
| rluB | yhiR | pull down |
| rluB | yibL | pull down |

|      |      |           |
|------|------|-----------|
| rluC | accA | pull down |
| rluC | aidB | pull down |
| rluC | hupA | pull down |
| rluC | hupB | pull down |
| rluC | deaD | pull down |
| rluC | lpdA | pull down |
| rluC | lpdA | pull down |
| rluC | hrpA | pull down |
| rluC | aceE | pull down |
| rluC | aceF | pull down |
| rluC | pssA | pull down |
| rluC | pssA | pull down |
| rluC | ptsP | pull down |
| rluC | rhIE | pull down |
| rluC | rplA | pull down |
| rluC | rplA | pull down |
| rluC | rplA | pull down |

|      |      |           |
|------|------|-----------|
| rluC | rplM | pull down |
| rluC | rplM | pull down |
| rluC | rplN | pull down |
| rluC | rplO | pull down |
| rluC | rplO | pull down |
| rluC | rplP | pull down |
| rluC | rplQ | pull down |
| rluC | rplQ | pull down |
| rluC | rplR | pull down |
| rluC | rplS | pull down |
| rluC | rplS | pull down |
| rluC | rplB | pull down |
| rluC | rplB | pull down |
| rluC | rplB | pull down |
| rluC | rplT | pull down |
| rluC | rplU | pull down |
| rluC | rplU | pull down |
| rluC | rplV | pull down |
| rluC | rplV | pull down |
| rluC | rplX | pull down |
| rluC | rplX | pull down |
| rluC | rpmB | pull down |
| rluC | rplC | pull down |
| rluC | rplC | pull down |
| rluC | rplD | pull down |
| rluC | rplD | pull down |
| rluC | rplE | pull down |
| rluC | rplF | pull down |
| rluC | rplF | pull down |
| rluC | rplL | pull down |
| rluC | rplI | pull down |
| rluC | rplI | pull down |
| rluC | rlmL | pull down |
| rluC | rlmL | pull down |
| rluC | rluB | pull down |
| rluC | rluB | pull down |
| rluC | rluE | pull down |
| rluC | rnR  | pull down |
| rluC | rnR  | pull down |
| rluC | rpoB | pull down |
| rluC | rpoB | pull down |
| rluC | rpoC | pull down |
| rluC | rpoC | pull down |
| rluC | rpsA | pull down |
| rluC | rpsM | pull down |



|      |      |           |
|------|------|-----------|
| rluC | rpsM | pull down |
| rluC | rpsM | pull down |
| rluC | rpsN | pull down |
| rluC | rpsP | pull down |
| rluC | rpsR | pull down |
| rluC | rpsB | pull down |
| rluC | rpsB | pull down |
| rluC | rpsT | pull down |
| rluC | rpsC | pull down |
| rluC | rpsC | pull down |
| rluC | rpsD | pull down |
| rluC | rpsE | pull down |
| rluC | rpsE | pull down |
| rluC | rpsF | pull down |
| rluC | rpsG | pull down |
| rluC | rpsG | pull down |
| rluC | rpsG | pull down |
| rluC | secA | pull down |
| rluC | spoT | pull down |
| rluC | srmB | pull down |
| rluC | uspG | pull down |
| rluC | ybcJ | pull down |
| rluC | ybjD | pull down |
| rluC | yedD | pull down |
| rluC | yfiF | pull down |
| rluC | yfiF | pull down |
| rluC | ygiF | pull down |
| rluC | yhiR | pull down |
| rluC | yibL | pull down |
| rluC | yncE | pull down |
| rluC | yncE | pull down |

|       |      |           |
|-------|------|-----------|
| rmIA1 | def  | pull down |
| rmIA1 | feaR | pull down |
| rmIA1 | iaaA | pull down |
| rmIA1 | nadE | pull down |
| rmIA1 | yhcA | pull down |

|      |      |           |
|------|------|-----------|
| rfbB | lacZ | pull down |
| rfbB | nadE | pull down |
| rfbB | ugpQ | pull down |

|      |      |                                    |
|------|------|------------------------------------|
| rfbC | groL | pull down                          |
| rfbC | groL | pull down                          |
| rfbC | yhbT | pull down                          |
| rfbC | yhjA | pull down                          |
| rnb  | acs  | pull down                          |
| rnb  | fusA | pull down                          |
| rnb  | htpG | pull down                          |
| rnb  | nadE | pull down                          |
| rnb  | rpsE | pull down                          |
| rnb  | ileS | pull down                          |
| rnb  | thiC | pull down                          |
| rnd  | groL | pull down                          |
| rne  | deaD | pull down                          |
| rne  | deaD | affinity chromatography technology |
| rne  | dnaK | pull down                          |
| rne  | dnaK | affinity chromatography technology |
| rne  | dnaK | affinity chromatography technology |
| rne  | dnaK | affinity chromatography technology |
| rne  | dnaK | affinity chromatography technology |
| rne  | dnaK | pull down                          |
| rne  | dnaK | anti tag coimmunoprecipitation     |
| rne  | dnaK | affinity chromatography technology |
| rne  | dppF | affinity chromatography technology |
| rne  | tufA | pull down                          |
| rne  | eno  | pull down                          |
| rne  | eno  | affinity chromatography technology |
| rne  | eno  | affinity chromatography technology |
| rne  | eno  | affinity chromatography technology |
| rne  | eno  | affinity chromatography technology |
| rne  | eno  | affinity chromatography technology |
| rne  | eno  | pull down                          |
| rne  | eno  | affinity chromatography technology |
| rne  | eno  | affinity chromatography technology |
| rne  | eno  | molecular sieving                  |
| rne  | fabZ | pull down                          |
| rne  | fruR | pull down                          |
| rne  | hfq  | pull down                          |
| rne  | kch  | affinity chromatography technology |
| rne  | kch  | affinity chromatography technology |

|     |      |                                    |
|-----|------|------------------------------------|
| rne | kch  | affinity chromatography technology |
| rne | kch  | affinity chromatography technology |
| rne | kch  | affinity chromatography technology |
| rne | kch  | affinity chromatography technology |
| rne | kch  | affinity chromatography technology |
| rne | kefA | affinity chromatography technology |
| rne | kefA | affinity chromatography technology |
| rne | kefA | affinity chromatography technology |
| rne | kefA | affinity chromatography technology |
| rne | kefA | affinity chromatography technology |
| rne | kefA | affinity chromatography technology |
| rne | klcA | affinity chromatography technology |
| rne | klcA | affinity chromatography technology |
| rne | klcA | affinity chromatography technology |
| rne | pnp  | pull down                          |
| rne | pnp  | affinity chromatography technology |
| rne | pnp  | affinity chromatography technology |
| rne | pnp  | affinity chromatography technology |
| rne | pnp  | affinity chromatography technology |
| rne | pnp  | pull down                          |
| rne | pnp  | affinity chromatography technology |
| rne | rhIB | pull down                          |
| rne | rhIB | anti tag coimmunoprecipitation     |
| rne | rhIB | affinity chromatography technology |
| rne | rhIB | affinity chromatography technology |
| rne | rhIB | pull down                          |
| rne | rhIB | anti tag coimmunoprecipitation     |
| rne | rhIB | affinity chromatography technology |
| rne | rhIB | affinity chromatography technology |
| rne | rplA | pull down                          |
| rne | rplA | affinity chromatography technology |
| rne | rplA | affinity chromatography technology |
| rne | rplA | affinity chromatography technology |
| rne | rplA | affinity chromatography technology |
| rne | rplA | affinity chromatography technology |
| rne | rplK | pull down                          |
| rne | rplK | pull down                          |
| rne | rplM | pull down                          |
| rne | rplO | affinity chromatography technology |
| rne | rplO | affinity chromatography technology |
| rne | rplB | pull down                          |
| rne | rplB | affinity chromatography technology |
| rne | rplB | affinity chromatography technology |
| rne | rplB | pull down                          |

|     |      |                                    |
|-----|------|------------------------------------|
| rne | rplB | affinity chromatography technology |
| rne | rplU | pull down                          |
| rne | rplV | pull down                          |
| rne | rplV | pull down                          |
| rne | rplW | pull down                          |
| rne | rplX | pull down                          |
| rne | rpmB | affinity chromatography technology |
| rne | rpmB | affinity chromatography technology |
| rne | rplC | pull down                          |
| rne | rplC | pull down                          |
| rne | rplD | pull down                          |
| rne | rplD | pull down                          |
| rne | rplL | pull down                          |
| rne | rplI | pull down                          |
| rne | rplI | affinity chromatography technology |
| rne | rlmL | pull down                          |
| rne | rluB | pull down                          |
| rne | rnR  | pull down                          |
| rne | rpsJ | pull down                          |
| rne | rpsP | pull down                          |
| rne | rpsB | pull down                          |
| rne | rpsT | pull down                          |
| rne | rpsU | pull down                          |
| rne | rpsC | pull down                          |
| rne | rpsD | pull down                          |
| rne | rpsD | pull down                          |
| rne | rpsE | pull down                          |
| rne | rpsF | pull down                          |
| rne | rpsG | pull down                          |
| rne | rpsG | pull down                          |
| rne | sfmD | affinity chromatography technology |
| rne | sfmD | affinity chromatography technology |
| rne | sfmD | affinity chromatography technology |
| rne | sfmD | affinity chromatography technology |
| rne | sfmD | affinity chromatography technology |
| rne | srmB | pull down                          |
| rne | tktB | affinity chromatography technology |
| rne | tktB | affinity chromatography technology |
| rne | tktB | affinity chromatography technology |
| rne | tktB | affinity chromatography technology |
| rne | tktB | affinity chromatography technology |
| rne | tktB | affinity chromatography technology |
| rne | tktB | affinity chromatography technology |
| rne | tktB | affinity chromatography technology |
| rne | yceB | affinity chromatography technology |
| rne | yceB | affinity chromatography technology |

|     |      |                                    |
|-----|------|------------------------------------|
| rne | yceB | affinity chromatography technology |
| rne | ycgF | affinity chromatography technology |
| rne | ycgF | affinity chromatography technology |
| rne | ycgG | affinity chromatography technology |
| rne | ycgG | affinity chromatography technology |
| rne | ycgG | affinity chromatography technology |
| rne | ycgG | affinity chromatography technology |
| rne | ycgG | affinity chromatography technology |
| rne | ycgG | affinity chromatography technology |
| rne | ycgG | affinity chromatography technology |
| rne | yfiF | pull down                          |
| rne | yfiQ | pull down                          |
| rne | yhjC | affinity chromatography technology |
| rne | yhjC | affinity chromatography technology |

|     |      |           |
|-----|------|-----------|
| rng | dnaK | pull down |
| rng | eno  | pull down |
| rng | racC | pull down |
| rng | rplQ | pull down |
| rng | rplB | pull down |
| rng | rpe  | pull down |
| rng | rpsM | pull down |
| rng | rpsO | pull down |
| rng | rpsS | pull down |
| rng | rpsB | pull down |
| rng | rpsT | pull down |
| rng | rpsU | pull down |
| rng | rpsC | pull down |
| rng | rpsD | pull down |
| rng | rpsE | pull down |
| rng | rpsI | pull down |
| rng | rpsI | pull down |

|     |      |           |
|-----|------|-----------|
| rnr | cca  | pull down |
| rnr | hupA | pull down |
| rnr | deaD | pull down |
| rnr | infC | pull down |
| rnr | ihfA | pull down |
| rnr | intA | pull down |
| rnr | pgm  | pull down |
| rnr | pssA | pull down |
| rnr | rplA | pull down |
| rnr | rplA | pull down |

|     |      |           |
|-----|------|-----------|
| rnr | rplM | pull down |
| rnr | rplM | pull down |
| rnr | rplN | pull down |
| rnr | rplO | pull down |
| rnr | rplO | pull down |
| rnr | rplP | pull down |
| rnr | rplB | pull down |
| rnr | rplB | pull down |
| rnr | rplT | pull down |
| rnr | rplU | pull down |
| rnr | rplV | pull down |
| rnr | rplW | pull down |
| rnr | rplX | pull down |
| rnr | rplC | pull down |
| rnr | rplC | pull down |
| rnr | rplD | pull down |
| rnr | rplD | pull down |
| rnr | rplF | pull down |
| rnr | rplI | pull down |
| rnr | rplI | pull down |
| rnr | rlmL | pull down |
| rnr | rluC | pull down |
| rnr | rpsA | pull down |
| rnr | rpsK | pull down |
| rnr | rpsM | pull down |
| rnr | rpsM | pull down |
| rnr | rpsN | pull down |
| rnr | rpsO | pull down |
| rnr | rpsP | pull down |
| rnr | rpsP | pull down |
| rnr | rpsR | pull down |
| rnr | rpsB | pull down |
| rnr | rpsB | pull down |
| rnr | rpsT | pull down |
| rnr | rpsU | pull down |
| rnr | rpsC | pull down |
| rnr | rpsD | pull down |
| rnr | rpsD | pull down |
| rnr | rpsE | pull down |
| rnr | rpsE | pull down |
| rnr | rpsF | pull down |
| rnr | rpsF | pull down |
| rnr | rpsG | pull down |
| rnr | rpsG | pull down |
| rnr | rpsH | pull down |

|     |      |           |
|-----|------|-----------|
| rnr | rpsI | pull down |
| rnr | tgt  | pull down |
| rnr | yfiF | pull down |
| rnr | ygiF | pull down |

|      |      |           |
|------|------|-----------|
| rpoA | cspC | pull down |
| rpoA | hupA | pull down |
| rpoA | etk  | pull down |
| rpoA | fur  | pull down |
| rpoA | greA | pull down |
| rpoA | greB | pull down |
| rpoA | hybE | pull down |
| rpoA | mreB | pull down |
| rpoA | nusA | pull down |
| rpoA | nusA | pull down |
| rpoA | nusG | pull down |
| rpoA | nusG | pull down |
| rpoA | aceE | pull down |
| rpoA | aceF | pull down |
| rpoA | pssA | pull down |
| rpoA | pta  | pull down |
| rpoA | rapA | pull down |
| rpoA | rapA | pull down |
| rpoA | rapA | pull down |
| rpoA | rho  | pull down |
| rpoA | rplA | pull down |
| rpoA | rplM | pull down |
| rpoA | rplM | pull down |
| rpoA | rplO | pull down |
| rpoA | rplO | pull down |
| rpoA | rplP | pull down |
| rpoA | rplS | pull down |
| rpoA | rplB | pull down |
| rpoA | rplB | pull down |
| rpoA | rplU | pull down |
| rpoA | rplW | pull down |
| rpoA | rplX | pull down |
| rpoA | rpmA | pull down |
| rpoA | rpmB | pull down |
| rpoA | rplC | pull down |
| rpoA | rpmG | pull down |

|      |      |                  |
|------|------|------------------|
| rpoA | rplD | pull down        |
| rpoA | rplD | pull down        |
| rpoA | rplE | pull down        |
| rpoA | rplF | pull down        |
| rpoA | rplL | pull down        |
| rpoA | rpoB | blue native page |
| rpoA | rpoB | pull down        |
| rpoA | rpoB | pull down        |
| rpoA | rpoB | pull down        |
| rpoA | rpoC | blue native page |
| rpoA | rpoC | pull down        |
| rpoA | rpoC | pull down        |
| rpoA | rpoC | pull down        |
| rpoA | rpoD | pull down        |
| rpoA | rpoD | pull down        |
| rpoA | rpoD | pull down        |
| rpoA | rpoZ | pull down        |
| rpoA | rpoZ | pull down        |
| rpoA | rpsA | pull down        |
| rpoA | rpsJ | pull down        |
| rpoA | rpsM | pull down        |
| rpoA | rpsN | pull down        |
| rpoA | rpsO | pull down        |
| rpoA | rpsP | pull down        |
| rpoA | rpsS | pull down        |
| rpoA | rpsB | pull down        |
| rpoA | rpsT | pull down        |
| rpoA | rpsU | pull down        |
| rpoA | rpsC | pull down        |
| rpoA | rpsD | pull down        |
| rpoA | rpsD | pull down        |
| rpoA | rpsE | pull down        |
| rpoA | rpsF | pull down        |
| rpoA | rpsG | pull down        |
| rpoA | aspS | pull down        |
| rpoA | aspS | pull down        |
| rpoA | waaU | pull down        |
| rpoA | wecG | pull down        |

|      |      |           |
|------|------|-----------|
| rpoB | atpD | pull down |
| rpoB | cca  | pull down |
| rpoB | clpA | pull down |
| rpoB | cycA | pull down |



|      |      |            |
|------|------|------------|
| rpoB | cysB | pull down  |
| rpoB | hupA | pull down  |
| rpoB | hupA | pull down  |
| rpoB | sdhA | pull down  |
| rpoB | tufA | pull down  |
| rpoB | ldcA | pull down  |
| rpoB | mfd  | two hybrid |
| rpoB | mfd  | two hybrid |
| rpoB | mutL | pull down  |
| rpoB | nusA | pull down  |
| rpoB | nusA | pull down  |
| rpoB | nusG | pull down  |
| rpoB | nusG | pull down  |
| rpoB | ompL | pull down  |
| rpoB | pstB | pull down  |
| rpoB | rapA | pull down  |
| rpoB | rho  | pull down  |
| rpoB | rhsE | pull down  |
| rpoB | ribD | pull down  |
| rpoB | rplK | pull down  |
| rpoB | rplB | pull down  |
| rpoB | rplB | pull down  |
| rpoB | rplV | pull down  |
| rpoB | rpmG | pull down  |
| rpoB | rplD | pull down  |
| rpoB | rplL | pull down  |
| rpoB | rnfC | pull down  |
| rpoB | rpoH | pull down  |
| rpoB | rpoN | pull down  |
| rpoB | rpoA | pull down  |
| rpoB | rpoA | pull down  |
| rpoB | rpoC | pull down  |
| rpoB | rpoC | pull down  |
| rpoB | rpoC | pull down  |
| rpoB | rpoD | pull down  |
| rpoB | rpoD | pull down  |
| rpoB | rpoS | pull down  |
| rpoB | rpoZ | pull down  |
| rpoB | rpoZ | pull down  |
| rpoB | rpsJ | pull down  |
| rpoB | rpsJ | pull down  |
| rpoB | rpsN | pull down  |
| rpoB | rpsT | pull down  |
| rpoB | rpsU | pull down  |
| rpoB | rpsC | pull down  |

|      |      |           |
|------|------|-----------|
| rpoB | rpsE | pull down |
| rpoB | rpsF | pull down |
| rpoB | secA | pull down |
| rpoB | torR | pull down |
| rpoB | xdhD | pull down |
| rpoB | yacL | pull down |
| rpoB | yahO | pull down |
| rpoB | ybhF | pull down |
| rpoB | yidE | pull down |

|      |      |           |
|------|------|-----------|
| rpoC | clpB | pull down |
| rpoC | cysQ | pull down |
| rpoC | hupA | pull down |
| rpoC | sdhA | pull down |
| rpoC | dnaK | pull down |
| rpoC | flxA | pull down |
| rpoC | focA | pull down |
| rpoC | ftsK | pull down |
| rpoC | greB | pull down |
| rpoC | hemC | pull down |
| rpoC | htpG | pull down |
| rpoC | lon  | pull down |
| rpoC | metH | pull down |
| rpoC | nusA | pull down |
| rpoC | nusG | pull down |
| rpoC | nusG | pull down |
| rpoC | malP | pull down |
| rpoC | priA | pull down |
| rpoC | rapA | pull down |
| rpoC | rapA | pull down |
| rpoC | rhsD | pull down |
| rpoC | rplM | pull down |
| rpoC | rplO | pull down |
| rpoC | rplP | pull down |
| rpoC | rplQ | pull down |
| rpoC | rplS | pull down |
| rpoC | rplB | pull down |
| rpoC | rplB | pull down |
| rpoC | rplB | pull down |
| rpoC | rplV | pull down |
| rpoC | rplX | pull down |
| rpoC | rplC | pull down |
| rpoC | rplC | pull down |
| rpoC | rplD | pull down |
| rpoC | rplI | pull down |

|      |      |                     |
|------|------|---------------------|
| rpoC | rpoA | pull down           |
| rpoC | rpoB | cross-linking study |
| rpoC | rpoD | pull down           |
| rpoC | rpoZ | pull down           |
| rpoC | rpoZ | pull down           |
| rpoC | rpsA | pull down           |
| rpoC | rpsJ | pull down           |
| rpoC | rpsM | pull down           |
| rpoC | rpsP | pull down           |
| rpoC | rpsC | pull down           |
| rpoC | rpsD | pull down           |
| rpoC | rpsD | pull down           |
| rpoC | rpsE | pull down           |
| rpoC | rpsE | pull down           |
| rpoC | rpsG | pull down           |
| rpoC | rpsG | pull down           |
| rpoC | yagS | pull down           |
| rpoC | ycgE | pull down           |
| rpoC | ydfE | pull down           |
| rpoC | yfdV | pull down           |
| rpoC | ygcP | pull down           |
| rpoC | yjbH | pull down           |
| rpoC | ylbH | pull down           |

|      |      |           |
|------|------|-----------|
| rpoD | accA | pull down |
| rpoD | blc  | pull down |
| rpoD | tufA | pull down |
| rpoD | gadX | pull down |
| rpoD | gmhB | pull down |
| rpoD | infB | pull down |
| rpoD | infB | pull down |
| rpoD | matC | pull down |
| rpoD | mfd  | pull down |
| rpoD | nadE | pull down |
| rpoD | nusA | pull down |

|      |      |                      |
|------|------|----------------------|
| rpoD | nusA | pull down            |
| rpoD | pepB | pull down            |
| rpoD | potD | pull down            |
| rpoD | dnaG | pull down            |
| rpoD | rho  | pull down            |
| rpoD | rho  | pull down            |
| rpoD | rplA | pull down            |
| rpoD | rplA | pull down            |
| rpoD | rplO | pull down            |
| rpoD | rplS | pull down            |
| rpoD | rplB | pull down            |
| rpoD | rplU | pull down            |
| rpoD | rplV | pull down            |
| rpoD | rpmB | pull down            |
| rpoD | rplD | pull down            |
| rpoD | rplD | pull down            |
| rpoD | rplD | pull down            |
| rpoD | rplE | pull down            |
| rpoD | rplL | pull down            |
| rpoD | rpoA | pull down            |
| rpoD | rpoA | pull down            |
| rpoD | rpoB | pull down            |
| rpoD | rpoC | far western blotting |
| rpoD | rpoZ | pull down            |
| rpoD | rpoZ | pull down            |
| rpoD | rpsA | pull down            |
| rpoD | rpsB | pull down            |
| rpoD | rpsB | pull down            |
| rpoD | rpsC | pull down            |
| rpoD | rpsD | pull down            |
| rpoD | rpsE | pull down            |
| rpoD | rpsF | pull down            |
| rpoD | rpsG | pull down            |
| rpoD | rpsG | pull down            |
| rpoD | rsd  | two hybrid           |
| rpoD | yeeX | pull down            |
| rpoD | yfaS | pull down            |
| rpoD | yniC | pull down            |
| rppH | groL | pull down            |

|      |      |           |
|------|------|-----------|
| rppH | dapF | pull down |
| rppH | dapF | pull down |
| rppH | hupA | pull down |
| rppH | deaD | pull down |
| rppH | rplA | pull down |
| rppH | rplA | pull down |
| rppH | rplJ | pull down |
| rppH | rplM | pull down |
| rppH | rplM | pull down |
| rppH | rplN | pull down |
| rppH | rplO | pull down |
| rppH | rplO | pull down |
| rppH | rplP | pull down |
| rppH | rplQ | pull down |
| rppH | rplQ | pull down |
| rppH | rplR | pull down |
| rppH | rplR | pull down |
| rppH | rplS | pull down |
| rppH | rplS | pull down |
| rppH | rplB | pull down |
| rppH | rplB | pull down |
| rppH | rplB | pull down |
| rppH | rplT | pull down |
| rppH | rplU | pull down |
| rppH | rplV | pull down |
| rppH | rplV | pull down |
| rppH | rplX | pull down |
| rppH | rplY | pull down |
| rppH | rpmB | pull down |
| rppH | rplC | pull down |
| rppH | rplC | pull down |
| rppH | rplC | pull down |
| rppH | rplD | pull down |
| rppH | rplD | pull down |
| rppH | rplE | pull down |
| rppH | rplF | pull down |
| rppH | rplF | pull down |
| rppH | rplI | pull down |
| rppH | rplI | pull down |
| rppH | rlmL | pull down |
| rppH | rluB | pull down |
| rppH | rluC | pull down |
| rppH | rnr  | pull down |
| rppH | rpsA | pull down |
| rppH | rpsA | pull down |

|      |      |           |
|------|------|-----------|
| rppH | rpsM | pull down |
| rppH | rpsM | pull down |
| rppH | rpsR | pull down |
| rppH | rpsS | pull down |
| rppH | rpsB | pull down |
| rppH | rpsB | pull down |
| rppH | rpsT | pull down |
| rppH | rpsC | pull down |
| rppH | rpsD | pull down |
| rppH | rpsD | pull down |
| rppH | rpsE | pull down |
| rppH | rpsE | pull down |
| rppH | rpsF | pull down |
| rppH | rpsG | pull down |
| rppH | rpsG | pull down |
| rppH | rpsI | pull down |
| rppH | rtcB | pull down |
| rppH | slyD | pull down |
| rppH | spoT | pull down |
| rppH | srmB | pull down |
| rppH | xapR | pull down |
| rppH | yajQ | pull down |
| rppH | ydfH | pull down |
| rppH | ydfK | pull down |
| rppH | yfiF | pull down |
| rppH | yfiF | pull down |
| rppH | ynaE | pull down |

|      |      |           |
|------|------|-----------|
| rraA | ahpF | pull down |
| rraA | btuF | pull down |
| rraA | iscS | pull down |
| rraA | miaF | pull down |
| rraA | yehH | pull down |
| rraA | rplQ | pull down |
| rraA | yegQ | pull down |
| rraA | yehD | pull down |

|     |      |           |
|-----|------|-----------|
| frr | dxr  | pull down |
| frr | pgaC | pull down |
| frr | thil | pull down |

|      |      |           |
|------|------|-----------|
| rpsA | amiA | pull down |
| rpsA | matC | pull down |
| rpsA | moaC | pull down |
| rpsA | ompL | pull down |

|      |      |           |
|------|------|-----------|
| rpsA | slyD | pull down |
| rpsA | yfdP | pull down |

|      |      |           |
|------|------|-----------|
| rpsJ | nusB | pull down |
| rpsJ | nusB | pull down |
| rpsJ | nusB | pull down |

|      |      |           |
|------|------|-----------|
| rpsL | cspl | pull down |
| rpsL | hns  | pull down |
| rpsL | ycgL | pull down |
| rpsL | yedI | pull down |
| rpsL | yedN | pull down |

|      |      |           |
|------|------|-----------|
| rpsM | ycgE | pull down |
|------|------|-----------|

|      |      |           |
|------|------|-----------|
| rpsN | eutT | pull down |
| rpsN | relE | pull down |
| rpsN | ygaC | pull down |
| rpsN | yjfM | pull down |

|      |      |           |
|------|------|-----------|
| rpsO | amiA | pull down |
| rpsO | baeR | pull down |
| rpsO | yehH | pull down |
| rpsO | nadE | pull down |
| rpsO | ulaF | pull down |
| rpsO | ycgE | pull down |

|      |      |           |
|------|------|-----------|
| rpsP | btuD | pull down |
| rpsP | dnaK | pull down |
| rpsP | matC | pull down |
| rpsP | nadE | pull down |

|      |      |           |
|------|------|-----------|
| rpsR | yafO | pull down |
| rpsR | yciH | pull down |

|      |      |                  |
|------|------|------------------|
| rpsS | fliG | two hybrid array |
| rpsS | gph  | two hybrid array |
| rpsS | rpoE | two hybrid array |

|      |      |           |
|------|------|-----------|
| rpsB | sdhA | pull down |
| rpsB | htpG | pull down |

|      |      |           |
|------|------|-----------|
| rpsB | malQ | pull down |
| rpsC | ynaE | pull down |
| rpsD | fmt  | pull down |
| rpsD | nusG | pull down |
| rpsD | rlmH | pull down |
| rpsD | sxy  | pull down |
| rpsD | yafO | pull down |
| rpsD | ybiA | pull down |
| rpsD | ycgE | pull down |
| rpsD | ydfK | pull down |
| rpsD | yghW | pull down |
| rpsD | ynaE | pull down |
| rpsE | gyrA | pull down |
| rpsE | gyrB | pull down |
| rpsE | nfnB | pull down |
| rpsE | nrdR | pull down |
| rpsE | rimK | pull down |
| rpsE | ydfK | pull down |
| rpsE | ynaE | pull down |
| rpsE | yohF | pull down |
| rpsF | dnaK | pull down |
| rpsF | mnmG | pull down |
| rpsF | thrS | pull down |
| rpsF | ulaC | pull down |
| rpsF | yeeX | pull down |
| rpsF | yfiH | pull down |
| rpsG | tig  | pull down |
| rpsH | rlmH | pull down |
| rpsH | vsr  | pull down |
| rpsI | rlmH | pull down |
| rpsI | yciH | pull down |
| rpsI | yghW | pull down |
| rsmA | groL | pull down |



|      |      |           |
|------|------|-----------|
| rsmA | guaA | pull down |
| rsmA | murB | pull down |
| rsmB | phnD | pull down |
| rsmB | rplQ | pull down |
| rsmB | rplB | pull down |
| rsmB | rplC | pull down |
| rsmB | rplD | pull down |
| rsmB | rpsD | pull down |
| rsmB | rpsG | pull down |
| rsmB | rpsI | pull down |
| rsmB | topA | pull down |
| rsmB | ydfK | pull down |
| rsmB | ylil | pull down |
| rsmB | ynaE | pull down |
| rsmC | hyaB | pull down |
| rsmC | nadE | pull down |
| rsmC | rplB | pull down |
| rsmC | rplD | pull down |
| rsmC | rpsM | pull down |
| rsmC | rpsC | pull down |
| rsmC | rpsD | pull down |
| rsmC | rpsG | pull down |
| rsmC | rpsI | pull down |
| rsmC | udk  | pull down |
| rsmC | ycgE | pull down |
| rsmC | yciH | pull down |
| rsmD | dnaK | pull down |
| rsmD | tufA | pull down |
| rsmD | lldR | pull down |
| rsmD | ompW | pull down |
| rsmD | rplB | pull down |
| rsmE | rplQ | pull down |
| rsmE | rpsD | pull down |
| rsmE | slyD | pull down |
| rsmE | supH | pull down |
| rsmH | prs  | pull down |
| rsmH | rplC | pull down |
| rsmH | rplL | pull down |

|      |      |           |
|------|------|-----------|
| rsmH | rpsJ | pull down |
| rsmI | aceF | pull down |
| rsmI | rpsD | pull down |
| rsmI | yhfS | pull down |
| rstA | groL | pull down |
| rstA | glnK | pull down |
| rstA | hchA | pull down |
| rstA | prs  | pull down |
| rstA | rlmA | pull down |
| rstA | uspG | pull down |
| rstA | yfdO | pull down |
| rstA | yhdN | pull down |
| rstA | ymfM | pull down |
| rsuA | greB | pull down |
| rsuA | rpsJ | pull down |
| rsuA | rpsJ | pull down |
| rsuA | rpsM | pull down |
| rsuA | rpsP | pull down |
| rsuA | rpsB | pull down |
| rsuA | rpsD | pull down |
| rsuA | rpsI | pull down |
| rsuA | ycjF | pull down |
| rsuA | ygeY | pull down |
| rumB | appY | pull down |
| rumB | groL | pull down |
| rumB | nadE | pull down |
| rumB | rhaS | pull down |
| rumB | rplA | pull down |
| rumB | rplB | pull down |
| rumB | yciH | pull down |
| ruvA | crl  | pull down |
| ruvA | nadE | pull down |
| ruvA | rplW | pull down |
| ruvA | tadA | pull down |
| ruvA | tatE | pull down |
| sapD | groL | pull down |
| sapD | ybfO | pull down |

|      |      |                      |
|------|------|----------------------|
| sdaA | zwf  | pull down            |
| sdaA | prpD | pull down            |
| sdaA | ydiU | pull down            |
| sdaB | b1c  | pull down            |
| secA | aas  | pull down            |
| secA | bioB | pull down            |
| secA | dnaK | pull down            |
| secA | tufA | pull down            |
| secA | tufA | pull down            |
| secA | gatZ | pull down            |
| secA | infC | pull down            |
| secA | metK | pull down            |
| secA | minD | pull down            |
| secA | motA | pull down            |
| secA | mreB | pull down            |
| secA | norV | pull down            |
| secA | ycfB | pull down            |
| secA | rho  | pull down            |
| secA | rplK | pull down            |
| secA | rplV | pull down            |
| secA | rplD | pull down            |
| secA | rplL | pull down            |
| secA | rpsB | pull down            |
| secA | secA | blue native page     |
| secA | secB | pull down            |
| secA | secB | pull down            |
| secA | secY | far western blotting |
| secA | ybiU | pull down            |
| secA | ycaO | pull down            |
| secA | ydgA | blue native page     |
| secA | yjiY | blue native page     |
| secB | cpxR | pull down            |
| secB | lon  | pull down            |
| secB | lon  | pull down            |
| secB | motB | pull down            |
| secB | nrdI | pull down            |
| secB | -    | pull down            |
| secB | rpsC | pull down            |
| secB | secA | pull down            |
| secB | ybgK | pull down            |

|      |      |           |
|------|------|-----------|
| selB | dnaJ | pull down |
| selB | dnaJ | pull down |
| selB | aceE | pull down |
| selB | aceF | pull down |
| selB | ompL | pull down |
| selB | pta  | pull down |
| selB | rho  | pull down |
| selB | rplA | pull down |
| selB | rplM | pull down |
| selB | rplO | pull down |
| selB | rplQ | pull down |
| selB | rplS | pull down |
| selB | rplB | pull down |
| selB | rplB | pull down |
| selB | rplT | pull down |
| selB | rplU | pull down |
| selB | rplV | pull down |
| selB | rplX | pull down |
| selB | rplY | pull down |
| selB | rpmB | pull down |
| selB | rplC | pull down |
| selB | rplC | pull down |
| selB | rplD | pull down |
| selB | rplL | pull down |
| selB | rplI | pull down |
| selB | rluB | pull down |
| selB | rnR  | pull down |
| selB | rpsA | pull down |
| selB | rpsT | pull down |
| selB | rpsC | pull down |
| selB | rpsD | pull down |
| selB | rpsD | pull down |
| selB | rpsE | pull down |
| selB | rpsF | pull down |
| selB | rpsG | pull down |
| selB | rpsI | pull down |
| selB | srmB | pull down |
| selB | srmB | pull down |
| selB | yfiF | pull down |
| selB | yfiF | pull down |
| selD | bioC | pull down |
| selD | lhr  | pull down |
| selD | mukB | pull down |
| selD | nadE | pull down |

|      |      |           |
|------|------|-----------|
| selD | rplB | pull down |
| selD | rpoC | pull down |
| selD | rpsI | pull down |
| selD | yhcA | pull down |

|      |      |           |
|------|------|-----------|
| seqA | umuC | pull down |
|------|------|-----------|

|      |      |           |
|------|------|-----------|
| serB | nadE | pull down |
|------|------|-----------|

|      |      |           |
|------|------|-----------|
| sgrR | groL | pull down |
| sgrR | fumB | pull down |

|     |      |           |
|-----|------|-----------|
| skp | rplM | pull down |
| skp | rplO | pull down |
| skp | rplS | pull down |
| skp | rplU | pull down |
| skp | rplV | pull down |
| skp | rplX | pull down |
| skp | rplE | pull down |
| skp | rplI | pull down |
| skp | rnr  | pull down |
| skp | rpsM | pull down |
| skp | spoT | pull down |
| skp | glyS | pull down |
| skp | hisS | pull down |

|     |     |                  |
|-----|-----|------------------|
| slp | slp | blue native page |
|-----|-----|------------------|

|      |      |           |
|------|------|-----------|
| slyD | betA | pull down |
| slyD | hupA | pull down |
| slyD | hupB | pull down |
| slyD | fliC | pull down |
| slyD | gltL | pull down |
| slyD | grcA | pull down |
| slyD | hypB | pull down |

|      |       |           |
|------|-------|-----------|
| slyD | hypB  | pull down |
| slyD | insA7 | pull down |
| slyD | lacI  | pull down |
| slyD | nudL  | pull down |
| slyD | nusG  | pull down |
| slyD | rplN  | pull down |
| slyD | rplO  | pull down |
| slyD | rplW  | pull down |
| slyD | rpmA  | pull down |
| slyD | rplE  | pull down |
| slyD | rplF  | pull down |
| slyD | rpsD  | pull down |
| slyD | rpsE  | pull down |
| slyD | rpsI  | pull down |
| slyD | sapD  | pull down |
| slyD | serS  | pull down |
| slyD | ulaF  | pull down |
| slyD | ycgX  | pull down |
| slyD | ydeI  | pull down |
| slyD | yhdZ  | pull down |
| slyD | yhjQ  | pull down |

|      |      |           |
|------|------|-----------|
| sodB | evgA | pull down |
| sodB | pal  | pull down |
| sodB | rplB | pull down |
| sodB | slyD | pull down |
| sodB | ygaE | pull down |

|      |      |           |
|------|------|-----------|
| sodA | alr  | pull down |
| sodA | atoA | pull down |
| sodA | glpC | pull down |
| sodA | intS | pull down |
| sodA | rhIE | pull down |
| sodA | yicC | pull down |

|      |      |           |
|------|------|-----------|
| speA | nadE | pull down |
| speA | priC | pull down |
| speA | rhaS | pull down |
| speA | rplQ | pull down |
| speA | rplB | pull down |
| speA | rpoC | pull down |
| speA | rpsB | pull down |
| speA | rpsC | pull down |

|      |      |           |
|------|------|-----------|
| speA | rpsD | pull down |
| speA | rpsG | pull down |
| speA | yaiV | pull down |
| speA | ydeP | pull down |
| speD | acnB | pull down |
| speD | dnaK | pull down |
| speD | ftsB | pull down |
| spoT | acpP | pull down |
| spoT | hupA | pull down |
| spoT | deaD | pull down |
| spoT | tufA | pull down |
| spoT | hrpA | pull down |
| spoT | mukB | pull down |
| spoT | rplM | pull down |
| spoT | rplO | pull down |
| spoT | rplQ | pull down |
| spoT | rplR | pull down |
| spoT | rplS | pull down |
| spoT | rplB | pull down |
| spoT | rplB | pull down |
| spoT | rplU | pull down |
| spoT | rplV | pull down |
| spoT | rplV | pull down |
| spoT | rplX | pull down |
| spoT | rpmB | pull down |
| spoT | rplC | pull down |
| spoT | rplC | pull down |
| spoT | rplD | pull down |
| spoT | rplD | pull down |
| spoT | rplL | pull down |
| spoT | rplI | pull down |
| spoT | rluB | pull down |
| spoT | rpoC | pull down |
| spoT | rpsA | pull down |
| spoT | rpsJ | pull down |
| spoT | rpsK | pull down |
| spoT | rpsL | pull down |
| spoT | rpsN | pull down |
| spoT | rpsP | pull down |
| spoT | rpsR | pull down |
| spoT | rpsB | pull down |
| spoT | rpsT | pull down |
| spoT | rpsC | pull down |

|      |      |           |
|------|------|-----------|
| spoT | rpsD | pull down |
| spoT | rpsE | pull down |
| spoT | rpsF | pull down |
| spoT | rpsG | pull down |
| spoT | rpsG | pull down |
| spoT | rpsH | pull down |
| spoT | rpsI | pull down |
| spoT | srmB | pull down |
| spoT | tolR | pull down |
| spoT | trmH | pull down |
| spoT | yubM | pull down |

|      |      |           |
|------|------|-----------|
| srmB | dnaB | pull down |
| srmB | dnaJ | pull down |
| srmB | tufA | pull down |
| srmB | rplA | pull down |
| srmB | rplB | pull down |
| srmB | rplB | pull down |
| srmB | rplV | pull down |
| srmB | rplV | pull down |
| srmB | rplW | pull down |
| srmB | rplX | pull down |
| srmB | rplX | pull down |
| srmB | rplD | pull down |
| srmB | rplD | pull down |
| srmB | rplL | pull down |
| srmB | rlmL | pull down |
| srmB | rluB | pull down |
| srmB | rpsB | pull down |
| srmB | rpsC | pull down |
| srmB | rpsI | pull down |

|     |      |           |
|-----|------|-----------|
| ffh | adhE | pull down |
| ffh | clpA | pull down |
| ffh | lon  | pull down |
| ffh | metK | pull down |

|     |      |           |
|-----|------|-----------|
| ssb | pepD | pull down |
| ssb | rhIE | pull down |

|      |      |           |
|------|------|-----------|
| sspA | groL | pull down |
| sspA | dnaK | pull down |
| sspA | hrsA | pull down |



|      |      |           |
|------|------|-----------|
| sspA | pf1B | pull down |
| sspA | rplI | pull down |
| sspA | rpoA | pull down |
| sspA | rpoB | pull down |
| sspA | rpoC | pull down |
| sspA | lysU | pull down |
| sspA | serS | pull down |
| sspA | thiG | pull down |
| sspA | tyrP | pull down |
| sspA | ybaT | pull down |

|      |      |           |
|------|------|-----------|
| smpB | aidB | pull down |
| smpB | clpA | pull down |
| smpB | hupA | pull down |
| smpB | hupB | pull down |
| smpB | gyrA | pull down |
| smpB | gyrB | pull down |
| smpB | infB | pull down |
| smpB | parC | pull down |
| smpB | malP | pull down |
| smpB | rplA | pull down |
| smpB | rplM | pull down |
| smpB | rplX | pull down |
| smpB | rpmB | pull down |
| smpB | rplF | pull down |
| smpB | rplF | pull down |
| smpB | rpsA | pull down |
| smpB | rpsA | pull down |
| smpB | rpsN | pull down |
| smpB | rpsB | pull down |
| smpB | rpsB | pull down |
| smpB | rpsC | pull down |
| smpB | rpsE | pull down |
| smpB | secA | pull down |
| smpB | selB | pull down |
| smpB | skp  | pull down |
| smpB | trmL | pull down |
| smpB | vsr  | pull down |
| smpB | ycbB | pull down |
| smpB | ycfJ | pull down |
| smpB | ycgE | pull down |
| smpB | yeeX | pull down |
| smpB | yfiF | pull down |

|      |      |           |
|------|------|-----------|
| stfR | metL | pull down |
|------|------|-----------|

|      |      |                                                   |
|------|------|---------------------------------------------------|
| stfR | arpA | pull down                                         |
| stfR | polA | pull down                                         |
| stfR | aceE | pull down                                         |
| stfR | pgaC | pull down                                         |
| stfR | rplB | pull down                                         |
| stfR | yegQ | pull down                                         |
| stpA | htpG | pull down                                         |
| stpA | prs  | pull down                                         |
| stpA | rplB | pull down                                         |
| stpA | rpsD | pull down                                         |
| stpA | slyD | pull down                                         |
| stpA | ycgE | pull down                                         |
| sucC | sdhA | pull down                                         |
| sucC | zwf  | pull down                                         |
| sucC | prs  | pull down                                         |
| sucC | sucB | pull down                                         |
| sucC | rsuA | pull down                                         |
| sucC | sucD | blue native page                                  |
| sucC | sucD | pull down                                         |
| sucC | sucD | comigration in non denaturing gel electrophoresis |
| sucC | umuC | pull down                                         |
| sucD | sdhA | pull down                                         |
| sucD | dnaE | pull down                                         |
| sucD | rsuA | pull down                                         |
| sufC | groL | pull down                                         |
| sufC | cysK | pull down                                         |
| sufC | mgo  | pull down                                         |
| sufC | murB | pull down                                         |
| sufC | rplA | pull down                                         |
| sufC | sufB | pull down                                         |
| sufC | sufD | pull down                                         |
| sufC | ybhS | pull down                                         |
| sufS | groL | pull down                                         |
| sufS | dps  | pull down                                         |
| sufS | lon  | pull down                                         |
| sufS | mdtH | pull down                                         |
| sufS | ybdR | pull down                                         |
| sufS | yfaQ | pull down                                         |
| sufS | yhcA | pull down                                         |

|      |      |           |
|------|------|-----------|
| surA | lpdA | pull down |
| surA | dnaK | pull down |
| surA | ftsH | pull down |
| surA | chbC | pull down |
| surA | rplL | pull down |
| surA | rpsN | pull down |
| surA | ilvA | pull down |
| surA | ydaY | pull down |

|      |      |           |
|------|------|-----------|
| alaS | bcsB | pull down |
| alaS | dnaK | pull down |
| alaS | tufA | pull down |
| alaS | rpsB | pull down |
| alaS | rspA | pull down |
| alaS | ydfR | pull down |
| alaS | yfaA | pull down |

|      |      |           |
|------|------|-----------|
| cysS | def  | pull down |
| cysS | nadE | pull down |

|      |      |           |
|------|------|-----------|
| aspS | acnB | pull down |
| aspS | gltD | pull down |
| aspS | moaC | pull down |
| aspS | nadE | pull down |
| aspS | nohA | pull down |
| aspS | rpoC | pull down |
| aspS | slyD | pull down |
| aspS | asnS | pull down |

|      |      |           |
|------|------|-----------|
| gltX | lptD | pull down |
| gltX | matC | pull down |
| gltX | rplD | pull down |
| gltX | rpsC | pull down |
| gltX | slyD | pull down |
| gltX | ydfR | pull down |

|      |      |           |
|------|------|-----------|
| pheT | mdtO | pull down |
| pheT | mfd  | pull down |
| pheT | rpsB | pull down |
| pheT | secD | pull down |
| pheT | pheS | pull down |
| pheT | pheS | pull down |
| pheT | yeaJ | pull down |
| pheT | yghQ | pull down |

|      |      |           |
|------|------|-----------|
| glyQ | dnaJ | pull down |
| glyQ | dnaJ | pull down |
| glyQ | tufA | pull down |
| glyQ | glpQ | pull down |
| glyQ | prc  | pull down |
| glyQ | rplM | pull down |
| glyQ | rplP | pull down |
| glyQ | rplS | pull down |
| glyQ | rplU | pull down |
| glyQ | rplV | pull down |
| glyQ | rpmB | pull down |
| glyQ | rplD | pull down |
| glyQ | rplF | pull down |
| glyQ | rpsM | pull down |
| glyQ | rpsP | pull down |
| glyQ | rpsB | pull down |
| glyQ | rpsC | pull down |
| glyQ | rpsE | pull down |

|      |      |           |
|------|------|-----------|
| glyS | dnaC | pull down |
| glyS | helD | pull down |
| glyS | ttdA | pull down |

|      |      |           |
|------|------|-----------|
| ileS | allR | pull down |
| ileS | dnaJ | pull down |
| ileS | tufA | pull down |
| ileS | glpD | pull down |
| ileS | hyaD | pull down |
| ileS | ppk  | pull down |
| ileS | rbsB | pull down |
| ileS | yccE | pull down |
| ileS | yjgL | pull down |

|      |      |           |
|------|------|-----------|
| lysS | bioA | pull down |
| lysS | gcd  | pull down |
| lysS | fadJ | pull down |
| lysS | nadE | pull down |
| lysS | pdxJ | pull down |
| lysS | phoB | pull down |
| lysS | ptrA | pull down |
| lysS | rhaS | pull down |
| lysS | rhaA | pull down |
| lysS | tdcD | pull down |
| lysS | ydeP | pull down |
| lysS | ygeV | pull down |

|      |      |           |
|------|------|-----------|
| lysU | adhE | pull down |
| lysU | katE | pull down |
| lysU | clpB | pull down |
| lysU | cspC | pull down |
| lysU | cysK | pull down |
| lysU | lysA | pull down |
| lysU | gadA | pull down |
| lysU | gadB | pull down |
| lysU | dps  | pull down |
| lysU | dps  | pull down |
| lysU | fusA | pull down |
| lysU | eno  | pull down |
| lysU | eno  | pull down |
| lysU | focB | pull down |
| lysU | grcA | pull down |
| lysU | nlpI | pull down |
| lysU | pflB | pull down |
| lysU | pflB | pull down |
| lysU | pgk  | pull down |
| lysU | rpoB | pull down |
| lysU | rpoC | pull down |
| lysU | ileS | pull down |
| lysU | serS | pull down |
| lysU | tnaA | pull down |
| lysU | wcaI | pull down |
| lysU | wrbA | pull down |
| lysU | yagJ | pull down |
| lysU | ydhJ | pull down |
| lysU | yehI | pull down |
| lysU | yfcZ | pull down |
| lysU | ygiW | pull down |
| lysU | yhjX | pull down |

|      |      |           |
|------|------|-----------|
| leuS | map  | pull down |
| leuS | groL | pull down |
| leuS | htrE | pull down |
| leuS | hycE | pull down |
| leuS | rplK | pull down |
| leuS | rplW | pull down |
| leuS | rplC | pull down |
| leuS | rplD | pull down |
| leuS | rplL | pull down |
| leuS | rpsJ | pull down |
| leuS | rpsP | pull down |

|      |      |                                                   |
|------|------|---------------------------------------------------|
| leuS | rpsB | pull down                                         |
| leuS | yeaP | pull down                                         |
| leuS | yjbH | pull down                                         |
| metG | rplB | pull down                                         |
| asnS | nadE | pull down                                         |
| proS | groL | pull down                                         |
| proS | dnaN | pull down                                         |
| proS | fliN | two hybrid array                                  |
| proS | aceE | pull down                                         |
| proS | -    | comigration in non denaturing gel electrophoresis |
| argS | sdhA | pull down                                         |
| argS | nuoG | pull down                                         |
| argS | aceE | pull down                                         |
| argS | pheT | pull down                                         |
| argS | ybdO | comigration in non denaturing gel electrophoresis |
| argS | ydeP | pull down                                         |
| serS | bcsB | pull down                                         |
| serS | groL | pull down                                         |
| serS | gatZ | pull down                                         |
| serS | recF | pull down                                         |
| serS | yeiR | pull down                                         |
| serS | yfjD | pull down                                         |
| serS | yjfN | pull down                                         |
| thrS | dnaK | pull down                                         |
| thrS | eno  | pull down                                         |
| thrS | ibpA | pull down                                         |
| thrS | nadE | pull down                                         |
| thrS | recR | pull down                                         |
| thrS | rplA | pull down                                         |
| thrS | rplA | pull down                                         |
| thrS | rplM | pull down                                         |
| thrS | rplS | pull down                                         |
| thrS | rplV | pull down                                         |
| thrS | rplC | pull down                                         |
| thrS | rplI | pull down                                         |
| thrS | rpe  | pull down                                         |
| thrS | rpsA | pull down                                         |

|      |      |                                                   |
|------|------|---------------------------------------------------|
| thrS | rpsJ | pull down                                         |
| thrS | rpsM | pull down                                         |
| thrS | rpsN | pull down                                         |
| thrS | rpsB | pull down                                         |
| thrS | rpsT | pull down                                         |
| thrS | rpsC | pull down                                         |
| thrS | rpsE | pull down                                         |
| thrS | rpsF | pull down                                         |
| thrS | rpsG | pull down                                         |
| thrS | wcaB | pull down                                         |
| thrS | yggM | pull down                                         |
| thrS | yhbY | pull down                                         |
| thrS | yicC | pull down                                         |
| valS | yhgF | pull down                                         |
| trpS | map  | pull down                                         |
| trpS | ddg  | pull down                                         |
| trpS | lasT | pull down                                         |
| trpS | nadE | pull down                                         |
| trpS | ppk  | pull down                                         |
| trpS | rplM | pull down                                         |
| trpS | rplV | pull down                                         |
| trpS | rplC | pull down                                         |
| trpS | rpsB | pull down                                         |
| trpS | rpsD | pull down                                         |
| trpS | rpsE | pull down                                         |
| trpS | selD | pull down                                         |
| tyrS | bioC | pull down                                         |
| tyrS | sdhA | pull down                                         |
| tyrS | dnaK | pull down                                         |
| tyrS | dnaK | pull down                                         |
| tyrS | nadE | pull down                                         |
| tyrS | sucB | pull down                                         |
| tyrS | secA | pull down                                         |
| tyrS | ybgF | pull down                                         |
| talA | matC | pull down                                         |
| talA | nadE | pull down                                         |
| talB | malE | comigration in non denaturing gel electrophoresis |

|     |      |           |
|-----|------|-----------|
| tas | groL | pull down |
| tas | otsB | pull down |

|     |      |           |
|-----|------|-----------|
| tdh | groL | pull down |
| tdh | ebgR | pull down |
| tdh | nadE | pull down |

|      |      |           |
|------|------|-----------|
| tehB | groL | pull down |
| tehB | mqo  | pull down |
| tehB | rplB | pull down |
| tehB | yibL | pull down |

|      |      |           |
|------|------|-----------|
| tesB | kdpB | pull down |
| tesB | lacZ | pull down |
| tesB | dnaK | pull down |
| tesB | nadE | pull down |
| tesB | secD | pull down |

|     |      |           |
|-----|------|-----------|
| tgt | bcsA | pull down |
| tgt | groL | pull down |
| tgt | hupA | pull down |
| tgt | hupB | pull down |
| tgt | deaD | pull down |
| tgt | intE | pull down |
| tgt | aceB | pull down |
| tgt | nadE | pull down |
| tgt | aceE | pull down |
| tgt | aceF | pull down |
| tgt | rplA | pull down |
| tgt | rplM | pull down |
| tgt | rplQ | pull down |
| tgt | rplS | pull down |
| tgt | rplB | pull down |
| tgt | rplB | pull down |
| tgt | rplT | pull down |
| tgt | rplU | pull down |
| tgt | rplV | pull down |
| tgt | rplX | pull down |
| tgt | rpmB | pull down |
| tgt | rplC | pull down |
| tgt | rplD | pull down |



|      |      |                              |
|------|------|------------------------------|
| tgt  | rplL | pull down                    |
| tgt  | rplI | pull down                    |
| tgt  | rplI | pull down                    |
| tgt  | rlmL | pull down                    |
| tgt  | rluB | pull down                    |
| tgt  | rpoB | pull down                    |
| tgt  | rpsA | pull down                    |
| tgt  | rpsL | pull down                    |
| tgt  | rpsN | pull down                    |
| tgt  | rpsE | pull down                    |
| tgt  | rpsG | pull down                    |
| tgt  | smpB | pull down                    |
| tgt  | yfiF | pull down                    |
| tgt  | yfiF | pull down                    |
| lacA | dnaK | pull down                    |
| lacA | prs  | pull down                    |
| thiI | livF | pull down                    |
| thiI | rplA | pull down                    |
| thiI | rplB | pull down                    |
| thiK | groL | pull down                    |
| thiK | kdsD | pull down                    |
| thiK | ribB | pull down                    |
| thiK | rpsD | pull down                    |
| thiK | slyD | pull down                    |
| thiL | appY | pull down                    |
| thiL | groL | pull down                    |
| thiL | cspE | pull down                    |
| thiL | nadE | pull down                    |
| thiL | rfaC | pull down                    |
| thiL | rpmB | pull down                    |
| thiL | slyD | pull down                    |
| thiL | tatE | pull down                    |
| trxA | acnB | tandem affinity purification |
| trxA | acnB | tandem affinity purification |
| trxA | acnB | tandem affinity purification |
| trxA | add  | tandem affinity purification |
| trxA | flu  | tandem affinity purification |
| trxA | fbaA | tandem affinity purification |

|      |      |                              |
|------|------|------------------------------|
| trxA | atpA | tandem affinity purification |
| trxA | atpD | tandem affinity purification |
| trxA | atpD | tandem affinity purification |
| trxA | lacZ | tandem affinity purification |
| trxA | lacZ | tandem affinity purification |
| trxA | groS | tandem affinity purification |
| trxA | clpP | tandem affinity purification |
| trxA | cspA | tandem affinity purification |
| trxA | dapD | tandem affinity purification |
| trxA | dapD | tandem affinity purification |
| trxA | hupB | tandem affinity purification |
| trxA | sdhA | tandem affinity purification |
| trxA | dksA | tandem affinity purification |
| trxA | fusA | tandem affinity purification |
| trxA | fusA | tandem affinity purification |
| trxA | efp  | tandem affinity purification |
| trxA | tsf  | tandem affinity purification |
| trxA | eno  | tandem affinity purification |
| trxA | eno  | tandem affinity purification |
| trxA | fabA | tandem affinity purification |
| trxA | fabA | tandem affinity purification |
| trxA | fabG | tandem affinity purification |
| trxA | fabI | tandem affinity purification |
| trxA | fabZ | tandem affinity purification |
| trxA | fadB | tandem affinity purification |
| trxA | fdoG | tandem affinity purification |
| trxA | fkIB | tandem affinity purification |
| trxA | ftsZ | tandem affinity purification |
| trxA | fur  | tandem affinity purification |
| trxA | gapA | tandem affinity purification |
| trxA | gapA | tandem affinity purification |
| trxA | glmM | tandem affinity purification |
| trxA | glmU | tandem affinity purification |
| trxA | hslU | tandem affinity purification |
| trxA | hslU | tandem affinity purification |
| trxA | htpG | tandem affinity purification |
| trxA | htpG | tandem affinity purification |
| trxA | icd  | tandem affinity purification |
| trxA | icd  | tandem affinity purification |
| trxA | katG | tandem affinity purification |
| trxA | tdk  | tandem affinity purification |
| trxA | pykA | tandem affinity purification |
| trxA | lamB | tandem affinity purification |
| trxA | lptB | tandem affinity purification |
| trxA | malE | tandem affinity purification |

|      |      |                              |
|------|------|------------------------------|
| trxA | mgIA | tandem affinity purification |
| trxA | mgIA | tandem affinity purification |
| trxA | mgo  | tandem affinity purification |
| trxA | mgo  | tandem affinity purification |
| trxA | mreB | tandem affinity purification |
| trxA | ndk  | tandem affinity purification |
| trxA | nrdD | tandem affinity purification |
| trxA | nrdR | tandem affinity purification |
| trxA | nusG | tandem affinity purification |
| trxA | nusG | tandem affinity purification |
| trxA | obgE | tandem affinity purification |
| trxA | ompA | tandem affinity purification |
| trxA | ompC | tandem affinity purification |
| trxA | ompF | tandem affinity purification |
| trxA | ompR | tandem affinity purification |
| trxA | prc  | tandem affinity purification |
| trxA | crr  | tandem affinity purification |
| trxA | crr  | tandem affinity purification |
| trxA | putA | tandem affinity purification |
| trxA | pyrH | tandem affinity purification |
| trxA | rbsB | tandem affinity purification |
| trxA | rcsB | tandem affinity purification |
| trxA | rcsB | tandem affinity purification |
| trxA | recA | tandem affinity purification |
| trxA | recA | tandem affinity purification |
| trxA | nrdA | tandem affinity purification |
| trxA | rpoZ | tandem affinity purification |
| trxA | rpoZ | tandem affinity purification |
| trxA | sdaB | tandem affinity purification |
| trxA | slyD | tandem affinity purification |
| trxA | slyD | tandem affinity purification |
| trxA | sodA | tandem affinity purification |
| trxA | ffh  | tandem affinity purification |
| trxA | ffh  | tandem affinity purification |
| trxA | sthA | tandem affinity purification |
| trxA | sthA | tandem affinity purification |
| trxA | sucC | tandem affinity purification |
| trxA | sucC | tandem affinity purification |
| trxA | sucD | tandem affinity purification |
| trxA | sucD | tandem affinity purification |
| trxA | talB | tandem affinity purification |
| trxA | tnaA | tandem affinity purification |
| trxA | tpiA | tandem affinity purification |
| trxA | tpx  | tandem affinity purification |
| trxA | trxB | x-ray crystallography        |

|      |      |                              |
|------|------|------------------------------|
| trxA | ubiE | tandem affinity purification |
| trxA | udp  | tandem affinity purification |
| trxA | yajQ | tandem affinity purification |
| trxA | yajQ | tandem affinity purification |
| trxA | ybeD | tandem affinity purification |
| trxA | ybeD | tandem affinity purification |
| trxA | ydjA | tandem affinity purification |
| trxA | yebE | tandem affinity purification |
| trxA | yjiA | tandem affinity purification |
| trxA | yqaB | tandem affinity purification |

|      |      |           |
|------|------|-----------|
| thrC | fusA | pull down |
|------|------|-----------|

|     |      |           |
|-----|------|-----------|
| tig | ade  | pull down |
| tig | thrA | pull down |
| tig | argD | pull down |
| tig | asnB | pull down |
| tig | aspA | pull down |
| tig | avtA | pull down |
| tig | lacZ | pull down |
| tig | carA | pull down |
| tig | carB | pull down |
| tig | cbpA | pull down |
| tig | dadA | pull down |
| tig | lysA | pull down |
| tig | sdhA | pull down |
| tig | sdhA | pull down |
| tig | sdhB | pull down |
| tig | fabA | pull down |
| tig | fadB | pull down |
| tig | fliT | pull down |
| tig | mutM | pull down |
| tig | fruR | pull down |
| tig | ftnA | pull down |
| tig | ftsH | pull down |
| tig | gapA | pull down |
| tig | gatD | pull down |
| tig | gatZ | pull down |
| tig | gldA | pull down |
| tig | glk  | pull down |
| tig | gltJ | pull down |

|     |      |           |
|-----|------|-----------|
| tig | hisB | pull down |
| tig | htpG | pull down |
| tig | ispD | pull down |
| tig | adk  | pull down |
| tig | tdk  | pull down |
| tig | luxS | pull down |
| tig | maa  | pull down |
| tig | hybO | pull down |
| tig | mreB | pull down |
| tig | nadE | pull down |
| tig | nanK | pull down |
| tig | narY | pull down |
| tig | narZ | pull down |
| tig | nudC | pull down |
| tig | nuoE | pull down |
| tig | sucB | pull down |
| tig | aceE | pull down |
| tig | ompA | pull down |
| tig | ompA | pull down |
| tig | ompF | pull down |
| tig | mdoG | pull down |
| tig | pdxH | pull down |
| tig | pflB | pull down |
| tig | ppsA | pull down |
| tig | pstS | pull down |
| tig | gatA | pull down |
| tig | putA | pull down |
| tig | rho  | pull down |
| tig | rhcC | pull down |
| tig | rhcD | pull down |
| tig | rplA | pull down |
| tig | rplJ | pull down |
| tig | rplM | pull down |
| tig | rplN | pull down |
| tig | rplN | pull down |
| tig | rplO | pull down |
| tig | rplP | pull down |
| tig | rplQ | pull down |
| tig | rplB | pull down |
| tig | rplV | pull down |
| tig | rplW | pull down |
| tig | rpmB | pull down |
| tig | rpmB | pull down |
| tig | rpmC | pull down |
| tig | rplC | pull down |

|     |      |                                                   |
|-----|------|---------------------------------------------------|
| tig | rplC | pull down                                         |
| tig | rplD | pull down                                         |
| tig | rplD | pull down                                         |
| tig | rplE | pull down                                         |
| tig | rplF | pull down                                         |
| tig | rplF | pull down                                         |
| tig | rplL | pull down                                         |
| tig | rnc  | pull down                                         |
| tig | rpoB | pull down                                         |
| tig | rpoC | pull down                                         |
| tig | rpsA | pull down                                         |
| tig | rpsA | pull down                                         |
| tig | rpsJ | pull down                                         |
| tig | rpsK | pull down                                         |
| tig | rpsN | pull down                                         |
| tig | rpsS | pull down                                         |
| tig | rpsB | pull down                                         |
| tig | rpsB | pull down                                         |
| tig | rpsU | pull down                                         |
| tig | rpsU | pull down                                         |
| tig | rpsC | pull down                                         |
| tig | rpsC | pull down                                         |
| tig | rpsD | pull down                                         |
| tig | rpsE | pull down                                         |
| tig | rpsE | pull down                                         |
| tig | rpsE | pull down                                         |
| tig | rpsG | pull down                                         |
| tig | rpsG | pull down                                         |
| tig | rpsI | pull down                                         |
| tig | rpsI | pull down                                         |
| tig | rspA | pull down                                         |
| tig | slyD | pull down                                         |
| tig | tdcA | pull down                                         |
| tig | lacA | pull down                                         |
| tig | topA | pull down                                         |
| tig | trmA | pull down                                         |
| tig | uvrA | pull down                                         |
| tig | uxaB | comigration in non denaturing gel electrophoresis |
| tig | ycgL | pull down                                         |
| tig | yfaS | pull down                                         |
| tig | yfiF | pull down                                         |
| tig | yfiP | pull down                                         |
| tig | yiiD | pull down                                         |
| tig | yjeK | two hybrid array                                  |
| tig | yneI | pull down                                         |

tig yniB pull down

tnaA dnaK pull down

|      |      |                  |
|------|------|------------------|
| topA | hupA | pull down        |
| topA | hupB | pull down        |
| topA | lpdA | pull down        |
| topA | flgA | two hybrid array |
| topA | gabP | pull down        |
| topA | hfq  | pull down        |
| topA | hns  | pull down        |
| topA | kdgK | pull down        |
| topA | macA | pull down        |
| topA | malP | pull down        |
| topA | pssA | pull down        |
| topA | recJ | pull down        |
| topA | recQ | pull down        |
| topA | rfaL | pull down        |
| topA | rimJ | pull down        |
| topA | rluB | pull down        |
| topA | rob  | pull down        |
| topA | rpoA | pull down        |
| topA | rpoB | pull down        |
| topA | rpoC | pull down        |
| topA | rpoC | pull down        |
| topA | rpoE | two hybrid array |
| topA | rpoZ | pull down        |
| topA | rstA | pull down        |
| topA | srmB | pull down        |
| topA | alaS | pull down        |
| topA | leuS | two hybrid array |
| topA | ybiT | pull down        |
| topA | yciA | pull down        |

|     |      |           |
|-----|------|-----------|
| tpx | cysB | pull down |
| tpx | garK | pull down |

|      |      |           |
|------|------|-----------|
| treA | yhbJ | pull down |
|------|------|-----------|

|      |      |           |
|------|------|-----------|
| treC | carB | pull down |
| treC | nadE | pull down |
| treC | pdxH | pull down |
| treC | rplD | pull down |
| treC | proS | pull down |
| treC | hsdR | pull down |
| treC | yghT | pull down |

|      |      |           |
|------|------|-----------|
| treR | dnaK | pull down |
| treR | pflC | pull down |
| treR | rplB | pull down |
| treR | rpsI | pull down |
| treR | ycgL | pull down |
| treR | yciH | pull down |

|      |      |                  |
|------|------|------------------|
| trmB | groL | pull down        |
| trmB | deaD | pull down        |
| trmB | mglB | pull down        |
| trmB | lpdA | pull down        |
| trmB | dnaK | pull down        |
| trmB | flgC | two hybrid array |
| trmB | flgM | two hybrid array |
| trmB | gph  | two hybrid array |
| trmB | hrpA | pull down        |
| trmB | aceE | pull down        |
| trmB | pheA | pull down        |
| trmB | ybeZ | pull down        |
| trmB | pssA | pull down        |
| trmB | rplJ | pull down        |



|      |      |           |
|------|------|-----------|
| trmB | rplM | pull down |
| trmB | rplS | pull down |
| trmB | rplB | pull down |
| trmB | rplV | pull down |
| trmB | rplV | pull down |
| trmB | rplX | pull down |
| trmB | rplC | pull down |
| trmB | rplD | pull down |
| trmB | rplE | pull down |
| trmB | rplF | pull down |
| trmB | rplI | pull down |
| trmB | rlmL | pull down |
| trmB | rpsA | pull down |
| trmB | rpsM | pull down |
| trmB | rpsP | pull down |
| trmB | rpsB | pull down |
| trmB | rpsT | pull down |
| trmB | rpsU | pull down |
| trmB | rpsC | pull down |
| trmB | rpsD | pull down |
| trmB | rpsE | pull down |
| trmB | rpsF | pull down |
| trmB | rpsG | pull down |
| trmB | rpsG | pull down |
| trmB | srnB | pull down |
| trmB | glnS | pull down |
| trmB | ybhS | pull down |
| trmB | yfiF | pull down |
| trmB | ygiF | pull down |
| trmB | ynbC | pull down |
| trmB | yncD | pull down |
| trmH | yahl | pull down |
| trmH | rpsG | pull down |
| trmH | rpsI | pull down |
| truB | rplJ | pull down |
| truB | rplO | pull down |
| truB | rplQ | pull down |
| truB | rplB | pull down |
| truB | yggW | pull down |
| trxB | nadE | pull down |

|      |      |           |
|------|------|-----------|
| tus  | groL | pull down |
| tus  | hdhA | pull down |
| tusC | dicB | pull down |
| tusC | mpaA | pull down |
| tusC | ydfK | pull down |
| tusC | ynaE | pull down |
| tyrR | ahpF | pull down |
| tyrR | aceF | pull down |
| ubiB | aegA | pull down |
| ubiB | groL | pull down |
| ubiB | clpA | pull down |
| ubiB | crp  | pull down |
| ubiB | dnaK | pull down |
| ubiB | pspA | pull down |
| ubiB | ssb  | pull down |
| ubiB | yacL | pull down |
| ubiF | groL | pull down |
| ubiF | glpD | pull down |
| ubiF | nadE | pull down |
| ubiF | ydaC | pull down |
| udp  | fdoG | pull down |
| ulaR | groL | pull down |
| ulaR | groL | pull down |
| ulaR | groL | pull down |
| ulaR | hupB | pull down |
| ulaR | lpdA | pull down |
| ulaR | dnaJ | pull down |
| ulaR | dnaK | pull down |
| ulaR | dtpD | pull down |
| ulaR | tufA | pull down |
| ulaR | tufA | pull down |
| ulaR | lysR | pull down |
| ulaR | aceF | pull down |
| ulaR | rplA | pull down |

|      |      |           |
|------|------|-----------|
| ulaR | rplM | pull down |
| ulaR | rplN | pull down |
| ulaR | rplS | pull down |
| ulaR | rplU | pull down |
| ulaR | rplV | pull down |
| ulaR | rpmB | pull down |
| ulaR | rplC | pull down |
| ulaR | rplC | pull down |
| ulaR | rplD | pull down |
| ulaR | rplL | pull down |
| ulaR | rpsA | pull down |
| ulaR | rpsJ | pull down |
| ulaR | rpsL | pull down |
| ulaR | rpsM | pull down |
| ulaR | rpsM | pull down |
| ulaR | rpsN | pull down |
| ulaR | rpsS | pull down |
| ulaR | rpsB | pull down |
| ulaR | rpsT | pull down |
| ulaR | rpsC | pull down |
| ulaR | rpsD | pull down |
| ulaR | rpsD | pull down |
| ulaR | rpsE | pull down |
| ulaR | rpsE | pull down |
| ulaR | rpsG | pull down |
| ulaR | rpsH | pull down |
| ulaR | rpsI | pull down |
| ulaR | yagX | pull down |
| ulaR | yfgC | pull down |
| ulaR | yfhM | pull down |
| ulaR | yhaJ | pull down |
| ulaR | ynbC | pull down |

|     |      |           |
|-----|------|-----------|
| upp | lrp  | pull down |
| upp | pepD | pull down |
| upp | purN | pull down |
| upp | rplQ | pull down |

|     |      |           |
|-----|------|-----------|
| usg | cusA | pull down |
| usg | tufA | pull down |
| usg | tufA | pull down |
| usg | pykA | pull down |
| usg | nusG | pull down |

|     |      |                  |
|-----|------|------------------|
| usg | nusG | pull down        |
| usg | pgk  | blue native page |
| usg | rplL | pull down        |
| usg | rpoA | pull down        |
| usg | rpoB | pull down        |
| usg | rpoC | pull down        |
| usg | rpoC | pull down        |
| usg | rpoC | pull down        |
| usg | rpsC | pull down        |
| usg | uidR | pull down        |
| usg | ybbN | blue native page |
| usg | ygfZ | pull down        |
| usg | yibA | pull down        |
| usg | yjcC | pull down        |

|      |      |           |
|------|------|-----------|
| uspA | stpA | pull down |
| uspA | ybiA | pull down |
| uspA | yibL | pull down |

|      |      |           |
|------|------|-----------|
| uspF | cybC | pull down |
| uspF | dnaK | pull down |
| uspF | hflK | pull down |
| uspF | intB | pull down |
| uspF | matC | pull down |
| uspF | nadE | pull down |
| uspF | paaB | pull down |
| uspF | rplO | pull down |
| uspF | rplS | pull down |
| uspF | rplD | pull down |
| uspF | rplE | pull down |
| uspF | rluC | pull down |
| uspF | rpsM | pull down |
| uspF | rpsI | pull down |
| uspF | secB | pull down |
| uspF | ssuE | pull down |
| uspF | ybaO | pull down |
| uspF | ycgL | pull down |
| uspF | yfjM | pull down |

|      |      |           |
|------|------|-----------|
| uspG | ahpF | pull down |
| uspG | atpA | pull down |

|      |      |                                 |
|------|------|---------------------------------|
| uspG | lacZ | pull down                       |
| uspG | carA | pull down                       |
| uspG | groL | anti bait coimmunoprecipitation |
| uspG | groL | pull down                       |
| uspG | groL | pull down                       |
| uspG | dadA | pull down                       |
| uspG | sdhA | pull down                       |
| uspG | dnaJ | pull down                       |
| uspG | dnaJ | pull down                       |
| uspG | dnaK | pull down                       |
| uspG | dnaK | pull down                       |
| uspG | dnaE | pull down                       |
| uspG | tufA | pull down                       |
| uspG | glpD | pull down                       |
| uspG | hldD | pull down                       |
| uspG | mukB | pull down                       |
| uspG | ppsA | pull down                       |
| uspG | putA | pull down                       |
| uspG | rplW | pull down                       |
| uspG | rplL | pull down                       |
| uspG | rpoB | pull down                       |
| uspG | rpoC | pull down                       |
| uspG | secA | pull down                       |
| uspG | secB | pull down                       |
| uspG | xylA | pull down                       |
| uspG | ycaO | pull down                       |
| uup  | aldA | pull down                       |
| uup  | nadE | pull down                       |
| uup  | lysS | pull down                       |
| uup  | yaiP | pull down                       |
| uup  | ydaY | pull down                       |
| uup  | yecC | pull down                       |
| uup  | yeiT | pull down                       |
| uvrA | dnaK | pull down                       |
| uvrA | narG | pull down                       |
| uvrA | narZ | pull down                       |
| uvrC | cspC | pull down                       |
| uvrC | hupA | pull down                       |
| uvrC | ddpA | pull down                       |
| uvrC | lpdA | pull down                       |
| uvrC | lpdA | pull down                       |
| uvrC | glnK | pull down                       |

|      |      |           |
|------|------|-----------|
| uvrC | sucA | pull down |
| uvrC | sucB | pull down |
| uvrC | aceE | pull down |
| uvrC | pntA | pull down |
| uvrC | rplA | pull down |
| uvrC | rplA | pull down |
| uvrC | rplM | pull down |
| uvrC | rplN | pull down |
| uvrC | rplS | pull down |
| uvrC | rplB | pull down |
| uvrC | rplB | pull down |
| uvrC | rplT | pull down |
| uvrC | rplU | pull down |
| uvrC | rplV | pull down |
| uvrC | rplY | pull down |
| uvrC | rpmB | pull down |
| uvrC | rplC | pull down |
| uvrC | rplC | pull down |
| uvrC | rplD | pull down |
| uvrC | rplI | pull down |
| uvrC | rpsA | pull down |
| uvrC | rpsJ | pull down |
| uvrC | rpsK | pull down |
| uvrC | rpsL | pull down |
| uvrC | rpsM | pull down |
| uvrC | rpsM | pull down |
| uvrC | rpsN | pull down |
| uvrC | rpsO | pull down |
| uvrC | rpsR | pull down |
| uvrC | rpsS | pull down |
| uvrC | rpsB | pull down |
| uvrC | rpsT | pull down |
| uvrC | rpsC | pull down |
| uvrC | rpsC | pull down |
| uvrC | rpsD | pull down |
| uvrC | rpsD | pull down |
| uvrC | rpsE | pull down |
| uvrC | rpsF | pull down |
| uvrC | rpsG | pull down |
| uvrC | rpsG | pull down |
| uvrC | rpsH | pull down |
| uvrC | yfgF | pull down |
| uvrC | yfiB | pull down |
| uvrC | yfiF | pull down |
| uvrC | yhbY | pull down |

|      |      |                  |
|------|------|------------------|
| uvrC | yjeF | pull down        |
| uxuB | nadE | pull down        |
| uxuB | phoR | pull down        |
|      |      |                  |
| wrbA | nikD | pull down        |
| wrbA | phoP | pull down        |
| xerD | acpP | pull down        |
| xerD | prs  | pull down        |
| xerD | mukB | pull down        |
| xerD | rplQ | pull down        |
| xerD | rpsI | pull down        |
| xerD | ytfN | pull down        |
| gpt  | bIc  | pull down        |
| yadG | groL | pull down        |
| yadG | glpD | pull down        |
|      |      |                  |
| yaeT | damX | blue native page |
| yafC | ppk  | pull down        |
| yagI | lacZ | pull down        |
| yagI | btuD | pull down        |
| yagI | fdnG | pull down        |
| yagI | puuE | pull down        |
| yagI | yjJK | pull down        |
| yagL | dnaK | pull down        |
| yagL | rpsT | pull down        |
| yagL | slyD | pull down        |

|      |      |                  |
|------|------|------------------|
| yahA | dapD | pull down        |
| yahA | rplA | pull down        |
| yahA | rpsI | pull down        |
| yahK | mukB | pull down        |
| yahK | nadE | pull down        |
| yahK | napC | pull down        |
| yahK | rplQ | pull down        |
| yahK | ybaA | pull down        |
| yaiL | nadE | pull down        |
| yaiL | tatE | pull down        |
| yaiL | wbbJ | pull down        |
| yajC | yajC | blue native page |
| yajQ | dnaN | pull down        |
| ybaB | deaD | pull down        |
| ybaB | inaA | pull down        |
| ybaB | intB | pull down        |
| ybaB | nadE | pull down        |
| ybaB | rplT | pull down        |
| ybaB | wzxC | pull down        |
| ybaB | ychN | pull down        |
| ybcD | adrB | pull down        |
| ybcH | atpA | pull down        |
| ybcH | groL | pull down        |
| ybcH | trpE | pull down        |
| ybcH | yghR | pull down        |
| ybcM | groL | pull down        |
| ybcM | cysI | pull down        |
| ybcM | fur  | pull down        |
| ybcM | nrdI | pull down        |
| ybcM | rplJ | pull down        |
| ybcM | rplQ | pull down        |
| ybcM | rpmB | pull down        |
| ybcM | rpsR | pull down        |
| ybcM | sapA | pull down        |



|      |      |                                    |
|------|------|------------------------------------|
| ybcM | sapF | pull down                          |
| ybcM | yciN | pull down                          |
| ybeD | clpX | pull down                          |
| ybeD | tufA | pull down                          |
| ybeD | fur  | pull down                          |
| ybeD | nadE | pull down                          |
| ybeD | rpoB | pull down                          |
| ybeD | rpoC | pull down                          |
| ybeD | yrfB | pull down                          |
| ybgC | acpP | tandem affinity purification       |
| ybgC | espP | tandem affinity purification       |
| ybgC | espP | affinity chromatography technology |
| ybgC | espP | tandem affinity purification       |
| ybgC | plsB | tandem affinity purification       |
| ybgC | plsB | tandem affinity purification       |
| ybgC | plsX | tandem affinity purification       |
| ybgC | rplB | pull down                          |
| ybgC | rplW | pull down                          |
| ybgC | rplC | pull down                          |
| ybgC | rpsD | pull down                          |
| ybgC | secA | tandem affinity purification       |
| ybgC | secA | tandem affinity purification       |
| ybgC | spoT | tandem affinity purification       |
| ybgC | ynbC | pull down                          |
| ybgl | arcA | pull down                          |
| ybgl | stpA | pull down                          |
| ybgl | yqeI | pull down                          |
| ybgl | yqhD | blue native page                   |
| ybgl | zapA | pull down                          |
| ybgJ | groL | pull down                          |
| ybgJ | zwf  | pull down                          |
| ybgJ | agaD | pull down                          |
| ybgK | groL | pull down                          |
| ybgK | nei  | pull down                          |
| ybgK | guaA | pull down                          |
| ybgK | yhhI | pull down                          |

|      |      |           |
|------|------|-----------|
| ybiS | dnaK | pull down |
| ybiS | htpG | pull down |
| ybjD | lon  | pull down |
| ybjD | rplB | pull down |
| ybjD | yegW | pull down |
| ybjQ | hldD | pull down |
| ybjX | appY | pull down |
| ybjX | groL | pull down |
| ybjX | hupA | pull down |
| ybjX | hupB | pull down |
| ybjX | lpdA | pull down |
| ybjX | dnaJ | pull down |
| ybjX | tufA | pull down |
| ybjX | tufA | pull down |
| ybjX | hldD | pull down |
| ybjX | mutH | pull down |
| ybjX | aceF | pull down |
| ybjX | perM | pull down |
| ybjX | pssA | pull down |
| ybjX | rplA | pull down |
| ybjX | rplA | pull down |
| ybjX | rplJ | pull down |
| ybjX | rplM | pull down |
| ybjX | rplM | pull down |
| ybjX | rplO | pull down |
| ybjX | rplQ | pull down |
| ybjX | rplS | pull down |
| ybjX | rplB | pull down |
| ybjX | rplB | pull down |
| ybjX | rplB | pull down |
| ybjX | rplT | pull down |
| ybjX | rplU | pull down |
| ybjX | rplV | pull down |
| ybjX | rplX | pull down |
| ybjX | rpmB | pull down |

|      |      |           |
|------|------|-----------|
| ybjX | rpmC | pull down |
| ybjX | rplC | pull down |
| ybjX | rplC | pull down |
| ybjX | rpmG | pull down |
| ybjX | rplD | pull down |
| ybjX | rplD | pull down |
| ybjX | rplE | pull down |
| ybjX | rplE | pull down |
| ybjX | rplF | pull down |
| ybjX | rplF | pull down |
| ybjX | rplL | pull down |
| ybjX | rplI | pull down |
| ybjX | rluB | pull down |
| ybjX | rnR  | pull down |
| ybjX | rpoC | pull down |
| ybjX | rpsA | pull down |
| ybjX | rpsA | pull down |
| ybjX | rpsM | pull down |
| ybjX | rpsS | pull down |
| ybjX | rpsB | pull down |
| ybjX | rpsB | pull down |
| ybjX | rpsT | pull down |
| ybjX | rpsC | pull down |
| ybjX | rpsC | pull down |
| ybjX | rpsD | pull down |
| ybjX | rpsE | pull down |
| ybjX | rpsF | pull down |
| ybjX | rpsG | pull down |
| ybjX | rpsG | pull down |
| ybjX | srmB | pull down |
| ybjX | yciH | pull down |
|      |      |           |
| ycaC | putA | pull down |
| ycaC | tatE | pull down |
|      |      |           |
| ycaO | alsA | pull down |
| ycaO | rpmC | pull down |
|      |      |           |
| ycbB | sucB | pull down |
|      |      |           |
| ycbG | pflA | pull down |
| ycbG | rplA | pull down |
| ycbG | rplB | pull down |
| ycbG | rpsE | pull down |
| ycbG | ulaF | pull down |

|      |      |           |
|------|------|-----------|
| ycbG | ycgE | pull down |
| ycbL | fliM | pull down |
| ycbL | sucA | pull down |
| ycbL | yahJ | pull down |
| ycbU | rplL | pull down |
| yceD | djlA | pull down |
| yceD | hns  | pull down |
| yceD | mukB | pull down |
| yceD | pepD | pull down |
| yceD | rplQ | pull down |
| yceD | rplE | pull down |
| yceD | rplF | pull down |
| yceD | rpsJ | pull down |
| yceD | rpsC | pull down |
| yceD | rpsI | pull down |
| ycfD | prs  | pull down |
| ycfD | nuoE | pull down |
| ycfD | panC | pull down |
| ycfD | pflB | pull down |
| ycfD | rplP | pull down |
| ycfD | rplQ | pull down |
| ycfD | rplB | pull down |
| ycfD | rlmH | pull down |
| ycfD | rpsC | pull down |
| ycfD | rpsI | pull down |
| ycfD | ydfK | pull down |
| ycfD | ynaE | pull down |
| ycgB | groL | pull down |
| ycgB | greB | pull down |
| ycgB | rplB | pull down |
| ycgB | uvrY | pull down |

|      |       |           |
|------|-------|-----------|
| ychJ | groL  | pull down |
| ychJ | crl   | pull down |
| ychJ | fdnG  | pull down |
| ychJ | hns   | pull down |
| ychJ | hyfB  | pull down |
| ychJ | hyfR  | pull down |
| ychJ | insN1 | pull down |
| ychJ | ispG  | pull down |
| ychJ | minD  | pull down |
| ychJ | mngB  | pull down |
| ychJ | narZ  | pull down |
| ychJ | nrdI  | pull down |
| ychJ | pyrD  | pull down |
| ychJ | rplA  | pull down |
| ychJ | rplB  | pull down |
| ychJ | rplD  | pull down |
| ychJ | rplE  | pull down |
| ychJ | rpsB  | pull down |
| ychJ | rpsC  | pull down |
| ychJ | rpsD  | pull down |
| ychJ | rpsI  | pull down |
| ychJ | rspA  | pull down |
| ychJ | slyD  | pull down |
| ychJ | thil  | pull down |
| ychJ | ybaQ  | pull down |
| ychJ | yggR  | pull down |
| ychJ |       |           |
| yciU | lepA  | pull down |
| yciU | aceE  | pull down |
| yciU | aceE  | pull down |
| yciU | aceF  | pull down |
| yciU | rplQ  | pull down |
| yciU | rpsJ  | pull down |
| yciU |       |           |
| ycjW | sdhA  | pull down |
| ycjW | nadE  | pull down |
| ycjW | yfjJ  | pull down |
| ycjW |       |           |
| ycjZ | prs   | pull down |

|      |      |           |
|------|------|-----------|
| ycjZ | rplB | pull down |
| ycjZ | rlmA | pull down |
| ycjZ | rpsB | pull down |
| ycjZ | yegV | pull down |

|      |      |           |
|------|------|-----------|
| ydaE | alpA | pull down |
| ydaE | nadE | pull down |
| ydaE | rplB | pull down |
| ydaE | rsuA | pull down |

|      |      |           |
|------|------|-----------|
| ydaY | dnaK | pull down |
| ydaY | nadE | pull down |
| ydaY | rplF | pull down |

|      |      |           |
|------|------|-----------|
| ydcR | groL | pull down |
|------|------|-----------|

|      |      |           |
|------|------|-----------|
| yddE | gltB | pull down |
| yddE | mfd  | pull down |
| yddE | nadE | pull down |
| yddE | rpoB | pull down |
| yddE | yfhM | pull down |

|      |      |           |
|------|------|-----------|
| ydfG | acrB | pull down |
| ydfG | ahpF | pull down |
| ydfG | lacZ | pull down |
| ydfG | groL | pull down |
| ydfG | nadE | pull down |
| ydfG | fruA | pull down |
| ydfG | rhsA | pull down |

|      |      |           |
|------|------|-----------|
| ydfZ | lacZ | pull down |
| ydfZ | mngB | pull down |
| ydfZ | nadE | pull down |

|      |      |           |
|------|------|-----------|
| ydfZ | napC | pull down |
| ydfZ | pepD | pull down |
| ydfZ | pflB | pull down |
| ydfZ | pqqL | pull down |
| ydfZ | ybdD | pull down |
| ydfZ | ykgF | pull down |

|      |      |           |
|------|------|-----------|
| ydhQ | dnaK | pull down |
| ydhQ | fusA | pull down |
| ydhQ | idnO | pull down |
| ydhQ | motB | pull down |
| ydhQ | nadE | pull down |
| ydhQ | ndk  | pull down |
| ydhQ | nfrB | pull down |
| ydhQ | rfaJ | pull down |
| ydhQ | rplA | pull down |
| ydhQ | rplK | pull down |
| ydhQ | rplN | pull down |
| ydhQ | rpsB | pull down |
| ydhQ | uup  | pull down |
| ydhQ | yciH | pull down |

|      |      |           |
|------|------|-----------|
| ydhR | dnaK | pull down |
| ydhR | dnaK | pull down |
| ydhR | dnaN | pull down |

|      |      |           |
|------|------|-----------|
| ydiH | tufA | pull down |
| ydiH | hldD | pull down |
| ydiH | rfaF | pull down |
| ydiH | rpsC | pull down |
| ydiH | rpsE | pull down |
| ydiH | rpsG | pull down |
| ydiH | spoT | pull down |
| ydiH | tig  | pull down |
| ydiH | ynbC | pull down |

|      |      |           |
|------|------|-----------|
| ydjA | artI | pull down |
| ydjA | cmoA | pull down |
| ydjA | dnaK | pull down |

|      |      |           |
|------|------|-----------|
| ydjA | lacI | pull down |
| ydjA | yehH | pull down |
| ydjA | recT | pull down |
| ydjA | rpsD | pull down |
| ydjA | rsuA | pull down |
| ydjA | yhaJ | pull down |

|      |      |           |
|------|------|-----------|
| ydjF | lpdA | pull down |
| ydjF | dnaK | pull down |
| ydjF | hns  | pull down |
| ydjF | hslU | pull down |
| ydjF | prs  | pull down |
| ydjF | lon  | pull down |
| ydjF | mreB | pull down |
| ydjF | sucB | pull down |
| ydjF | recA | pull down |
| ydjF | rplN | pull down |
| ydjF | rob  | pull down |
| ydjF | rpsD | pull down |
| ydjF | aspS | pull down |
| ydjF | umuC | pull down |

|      |      |           |
|------|------|-----------|
| yeaD | nadE | pull down |
| yeaD | yhcA | pull down |

|      |      |           |
|------|------|-----------|
| yeaG | dgt  | pull down |
| yeaG | dnaN | pull down |
| yeaG | intR | pull down |
| yeaG | nadE | pull down |

|      |      |           |
|------|------|-----------|
| yeaK | ycjG | pull down |
| yeaK | groL | pull down |
| yeaK | iscS | pull down |
| yeaK | prs  | pull down |
| yeaK | mreB | pull down |
| yeaK | nadE | pull down |
| yeaK | pepD | pull down |
| yeaK | rsuA | pull down |
| yeaK | sohB | pull down |
| yeaK | tdh  | pull down |
| yeaK | yahG | pull down |

|      |     |           |
|------|-----|-----------|
| yeaZ | ada | pull down |
|------|-----|-----------|



|      |      |           |
|------|------|-----------|
| yeaZ | aroK | pull down |
| yeaZ | dmlR | pull down |
| yeaZ | fixB | pull down |
| yeaZ | gcp  | pull down |
| yeaZ | thiH | pull down |
| yeaZ | ugpB | pull down |
| yeaZ | ygck | pull down |
| yeaZ | yjgR | pull down |

|      |      |           |
|------|------|-----------|
| yebC | cybC | pull down |
| yebC | def  | pull down |
| yebC | hdeD | pull down |
| yebC | prs  | pull down |
| yebC | nadE | pull down |
| yebC | napC | pull down |
| yebC | purR | pull down |
| yebC | puuE | pull down |
| yebC | rplQ | pull down |
| yebC | rpsN | pull down |
| yebC | rpsI | pull down |
| yebC | slyB | pull down |
| yebC | slyD | pull down |
| yebC | stpA | pull down |
| yebC | argS | pull down |
| yebC | sseA | pull down |

|      |      |           |
|------|------|-----------|
| yecC | groL | pull down |
| yecC | fur  | pull down |
| yecC | rpsE | pull down |

|      |      |           |
|------|------|-----------|
| yedN | dnaK | pull down |
| yedN | nadE | pull down |
| yedN | phoB | pull down |

|      |      |           |
|------|------|-----------|
| yefG | groL | pull down |
| yefG | ypfG | pull down |

|      |      |                  |
|------|------|------------------|
| yeiT | yeiA | blue native page |
|------|------|------------------|

|      |      |           |
|------|------|-----------|
| yejA | groL | pull down |
| yejA | secA | pull down |

|      |      |           |
|------|------|-----------|
| yfaA | groL | pull down |
| yfaA | sdhA | pull down |
| yfaA | gltD | pull down |
| yfaA | rplB | pull down |
| yfaA | ybcK | pull down |

|      |      |           |
|------|------|-----------|
| yfcB | dnaK | pull down |
| yfcB | mcbR | pull down |
| yfcB | rplC | pull down |
| yfcB | rplC | pull down |
| yfcB | rpsJ | pull down |
| yfcB | stfR | pull down |
| yfcB | tig  | pull down |
| yfcB | tig  | pull down |

|      |      |           |
|------|------|-----------|
| yfcZ | glcB | pull down |
| yfcZ | pflB | pull down |
| yfcZ | rplP | pull down |
| yfcZ | rplB | pull down |
| yfcZ | rpsC | pull down |
| yfcZ | ulaF | pull down |

yfgM                      rcsB                      blue native page

|      |      |           |
|------|------|-----------|
| yfiF | dacA | pull down |
| yfiF | hupA | pull down |
| yfiF | deaD | pull down |
| yfiF | greB | pull down |
| yfiF | holB | pull down |
| yfiF | hybD | pull down |
| yfiF | ihfA | pull down |
| yfiF | osmF | pull down |
| yfiF | pssA | pull down |
| yfiF | rplA | pull down |
| yfiF | rplA | pull down |
| yfiF | rplP | pull down |
| yfiF | rplQ | pull down |
| yfiF | rplR | pull down |
| yfiF | rplB | pull down |
| yfiF | rplB | pull down |
| yfiF | rplB | pull down |
| yfiF | rplT | pull down |
| yfiF | rplV | pull down |
| yfiF | rplC | pull down |
| yfiF | rplC | pull down |
| yfiF | rplF | pull down |
| yfiF | rplI | pull down |
| yfiF | rlmL | pull down |
| yfiF | rluB | pull down |
| yfiF | rluC | pull down |
| yfiF | rnR  | pull down |
| yfiF | rpsK | pull down |
| yfiF | rpsL | pull down |
| yfiF | rpsM | pull down |
| yfiF | rpsM | pull down |
| yfiF | rpsN | pull down |
| yfiF | rpsO | pull down |
| yfiF | rpsP | pull down |
| yfiF | rpsR | pull down |

|      |      |           |
|------|------|-----------|
| yfiF | rpsS | pull down |
| yfiF | rpsT | pull down |
| yfiF | rpsU | pull down |
| yfiF | rpsC | pull down |
| yfiF | rpsD | pull down |
| yfiF | rpsD | pull down |
| yfiF | rpsD | pull down |
| yfiF | rpsE | pull down |
| yfiF | rpsE | pull down |
| yfiF | rpsF | pull down |
| yfiF | rpsF | pull down |
| yfiF | rpsG | pull down |
| yfiF | rpsG | pull down |
| yfiF | rpsH | pull down |
| yfiF | sufC | pull down |
| yfiF | ybgP | pull down |
| yfiF | yfhM | pull down |

|      |      |           |
|------|------|-----------|
| ygeY | lptD | pull down |
| ygeY | metC | pull down |
| ygeY | puuB | pull down |
| ygeY | uxuA | pull down |

|      |      |           |
|------|------|-----------|
| ygfZ | nadE | pull down |
| ygfZ | rplT | pull down |
| ygfZ | yfdE | pull down |
| ygfZ | yibL | pull down |

|      |      |           |
|------|------|-----------|
| yghA | dnaK | pull down |
|------|------|-----------|

|      |      |           |
|------|------|-----------|
| yghA | dnaN | pull down |
| yghA | lldR | pull down |
| yghA | yjiE | pull down |

|      |      |           |
|------|------|-----------|
| ygiN | nadE | pull down |
|------|------|-----------|

|      |      |           |
|------|------|-----------|
| yhbS | cybC | pull down |
| yhbS | rplQ | pull down |
| yhbS | rplS | pull down |
| yhbS | rplB | pull down |
| yhbS | rpsI | pull down |
| yhbS | yhbT | pull down |
| yhbS | yjbD | pull down |

|      |      |           |
|------|------|-----------|
| yhdE | pepD | pull down |
| yhdE | qseC | pull down |

|      |      |           |
|------|------|-----------|
| yheT | groL | pull down |
| yheT | rpsT | pull down |

|      |      |           |
|------|------|-----------|
| yhgF | dnaC | pull down |
| yhgF | gltX | pull down |

|      |      |           |
|------|------|-----------|
| yhhK | yafL | pull down |
|------|------|-----------|

|      |      |           |
|------|------|-----------|
| yiaG | ygaC | pull down |
| yiaG | yibL | pull down |

|      |      |           |
|------|------|-----------|
| yibA | dnaK | pull down |
| yibA | priA | pull down |
| yibA | rpsB | pull down |
| yibA | uup  | pull down |

|      |      |           |
|------|------|-----------|
| yibF | lacZ | pull down |
|------|------|-----------|

|      |      |           |
|------|------|-----------|
| yieF | uxaA | pull down |
| yieF | yniC | pull down |

|      |      |           |
|------|------|-----------|
| yihT | ahpC | pull down |
| yihT | def  | pull down |
| yihT | fhuC | pull down |
| yihT | nadE | pull down |
| yihT | smtA | pull down |

|      |      |           |
|------|------|-----------|
| yiiS | hyaC | pull down |
| yiiS | glpD | pull down |
| yiiS | greA | pull down |
| yiiS | hns  | pull down |
| yiiS | iscA | pull down |
| yiiS | glcB | pull down |
| yiiS | nadE | pull down |
| yiiS | paaB | pull down |
| yiiS | pflB | pull down |
| yiiS | phoB | pull down |
| yiiS | rhaM | pull down |
| yiiS | rplD | pull down |
| yiiS | rplF | pull down |
| yiiS | rpsM | pull down |
| yiiS | rpsB | pull down |
| yiiS | rpsT | pull down |

|      |      |           |
|------|------|-----------|
| yiiS | rpsE | pull down |
| yiiS | ubiB | pull down |
| yiiS | uspD | pull down |
| yiiS | yciN | pull down |
| yiiS | yhjB | pull down |
| yiiS | yqfE | pull down |
| yiiS | zapB | pull down |

|      |      |           |
|------|------|-----------|
| yjbR | purC | pull down |
|------|------|-----------|

|      |      |           |
|------|------|-----------|
| yjeE | groL | pull down |
| yjeE | gadB | pull down |
| yjeE | dnaK | pull down |
| yjeE | gapA | pull down |
| yjeE | metE | pull down |
| yjeE | nadE | pull down |
| yjeE | paaB | pull down |
| yjeE | paal | pull down |
| yjeE | pflB | pull down |
| yjeE | purA | pull down |
| yjeE | rplN | pull down |
| yjeE | rplL | pull down |
| yjeE | rpsA | pull down |
| yjeE | rpsB | pull down |
| yjeE | rpsC | pull down |
| yjeE | rpsD | pull down |
| yjeE | rpsE | pull down |
| yjeE | yiiD | pull down |
| yjeE | yjeF | pull down |
| yjeE | yjeN | pull down |

|      |      |           |
|------|------|-----------|
| yjeF | lpdA | pull down |
| yjeF | lpdA | pull down |
| yjeF | mraZ | pull down |
| yjeF | mraZ | pull down |
| yjeF | aceF | pull down |
| yjeF | aceF | pull down |
| yjeF | rhcC | pull down |
| yjeF | yfhM | pull down |
| yjeF | yjeE | pull down |

|      |      |           |
|------|------|-----------|
| yjgD | lpdA | pull down |
| yjgD | friA | pull down |
| yjgD | gshA | pull down |
| yjgD | guaC | pull down |
| yjgD | mpl  | pull down |
| yjgD | aceF | pull down |
| yjgD | yniC | pull down |

|      |      |           |
|------|------|-----------|
| yjiE | groL | pull down |
|------|------|-----------|

|      |      |           |
|------|------|-----------|
| yjjI | dnaK | pull down |
|------|------|-----------|

|      |      |           |
|------|------|-----------|
| yjjK | nadE | pull down |
|------|------|-----------|

|      |      |                  |
|------|------|------------------|
| yncE | cheW | two hybrid array |
|------|------|------------------|



|      |      |           |
|------|------|-----------|
| yqgE | fur  | pull down |
| yqgE | matC | pull down |
| yqgE | nuoG | pull down |
| yqgE | pepD | pull down |
| yqgE | rplO | pull down |
| yqgE | rplB | pull down |
| yqgE | rpsB | pull down |
| yqgE | rsmE | pull down |
| yqgE | ydbH | pull down |

|      |      |           |
|------|------|-----------|
| yqhD | glpD | pull down |
| yqhD | slyD | pull down |

|      |      |           |
|------|------|-----------|
| yqiK | caiC | pull down |
| yqiK | rspA | pull down |
| yqiK | ylbE | pull down |
| yqiK | yphF | pull down |

|      |      |           |
|------|------|-----------|
| yqjI | hisJ | pull down |
| yqjI | ompR | pull down |

|      |      |           |
|------|------|-----------|
| ytfM | groL | pull down |
|------|------|-----------|

zapA  
zapA  
zapA

caiD  
lpxA  
thyA

pull down  
pull down  
pull down















|                       |                           |
|-----------------------|---------------------------|
| Butland et al. (2005) | 15690043 Escherichia coli |
| Butland et al. (2005) | 15690043 Escherichia coli |
| Butland et al. (2005) | 15690043 Escherichia coli |
| Butland et al. (2005) | 15690043 Escherichia coli |
| Butland et al. (2005) | 15690043 Escherichia coli |
| Butland et al. (2005) | 15690043 Escherichia coli |
| Butland et al. (2005) | 15690043 Escherichia coli |
| Butland et al. (2005) | 15690043 Escherichia coli |
| Butland et al. (2005) | 15690043 Escherichia coli |
| Butland et al. (2005) | 15690043 Escherichia coli |

|                           |                           |
|---------------------------|---------------------------|
| Butland et al. (2005)     | 15690043 Escherichia coli |
| Butland et al. (2005)     | 15690043 Escherichia coli |
| Arifuzzaman et al. (2006) | 16606699 Escherichia coli |
| Arifuzzaman et al. (2006) | 16606699 Escherichia coli |

|                           |                           |
|---------------------------|---------------------------|
| Arifuzzaman et al. (2006) | 16606699 Escherichia coli |
| Arifuzzaman et al. (2006) | 16606699 Escherichia coli |
| Arifuzzaman et al. (2006) | 16606699 Escherichia coli |

|                           |                           |
|---------------------------|---------------------------|
| Arifuzzaman et al. (2006) | 16606699 Escherichia coli |
|---------------------------|---------------------------|

|                           |                           |
|---------------------------|---------------------------|
| Arifuzzaman et al. (2006) | 16606699 Escherichia coli |
| Arifuzzaman et al. (2006) | 16606699 Escherichia coli |
| Arifuzzaman et al. (2006) | 16606699 Escherichia coli |

|                           |                           |
|---------------------------|---------------------------|
| Arifuzzaman et al. (2006) | 16606699 Escherichia coli |
| Butland et al. (2005)     | 15690043 Escherichia coli |
| Arifuzzaman et al. (2006) | 16606699 Escherichia coli |

|                           |                           |
|---------------------------|---------------------------|
| Arifuzzaman et al. (2006) | 16606699 Escherichia coli |
| Arifuzzaman et al. (2006) | 16606699 Escherichia coli |
| Arifuzzaman et al. (2006) | 16606699 Escherichia coli |

|                           |                           |
|---------------------------|---------------------------|
| Arifuzzaman et al. (2006) | 16606699 Escherichia coli |
| Arifuzzaman et al. (2006) | 16606699 Escherichia coli |
| Arifuzzaman et al. (2006) | 16606699 Escherichia coli |
| Arifuzzaman et al. (2006) | 16606699 Escherichia coli |
| Lasserre et al. (2006)    | 16858726 Escherichia coli |
| Butland et al. (2005)     | 15690043 Escherichia coli |
| Huang et al. (2006)       | 17137328 Escherichia coli |
| Huang et al. (2006)       | 17137328 Escherichia coli |
| Stenberg et al. (2005)    | 16079137 Escherichia coli |
| Stenberg et al. (2005)    | 16079137 Escherichia coli |
| Lasserre et al. (2006)    | 16858726 Escherichia coli |
| Stenberg et al. (2005)    | 16079137 Escherichia coli |
| Stenberg et al. (2005)    | 16079137 Escherichia coli |
| Huang et al. (2006)       | 17137328 Escherichia coli |
| Huang et al. (2006)       | 17137328 Escherichia coli |
| Arifuzzaman et al. (2006) | 16606699 Escherichia coli |
| Arifuzzaman et al. (2006) | 16606699 Escherichia coli |
| Huang et al. (2006)       | 17137328 Escherichia coli |
| Huang et al. (2006)       | 17137328 Escherichia coli |
| Huang et al. (2006)       | 17137328 Escherichia coli |
| Huang et al. (2006)       | 17137328 Escherichia coli |
| Arifuzzaman et al. (2006) | 16606699 Escherichia coli |
| Lasserre et al. (2006)    | 16858726 Escherichia coli |
| Arifuzzaman et al. (2006) | 16606699 Escherichia coli |
| Arifuzzaman et al. (2006) | 16606699 Escherichia coli |
| Arifuzzaman et al. (2006) | 16606699 Escherichia coli |
| Arifuzzaman et al. (2006) | 16606699 Escherichia coli |
| Arifuzzaman et al. (2006) | 16606699 Escherichia coli |
| Arifuzzaman et al. (2006) | 16606699 Escherichia coli |
| Arifuzzaman et al. (2006) | 16606699 Escherichia coli |
| Arifuzzaman et al. (2006) | 16606699 Escherichia coli |
| Butland et al. (2005)     | 15690043 Escherichia coli |
| Butland et al. (2005)     | 15690043 Escherichia coli |
| Butland et al. (2005)     | 15690043 Escherichia coli |
| Butland et al. (2005)     | 15690043 Escherichia coli |
| Butland et al. (2005)     | 15690043 Escherichia coli |







|                           |          |                  |
|---------------------------|----------|------------------|
| Butland et al. (2005)     | 15690043 | Escherichia coli |
| Butland et al. (2005)     | 15690043 | Escherichia coli |
| Butland et al. (2005)     | 15690043 | Escherichia coli |
| Butland et al. (2005)     | 15690043 | Escherichia coli |
| Butland et al. (2005)     | 15690043 | Escherichia coli |
| Butland et al. (2005)     | 15690043 | Escherichia coli |
| Butland et al. (2005)     | 15690043 | Escherichia coli |
| Arifuzzaman et al. (2006) | 16606699 | Escherichia coli |
| Butland et al. (2005)     | 15690043 | Escherichia coli |

|                           |          |                  |
|---------------------------|----------|------------------|
| Arifuzzaman et al. (2006) | 16606699 | Escherichia coli |
| Arifuzzaman et al. (2006) | 16606699 | Escherichia coli |

|                      |          |                  |
|----------------------|----------|------------------|
| Yajima et al. (2004) | 15336558 | Escherichia coli |
|----------------------|----------|------------------|

|                           |          |                  |
|---------------------------|----------|------------------|
| Arifuzzaman et al. (2006) | 16606699 | Escherichia coli |
|---------------------------|----------|------------------|

|                               |               |                  |
|-------------------------------|---------------|------------------|
| Butland et al. (2005)         | 15690043      | Escherichia coli |
| Butland et al. (2005)         | 15690043      | Escherichia coli |
| Butland et al. (2005)         | 15690043      | Escherichia coli |
| Butland et al. (2005)         | 15690043      | Escherichia coli |
| Koike-Takeshita et al. (2006) | imex:IM-14417 | Escherichia coli |
| Butland et al. (2005)         | 15690043      | Escherichia coli |
| Butland et al. (2005)         | 15690043      | Escherichia coli |
| Butland et al. (2005)         | 15690043      | Escherichia coli |
| Sharma et al. (2008)          | imex:IM-11954 | Escherichia coli |
| Sharma et al. (2008)          | imex:IM-11954 | Escherichia coli |
| Arifuzzaman et al. (2006)     | 16606699      | Escherichia coli |
| Butland et al. (2005)         | 15690043      | Escherichia coli |
| Arifuzzaman et al. (2006)     | 16606699      | Escherichia coli |
| Arifuzzaman et al. (2006)     | 16606699      | Escherichia coli |
| Butland et al. (2005)         | 15690043      | Escherichia coli |
| Arifuzzaman et al. (2006)     | 16606699      | Escherichia coli |
| Butland et al. (2005)         | 15690043      | Escherichia coli |

|                               |               |                  |
|-------------------------------|---------------|------------------|
| Butland et al. (2005)         | 15690043      | Escherichia coli |
| Butland et al. (2005)         | 15690043      | Escherichia coli |
| Butland et al. (2005)         | 15690043      | Escherichia coli |
| Butland et al. (2005)         | 15690043      | Escherichia coli |
| Bochkareva et al. (2002)      | 12071968      | Escherichia coli |
| Koike-Takeshita et al. (2006) | imex:IM-14417 | Escherichia coli |
| Butland et al. (2005)         | 15690043      | Escherichia coli |
| Butland et al. (2005)         | 15690043      | Escherichia coli |
| Sharma et al. (2008)          | imex:IM-11954 | Escherichia coli |
| Sharma et al. (2008)          | imex:IM-11954 | Escherichia coli |
| Sharma et al. (2008)          | imex:IM-11954 | Escherichia coli |
| Koike-Takeshita et al. (2006) | imex:IM-14417 | Escherichia coli |
| Butland et al. (2005)         | 15690043      | Escherichia coli |
| Arifuzzaman et al. (2006)     | 16606699      | Escherichia coli |
| Butland et al. (2005)         | 15690043      | Escherichia coli |
| Arifuzzaman et al. (2006)     | 16606699      | Escherichia coli |
| Pan et al.                    | imex:IM-9154  | Escherichia coli |
| Arifuzzaman et al. (2006)     | 16606699      | Escherichia coli |
| Pan et al.                    | imex:IM-9154  | Escherichia coli |
| Bochkareva et al. (2002)      | 12071968      | Escherichia coli |
| Butland et al. (2005)         | 15690043      | Escherichia coli |
| Butland et al. (2005)         | 15690043      | Escherichia coli |
| Butland et al. (2005)         | 15690043      | Escherichia coli |
| Butland et al. (2005)         | 15690043      | Escherichia coli |
| Arifuzzaman et al. (2006)     | 16606699      | Escherichia coli |
| Arifuzzaman et al. (2006)     | 16606699      | Escherichia coli |
| Pan et al.                    | imex:IM-9154  | Escherichia coli |
| Arifuzzaman et al. (2006)     | 16606699      | Escherichia coli |
| Arifuzzaman et al. (2006)     | 16606699      | Escherichia coli |
| Arifuzzaman et al. (2006)     | 16606699      | Escherichia coli |
| Arifuzzaman et al. (2006)     | 16606699      | Escherichia coli |
| Arifuzzaman et al. (2006)     | 16606699      | Escherichia coli |
| Butland et al. (2005)         | 15690043      | Escherichia coli |
| Arifuzzaman et al. (2006)     | 16606699      | Escherichia coli |
| Butland et al. (2005)         | 15690043      | Escherichia coli |
| Zeth et al. (2002)            | 12426582      | Escherichia coli |
| Guo et al. (2002)             | 12235156      | Escherichia coli |













|                       |          |                  |
|-----------------------|----------|------------------|
| Butland et al. (2005) | 15690043 | Escherichia coli |
| Butland et al. (2005) | 15690043 | Escherichia coli |
| Butland et al. (2005) | 15690043 | Escherichia coli |
| Butland et al. (2005) | 15690043 | Escherichia coli |
| Butland et al. (2005) | 15690043 | Escherichia coli |
| Butland et al. (2005) | 15690043 | Escherichia coli |
| Butland et al. (2005) | 15690043 | Escherichia coli |
| Butland et al. (2005) | 15690043 | Escherichia coli |
| Butland et al. (2005) | 15690043 | Escherichia coli |
| Butland et al. (2005) | 15690043 | Escherichia coli |
| Butland et al. (2005) | 15690043 | Escherichia coli |
| Butland et al. (2005) | 15690043 | Escherichia coli |
| Butland et al. (2005) | 15690043 | Escherichia coli |
| Butland et al. (2005) | 15690043 | Escherichia coli |
| Butland et al. (2005) | 15690043 | Escherichia coli |
| Butland et al. (2005) | 15690043 | Escherichia coli |

|                        |          |                  |
|------------------------|----------|------------------|
| Stenberg et al. (2005) | 16079137 | Escherichia coli |
| Stenberg et al. (2005) | 16079137 | Escherichia coli |

|                           |          |                  |
|---------------------------|----------|------------------|
| Arifuzzaman et al. (2006) | 16606699 | Escherichia coli |
| Arifuzzaman et al. (2006) | 16606699 | Escherichia coli |
| Arifuzzaman et al. (2006) | 16606699 | Escherichia coli |

|                           |          |                  |
|---------------------------|----------|------------------|
| Arifuzzaman et al. (2006) | 16606699 | Escherichia coli |
| Arifuzzaman et al. (2006) | 16606699 | Escherichia coli |
| Arifuzzaman et al. (2006) | 16606699 | Escherichia coli |
| Arifuzzaman et al. (2006) | 16606699 | Escherichia coli |

|                           |          |                  |
|---------------------------|----------|------------------|
| Arifuzzaman et al. (2006) | 16606699 | Escherichia coli |
|---------------------------|----------|------------------|

|                           |          |                  |
|---------------------------|----------|------------------|
| Arifuzzaman et al. (2006) | 16606699 | Escherichia coli |
|---------------------------|----------|------------------|

|                           |          |                  |
|---------------------------|----------|------------------|
| Arifuzzaman et al. (2006) | 16606699 | Escherichia coli |
|---------------------------|----------|------------------|

|                           |          |                  |
|---------------------------|----------|------------------|
| Arifuzzaman et al. (2006) | 16606699 | Escherichia coli |
| Arifuzzaman et al. (2006) | 16606699 | Escherichia coli |
| Arifuzzaman et al. (2006) | 16606699 | Escherichia coli |
| Arifuzzaman et al. (2006) | 16606699 | Escherichia coli |
| Arifuzzaman et al. (2006) | 16606699 | Escherichia coli |

|            |              |                  |
|------------|--------------|------------------|
| Pan et al. | imex:IM-9154 | Escherichia coli |
| Pan et al. | imex:IM-9154 | Escherichia coli |

|                           |                           |
|---------------------------|---------------------------|
| Arifuzzaman et al. (2006) | 16606699 Escherichia coli |
| Arifuzzaman et al. (2006) | 16606699 Escherichia coli |
| Arifuzzaman et al. (2006) | 16606699 Escherichia coli |
| Arifuzzaman et al. (2006) | 16606699 Escherichia coli |
| Lasserre et al. (2006)    | 16858726 Escherichia coli |
| Arifuzzaman et al. (2006) | 16606699 Escherichia coli |
| Arifuzzaman et al. (2006) | 16606699 Escherichia coli |
| Butland et al. (2005)     | 15690043 Escherichia coli |
| Butland et al. (2005)     | 15690043 Escherichia coli |
| Arifuzzaman et al. (2006) | 16606699 Escherichia coli |
| Butland et al. (2005)     | 15690043 Escherichia coli |
| Arifuzzaman et al. (2006) | 16606699 Escherichia coli |
| Arifuzzaman et al. (2006) | 16606699 Escherichia coli |
| Arifuzzaman et al. (2006) | 16606699 Escherichia coli |
| Butland et al. (2005)     | 15690043 Escherichia coli |
| Butland et al. (2005)     | 15690043 Escherichia coli |
| Arifuzzaman et al. (2006) | 16606699 Escherichia coli |
| Arifuzzaman et al. (2006) | 16606699 Escherichia coli |
| Arifuzzaman et al. (2006) | 16606699 Escherichia coli |
| Butland et al. (2005)     | 15690043 Escherichia coli |
| Arifuzzaman et al. (2006) | 16606699 Escherichia coli |
| Arifuzzaman et al. (2006) | 16606699 Escherichia coli |
| Arifuzzaman et al. (2006) | 16606699 Escherichia coli |
| Butland et al. (2005)     | 15690043 Escherichia coli |
| Arifuzzaman et al. (2006) | 16606699 Escherichia coli |
| Arifuzzaman et al. (2006) | 16606699 Escherichia coli |
| Butland et al. (2005)     | 15690043 Escherichia coli |











|                           |                           |
|---------------------------|---------------------------|
| Butland et al. (2005)     | 15690043 Escherichia coli |
| Butland et al. (2005)     | 15690043 Escherichia coli |
| Butland et al. (2005)     | 15690043 Escherichia coli |
| Butland et al. (2005)     | 15690043 Escherichia coli |
| Butland et al. (2005)     | 15690043 Escherichia coli |
| Butland et al. (2005)     | 15690043 Escherichia coli |
| Arifuzzaman et al. (2006) | 16606699 Escherichia coli |
| Arifuzzaman et al. (2006) | 16606699 Escherichia coli |
| Arifuzzaman et al. (2006) | 16606699 Escherichia coli |
| Arifuzzaman et al. (2006) | 16606699 Escherichia coli |
| Arifuzzaman et al. (2006) | 16606699 Escherichia coli |
| Arifuzzaman et al. (2006) | 16606699 Escherichia coli |
| Arifuzzaman et al. (2006) | 16606699 Escherichia coli |
| Arifuzzaman et al. (2006) | 16606699 Escherichia coli |
| Arifuzzaman et al. (2006) | 16606699 Escherichia coli |
| Arifuzzaman et al. (2006) | 16606699 Escherichia coli |
| Butland et al. (2005)     | 15690043 Escherichia coli |
| Butland et al. (2005)     | 15690043 Escherichia coli |
| Arifuzzaman et al. (2006) | 16606699 Escherichia coli |
| Arifuzzaman et al. (2006) | 16606699 Escherichia coli |
| Arifuzzaman et al. (2006) | 16606699 Escherichia coli |
| Arifuzzaman et al. (2006) | 16606699 Escherichia coli |
| Arifuzzaman et al. (2006) | 16606699 Escherichia coli |
| Arifuzzaman et al. (2006) | 16606699 Escherichia coli |
| Yankovskaya et al. (2003) | 12560550 Escherichia coli |
| Yankovskaya et al. (2003) | 12560550 Escherichia coli |
| Stenberg et al. (2005)    | 16079137 Escherichia coli |
| Yankovskaya et al. (2003) | 12560550 Escherichia coli |
| Yankovskaya et al. (2003) | 12560550 Escherichia coli |







Arifuzzaman et al. (2006) 16606699 Escherichia coli  
Arifuzzaman et al. (2006) 16606699 Escherichia coli

Jeruzalmi et al. (2001) 11525728 Escherichia coli  
Jeruzalmi et al. (2001) 11525728 Escherichia coli

Butland et al. (2005) 15690043 Escherichia coli  
Butland et al. (2005) 15690043 Escherichia coli  
Butland et al. (2005) 15690043 Escherichia coli  
Butland et al. (2005) 15690043 Escherichia coli  
Butland et al. (2005) 15690043 Escherichia coli  
Butland et al. (2005) 15690043 Escherichia coli  
Butland et al. (2005) 15690043 Escherichia coli  
Butland et al. (2005) 15690043 Escherichia coli  
Butland et al. (2005) 15690043 Escherichia coli  
Butland et al. (2005) 15690043 Escherichia coli  
Butland et al. (2005) 15690043 Escherichia coli  
Butland et al. (2005) 15690043 Escherichia coli  
Butland et al. (2005) 15690043 Escherichia coli  
Butland et al. (2005) 15690043 Escherichia coli  
Butland et al. (2005) 15690043 Escherichia coli  
Arifuzzaman et al. (2006) 16606699 Escherichia coli  
Butland et al. (2005) 15690043 Escherichia coli

Butland et al. (2005) 15690043 Escherichia coli  
Arifuzzaman et al. (2006) 16606699 Escherichia coli  
Arifuzzaman et al. (2006) 16606699 Escherichia coli  
Butland et al. (2005) 15690043 Escherichia coli  
Arifuzzaman et al. (2006) 16606699 Escherichia coli  
Butland et al. (2005) 15690043 Escherichia coli  
Arifuzzaman et al. (2006) 16606699 Escherichia coli  
Arifuzzaman et al. (2006) 16606699 Escherichia coli  
Butland et al. (2005) 15690043 Escherichia coli  
Arifuzzaman et al. (2006) 16606699 Escherichia coli  
Butland et al. (2005) 15690043 Escherichia coli  
Butland et al. (2005) 15690043 Escherichia coli

|                           |              |                  |
|---------------------------|--------------|------------------|
| Vargason et al. (2000)    | 10966645     | Escherichia coli |
| Butland et al. (2005)     | 15690043     | Escherichia coli |
| Butland et al. (2005)     | 15690043     | Escherichia coli |
| Butland et al. (2005)     | 15690043     | Escherichia coli |
| Lasserre et al. (2006)    | 16858726     | Escherichia coli |
| Pan et al.                | imex:IM-9154 | Escherichia coli |
| Lasserre et al. (2006)    | 16858726     | Escherichia coli |
| Butland et al. (2005)     | 15690043     | Escherichia coli |
| Pan et al.                | imex:IM-9154 | Escherichia coli |
| Butland et al. (2005)     | 15690043     | Escherichia coli |
| Butland et al. (2005)     | 15690043     | Escherichia coli |
| Arifuzzaman et al. (2006) | 16606699     | Escherichia coli |
| Arifuzzaman et al. (2006) | 16606699     | Escherichia coli |
| Butland et al. (2005)     | 15690043     | Escherichia coli |
| Arifuzzaman et al. (2006) | 16606699     | Escherichia coli |
| Butland et al. (2005)     | 15690043     | Escherichia coli |
| Arifuzzaman et al. (2006) | 16606699     | Escherichia coli |
| Butland et al. (2005)     | 15690043     | Escherichia coli |
| Butland et al. (2005)     | 15690043     | Escherichia coli |

|                           |          |                  |
|---------------------------|----------|------------------|
| Butland et al. (2005)     | 15690043 | Escherichia coli |
| Arifuzzaman et al. (2006) | 16606699 | Escherichia coli |
| Butland et al. (2005)     | 15690043 | Escherichia coli |
| Kawashima et al. (1996)   | 8596629  | Escherichia coli |
| Lasserre et al. (2006)    | 16858726 | Escherichia coli |
| Butland et al. (2005)     | 15690043 | Escherichia coli |
| Butland et al. (2005)     | 15690043 | Escherichia coli |
| Butland et al. (2005)     | 15690043 | Escherichia coli |
| Butland et al. (2005)     | 15690043 | Escherichia coli |

|                           |          |                  |
|---------------------------|----------|------------------|
| Butland et al. (2005)     | 15690043 | Escherichia coli |
| Butland et al. (2005)     | 15690043 | Escherichia coli |
| Butland et al. (2005)     | 15690043 | Escherichia coli |
| Butland et al. (2005)     | 15690043 | Escherichia coli |
| Butland et al. (2005)     | 15690043 | Escherichia coli |
| Arifuzzaman et al. (2006) | 16606699 | Escherichia coli |
| Arifuzzaman et al. (2006) | 16606699 | Escherichia coli |
| Butland et al. (2005)     | 15690043 | Escherichia coli |



|                       |          |                  |
|-----------------------|----------|------------------|
| Butland et al. (2005) | 15690043 | Escherichia coli |
| Butland et al. (2005) | 15690043 | Escherichia coli |
| Butland et al. (2005) | 15690043 | Escherichia coli |
| Butland et al. (2005) | 15690043 | Escherichia coli |
| Butland et al. (2005) | 15690043 | Escherichia coli |
| Butland et al. (2005) | 15690043 | Escherichia coli |
| Butland et al. (2005) | 15690043 | Escherichia coli |
| Butland et al. (2005) | 15690043 | Escherichia coli |
| Butland et al. (2005) | 15690043 | Escherichia coli |
| Butland et al. (2005) | 15690043 | Escherichia coli |

|                           |          |                  |
|---------------------------|----------|------------------|
| Arifuzzaman et al. (2006) | 16606699 | Escherichia coli |
| Arifuzzaman et al. (2006) | 16606699 | Escherichia coli |
| Arifuzzaman et al. (2006) | 16606699 | Escherichia coli |
| Arifuzzaman et al. (2006) | 16606699 | Escherichia coli |
| Arifuzzaman et al. (2006) | 16606699 | Escherichia coli |

|                           |          |                  |
|---------------------------|----------|------------------|
| Arifuzzaman et al. (2006) | 16606699 | Escherichia coli |
| Arifuzzaman et al. (2006) | 16606699 | Escherichia coli |
| Arifuzzaman et al. (2006) | 16606699 | Escherichia coli |
| Arifuzzaman et al. (2006) | 16606699 | Escherichia coli |
| Arifuzzaman et al. (2006) | 16606699 | Escherichia coli |
| Arifuzzaman et al. (2006) | 16606699 | Escherichia coli |

|                           |              |                  |
|---------------------------|--------------|------------------|
| Arifuzzaman et al. (2006) | 16606699     | Escherichia coli |
| Butland et al. (2005)     | 15690043     | Escherichia coli |
| Butland et al. (2005)     | 15690043     | Escherichia coli |
| Butland et al. (2005)     | 15690043     | Escherichia coli |
| Pan et al.                | imex:IM-9154 | Escherichia coli |
| Arifuzzaman et al. (2006) | 16606699     | Escherichia coli |
| Arifuzzaman et al. (2006) | 16606699     | Escherichia coli |
| Butland et al. (2005)     | 15690043     | Escherichia coli |
| Butland et al. (2005)     | 15690043     | Escherichia coli |
| Butland et al. (2005)     | 15690043     | Escherichia coli |
| Arifuzzaman et al. (2006) | 16606699     | Escherichia coli |
| Arifuzzaman et al. (2006) | 16606699     | Escherichia coli |
| Arifuzzaman et al. (2006) | 16606699     | Escherichia coli |
| Arifuzzaman et al. (2006) | 16606699     | Escherichia coli |
| Butland et al. (2005)     | 15690043     | Escherichia coli |







|                           |          |                  |
|---------------------------|----------|------------------|
| Butland et al. (2005)     | 15690043 | Escherichia coli |
| Butland et al. (2005)     | 15690043 | Escherichia coli |
| Butland et al. (2005)     | 15690043 | Escherichia coli |
| Butland et al. (2005)     | 15690043 | Escherichia coli |
| Arifuzzaman et al. (2006) | 16606699 | Escherichia coli |

|                           |          |                  |
|---------------------------|----------|------------------|
| Arifuzzaman et al. (2006) | 16606699 | Escherichia coli |
| Arifuzzaman et al. (2006) | 16606699 | Escherichia coli |
| Lasserre et al. (2006)    | 16858726 | Escherichia coli |
| Arifuzzaman et al. (2006) | 16606699 | Escherichia coli |
| Arifuzzaman et al. (2006) | 16606699 | Escherichia coli |

|                           |          |                  |
|---------------------------|----------|------------------|
| Arifuzzaman et al. (2006) | 16606699 | Escherichia coli |
| Arifuzzaman et al. (2006) | 16606699 | Escherichia coli |
| Arifuzzaman et al. (2006) | 16606699 | Escherichia coli |
| Arifuzzaman et al. (2006) | 16606699 | Escherichia coli |
| Arifuzzaman et al. (2006) | 16606699 | Escherichia coli |
| Arifuzzaman et al. (2006) | 16606699 | Escherichia coli |
| Arifuzzaman et al. (2006) | 16606699 | Escherichia coli |
| Arifuzzaman et al. (2006) | 16606699 | Escherichia coli |

|                          |          |                  |
|--------------------------|----------|------------------|
| Rajagopala et al. (2009) | 19834901 | Escherichia coli |
| Rajagopala et al. (2009) | 19834901 | Escherichia coli |

|                         |               |                  |
|-------------------------|---------------|------------------|
| Remaut et al. (2008)    | imex:IM-11919 | Escherichia coli |
| Remaut et al. (2008)    | imex:IM-11919 | Escherichia coli |
| Remaut et al. (2008)    | imex:IM-11919 | Escherichia coli |
| Le et al. (2010)        | imex:IM-14143 | Escherichia coli |
| Remaut et al. (2008)    | imex:IM-11919 | Escherichia coli |
| Remaut et al. (2008)    | imex:IM-11919 | Escherichia coli |
| Le et al. (2010)        | imex:IM-14143 | Escherichia coli |
| Hung et al. (2002)      | 12010488      | Escherichia coli |
| Hung et al. (2002)      | 12010488      | Escherichia coli |
| Choudhury et al. (1999) | 10446051      | Escherichia coli |
| Remaut et al. (2008)    | imex:IM-11919 | Escherichia coli |
| Remaut et al. (2008)    | imex:IM-11919 | Escherichia coli |
| Le et al. (2010)        | imex:IM-14143 | Escherichia coli |





|                           |                           |
|---------------------------|---------------------------|
| Arifuzzaman et al. (2006) | 16606699 Escherichia coli |
| Arifuzzaman et al. (2006) | 16606699 Escherichia coli |
| Arifuzzaman et al. (2006) | 16606699 Escherichia coli |
| Arifuzzaman et al. (2006) | 16606699 Escherichia coli |
| Arifuzzaman et al. (2006) | 16606699 Escherichia coli |
| Arifuzzaman et al. (2006) | 16606699 Escherichia coli |
| Arifuzzaman et al. (2006) | 16606699 Escherichia coli |
| Arifuzzaman et al. (2006) | 16606699 Escherichia coli |
| Arifuzzaman et al. (2006) | 16606699 Escherichia coli |
| Arifuzzaman et al. (2006) | 16606699 Escherichia coli |
| Arifuzzaman et al. (2006) | 16606699 Escherichia coli |
| Iverson et al. (2002)     | 11850430 Escherichia coli |
| Iverson et al. (2002)     | 11850430 Escherichia coli |
| Iverson et al. (2002)     | 11850430 Escherichia coli |
| Huang et al. (2006)       | 17137328 Escherichia coli |
| Iverson et al. (2002)     | 11850430 Escherichia coli |
| Iverson et al. (2002)     | 11850430 Escherichia coli |
| Iverson et al. (2002)     | 11850430 Escherichia coli |
| Iverson et al. (2002)     | 11850430 Escherichia coli |
| Iverson et al. (2002)     | 11850430 Escherichia coli |
| Iverson et al. (2002)     | 11850430 Escherichia coli |
| Iverson et al. (2002)     | 11850430 Escherichia coli |
| Huang et al. (2006)       | 17137328 Escherichia coli |
| Huang et al. (2006)       | 17137328 Escherichia coli |
| Arifuzzaman et al. (2006) | 16606699 Escherichia coli |
| Huang et al. (2006)       | 17137328 Escherichia coli |
| Huang et al. (2006)       | 17137328 Escherichia coli |
| Butland et al. (2005)     | 15690043 Escherichia coli |
| Huang et al. (2006)       | 17137328 Escherichia coli |
| Arifuzzaman et al. (2006) | 16606699 Escherichia coli |
| Lasserre et al. (2006)    | 16858726 Escherichia coli |
| Arifuzzaman et al. (2006) | 16606699 Escherichia coli |
| Arifuzzaman et al. (2006) | 16606699 Escherichia coli |
| Arifuzzaman et al. (2006) | 16606699 Escherichia coli |
| Arifuzzaman et al. (2006) | 16606699 Escherichia coli |
| Arifuzzaman et al. (2006) | 16606699 Escherichia coli |



|                           |                           |
|---------------------------|---------------------------|
| Arifuzzaman et al. (2006) | 16606699 Escherichia coli |
| Arifuzzaman et al. (2006) | 16606699 Escherichia coli |
| Butland et al. (2005)     | 15690043 Escherichia coli |
| Arifuzzaman et al. (2006) | 16606699 Escherichia coli |
| Arifuzzaman et al. (2006) | 16606699 Escherichia coli |
| Arifuzzaman et al. (2006) | 16606699 Escherichia coli |
| Arifuzzaman et al. (2006) | 16606699 Escherichia coli |
| Arifuzzaman et al. (2006) | 16606699 Escherichia coli |
| Karimova et al. (2005)    | 15774864 Escherichia coli |
| Karimova et al. (2005)    | 15774864 Escherichia coli |
| Karimova et al. (2005)    | 15774864 Escherichia coli |
| Karimova et al. (2005)    | 15774864 Escherichia coli |
| Karimova et al. (2005)    | 15774864 Escherichia coli |
| Karimova et al. (2005)    | 15774864 Escherichia coli |
| Karimova et al. (2005)    | 15774864 Escherichia coli |
| Karimova et al. (2005)    | 15774864 Escherichia coli |
| Karimova et al. (2005)    | 15774864 Escherichia coli |
| Butland et al. (2005)     | 15690043 Escherichia coli |
| Butland et al. (2005)     | 15690043 Escherichia coli |
| Butland et al. (2005)     | 15690043 Escherichia coli |
| Butland et al. (2005)     | 15690043 Escherichia coli |
| Karimova et al. (2005)    | 15774864 Escherichia coli |
| Corbin et al. (2007)      | 17307852 Escherichia coli |
| Butland et al. (2005)     | 15690043 Escherichia coli |
| Butland et al. (2005)     | 15690043 Escherichia coli |
| Butland et al. (2005)     | 15690043 Escherichia coli |
| Arifuzzaman et al. (2006) | 16606699 Escherichia coli |
| Butland et al. (2005)     | 15690043 Escherichia coli |
| Arifuzzaman et al. (2006) | 16606699 Escherichia coli |
| Butland et al. (2005)     | 15690043 Escherichia coli |
| Butland et al. (2005)     | 15690043 Escherichia coli |
| Arifuzzaman et al. (2006) | 16606699 Escherichia coli |
| Butland et al. (2005)     | 15690043 Escherichia coli |
| Butland et al. (2005)     | 15690043 Escherichia coli |
| Butland et al. (2005)     | 15690043 Escherichia coli |
| Arifuzzaman et al. (2006) | 16606699 Escherichia coli |
| Butland et al. (2005)     | 15690043 Escherichia coli |
| Butland et al. (2005)     | 15690043 Escherichia coli |

|                           |                           |
|---------------------------|---------------------------|
| Liu et al. (1999)         | 10209756 Escherichia coli |
| Arifuzzaman et al. (2006) | 16606699 Escherichia coli |
| Arifuzzaman et al. (2006) | 16606699 Escherichia coli |
| Arifuzzaman et al. (2006) | 16606699 Escherichia coli |
| Mosyak et al. (2000)      | 10880432 Escherichia coli |
| Butland et al. (2005)     | 15690043 Escherichia coli |
| Butland et al. (2005)     | 15690043 Escherichia coli |
| Butland et al. (2005)     | 15690043 Escherichia coli |
| Butland et al. (2005)     | 15690043 Escherichia coli |
| Arifuzzaman et al. (2006) | 16606699 Escherichia coli |
| Arifuzzaman et al. (2006) | 16606699 Escherichia coli |
| Arifuzzaman et al. (2006) | 16606699 Escherichia coli |
| Arifuzzaman et al. (2006) | 16606699 Escherichia coli |
| Arifuzzaman et al. (2006) | 16606699 Escherichia coli |
| Arifuzzaman et al. (2006) | 16606699 Escherichia coli |
| Arifuzzaman et al. (2006) | 16606699 Escherichia coli |
| Arifuzzaman et al. (2006) | 16606699 Escherichia coli |
| Butland et al. (2005)     | 15690043 Escherichia coli |
| Butland et al. (2005)     | 15690043 Escherichia coli |
| Butland et al. (2005)     | 15690043 Escherichia coli |
| Butland et al. (2005)     | 15690043 Escherichia coli |
| Butland et al. (2005)     | 15690043 Escherichia coli |
| Butland et al. (2005)     | 15690043 Escherichia coli |
| Butland et al. (2005)     | 15690043 Escherichia coli |
| Butland et al. (2005)     | 15690043 Escherichia coli |
| Arifuzzaman et al. (2006) | 16606699 Escherichia coli |
| Arifuzzaman et al. (2006) | 16606699 Escherichia coli |
| Arifuzzaman et al. (2006) | 16606699 Escherichia coli |
| Lasserre et al. (2006)    | 16858726 Escherichia coli |
| Lasserre et al. (2006)    | 16858726 Escherichia coli |
| Arifuzzaman et al. (2006) | 16606699 Escherichia coli |
| Arifuzzaman et al. (2006) | 16606699 Escherichia coli |



Arifuzzaman et al. (2006) 16606699 Escherichia coli  
Pan et al. imex:IM-9154 Escherichia coli

Arifuzzaman et al. (2006) 16606699 Escherichia coli  
Arifuzzaman et al. (2006) 16606699 Escherichia coli  
Arifuzzaman et al. (2006) 16606699 Escherichia coli  
Arifuzzaman et al. (2006) 16606699 Escherichia coli  
Arifuzzaman et al. (2006) 16606699 Escherichia coli  
Arifuzzaman et al. (2006) 16606699 Escherichia coli  
Arifuzzaman et al. (2006) 16606699 Escherichia coli  
Arifuzzaman et al. (2006) 16606699 Escherichia coli  
Arifuzzaman et al. (2006) 16606699 Escherichia coli

Arifuzzaman et al. (2006) 16606699 Escherichia coli  
Arifuzzaman et al. (2006) 16606699 Escherichia coli  
Arifuzzaman et al. (2006) 16606699 Escherichia coli  
Arifuzzaman et al. (2006) 16606699 Escherichia coli  
Arifuzzaman et al. (2006) 16606699 Escherichia coli  
Arifuzzaman et al. (2006) 16606699 Escherichia coli

Arifuzzaman et al. (2006) 16606699 Escherichia coli  
Arifuzzaman et al. (2006) 16606699 Escherichia coli  
Arifuzzaman et al. (2006) 16606699 Escherichia coli

Arifuzzaman et al. (2006) 16606699 Escherichia coli  
Arifuzzaman et al. (2006) 16606699 Escherichia coli  
Arifuzzaman et al. (2006) 16606699 Escherichia coli

Butland et al. (2005) 15690043 Escherichia coli  
Butland et al. (2005) 15690043 Escherichia coli  
Butland et al. (2005) 15690043 Escherichia coli  
Butland et al. (2005) 15690043 Escherichia coli  
Butland et al. (2005) 15690043 Escherichia coli  
Butland et al. (2005) 15690043 Escherichia coli  
Butland et al. (2005) 15690043 Escherichia coli

Arifuzzaman et al. (2006) 16606699 Escherichia coli  
Arifuzzaman et al. (2006) 16606699 Escherichia coli  
Arifuzzaman et al. (2006) 16606699 Escherichia coli



Arifuzzaman et al. (2006) 16606699 Escherichia coli  
Arifuzzaman et al. (2006) 16606699 Escherichia coli  
Arifuzzaman et al. (2006) 16606699 Escherichia coli  
Arifuzzaman et al. (2006) 16606699 Escherichia coli  
Arifuzzaman et al. (2006) 16606699 Escherichia coli

Arifuzzaman et al. (2006) 16606699 Escherichia coli  
Arifuzzaman et al. (2006) 16606699 Escherichia coli

Butland et al. (2005) 15690043 Escherichia coli  
Arifuzzaman et al. (2006) 16606699 Escherichia coli

Arifuzzaman et al. (2006) 16606699 Escherichia coli  
Arifuzzaman et al. (2006) 16606699 Escherichia coli  
Arifuzzaman et al. (2006) 16606699 Escherichia coli  
Arifuzzaman et al. (2006) 16606699 Escherichia coli

Arifuzzaman et al. (2006) 16606699 Escherichia coli  
Arifuzzaman et al. (2006) 16606699 Escherichia coli  
Arifuzzaman et al. (2006) 16606699 Escherichia coli  
Arifuzzaman et al. (2006) 16606699 Escherichia coli  
Arifuzzaman et al. (2006) 16606699 Escherichia coli

Arifuzzaman et al. (2006) 16606699 Escherichia coli  
Arifuzzaman et al. (2006) 16606699 Escherichia coli  
Arifuzzaman et al. (2006) 16606699 Escherichia coli  
Arifuzzaman et al. (2006) 16606699 Escherichia coli  
Arifuzzaman et al. (2006) 16606699 Escherichia coli

Arifuzzaman et al. (2006) 16606699 Escherichia coli  
Arifuzzaman et al. (2006) 16606699 Escherichia coli  
Arifuzzaman et al. (2006) 16606699 Escherichia coli  
Arifuzzaman et al. (2006) 16606699 Escherichia coli  
Arifuzzaman et al. (2006) 16606699 Escherichia coli







|                           |                           |
|---------------------------|---------------------------|
| Arifuzzaman et al. (2006) | 16606699 Escherichia coli |
| Butland et al. (2005)     | 15690043 Escherichia coli |
| Arifuzzaman et al. (2006) | 16606699 Escherichia coli |
| Butland et al. (2005)     | 15690043 Escherichia coli |
| Butland et al. (2005)     | 15690043 Escherichia coli |
| Butland et al. (2005)     | 15690043 Escherichia coli |
| Butland et al. (2005)     | 15690043 Escherichia coli |
| Arifuzzaman et al. (2006) | 16606699 Escherichia coli |
| Butland et al. (2005)     | 15690043 Escherichia coli |
| Arifuzzaman et al. (2006) | 16606699 Escherichia coli |
| Butland et al. (2005)     | 15690043 Escherichia coli |
| Arifuzzaman et al. (2006) | 16606699 Escherichia coli |
| Butland et al. (2005)     | 15690043 Escherichia coli |
| Arifuzzaman et al. (2006) | 16606699 Escherichia coli |
| Arifuzzaman et al. (2006) | 16606699 Escherichia coli |
| Arifuzzaman et al. (2006) | 16606699 Escherichia coli |
| Arifuzzaman et al. (2006) | 16606699 Escherichia coli |

|                           |                           |
|---------------------------|---------------------------|
| Arifuzzaman et al. (2006) | 16606699 Escherichia coli |
| Arifuzzaman et al. (2006) | 16606699 Escherichia coli |

|                           |                           |
|---------------------------|---------------------------|
| Arifuzzaman et al. (2006) | 16606699 Escherichia coli |
|---------------------------|---------------------------|

|                           |                           |
|---------------------------|---------------------------|
| Arifuzzaman et al. (2006) | 16606699 Escherichia coli |
|---------------------------|---------------------------|

|                           |                           |
|---------------------------|---------------------------|
| Arifuzzaman et al. (2006) | 16606699 Escherichia coli |
| Arifuzzaman et al. (2006) | 16606699 Escherichia coli |

|                           |                           |
|---------------------------|---------------------------|
| Arifuzzaman et al. (2006) | 16606699 Escherichia coli |
| Butland et al. (2005)     | 15690043 Escherichia coli |
| Rajagopala et al. (2009)  | 19834901 Escherichia coli |
| Butland et al. (2005)     | 15690043 Escherichia coli |
| Butland et al. (2005)     | 15690043 Escherichia coli |
| Butland et al. (2005)     | 15690043 Escherichia coli |
| Butland et al. (2005)     | 15690043 Escherichia coli |
| Butland et al. (2005)     | 15690043 Escherichia coli |
| Butland et al. (2005)     | 15690043 Escherichia coli |
| Butland et al. (2005)     | 15690043 Escherichia coli |
| Rajagopala et al. (2009)  | 19834901 Escherichia coli |
| Rajagopala et al. (2009)  | 19834901 Escherichia coli |
| Butland et al. (2005)     | 15690043 Escherichia coli |
| Rajagopala et al. (2009)  | 19834901 Escherichia coli |

|                           |              |                  |
|---------------------------|--------------|------------------|
| Butland et al. (2005)     | 15690043     | Escherichia coli |
| Butland et al. (2005)     | 15690043     | Escherichia coli |
| Arifuzzaman et al. (2006) | 16606699     | Escherichia coli |
| Butland et al. (2005)     | 15690043     | Escherichia coli |
| Butland et al. (2005)     | 15690043     | Escherichia coli |
| Butland et al. (2005)     | 15690043     | Escherichia coli |
| Arifuzzaman et al. (2006) | 16606699     | Escherichia coli |
| Butland et al. (2005)     | 15690043     | Escherichia coli |
| Butland et al. (2005)     | 15690043     | Escherichia coli |
| Butland et al. (2005)     | 15690043     | Escherichia coli |
| Butland et al. (2005)     | 15690043     | Escherichia coli |
| Butland et al. (2005)     | 15690043     | Escherichia coli |
| Rajagopala et al. (2009)  | 19834901     | Escherichia coli |
| Rajagopala et al. (2009)  | 19834901     | Escherichia coli |
| Butland et al. (2005)     | 15690043     | Escherichia coli |
| Arifuzzaman et al. (2006) | 16606699     | Escherichia coli |
| Rajagopala et al. (2009)  | 19834901     | Escherichia coli |
| Arifuzzaman et al. (2006) | 16606699     | Escherichia coli |
| Butland et al. (2005)     | 15690043     | Escherichia coli |
| Butland et al. (2005)     | 15690043     | Escherichia coli |
| Arifuzzaman et al. (2006) | 16606699     | Escherichia coli |
| Arifuzzaman et al. (2006) | 16606699     | Escherichia coli |
| Butland et al. (2005)     | 15690043     | Escherichia coli |
| Butland et al. (2005)     | 15690043     | Escherichia coli |
| Butland et al. (2005)     | 15690043     | Escherichia coli |
| Butland et al. (2005)     | 15690043     | Escherichia coli |
| Butland et al. (2005)     | 15690043     | Escherichia coli |
| Butland et al. (2005)     | 15690043     | Escherichia coli |
| Pan et al.                | imex:IM-9154 | Escherichia coli |
| Butland et al. (2005)     | 15690043     | Escherichia coli |
| Butland et al. (2005)     | 15690043     | Escherichia coli |
| Butland et al. (2005)     | 15690043     | Escherichia coli |
| Butland et al. (2005)     | 15690043     | Escherichia coli |
| Butland et al. (2005)     | 15690043     | Escherichia coli |
| Butland et al. (2005)     | 15690043     | Escherichia coli |
| Butland et al. (2005)     | 15690043     | Escherichia coli |
| Butland et al. (2005)     | 15690043     | Escherichia coli |
| Butland et al. (2005)     | 15690043     | Escherichia coli |
| Arifuzzaman et al. (2006) | 16606699     | Escherichia coli |



















|                           |                           |
|---------------------------|---------------------------|
| Butland et al. (2005)     | 15690043 Escherichia coli |
| Butland et al. (2005)     | 15690043 Escherichia coli |
| Butland et al. (2005)     | 15690043 Escherichia coli |
| Butland et al. (2005)     | 15690043 Escherichia coli |
| Butland et al. (2005)     | 15690043 Escherichia coli |
| Butland et al. (2005)     | 15690043 Escherichia coli |
| Butland et al. (2005)     | 15690043 Escherichia coli |
| Arifuzzaman et al. (2006) | 16606699 Escherichia coli |
| Arifuzzaman et al. (2006) | 16606699 Escherichia coli |
| Arifuzzaman et al. (2006) | 16606699 Escherichia coli |
| Butland et al. (2005)     | 15690043 Escherichia coli |
| Butland et al. (2005)     | 15690043 Escherichia coli |

|                           |                           |
|---------------------------|---------------------------|
| Arifuzzaman et al. (2006) | 16606699 Escherichia coli |
| Butland et al. (2005)     | 15690043 Escherichia coli |
| Butland et al. (2005)     | 15690043 Escherichia coli |
| Butland et al. (2005)     | 15690043 Escherichia coli |
| Butland et al. (2005)     | 15690043 Escherichia coli |
| Butland et al. (2005)     | 15690043 Escherichia coli |
| Butland et al. (2005)     | 15690043 Escherichia coli |
| Butland et al. (2005)     | 15690043 Escherichia coli |
| Butland et al. (2005)     | 15690043 Escherichia coli |
| Butland et al. (2005)     | 15690043 Escherichia coli |
| Butland et al. (2005)     | 15690043 Escherichia coli |
| Butland et al. (2005)     | 15690043 Escherichia coli |
| Butland et al. (2005)     | 15690043 Escherichia coli |
| Butland et al. (2005)     | 15690043 Escherichia coli |

|                           |                           |
|---------------------------|---------------------------|
| Arifuzzaman et al. (2006) | 16606699 Escherichia coli |
| Arifuzzaman et al. (2006) | 16606699 Escherichia coli |
| Arifuzzaman et al. (2006) | 16606699 Escherichia coli |
| Arifuzzaman et al. (2006) | 16606699 Escherichia coli |

|                           |                           |
|---------------------------|---------------------------|
| Arifuzzaman et al. (2006) | 16606699 Escherichia coli |
| Arifuzzaman et al. (2006) | 16606699 Escherichia coli |





|                       |                           |
|-----------------------|---------------------------|
| Butland et al. (2005) | 15690043 Escherichia coli |
| Butland et al. (2005) | 15690043 Escherichia coli |
| Butland et al. (2005) | 15690043 Escherichia coli |
| Butland et al. (2005) | 15690043 Escherichia coli |
| Butland et al. (2005) | 15690043 Escherichia coli |
| Butland et al. (2005) | 15690043 Escherichia coli |
| Butland et al. (2005) | 15690043 Escherichia coli |
| Butland et al. (2005) | 15690043 Escherichia coli |
| Butland et al. (2005) | 15690043 Escherichia coli |
| Butland et al. (2005) | 15690043 Escherichia coli |
| Butland et al. (2005) | 15690043 Escherichia coli |
| Butland et al. (2005) | 15690043 Escherichia coli |

|                       |                           |
|-----------------------|---------------------------|
| Graille et al. (2004) | 15014439 Escherichia coli |
| Yajima et al. (2004)  | 15336558 Escherichia coli |

|                       |                           |
|-----------------------|---------------------------|
| Butland et al. (2005) | 15690043 Escherichia coli |
| Butland et al. (2005) | 15690043 Escherichia coli |
| Butland et al. (2005) | 15690043 Escherichia coli |
| Butland et al. (2005) | 15690043 Escherichia coli |

|                           |                           |
|---------------------------|---------------------------|
| Butland et al. (2005)     | 15690043 Escherichia coli |
| Butland et al. (2005)     | 15690043 Escherichia coli |
| Butland et al. (2005)     | 15690043 Escherichia coli |
| Butland et al. (2005)     | 15690043 Escherichia coli |
| Arifuzzaman et al. (2006) | 16606699 Escherichia coli |
| Arifuzzaman et al. (2006) | 16606699 Escherichia coli |
| Butland et al. (2005)     | 15690043 Escherichia coli |
| Butland et al. (2005)     | 15690043 Escherichia coli |
| Butland et al. (2005)     | 15690043 Escherichia coli |
| Arifuzzaman et al. (2006) | 16606699 Escherichia coli |
| Butland et al. (2005)     | 15690043 Escherichia coli |
| Butland et al. (2005)     | 15690043 Escherichia coli |
| Arifuzzaman et al. (2006) | 16606699 Escherichia coli |
| Arifuzzaman et al. (2006) | 16606699 Escherichia coli |
| Arifuzzaman et al. (2006) | 16606699 Escherichia coli |
| Butland et al. (2005)     | 15690043 Escherichia coli |
| Butland et al. (2005)     | 15690043 Escherichia coli |

|                       |                           |
|-----------------------|---------------------------|
| Butland et al. (2005) | 15690043 Escherichia coli |
| Butland et al. (2005) | 15690043 Escherichia coli |
| Butland et al. (2005) | 15690043 Escherichia coli |
| Butland et al. (2005) | 15690043 Escherichia coli |
| Butland et al. (2005) | 15690043 Escherichia coli |
| Butland et al. (2005) | 15690043 Escherichia coli |
| Butland et al. (2005) | 15690043 Escherichia coli |
| Butland et al. (2005) | 15690043 Escherichia coli |
| Butland et al. (2005) | 15690043 Escherichia coli |
| Butland et al. (2005) | 15690043 Escherichia coli |
| Butland et al. (2005) | 15690043 Escherichia coli |
| Butland et al. (2005) | 15690043 Escherichia coli |
| Butland et al. (2005) | 15690043 Escherichia coli |
| Butland et al. (2005) | 15690043 Escherichia coli |
| Butland et al. (2005) | 15690043 Escherichia coli |
| Butland et al. (2005) | 15690043 Escherichia coli |
| Butland et al. (2005) | 15690043 Escherichia coli |
| Butland et al. (2005) | 15690043 Escherichia coli |
| Butland et al. (2005) | 15690043 Escherichia coli |

|                                     |                           |
|-------------------------------------|---------------------------|
| Arifuzzaman et al. (2006)           | 16606699 Escherichia coli |
| Ollagnier-de-Choudens et al. (2001) | 11319236 Escherichia coli |
| Ollagnier-de-Choudens et al. (2001) | 11319236 Escherichia coli |
| Arifuzzaman et al. (2006)           | 16606699 Escherichia coli |
| Arifuzzaman et al. (2006)           | 16606699 Escherichia coli |
| Arifuzzaman et al. (2006)           | 16606699 Escherichia coli |
| Arifuzzaman et al. (2006)           | 16606699 Escherichia coli |
| Butland et al. (2005)               | 15690043 Escherichia coli |
| Butland et al. (2005)               | 15690043 Escherichia coli |
| Arifuzzaman et al. (2006)           | 16606699 Escherichia coli |
| Arifuzzaman et al. (2006)           | 16606699 Escherichia coli |
| Butland et al. (2005)               | 15690043 Escherichia coli |
| Arifuzzaman et al. (2006)           | 16606699 Escherichia coli |
| Arifuzzaman et al. (2006)           | 16606699 Escherichia coli |
| Kato et al. (2002)                  | 11972033 Escherichia coli |
| Butland et al. (2005)               | 15690043 Escherichia coli |
| Butland et al. (2005)               | 15690043 Escherichia coli |
| Butland et al. (2005)               | 15690043 Escherichia coli |
| Arifuzzaman et al. (2006)           | 16606699 Escherichia coli |
| Butland et al. (2005)               | 15690043 Escherichia coli |
| Arifuzzaman et al. (2006)           | 16606699 Escherichia coli |





Butland et al. (2005) 15690043 Escherichia coli  
Butland et al. (2005) 15690043 Escherichia coli

Arifuzzaman et al. (2006) 16606699 Escherichia coli  
Arifuzzaman et al. (2006) 16606699 Escherichia coli

Arifuzzaman et al. (2006) 16606699 Escherichia coli  
Arifuzzaman et al. (2006) 16606699 Escherichia coli  
Arifuzzaman et al. (2006) 16606699 Escherichia coli  
Arifuzzaman et al. (2006) 16606699 Escherichia coli  
Arifuzzaman et al. (2006) 16606699 Escherichia coli

Arifuzzaman et al. (2006) 16606699 Escherichia coli  
Arifuzzaman et al. (2006) 16606699 Escherichia coli

Arifuzzaman et al. (2006) 16606699 Escherichia coli  
Lasserre et al. (2006) 16858726 Escherichia coli

Arifuzzaman et al. (2006) 16606699 Escherichia coli  
Arifuzzaman et al. (2006) 16606699 Escherichia coli  
Arifuzzaman et al. (2006) 16606699 Escherichia coli  
Arifuzzaman et al. (2006) 16606699 Escherichia coli  
Arifuzzaman et al. (2006) 16606699 Escherichia coli  
Arifuzzaman et al. (2006) 16606699 Escherichia coli  
Arifuzzaman et al. (2006) 16606699 Escherichia coli  
Arifuzzaman et al. (2006) 16606699 Escherichia coli  
Arifuzzaman et al. (2006) 16606699 Escherichia coli  
Arifuzzaman et al. (2006) 16606699 Escherichia coli  
Arifuzzaman et al. (2006) 16606699 Escherichia coli  
Arifuzzaman et al. (2006) 16606699 Escherichia coli  
Arifuzzaman et al. (2006) 16606699 Escherichia coli  
Arifuzzaman et al. (2006) 16606699 Escherichia coli  
Arifuzzaman et al. (2006) 16606699 Escherichia coli

Butland et al. (2005) 15690043 Escherichia coli



|                           |          |                  |
|---------------------------|----------|------------------|
| Arifuzzaman et al. (2006) | 16606699 | Escherichia coli |
| Butland et al. (2005)     | 15690043 | Escherichia coli |
| Arifuzzaman et al. (2006) | 16606699 | Escherichia coli |
| Arifuzzaman et al. (2006) | 16606699 | Escherichia coli |
| Arifuzzaman et al. (2006) | 16606699 | Escherichia coli |
| Butland et al. (2005)     | 15690043 | Escherichia coli |
| Butland et al. (2005)     | 15690043 | Escherichia coli |
| Butland et al. (2005)     | 15690043 | Escherichia coli |
| Arifuzzaman et al. (2006) | 16606699 | Escherichia coli |
| Butland et al. (2005)     | 15690043 | Escherichia coli |
| Butland et al. (2005)     | 15690043 | Escherichia coli |

|                           |          |                  |
|---------------------------|----------|------------------|
| Arifuzzaman et al. (2006) | 16606699 | Escherichia coli |
| Arifuzzaman et al. (2006) | 16606699 | Escherichia coli |
| Butland et al. (2005)     | 15690043 | Escherichia coli |
| Butland et al. (2005)     | 15690043 | Escherichia coli |
| Arifuzzaman et al. (2006) | 16606699 | Escherichia coli |
| Butland et al. (2005)     | 15690043 | Escherichia coli |
| Butland et al. (2005)     | 15690043 | Escherichia coli |
| Butland et al. (2005)     | 15690043 | Escherichia coli |
| Butland et al. (2005)     | 15690043 | Escherichia coli |
| Butland et al. (2005)     | 15690043 | Escherichia coli |
| Butland et al. (2005)     | 15690043 | Escherichia coli |
| Butland et al. (2005)     | 15690043 | Escherichia coli |
| Butland et al. (2005)     | 15690043 | Escherichia coli |
| Butland et al. (2005)     | 15690043 | Escherichia coli |
| Butland et al. (2005)     | 15690043 | Escherichia coli |
| Butland et al. (2005)     | 15690043 | Escherichia coli |
| Butland et al. (2005)     | 15690043 | Escherichia coli |
| Arifuzzaman et al. (2006) | 16606699 | Escherichia coli |
| Arifuzzaman et al. (2006) | 16606699 | Escherichia coli |
| Butland et al. (2005)     | 15690043 | Escherichia coli |
| Butland et al. (2005)     | 15690043 | Escherichia coli |

|                        |               |                  |
|------------------------|---------------|------------------|
| Watanabe et al. (2006) | imex:IM-14504 | Escherichia coli |
| Stenberg et al. (2005) | 16079137      | Escherichia coli |

|                           |          |                  |
|---------------------------|----------|------------------|
| Arifuzzaman et al. (2006) | 16606699 | Escherichia coli |
| Butland et al. (2005)     | 15690043 | Escherichia coli |
| Butland et al. (2005)     | 15690043 | Escherichia coli |
| Arifuzzaman et al. (2006) | 16606699 | Escherichia coli |
| Butland et al. (2005)     | 15690043 | Escherichia coli |







|                       |          |                  |
|-----------------------|----------|------------------|
| Butland et al. (2005) | 15690043 | Escherichia coli |
| Butland et al. (2005) | 15690043 | Escherichia coli |
| Butland et al. (2005) | 15690043 | Escherichia coli |
| Butland et al. (2005) | 15690043 | Escherichia coli |
| Butland et al. (2005) | 15690043 | Escherichia coli |
| Butland et al. (2005) | 15690043 | Escherichia coli |
| Butland et al. (2005) | 15690043 | Escherichia coli |
| Butland et al. (2005) | 15690043 | Escherichia coli |
| Butland et al. (2005) | 15690043 | Escherichia coli |
| Butland et al. (2005) | 15690043 | Escherichia coli |

|                           |          |                  |
|---------------------------|----------|------------------|
| Arifuzzaman et al. (2006) | 16606699 | Escherichia coli |
| Arifuzzaman et al. (2006) | 16606699 | Escherichia coli |
| Arifuzzaman et al. (2006) | 16606699 | Escherichia coli |
| Arifuzzaman et al. (2006) | 16606699 | Escherichia coli |
| Arifuzzaman et al. (2006) | 16606699 | Escherichia coli |
| Arifuzzaman et al. (2006) | 16606699 | Escherichia coli |
| Butland et al. (2005)     | 15690043 | Escherichia coli |
| Arifuzzaman et al. (2006) | 16606699 | Escherichia coli |
| Arifuzzaman et al. (2006) | 16606699 | Escherichia coli |
| Butland et al. (2005)     | 15690043 | Escherichia coli |
| Butland et al. (2005)     | 15690043 | Escherichia coli |
| Arifuzzaman et al. (2006) | 16606699 | Escherichia coli |
| Butland et al. (2005)     | 15690043 | Escherichia coli |
| Arifuzzaman et al. (2006) | 16606699 | Escherichia coli |
| Arifuzzaman et al. (2006) | 16606699 | Escherichia coli |
| Arifuzzaman et al. (2006) | 16606699 | Escherichia coli |
| Arifuzzaman et al. (2006) | 16606699 | Escherichia coli |
| Arifuzzaman et al. (2006) | 16606699 | Escherichia coli |
| Arifuzzaman et al. (2006) | 16606699 | Escherichia coli |
| Arifuzzaman et al. (2006) | 16606699 | Escherichia coli |

|                           |          |                  |
|---------------------------|----------|------------------|
| Arifuzzaman et al. (2006) | 16606699 | Escherichia coli |
|---------------------------|----------|------------------|

|            |              |                  |
|------------|--------------|------------------|
| Pan et al. | imex:IM-9154 | Escherichia coli |
|------------|--------------|------------------|

|                           |          |                  |
|---------------------------|----------|------------------|
| Arifuzzaman et al. (2006) | 16606699 | Escherichia coli |
| Arifuzzaman et al. (2006) | 16606699 | Escherichia coli |

|                           |              |                  |
|---------------------------|--------------|------------------|
| Arifuzzaman et al. (2006) | 16606699     | Escherichia coli |
| Arifuzzaman et al. (2006) | 16606699     | Escherichia coli |
| Pan et al.                | imex:IM-9154 | Escherichia coli |
| Pan et al.                | imex:IM-9154 | Escherichia coli |
| Pan et al.                | imex:IM-9154 | Escherichia coli |
| Stenberg et al. (2005)    | 16079137     | Escherichia coli |
| Stenberg et al. (2005)    | 16079137     | Escherichia coli |
| Butland et al. (2005)     | 15690043     | Escherichia coli |
| Butland et al. (2005)     | 15690043     | Escherichia coli |
| Arifuzzaman et al. (2006) | 16606699     | Escherichia coli |
| Arifuzzaman et al. (2006) | 16606699     | Escherichia coli |
| Butland et al. (2005)     | 15690043     | Escherichia coli |
| Arifuzzaman et al. (2006) | 16606699     | Escherichia coli |
| Arifuzzaman et al. (2006) | 16606699     | Escherichia coli |
| Arifuzzaman et al. (2006) | 16606699     | Escherichia coli |
| Arifuzzaman et al. (2006) | 16606699     | Escherichia coli |
| Arifuzzaman et al. (2006) | 16606699     | Escherichia coli |
| Arifuzzaman et al. (2006) | 16606699     | Escherichia coli |
| Arifuzzaman et al. (2006) | 16606699     | Escherichia coli |
| Arifuzzaman et al. (2006) | 16606699     | Escherichia coli |
| Arifuzzaman et al. (2006) | 16606699     | Escherichia coli |
| Butland et al. (2005)     | 15690043     | Escherichia coli |
| Butland et al. (2005)     | 15690043     | Escherichia coli |
| Butland et al. (2005)     | 15690043     | Escherichia coli |
| Butland et al. (2005)     | 15690043     | Escherichia coli |
| Butland et al. (2005)     | 15690043     | Escherichia coli |
| Butland et al. (2005)     | 15690043     | Escherichia coli |
| Arifuzzaman et al. (2006) | 16606699     | Escherichia coli |
| Rajagopala et al. (2009)  | 19834901     | Escherichia coli |
| Rajagopala et al. (2009)  | 19834901     | Escherichia coli |
| Rajagopala et al. (2009)  | 19834901     | Escherichia coli |
| Rajagopala et al. (2009)  | 19834901     | Escherichia coli |
| Arifuzzaman et al. (2006) | 16606699     | Escherichia coli |
| Butland et al. (2005)     | 15690043     | Escherichia coli |
| Arifuzzaman et al. (2006) | 16606699     | Escherichia coli |
| Arifuzzaman et al. (2006) | 16606699     | Escherichia coli |
| Butland et al. (2005)     | 15690043     | Escherichia coli |
| Butland et al. (2005)     | 15690043     | Escherichia coli |



|                           |                           |
|---------------------------|---------------------------|
| Butland et al. (2005)     | 15690043 Escherichia coli |
| Arifuzzaman et al. (2006) | 16606699 Escherichia coli |
| Butland et al. (2005)     | 15690043 Escherichia coli |
| Rajagopala et al. (2009)  | 19834901 Escherichia coli |
| Arifuzzaman et al. (2006) | 16606699 Escherichia coli |
|                           |                           |
| Arifuzzaman et al. (2006) | 16606699 Escherichia coli |
|                           |                           |
| Arifuzzaman et al. (2006) | 16606699 Escherichia coli |
| Arifuzzaman et al. (2006) | 16606699 Escherichia coli |
| Arifuzzaman et al. (2006) | 16606699 Escherichia coli |
| Arifuzzaman et al. (2006) | 16606699 Escherichia coli |
| Butland et al. (2005)     | 15690043 Escherichia coli |
| Arifuzzaman et al. (2006) | 16606699 Escherichia coli |
| Butland et al. (2005)     | 15690043 Escherichia coli |
|                           |                           |
| Arifuzzaman et al. (2006) | 16606699 Escherichia coli |
| Arifuzzaman et al. (2006) | 16606699 Escherichia coli |
| Butland et al. (2005)     | 15690043 Escherichia coli |
| Butland et al. (2005)     | 15690043 Escherichia coli |
| Butland et al. (2005)     | 15690043 Escherichia coli |
| Butland et al. (2005)     | 15690043 Escherichia coli |
| Arifuzzaman et al. (2006) | 16606699 Escherichia coli |
| Arifuzzaman et al. (2006) | 16606699 Escherichia coli |
| Butland et al. (2005)     | 15690043 Escherichia coli |
| Butland et al. (2005)     | 15690043 Escherichia coli |
| Arifuzzaman et al. (2006) | 16606699 Escherichia coli |
| Arifuzzaman et al. (2006) | 16606699 Escherichia coli |
|                           |                           |
| Arifuzzaman et al. (2006) | 16606699 Escherichia coli |
| Arifuzzaman et al. (2006) | 16606699 Escherichia coli |
| Arifuzzaman et al. (2006) | 16606699 Escherichia coli |
| Arifuzzaman et al. (2006) | 16606699 Escherichia coli |
| Arifuzzaman et al. (2006) | 16606699 Escherichia coli |
| Arifuzzaman et al. (2006) | 16606699 Escherichia coli |
| Arifuzzaman et al. (2006) | 16606699 Escherichia coli |
| Arifuzzaman et al. (2006) | 16606699 Escherichia coli |
|                           |                           |
| Arifuzzaman et al. (2006) | 16606699 Escherichia coli |
| Arifuzzaman et al. (2006) | 16606699 Escherichia coli |
| Arifuzzaman et al. (2006) | 16606699 Escherichia coli |









|                           |               |                  |
|---------------------------|---------------|------------------|
| Arifuzzaman et al. (2006) | 16606699      | Escherichia coli |
| Butland et al. (2005)     | 15690043      | Escherichia coli |
| Butland et al. (2005)     | 15690043      | Escherichia coli |
| Butland et al. (2005)     | 15690043      | Escherichia coli |
| Butland et al. (2005)     | 15690043      | Escherichia coli |
| Oishi et al. (2006)       | imex:IM-11849 | Escherichia coli |
| Woo et al. (2009)         | 19135891      | Escherichia coli |
| Arifuzzaman et al. (2006) | 16606699      | Escherichia coli |
| Arifuzzaman et al. (2006) | 16606699      | Escherichia coli |
| Arifuzzaman et al. (2006) | 16606699      | Escherichia coli |
| Arifuzzaman et al. (2006) | 16606699      | Escherichia coli |

|                           |          |                  |
|---------------------------|----------|------------------|
| Butland et al. (2005)     | 15690043 | Escherichia coli |
| Butland et al. (2005)     | 15690043 | Escherichia coli |
| Butland et al. (2005)     | 15690043 | Escherichia coli |
| Arifuzzaman et al. (2006) | 16606699 | Escherichia coli |
| Arifuzzaman et al. (2006) | 16606699 | Escherichia coli |
| Arifuzzaman et al. (2006) | 16606699 | Escherichia coli |
| Butland et al. (2005)     | 15690043 | Escherichia coli |
| Butland et al. (2005)     | 15690043 | Escherichia coli |
| Butland et al. (2005)     | 15690043 | Escherichia coli |
| Butland et al. (2005)     | 15690043 | Escherichia coli |
| Butland et al. (2005)     | 15690043 | Escherichia coli |
| Butland et al. (2005)     | 15690043 | Escherichia coli |
| Butland et al. (2005)     | 15690043 | Escherichia coli |
| Butland et al. (2005)     | 15690043 | Escherichia coli |
| Butland et al. (2005)     | 15690043 | Escherichia coli |
| Butland et al. (2005)     | 15690043 | Escherichia coli |
| Butland et al. (2005)     | 15690043 | Escherichia coli |
| Arifuzzaman et al. (2006) | 16606699 | Escherichia coli |
| Arifuzzaman et al. (2006) | 16606699 | Escherichia coli |
| Butland et al. (2005)     | 15690043 | Escherichia coli |
| Butland et al. (2005)     | 15690043 | Escherichia coli |

|                           |          |                  |
|---------------------------|----------|------------------|
| Arifuzzaman et al. (2006) | 16606699 | Escherichia coli |
| Butland et al. (2005)     | 15690043 | Escherichia coli |
| Arifuzzaman et al. (2006) | 16606699 | Escherichia coli |
| Arifuzzaman et al. (2006) | 16606699 | Escherichia coli |
| Mansour et al. (2001)     | 11585365 | Escherichia coli |

|                           |          |                  |
|---------------------------|----------|------------------|
| Butland et al. (2005)     | 15690043 | Escherichia coli |
| Butland et al. (2005)     | 15690043 | Escherichia coli |
| Arifuzzaman et al. (2006) | 16606699 | Escherichia coli |

|                           |                           |
|---------------------------|---------------------------|
| Arifuzzaman et al. (2006) | 16606699 Escherichia coli |
| Arifuzzaman et al. (2006) | 16606699 Escherichia coli |
| Arifuzzaman et al. (2006) | 16606699 Escherichia coli |
| Arifuzzaman et al. (2006) | 16606699 Escherichia coli |
| Arifuzzaman et al. (2006) | 16606699 Escherichia coli |

|                           |                           |
|---------------------------|---------------------------|
| Arifuzzaman et al. (2006) | 16606699 Escherichia coli |
| Arifuzzaman et al. (2006) | 16606699 Escherichia coli |
| Arifuzzaman et al. (2006) | 16606699 Escherichia coli |

|                           |                           |
|---------------------------|---------------------------|
| Butland et al. (2005)     | 15690043 Escherichia coli |
| Butland et al. (2005)     | 15690043 Escherichia coli |
| Butland et al. (2005)     | 15690043 Escherichia coli |
| Butland et al. (2005)     | 15690043 Escherichia coli |
| Banci et al. (2005)       | 15670166 Escherichia coli |
| Banci et al. (2005)       | 15670166 Escherichia coli |
| Banci et al. (2005)       | 15670166 Escherichia coli |
| Banci et al. (2005)       | 15670166 Escherichia coli |
| Bertero et al. (2003)     | 12910261 Escherichia coli |
| Rothery et al. (2004)     | 15122898 Escherichia coli |
| Banci et al. (2005)       | 15670166 Escherichia coli |
| Banci et al. (2005)       | 15670166 Escherichia coli |
| Banci et al. (2005)       | 15670166 Escherichia coli |
| Banci et al. (2005)       | 15670166 Escherichia coli |
| Bertero et al. (2003)     | 12910261 Escherichia coli |
| Rothery et al. (2004)     | 15122898 Escherichia coli |
| Butland et al. (2005)     | 15690043 Escherichia coli |
| Butland et al. (2005)     | 15690043 Escherichia coli |
| Butland et al. (2005)     | 15690043 Escherichia coli |
| Butland et al. (2005)     | 15690043 Escherichia coli |
| Arifuzzaman et al. (2006) | 16606699 Escherichia coli |

|                           |                           |
|---------------------------|---------------------------|
| Butland et al. (2005)     | 15690043 Escherichia coli |
| Butland et al. (2005)     | 15690043 Escherichia coli |
| Arifuzzaman et al. (2006) | 16606699 Escherichia coli |
| Lasserre et al. (2006)    | 16858726 Escherichia coli |
| Butland et al. (2005)     | 15690043 Escherichia coli |
| Butland et al. (2005)     | 15690043 Escherichia coli |
| Lasserre et al. (2006)    | 16858726 Escherichia coli |
| Arifuzzaman et al. (2006) | 16606699 Escherichia coli |





|                           |                           |
|---------------------------|---------------------------|
| Arifuzzaman et al. (2006) | 16606699 Escherichia coli |
| Salinas et al. (2003)     | 12838411 Escherichia coli |
| Arifuzzaman et al. (2006) | 16606699 Escherichia coli |
| Butland et al. (2005)     | 15690043 Escherichia coli |
| Butland et al. (2005)     | 15690043 Escherichia coli |
| Arifuzzaman et al. (2006) | 16606699 Escherichia coli |
| Butland et al. (2005)     | 15690043 Escherichia coli |
| Arifuzzaman et al. (2006) | 16606699 Escherichia coli |
| Arifuzzaman et al. (2006) | 16606699 Escherichia coli |
| Arifuzzaman et al. (2006) | 16606699 Escherichia coli |
| Arifuzzaman et al. (2006) | 16606699 Escherichia coli |
| Arifuzzaman et al. (2006) | 16606699 Escherichia coli |
| Arifuzzaman et al. (2006) | 16606699 Escherichia coli |
| Arifuzzaman et al. (2006) | 16606699 Escherichia coli |
| Lasserre et al. (2006)    | 16858726 Escherichia coli |
| Stenberg et al. (2005)    | 16079137 Escherichia coli |
| Arifuzzaman et al. (2006) | 16606699 Escherichia coli |
| Arifuzzaman et al. (2006) | 16606699 Escherichia coli |
| Arifuzzaman et al. (2006) | 16606699 Escherichia coli |
| Arifuzzaman et al. (2006) | 16606699 Escherichia coli |
| Arifuzzaman et al. (2006) | 16606699 Escherichia coli |
| Arifuzzaman et al. (2006) | 16606699 Escherichia coli |
| Arifuzzaman et al. (2006) | 16606699 Escherichia coli |
| Arifuzzaman et al. (2006) | 16606699 Escherichia coli |
| Butland et al. (2005)     | 15690043 Escherichia coli |
| Arifuzzaman et al. (2006) | 16606699 Escherichia coli |
| Butland et al. (2005)     | 15690043 Escherichia coli |
| Butland et al. (2005)     | 15690043 Escherichia coli |
| Arifuzzaman et al. (2006) | 16606699 Escherichia coli |





Arifuzzaman et al. (2006) 16606699 Escherichia coli  
Arifuzzaman et al. (2006) 16606699 Escherichia coli

Arifuzzaman et al. (2006) 16606699 Escherichia coli  
Arifuzzaman et al. (2006) 16606699 Escherichia coli

Arifuzzaman et al. (2006) 16606699 Escherichia coli  
Arifuzzaman et al. (2006) 16606699 Escherichia coli  
Arifuzzaman et al. (2006) 16606699 Escherichia coli  
Arifuzzaman et al. (2006) 16606699 Escherichia coli

Arifuzzaman et al. (2006) 16606699 Escherichia coli  
Arifuzzaman et al. (2006) 16606699 Escherichia coli  
Arifuzzaman et al. (2006) 16606699 Escherichia coli  
Arifuzzaman et al. (2006) 16606699 Escherichia coli  
Arifuzzaman et al. (2006) 16606699 Escherichia coli  
Arifuzzaman et al. (2006) 16606699 Escherichia coli  
Arifuzzaman et al. (2006) 16606699 Escherichia coli  
Arifuzzaman et al. (2006) 16606699 Escherichia coli  
Arifuzzaman et al. (2006) 16606699 Escherichia coli

Arifuzzaman et al. (2006) 16606699 Escherichia coli  
Arifuzzaman et al. (2006) 16606699 Escherichia coli

Arifuzzaman et al. (2006) 16606699 Escherichia coli  
Arifuzzaman et al. (2006) 16606699 Escherichia coli  
Butland et al. (2005) 15690043 Escherichia coli  
Butland et al. (2005) 15690043 Escherichia coli  
Butland et al. (2005) 15690043 Escherichia coli  
Arifuzzaman et al. (2006) 16606699 Escherichia coli  
Butland et al. (2005) 15690043 Escherichia coli  
Butland et al. (2005) 15690043 Escherichia coli

Butland et al. (2005) 15690043 Escherichia coli  
Butland et al. (2005) 15690043 Escherichia coli



|                           |              |                  |
|---------------------------|--------------|------------------|
| Arifuzzaman et al. (2006) | 16606699     | Escherichia coli |
| Arifuzzaman et al. (2006) | 16606699     | Escherichia coli |
| Butland et al. (2005)     | 15690043     | Escherichia coli |
| Arifuzzaman et al. (2006) | 16606699     | Escherichia coli |
| Butland et al. (2005)     | 15690043     | Escherichia coli |
| Butland et al. (2005)     | 15690043     | Escherichia coli |
| Butland et al. (2005)     | 15690043     | Escherichia coli |
| Arifuzzaman et al. (2006) | 16606699     | Escherichia coli |
| Butland et al. (2005)     | 15690043     | Escherichia coli |
| Pan et al.                | imex:IM-9154 | Escherichia coli |
| Arifuzzaman et al. (2006) | 16606699     | Escherichia coli |
| Arifuzzaman et al. (2006) | 16606699     | Escherichia coli |
| Arifuzzaman et al. (2006) | 16606699     | Escherichia coli |
| Butland et al. (2005)     | 15690043     | Escherichia coli |
| Butland et al. (2005)     | 15690043     | Escherichia coli |
| Butland et al. (2005)     | 15690043     | Escherichia coli |
| Arifuzzaman et al. (2006) | 16606699     | Escherichia coli |
| Arifuzzaman et al. (2006) | 16606699     | Escherichia coli |
| Arifuzzaman et al. (2006) | 16606699     | Escherichia coli |
| Butland et al. (2005)     | 15690043     | Escherichia coli |
| Butland et al. (2005)     | 15690043     | Escherichia coli |
| Butland et al. (2005)     | 15690043     | Escherichia coli |
| Arifuzzaman et al. (2006) | 16606699     | Escherichia coli |
| Butland et al. (2005)     | 15690043     | Escherichia coli |
| Arifuzzaman et al. (2006) | 16606699     | Escherichia coli |
| Arifuzzaman et al. (2006) | 16606699     | Escherichia coli |
| Butland et al. (2005)     | 15690043     | Escherichia coli |
| Butland et al. (2005)     | 15690043     | Escherichia coli |
| Butland et al. (2005)     | 15690043     | Escherichia coli |
| Arifuzzaman et al. (2006) | 16606699     | Escherichia coli |
| Butland et al. (2005)     | 15690043     | Escherichia coli |
| Arifuzzaman et al. (2006) | 16606699     | Escherichia coli |
| Arifuzzaman et al. (2006) | 16606699     | Escherichia coli |
| Butland et al. (2005)     | 15690043     | Escherichia coli |
| Butland et al. (2005)     | 15690043     | Escherichia coli |
| Butland et al. (2005)     | 15690043     | Escherichia coli |
| Butland et al. (2005)     | 15690043     | Escherichia coli |

































|                           |                           |
|---------------------------|---------------------------|
| Arifuzzaman et al. (2006) | 16606699 Escherichia coli |
| Arifuzzaman et al. (2006) | 16606699 Escherichia coli |
| Arifuzzaman et al. (2006) | 16606699 Escherichia coli |
| Arifuzzaman et al. (2006) | 16606699 Escherichia coli |

|                           |                           |
|---------------------------|---------------------------|
| Arifuzzaman et al. (2006) | 16606699 Escherichia coli |
| Arifuzzaman et al. (2006) | 16606699 Escherichia coli |
| Arifuzzaman et al. (2006) | 16606699 Escherichia coli |

|                       |                           |
|-----------------------|---------------------------|
| Butland et al. (2005) | 15690043 Escherichia coli |
|-----------------------|---------------------------|

|                           |                           |
|---------------------------|---------------------------|
| Arifuzzaman et al. (2006) | 16606699 Escherichia coli |
|---------------------------|---------------------------|

|                           |                           |
|---------------------------|---------------------------|
| Arifuzzaman et al. (2006) | 16606699 Escherichia coli |
|---------------------------|---------------------------|

|                           |                           |
|---------------------------|---------------------------|
| Arifuzzaman et al. (2006) | 16606699 Escherichia coli |
| Arifuzzaman et al. (2006) | 16606699 Escherichia coli |
| Arifuzzaman et al. (2006) | 16606699 Escherichia coli |
| Arifuzzaman et al. (2006) | 16606699 Escherichia coli |

|                           |                           |
|---------------------------|---------------------------|
| Arifuzzaman et al. (2006) | 16606699 Escherichia coli |
| Arifuzzaman et al. (2006) | 16606699 Escherichia coli |
| Arifuzzaman et al. (2006) | 16606699 Escherichia coli |
| Arifuzzaman et al. (2006) | 16606699 Escherichia coli |
| Arifuzzaman et al. (2006) | 16606699 Escherichia coli |
| Arifuzzaman et al. (2006) | 16606699 Escherichia coli |
| Arifuzzaman et al. (2006) | 16606699 Escherichia coli |

|                           |                           |
|---------------------------|---------------------------|
| Arifuzzaman et al. (2006) | 16606699 Escherichia coli |
| Arifuzzaman et al. (2006) | 16606699 Escherichia coli |
| Arifuzzaman et al. (2006) | 16606699 Escherichia coli |
| Arifuzzaman et al. (2006) | 16606699 Escherichia coli |

















































|                           |                           |
|---------------------------|---------------------------|
| Arifuzzaman et al. (2006) | 16606699 Escherichia coli |
| Arifuzzaman et al. (2006) | 16606699 Escherichia coli |
| Mason et al. (1992)       | 1731086 Escherichia coli  |
| Mason et al. (1992)       | 1731086 Escherichia coli  |
| Mason et al. (1992)       | 1731086 Escherichia coli  |
| Arifuzzaman et al. (2006) | 16606699 Escherichia coli |
| Arifuzzaman et al. (2006) | 16606699 Escherichia coli |
| Arifuzzaman et al. (2006) | 16606699 Escherichia coli |
| Arifuzzaman et al. (2006) | 16606699 Escherichia coli |
| Arifuzzaman et al. (2006) | 16606699 Escherichia coli |
| Arifuzzaman et al. (2006) | 16606699 Escherichia coli |
| Arifuzzaman et al. (2006) | 16606699 Escherichia coli |
| Arifuzzaman et al. (2006) | 16606699 Escherichia coli |
| Arifuzzaman et al. (2006) | 16606699 Escherichia coli |
| Arifuzzaman et al. (2006) | 16606699 Escherichia coli |
| Arifuzzaman et al. (2006) | 16606699 Escherichia coli |
| Arifuzzaman et al. (2006) | 16606699 Escherichia coli |
| Arifuzzaman et al. (2006) | 16606699 Escherichia coli |
| Arifuzzaman et al. (2006) | 16606699 Escherichia coli |
| Arifuzzaman et al. (2006) | 16606699 Escherichia coli |
| Arifuzzaman et al. (2006) | 16606699 Escherichia coli |
| Arifuzzaman et al. (2006) | 16606699 Escherichia coli |
| Arifuzzaman et al. (2006) | 16606699 Escherichia coli |
| Arifuzzaman et al. (2006) | 16606699 Escherichia coli |
| Rajagopala et al. (2009)  | 19834901 Escherichia coli |
| Rajagopala et al. (2009)  | 19834901 Escherichia coli |
| Rajagopala et al. (2009)  | 19834901 Escherichia coli |
| Arifuzzaman et al. (2006) | 16606699 Escherichia coli |
| Arifuzzaman et al. (2006) | 16606699 Escherichia coli |







|                           |                           |
|---------------------------|---------------------------|
| Arifuzzaman et al. (2006) | 16606699 Escherichia coli |
| Arifuzzaman et al. (2006) | 16606699 Escherichia coli |
| Arifuzzaman et al. (2006) | 16606699 Escherichia coli |
| Arifuzzaman et al. (2006) | 16606699 Escherichia coli |
| Butland et al. (2005)     | 15690043 Escherichia coli |
| Butland et al. (2005)     | 15690043 Escherichia coli |
| Butland et al. (2005)     | 15690043 Escherichia coli |
| Butland et al. (2005)     | 15690043 Escherichia coli |
| Butland et al. (2005)     | 15690043 Escherichia coli |
| Butland et al. (2005)     | 15690043 Escherichia coli |
| Butland et al. (2005)     | 15690043 Escherichia coli |
| Butland et al. (2005)     | 15690043 Escherichia coli |
| Butland et al. (2005)     | 15690043 Escherichia coli |
| Butland et al. (2005)     | 15690043 Escherichia coli |
| Butland et al. (2005)     | 15690043 Escherichia coli |
| Butland et al. (2005)     | 15690043 Escherichia coli |
| Butland et al. (2005)     | 15690043 Escherichia coli |
| Butland et al. (2005)     | 15690043 Escherichia coli |
| Butland et al. (2005)     | 15690043 Escherichia coli |
| Butland et al. (2005)     | 15690043 Escherichia coli |
| Butland et al. (2005)     | 15690043 Escherichia coli |
| Butland et al. (2005)     | 15690043 Escherichia coli |
| Stenberg et al. (2005)    | 16079137 Escherichia coli |
| Butland et al. (2005)     | 15690043 Escherichia coli |
| Butland et al. (2005)     | 15690043 Escherichia coli |
| Snyders et al. (1997)     | 9111035 Escherichia coli  |
| Butland et al. (2005)     | 15690043 Escherichia coli |
| Butland et al. (2005)     | 15690043 Escherichia coli |
| Lasserre et al. (2006)    | 16858726 Escherichia coli |
| Lasserre et al. (2006)    | 16858726 Escherichia coli |
| Butland et al. (2005)     | 15690043 Escherichia coli |
| Butland et al. (2005)     | 15690043 Escherichia coli |
| Butland et al. (2005)     | 15690043 Escherichia coli |
| Arifuzzaman et al. (2006) | 16606699 Escherichia coli |
| Arifuzzaman et al. (2006) | 16606699 Escherichia coli |
| Butland et al. (2005)     | 15690043 Escherichia coli |
| Arifuzzaman et al. (2006) | 16606699 Escherichia coli |
| Butland et al. (2005)     | 15690043 Escherichia coli |
| Arifuzzaman et al. (2006) | 16606699 Escherichia coli |





Arifuzzaman et al. (2006) 16606699 Escherichia coli  
Arifuzzaman et al. (2006) 16606699 Escherichia coli  
Arifuzzaman et al. (2006) 16606699 Escherichia coli  
Arifuzzaman et al. (2006) 16606699 Escherichia coli

Arifuzzaman et al. (2006) 16606699 Escherichia coli

Arifuzzaman et al. (2006) 16606699 Escherichia coli

Arifuzzaman et al. (2006) 16606699 Escherichia coli  
Arifuzzaman et al. (2006) 16606699 Escherichia coli

Butland et al. (2005) 15690043 Escherichia coli  
Butland et al. (2005) 15690043 Escherichia coli  
Butland et al. (2005) 15690043 Escherichia coli  
Butland et al. (2005) 15690043 Escherichia coli  
Butland et al. (2005) 15690043 Escherichia coli  
Butland et al. (2005) 15690043 Escherichia coli  
Butland et al. (2005) 15690043 Escherichia coli  
Butland et al. (2005) 15690043 Escherichia coli  
Butland et al. (2005) 15690043 Escherichia coli  
Butland et al. (2005) 15690043 Escherichia coli  
Butland et al. (2005) 15690043 Escherichia coli  
Butland et al. (2005) 15690043 Escherichia coli  
Butland et al. (2005) 15690043 Escherichia coli

Stenberg et al. (2005) 16079137 Escherichia coli

Arifuzzaman et al. (2006) 16606699 Escherichia coli  
Butland et al. (2005) 15690043 Escherichia coli  
Butland et al. (2005) 15690043 Escherichia coli  
Arifuzzaman et al. (2006) 16606699 Escherichia coli  
Butland et al. (2005) 15690043 Escherichia coli  
Butland et al. (2005) 15690043 Escherichia coli  
Butland et al. (2006) 16412426 Escherichia coli





















|                           |          |                  |
|---------------------------|----------|------------------|
| Butland et al. (2005)     | 15690043 | Escherichia coli |
| Butland et al. (2005)     | 15690043 | Escherichia coli |
| Butland et al. (2005)     | 15690043 | Escherichia coli |
| Butland et al. (2005)     | 15690043 | Escherichia coli |
| Butland et al. (2005)     | 15690043 | Escherichia coli |
| Arifuzzaman et al. (2006) | 16606699 | Escherichia coli |
| Butland et al. (2005)     | 15690043 | Escherichia coli |
| Butland et al. (2005)     | 15690043 | Escherichia coli |
| Butland et al. (2005)     | 15690043 | Escherichia coli |
| Butland et al. (2005)     | 15690043 | Escherichia coli |
| Arifuzzaman et al. (2006) | 16606699 | Escherichia coli |
| Butland et al. (2005)     | 15690043 | Escherichia coli |
| Butland et al. (2005)     | 15690043 | Escherichia coli |

|                           |          |                  |
|---------------------------|----------|------------------|
| Arifuzzaman et al. (2006) | 16606699 | Escherichia coli |
|---------------------------|----------|------------------|

|                           |          |                  |
|---------------------------|----------|------------------|
| Arifuzzaman et al. (2006) | 16606699 | Escherichia coli |
| Arifuzzaman et al. (2006) | 16606699 | Escherichia coli |
| Arifuzzaman et al. (2006) | 16606699 | Escherichia coli |
| Arifuzzaman et al. (2006) | 16606699 | Escherichia coli |
| Arifuzzaman et al. (2006) | 16606699 | Escherichia coli |
| Butland et al. (2005)     | 15690043 | Escherichia coli |
| Butland et al. (2005)     | 15690043 | Escherichia coli |
| Arifuzzaman et al. (2006) | 16606699 | Escherichia coli |
| Butland et al. (2005)     | 15690043 | Escherichia coli |
| Arifuzzaman et al. (2006) | 16606699 | Escherichia coli |
| Butland et al. (2005)     | 15690043 | Escherichia coli |
| Arifuzzaman et al. (2006) | 16606699 | Escherichia coli |

|                           |          |                  |
|---------------------------|----------|------------------|
| Arifuzzaman et al. (2006) | 16606699 | Escherichia coli |
| Arifuzzaman et al. (2006) | 16606699 | Escherichia coli |
| Butland et al. (2005)     | 15690043 | Escherichia coli |
| Butland et al. (2005)     | 15690043 | Escherichia coli |
| Arifuzzaman et al. (2006) | 16606699 | Escherichia coli |
| Butland et al. (2005)     | 15690043 | Escherichia coli |
| Butland et al. (2005)     | 15690043 | Escherichia coli |
| Butland et al. (2005)     | 15690043 | Escherichia coli |

|                           |          |                  |
|---------------------------|----------|------------------|
| Arifuzzaman et al. (2006) | 16606699 | Escherichia coli |
| Arifuzzaman et al. (2006) | 16606699 | Escherichia coli |

|            |              |                  |
|------------|--------------|------------------|
| Pan et al. | imex:IM-9154 | Escherichia coli |
|------------|--------------|------------------|









|                     |          |                  |
|---------------------|----------|------------------|
| Kumar et al. (2004) | 15004283 | Escherichia coli |
| Kumar et al. (2004) | 15004283 | Escherichia coli |
| Kumar et al. (2004) | 15004283 | Escherichia coli |
| Kumar et al. (2004) | 15004283 | Escherichia coli |
| Kumar et al. (2004) | 15004283 | Escherichia coli |
| Kumar et al. (2004) | 15004283 | Escherichia coli |
| Kumar et al. (2004) | 15004283 | Escherichia coli |
| Kumar et al. (2004) | 15004283 | Escherichia coli |
| Kumar et al. (2004) | 15004283 | Escherichia coli |
| Kumar et al. (2004) | 15004283 | Escherichia coli |

|                           |          |                  |
|---------------------------|----------|------------------|
| Arifuzzaman et al. (2006) | 16606699 | Escherichia coli |
|---------------------------|----------|------------------|

|                                |               |                  |
|--------------------------------|---------------|------------------|
| Butland et al. (2005)          | 15690043      | Escherichia coli |
| Martinez-Hackert et al. (2009) | imex:IM-12086 | Escherichia coli |
| Martinez-Hackert et al. (2009) | imex:IM-12086 | Escherichia coli |
| Martinez-Hackert et al. (2009) | imex:IM-12086 | Escherichia coli |
| Butland et al. (2005)          | 15690043      | Escherichia coli |
| Martinez-Hackert et al. (2009) | imex:IM-12086 | Escherichia coli |
| Arifuzzaman et al. (2006)      | 16606699      | Escherichia coli |
| Martinez-Hackert et al. (2009) | imex:IM-12086 | Escherichia coli |
| Martinez-Hackert et al. (2009) | imex:IM-12086 | Escherichia coli |
| Martinez-Hackert et al. (2009) | imex:IM-12086 | Escherichia coli |
| Martinez-Hackert et al. (2009) | imex:IM-12086 | Escherichia coli |
| Butland et al. (2005)          | 15690043      | Escherichia coli |
| Arifuzzaman et al. (2006)      | 16606699      | Escherichia coli |
| Martinez-Hackert et al. (2009) | imex:IM-12086 | Escherichia coli |
| Arifuzzaman et al. (2006)      | 16606699      | Escherichia coli |
| Martinez-Hackert et al. (2009) | imex:IM-12086 | Escherichia coli |
| Arifuzzaman et al. (2006)      | 16606699      | Escherichia coli |
| Arifuzzaman et al. (2006)      | 16606699      | Escherichia coli |
| Martinez-Hackert et al. (2009) | imex:IM-12086 | Escherichia coli |
| Martinez-Hackert et al. (2009) | imex:IM-12086 | Escherichia coli |
| Martinez-Hackert et al. (2009) | imex:IM-12086 | Escherichia coli |
| Arifuzzaman et al. (2006)      | 16606699      | Escherichia coli |
| Arifuzzaman et al. (2006)      | 16606699      | Escherichia coli |
| Martinez-Hackert et al. (2009) | imex:IM-12086 | Escherichia coli |
| Martinez-Hackert et al. (2009) | imex:IM-12086 | Escherichia coli |
| Martinez-Hackert et al. (2009) | imex:IM-12086 | Escherichia coli |
| Martinez-Hackert et al. (2009) | imex:IM-12086 | Escherichia coli |
| Butland et al. (2005)          | 15690043      | Escherichia coli |







Butland et al. (2005) 15690043 Escherichia coli

Butland et al. (2005) 15690043 Escherichia coli

Butland et al. (2005) 15690043 Escherichia coli  
Butland et al. (2005) 15690043 Escherichia coli  
Butland et al. (2005) 15690043 Escherichia coli  
Rajagopala et al. (2009) 19834901 Escherichia coli  
Butland et al. (2005) 15690043 Escherichia coli  
Arifuzzaman et al. (2006) 16606699 Escherichia coli  
Butland et al. (2005) 15690043 Escherichia coli  
Arifuzzaman et al. (2006) 16606699 Escherichia coli  
Butland et al. (2005) 15690043 Escherichia coli  
Rajagopala et al. (2009) 19834901 Escherichia coli  
Butland et al. (2005) 15690043 Escherichia coli  
Rajagopala et al. (2009) 19834901 Escherichia coli  
Butland et al. (2005) 15690043 Escherichia coli  
Arifuzzaman et al. (2006) 16606699 Escherichia coli

|                           |                           |
|---------------------------|---------------------------|
| Arifuzzaman et al. (2006) | 16606699 Escherichia coli |
| Arifuzzaman et al. (2006) | 16606699 Escherichia coli |

|                           |                           |
|---------------------------|---------------------------|
| Arifuzzaman et al. (2006) | 16606699 Escherichia coli |
|---------------------------|---------------------------|

|                           |                           |
|---------------------------|---------------------------|
| Arifuzzaman et al. (2006) | 16606699 Escherichia coli |
| Arifuzzaman et al. (2006) | 16606699 Escherichia coli |
| Arifuzzaman et al. (2006) | 16606699 Escherichia coli |
| Arifuzzaman et al. (2006) | 16606699 Escherichia coli |
| Arifuzzaman et al. (2006) | 16606699 Escherichia coli |
| Arifuzzaman et al. (2006) | 16606699 Escherichia coli |
| Arifuzzaman et al. (2006) | 16606699 Escherichia coli |

|                           |                           |
|---------------------------|---------------------------|
| Arifuzzaman et al. (2006) | 16606699 Escherichia coli |
| Arifuzzaman et al. (2006) | 16606699 Escherichia coli |
| Arifuzzaman et al. (2006) | 16606699 Escherichia coli |
| Arifuzzaman et al. (2006) | 16606699 Escherichia coli |
| Arifuzzaman et al. (2006) | 16606699 Escherichia coli |
| Arifuzzaman et al. (2006) | 16606699 Escherichia coli |

|                           |                           |
|---------------------------|---------------------------|
| Arifuzzaman et al. (2006) | 16606699 Escherichia coli |
| Butland et al. (2005)     | 15690043 Escherichia coli |
| Butland et al. (2005)     | 15690043 Escherichia coli |
| Butland et al. (2005)     | 15690043 Escherichia coli |
| Butland et al. (2005)     | 15690043 Escherichia coli |
| Rajagopala et al. (2009)  | 19834901 Escherichia coli |
| Rajagopala et al. (2009)  | 19834901 Escherichia coli |
| Rajagopala et al. (2009)  | 19834901 Escherichia coli |
| Butland et al. (2005)     | 15690043 Escherichia coli |
| Butland et al. (2005)     | 15690043 Escherichia coli |
| Arifuzzaman et al. (2006) | 16606699 Escherichia coli |
| Butland et al. (2005)     | 15690043 Escherichia coli |
| Butland et al. (2005)     | 15690043 Escherichia coli |
| Butland et al. (2005)     | 15690043 Escherichia coli |



















Arifuzzaman et al. (2006) 16606699 Escherichia coli  
Arifuzzaman et al. (2006) 16606699 Escherichia coli

Arifuzzaman et al. (2006) 16606699 Escherichia coli  
Butland et al. (2005) 15690043 Escherichia coli  
Arifuzzaman et al. (2006) 16606699 Escherichia coli

Gully et al. (2006) 16294310 Escherichia coli  
Gully et al. (2006) 16294310 Escherichia coli  
Gully et al. (2006) 16294310 Escherichia coli  
Gully et al. (2006) 16294310 Escherichia coli  
Gully et al. (2006) 16294310 Escherichia coli  
Gully et al. (2006) 16294310 Escherichia coli  
Gully et al. (2006) 16294310 Escherichia coli  
Butland et al. (2005) 15690043 Escherichia coli  
Gully et al. (2006) 16294310 Escherichia coli  
Gully et al. (2006) 16294310 Escherichia coli  
Gully et al. (2006) 16294310 Escherichia coli  
Butland et al. (2005) 15690043 Escherichia coli

Arifuzzaman et al. (2006) 16606699 Escherichia coli  
Arifuzzaman et al. (2006) 16606699 Escherichia coli  
Arifuzzaman et al. (2006) 16606699 Escherichia coli  
Lasserre et al. (2006) 16858726 Escherichia coli  
Arifuzzaman et al. (2006) 16606699 Escherichia coli

Arifuzzaman et al. (2006) 16606699 Escherichia coli  
Arifuzzaman et al. (2006) 16606699 Escherichia coli  
Arifuzzaman et al. (2006) 16606699 Escherichia coli

Arifuzzaman et al. (2006) 16606699 Escherichia coli  
Arifuzzaman et al. (2006) 16606699 Escherichia coli  
Arifuzzaman et al. (2006) 16606699 Escherichia coli  
Arifuzzaman et al. (2006) 16606699 Escherichia coli

















|                           |                           |
|---------------------------|---------------------------|
| Butland et al. (2005)     | 15690043 Escherichia coli |
| Arifuzzaman et al. (2006) | 16606699 Escherichia coli |
| Arifuzzaman et al. (2006) | 16606699 Escherichia coli |
| Butland et al. (2005)     | 15690043 Escherichia coli |
| Arifuzzaman et al. (2006) | 16606699 Escherichia coli |
| Arifuzzaman et al. (2006) | 16606699 Escherichia coli |
| Arifuzzaman et al. (2006) | 16606699 Escherichia coli |
| Arifuzzaman et al. (2006) | 16606699 Escherichia coli |

|                           |                           |
|---------------------------|---------------------------|
| Arifuzzaman et al. (2006) | 16606699 Escherichia coli |
| Arifuzzaman et al. (2006) | 16606699 Escherichia coli |
| Butland et al. (2005)     | 15690043 Escherichia coli |
| Arifuzzaman et al. (2006) | 16606699 Escherichia coli |
| Arifuzzaman et al. (2006) | 16606699 Escherichia coli |
| Arifuzzaman et al. (2006) | 16606699 Escherichia coli |
| Arifuzzaman et al. (2006) | 16606699 Escherichia coli |
| Butland et al. (2005)     | 15690043 Escherichia coli |
| Arifuzzaman et al. (2006) | 16606699 Escherichia coli |
| Arifuzzaman et al. (2006) | 16606699 Escherichia coli |
| Arifuzzaman et al. (2006) | 16606699 Escherichia coli |
| Arifuzzaman et al. (2006) | 16606699 Escherichia coli |
| Arifuzzaman et al. (2006) | 16606699 Escherichia coli |
| Arifuzzaman et al. (2006) | 16606699 Escherichia coli |
| Butland et al. (2005)     | 15690043 Escherichia coli |
| Butland et al. (2005)     | 15690043 Escherichia coli |

|                           |                           |
|---------------------------|---------------------------|
| Arifuzzaman et al. (2006) | 16606699 Escherichia coli |
| Arifuzzaman et al. (2006) | 16606699 Escherichia coli |
| Arifuzzaman et al. (2006) | 16606699 Escherichia coli |

|                           |                           |
|---------------------------|---------------------------|
| Arifuzzaman et al. (2006) | 16606699 Escherichia coli |
| Arifuzzaman et al. (2006) | 16606699 Escherichia coli |
| Arifuzzaman et al. (2006) | 16606699 Escherichia coli |



Lasserre et al. (2006)

16858726 Escherichia coli

Butland et al. (2005)

15690043 Escherichia coli

Butland et al. (2005)

15690043 Escherichia coli

Butland et al. (2005)

15690043 Escherichia coli

Arifuzzaman et al. (2006)

16606699 Escherichia coli

Butland et al. (2005)

15690043 Escherichia coli

Arifuzzaman et al. (2006)

16606699 Escherichia coli

Arifuzzaman et al. (2006)

16606699 Escherichia coli

Arifuzzaman et al. (2006)

16606699 Escherichia coli

Butland et al. (2005)

15690043 Escherichia coli

Arifuzzaman et al. (2006)

16606699 Escherichia coli

Butland et al. (2005)

15690043 Escherichia coli

Butland et al. (2005)

15690043 Escherichia coli

Butland et al. (2005)

15690043 Escherichia coli

Arifuzzaman et al. (2006)

16606699 Escherichia coli

Butland et al. (2005)

15690043 Escherichia coli

|                           |                           |
|---------------------------|---------------------------|
| Butland et al. (2005)     | 15690043 Escherichia coli |
| Butland et al. (2005)     | 15690043 Escherichia coli |
| Butland et al. (2005)     | 15690043 Escherichia coli |
| Butland et al. (2005)     | 15690043 Escherichia coli |
| Butland et al. (2005)     | 15690043 Escherichia coli |
| Butland et al. (2005)     | 15690043 Escherichia coli |
| Arifuzzaman et al. (2006) | 16606699 Escherichia coli |
| Butland et al. (2005)     | 15690043 Escherichia coli |
| Butland et al. (2005)     | 15690043 Escherichia coli |
| Butland et al. (2005)     | 15690043 Escherichia coli |
| Butland et al. (2005)     | 15690043 Escherichia coli |
| Butland et al. (2005)     | 15690043 Escherichia coli |
| Butland et al. (2005)     | 15690043 Escherichia coli |
| Butland et al. (2005)     | 15690043 Escherichia coli |
| Butland et al. (2005)     | 15690043 Escherichia coli |
| Arifuzzaman et al. (2006) | 16606699 Escherichia coli |
| Butland et al. (2005)     | 15690043 Escherichia coli |

|                           |                           |
|---------------------------|---------------------------|
| Arifuzzaman et al. (2006) | 16606699 Escherichia coli |
| Arifuzzaman et al. (2006) | 16606699 Escherichia coli |
| Arifuzzaman et al. (2006) | 16606699 Escherichia coli |
| Arifuzzaman et al. (2006) | 16606699 Escherichia coli |

|                           |                           |
|---------------------------|---------------------------|
| Arifuzzaman et al. (2006) | 16606699 Escherichia coli |
| Arifuzzaman et al. (2006) | 16606699 Escherichia coli |
| Arifuzzaman et al. (2006) | 16606699 Escherichia coli |
| Arifuzzaman et al. (2006) | 16606699 Escherichia coli |

|                       |                           |
|-----------------------|---------------------------|
| Butland et al. (2005) | 15690043 Escherichia coli |
|-----------------------|---------------------------|



|                           |                           |
|---------------------------|---------------------------|
| Butland et al. (2005)     | 15690043 Escherichia coli |
| Arifuzzaman et al. (2006) | 16606699 Escherichia coli |
| Arifuzzaman et al. (2006) | 16606699 Escherichia coli |

|                           |                           |
|---------------------------|---------------------------|
| Arifuzzaman et al. (2006) | 16606699 Escherichia coli |
|---------------------------|---------------------------|

|                           |                           |
|---------------------------|---------------------------|
| Arifuzzaman et al. (2006) | 16606699 Escherichia coli |
| Arifuzzaman et al. (2006) | 16606699 Escherichia coli |
| Arifuzzaman et al. (2006) | 16606699 Escherichia coli |
| Arifuzzaman et al. (2006) | 16606699 Escherichia coli |
| Arifuzzaman et al. (2006) | 16606699 Escherichia coli |
| Arifuzzaman et al. (2006) | 16606699 Escherichia coli |
| Arifuzzaman et al. (2006) | 16606699 Escherichia coli |

|                           |                           |
|---------------------------|---------------------------|
| Arifuzzaman et al. (2006) | 16606699 Escherichia coli |
| Arifuzzaman et al. (2006) | 16606699 Escherichia coli |

|                           |                           |
|---------------------------|---------------------------|
| Arifuzzaman et al. (2006) | 16606699 Escherichia coli |
| Arifuzzaman et al. (2006) | 16606699 Escherichia coli |

|                           |                           |
|---------------------------|---------------------------|
| Arifuzzaman et al. (2006) | 16606699 Escherichia coli |
| Arifuzzaman et al. (2006) | 16606699 Escherichia coli |

|                           |                           |
|---------------------------|---------------------------|
| Arifuzzaman et al. (2006) | 16606699 Escherichia coli |
|---------------------------|---------------------------|





|                       |                           |
|-----------------------|---------------------------|
| Butland et al. (2005) | 15690043 Escherichia coli |
| Butland et al. (2005) | 15690043 Escherichia coli |
| Butland et al. (2005) | 15690043 Escherichia coli |
| Butland et al. (2005) | 15690043 Escherichia coli |
| Butland et al. (2005) | 15690043 Escherichia coli |
| Butland et al. (2005) | 15690043 Escherichia coli |
| Butland et al. (2005) | 15690043 Escherichia coli |

|                           |                           |
|---------------------------|---------------------------|
| Arifuzzaman et al. (2006) | 16606699 Escherichia coli |
|---------------------------|---------------------------|

|                       |                           |
|-----------------------|---------------------------|
| Butland et al. (2005) | 15690043 Escherichia coli |
|-----------------------|---------------------------|

|                           |                           |
|---------------------------|---------------------------|
| Arifuzzaman et al. (2006) | 16606699 Escherichia coli |
|---------------------------|---------------------------|

|                          |                           |
|--------------------------|---------------------------|
| Rajagopala et al. (2009) | 19834901 Escherichia coli |
|--------------------------|---------------------------|

Arifuzzaman et al. (2006) 16606699 Escherichia coli  
Arifuzzaman et al. (2006) 16606699 Escherichia coli

Arifuzzaman et al. (2006) 16606699 Escherichia coli  
Arifuzzaman et al. (2006) 16606699 Escherichia coli

Arifuzzaman et al. (2006) 16606699 Escherichia coli  
Arifuzzaman et al. (2006) 16606699 Escherichia coli  
Arifuzzaman et al. (2006) 16606699 Escherichia coli  
Arifuzzaman et al. (2006) 16606699 Escherichia coli

Arifuzzaman et al. (2006) 16606699 Escherichia coli  
Arifuzzaman et al. (2006) 16606699 Escherichia coli

Arifuzzaman et al. (2006) 16606699 Escherichia coli

Arifuzzaman et al. (2006)  
Arifuzzaman et al. (2006)  
Arifuzzaman et al. (2006)

16606699 Escherichia coli  
16606699 Escherichia coli  
16606699 Escherichia coli

| Taxid interactor B | Interaction type     | Source database | Interaction identifier |
|--------------------|----------------------|-----------------|------------------------|
| Escherichia coli   | physical association | intact          | EBI-1141682            |
| Escherichia coli   | physical association | intact          | EBI-1771017            |
| Escherichia coli   | physical association | intact          | EBI-907071             |
| Escherichia coli   | association          | intact          | EBI-1137900            |
| Escherichia coli   | association          | intact          | EBI-1137900            |
| Escherichia coli   | association          | intact          | EBI-1137900            |
| Escherichia coli   | association          | intact          | EBI-1137900            |
| Escherichia coli   | association          | intact          | EBI-1137900            |
| Escherichia coli   | physical association | intact          | EBI-1138400            |
| Escherichia coli   | association          | intact          | EBI-882405             |
| Escherichia coli   | association          | intact          | EBI-889915             |
| Escherichia coli   | association          | intact          | EBI-1135857            |
| Escherichia coli   | association          | intact          | EBI-1135857            |
| Escherichia coli   | association          | intact          | EBI-889915             |
| Escherichia coli   | association          | intact          | EBI-1135857            |
| Escherichia coli   | association          | intact          | EBI-889915             |
| Escherichia coli   | association          | intact          | EBI-1135857            |
| Escherichia coli   | association          | intact          | EBI-889915             |
| Escherichia coli   | association          | intact          | EBI-889915             |
| Escherichia coli   | association          | intact          | EBI-889915             |
| Escherichia coli   | association          | intact          | EBI-882405             |
| Escherichia coli   | association          | intact          | EBI-889915             |
| Escherichia coli   | association          | intact          | EBI-890206             |
| Escherichia coli   | association          | intact          | EBI-890206             |
| Escherichia coli   | association          | intact          | EBI-882643             |
| Escherichia coli   | association          | intact          | EBI-890206             |
| Escherichia coli   | association          | intact          | EBI-1145313            |
| Escherichia coli   | association          | intact          | EBI-890206             |
| Escherichia coli   | association          | intact          | EBI-882643             |
| Escherichia coli   | association          | intact          | EBI-882643             |
| Escherichia coli   | association          | intact          | EBI-1145313            |
| Escherichia coli   | association          | intact          | EBI-1145313            |
| Escherichia coli   | association          | intact          | EBI-882643             |
| Escherichia coli   | association          | intact          | EBI-890206             |
| Escherichia coli   | association          | intact          | EBI-1145313            |
| Escherichia coli   | association          | intact          | EBI-1145313            |
| Escherichia coli   | association          | intact          | EBI-1145313            |
| Escherichia coli   | association          | intact          | EBI-1147289            |
| Escherichia coli   | association          | intact          | EBI-1147289            |

|                  |                      |        |             |
|------------------|----------------------|--------|-------------|
| Escherichia coli | association          | intact | EBI-1142466 |
| Escherichia coli | association          | intact | EBI-1142466 |
| Escherichia coli | association          | intact | EBI-1142466 |
| Escherichia coli | association          | intact | EBI-1142466 |
| Escherichia coli | association          | intact | EBI-1142466 |
| Escherichia coli | association          | intact | EBI-1142466 |
| Escherichia coli | association          | intact | EBI-1142466 |
| Escherichia coli | association          | intact | EBI-1142466 |
| Escherichia coli | association          | intact | EBI-1142466 |
| Escherichia coli | association          | intact | EBI-1142466 |
| Escherichia coli | association          | intact | EBI-1142466 |
| Escherichia coli | association          | intact | EBI-1142466 |
| Escherichia coli | physical association | intact | EBI-1139437 |
| Escherichia coli | association          | intact | EBI-1135623 |
| Escherichia coli | association          | intact | EBI-1135623 |
| Escherichia coli | association          | intact | EBI-1135623 |
| Escherichia coli | association          | intact | EBI-878935  |
| Escherichia coli | association          | intact | EBI-882138  |
| Escherichia coli | association          | intact | EBI-882138  |
| Escherichia coli | association          | intact | EBI-878935  |
| Escherichia coli | association          | intact | EBI-878935  |
| Escherichia coli | association          | intact | EBI-882138  |
| Escherichia coli | association          | intact | EBI-878935  |
| Escherichia coli | association          | intact | EBI-882138  |
| Escherichia coli | association          | intact | EBI-878935  |
| Escherichia coli | physical association | intact | EBI-861865  |
| Escherichia coli | association          | intact | EBI-852941  |
| Escherichia coli | association          | intact | EBI-878935  |
| Escherichia coli | association          | intact | EBI-882138  |
| Escherichia coli | association          | intact | EBI-852941  |
| Escherichia coli | association          | intact | EBI-878935  |
| Escherichia coli | association          | intact | EBI-882138  |
| Escherichia coli | association          | intact | EBI-878935  |
| Escherichia coli | association          | intact | EBI-878935  |
| Escherichia coli | association          | intact | EBI-878935  |
| Escherichia coli | association          | intact | EBI-878935  |
| Escherichia coli | association          | intact | EBI-882138  |
| Escherichia coli | association          | intact | EBI-878935  |
| Escherichia coli | association          | intact | EBI-878935  |





|                  |                      |        |             |
|------------------|----------------------|--------|-------------|
| Escherichia coli | association          | intact | EBI-1139291 |
| Escherichia coli | association          | intact | EBI-1139291 |
| Escherichia coli | association          | intact | EBI-1139291 |
| Escherichia coli | association          | intact | EBI-1139291 |
| Escherichia coli | association          | intact | EBI-1139291 |
| Escherichia coli | physical association | intact | EBI-891082  |
| Escherichia coli | association          | intact | EBI-1139291 |
|                  |                      |        |             |
| Escherichia coli | association          | intact | EBI-1138588 |
| Escherichia coli | association          | intact | EBI-1138588 |
| Escherichia coli | association          | intact | EBI-1138588 |
|                  |                      |        |             |
| Escherichia coli | association          | intact | EBI-1137372 |
| Escherichia coli | association          | intact | EBI-1137372 |
| Escherichia coli | physical association | intact | EBI-1770986 |
| Escherichia coli | physical association | intact | EBI-1770986 |
| Escherichia coli | association          | intact | EBI-1137372 |
| Escherichia coli | association          | intact | EBI-1137372 |
| Escherichia coli | association          | intact | EBI-1137372 |
|                  |                      |        |             |
| Escherichia coli | association          | intact | EBI-1137379 |
| Escherichia coli | association          | intact | EBI-1137379 |
| Escherichia coli | association          | intact | EBI-1137379 |
|                  |                      |        |             |
| Escherichia coli | association          | intact | EBI-888995  |
| Escherichia coli | association          | intact | EBI-881555  |
| Escherichia coli | association          | intact | EBI-888995  |
| Escherichia coli | association          | intact | EBI-881555  |
| Escherichia coli | association          | intact | EBI-881555  |
| Escherichia coli | association          | intact | EBI-888995  |
| Escherichia coli | association          | intact | EBI-881555  |
| Escherichia coli | association          | intact | EBI-888995  |
| Escherichia coli | association          | intact | EBI-888995  |
| Escherichia coli | association          | intact | EBI-888995  |
| Escherichia coli | association          | intact | EBI-888995  |
| Escherichia coli | association          | intact | EBI-888995  |
| Escherichia coli | association          | intact | EBI-888995  |
| Escherichia coli | association          | intact | EBI-881555  |
| Escherichia coli | association          | intact | EBI-888995  |
| Escherichia coli | association          | intact | EBI-888995  |
| Escherichia coli | association          | intact | EBI-888995  |

|                  |             |        |             |
|------------------|-------------|--------|-------------|
| Escherichia coli | association | intact | EBI-888995  |
| Escherichia coli | association | intact | EBI-888995  |
| Escherichia coli | association | intact | EBI-881555  |
| Escherichia coli | association | intact | EBI-888995  |
| Escherichia coli | association | intact | EBI-888995  |
| Escherichia coli | association | intact | EBI-888995  |
| Escherichia coli | association | intact | EBI-888995  |
| Escherichia coli | association | intact | EBI-888995  |
| Escherichia coli | association | intact | EBI-1135292 |
| Escherichia coli | association | intact | EBI-1135292 |

|                  |                      |        |            |
|------------------|----------------------|--------|------------|
| Escherichia coli | physical association | intact | EBI-884401 |
| Escherichia coli | association          | intact | EBI-879773 |
| Escherichia coli | association          | intact | EBI-879773 |
| Escherichia coli | association          | intact | EBI-879773 |
| Escherichia coli | association          | intact | EBI-879773 |
| Escherichia coli | association          | intact | EBI-879773 |

|                  |             |        |            |
|------------------|-------------|--------|------------|
| Escherichia coli | association | intact | EBI-894549 |
| Escherichia coli | association | intact | EBI-894549 |
| Escherichia coli | association | intact | EBI-889533 |
| Escherichia coli | association | intact | EBI-894549 |

|                  |             |        |             |
|------------------|-------------|--------|-------------|
| Escherichia coli | association | intact | EBI-1141014 |
| Escherichia coli | association | intact | EBI-1141014 |
| Escherichia coli | association | intact | EBI-1141014 |
| Escherichia coli | association | intact | EBI-1141014 |
| Escherichia coli | association | intact | EBI-1141014 |
| Escherichia coli | association | intact | EBI-1141014 |
| Escherichia coli | association | intact | EBI-1141014 |

|                  |             |        |             |
|------------------|-------------|--------|-------------|
| Escherichia coli | association | intact | EBI-1136995 |
| Escherichia coli | association | intact | EBI-1136995 |
| Escherichia coli | association | intact | EBI-1136995 |
| Escherichia coli | association | intact | EBI-1136995 |
| Escherichia coli | association | intact | EBI-1136995 |

|                  |             |        |             |
|------------------|-------------|--------|-------------|
| Escherichia coli | association | intact | EBI-889682  |
| Escherichia coli | association | intact | EBI-1136950 |
| Escherichia coli | association | intact | EBI-1136950 |
| Escherichia coli | association | intact | EBI-889682  |
| Escherichia coli | association | intact | EBI-889682  |



|                  |                      |        |             |
|------------------|----------------------|--------|-------------|
| Escherichia coli | association          | intact | EBI-886162  |
| Escherichia coli | association          | intact | EBI-886162  |
| Escherichia coli | association          | intact | EBI-886162  |
| Escherichia coli | association          | intact | EBI-886162  |
| Escherichia coli | association          | intact | EBI-886162  |
| Escherichia coli | association          | intact | EBI-886162  |
| Escherichia coli | association          | intact | EBI-886162  |
| Escherichia coli | association          | intact | EBI-886162  |
| Escherichia coli | association          | intact | EBI-886162  |
| Escherichia coli | association          | intact | EBI-886162  |
| Escherichia coli | association          | intact | EBI-886162  |
| Escherichia coli | association          | intact | EBI-886162  |
| Escherichia coli | association          | intact | EBI-887044  |
| Escherichia coli | association          | intact | EBI-887044  |
| Escherichia coli | association          | intact | EBI-1138417 |
| Escherichia coli | association          | intact | EBI-1138417 |
| Escherichia coli | association          | intact | EBI-1136779 |
| Escherichia coli | association          | intact | EBI-1136779 |
| Escherichia coli | association          | intact | EBI-1136779 |
| Escherichia coli | physical association | intact | EBI-1147992 |
| Escherichia coli | association          | intact | EBI-1145778 |
| Escherichia coli | association          | intact | EBI-1145778 |
| Escherichia coli | association          | intact | EBI-1145778 |
| Escherichia coli | association          | intact | EBI-1145345 |
| Escherichia coli | physical association | intact | EBI-892144  |
| Escherichia coli | association          | intact | EBI-1145345 |
| Escherichia coli | association          | intact | EBI-1136440 |
| Escherichia coli | association          | intact | EBI-1136440 |
| Escherichia coli | association          | intact | EBI-1136440 |

|                  |                      |        |             |
|------------------|----------------------|--------|-------------|
| Escherichia coli | physical association | intact | EBI-1146632 |
| Escherichia coli | physical association | intact | EBI-1146629 |
| Escherichia coli | association          | intact | EBI-1144449 |
| Escherichia coli | association          | intact | EBI-1144449 |
| Escherichia coli | physical association | intact | EBI-906660  |
| Escherichia coli | physical association | intact | EBI-878836  |
| Escherichia coli | physical association | intact | EBI-1212150 |
| Escherichia coli | physical association | intact | EBI-1212418 |
| Escherichia coli | physical association | intact | EBI-1213240 |
| Escherichia coli | physical association | intact | EBI-1213240 |
| Escherichia coli | physical association | intact | EBI-906660  |
| Escherichia coli | physical association | intact | EBI-1213240 |
| Escherichia coli | physical association | intact | EBI-1213240 |
| Escherichia coli | physical association | intact | EBI-1212150 |
| Escherichia coli | physical association | intact | EBI-1212418 |
| Escherichia coli | association          | intact | EBI-1146615 |
| Escherichia coli | association          | intact | EBI-1146615 |
| Escherichia coli | physical association | intact | EBI-1212150 |
| Escherichia coli | physical association | intact | EBI-1212418 |
| Escherichia coli | physical association | intact | EBI-1212150 |
| Escherichia coli | physical association | intact | EBI-1212150 |
| Escherichia coli | association          | intact | EBI-1146615 |
| Escherichia coli | physical association | intact | EBI-906600  |
| Escherichia coli | association          | intact | EBI-1146605 |
| Escherichia coli | association          | intact | EBI-1146605 |
| Escherichia coli | association          | intact | EBI-1146605 |
| Escherichia coli | association          | intact | EBI-1146605 |
| Escherichia coli | association          | intact | EBI-1146605 |
| Escherichia coli | association          | intact | EBI-1146605 |
| Escherichia coli | association          | intact | EBI-1146605 |
| Escherichia coli | association          | intact | EBI-1146605 |
| Escherichia coli | association          | intact | EBI-881946  |
| Escherichia coli | association          | intact | EBI-878843  |
| Escherichia coli | association          | intact | EBI-878843  |
| Escherichia coli | association          | intact | EBI-881946  |
| Escherichia coli | association          | intact | EBI-878843  |

|                  |             |        |             |
|------------------|-------------|--------|-------------|
| Escherichia coli | association | intact | EBI-881946  |
| Escherichia coli | association | intact | EBI-1145978 |
| Escherichia coli | association | intact | EBI-1145978 |
| Escherichia coli | association | intact | EBI-1145978 |
| Escherichia coli | association | intact | EBI-1145978 |
| Escherichia coli | association | intact | EBI-1145978 |
| Escherichia coli | association | intact | EBI-1145978 |
| Escherichia coli | association | intact | EBI-1145978 |
| Escherichia coli | association | intact | EBI-1147473 |
| Escherichia coli | association | intact | EBI-1147473 |
| Escherichia coli | association | intact | EBI-1147473 |
| Escherichia coli | association | intact | EBI-1147473 |
| Escherichia coli | association | intact | EBI-1143003 |
| Escherichia coli | association | intact | EBI-1143003 |
| Escherichia coli | association | intact | EBI-1143003 |
| Escherichia coli | association | intact | EBI-1143003 |
| Escherichia coli | association | intact | EBI-1143003 |
| Escherichia coli | association | intact | EBI-1143003 |
| Escherichia coli | association | intact | EBI-1143003 |
| Escherichia coli | association | intact | EBI-1136177 |
| Escherichia coli | association | intact | EBI-1136177 |
| Escherichia coli | association | intact | EBI-1136177 |
| Escherichia coli | association | intact | EBI-1136177 |
| Escherichia coli | association | intact | EBI-1136177 |
| Escherichia coli | association | intact | EBI-1136177 |
| Escherichia coli | association | intact | EBI-1145589 |
| Escherichia coli | association | intact | EBI-1145589 |
| Escherichia coli | association | intact | EBI-1144239 |
| Escherichia coli | association | intact | EBI-1144239 |





|                  |             |        |             |
|------------------|-------------|--------|-------------|
| Escherichia coli | association | intact | EBI-1140631 |
| Escherichia coli | association | intact | EBI-885677  |
| Escherichia coli | association | intact | EBI-1138573 |
| Escherichia coli | association | intact | EBI-885677  |
| Escherichia coli | association | intact | EBI-885677  |
| Escherichia coli | association | intact | EBI-885677  |
| Escherichia coli | association | intact | EBI-892312  |
| Escherichia coli | association | intact | EBI-885677  |
| Escherichia coli | association | intact | EBI-1138573 |
| Escherichia coli | association | intact | EBI-885677  |
| Escherichia coli | association | intact | EBI-885677  |
| Escherichia coli | association | intact | EBI-885677  |
| Escherichia coli | association | intact | EBI-885677  |
| Escherichia coli | association | intact | EBI-1138573 |
| Escherichia coli | association | intact | EBI-885677  |
| Escherichia coli | association | intact | EBI-885677  |
| Escherichia coli | association | intact | EBI-1138573 |
| Escherichia coli | association | intact | EBI-885677  |
| Escherichia coli | association | intact | EBI-885677  |
| Escherichia coli | association | intact | EBI-885677  |
| Escherichia coli | association | intact | EBI-885677  |
| Escherichia coli | association | intact | EBI-892312  |
| Escherichia coli | association | intact | EBI-885677  |
| Escherichia coli | association | intact | EBI-892312  |
| Escherichia coli | association | intact | EBI-885677  |
| Escherichia coli | association | intact | EBI-1138573 |
| Escherichia coli | association | intact | EBI-885677  |
| Escherichia coli | association | intact | EBI-885677  |
| Escherichia coli | association | intact | EBI-892312  |
| Escherichia coli | association | intact | EBI-885677  |
| Escherichia coli | association | intact | EBI-885677  |
| Escherichia coli | association | intact | EBI-885677  |
| Escherichia coli | association | intact | EBI-892312  |
| Escherichia coli | association | intact | EBI-892312  |
| Escherichia coli | association | intact | EBI-885677  |
| Escherichia coli | association | intact | EBI-885677  |
| Escherichia coli | association | intact | EBI-885677  |

|                  |             |        |             |
|------------------|-------------|--------|-------------|
| Escherichia coli | association | intact | EBI-892312  |
| Escherichia coli | association | intact | EBI-885677  |
| Escherichia coli | association | intact | EBI-885677  |
| Escherichia coli | association | intact | EBI-892312  |
| Escherichia coli | association | intact | EBI-892312  |
| Escherichia coli | association | intact | EBI-892312  |
| Escherichia coli | association | intact | EBI-885677  |
| Escherichia coli | association | intact | EBI-1138573 |
| Escherichia coli | association | intact | EBI-892312  |

|                  |             |        |             |
|------------------|-------------|--------|-------------|
| Escherichia coli | association | intact | EBI-1147019 |
| Escherichia coli | association | intact | EBI-1147019 |

|                  |                    |        |             |
|------------------|--------------------|--------|-------------|
| Escherichia coli | direct interaction | intact | EBI-1040059 |
|------------------|--------------------|--------|-------------|

|                  |                      |        |             |
|------------------|----------------------|--------|-------------|
| Escherichia coli | physical association | intact | EBI-1140406 |
|------------------|----------------------|--------|-------------|

|                  |                      |        |             |
|------------------|----------------------|--------|-------------|
| Escherichia coli | association          | intact | EBI-885556  |
| Escherichia coli | association          | intact | EBI-892166  |
| Escherichia coli | association          | intact | EBI-885556  |
| Escherichia coli | association          | intact | EBI-892166  |
| Escherichia coli | direct interaction   | intact | EBI-976272  |
| Escherichia coli | association          | intact | EBI-885556  |
| Escherichia coli | association          | intact | EBI-892166  |
| Escherichia coli | association          | intact | EBI-885556  |
| Escherichia coli | physical association | intact | EBI-1774611 |
| Escherichia coli | physical association | intact | EBI-1774969 |
| Escherichia coli | association          | intact | EBI-1147540 |
| Escherichia coli | association          | intact | EBI-885556  |
| Escherichia coli | association          | intact | EBI-1147540 |
| Escherichia coli | association          | intact | EBI-1147540 |
| Escherichia coli | association          | intact | EBI-892166  |
| Escherichia coli | association          | intact | EBI-1147540 |
| Escherichia coli | association          | intact | EBI-885556  |

|                  |                      |        |             |
|------------------|----------------------|--------|-------------|
| Escherichia coli | association          | intact | EBI-892166  |
| Escherichia coli | association          | intact | EBI-892166  |
| Escherichia coli | association          | intact | EBI-885524  |
| Escherichia coli | association          | intact | EBI-892151  |
| Escherichia coli | physical association | intact | EBI-2011448 |
| Escherichia coli | direct interaction   | intact | EBI-976257  |
| Escherichia coli | association          | intact | EBI-892151  |
| Escherichia coli | association          | intact | EBI-885524  |
| Escherichia coli | direct interaction   | intact | EBI-1774824 |
| Escherichia coli | direct interaction   | intact | EBI-1775032 |
| Escherichia coli | direct interaction   | intact | EBI-1774645 |
| Escherichia coli | direct interaction   | intact | EBI-976140  |
| Escherichia coli | association          | intact | EBI-885524  |
| Escherichia coli | association          | intact | EBI-1147548 |
| Escherichia coli | association          | intact | EBI-892151  |
| Escherichia coli | association          | intact | EBI-1147548 |
| Escherichia coli | physical association | intact | EBI-1771031 |
| Escherichia coli | physical association | intact | EBI-1139262 |
| Escherichia coli | physical association | intact | EBI-1771031 |
| Escherichia coli | physical association | intact | EBI-2011448 |
| Escherichia coli | association          | intact | EBI-885524  |
| Escherichia coli | association          | intact | EBI-892151  |
| Escherichia coli | association          | intact | EBI-892151  |
| Escherichia coli | association          | intact | EBI-885524  |
| Escherichia coli | physical association | intact | EBI-1147597 |
| Escherichia coli | association          | intact | EBI-1137791 |
| Escherichia coli | physical association | intact | EBI-1771006 |
| Escherichia coli | association          | intact | EBI-1137791 |
| Escherichia coli | association          | intact | EBI-1137791 |
| Escherichia coli | association          | intact | EBI-1137443 |
| Escherichia coli | association          | intact | EBI-1137443 |
| Escherichia coli | association          | intact | EBI-1137443 |
| Escherichia coli | association          | intact | EBI-1137443 |
| Escherichia coli | association          | intact | EBI-1137443 |
| Escherichia coli | association          | intact | EBI-891593  |
| Escherichia coli | association          | intact | EBI-1138254 |
| Escherichia coli | association          | intact | EBI-891593  |
| Escherichia coli | direct interaction   | intact | EBI-1034828 |
| Escherichia coli | direct interaction   | intact | EBI-1034227 |





|                  |             |        |             |
|------------------|-------------|--------|-------------|
| Escherichia coli | association | intact | EBI-1141122 |
| Escherichia coli | association | intact | EBI-1141122 |
| Escherichia coli | association | intact | EBI-1141122 |

|                  |                      |        |            |
|------------------|----------------------|--------|------------|
| Escherichia coli | association          | intact | EBI-885165 |
| Escherichia coli | physical association | intact | EBI-891949 |
| Escherichia coli | association          | intact | EBI-885165 |
| Escherichia coli | association          | intact | EBI-885165 |

|                  |                      |        |             |
|------------------|----------------------|--------|-------------|
| Escherichia coli | association          | intact | EBI-879643  |
| Escherichia coli | association          | intact | EBI-883980  |
| Escherichia coli | association          | intact | EBI-883980  |
| Escherichia coli | association          | intact | EBI-879643  |
| Escherichia coli | association          | intact | EBI-883980  |
| Escherichia coli | association          | intact | EBI-1140933 |
| Escherichia coli | association          | intact | EBI-883980  |
| Escherichia coli | association          | intact | EBI-883980  |
| Escherichia coli | association          | intact | EBI-883980  |
| Escherichia coli | physical association | intact | EBI-906966  |
| Escherichia coli | association          | intact | EBI-883980  |
| Escherichia coli | association          | intact | EBI-883980  |
| Escherichia coli | association          | intact | EBI-879643  |
| Escherichia coli | association          | intact | EBI-883980  |
| Escherichia coli | association          | intact | EBI-883980  |
| Escherichia coli | association          | intact | EBI-883980  |
| Escherichia coli | association          | intact | EBI-883980  |
| Escherichia coli | association          | intact | EBI-883980  |
| Escherichia coli | association          | intact | EBI-883980  |
| Escherichia coli | physical association | intact | EBI-906966  |
| Escherichia coli | association          | intact | EBI-879643  |
| Escherichia coli | association          | intact | EBI-883980  |
| Escherichia coli | association          | intact | EBI-1140933 |
| Escherichia coli | association          | intact | EBI-879643  |
| Escherichia coli | association          | intact | EBI-883980  |
| Escherichia coli | association          | intact | EBI-883980  |
| Escherichia coli | association          | intact | EBI-883980  |







|                  |                      |        |             |
|------------------|----------------------|--------|-------------|
| Escherichia coli | association          | intact | EBI-879539  |
| Escherichia coli | association          | intact | EBI-883767  |
| Escherichia coli | association          | intact | EBI-879539  |
| Escherichia coli | association          | intact | EBI-883767  |
| Escherichia coli | association          | intact | EBI-883767  |
| Escherichia coli | association          | intact | EBI-883767  |
| Escherichia coli | association          | intact | EBI-879539  |
| Escherichia coli | association          | intact | EBI-879539  |
| Escherichia coli | association          | intact | EBI-883767  |
| Escherichia coli | association          | intact | EBI-879539  |
| Escherichia coli | association          | intact | EBI-883767  |
| Escherichia coli | association          | intact | EBI-879539  |
| Escherichia coli | association          | intact | EBI-883767  |
| Escherichia coli | association          | intact | EBI-883767  |
| Escherichia coli | association          | intact | EBI-879539  |
| Escherichia coli | association          | intact | EBI-883767  |
| Escherichia coli | association          | intact | EBI-883767  |
| Escherichia coli | association          | intact | EBI-879539  |
| Escherichia coli | association          | intact | EBI-883767  |
| Escherichia coli | association          | intact | EBI-883767  |
| Escherichia coli | physical association | intact | EBI-1213228 |
| Escherichia coli | physical association | intact | EBI-1213228 |
| Escherichia coli | association          | intact | EBI-1136296 |
| Escherichia coli | association          | intact | EBI-1136296 |
| Escherichia coli | association          | intact | EBI-1136296 |
| Escherichia coli | association          | intact | EBI-1139431 |
| Escherichia coli | association          | intact | EBI-1139431 |
| Escherichia coli | association          | intact | EBI-1139431 |
| Escherichia coli | association          | intact | EBI-1139431 |
| Escherichia coli | physical association | intact | EBI-1145699 |
| Escherichia coli | physical association | intact | EBI-1143874 |
| Escherichia coli | physical association | intact | EBI-1143882 |
| Escherichia coli | association          | intact | EBI-1142744 |
| Escherichia coli | association          | intact | EBI-1142744 |
| Escherichia coli | association          | intact | EBI-1142744 |
| Escherichia coli | association          | intact | EBI-1142744 |
| Escherichia coli | association          | intact | EBI-1142744 |
| Escherichia coli | physical association | intact | EBI-1771057 |
| Escherichia coli | physical association | intact | EBI-1771057 |

|                  |                      |        |             |
|------------------|----------------------|--------|-------------|
| Escherichia coli | association          | intact | EBI-1142744 |
| Escherichia coli | physical association | intact | EBI-1142780 |
| Escherichia coli | association          | intact | EBI-1142999 |
| Escherichia coli | association          | intact | EBI-1142999 |
| Escherichia coli | physical association | intact | EBI-906996  |
| Escherichia coli | physical association | intact | EBI-1142975 |
| Escherichia coli | association          | intact | EBI-1147250 |
| Escherichia coli | physical association | intact | EBI-893204  |
| Escherichia coli | association          | intact | EBI-886936  |
| Escherichia coli | association          | intact | EBI-1147250 |
| Escherichia coli | association          | intact | EBI-886936  |
| Escherichia coli | association          | intact | EBI-1147250 |
| Escherichia coli | association          | intact | EBI-1147250 |
| Escherichia coli | association          | intact | EBI-1147250 |
| Escherichia coli | association          | intact | EBI-886936  |
| Escherichia coli | association          | intact | EBI-1147250 |
| Escherichia coli | association          | intact | EBI-1147250 |
| Escherichia coli | association          | intact | EBI-886936  |
| Escherichia coli | association          | intact | EBI-886936  |
| Escherichia coli | association          | intact | EBI-1147250 |
| Escherichia coli | association          | intact | EBI-1147250 |
| Escherichia coli | association          | intact | EBI-1147250 |
| Escherichia coli | association          | intact | EBI-884415  |
| Escherichia coli | association          | intact | EBI-1136666 |
| Escherichia coli | association          | intact | EBI-1136666 |
| Escherichia coli | association          | intact | EBI-884415  |



|                  |                      |        |             |
|------------------|----------------------|--------|-------------|
| Escherichia coli | association          | intact | EBI-1146061 |
| Escherichia coli | association          | intact | EBI-893820  |
| Escherichia coli | association          | intact | EBI-888455  |
| Escherichia coli | association          | intact | EBI-1146061 |
| Escherichia coli | physical association | intact | EBI-1212221 |
| Escherichia coli | physical association | intact | EBI-1212144 |
| Escherichia coli | physical association | intact | EBI-1212221 |
| Escherichia coli | physical association | intact | EBI-1212144 |
| Escherichia coli | physical association | intact | EBI-1212221 |
| Escherichia coli | association          | intact | EBI-893820  |
| Escherichia coli | association          | intact | EBI-1146061 |
| Escherichia coli | physical association | intact | EBI-1212221 |
|                  |                      |        |             |
| Escherichia coli | association          | intact | EBI-1139975 |
| Escherichia coli | association          | intact | EBI-887830  |
| Escherichia coli | association          | intact | EBI-1139975 |
| Escherichia coli | association          | intact | EBI-887830  |
| Escherichia coli | physical association | intact | EBI-893831  |
|                  |                      |        |             |
| Escherichia coli | association          | intact | EBI-1141506 |
| Escherichia coli | association          | intact | EBI-1141506 |
| Escherichia coli | association          | intact | EBI-1141506 |
| Escherichia coli | association          | intact | EBI-894157  |
| Escherichia coli | association          | intact | EBI-1141506 |
| Escherichia coli | association          | intact | EBI-1141506 |
| Escherichia coli | association          | intact | EBI-894157  |
| Escherichia coli | association          | intact | EBI-894157  |
| Escherichia coli | association          | intact | EBI-1141506 |
| Escherichia coli | association          | intact | EBI-894157  |
| Escherichia coli | association          | intact | EBI-894157  |
| Escherichia coli | association          | intact | EBI-894157  |
| Escherichia coli | association          | intact | EBI-894157  |
| Escherichia coli | association          | intact | EBI-894157  |
| Escherichia coli | association          | intact | EBI-894157  |
| Escherichia coli | association          | intact | EBI-894157  |
| Escherichia coli | association          | intact | EBI-894157  |
| Escherichia coli | association          | intact | EBI-1141506 |
|                  |                      |        |             |
| Escherichia coli | association          | intact | EBI-1140079 |
| Escherichia coli | association          | intact | EBI-1140079 |
| Escherichia coli | association          | intact | EBI-1140079 |
|                  |                      |        |             |
| Escherichia coli | physical association | intact | EBI-1147500 |





|                  |                      |        |             |
|------------------|----------------------|--------|-------------|
| Escherichia coli | association          | intact | EBI-881486  |
| Escherichia coli | association          | intact | EBI-888958  |
| Escherichia coli | association          | intact | EBI-881486  |
| Escherichia coli | association          | intact | EBI-881486  |
| Escherichia coli | physical association | intact | EBI-880244  |
| Escherichia coli | physical association | intact | EBI-883708  |
| Escherichia coli | physical association | intact | EBI-1145366 |
| Escherichia coli | physical association | intact | EBI-1135751 |
| Escherichia coli | association          | intact | EBI-1147952 |
| Escherichia coli | association          | intact | EBI-1147952 |
| Escherichia coli | association          | intact | EBI-1147952 |
| Escherichia coli | association          | intact | EBI-1147952 |
| Escherichia coli | association          | intact | EBI-1147944 |
| Escherichia coli | association          | intact | EBI-1147944 |
| Escherichia coli | association          | intact | EBI-1147944 |
| Escherichia coli | physical association | intact | EBI-1147958 |
| Escherichia coli | physical association | intact | EBI-889953  |
| Escherichia coli | physical association | intact | EBI-894868  |
| Escherichia coli | physical association | intact | EBI-1145894 |
| Escherichia coli | association          | intact | EBI-1138895 |
| Escherichia coli | association          | intact | EBI-1138895 |
| Escherichia coli | association          | intact | EBI-1138895 |
| Escherichia coli | association          | intact | EBI-1138895 |
| Escherichia coli | association          | intact | EBI-1138895 |
| Escherichia coli | association          | intact | EBI-1138895 |
| Escherichia coli | physical association | intact | EBI-1035546 |
| Escherichia coli | physical association | intact | EBI-1035563 |
| Escherichia coli | physical association | intact | EBI-1213174 |
| Escherichia coli | physical association | intact | EBI-1035546 |
| Escherichia coli | physical association | intact | EBI-1035563 |





|                  |             |        |             |
|------------------|-------------|--------|-------------|
| Escherichia coli | association | intact | EBI-887858  |
| Escherichia coli | association | intact | EBI-1145744 |
| Escherichia coli | association | intact | EBI-1145744 |
| Escherichia coli | association | intact | EBI-1145744 |
| Escherichia coli | association | intact | EBI-881035  |

|                  |                      |        |             |
|------------------|----------------------|--------|-------------|
| Escherichia coli | association          | intact | EBI-883621  |
| Escherichia coli | association          | intact | EBI-883621  |
| Escherichia coli | association          | intact | EBI-883621  |
| Escherichia coli | association          | intact | EBI-883621  |
| Escherichia coli | association          | intact | EBI-883621  |
| Escherichia coli | physical association | intact | EBI-1774733 |
| Escherichia coli | physical association | intact | EBI-2115441 |
| Escherichia coli | physical association | intact | EBI-2116071 |
| Escherichia coli | physical association | intact | EBI-2271845 |
| Escherichia coli | association          | intact | EBI-883621  |
| Escherichia coli | association          | intact | EBI-883621  |
| Escherichia coli | association          | intact | EBI-883621  |
| Escherichia coli | association          | intact | EBI-883621  |
| Escherichia coli | physical association | intact | EBI-1774733 |
| Escherichia coli | association          | intact | EBI-883621  |
| Escherichia coli | association          | intact | EBI-883621  |
| Escherichia coli | association          | intact | EBI-1135319 |
| Escherichia coli | association          | intact | EBI-883621  |
| Escherichia coli | association          | intact | EBI-883621  |
| Escherichia coli | association          | intact | EBI-883621  |
| Escherichia coli | association          | intact | EBI-883621  |
| Escherichia coli | association          | intact | EBI-883621  |
| Escherichia coli | association          | intact | EBI-883621  |
| Escherichia coli | association          | intact | EBI-883621  |
| Escherichia coli | association          | intact | EBI-883621  |
| Escherichia coli | association          | intact | EBI-883621  |
| Escherichia coli | association          | intact | EBI-883621  |
| Escherichia coli | association          | intact | EBI-883621  |
| Escherichia coli | association          | intact | EBI-890903  |
| Escherichia coli | association          | intact | EBI-890903  |
| Escherichia coli | association          | intact | EBI-883621  |
| Escherichia coli | association          | intact | EBI-890903  |
| Escherichia coli | association          | intact | EBI-883621  |
| Escherichia coli | association          | intact | EBI-883621  |



|                  |                      |        |             |
|------------------|----------------------|--------|-------------|
| Escherichia coli | association          | intact | EBI-1139971 |
| Escherichia coli | association          | intact | EBI-1139971 |
| Escherichia coli | direct interaction   | intact | EBI-1031818 |
| Escherichia coli | direct interaction   | intact | EBI-1031829 |
| Escherichia coli | association          | intact | EBI-885194  |
| Escherichia coli | association          | intact | EBI-891956  |
| Escherichia coli | association          | intact | EBI-885194  |
| Escherichia coli | association          | intact | EBI-891956  |
| Escherichia coli | association          | intact | EBI-885194  |
| Escherichia coli | association          | intact | EBI-885194  |
| Escherichia coli | association          | intact | EBI-885194  |
| Escherichia coli | association          | intact | EBI-891956  |
| Escherichia coli | association          | intact | EBI-891956  |
| Escherichia coli | association          | intact | EBI-891956  |
| Escherichia coli | association          | intact | EBI-891956  |
| Escherichia coli | association          | intact | EBI-891956  |
| Escherichia coli | association          | intact | EBI-891956  |
| Escherichia coli | association          | intact | EBI-891956  |
| Escherichia coli | physical association | intact | EBI-1138083 |
| Escherichia coli | association          | intact | EBI-891956  |
| Escherichia coli | association          | intact | EBI-880291  |
| Escherichia coli | association          | intact | EBI-1136539 |
| Escherichia coli | association          | intact | EBI-1136539 |
| Escherichia coli | association          | intact | EBI-880291  |
| Escherichia coli | association          | intact | EBI-1136539 |
| Escherichia coli | association          | intact | EBI-880291  |
| Escherichia coli | association          | intact | EBI-1136539 |
| Escherichia coli | association          | intact | EBI-1136539 |
| Escherichia coli | association          | intact | EBI-880291  |
| Escherichia coli | association          | intact | EBI-880291  |
| Escherichia coli | association          | intact | EBI-880291  |
| Escherichia coli | association          | intact | EBI-880291  |
| Escherichia coli | association          | intact | EBI-880291  |
| Escherichia coli | association          | intact | EBI-1136539 |
| Escherichia coli | association          | intact | EBI-880291  |
| Escherichia coli | association          | intact | EBI-880291  |

|                  |                      |        |             |
|------------------|----------------------|--------|-------------|
| Escherichia coli | physical association | intact | EBI-1029868 |
| Escherichia coli | association          | intact | EBI-887996  |
| Escherichia coli | association          | intact | EBI-887996  |
| Escherichia coli | association          | intact | EBI-893622  |
| Escherichia coli | physical association | intact | EBI-906856  |
| Escherichia coli | physical association | intact | EBI-1770950 |
| Escherichia coli | physical association | intact | EBI-906856  |
| Escherichia coli | association          | intact | EBI-887996  |
| Escherichia coli | physical association | intact | EBI-1770950 |
| Escherichia coli | association          | intact | EBI-893622  |
| Escherichia coli | association          | intact | EBI-887996  |
| Escherichia coli | association          | intact | EBI-1145597 |
| Escherichia coli | association          | intact | EBI-1145597 |
| Escherichia coli | association          | intact | EBI-893622  |
| Escherichia coli | association          | intact | EBI-1145597 |
| Escherichia coli | association          | intact | EBI-893622  |
| Escherichia coli | association          | intact | EBI-1145597 |
| Escherichia coli | association          | intact | EBI-893622  |
| Escherichia coli | association          | intact | EBI-893622  |
| Escherichia coli | association          | intact | EBI-893622  |
| Escherichia coli | association          | intact | EBI-887539  |
| Escherichia coli | physical association | intact | EBI-1135775 |
| Escherichia coli | association          | intact | EBI-887539  |
| Escherichia coli | direct interaction   | intact | EBI-301213  |
| Escherichia coli | physical association | intact | EBI-906617  |
| Escherichia coli | association          | intact | EBI-887539  |
| Escherichia coli | physical association | intact | EBI-880968  |
| Escherichia coli | association          | intact | EBI-887539  |
| Escherichia coli | association          | intact | EBI-887539  |
| Escherichia coli | association          | intact | EBI-894882  |
| Escherichia coli | association          | intact | EBI-894882  |
| Escherichia coli | association          | intact | EBI-894882  |
| Escherichia coli | association          | intact | EBI-894882  |
| Escherichia coli | association          | intact | EBI-889981  |
| Escherichia coli | association          | intact | EBI-1145593 |
| Escherichia coli | association          | intact | EBI-1145593 |
| Escherichia coli | association          | intact | EBI-894882  |

|                  |             |        |            |
|------------------|-------------|--------|------------|
| Escherichia coli | association | intact | EBI-889981 |
| Escherichia coli | association | intact | EBI-889981 |
| Escherichia coli | association | intact | EBI-894882 |
| Escherichia coli | association | intact | EBI-889981 |
| Escherichia coli | association | intact | EBI-894882 |
| Escherichia coli | association | intact | EBI-894882 |
| Escherichia coli | association | intact | EBI-894882 |
| Escherichia coli | association | intact | EBI-894882 |
| Escherichia coli | association | intact | EBI-894882 |
| Escherichia coli | association | intact | EBI-894882 |

|                  |             |        |             |
|------------------|-------------|--------|-------------|
| Escherichia coli | association | intact | EBI-1142392 |
| Escherichia coli | association | intact | EBI-1142392 |
| Escherichia coli | association | intact | EBI-1142392 |
| Escherichia coli | association | intact | EBI-1142392 |
| Escherichia coli | association | intact | EBI-1142392 |

|                  |             |        |             |
|------------------|-------------|--------|-------------|
| Escherichia coli | association | intact | EBI-1139166 |
| Escherichia coli | association | intact | EBI-1139166 |
| Escherichia coli | association | intact | EBI-1139166 |
| Escherichia coli | association | intact | EBI-1139166 |
| Escherichia coli | association | intact | EBI-1139166 |
| Escherichia coli | association | intact | EBI-1139166 |

|                  |                      |        |             |
|------------------|----------------------|--------|-------------|
| Escherichia coli | association          | intact | EBI-1143906 |
| Escherichia coli | association          | intact | EBI-880413  |
| Escherichia coli | association          | intact | EBI-885840  |
| Escherichia coli | association          | intact | EBI-880413  |
| Escherichia coli | physical association | intact | EBI-1770991 |
| Escherichia coli | association          | intact | EBI-1143906 |
| Escherichia coli | association          | intact | EBI-1143906 |
| Escherichia coli | association          | intact | EBI-885840  |
| Escherichia coli | association          | intact | EBI-880413  |
| Escherichia coli | association          | intact | EBI-885840  |
| Escherichia coli | association          | intact | EBI-1143906 |
| Escherichia coli | association          | intact | EBI-1143906 |
| Escherichia coli | association          | intact | EBI-1143906 |
| Escherichia coli | association          | intact | EBI-1143906 |
| Escherichia coli | association          | intact | EBI-880413  |

|                  |                      |        |             |
|------------------|----------------------|--------|-------------|
| Escherichia coli | association          | intact | EBI-885840  |
| Escherichia coli | physical association | intact | EBI-1169650 |
| Escherichia coli | physical association | intact | EBI-1169664 |
| Escherichia coli | association          | intact | EBI-885840  |
| Escherichia coli | association          | intact | EBI-880413  |
| Escherichia coli | association          | intact | EBI-1143906 |
| Escherichia coli | association          | intact | EBI-1143906 |
| Escherichia coli | association          | intact | EBI-880413  |
| Escherichia coli | association          | intact | EBI-1143906 |
| Escherichia coli | physical association | intact | EBI-1145339 |
| Escherichia coli | association          | intact | EBI-1142885 |
| Escherichia coli | association          | intact | EBI-1142885 |
| Escherichia coli | association          | intact | EBI-1142885 |
| Escherichia coli | association          | intact | EBI-1142885 |
| Escherichia coli | association          | intact | EBI-1142885 |
| Escherichia coli | association          | intact | EBI-1142885 |
| Escherichia coli | association          | intact | EBI-887293  |
| Escherichia coli | association          | intact | EBI-1138471 |
| Escherichia coli | association          | intact | EBI-893249  |
| Escherichia coli | association          | intact | EBI-887293  |
| Escherichia coli | association          | intact | EBI-887293  |
| Escherichia coli | association          | intact | EBI-887293  |
| Escherichia coli | association          | intact | EBI-887293  |
| Escherichia coli | association          | intact | EBI-1138471 |
| Escherichia coli | association          | intact | EBI-887293  |
| Escherichia coli | association          | intact | EBI-887293  |
| Escherichia coli | association          | intact | EBI-887293  |
| Escherichia coli | association          | intact | EBI-1138471 |
| Escherichia coli | association          | intact | EBI-887293  |
| Escherichia coli | association          | intact | EBI-887293  |
| Escherichia coli | association          | intact | EBI-887293  |
| Escherichia coli | association          | intact | EBI-887293  |
| Escherichia coli | association          | intact | EBI-887293  |
| Escherichia coli | association          | intact | EBI-1138471 |
| Escherichia coli | association          | intact | EBI-887293  |
| Escherichia coli | association          | intact | EBI-887293  |
| Escherichia coli | association          | intact | EBI-1138471 |

|                  |                      |        |             |
|------------------|----------------------|--------|-------------|
| Escherichia coli | association          | intact | EBI-1138471 |
| Escherichia coli | association          | intact | EBI-1138471 |
| Escherichia coli | association          | intact | EBI-1142565 |
| Escherichia coli | association          | intact | EBI-1142565 |
| Escherichia coli | association          | intact | EBI-1142565 |
| Escherichia coli | association          | intact | EBI-1142565 |
| Escherichia coli | association          | intact | EBI-1142565 |
| Escherichia coli | association          | intact | EBI-1142565 |
| Escherichia coli | association          | intact | EBI-1138831 |
| Escherichia coli | association          | intact | EBI-1138831 |
| Escherichia coli | association          | intact | EBI-893240  |
| Escherichia coli | association          | intact | EBI-1138841 |
| Escherichia coli | association          | intact | EBI-893240  |
| Escherichia coli | physical association | intact | EBI-887268  |
| Escherichia coli | association          | intact | EBI-1138841 |
| Escherichia coli | association          | intact | EBI-1138835 |
| Escherichia coli | association          | intact | EBI-1138835 |
| Escherichia coli | association          | intact | EBI-1138835 |
| Escherichia coli | association          | intact | EBI-1138835 |
| Escherichia coli | association          | intact | EBI-1138826 |
| Escherichia coli | association          | intact | EBI-1138826 |
| Escherichia coli | association          | intact | EBI-1138826 |
| Escherichia coli | association          | intact | EBI-887392  |
| Escherichia coli | association          | intact | EBI-887392  |
| Escherichia coli | association          | intact | EBI-887392  |
| Escherichia coli | association          | intact | EBI-887392  |
| Escherichia coli | association          | intact | EBI-887392  |
| Escherichia coli | association          | intact | EBI-887392  |
| Escherichia coli | association          | intact | EBI-887392  |
| Escherichia coli | physical association | intact | EBI-893265  |
| Escherichia coli | association          | intact | EBI-887148  |
| Escherichia coli | association          | intact | EBI-887148  |
| Escherichia coli | association          | intact | EBI-1135815 |
| Escherichia coli | association          | intact | EBI-887148  |
| Escherichia coli | association          | intact | EBI-887148  |





|                  |             |        |             |
|------------------|-------------|--------|-------------|
| Escherichia coli | association | intact | EBI-879752  |
| Escherichia coli | association | intact | EBI-884342  |
| Escherichia coli | association | intact | EBI-879752  |
| Escherichia coli | association | intact | EBI-879752  |
| Escherichia coli | association | intact | EBI-1139936 |

|                  |                      |        |             |
|------------------|----------------------|--------|-------------|
| Escherichia coli | association          | intact | EBI-1146913 |
| Escherichia coli | association          | intact | EBI-1146913 |
| Escherichia coli | physical association | intact | EBI-906693  |
| Escherichia coli | association          | intact | EBI-1146913 |
| Escherichia coli | association          | intact | EBI-1146913 |

|                  |             |        |             |
|------------------|-------------|--------|-------------|
| Escherichia coli | association | intact | EBI-1143120 |
| Escherichia coli | association | intact | EBI-1143120 |
| Escherichia coli | association | intact | EBI-1143120 |
| Escherichia coli | association | intact | EBI-1143120 |
| Escherichia coli | association | intact | EBI-1143120 |
| Escherichia coli | association | intact | EBI-1143120 |
| Escherichia coli | association | intact | EBI-1143120 |
| Escherichia coli | association | intact | EBI-1143120 |

|                  |                      |        |             |
|------------------|----------------------|--------|-------------|
| Escherichia coli | physical association | intact | EBI-2370618 |
| Escherichia coli | physical association | intact | EBI-2370522 |

|                  |                      |        |             |
|------------------|----------------------|--------|-------------|
| Escherichia coli | association          | intact | EBI-1785808 |
| Escherichia coli | association          | intact | EBI-1785808 |
| Escherichia coli | physical association | intact | EBI-1785905 |
| Escherichia coli | physical association | intact | EBI-2679321 |
| Escherichia coli | association          | intact | EBI-1785808 |
| Escherichia coli | physical association | intact | EBI-1785905 |
| Escherichia coli | physical association | intact | EBI-2679321 |
| Escherichia coli | direct interaction   | intact | EBI-1033486 |
| Escherichia coli | direct interaction   | intact | EBI-1033496 |
| Escherichia coli | direct interaction   | intact | EBI-1028030 |
| Escherichia coli | association          | intact | EBI-1785808 |
| Escherichia coli | physical association | intact | EBI-1785905 |
| Escherichia coli | physical association | intact | EBI-2679321 |



|                  |             |        |             |
|------------------|-------------|--------|-------------|
| Escherichia coli | association | intact | EBI-888637  |
| Escherichia coli | association | intact | EBI-888637  |
| Escherichia coli | association | intact | EBI-888637  |
| Escherichia coli | association | intact | EBI-1137688 |
| Escherichia coli | association | intact | EBI-1137688 |
| Escherichia coli | association | intact | EBI-1137688 |
| Escherichia coli | association | intact | EBI-1137688 |
| Escherichia coli | association | intact | EBI-888637  |
| Escherichia coli | association | intact | EBI-888637  |
| Escherichia coli | association | intact | EBI-1137688 |
| Escherichia coli | association | intact | EBI-1137688 |
| Escherichia coli | association | intact | EBI-1137688 |
| Escherichia coli | association | intact | EBI-1137688 |
| Escherichia coli | association | intact | EBI-1137688 |
| Escherichia coli | association | intact | EBI-1137688 |
| Escherichia coli | association | intact | EBI-1137688 |
| Escherichia coli | association | intact | EBI-888637  |

|                  |                      |        |             |
|------------------|----------------------|--------|-------------|
| Escherichia coli | association          | intact | EBI-1141359 |
| Escherichia coli | association          | intact | EBI-1141359 |
| Escherichia coli | physical association | intact | EBI-2370615 |
| Escherichia coli | association          | intact | EBI-1141359 |
| Escherichia coli | association          | intact | EBI-1141359 |
| Escherichia coli | association          | intact | EBI-1141359 |

|                  |                      |        |             |
|------------------|----------------------|--------|-------------|
| Escherichia coli | physical association | intact | EBI-2370395 |
| Escherichia coli | physical association | intact | EBI-2370184 |
| Escherichia coli | physical association | intact | EBI-2370398 |

|                  |                      |        |             |
|------------------|----------------------|--------|-------------|
| Escherichia coli | physical association | intact | EBI-2370048 |
| Escherichia coli | physical association | intact | EBI-2370090 |
| Escherichia coli | physical association | intact | EBI-2370057 |
| Escherichia coli | physical association | intact | EBI-2370051 |
| Escherichia coli | physical association | intact | EBI-2370021 |
| Escherichia coli | physical association | intact | EBI-2370060 |
| Escherichia coli | physical association | intact | EBI-2370084 |
| Escherichia coli | physical association | intact | EBI-2370081 |

|                  |             |        |             |
|------------------|-------------|--------|-------------|
| Escherichia coli | association | intact | EBI-1145369 |
| Escherichia coli | association | intact | EBI-1145369 |
| Escherichia coli | association | intact | EBI-1145369 |
| Escherichia coli | association | intact | EBI-1145369 |

|                          |                      |        |             |
|--------------------------|----------------------|--------|-------------|
| Escherichia coli         | association          | intact | EBI-1145369 |
| Escherichia coli         | association          | intact | EBI-1145369 |
| Escherichia coli         | association          | intact | EBI-1145369 |
| Escherichia coli         | association          | intact | EBI-1145369 |
| Escherichia coli         | association          | intact | EBI-1145369 |
| Escherichia coli         | association          | intact | EBI-1145369 |
| Escherichia coli         | association          | intact | EBI-1145369 |
| Escherichia coli         | association          | intact | EBI-1139571 |
| Escherichia coli         | association          | intact | EBI-1139571 |
| Escherichia coli         | association          | intact | EBI-1139571 |
| Escherichia coli         | association          | intact | EBI-1139571 |
| Escherichia coli         | physical association | intact | EBI-1144675 |
| Escherichia coli         | physical association | intact | EBI-1142507 |
| Escherichia coli         | association          | intact | EBI-1147570 |
| Escherichia coli         | association          | intact | EBI-1147570 |
| Escherichia coli         | physical association | intact | EBI-1032969 |
| Escherichia coli         | physical association | intact | EBI-1032986 |
| Escherichia coli         | physical association | intact | EBI-1033003 |
| Escherichia coli         | physical association | intact | EBI-1212123 |
| Escherichia coli         | physical association | intact | EBI-1032969 |
| Escherichia coli         | physical association | intact | EBI-1032986 |
| Escherichia coli         | physical association | intact | EBI-1033003 |
| Escherichia coli         | physical association | intact | EBI-1032969 |
| Escherichia coli         | physical association | intact | EBI-1032986 |
| Escherichia coli         | physical association | intact | EBI-1033003 |
| Escherichia coli O157:H7 | physical association | intact | EBI-1212123 |
| Escherichia coli         | physical association | intact | EBI-1212123 |
| Escherichia coli         | association          | intact | EBI-1147570 |
| Escherichia coli         | physical association | intact | EBI-1212123 |
| Escherichia coli         | physical association | intact | EBI-1212123 |
| Escherichia coli         | physical association | intact | EBI-881875  |
| Escherichia coli         | physical association | intact | EBI-1212123 |
| Escherichia coli         | association          | intact | EBI-1147570 |
| Escherichia coli         | physical association | intact | EBI-906749  |
| Escherichia coli         | association          | intact | EBI-1146778 |
| Escherichia coli         | association          | intact | EBI-1146778 |
| Escherichia coli         | association          | intact | EBI-1146778 |
| Escherichia coli         | association          | intact | EBI-1146778 |
| Escherichia coli         | association          | intact | EBI-1146778 |

|                  |                      |        |             |
|------------------|----------------------|--------|-------------|
| Escherichia coli | association          | intact | EBI-1146778 |
| Escherichia coli | association          | intact | EBI-1146778 |
| Escherichia coli | physical association | intact | EBI-891298  |
| Escherichia coli | association          | intact | EBI-1136364 |
| Escherichia coli | association          | intact | EBI-1136364 |
| Escherichia coli | association          | intact | EBI-1136364 |
| Escherichia coli | association          | intact | EBI-1136369 |
| Escherichia coli | association          | intact | EBI-1136369 |
| Escherichia coli | physical association | intact | EBI-1214320 |
| Escherichia coli | physical association | intact | EBI-1215320 |
| Escherichia coli | physical association | intact | EBI-1214336 |
| Escherichia coli | physical association | intact | EBI-1214345 |
| Escherichia coli | physical association | intact | EBI-1214494 |
| Escherichia coli | physical association | intact | EBI-1214633 |
| Escherichia coli | physical association | intact | EBI-1214554 |
| Escherichia coli | physical association | intact | EBI-1214607 |
| Escherichia coli | association          | intact | EBI-889279  |
| Escherichia coli | association          | intact | EBI-889279  |
| Escherichia coli | association          | intact | EBI-889279  |
| Escherichia coli | association          | intact | EBI-889279  |
| Escherichia coli | physical association | intact | EBI-1214891 |
| Escherichia coli | physical association | intact | EBI-2504348 |
| Escherichia coli | association          | intact | EBI-889279  |
| Escherichia coli | association          | intact | EBI-889279  |
| Escherichia coli | association          | intact | EBI-889279  |
| Escherichia coli | association          | intact | EBI-1135563 |
| Escherichia coli | association          | intact | EBI-889279  |
| Escherichia coli | association          | intact | EBI-1135563 |
| Escherichia coli | association          | intact | EBI-889279  |
| Escherichia coli | association          | intact | EBI-889279  |
| Escherichia coli | association          | intact | EBI-889279  |
| Escherichia coli | association          | intact | EBI-889279  |
| Escherichia coli | association          | intact | EBI-889279  |
| Escherichia coli | association          | intact | EBI-889279  |
| Escherichia coli | association          | intact | EBI-1135563 |
| Escherichia coli | association          | intact | EBI-889279  |
| Escherichia coli | association          | intact | EBI-889279  |

|                  |                      |        |             |
|------------------|----------------------|--------|-------------|
| Escherichia coli | physical association | intact | EBI-2012054 |
| Escherichia coli | association          | intact | EBI-1135563 |
| Escherichia coli | association          | intact | EBI-1135563 |
| Escherichia coli | association          | intact | EBI-1135563 |
| Escherichia coli | direct interaction   | intact | EBI-1029226 |
| Escherichia coli | association          | intact | EBI-885867  |
| Escherichia coli | association          | intact | EBI-885867  |
| Escherichia coli | association          | intact | EBI-885867  |
| Escherichia coli | association          | intact | EBI-885867  |
| Escherichia coli | association          | intact | EBI-1140259 |
| Escherichia coli | association          | intact | EBI-1140259 |
| Escherichia coli | association          | intact | EBI-1147496 |
| Escherichia coli | association          | intact | EBI-1147496 |
| Escherichia coli | physical association | intact | EBI-1137685 |
| Escherichia coli | association          | intact | EBI-1147535 |
| Escherichia coli | association          | intact | EBI-1147535 |
| Escherichia coli | association          | intact | EBI-1147535 |
| Escherichia coli | association          | intact | EBI-888931  |
| Escherichia coli | association          | intact | EBI-888931  |
| Escherichia coli | association          | intact | EBI-890143  |
| Escherichia coli | association          | intact | EBI-890143  |
| Escherichia coli | association          | intact | EBI-888931  |
| Escherichia coli | association          | intact | EBI-888931  |
| Escherichia coli | association          | intact | EBI-888931  |
| Escherichia coli | association          | intact | EBI-888931  |
| Escherichia coli | physical association | intact | EBI-1140784 |
| Escherichia coli | association          | intact | EBI-1141031 |
| Escherichia coli | association          | intact | EBI-1141031 |
| Escherichia coli | physical association | intact | EBI-906820  |
| Escherichia coli | physical association | intact | EBI-906820  |
| Escherichia coli | association          | intact | EBI-1146057 |
| Escherichia coli | association          | intact | EBI-1146057 |



|                  |                      |        |             |
|------------------|----------------------|--------|-------------|
| Escherichia coli | association          | intact | EBI-1141917 |
| Escherichia coli | physical association | intact | EBI-1770955 |

|                  |             |        |             |
|------------------|-------------|--------|-------------|
| Escherichia coli | association | intact | EBI-1144247 |
| Escherichia coli | association | intact | EBI-1144247 |
| Escherichia coli | association | intact | EBI-1144247 |
| Escherichia coli | association | intact | EBI-1144247 |
| Escherichia coli | association | intact | EBI-1144247 |
| Escherichia coli | association | intact | EBI-1144247 |
| Escherichia coli | association | intact | EBI-1144247 |
| Escherichia coli | association | intact | EBI-1144247 |
| Escherichia coli | association | intact | EBI-1144247 |

|                  |             |        |             |
|------------------|-------------|--------|-------------|
| Escherichia coli | association | intact | EBI-1144258 |
| Escherichia coli | association | intact | EBI-1144258 |
| Escherichia coli | association | intact | EBI-1144258 |
| Escherichia coli | association | intact | EBI-1144258 |
| Escherichia coli | association | intact | EBI-1144258 |
| Escherichia coli | association | intact | EBI-1144258 |

|                  |             |        |             |
|------------------|-------------|--------|-------------|
| Escherichia coli | association | intact | EBI-1141693 |
| Escherichia coli | association | intact | EBI-1141693 |
| Escherichia coli | association | intact | EBI-1141693 |

|                  |             |        |             |
|------------------|-------------|--------|-------------|
| Escherichia coli | association | intact | EBI-1142711 |
| Escherichia coli | association | intact | EBI-1142711 |
| Escherichia coli | association | intact | EBI-1142711 |

|                  |                      |        |            |
|------------------|----------------------|--------|------------|
| Escherichia coli | association          | intact | EBI-882023 |
| Escherichia coli | association          | intact | EBI-882023 |
| Escherichia coli | association          | intact | EBI-882023 |
| Escherichia coli | association          | intact | EBI-882023 |
| Escherichia coli | association          | intact | EBI-882023 |
| Escherichia coli | physical association | intact | EBI-878868 |
| Escherichia coli | association          | intact | EBI-882023 |

|                  |             |        |             |
|------------------|-------------|--------|-------------|
| Escherichia coli | association | intact | EBI-1146848 |
| Escherichia coli | association | intact | EBI-1146848 |
| Escherichia coli | association | intact | EBI-1146848 |





|                  |             |        |             |
|------------------|-------------|--------|-------------|
| Escherichia coli | association | intact | EBI-1140371 |
| Escherichia coli | association | intact | EBI-1140371 |
| Escherichia coli | association | intact | EBI-1140371 |
| Escherichia coli | association | intact | EBI-1140371 |
| Escherichia coli | association | intact | EBI-1140371 |

|                  |             |        |             |
|------------------|-------------|--------|-------------|
| Escherichia coli | association | intact | EBI-1136874 |
| Escherichia coli | association | intact | EBI-1136874 |

|                  |                      |        |             |
|------------------|----------------------|--------|-------------|
| Escherichia coli | physical association | intact | EBI-887922  |
| Escherichia coli | physical association | intact | EBI-1145173 |

|                  |             |        |             |
|------------------|-------------|--------|-------------|
| Escherichia coli | association | intact | EBI-1143223 |
| Escherichia coli | association | intact | EBI-1143223 |
| Escherichia coli | association | intact | EBI-1143223 |
| Escherichia coli | association | intact | EBI-1143223 |

|                  |             |        |             |
|------------------|-------------|--------|-------------|
| Escherichia coli | association | intact | EBI-1135932 |
| Escherichia coli | association | intact | EBI-1135932 |
| Escherichia coli | association | intact | EBI-1135932 |
| Escherichia coli | association | intact | EBI-1135932 |
| Escherichia coli | association | intact | EBI-1135932 |

|                  |             |        |             |
|------------------|-------------|--------|-------------|
| Escherichia coli | association | intact | EBI-1138552 |
| Escherichia coli | association | intact | EBI-1138552 |
| Escherichia coli | association | intact | EBI-1138552 |
| Escherichia coli | association | intact | EBI-1138552 |
| Escherichia coli | association | intact | EBI-1138552 |

|                  |             |        |             |
|------------------|-------------|--------|-------------|
| Escherichia coli | association | intact | EBI-1146237 |
| Escherichia coli | association | intact | EBI-1146237 |
| Escherichia coli | association | intact | EBI-1146237 |
| Escherichia coli | association | intact | EBI-1146237 |
| Escherichia coli | association | intact | EBI-1146237 |

|                  |                      |        |             |
|------------------|----------------------|--------|-------------|
| Escherichia coli | physical association | intact | EBI-1771009 |
| Escherichia coli | association          | intact | EBI-1137861 |
| Escherichia coli | association          | intact | EBI-1137861 |
| Escherichia coli | physical association | intact | EBI-906876  |
| Escherichia coli | association          | intact | EBI-1137861 |
| Escherichia coli | association          | intact | EBI-1137861 |
| Escherichia coli | association          | intact | EBI-1137861 |
| Escherichia coli | association          | intact | EBI-1137861 |
| Escherichia coli | association          | intact | EBI-1137861 |
| Escherichia coli | association          | intact | EBI-1137861 |
| Escherichia coli | association          | intact | EBI-1137861 |
| Escherichia coli | physical association | intact | EBI-1147989 |
| Escherichia coli | association          | intact | EBI-1146250 |
| Escherichia coli | association          | intact | EBI-1146250 |
| Escherichia coli | association          | intact | EBI-1143352 |
| Escherichia coli | association          | intact | EBI-884695  |
| Escherichia coli | association          | intact | EBI-884695  |
| Escherichia coli | association          | intact | EBI-891531  |
| Escherichia coli | association          | intact | EBI-1143352 |
| Escherichia coli | association          | intact | EBI-1143352 |
| Escherichia coli | association          | intact | EBI-891531  |
| Escherichia coli | association          | intact | EBI-884695  |
| Escherichia coli | association          | intact | EBI-884695  |
| Escherichia coli | association          | intact | EBI-884695  |
| Escherichia coli | association          | intact | EBI-891531  |
| Escherichia coli | association          | intact | EBI-883047  |
| Escherichia coli | association          | intact | EBI-883047  |
| Escherichia coli | association          | intact | EBI-883047  |
| Escherichia coli | association          | intact | EBI-883047  |
| Escherichia coli | association          | intact | EBI-883047  |
| Escherichia coli | association          | intact | EBI-883047  |
| Escherichia coli | association          | intact | EBI-883047  |
| Escherichia coli | association          | intact | EBI-883047  |
| Escherichia coli | association          | intact | EBI-1145055 |
| Escherichia coli | association          | intact | EBI-883047  |
| Escherichia coli | association          | intact | EBI-1145055 |
| Escherichia coli | association          | intact | EBI-883047  |
| Escherichia coli | association          | intact | EBI-883047  |
| Escherichia coli | association          | intact | EBI-883047  |
| Escherichia coli | association          | intact | EBI-883047  |



|                  |             |        |             |
|------------------|-------------|--------|-------------|
| Escherichia coli | association | intact | EBI-1143469 |
| Escherichia coli | association | intact | EBI-888219  |
| Escherichia coli | association | intact | EBI-1143469 |
| Escherichia coli | association | intact | EBI-888219  |
| Escherichia coli | association | intact | EBI-888219  |
| Escherichia coli | association | intact | EBI-888219  |
| Escherichia coli | association | intact | EBI-888219  |
| Escherichia coli | association | intact | EBI-1143469 |
| Escherichia coli | association | intact | EBI-888219  |
| Escherichia coli | association | intact | EBI-1143469 |
| Escherichia coli | association | intact | EBI-888219  |
| Escherichia coli | association | intact | EBI-1143469 |
| Escherichia coli | association | intact | EBI-888219  |
| Escherichia coli | association | intact | EBI-1143469 |
| Escherichia coli | association | intact | EBI-1143469 |
| Escherichia coli | association | intact | EBI-1143469 |

|                  |             |        |             |
|------------------|-------------|--------|-------------|
| Escherichia coli | association | intact | EBI-1143677 |
| Escherichia coli | association | intact | EBI-1143677 |

|                  |                      |        |             |
|------------------|----------------------|--------|-------------|
| Escherichia coli | physical association | intact | EBI-1146043 |
|------------------|----------------------|--------|-------------|

|                  |                      |        |             |
|------------------|----------------------|--------|-------------|
| Escherichia coli | physical association | intact | EBI-1145586 |
|------------------|----------------------|--------|-------------|

|                  |             |        |             |
|------------------|-------------|--------|-------------|
| Escherichia coli | association | intact | EBI-1143063 |
| Escherichia coli | association | intact | EBI-1143063 |

|                  |                      |        |             |
|------------------|----------------------|--------|-------------|
| Escherichia coli | association          | intact | EBI-1142253 |
| Escherichia coli | association          | intact | EBI-884206  |
| Escherichia coli | physical association | intact | EBI-2369736 |
| Escherichia coli | association          | intact | EBI-884206  |
| Escherichia coli | association          | intact | EBI-884206  |
| Escherichia coli | association          | intact | EBI-884206  |
| Escherichia coli | association          | intact | EBI-884206  |
| Escherichia coli | association          | intact | EBI-884206  |
| Escherichia coli | association          | intact | EBI-884206  |
| Escherichia coli | physical association | intact | EBI-2369477 |
| Escherichia coli | physical association | intact | EBI-2370127 |
| Escherichia coli | association          | intact | EBI-884206  |
| Escherichia coli | physical association | intact | EBI-2370454 |

|                  |                      |        |             |
|------------------|----------------------|--------|-------------|
| Escherichia coli | association          | intact | EBI-884206  |
| Escherichia coli | association          | intact | EBI-891237  |
| Escherichia coli | association          | intact | EBI-1142253 |
| Escherichia coli | association          | intact | EBI-884206  |
| Escherichia coli | association          | intact | EBI-884206  |
| Escherichia coli | association          | intact | EBI-884206  |
| Escherichia coli | association          | intact | EBI-1142253 |
| Escherichia coli | association          | intact | EBI-884206  |
| Escherichia coli | association          | intact | EBI-884206  |
| Escherichia coli | association          | intact | EBI-884206  |
| Escherichia coli | association          | intact | EBI-884206  |
| Escherichia coli | physical association | intact | EBI-2370532 |
| Escherichia coli | physical association | intact | EBI-2370560 |
| Escherichia coli | association          | intact | EBI-884206  |
| Escherichia coli | association          | intact | EBI-1142253 |
| Escherichia coli | physical association | intact | EBI-2370585 |
| Escherichia coli | association          | intact | EBI-1142253 |
| Escherichia coli | association          | intact | EBI-884206  |
| Escherichia coli | association          | intact | EBI-884206  |
| Escherichia coli | association          | intact | EBI-1142253 |
| Escherichia coli | association          | intact | EBI-1142253 |
| Escherichia coli | association          | intact | EBI-884206  |
| Escherichia coli | association          | intact | EBI-884206  |

|                  |                      |        |             |
|------------------|----------------------|--------|-------------|
| Escherichia coli | association          | intact | EBI-884130  |
| Escherichia coli | association          | intact | EBI-884130  |
| Escherichia coli | association          | intact | EBI-891214  |
| Escherichia coli | association          | intact | EBI-884130  |
| Escherichia coli | association          | intact | EBI-891214  |
| Escherichia coli | association          | intact | EBI-884130  |
| Escherichia coli | physical association | intact | EBI-1770964 |
| Escherichia coli | association          | intact | EBI-884130  |
| Escherichia coli | association          | intact | EBI-891214  |
| Escherichia coli | association          | intact | EBI-884130  |
| Escherichia coli | association          | intact | EBI-884130  |
| Escherichia coli | association          | intact | EBI-891214  |
| Escherichia coli | association          | intact | EBI-884130  |
| Escherichia coli | association          | intact | EBI-884130  |
| Escherichia coli | association          | intact | EBI-891214  |
| Escherichia coli | association          | intact | EBI-884130  |

|                  |             |        |             |
|------------------|-------------|--------|-------------|
| Escherichia coli | association | intact | EBI-1141522 |
|------------------|-------------|--------|-------------|

|                  |             |        |             |
|------------------|-------------|--------|-------------|
| Escherichia coli | association | intact | EBI-1141522 |
| Escherichia coli | association | intact | EBI-1141522 |

|                  |             |        |             |
|------------------|-------------|--------|-------------|
| Escherichia coli | association | intact | EBI-1140294 |
| Escherichia coli | association | intact | EBI-1140294 |
| Escherichia coli | association | intact | EBI-1140294 |

|                  |                      |        |             |
|------------------|----------------------|--------|-------------|
| Escherichia coli | association          | intact | EBI-887624  |
| Escherichia coli | association          | intact | EBI-887624  |
| Escherichia coli | association          | intact | EBI-887624  |
| Escherichia coli | association          | intact | EBI-1138489 |
| Escherichia coli | association          | intact | EBI-887624  |
| Escherichia coli | association          | intact | EBI-887624  |
| Escherichia coli | association          | intact | EBI-887624  |
| Escherichia coli | association          | intact | EBI-1138489 |
| Escherichia coli | association          | intact | EBI-887624  |
| Escherichia coli | physical association | intact | EBI-880994  |
| Escherichia coli | association          | intact | EBI-887624  |
| Escherichia coli | association          | intact | EBI-887624  |
| Escherichia coli | association          | intact | EBI-887624  |
| Escherichia coli | association          | intact | EBI-887624  |
| Escherichia coli | association          | intact | EBI-887624  |
| Escherichia coli | association          | intact | EBI-887624  |
| Escherichia coli | association          | intact | EBI-887624  |
| Escherichia coli | association          | intact | EBI-887624  |
| Escherichia coli | association          | intact | EBI-887624  |
| Escherichia coli | association          | intact | EBI-887624  |
| Escherichia coli | association          | intact | EBI-887624  |
| Escherichia coli | association          | intact | EBI-887624  |
| Escherichia coli | association          | intact | EBI-887624  |

|                  |             |        |             |
|------------------|-------------|--------|-------------|
| Escherichia coli | association | intact | EBI-1136394 |
| Escherichia coli | association | intact | EBI-1136394 |
| Escherichia coli | association | intact | EBI-1136394 |

|                  |                      |        |            |
|------------------|----------------------|--------|------------|
| Escherichia coli | physical association | intact | EBI-907303 |
|------------------|----------------------|--------|------------|







|                  |             |        |             |
|------------------|-------------|--------|-------------|
| Escherichia coli | association | intact | EBI-1138875 |
| Escherichia coli | association | intact | EBI-893639  |
| Escherichia coli | association | intact | EBI-1138875 |
| Escherichia coli | association | intact | EBI-893639  |

|                  |             |        |             |
|------------------|-------------|--------|-------------|
| Escherichia coli | association | intact | EBI-1141657 |
| Escherichia coli | association | intact | EBI-1141657 |

|                  |             |        |             |
|------------------|-------------|--------|-------------|
| Escherichia coli | association | intact | EBI-1141650 |
| Escherichia coli | association | intact | EBI-1141650 |

|                  |             |        |             |
|------------------|-------------|--------|-------------|
| Escherichia coli | association | intact | EBI-1141644 |
| Escherichia coli | association | intact | EBI-1141644 |
| Escherichia coli | association | intact | EBI-1141644 |

|                  |                      |        |             |
|------------------|----------------------|--------|-------------|
| Escherichia coli | physical association | intact | EBI-1146271 |
| Escherichia coli | association          | intact | EBI-884306  |
| Escherichia coli | association          | intact | EBI-891254  |
| Escherichia coli | association          | intact | EBI-884306  |
| Escherichia coli | association          | intact | EBI-884306  |
| Escherichia coli | association          | intact | EBI-884306  |
| Escherichia coli | association          | intact | EBI-891254  |
| Escherichia coli | association          | intact | EBI-891254  |
| Escherichia coli | association          | intact | EBI-884306  |
| Escherichia coli | association          | intact | EBI-891254  |
| Escherichia coli | association          | intact | EBI-891254  |
| Escherichia coli | association          | intact | EBI-891254  |
| Escherichia coli | association          | intact | EBI-884306  |
| Escherichia coli | association          | intact | EBI-891254  |
| Escherichia coli | association          | intact | EBI-891254  |
| Escherichia coli | association          | intact | EBI-891254  |

|                  |             |        |             |
|------------------|-------------|--------|-------------|
| Escherichia coli | association | intact | EBI-895331  |
| Escherichia coli | association | intact | EBI-895331  |
| Escherichia coli | association | intact | EBI-1139271 |
| Escherichia coli | association | intact | EBI-890481  |
| Escherichia coli | association | intact | EBI-890481  |
| Escherichia coli | association | intact | EBI-890481  |
| Escherichia coli | association | intact | EBI-1139271 |

|                  |             |        |             |
|------------------|-------------|--------|-------------|
| Escherichia coli | association | intact | EBI-895331  |
| Escherichia coli | association | intact | EBI-895331  |
| Escherichia coli | association | intact | EBI-890481  |
| Escherichia coli | association | intact | EBI-890481  |
| Escherichia coli | association | intact | EBI-890481  |
| Escherichia coli | association | intact | EBI-895331  |
| Escherichia coli | association | intact | EBI-1139271 |
| Escherichia coli | association | intact | EBI-890481  |
| Escherichia coli | association | intact | EBI-890481  |
| Escherichia coli | association | intact | EBI-895331  |
| Escherichia coli | association | intact | EBI-1139271 |
| Escherichia coli | association | intact | EBI-1139271 |
| Escherichia coli | association | intact | EBI-890481  |
| Escherichia coli | association | intact | EBI-1139271 |
| Escherichia coli | association | intact | EBI-890481  |

|                  |             |        |            |
|------------------|-------------|--------|------------|
| Escherichia coli | association | intact | EBI-884859 |
| Escherichia coli | association | intact | EBI-884859 |
| Escherichia coli | association | intact | EBI-884859 |
| Escherichia coli | association | intact | EBI-884859 |
| Escherichia coli | association | intact | EBI-884859 |
| Escherichia coli | association | intact | EBI-884859 |
| Escherichia coli | association | intact | EBI-884859 |
| Escherichia coli | association | intact | EBI-884859 |
| Escherichia coli | association | intact | EBI-884859 |
| Escherichia coli | association | intact | EBI-884859 |
| Escherichia coli | association | intact | EBI-884859 |
| Escherichia coli | association | intact | EBI-884859 |

|                  |             |        |             |
|------------------|-------------|--------|-------------|
| Escherichia coli | association | intact | EBI-1143130 |
| Escherichia coli | association | intact | EBI-1143130 |
| Escherichia coli | association | intact | EBI-1143130 |
| Escherichia coli | association | intact | EBI-1143130 |
| Escherichia coli | association | intact | EBI-1143130 |

|                  |             |        |             |
|------------------|-------------|--------|-------------|
| Escherichia coli | association | intact | EBI-1143130 |
| Escherichia coli | association | intact | EBI-878924  |
| Escherichia coli | association | intact | EBI-882104  |
| Escherichia coli | association | intact | EBI-1143130 |
| Escherichia coli | association | intact | EBI-882104  |
| Escherichia coli | association | intact | EBI-878924  |
| Escherichia coli | association | intact | EBI-1143130 |
| Escherichia coli | association | intact | EBI-1143130 |
| Escherichia coli | association | intact | EBI-1143130 |
| Escherichia coli | association | intact | EBI-882104  |
| Escherichia coli | association | intact | EBI-1143130 |
| Escherichia coli | association | intact | EBI-1143130 |
| Escherichia coli | association | intact | EBI-882104  |
| Escherichia coli | association | intact | EBI-1143130 |
| Escherichia coli | association | intact | EBI-1143130 |
| Escherichia coli | association | intact | EBI-878924  |
| Escherichia coli | association | intact | EBI-882104  |
| Escherichia coli | association | intact | EBI-882104  |
| Escherichia coli | association | intact | EBI-1143130 |

|                  |                      |        |            |
|------------------|----------------------|--------|------------|
| Escherichia coli | association          | intact | EBI-888653 |
| Escherichia coli | association          | intact | EBI-888653 |
| Escherichia coli | physical association | intact | EBI-881279 |
| Escherichia coli | association          | intact | EBI-888653 |
| Escherichia coli | association          | intact | EBI-888653 |
| Escherichia coli | association          | intact | EBI-888653 |
| Escherichia coli | association          | intact | EBI-888653 |
| Escherichia coli | association          | intact | EBI-888653 |
| Escherichia coli | association          | intact | EBI-888653 |
| Escherichia coli | association          | intact | EBI-888653 |
| Escherichia coli | association          | intact | EBI-888653 |

|                  |             |        |             |
|------------------|-------------|--------|-------------|
| Escherichia coli | association | intact | EBI-1145795 |
| Escherichia coli | association | intact | EBI-888700  |
| Escherichia coli | association | intact | EBI-1145795 |
| Escherichia coli | association | intact | EBI-1145795 |
| Escherichia coli | association | intact | EBI-1145795 |
| Escherichia coli | association | intact | EBI-888700  |
| Escherichia coli | association | intact | EBI-888700  |
| Escherichia coli | association | intact | EBI-888700  |
| Escherichia coli | association | intact | EBI-1145795 |
| Escherichia coli | association | intact | EBI-888700  |
| Escherichia coli | association | intact | EBI-888700  |





|                  |             |        |             |
|------------------|-------------|--------|-------------|
| Escherichia coli | association | intact | EBI-886859  |
| Escherichia coli | association | intact | EBI-886859  |
| Escherichia coli | association | intact | EBI-880750  |
| Escherichia coli | association | intact | EBI-880750  |
| Escherichia coli | association | intact | EBI-880750  |
| Escherichia coli | association | intact | EBI-886859  |
| Escherichia coli | association | intact | EBI-880750  |
| Escherichia coli | association | intact | EBI-1147088 |
| Escherichia coli | association | intact | EBI-1147088 |
| Escherichia coli | association | intact | EBI-1147088 |
| Escherichia coli | association | intact | EBI-886859  |
| Escherichia coli | association | intact | EBI-886859  |

|                  |                      |        |             |
|------------------|----------------------|--------|-------------|
| Escherichia coli | physical association | intact | EBI-1136800 |
| Escherichia coli | association          | intact | EBI-894374  |
| Escherichia coli | association          | intact | EBI-894374  |
| Escherichia coli | association          | intact | EBI-894374  |
| Escherichia coli | association          | intact | EBI-894374  |
| Escherichia coli | association          | intact | EBI-894374  |
| Escherichia coli | association          | intact | EBI-894374  |
| Escherichia coli | physical association | intact | EBI-889372  |
| Escherichia coli | association          | intact | EBI-894374  |
| Escherichia coli | association          | intact | EBI-894374  |
| Escherichia coli | association          | intact | EBI-894374  |
| Escherichia coli | association          | intact | EBI-894374  |
| Escherichia coli | association          | intact | EBI-894374  |
| Escherichia coli | association          | intact | EBI-894374  |

|                  |             |        |             |
|------------------|-------------|--------|-------------|
| Escherichia coli | association | intact | EBI-1144514 |
| Escherichia coli | association | intact | EBI-1144514 |
| Escherichia coli | association | intact | EBI-1144514 |
| Escherichia coli | association | intact | EBI-1144514 |

|                  |             |        |             |
|------------------|-------------|--------|-------------|
| Escherichia coli | association | intact | EBI-1147874 |
| Escherichia coli | association | intact | EBI-1147874 |

|                  |                      |        |             |
|------------------|----------------------|--------|-------------|
| Escherichia coli | association          | intact | EBI-1147874 |
| Escherichia coli | association          | intact | EBI-1147874 |
| Escherichia coli | physical association | intact | EBI-885803  |
| Escherichia coli | association          | intact | EBI-892341  |
| Escherichia coli | association          | intact | EBI-892341  |
| Escherichia coli | association          | intact | EBI-892341  |
| Escherichia coli | association          | intact | EBI-892341  |
| Escherichia coli | association          | intact | EBI-892341  |
| Escherichia coli | association          | intact | EBI-892341  |
| Escherichia coli | association          | intact | EBI-892341  |
| Escherichia coli | association          | intact | EBI-892341  |
| Escherichia coli | association          | intact | EBI-892341  |
| Escherichia coli | association          | intact | EBI-892341  |
| Escherichia coli | physical association | intact | EBI-1147301 |
| Escherichia coli | association          | intact | EBI-892341  |
| Escherichia coli | association          | intact | EBI-892341  |
| Escherichia coli | association          | intact | EBI-892341  |
| Escherichia coli | association          | intact | EBI-892341  |
| Escherichia coli | association          | intact | EBI-1138992 |
| Escherichia coli | association          | intact | EBI-1138992 |
| Escherichia coli | association          | intact | EBI-1138992 |
| Escherichia coli | association          | intact | EBI-1138992 |
| Escherichia coli | association          | intact | EBI-1138266 |
| Escherichia coli | association          | intact | EBI-1138266 |
| Escherichia coli | association          | intact | EBI-1138266 |
| Escherichia coli | association          | intact | EBI-1144996 |
| Escherichia coli | association          | intact | EBI-1144996 |
| Escherichia coli | association          | intact | EBI-1144996 |
| Escherichia coli | association          | intact | EBI-894820  |
| Escherichia coli | association          | intact | EBI-1144996 |
| Escherichia coli | association          | intact | EBI-1144996 |
| Escherichia coli | association          | intact | EBI-1144996 |
| Escherichia coli | association          | intact | EBI-894820  |
| Escherichia coli | association          | intact | EBI-894820  |
| Escherichia coli | association          | intact | EBI-1144996 |
| Escherichia coli | association          | intact | EBI-894820  |
| Escherichia coli | association          | intact | EBI-1144996 |
| Escherichia coli | association          | intact | EBI-1144996 |
| Escherichia coli | association          | intact | EBI-889882  |
| Escherichia coli | association          | intact | EBI-1144996 |





|                  |             |        |            |
|------------------|-------------|--------|------------|
| Escherichia coli | association | intact | EBI-883484 |
| Escherichia coli | association | intact | EBI-883484 |
| Escherichia coli | association | intact | EBI-883484 |
| Escherichia coli | association | intact | EBI-883484 |
| Escherichia coli | association | intact | EBI-883484 |
| Escherichia coli | association | intact | EBI-883484 |
| Escherichia coli | association | intact | EBI-883484 |
| Escherichia coli | association | intact | EBI-883484 |
| Escherichia coli | association | intact | EBI-883484 |
| Escherichia coli | association | intact | EBI-883484 |
| Escherichia coli | association | intact | EBI-883484 |
| Escherichia coli | association | intact | EBI-883484 |

|                  |                    |        |             |
|------------------|--------------------|--------|-------------|
| Escherichia coli | direct interaction | intact | EBI-1038181 |
| Escherichia coli | direct interaction | intact | EBI-1040048 |

|                  |             |        |            |
|------------------|-------------|--------|------------|
| Escherichia coli | association | intact | EBI-894562 |
| Escherichia coli | association | intact | EBI-889553 |
| Escherichia coli | association | intact | EBI-889553 |
| Escherichia coli | association | intact | EBI-894562 |

|                  |             |        |             |
|------------------|-------------|--------|-------------|
| Escherichia coli | association | intact | EBI-894403  |
| Escherichia coli | association | intact | EBI-894403  |
| Escherichia coli | association | intact | EBI-894403  |
| Escherichia coli | association | intact | EBI-889390  |
| Escherichia coli | association | intact | EBI-1147698 |
| Escherichia coli | association | intact | EBI-1147698 |
| Escherichia coli | association | intact | EBI-889390  |
| Escherichia coli | association | intact | EBI-889390  |
| Escherichia coli | association | intact | EBI-889390  |
| Escherichia coli | association | intact | EBI-1147698 |
| Escherichia coli | association | intact | EBI-889390  |
| Escherichia coli | association | intact | EBI-894403  |
| Escherichia coli | association | intact | EBI-1147698 |
| Escherichia coli | association | intact | EBI-1147698 |
| Escherichia coli | association | intact | EBI-1147698 |
| Escherichia coli | association | intact | EBI-894403  |
| Escherichia coli | association | intact | EBI-894403  |

|                  |                      |        |             |
|------------------|----------------------|--------|-------------|
| Escherichia coli | association          | intact | EBI-894403  |
| Escherichia coli | association          | intact | EBI-894403  |
| Escherichia coli | association          | intact | EBI-894403  |
| Escherichia coli | association          | intact | EBI-894403  |
| Escherichia coli | association          | intact | EBI-889390  |
| Escherichia coli | association          | intact | EBI-894403  |
| Escherichia coli | association          | intact | EBI-894403  |
| Escherichia coli | association          | intact | EBI-894403  |
| Escherichia coli | association          | intact | EBI-894403  |
| Escherichia coli | association          | intact | EBI-894403  |
| Escherichia coli | association          | intact | EBI-894403  |
| Escherichia coli | association          | intact | EBI-894403  |
| Escherichia coli | association          | intact | EBI-894403  |
| Escherichia coli | association          | intact | EBI-894403  |
| Escherichia coli | association          | intact | EBI-894403  |
| Escherichia coli | association          | intact | EBI-894403  |
| Escherichia coli | association          | intact | EBI-889390  |
| Escherichia coli | association          | intact | EBI-894403  |
| Escherichia coli | association          | intact | EBI-894403  |
| Escherichia coli | association          | intact | EBI-894403  |
| Escherichia coli | association          | intact | EBI-1143152 |
| Escherichia coli | physical association | intact | EBI-767046  |
| Escherichia coli | physical association | intact | EBI-767059  |
| Escherichia coli | association          | intact | EBI-1143152 |
| Escherichia coli | association          | intact | EBI-1143152 |
| Escherichia coli | association          | intact | EBI-1143160 |
| Escherichia coli | association          | intact | EBI-1143160 |
| Escherichia coli | association          | intact | EBI-887896  |
| Escherichia coli | association          | intact | EBI-887896  |
| Escherichia coli | association          | intact | EBI-1143160 |
| Escherichia coli | association          | intact | EBI-1143160 |
| Escherichia coli | association          | intact | EBI-893577  |
| Escherichia coli | association          | intact | EBI-1143160 |
| Escherichia coli | association          | intact | EBI-1143160 |
| Escherichia coli | covalent binding     | intact | EBI-604068  |
| Escherichia coli | association          | intact | EBI-887896  |
| Escherichia coli | association          | intact | EBI-893577  |
| Escherichia coli | association          | intact | EBI-887896  |
| Escherichia coli | association          | intact | EBI-1143160 |
| Escherichia coli | association          | intact | EBI-893577  |
| Escherichia coli | association          | intact | EBI-1143160 |

|                  |                      |        |             |
|------------------|----------------------|--------|-------------|
| Escherichia coli | association          | intact | EBI-1143812 |
| Escherichia coli | association          | intact | EBI-888016  |
| Escherichia coli | physical association | intact | EBI-893838  |
| Escherichia coli | physical association | intact | EBI-881071  |
| Escherichia coli | association          | intact | EBI-888016  |
| Escherichia coli | association          | intact | EBI-1143812 |
| Escherichia coli | association          | intact | EBI-1143812 |

|                  |             |        |             |
|------------------|-------------|--------|-------------|
| Escherichia coli | association | intact | EBI-1142089 |
| Escherichia coli | association | intact | EBI-1142089 |

|                  |             |        |             |
|------------------|-------------|--------|-------------|
| Escherichia coli | association | intact | EBI-1147000 |
| Escherichia coli | association | intact | EBI-1147000 |
| Escherichia coli | association | intact | EBI-1147000 |
| Escherichia coli | association | intact | EBI-1147000 |

|                  |                      |        |             |
|------------------|----------------------|--------|-------------|
| Escherichia coli | association          | intact | EBI-1136803 |
| Escherichia coli | association          | intact | EBI-1136803 |
| Escherichia coli | association          | intact | EBI-1136803 |
| Escherichia coli | physical association | intact | EBI-888368  |
| Escherichia coli | physical association | intact | EBI-893785  |

|                  |             |        |             |
|------------------|-------------|--------|-------------|
| Escherichia coli | association | intact | EBI-1147123 |
| Escherichia coli | association | intact | EBI-1147123 |
| Escherichia coli | association | intact | EBI-1147123 |
| Escherichia coli | association | intact | EBI-1147123 |

|                  |             |        |             |
|------------------|-------------|--------|-------------|
| Escherichia coli | association | intact | EBI-1146265 |
| Escherichia coli | association | intact | EBI-1146265 |
| Escherichia coli | association | intact | EBI-1146265 |
| Escherichia coli | association | intact | EBI-1146265 |

|                  |                      |        |             |
|------------------|----------------------|--------|-------------|
| Escherichia coli | association          | intact | EBI-888863  |
| Escherichia coli | association          | intact | EBI-888863  |
| Escherichia coli | association          | intact | EBI-1138355 |
| Escherichia coli | association          | intact | EBI-888863  |
| Escherichia coli | association          | intact | EBI-888863  |
| Escherichia coli | physical association | intact | EBI-881333  |
| Escherichia coli | association          | intact | EBI-1138355 |
| Escherichia coli | association          | intact | EBI-888863  |





|                  |             |        |             |
|------------------|-------------|--------|-------------|
| Escherichia coli | association | intact | EBI-1146220 |
| Escherichia coli | association | intact | EBI-892932  |
| Escherichia coli | association | intact | EBI-1146220 |
| Escherichia coli | association | intact | EBI-1146220 |
| Escherichia coli | association | intact | EBI-1146220 |
| Escherichia coli | association | intact | EBI-892932  |
| Escherichia coli | association | intact | EBI-892932  |
| Escherichia coli | association | intact | EBI-892932  |
| Escherichia coli | association | intact | EBI-1146220 |
| Escherichia coli | association | intact | EBI-892932  |
| Escherichia coli | association | intact | EBI-892932  |

|                  |             |        |             |
|------------------|-------------|--------|-------------|
| Escherichia coli | association | intact | EBI-1136659 |
| Escherichia coli | association | intact | EBI-1136659 |
| Escherichia coli | association | intact | EBI-889577  |
| Escherichia coli | association | intact | EBI-894571  |
| Escherichia coli | association | intact | EBI-1136659 |
| Escherichia coli | association | intact | EBI-889577  |
| Escherichia coli | association | intact | EBI-894571  |
| Escherichia coli | association | intact | EBI-889577  |
| Escherichia coli | association | intact | EBI-894571  |
| Escherichia coli | association | intact | EBI-894571  |
| Escherichia coli | association | intact | EBI-889577  |
| Escherichia coli | association | intact | EBI-889577  |
| Escherichia coli | association | intact | EBI-894571  |
| Escherichia coli | association | intact | EBI-889577  |
| Escherichia coli | association | intact | EBI-889577  |
| Escherichia coli | association | intact | EBI-894571  |
| Escherichia coli | association | intact | EBI-894571  |
| Escherichia coli | association | intact | EBI-1136659 |
| Escherichia coli | association | intact | EBI-1136659 |
| Escherichia coli | association | intact | EBI-894571  |
| Escherichia coli | association | intact | EBI-894571  |

|                  |                      |        |             |
|------------------|----------------------|--------|-------------|
| Escherichia coli | physical association | intact | EBI-985197  |
| Escherichia coli | physical association | intact | EBI-1214251 |

|                  |             |        |             |
|------------------|-------------|--------|-------------|
| Escherichia coli | association | intact | EBI-1135819 |
| Escherichia coli | association | intact | EBI-892532  |
| Escherichia coli | association | intact | EBI-892532  |
| Escherichia coli | association | intact | EBI-1135819 |
| Escherichia coli | association | intact | EBI-892532  |





|                  |             |        |             |
|------------------|-------------|--------|-------------|
| Escherichia coli | association | intact | EBI-892581  |
| Escherichia coli | association | intact | EBI-892581  |
| Escherichia coli | association | intact | EBI-1135833 |
| Escherichia coli | association | intact | EBI-892599  |
| Escherichia coli | association | intact | EBI-892599  |
| Escherichia coli | association | intact | EBI-892599  |
| Escherichia coli | association | intact | EBI-886059  |
| Escherichia coli | association | intact | EBI-892599  |
| Escherichia coli | association | intact | EBI-892599  |
| Escherichia coli | association | intact | EBI-1135798 |
| Escherichia coli | association | intact | EBI-892599  |
| Escherichia coli | association | intact | EBI-886059  |
| Escherichia coli | association | intact | EBI-1135798 |
| Escherichia coli | association | intact | EBI-1135798 |
| Escherichia coli | association | intact | EBI-886059  |
| Escherichia coli | association | intact | EBI-886059  |
| Escherichia coli | association | intact | EBI-1135798 |
| Escherichia coli | association | intact | EBI-892599  |
| Escherichia coli | association | intact | EBI-892599  |
| Escherichia coli | association | intact | EBI-886059  |
| Escherichia coli | association | intact | EBI-892599  |
| Escherichia coli | association | intact | EBI-1135798 |
| Escherichia coli | association | intact | EBI-892599  |
| Escherichia coli | association | intact | EBI-892599  |
| Escherichia coli | association | intact | EBI-886059  |
| Escherichia coli | association | intact | EBI-892599  |
| Escherichia coli | association | intact | EBI-892599  |
| Escherichia coli | association | intact | EBI-886059  |
| Escherichia coli | association | intact | EBI-1135798 |
| Escherichia coli | association | intact | EBI-892599  |
| Escherichia coli | association | intact | EBI-892599  |
| Escherichia coli | association | intact | EBI-886059  |
| Escherichia coli | association | intact | EBI-1135798 |
| Escherichia coli | association | intact | EBI-886059  |
| Escherichia coli | association | intact | EBI-892599  |
| Escherichia coli | association | intact | EBI-1135798 |
| Escherichia coli | association | intact | EBI-892599  |

|                  |                      |        |             |
|------------------|----------------------|--------|-------------|
| Escherichia coli | association          | intact | EBI-1135798 |
| Escherichia coli | association          | intact | EBI-892599  |
| Escherichia coli | association          | intact | EBI-892599  |
| Escherichia coli | association          | intact | EBI-1135798 |
| Escherichia coli | association          | intact | EBI-892599  |
| Escherichia coli | association          | intact | EBI-886059  |
| Escherichia coli | association          | intact | EBI-892599  |
| Escherichia coli | association          | intact | EBI-892599  |
| Escherichia coli | association          | intact | EBI-886059  |
| Escherichia coli | association          | intact | EBI-1135798 |
| Escherichia coli | association          | intact | EBI-892599  |
| Escherichia coli | association          | intact | EBI-886059  |
| Escherichia coli | association          | intact | EBI-892599  |
| Escherichia coli | association          | intact | EBI-886059  |
| Escherichia coli | association          | intact | EBI-1135798 |
| Escherichia coli | association          | intact | EBI-892599  |
| Escherichia coli | association          | intact | EBI-1135798 |
| Escherichia coli | association          | intact | EBI-886059  |
| Escherichia coli | association          | intact | EBI-886059  |
| Escherichia coli | association          | intact | EBI-886059  |
| Escherichia coli | association          | intact | EBI-892599  |
| Escherichia coli | association          | intact | EBI-892599  |
| Escherichia coli | association          | intact | EBI-892599  |
| Escherichia coli | association          | intact | EBI-1138286 |
| Escherichia coli | association          | intact | EBI-1138286 |
| Escherichia coli | physical association | intact | EBI-1138216 |
| Escherichia coli | association          | intact | EBI-1143673 |
| Escherichia coli | physical association | intact | EBI-889967  |
| Escherichia coli | association          | intact | EBI-1143673 |
| Escherichia coli | physical association | intact | EBI-1137152 |
| Escherichia coli | physical association | intact | EBI-1144129 |

|                  |             |        |            |
|------------------|-------------|--------|------------|
| Escherichia coli | association | intact | EBI-879887 |
| Escherichia coli | association | intact | EBI-879887 |
| Escherichia coli | association | intact | EBI-879887 |
| Escherichia coli | association | intact | EBI-879887 |
| Escherichia coli | association | intact | EBI-879887 |
| Escherichia coli | association | intact | EBI-879887 |
| Escherichia coli | association | intact | EBI-879887 |
| Escherichia coli | association | intact | EBI-879887 |
| Escherichia coli | association | intact | EBI-879887 |
| Escherichia coli | association | intact | EBI-879887 |

|                  |             |        |             |
|------------------|-------------|--------|-------------|
| Escherichia coli | association | intact | EBI-1140263 |
| Escherichia coli | association | intact | EBI-1140263 |
| Escherichia coli | association | intact | EBI-1140263 |
| Escherichia coli | association | intact | EBI-1140263 |
| Escherichia coli | association | intact | EBI-1140263 |
| Escherichia coli | association | intact | EBI-1140263 |
| Escherichia coli | association | intact | EBI-892424  |
| Escherichia coli | association | intact | EBI-1140263 |
| Escherichia coli | association | intact | EBI-1140263 |
| Escherichia coli | association | intact | EBI-892424  |
| Escherichia coli | association | intact | EBI-892424  |
| Escherichia coli | association | intact | EBI-1140263 |
| Escherichia coli | association | intact | EBI-892424  |
| Escherichia coli | association | intact | EBI-1140263 |
| Escherichia coli | association | intact | EBI-1140263 |
| Escherichia coli | association | intact | EBI-1140263 |
| Escherichia coli | association | intact | EBI-1140263 |
| Escherichia coli | association | intact | EBI-1140263 |
| Escherichia coli | association | intact | EBI-1140263 |

|                  |                      |        |             |
|------------------|----------------------|--------|-------------|
| Escherichia coli | physical association | intact | EBI-1147286 |
|------------------|----------------------|--------|-------------|

|                  |                      |        |             |
|------------------|----------------------|--------|-------------|
| Escherichia coli | physical association | intact | EBI-1771504 |
|------------------|----------------------|--------|-------------|

|                  |             |        |             |
|------------------|-------------|--------|-------------|
| Escherichia coli | association | intact | EBI-1144586 |
|------------------|-------------|--------|-------------|

|                  |             |        |             |
|------------------|-------------|--------|-------------|
| Escherichia coli | association | intact | EBI-1144586 |
|------------------|-------------|--------|-------------|

|                  |                      |        |             |
|------------------|----------------------|--------|-------------|
| Escherichia coli | association          | intact | EBI-1145248 |
| Escherichia coli | association          | intact | EBI-1145248 |
| Escherichia coli | physical association | intact | EBI-1771534 |
| Escherichia coli | physical association | intact | EBI-1771534 |
| Escherichia coli | physical association | intact | EBI-1771534 |
| Escherichia coli | physical association | intact | EBI-1213360 |
| Escherichia coli | physical association | intact | EBI-1213360 |
| Escherichia coli | physical association | intact | EBI-884495  |
| Escherichia coli | association          | intact | EBI-891396  |
| Escherichia coli | association          | intact | EBI-1142375 |
| Escherichia coli | association          | intact | EBI-1142375 |
| Escherichia coli | association          | intact | EBI-891396  |
| Escherichia coli | association          | intact | EBI-1146747 |
| Escherichia coli | association          | intact | EBI-1146747 |
| Escherichia coli | association          | intact | EBI-1146747 |
| Escherichia coli | association          | intact | EBI-1146747 |
| Escherichia coli | association          | intact | EBI-1147304 |
| Escherichia coli | association          | intact | EBI-1147304 |
| Escherichia coli | association          | intact | EBI-1147304 |
| Escherichia coli | association          | intact | EBI-1147304 |
| Escherichia coli | association          | intact | EBI-1144372 |
| Escherichia coli | association          | intact | EBI-1144372 |
| Escherichia coli | association          | intact | EBI-889076  |
| Escherichia coli | association          | intact | EBI-881611  |
| Escherichia coli | association          | intact | EBI-881611  |
| Escherichia coli | association          | intact | EBI-889076  |
| Escherichia coli | association          | intact | EBI-881611  |
| Escherichia coli | association          | intact | EBI-1144372 |
| Escherichia coli | physical association | intact | EBI-2369513 |
| Escherichia coli | physical association | intact | EBI-2370142 |
| Escherichia coli | physical association | intact | EBI-2370442 |
| Escherichia coli | physical association | intact | EBI-2370093 |
| Escherichia coli | association          | intact | EBI-1144372 |
| Escherichia coli | association          | intact | EBI-881611  |
| Escherichia coli | association          | intact | EBI-1144372 |
| Escherichia coli | association          | intact | EBI-1144372 |
| Escherichia coli | association          | intact | EBI-881611  |
| Escherichia coli | association          | intact | EBI-881611  |

|                  |                      |        |             |
|------------------|----------------------|--------|-------------|
| Escherichia coli | association          | intact | EBI-881611  |
| Escherichia coli | association          | intact | EBI-1144372 |
| Escherichia coli | association          | intact | EBI-881611  |
| Escherichia coli | physical association | intact | EBI-2369443 |
| Escherichia coli | association          | intact | EBI-1144372 |
| Escherichia coli | physical association | intact | EBI-1135924 |
| Escherichia coli | association          | intact | EBI-1138903 |
| Escherichia coli | association          | intact | EBI-1138903 |
| Escherichia coli | association          | intact | EBI-1138903 |
| Escherichia coli | association          | intact | EBI-1138903 |
| Escherichia coli | association          | intact | EBI-1138903 |
| Escherichia coli | association          | intact | EBI-893742  |
| Escherichia coli | association          | intact | EBI-1138903 |
| Escherichia coli | association          | intact | EBI-893742  |
| Escherichia coli | association          | intact | EBI-1137637 |
| Escherichia coli | association          | intact | EBI-1137637 |
| Escherichia coli | association          | intact | EBI-879008  |
| Escherichia coli | association          | intact | EBI-882228  |
| Escherichia coli | association          | intact | EBI-882228  |
| Escherichia coli | association          | intact | EBI-879008  |
| Escherichia coli | association          | intact | EBI-1137637 |
| Escherichia coli | association          | intact | EBI-1137637 |
| Escherichia coli | association          | intact | EBI-879008  |
| Escherichia coli | association          | intact | EBI-879008  |
| Escherichia coli | association          | intact | EBI-1137637 |
| Escherichia coli | association          | intact | EBI-1137637 |
| Escherichia coli | association          | intact | EBI-1139075 |
| Escherichia coli | association          | intact | EBI-1139075 |
| Escherichia coli | association          | intact | EBI-1139075 |
| Escherichia coli | association          | intact | EBI-1139075 |
| Escherichia coli | association          | intact | EBI-1139075 |
| Escherichia coli | association          | intact | EBI-1139075 |
| Escherichia coli | association          | intact | EBI-1139075 |
| Escherichia coli | association          | intact | EBI-1139075 |
| Escherichia coli | association          | intact | EBI-1139075 |
| Escherichia coli | association          | intact | EBI-1139067 |
| Escherichia coli | association          | intact | EBI-1139067 |
| Escherichia coli | association          | intact | EBI-1139067 |

|                  |             |        |             |
|------------------|-------------|--------|-------------|
| Escherichia coli | association | intact | EBI-1139067 |
| Escherichia coli | association | intact | EBI-1139067 |
| Escherichia coli | association | intact | EBI-1139067 |
| Escherichia coli | association | intact | EBI-1145123 |
| Escherichia coli | association | intact | EBI-1145123 |
| Escherichia coli | association | intact | EBI-1136026 |
| Escherichia coli | association | intact | EBI-1136026 |
| Escherichia coli | association | intact | EBI-1137840 |
| Escherichia coli | association | intact | EBI-1137840 |
| Escherichia coli | association | intact | EBI-1137840 |
| Escherichia coli | association | intact | EBI-1137840 |
| Escherichia coli | association | intact | EBI-1137834 |
| Escherichia coli | association | intact | EBI-1137834 |
| Escherichia coli | association | intact | EBI-1137834 |
| Escherichia coli | association | intact | EBI-1137834 |
| Escherichia coli | association | intact | EBI-1138978 |
| Escherichia coli | association | intact | EBI-1138978 |
| Escherichia coli | association | intact | EBI-882483  |
| Escherichia coli | association | intact | EBI-890053  |
| Escherichia coli | association | intact | EBI-1137952 |
| Escherichia coli | association | intact | EBI-1137952 |
| Escherichia coli | association | intact | EBI-882483  |
| Escherichia coli | association | intact | EBI-890053  |
| Escherichia coli | association | intact | EBI-1137952 |
| Escherichia coli | association | intact | EBI-1137952 |
| Escherichia coli | association | intact | EBI-890053  |
| Escherichia coli | association | intact | EBI-890053  |
| Escherichia coli | association | intact | EBI-890053  |
| Escherichia coli | association | intact | EBI-1137952 |
| Escherichia coli | association | intact | EBI-1137952 |
| Escherichia coli | association | intact | EBI-1137960 |
| Escherichia coli | association | intact | EBI-1137960 |

|                  |                      |        |             |
|------------------|----------------------|--------|-------------|
| Escherichia coli | association          | intact | EBI-1138140 |
| Escherichia coli | physical association | intact | EBI-884476  |
| Escherichia coli | association          | intact | EBI-1138140 |
| Escherichia coli | physical association | intact | EBI-2023957 |
| Escherichia coli | physical association | intact | EBI-2012429 |
| Escherichia coli | physical association | intact | EBI-2012449 |
| Escherichia coli | physical association | intact | EBI-2012567 |
| Escherichia coli | physical association | intact | EBI-2012399 |
| Escherichia coli | association          | intact | EBI-1138140 |
| Escherichia coli | physical association | intact | EBI-1141967 |
| Escherichia coli | physical association | intact | EBI-1147706 |
| Escherichia coli | association          | intact | EBI-1143661 |
| Escherichia coli | association          | intact | EBI-1143661 |
| Escherichia coli | association          | intact | EBI-1143661 |
| Escherichia coli | association          | intact | EBI-1143661 |
| Escherichia coli | association          | intact | EBI-1143661 |
| Escherichia coli | association          | intact | EBI-1143661 |
| Escherichia coli | association          | intact | EBI-1143661 |
| Escherichia coli | association          | intact | EBI-1143661 |
| Escherichia coli | association          | intact | EBI-1143661 |
| Escherichia coli | association          | intact | EBI-1143661 |
| Escherichia coli | association          | intact | EBI-1143661 |
| Escherichia coli | association          | intact | EBI-1143661 |
| Escherichia coli | association          | intact | EBI-1143661 |
| Escherichia coli | association          | intact | EBI-1143661 |
| Escherichia coli | association          | intact | EBI-1135529 |
| Escherichia coli | physical association | intact | EBI-2369510 |
| Escherichia coli | physical association | intact | EBI-2369974 |
| Escherichia coli | association          | intact | EBI-1135529 |
| Escherichia coli | physical association | intact | EBI-2369425 |
| Escherichia coli | association          | intact | EBI-888239  |
| Escherichia coli | association          | intact | EBI-888239  |
| Escherichia coli | association          | intact | EBI-888239  |
| Escherichia coli | association          | intact | EBI-888239  |
| Escherichia coli | association          | intact | EBI-893751  |
| Escherichia coli | association          | intact | EBI-888239  |
| Escherichia coli | association          | intact | EBI-888239  |
| Escherichia coli | association          | intact | EBI-893751  |
| Escherichia coli | association          | intact | EBI-888239  |
| Escherichia coli | association          | intact | EBI-893751  |
| Escherichia coli | association          | intact | EBI-888239  |

|                  |             |        |            |
|------------------|-------------|--------|------------|
| Escherichia coli | association | intact | EBI-888239 |
| Escherichia coli | association | intact | EBI-893751 |
| Escherichia coli | association | intact | EBI-888239 |
| Escherichia coli | association | intact | EBI-888239 |
| Escherichia coli | association | intact | EBI-893751 |
| Escherichia coli | association | intact | EBI-888239 |
| Escherichia coli | association | intact | EBI-888239 |
| Escherichia coli | association | intact | EBI-888239 |
| Escherichia coli | association | intact | EBI-888239 |
| Escherichia coli | association | intact | EBI-888239 |
| Escherichia coli | association | intact | EBI-888239 |
| Escherichia coli | association | intact | EBI-893751 |
| Escherichia coli | association | intact | EBI-888239 |
| Escherichia coli | association | intact | EBI-888239 |
| Escherichia coli | association | intact | EBI-888239 |
| Escherichia coli | association | intact | EBI-888239 |
| Escherichia coli | association | intact | EBI-893751 |
| Escherichia coli | association | intact | EBI-888239 |
| Escherichia coli | association | intact | EBI-888239 |
| Escherichia coli | association | intact | EBI-888239 |
| Escherichia coli | association | intact | EBI-893751 |
| Escherichia coli | association | intact | EBI-888239 |
| Escherichia coli | association | intact | EBI-888239 |
| Escherichia coli | association | intact | EBI-893751 |
| Escherichia coli | association | intact | EBI-893751 |
| Escherichia coli | association | intact | EBI-893751 |
| Escherichia coli | association | intact | EBI-893751 |

|                  |             |        |             |
|------------------|-------------|--------|-------------|
| Escherichia coli | association | intact | EBI-1141957 |
| Escherichia coli | association | intact | EBI-1141957 |
| Escherichia coli | association | intact | EBI-1141957 |
| Escherichia coli | association | intact | EBI-1141957 |
| Escherichia coli | association | intact | EBI-1141957 |





|                  |                    |        |             |
|------------------|--------------------|--------|-------------|
| Escherichia coli | association        | intact | EBI-1138371 |
| Escherichia coli | association        | intact | EBI-894643  |
| Escherichia coli | association        | intact | EBI-889696  |
| Escherichia coli | association        | intact | EBI-894643  |
| Escherichia coli | association        | intact | EBI-889696  |
| Escherichia coli | direct interaction | intact | EBI-1186995 |
| Escherichia coli | direct interaction | intact | EBI-2213576 |
| Escherichia coli | association        | intact | EBI-1138371 |
| Escherichia coli | association        | intact | EBI-1138371 |
| Escherichia coli | association        | intact | EBI-1138371 |
| Escherichia coli | association        | intact | EBI-1138371 |

|                  |             |        |             |
|------------------|-------------|--------|-------------|
| Escherichia coli | association | intact | EBI-894012  |
| Escherichia coli | association | intact | EBI-888887  |
| Escherichia coli | association | intact | EBI-888887  |
| Escherichia coli | association | intact | EBI-1145112 |
| Escherichia coli | association | intact | EBI-1145112 |
| Escherichia coli | association | intact | EBI-1145112 |
| Escherichia coli | association | intact | EBI-894012  |
| Escherichia coli | association | intact | EBI-888887  |
| Escherichia coli | association | intact | EBI-894012  |
| Escherichia coli | association | intact | EBI-894012  |
| Escherichia coli | association | intact | EBI-894012  |
| Escherichia coli | association | intact | EBI-894012  |
| Escherichia coli | association | intact | EBI-894012  |
| Escherichia coli | association | intact | EBI-894012  |
| Escherichia coli | association | intact | EBI-894012  |
| Escherichia coli | association | intact | EBI-1145112 |
| Escherichia coli | association | intact | EBI-1145112 |
| Escherichia coli | association | intact | EBI-894012  |
| Escherichia coli | association | intact | EBI-894012  |

|                  |                      |        |             |
|------------------|----------------------|--------|-------------|
| Escherichia coli | association          | intact | EBI-1143773 |
| Escherichia coli | physical association | intact | EBI-886447  |
| Escherichia coli | association          | intact | EBI-1143773 |
| Escherichia coli | association          | intact | EBI-1143773 |
| Escherichia coli | physical association | intact | EBI-765077  |

|                  |                      |        |             |
|------------------|----------------------|--------|-------------|
| Escherichia coli | association          | intact | EBI-887727  |
| Escherichia coli | association          | intact | EBI-887727  |
| Escherichia coli | physical association | intact | EBI-1140662 |

|                  |             |        |             |
|------------------|-------------|--------|-------------|
| Escherichia coli | association | intact | EBI-1137661 |
| Escherichia coli | association | intact | EBI-1137661 |
| Escherichia coli | association | intact | EBI-1137661 |
| Escherichia coli | association | intact | EBI-1137661 |
| Escherichia coli | association | intact | EBI-1137661 |

|                  |             |        |             |
|------------------|-------------|--------|-------------|
| Escherichia coli | association | intact | EBI-1145187 |
| Escherichia coli | association | intact | EBI-1145187 |
| Escherichia coli | association | intact | EBI-1145187 |

|                  |                      |        |             |
|------------------|----------------------|--------|-------------|
| Escherichia coli | association          | intact | EBI-880367  |
| Escherichia coli | association          | intact | EBI-880367  |
| Escherichia coli | association          | intact | EBI-880367  |
| Escherichia coli | association          | intact | EBI-880367  |
| Escherichia coli | physical association | intact | EBI-1041511 |
| Escherichia coli | physical association | intact | EBI-1041525 |
| Escherichia coli | physical association | intact | EBI-1041539 |
| Escherichia coli | physical association | intact | EBI-1041553 |
| Escherichia coli | physical association | intact | EBI-1037008 |
| Escherichia coli | physical association | intact | EBI-1038777 |
| Escherichia coli | physical association | intact | EBI-1041511 |
| Escherichia coli | physical association | intact | EBI-1041525 |
| Escherichia coli | physical association | intact | EBI-1041539 |
| Escherichia coli | physical association | intact | EBI-1041553 |
| Escherichia coli | physical association | intact | EBI-1037008 |
| Escherichia coli | physical association | intact | EBI-1038777 |
| Escherichia coli | association          | intact | EBI-880367  |
| Escherichia coli | physical association | intact | EBI-885808  |
| Escherichia coli | association          | intact | EBI-880367  |
| Escherichia coli | association          | intact | EBI-880367  |
| Escherichia coli | physical association | intact | EBI-1139222 |

|                  |                      |        |             |
|------------------|----------------------|--------|-------------|
| Escherichia coli | association          | intact | EBI-880342  |
| Escherichia coli | association          | intact | EBI-885754  |
| Escherichia coli | association          | intact | EBI-1139225 |
| Escherichia coli | physical association | intact | EBI-906696  |
| Escherichia coli | association          | intact | EBI-880342  |
| Escherichia coli | association          | intact | EBI-885754  |
| Escherichia coli | physical association | intact | EBI-906956  |
| Escherichia coli | association          | intact | EBI-1139225 |

|                  |                      |        |             |
|------------------|----------------------|--------|-------------|
| Escherichia coli | association          | intact | EBI-880352  |
| Escherichia coli | physical association | intact | EBI-1139229 |
| Escherichia coli | association          | intact | EBI-885776  |
| Escherichia coli | association          | intact | EBI-880352  |
| Escherichia coli | association          | intact | EBI-885776  |
| Escherichia coli | association          | intact | EBI-880352  |
| Escherichia coli | association          | intact | EBI-885776  |
| Escherichia coli | association          | intact | EBI-885776  |
| Escherichia coli | association          | intact | EBI-885776  |
| Escherichia coli | association          | intact | EBI-880352  |
| Escherichia coli | association          | intact | EBI-885776  |
| Escherichia coli | association          | intact | EBI-880352  |
| Escherichia coli | physical association | intact | EBI-1139219 |
| Escherichia coli | association          | intact | EBI-1142149 |
| Escherichia coli | association          | intact | EBI-1142149 |
| Escherichia coli | physical association | intact | EBI-1138188 |
| Escherichia coli | association          | intact | EBI-1145830 |
| Escherichia coli | association          | intact | EBI-1145830 |
| Escherichia coli | association          | intact | EBI-1145830 |
| Escherichia coli | association          | intact | EBI-1145830 |
| Escherichia coli | association          | intact | EBI-1145830 |
| Escherichia coli | association          | intact | EBI-1145830 |
| Escherichia coli | association          | intact | EBI-1145830 |
| Escherichia coli | association          | intact | EBI-1145830 |
| Escherichia coli | association          | intact | EBI-1145830 |
| Escherichia coli | association          | intact | EBI-1145830 |
| Escherichia coli | physical association | intact | EBI-1135324 |
| Escherichia coli | physical association | intact | EBI-2369682 |
| Escherichia coli | physical association | intact | EBI-2369659 |
| Escherichia coli | physical association | intact | EBI-2369645 |
| Escherichia coli | physical association | intact | EBI-2369679 |
| Escherichia coli | physical association | intact | EBI-2369641 |
| Escherichia coli | physical association | intact | EBI-2369596 |
| Escherichia coli | physical association | intact | EBI-2369648 |

|                  |                      |        |             |
|------------------|----------------------|--------|-------------|
| Escherichia coli | physical association | intact | EBI-1147636 |
| Escherichia coli | physical association | intact | EBI-2012351 |
| Escherichia coli | association          | intact | EBI-1141105 |
| Escherichia coli | association          | intact | EBI-893969  |
| Escherichia coli | association          | intact | EBI-893969  |
| Escherichia coli | association          | intact | EBI-1141105 |
| Escherichia coli | association          | intact | EBI-893969  |
| Escherichia coli | association          | intact | EBI-1141105 |
| Escherichia coli | association          | intact | EBI-1141105 |
| Escherichia coli | association          | intact | EBI-1142937 |
| Escherichia coli | association          | intact | EBI-1142937 |
| Escherichia coli | association          | intact | EBI-1142937 |
| Escherichia coli | association          | intact | EBI-1142937 |
| Escherichia coli | association          | intact | EBI-1142937 |
| Escherichia coli | association          | intact | EBI-1142937 |
| Escherichia coli | association          | intact | EBI-1142937 |
| Escherichia coli | physical association | intact | EBI-906816  |
| Escherichia coli | physical association | intact | EBI-1213235 |
| Escherichia coli | association          | intact | EBI-1142426 |
| Escherichia coli | association          | intact | EBI-1142426 |
| Escherichia coli | association          | intact | EBI-1142426 |
| Escherichia coli | association          | intact | EBI-1142426 |
| Escherichia coli | association          | intact | EBI-1142426 |
| Escherichia coli | association          | intact | EBI-1145014 |
| Escherichia coli | association          | intact | EBI-1145014 |
| Escherichia coli | association          | intact | EBI-886823  |
| Escherichia coli | association          | intact | EBI-1145014 |
| Escherichia coli | association          | intact | EBI-893117  |
| Escherichia coli | association          | intact | EBI-886823  |
| Escherichia coli | association          | intact | EBI-1145014 |

|                  |             |        |             |
|------------------|-------------|--------|-------------|
| Escherichia coli | association | intact | EBI-893117  |
| Escherichia coli | association | intact | EBI-893117  |
| Escherichia coli | association | intact | EBI-886823  |
| Escherichia coli | association | intact | EBI-893117  |
| Escherichia coli | association | intact | EBI-1145014 |
| Escherichia coli | association | intact | EBI-886823  |
| Escherichia coli | association | intact | EBI-886823  |
| Escherichia coli | association | intact | EBI-1145014 |
| Escherichia coli | association | intact | EBI-1145014 |
| Escherichia coli | association | intact | EBI-893117  |
| Escherichia coli | association | intact | EBI-1145014 |
| Escherichia coli | association | intact | EBI-886823  |
| Escherichia coli | association | intact | EBI-1145014 |
| Escherichia coli | association | intact | EBI-893117  |
| Escherichia coli | association | intact | EBI-886823  |
| Escherichia coli | association | intact | EBI-893117  |
| Escherichia coli | association | intact | EBI-886823  |
| Escherichia coli | association | intact | EBI-886823  |
| Escherichia coli | association | intact | EBI-1145014 |
| Escherichia coli | association | intact | EBI-1145014 |
| Escherichia coli | association | intact | EBI-886823  |
| Escherichia coli | association | intact | EBI-893117  |
| Escherichia coli | association | intact | EBI-886823  |
| Escherichia coli | association | intact | EBI-893117  |
| Escherichia coli | association | intact | EBI-886823  |
| Escherichia coli | association | intact | EBI-1145014 |
| Escherichia coli | association | intact | EBI-886823  |
| Escherichia coli | association | intact | EBI-1145014 |
| Escherichia coli | association | intact | EBI-893117  |
| Escherichia coli | association | intact | EBI-886823  |
| Escherichia coli | association | intact | EBI-1145014 |
| Escherichia coli | association | intact | EBI-893117  |
| Escherichia coli | association | intact | EBI-893117  |
| Escherichia coli | association | intact | EBI-1145014 |
| Escherichia coli | association | intact | EBI-1136512 |

|                  |                      |        |             |
|------------------|----------------------|--------|-------------|
| Escherichia coli | association          | intact | EBI-1136512 |
| Escherichia coli | association          | intact | EBI-1136512 |
| Escherichia coli | association          | intact | EBI-886789  |
| Escherichia coli | association          | intact | EBI-886789  |
| Escherichia coli | association          | intact | EBI-886789  |
| Escherichia coli | association          | intact | EBI-1136512 |
| Escherichia coli | association          | intact | EBI-886789  |
| Escherichia coli | association          | intact | EBI-886789  |
| Escherichia coli | association          | intact | EBI-886789  |
| Escherichia coli | association          | intact | EBI-1136512 |
| Escherichia coli | association          | intact | EBI-1136512 |
| Escherichia coli | association          | intact | EBI-1136512 |
| Escherichia coli | association          | intact | EBI-880717  |
| Escherichia coli | association          | intact | EBI-886788  |
| Escherichia coli | association          | intact | EBI-880717  |
| Escherichia coli | association          | intact | EBI-880717  |
| Escherichia coli | association          | intact | EBI-1137802 |
| Escherichia coli | association          | intact | EBI-880739  |
| Escherichia coli | association          | intact | EBI-880739  |
| Escherichia coli | association          | intact | EBI-1137807 |
| Escherichia coli | association          | intact | EBI-1137807 |
| Escherichia coli | association          | intact | EBI-1137807 |
| Escherichia coli | association          | intact | EBI-1137807 |
| Escherichia coli | association          | intact | EBI-1137807 |
| Escherichia coli | association          | intact | EBI-1137807 |
| Escherichia coli | physical association | intact | EBI-886840  |
| Escherichia coli | association          | intact | EBI-1137807 |
| Escherichia coli | association          | intact | EBI-1137807 |
| Escherichia coli | physical association | intact | EBI-889144  |
| Escherichia coli | association          | intact | EBI-1135600 |
| Escherichia coli | association          | intact | EBI-1135600 |
| Escherichia coli | association          | intact | EBI-1135600 |
| Escherichia coli | physical association | intact | EBI-1214191 |
| Escherichia coli | physical association | intact | EBI-2463599 |
| Escherichia coli | association          | intact | EBI-1145810 |
| Escherichia coli | physical association | intact | EBI-2116569 |

|                  |             |        |             |
|------------------|-------------|--------|-------------|
| Escherichia coli | association | intact | EBI-1145810 |
| Escherichia coli | association | intact | EBI-1145810 |

|                  |             |        |             |
|------------------|-------------|--------|-------------|
| Escherichia coli | association | intact | EBI-1146030 |
| Escherichia coli | association | intact | EBI-1146030 |

|                  |             |        |             |
|------------------|-------------|--------|-------------|
| Escherichia coli | association | intact | EBI-1138688 |
| Escherichia coli | association | intact | EBI-1138688 |
| Escherichia coli | association | intact | EBI-1138688 |
| Escherichia coli | association | intact | EBI-1138688 |

|                  |             |        |             |
|------------------|-------------|--------|-------------|
| Escherichia coli | association | intact | EBI-1139950 |
| Escherichia coli | association | intact | EBI-1139950 |
| Escherichia coli | association | intact | EBI-1139950 |
| Escherichia coli | association | intact | EBI-1139950 |
| Escherichia coli | association | intact | EBI-1139950 |
| Escherichia coli | association | intact | EBI-1139950 |
| Escherichia coli | association | intact | EBI-1139950 |
| Escherichia coli | association | intact | EBI-1139950 |
| Escherichia coli | association | intact | EBI-1139950 |

|                  |             |        |             |
|------------------|-------------|--------|-------------|
| Escherichia coli | association | intact | EBI-1141994 |
| Escherichia coli | association | intact | EBI-1141994 |

|                  |             |        |             |
|------------------|-------------|--------|-------------|
| Escherichia coli | association | intact | EBI-1135683 |
| Escherichia coli | association | intact | EBI-1135683 |
| Escherichia coli | association | intact | EBI-880983  |
| Escherichia coli | association | intact | EBI-880983  |
| Escherichia coli | association | intact | EBI-887604  |
| Escherichia coli | association | intact | EBI-1135683 |
| Escherichia coli | association | intact | EBI-887604  |
| Escherichia coli | association | intact | EBI-880983  |

|                  |             |        |            |
|------------------|-------------|--------|------------|
| Escherichia coli | association | intact | EBI-883350 |
| Escherichia coli | association | intact | EBI-883350 |



|                  |             |        |             |
|------------------|-------------|--------|-------------|
| Escherichia coli | association | intact | EBI-883350  |
| Escherichia coli | association | intact | EBI-890645  |
| Escherichia coli | association | intact | EBI-883350  |
| Escherichia coli | association | intact | EBI-1144556 |
| Escherichia coli | association | intact | EBI-890645  |
| Escherichia coli | association | intact | EBI-1144556 |
| Escherichia coli | association | intact | EBI-890645  |
| Escherichia coli | association | intact | EBI-1144556 |
| Escherichia coli | association | intact | EBI-890645  |
| Escherichia coli | association | intact | EBI-890645  |
| Escherichia coli | association | intact | EBI-890645  |
| Escherichia coli | association | intact | EBI-890645  |
| Escherichia coli | association | intact | EBI-890645  |
| Escherichia coli | association | intact | EBI-890645  |
| Escherichia coli | association | intact | EBI-883350  |
| Escherichia coli | association | intact | EBI-890645  |
| Escherichia coli | association | intact | EBI-1144556 |

|                  |                      |        |             |
|------------------|----------------------|--------|-------------|
| Escherichia coli | association          | intact | EBI-2504669 |
| Escherichia coli | association          | intact | EBI-2504669 |
| Escherichia coli | direct interaction   | intact | EBI-2504721 |
| Escherichia coli | physical association | intact | EBI-2504740 |
| Escherichia coli | physical association | intact | EBI-2504762 |
| Escherichia coli | association          | intact | EBI-2504669 |
| Escherichia coli | association          | intact | EBI-2504669 |
| Escherichia coli | association          | intact | EBI-2504669 |

|                  |             |        |             |
|------------------|-------------|--------|-------------|
| Escherichia coli | association | intact | EBI-1145805 |
| Escherichia coli | association | intact | EBI-1145805 |
| Escherichia coli | association | intact | EBI-1145805 |

|                  |             |        |             |
|------------------|-------------|--------|-------------|
| Escherichia coli | association | intact | EBI-1135589 |
| Escherichia coli | association | intact | EBI-1135589 |
| Escherichia coli | association | intact | EBI-1135589 |
| Escherichia coli | association | intact | EBI-1135589 |
| Escherichia coli | association | intact | EBI-1135589 |
| Escherichia coli | association | intact | EBI-1135589 |

|                  |             |        |             |
|------------------|-------------|--------|-------------|
| Escherichia coli | association | intact | EBI-1142759 |
| Escherichia coli | association | intact | EBI-1142759 |

|                  |                      |        |             |
|------------------|----------------------|--------|-------------|
| Escherichia coli | association          | intact | EBI-1140332 |
| Escherichia coli | association          | intact | EBI-1140332 |
| Escherichia coli | association          | intact | EBI-887087  |
| Escherichia coli | physical association | intact | EBI-1143110 |
| Escherichia coli | association          | intact | EBI-887087  |
| Escherichia coli | association          | intact | EBI-893231  |
| Escherichia coli | association          | intact | EBI-887128  |
| Escherichia coli | association          | intact | EBI-887128  |
| Escherichia coli | association          | intact | EBI-1135989 |
| Escherichia coli | association          | intact | EBI-893231  |
| Escherichia coli | physical association | intact | EBI-1771048 |
| Escherichia coli | association          | intact | EBI-1135989 |
| Escherichia coli | association          | intact | EBI-1146793 |
| Escherichia coli | association          | intact | EBI-1146793 |
| Escherichia coli | association          | intact | EBI-887434  |
| Escherichia coli | association          | intact | EBI-887434  |
| Escherichia coli | association          | intact | EBI-887434  |
| Escherichia coli | association          | intact | EBI-1138943 |
| Escherichia coli | association          | intact | EBI-1138943 |
| Escherichia coli | association          | intact | EBI-1138943 |
| Escherichia coli | association          | intact | EBI-893272  |
| Escherichia coli | association          | intact | EBI-893272  |
| Escherichia coli | association          | intact | EBI-887434  |
| Escherichia coli | association          | intact | EBI-1138943 |
| Escherichia coli | association          | intact | EBI-893272  |
| Escherichia coli | association          | intact | EBI-1138943 |
| Escherichia coli | association          | intact | EBI-1138943 |
| Escherichia coli | association          | intact | EBI-887434  |
| Escherichia coli | association          | intact | EBI-887434  |
| Escherichia coli | association          | intact | EBI-1138943 |
| Escherichia coli | association          | intact | EBI-893272  |
| Escherichia coli | association          | intact | EBI-1138307 |
| Escherichia coli | association          | intact | EBI-1138307 |
| Escherichia coli | association          | intact | EBI-1138311 |
| Escherichia coli | association          | intact | EBI-1138311 |
| Escherichia coli | association          | intact | EBI-890164  |
| Escherichia coli | association          | intact | EBI-882596  |
| Escherichia coli | association          | intact | EBI-890164  |
| Escherichia coli | association          | intact | EBI-890164  |

|                     |                      |        |             |
|---------------------|----------------------|--------|-------------|
| Escherichia coli    | association          | intact | EBI-1138311 |
| Escherichia coli    | association          | intact | EBI-1138311 |
| Escherichia coli O6 | physical association | intact | EBI-1770978 |
| Escherichia coli    | association          | intact | EBI-882596  |
| Escherichia coli    | association          | intact | EBI-1138311 |
| Escherichia coli    | association          | intact | EBI-1138311 |
| Escherichia coli    | association          | intact | EBI-890008  |
| Escherichia coli    | association          | intact | EBI-890008  |
| Escherichia coli    | association          | intact | EBI-890008  |
| Escherichia coli    | association          | intact | EBI-890008  |
| Escherichia coli    | association          | intact | EBI-890008  |
| Escherichia coli    | association          | intact | EBI-890008  |
| Escherichia coli    | association          | intact | EBI-890008  |
| Escherichia coli    | association          | intact | EBI-890008  |
| Escherichia coli    | association          | intact | EBI-890008  |
| Escherichia coli    | physical association | intact | EBI-1137708 |
| Escherichia coli    | physical association | intact | EBI-1147461 |
| Escherichia coli    | association          | intact | EBI-1137631 |
| Escherichia coli    | association          | intact | EBI-1137631 |
| Escherichia coli    | association          | intact | EBI-893285  |
| Escherichia coli    | association          | intact | EBI-887500  |
| Escherichia coli    | association          | intact | EBI-893285  |
| Escherichia coli    | association          | intact | EBI-887500  |
| Escherichia coli    | association          | intact | EBI-887500  |
| Escherichia coli    | association          | intact | EBI-1137631 |
| Escherichia coli    | association          | intact | EBI-1137631 |
| Escherichia coli    | association          | intact | EBI-887500  |
| Escherichia coli    | association          | intact | EBI-887500  |
| Escherichia coli    | association          | intact | EBI-893285  |
| Escherichia coli    | association          | intact | EBI-887500  |
| Escherichia coli    | association          | intact | EBI-887500  |
| Escherichia coli    | association          | intact | EBI-887500  |
| Escherichia coli    | association          | intact | EBI-893285  |
| Escherichia coli    | association          | intact | EBI-887500  |
| Escherichia coli    | association          | intact | EBI-887500  |
| Escherichia coli    | association          | intact | EBI-893285  |
| Escherichia coli    | association          | intact | EBI-887500  |





|                  |                      |        |             |
|------------------|----------------------|--------|-------------|
| Escherichia coli | association          | intact | EBI-883913  |
| Escherichia coli | association          | intact | EBI-883913  |
| Escherichia coli | association          | intact | EBI-883913  |
| Escherichia coli | association          | intact | EBI-891089  |
| Escherichia coli | association          | intact | EBI-883913  |
| Escherichia coli | association          | intact | EBI-891089  |
| Escherichia coli | association          | intact | EBI-883913  |
| Escherichia coli | association          | intact | EBI-891089  |
| Escherichia coli | association          | intact | EBI-891089  |
| Escherichia coli | association          | intact | EBI-883913  |
| Escherichia coli | association          | intact | EBI-891089  |
| Escherichia coli | association          | intact | EBI-891089  |
| Escherichia coli | association          | intact | EBI-883913  |
| Escherichia coli | association          | intact | EBI-891089  |
| Escherichia coli | association          | intact | EBI-891089  |
| Escherichia coli | association          | intact | EBI-891089  |
| Escherichia coli | association          | intact | EBI-883913  |
| Escherichia coli | association          | intact | EBI-883913  |
| Escherichia coli | association          | intact | EBI-883913  |
| Escherichia coli | association          | intact | EBI-891089  |
| Escherichia coli | association          | intact | EBI-883913  |
| Escherichia coli | physical association | intact | EBI-1169701 |
| Escherichia coli | association          | intact | EBI-883913  |
| Escherichia coli | association          | intact | EBI-891089  |
| Escherichia coli | association          | intact | EBI-883913  |
| Escherichia coli | association          | intact | EBI-891089  |
| Escherichia coli | association          | intact | EBI-891089  |
| Escherichia coli | association          | intact | EBI-891089  |
| Escherichia coli | association          | intact | EBI-883913  |
| Escherichia coli | association          | intact | EBI-883913  |
| Escherichia coli | association          | intact | EBI-891089  |
| Escherichia coli | association          | intact | EBI-883913  |
| Escherichia coli | association          | intact | EBI-891089  |
| Escherichia coli | association          | intact | EBI-883913  |
| Escherichia coli | association          | intact | EBI-883913  |



|                  |                      |        |             |
|------------------|----------------------|--------|-------------|
| Escherichia coli | association          | intact | EBI-1136278 |
| Escherichia coli | association          | intact | EBI-1139523 |
| Escherichia coli | association          | intact | EBI-1139523 |
| Escherichia coli | association          | intact | EBI-887767  |
| Escherichia coli | association          | intact | EBI-893445  |
| Escherichia coli | association          | intact | EBI-1143395 |
| Escherichia coli | association          | intact | EBI-1143395 |
| Escherichia coli | association          | intact | EBI-1143395 |
| Escherichia coli | association          | intact | EBI-1143395 |
| Escherichia coli | association          | intact | EBI-893445  |
| Escherichia coli | association          | intact | EBI-893445  |
| Escherichia coli | association          | intact | EBI-887767  |
| Escherichia coli | association          | intact | EBI-893445  |
| Escherichia coli | association          | intact | EBI-887767  |
| Escherichia coli | association          | intact | EBI-887767  |
| Escherichia coli | association          | intact | EBI-1143395 |
| Escherichia coli | association          | intact | EBI-893445  |
| Escherichia coli | association          | intact | EBI-887767  |
| Escherichia coli | association          | intact | EBI-893445  |
| Escherichia coli | association          | intact | EBI-887767  |
| Escherichia coli | association          | intact | EBI-887767  |
| Escherichia coli | association          | intact | EBI-1143395 |
| Escherichia coli | association          | intact | EBI-893445  |
| Escherichia coli | association          | intact | EBI-893445  |
| Escherichia coli | association          | intact | EBI-887767  |
| Escherichia coli | association          | intact | EBI-1143395 |
| Escherichia coli | association          | intact | EBI-1142752 |
| Escherichia coli | association          | intact | EBI-1142752 |
| Escherichia coli | association          | intact | EBI-1142752 |
| Escherichia coli | association          | intact | EBI-1142752 |
| Escherichia coli | association          | intact | EBI-1142752 |
| Escherichia coli | association          | intact | EBI-1142480 |
| Escherichia coli | physical association | intact | EBI-881405  |
| Escherichia coli | association          | intact | EBI-878661  |
| Escherichia coli | association          | intact | EBI-878661  |
| Escherichia coli | physical association | intact | EBI-906842  |
| Escherichia coli | association          | intact | EBI-1142480 |
| Escherichia coli | association          | intact | EBI-1142480 |
| Escherichia coli | association          | intact | EBI-1142480 |
| Escherichia coli | association          | intact | EBI-1142480 |
| Escherichia coli | association          | intact | EBI-1142480 |



|                  |                      |        |             |
|------------------|----------------------|--------|-------------|
| Escherichia coli | association          | intact | EBI-1142480 |
| Escherichia coli | association          | intact | EBI-1142480 |
| Escherichia coli | association          | intact | EBI-1142480 |
| Escherichia coli | association          | intact | EBI-1142480 |
| Escherichia coli | association          | intact | EBI-1142480 |
| Escherichia coli | association          | intact | EBI-1142480 |
| Escherichia coli | direct interaction   | intact | EBI-903826  |
| Escherichia coli | direct interaction   | intact | EBI-903339  |
| Escherichia coli | association          | intact | EBI-1143708 |
| Escherichia coli | association          | intact | EBI-1143708 |
| Escherichia coli | association          | intact | EBI-1143708 |
| Escherichia coli | direct interaction   | intact | EBI-902902  |
| Escherichia coli | association          | intact | EBI-880387  |
| Escherichia coli | association          | intact | EBI-880387  |
| Escherichia coli | association          | intact | EBI-880387  |
| Escherichia coli | association          | intact | EBI-1140922 |
| Escherichia coli | association          | intact | EBI-1140922 |
| Escherichia coli | physical association | intact | EBI-906771  |
| Escherichia coli | physical association | intact | EBI-906771  |
| Escherichia coli | association          | intact | EBI-1140922 |
| Escherichia coli | association          | intact | EBI-892376  |
| Escherichia coli | association          | intact | EBI-892376  |
| Escherichia coli | association          | intact | EBI-1140922 |
| Escherichia coli | physical association | intact | EBI-1145157 |
| Escherichia coli | association          | intact | EBI-885650  |
| Escherichia coli | association          | intact | EBI-880319  |
| Escherichia coli | association          | intact | EBI-885650  |
| Escherichia coli | association          | intact | EBI-885650  |
| Escherichia coli | association          | intact | EBI-885650  |
| Escherichia coli | association          | intact | EBI-885650  |

|                  |                      |        |             |
|------------------|----------------------|--------|-------------|
| Escherichia coli | association          | intact | EBI-880319  |
| Escherichia coli | association          | intact | EBI-885650  |
| Escherichia coli | association          | intact | EBI-885650  |
| Escherichia coli | physical association | intact | EBI-1147633 |
| Escherichia coli | association          | intact | EBI-1138642 |
| Escherichia coli | association          | intact | EBI-1138642 |
| Escherichia coli | association          | intact | EBI-1138642 |
| Escherichia coli | association          | intact | EBI-1138642 |
| Escherichia coli | association          | intact | EBI-1138642 |
| Escherichia coli | association          | intact | EBI-1138642 |
| Escherichia coli | physical association | intact | EBI-1145664 |
| Escherichia coli | association          | intact | EBI-1143918 |
| Escherichia coli | association          | intact | EBI-1143918 |
| Escherichia coli | association          | intact | EBI-1143918 |
| Escherichia coli | association          | intact | EBI-1143918 |
| Escherichia coli | association          | intact | EBI-1143918 |
| Escherichia coli | association          | intact | EBI-1143918 |
| Escherichia coli | physical association | intact | EBI-884439  |
| Escherichia coli | association          | intact | EBI-1147338 |
| Escherichia coli | association          | intact | EBI-892291  |
| Escherichia coli | association          | intact | EBI-1136708 |
| Escherichia coli | association          | intact | EBI-892291  |
| Escherichia coli | association          | intact | EBI-1136708 |
| Escherichia coli | association          | intact | EBI-892291  |
| Escherichia coli | physical association | intact | EBI-885625  |
| Escherichia coli | association          | intact | EBI-1136708 |
| Escherichia coli | association          | intact | EBI-892291  |
| Escherichia coli | association          | intact | EBI-1136708 |
| Escherichia coli | association          | intact | EBI-1136708 |
| Escherichia coli | association          | intact | EBI-892291  |
| Escherichia coli | association          | intact | EBI-1136708 |
| Escherichia coli | association          | intact | EBI-892291  |
| Escherichia coli | association          | intact | EBI-892291  |
| Escherichia coli | association          | intact | EBI-1136708 |
| Escherichia coli | association          | intact | EBI-892291  |

|                  |                      |        |             |
|------------------|----------------------|--------|-------------|
| Escherichia coli | association          | intact | EBI-893152  |
| Escherichia coli | association          | intact | EBI-886894  |
| Escherichia coli | association          | intact | EBI-886894  |
| Escherichia coli | association          | intact | EBI-886894  |
| Escherichia coli | association          | intact | EBI-886894  |
| Escherichia coli | association          | intact | EBI-893152  |
| Escherichia coli | association          | intact | EBI-886894  |
| Escherichia coli | association          | intact | EBI-886894  |
| Escherichia coli | association          | intact | EBI-886894  |
| Escherichia coli | association          | intact | EBI-893152  |
| Escherichia coli | physical association | intact | EBI-1144993 |
|                  |                      |        |             |
| Escherichia coli | association          | intact | EBI-1146638 |
| Escherichia coli | association          | intact | EBI-1146638 |
| Escherichia coli | association          | intact | EBI-1146638 |
| Escherichia coli | association          | intact | EBI-1146638 |
| Escherichia coli | association          | intact | EBI-1146638 |
|                  |                      |        |             |
| Escherichia coli | physical association | intact | EBI-1146645 |
|                  |                      |        |             |
| Escherichia coli | association          | intact | EBI-882754  |
| Escherichia coli | association          | intact | EBI-882754  |
| Escherichia coli | association          | intact | EBI-882754  |
| Escherichia coli | association          | intact | EBI-879136  |
| Escherichia coli | association          | intact | EBI-882754  |
| Escherichia coli | association          | intact | EBI-879136  |
| Escherichia coli | association          | intact | EBI-882754  |
| Escherichia coli | association          | intact | EBI-882754  |
| Escherichia coli | association          | intact | EBI-882754  |
| Escherichia coli | association          | intact | EBI-879136  |
| Escherichia coli | association          | intact | EBI-882754  |
| Escherichia coli | association          | intact | EBI-882754  |
| Escherichia coli | association          | intact | EBI-882754  |
| Escherichia coli | association          | intact | EBI-879136  |
| Escherichia coli | association          | intact | EBI-882754  |
| Escherichia coli | association          | intact | EBI-882754  |
| Escherichia coli | association          | intact | EBI-882754  |
| Escherichia coli | association          | intact | EBI-879136  |
| Escherichia coli | association          | intact | EBI-882754  |

|                  |                      |        |             |
|------------------|----------------------|--------|-------------|
| Escherichia coli | association          | intact | EBI-882754  |
| Escherichia coli | association          | intact | EBI-882754  |
| Escherichia coli | association          | intact | EBI-879136  |
| Escherichia coli | association          | intact | EBI-879136  |
| Escherichia coli | association          | intact | EBI-882754  |
| Escherichia coli | association          | intact | EBI-879136  |
| Escherichia coli | association          | intact | EBI-879136  |
| Escherichia coli | association          | intact | EBI-882754  |
| Escherichia coli | association          | intact | EBI-882754  |
| Escherichia coli | association          | intact | EBI-882754  |
| Escherichia coli | physical association | intact | EBI-1142206 |
| Escherichia coli | association          | intact | EBI-882754  |
| Escherichia coli | association          | intact | EBI-882754  |
|                  |                      |        |             |
| Escherichia coli | association          | intact | EBI-1144430 |
| Escherichia coli | association          | intact | EBI-1144430 |
| Escherichia coli | association          | intact | EBI-1144430 |
|                  |                      |        |             |
| Escherichia coli | physical association | intact | EBI-1136445 |
|                  |                      |        |             |
| Escherichia coli | association          | intact | EBI-1143694 |
| Escherichia coli | association          | intact | EBI-1143694 |
| Escherichia coli | association          | intact | EBI-1143694 |
| Escherichia coli | association          | intact | EBI-1143694 |
| Escherichia coli | association          | intact | EBI-1143694 |
|                  |                      |        |             |
| Escherichia coli | association          | intact | EBI-1143946 |
| Escherichia coli | association          | intact | EBI-1143946 |
| Escherichia coli | association          | intact | EBI-1143946 |
| Escherichia coli | association          | intact | EBI-1143946 |
| Escherichia coli | association          | intact | EBI-1143946 |
| Escherichia coli | association          | intact | EBI-1143946 |
| Escherichia coli | association          | intact | EBI-1143946 |
| Escherichia coli | association          | intact | EBI-1143946 |
| Escherichia coli | association          | intact | EBI-1143946 |
| Escherichia coli | association          | intact | EBI-1143946 |
| Escherichia coli | association          | intact | EBI-1143946 |
| Escherichia coli | association          | intact | EBI-1143946 |
| Escherichia coli | association          | intact | EBI-1143946 |
| Escherichia coli | association          | intact | EBI-1143946 |
|                  |                      |        |             |
| Escherichia coli | association          | intact | EBI-889160  |







|                  |                      |        |             |
|------------------|----------------------|--------|-------------|
| Escherichia coli | association          | intact | EBI-1138150 |
| Escherichia coli | association          | intact | EBI-1138150 |
| Escherichia coli | association          | intact | EBI-881698  |
| Escherichia coli | association          | intact | EBI-881698  |
| Escherichia coli | physical association | intact | EBI-882361  |
| Escherichia coli | association          | intact | EBI-1140409 |
| Escherichia coli | association          | intact | EBI-1140409 |
| Escherichia coli | association          | intact | EBI-1140409 |
| Escherichia coli | association          | intact | EBI-1147174 |
| Escherichia coli | association          | intact | EBI-1147174 |
| Escherichia coli | association          | intact | EBI-1147159 |
| Escherichia coli | association          | intact | EBI-1147159 |
| Escherichia coli | association          | intact | EBI-1147159 |
| Escherichia coli | association          | intact | EBI-1147159 |
| Escherichia coli | association          | intact | EBI-1147159 |
| Escherichia coli | association          | intact | EBI-1147159 |
| Escherichia coli | association          | intact | EBI-1145223 |
| Escherichia coli | association          | intact | EBI-1145223 |
| Escherichia coli | association          | intact | EBI-1145466 |
| Escherichia coli | association          | intact | EBI-1145466 |
| Escherichia coli | association          | intact | EBI-1145404 |
| Escherichia coli | association          | intact | EBI-1145404 |
| Escherichia coli | association          | intact | EBI-1145404 |
| Escherichia coli | association          | intact | EBI-1145404 |
| Escherichia coli | association          | intact | EBI-1145487 |
| Escherichia coli | association          | intact | EBI-1145487 |
| Escherichia coli | association          | intact | EBI-1145487 |
| Escherichia coli | physical association | intact | EBI-1143452 |
| Escherichia coli | association          | intact | EBI-1145550 |



|                  |             |        |             |
|------------------|-------------|--------|-------------|
| Escherichia coli | association | intact | EBI-1145550 |
| Escherichia coli | association | intact | EBI-1145550 |
| Escherichia coli | association | intact | EBI-1145550 |
| Escherichia coli | association | intact | EBI-1145550 |

|                  |             |        |             |
|------------------|-------------|--------|-------------|
| Escherichia coli | association | intact | EBI-1145537 |
| Escherichia coli | association | intact | EBI-1145537 |
| Escherichia coli | association | intact | EBI-1145537 |

|                  |             |        |            |
|------------------|-------------|--------|------------|
| Escherichia coli | association | intact | EBI-881262 |
|------------------|-------------|--------|------------|

|                  |                      |        |             |
|------------------|----------------------|--------|-------------|
| Escherichia coli | physical association | intact | EBI-1145514 |
|------------------|----------------------|--------|-------------|

|                  |                      |        |             |
|------------------|----------------------|--------|-------------|
| Escherichia coli | physical association | intact | EBI-1142143 |
|------------------|----------------------|--------|-------------|

|                  |             |        |             |
|------------------|-------------|--------|-------------|
| Escherichia coli | association | intact | EBI-1145084 |
| Escherichia coli | association | intact | EBI-1145084 |
| Escherichia coli | association | intact | EBI-1145084 |
| Escherichia coli | association | intact | EBI-1145084 |

|                  |             |        |             |
|------------------|-------------|--------|-------------|
| Escherichia coli | association | intact | EBI-1145573 |
| Escherichia coli | association | intact | EBI-1145573 |
| Escherichia coli | association | intact | EBI-1145573 |
| Escherichia coli | association | intact | EBI-1145573 |
| Escherichia coli | association | intact | EBI-1145573 |
| Escherichia coli | association | intact | EBI-1145573 |
| Escherichia coli | association | intact | EBI-1145573 |

|                  |             |        |             |
|------------------|-------------|--------|-------------|
| Escherichia coli | association | intact | EBI-1146370 |
| Escherichia coli | association | intact | EBI-1146370 |
| Escherichia coli | association | intact | EBI-1146370 |
| Escherichia coli | association | intact | EBI-1146370 |



|                  |             |        |             |
|------------------|-------------|--------|-------------|
| Escherichia coli | association | intact | EBI-1138445 |
| Escherichia coli | association | intact | EBI-886140  |
| Escherichia coli | association | intact | EBI-1144013 |
| Escherichia coli | association | intact | EBI-1144013 |
| Escherichia coli | association | intact | EBI-1144013 |
| Escherichia coli | association | intact | EBI-1144013 |
| Escherichia coli | association | intact | EBI-1144013 |
| Escherichia coli | association | intact | EBI-1144013 |
| Escherichia coli | association | intact | EBI-1144013 |
| Escherichia coli | association | intact | EBI-1144013 |
| Escherichia coli | association | intact | EBI-1144013 |
| Escherichia coli | association | intact | EBI-1144013 |
| Escherichia coli | association | intact | EBI-1144013 |
| Escherichia coli | association | intact | EBI-885288  |
| Escherichia coli | association | intact | EBI-1143090 |
| Escherichia coli | association | intact | EBI-885288  |
| Escherichia coli | association | intact | EBI-885288  |
| Escherichia coli | association | intact | EBI-892010  |
| Escherichia coli | association | intact | EBI-892010  |
| Escherichia coli | association | intact | EBI-885288  |
| Escherichia coli | association | intact | EBI-892010  |
| Escherichia coli | association | intact | EBI-885288  |
| Escherichia coli | association | intact | EBI-892010  |
| Escherichia coli | association | intact | EBI-885288  |
| Escherichia coli | association | intact | EBI-885288  |
| Escherichia coli | association | intact | EBI-885288  |
| Escherichia coli | association | intact | EBI-892010  |
| Escherichia coli | association | intact | EBI-885288  |
| Escherichia coli | association | intact | EBI-885288  |
| Escherichia coli | association | intact | EBI-892010  |
| Escherichia coli | association | intact | EBI-885288  |
| Escherichia coli | association | intact | EBI-885288  |
| Escherichia coli | association | intact | EBI-1143090 |
| Escherichia coli | association | intact | EBI-892010  |
| Escherichia coli | association | intact | EBI-892010  |
| Escherichia coli | association | intact | EBI-885288  |
| Escherichia coli | association | intact | EBI-885288  |















|                  |                      |        |             |
|------------------|----------------------|--------|-------------|
| Escherichia coli | physical association | intact | EBI-887248  |
| Escherichia coli | association          | intact | EBI-1141698 |
| Escherichia coli | association          | intact | EBI-1141698 |
| Escherichia coli | association          | intact | EBI-1141698 |
| Escherichia coli | association          | intact | EBI-1139475 |
| Escherichia coli | association          | intact | EBI-1139475 |
| Escherichia coli | association          | intact | EBI-1139475 |
| Escherichia coli | association          | intact | EBI-1139475 |
| Escherichia coli | physical association | intact | EBI-888410  |
| Escherichia coli | association          | intact | EBI-1139475 |
| Escherichia coli | association          | intact | EBI-1139475 |
| Escherichia coli | physical association | intact | EBI-1140870 |
| Escherichia coli | association          | intact | EBI-888473  |
| Escherichia coli | association          | intact | EBI-849240  |
| Escherichia coli | association          | intact | EBI-888473  |
| Escherichia coli | association          | intact | EBI-849240  |
| Escherichia coli | association          | intact | EBI-849332  |
| Escherichia coli | association          | intact | EBI-849357  |
| Escherichia coli | association          | intact | EBI-849381  |
| Escherichia coli | association          | intact | EBI-893488  |
| Escherichia coli | association          | intact | EBI-849044  |
| Escherichia coli | association          | intact | EBI-849432  |
| Escherichia coli | association          | intact | EBI-849240  |
| Escherichia coli | association          | intact | EBI-888473  |
| Escherichia coli | association          | intact | EBI-888473  |
| Escherichia coli | association          | intact | EBI-849240  |
| Escherichia coli | association          | intact | EBI-849332  |
| Escherichia coli | association          | intact | EBI-849357  |
| Escherichia coli | association          | intact | EBI-849381  |
| Escherichia coli | association          | intact | EBI-849407  |
| Escherichia coli | association          | intact | EBI-893488  |
| Escherichia coli | association          | intact | EBI-849432  |
| Escherichia coli | association          | intact | EBI-849464  |
| Escherichia coli | physical association | intact | EBI-1169624 |
| Escherichia coli | association          | intact | EBI-888473  |
| Escherichia coli | association          | intact | EBI-888473  |
| Escherichia coli | association          | intact | EBI-893488  |
| Escherichia coli | association          | intact | EBI-849240  |
| Escherichia coli | association          | intact | EBI-849332  |

|                  |                      |        |            |
|------------------|----------------------|--------|------------|
| Escherichia coli | association          | intact | EBI-849357 |
| Escherichia coli | association          | intact | EBI-849381 |
| Escherichia coli | association          | intact | EBI-849407 |
| Escherichia coli | association          | intact | EBI-849432 |
| Escherichia coli | association          | intact | EBI-849464 |
| Escherichia coli | association          | intact | EBI-849240 |
| Escherichia coli | association          | intact | EBI-849332 |
| Escherichia coli | association          | intact | EBI-849357 |
| Escherichia coli | association          | intact | EBI-849381 |
| Escherichia coli | association          | intact | EBI-849407 |
| Escherichia coli | association          | intact | EBI-849432 |
| Escherichia coli | association          | intact | EBI-849464 |
| Escherichia coli | association          | intact | EBI-849240 |
| Escherichia coli | association          | intact | EBI-849407 |
| Escherichia coli | association          | intact | EBI-849432 |
| Escherichia coli | association          | intact | EBI-888473 |
| Escherichia coli | association          | intact | EBI-849240 |
| Escherichia coli | association          | intact | EBI-849332 |
| Escherichia coli | association          | intact | EBI-849357 |
| Escherichia coli | association          | intact | EBI-849407 |
| Escherichia coli | association          | intact | EBI-893488 |
| Escherichia coli | association          | intact | EBI-849464 |
| Escherichia coli | association          | intact | EBI-888473 |
| Escherichia coli | physical association | intact | EBI-849220 |
| Escherichia coli | association          | intact | EBI-849381 |
| Escherichia coli | association          | intact | EBI-849407 |
| Escherichia coli | association          | intact | EBI-893488 |
| Escherichia coli | association          | intact | EBI-849044 |
| Escherichia coli | association          | intact | EBI-849432 |
| Escherichia coli | association          | intact | EBI-849464 |
| Escherichia coli | association          | intact | EBI-888473 |
| Escherichia coli | association          | intact | EBI-849332 |
| Escherichia coli | association          | intact | EBI-849357 |
| Escherichia coli | association          | intact | EBI-849357 |
| Escherichia coli | association          | intact | EBI-849432 |
| Escherichia coli | association          | intact | EBI-849464 |
| Escherichia coli | association          | intact | EBI-888473 |
| Escherichia coli | association          | intact | EBI-893488 |
| Escherichia coli | association          | intact | EBI-893488 |
| Escherichia coli | association          | intact | EBI-849432 |
| Escherichia coli | association          | intact | EBI-849464 |
| Escherichia coli | association          | intact | EBI-888473 |
| Escherichia coli | association          | intact | EBI-849332 |
| Escherichia coli | association          | intact | EBI-849381 |
| Escherichia coli | association          | intact | EBI-893488 |



|                  |                      |        |             |
|------------------|----------------------|--------|-------------|
| Escherichia coli | association          | intact | EBI-849464  |
| Escherichia coli | association          | intact | EBI-849240  |
| Escherichia coli | association          | intact | EBI-849332  |
| Escherichia coli | association          | intact | EBI-849240  |
| Escherichia coli | association          | intact | EBI-849332  |
| Escherichia coli | association          | intact | EBI-849357  |
| Escherichia coli | association          | intact | EBI-849381  |
| Escherichia coli | association          | intact | EBI-849407  |
| Escherichia coli | association          | intact | EBI-849432  |
| Escherichia coli | association          | intact | EBI-849464  |
| Escherichia coli | association          | intact | EBI-893488  |
| Escherichia coli | association          | intact | EBI-888473  |
| Escherichia coli | association          | intact | EBI-849407  |
| Escherichia coli | association          | intact | EBI-849464  |
|                  |                      |        |             |
| Escherichia coli | association          | intact | EBI-895082  |
| Escherichia coli | association          | intact | EBI-895082  |
| Escherichia coli | association          | intact | EBI-1145286 |
| Escherichia coli | association          | intact | EBI-1145286 |
| Escherichia coli | association          | intact | EBI-1145286 |
| Escherichia coli | association          | intact | EBI-895082  |
| Escherichia coli | association          | intact | EBI-895082  |
| Escherichia coli | association          | intact | EBI-895082  |
| Escherichia coli | association          | intact | EBI-895082  |
| Escherichia coli | association          | intact | EBI-895082  |
| Escherichia coli | association          | intact | EBI-1145286 |
| Escherichia coli | association          | intact | EBI-895082  |
| Escherichia coli | association          | intact | EBI-895082  |
| Escherichia coli | physical association | intact | EBI-890107  |
| Escherichia coli | association          | intact | EBI-895082  |
| Escherichia coli | association          | intact | EBI-895082  |
| Escherichia coli | association          | intact | EBI-1145286 |
|                  |                      |        |             |
| Escherichia coli | association          | intact | EBI-883997  |
| Escherichia coli | association          | intact | EBI-891136  |
| Escherichia coli | association          | intact | EBI-883997  |
| Escherichia coli | association          | intact | EBI-883997  |
| Escherichia coli | association          | intact | EBI-891136  |
| Escherichia coli | association          | intact | EBI-883997  |
| Escherichia coli | association          | intact | EBI-883997  |
| Escherichia coli | association          | intact | EBI-883997  |
| Escherichia coli | association          | intact | EBI-891136  |
| Escherichia coli | association          | intact | EBI-883997  |











|                  |             |        |             |
|------------------|-------------|--------|-------------|
| Escherichia coli | association | intact | EBI-883170  |
| Escherichia coli | association | intact | EBI-883170  |
| Escherichia coli | association | intact | EBI-879304  |
| Escherichia coli | association | intact | EBI-883170  |
| Escherichia coli | association | intact | EBI-883170  |
| Escherichia coli | association | intact | EBI-883170  |
| Escherichia coli | association | intact | EBI-879304  |
| Escherichia coli | association | intact | EBI-879304  |
| Escherichia coli | association | intact | EBI-883170  |
| Escherichia coli | association | intact | EBI-1147184 |
| Escherichia coli | association | intact | EBI-883046  |
| Escherichia coli | association | intact | EBI-883046  |
| Escherichia coli | association | intact | EBI-1147184 |
| Escherichia coli | association | intact | EBI-1147184 |
| Escherichia coli | association | intact | EBI-883046  |
| Escherichia coli | association | intact | EBI-883046  |
| Escherichia coli | association | intact | EBI-1147184 |
| Escherichia coli | association | intact | EBI-879261  |
| Escherichia coli | association | intact | EBI-883046  |
| Escherichia coli | association | intact | EBI-1147184 |
| Escherichia coli | association | intact | EBI-1147184 |
| Escherichia coli | association | intact | EBI-879261  |
| Escherichia coli | association | intact | EBI-879261  |
| Escherichia coli | association | intact | EBI-883046  |
| Escherichia coli | association | intact | EBI-879261  |
| Escherichia coli | association | intact | EBI-1147184 |
| Escherichia coli | association | intact | EBI-879261  |
| Escherichia coli | association | intact | EBI-883046  |
| Escherichia coli | association | intact | EBI-879261  |
| Escherichia coli | association | intact | EBI-883046  |
| Escherichia coli | association | intact | EBI-883046  |
| Escherichia coli | association | intact | EBI-1147184 |
| Escherichia coli | association | intact | EBI-883046  |
| Escherichia coli | association | intact | EBI-883046  |
| Escherichia coli | association | intact | EBI-879261  |
| Escherichia coli | association | intact | EBI-883046  |
| Escherichia coli | association | intact | EBI-879261  |
| Escherichia coli | association | intact | EBI-883046  |

|                  |                      |        |             |
|------------------|----------------------|--------|-------------|
| Escherichia coli | association          | intact | EBI-879261  |
| Escherichia coli | association          | intact | EBI-883046  |
| Escherichia coli | association          | intact | EBI-1147184 |
| Escherichia coli | physical association | intact | EBI-2123305 |
| Escherichia coli | physical association | intact | EBI-2116750 |
| Escherichia coli | association          | intact | EBI-879261  |
| Escherichia coli | association          | intact | EBI-883046  |
| Escherichia coli | association          | intact | EBI-1147184 |
| Escherichia coli | physical association | intact | EBI-1780332 |
| Escherichia coli | association          | intact | EBI-879261  |
| Escherichia coli | association          | intact | EBI-883046  |
| Escherichia coli | physical association | intact | EBI-2123305 |
| Escherichia coli | physical association | intact | EBI-2116750 |
| Escherichia coli | association          | intact | EBI-879261  |
| Escherichia coli | association          | intact | EBI-883046  |
| Escherichia coli | association          | intact | EBI-1147184 |
| Escherichia coli | association          | intact | EBI-883046  |
| Escherichia coli | association          | intact | EBI-879261  |
| Escherichia coli | association          | intact | EBI-883046  |
| Escherichia coli | association          | intact | EBI-883046  |
| Escherichia coli | association          | intact | EBI-879261  |
| Escherichia coli | association          | intact | EBI-883046  |
| Escherichia coli | association          | intact | EBI-879261  |
| Escherichia coli | association          | intact | EBI-883046  |
| Escherichia coli | association          | intact | EBI-879261  |
| Escherichia coli | association          | intact | EBI-883046  |
| Escherichia coli | association          | intact | EBI-1147184 |
| Escherichia coli | association          | intact | EBI-1147184 |
| Escherichia coli | association          | intact | EBI-1147184 |
| Escherichia coli | association          | intact | EBI-883046  |
| Escherichia coli | association          | intact | EBI-883046  |
| Escherichia coli | association          | intact | EBI-883046  |
| Escherichia coli | association          | intact | EBI-883046  |
| Escherichia coli | association          | intact | EBI-886257  |
| Escherichia coli | association          | intact | EBI-1144702 |
| Escherichia coli | association          | intact | EBI-892741  |
| Escherichia coli | association          | intact | EBI-1144702 |
| Escherichia coli | association          | intact | EBI-1144702 |
| Escherichia coli | association          | intact | EBI-886257  |
| Escherichia coli | association          | intact | EBI-892741  |
| Escherichia coli | association          | intact | EBI-1144702 |
| Escherichia coli | association          | intact | EBI-1144702 |
| Escherichia coli | association          | intact | EBI-1144702 |
| Escherichia coli | association          | intact | EBI-886257  |







|                  |                      |        |             |
|------------------|----------------------|--------|-------------|
| Escherichia coli | association          | intact | EBI-1138332 |
| Escherichia coli | association          | intact | EBI-1138332 |
| Escherichia coli | physical association | intact | EBI-2623995 |
| Escherichia coli | physical association | intact | EBI-2623979 |
| Escherichia coli | physical association | intact | EBI-2607987 |
| Escherichia coli | association          | intact | EBI-1145610 |
| Escherichia coli | association          | intact | EBI-1145610 |
| Escherichia coli | association          | intact | EBI-1145610 |
| Escherichia coli | association          | intact | EBI-1145610 |
| Escherichia coli | association          | intact | EBI-1145610 |
| Escherichia coli | association          | intact | EBI-1145459 |
| Escherichia coli | association          | intact | EBI-1145504 |
| Escherichia coli | association          | intact | EBI-1145504 |
| Escherichia coli | association          | intact | EBI-1145504 |
| Escherichia coli | association          | intact | EBI-1145504 |
| Escherichia coli | association          | intact | EBI-1144972 |
| Escherichia coli | association          | intact | EBI-1144972 |
| Escherichia coli | association          | intact | EBI-1144972 |
| Escherichia coli | association          | intact | EBI-1144972 |
| Escherichia coli | association          | intact | EBI-1144972 |
| Escherichia coli | association          | intact | EBI-1144972 |
| Escherichia coli | association          | intact | EBI-1143455 |
| Escherichia coli | association          | intact | EBI-1143455 |
| Escherichia coli | association          | intact | EBI-1143455 |
| Escherichia coli | association          | intact | EBI-1143455 |
| Escherichia coli | association          | intact | EBI-1147674 |
| Escherichia coli | association          | intact | EBI-1147674 |
| Escherichia coli | physical association | intact | EBI-2370547 |
| Escherichia coli | physical association | intact | EBI-2370566 |
| Escherichia coli | physical association | intact | EBI-2370486 |
| Escherichia coli | association          | intact | EBI-1135770 |
| Escherichia coli | association          | intact | EBI-1135770 |

|                  |                      |        |             |
|------------------|----------------------|--------|-------------|
| Escherichia coli | association          | intact | EBI-1135770 |
| Escherichia coli | association          | intact | EBI-1145531 |
| Escherichia coli | association          | intact | EBI-1145434 |
| Escherichia coli | association          | intact | EBI-1145434 |
| Escherichia coli | association          | intact | EBI-1145434 |
| Escherichia coli | association          | intact | EBI-1145434 |
| Escherichia coli | association          | intact | EBI-1145434 |
| Escherichia coli | association          | intact | EBI-1145434 |
| Escherichia coli | association          | intact | EBI-1145434 |
| Escherichia coli | association          | intact | EBI-1145434 |
| Escherichia coli | association          | intact | EBI-1145434 |
| Escherichia coli | association          | intact | EBI-884272  |
| Escherichia coli | association          | intact | EBI-884272  |
| Escherichia coli | association          | intact | EBI-1145472 |
| Escherichia coli | association          | intact | EBI-1145472 |
| Escherichia coli | association          | intact | EBI-1145472 |
| Escherichia coli | association          | intact | EBI-1145472 |
| Escherichia coli | association          | intact | EBI-1145472 |
| Escherichia coli | association          | intact | EBI-1145472 |
| Escherichia coli | association          | intact | EBI-1145472 |
| Escherichia coli | association          | intact | EBI-1147655 |
| Escherichia coli | association          | intact | EBI-1147655 |
| Escherichia coli | association          | intact | EBI-1147655 |
| Escherichia coli | association          | intact | EBI-1147655 |
| Escherichia coli | association          | intact | EBI-1147655 |
| Escherichia coli | association          | intact | EBI-1147655 |
| Escherichia coli | physical association | intact | EBI-2463592 |
| Escherichia coli | association          | intact | EBI-1145499 |
| Escherichia coli | association          | intact | EBI-1145499 |
| Escherichia coli | association          | intact | EBI-1145214 |
| Escherichia coli | association          | intact | EBI-1145214 |
| Escherichia coli | association          | intact | EBI-1145214 |
| Escherichia coli | association          | intact | EBI-1135454 |



|                  |                      |        |             |
|------------------|----------------------|--------|-------------|
| Escherichia coli | association          | intact | EBI-1135454 |
| Escherichia coli | association          | intact | EBI-1135454 |
| Escherichia coli | association          | intact | EBI-1145382 |
| Escherichia coli | association          | intact | EBI-1145382 |
| Escherichia coli | association          | intact | EBI-1145382 |
| Escherichia coli | association          | intact | EBI-1145382 |
| Escherichia coli | association          | intact | EBI-1145382 |
| Escherichia coli | association          | intact | EBI-1145382 |
| Escherichia coli | association          | intact | EBI-1145382 |
| Escherichia coli | association          | intact | EBI-1145382 |
| Escherichia coli | association          | intact | EBI-1145382 |
| Escherichia coli | association          | intact | EBI-1145382 |
| Escherichia coli | association          | intact | EBI-1145382 |
| Escherichia coli | association          | intact | EBI-1147905 |
| Escherichia coli | association          | intact | EBI-1147905 |
| Escherichia coli | association          | intact | EBI-1147905 |
| Escherichia coli | association          | intact | EBI-1147905 |
| Escherichia coli | association          | intact | EBI-1147905 |
| Escherichia coli | association          | intact | EBI-1147905 |
| Escherichia coli | association          | intact | EBI-1147905 |
| Escherichia coli | association          | intact | EBI-1147905 |
| Escherichia coli | association          | intact | EBI-1147905 |
| Escherichia coli | association          | intact | EBI-1147905 |
| Escherichia coli | association          | intact | EBI-1147905 |
| Escherichia coli | physical association | intact | EBI-890983  |
| Escherichia coli | physical association | intact | EBI-883806  |
| Escherichia coli | association          | intact | EBI-1145973 |
| Escherichia coli | association          | intact | EBI-1145973 |
| Escherichia coli | association          | intact | EBI-1145973 |
| Escherichia coli | association          | intact | EBI-1144390 |
| Escherichia coli | association          | intact | EBI-1144390 |
| Escherichia coli | association          | intact | EBI-1144390 |
| Escherichia coli | association          | intact | EBI-1144390 |
| Escherichia coli | physical association | intact | EBI-1135533 |
| Escherichia coli | association          | intact | EBI-894346  |
| Escherichia coli | association          | intact | EBI-894346  |

|                  |                      |        |             |
|------------------|----------------------|--------|-------------|
| Escherichia coli | association          | intact | EBI-894346  |
| Escherichia coli | physical association | intact | EBI-883898  |
| Escherichia coli | association          | intact | EBI-1144905 |
| Escherichia coli | association          | intact | EBI-1144905 |
| Escherichia coli | association          | intact | EBI-1140230 |
| Escherichia coli | association          | intact | EBI-1140230 |
| Escherichia coli | association          | intact | EBI-1140230 |
| Escherichia coli | association          | intact | EBI-1140230 |
| Escherichia coli | association          | intact | EBI-1140230 |
| Escherichia coli | association          | intact | EBI-1140230 |
| Escherichia coli | association          | intact | EBI-1140230 |
| Escherichia coli | association          | intact | EBI-1140230 |
| Escherichia coli | association          | intact | EBI-1140230 |
| Escherichia coli | association          | intact | EBI-1142134 |
| Escherichia coli | association          | intact | EBI-892392  |
| Escherichia coli | physical association | intact | EBI-885843  |
| Escherichia coli | association          | intact | EBI-892392  |
| Escherichia coli | association          | intact | EBI-892392  |
| Escherichia coli | association          | intact | EBI-892392  |
| Escherichia coli | association          | intact | EBI-892392  |
| Escherichia coli | association          | intact | EBI-892392  |
| Escherichia coli | association          | intact | EBI-892392  |
| Escherichia coli | association          | intact | EBI-892392  |
| Escherichia coli | association          | intact | EBI-1142134 |
| Escherichia coli | association          | intact | EBI-1138195 |
| Escherichia coli | association          | intact | EBI-1138195 |
| Escherichia coli | association          | intact | EBI-1138195 |
| Escherichia coli | association          | intact | EBI-1138195 |
| Escherichia coli | association          | intact | EBI-1138195 |
| Escherichia coli | association          | intact | EBI-1138195 |
| Escherichia coli | association          | intact | EBI-1138195 |
| Escherichia coli | association          | intact | EBI-1141081 |
| Escherichia coli | association          | intact | EBI-1141081 |
| Escherichia coli | association          | intact | EBI-1141081 |
| Escherichia coli | association          | intact | EBI-1141081 |
| Escherichia coli | association          | intact | EBI-1141081 |
| Escherichia coli | association          | intact | EBI-1139483 |
| Escherichia coli | association          | intact | EBI-1139483 |

|                  |                      |        |             |
|------------------|----------------------|--------|-------------|
| Escherichia coli | association          | intact | EBI-1140917 |
| Escherichia coli | association          | intact | EBI-1140917 |
| Escherichia coli | association          | intact | EBI-1140917 |
| Escherichia coli | physical association | intact | EBI-1143989 |
| Escherichia coli | association          | intact | EBI-886105  |
| Escherichia coli | association          | intact | EBI-886105  |
| Escherichia coli | association          | intact | EBI-880477  |
| Escherichia coli | association          | intact | EBI-880477  |
| Escherichia coli | association          | intact | EBI-886105  |
| Escherichia coli | association          | intact | EBI-880477  |
| Escherichia coli | association          | intact | EBI-880477  |
| Escherichia coli | association          | intact | EBI-880477  |
| Escherichia coli | association          | intact | EBI-880477  |
| Escherichia coli | association          | intact | EBI-886105  |
| Escherichia coli | association          | intact | EBI-880477  |
| Escherichia coli | association          | intact | EBI-886105  |
| Escherichia coli | association          | intact | EBI-886105  |
| Escherichia coli | association          | intact | EBI-886105  |
| Escherichia coli | association          | intact | EBI-886105  |
| Escherichia coli | association          | intact | EBI-886105  |
| Escherichia coli | association          | intact | EBI-886105  |
| Escherichia coli | association          | intact | EBI-886105  |
| Escherichia coli | physical association | intact | EBI-1213293 |
| Escherichia coli | association          | intact | EBI-880477  |
| Escherichia coli | association          | intact | EBI-886105  |
| Escherichia coli | direct interaction   | intact | EBI-761473  |
| Escherichia coli | association          | intact | EBI-886105  |
| Escherichia coli | association          | intact | EBI-880477  |
| Escherichia coli | physical association | intact | EBI-907365  |
| Escherichia coli | physical association | intact | EBI-907365  |
| Escherichia coli | association          | intact | EBI-886253  |
| Escherichia coli | association          | intact | EBI-880504  |
| Escherichia coli | association          | intact | EBI-886253  |
| Escherichia coli | association          | intact | EBI-1146244 |
| Escherichia coli | association          | intact | EBI-1146244 |
| Escherichia coli | association          | intact | EBI-886253  |
| Escherichia coli | association          | intact | EBI-1146244 |
| Escherichia coli | association          | intact | EBI-880504  |
| Escherichia coli | association          | intact | EBI-1146244 |



|                  |                      |        |             |
|------------------|----------------------|--------|-------------|
| Escherichia coli | association          | intact | EBI-1140712 |
| Escherichia coli | association          | intact | EBI-1140712 |
| Escherichia coli | association          | intact | EBI-1140712 |
| Escherichia coli | association          | intact | EBI-1140712 |
| Escherichia coli | physical association | intact | EBI-1137705 |
| Escherichia coli | physical association | intact | EBI-1147974 |
| Escherichia coli | association          | intact | EBI-1135494 |
| Escherichia coli | association          | intact | EBI-1135494 |
| Escherichia coli | association          | intact | EBI-881988  |
| Escherichia coli | association          | intact | EBI-881988  |
| Escherichia coli | association          | intact | EBI-881988  |
| Escherichia coli | association          | intact | EBI-881988  |
| Escherichia coli | association          | intact | EBI-881988  |
| Escherichia coli | association          | intact | EBI-881988  |
| Escherichia coli | association          | intact | EBI-881988  |
| Escherichia coli | association          | intact | EBI-881988  |
| Escherichia coli | association          | intact | EBI-881988  |
| Escherichia coli | association          | intact | EBI-881988  |
| Escherichia coli | association          | intact | EBI-881988  |
| Escherichia coli | association          | intact | EBI-881988  |
| Escherichia coli | physical association | intact | EBI-1214222 |
| Escherichia coli | association          | intact | EBI-1145639 |
| Escherichia coli | association          | intact | EBI-893588  |
| Escherichia coli | association          | intact | EBI-893588  |
| Escherichia coli | association          | intact | EBI-1145639 |
| Escherichia coli | association          | intact | EBI-893588  |
| Escherichia coli | association          | intact | EBI-893588  |
| Escherichia coli | physical association | intact | EBI-851353  |





|                  |             |        |            |
|------------------|-------------|--------|------------|
| Escherichia coli | association | intact | EBI-880676 |
| Escherichia coli | association | intact | EBI-886668 |
| Escherichia coli | association | intact | EBI-886668 |
| Escherichia coli | association | intact | EBI-880676 |
| Escherichia coli | association | intact | EBI-886668 |
| Escherichia coli | association | intact | EBI-886668 |
| Escherichia coli | association | intact | EBI-886668 |
| Escherichia coli | association | intact | EBI-880676 |
| Escherichia coli | association | intact | EBI-880676 |
| Escherichia coli | association | intact | EBI-880676 |
| Escherichia coli | association | intact | EBI-886668 |

|                  |             |        |             |
|------------------|-------------|--------|-------------|
| Escherichia coli | association | intact | EBI-1143343 |
| Escherichia coli | association | intact | EBI-889906  |
| Escherichia coli | association | intact | EBI-889906  |
| Escherichia coli | association | intact | EBI-889906  |
| Escherichia coli | association | intact | EBI-889906  |
| Escherichia coli | association | intact | EBI-1143343 |
| Escherichia coli | association | intact | EBI-894853  |
| Escherichia coli | association | intact | EBI-889906  |
| Escherichia coli | association | intact | EBI-894853  |
| Escherichia coli | association | intact | EBI-894853  |
| Escherichia coli | association | intact | EBI-889906  |
| Escherichia coli | association | intact | EBI-894853  |
| Escherichia coli | association | intact | EBI-889906  |
| Escherichia coli | association | intact | EBI-894853  |
| Escherichia coli | association | intact | EBI-889906  |
| Escherichia coli | association | intact | EBI-889906  |
| Escherichia coli | association | intact | EBI-889906  |
| Escherichia coli | association | intact | EBI-1143343 |

|                  |             |        |            |
|------------------|-------------|--------|------------|
| Escherichia coli | association | intact | EBI-880876 |
| Escherichia coli | association | intact | EBI-880876 |
| Escherichia coli | association | intact | EBI-880876 |
| Escherichia coli | association | intact | EBI-880876 |

|                  |             |        |             |
|------------------|-------------|--------|-------------|
| Escherichia coli | association | intact | EBI-1147361 |
| Escherichia coli | association | intact | EBI-1147361 |

|                  |             |        |            |
|------------------|-------------|--------|------------|
| Escherichia coli | association | intact | EBI-891549 |
| Escherichia coli | association | intact | EBI-891549 |
| Escherichia coli | association | intact | EBI-891549 |







|                  |                      |        |             |
|------------------|----------------------|--------|-------------|
| Escherichia coli | association          | intact | EBI-891312  |
| Escherichia coli | association          | intact | EBI-1135459 |
| Escherichia coli | association          | intact | EBI-1135459 |
| Escherichia coli | association          | intact | EBI-891312  |
| Escherichia coli | association          | intact | EBI-891312  |
| Escherichia coli | association          | intact | EBI-891312  |
| Escherichia coli | association          | intact | EBI-891312  |
| Escherichia coli | association          | intact | EBI-891312  |
| Escherichia coli | association          | intact | EBI-1143684 |
| Escherichia coli | association          | intact | EBI-883462  |
| Escherichia coli | association          | intact | EBI-883462  |
| Escherichia coli | association          | intact | EBI-883462  |
| Escherichia coli | association          | intact | EBI-1143684 |
| Escherichia coli | association          | intact | EBI-883462  |
| Escherichia coli | association          | intact | EBI-1143684 |
| Escherichia coli | association          | intact | EBI-1137091 |
| Escherichia coli | association          | intact | EBI-1137091 |
| Escherichia coli | association          | intact | EBI-1141111 |
| Escherichia coli | association          | intact | EBI-878680  |
| Escherichia coli | association          | intact | EBI-1141111 |
| Escherichia coli | association          | intact | EBI-1141111 |
| Escherichia coli | association          | intact | EBI-1141111 |
| Escherichia coli | association          | intact | EBI-1141111 |
| Escherichia coli | association          | intact | EBI-1141111 |
| Escherichia coli | association          | intact | EBI-878680  |
| Escherichia coli | association          | intact | EBI-1142723 |
| Escherichia coli | association          | intact | EBI-1142723 |
| Escherichia coli | association          | intact | EBI-1142723 |
| Escherichia coli | association          | intact | EBI-1142723 |
| Escherichia coli | association          | intact | EBI-1142723 |
| Escherichia coli | physical association | intact | EBI-879483  |
| Escherichia coli | association          | intact | EBI-894357  |
| Escherichia coli | association          | intact | EBI-894357  |
| Escherichia coli | physical association | intact | EBI-1140593 |
| Escherichia coli | association          | intact | EBI-894357  |
| Escherichia coli | physical association | intact | EBI-880513  |
| Escherichia coli | association          | intact | EBI-894357  |
| Escherichia coli | association          | intact | EBI-894357  |
| Escherichia coli | association          | intact | EBI-894357  |

|                  |                      |        |             |
|------------------|----------------------|--------|-------------|
| Escherichia coli | association          | intact | EBI-882248  |
| Escherichia coli | association          | intact | EBI-889827  |
| Escherichia coli | association          | intact | EBI-882248  |
| Escherichia coli | physical association | intact | EBI-1146140 |
| Escherichia coli | association          | intact | EBI-882248  |
| Escherichia coli | association          | intact | EBI-889827  |
| Escherichia coli | association          | intact | EBI-889827  |
| Escherichia coli | association          | intact | EBI-889827  |
| Escherichia coli | association          | intact | EBI-889827  |
| Escherichia coli | association          | intact | EBI-889827  |
| Escherichia coli | association          | intact | EBI-889827  |
| Escherichia coli | association          | intact | EBI-889827  |
| Escherichia coli | association          | intact | EBI-889827  |
| Escherichia coli | association          | intact | EBI-889827  |
| Escherichia coli | association          | intact | EBI-889827  |
| Escherichia coli | association          | intact | EBI-889827  |
| Escherichia coli | association          | intact | EBI-882248  |
| Escherichia coli | association          | intact | EBI-889827  |
| Escherichia coli | association          | intact | EBI-1146135 |
| Escherichia coli | association          | intact | EBI-1146135 |
| Escherichia coli | association          | intact | EBI-1146135 |
| Escherichia coli | association          | intact | EBI-886272  |
| Escherichia coli | association          | intact | EBI-1135335 |
| Escherichia coli | physical association | intact | EBI-889355  |
| Escherichia coli | association          | intact | EBI-1135335 |
| Escherichia coli | association          | intact | EBI-886272  |
| Escherichia coli | association          | intact | EBI-886272  |
| Escherichia coli | association          | intact | EBI-886272  |
| Escherichia coli | association          | intact | EBI-1135335 |
| Escherichia coli | association          | intact | EBI-886272  |
| Escherichia coli | association          | intact | EBI-895256  |
| Escherichia coli | association          | intact | EBI-895256  |
| Escherichia coli | association          | intact | EBI-890312  |
| Escherichia coli | association          | intact | EBI-1144197 |
| Escherichia coli | association          | intact | EBI-895256  |
| Escherichia coli | association          | intact | EBI-1144197 |
| Escherichia coli | association          | intact | EBI-1144197 |
| Escherichia coli | association          | intact | EBI-895256  |
| Escherichia coli | association          | intact | EBI-890312  |
| Escherichia coli | association          | intact | EBI-890312  |
| Escherichia coli | association          | intact | EBI-1144197 |
| Escherichia coli | association          | intact | EBI-895256  |





|                  |                      |        |             |
|------------------|----------------------|--------|-------------|
| Escherichia coli | association          | intact | EBI-884548  |
| Escherichia coli | association          | intact | EBI-884548  |
| Escherichia coli | association          | intact | EBI-884548  |
| Escherichia coli | association          | intact | EBI-884548  |
| Escherichia coli | association          | intact | EBI-884548  |
| Escherichia coli | association          | intact | EBI-1140596 |
| Escherichia coli | association          | intact | EBI-884548  |
| Escherichia coli | association          | intact | EBI-884548  |
| Escherichia coli | association          | intact | EBI-884548  |
| Escherichia coli | association          | intact | EBI-884548  |
| Escherichia coli | association          | intact | EBI-1140596 |
| Escherichia coli | association          | intact | EBI-884548  |
| Escherichia coli | association          | intact | EBI-884548  |
| Escherichia coli | physical association | intact | EBI-1147767 |
| Escherichia coli | association          | intact | EBI-1145723 |
| Escherichia coli | association          | intact | EBI-1145723 |
| Escherichia coli | association          | intact | EBI-1145723 |
| Escherichia coli | association          | intact | EBI-1145723 |
| Escherichia coli | association          | intact | EBI-1145723 |
| Escherichia coli | association          | intact | EBI-891201  |
| Escherichia coli | association          | intact | EBI-891201  |
| Escherichia coli | association          | intact | EBI-1145723 |
| Escherichia coli | association          | intact | EBI-891201  |
| Escherichia coli | association          | intact | EBI-1145723 |
| Escherichia coli | association          | intact | EBI-891201  |
| Escherichia coli | association          | intact | EBI-1145723 |
| Escherichia coli | association          | intact | EBI-1140336 |
| Escherichia coli | association          | intact | EBI-1140336 |
| Escherichia coli | association          | intact | EBI-885248  |
| Escherichia coli | association          | intact | EBI-891999  |
| Escherichia coli | association          | intact | EBI-1140336 |
| Escherichia coli | association          | intact | EBI-891999  |
| Escherichia coli | association          | intact | EBI-885248  |
| Escherichia coli | association          | intact | EBI-891999  |
| Escherichia coli | association          | intact | EBI-1142924 |
| Escherichia coli | association          | intact | EBI-1142924 |
| Escherichia coli | physical association | intact | EBI-1771045 |





|                  |             |        |             |
|------------------|-------------|--------|-------------|
| Escherichia coli | association | intact | EBI-892692  |
| Escherichia coli | association | intact | EBI-886205  |
| Escherichia coli | association | intact | EBI-892692  |
| Escherichia coli | association | intact | EBI-886205  |
| Escherichia coli | association | intact | EBI-886205  |
| Escherichia coli | association | intact | EBI-886205  |
| Escherichia coli | association | intact | EBI-886205  |
| Escherichia coli | association | intact | EBI-892692  |
| Escherichia coli | association | intact | EBI-892692  |
| Escherichia coli | association | intact | EBI-892692  |
| Escherichia coli | association | intact | EBI-892692  |
| Escherichia coli | association | intact | EBI-892692  |
| Escherichia coli | association | intact | EBI-886205  |
| Escherichia coli | association | intact | EBI-892692  |
| Escherichia coli | association | intact | EBI-1136301 |
| Escherichia coli | association | intact | EBI-1136301 |
| Escherichia coli | association | intact | EBI-1136559 |
| Escherichia coli | association | intact | EBI-1136559 |
| Escherichia coli | association | intact | EBI-1136559 |
| Escherichia coli | association | intact | EBI-1138884 |
| Escherichia coli | association | intact | EBI-1138884 |
| Escherichia coli | association | intact | EBI-1138884 |
| Escherichia coli | association | intact | EBI-1138884 |
| Escherichia coli | association | intact | EBI-1138884 |
| Escherichia coli | association | intact | EBI-1136521 |
| Escherichia coli | association | intact | EBI-1136521 |
| Escherichia coli | association | intact | EBI-1136521 |
| Escherichia coli | association | intact | EBI-1136521 |
| Escherichia coli | association | intact | EBI-1136521 |
| Escherichia coli | association | intact | EBI-1136521 |
| Escherichia coli | association | intact | EBI-1136521 |
| Escherichia coli | association | intact | EBI-1136521 |
| Escherichia coli | association | intact | EBI-371377  |
| Escherichia coli | association | intact | EBI-369356  |
| Escherichia coli | association | intact | EBI-371168  |
| Escherichia coli | association | intact | EBI-371168  |
| Escherichia coli | association | intact | EBI-371377  |
| Escherichia coli | association | intact | EBI-371168  |





|                  |             |        |            |
|------------------|-------------|--------|------------|
| Escherichia coli | association | intact | EBI-369356 |
| Escherichia coli | association | intact | EBI-369356 |
| Escherichia coli | association | intact | EBI-369356 |
| Escherichia coli | association | intact | EBI-371168 |
| Escherichia coli | association | intact | EBI-369356 |
| Escherichia coli | association | intact | EBI-371168 |
| Escherichia coli | association | intact | EBI-369356 |
| Escherichia coli | association | intact | EBI-369356 |
| Escherichia coli | association | intact | EBI-371168 |
| Escherichia coli | association | intact | EBI-371168 |

|                  |                      |        |             |
|------------------|----------------------|--------|-------------|
| Escherichia coli | physical association | intact | EBI-1135301 |
|------------------|----------------------|--------|-------------|

|                  |             |        |             |
|------------------|-------------|--------|-------------|
| Escherichia coli | association | intact | EBI-895036  |
| Escherichia coli | association | intact | EBI-2463360 |
| Escherichia coli | association | intact | EBI-2463360 |
| Escherichia coli | association | intact | EBI-2463360 |
| Escherichia coli | association | intact | EBI-895036  |
| Escherichia coli | association | intact | EBI-2463360 |
| Escherichia coli | association | intact | EBI-1136591 |
| Escherichia coli | association | intact | EBI-2463360 |
| Escherichia coli | association | intact | EBI-2463360 |
| Escherichia coli | association | intact | EBI-2463360 |
| Escherichia coli | association | intact | EBI-895036  |
| Escherichia coli | association | intact | EBI-1136591 |
| Escherichia coli | association | intact | EBI-2463360 |
| Escherichia coli | association | intact | EBI-1136591 |
| Escherichia coli | association | intact | EBI-2463360 |
| Escherichia coli | association | intact | EBI-1136591 |
| Escherichia coli | association | intact | EBI-1136591 |
| Escherichia coli | association | intact | EBI-2463360 |
| Escherichia coli | association | intact | EBI-2463360 |
| Escherichia coli | association | intact | EBI-2463360 |
| Escherichia coli | association | intact | EBI-1136591 |
| Escherichia coli | association | intact | EBI-1136591 |
| Escherichia coli | association | intact | EBI-2463360 |
| Escherichia coli | association | intact | EBI-2463360 |
| Escherichia coli | association | intact | EBI-2463360 |
| Escherichia coli | association | intact | EBI-2463360 |
| Escherichia coli | association | intact | EBI-895036  |



|                  |                      |        |             |
|------------------|----------------------|--------|-------------|
| Escherichia coli | association          | intact | EBI-2463360 |
| Escherichia coli | association          | intact | EBI-895036  |
| Escherichia coli | association          | intact | EBI-2463360 |
| Escherichia coli | association          | intact | EBI-2463360 |
| Escherichia coli | association          | intact | EBI-1136591 |
| Escherichia coli | association          | intact | EBI-2463360 |
| Escherichia coli | association          | intact | EBI-2463360 |
| Escherichia coli | association          | intact | EBI-2463360 |
| Escherichia coli | association          | intact | EBI-1136591 |
| Escherichia coli | association          | intact | EBI-1136591 |
| Escherichia coli | association          | intact | EBI-1136591 |
| Escherichia coli | association          | intact | EBI-895036  |
| Escherichia coli | association          | intact | EBI-2463360 |
| Escherichia coli | association          | intact | EBI-2463360 |
| Escherichia coli | association          | intact | EBI-2463360 |
| Escherichia coli | association          | intact | EBI-2463360 |
| Escherichia coli | association          | intact | EBI-895036  |
| Escherichia coli | association          | intact | EBI-2463360 |
| Escherichia coli | association          | intact | EBI-1136591 |
| Escherichia coli | association          | intact | EBI-2463360 |
| Escherichia coli | association          | intact | EBI-1136591 |
| Escherichia coli | association          | intact | EBI-2463360 |
| Escherichia coli | association          | intact | EBI-1136591 |
| Escherichia coli | association          | intact | EBI-895036  |
| Escherichia coli | association          | intact | EBI-1136591 |
| Escherichia coli | association          | intact | EBI-2463360 |
| Escherichia coli | association          | intact | EBI-895036  |
| Escherichia coli | association          | intact | EBI-2463360 |
| Escherichia coli | association          | intact | EBI-2463360 |
| Escherichia coli | association          | intact | EBI-2463360 |
| Escherichia coli | physical association | intact | EBI-1771052 |
| Escherichia coli | association          | intact | EBI-1136591 |
| Escherichia coli | association          | intact | EBI-1136591 |
| Escherichia coli | association          | intact | EBI-2463360 |
| Escherichia coli | association          | intact | EBI-895036  |
| Escherichia coli | association          | intact | EBI-2463360 |
| Escherichia coli | physical association | intact | EBI-2369446 |
| Escherichia coli | association          | intact | EBI-895036  |

|                  |             |        |            |
|------------------|-------------|--------|------------|
| Escherichia coli | association | intact | EBI-895036 |
|------------------|-------------|--------|------------|

|                  |                      |        |            |
|------------------|----------------------|--------|------------|
| Escherichia coli | physical association | intact | EBI-878854 |
|------------------|----------------------|--------|------------|

|                  |                      |        |             |
|------------------|----------------------|--------|-------------|
| Escherichia coli | association          | intact | EBI-893705  |
| Escherichia coli | association          | intact | EBI-893705  |
| Escherichia coli | association          | intact | EBI-888130  |
| Escherichia coli | physical association | intact | EBI-2369602 |
| Escherichia coli | association          | intact | EBI-893705  |
| Escherichia coli | association          | intact | EBI-1139424 |
| Escherichia coli | association          | intact | EBI-888130  |
| Escherichia coli | association          | intact | EBI-893705  |
| Escherichia coli | association          | intact | EBI-888130  |
| Escherichia coli | association          | intact | EBI-888130  |
| Escherichia coli | association          | intact | EBI-888130  |
| Escherichia coli | association          | intact | EBI-888130  |
| Escherichia coli | association          | intact | EBI-888130  |
| Escherichia coli | association          | intact | EBI-888130  |
| Escherichia coli | association          | intact | EBI-888130  |
| Escherichia coli | association          | intact | EBI-888130  |
| Escherichia coli | association          | intact | EBI-888130  |
| Escherichia coli | association          | intact | EBI-888130  |
| Escherichia coli | association          | intact | EBI-888130  |
| Escherichia coli | association          | intact | EBI-893705  |
| Escherichia coli | physical association | intact | EBI-2369608 |
| Escherichia coli | association          | intact | EBI-893705  |
| Escherichia coli | association          | intact | EBI-888130  |
| Escherichia coli | association          | intact | EBI-888130  |
| Escherichia coli | association          | intact | EBI-888130  |
| Escherichia coli | physical association | intact | EBI-2369599 |
| Escherichia coli | association          | intact | EBI-893705  |
| Escherichia coli | association          | intact | EBI-1139424 |

|                  |             |        |             |
|------------------|-------------|--------|-------------|
| Escherichia coli | association | intact | EBI-1139555 |
| Escherichia coli | association | intact | EBI-1139555 |

|                  |             |        |             |
|------------------|-------------|--------|-------------|
| Escherichia coli | association | intact | EBI-1139155 |
|------------------|-------------|--------|-------------|

|                  |             |        |             |
|------------------|-------------|--------|-------------|
| Escherichia coli | association | intact | EBI-1147737 |
| Escherichia coli | association | intact | EBI-1147737 |
| Escherichia coli | association | intact | EBI-1147737 |
| Escherichia coli | association | intact | EBI-1147737 |
| Escherichia coli | association | intact | EBI-1147737 |
| Escherichia coli | association | intact | EBI-1147737 |
| Escherichia coli | association | intact | EBI-1147737 |

|                  |             |        |             |
|------------------|-------------|--------|-------------|
| Escherichia coli | association | intact | EBI-1147746 |
| Escherichia coli | association | intact | EBI-1147746 |
| Escherichia coli | association | intact | EBI-1147746 |
| Escherichia coli | association | intact | EBI-1147746 |
| Escherichia coli | association | intact | EBI-1147746 |
| Escherichia coli | association | intact | EBI-1147746 |

|                  |                      |        |             |
|------------------|----------------------|--------|-------------|
| Escherichia coli | association          | intact | EBI-1144466 |
| Escherichia coli | association          | intact | EBI-882273  |
| Escherichia coli | association          | intact | EBI-882273  |
| Escherichia coli | association          | intact | EBI-882273  |
| Escherichia coli | association          | intact | EBI-882273  |
| Escherichia coli | physical association | intact | EBI-2370504 |
| Escherichia coli | physical association | intact | EBI-2370497 |
| Escherichia coli | physical association | intact | EBI-2370517 |
| Escherichia coli | association          | intact | EBI-882273  |
| Escherichia coli | association          | intact | EBI-882273  |
| Escherichia coli | association          | intact | EBI-1144466 |
| Escherichia coli | association          | intact | EBI-882273  |
| Escherichia coli | association          | intact | EBI-882273  |
| Escherichia coli | association          | intact | EBI-882273  |





|                  |                      |        |             |
|------------------|----------------------|--------|-------------|
| Escherichia coli | association          | intact | EBI-1140241 |
| Escherichia coli | association          | intact | EBI-1140241 |
| Escherichia coli | association          | intact | EBI-1145622 |
| Escherichia coli | association          | intact | EBI-1145622 |
| Escherichia coli | association          | intact | EBI-1145622 |
| Escherichia coli | association          | intact | EBI-1145622 |
| Escherichia coli | physical association | intact | EBI-1139552 |
| Escherichia coli | physical association | intact | EBI-885269  |
| Escherichia coli | association          | intact | EBI-1146759 |
| Escherichia coli | association          | intact | EBI-1146759 |
| Escherichia coli | association          | intact | EBI-1146759 |
| Escherichia coli | association          | intact | EBI-890557  |
| Escherichia coli | association          | intact | EBI-1146759 |
| Escherichia coli | association          | intact | EBI-1146759 |
| Escherichia coli | physical association | intact | EBI-883223  |
| Escherichia coli | association          | intact | EBI-890557  |
| Escherichia coli | association          | intact | EBI-1137645 |
| Escherichia coli | association          | intact | EBI-1137645 |
| Escherichia coli | association          | intact | EBI-1137645 |
| Escherichia coli | physical association | intact | EBI-882246  |
| Escherichia coli | physical association | intact | EBI-1146753 |
| Escherichia coli | association          | intact | EBI-894652  |
| Escherichia coli | association          | intact | EBI-889746  |
| Escherichia coli | physical association | intact | EBI-1147646 |
| Escherichia coli | association          | intact | EBI-894652  |
| Escherichia coli | association          | intact | EBI-894652  |
| Escherichia coli | association          | intact | EBI-894652  |
| Escherichia coli | association          | intact | EBI-889746  |
| Escherichia coli | association          | intact | EBI-894652  |
| Escherichia coli | association          | intact | EBI-894652  |
| Escherichia coli | association          | intact | EBI-889746  |
| Escherichia coli | association          | intact | EBI-894652  |
| Escherichia coli | association          | intact | EBI-889746  |
| Escherichia coli | association          | intact | EBI-889746  |



|                  |                      |        |             |
|------------------|----------------------|--------|-------------|
| Escherichia coli | association          | intact | EBI-1142543 |
| Escherichia coli | physical association | intact | EBI-907385  |
| Escherichia coli | association          | intact | EBI-884632  |
| Escherichia coli | association          | intact | EBI-884632  |
| Escherichia coli | association          | intact | EBI-884632  |
| Escherichia coli | association          | intact | EBI-879802  |
| Escherichia coli | association          | intact | EBI-884632  |
| Escherichia coli | association          | intact | EBI-1142543 |
| Escherichia coli | association          | intact | EBI-879802  |
| Escherichia coli | association          | intact | EBI-1142543 |
| Escherichia coli | physical association | intact | EBI-907018  |
| Escherichia coli | association          | intact | EBI-884632  |
| Escherichia coli | association          | intact | EBI-1142543 |
| Escherichia coli | association          | intact | EBI-1142543 |
| Escherichia coli | association          | intact | EBI-1146025 |
| Escherichia coli | association          | intact | EBI-1146025 |
| Escherichia coli | association          | intact | EBI-1146025 |

|                  |             |        |             |
|------------------|-------------|--------|-------------|
| Escherichia coli | association | intact | EBI-1139703 |
| Escherichia coli | association | intact | EBI-1139703 |
| Escherichia coli | association | intact | EBI-1139703 |
| Escherichia coli | association | intact | EBI-1139703 |
| Escherichia coli | association | intact | EBI-1139703 |
| Escherichia coli | association | intact | EBI-1139703 |
| Escherichia coli | association | intact | EBI-1139703 |
| Escherichia coli | association | intact | EBI-1139703 |
| Escherichia coli | association | intact | EBI-1139703 |
| Escherichia coli | association | intact | EBI-1139703 |
| Escherichia coli | association | intact | EBI-1139703 |
| Escherichia coli | association | intact | EBI-1139703 |
| Escherichia coli | association | intact | EBI-1139703 |
| Escherichia coli | association | intact | EBI-1139703 |
| Escherichia coli | association | intact | EBI-1139703 |
| Escherichia coli | association | intact | EBI-1139703 |
| Escherichia coli | association | intact | EBI-1139703 |
| Escherichia coli | association | intact | EBI-1139703 |
| Escherichia coli | association | intact | EBI-1139703 |
| Escherichia coli | association | intact | EBI-1137384 |
| Escherichia coli | association | intact | EBI-1137384 |

|                  |                      |        |             |
|------------------|----------------------|--------|-------------|
| Escherichia coli | association          | intact | EBI-1137384 |
| Escherichia coli | association          | intact | EBI-1137384 |
| Escherichia coli | physical association | intact | EBI-2011463 |
| Escherichia coli | association          | intact | EBI-878894  |
| Escherichia coli | association          | intact | EBI-1137384 |
| Escherichia coli | association          | intact | EBI-1137384 |
| Escherichia coli | association          | intact | EBI-1137384 |
| Escherichia coli | association          | intact | EBI-878894  |
| Escherichia coli | association          | intact | EBI-1137384 |
| Escherichia coli | association          | intact | EBI-878894  |
| Escherichia coli | association          | intact | EBI-1137384 |
| Escherichia coli | association          | intact | EBI-1137384 |
| Escherichia coli | association          | intact | EBI-878894  |
| Escherichia coli | association          | intact | EBI-1137384 |
| Escherichia coli | association          | intact | EBI-1137384 |
| Escherichia coli | association          | intact | EBI-1137384 |
| Escherichia coli | association          | intact | EBI-882058  |
| Escherichia coli | association          | intact | EBI-882058  |
| Escherichia coli | association          | intact | EBI-1137384 |
| Escherichia coli | association          | intact | EBI-1137384 |
| Escherichia coli | association          | intact | EBI-878894  |
| Escherichia coli | association          | intact | EBI-882058  |
| Escherichia coli | association          | intact | EBI-1137384 |
| Escherichia coli | association          | intact | EBI-878894  |
|                  |                      |        |             |
| Escherichia coli | association          | intact | EBI-892411  |
| Escherichia coli | association          | intact | EBI-1138463 |
| Escherichia coli | physical association | intact | EBI-885862  |
| Escherichia coli | association          | intact | EBI-892411  |
| Escherichia coli | association          | intact | EBI-892411  |
| Escherichia coli | association          | intact | EBI-1138463 |
| Escherichia coli | association          | intact | EBI-892411  |
|                  |                      |        |             |
| Escherichia coli | association          | intact | EBI-1147356 |
| Escherichia coli | association          | intact | EBI-1147356 |
| Escherichia coli | association          | intact | EBI-1147356 |
|                  |                      |        |             |
| Escherichia coli | association          | intact | EBI-887152  |
| Escherichia coli | association          | intact | EBI-887152  |
| Escherichia coli | association          | intact | EBI-887152  |
| Escherichia coli | association          | intact | EBI-887152  |
| Escherichia coli | association          | intact | EBI-880917  |
| Escherichia coli | association          | intact | EBI-887152  |



|                  |                      |        |             |
|------------------|----------------------|--------|-------------|
| Escherichia coli | association          | intact | EBI-880917  |
| Escherichia coli | association          | intact | EBI-1147864 |
| Escherichia coli | association          | intact | EBI-1147864 |
| Escherichia coli | association          | intact | EBI-1138601 |
| Escherichia coli | association          | intact | EBI-1138601 |
| Escherichia coli | association          | intact | EBI-884705  |
| Escherichia coli | association          | intact | EBI-1144212 |
| Escherichia coli | association          | intact | EBI-884705  |
| Escherichia coli | association          | intact | EBI-1144212 |
| Escherichia coli | association          | intact | EBI-1144212 |
| Escherichia coli | association          | intact | EBI-1144212 |
| Escherichia coli | physical association | intact | EBI-1135993 |
| Escherichia coli | association          | intact | EBI-1135675 |
| Escherichia coli | association          | intact | EBI-1135675 |
| Escherichia coli | physical association | intact | EBI-907382  |
| Escherichia coli | physical association | intact | EBI-1135942 |
| Escherichia coli | association          | intact | EBI-1136056 |
| Escherichia coli | association          | intact | EBI-1136056 |
| Escherichia coli | association          | intact | EBI-1136056 |
| Escherichia coli | association          | intact | EBI-1136056 |
| Escherichia coli | association          | intact | EBI-1136056 |
| Escherichia coli | association          | intact | EBI-1136090 |
| Escherichia coli | association          | intact | EBI-1136090 |
| Escherichia coli | association          | intact | EBI-1136090 |





|                  |             |        |             |
|------------------|-------------|--------|-------------|
| Escherichia coli | association | intact | EBI-1137127 |
| Escherichia coli | association | intact | EBI-1137127 |

|                  |                      |        |             |
|------------------|----------------------|--------|-------------|
| Escherichia coli | association          | intact | EBI-1137495 |
| Escherichia coli | physical association | intact | EBI-887698  |
| Escherichia coli | association          | intact | EBI-1137495 |
| Escherichia coli | association          | intact | EBI-1137495 |
| Escherichia coli | association          | intact | EBI-1137495 |
| Escherichia coli | association          | intact | EBI-1137495 |
| Escherichia coli | association          | intact | EBI-1137495 |

|                  |                      |        |            |
|------------------|----------------------|--------|------------|
| Escherichia coli | association          | intact | EBI-853009 |
| Escherichia coli | association          | intact | EBI-861755 |
| Escherichia coli | physical association | intact | EBI-861881 |
| Escherichia coli | association          | intact | EBI-853009 |
| Escherichia coli | association          | intact | EBI-861755 |
| Escherichia coli | association          | intact | EBI-853009 |
| Escherichia coli | association          | intact | EBI-861755 |
| Escherichia coli | association          | intact | EBI-879840 |
| Escherichia coli | physical association | intact | EBI-884687 |
| Escherichia coli | association          | intact | EBI-879840 |
| Escherichia coli | association          | intact | EBI-879840 |
| Escherichia coli | association          | intact | EBI-853009 |
| Escherichia coli | physical association | intact | EBI-853024 |
| Escherichia coli | association          | intact | EBI-853009 |
| Escherichia coli | association          | intact | EBI-879840 |

|                  |                      |        |             |
|------------------|----------------------|--------|-------------|
| Escherichia coli | association          | intact | EBI-1137753 |
| Escherichia coli | association          | intact | EBI-1137753 |
| Escherichia coli | association          | intact | EBI-1137753 |
| Escherichia coli | physical association | intact | EBI-907046  |
| Escherichia coli | association          | intact | EBI-1137753 |

|                  |             |        |             |
|------------------|-------------|--------|-------------|
| Escherichia coli | association | intact | EBI-1137759 |
| Escherichia coli | association | intact | EBI-1137759 |
| Escherichia coli | association | intact | EBI-1137759 |

|                  |             |        |             |
|------------------|-------------|--------|-------------|
| Escherichia coli | association | intact | EBI-1137764 |
| Escherichia coli | association | intact | EBI-1137764 |
| Escherichia coli | association | intact | EBI-1137764 |
| Escherichia coli | association | intact | EBI-1137764 |

|                  |                      |        |             |
|------------------|----------------------|--------|-------------|
| Escherichia coli | association          | intact | EBI-1138097 |
| Escherichia coli | association          | intact | EBI-1138097 |
| Escherichia coli | association          | intact | EBI-1138226 |
| Escherichia coli | association          | intact | EBI-1138226 |
| Escherichia coli | association          | intact | EBI-1138226 |
| Escherichia coli | physical association | intact | EBI-889127  |
| Escherichia coli | association          | intact | EBI-1138231 |
| Escherichia coli | association          | intact | EBI-1138231 |
| Escherichia coli | association          | intact | EBI-882921  |
| Escherichia coli | association          | intact | EBI-882921  |
| Escherichia coli | association          | intact | EBI-879208  |
| Escherichia coli | association          | intact | EBI-882921  |
| Escherichia coli | association          | intact | EBI-882921  |
| Escherichia coli | association          | intact | EBI-879208  |
| Escherichia coli | association          | intact | EBI-879208  |
| Escherichia coli | association          | intact | EBI-1138231 |
| Escherichia coli | association          | intact | EBI-882921  |
| Escherichia coli | association          | intact | EBI-1138231 |
| Escherichia coli | association          | intact | EBI-879208  |
| Escherichia coli | association          | intact | EBI-882921  |
| Escherichia coli | association          | intact | EBI-879208  |
| Escherichia coli | association          | intact | EBI-882921  |
| Escherichia coli | association          | intact | EBI-882921  |
| Escherichia coli | association          | intact | EBI-882921  |
| Escherichia coli | association          | intact | EBI-879208  |
| Escherichia coli | association          | intact | EBI-882921  |
| Escherichia coli | association          | intact | EBI-882921  |
| Escherichia coli | association          | intact | EBI-879208  |
| Escherichia coli | association          | intact | EBI-1138231 |
| Escherichia coli | association          | intact | EBI-882921  |
| Escherichia coli | association          | intact | EBI-882921  |
| Escherichia coli | association          | intact | EBI-879208  |
| Escherichia coli | association          | intact | EBI-882921  |
| Escherichia coli | association          | intact | EBI-882921  |





|                  |                      |        |             |
|------------------|----------------------|--------|-------------|
| Escherichia coli | association          | intact | EBI-1139235 |
| Escherichia coli | association          | intact | EBI-1139235 |
| Escherichia coli | association          | intact | EBI-1139235 |
| Escherichia coli | association          | intact | EBI-1139235 |
| Escherichia coli | physical association | intact | EBI-893845  |
| Escherichia coli | association          | intact | EBI-1139235 |
| Escherichia coli | association          | intact | EBI-1139235 |
| Escherichia coli | association          | intact | EBI-1139235 |
| Escherichia coli | association          | intact | EBI-1139235 |
| Escherichia coli | association          | intact | EBI-1139235 |
| Escherichia coli | association          | intact | EBI-1139235 |
| Escherichia coli | association          | intact | EBI-1139235 |
| Escherichia coli | association          | intact | EBI-1139235 |
| Escherichia coli | association          | intact | EBI-1139235 |
| Escherichia coli | association          | intact | EBI-1139235 |
| Escherichia coli | association          | intact | EBI-1139235 |
| Escherichia coli | association          | intact | EBI-1139235 |
| Escherichia coli | association          | intact | EBI-1139235 |
| Escherichia coli | association          | intact | EBI-1139235 |
| Escherichia coli | association          | intact | EBI-1139235 |
| Escherichia coli | association          | intact | EBI-1139235 |
| Escherichia coli | association          | intact | EBI-1139235 |
| Escherichia coli | association          | intact | EBI-1139235 |

|                  |                      |        |            |
|------------------|----------------------|--------|------------|
| Escherichia coli | association          | intact | EBI-893901 |
| Escherichia coli | association          | intact | EBI-893901 |
| Escherichia coli | physical association | intact | EBI-888756 |
| Escherichia coli | association          | intact | EBI-893901 |
| Escherichia coli | association          | intact | EBI-893901 |
| Escherichia coli | association          | intact | EBI-893901 |

|                  |             |        |             |
|------------------|-------------|--------|-------------|
| Escherichia coli | association | intact | EBI-1139537 |
| Escherichia coli | association | intact | EBI-1139537 |
| Escherichia coli | association | intact | EBI-1139537 |

|                  |             |        |             |
|------------------|-------------|--------|-------------|
| Escherichia coli | association | intact | EBI-1139564 |
|------------------|-------------|--------|-------------|

|                  |             |        |             |
|------------------|-------------|--------|-------------|
| Escherichia coli | association | intact | EBI-1139564 |
| Escherichia coli | association | intact | EBI-1139564 |
| Escherichia coli | association | intact | EBI-1139564 |
| Escherichia coli | association | intact | EBI-1139564 |

|                  |             |        |             |
|------------------|-------------|--------|-------------|
| Escherichia coli | association | intact | EBI-1139627 |
| Escherichia coli | association | intact | EBI-1139627 |
| Escherichia coli | association | intact | EBI-1139627 |
| Escherichia coli | association | intact | EBI-1139627 |

|                  |             |        |             |
|------------------|-------------|--------|-------------|
| Escherichia coli | association | intact | EBI-1139674 |
| Escherichia coli | association | intact | EBI-1139674 |
| Escherichia coli | association | intact | EBI-1139674 |

|                  |                      |        |             |
|------------------|----------------------|--------|-------------|
| Escherichia coli | physical association | intact | EBI-1139849 |
|------------------|----------------------|--------|-------------|

|                  |             |        |             |
|------------------|-------------|--------|-------------|
| Escherichia coli | association | intact | EBI-1139910 |
| Escherichia coli | association | intact | EBI-1139910 |
| Escherichia coli | association | intact | EBI-1139910 |
| Escherichia coli | association | intact | EBI-1139910 |
| Escherichia coli | association | intact | EBI-1139910 |

|                  |             |        |             |
|------------------|-------------|--------|-------------|
| Escherichia coli | association | intact | EBI-1140084 |
| Escherichia coli | association | intact | EBI-1140084 |
| Escherichia coli | association | intact | EBI-1140084 |
| Escherichia coli | association | intact | EBI-1140084 |
| Escherichia coli | association | intact | EBI-1140084 |
| Escherichia coli | association | intact | EBI-1140084 |
| Escherichia coli | association | intact | EBI-1140084 |

|                  |             |        |             |
|------------------|-------------|--------|-------------|
| Escherichia coli | association | intact | EBI-1140096 |
| Escherichia coli | association | intact | EBI-1140096 |
| Escherichia coli | association | intact | EBI-1140096 |

|                  |             |        |             |
|------------------|-------------|--------|-------------|
| Escherichia coli | association | intact | EBI-1140096 |
| Escherichia coli | association | intact | EBI-1140096 |
| Escherichia coli | association | intact | EBI-1140096 |
| Escherichia coli | association | intact | EBI-1140096 |
| Escherichia coli | association | intact | EBI-1140096 |
| Escherichia coli | association | intact | EBI-1140096 |

|                  |             |        |             |
|------------------|-------------|--------|-------------|
| Escherichia coli | association | intact | EBI-1140414 |
| Escherichia coli | association | intact | EBI-1140414 |
| Escherichia coli | association | intact | EBI-1140414 |
| Escherichia coli | association | intact | EBI-1140414 |
| Escherichia coli | association | intact | EBI-1140414 |
| Escherichia coli | association | intact | EBI-1140414 |
| Escherichia coli | association | intact | EBI-1140414 |
| Escherichia coli | association | intact | EBI-1140414 |
| Escherichia coli | association | intact | EBI-1140414 |
| Escherichia coli | association | intact | EBI-1140414 |
| Escherichia coli | association | intact | EBI-1140414 |
| Escherichia coli | association | intact | EBI-1140414 |
| Escherichia coli | association | intact | EBI-1140414 |
| Escherichia coli | association | intact | EBI-1140414 |

|                  |                      |        |            |
|------------------|----------------------|--------|------------|
| Escherichia coli | physical association | intact | EBI-893871 |
| Escherichia coli | association          | intact | EBI-883851 |
| Escherichia coli | association          | intact | EBI-883851 |

|                  |             |        |            |
|------------------|-------------|--------|------------|
| Escherichia coli | association | intact | EBI-890196 |
| Escherichia coli | association | intact | EBI-890196 |
| Escherichia coli | association | intact | EBI-890196 |
| Escherichia coli | association | intact | EBI-890196 |
| Escherichia coli | association | intact | EBI-890196 |
| Escherichia coli | association | intact | EBI-890196 |
| Escherichia coli | association | intact | EBI-890196 |
| Escherichia coli | association | intact | EBI-890196 |
| Escherichia coli | association | intact | EBI-890196 |

|                  |             |        |             |
|------------------|-------------|--------|-------------|
| Escherichia coli | association | intact | EBI-1140722 |
| Escherichia coli | association | intact | EBI-1140722 |
| Escherichia coli | association | intact | EBI-1140722 |





|                  |             |        |             |
|------------------|-------------|--------|-------------|
| Escherichia coli | association | intact | EBI-881680  |
| Escherichia coli | association | intact | EBI-1140882 |
| Escherichia coli | association | intact | EBI-1140882 |
| Escherichia coli | association | intact | EBI-881680  |
| Escherichia coli | association | intact | EBI-1140882 |
| Escherichia coli | association | intact | EBI-1140882 |
| Escherichia coli | association | intact | EBI-1140882 |
| Escherichia coli | association | intact | EBI-1140882 |

|                  |             |        |             |
|------------------|-------------|--------|-------------|
| Escherichia coli | association | intact | EBI-1141091 |
| Escherichia coli | association | intact | EBI-1141091 |
| Escherichia coli | association | intact | EBI-893792  |
| Escherichia coli | association | intact | EBI-1141091 |
| Escherichia coli | association | intact | EBI-1141091 |
| Escherichia coli | association | intact | EBI-1141091 |
| Escherichia coli | association | intact | EBI-1141091 |
| Escherichia coli | association | intact | EBI-893792  |
| Escherichia coli | association | intact | EBI-1141091 |
| Escherichia coli | association | intact | EBI-1141091 |
| Escherichia coli | association | intact | EBI-1141091 |
| Escherichia coli | association | intact | EBI-1141091 |
| Escherichia coli | association | intact | EBI-1141091 |
| Escherichia coli | association | intact | EBI-1141091 |
| Escherichia coli | association | intact | EBI-893792  |
| Escherichia coli | association | intact | EBI-893792  |

|                  |             |        |             |
|------------------|-------------|--------|-------------|
| Escherichia coli | association | intact | EBI-1141336 |
| Escherichia coli | association | intact | EBI-1141336 |
| Escherichia coli | association | intact | EBI-1141336 |

|                  |             |        |             |
|------------------|-------------|--------|-------------|
| Escherichia coli | association | intact | EBI-1141414 |
| Escherichia coli | association | intact | EBI-1141414 |
| Escherichia coli | association | intact | EBI-1141414 |



|                  |                      |        |             |
|------------------|----------------------|--------|-------------|
| Escherichia coli | physical association | intact | EBI-907082  |
| Escherichia coli | association          | intact | EBI-891424  |
| Escherichia coli | association          | intact | EBI-891424  |
| Escherichia coli | association          | intact | EBI-879491  |
| Escherichia coli | association          | intact | EBI-1143364 |
| Escherichia coli | association          | intact | EBI-879491  |
| Escherichia coli | association          | intact | EBI-1143364 |
| Escherichia coli | association          | intact | EBI-1143364 |
| Escherichia coli | association          | intact | EBI-1143364 |
| Escherichia coli | association          | intact | EBI-879491  |
| Escherichia coli | association          | intact | EBI-879491  |
| Escherichia coli | association          | intact | EBI-891424  |
| Escherichia coli | association          | intact | EBI-891424  |
| Escherichia coli | association          | intact | EBI-1143364 |
| Escherichia coli | association          | intact | EBI-891424  |
| Escherichia coli | association          | intact | EBI-879491  |
| Escherichia coli | association          | intact | EBI-891424  |
| Escherichia coli | association          | intact | EBI-1143364 |
| Escherichia coli | association          | intact | EBI-891424  |
| Escherichia coli | association          | intact | EBI-891424  |
| Escherichia coli | association          | intact | EBI-879491  |
| Escherichia coli | association          | intact | EBI-891424  |
| Escherichia coli | association          | intact | EBI-879491  |
| Escherichia coli | association          | intact | EBI-879491  |
| Escherichia coli | association          | intact | EBI-879491  |
| Escherichia coli | association          | intact | EBI-879491  |
| Escherichia coli | association          | intact | EBI-879491  |
| Escherichia coli | association          | intact | EBI-891424  |
| Escherichia coli | association          | intact | EBI-891424  |
| Escherichia coli | association          | intact | EBI-879491  |
| Escherichia coli | association          | intact | EBI-891424  |
| Escherichia coli | association          | intact | EBI-891424  |
| Escherichia coli | association          | intact | EBI-891424  |
| Escherichia coli | association          | intact | EBI-891424  |
| Escherichia coli | association          | intact | EBI-891424  |

|                  |             |        |             |
|------------------|-------------|--------|-------------|
| Escherichia coli | association | intact | EBI-891424  |
| Escherichia coli | association | intact | EBI-891424  |
| Escherichia coli | association | intact | EBI-891424  |
| Escherichia coli | association | intact | EBI-879491  |
| Escherichia coli | association | intact | EBI-879491  |
| Escherichia coli | association | intact | EBI-891424  |
| Escherichia coli | association | intact | EBI-1143364 |
| Escherichia coli | association | intact | EBI-879491  |
| Escherichia coli | association | intact | EBI-891424  |
| Escherichia coli | association | intact | EBI-879491  |
| Escherichia coli | association | intact | EBI-891424  |
| Escherichia coli | association | intact | EBI-879491  |
| Escherichia coli | association | intact | EBI-891424  |
| Escherichia coli | association | intact | EBI-891424  |
| Escherichia coli | association | intact | EBI-891424  |
| Escherichia coli | association | intact | EBI-1143364 |
| Escherichia coli | association | intact | EBI-891424  |

|                  |             |        |             |
|------------------|-------------|--------|-------------|
| Escherichia coli | association | intact | EBI-1144166 |
| Escherichia coli | association | intact | EBI-1144166 |
| Escherichia coli | association | intact | EBI-1144166 |
| Escherichia coli | association | intact | EBI-1144166 |

|                  |             |        |             |
|------------------|-------------|--------|-------------|
| Escherichia coli | association | intact | EBI-1144233 |
| Escherichia coli | association | intact | EBI-1144233 |
| Escherichia coli | association | intact | EBI-1144233 |
| Escherichia coli | association | intact | EBI-1144233 |

|                  |             |        |            |
|------------------|-------------|--------|------------|
| Escherichia coli | association | intact | EBI-890430 |
|------------------|-------------|--------|------------|

|                  |                      |        |             |
|------------------|----------------------|--------|-------------|
| Escherichia coli | association          | intact | EBI-890430  |
| Escherichia coli | association          | intact | EBI-1144536 |
| Escherichia coli | association          | intact | EBI-1144536 |
| Escherichia coli | physical association | intact | EBI-1144590 |
| Escherichia coli | association          | intact | EBI-1144951 |
| Escherichia coli | association          | intact | EBI-1144951 |
| Escherichia coli | association          | intact | EBI-1144951 |
| Escherichia coli | association          | intact | EBI-1144951 |
| Escherichia coli | association          | intact | EBI-1144951 |
| Escherichia coli | association          | intact | EBI-1144951 |
| Escherichia coli | association          | intact | EBI-1144951 |
| Escherichia coli | association          | intact | EBI-1144951 |
| Escherichia coli | association          | intact | EBI-1145294 |
| Escherichia coli | association          | intact | EBI-1145294 |
| Escherichia coli | association          | intact | EBI-1145667 |
| Escherichia coli | association          | intact | EBI-1145667 |
| Escherichia coli | association          | intact | EBI-1145821 |
| Escherichia coli | association          | intact | EBI-1145821 |
| Escherichia coli | physical association | intact | EBI-1145944 |



|                  |             |        |             |
|------------------|-------------|--------|-------------|
| Escherichia coli | association | intact | EBI-1147040 |
| Escherichia coli | association | intact | EBI-1147040 |
| Escherichia coli | association | intact | EBI-1147040 |
| Escherichia coli | association | intact | EBI-1147040 |
| Escherichia coli | association | intact | EBI-1147040 |
| Escherichia coli | association | intact | EBI-1147040 |
| Escherichia coli | association | intact | EBI-1147040 |

|                  |                      |        |             |
|------------------|----------------------|--------|-------------|
| Escherichia coli | physical association | intact | EBI-1147353 |
|------------------|----------------------|--------|-------------|

|                  |             |        |             |
|------------------|-------------|--------|-------------|
| Escherichia coli | association | intact | EBI-891042  |
| Escherichia coli | association | intact | EBI-891042  |
| Escherichia coli | association | intact | EBI-891042  |
| Escherichia coli | association | intact | EBI-891042  |
| Escherichia coli | association | intact | EBI-891042  |
| Escherichia coli | association | intact | EBI-1147604 |
| Escherichia coli | association | intact | EBI-1147604 |
| Escherichia coli | association | intact | EBI-1147604 |
| Escherichia coli | association | intact | EBI-891042  |
| Escherichia coli | association | intact | EBI-891042  |
| Escherichia coli | association | intact | EBI-1147604 |
| Escherichia coli | association | intact | EBI-891042  |
| Escherichia coli | association | intact | EBI-891042  |
| Escherichia coli | association | intact | EBI-1147604 |
| Escherichia coli | association | intact | EBI-1147604 |
| Escherichia coli | association | intact | EBI-1147604 |
| Escherichia coli | association | intact | EBI-1147604 |
| Escherichia coli | association | intact | EBI-883876  |
| Escherichia coli | association | intact | EBI-883876  |
| Escherichia coli | association | intact | EBI-1147604 |

|                  |             |        |             |
|------------------|-------------|--------|-------------|
| Escherichia coli | association | intact | EBI-892878  |
| Escherichia coli | association | intact | EBI-886481  |
| Escherichia coli | association | intact | EBI-892878  |
| Escherichia coli | association | intact | EBI-886481  |
| Escherichia coli | association | intact | EBI-892878  |
| Escherichia coli | association | intact | EBI-886481  |
| Escherichia coli | association | intact | EBI-1147600 |
| Escherichia coli | association | intact | EBI-1147600 |
| Escherichia coli | association | intact | EBI-886481  |

|                  |             |        |            |
|------------------|-------------|--------|------------|
| Escherichia coli | association | intact | EBI-878990 |
| Escherichia coli | association | intact | EBI-893104 |
| Escherichia coli | association | intact | EBI-893104 |
| Escherichia coli | association | intact | EBI-893104 |
| Escherichia coli | association | intact | EBI-893104 |
| Escherichia coli | association | intact | EBI-878990 |
| Escherichia coli | association | intact | EBI-878990 |

|                  |                      |        |             |
|------------------|----------------------|--------|-------------|
| Escherichia coli | physical association | intact | EBI-1147871 |
|------------------|----------------------|--------|-------------|

|                  |                      |        |            |
|------------------|----------------------|--------|------------|
| Escherichia coli | physical association | intact | EBI-881911 |
|------------------|----------------------|--------|------------|

|                  |                      |        |             |
|------------------|----------------------|--------|-------------|
| Escherichia coli | physical association | intact | EBI-1147982 |
|------------------|----------------------|--------|-------------|

|                  |                      |        |             |
|------------------|----------------------|--------|-------------|
| Escherichia coli | physical association | intact | EBI-2369877 |
|------------------|----------------------|--------|-------------|



|                  |             |        |             |
|------------------|-------------|--------|-------------|
| Escherichia coli | association | intact | EBI-1144399 |
| Escherichia coli | association | intact | EBI-1144399 |
| Escherichia coli | association | intact | EBI-1144399 |
| Escherichia coli | association | intact | EBI-1144399 |
| Escherichia coli | association | intact | EBI-1144399 |
| Escherichia coli | association | intact | EBI-1144399 |
| Escherichia coli | association | intact | EBI-1144399 |
| Escherichia coli | association | intact | EBI-1144399 |

|                  |             |        |             |
|------------------|-------------|--------|-------------|
| Escherichia coli | association | intact | EBI-1144545 |
| Escherichia coli | association | intact | EBI-1144545 |

|                  |             |        |             |
|------------------|-------------|--------|-------------|
| Escherichia coli | association | intact | EBI-1144649 |
| Escherichia coli | association | intact | EBI-1144649 |
| Escherichia coli | association | intact | EBI-1144649 |
| Escherichia coli | association | intact | EBI-1144649 |

|                  |             |        |             |
|------------------|-------------|--------|-------------|
| Escherichia coli | association | intact | EBI-1144747 |
| Escherichia coli | association | intact | EBI-1144747 |

|                  |                      |        |             |
|------------------|----------------------|--------|-------------|
| Escherichia coli | physical association | intact | EBI-1147695 |
|------------------|----------------------|--------|-------------|

|                  |             |        |             |
|------------------|-------------|--------|-------------|
| Escherichia coli | association | intact | EBI-1144280 |
| Escherichia coli | association | intact | EBI-1144280 |
| Escherichia coli | association | intact | EBI-1144280 |
