# Supplementary material
Source: PubMed Central journal article supplement (PMC5108054)
Supplement: NIHMS436991-supplement-S5_MBS_Prey.pdf [file NIHMS436991-supplement-S5_MBS_Prey.pdf]

| Accession | Entry Name  | * ID interactor A | ID interactor B | interactor A | interactor B |
|-----------|-------------|-------------------|-----------------|--------------|--------------|
| P00350    | 6PGD_ECOLI  | * P75914          | P00350          | ycdx_ecoli   | 6pgd_ecoli   |
| P00350    | 6PGD_ECOLI  | P37751            | P00350          | yefi_ecoli   | 6pgd_ecoli   |
| P52697    | 6PGL_ECOLI  | none              |                 |              |              |
| P00509    | AAT_ECOLI   | * P0A6D0          | P00509          | argr_ecoli   | aat_ecoli    |
| P00509    | AAT_ECOLI   | * P0AES4          | P00509          | gyra_ecoli   | aat_ecoli    |
| P00509    | AAT_ECOLI   | * P77495          | P00509          | prpe_ecoli   | aat_ecoli    |
| P0ABD5    | ACCA_ECOLI  | * P24182          | P0ABD5          | acc_c_ecoli  | acca_ecoli   |
| P0ABD5    | ACCA_ECOLI  | * P0A9Q5          | P0ABD5          | accd_ecoli   | acca_ecoli   |
| P0ABD5    | ACCA_ECOLI  | * P0A9Q5          | P0ABD5          | accd_ecoli   | acca_ecoli   |
| P0ABD5    | ACCA_ECOLI  | * P0A6A8          | P0ABD5          | acp_ecoli    | acca_ecoli   |
| P0ABD5    | ACCA_ECOLI  | * P0A9X9          | P0ABD5          | cspa_ecoli   | acca_ecoli   |
| P0ABD5    | ACCA_ECOLI  | P0A9Y6            | P0ABD5          | cspc_ecoli   | acca_ecoli   |
| P0ABD5    | ACCA_ECOLI  | * P0A9Y6          | P0ABD5          | cspc_ecoli   | acca_ecoli   |
| P0ABD5    | ACCA_ECOLI  | * P0A968          | P0ABD5          | cspd_ecoli   | acca_ecoli   |
| P0ABD5    | ACCA_ECOLI  | * P0A9P6          | P0ABD5          | dead_ecoli   | acca_ecoli   |
| P0ABD5    | ACCA_ECOLI  | * P0A6Q3          | P0ABD5          | faba_ecoli   | acca_ecoli   |
| P0ABD5    | ACCA_ECOLI  | * P0ACE7          | P0ABD5          | hint_ecoli   | acca_ecoli   |
| P0ABD5    | ACCA_ECOLI  | * P0A7B8          | P0ABD5          | hslv_ecoli   | acca_ecoli   |
| P0ABD5    | ACCA_ECOLI  | * P0A9X4          | P0ABD5          | mreb_ecoli   | acca_ecoli   |
| P0ABD5    | ACCA_ECOLI  | * P11458          | P0ABD5          | nada_ecoli   | acca_ecoli   |
| P0ABD5    | ACCA_ECOLI  | * P0A9L5          | P0ABD5          | ppic_ecoli   | acca_ecoli   |
| P0ABD5    | ACCA_ECOLI  | * P31473          | P0ABD5          | rava_ecoli   | acca_ecoli   |
| P0ABD5    | ACCA_ECOLI  | * P0AA39          | P0ABD5          | rluc_ecoli   | acca_ecoli   |
| P0ABD5    | ACCA_ECOLI  | * P00579          | P0ABD5          | rpod_ecoli   | acca_ecoli   |
| P0ABD5    | ACCA_ECOLI  | * P03018          | P0ABD5          | uvrd_ecoli   | acca_ecoli   |
| P24182    | ACCC_ECOLI  | * P0ABD8          | P24182          | bccp_ecoli   | acc_c_ecoli  |
| P24182    | ACCC_ECOLI  | * P28630          | P24182          | hola_ecoli   | acc_c_ecoli  |
| P24182    | ACCC_ECOLI  | P0A6H5            | P24182          | hslu_ecoli   | acc_c_ecoli  |
| P24182    | ACCC_ECOLI  | * P0A7B8          | P24182          | hslv_ecoli   | acc_c_ecoli  |
| P24182    | ACCC_ECOLI  | * P23869          | P24182          | ppib_ecoli   | acc_c_ecoli  |
| P24182    | ACCC_ECOLI  | P31473            | P24182          | rava_ecoli   | acc_c_ecoli  |
| P24182    | ACCC_ECOLI  | P25539            | P24182          | ribd_ecoli   | acc_c_ecoli  |
| P0A9G6    | ACEA_ECOLI  | * P0A890          | P0A9G6          | tusa_ecoli   | acea_ecoli   |
| Q46837    | ACFD_ECOLI  | none              |                 |              |              |
| P0A6A3    | ACKA_ECOLI  | none              |                 |              |              |
| P25516    | ACON1_ECOLI | * P0AEG4          | P25516          | dsba_ecoli   | acon1_ecoli  |

|        |             |   |        |        |                             |                             |
|--------|-------------|---|--------|--------|-----------------------------|-----------------------------|
| P25516 | ACON1_ECOLI | * | P0A722 | P25516 | <a href="#">lpxa_ecoli</a>  | <a href="#">acon1_ecoli</a> |
| P25516 | ACON1_ECOLI | * | P77515 | P25516 | <a href="#">stfq_ecoli</a>  | <a href="#">acon1_ecoli</a> |
| P36683 | ACON2_ECOLI |   | P24205 | P36683 | <a href="#">msbb_ecoli</a>  | <a href="#">acon2_ecoli</a> |
| P36683 | ACON2_ECOLI | * | P63020 | P36683 | <a href="#">nfua_ecoli</a>  | <a href="#">acon2_ecoli</a> |
| P36683 | ACON2_ECOLI | * | P37128 | P36683 | <a href="#">nudk_ecoli</a>  | <a href="#">acon2_ecoli</a> |
| P36683 | ACON2_ECOLI | * | P37906 | P36683 | <a href="#">puub_ecoli</a>  | <a href="#">acon2_ecoli</a> |
| P36683 | ACON2_ECOLI | * | P0AG20 | P36683 | <a href="#">rela_ecoli</a>  | <a href="#">acon2_ecoli</a> |
| P36683 | ACON2_ECOLI | * | P0A7F6 | P36683 | <a href="#">sped_ecoli</a>  | <a href="#">acon2_ecoli</a> |
| P36683 | ACON2_ECOLI | * | P21889 | P36683 | <a href="#">syd_ecoli</a>   | <a href="#">acon2_ecoli</a> |
| P36683 | ACON2_ECOLI | * | P0AA25 | P36683 | <a href="#">thio_ecoli</a>  | <a href="#">acon2_ecoli</a> |
| P36683 | ACON2_ECOLI | * | P0AA25 | P36683 | <a href="#">thio_ecoli</a>  | <a href="#">acon2_ecoli</a> |
| P36683 | ACON2_ECOLI | * | P0AA25 | P36683 | <a href="#">thio_ecoli</a>  | <a href="#">acon2_ecoli</a> |
| P36683 | ACON2_ECOLI | * | P46923 | P36683 | <a href="#">torz_ecoli</a>  | <a href="#">acon2_ecoli</a> |
| P36683 | ACON2_ECOLI | * | P00895 | P36683 | <a href="#">trpe_ecoli</a>  | <a href="#">acon2_ecoli</a> |
| P0A6A8 | ACP_ECOLI   | * | P0A9P6 | P0A6A8 | <a href="#">dead_ecoli</a>  | <a href="#">acp_ecoli</a>   |
| P0A6A8 | ACP_ECOLI   | * | P0AAI5 | P0A6A8 | <a href="#">fabf_ecoli</a>  | <a href="#">acp_ecoli</a>   |
| P0A6A8 | ACP_ECOLI   | * | P22523 | P0A6A8 | <a href="#">mukb_ecoli</a>  | <a href="#">acp_ecoli</a>   |
| P0A6A8 | ACP_ECOLI   | * | P0AG24 | P0A6A8 | <a href="#">spot_ecoli</a>  | <a href="#">acp_ecoli</a>   |
| P0A6A8 | ACP_ECOLI   | * | P0A8P8 | P0A6A8 | <a href="#">xerd_ecoli</a>  | <a href="#">acp_ecoli</a>   |
| P0A6A8 | ACP_ECOLI   | * | P0A8Z3 | P0A6A8 | <a href="#">ybgc_ecoli</a>  | <a href="#">acp_ecoli</a>   |
| P0A6A8 | ACP_ECOLI   | * | P0A894 | P0A6A8 | <a href="#">yhbj_ecoli</a>  | <a href="#">acp_ecoli</a>   |
| P0A6A8 | ACP_ECOLI   | * | P0ADQ2 | P0A6A8 | <a href="#">yiid_ecoli</a>  | <a href="#">acp_ecoli</a>   |
| P24180 | ACRE_ECOLI  |   | none   |        |                             |                             |
| P0ACS9 | ACRR_ECOLI  |   | none   |        |                             |                             |
| P22333 | ADD_ECOLI   | * | P08622 | P22333 | <a href="#">dnaj_ecoli</a>  | <a href="#">add_ecoli</a>   |
| P22333 | ADD_ECOLI   | * | P0A9A6 | P22333 | <a href="#">ftsz_ecoli</a>  | <a href="#">add_ecoli</a>   |
| P22333 | ADD_ECOLI   | * | P0AES4 | P22333 | <a href="#">gyra_ecoli</a>  | <a href="#">add_ecoli</a>   |
| P22333 | ADD_ECOLI   | * | P0C054 | P22333 | <a href="#">ibpa_ecoli</a>  | <a href="#">add_ecoli</a>   |
| P22333 | ADD_ECOLI   | * | P0C058 | P22333 | <a href="#">ibpb_ecoli</a>  | <a href="#">add_ecoli</a>   |
| P22333 | ADD_ECOLI   | * | P0A9X4 | P22333 | <a href="#">mreb_ecoli</a>  | <a href="#">add_ecoli</a>   |
| P22333 | ADD_ECOLI   | * | P69405 | P22333 | <a href="#">rcsa_ecoli</a>  | <a href="#">add_ecoli</a>   |
| P22333 | ADD_ECOLI   | * | P0AA25 | P22333 | <a href="#">thio_ecoli</a>  | <a href="#">add_ecoli</a>   |
| P0A9Q7 | ADHE_ECOLI  |   | P77488 | P0A9Q7 | <a href="#">dxs_ecoli</a>   | <a href="#">adhe_ecoli</a>  |
| P0A9Q7 | ADHE_ECOLI  |   | P0A6W5 | P0A9Q7 | <a href="#">grea_ecoli</a>  | <a href="#">adhe_ecoli</a>  |
| P0A9Q7 | ADHE_ECOLI  | * | P0AG20 | P0A9Q7 | <a href="#">rela_ecoli</a>  | <a href="#">adhe_ecoli</a>  |
| P0A9Q7 | ADHE_ECOLI  |   | P0AG40 | P0A9Q7 | <a href="#">ribf_ecoli</a>  | <a href="#">adhe_ecoli</a>  |
| P0A9Q7 | ADHE_ECOLI  | * | P0A812 | P0A9Q7 | <a href="#">ruvb_ecoli</a>  | <a href="#">adhe_ecoli</a>  |
| P0A9Q7 | ADHE_ECOLI  | * | P0AGD7 | P0A9Q7 | <a href="#">srp54_ecoli</a> | <a href="#">adhe_ecoli</a>  |
| P0A9Q7 | ADHE_ECOLI  | * | P0A8N5 | P0A9Q7 | <a href="#">syk2_ecoli</a>  | <a href="#">adhe_ecoli</a>  |

|        |            |   |        |        |             |            |
|--------|------------|---|--------|--------|-------------|------------|
| P0A9Q7 | ADHE_ECOLI | * | P76017 | P0A9Q7 | ycgv_ecoli  | adhe_ecoli |
| P19926 | AGP_ECOLI  |   | none   |        |             |            |
| P0AE08 | AHPC_ECOLI | * | P0A6A3 | P0AE08 | acka_ecoli  | ahpc_ecoli |
| P0AE08 | AHPC_ECOLI | * | P77624 | P0AE08 | arcm_ecoli  | ahpc_ecoli |
| P0AE08 | AHPC_ECOLI |   | P0A6H1 | P0AE08 | clpx_ecoli  | ahpc_ecoli |
| P0AE08 | AHPC_ECOLI | * | P32177 | P0AE08 | fdhd_ecoli  | ahpc_ecoli |
| P0AE08 | AHPC_ECOLI | * | P0AEN1 | P0AE08 | fre_ecoli   | ahpc_ecoli |
| P0AE08 | AHPC_ECOLI | * | P0A6S7 | P0AE08 | gpda_ecoli  | ahpc_ecoli |
| P0AE08 | AHPC_ECOLI |   | P06988 | P0AE08 | hisx_ecoli  | ahpc_ecoli |
| P0AE08 | AHPC_ECOLI |   | P34749 | P0AE08 | hofq_ecoli  | ahpc_ecoli |
| P0AE08 | AHPC_ECOLI |   | P0A6Z1 | P0AE08 | hsca_ecoli  | ahpc_ecoli |
| P0AE08 | AHPC_ECOLI | * | P30147 | P0AE08 | hyi_ecoli   | ahpc_ecoli |
| P0AE08 | AHPC_ECOLI | * | P0AAN9 | P0AE08 | irap_ecoli  | ahpc_ecoli |
| P0AE08 | AHPC_ECOLI | * | P0ADV1 | P0AE08 | lpta_ecoli  | ahpc_ecoli |
| P0AE08 | AHPC_ECOLI | * | P37677 | P0AE08 | lyxk_ecoli  | ahpc_ecoli |
| P0AE08 | AHPC_ECOLI | * | P76346 | P0AE08 | mtfa_ecoli  | ahpc_ecoli |
| P0AE08 | AHPC_ECOLI | * | P0A752 | P0AE08 | nadd_ecoli  | ahpc_ecoli |
| P0AE08 | AHPC_ECOLI | * | P77788 | P0AE08 | nudg_ecoli  | ahpc_ecoli |
| P0AE08 | AHPC_ECOLI | * | P37128 | P0AE08 | nudk_ecoli  | ahpc_ecoli |
| P0AE08 | AHPC_ECOLI | * | P05459 | P0AE08 | pdx_b_ecoli | ahpc_ecoli |
| P0AE08 | AHPC_ECOLI | * | Q46920 | P0AE08 | quef_ecoli  | ahpc_ecoli |
| P0AE08 | AHPC_ECOLI | * | P0AAQ6 | P0AE08 | ybaa_ecoli  | ahpc_ecoli |
| P0AE08 | AHPC_ECOLI | * | P0ACU0 | P0AE08 | ybih_ecoli  | ahpc_ecoli |
| P0AE08 | AHPC_ECOLI | * | P0A6G3 | P0AE08 | ygad_ecoli  | ahpc_ecoli |
| P0AE08 | AHPC_ECOLI | * | P0A8H6 | P0AE08 | yihi_ecoli  | ahpc_ecoli |
| P0AE08 | AHPC_ECOLI | * | P32141 | P0AE08 | yiht_ecoli  | ahpc_ecoli |
| P35340 | AHPF_ECOLI | * | P00561 | P35340 | ak1h_ecoli  | ahpf_ecoli |
| P35340 | AHPF_ECOLI | * | P32719 | P35340 | alse_ecoli  | ahpf_ecoli |
| P35340 | AHPF_ECOLI | * | P05052 | P35340 | appy_ecoli  | ahpf_ecoli |
| P35340 | AHPF_ECOLI | * | P00968 | P35340 | carb_ecoli  | ahpf_ecoli |
| P35340 | AHPF_ECOLI | * | P10805 | P35340 | envy_ecoli  | ahpf_ecoli |
| P35340 | AHPF_ECOLI | * | P24205 | P35340 | msbb_ecoli  | ahpf_ecoli |
| P35340 | AHPF_ECOLI | * | P04391 | P35340 | otc1_ecoli  | ahpf_ecoli |
| P35340 | AHPF_ECOLI | * | P06960 | P35340 | otc2_ecoli  | ahpf_ecoli |
| P35340 | AHPF_ECOLI | * | P37906 | P35340 | puub_ecoli  | ahpf_ecoli |
| P35340 | AHPF_ECOLI | * | P0A8R0 | P35340 | rraa_ecoli  | ahpf_ecoli |
| P35340 | AHPF_ECOLI | * | P07604 | P35340 | tyrr_ecoli  | ahpf_ecoli |
| P35340 | AHPF_ECOLI |   | P39177 | P35340 | uspg_ecoli  | ahpf_ecoli |
| P35340 | AHPF_ECOLI | * | P0AED5 | P35340 | uvry_ecoli  | ahpf_ecoli |
| P35340 | AHPF_ECOLI | * | P77169 | P35340 | yagj_ecoli  | ahpf_ecoli |
| P35340 | AHPF_ECOLI |   | P77657 | P35340 | yagk_ecoli  | ahpf_ecoli |
| P35340 | AHPF_ECOLI |   | P39831 | P35340 | ydfg_ecoli  | ahpf_ecoli |

|        |            |   |        |        |            |            |
|--------|------------|---|--------|--------|------------|------------|
| P35340 | AHPF_ECOLI |   | P76318 | P35340 | yedk_ecoli | ahpf_ecoli |
| P35340 | AHPF_ECOLI | * | P0A8D6 | P35340 | ymdb_ecoli | ahpf_ecoli |
| Q03155 | AIDA_ECOLX |   | none   |        |            |            |
| P33224 | AIDB_ECOLI | * | P0A6A8 | P33224 | acp_ecoli  | aidb_ecoli |
| P33224 | AIDB_ECOLI | * | P0A6A8 | P33224 | acp_ecoli  | aidb_ecoli |
| P33224 | AIDB_ECOLI | * | P36659 | P33224 | cbpa_ecoli | aidb_ecoli |
| P33224 | AIDB_ECOLI | * | P0A9Y6 | P33224 | cspc_ecoli | aidb_ecoli |
| P33224 | AIDB_ECOLI | * | P0A9Y6 | P33224 | cspc_ecoli | aidb_ecoli |
| P33224 | AIDB_ECOLI |   | P61949 | P33224 | flav_ecoli | aidb_ecoli |
| P33224 | AIDB_ECOLI | * | P0A6X3 | P33224 | hfq_ecoli  | aidb_ecoli |
| P33224 | AIDB_ECOLI | * | P77756 | P33224 | quec_ecoli | aidb_ecoli |
| P33224 | AIDB_ECOLI | * | P37765 | P33224 | rlub_ecoli | aidb_ecoli |
| P33224 | AIDB_ECOLI | * | P0AA39 | P33224 | rluc_ecoli | aidb_ecoli |
| P33224 | AIDB_ECOLI |   | P0A832 | P33224 | ssrp_ecoli | aidb_ecoli |
| P33224 | AIDB_ECOLI | * | P0AAS7 | P33224 | ybcj_ecoli | aidb_ecoli |
| P00561 | AK1H_ECOLI | * | P36995 | P00561 | cspb_ecoli | ak1h_ecoli |
| P00561 | AK1H_ECOLI | * | P0ACB0 | P00561 | dnab_ecoli | ak1h_ecoli |
| P00561 | AK1H_ECOLI | * | P0A6H5 | P00561 | hslu_ecoli | ak1h_ecoli |
| P00561 | AK1H_ECOLI | * | P0A850 | P00561 | tig_ecoli  | ak1h_ecoli |
| P08660 | AK3_ECOLI  |   | none   |        |            |            |
| P0AB71 | ALF_ECOLI  | * | P62707 | P0AB71 | gpma_ecoli | alf_ecoli  |
| P0AB71 | ALF_ECOLI  |   | P0AA25 | P0AB71 | thio_ecoli | alf_ecoli  |
| P0A991 | ALF1_ECOLI | * | P42641 | P0A991 | obg_ecoli  | alf1_ecoli |
| P0A955 | ALKH_ECOLI | * | P32053 | P0A955 | inta_ecoli | alkh_ecoli |
| P77425 | ALLC_ECOLI | * | P07363 | P77425 | chea_ecoli | allc_ecoli |
| P77425 | ALLC_ECOLI | * | P10805 | P77425 | envy_ecoli | allc_ecoli |
| P77425 | ALLC_ECOLI | * | Q47208 | P77425 | fdra_ecoli | allc_ecoli |
| P0ACN4 | ALLR_ECOLI | * | P30749 | P0ACN4 | moae_ecoli | allr_ecoli |
| P0ACN4 | ALLR_ECOLI | * | P00956 | P0ACN4 | syj_ecoli  | allr_ecoli |
| P36548 | AMIA_ECOLI | * | P0A9F1 | P36548 | mntr_ecoli | amia_ecoli |
| P36548 | AMIA_ECOLI | * | P19318 | P36548 | nary_ecoli | amia_ecoli |
| P36548 | AMIA_ECOLI | * | P0A794 | P36548 | pdxj_ecoli | amia_ecoli |
| P36548 | AMIA_ECOLI | * | P09377 | P36548 | rhas_ecoli | amia_ecoli |
| P36548 | AMIA_ECOLI |   | P0AG67 | P36548 | rs1_ecoli  | amia_ecoli |
| P36548 | AMIA_ECOLI | * | P0ADZ4 | P36548 | rs15_ecoli | amia_ecoli |

|        |            |          |        |            |            |
|--------|------------|----------|--------|------------|------------|
| P36548 | AMIA_ECOLI | * P76108 | P36548 | ydcx_ecoli | amia_ecoli |
| P63883 | AMIC_ECOLI | * P29131 | P63883 | ftsn_ecoli | amic_ecoli |
| P63883 | AMIC_ECOLI | P02919-2 | P63883 | P02919-2   | amic_ecoli |
| P0AE12 | AMN_ECOLI  | P36562   | P0AE12 | cobt_ecoli | amn_ecoli  |
| P0AE12 | AMN_ECOLI  | P0AED9   | P0AE12 | dcm_ecoli  | amn_ecoli  |
| P68767 | AMPA_ECOLI | P00363   | P68767 | frda_ecoli | ampa_ecoli |
| P68767 | AMPA_ECOLI | P04391   | P68767 | otc1_ecoli | ampa_ecoli |
| P13016 | AMPD_ECOLI | none     |        |            |            |
| P0AD70 | AMPH_ECOLI | none     |        |            |            |
| P0AE18 | AMPM_ECOLI | * P0A921 | P0AE18 | pa1_ecoli  | ampm_ecoli |
| P0AE18 | AMPM_ECOLI | * P07813 | P0AE18 | syl_ecoli  | ampm_ecoli |
| P0AE18 | AMPM_ECOLI | * P00954 | P0AE18 | syw_ecoli  | ampm_ecoli |
| P04825 | AMPN_ECOLI | * P77399 | P04825 | fadj_ecoli | ampn_ecoli |
| P04825 | AMPN_ECOLI | * P19318 | P04825 | nary_ecoli | ampn_ecoli |
| P04825 | AMPN_ECOLI | * P0A7M6 | P04825 | rl29_ecoli | ampn_ecoli |
| P04825 | AMPN_ECOLI | * P03018 | P04825 | uvrd_ecoli | ampn_ecoli |
| P62672 | APAG_ECOLI | none     |        |            |            |
| P69503 | APT_ECOLI  | * P0A6J8 | P69503 | ddla_ecoli | apt_ecoli  |
| P69503 | APT_ECOLI  | * P0A6M8 | P69503 | efg_ecoli  | apt_ecoli  |
| P0A9Q1 | ARCA_ECOLI | none     |        |            |            |
| P0A6C8 | ARGB_ECOLI | none     |        |            |            |
| P77690 | ARNB_ECOLI | none     |        |            |            |
| P07639 | AROB_ECOLI | P0A6M8   | P07639 | efg_ecoli  | arob_ecoli |
| P07639 | AROB_ECOLI | * P0A6Y1 | P07639 | ihfb_ecoli | arob_ecoli |
| P15770 | AROE_ECOLI | none     |        |            |            |
| P0A6D7 | AROK_ECOLI | P76256   | P0A6D7 | yeaz_ecoli | arok_ecoli |
| P0AE28 | AROM_ECOLI | none     |        |            |            |
| P76205 | ARPB_ECOLI | * P0AAB6 | P76205 | galf_ecoli | arpb_ecoli |

|        |             |          |        |             |             |
|--------|-------------|----------|--------|-------------|-------------|
| P76205 | ARPB_ECOLI  | * P0A953 | P0AB93 | fabb_ecoli  | arsb_ecoli  |
| P00963 | ASNA_ECOLI  | * P23871 | P00963 | hemh_ecoli  | asna_ecoli  |
| P00963 | ASNA_ECOLI  | * P61320 | P00963 | lolb_ecoli  | asna_ecoli  |
| POACI6 | ASNC_ECOLI  | none     |        |             |             |
| P00805 | ASPG2_ECOLI | * P25553 | P00805 | alda_ecoli  | aspg2_ecoli |
| P00805 | ASPG2_ECOLI | * P61320 | P00805 | lolb_ecoli  | aspg2_ecoli |
| P36560 | ASR_ECOLI   | P0A6P1   | P36560 | efts_ecoli  | asr_ecoli   |
| POABB0 | ATPA_ECOLI  | P0ABB4   | POABB0 | atpb_ecoli  | atpa_ecoli  |
| POABB0 | ATPA_ECOLI  | P0ABB4   | POABB0 | atpb_ecoli  | atpa_ecoli  |
| POABB0 | ATPA_ECOLI  | * P0ABA4 | POABB0 | atpd_ecoli  | atpa_ecoli  |
| POABB0 | ATPA_ECOLI  | * P0ABA6 | POABB0 | atpg_ecoli  | atpa_ecoli  |
| POABB0 | ATPA_ECOLI  | * P0ABA6 | POABB0 | atpg_ecoli  | atpa_ecoli  |
| POABB0 | ATPA_ECOLI  | * P0AF24 | POABB0 | nagd_ecoli  | atpa_ecoli  |
| POABB0 | ATPA_ECOLI  | * P0AA25 | POABB0 | thio_ecoli  | atpa_ecoli  |
| POABB0 | ATPA_ECOLI  | * P39177 | POABB0 | uspg_ecoli  | atpa_ecoli  |
| POABB0 | ATPA_ECOLI  | P0AAN5   | POABB0 | yaia_ecoli  | atpa_ecoli  |
| POABB0 | ATPA_ECOLI  | * P37325 | POABB0 | ybch_ecoli  | atpa_ecoli  |
| POABB4 | ATPB_ECOLI  | * P0ABB0 | POABB4 | atpa_ecoli  | atpb_ecoli  |
| POABB4 | ATPB_ECOLI  | P0ABB0   | POABB4 | atpa_ecoli  | atpb_ecoli  |
| POABB4 | ATPB_ECOLI  | P0ABB0   | POABB4 | atpa_ecoli  | atpb_ecoli  |
| POABB4 | ATPB_ECOLI  | P0ABB0   | POABB4 | atpa_ecoli  | atpb_ecoli  |
| POABB4 | ATPB_ECOLI  | * P0ABB0 | POABB4 | atpa_ecoli  | atpb_ecoli  |
| POABB4 | ATPB_ECOLI  | * P0ABA4 | POABB4 | atpd_ecoli  | atpb_ecoli  |
| POABB4 | ATPB_ECOLI  | * P0ABA6 | POABB4 | atpg_ecoli  | atpb_ecoli  |
| POABB4 | ATPB_ECOLI  | * P0A964 | POABB4 | chew_ecoli  | atpb_ecoli  |
| POABB4 | ATPB_ECOLI  | * P0A9H9 | POABB4 | chez_ecoli  | atpb_ecoli  |
| POABB4 | ATPB_ECOLI  | P08622   | POABB4 | dnaj_ecoli  | atpb_ecoli  |
| POABB4 | ATPB_ECOLI  | * P0AEN1 | POABB4 | fre_ecoli   | atpb_ecoli  |
| POABB4 | ATPB_ECOLI  | * P0AAB6 | POABB4 | galf_ecoli  | atpb_ecoli  |
| POABB4 | ATPB_ECOLI  | * P0A6W5 | POABB4 | grea_ecoli  | atpb_ecoli  |
| POABB4 | ATPB_ECOLI  | * P15038 | POABB4 | held_ecoli  | atpb_ecoli  |
| POABB4 | ATPB_ECOLI  | * P0C054 | POABB4 | ibpa_ecoli  | atpb_ecoli  |
| POABB4 | ATPB_ECOLI  | * P0A9X4 | POABB4 | mreb_ecoli  | atpb_ecoli  |
| POABB4 | ATPB_ECOLI  | * P42909 | POABB4 | ptpb1_ecoli | atpb_ecoli  |
| POABB4 | ATPB_ECOLI  | * P0A7J0 | POABB4 | ribb_ecoli  | atpb_ecoli  |
| POABB4 | ATPB_ECOLI  | * P0A8V2 | POABB4 | rpob_ecoli  | atpb_ecoli  |
| POABB4 | ATPB_ECOLI  | * P0AA25 | POABB4 | thio_ecoli  | atpb_ecoli  |
| POABB4 | ATPB_ECOLI  | * P0AA25 | POABB4 | thio_ecoli  | atpb_ecoli  |
| POABB4 | ATPB_ECOLI  | * P0AB43 | POABB4 | ycgl_ecoli  | atpb_ecoli  |

|        |            |          |        |            |            |
|--------|------------|----------|--------|------------|------------|
| P0ABB4 | ATPB_ECOLI | * P0AD10 | P0ABB4 | yecj_ecoli | atpb_ecoli |
| P0ABB4 | ATPB_ECOLI | * P0A8A2 | P0ABB4 | yeen_ecoli | atpb_ecoli |
| P0ABB4 | ATPB_ECOLI | * P33941 | P0ABB4 | yoji_ecoli | atpb_ecoli |
| P0ABA0 | ATPF_ECOLI | * P0ABB0 | P0ABA0 | atpa_ecoli | atpf_ecoli |
| P0ABA0 | ATPF_ECOLI | * P21437 | P0ABA0 | yggf_ecoli | atpf_ecoli |
| P0ABA6 | ATPG_ECOLI | * P0ABB0 | P0ABA6 | atpa_ecoli | atpg_ecoli |
| P0ABA6 | ATPG_ECOLI | * P0ABB0 | P0ABA6 | atpa_ecoli | atpg_ecoli |
| P0ABA6 | ATPG_ECOLI | * P0A9X9 | P0ABA6 | cspa_ecoli | atpg_ecoli |
| P0ABA6 | ATPG_ECOLI | * P24171 | P0ABA6 | dcp_ecoli  | atpg_ecoli |
| P0ABA6 | ATPG_ECOLI | * P0ACB4 | P0ABA6 | hemg_ecoli | atpg_ecoli |
| P0ABA6 | ATPG_ECOLI | * P0ACC1 | P0ABA6 | hemk_ecoli | atpg_ecoli |
| P0ABA6 | ATPG_ECOLI | * P0ACE7 | P0ABA6 | hint_ecoli | atpg_ecoli |
| P0ABA6 | ATPG_ECOLI | * P0A9F9 | P0ABA6 | metr_ecoli | atpg_ecoli |
| P68699 | ATPL_ECOLI | * P0ABB0 | P68699 | atpa_ecoli | atpl_ecoli |
| P68699 | ATPL_ECOLI | * P0AB18 | P68699 | tuse_ecoli | atpl_ecoli |
| P37617 | ATZN_ECOLI | * P0AGK4 | P37617 | yhby_ecoli | atzn_ecoli |
| P41407 | AZOR_ECOLI | none     |        |            |            |
| P30847 | BAES_ECOLI | * P23909 | P30847 | muts_ecoli | baes_ecoli |
| P30847 | BAES_ECOLI | * P41409 | P30847 | riha_ecoli | baes_ecoli |
| P30847 | BAES_ECOLI | * P36928 | P30847 | yegd_ecoli | baes_ecoli |
| P30843 | BASR_ECOLI | none     |        |            |            |
| P0AE52 | BCP_ECOLI  | none     |        |            |            |
| P37652 | BCSB_ECOLI | * P77432 | P37652 | lsrk_ecoli | bcsb_ecoli |
| P37652 | BCSB_ECOLI | * P00957 | P37652 | sya_ecoli  | bcsb_ecoli |
| P37652 | BCSB_ECOLI | * P0A8L1 | P37652 | sys_ecoli  | bcsb_ecoli |
| P37652 | BCSB_ECOLI | * P76464 | P37652 | yfas_ecoli | bcsb_ecoli |
| P17445 | BETB_ECOLI | * P17446 | P17445 | beti_ecoli | betb_ecoli |
| P0ABD3 | BFR_ECOLI  | none     |        |            |            |
| P06864 | BGA2_ECOLI | * P32053 | P06864 | inta_ecoli | bga2_ecoli |
| Q46829 | BGLA_ECOLI | * P0A6C5 | Q46829 | arga_ecoli | bgla_ecoli |
| Q46829 | BGLA_ECOLI | * P0A9P6 | Q46829 | dead_ecoli | bgla_ecoli |
| Q46829 | BGLA_ECOLI | * P27248 | Q46829 | gcst_ecoli | bgla_ecoli |



|        |             |          |        |                            |                            |
|--------|-------------|----------|--------|----------------------------|----------------------------|
| P12995 | BIOA_ECOLI  | * P0A8N3 | P12995 | <a href="#">syk1_ecoli</a> | <a href="#">bioa_ecoli</a> |
| P12996 | BIOB_ECOLI  | * P10408 | P12996 | <a href="#">seca_ecoli</a> | <a href="#">biob_ecoli</a> |
| P0A6E9 | BIOD2_ECOLI | none     |        |                            |                            |
| P13001 | BIOH_ECOLI  | * P0A8T1 | P13001 | <a href="#">prma_ecoli</a> | <a href="#">bioh_ecoli</a> |
| P06610 | BTUE_ECOLI  | * P42641 | P06610 | <a href="#">obg_ecoli</a>  | <a href="#">btue_ecoli</a> |
| P06610 | BTUE_ECOLI  | * P10442 | P06610 | <a href="#">rnh2_ecoli</a> | <a href="#">btue_ecoli</a> |
| P0AAE8 | CADB_ECOLI  | * P0A7E9 | P0AAE8 | <a href="#">pyrh_ecoli</a> | <a href="#">cadb_ecoli</a> |
| P0AAE8 | CADB_ECOLI  | * P0AAZ4 | P0AAE8 | <a href="#">rara_ecoli</a> | <a href="#">cadb_ecoli</a> |
| P31572 | CAIB_ECOLI  | * P05052 | P31572 | <a href="#">appy_ecoli</a> | <a href="#">caib_ecoli</a> |
| P31572 | CAIB_ECOLI  | * P0AE37 | P31572 | <a href="#">asta_ecoli</a> | <a href="#">caib_ecoli</a> |
| P31572 | CAIB_ECOLI  | * P0A6I6 | P31572 | <a href="#">coad_ecoli</a> | <a href="#">caib_ecoli</a> |
| P31572 | CAIB_ECOLI  | * P68644 | P31572 | <a href="#">fixc_ecoli</a> | <a href="#">caib_ecoli</a> |
| P31572 | CAIB_ECOLI  | * P37595 | P31572 | <a href="#">iaaa_ecoli</a> | <a href="#">caib_ecoli</a> |
| P31572 | CAIB_ECOLI  | * P75794 | P31572 | <a href="#">pfle_ecoli</a> | <a href="#">caib_ecoli</a> |
| P31572 | CAIB_ECOLI  | * P39902 | P31572 | <a href="#">sprt_ecoli</a> | <a href="#">caib_ecoli</a> |
| P21179 | CATE_ECOLI  | * P0AEG4 | P21179 | <a href="#">dsba_ecoli</a> | <a href="#">cate_ecoli</a> |
| P21179 | CATE_ECOLI  | * P0A8N5 | P21179 | <a href="#">syk2_ecoli</a> | <a href="#">cate_ecoli</a> |
| P36659 | CBPA_ECOLI  | * P18335 | P36659 | <a href="#">argd_ecoli</a> | <a href="#">cbpa_ecoli</a> |
| P36659 | CBPA_ECOLI  | * P21645 | P36659 | <a href="#">lpxd_ecoli</a> | <a href="#">cbpa_ecoli</a> |
| P36659 | CBPA_ECOLI  | * P21645 | P36659 | <a href="#">lpxd_ecoli</a> | <a href="#">cbpa_ecoli</a> |
| P36659 | CBPA_ECOLI  | * P0A850 | P36659 | <a href="#">tig_ecoli</a>  | <a href="#">cbpa_ecoli</a> |
| P0ABF6 | CDD_ECOLI   | * P0A9R7 | P0ABF6 | <a href="#">ftse_ecoli</a> | <a href="#">cdd_ecoli</a>  |
| P06282 | CDH_ECOLI   | * P0AAB6 | P06282 | <a href="#">galf_ecoli</a> | <a href="#">cdh_ecoli</a>  |
| P04419 | CEA2_ECOLX  |          |        |                            |                            |
| P00646 | CEA3_ECOLX  | * P06129 | P00646 | <a href="#">btub_ecoli</a> | <a href="#">cea3_ecolx</a> |
| P17999 | CEA6_ECOLX  |          |        |                            |                            |
| P09883 | CEA9_ECOLX  |          |        |                            |                            |
| P05819 | CEAB_ECOLX  | none     |        |                            |                            |



|        |            |   |        |        |            |            |
|--------|------------|---|--------|--------|------------|------------|
| P17998 | CEAD_ECOLX | * | P11899 | P17998 | immd_ecoli | cead_ecolx |
| P17998 | CEAD_ECOLX | * | P11899 | P17998 | immd_ecoli | cead_ecolx |
| POA9H7 | CFA_ECOLI  |   | none   |        |            |            |
| P25733 | CFAC_ECOLX |   | none   |        |            |            |
| POA6F9 | CH10_ECOLI | * | P28248 | POA6F9 | dcd_ecoli  | ch10_ecoli |
| POA6F9 | CH10_ECOLI | * | P0AA25 | POA6F9 | thio_ecoli | ch10_ecoli |
| POA6F5 | CH60_ECOLI | * | P31119 | POA6F5 | aas_ecoli  | ch60_ecoli |
| POA6F5 | CH60_ECOLI | * | P76052 | POA6F5 | abgb_ecoli | ch60_ecoli |
| POA6F5 | CH60_ECOLI | * | P77744 | POA6F5 | abgr_ecoli | ch60_ecoli |
| POA6F5 | CH60_ECOLI | * | P0ABD5 | POA6F5 | acca_ecoli | ch60_ecoli |
| POA6F5 | CH60_ECOLI | * | P11071 | POA6F5 | acek_ecoli | ch60_ecoli |
| POA6F5 | CH60_ECOLI | * | P21515 | POA6F5 | acph_ecoli | ch60_ecoli |
| POA6F5 | CH60_ECOLI | * | P24224 | POA6F5 | acps_ecoli | ch60_ecoli |
| POA6F5 | CH60_ECOLI | * | P33234 | POA6F5 | adiy_ecoli | ch60_ecoli |
| POA6F5 | CH60_ECOLI | * | P50466 | POA6F5 | aer_ecoli  | ch60_ecoli |
| POA6F5 | CH60_ECOLI | * | P23872 | POA6F5 | aes_ecoli  | ch60_ecoli |
| POA6F5 | CH60_ECOLI | * | P42912 | POA6F5 | agai_ecoli | ch60_ecoli |
| POA6F5 | CH60_ECOLI | * | P33224 | POA6F5 | aidb_ecoli | ch60_ecoli |
| POA6F5 | CH60_ECOLI | * | P33224 | POA6F5 | aidb_ecoli | ch60_ecoli |
| POA6F5 | CH60_ECOLI | * | P05050 | POA6F5 | alkb_ecoli | ch60_ecoli |
| POA6F5 | CH60_ECOLI | * | P0A955 | POA6F5 | alkh_ecoli | ch60_ecoli |
| POA6F5 | CH60_ECOLI | * | P77555 | POA6F5 | alld_ecoli | ch60_ecoli |
| POA6F5 | CH60_ECOLI | * | P0ACR0 | POA6F5 | alls_ecoli | ch60_ecoli |
| POA6F5 | CH60_ECOLI | * | P32721 | POA6F5 | alsa_ecoli | ch60_ecoli |
| POA6F5 | CH60_ECOLI | * | P0AE12 | POA6F5 | amn_ecoli  | ch60_ecoli |
| POA6F5 | CH60_ECOLI | * | P04825 | POA6F5 | ampn_ecoli | ch60_ecoli |
| POA6F5 | CH60_ECOLI | * | P77570 | POA6F5 | anmk_ecoli | ch60_ecoli |
| POA6F5 | CH60_ECOLI | * | P0A9E0 | POA6F5 | arac_ecoli | ch60_ecoli |
| POA6F5 | CH60_ECOLI | * | P77624 | POA6F5 | arcm_ecoli | ch60_ecoli |
| POA6F5 | CH60_ECOLI | * | P0A6C5 | POA6F5 | arga_ecoli | ch60_ecoli |
| POA6F5 | CH60_ECOLI | * | P27254 | POA6F5 | argk_ecoli | ch60_ecoli |
| POA6F5 | CH60_ECOLI | * | P77398 | POA6F5 | arna_ecoli | ch60_ecoli |
| POA6F5 | CH60_ECOLI | * | P76472 | POA6F5 | arnd_ecoli | ch60_ecoli |
| POA6F5 | CH60_ECOLI | * | P07639 | POA6F5 | arob_ecoli | ch60_ecoli |
| POA6F5 | CH60_ECOLI | * | P00887 | POA6F5 | aroh_ecoli | ch60_ecoli |
| POA6F5 | CH60_ECOLI | * | P23325 | POA6F5 | arpa_ecoli | ch60_ecoli |
| POA6F5 | CH60_ECOLI | * | P0AAF6 | POA6F5 | artp_ecoli | ch60_ecoli |
| POA6F5 | CH60_ECOLI | * | P24240 | POA6F5 | ascb_ecoli | ch60_ecoli |
| POA6F5 | CH60_ECOLI | * | P0AE37 | POA6F5 | asta_ecoli | ch60_ecoli |
| POA6F5 | CH60_ECOLI | * | P76216 | POA6F5 | astb_ecoli | ch60_ecoli |
| POA6F5 | CH60_ECOLI | * | P77581 | POA6F5 | astc_ecoli | ch60_ecoli |

|        |            |          |        |            |            |
|--------|------------|----------|--------|------------|------------|
| POA6F5 | CH60_ECOLI | * P76215 | POA6F5 | aste_ecoli | ch60_ecoli |
| POA6F5 | CH60_ECOLI | * P76458 | POA6F5 | atod_ecoli | ch60_ecoli |
| POA6F5 | CH60_ECOLI | * P17444 | POA6F5 | beta_ecoli | ch60_ecoli |
| POA6F5 | CH60_ECOLI | * P11988 | POA6F5 | bglb_ecoli | ch60_ecoli |
| POA6F5 | CH60_ECOLI | * P12995 | POA6F5 | bioa_ecoli | ch60_ecoli |
| POA6F5 | CH60_ECOLI | * P12999 | POA6F5 | bioc_ecoli | ch60_ecoli |
| POA6F5 | CH60_ECOLI | * P13000 | POA6F5 | biod_ecoli | ch60_ecoli |
| POA6F5 | CH60_ECOLI | * P12998 | POA6F5 | biof_ecoli | ch60_ecoli |
| POA6F5 | CH60_ECOLI | * P13001 | POA6F5 | bioh_ecoli | ch60_ecoli |
| POA6F5 | CH60_ECOLI | * P06611 | POA6F5 | btud_ecoli | ch60_ecoli |
| POA6F5 | CH60_ECOLI | * P06610 | POA6F5 | btue_ecoli | ch60_ecoli |
| POA6F5 | CH60_ECOLI | * P77213 | POA6F5 | caal_ecoli | ch60_ecoli |
| POA6F5 | CH60_ECOLI | * P31551 | POA6F5 | caid_ecoli | ch60_ecoli |
| POA6F5 | CH60_ECOLI | * P61517 | POA6F5 | can_ecoli  | ch60_ecoli |
| POA6F5 | CH60_ECOLI | * P00968 | POA6F5 | carb_ecoli | ch60_ecoli |
| POA6F5 | CH60_ECOLI | * P21179 | POA6F5 | cate_ecoli | ch60_ecoli |
| POA6F5 | CH60_ECOLI | * P36659 | POA6F5 | cbpa_ecoli | ch60_ecoli |
| POA6F5 | CH60_ECOLI | * P37794 | POA6F5 | chbg_ecoli | ch60_ecoli |
| POA6F5 | CH60_ECOLI | * P17410 | POA6F5 | chbr_ecoli | ch60_ecoli |
| POA6F5 | CH60_ECOLI | * P07364 | POA6F5 | cher_ecoli | ch60_ecoli |
| POA6F5 | CH60_ECOLI | * P76213 | POA6F5 | cho_ecoli  | ch60_ecoli |
| POA6F5 | CH60_ECOLI | * P76213 | POA6F5 | cho_ecoli  | ch60_ecoli |
| POA6F5 | CH60_ECOLI | * P0ABH7 | POA6F5 | cisy_ecoli | ch60_ecoli |
| POA6F5 | CH60_ECOLI | * P77390 | POA6F5 | citc_ecoli | ch60_ecoli |
| POA6F5 | CH60_ECOLI | * P0A6G5 | POA6F5 | citx_ecoli | ch60_ecoli |
| POA6F5 | CH60_ECOLI | * P0A6G7 | POA6F5 | clpp_ecoli | ch60_ecoli |
| POA6F5 | CH60_ECOLI | * P0A6G7 | POA6F5 | clpp_ecoli | ch60_ecoli |
| POA6F5 | CH60_ECOLI | * P0A6G7 | POA6F5 | clpp_ecoli | ch60_ecoli |
| POA6F5 | CH60_ECOLI | * P0A6I3 | POA6F5 | coaa_ecoli | ch60_ecoli |
| POA6F5 | CH60_ECOLI | * P52086 | POA6F5 | cobc_ecoli | ch60_ecoli |
| POA6F5 | CH60_ECOLI | * P36562 | POA6F5 | cobt_ecoli | ch60_ecoli |
| POA6F5 | CH60_ECOLI | * P46891 | POA6F5 | cof_ecoli  | ch60_ecoli |
| POA6F5 | CH60_ECOLI | * Q59385 | POA6F5 | copa_ecoli | ch60_ecoli |
| POA6F5 | CH60_ECOLI | * Q46925 | POA6F5 | csda_ecoli | ch60_ecoli |
| POA6F5 | CH60_ECOLI | * P0ACZ8 | POA6F5 | cusr_ecoli | ch60_ecoli |
| POA6F5 | CH60_ECOLI | * P0ABJ1 | POA6F5 | cyoa_ecoli | ch60_ecoli |
| POA6F5 | CH60_ECOLI | * P16676 | POA6F5 | cysa_ecoli | ch60_ecoli |
| POA6F5 | CH60_ECOLI | * P21156 | POA6F5 | cysd_ecoli | ch60_ecoli |
| POA6F5 | CH60_ECOLI | * P17854 | POA6F5 | cysh_ecoli | ch60_ecoli |
| POA6F5 | CH60_ECOLI | * P0AED7 | POA6F5 | dape_ecoli | ch60_ecoli |
| POA6F5 | CH60_ECOLI | * P21693 | POA6F5 | dbpa_ecoli | ch60_ecoli |
| POA6F5 | CH60_ECOLI | * P69908 | POA6F5 | dcea_ecoli | ch60_ecoli |
| POA6F5 | CH60_ECOLI | * P69910 | POA6F5 | dceb_ecoli | ch60_ecoli |
| POA6F5 | CH60_ECOLI | * P52095 | POA6F5 | dclz_ecoli | ch60_ecoli |
| POA6F5 | CH60_ECOLI | * P0AED9 | POA6F5 | dcm_ecoli  | ch60_ecoli |

|        |            |          |        |                           |                            |
|--------|------------|----------|--------|---------------------------|----------------------------|
| POA6F5 | CH60_ECOLI | * P37195 | POA6F5 | dctr_ecoli                | ch60_ecoli                 |
| POA6F5 | CH60_ECOLI | * P0ACV2 | POA6F5 | ddg_ecoli                 | ch60_ecoli                 |
| POA6F5 | CH60_ECOLI | * P77268 | POA6F5 | ddpd_ecoli                | ch60_ecoli                 |
| POA6F5 | CH60_ECOLI | * P77622 | POA6F5 | ddpf_ecoli                | ch60_ecoli                 |
| POA6F5 | CH60_ECOLI | * P31459 | POA6F5 | dgok_ecoli                | ch60_ecoli                 |
| POA6F5 | CH60_ECOLI | * P15723 | POA6F5 | dgtp_ecoli                | ch60_ecoli                 |
| POA6F5 | CH60_ECOLI | * P15877 | POA6F5 | dhg_ecoli                 | ch60_ecoli                 |
| POA6F5 | CH60_ECOLI | * P07014 | POA6F5 | dhsb_ecoli                | ch60_ecoli                 |
| POA6F5 | CH60_ECOLI | * P77359 | POA6F5 | djlc_ecoli                | ch60_ecoli                 |
| POA6F5 | CH60_ECOLI | * P06149 | POA6F5 | dld_ecoli                 | ch60_ecoli                 |
| POA6F5 | CH60_ECOLI | * P0AEE8 | POA6F5 | <a href="#">dma_ecoli</a> | <a href="#">ch60_ecoli</a> |
| POA6F5 | CH60_ECOLI | * P76251 | POA6F5 | dmla_ecoli                | ch60_ecoli                 |
| POA6F5 | CH60_ECOLI | * P76250 | POA6F5 | dmlr_ecoli                | ch60_ecoli                 |
| POA6F5 | CH60_ECOLI | * P03004 | POA6F5 | dnaa_ecoli                | ch60_ecoli                 |
| POA6F5 | CH60_ECOLI | * P77510 | POA6F5 | dpib_ecoli                | ch60_ecoli                 |
| POA6F5 | CH60_ECOLI | * P37313 | POA6F5 | dppf_ecoli                | ch60_ecoli                 |
| POA6F5 | CH60_ECOLI | * P46068 | POA6F5 | dsdc_ecoli                | ch60_ecoli                 |
| POA6F5 | CH60_ECOLI | * P0ABT5 | POA6F5 | dusb_ecoli                | ch60_ecoli                 |
| POA6F5 | CH60_ECOLI | * P33371 | POA6F5 | dusc_ecoli                | ch60_ecoli                 |
| POA6F5 | CH60_ECOLI | * P45568 | POA6F5 | dxr_ecoli                 | ch60_ecoli                 |
| POA6F5 | CH60_ECOLI | * P0AC73 | POA6F5 | ebgc_ecoli                | ch60_ecoli                 |
| POA6F5 | CH60_ECOLI | * P0ADI4 | POA6F5 | entb_ecoli                | ch60_ecoli                 |
| POA6F5 | CH60_ECOLI | * P0AEJ2 | POA6F5 | entc_ecoli                | ch60_ecoli                 |
| POA6F5 | CH60_ECOLI | * P11454 | POA6F5 | entf_ecoli                | ch60_ecoli                 |
| POA6F5 | CH60_ECOLI | * P10805 | POA6F5 | envy_ecoli                | ch60_ecoli                 |
| POA6F5 | CH60_ECOLI | * P0AEJ6 | POA6F5 | eutb_ecoli                | ch60_ecoli                 |
| POA6F5 | CH60_ECOLI | * P76553 | POA6F5 | eutg_ecoli                | ch60_ecoli                 |
| POA6F5 | CH60_ECOLI | * P36547 | POA6F5 | eutr_ecoli                | ch60_ecoli                 |
| POA6F5 | CH60_ECOLI | * P76503 | POA6F5 | fadi_ecoli                | ch60_ecoli                 |
| POA6F5 | CH60_ECOLI | * P37009 | POA6F5 | fbpc_ecoli                | ch60_ecoli                 |
| POA6F5 | CH60_ECOLI | * P32055 | POA6F5 | fcl_ecoli                 | ch60_ecoli                 |
| POA6F5 | CH60_ECOLI | * P32177 | POA6F5 | fdhd_ecoli                | ch60_ecoli                 |
| POA6F5 | CH60_ECOLI | * P07658 | POA6F5 | fdhf_ecoli                | ch60_ecoli                 |
| POA6F5 | CH60_ECOLI | * P0AAJ3 | POA6F5 | fdnh_ecoli                | ch60_ecoli                 |
| POA6F5 | CH60_ECOLI | * Q47129 | POA6F5 | fear_ecoli                | ch60_ecoli                 |
| POA6F5 | CH60_ECOLI | * P15031 | POA6F5 | fece_ecoli                | ch60_ecoli                 |
| POA6F5 | CH60_ECOLI | * P23485 | POA6F5 | fecr_ecoli                | ch60_ecoli                 |
| POA6F5 | CH60_ECOLI | * P0AEL6 | POA6F5 | fepb_ecoli                | ch60_ecoli                 |
| POA6F5 | CH60_ECOLI | * P23878 | POA6F5 | fepc_ecoli                | ch60_ecoli                 |
| POA6F5 | CH60_ECOLI | * P13039 | POA6F5 | fes_ecoli                 | ch60_ecoli                 |
| POA6F5 | CH60_ECOLI | * P19323 | POA6F5 | fhla_ecoli                | ch60_ecoli                 |
| POA6F5 | CH60_ECOLI | * P30130 | POA6F5 | fimd_ecoli                | ch60_ecoli                 |
| POA6F5 | CH60_ECOLI | * P31574 | POA6F5 | fixb_ecoli                | ch60_ecoli                 |
| POA6F5 | CH60_ECOLI | * P68644 | POA6F5 | fixc_ecoli                | ch60_ecoli                 |
| POA6F5 | CH60_ECOLI | * P31068 | POA6F5 | flih_ecoli                | ch60_ecoli                 |

|        |            |          |        |                            |                            |
|--------|------------|----------|--------|----------------------------|----------------------------|
| POA6F5 | CH60_ECOLI | * P52612 | POA6F5 | flii_ecoli                 | ch60_ecoli                 |
| POA6F5 | CH60_ECOLI | * P06974 | POA6F5 | flim_ecoli                 | ch60_ecoli                 |
| POA6F5 | CH60_ECOLI | * POAEM9 | POA6F5 | fliy_ecoli                 | ch60_ecoli                 |
| POA6F5 | CH60_ECOLI | * P52627 | POA6F5 | fliz_ecoli                 | ch60_ecoli                 |
| POA6F5 | CH60_ECOLI | * P24186 | POA6F5 | fold_ecoli                 | ch60_ecoli                 |
| POA6F5 | CH60_ECOLI | * P45543 | POA6F5 | frld_ecoli                 | ch60_ecoli                 |
| POA6F5 | CH60_ECOLI | * P04335 | POA6F5 | frsa_ecoli                 | ch60_ecoli                 |
| POA6F5 | CH60_ECOLI | * P0ACP1 | POA6F5 | frur_ecoli                 | ch60_ecoli                 |
| POA6F5 | CH60_ECOLI | * P32152 | POA6F5 | frvr_ecoli                 | ch60_ecoli                 |
| POA6F5 | CH60_ECOLI | * P0A9R7 | POA6F5 | ftse_ecoli                 | ch60_ecoli                 |
| POA6F5 | CH60_ECOLI | * P0A9R7 | POA6F5 | ftse_ecoli                 | ch60_ecoli                 |
| POA6F5 | CH60_ECOLI | * P0A9R7 | POA6F5 | ftse_ecoli                 | ch60_ecoli                 |
| POA6F5 | CH60_ECOLI | * P11553 | POA6F5 | fuck_ecoli                 | ch60_ecoli                 |
| POA6F5 | CH60_ECOLI | * P25526 | POA6F5 | gabd_ecoli                 | ch60_ecoli                 |
| POA6F5 | CH60_ECOLI | * P63201 | POA6F5 | gadw_ecoli                 | ch60_ecoli                 |
| POA6F5 | CH60_ECOLI | * P37639 | POA6F5 | <a href="#">gadx_ecoli</a> | <a href="#">ch60_ecoli</a> |
| POA6F5 | CH60_ECOLI | * P0AAB6 | POA6F5 | <a href="#">galf_ecoli</a> | <a href="#">ch60_ecoli</a> |
| POA6F5 | CH60_ECOLI | * P25748 | POA6F5 | gals_ecoli                 | ch60_ecoli                 |
| POA6F5 | CH60_ECOLI | * P0A9S3 | POA6F5 | <a href="#">gatd_ecoli</a> | <a href="#">ch60_ecoli</a> |
| POA6F5 | CH60_ECOLI | * P36930 | POA6F5 | gatr_ecoli                 | ch60_ecoli                 |
| POA6F5 | CH60_ECOLI | * P0C8J8 | POA6F5 | <a href="#">gatz_ecoli</a> | <a href="#">ch60_ecoli</a> |
| POA6F5 | CH60_ECOLI | * P0AEP7 | POA6F5 | gcl_ecoli                  | ch60_ecoli                 |
| POA6F5 | CH60_ECOLI | * P05852 | POA6F5 | gcp_ecoli                  | ch60_ecoli                 |
| POA6F5 | CH60_ECOLI | * P0A9F6 | POA6F5 | gcva_ecoli                 | ch60_ecoli                 |
| POA6F5 | CH60_ECOLI | * P0ACL5 | POA6F5 | glcc_ecoli                 | ch60_ecoli                 |
| POA6F5 | CH60_ECOLI | * P37747 | POA6F5 | <a href="#">glf_ecoli</a>  | <a href="#">ch60_ecoli</a> |
| POA6F5 | CH60_ECOLI | * P0A6U8 | POA6F5 | glga_ecoli                 | ch60_ecoli                 |
| POA6F5 | CH60_ECOLI | * P07762 | POA6F5 | glgb_ecoli                 | ch60_ecoli                 |
| POA6F5 | CH60_ECOLI | * P15067 | POA6F5 | glgx_ecoli                 | ch60_ecoli                 |
| POA6F5 | CH60_ECOLI | * P27249 | POA6F5 | <a href="#">glnd_ecoli</a> | <a href="#">ch60_ecoli</a> |
| POA6F5 | CH60_ECOLI | * P0A9C0 | POA6F5 | glpa_ecoli                 | ch60_ecoli                 |
| POA6F5 | CH60_ECOLI | * P0A996 | POA6F5 | glpc_ecoli                 | ch60_ecoli                 |
| POA6F5 | CH60_ECOLI | * P13035 | POA6F5 | <a href="#">glpd_ecoli</a> | <a href="#">ch60_ecoli</a> |
| POA6F5 | CH60_ECOLI | * P31450 | POA6F5 | glvg_ecoli                 | ch60_ecoli                 |
| POA6F5 | CH60_ECOLI | * P77334 | POA6F5 | gmr_ecoli                  | ch60_ecoli                 |
| POA6F5 | CH60_ECOLI | * P45756 | POA6F5 | gspa_ecoli                 | ch60_ecoli                 |
| POA6F5 | CH60_ECOLI | * P0AES2 | POA6F5 | gudh_ecoli                 | ch60_ecoli                 |
| POA6F5 | CH60_ECOLI | * Q46915 | POA6F5 | gudx_ecoli                 | ch60_ecoli                 |
| POA6F5 | CH60_ECOLI | * P0CI31 | POA6F5 | hcab_ecoli                 | ch60_ecoli                 |
| POA6F5 | CH60_ECOLI | * P77650 | POA6F5 | hcad_ecoli                 | ch60_ecoli                 |
| POA6F5 | CH60_ECOLI | * P0ABR5 | POA6F5 | hcae_ecoli                 | ch60_ecoli                 |
| POA6F5 | CH60_ECOLI | * Q47141 | POA6F5 | hcar_ecoli                 | ch60_ecoli                 |
| POA6F5 | CH60_ECOLI | * P0AET8 | POA6F5 | <a href="#">hdha_ecoli</a> | <a href="#">ch60_ecoli</a> |
| POA6F5 | CH60_ECOLI | * P15038 | POA6F5 | <a href="#">held_ecoli</a> | <a href="#">ch60_ecoli</a> |
| POA6F5 | CH60_ECOLI | * P15038 | POA6F5 | <a href="#">held_ecoli</a> | <a href="#">ch60_ecoli</a> |

|        |            |          |        |                             |                            |
|--------|------------|----------|--------|-----------------------------|----------------------------|
| POA6F5 | CH60_ECOLI | * P0ACB4 | POA6F5 | hemg_ecoli                  | ch60_ecoli                 |
| POA6F5 | CH60_ECOLI | * P07109 | POA6F5 | hisp_ecoli                  | ch60_ecoli                 |
| POA6F5 | CH60_ECOLI | * P67910 | POA6F5 | <a href="#">hldd_ecoli</a>  | <a href="#">ch60_ecoli</a> |
| POA6F5 | CH60_ECOLI | * P24232 | POA6F5 | hmp_ecoli                   | ch60_ecoli                 |
| POA6F5 | CH60_ECOLI | * P51020 | POA6F5 | hoa_ecoli                   | ch60_ecoli                 |
| POA6F5 | CH60_ECOLI | * P36645 | POA6F5 | hofb_ecoli                  | ch60_ecoli                 |
| POA6F5 | CH60_ECOLI | * P28630 | POA6F5 | hola_ecoli                  | ch60_ecoli                 |
| POA6F5 | CH60_ECOLI | * P26281 | POA6F5 | hppk_ecoli                  | ch60_ecoli                 |
| POA6F5 | CH60_ECOLI | * P0ACV0 | POA6F5 | htrb_ecoli                  | ch60_ecoli                 |
| POA6F5 | CH60_ECOLI | * P33129 | POA6F5 | htre_ecoli                  | ch60_ecoli                 |
| POA6F5 | CH60_ECOLI | * P0AAJ8 | POA6F5 | hyba_ecoli                  | ch60_ecoli                 |
| POA6F5 | CH60_ECOLI | * P0AAN1 | POA6F5 | hybe_ecoli                  | ch60_ecoli                 |
| POA6F5 | CH60_ECOLI | * P16431 | POA6F5 | hyce_ecoli                  | ch60_ecoli                 |
| POA6F5 | CH60_ECOLI | * P16433 | POA6F5 | hycg_ecoli                  | ch60_ecoli                 |
| POA6F5 | CH60_ECOLI | * P0AAK4 | POA6F5 | hydn_ecoli                  | ch60_ecoli                 |
| POA6F5 | CH60_ECOLI | * P77329 | POA6F5 | hyfg_ecoli                  | ch60_ecoli                 |
| POA6F5 | CH60_ECOLI | * P77329 | POA6F5 | hyfg_ecoli                  | ch60_ecoli                 |
| POA6F5 | CH60_ECOLI | * P77329 | POA6F5 | hyfg_ecoli                  | ch60_ecoli                 |
| POA6F5 | CH60_ECOLI | * P71229 | POA6F5 | hyfr_ecoli                  | ch60_ecoli                 |
| POA6F5 | CH60_ECOLI | * P24192 | POA6F5 | hypd_ecoli                  | ch60_ecoli                 |
| POA6F5 | CH60_ECOLI | * P24192 | POA6F5 | hypd_ecoli                  | ch60_ecoli                 |
| POA6F5 | CH60_ECOLI | * P0AEW4 | POA6F5 | icc_ecoli                   | ch60_ecoli                 |
| POA6F5 | CH60_ECOLI | * P0A8S1 | POA6F5 | icia_ecoli                  | ch60_ecoli                 |
| POA6F5 | CH60_ECOLI | * P39343 | POA6F5 | idnr_ecoli                  | ch60_ecoli                 |
| POA6F5 | CH60_ECOLI | * P27294 | POA6F5 | inaa_ecoli                  | ch60_ecoli                 |
| POA6F5 | CH60_ECOLI | * P39347 | POA6F5 | intb_ecoli                  | ch60_ecoli                 |
| POA6F5 | CH60_ECOLI | * P76168 | POA6F5 | intq_ecoli                  | ch60_ecoli                 |
| POA6F5 | CH60_ECOLI | * P0A7A9 | POA6F5 | <a href="#">ipyrr_ecoli</a> | <a href="#">ch60_ecoli</a> |
| POA6F5 | CH60_ECOLI | * P62623 | POA6F5 | isph_ecoli                  | ch60_ecoli                 |
| POA6F5 | CH60_ECOLI | * P0AB77 | POA6F5 | <a href="#">kbl_ecoli</a>   | <a href="#">ch60_ecoli</a> |
| POA6F5 | CH60_ECOLI | * P0A715 | POA6F5 | kdsa_ecoli                  | ch60_ecoli                 |
| POA6F5 | CH60_ECOLI | * P0A715 | POA6F5 | kdsa_ecoli                  | ch60_ecoli                 |
| POA6F5 | CH60_ECOLI | * Q46938 | POA6F5 | kdui_ecoli                  | ch60_ecoli                 |
| POA6F5 | CH60_ECOLI | * P0A754 | POA6F5 | keff_ecoli                  | ch60_ecoli                 |
| POA6F5 | CH60_ECOLI | * P0A756 | POA6F5 | kefg_ecoli                  | ch60_ecoli                 |
| POA6F5 | CH60_ECOLI | * P00547 | POA6F5 | <a href="#">khse_ecoli</a>  | <a href="#">ch60_ecoli</a> |
| POA6F5 | CH60_ECOLI | * P38393 | POA6F5 | kil_ecoli                   | ch60_ecoli                 |
| POA6F5 | CH60_ECOLI | * P0AEX5 | POA6F5 | kppr_ecoli                  | ch60_ecoli                 |
| POA6F5 | CH60_ECOLI | * P0A717 | POA6F5 | <a href="#">kprs_ecoli</a>  | <a href="#">ch60_ecoli</a> |
| POA6F5 | CH60_ECOLI | * P69451 | POA6F5 | lcfa_ecoli                  | ch60_ecoli                 |
| POA6F5 | CH60_ECOLI | * P76008 | POA6F5 | ldca_ecoli                  | ch60_ecoli                 |
| POA6F5 | CH60_ECOLI | * P0A9H3 | POA6F5 | ldci_ecoli                  | ch60_ecoli                 |
| POA6F5 | CH60_ECOLI | * P10151 | POA6F5 | leuo_ecoli                  | ch60_ecoli                 |
| POA6F5 | CH60_ECOLI | * P0A8P1 | POA6F5 | lftr_ecoli                  | ch60_ecoli                 |
| POA6F5 | CH60_ECOLI | * P0AC81 | POA6F5 | lgul_ecoli                  | ch60_ecoli                 |

|        |            |          |        |                             |                            |
|--------|------------|----------|--------|-----------------------------|----------------------------|
| POA6F5 | CH60_ECOLI | * P60716 | POA6F5 | <a href="#">lipa_ecoli</a>  | <a href="#">ch60_ecoli</a> |
| POA6F5 | CH60_ECOLI | * P22731 | POA6F5 | <a href="#">livf_ecoli</a>  | <a href="#">ch60_ecoli</a> |
| POA6F5 | CH60_ECOLI | * P0A9S7 | POA6F5 | <a href="#">livg_ecoli</a>  | <a href="#">ch60_ecoli</a> |
| POA6F5 | CH60_ECOLI | * P33232 | POA6F5 | <a href="#">lidd_ecoli</a>  | <a href="#">ch60_ecoli</a> |
| POA6F5 | CH60_ECOLI | * P10441 | POA6F5 | <a href="#">lpxb_ecoli</a>  | <a href="#">ch60_ecoli</a> |
| POA6F5 | CH60_ECOLI | * P0A725 | POA6F5 | <a href="#">lpxc_ecoli</a>  | <a href="#">ch60_ecoli</a> |
| POA6F5 | CH60_ECOLI | * P43341 | POA6F5 | <a href="#">lpxh_ecoli</a>  | <a href="#">ch60_ecoli</a> |
| POA6F5 | CH60_ECOLI | * P77257 | POA6F5 | <a href="#">lsra_ecoli</a>  | <a href="#">ch60_ecoli</a> |
| POA6F5 | CH60_ECOLI | * P76143 | POA6F5 | <a href="#">lsrf_ecoli</a>  | <a href="#">ch60_ecoli</a> |
| POA6F5 | CH60_ECOLI | * P77432 | POA6F5 | <a href="#">lsrk_ecoli</a>  | <a href="#">ch60_ecoli</a> |
| POA6F5 | CH60_ECOLI | * P76141 | POA6F5 | <a href="#">lsrr_ecoli</a>  | <a href="#">ch60_ecoli</a> |
| POA6F5 | CH60_ECOLI | * P23917 | POA6F5 | <a href="#">mak_ecoli</a>   | <a href="#">ch60_ecoli</a> |
| POA6F5 | CH60_ECOLI | * P18811 | POA6F5 | <a href="#">mali_ecoli</a>  | <a href="#">ch60_ecoli</a> |
| POA6F5 | CH60_ECOLI | * P06993 | POA6F5 | <a href="#">malt_ecoli</a>  | <a href="#">ch60_ecoli</a> |
| POA6F5 | CH60_ECOLI | * P21517 | POA6F5 | <a href="#">malz_ecoli</a>  | <a href="#">ch60_ecoli</a> |
| POA6F5 | CH60_ECOLI | * P77188 | POA6F5 | <a href="#">matc_ecoli</a>  | <a href="#">ch60_ecoli</a> |
| POA6F5 | CH60_ECOLI | * P0AEY3 | POA6F5 | <a href="#">mazg_ecoli</a>  | <a href="#">ch60_ecoli</a> |
| POA6F5 | CH60_ECOLI | * P0AEY5 | POA6F5 | <a href="#">mdab_ecoli</a>  | <a href="#">ch60_ecoli</a> |
| POA6F5 | CH60_ECOLI | * P0ACH8 | POA6F5 | <a href="#">melr_ecoli</a>  | <a href="#">ch60_ecoli</a> |
| POA6F5 | CH60_ECOLI | * P38051 | POA6F5 | <a href="#">menf_ecoli</a>  | <a href="#">ch60_ecoli</a> |
| POA6F5 | CH60_ECOLI | * P07623 | POA6F5 | <a href="#">meta_ecoli</a>  | <a href="#">ch60_ecoli</a> |
| POA6F5 | CH60_ECOLI | * P06721 | POA6F5 | <a href="#">metc_ecoli</a>  | <a href="#">ch60_ecoli</a> |
| POA6F5 | CH60_ECOLI | * P0AEZ1 | POA6F5 | <a href="#">metf_ecoli</a>  | <a href="#">ch60_ecoli</a> |
| POA6F5 | CH60_ECOLI | * P0A817 | POA6F5 | <a href="#">metk_ecoli</a>  | <a href="#">ch60_ecoli</a> |
| POA6F5 | CH60_ECOLI | * P0AAG8 | POA6F5 | <a href="#">mgla_ecoli</a>  | <a href="#">ch60_ecoli</a> |
| POA6F5 | CH60_ECOLI | * P0ABR9 | POA6F5 | <a href="#">mhpbc_ecoli</a> | <a href="#">ch60_ecoli</a> |
| POA6F5 | CH60_ECOLI | * P77044 | POA6F5 | <a href="#">mhpc_ecoli</a>  | <a href="#">ch60_ecoli</a> |
| POA6F5 | CH60_ECOLI | * P16384 | POA6F5 | <a href="#">miaa_ecoli</a>  | <a href="#">ch60_ecoli</a> |
| POA6F5 | CH60_ECOLI | * P0AEI1 | POA6F5 | <a href="#">miab_ecoli</a>  | <a href="#">ch60_ecoli</a> |
| POA6F5 | CH60_ECOLI | * P76506 | POA6F5 | <a href="#">mlaa_ecoli</a>  | <a href="#">ch60_ecoli</a> |
| POA6F5 | CH60_ECOLI | * P63386 | POA6F5 | <a href="#">mlaf_ecoli</a>  | <a href="#">ch60_ecoli</a> |
| POA6F5 | CH60_ECOLI | * P63386 | POA6F5 | <a href="#">mlaf_ecoli</a>  | <a href="#">ch60_ecoli</a> |
| POA6F5 | CH60_ECOLI | * P63386 | POA6F5 | <a href="#">mlaf_ecoli</a>  | <a href="#">ch60_ecoli</a> |
| POA6F5 | CH60_ECOLI | * P33358 | POA6F5 | <a href="#">mlra_ecoli</a>  | <a href="#">ch60_ecoli</a> |
| POA6F5 | CH60_ECOLI | * P54746 | POA6F5 | <a href="#">mngb_ecoli</a>  | <a href="#">ch60_ecoli</a> |
| POA6F5 | CH60_ECOLI | * P30745 | POA6F5 | <a href="#">moaa_ecoli</a>  | <a href="#">ch60_ecoli</a> |
| POA6F5 | CH60_ECOLI | * P30745 | POA6F5 | <a href="#">moaa_ecoli</a>  | <a href="#">ch60_ecoli</a> |
| POA6F5 | CH60_ECOLI | * P30745 | POA6F5 | <a href="#">moaa_ecoli</a>  | <a href="#">ch60_ecoli</a> |
| POA6F5 | CH60_ECOLI | * P09833 | POA6F5 | <a href="#">modc_ecoli</a>  | <a href="#">ch60_ecoli</a> |
| POA6F5 | CH60_ECOLI | * P31060 | POA6F5 | <a href="#">modf_ecoli</a>  | <a href="#">ch60_ecoli</a> |
| POA6F5 | CH60_ECOLI | * P33345 | POA6F5 | <a href="#">molr_ecoli</a>  | <a href="#">ch60_ecoli</a> |
| POA6F5 | CH60_ECOLI | * P0ACV6 | POA6F5 | <a href="#">mpaa_ecoli</a>  | <a href="#">ch60_ecoli</a> |
| POA6F5 | CH60_ECOLI | * Q46865 | POA6F5 | <a href="#">mqsr_ecoli</a>  | <a href="#">ch60_ecoli</a> |
| POA6F5 | CH60_ECOLI | * P22186 | POA6F5 | <a href="#">mrz_ecoli</a>   | <a href="#">ch60_ecoli</a> |
| POA6F5 | CH60_ECOLI | * P0A9X4 | POA6F5 | <a href="#">mreb_ecoli</a>  | <a href="#">ch60_ecoli</a> |



|        |            |          |        |                             |                            |
|--------|------------|----------|--------|-----------------------------|----------------------------|
| POA6F5 | CH60_ECOLI | * P0A9X4 | POA6F5 | <a href="#">mreb_ecoli</a>  | <a href="#">ch60_ecoli</a> |
| POA6F5 | CH60_ECOLI | * P24205 | POA6F5 | <a href="#">msbb_ecoli</a>  | <a href="#">ch60_ecoli</a> |
| POA6F5 | CH60_ECOLI | * P0A9H1 | POA6F5 | mug_ecoli                   | ch60_ecoli                 |
| POA6F5 | CH60_ECOLI | * P17802 | POA6F5 | muty_ecoli                  | ch60_ecoli                 |
| POA6F5 | CH60_ECOLI | * P0A752 | POA6F5 | nadd_ecoli                  | ch60_ecoli                 |
| POA6F5 | CH60_ECOLI | * P0AF20 | POA6F5 | <a href="#">nagc_ecoli</a>  | <a href="#">ch60_ecoli</a> |
| POA6F5 | CH60_ECOLI | * P0AF24 | POA6F5 | nagd_ecoli                  | ch60_ecoli                 |
| POA6F5 | CH60_ECOLI | * P0A9I5 | POA6F5 | napd_ecoli                  | ch60_ecoli                 |
| POA6F5 | CH60_ECOLI | * P27896 | POA6F5 | narq_ecoli                  | ch60_ecoli                 |
| POA6F5 | CH60_ECOLI | * P19319 | POA6F5 | narz_ecoli                  | ch60_ecoli                 |
| POA6F5 | CH60_ECOLI | * P68739 | POA6F5 | nfi_ecoli                   | ch60_ecoli                 |
| POA6F5 | CH60_ECOLI | * P31600 | POA6F5 | nfra_ecoli                  | ch60_ecoli                 |
| POA6F5 | CH60_ECOLI | * P0A9G2 | POA6F5 | <a href="#">nhar_ecoli</a>  | <a href="#">ch60_ecoli</a> |
| POA6F5 | CH60_ECOLI | * P77567 | POA6F5 | nhoa_ecoli                  | ch60_ecoli                 |
| POA6F5 | CH60_ECOLI | * P33593 | POA6F5 | nikd_ecoli                  | ch60_ecoli                 |
| POA6F5 | CH60_ECOLI | * P33594 | POA6F5 | nike_ecoli                  | ch60_ecoli                 |
| POA6F5 | CH60_ECOLI | * P0A9N8 | POA6F5 | nrdg_ecoli                  | ch60_ecoli                 |
| POA6F5 | CH60_ECOLI | * P0AAK7 | POA6F5 | nrfc_ecoli                  | ch60_ecoli                 |
| POA6F5 | CH60_ECOLI | * P43337 | POA6F5 | nudl_ecoli                  | ch60_ecoli                 |
| POA6F5 | CH60_ECOLI | * P31979 | POA6F5 | <a href="#">nuof_ecoli</a>  | <a href="#">ch60_ecoli</a> |
| POA6F5 | CH60_ECOLI | * P0AFH0 | POA6F5 | ogt_ecoli                   | ch60_ecoli                 |
| POA6F5 | CH60_ECOLI | * P76773 | POA6F5 | ompl_ecoli                  | ch60_ecoli                 |
| POA6F5 | CH60_ECOLI | * P77737 | POA6F5 | oppf_ecoli                  | ch60_ecoli                 |
| POA6F5 | CH60_ECOLI | * P76086 | POA6F5 | paax_ecoli                  | ch60_ecoli                 |
| POA6F5 | CH60_ECOLI | * P00903 | POA6F5 | paba_ecoli                  | ch60_ecoli                 |
| POA6F5 | CH60_ECOLI | * P0A9J4 | POA6F5 | pane_ecoli                  | ch60_ecoli                 |
| POA6F5 | CH60_ECOLI | * P76577 | POA6F5 | pbpc_ecoli                  | ch60_ecoli                 |
| POA6F5 | CH60_ECOLI | * P0ACL9 | POA6F5 | <a href="#">pdhr_ecoli</a>  | <a href="#">ch60_ecoli</a> |
| POA6F5 | CH60_ECOLI | * Q57083 | POA6F5 | perr_ecoli                  | ch60_ecoli                 |
| POA6F5 | CH60_ECOLI | * P32675 | POA6F5 | pflc_ecoli                  | ch60_ecoli                 |
| POA6F5 | CH60_ECOLI | * P16677 | POA6F5 | phnc_ecoli                  | ch60_ecoli                 |
| POA6F5 | CH60_ECOLI | * P16679 | POA6F5 | phnl_ecoli                  | ch60_ecoli                 |
| POA6F5 | CH60_ECOLI | * P16690 | POA6F5 | phnn_ecoli                  | ch60_ecoli                 |
| POA6F5 | CH60_ECOLI | * P45548 | POA6F5 | php_ecoli                   | ch60_ecoli                 |
| POA6F5 | CH60_ECOLI | * P00914 | POA6F5 | phr_ecoli                   | ch60_ecoli                 |
| POA6F5 | CH60_ECOLI | * Q46806 | POA6F5 | <a href="#">phyda_ecoli</a> | <a href="#">ch60_ecoli</a> |
| POA6F5 | CH60_ECOLI | * P0A7A7 | POA6F5 | plsb_ecoli                  | ch60_ecoli                 |
| POA6F5 | CH60_ECOLI | * P0AFK0 | POA6F5 | <a href="#">pmba_ecoli</a>  | <a href="#">ch60_ecoli</a> |
| POA6F5 | CH60_ECOLI | * P18133 | POA6F5 | pncb_ecoli                  | ch60_ecoli                 |
| POA6F5 | CH60_ECOLI | * P69874 | POA6F5 | pota_ecoli                  | ch60_ecoli                 |
| POA6F5 | CH60_ECOLI | * P0A7B1 | POA6F5 | <a href="#">ppk_ecoli</a>   | <a href="#">ch60_ecoli</a> |
| POA6F5 | CH60_ECOLI | * P0A7B3 | POA6F5 | ppnk_ecoli                  | ch60_ecoli                 |
| POA6F5 | CH60_ECOLI | * P31992 | POA6F5 | ppta_ecoli                  | ch60_ecoli                 |
| POA6F5 | CH60_ECOLI | * P77541 | POA6F5 | prpb_ecoli                  | ch60_ecoli                 |
| POA6F5 | CH60_ECOLI | * P77243 | POA6F5 | <a href="#">prpd_ecoli</a>  | <a href="#">ch60_ecoli</a> |



|        |            |          |        |                             |                            |
|--------|------------|----------|--------|-----------------------------|----------------------------|
| POA6F5 | CH60_ECOLI | * P77495 | POA6F5 | prpe_ecoli                  | ch60_ecoli                 |
| POA6F5 | CH60_ECOLI | * P77743 | POA6F5 | prpr_ecoli                  | ch60_ecoli                 |
| POA6F5 | CH60_ECOLI | * P0AAH0 | POA6F5 | pstb_ecoli                  | ch60_ecoli                 |
| POA6F5 | CH60_ECOLI | * P0AAH0 | POA6F5 | pstb_ecoli                  | ch60_ecoli                 |
| POA6F5 | CH60_ECOLI | * P0AAH0 | POA6F5 | pstb_ecoli                  | ch60_ecoli                 |
| POA6F5 | CH60_ECOLI | * P33025 | POA6F5 | psug_ecoli                  | ch60_ecoli                 |
| POA6F5 | CH60_ECOLI | * P30235 | POA6F5 | psuk_ecoli                  | ch60_ecoli                 |
| POA6F5 | CH60_ECOLI | * P0A7D1 | POA6F5 | pth_ecoli                   | ch60_ecoli                 |
| POA6F5 | CH60_ECOLI | * P69826 | POA6F5 | <a href="#">ptmcb_ecoli</a> | <a href="#">ch60_ecoli</a> |
| POA6F5 | CH60_ECOLI | * P24555 | POA6F5 | ptrb_ecoli                  | ch60_ecoli                 |
| POA6F5 | CH60_ECOLI | * P37051 | POA6F5 | puru_ecoli                  | ch60_ecoli                 |
| POA6F5 | CH60_ECOLI | * P09546 | POA6F5 | <a href="#">puta_ecoli</a>  | <a href="#">ch60_ecoli</a> |
| POA6F5 | CH60_ECOLI | * P37906 | POA6F5 | puub_ecoli                  | ch60_ecoli                 |
| POA6F5 | CH60_ECOLI | * P0A7E1 | POA6F5 | pyrd_ecoli                  | ch60_ecoli                 |
| POA6F5 | CH60_ECOLI | * P0A7E9 | POA6F5 | pyrh_ecoli                  | ch60_ecoli                 |
| POA6F5 | CH60_ECOLI | * P24554 | POA6F5 | rada_ecoli                  | ch60_ecoli                 |
| POA6F5 | CH60_ECOLI | * P0ACQ0 | POA6F5 | rbsr_ecoli                  | ch60_ecoli                 |
| POA6F5 | CH60_ECOLI | * P69405 | POA6F5 | rcsa_ecoli                  | ch60_ecoli                 |
| POA6F5 | CH60_ECOLI | * P0C0K3 | POA6F5 | rdoa_ecoli                  | ch60_ecoli                 |
| POA6F5 | CH60_ECOLI | * P0A7H0 | POA6F5 | recf_ecoli                  | ch60_ecoli                 |
| POA6F5 | CH60_ECOLI | * P0A7H0 | POA6F5 | recf_ecoli                  | ch60_ecoli                 |
| POA6F5 | CH60_ECOLI | * P0A7H0 | POA6F5 | recf_ecoli                  | ch60_ecoli                 |
| POA6F5 | CH60_ECOLI | * P37692 | POA6F5 | <a href="#">rfaf_ecoli</a>  | <a href="#">ch60_ecoli</a> |
| POA6F5 | CH60_ECOLI | * P25740 | POA6F5 | <a href="#">rfag_ecoli</a>  | <a href="#">ch60_ecoli</a> |
| POA6F5 | CH60_ECOLI | * P27128 | POA6F5 | rfai_ecoli                  | ch60_ecoli                 |
| POA6F5 | CH60_ECOLI | * P27129 | POA6F5 | rfaj_ecoli                  | ch60_ecoli                 |
| POA6F5 | CH60_ECOLI | * P25741 | POA6F5 | <a href="#">rfap_ecoli</a>  | <a href="#">ch60_ecoli</a> |
| POA6F5 | CH60_ECOLI | * P25742 | POA6F5 | rfaq_ecoli                  | ch60_ecoli                 |
| POA6F5 | CH60_ECOLI | * P27240 | POA6F5 | rfay_ecoli                  | ch60_ecoli                 |
| POA6F5 | CH60_ECOLI | * P27241 | POA6F5 | rfaz_ecoli                  | ch60_ecoli                 |
| POA6F5 | CH60_ECOLI | * P27833 | POA6F5 | rffa_ecoli                  | ch60_ecoli                 |
| POA6F5 | CH60_ECOLI | * P32171 | POA6F5 | rhab_ecoli                  | ch60_ecoli                 |
| POA6F5 | CH60_ECOLI | * P09378 | POA6F5 | rhar_ecoli                  | ch60_ecoli                 |
| POA6F5 | CH60_ECOLI | * P09377 | POA6F5 | rhas_ecoli                  | ch60_ecoli                 |
| POA6F5 | CH60_ECOLI | * P77215 | POA6F5 | rhmd_ecoli                  | ch60_ecoli                 |
| POA6F5 | CH60_ECOLI | * P77732 | POA6F5 | rhmr_ecoli                  | ch60_ecoli                 |
| POA6F5 | CH60_ECOLI | * P16918 | POA6F5 | rhsc_ecoli                  | ch60_ecoli                 |
| POA6F5 | CH60_ECOLI | * P16919 | POA6F5 | rhsd_ecoli                  | ch60_ecoli                 |
| POA6F5 | CH60_ECOLI | * P24211 | POA6F5 | rhse_ecoli                  | ch60_ecoli                 |
| POA6F5 | CH60_ECOLI | * P24211 | POA6F5 | rhse_ecoli                  | ch60_ecoli                 |
| POA6F5 | CH60_ECOLI | * P25539 | POA6F5 | ribd_ecoli                  | ch60_ecoli                 |
| POA6F5 | CH60_ECOLI | * P25539 | POA6F5 | ribd_ecoli                  | ch60_ecoli                 |
| POA6F5 | CH60_ECOLI | * P0AG40 | POA6F5 | ribf_ecoli                  | ch60_ecoli                 |
| POA6F5 | CH60_ECOLI | * P0A948 | POA6F5 | <a href="#">rimj_ecoli</a>  | <a href="#">ch60_ecoli</a> |
| POA6F5 | CH60_ECOLI | * P45748 | POA6F5 | rimn_ecoli                  | ch60_ecoli                 |

|        |            |          |        |             |            |
|--------|------------|----------|--------|-------------|------------|
| POA6F5 | CH60_ECOLI | * P36999 | POA6F5 | rlma_ecoli  | ch60_ecoli |
| POA6F5 | CH60_ECOLI | * P0C0R7 | POA6F5 | rlme_ecoli  | ch60_ecoli |
| POA6F5 | CH60_ECOLI | * P0A8I8 | POA6F5 | rlmh_ecoli  | ch60_ecoli |
| POA6F5 | CH60_ECOLI | * P0ADR6 | POA6F5 | rlmm_ecoli  | ch60_ecoli |
| POA6F5 | CH60_ECOLI | * P36979 | POA6F5 | rlmn_ecoli  | ch60_ecoli |
| POA6F5 | CH60_ECOLI | * P33643 | POA6F5 | rlud_ecoli  | ch60_ecoli |
| POA6F5 | CH60_ECOLI | * P37745 | POA6F5 | rmlc_ecoli  | ch60_ecoli |
| POA6F5 | CH60_ECOLI | * P37745 | POA6F5 | rmlc_ecoli  | ch60_ecoli |
| POA6F5 | CH60_ECOLI | * P37760 | POA6F5 | rml_d_ecoli | ch60_ecoli |
| POA6F5 | CH60_ECOLI | * P09155 | POA6F5 | rnd_ecoli   | ch60_ecoli |
| POA6F5 | CH60_ECOLI | * P0ACS7 | POA6F5 | rpir_ecoli  | ch60_ecoli |
| POA6F5 | CH60_ECOLI | * P0A776 | POA6F5 | rpph_ecoli  | ch60_ecoli |
| POA6F5 | CH60_ECOLI | * P39286 | POA6F5 | rsga_ecoli  | ch60_ecoli |
| POA6F5 | CH60_ECOLI | * P06992 | POA6F5 | rsma_ecoli  | ch60_ecoli |
| POA6F5 | CH60_ECOLI | * P38104 | POA6F5 | rspa_ecoli  | ch60_ecoli |
| POA6F5 | CH60_ECOLI | * P52108 | POA6F5 | rsta_ecoli  | ch60_ecoli |
| POA6F5 | CH60_ECOLI | * P46850 | POA6F5 | rtcb_ecoli  | ch60_ecoli |
| POA6F5 | CH60_ECOLI | * P38035 | POA6F5 | rtcr_ecoli  | ch60_ecoli |
| POA6F5 | CH60_ECOLI | * P75817 | POA6F5 | rumb_ecoli  | ch60_ecoli |
| POA6F5 | CH60_ECOLI | * P0A812 | POA6F5 | ruvb_ecoli  | ch60_ecoli |
| POA6F5 | CH60_ECOLI | * P0A812 | POA6F5 | ruvb_ecoli  | ch60_ecoli |
| POA6F5 | CH60_ECOLI | * P0A812 | POA6F5 | ruvb_ecoli  | ch60_ecoli |
| POA6F5 | CH60_ECOLI | * P0A814 | POA6F5 | ruvc_ecoli  | ch60_ecoli |
| POA6F5 | CH60_ECOLI | * P0AAH4 | POA6F5 | sapd_ecoli  | ch60_ecoli |
| POA6F5 | CH60_ECOLI | * P07026 | POA6F5 | sdia_ecoli  | ch60_ecoli |
| POA6F5 | CH60_ECOLI | * P33667 | POA6F5 | selu_ecoli  | ch60_ecoli |
| POA6F5 | CH60_ECOLI | * P23721 | POA6F5 | serc_ecoli  | ch60_ecoli |
| POA6F5 | CH60_ECOLI | * P37678 | POA6F5 | sgbh_ecoli  | ch60_ecoli |
| POA6F5 | CH60_ECOLI | * P39362 | POA6F5 | sgce_ecoli  | ch60_ecoli |
| POA6F5 | CH60_ECOLI | * P39364 | POA6F5 | sgcq_ecoli  | ch60_ecoli |
| POA6F5 | CH60_ECOLI | * P39361 | POA6F5 | sgcr_ecoli  | ch60_ecoli |
| POA6F5 | CH60_ECOLI | * P33595 | POA6F5 | sgrr_ecoli  | ch60_ecoli |
| POA6F5 | CH60_ECOLI | * P36566 | POA6F5 | smta_ecoli  | ch60_ecoli |
| POA6F5 | CH60_ECOLI | * P09158 | POA6F5 | spee_ecoli  | ch60_ecoli |
| POA6F5 | CH60_ECOLI | * P08395 | POA6F5 | sppa_ecoli  | ch60_ecoli |
| POA6F5 | CH60_ECOLI | * P0AFV4 | POA6F5 | spr_ecoli   | ch60_ecoli |
| POA6F5 | CH60_ECOLI | * P05707 | POA6F5 | srl_d_ecoli | ch60_ecoli |
| POA6F5 | CH60_ECOLI | * Q46812 | POA6F5 | ssna_ecoli  | ch60_ecoli |
| POA6F5 | CH60_ECOLI | * P0ACA3 | POA6F5 | sspa_ecoli  | ch60_ecoli |
| POA6F5 | CH60_ECOLI | * P0AAI1 | POA6F5 | ssub_ecoli  | ch60_ecoli |
| POA6F5 | CH60_ECOLI | * P80644 | POA6F5 | ssue_ecoli  | ch60_ecoli |
| POA6F5 | CH60_ECOLI | * P76041 | POA6F5 | sucp_ecoli  | ch60_ecoli |
| POA6F5 | CH60_ECOLI | * P77499 | POA6F5 | sufc_ecoli  | ch60_ecoli |
| POA6F5 | CH60_ECOLI | * P26648 | POA6F5 | sufi_ecoli  | ch60_ecoli |
| POA6F5 | CH60_ECOLI | * P77444 | POA6F5 | sufs_ecoli  | ch60_ecoli |

|        |            |          |        |                            |                            |
|--------|------------|----------|--------|----------------------------|----------------------------|
| POA6F5 | CH60_ECOLI | * P07813 | POA6F5 | <a href="#">syl_ecoli</a>  | <a href="#">ch60_ecoli</a> |
| POA6F5 | CH60_ECOLI | * P16659 | POA6F5 | <a href="#">syp_ecoli</a>  | <a href="#">ch60_ecoli</a> |
| POA6F5 | CH60_ECOLI | * P0A8L1 | POA6F5 | <a href="#">sys_ecoli</a>  | <a href="#">ch60_ecoli</a> |
| POA6F5 | CH60_ECOLI | * P68398 | POA6F5 | <a href="#">tada_ecoli</a> | <a href="#">ch60_ecoli</a> |
| POA6F5 | CH60_ECOLI | * P0A9T4 | POA6F5 | <a href="#">tas_ecoli</a>  | <a href="#">ch60_ecoli</a> |
| POA6F5 | CH60_ECOLI | * Q47538 | POA6F5 | <a href="#">taub_ecoli</a> | <a href="#">ch60_ecoli</a> |
| POA6F5 | CH60_ECOLI | * P0ACQ7 | POA6F5 | <a href="#">tdca_ecoli</a> | <a href="#">ch60_ecoli</a> |
| POA6F5 | CH60_ECOLI | * P07913 | POA6F5 | <a href="#">tdh_ecoli</a>  | <a href="#">ch60_ecoli</a> |
| POA6F5 | CH60_ECOLI | * P25397 | POA6F5 | <a href="#">tehb_ecoli</a> | <a href="#">ch60_ecoli</a> |
| POA6F5 | CH60_ECOLI | * P0A847 | POA6F5 | <a href="#">tgt_ecoli</a>  | <a href="#">ch60_ecoli</a> |
| POA6F5 | CH60_ECOLI | * P31550 | POA6F5 | <a href="#">thib_ecoli</a> | <a href="#">ch60_ecoli</a> |
| POA6F5 | CH60_ECOLI | * P76422 | POA6F5 | <a href="#">thid_ecoli</a> | <a href="#">ch60_ecoli</a> |
| POA6F5 | CH60_ECOLI | * P30137 | POA6F5 | <a href="#">thie_ecoli</a> | <a href="#">ch60_ecoli</a> |
| POA6F5 | CH60_ECOLI | * P30138 | POA6F5 | <a href="#">thif_ecoli</a> | <a href="#">ch60_ecoli</a> |
| POA6F5 | CH60_ECOLI | * P30140 | POA6F5 | <a href="#">thih_ecoli</a> | <a href="#">ch60_ecoli</a> |
| POA6F5 | CH60_ECOLI | * P75948 | POA6F5 | <a href="#">thik_ecoli</a> | <a href="#">ch60_ecoli</a> |
| POA6F5 | CH60_ECOLI | * P0AGG0 | POA6F5 | <a href="#">thil_ecoli</a> | <a href="#">ch60_ecoli</a> |
| POA6F5 | CH60_ECOLI | * P76423 | POA6F5 | <a href="#">thim_ecoli</a> | <a href="#">ch60_ecoli</a> |
| POA6F5 | CH60_ECOLI | * P31548 | POA6F5 | <a href="#">thiq_ecoli</a> | <a href="#">ch60_ecoli</a> |
| POA6F5 | CH60_ECOLI | * P33225 | POA6F5 | <a href="#">tora_ecoli</a> | <a href="#">ch60_ecoli</a> |
| POA6F5 | CH60_ECOLI | * P46923 | POA6F5 | <a href="#">torz_ecoli</a> | <a href="#">ch60_ecoli</a> |
| POA6F5 | CH60_ECOLI | * P62601 | POA6F5 | <a href="#">tref_ecoli</a> | <a href="#">ch60_ecoli</a> |
| POA6F5 | CH60_ECOLI | * P0AGI8 | POA6F5 | <a href="#">trka_ecoli</a> | <a href="#">ch60_ecoli</a> |
| POA6F5 | CH60_ECOLI | * P0A8I5 | POA6F5 | <a href="#">trmb_ecoli</a> | <a href="#">ch60_ecoli</a> |
| POA6F5 | CH60_ECOLI | * P00909 | POA6F5 | <a href="#">trpc_ecoli</a> | <a href="#">ch60_ecoli</a> |
| POA6F5 | CH60_ECOLI | * P00895 | POA6F5 | <a href="#">trpe_ecoli</a> | <a href="#">ch60_ecoli</a> |
| POA6F5 | CH60_ECOLI | * P76055 | POA6F5 | <a href="#">ttca_ecoli</a> | <a href="#">ch60_ecoli</a> |
| POA6F5 | CH60_ECOLI | * P0AC35 | POA6F5 | <a href="#">ttdb_ecoli</a> | <a href="#">ch60_ecoli</a> |
| POA6F5 | CH60_ECOLI | * P45463 | POA6F5 | <a href="#">ttdr_ecoli</a> | <a href="#">ch60_ecoli</a> |
| POA6F5 | CH60_ECOLI | * P16525 | POA6F5 | <a href="#">tus_ecoli</a>  | <a href="#">ch60_ecoli</a> |
| POA6F5 | CH60_ECOLI | * P04693 | POA6F5 | <a href="#">tyrb_ecoli</a> | <a href="#">ch60_ecoli</a> |
| POA6F5 | CH60_ECOLI | * P0A6A0 | POA6F5 | <a href="#">ubib_ecoli</a> | <a href="#">ch60_ecoli</a> |
| POA6F5 | CH60_ECOLI | * P75728 | POA6F5 | <a href="#">ubif_ecoli</a> | <a href="#">ch60_ecoli</a> |
| POA6F5 | CH60_ECOLI | * P17993 | POA6F5 | <a href="#">ubig_ecoli</a> | <a href="#">ch60_ecoli</a> |
| POA6F5 | CH60_ECOLI | * P25534 | POA6F5 | <a href="#">ubih_ecoli</a> | <a href="#">ch60_ecoli</a> |
| POA6F5 | CH60_ECOLI | * P0AG03 | POA6F5 | <a href="#">ubix_ecoli</a> | <a href="#">ch60_ecoli</a> |
| POA6F5 | CH60_ECOLI | * P76373 | POA6F5 | <a href="#">udg_ecoli</a>  | <a href="#">ch60_ecoli</a> |
| POA6F5 | CH60_ECOLI | * P39305 | POA6F5 | <a href="#">ulae_ecoli</a> | <a href="#">ch60_ecoli</a> |
| POA6F5 | CH60_ECOLI | * P0A9W0 | POA6F5 | <a href="#">ular_ecoli</a> | <a href="#">ch60_ecoli</a> |
| POA6F5 | CH60_ECOLI | * P0A9W0 | POA6F5 | <a href="#">ular_ecoli</a> | <a href="#">ch60_ecoli</a> |
| POA6F5 | CH60_ECOLI | * P0A9W0 | POA6F5 | <a href="#">ular_ecoli</a> | <a href="#">ch60_ecoli</a> |
| POA6F5 | CH60_ECOLI | * P12295 | POA6F5 | <a href="#">ung_ecoli</a>  | <a href="#">ch60_ecoli</a> |
| POA6F5 | CH60_ECOLI | * P39177 | POA6F5 | <a href="#">uspg_ecoli</a> | <a href="#">ch60_ecoli</a> |
| POA6F5 | CH60_ECOLI | * P39177 | POA6F5 | <a href="#">uspg_ecoli</a> | <a href="#">ch60_ecoli</a> |
| POA6F5 | CH60_ECOLI | * P39177 | POA6F5 | <a href="#">uspg_ecoli</a> | <a href="#">ch60_ecoli</a> |

|        |            |          |        |            |            |
|--------|------------|----------|--------|------------|------------|
| POA6F5 | CH60_ECOLI | * P0A8G3 | POA6F5 | uxac_ecoli | ch60_ecoli |
| POA6F5 | CH60_ECOLI | * P27242 | POA6F5 | waau_ecoli | ch60_ecoli |
| POA6F5 | CH60_ECOLI | * P37750 | POA6F5 | wbbj_ecoli | ch60_ecoli |
| POA6F5 | CH60_ECOLI | * P77414 | POA6F5 | wcaa_ecoli | ch60_ecoli |
| POA6F5 | CH60_ECOLI | * P71237 | POA6F5 | wcac_ecoli | ch60_ecoli |
| POA6F5 | CH60_ECOLI | * P71244 | POA6F5 | wcam_ecoli | ch60_ecoli |
| POA6F5 | CH60_ECOLI | * P45563 | POA6F5 | xapa_ecoli | ch60_ecoli |
| POA6F5 | CH60_ECOLI | * P23841 | POA6F5 | xapr_ecoli | ch60_ecoli |
| POA6F5 | CH60_ECOLI | * P31434 | POA6F5 | xyls_ecoli | ch60_ecoli |
| POA6F5 | CH60_ECOLI | * P0A8I3 | POA6F5 | yaaa_ecoli | ch60_ecoli |
| POA6F5 | CH60_ECOLI | * P36879 | POA6F5 | yadg_ecoli | ch60_ecoli |
| POA6F5 | CH60_ECOLI | * P28634 | POA6F5 | yaeb_ecoli | ch60_ecoli |
| POA6F5 | CH60_ECOLI | * P0AA97 | POA6F5 | yaeq_ecoli | ch60_ecoli |
| POA6F5 | CH60_ECOLI | * P52096 | POA6F5 | yaer_ecoli | ch60_ecoli |
| POA6F5 | CH60_ECOLI | * Q47147 | POA6F5 | yafj_ecoli | ch60_ecoli |
| POA6F5 | CH60_ECOLI | * Q47151 | POA6F5 | yafI_ecoli | ch60_ecoli |
| POA6F5 | CH60_ECOLI | * Q47152 | POA6F5 | yafm_ecoli | ch60_ecoli |
| POA6F5 | CH60_ECOLI | * Q47158 | POA6F5 | yafp_ecoli | ch60_ecoli |
| POA6F5 | CH60_ECOLI | * P77206 | POA6F5 | yafz_ecoli | ch60_ecoli |
| POA6F5 | CH60_ECOLI | * P37007 | POA6F5 | yaga_ecoli | ch60_ecoli |
| POA6F5 | CH60_ECOLI | * P37008 | POA6F5 | yagb_ecoli | ch60_ecoli |
| POA6F5 | CH60_ECOLI | * P75682 | POA6F5 | yage_ecoli | ch60_ecoli |
| POA6F5 | CH60_ECOLI | * P77657 | POA6F5 | yagk_ecoli | ch60_ecoli |
| POA6F5 | CH60_ECOLI | * P71296 | POA6F5 | yagm_ecoli | ch60_ecoli |
| POA6F5 | CH60_ECOLI | * P75684 | POA6F5 | yagp_ecoli | ch60_ecoli |
| POA6F5 | CH60_ECOLI | * P77183 | POA6F5 | yagq_ecoli | ch60_ecoli |
| POA6F5 | CH60_ECOLI | * P77324 | POA6F5 | yags_ecoli | ch60_ecoli |
| POA6F5 | CH60_ECOLI | * P77165 | POA6F5 | yagt_ecoli | ch60_ecoli |
| POA6F5 | CH60_ECOLI | * P77694 | POA6F5 | yagw_ecoli | ch60_ecoli |
| POA6F5 | CH60_ECOLI | * P77700 | POA6F5 | yahb_ecoli | ch60_ecoli |
| POA6F5 | CH60_ECOLI | * P77297 | POA6F5 | yahe_ecoli | ch60_ecoli |
| POA6F5 | CH60_ECOLI | * P77221 | POA6F5 | yahg_ecoli | ch60_ecoli |
| POA6F5 | CH60_ECOLI | * P77393 | POA6F5 | yahl_ecoli | ch60_ecoli |
| POA6F5 | CH60_ECOLI | * P0AAP5 | POA6F5 | yaiv_ecoli | ch60_ecoli |
| POA6F5 | CH60_ECOLI | * P0AAQ2 | POA6F5 | yajd_ecoli | ch60_ecoli |
| POA6F5 | CH60_ECOLI | * P77735 | POA6F5 | yajo_ecoli | ch60_ecoli |
| POA6F5 | CH60_ECOLI | * P77301 | POA6F5 | ybap_ecoli | ch60_ecoli |
| POA6F5 | CH60_ECOLI | * P33668 | POA6F5 | ybbc_ecoli | ch60_ecoli |
| POA6F5 | CH60_ECOLI | * P77279 | POA6F5 | ybbI_ecoli | ch60_ecoli |
| POA6F5 | CH60_ECOLI | * P77279 | POA6F5 | ybbI_ecoli | ch60_ecoli |
| POA6F5 | CH60_ECOLI | * P0AFP4 | POA6F5 | ybbo_ecoli | ch60_ecoli |
| POA6F5 | CH60_ECOLI | * P37325 | POA6F5 | ybch_ecoli | ch60_ecoli |
| POA6F5 | CH60_ECOLI | * P77634 | POA6F5 | ybcm_ecoli | ch60_ecoli |
| POA6F5 | CH60_ECOLI | * P0AAT4 | POA6F5 | ybdg_ecoli | ch60_ecoli |
| POA6F5 | CH60_ECOLI | * P45579 | POA6F5 | ybdh_ecoli | ch60_ecoli |

|        |            |          |        |            |            |
|--------|------------|----------|--------|------------|------------|
| POA6F5 | CH60_ECOLI | * P77806 | POA6F5 | ybdl_ecoli | ch60_ecoli |
| POA6F5 | CH60_ECOLI | * P77216 | POA6F5 | ybdn_ecoli | ch60_ecoli |
| POA6F5 | CH60_ECOLI | * P77746 | POA6F5 | ybdo_ecoli | ch60_ecoli |
| POA6F5 | CH60_ECOLI | * P77316 | POA6F5 | ybdr_ecoli | ch60_ecoli |
| POA6F5 | CH60_ECOLI | * P30979 | POA6F5 | ybef_ecoli | ch60_ecoli |
| POA6F5 | CH60_ECOLI | * P0AAT9 | POA6F5 | ybel_ecoli | ch60_ecoli |
| POA6F5 | CH60_ECOLI | * P77627 | POA6F5 | yber_ecoli | ch60_ecoli |
| POA6F5 | CH60_ECOLI | * P75736 | POA6F5 | ybff_ecoli | ch60_ecoli |
| POA6F5 | CH60_ECOLI | * P75741 | POA6F5 | ybfl_ecoli | ch60_ecoli |
| POA6F5 | CH60_ECOLI | * P77779 | POA6F5 | ybfo_ecoli | ch60_ecoli |
| POA6F5 | CH60_ECOLI | * P24252 | POA6F5 | ybga_ecoli | ch60_ecoli |
| POA6F5 | CH60_ECOLI | * P0AAV4 | POA6F5 | ybgj_ecoli | ch60_ecoli |
| POA6F5 | CH60_ECOLI | * P75745 | POA6F5 | ybgk_ecoli | ch60_ecoli |
| POA6F5 | CH60_ECOLI | * P75746 | POA6F5 | ybgl_ecoli | ch60_ecoli |
| POA6F5 | CH60_ECOLI | * P75749 | POA6F5 | ybgp_ecoli | ch60_ecoli |
| POA6F5 | CH60_ECOLI | * P21829 | POA6F5 | ybha_ecoli | ch60_ecoli |
| POA6F5 | CH60_ECOLI | * P12994 | POA6F5 | ybhb_ecoli | ch60_ecoli |
| POA6F5 | CH60_ECOLI | * P75767 | POA6F5 | ybhk_ecoli | ch60_ecoli |
| POA6F5 | CH60_ECOLI | * P0AA84 | POA6F5 | ybho_ecoli | ch60_ecoli |
| POA6F5 | CH60_ECOLI | * P0AAW1 | POA6F5 | ybhp_ecoli | ch60_ecoli |
| POA6F5 | CH60_ECOLI | * P75785 | POA6F5 | ybip_ecoli | ch60_ecoli |
| POA6F5 | CH60_ECOLI | * P75791 | POA6F5 | ybiu_ecoli | ch60_ecoli |
| POA6F5 | CH60_ECOLI | * P75829 | POA6F5 | ybjx_ecoli | ch60_ecoli |
| POA6F5 | CH60_ECOLI | * P75843 | POA6F5 | ycaq_ecoli | ch60_ecoli |
| POA6F5 | CH60_ECOLI | * P0AB03 | POA6F5 | ycbj_ecoli | ch60_ecoli |
| POA6F5 | CH60_ECOLI | * P0AB06 | POA6F5 | ycbk_ecoli | ch60_ecoli |
| POA6F5 | CH60_ECOLI | * P31545 | POA6F5 | ycdb_ecoli | ch60_ecoli |
| POA6F5 | CH60_ECOLI | * P24188 | POA6F5 | ycea_ecoli | ch60_ecoli |
| POA6F5 | CH60_ECOLI | * P0AFQ7 | POA6F5 | ycfh_ecoli | ch60_ecoli |
| POA6F5 | CH60_ECOLI | * P29013 | POA6F5 | ycgb_ecoli | ch60_ecoli |
| POA6F5 | CH60_ECOLI | * P75990 | POA6F5 | ycgf_ecoli | ch60_ecoli |
| POA6F5 | CH60_ECOLI | * P76010 | POA6F5 | ycgr_ecoli | ch60_ecoli |
| POA6F5 | CH60_ECOLI | * P30192 | POA6F5 | ychg_ecoli | ch60_ecoli |
| POA6F5 | CH60_ECOLI | * P37052 | POA6F5 | ychj_ecoli | ch60_ecoli |
| POA6F5 | CH60_ECOLI | * P39165 | POA6F5 | ycho_ecoli | ch60_ecoli |
| POA6F5 | CH60_ECOLI | * P76034 | POA6F5 | ycit_ecoli | ch60_ecoli |
| POA6F5 | CH60_ECOLI | * P77503 | POA6F5 | ycjs_ecoli | ch60_ecoli |
| POA6F5 | CH60_ECOLI | * P76046 | POA6F5 | ycjx_ecoli | ch60_ecoli |
| POA6F5 | CH60_ECOLI | * P77546 | POA6F5 | ydav_ecoli | ch60_ecoli |
| POA6F5 | CH60_ECOLI | * P76104 | POA6F5 | ydcg_ecoli | ch60_ecoli |
| POA6F5 | CH60_ECOLI | * P77730 | POA6F5 | ydcr_ecoli | ch60_ecoli |
| POA6F5 | CH60_ECOLI | * P76108 | POA6F5 | ydcu_ecoli | ch60_ecoli |
| POA6F5 | CH60_ECOLI | * P76121 | POA6F5 | yddh_ecoli | ch60_ecoli |
| POA6F5 | CH60_ECOLI | * P31129 | POA6F5 | ydeh_ecoli | ch60_ecoli |
| POA6F5 | CH60_ECOLI | * P76134 | POA6F5 | ydem_ecoli | ch60_ecoli |



|        |            |          |        |            |            |
|--------|------------|----------|--------|------------|------------|
| POA6F5 | CH60_ECOLI | * P77286 | POA6F5 | ydeu_ecoli | ch60_ecoli |
| POA6F5 | CH60_ECOLI | * P39831 | POA6F5 | ydfg_ecoli | ch60_ecoli |
| POA6F5 | CH60_ECOLI | * P0ACM2 | POA6F5 | ydfh_ecoli | ch60_ecoli |
| POA6F5 | CH60_ECOLI | * P0ACR2 | POA6F5 | ydhb_ecoli | ch60_ecoli |
| POA6F5 | CH60_ECOLI | * P0A8A4 | POA6F5 | ydia_ecoli | ch60_ecoli |
| POA6F5 | CH60_ECOLI | * P37766 | POA6F5 | ydif_ecoli | ch60_ecoli |
| POA6F5 | CH60_ECOLI | * P77649 | POA6F5 | ydiu_ecoli | ch60_ecoli |
| POA6F5 | CH60_ECOLI | * P76204 | POA6F5 | ydiv_ecoli | ch60_ecoli |
| POA6F5 | CH60_ECOLI | * P77256 | POA6F5 | ydjg_ecoli | ch60_ecoli |
| POA6F5 | CH60_ECOLI | * P77280 | POA6F5 | ydjg_ecoli | ch60_ecoli |
| POA6F5 | CH60_ECOLI | * P76234 | POA6F5 | ydjg_ecoli | ch60_ecoli |
| POA6F5 | CH60_ECOLI | * P64483 | POA6F5 | ydae_ecoli | ch60_ecoli |
| POA6F5 | CH60_ECOLI | * P76241 | POA6F5 | yeak_ecoli | ch60_ecoli |
| POA6F5 | CH60_ECOLI | * P76270 | POA6F5 | yeam_ecoli | ch60_ecoli |
| POA6F5 | CH60_ECOLI | * P37774 | POA6F5 | yebr_ecoli | ch60_ecoli |
| POA6F5 | CH60_ECOLI | * P37348 | POA6F5 | yecc_ecoli | ch60_ecoli |
| POA6F5 | CH60_ECOLI | * P76318 | POA6F5 | yece_ecoli | ch60_ecoli |
| POA6F5 | CH60_ECOLI | * P76319 | POA6F5 | yedk_ecoli | ch60_ecoli |
| POA6F5 | CH60_ECOLI | * P76342 | POA6F5 | yedl_ecoli | ch60_ecoli |
| POA6F5 | CH60_ECOLI | * P0AD12 | POA6F5 | yedy_ecoli | ch60_ecoli |
| POA6F5 | CH60_ECOLI | * P37749 | POA6F5 | yeez_ecoli | ch60_ecoli |
| POA6F5 | CH60_ECOLI | * P37751 | POA6F5 | yefg_ecoli | ch60_ecoli |
| POA6F5 | CH60_ECOLI | * P76396 | POA6F5 | yefi_ecoli | ch60_ecoli |
| POA6F5 | CH60_ECOLI | * P33353 | POA6F5 | yegl_ecoli | ch60_ecoli |
| POA6F5 | CH60_ECOLI | * P33360 | POA6F5 | yehq_ecoli | ch60_ecoli |
| POA6F5 | CH60_ECOLI | * P33020 | POA6F5 | yehx_ecoli | ch60_ecoli |
| POA6F5 | CH60_ECOLI | * P33913 | POA6F5 | yeii_ecoli | ch60_ecoli |
| POA6F5 | CH60_ECOLI | * P33919 | POA6F5 | yaja_ecoli | ch60_ecoli |
| POA6F5 | CH60_ECOLI | * P17994 | POA6F5 | yajh_ecoli | ch60_ecoli |
| POA6F5 | CH60_ECOLI | * P76463 | POA6F5 | yafa_ecoli | ch60_ecoli |
| POA6F5 | CH60_ECOLI | * P0A959 | POA6F5 | yfaq_ecoli | ch60_ecoli |
| POA6F5 | CH60_ECOLI | * P77526 | POA6F5 | yfbq_ecoli | ch60_ecoli |
| POA6F5 | CH60_ECOLI | * P77775 | POA6F5 | yfcg_ecoli | ch60_ecoli |
| POA6F5 | CH60_ECOLI | * P77768 | POA6F5 | yfch_ecoli | ch60_ecoli |
| POA6F5 | CH60_ECOLI | * P76514 | POA6F5 | yfci_ecoli | ch60_ecoli |
| POA6F5 | CH60_ECOLI | * P77434 | POA6F5 | yfdr_ecoli | ch60_ecoli |
| POA6F5 | CH60_ECOLI | * P76538 | POA6F5 | yfdz_ecoli | ch60_ecoli |
| POA6F5 | CH60_ECOLI | * P77538 | POA6F5 | yfez_ecoli | ch60_ecoli |
| POA6F5 | CH60_ECOLI | * P33644 | POA6F5 | yfhr_ecoli | ch60_ecoli |
| POA6F5 | CH60_ECOLI | * P76594 | POA6F5 | yfih_ecoli | ch60_ecoli |
| POA6F5 | CH60_ECOLI | * P52126 | POA6F5 | yfiq_ecoli | ch60_ecoli |
| POA6F5 | CH60_ECOLI | * P52129 | POA6F5 | yfjk_ecoli | ch60_ecoli |
| POA6F5 | CH60_ECOLI | * P52132 | POA6F5 | yfjn_ecoli | ch60_ecoli |
| POA6F5 | CH60_ECOLI | * P52133 | POA6F5 | yfjq_ecoli | ch60_ecoli |
| POA6F5 | CH60_ECOLI | * P52139 | POA6F5 | yfjr_ecoli | ch60_ecoli |
| POA6F5 | CH60_ECOLI | * P52139 | POA6F5 | yfjx_ecoli | ch60_ecoli |

|        |            |          |        |            |            |
|--------|------------|----------|--------|------------|------------|
| POA6F5 | CH60_ECOLI | * P52140 | POA6F5 | yfjy_ecoli | ch60_ecoli |
| POA6F5 | CH60_ECOLI | * P37338 | POA6F5 | ygae_ecoli | ch60_ecoli |
| POA6F5 | CH60_ECOLI | * P37339 | POA6F5 | ygaf_ecoli | ch60_ecoli |
| POA6F5 | CH60_ECOLI | * P55734 | POA6F5 | ygap_ecoli | ch60_ecoli |
| POA6F5 | CH60_ECOLI | * Q46890 | POA6F5 | ygbl_ecoli | ch60_ecoli |
| POA6F5 | CH60_ECOLI | * Q46891 | POA6F5 | ygbm_ecoli | ch60_ecoli |
| POA6F5 | CH60_ECOLI | * Q46896 | POA6F5 | ygbt_ecoli | ch60_ecoli |
| POA6F5 | CH60_ECOLI | * P38036 | POA6F5 | ygcb_ecoli | ch60_ecoli |
| POA6F5 | CH60_ECOLI | * Q46897 | POA6F5 | ygch_ecoli | ch60_ecoli |
| POA6F5 | CH60_ECOLI | * P76632 | POA6F5 | ygck_ecoli | ch60_ecoli |
| POA6F5 | CH60_ECOLI | * Q46901 | POA6F5 | ygcl_ecoli | ch60_ecoli |
| POA6F5 | CH60_ECOLI | * Q46904 | POA6F5 | ygcn_ecoli | ch60_ecoli |
| POA6F5 | CH60_ECOLI | * Q46905 | POA6F5 | ygo_ecoli  | ch60_ecoli |
| POA6F5 | CH60_ECOLI | * P0ADR8 | POA6F5 | ygdh_ecoli | ch60_ecoli |
| POA6F5 | CH60_ECOLI | * P03813 | POA6F5 | ygea_ecoli | ch60_ecoli |
| POA6F5 | CH60_ECOLI | * P76639 | POA6F5 | ygeh_ecoli | ch60_ecoli |
| POA6F5 | CH60_ECOLI | * Q46802 | POA6F5 | ygev_ecoli | ch60_ecoli |
| POA6F5 | CH60_ECOLI | * P0AC28 | POA6F5 | ygfa_ecoli | ch60_ecoli |
| POA6F5 | CH60_ECOLI | * P0AC28 | POA6F5 | ygfa_ecoli | ch60_ecoli |
| POA6F5 | CH60_ECOLI | * P52043 | POA6F5 | yghf_ecoli | ch60_ecoli |
| POA6F5 | CH60_ECOLI | * Q46810 | POA6F5 | ygfj_ecoli | ch60_ecoli |
| POA6F5 | CH60_ECOLI | * P52052 | POA6F5 | yggr_ecoli | ch60_ecoli |
| POA6F5 | CH60_ECOLI | * P52062 | POA6F5 | yggw_ecoli | ch60_ecoli |
| POA6F5 | CH60_ECOLI | * P64572 | POA6F5 | yghr_ecoli | ch60_ecoli |
| POA6F5 | CH60_ECOLI | * Q46844 | POA6F5 | yght_ecoli | ch60_ecoli |
| POA6F5 | CH60_ECOLI | * Q46851 | POA6F5 | yghz_ecoli | ch60_ecoli |
| POA6F5 | CH60_ECOLI | * P24197 | POA6F5 | ygid_ecoli | ch60_ecoli |
| POA6F5 | CH60_ECOLI | * P42599 | POA6F5 | ygjr_ecoli | ch60_ecoli |
| POA6F5 | CH60_ECOLI | * P0A894 | POA6F5 | yhbj_ecoli | ch60_ecoli |
| POA6F5 | CH60_ECOLI | * P45527 | POA6F5 | yhbu_ecoli | ch60_ecoli |
| POA6F5 | CH60_ECOLI | * P45527 | POA6F5 | yhbu_ecoli | ch60_ecoli |
| POA6F5 | CH60_ECOLI | * P45527 | POA6F5 | yhbu_ecoli | ch60_ecoli |
| POA6F5 | CH60_ECOLI | * P0ADV5 | POA6F5 | yhbw_ecoli | ch60_ecoli |
| POA6F5 | CH60_ECOLI | * P0ADW6 | POA6F5 | yhcc_ecoli | ch60_ecoli |
| POA6F5 | CH60_ECOLI | * P64612 | POA6F5 | yhcm_ecoli | ch60_ecoli |
| POA6F5 | CH60_ECOLI | * P45769 | POA6F5 | yhdz_ecoli | ch60_ecoli |
| POA6F5 | CH60_ECOLI | * P45524 | POA6F5 | yhet_ecoli | ch60_ecoli |
| POA6F5 | CH60_ECOLI | * P37627 | POA6F5 | yhij_ecoli | ch60_ecoli |
| POA6F5 | CH60_ECOLI | * P37629 | POA6F5 | yhil_ecoli | ch60_ecoli |
| POA6F5 | CH60_ECOLI | * P37631 | POA6F5 | yhin_ecoli | ch60_ecoli |
| POA6F5 | CH60_ECOLI | * P37634 | POA6F5 | yhir_ecoli | ch60_ecoli |
| POA6F5 | CH60_ECOLI | * P37634 | POA6F5 | yhir_ecoli | ch60_ecoli |
| POA6F5 | CH60_ECOLI | * P37640 | POA6F5 | yhjb_ecoli | ch60_ecoli |
| POA6F5 | CH60_ECOLI | * P37646 | POA6F5 | yhjh_ecoli | ch60_ecoli |
| POA6F5 | CH60_ECOLI | * P37664 | POA6F5 | yiac_ecoli | ch60_ecoli |



|        |            |          |        |            |            |
|--------|------------|----------|--------|------------|------------|
| POA6F5 | CH60_ECOLI | * P11290 | POA6F5 | yibd_ecoli | ch60_ecoli |
| POA6F5 | CH60_ECOLI | * P0A8Y5 | POA6F5 | yida_ecoli | ch60_ecoli |
| POA6F5 | CH60_ECOLI | * P31443 | POA6F5 | yidf_ecoli | ch60_ecoli |
| POA6F5 | CH60_ECOLI | * P31449 | POA6F5 | yidl_ecoli | ch60_ecoli |
| POA6F5 | CH60_ECOLI | * P31453 | POA6F5 | yidp_ecoli | ch60_ecoli |
| POA6F5 | CH60_ECOLI | * P31463 | POA6F5 | yidz_ecoli | ch60_ecoli |
| POA6F5 | CH60_ECOLI | * P0ADM8 | POA6F5 | yiee_ecoli | ch60_ecoli |
| POA6F5 | CH60_ECOLI | * P23305 | POA6F5 | yiga_ecoli | ch60_ecoli |
| POA6F5 | CH60_ECOLI | * P32139 | POA6F5 | yihr_ecoli | ch60_ecoli |
| POA6F5 | CH60_ECOLI | * P0A8N7 | POA6F5 | yjea_ecoli | ch60_ecoli |
| POA6F5 | CH60_ECOLI | * P0AF67 | POA6F5 | yjee_ecoli | ch60_ecoli |
| POA6F5 | CH60_ECOLI | * P39280 | POA6F5 | yjek_ecoli | ch60_ecoli |
| POA6F5 | CH60_ECOLI | * P39308 | POA6F5 | yjfb_ecoli | ch60_ecoli |
| POA6F5 | CH60_ECOLI | * P39351 | POA6F5 | yjgz_ecoli | ch60_ecoli |
| POA6F5 | CH60_ECOLI | * P39360 | POA6F5 | yjhi_ecoli | ch60_ecoli |
| POA6F5 | CH60_ECOLI | * P39367 | POA6F5 | yjhp_ecoli | ch60_ecoli |
| POA6F5 | CH60_ECOLI | * P39369 | POA6F5 | yjhr_ecoli | ch60_ecoli |
| POA6F5 | CH60_ECOLI | * P39374 | POA6F5 | yjic_ecoli | ch60_ecoli |
| POA6F5 | CH60_ECOLI | * P39376 | POA6F5 | yjie_ecoli | ch60_ecoli |
| POA6F5 | CH60_ECOLI | * P39389 | POA6F5 | yjir_ecoli | ch60_ecoli |
| POA6F5 | CH60_ECOLI | * P39410 | POA6F5 | yjjj_ecoli | ch60_ecoli |
| POA6F5 | CH60_ECOLI | * P39407 | POA6F5 | yjju_ecoli | ch60_ecoli |
| POA6F5 | CH60_ECOLI | * P75675 | POA6F5 | ykfj_ecoli | ch60_ecoli |
| POA6F5 | CH60_ECOLI | * P77379 | POA6F5 | ykgd_ecoli | ch60_ecoli |
| POA6F5 | CH60_ECOLI | * P77536 | POA6F5 | ykgf_ecoli | ch60_ecoli |
| POA6F5 | CH60_ECOLI | * P75713 | POA6F5 | ylba_ecoli | ch60_ecoli |
| POA6F5 | CH60_ECOLI | * P77129 | POA6F5 | ylbe_ecoli | ch60_ecoli |
| POA6F5 | CH60_ECOLI | * P0AAS5 | POA6F5 | ylbf_ecoli | ch60_ecoli |
| POA6F5 | CH60_ECOLI | * P75967 | POA6F5 | ymfd_ecoli | ch60_ecoli |
| POA6F5 | CH60_ECOLI | * P77658 | POA6F5 | ynaa_ecoli | ch60_ecoli |
| POA6F5 | CH60_ECOLI | * P76092 | POA6F5 | ynbc_ecoli | ch60_ecoli |
| POA6F5 | CH60_ECOLI | * P76117 | POA6F5 | yncg_ecoli | ch60_ecoli |
| POA6F5 | CH60_ECOLI | * P77309 | POA6F5 | ynej_ecoli | ch60_ecoli |
| POA6F5 | CH60_ECOLI | * P77739 | POA6F5 | ynia_ecoli | ch60_ecoli |
| POA6F5 | CH60_ECOLI | * P76222 | POA6F5 | ynja_ecoli | ch60_ecoli |
| POA6F5 | CH60_ECOLI | * P76257 | POA6F5 | yoaa_ecoli | ch60_ecoli |
| POA6F5 | CH60_ECOLI | * P76280 | POA6F5 | yobb_ecoli | ch60_ecoli |
| POA6F5 | CH60_ECOLI | * P33941 | POA6F5 | yoji_ecoli | ch60_ecoli |
| POA6F5 | CH60_ECOLI | * P0AE39 | POA6F5 | ypdb_ecoli | ch60_ecoli |
| POA6F5 | CH60_ECOLI | * P77396 | POA6F5 | ypdc_ecoli | ch60_ecoli |
| POA6F5 | CH60_ECOLI | * P76524 | POA6F5 | ypdf_ecoli | ch60_ecoli |
| POA6F5 | CH60_ECOLI | * P76562 | POA6F5 | ypfi_ecoli | ch60_ecoli |
| POA6F5 | CH60_ECOLI | * P77509 | POA6F5 | yphe_ecoli | ch60_ecoli |
| POA6F5 | CH60_ECOLI | * P77475 | POA6F5 | yqab_ecoli | ch60_ecoli |
| POA6F5 | CH60_ECOLI | * P0ADU7 | POA6F5 | yqib_ecoli | ch60_ecoli |

|        |            |          |        |             |            |
|--------|------------|----------|--------|-------------|------------|
| POA6F5 | CH60_ECOLI | * P42620 | POA6F5 | yqjg_ecoli  | ch60_ecoli |
| POA6F5 | CH60_ECOLI | * P0ADE4 | POA6F5 | ytfm_ecoli  | ch60_ecoli |
| POA6F5 | CH60_ECOLI | * P0A9X1 | POA6F5 | znuc_ecoli  | ch60_ecoli |
| POA6F5 | CH60_ECOLI | * P0A9X1 | POA6F5 | znuc_ecoli  | ch60_ecoli |
| P17411 | CHBF_ECOLI | * P0AC38 | P17411 | aspa_ecoli  | chbf_ecoli |
| P17411 | CHBF_ECOLI | * P0AEK2 | P17411 | fabg_ecoli  | chbf_ecoli |
| P17411 | CHBF_ECOLI | * P12282 | P17411 | moeb_ecoli  | chbf_ecoli |
| P17411 | CHBF_ECOLI | * P77657 | P17411 | yagk_ecoli  | chbf_ecoli |
| POABH7 | CISY_ECOLI | * P36995 | POABH7 | cspb_ecoli  | cisy_ecoli |
| POABH7 | CISY_ECOLI | * P0A8E5 | POABH7 | yacl_ecoli  | cisy_ecoli |
| POABH7 | CISY_ECOLI | * P76097 | POABH7 | ydcj_ecoli  | cisy_ecoli |
| POABH7 | CISY_ECOLI | * P0A6G3 | POABH7 | ygad_ecoli  | cisy_ecoli |
| P77390 | CITC_ECOLI | none     |        |             |            |
| POABH9 | CLPA_ECOLI | * P36659 | POABH9 | cbpa_ecoli  | clpa_ecoli |
| POABH9 | CLPA_ECOLI | * P0A6G7 | POABH9 | clpp_ecoli  | clpa_ecoli |
| POABH9 | CLPA_ECOLI | * P0A8Q6 | POABH9 | clps_ecoli  | clpa_ecoli |
| POABH9 | CLPA_ECOLI | * P0A8Q6 | POABH9 | clps_ecoli  | clpa_ecoli |
| POABH9 | CLPA_ECOLI | * P0A6H1 | POABH9 | clpx_ecoli  | clpa_ecoli |
| POABH9 | CLPA_ECOLI | * P52095 | POABH9 | dclz_ecoli  | clpa_ecoli |
| POABH9 | CLPA_ECOLI | * P08622 | POABH9 | dnaj_ecoli  | clpa_ecoli |
| POABH9 | CLPA_ECOLI | * P77488 | POABH9 | dxs_ecoli   | clpa_ecoli |
| POABH9 | CLPA_ECOLI | * P0A6Q6 | POABH9 | fabz_ecoli  | clpa_ecoli |
| POABH9 | CLPA_ECOLI | * P61949 | POABH9 | flav_ecoli  | clpa_ecoli |
| POABH9 | CLPA_ECOLI | * P0AES4 | POABH9 | gyra_ecoli  | clpa_ecoli |
| POABH9 | CLPA_ECOLI | * P28905 | POABH9 | holc_ecoli  | clpa_ecoli |
| POABH9 | CLPA_ECOLI | * P77319 | POABH9 | hscC_ecoli  | clpa_ecoli |
| POABH9 | CLPA_ECOLI | * P0C054 | POABH9 | ibpa_ecoli  | clpa_ecoli |
| POABH9 | CLPA_ECOLI | * P0C054 | POABH9 | ibpa_ecoli  | clpa_ecoli |
| POABH9 | CLPA_ECOLI | * P0A7E9 | POABH9 | pyrh_ecoli  | clpa_ecoli |
| POABH9 | CLPA_ECOLI | * P60723 | POABH9 | rl4_ecoli   | clpa_ecoli |
| POABH9 | CLPA_ECOLI | * P0C0R7 | POABH9 | rlme_ecoli  | clpa_ecoli |
| POABH9 | CLPA_ECOLI | * P36979 | POABH9 | rlmn_ecoli  | clpa_ecoli |
| POABH9 | CLPA_ECOLI | * P0A7Y8 | POABH9 | rnpa_ecoli  | clpa_ecoli |
| POABH9 | CLPA_ECOLI | * P0A8V2 | POABH9 | rpob_ecoli  | clpa_ecoli |
| POABH9 | CLPA_ECOLI | * P0AGD7 | POABH9 | srp54_ecoli | clpa_ecoli |
| POABH9 | CLPA_ECOLI | * P0AFZ3 | POABH9 | sspb_ecoli  | clpa_ecoli |
| POABH9 | CLPA_ECOLI | * P0A832 | POABH9 | ssrp_ecoli  | clpa_ecoli |
| POABH9 | CLPA_ECOLI | * P0A6A0 | POABH9 | ubib_ecoli  | clpa_ecoli |
| POABH9 | CLPA_ECOLI | * P03018 | POABH9 | uvrd_ecoli  | clpa_ecoli |
| POABH9 | CLPA_ECOLI | * P39285 | POABH9 | yjep_ecoli  | clpa_ecoli |

|        |            |          |        |             |            |
|--------|------------|----------|--------|-------------|------------|
| P63284 | CLPB_ECOLI | * P77731 | P63284 | alla_ecoli  | clpb_ecoli |
| P63284 | CLPB_ECOLI | * P37617 | P63284 | atzn_ecoli  | clpb_ecoli |
| P63284 | CLPB_ECOLI | * P36659 | P63284 | cbpa_ecoli  | clpb_ecoli |
| P63284 | CLPB_ECOLI | * P0A6F5 | P63284 | ch60_ecoli  | clpb_ecoli |
| P63284 | CLPB_ECOLI | * P0A8Q6 | P63284 | clps_ecoli  | clpb_ecoli |
| P63284 | CLPB_ECOLI | * P0A6H1 | P63284 | clpx_ecoli  | clpb_ecoli |
| P63284 | CLPB_ECOLI | * P06968 | P63284 | dut_ecoli   | clpb_ecoli |
| P63284 | CLPB_ECOLI | * P37147 | P63284 | fxsa_ecoli  | clpb_ecoli |
| P63284 | CLPB_ECOLI | * P23524 | P63284 | glxk2_ecoli | clpb_ecoli |
| P63284 | CLPB_ECOLI | * P09372 | P63284 | grpe_ecoli  | clpb_ecoli |
| P63284 | CLPB_ECOLI | * P0A6L9 | P63284 | hscb_ecoli  | clpb_ecoli |
| P63284 | CLPB_ECOLI | * P0C054 | P63284 | ibpa_ecoli  | clpb_ecoli |
| P63284 | CLPB_ECOLI | * P39347 | P63284 | intb_ecoli  | clpb_ecoli |
| P63284 | CLPB_ECOLI | * P24175 | P63284 | manb_ecoli  | clpb_ecoli |
| P63284 | CLPB_ECOLI | * P0A9X4 | P63284 | mreb_ecoli  | clpb_ecoli |
| P63284 | CLPB_ECOLI | * P24205 | P63284 | msbb_ecoli  | clpb_ecoli |
| P63284 | CLPB_ECOLI | * P76577 | P63284 | pbpc_ecoli  | clpb_ecoli |
| P63284 | CLPB_ECOLI | * Q46920 | P63284 | quef_ecoli  | clpb_ecoli |
| P63284 | CLPB_ECOLI | * P25741 | P63284 | rfap_ecoli  | clpb_ecoli |
| P63284 | CLPB_ECOLI | * P27240 | P63284 | rfay_ecoli  | clpb_ecoli |
| P63284 | CLPB_ECOLI | * P36979 | P63284 | rlmn_ecoli  | clpb_ecoli |
| P63284 | CLPB_ECOLI | * P0AGB3 | P63284 | rp32_ecoli  | clpb_ecoli |
| P63284 | CLPB_ECOLI | * P0A8T7 | P63284 | rpoc_ecoli  | clpb_ecoli |
| P63284 | CLPB_ECOLI | * P0A812 | P63284 | ruvb_ecoli  | clpb_ecoli |
| P63284 | CLPB_ECOLI | * P0AGC7 | P63284 | smp_ecoli   | clpb_ecoli |
| P63284 | CLPB_ECOLI | * P0AFZ3 | P63284 | sspb_ecoli  | clpb_ecoli |
| P63284 | CLPB_ECOLI | * P0AG78 | P63284 | subi_ecoli  | clpb_ecoli |
| P63284 | CLPB_ECOLI | * P0A8N5 | P63284 | syk2_ecoli  | clpb_ecoli |
| P63284 | CLPB_ECOLI | * P0AAT4 | P63284 | ybdg_ecoli  | clpb_ecoli |
| P63284 | CLPB_ECOLI | * P76121 | P63284 | yddh_ecoli  | clpb_ecoli |
| P63284 | CLPB_ECOLI | * P45508 | P63284 | yfal_ecoli  | clpb_ecoli |
| P63284 | CLPB_ECOLI | * P11290 | P63284 | yibd_ecoli  | clpb_ecoli |
| P63284 | CLPB_ECOLI | * P77536 | P63284 | ykgf_ecoli  | clpb_ecoli |
| Q05433 | CLPE_ECOLX | none     |        |             |            |
| P76290 | CMOA_ECOLI | * P13024 | P76290 | fdhe_ecoli  | cmoa_ecoli |
| P76290 | CMOA_ECOLI | * P0ACY1 | P76290 | ydja_ecoli  | cmoa_ecoli |
| P08331 | CPDB_ECOLI | * P17443 | P08331 | murg_ecoli  | cpdb_ecoli |
| P08331 | CPDB_ECOLI | * P0AAR3 | P08331 | ybak_ecoli  | cpdb_ecoli |
| P0ACJ8 | CRP_ECOLI  | * A8A6G7 | P0ACJ8 | oxaa_ecohs  | crp_ecoli  |
| P0ACJ8 | CRP_ECOLI  | * P69407 | P0ACJ8 | rccb_ecoli  | crp_ecoli  |
| P0ACJ8 | CRP_ECOLI  | * P0A6A0 | P0ACJ8 | ubib_ecoli  | crp_ecoli  |

|        |            |          |        |             |            |
|--------|------------|----------|--------|-------------|------------|
| P0ACJ8 | CRP_ECOLI  | * P0A8E5 | P0ACJ8 | yacl_ecoli  | crp_ecoli  |
| P62604 | CSCR_ECOLX | none     |        |             |            |
| P0A9Y6 | CSPC_ECOLI | * P0A968 | P0A9Y6 | cspd_ecoli  | cspc_ecoli |
| P0A9Y6 | CSPC_ECOLI | * P0A968 | P0A9Y6 | cspd_ecoli  | cspc_ecoli |
| P0A9Y6 | CSPC_ECOLI | * P0A9P6 | P0A9Y6 | dead_ecoli  | cspc_ecoli |
| P0A9Y6 | CSPC_ECOLI | * P03007 | P0A9Y6 | dpo3e_ecoli | cspc_ecoli |
| P0A9Y6 | CSPC_ECOLI | * P0A6X3 | P0A9Y6 | hfq_ecoli   | cspc_ecoli |
| P0A9Y6 | CSPC_ECOLI | * P0A7Z4 | P0A9Y6 | rpoa_ecoli  | cspc_ecoli |
| P0A9Y6 | CSPC_ECOLI | * P0A8N5 | P0A9Y6 | syk2_ecoli  | cspc_ecoli |
| P0A9Y6 | CSPC_ECOLI | * P0A8G0 | P0A9Y6 | uvrc_ecoli  | cspc_ecoli |
| P0A9Y6 | CSPC_ECOLI | * P0A894 | P0A9Y6 | yhbj_ecoli  | cspc_ecoli |
| P0A968 | CSPD_ECOLI | * P77624 | P0A968 | arcm_ecoli  | cspd_ecoli |
| P0A968 | CSPD_ECOLI | * P0A9Y6 | P0A968 | cspd_ecoli  | cspd_ecoli |
| P69913 | CSRA_ECOLI | * P0AC69 | P69913 | glrx4_ecoli | csra_ecoli |
| P69913 | CSRA_ECOLI | * P15038 | P69913 | held_ecoli  | csra_ecoli |
| P69913 | CSRA_ECOLI | * P0A6X3 | P69913 | hfq_ecoli   | csra_ecoli |
| P0ABJ9 | CYDA_ECOLI | * P26459 | P0ABJ9 | appc_ecoli  | cyda_ecoli |
| P00816 | CYNS_ECOLI | none     |        |             |            |
| P0A9F3 | CYSB_ECOLI | * P0AE52 | P0A9F3 | bcp_ecoli   | cysb_ecoli |
| P0A9F3 | CYSB_ECOLI | * P0A8V2 | P0A9F3 | rpob_ecoli  | cysb_ecoli |
| P0A9F3 | CYSB_ECOLI | * P0A862 | P0A9F3 | tpx_ecoli   | cysb_ecoli |
| P0AEA8 | CYSG_ECOLI | none     |        |             |            |
| P17854 | CYSH_ECOLI | * P18776 | P17854 | dmsb_ecoli  | cysh_ecoli |
| P17854 | CYSH_ECOLI | * P10442 | P17854 | rnh2_ecoli  | cysh_ecoli |
| P17854 | CYSH_ECOLI | * Q46896 | P17854 | ygbt_ecoli  | cysh_ecoli |
| P38038 | CYSJ_ECOLI | * P28631 | P38038 | holb_ecoli  | cysj_ecoli |
| P38038 | CYSJ_ECOLI | * P75863 | P38038 | ycbx_ecoli  | cysj_ecoli |
| P38038 | CYSJ_ECOLI | * P75863 | P38038 | ycbx_ecoli  | cysj_ecoli |
| P0ABK5 | CYSK_ECOLI | * P16676 | P0ABK5 | cysa_ecoli  | cysk_ecoli |
| P0ABK5 | CYSK_ECOLI | * P0A9D4 | P0ABK5 | cyse_ecoli  | cysk_ecoli |
| P0ABK5 | CYSK_ECOLI | * P0ACS7 | P0ABK5 | rpir_ecoli  | cysk_ecoli |
| P0ABK5 | CYSK_ECOLI | * P77499 | P0ABK5 | sufc_ecoli  | cysk_ecoli |
| P0ABK5 | CYSK_ECOLI | * P0A8N5 | P0ABK5 | syk2_ecoli  | cysk_ecoli |

|        |            |          |        |              |            |
|--------|------------|----------|--------|--------------|------------|
| P16700 | CYSP_ECOLI | * P0A6D0 | P16700 | argr_ecoli   | cysp_ecoli |
| P16700 | CYSP_ECOLI | * Q9F557 | P16700 | q9f557_ecolx | cysp_ecoli |
| P16700 | CYSP_ECOLI | * P26648 | P16700 | sufi_ecoli   | cysp_ecoli |
| P22255 | CYSQ_ECOLI | * P0AC69 | P22255 | glrx4_ecoli  | cysq_ecoli |
| P22255 | CYSQ_ECOLI | * P76078 | P22255 | paab_ecoli   | cysq_ecoli |
| P22255 | CYSQ_ECOLI | * P0A7L8 | P22255 | rl27_ecoli   | cysq_ecoli |
| P22255 | CYSQ_ECOLI | * P0A8T7 | P22255 | rpoc_ecoli   | cysq_ecoli |
| P22255 | CYSQ_ECOLI | * Q57261 | P22255 | trud_ecoli   | cysq_ecoli |
| P22255 | CYSQ_ECOLI | * P45465 | P22255 | yrans_ecoli  | cysq_ecoli |
| P0AEB2 | DACA_ECOLI | * P0A964 | P0AEB2 | chew_ecoli   | daca_ecoli |
| P0AEB2 | DACA_ECOLI | * P0A9H9 | P0AEB2 | chez_ecoli   | daca_ecoli |
| P0AEB2 | DACA_ECOLI | * P77808 | P0AEB2 | cinal_ecoli  | daca_ecoli |
| P0AEB2 | DACA_ECOLI | * P0A9P6 | P0AEB2 | dead_ecoli   | daca_ecoli |
| P0AEB2 | DACA_ECOLI | * P0A707 | P0AEB2 | if3_ecoli    | daca_ecoli |
| P0AEB2 | DACA_ECOLI | * P0A8J8 | P0AEB2 | rh1b_ecoli   | daca_ecoli |
| P0AEB2 | DACA_ECOLI | * P52645 | P0AEB2 | ydbh_ecoli   | daca_ecoli |
| P0AEB2 | DACA_ECOLI | * P0AGJ5 | P0AEB2 | yfif_ecoli   | daca_ecoli |
| P08506 | DACC_ECOLI | * P43341 | P08506 | lpxh_ecoli   | dacc_ecoli |
| P0A6J5 | DADA_ECOLI | * P0ABB0 | P0A6J5 | atpa_ecoli   | dada_ecoli |
| P0A6J5 | DADA_ECOLI | * P0ABB0 | P0A6J5 | atpa_ecoli   | dada_ecoli |
| P0A6J5 | DADA_ECOLI | * P0A964 | P0A6J5 | chew_ecoli   | dada_ecoli |
| P0A6J5 | DADA_ECOLI | * P0A9H9 | P0A6J5 | chez_ecoli   | dada_ecoli |
| P0A6J5 | DADA_ECOLI | * P0ABJ1 | P0A6J5 | cyoa_ecoli   | dada_ecoli |
| P0A6J5 | DADA_ECOLI | * P0AEL6 | P0A6J5 | fepb_ecoli   | dada_ecoli |
| P0A6J5 | DADA_ECOLI | * P23878 | P0A6J5 | fepc_ecoli   | dada_ecoli |
| P0A6J5 | DADA_ECOLI | * P23871 | P0A6J5 | hemh_ecoli   | dada_ecoli |
| P0A6J5 | DADA_ECOLI | * P0A7A9 | P0A6J5 | ipyrc_ecoli  | dada_ecoli |
| P0A6J5 | DADA_ECOLI | * P10441 | P0A6J5 | lpxb_ecoli   | dada_ecoli |
| P0A6J5 | DADA_ECOLI | * P43341 | P0A6J5 | lpxh_ecoli   | dada_ecoli |
| P0A6J5 | DADA_ECOLI | * P30748 | P0A6J5 | moad_ecoli   | dada_ecoli |
| P0A6J5 | DADA_ECOLI | * P17443 | P0A6J5 | murg_ecoli   | dada_ecoli |
| P0A6J5 | DADA_ECOLI | * P31678 | P0A6J5 | otsb_ecoli   | dada_ecoli |
| P0A6J5 | DADA_ECOLI | * P23869 | P0A6J5 | ppib_ecoli   | dada_ecoli |
| P0A6J5 | DADA_ECOLI | * P24173 | P0A6J5 | rfac_ecoli   | dada_ecoli |
| P0A6J5 | DADA_ECOLI | * P0A850 | P0A6J5 | tig_ecoli    | dada_ecoli |
| P0A6J5 | DADA_ECOLI | * P39177 | P0A6J5 | uspg_ecoli   | dada_ecoli |
| P0A6J5 | DADA_ECOLI | * P0AFP4 | P0A6J5 | ybb0_ecoli   | dada_ecoli |
| P0A6J5 | DADA_ECOLI | * P0AD05 | P0A6J5 | yeca_ecoli   | dada_ecoli |
| P0A6J5 | DADA_ECOLI | * P0A8A2 | P0A6J5 | yeen_ecoli   | dada_ecoli |
| P0A6J5 | DADA_ECOLI | * P09996 | P0A6J5 | yidb_ecoli   | dada_ecoli |

|        |            |          |        |            |            |
|--------|------------|----------|--------|------------|------------|
| POA6L2 | DAPA_ECOLI | * P32177 | POA6L2 | fdhd_ecoli | dapa_ecoli |
| P04036 | DAPB_ECOLI | * P0AEX5 | P04036 | kppr_ecoli | dapb_ecoli |
| POA9D8 | DAPD_ECOLI | * P0AA25 | POA9D8 | thio_ecoli | dapd_ecoli |
| POA9D8 | DAPD_ECOLI | * P0AA25 | POA9D8 | thio_ecoli | dapd_ecoli |
| POA9D8 | DAPD_ECOLI | * P21514 | POA9D8 | yaha_ecoli | dapd_ecoli |
| POA9D8 | DAPD_ECOLI | * P76407 | POA9D8 | yegs_ecoli | dapd_ecoli |
| POAED7 | DAPE_ECOLI | * Q46925 | POAED7 | csda_ecoli | dape_ecoli |
| POAED7 | DAPE_ECOLI | * P09127 | POAED7 | hemx_ecoli | dape_ecoli |
| POA6K1 | DAPF_ECOLI | * P36979 | POA6K1 | rlmn_ecoli | dapf_ecoli |
| POA6K1 | DAPF_ECOLI | * P0A776 | POA6K1 | rpph_ecoli | dapf_ecoli |
| POA6K1 | DAPF_ECOLI | * P0A776 | POA6K1 | rpph_ecoli | dapf_ecoli |
| POACF0 | DBHA_ECOLI | * P0ACN4 | POACF0 | allr_ecoli | dbha_ecoli |
| POACF0 | DBHA_ECOLI | * P0A9X9 | POACF0 | cspa_ecoli | dbha_ecoli |
| POACF0 | DBHA_ECOLI | * P0A9Y6 | POACF0 | cspc_ecoli | dbha_ecoli |
| POACF0 | DBHA_ECOLI | * P0A9Y6 | POACF0 | cspc_ecoli | dbha_ecoli |
| POACF0 | DBHA_ECOLI | * P0A968 | POACF0 | cspd_ecoli | dbha_ecoli |
| POACF0 | DBHA_ECOLI | * P0A972 | POACF0 | cspe_ecoli | dbha_ecoli |
| POACF0 | DBHA_ECOLI | * P0ACF4 | POACF0 | dbhb_ecoli | dbha_ecoli |
| POACF0 | DBHA_ECOLI | * P0A9P6 | POACF0 | dead_ecoli | dbha_ecoli |
| POACF0 | DBHA_ECOLI | * P00582 | POACF0 | dpo1_ecoli | dbha_ecoli |
| POACF0 | DBHA_ECOLI | * P33371 | POACF0 | dusc_ecoli | dbha_ecoli |
| POACF0 | DBHA_ECOLI | * P0A6Q3 | POACF0 | faba_ecoli | dbha_ecoli |
| POACF0 | DBHA_ECOLI | * P0A6R3 | POACF0 | fis_ecoli  | dbha_ecoli |
| POACF0 | DBHA_ECOLI | * P0A6X3 | POACF0 | hfq_ecoli  | dbha_ecoli |
| POACF0 | DBHA_ECOLI | * P0A6X3 | POACF0 | hfq_ecoli  | dbha_ecoli |
| POACF0 | DBHA_ECOLI | * P0ACF8 | POACF0 | hns_ecoli  | dbha_ecoli |
| POACF0 | DBHA_ECOLI | * P0A6Y1 | POACF0 | ihfb_ecoli | dbha_ecoli |
| POACF0 | DBHA_ECOLI | * P32053 | POACF0 | inta_ecoli | dbha_ecoli |
| POACF0 | DBHA_ECOLI | * P0A715 | POACF0 | kdsa_ecoli | dbha_ecoli |
| POACF0 | DBHA_ECOLI | * P25522 | POACF0 | mnme_ecoli | dbha_ecoli |
| POACF0 | DBHA_ECOLI | * P17443 | POACF0 | murg_ecoli | dbha_ecoli |
| POACF0 | DBHA_ECOLI | * P68739 | POACF0 | nfi_ecoli  | dbha_ecoli |
| POACF0 | DBHA_ECOLI | * P0A9K3 | POACF0 | phol_ecoli | dbha_ecoli |
| POACF0 | DBHA_ECOLI | * P00490 | POACF0 | phsm_ecoli | dbha_ecoli |
| POACF0 | DBHA_ECOLI | * P05055 | POACF0 | pnp_ecoli  | dbha_ecoli |
| POACF0 | DBHA_ECOLI | * P0A7E9 | POACF0 | pyrh_ecoli | dbha_ecoli |
| POACF0 | DBHA_ECOLI | * P69405 | POACF0 | rcsa_ecoli | dbha_ecoli |
| POACF0 | DBHA_ECOLI | * P07012 | POACF0 | rf2_ecoli  | dbha_ecoli |
| POACF0 | DBHA_ECOLI | * P25539 | POACF0 | ribd_ecoli | dbha_ecoli |
| POACF0 | DBHA_ECOLI | * P36979 | POACF0 | rlmn_ecoli | dbha_ecoli |



|        |            |   |        |        |            |            |
|--------|------------|---|--------|--------|------------|------------|
| POACF0 | DBHA_ECOLI | * | P37765 | POACF0 | rlub_ecoli | dbha_ecoli |
| POACF0 | DBHA_ECOLI | * | P0AA39 | POACF0 | rluc_ecoli | dbha_ecoli |
| POACF0 | DBHA_ECOLI | * | P0A7Y4 | POACF0 | rnh_ecoli  | dbha_ecoli |
| POACF0 | DBHA_ECOLI | * | P0A7Y8 | POACF0 | rnpa_ecoli | dbha_ecoli |
| POACF0 | DBHA_ECOLI | * | P21499 | POACF0 | rnrc_ecoli | dbha_ecoli |
| POACF0 | DBHA_ECOLI | * | P0A7Z4 | POACF0 | rpoa_ecoli | dbha_ecoli |
| POACF0 | DBHA_ECOLI | * | P0A8V2 | POACF0 | rpob_ecoli | dbha_ecoli |
| POACF0 | DBHA_ECOLI | * | P0A8V2 | POACF0 | rpob_ecoli | dbha_ecoli |
| POACF0 | DBHA_ECOLI | * | P0A8T7 | POACF0 | rpoc_ecoli | dbha_ecoli |
| POACF0 | DBHA_ECOLI | * | P0A776 | POACF0 | rpph_ecoli | dbha_ecoli |
| POACF0 | DBHA_ECOLI | * | P0A9K9 | POACF0 | slyd_ecoli | dbha_ecoli |
| POACF0 | DBHA_ECOLI | * | P0AG24 | POACF0 | spot_ecoli | dbha_ecoli |
| POACF0 | DBHA_ECOLI | * | P15082 | POACF0 | srlr_ecoli | dbha_ecoli |
| POACF0 | DBHA_ECOLI | * | P28043 | POACF0 | ssb2_ecolx | dbha_ecoli |
| POACF0 | DBHA_ECOLI | * | P0A832 | POACF0 | ssrp_ecoli | dbha_ecoli |
| POACF0 | DBHA_ECOLI | * | P19705 | POACF0 | t1se_ecolx | dbha_ecoli |
| POACF0 | DBHA_ECOLI | * | P0A847 | POACF0 | tgt_ecoli  | dbha_ecoli |
| POACF0 | DBHA_ECOLI | * | P06612 | POACF0 | top1_ecoli | dbha_ecoli |
| POACF0 | DBHA_ECOLI | * | P14294 | POACF0 | top3_ecoli | dbha_ecoli |
| POACF0 | DBHA_ECOLI | * | P0A8F8 | POACF0 | uvrb_ecoli | dbha_ecoli |
| POACF0 | DBHA_ECOLI | * | P0A8G0 | POACF0 | uvrc_ecoli | dbha_ecoli |
| POACF0 | DBHA_ECOLI | * | P03018 | POACF0 | uvrd_ecoli | dbha_ecoli |
| POACF0 | DBHA_ECOLI | * | P0AFP2 | POACF0 | ybaz_ecoli | dbha_ecoli |
| POACF0 | DBHA_ECOLI | * | P0AAS7 | POACF0 | ybcj_ecoli | dbha_ecoli |
| POACF0 | DBHA_ECOLI | * | P75829 | POACF0 | ybjx_ecoli | dbha_ecoli |
| POACF0 | DBHA_ECOLI | * | P0AGJ5 | POACF0 | yfif_ecoli | dbha_ecoli |
| POACF0 | DBHA_ECOLI | * | P0AF59 | POACF0 | yjdi_ecoli | dbha_ecoli |
| POACF4 | DBHB_ECOLI | * | P0A6A8 | POACF4 | acp_ecoli  | dbhb_ecoli |
| POACF4 | DBHB_ECOLI | * | P0A9X9 | POACF4 | cspa_ecoli | dbhb_ecoli |
| POACF4 | DBHB_ECOLI | * | P0A9Y6 | POACF4 | cspc_ecoli | dbhb_ecoli |
| POACF4 | DBHB_ECOLI | * | P0ACF0 | POACF4 | dbha_ecoli | dbhb_ecoli |
| POACF4 | DBHB_ECOLI | * | P0A9P6 | POACF4 | dead_ecoli | dbhb_ecoli |
| POACF4 | DBHB_ECOLI | * | P00582 | POACF4 | dpo1_ecoli | dbhb_ecoli |
| POACF4 | DBHB_ECOLI | * | P50465 | POACF4 | end8_ecoli | dbhb_ecoli |
| POACF4 | DBHB_ECOLI | * | P0A6X3 | POACF4 | hfq_ecoli  | dbhb_ecoli |
| POACF4 | DBHB_ECOLI | * | P0A707 | POACF4 | if3_ecoli  | dbhb_ecoli |
| POACF4 | DBHB_ECOLI | * | P0A6Y1 | POACF4 | ihfb_ecoli | dbhb_ecoli |
| POACF4 | DBHB_ECOLI | * | P04951 | POACF4 | kdsb_ecoli | dbhb_ecoli |
| POACF4 | DBHB_ECOLI | * | P68739 | POACF4 | nfi_ecoli  | dbhb_ecoli |
| POACF4 | DBHB_ECOLI | * | P0A7E9 | POACF4 | pyrh_ecoli | dbhb_ecoli |
| POACF4 | DBHB_ECOLI | * | P07012 | POACF4 | rf2_ecoli  | dbhb_ecoli |
| POACF4 | DBHB_ECOLI | * | P0AA39 | POACF4 | rluc_ecoli | dbhb_ecoli |
| POACF4 | DBHB_ECOLI | * | P0A9K9 | POACF4 | slyd_ecoli | dbhb_ecoli |
| POACF4 | DBHB_ECOLI | * | P15082 | POACF4 | srlr_ecoli | dbhb_ecoli |



|        |            |          |        |             |            |
|--------|------------|----------|--------|-------------|------------|
| P0ACF4 | DBHB_ECOLI | * P0A832 | P0ACF4 | ssrp_ecoli  | dbhb_ecoli |
| P0ACF4 | DBHB_ECOLI | * P19705 | P0ACF4 | t1se_ecolx  | dbhb_ecoli |
| P0ACF4 | DBHB_ECOLI | * P0A847 | P0ACF4 | tgt_ecoli   | dbhb_ecoli |
| P0ACF4 | DBHB_ECOLI | * P0AA25 | P0ACF4 | thio_ecoli  | dbhb_ecoli |
| P0ACF4 | DBHB_ECOLI | * P06612 | P0ACF4 | top1_ecoli  | dbhb_ecoli |
| P0ACF4 | DBHB_ECOLI | * P0A9W0 | P0ACF4 | ular_ecoli  | dbhb_ecoli |
| P0ACF4 | DBHB_ECOLI | * P0A8F8 | P0ACF4 | uvrb_ecoli  | dbhb_ecoli |
| P0ACF4 | DBHB_ECOLI | * P03018 | P0ACF4 | uvrd_ecoli  | dbhb_ecoli |
| P0ACF4 | DBHB_ECOLI | * P0AAS7 | P0ACF4 | ybcj_ecoli  | dbhb_ecoli |
| P0ACF4 | DBHB_ECOLI | * P75829 | P0ACF4 | ybjx_ecoli  | dbhb_ecoli |
| P0ACF4 | DBHB_ECOLI | * P76594 | P0ACF4 | yfiq_ecoli  | dbhb_ecoli |
| P0ACF4 | DBHB_ECOLI | * P45465 | P0ACF4 | yran_ecoli  | dbhb_ecoli |
|        |            |          |        |             |            |
| P69908 | DCEA_ECOLI | * P69910 | P69908 | dceb_ecoli  | dcea_ecoli |
| P69908 | DCEA_ECOLI | * P69910 | P69908 | dceb_ecoli  | dcea_ecoli |
| P69908 | DCEA_ECOLI | * P0A6Y8 | P69908 | dnak_ecoli  | dcea_ecoli |
| P69908 | DCEA_ECOLI | * P09372 | P69908 | grpe_ecoli  | dcea_ecoli |
| P69908 | DCEA_ECOLI | * P0C054 | P69908 | ibpa_ecoli  | dcea_ecoli |
| P69908 | DCEA_ECOLI | * P0A8N5 | P69908 | syk2_ecoli  | dcea_ecoli |
| P69908 | DCEA_ECOLI | * P36682 | P69908 | yach_ecoli  | dcea_ecoli |
|        |            |          |        |             |            |
| P69910 | DCEB_ECOLI | * P69908 | P69910 | dcea_ecoli  | dceb_ecoli |
| P69910 | DCEB_ECOLI | * P69908 | P69910 | dcea_ecoli  | dceb_ecoli |
| P69910 | DCEB_ECOLI | * P69908 | P69910 | dcea_ecoli  | dceb_ecoli |
| P69910 | DCEB_ECOLI | * P0A6Y8 | P69910 | dnak_ecoli  | dceb_ecoli |
| P69910 | DCEB_ECOLI | * P09372 | P69910 | grpe_ecoli  | dceb_ecoli |
| P69910 | DCEB_ECOLI | * P15038 | P69910 | held_ecoli  | dceb_ecoli |
| P69910 | DCEB_ECOLI | * P0C058 | P69910 | ibpb_ecoli  | dceb_ecoli |
| P69910 | DCEB_ECOLI | * P0A8N5 | P69910 | syk2_ecoli  | dceb_ecoli |
| P69910 | DCEB_ECOLI | * P0ADQ2 | P69910 | yiiid_ecoli | dceb_ecoli |
| P69910 | DCEB_ECOLI | * P0AF67 | P69910 | yjee_ecoli  | dceb_ecoli |
|        |            |          |        |             |            |
| P0AED9 | DCM_ECOLI  | * P77231 | P0AED9 | citg_ecoli  | dcm_ecoli  |
| P0AED9 | DCM_ECOLI  | * P25522 | P0AED9 | mnme_ecoli  | dcm_ecoli  |
| P0AED9 | DCM_ECOLI  | * P06959 | P0AED9 | odp2_ecoli  | dcm_ecoli  |
|        |            |          |        |             |            |
| P24171 | DCP_ECOLI  | * P77432 | P24171 | lsrk_ecoli  | dcp_ecoli  |
|        |            |          |        |             |            |
| P0ABN9 | DCUB_ECOLI | none     |        |             |            |
|        |            |          |        |             |            |
| P0AEC8 | DCUS_ECOLI | none     |        |             |            |
|        |            |          |        |             |            |
| P0A6J8 | DDLA_ECOLI | * P0A968 | P0A6J8 | cspd_ecoli  | ddla_ecoli |
|        |            |          |        |             |            |
| P0A9P6 | DEAD_ECOLI | * P0AE18 | P0A9P6 | ampm_ecoli  | dead_ecoli |

|        |            |          |        |             |            |
|--------|------------|----------|--------|-------------|------------|
| POA9P6 | DEAD_ECOLI | * P36659 | POA9P6 | cbpa_ecoli  | dead_ecoli |
| POA9P6 | DEAD_ECOLI | * P0A9X9 | POA9P6 | cspa_ecoli  | dead_ecoli |
| POA9P6 | DEAD_ECOLI | * P0A9Y6 | POA9P6 | cspc_ecoli  | dead_ecoli |
| POA9P6 | DEAD_ECOLI | * P0A9Y6 | POA9P6 | cspc_ecoli  | dead_ecoli |
| POA9P6 | DEAD_ECOLI | * P0A968 | POA9P6 | cspd_ecoli  | dead_ecoli |
| POA9P6 | DEAD_ECOLI | * P08622 | POA9P6 | dnaj_ecoli  | dead_ecoli |
| POA9P6 | DEAD_ECOLI | * P0ABT2 | POA9P6 | dps_ecoli   | dead_ecoli |
| POA9P6 | DEAD_ECOLI | * P0A6Q3 | POA9P6 | faba_ecoli  | dead_ecoli |
| POA9P6 | DEAD_ECOLI | * P0AES6 | POA9P6 | gyrb_ecoli  | dead_ecoli |
| POA9P6 | DEAD_ECOLI | * P0A6X3 | POA9P6 | hfq_ecoli   | dead_ecoli |
| POA9P6 | DEAD_ECOLI | * P0A7B8 | POA9P6 | hslv_ecoli  | dead_ecoli |
| POA9P6 | DEAD_ECOLI | * P0AFG0 | POA9P6 | nusg_ecoli  | dead_ecoli |
| POA9P6 | DEAD_ECOLI | * P0A9K3 | POA9P6 | phol_ecoli  | dead_ecoli |
| POA9P6 | DEAD_ECOLI | * P60723 | POA9P6 | rl4_ecoli   | dead_ecoli |
| POA9P6 | DEAD_ECOLI | * P36979 | POA9P6 | rlmn_ecoli  | dead_ecoli |
| POA9P6 | DEAD_ECOLI | * P0AA39 | POA9P6 | rluc_ecoli  | dead_ecoli |
| POA9P6 | DEAD_ECOLI | * P21513 | POA9P6 | rne_ecoli   | dead_ecoli |
| POA9P6 | DEAD_ECOLI | * P21513 | POA9P6 | rne_ecoli   | dead_ecoli |
| POA9P6 | DEAD_ECOLI | * P0A7Y8 | POA9P6 | rnpa_ecoli  | dead_ecoli |
| POA9P6 | DEAD_ECOLI | * P21499 | POA9P6 | rnrc_ecoli  | dead_ecoli |
| POA9P6 | DEAD_ECOLI | * P0A776 | POA9P6 | rppe_ecoli  | dead_ecoli |
| POA9P6 | DEAD_ECOLI | * P0AG24 | POA9P6 | spot_ecoli  | dead_ecoli |
| POA9P6 | DEAD_ECOLI | * P0A847 | POA9P6 | tgt_ecoli   | dead_ecoli |
| POA9P6 | DEAD_ECOLI | * P0A8I5 | POA9P6 | trmb_ecoli  | dead_ecoli |
| POA9P6 | DEAD_ECOLI | * P0A8B5 | POA9P6 | ybab_ecoli  | dead_ecoli |
| POA9P6 | DEAD_ECOLI | * P0AAS7 | POA9P6 | ybcj_ecoli  | dead_ecoli |
| POA9P6 | DEAD_ECOLI | * P0AGJ5 | POA9P6 | yfif_ecoli  | dead_ecoli |
| POA6K3 | DEF_ECOLI  | * P0A6A3 | POA6K3 | acka_ecoli  | def_ecoli  |
| POA6K3 | DEF_ECOLI  | * P77624 | POA6K3 | arcm_ecoli  | def_ecoli  |
| POA6K3 | DEF_ECOLI  | * P37744 | POA6K3 | rmla1_ecoli | def_ecoli  |
| POA6K3 | DEF_ECOLI  | * P21888 | POA6K3 | syc_ecoli   | def_ecoli  |
| POA6K3 | DEF_ECOLI  | * P0A8A0 | POA6K3 | yebc_ecoli  | def_ecoli  |
| POA6K3 | DEF_ECOLI  | * P32141 | POA6K3 | yiht_ecoli  | def_ecoli  |
| POC0V0 | DEGP_ECOLI | * P0A6G7 | POC0V0 | clpp_ecoli  | degp_ecoli |
| POC0V0 | DEGP_ECOLI | * P0AAG8 | POC0V0 | mgla_ecoli  | degp_ecoli |
| POC0V0 | DEGP_ECOLI | * P0AG18 | POC0V0 | pure_ecoli  | degp_ecoli |
| POC0V0 | DEGP_ECOLI | * P0A7E9 | POC0V0 | pyrh_ecoli  | degp_ecoli |
| POC0V0 | DEGP_ECOLI | * P33228 | POC0V0 | rect_ecoli  | degp_ecoli |
| POA6K6 | DEOB_ECOLI | * P77489 | POA6K6 | yagr_ecoli  | deob_ecoli |
| POA6L0 | DEOC_ECOLI | * P27550 | POA6L0 | acsa_ecoli  | deoc_ecoli |
| POA6L0 | DEOC_ECOLI | * P76555 | POA6L0 | eutq_ecoli  | deoc_ecoli |

|        |            |          |        |             |            |
|--------|------------|----------|--------|-------------|------------|
| P0A6L0 | DEOC_ECOLI | * P28861 | P0A6L0 | fenr_ecoli  | deoc_ecoli |
| P0A6L0 | DEOC_ECOLI | * P64488 | P0A6L0 | year_ecoli  | deoc_ecoli |
| P0A6L0 | DEOC_ECOLI | * P31449 | P0A6L0 | yidl_ecoli  | deoc_ecoli |
| P0ABP8 | DEOD_ECOLI | * P0AD61 | P0ABP8 | kpyk1_ecoli | deod_ecoli |
| P76015 | DHAK_ECOLI | * P20083 | P76015 | pare_ecoli  | dhak_ecoli |
| P76015 | DHAK_ECOLI | * P0AAT6 | P76015 | ybeb_ecoli  | dhak_ecoli |
| P37349 | DHAM_ECOLI | none     |        |             |            |
| P76016 | DHAR_ECOLI | none     |        |             |            |
| P0A9Q9 | DHAS_ECOLI | none     |        |             |            |
| P00393 | DHNA_ECOLI | * P06282 | P00393 | cdh_ecoli   | dhna_ecoli |
| P00393 | DHNA_ECOLI | * P11454 | P00393 | entf_ecoli  | dhna_ecoli |
| P00393 | DHNA_ECOLI | * A8A6G7 | P00393 | oxaa_ecohs  | dhna_ecoli |
| P0AC13 | DHPS_ECOLI | * P11989 | P0AC13 | bglg_ecoli  | dhps_ecoli |
| P0AC41 | DHSA_ECOLI | * P11071 | P0AC41 | acek_ecoli  | dhna_ecoli |
| P0AC41 | DHSA_ECOLI | * P77731 | P0AC41 | alla_ecoli  | dhna_ecoli |
| P0AC41 | DHSA_ECOLI | * P0ACN4 | P0AC41 | allr_ecoli  | dhna_ecoli |
| P0AC41 | DHSA_ECOLI | * P0ACR0 | P0AC41 | alls_ecoli  | dhna_ecoli |
| P0AC41 | DHSA_ECOLI | * P77398 | P0AC41 | arna_ecoli  | dhna_ecoli |
| P0AC41 | DHSA_ECOLI | * P0A951 | P0AC41 | atda_ecoli  | dhna_ecoli |
| P0AC41 | DHSA_ECOLI | * P60584 | P0AC41 | caia_ecoli  | dhna_ecoli |
| P0AC41 | DHSA_ECOLI | * P31572 | P0AC41 | caib_ecoli  | dhna_ecoli |
| P0AC41 | DHSA_ECOLI | * P31551 | P0AC41 | caid_ecoli  | dhna_ecoli |
| P0AC41 | DHSA_ECOLI | * P0AE58 | P0AC41 | caif_ecoli  | dhna_ecoli |
| P0AC41 | DHSA_ECOLI | * P17315 | P0AC41 | cira_ecoli  | dhna_ecoli |
| P0AC41 | DHSA_ECOLI | * P63284 | P0AC41 | clpb_ecoli  | dhna_ecoli |
| P0AC41 | DHSA_ECOLI | * P0A6H1 | P0AC41 | clpx_ecoli  | dhna_ecoli |
| P0AC41 | DHSA_ECOLI | * P52086 | P0AC41 | cobc_ecoli  | dhna_ecoli |
| P0AC41 | DHSA_ECOLI | * Q59385 | P0AC41 | copa_ecoli  | dhna_ecoli |
| P0AC41 | DHSA_ECOLI | * P17846 | P0AC41 | cysi_ecoli  | dhna_ecoli |
| P0AC41 | DHSA_ECOLI | * P0ACF4 | P0AC41 | dbhb_ecoli  | dhna_ecoli |
| P0AC41 | DHSA_ECOLI | * P0AEC8 | P0AC41 | dcus_ecoli  | dhna_ecoli |
| P0AC41 | DHSA_ECOLI | * P06149 | P0AC41 | dld_ecoli   | dhna_ecoli |
| P0AC41 | DHSA_ECOLI | * P21189 | P0AC41 | dpo2_ecoli  | dhna_ecoli |
| P0AC41 | DHSA_ECOLI | * P0ABQ4 | P0AC41 | dyr_ecoli   | dhna_ecoli |
| P0AC41 | DHSA_ECOLI | * Q47129 | P0AC41 | fear_ecoli  | dhna_ecoli |
| P0AC41 | DHSA_ECOLI | * P68644 | P0AC41 | fixc_ecoli  | dhna_ecoli |
| P0AC41 | DHSA_ECOLI | * P0AEM0 | P0AC41 | fbxb_ecoli  | dhna_ecoli |

|        |            |          |        |            |            |
|--------|------------|----------|--------|------------|------------|
| POAC41 | DHSA_ECOLI | * P25798 | POAC41 | flif_ecoli | dhsa_ecoli |
| POAC41 | DHSA_ECOLI | * P05042 | POAC41 | fumc_ecoli | dhsa_ecoli |
| POAC41 | DHSA_ECOLI | * P0AEP7 | POAC41 | gcl_ecoli  | dhsa_ecoli |
| POAC41 | DHSA_ECOLI | * P77161 | POAC41 | glxr_ecoli | dhsa_ecoli |
| POAC41 | DHSA_ECOLI | * P77334 | POAC41 | gmr_ecoli  | dhsa_ecoli |
| POAC41 | DHSA_ECOLI | * P23871 | POAC41 | hemh_ecoli | dhsa_ecoli |
| POAC41 | DHSA_ECOLI | * P77319 | POAC41 | hscg_ecoli | dhsa_ecoli |
| POAC41 | DHSA_ECOLI | * P71229 | POAC41 | hyfr_ecoli | dhsa_ecoli |
| POAC41 | DHSA_ECOLI | * P0A715 | POAC41 | kdsa_ecoli | dhsa_ecoli |
| POAC41 | DHSA_ECOLI | * P04951 | POAC41 | kdsb_ecoli | dhsa_ecoli |
| POAC41 | DHSA_ECOLI | * P0A754 | POAC41 | keff_ecoli | dhsa_ecoli |
| POAC41 | DHSA_ECOLI | * P69451 | POAC41 | lcfa_ecoli | dhsa_ecoli |
| POAC41 | DHSA_ECOLI | * P10441 | POAC41 | lpxb_ecoli | dhsa_ecoli |
| POAC41 | DHSA_ECOLI | * P21645 | POAC41 | lpxd_ecoli | dhsa_ecoli |
| POAC41 | DHSA_ECOLI | * P05704 | POAC41 | mcp3_ecoli | dhsa_ecoli |
| POAC41 | DHSA_ECOLI | * P0AEI1 | POAC41 | miab_ecoli | dhsa_ecoli |
| POAC41 | DHSA_ECOLI | * P54746 | POAC41 | mngb_ecoli | dhsa_ecoli |
| POAC41 | DHSA_ECOLI | * P33940 | POAC41 | mgo_ecoli  | dhsa_ecoli |
| POAC41 | DHSA_ECOLI | * P0AF26 | POAC41 | narj_ecoli | dhsa_ecoli |
| POAC41 | DHSA_ECOLI | * P27896 | POAC41 | narq_ecoli | dhsa_ecoli |
| POAC41 | DHSA_ECOLI | * P06959 | POAC41 | odp2_ecoli | dhsa_ecoli |
| POAC41 | DHSA_ECOLI | * P77467 | POAC41 | paag_ecoli | dhsa_ecoli |
| POAC41 | DHSA_ECOLI | * P0A9J4 | POAC41 | pane_ecoli | dhsa_ecoli |
| POAC41 | DHSA_ECOLI | * P32674 | POAC41 | pfld_ecoli | dhsa_ecoli |
| POAC41 | DHSA_ECOLI | * P0A7B1 | POAC41 | ppk_ecoli  | dhsa_ecoli |
| POAC41 | DHSA_ECOLI | * P0A7H6 | POAC41 | recr_ecoli | dhsa_ecoli |
| POAC41 | DHSA_ECOLI | * P33228 | POAC41 | rect_ecoli | dhsa_ecoli |
| POAC41 | DHSA_ECOLI | * P0AEI4 | POAC41 | rimo_ecoli | dhsa_ecoli |
| POAC41 | DHSA_ECOLI | * P10442 | POAC41 | rnh2_ecoli | dhsa_ecoli |
| POAC41 | DHSA_ECOLI | * P0A8V2 | POAC41 | rpob_ecoli | dhsa_ecoli |
| POAC41 | DHSA_ECOLI | * P0A8T7 | POAC41 | rpoc_ecoli | dhsa_ecoli |
| POAC41 | DHSA_ECOLI | * P0A7V0 | POAC41 | rs2_ecoli  | dhsa_ecoli |
| POAC41 | DHSA_ECOLI | * P38035 | POAC41 | rtrc_ecoli | dhsa_ecoli |
| POAC41 | DHSA_ECOLI | * P77515 | POAC41 | stfq_ecoli | dhsa_ecoli |
| POAC41 | DHSA_ECOLI | * P0A836 | POAC41 | succ_ecoli | dhsa_ecoli |
| POAC41 | DHSA_ECOLI | * P0AGE9 | POAC41 | sucd_ecoli | dhsa_ecoli |
| POAC41 | DHSA_ECOLI | * P76041 | POAC41 | sucp_ecoli | dhsa_ecoli |
| POAC41 | DHSA_ECOLI | * P11875 | POAC41 | syr_ecoli  | dhsa_ecoli |
| POAC41 | DHSA_ECOLI | * P0AGJ9 | POAC41 | syy_ecoli  | dhsa_ecoli |
| POAC41 | DHSA_ECOLI | * P77712 | POAC41 | tesc_ecoli | dhsa_ecoli |
| POAC41 | DHSA_ECOLI | * P0AA25 | POAC41 | thio_ecoli | dhsa_ecoli |
| POAC41 | DHSA_ECOLI | * P0A850 | POAC41 | tig_ecoli  | dhsa_ecoli |
| POAC41 | DHSA_ECOLI | * P0A850 | POAC41 | tig_ecoli  | dhsa_ecoli |
| POAC41 | DHSA_ECOLI | * P39177 | POAC41 | uspg_ecoli | dhsa_ecoli |
| POAC41 | DHSA_ECOLI | * P0AAQ2 | POAC41 | yajd_ecoli | dhsa_ecoli |

|        |            |   |        |        |             |            |
|--------|------------|---|--------|--------|-------------|------------|
| P0AC41 | DHSA_ECOLI | * | P0AAR3 | P0AC41 | ybak_ecoli  | dhsa_ecoli |
| P0AC41 | DHSA_ECOLI | * | P77301 | P0AC41 | ybap_ecoli  | dhsa_ecoli |
| P0AC41 | DHSA_ECOLI | * | P33668 | P0AC41 | ybbc_ecoli  | dhsa_ecoli |
| P0AC41 | DHSA_ECOLI | * | P77316 | P0AC41 | ybdr_ecoli  | dhsa_ecoli |
| P0AC41 | DHSA_ECOLI | * | P0AAT9 | P0AC41 | ybel_ecoli  | dhsa_ecoli |
| P0AC41 | DHSA_ECOLI | * | P0A8R7 | P0AC41 | ycjf_ecoli  | dhsa_ecoli |
| P0AC41 | DHSA_ECOLI | * | P77615 | P0AC41 | ycjw_ecoli  | dhsa_ecoli |
| P0AC41 | DHSA_ECOLI | * | P77546 | P0AC41 | ydav_ecoli  | dhsa_ecoli |
| P0AC41 | DHSA_ECOLI | * | P76104 | P0AC41 | ydcg_ecoli  | dhsa_ecoli |
| P0AC41 | DHSA_ECOLI | * | P77260 | P0AC41 | ydfi_ecoli  | dhsa_ecoli |
| P0AC41 | DHSA_ECOLI | * | P77804 | P0AC41 | ydga_ecoli  | dhsa_ecoli |
| P0AC41 | DHSA_ECOLI | * | P77564 | P0AC41 | ydhw_ecoli  | dhsa_ecoli |
| P0AC41 | DHSA_ECOLI | * | P17994 | P0AC41 | yfaa_ecoli  | dhsa_ecoli |
| P0AC41 | DHSA_ECOLI | * | P76463 | P0AC41 | yfaq_ecoli  | dhsa_ecoli |
| P0AC41 | DHSA_ECOLI | * | P76594 | P0AC41 | yfiq_ecoli  | dhsa_ecoli |
| P0AC41 | DHSA_ECOLI | * | P52127 | P0AC41 | yfjl_ecoli  | dhsa_ecoli |
| P0AC41 | DHSA_ECOLI | * | Q46802 | P0AC41 | ygev_ecoli  | dhsa_ecoli |
| P0AC41 | DHSA_ECOLI | * | P77509 | P0AC41 | yphe_ecoli  | dhsa_ecoli |
| P06966 | DICA_ECOLI |   | none   |        |             |            |
| Q46857 | DKGA_ECOLI |   | none   |        |             |            |
| P0ABS1 | DKSA_ECOLI | * | P0AA25 | P0ABS1 | thio_ecoli  | dksa_ecoli |
| P0A9P0 | DLDH_ECOLI | * | P0A6A8 | P0A9P0 | acp_ecoli   | dldh_ecoli |
| P0A9P0 | DLDH_ECOLI | * | P0A6A8 | P0A9P0 | acp_ecoli   | dldh_ecoli |
| P0A9P0 | DLDH_ECOLI | * | P0AE67 | P0A9P0 | chey_ecoli  | dldh_ecoli |
| P0A9P0 | DLDH_ECOLI | * | P36995 | P0A9P0 | cspb_ecoli  | dldh_ecoli |
| P0A9P0 | DLDH_ECOLI | * | P36995 | P0A9P0 | cspb_ecoli  | dldh_ecoli |
| P0A9P0 | DLDH_ECOLI | * | P0AEE8 | P0A9P0 | dma_ecoli   | dldh_ecoli |
| P0A9P0 | DLDH_ECOLI | * | P0AEE8 | P0A9P0 | dma_ecoli   | dldh_ecoli |
| P0A9P0 | DLDH_ECOLI | * | P03004 | P0A9P0 | dnaa_ecoli  | dldh_ecoli |
| P0A9P0 | DLDH_ECOLI | * | P00582 | P0A9P0 | dpo1_ecoli  | dldh_ecoli |
| P0A9P0 | DLDH_ECOLI | * | P00582 | P0A9P0 | dpo1_ecoli  | dldh_ecoli |
| P0A9P0 | DLDH_ECOLI | * | P10443 | P0A9P0 | dpo3a_ecoli | dldh_ecoli |
| P0A9P0 | DLDH_ECOLI | * | P33371 | P0A9P0 | dusc_ecoli  | dldh_ecoli |
| P0A9P0 | DLDH_ECOLI | * | P0AB83 | P0A9P0 | end3_ecoli  | dldh_ecoli |
| P0A9P0 | DLDH_ECOLI | * | P0A6C1 | P0A9P0 | end4_ecoli  | dldh_ecoli |
| P0A9P0 | DLDH_ECOLI | * | P50465 | P0A9P0 | end8_ecoli  | dldh_ecoli |
| P0A9P0 | DLDH_ECOLI | * | P09030 | P0A9P0 | ex3_ecoli   | dldh_ecoli |
| P0A9P0 | DLDH_ECOLI | * | P04993 | P0A9P0 | ex5a_ecoli  | dldh_ecoli |
| P0A9P0 | DLDH_ECOLI | * | P08394 | P0A9P0 | ex5b_ecoli  | dldh_ecoli |
| P0A9P0 | DLDH_ECOLI | * | P76503 | P0A9P0 | fadi_ecoli  | dldh_ecoli |
| P0A9P0 | DLDH_ECOLI | * | P77399 | P0A9P0 | fadj_ecoli  | dldh_ecoli |

|        |            |   |        |        |              |            |
|--------|------------|---|--------|--------|--------------|------------|
| POA9P0 | DLDH_ECOLI | * | P32177 | POA9P0 | fdhd_ecoli   | dldh_ecoli |
| POA9P0 | DLDH_ECOLI | * | P0AEN8 | POA9P0 | fucm_ecoli   | dldh_ecoli |
| POA9P0 | DLDH_ECOLI | * | P0AES4 | POA9P0 | gyra_ecoli   | dldh_ecoli |
| POA9P0 | DLDH_ECOLI | * | P43329 | POA9P0 | hrpa_ecoli   | dldh_ecoli |
| POA9P0 | DLDH_ECOLI | * | P37024 | POA9P0 | hrpb_ecoli   | dldh_ecoli |
| POA9P0 | DLDH_ECOLI | * | P37024 | POA9P0 | hrpb_ecoli   | dldh_ecoli |
| POA9P0 | DLDH_ECOLI | * | P0AEV9 | POA9P0 | hyci_ecoli   | dldh_ecoli |
| POA9P0 | DLDH_ECOLI | * | P0C054 | POA9P0 | ibpa_ecoli   | dldh_ecoli |
| POA9P0 | DLDH_ECOLI | * | P0C058 | POA9P0 | ibpb_ecoli   | dldh_ecoli |
| POA9P0 | DLDH_ECOLI | * | P39346 | POA9P0 | idnd_ecoli   | dldh_ecoli |
| POA9P0 | DLDH_ECOLI | * | P08142 | POA9P0 | ilvb_ecoli   | dldh_ecoli |
| POA9P0 | DLDH_ECOLI | * | P08142 | POA9P0 | ilvb_ecoli   | dldh_ecoli |
| POA9P0 | DLDH_ECOLI | * | P37326 | POA9P0 | ints_ecoli   | dldh_ecoli |
| POA9P0 | DLDH_ECOLI | * | P0A9H3 | POA9P0 | ldci_ecoli   | dldh_ecoli |
| POA9P0 | DLDH_ECOLI | * | P25522 | POA9P0 | mnme_ecoli   | dldh_ecoli |
| POA9P0 | DLDH_ECOLI | * | P33937 | POA9P0 | napa_ecoli   | dldh_ecoli |
| POA9P0 | DLDH_ECOLI | * | P0AF26 | POA9P0 | narj_ecoli   | dldh_ecoli |
| POA9P0 | DLDH_ECOLI | * | P68739 | POA9P0 | nfi_ecoli    | dldh_ecoli |
| POA9P0 | DLDH_ECOLI | * | P0AFC0 | POA9P0 | nudb_ecoli   | dldh_ecoli |
| POA9P0 | DLDH_ECOLI | * | P0AFG3 | POA9P0 | odo1_ecoli   | dldh_ecoli |
| POA9P0 | DLDH_ECOLI | * | P0AFG3 | POA9P0 | odo1_ecoli   | dldh_ecoli |
| POA9P0 | DLDH_ECOLI | * | P0AFG6 | POA9P0 | odo2_ecoli   | dldh_ecoli |
| POA9P0 | DLDH_ECOLI | * | P06959 | POA9P0 | odp2_ecoli   | dldh_ecoli |
| POA9P0 | DLDH_ECOLI | * | P0AFH0 | POA9P0 | ogt_ecoli    | dldh_ecoli |
| POA9P0 | DLDH_ECOLI | * | P0AFH0 | POA9P0 | ogt_ecoli    | dldh_ecoli |
| POA9P0 | DLDH_ECOLI | * | P76086 | POA9P0 | paax_ecoli   | dldh_ecoli |
| POA9P0 | DLDH_ECOLI | * | P76086 | POA9P0 | paax_ecoli   | dldh_ecoli |
| POA9P0 | DLDH_ECOLI | * | P0AFI2 | POA9P0 | parc_ecoli   | dldh_ecoli |
| POA9P0 | DLDH_ECOLI | * | P0ACL9 | POA9P0 | pdhr_ecoli   | dldh_ecoli |
| POA9P0 | DLDH_ECOLI | * | P0A9K3 | POA9P0 | phol_ecoli   | dldh_ecoli |
| POA9P0 | DLDH_ECOLI | * | P0A9K3 | POA9P0 | phol_ecoli   | dldh_ecoli |
| POA9P0 | DLDH_ECOLI | * | P00490 | POA9P0 | phsm_ecoli   | dldh_ecoli |
| POA9P0 | DLDH_ECOLI | * | P00490 | POA9P0 | phsm_ecoli   | dldh_ecoli |
| POA9P0 | DLDH_ECOLI | * | P0ADI0 | POA9P0 | pinr_ecoli   | dldh_ecoli |
| POA9P0 | DLDH_ECOLI | * | P0A7A7 | POA9P0 | plsb_ecoli   | dldh_ecoli |
| POA9P0 | DLDH_ECOLI | * | P0A7B1 | POA9P0 | ppk_ecoli    | dldh_ecoli |
| POA9P0 | DLDH_ECOLI | * | Q7AJI3 | POA9P0 | q7aji3_ecolx | dldh_ecoli |
| POA9P0 | DLDH_ECOLI | * | P31473 | POA9P0 | rava_ecoli   | dldh_ecoli |
| POA9P0 | DLDH_ECOLI | * | P21893 | POA9P0 | recj_ecoli   | dldh_ecoli |
| POA9P0 | DLDH_ECOLI | * | P21893 | POA9P0 | recj_ecoli   | dldh_ecoli |
| POA9P0 | DLDH_ECOLI | * | P15043 | POA9P0 | recq_ecoli   | dldh_ecoli |
| POA9P0 | DLDH_ECOLI | * | P15043 | POA9P0 | recq_ecoli   | dldh_ecoli |
| POA9P0 | DLDH_ECOLI | * | P36979 | POA9P0 | rlmn_ecoli   | dldh_ecoli |
| POA9P0 | DLDH_ECOLI | * | P0AA39 | POA9P0 | rluc_ecoli   | dldh_ecoli |
| POA9P0 | DLDH_ECOLI | * | P0AA39 | POA9P0 | rluc_ecoli   | dldh_ecoli |



|        |            |          |        |                            |                            |
|--------|------------|----------|--------|----------------------------|----------------------------|
| POA9P0 | DLDH_ECOLI | * P0A7Y4 | POA9P0 | rnh_ecoli                  | dldh_ecoli                 |
| POA9P0 | DLDH_ECOLI | * P0A7Y8 | POA9P0 | rnpa_ecoli                 | dldh_ecoli                 |
| POA9P0 | DLDH_ECOLI | * P0A6U5 | POA9P0 | rsmg_ecoli                 | dldh_ecoli                 |
| POA9P0 | DLDH_ECOLI | * P0ABZ6 | POA9P0 | <a href="#">sura_ecoli</a> | <a href="#">dldh_ecoli</a> |
| POA9P0 | DLDH_ECOLI | * P08956 | POA9P0 | t1rk_ecoli                 | dldh_ecoli                 |
| POA9P0 | DLDH_ECOLI | * P08956 | POA9P0 | t1rk_ecoli                 | dldh_ecoli                 |
| POA9P0 | DLDH_ECOLI | * P19705 | POA9P0 | t1se_ecolx                 | dldh_ecoli                 |
| POA9P0 | DLDH_ECOLI | * P0AGG4 | POA9P0 | thio2_ecoli                | dldh_ecoli                 |
| POA9P0 | DLDH_ECOLI | * P06612 | POA9P0 | <a href="#">top1_ecoli</a> | <a href="#">dldh_ecoli</a> |
| POA9P0 | DLDH_ECOLI | * P14294 | POA9P0 | top3_ecoli                 | dldh_ecoli                 |
| POA9P0 | DLDH_ECOLI | * P14294 | POA9P0 | top3_ecoli                 | dldh_ecoli                 |
| POA9P0 | DLDH_ECOLI | * P0A8I5 | POA9P0 | <a href="#">trmb_ecoli</a> | <a href="#">dldh_ecoli</a> |
| POA9P0 | DLDH_ECOLI | * P0A887 | POA9P0 | ubie_ecoli                 | dldh_ecoli                 |
| POA9P0 | DLDH_ECOLI | * P0A9W0 | POA9P0 | <a href="#">ular_ecoli</a> | <a href="#">dldh_ecoli</a> |
| POA9P0 | DLDH_ECOLI | * P0A8F8 | POA9P0 | uvrb_ecoli                 | dldh_ecoli                 |
| POA9P0 | DLDH_ECOLI | * P0A8F8 | POA9P0 | uvrb_ecoli                 | dldh_ecoli                 |
| POA9P0 | DLDH_ECOLI | * P0A8G0 | POA9P0 | <a href="#">uvrc_ecoli</a> | <a href="#">dldh_ecoli</a> |
| POA9P0 | DLDH_ECOLI | * P0A8G0 | POA9P0 | <a href="#">uvrc_ecoli</a> | <a href="#">dldh_ecoli</a> |
| POA9P0 | DLDH_ECOLI | * P03018 | POA9P0 | uvrd_ecoli                 | dldh_ecoli                 |
| POA9P0 | DLDH_ECOLI | * P03018 | POA9P0 | uvrd_ecoli                 | dldh_ecoli                 |
| POA9P0 | DLDH_ECOLI | * P0AED5 | POA9P0 | uvry_ecoli                 | dldh_ecoli                 |
| POA9P0 | DLDH_ECOLI | * P0AAR3 | POA9P0 | ybak_ecoli                 | dldh_ecoli                 |
| POA9P0 | DLDH_ECOLI | * P0AAS7 | POA9P0 | ybcj_ecoli                 | dldh_ecoli                 |
| POA9P0 | DLDH_ECOLI | * P75767 | POA9P0 | ybhk_ecoli                 | dldh_ecoli                 |
| POA9P0 | DLDH_ECOLI | * P75767 | POA9P0 | ybhk_ecoli                 | dldh_ecoli                 |
| POA9P0 | DLDH_ECOLI | * P75829 | POA9P0 | <a href="#">ybjx_ecoli</a> | <a href="#">dldh_ecoli</a> |
| POA9P0 | DLDH_ECOLI | * P24188 | POA9P0 | ycea_ecoli                 | dldh_ecoli                 |
| POA9P0 | DLDH_ECOLI | * P75989 | POA9P0 | ycge_ecoli                 | dldh_ecoli                 |
| POA9P0 | DLDH_ECOLI | * P75990 | POA9P0 | ycgf_ecoli                 | dldh_ecoli                 |
| POA9P0 | DLDH_ECOLI | * P75990 | POA9P0 | ycgf_ecoli                 | dldh_ecoli                 |
| POA9P0 | DLDH_ECOLI | * P77302 | POA9P0 | ydam_ecoli                 | dldh_ecoli                 |
| POA9P0 | DLDH_ECOLI | * P77721 | POA9P0 | <a href="#">ydjf_ecoli</a> | <a href="#">dldh_ecoli</a> |
| POA9P0 | DLDH_ECOLI | * P33916 | POA9P0 | yejf_ecoli                 | dldh_ecoli                 |
| POA9P0 | DLDH_ECOLI | * P76594 | POA9P0 | yfiq_ecoli                 | dldh_ecoli                 |
| POA9P0 | DLDH_ECOLI | * Q46802 | POA9P0 | ygev_ecoli                 | dldh_ecoli                 |
| POA9P0 | DLDH_ECOLI | * P52037 | POA9P0 | ygff_ecoli                 | dldh_ecoli                 |
| POA9P0 | DLDH_ECOLI | * P45527 | POA9P0 | yhbu_ecoli                 | dldh_ecoli                 |
| POA9P0 | DLDH_ECOLI | * P23839 | POA9P0 | yicc_ecoli                 | dldh_ecoli                 |
| POA9P0 | DLDH_ECOLI | * P31806 | POA9P0 | <a href="#">yjef_ecoli</a> | <a href="#">dldh_ecoli</a> |
| POA9P0 | DLDH_ECOLI | * P31806 | POA9P0 | <a href="#">yjef_ecoli</a> | <a href="#">dldh_ecoli</a> |
| POA9P0 | DLDH_ECOLI | * P0AF90 | POA9P0 | <a href="#">yjgd_ecoli</a> | <a href="#">dldh_ecoli</a> |
| POA9P0 | DLDH_ECOLI | * P76170 | POA9P0 | ynfb_ecoli                 | dldh_ecoli                 |
| POA9P0 | DLDH_ECOLI | * P45465 | POA9P0 | yran_ecoli                 | dldh_ecoli                 |
| POA9P0 | DLDH_ECOLI | * P0A9X1 | POA9P0 | znuc_ecoli                 | dldh_ecoli                 |

|        |            |          |        |             |            |
|--------|------------|----------|--------|-------------|------------|
| P0AEE8 | DMA_ECOLI  | * P0AEW4 | P0AEE8 | icc_ecoli   | dma_ecoli  |
| P69853 | DMSD_ECOLI | none     |        |             |            |
| P08622 | DNAJ_ECOLI | * P0A991 | P08622 | alf1_ecoli  | dnaj_ecoli |
| P08622 | DNAJ_ECOLI | * P0A6D0 | P08622 | argr_ecoli  | dnaj_ecoli |
| P08622 | DNAJ_ECOLI | * P06610 | P08622 | btue_ecoli  | dnaj_ecoli |
| P08622 | DNAJ_ECOLI | * P0A964 | P08622 | chew_ecoli  | dnaj_ecoli |
| P08622 | DNAJ_ECOLI | * P0A9Y6 | P08622 | cspc_ecoli  | dnaj_ecoli |
| P08622 | DNAJ_ECOLI | * P0ABJ1 | P08622 | cyoa_ecoli  | dnaj_ecoli |
| P08622 | DNAJ_ECOLI | * P0A9P6 | P08622 | dead_ecoli  | dnaj_ecoli |
| P08622 | DNAJ_ECOLI | * P23840 | P08622 | dind_ecoli  | dnaj_ecoli |
| P08622 | DNAJ_ECOLI | * P03004 | P08622 | dnaa_ecoli  | dnaj_ecoli |
| P08622 | DNAJ_ECOLI | * P03004 | P08622 | dnaa_ecoli  | dnaj_ecoli |
| P08622 | DNAJ_ECOLI | * P0CE47 | P08622 | eftu1_ecoli | dnaj_ecoli |
| P08622 | DNAJ_ECOLI | * P77277 | P08622 | eutj_ecoli  | dnaj_ecoli |
| P08622 | DNAJ_ECOLI | * P04993 | P08622 | ex5a_ecoli  | dnaj_ecoli |
| P08622 | DNAJ_ECOLI | * P0AEM0 | P08622 | fkbx_ecoli  | dnaj_ecoli |
| P08622 | DNAJ_ECOLI | * P0ABH0 | P08622 | ftsa_ecoli  | dnaj_ecoli |
| P08622 | DNAJ_ECOLI | * P17169 | P08622 | glms_ecoli  | dnaj_ecoli |
| P08622 | DNAJ_ECOLI | * P13035 | P08622 | glpd_ecoli  | dnaj_ecoli |
| P08622 | DNAJ_ECOLI | * P0AES4 | P08622 | gyra_ecoli  | dnaj_ecoli |
| P08622 | DNAJ_ECOLI | * P0A6X3 | P08622 | hfq_ecoli   | dnaj_ecoli |
| P08622 | DNAJ_ECOLI | * P0A6H5 | P08622 | hslu_ecoli  | dnaj_ecoli |
| P08622 | DNAJ_ECOLI | * P0A6H5 | P08622 | hslu_ecoli  | dnaj_ecoli |
| P08622 | DNAJ_ECOLI | * P71229 | P08622 | hyfr_ecoli  | dnaj_ecoli |
| P08622 | DNAJ_ECOLI | * P0C054 | P08622 | ibpa_ecoli  | dnaj_ecoli |
| P08622 | DNAJ_ECOLI | * P04951 | P08622 | kdsb_ecoli  | dnaj_ecoli |
| P08622 | DNAJ_ECOLI | * P10441 | P08622 | lpxb_ecoli  | dnaj_ecoli |
| P08622 | DNAJ_ECOLI | * P21645 | P08622 | lpxd_ecoli  | dnaj_ecoli |
| P08622 | DNAJ_ECOLI | * P06993 | P08622 | malt_ecoli  | dnaj_ecoli |
| P08622 | DNAJ_ECOLI | * P0A817 | P08622 | metk_ecoli  | dnaj_ecoli |
| P08622 | DNAJ_ECOLI | * P0A817 | P08622 | metk_ecoli  | dnaj_ecoli |
| P08622 | DNAJ_ECOLI | * P0AEI1 | P08622 | miab_ecoli  | dnaj_ecoli |
| P08622 | DNAJ_ECOLI | * P0A9X4 | P08622 | mreb_ecoli  | dnaj_ecoli |
| P08622 | DNAJ_ECOLI | * P0A9X4 | P08622 | mreb_ecoli  | dnaj_ecoli |
| P08622 | DNAJ_ECOLI | * P09152 | P08622 | narg_ecoli  | dnaj_ecoli |
| P08622 | DNAJ_ECOLI | * P0AFG0 | P08622 | nusg_ecoli  | dnaj_ecoli |
| P08622 | DNAJ_ECOLI | * P77495 | P08622 | prpe_ecoli  | dnaj_ecoli |
| P08622 | DNAJ_ECOLI | * P42184 | P08622 | prsa_ecolx  | dnaj_ecoli |
| P08622 | DNAJ_ECOLI | * P42184 | P08622 | prsa_ecolx  | dnaj_ecoli |
| P08622 | DNAJ_ECOLI | * P0AAH0 | P08622 | pstb_ecoli  | dnaj_ecoli |
| P08622 | DNAJ_ECOLI | * P08839 | P08622 | pt1_ecoli   | dnaj_ecoli |
| P08622 | DNAJ_ECOLI | * P0A9M8 | P08622 | pta_ecoli   | dnaj_ecoli |
| P08622 | DNAJ_ECOLI | * P15254 | P08622 | pur4_ecoli  | dnaj_ecoli |

|        |            |   |        |        |             |            |
|--------|------------|---|--------|--------|-------------|------------|
| P08622 | DNAJ_ECOLI | * | P0A7E9 | P08622 | pyrh_ecoli  | dnaj_ecoli |
| P08622 | DNAJ_ECOLI | * | P21893 | P08622 | recj_ecoli  | dnaj_ecoli |
| P08622 | DNAJ_ECOLI | * | P0AFW0 | P08622 | rfah_ecoli  | dnaj_ecoli |
| P08622 | DNAJ_ECOLI | * | P36979 | P08622 | rlmn_ecoli  | dnaj_ecoli |
| P08622 | DNAJ_ECOLI | * | P36979 | P08622 | rlmn_ecoli  | dnaj_ecoli |
| P08622 | DNAJ_ECOLI | * | P0CG19 | P08622 | rnph_ecoli  | dnaj_ecoli |
| P08622 | DNAJ_ECOLI | * | P0A812 | P08622 | ruvb_ecoli  | dnaj_ecoli |
| P08622 | DNAJ_ECOLI | * | P0A812 | P08622 | ruvb_ecoli  | dnaj_ecoli |
| P08622 | DNAJ_ECOLI | * | P14081 | P08622 | selb_ecoli  | dnaj_ecoli |
| P08622 | DNAJ_ECOLI | * | P14081 | P08622 | selb_ecoli  | dnaj_ecoli |
| P08622 | DNAJ_ECOLI | * | P0A828 | P08622 | smg_ecoli   | dnaj_ecoli |
| P08622 | DNAJ_ECOLI | * | P21507 | P08622 | srmb_ecoli  | dnaj_ecoli |
| P08622 | DNAJ_ECOLI | * | P00960 | P08622 | syga_ecoli  | dnaj_ecoli |
| P08622 | DNAJ_ECOLI | * | P00960 | P08622 | syga_ecoli  | dnaj_ecoli |
| P08622 | DNAJ_ECOLI | * | P00956 | P08622 | syi_ecoli   | dnaj_ecoli |
| P08622 | DNAJ_ECOLI | * | P0AGG8 | P08622 | tidd_ecoli  | dnaj_ecoli |
| P08622 | DNAJ_ECOLI | * | P25534 | P08622 | ubih_ecoli  | dnaj_ecoli |
| P08622 | DNAJ_ECOLI | * | P0A9W0 | P08622 | ular_ecoli  | dnaj_ecoli |
| P08622 | DNAJ_ECOLI | * | P39177 | P08622 | uspg_ecoli  | dnaj_ecoli |
| P08622 | DNAJ_ECOLI | * | P39177 | P08622 | uspg_ecoli  | dnaj_ecoli |
| P08622 | DNAJ_ECOLI | * | P71296 | P08622 | yagm_ecoli  | dnaj_ecoli |
| P08622 | DNAJ_ECOLI | * | P0AAS7 | P08622 | ybcj_ecoli  | dnaj_ecoli |
| P08622 | DNAJ_ECOLI | * | P0AAS7 | P08622 | ybcj_ecoli  | dnaj_ecoli |
| P08622 | DNAJ_ECOLI | * | P75741 | P08622 | ybfl_ecoli  | dnaj_ecoli |
| P08622 | DNAJ_ECOLI | * | P75829 | P08622 | ybjx_ecoli  | dnaj_ecoli |
| P08622 | DNAJ_ECOLI | * | P75991 | P08622 | ycgz_ecoli  | dnaj_ecoli |
| P08622 | DNAJ_ECOLI | * | P76241 | P08622 | yeam_ecoli  | dnaj_ecoli |
| P08622 | DNAJ_ECOLI | * | P0A8A2 | P08622 | yeen_ecoli  | dnaj_ecoli |
| P08622 | DNAJ_ECOLI | * | P77196 | P08622 | yfcu_ecoli  | dnaj_ecoli |
| P08622 | DNAJ_ECOLI | * | P76594 | P08622 | yfiq_ecoli  | dnaj_ecoli |
| P08622 | DNAJ_ECOLI | * | P23839 | P08622 | yicc_ecoli  | dnaj_ecoli |
| P08622 | DNAJ_ECOLI | * | P76612 | P08622 | ypjb_ecoli  | dnaj_ecoli |
|        |            |   |        |        |             |            |
| P0A6Y8 | DNAK_ECOLI | * | P0ABD5 | P0A6Y8 | acca_ecoli  | dnak_ecoli |
| P0A6Y8 | DNAK_ECOLI | * | P24182 | P0A6Y8 | acc_c_ecoli | dnak_ecoli |
| P0A6Y8 | DNAK_ECOLI | * | P0A9Q5 | P0A6Y8 | accd_ecoli  | dnak_ecoli |
| P0A6Y8 | DNAK_ECOLI | * | P77580 | P0A6Y8 | acdh_ecoli  | dnak_ecoli |
| P0A6Y8 | DNAK_ECOLI | * | P39451 | P0A6Y8 | adh_p_ecoli | dnak_ecoli |
| P0A6Y8 | DNAK_ECOLI | * | P23872 | P0A6Y8 | aes_ecoli   | dnak_ecoli |
| P0A6Y8 | DNAK_ECOLI | * | P33224 | P0A6Y8 | aidb_ecoli  | dnak_ecoli |
| P0A6Y8 | DNAK_ECOLI | * | P33224 | P0A6Y8 | aidb_ecoli  | dnak_ecoli |
| P0A6Y8 | DNAK_ECOLI | * | P37685 | P0A6Y8 | aldb_ecoli  | dnak_ecoli |
| P0A6Y8 | DNAK_ECOLI | * | P0AB71 | P0A6Y8 | alf_ecoli   | dnak_ecoli |
| P0A6Y8 | DNAK_ECOLI | * | P0AB71 | P0A6Y8 | alf_ecoli   | dnak_ecoli |
| P0A6Y8 | DNAK_ECOLI | * | P0A991 | P0A6Y8 | alf1_ecoli  | dnak_ecoli |

|        |            |          |        |            |            |
|--------|------------|----------|--------|------------|------------|
| POA6Y8 | DNAK_ECOLI | * P39265 | POA6Y8 | alsb_ecoli | dnak_ecoli |
| POA6Y8 | DNAK_ECOLI | * P00811 | POA6Y8 | ampc_ecoli | dnak_ecoli |
| POA6Y8 | DNAK_ECOLI | * P02924 | POA6Y8 | araf_ecoli | dnak_ecoli |
| POA6Y8 | DNAK_ECOLI | * P37306 | POA6Y8 | arcc_ecoli | dnak_ecoli |
| POA6Y8 | DNAK_ECOLI | * P0AB91 | POA6Y8 | arog_ecoli | dnak_ecoli |
| POA6Y8 | DNAK_ECOLI | * P22106 | POA6Y8 | asnb_ecoli | dnak_ecoli |
| POA6Y8 | DNAK_ECOLI | * P0AC38 | POA6Y8 | aspa_ecoli | dnak_ecoli |
| POA6Y8 | DNAK_ECOLI | * P0AC38 | POA6Y8 | aspa_ecoli | dnak_ecoli |
| POA6Y8 | DNAK_ECOLI | * P0ABA4 | POA6Y8 | atpd_ecoli | dnak_ecoli |
| POA6Y8 | DNAK_ECOLI | * P0ABD8 | POA6Y8 | bccp_ecoli | dnak_ecoli |
| POA6Y8 | DNAK_ECOLI | * P17444 | POA6Y8 | beta_ecoli | dnak_ecoli |
| POA6Y8 | DNAK_ECOLI | * P12996 | POA6Y8 | biob_ecoli | dnak_ecoli |
| POA6Y8 | DNAK_ECOLI | * P31552 | POA6Y8 | caic_ecoli | dnak_ecoli |
| POA6Y8 | DNAK_ECOLI | * P31551 | POA6Y8 | caid_ecoli | dnak_ecoli |
| POA6Y8 | DNAK_ECOLI | * P36659 | POA6Y8 | cbpa_ecoli | dnak_ecoli |
| POA6Y8 | DNAK_ECOLI | * P36659 | POA6Y8 | cbpa_ecoli | dnak_ecoli |
| POA6Y8 | DNAK_ECOLI | * P36659 | POA6Y8 | cbpa_ecoli | dnak_ecoli |
| POA6Y8 | DNAK_ECOLI | * P0A6F9 | POA6Y8 | ch10_ecoli | dnak_ecoli |
| POA6Y8 | DNAK_ECOLI | * P0A6F9 | POA6Y8 | ch10_ecoli | dnak_ecoli |
| POA6Y8 | DNAK_ECOLI | * P0A6F5 | POA6Y8 | ch60_ecoli | dnak_ecoli |
| POA6Y8 | DNAK_ECOLI | * P07330 | POA6Y8 | cheb_ecoli | dnak_ecoli |
| POA6Y8 | DNAK_ECOLI | * P07364 | POA6Y8 | cher_ecoli | dnak_ecoli |
| POA6Y8 | DNAK_ECOLI | * P76213 | POA6Y8 | cho_ecoli  | dnak_ecoli |
| POA6Y8 | DNAK_ECOLI | * P0AE72 | POA6Y8 | chpr_ecoli | dnak_ecoli |
| POA6Y8 | DNAK_ECOLI | * P0ABH9 | POA6Y8 | clpa_ecoli | dnak_ecoli |
| POA6Y8 | DNAK_ECOLI | * P63284 | POA6Y8 | clpb_ecoli | dnak_ecoli |
| POA6Y8 | DNAK_ECOLI | * P0A6G7 | POA6Y8 | clpp_ecoli | dnak_ecoli |
| POA6Y8 | DNAK_ECOLI | * P0A6H1 | POA6Y8 | clpx_ecoli | dnak_ecoli |
| POA6Y8 | DNAK_ECOLI | * P0A6H1 | POA6Y8 | clpx_ecoli | dnak_ecoli |
| POA6Y8 | DNAK_ECOLI | * Q59385 | POA6Y8 | copa_ecoli | dnak_ecoli |
| POA6Y8 | DNAK_ECOLI | * P36649 | POA6Y8 | cueo_ecoli | dnak_ecoli |
| POA6Y8 | DNAK_ECOLI | * P00816 | POA6Y8 | cyns_ecoli | dnak_ecoli |
| POA6Y8 | DNAK_ECOLI | * P0ABJ1 | POA6Y8 | cyoa_ecoli | dnak_ecoli |
| POA6Y8 | DNAK_ECOLI | * P16700 | POA6Y8 | cysp_ecoli | dnak_ecoli |
| POA6Y8 | DNAK_ECOLI | * P0ACF0 | POA6Y8 | dbha_ecoli | dnak_ecoli |
| POA6Y8 | DNAK_ECOLI | * P0ACF0 | POA6Y8 | dbha_ecoli | dnak_ecoli |
| POA6Y8 | DNAK_ECOLI | * P0ACF4 | POA6Y8 | dbhb_ecoli | dnak_ecoli |
| POA6Y8 | DNAK_ECOLI | * P69908 | POA6Y8 | dcea_ecoli | dnak_ecoli |
| POA6Y8 | DNAK_ECOLI | * P69908 | POA6Y8 | dcea_ecoli | dnak_ecoli |
| POA6Y8 | DNAK_ECOLI | * P69908 | POA6Y8 | dcea_ecoli | dnak_ecoli |
| POA6Y8 | DNAK_ECOLI | * P69910 | POA6Y8 | dceb_ecoli | dnak_ecoli |
| POA6Y8 | DNAK_ECOLI | * P0A6J8 | POA6Y8 | ddla_ecoli | dnak_ecoli |
| POA6Y8 | DNAK_ECOLI | * P0C0V0 | POA6Y8 | degp_ecoli | dnak_ecoli |
| POA6Y8 | DNAK_ECOLI | * P0ACK5 | POA6Y8 | deor_ecoli | dnak_ecoli |
| POA6Y8 | DNAK_ECOLI | * P0A9Q9 | POA6Y8 | dhas_ecoli | dnak_ecoli |

|        |            |          |        |                             |                            |
|--------|------------|----------|--------|-----------------------------|----------------------------|
| POA6Y8 | DNAK_ECOLI | * P06966 | POA6Y8 | <a href="#">dica_ecoli</a>  | <a href="#">dnak_ecoli</a> |
| POA6Y8 | DNAK_ECOLI | * P06965 | POA6Y8 | <a href="#">dicc_ecoli</a>  | <a href="#">dnak_ecoli</a> |
| POA6Y8 | DNAK_ECOLI | * P23840 | POA6Y8 | <a href="#">dind_ecoli</a>  | <a href="#">dnak_ecoli</a> |
| POA6Y8 | DNAK_ECOLI | * P0AEF0 | POA6Y8 | <a href="#">dnac_ecoli</a>  | <a href="#">dnak_ecoli</a> |
| POA6Y8 | DNAK_ECOLI | * P08622 | POA6Y8 | <a href="#">dnaj_ecoli</a>  | <a href="#">dnak_ecoli</a> |
| POA6Y8 | DNAK_ECOLI | * P08622 | POA6Y8 | <a href="#">dnaj_ecoli</a>  | <a href="#">dnak_ecoli</a> |
| POA6Y8 | DNAK_ECOLI | * P08622 | POA6Y8 | <a href="#">dnaj_ecoli</a>  | <a href="#">dnak_ecoli</a> |
| POA6Y8 | DNAK_ECOLI | * P08622 | POA6Y8 | <a href="#">dnaj_ecoli</a>  | <a href="#">dnak_ecoli</a> |
| POA6Y8 | DNAK_ECOLI | * P08622 | POA6Y8 | <a href="#">dnaj_ecoli</a>  | <a href="#">dnak_ecoli</a> |
| POA6Y8 | DNAK_ECOLI | * P10443 | POA6Y8 | <a href="#">dpo3a_ecoli</a> | <a href="#">dnak_ecoli</a> |
| POA6Y8 | DNAK_ECOLI | * P37313 | POA6Y8 | <a href="#">dppf_ecoli</a>  | <a href="#">dnak_ecoli</a> |
| POA6Y8 | DNAK_ECOLI | * P77202 | POA6Y8 | <a href="#">dsbg_ecoli</a>  | <a href="#">dnak_ecoli</a> |
| POA6Y8 | DNAK_ECOLI | * P0CE47 | POA6Y8 | <a href="#">eftu1_ecoli</a> | <a href="#">dnak_ecoli</a> |
| POA6Y8 | DNAK_ECOLI | * P0AB83 | POA6Y8 | <a href="#">end3_ecoli</a>  | <a href="#">dnak_ecoli</a> |
| POA6Y8 | DNAK_ECOLI | * P0A6P9 | POA6Y8 | <a href="#">eno_ecoli</a>   | <a href="#">dnak_ecoli</a> |
| POA6Y8 | DNAK_ECOLI | * P0A6P9 | POA6Y8 | <a href="#">eno_ecoli</a>   | <a href="#">dnak_ecoli</a> |
| POA6Y8 | DNAK_ECOLI | * P15047 | POA6Y8 | <a href="#">enta_ecoli</a>  | <a href="#">dnak_ecoli</a> |
| POA6Y8 | DNAK_ECOLI | * P19636 | POA6Y8 | <a href="#">eutc_ecoli</a>  | <a href="#">dnak_ecoli</a> |
| POA6Y8 | DNAK_ECOLI | * P76556 | POA6Y8 | <a href="#">eutp_ecoli</a>  | <a href="#">dnak_ecoli</a> |
| POA6Y8 | DNAK_ECOLI | * P0AAI5 | POA6Y8 | <a href="#">fabf_ecoli</a>  | <a href="#">dnak_ecoli</a> |
| POA6Y8 | DNAK_ECOLI | * P0AAI5 | POA6Y8 | <a href="#">fabf_ecoli</a>  | <a href="#">dnak_ecoli</a> |
| POA6Y8 | DNAK_ECOLI | * P07658 | POA6Y8 | <a href="#">fdhf_ecoli</a>  | <a href="#">dnak_ecoli</a> |
| POA6Y8 | DNAK_ECOLI | * Q47208 | POA6Y8 | <a href="#">fdra_ecoli</a>  | <a href="#">dnak_ecoli</a> |
| POA6Y8 | DNAK_ECOLI | * P0AEL6 | POA6Y8 | <a href="#">fepb_ecoli</a>  | <a href="#">dnak_ecoli</a> |
| POA6Y8 | DNAK_ECOLI | * P23878 | POA6Y8 | <a href="#">fepc_ecoli</a>  | <a href="#">dnak_ecoli</a> |
| POA6Y8 | DNAK_ECOLI | * P0A6R3 | POA6Y8 | <a href="#">fis_ecoli</a>   | <a href="#">dnak_ecoli</a> |
| POA6Y8 | DNAK_ECOLI | * P60566 | POA6Y8 | <a href="#">fixa_ecoli</a>  | <a href="#">dnak_ecoli</a> |
| POA6Y8 | DNAK_ECOLI | * P31574 | POA6Y8 | <a href="#">fixb_ecoli</a>  | <a href="#">dnak_ecoli</a> |
| POA6Y8 | DNAK_ECOLI | * P0AEM0 | POA6Y8 | <a href="#">fkbx_ecoli</a>  | <a href="#">dnak_ecoli</a> |
| POA6Y8 | DNAK_ECOLI | * P75938 | POA6Y8 | <a href="#">flgf_ecoli</a>  | <a href="#">dnak_ecoli</a> |
| POA6Y8 | DNAK_ECOLI | * P0AEM4 | POA6Y8 | <a href="#">flgm_ecoli</a>  | <a href="#">dnak_ecoli</a> |
| POA6Y8 | DNAK_ECOLI | * P0A8S9 | POA6Y8 | <a href="#">flhd_ecoli</a>  | <a href="#">dnak_ecoli</a> |
| POA6Y8 | DNAK_ECOLI | * P04949 | POA6Y8 | <a href="#">flic_ecoli</a>  | <a href="#">dnak_ecoli</a> |
| POA6Y8 | DNAK_ECOLI | * P31068 | POA6Y8 | <a href="#">flih_ecoli</a>  | <a href="#">dnak_ecoli</a> |
| POA6Y8 | DNAK_ECOLI | * P52613 | POA6Y8 | <a href="#">flij_ecoli</a>  | <a href="#">dnak_ecoli</a> |
| POA6Y8 | DNAK_ECOLI | * P52614 | POA6Y8 | <a href="#">flik_ecoli</a>  | <a href="#">dnak_ecoli</a> |
| POA6Y8 | DNAK_ECOLI | * P77609 | POA6Y8 | <a href="#">flxa_ecoli</a>  | <a href="#">dnak_ecoli</a> |
| POA6Y8 | DNAK_ECOLI | * P08192 | POA6Y8 | <a href="#">folc_ecoli</a>  | <a href="#">dnak_ecoli</a> |
| POA6Y8 | DNAK_ECOLI | * P24186 | POA6Y8 | <a href="#">fold_ecoli</a>  | <a href="#">dnak_ecoli</a> |
| POA6Y8 | DNAK_ECOLI | * P0ACP1 | POA6Y8 | <a href="#">frur_ecoli</a>  | <a href="#">dnak_ecoli</a> |
| POA6Y8 | DNAK_ECOLI | * P0ABH0 | POA6Y8 | <a href="#">ftsa_ecoli</a>  | <a href="#">dnak_ecoli</a> |
| POA6Y8 | DNAK_ECOLI | * P0A9A6 | POA6Y8 | <a href="#">ftsz_ecoli</a>  | <a href="#">dnak_ecoli</a> |
| POA6Y8 | DNAK_ECOLI | * P05042 | POA6Y8 | <a href="#">fumc_ecoli</a>  | <a href="#">dnak_ecoli</a> |
| POA6Y8 | DNAK_ECOLI | * P0A9B2 | POA6Y8 | <a href="#">g3p1_ecoli</a>  | <a href="#">dnak_ecoli</a> |
| POA6Y8 | DNAK_ECOLI | * P0A9B2 | POA6Y8 | <a href="#">g3p1_ecoli</a>  | <a href="#">dnak_ecoli</a> |



|        |            |          |        |                             |                            |
|--------|------------|----------|--------|-----------------------------|----------------------------|
| POA6Y8 | DNAK_ECOLI | * P0AC53 | POA6Y8 | <a href="#">g6pd_ecoli</a>  | <a href="#">dnak_ecoli</a> |
| POA6Y8 | DNAK_ECOLI | * P0A9C3 | POA6Y8 | <a href="#">galm_ecoli</a>  | <a href="#">dnak_ecoli</a> |
| POA6Y8 | DNAK_ECOLI | * P0A9S3 | POA6Y8 | <a href="#">gatd_ecoli</a>  | <a href="#">dnak_ecoli</a> |
| POA6Y8 | DNAK_ECOLI | * P36930 | POA6Y8 | <a href="#">gatr_ecoli</a>  | <a href="#">dnak_ecoli</a> |
| POA6Y8 | DNAK_ECOLI | * P0C8J6 | POA6Y8 | <a href="#">gaty_ecoli</a>  | <a href="#">dnak_ecoli</a> |
| POA6Y8 | DNAK_ECOLI | * P0C8J6 | POA6Y8 | <a href="#">gaty_ecoli</a>  | <a href="#">dnak_ecoli</a> |
| POA6Y8 | DNAK_ECOLI | * P0AC55 | POA6Y8 | <a href="#">glnk_ecoli</a>  | <a href="#">dnak_ecoli</a> |
| POA6Y8 | DNAK_ECOLI | * P10346 | POA6Y8 | <a href="#">glnq_ecoli</a>  | <a href="#">dnak_ecoli</a> |
| POA6Y8 | DNAK_ECOLI | * P68688 | POA6Y8 | <a href="#">glrx1_ecoli</a> | <a href="#">dnak_ecoli</a> |
| POA6Y8 | DNAK_ECOLI | * P0AAG3 | POA6Y8 | <a href="#">gltl_ecoli</a>  | <a href="#">dnak_ecoli</a> |
| POA6Y8 | DNAK_ECOLI | * P0A6W5 | POA6Y8 | <a href="#">grea_ecoli</a>  | <a href="#">dnak_ecoli</a> |
| POA6Y8 | DNAK_ECOLI | * P09372 | POA6Y8 | <a href="#">grpe_ecoli</a>  | <a href="#">dnak_ecoli</a> |
| POA6Y8 | DNAK_ECOLI | * P09372 | POA6Y8 | <a href="#">grpe_ecoli</a>  | <a href="#">dnak_ecoli</a> |
| POA6Y8 | DNAK_ECOLI | * P09372 | POA6Y8 | <a href="#">grpe_ecoli</a>  | <a href="#">dnak_ecoli</a> |
| POA6Y8 | DNAK_ECOLI | * P0AES4 | POA6Y8 | <a href="#">gyra_ecoli</a>  | <a href="#">dnak_ecoli</a> |
| POA6Y8 | DNAK_ECOLI | * P0ABW0 | POA6Y8 | <a href="#">hcac_ecoli</a>  | <a href="#">dnak_ecoli</a> |
| POA6Y8 | DNAK_ECOLI | * P15038 | POA6Y8 | <a href="#">held_ecoli</a>  | <a href="#">dnak_ecoli</a> |
| POA6Y8 | DNAK_ECOLI | * P15038 | POA6Y8 | <a href="#">held_ecoli</a>  | <a href="#">dnak_ecoli</a> |
| POA6Y8 | DNAK_ECOLI | * P0A6X3 | POA6Y8 | <a href="#">hfq_ecoli</a>   | <a href="#">dnak_ecoli</a> |
| POA6Y8 | DNAK_ECOLI | * P0ACE7 | POA6Y8 | <a href="#">hint_ecoli</a>  | <a href="#">dnak_ecoli</a> |
| POA6Y8 | DNAK_ECOLI | * P10371 | POA6Y8 | <a href="#">his4_ecoli</a>  | <a href="#">dnak_ecoli</a> |
| POA6Y8 | DNAK_ECOLI | * P67910 | POA6Y8 | <a href="#">hldd_ecoli</a>  | <a href="#">dnak_ecoli</a> |
| POA6Y8 | DNAK_ECOLI | * P36645 | POA6Y8 | <a href="#">hofb_ecoli</a>  | <a href="#">dnak_ecoli</a> |
| POA6Y8 | DNAK_ECOLI | * P28630 | POA6Y8 | <a href="#">hola_ecoli</a>  | <a href="#">dnak_ecoli</a> |
| POA6Y8 | DNAK_ECOLI | * P28905 | POA6Y8 | <a href="#">holc_ecoli</a>  | <a href="#">dnak_ecoli</a> |
| POA6Y8 | DNAK_ECOLI | * P0ABS8 | POA6Y8 | <a href="#">hole_ecoli</a>  | <a href="#">dnak_ecoli</a> |
| POA6Y8 | DNAK_ECOLI | * P0ABS8 | POA6Y8 | <a href="#">hole_ecoli</a>  | <a href="#">dnak_ecoli</a> |
| POA6Y8 | DNAK_ECOLI | * P37024 | POA6Y8 | <a href="#">hrpb_ecoli</a>  | <a href="#">dnak_ecoli</a> |
| POA6Y8 | DNAK_ECOLI | * P0ACG8 | POA6Y8 | <a href="#">hslr_ecoli</a>  | <a href="#">dnak_ecoli</a> |
| POA6Y8 | DNAK_ECOLI | * P0A6H5 | POA6Y8 | <a href="#">hslu_ecoli</a>  | <a href="#">dnak_ecoli</a> |
| POA6Y8 | DNAK_ECOLI | * P0A6H5 | POA6Y8 | <a href="#">hslu_ecoli</a>  | <a href="#">dnak_ecoli</a> |
| POA6Y8 | DNAK_ECOLI | * P19932 | POA6Y8 | <a href="#">hyaf_ecoli</a>  | <a href="#">dnak_ecoli</a> |
| POA6Y8 | DNAK_ECOLI | * P0A705 | POA6Y8 | <a href="#">if2_ecoli</a>   | <a href="#">dnak_ecoli</a> |
| POA6Y8 | DNAK_ECOLI | * P0A6X7 | POA6Y8 | <a href="#">ihfa_ecoli</a>  | <a href="#">dnak_ecoli</a> |
| POA6Y8 | DNAK_ECOLI | * P39347 | POA6Y8 | <a href="#">intb_ecoli</a>  | <a href="#">dnak_ecoli</a> |
| POA6Y8 | DNAK_ECOLI | * P0A7A9 | POA6Y8 | <a href="#">ipyr_ecoli</a>  | <a href="#">dnak_ecoli</a> |
| POA6Y8 | DNAK_ECOLI | * P0A6B7 | POA6Y8 | <a href="#">iscs_ecoli</a>  | <a href="#">dnak_ecoli</a> |
| POA6Y8 | DNAK_ECOLI | * P22939 | POA6Y8 | <a href="#">ispa_ecoli</a>  | <a href="#">dnak_ecoli</a> |
| POA6Y8 | DNAK_ECOLI | * P62623 | POA6Y8 | <a href="#">isph_ecoli</a>  | <a href="#">dnak_ecoli</a> |
| POA6Y8 | DNAK_ECOLI | * P04951 | POA6Y8 | <a href="#">kdsb_ecoli</a>  | <a href="#">dnak_ecoli</a> |
| POA6Y8 | DNAK_ECOLI | * P0AD61 | POA6Y8 | <a href="#">kpyk1_ecoli</a> | <a href="#">dnak_ecoli</a> |
| POA6Y8 | DNAK_ECOLI | * P21599 | POA6Y8 | <a href="#">kpyk2_ecoli</a> | <a href="#">dnak_ecoli</a> |
| POA6Y8 | DNAK_ECOLI | * P09151 | POA6Y8 | <a href="#">leu1_ecoli</a>  | <a href="#">dnak_ecoli</a> |
| POA6Y8 | DNAK_ECOLI | * P0A6A6 | POA6Y8 | <a href="#">leuc_ecoli</a>  | <a href="#">dnak_ecoli</a> |
| POA6Y8 | DNAK_ECOLI | * P30126 | POA6Y8 | <a href="#">leud_ecoli</a>  | <a href="#">dnak_ecoli</a> |



|        |            |          |        |              |            |
|--------|------------|----------|--------|--------------|------------|
| POA6Y8 | DNAK_ECOLI | * P0AC81 | POA6Y8 | lgul_ecoli   | dnak_ecoli |
| POA6Y8 | DNAK_ECOLI | * P0AC81 | POA6Y8 | lgul_ecoli   | dnak_ecoli |
| POA6Y8 | DNAK_ECOLI | * P60716 | POA6Y8 | lipa_ecoli   | dnak_ecoli |
| POA6Y8 | DNAK_ECOLI | * P45578 | POA6Y8 | luxs_ecoli   | dnak_ecoli |
| POA6Y8 | DNAK_ECOLI | * P77791 | POA6Y8 | maa_ecoli    | dnak_ecoli |
| POA6Y8 | DNAK_ECOLI | * P21517 | POA6Y8 | malz_ecoli   | dnak_ecoli |
| POA6Y8 | DNAK_ECOLI | * P24175 | POA6Y8 | manb_ecoli   | dnak_ecoli |
| POA6Y8 | DNAK_ECOLI | * P77188 | POA6Y8 | matc_ecoli   | dnak_ecoli |
| POA6Y8 | DNAK_ECOLI | * P38051 | POA6Y8 | menf_ecoli   | dnak_ecoli |
| POA6Y8 | DNAK_ECOLI | * P0A817 | POA6Y8 | metk_ecoli   | dnak_ecoli |
| POA6Y8 | DNAK_ECOLI | * P30750 | POA6Y8 | metn_ecoli   | dnak_ecoli |
| POA6Y8 | DNAK_ECOLI | * P28635 | POA6Y8 | metq_ecoli   | dnak_ecoli |
| POA6Y8 | DNAK_ECOLI | * P0AEI1 | POA6Y8 | miab_ecoli   | dnak_ecoli |
| POA6Y8 | DNAK_ECOLI | * P0ADV7 | POA6Y8 | mlac_ecoli   | dnak_ecoli |
| POA6Y8 | DNAK_ECOLI | * P63386 | POA6Y8 | mlaf_ecoli   | dnak_ecoli |
| POA6Y8 | DNAK_ECOLI | * P28224 | POA6Y8 | mlic_ecoli   | dnak_ecoli |
| POA6Y8 | DNAK_ECOLI | * Q47690 | POA6Y8 | mmum_ecoli   | dnak_ecoli |
| POA6Y8 | DNAK_ECOLI | * P12282 | POA6Y8 | moeb_ecoli   | dnak_ecoli |
| POA6Y8 | DNAK_ECOLI | * P0AF03 | POA6Y8 | mog_ecoli    | dnak_ecoli |
| POA6Y8 | DNAK_ECOLI | * P0ACV6 | POA6Y8 | mpaa_ecoli   | dnak_ecoli |
| POA6Y8 | DNAK_ECOLI | * P0A9X4 | POA6Y8 | mreb_ecoli   | dnak_ecoli |
| POA6Y8 | DNAK_ECOLI | * P0A9X4 | POA6Y8 | mreb_ecoli   | dnak_ecoli |
| POA6Y8 | DNAK_ECOLI | * P0AF12 | POA6Y8 | mtnn_ecoli   | dnak_ecoli |
| POA6Y8 | DNAK_ECOLI | * P17952 | POA6Y8 | murc_ecoli   | dnak_ecoli |
| POA6Y8 | DNAK_ECOLI | * P22188 | POA6Y8 | mure_ecoli   | dnak_ecoli |
| POA6Y8 | DNAK_ECOLI | * P23367 | POA6Y8 | mutl_ecoli   | dnak_ecoli |
| POA6Y8 | DNAK_ECOLI | * P17802 | POA6Y8 | muty_ecoli   | dnak_ecoli |
| POA6Y8 | DNAK_ECOLI | * P30011 | POA6Y8 | nadc_ecoli   | dnak_ecoli |
| POA6Y8 | DNAK_ECOLI | * P0A759 | POA6Y8 | nagb_ecoli   | dnak_ecoli |
| POA6Y8 | DNAK_ECOLI | * P0A9I5 | POA6Y8 | napd_ecoli   | dnak_ecoli |
| POA6Y8 | DNAK_ECOLI | * P27896 | POA6Y8 | narq_ecoli   | dnak_ecoli |
| POA6Y8 | DNAK_ECOLI | * P0A763 | POA6Y8 | ndk_ecoli    | dnak_ecoli |
| POA6Y8 | DNAK_ECOLI | * P31600 | POA6Y8 | nfra_ecoli   | dnak_ecoli |
| POA6Y8 | DNAK_ECOLI | * P17117 | POA6Y8 | nfsa_ecoli   | dnak_ecoli |
| POA6Y8 | DNAK_ECOLI | * P0ACD4 | POA6Y8 | nifu_ecoli   | dnak_ecoli |
| POA6Y8 | DNAK_ECOLI | * P33593 | POA6Y8 | nikd_ecoli   | dnak_ecoli |
| POA6Y8 | DNAK_ECOLI | * P33593 | POA6Y8 | nikd_ecoli   | dnak_ecoli |
| POA6Y8 | DNAK_ECOLI | * P33594 | POA6Y8 | nike_ecoli   | dnak_ecoli |
| POA6Y8 | DNAK_ECOLI | * P04846 | POA6Y8 | nlpa_ecoli   | dnak_ecoli |
| POA6Y8 | DNAK_ECOLI | * P0AC65 | POA6Y8 | nrhd_ecoli   | dnak_ecoli |
| POA6Y8 | DNAK_ECOLI | * P0AFC0 | POA6Y8 | nudb_ecoli   | dnak_ecoli |
| POA6Y8 | DNAK_ECOLI | * P0AFD1 | POA6Y8 | nuoe_ecoli   | dnak_ecoli |
| POA6Y8 | DNAK_ECOLI | * P76356 | POA6Y8 | p76358_ecoli | dnak_ecoli |
| POA6Y8 | DNAK_ECOLI | * P76078 | POA6Y8 | paab_ecoli   | dnak_ecoli |
| POA6Y8 | DNAK_ECOLI | * P31663 | POA6Y8 | panc_ecoli   | dnak_ecoli |

|        |            |          |        |              |            |
|--------|------------|----------|--------|--------------|------------|
| POA6Y8 | DNAK_ECOLI | * P05459 | POA6Y8 | pdx_b_ecoli  | dnak_ecoli |
| POA6Y8 | DNAK_ECOLI | * P40191 | POA6Y8 | pdxk_ecoli   | dnak_ecoli |
| POA6Y8 | DNAK_ECOLI | * P15288 | POA6Y8 | pepd_ecoli   | dnak_ecoli |
| POA6Y8 | DNAK_ECOLI | * P0A799 | POA6Y8 | pgk_ecoli    | dnak_ecoli |
| POA6Y8 | DNAK_ECOLI | * P00634 | POA6Y8 | ppb_ecoli    | dnak_ecoli |
| POA6Y8 | DNAK_ECOLI | * P23869 | POA6Y8 | ppib_ecoli   | dnak_ecoli |
| POA6Y8 | DNAK_ECOLI | * P0A7B3 | POA6Y8 | ppnk_ecoli   | dnak_ecoli |
| POA6Y8 | DNAK_ECOLI | * P31828 | POA6Y8 | pqql_ecoli   | dnak_ecoli |
| POA6Y8 | DNAK_ECOLI | * P07013 | POA6Y8 | prib_ecoli   | dnak_ecoli |
| POA6Y8 | DNAK_ECOLI | * P42184 | POA6Y8 | prsa_ecolx   | dnak_ecoli |
| POA6Y8 | DNAK_ECOLI | * P0A7D7 | POA6Y8 | pur7_ecoli   | dnak_ecoli |
| POA6Y8 | DNAK_ECOLI | * P0A7D7 | POA6Y8 | pur7_ecoli   | dnak_ecoli |
| POA6Y8 | DNAK_ECOLI | * P09546 | POA6Y8 | puta_ecoli   | dnak_ecoli |
| POA6Y8 | DNAK_ECOLI | * P0A7E9 | POA6Y8 | pyrh_ecoli   | dnak_ecoli |
| POA6Y8 | DNAK_ECOLI | * Q9F557 | POA6Y8 | q9f557_ecolx | dnak_ecoli |
| POA6Y8 | DNAK_ECOLI | * P28304 | POA6Y8 | qor1_ecoli   | dnak_ecoli |
| POA6Y8 | DNAK_ECOLI | * P0A7F9 | POA6Y8 | quea_ecoli   | dnak_ecoli |
| POA6Y8 | DNAK_ECOLI | * P77756 | POA6Y8 | quec_ecoli   | dnak_ecoli |
| POA6Y8 | DNAK_ECOLI | * P77756 | POA6Y8 | quec_ecoli   | dnak_ecoli |
| POA6Y8 | DNAK_ECOLI | * P76062 | POA6Y8 | racr_ecoli   | dnak_ecoli |
| POA6Y8 | DNAK_ECOLI | * P31473 | POA6Y8 | rava_ecoli   | dnak_ecoli |
| POA6Y8 | DNAK_ECOLI | * P31473 | POA6Y8 | rava_ecoli   | dnak_ecoli |
| POA6Y8 | DNAK_ECOLI | * P02925 | POA6Y8 | rbsb_ecoli   | dnak_ecoli |
| POA6Y8 | DNAK_ECOLI | * P69405 | POA6Y8 | rca_ecoli    | dnak_ecoli |
| POA6Y8 | DNAK_ECOLI | * P69407 | POA6Y8 | rca_ecoli    | dnak_ecoli |
| POA6Y8 | DNAK_ECOLI | * P69411 | POA6Y8 | rca_ecoli    | dnak_ecoli |
| POA6Y8 | DNAK_ECOLI | * P21893 | POA6Y8 | recj_ecoli   | dnak_ecoli |
| POA6Y8 | DNAK_ECOLI | * P0C079 | POA6Y8 | relb_ecoli   | dnak_ecoli |
| POA6Y8 | DNAK_ECOLI | * P0A7I0 | POA6Y8 | rf1_ecoli    | dnak_ecoli |
| POA6Y8 | DNAK_ECOLI | * P0A8J8 | POA6Y8 | rhlb_ecoli   | dnak_ecoli |
| POA6Y8 | DNAK_ECOLI | * P16918 | POA6Y8 | rhsc_ecoli   | dnak_ecoli |
| POA6Y8 | DNAK_ECOLI | * P24211 | POA6Y8 | rhse_ecoli   | dnak_ecoli |
| POA6Y8 | DNAK_ECOLI | * P24211 | POA6Y8 | rhse_ecoli   | dnak_ecoli |
| POA6Y8 | DNAK_ECOLI | * P45748 | POA6Y8 | rimn_ecoli   | dnak_ecoli |
| POA6Y8 | DNAK_ECOLI | * P0AEI4 | POA6Y8 | rimo_ecoli   | dnak_ecoli |
| POA6Y8 | DNAK_ECOLI | * P69924 | POA6Y8 | rir2_ecoli   | dnak_ecoli |
| POA6Y8 | DNAK_ECOLI | * P0A7J3 | POA6Y8 | rl10_ecoli   | dnak_ecoli |
| POA6Y8 | DNAK_ECOLI | * P0A7J7 | POA6Y8 | rl11_ecoli   | dnak_ecoli |
| POA6Y8 | DNAK_ECOLI | * P60422 | POA6Y8 | rl2_ecoli    | dnak_ecoli |
| POA6Y8 | DNAK_ECOLI | * P68919 | POA6Y8 | rl25_ecoli   | dnak_ecoli |
| POA6Y8 | DNAK_ECOLI | * P60438 | POA6Y8 | rl3_ecoli    | dnak_ecoli |
| POA6Y8 | DNAK_ECOLI | * P0A7N9 | POA6Y8 | rl33_ecoli   | dnak_ecoli |
| POA6Y8 | DNAK_ECOLI | * P60723 | POA6Y8 | rl4_ecoli    | dnak_ecoli |
| POA6Y8 | DNAK_ECOLI | * P0A7R1 | POA6Y8 | rl9_ecoli    | dnak_ecoli |
| POA6Y8 | DNAK_ECOLI | * P21513 | POA6Y8 | rne_ecoli    | dnak_ecoli |

|        |            |   |        |        |            |            |
|--------|------------|---|--------|--------|------------|------------|
| POA6Y8 | DNAK_ECOLI | * | P21513 | POA6Y8 | rne_ecoli  | dnak_ecoli |
| POA6Y8 | DNAK_ECOLI | * | P21513 | POA6Y8 | rne_ecoli  | dnak_ecoli |
| POA6Y8 | DNAK_ECOLI | * | P21513 | POA6Y8 | rne_ecoli  | dnak_ecoli |
| POA6Y8 | DNAK_ECOLI | * | P21513 | POA6Y8 | rne_ecoli  | dnak_ecoli |
| POA6Y8 | DNAK_ECOLI | * | P21513 | POA6Y8 | rne_ecoli  | dnak_ecoli |
| POA6Y8 | DNAK_ECOLI | * | P21513 | POA6Y8 | rne_ecoli  | dnak_ecoli |
| POA6Y8 | DNAK_ECOLI | * | P21513 | POA6Y8 | rne_ecoli  | dnak_ecoli |
| POA6Y8 | DNAK_ECOLI | * | P0A9J0 | POA6Y8 | rng_ecoli  | dnak_ecoli |
| POA6Y8 | DNAK_ECOLI | * | P0A7Y8 | POA6Y8 | rnpa_ecoli | dnak_ecoli |
| POA6Y8 | DNAK_ECOLI | * | P0CG19 | POA6Y8 | rnph_ecoli | dnak_ecoli |
| POA6Y8 | DNAK_ECOLI | * | P0AGB3 | POA6Y8 | rp32_ecoli | dnak_ecoli |
| POA6Y8 | DNAK_ECOLI | * | P0AGB3 | POA6Y8 | rp32_ecoli | dnak_ecoli |
| POA6Y8 | DNAK_ECOLI | * | P0AGB3 | POA6Y8 | rp32_ecoli | dnak_ecoli |
| POA6Y8 | DNAK_ECOLI | * | P24255 | POA6Y8 | rp54_ecoli | dnak_ecoli |
| POA6Y8 | DNAK_ECOLI | * | P24255 | POA6Y8 | rp54_ecoli | dnak_ecoli |
| POA6Y8 | DNAK_ECOLI | * | P0AG07 | POA6Y8 | rpe_ecoli  | dnak_ecoli |
| POA6Y8 | DNAK_ECOLI | * | P0A8T7 | POA6Y8 | rpoc_ecoli | dnak_ecoli |
| POA6Y8 | DNAK_ECOLI | * | P0A800 | POA6Y8 | rpoz_ecoli | dnak_ecoli |
| POA6Y8 | DNAK_ECOLI | * | P0A800 | POA6Y8 | rpoz_ecoli | dnak_ecoli |
| POA6Y8 | DNAK_ECOLI | * | P0A7T3 | POA6Y8 | rs16_ecoli | dnak_ecoli |
| POA6Y8 | DNAK_ECOLI | * | P02358 | POA6Y8 | rs6_ecoli  | dnak_ecoli |
| POA6Y8 | DNAK_ECOLI | * | P39286 | POA6Y8 | rsga_ecoli | dnak_ecoli |
| POA6Y8 | DNAK_ECOLI | * | P0ADX9 | POA6Y8 | rsmd_ecoli | dnak_ecoli |
| POA6Y8 | DNAK_ECOLI | * | P38035 | POA6Y8 | rtrc_ecoli | dnak_ecoli |
| POA6Y8 | DNAK_ECOLI | * | P75898 | POA6Y8 | ruta_ecoli | dnak_ecoli |
| POA6Y8 | DNAK_ECOLI | * | P0AFQ5 | POA6Y8 | rutc_ecoli | dnak_ecoli |
| POA6Y8 | DNAK_ECOLI | * | P0A812 | POA6Y8 | ruvb_ecoli | dnak_ecoli |
| POA6Y8 | DNAK_ECOLI | * | P0A812 | POA6Y8 | ruvb_ecoli | dnak_ecoli |
| POA6Y8 | DNAK_ECOLI | * | P0A812 | POA6Y8 | ruvb_ecoli | dnak_ecoli |
| POA6Y8 | DNAK_ECOLI | * | P07026 | POA6Y8 | sdia_ecoli | dnak_ecoli |
| POA6Y8 | DNAK_ECOLI | * | P10408 | POA6Y8 | seca_ecoli | dnak_ecoli |
| POA6Y8 | DNAK_ECOLI | * | P23721 | POA6Y8 | serc_ecoli | dnak_ecoli |
| POA6Y8 | DNAK_ECOLI | * | P37680 | POA6Y8 | sgbe_ecoli | dnak_ecoli |
| POA6Y8 | DNAK_ECOLI | * | P0A7F6 | POA6Y8 | sped_ecoli | dnak_ecoli |
| POA6Y8 | DNAK_ECOLI | * | P15082 | POA6Y8 | srlr_ecoli | dnak_ecoli |
| POA6Y8 | DNAK_ECOLI | * | P28043 | POA6Y8 | ssb2_ecolx | dnak_ecoli |
| POA6Y8 | DNAK_ECOLI | * | P0ACA3 | POA6Y8 | sspa_ecoli | dnak_ecoli |
| POA6Y8 | DNAK_ECOLI | * | P0AFZ3 | POA6Y8 | sspb_ecoli | dnak_ecoli |
| POA6Y8 | DNAK_ECOLI | * | P0AAI1 | POA6Y8 | ssub_ecoli | dnak_ecoli |
| POA6Y8 | DNAK_ECOLI | * | P0AG78 | POA6Y8 | subi_ecoli | dnak_ecoli |
| POA6Y8 | DNAK_ECOLI | * | P0ABZ6 | POA6Y8 | sura_ecoli | dnak_ecoli |
| POA6Y8 | DNAK_ECOLI | * | P00957 | POA6Y8 | sya_ecoli  | dnak_ecoli |
| POA6Y8 | DNAK_ECOLI | * | P0A8M3 | POA6Y8 | syt_ecoli  | dnak_ecoli |
| POA6Y8 | DNAK_ECOLI | * | P0AGJ9 | POA6Y8 | syy_ecoli  | dnak_ecoli |
| POA6Y8 | DNAK_ECOLI | * | P0AGJ9 | POA6Y8 | syy_ecoli  | dnak_ecoli |

|        |            |          |        |                             |                            |
|--------|------------|----------|--------|-----------------------------|----------------------------|
| POA6Y8 | DNAK_ECOLI | * P0AGG2 | POA6Y8 | <a href="#">tesb_ecoli</a>  | <a href="#">dnak_ecoli</a> |
| POA6Y8 | DNAK_ECOLI | * P07464 | POA6Y8 | <a href="#">thga_ecoli</a>  | <a href="#">dnak_ecoli</a> |
| POA6Y8 | DNAK_ECOLI | * P31550 | POA6Y8 | <a href="#">thib_ecoli</a>  | <a href="#">dnak_ecoli</a> |
| POA6Y8 | DNAK_ECOLI | * P30139 | POA6Y8 | <a href="#">thig_ecoli</a>  | <a href="#">dnak_ecoli</a> |
| POA6Y8 | DNAK_ECOLI | * P0AGG4 | POA6Y8 | <a href="#">thio2_ecoli</a> | <a href="#">dnak_ecoli</a> |
| POA6Y8 | DNAK_ECOLI | * P0A853 | POA6Y8 | <a href="#">tnaa_ecoli</a>  | <a href="#">dnak_ecoli</a> |
| POA6Y8 | DNAK_ECOLI | * P0A858 | POA6Y8 | <a href="#">tpis_ecoli</a>  | <a href="#">dnak_ecoli</a> |
| POA6Y8 | DNAK_ECOLI | * P62601 | POA6Y8 | <a href="#">tref_ecoli</a>  | <a href="#">dnak_ecoli</a> |
| POA6Y8 | DNAK_ECOLI | * P36673 | POA6Y8 | <a href="#">trer_ecoli</a>  | <a href="#">dnak_ecoli</a> |
| POA6Y8 | DNAK_ECOLI | * P0A8I5 | POA6Y8 | <a href="#">trmb_ecoli</a>  | <a href="#">dnak_ecoli</a> |
| POA6Y8 | DNAK_ECOLI | * P00895 | POA6Y8 | <a href="#">trpe_ecoli</a>  | <a href="#">dnak_ecoli</a> |
| POA6Y8 | DNAK_ECOLI | * P0A6A0 | POA6Y8 | <a href="#">ubib_ecoli</a>  | <a href="#">dnak_ecoli</a> |
| POA6Y8 | DNAK_ECOLI | * P17993 | POA6Y8 | <a href="#">ubig_ecoli</a>  | <a href="#">dnak_ecoli</a> |
| POA6Y8 | DNAK_ECOLI | * P0AG80 | POA6Y8 | <a href="#">ugpb_ecoli</a>  | <a href="#">dnak_ecoli</a> |
| POA6Y8 | DNAK_ECOLI | * P69822 | POA6Y8 | <a href="#">ulab_ecoli</a>  | <a href="#">dnak_ecoli</a> |
| POA6Y8 | DNAK_ECOLI | * P0A9W0 | POA6Y8 | <a href="#">ular_ecoli</a>  | <a href="#">dnak_ecoli</a> |
| POA6Y8 | DNAK_ECOLI | * P07024 | POA6Y8 | <a href="#">usha_ecoli</a>  | <a href="#">dnak_ecoli</a> |
| POA6Y8 | DNAK_ECOLI | * P37903 | POA6Y8 | <a href="#">uspf_ecoli</a>  | <a href="#">dnak_ecoli</a> |
| POA6Y8 | DNAK_ECOLI | * P39177 | POA6Y8 | <a href="#">uspg_ecoli</a>  | <a href="#">dnak_ecoli</a> |
| POA6Y8 | DNAK_ECOLI | * P39177 | POA6Y8 | <a href="#">uspg_ecoli</a>  | <a href="#">dnak_ecoli</a> |
| POA6Y8 | DNAK_ECOLI | * P0A698 | POA6Y8 | <a href="#">uvra_ecoli</a>  | <a href="#">dnak_ecoli</a> |
| POA6Y8 | DNAK_ECOLI | * P0A8G3 | POA6Y8 | <a href="#">uxac_ecoli</a>  | <a href="#">dnak_ecoli</a> |
| POA6Y8 | DNAK_ECOLI | * P09184 | POA6Y8 | <a href="#">vsr_ecoli</a>   | <a href="#">dnak_ecoli</a> |
| POA6Y8 | DNAK_ECOLI | * P75970 | POA6Y8 | <a href="#">vxis_ecoli</a>  | <a href="#">dnak_ecoli</a> |
| POA6Y8 | DNAK_ECOLI | * P37750 | POA6Y8 | <a href="#">wbbj_ecoli</a>  | <a href="#">dnak_ecoli</a> |
| POA6Y8 | DNAK_ECOLI | * P71244 | POA6Y8 | <a href="#">wcam_ecoli</a>  | <a href="#">dnak_ecoli</a> |
| POA6Y8 | DNAK_ECOLI | * P27836 | POA6Y8 | <a href="#">wecg_ecoli</a>  | <a href="#">dnak_ecoli</a> |
| POA6Y8 | DNAK_ECOLI | * P38506 | POA6Y8 | <a href="#">xni_ecoli</a>   | <a href="#">dnak_ecoli</a> |
| POA6Y8 | DNAK_ECOLI | * P37388 | POA6Y8 | <a href="#">xylg_ecoli</a>  | <a href="#">dnak_ecoli</a> |
| POA6Y8 | DNAK_ECOLI | * Q47719 | POA6Y8 | <a href="#">y4286_ecoli</a> | <a href="#">dnak_ecoli</a> |
| POA6Y8 | DNAK_ECOLI | * P75682 | POA6Y8 | <a href="#">yage_ecoli</a>  | <a href="#">dnak_ecoli</a> |
| POA6Y8 | DNAK_ECOLI | * P77169 | POA6Y8 | <a href="#">yagj_ecoli</a>  | <a href="#">dnak_ecoli</a> |
| POA6Y8 | DNAK_ECOLI | * P77657 | POA6Y8 | <a href="#">yagk_ecoli</a>  | <a href="#">dnak_ecoli</a> |
| POA6Y8 | DNAK_ECOLI | * P77607 | POA6Y8 | <a href="#">yagl_ecoli</a>  | <a href="#">dnak_ecoli</a> |
| POA6Y8 | DNAK_ECOLI | * P75684 | POA6Y8 | <a href="#">yagp_ecoli</a>  | <a href="#">dnak_ecoli</a> |
| POA6Y8 | DNAK_ECOLI | * P77183 | POA6Y8 | <a href="#">yagq_ecoli</a>  | <a href="#">dnak_ecoli</a> |
| POA6Y8 | DNAK_ECOLI | * P77489 | POA6Y8 | <a href="#">yagr_ecoli</a>  | <a href="#">dnak_ecoli</a> |
| POA6Y8 | DNAK_ECOLI | * P77324 | POA6Y8 | <a href="#">yags_ecoli</a>  | <a href="#">dnak_ecoli</a> |
| POA6Y8 | DNAK_ECOLI | * P77297 | POA6Y8 | <a href="#">yahe_ecoli</a>  | <a href="#">dnak_ecoli</a> |
| POA6Y8 | DNAK_ECOLI | * P77187 | POA6Y8 | <a href="#">yahf_ecoli</a>  | <a href="#">dnak_ecoli</a> |
| POA6Y8 | DNAK_ECOLI | * P77554 | POA6Y8 | <a href="#">yahj_ecoli</a>  | <a href="#">dnak_ecoli</a> |
| POA6Y8 | DNAK_ECOLI | * P0AAQ2 | POA6Y8 | <a href="#">yajd_ecoli</a>  | <a href="#">dnak_ecoli</a> |
| POA6Y8 | DNAK_ECOLI | * P46890 | POA6Y8 | <a href="#">ybae_ecoli</a>  | <a href="#">dnak_ecoli</a> |
| POA6Y8 | DNAK_ECOLI | * P0AAR3 | POA6Y8 | <a href="#">ybak_ecoli</a>  | <a href="#">dnak_ecoli</a> |
| POA6Y8 | DNAK_ECOLI | * P77301 | POA6Y8 | <a href="#">ybap_ecoli</a>  | <a href="#">dnak_ecoli</a> |

|        |            |          |        |            |            |
|--------|------------|----------|--------|------------|------------|
| POA6Y8 | DNAK_ECOLI | * P0AFP2 | POA6Y8 | ybaz_ecoli | dnak_ecoli |
| POA6Y8 | DNAK_ECOLI | * P0A9T8 | POA6Y8 | ybba_ecoli | dnak_ecoli |
| POA6Y8 | DNAK_ECOLI | * P0AAS9 | POA6Y8 | ybdd_ecoli | dnak_ecoli |
| POA6Y8 | DNAK_ECOLI | * P45579 | POA6Y8 | ybdh_ecoli | dnak_ecoli |
| POA6Y8 | DNAK_ECOLI | * P77316 | POA6Y8 | ybdr_ecoli | dnak_ecoli |
| POA6Y8 | DNAK_ECOLI | * P75746 | POA6Y8 | ybgl_ecoli | dnak_ecoli |
| POA6Y8 | DNAK_ECOLI | * P75749 | POA6Y8 | ybgp_ecoli | dnak_ecoli |
| POA6Y8 | DNAK_ECOLI | * P12994 | POA6Y8 | ybhb_ecoli | dnak_ecoli |
| POA6Y8 | DNAK_ECOLI | * P30176 | POA6Y8 | ybia_ecoli | dnak_ecoli |
| POA6Y8 | DNAK_ECOLI | * P0ACU0 | POA6Y8 | ybih_ecoli | dnak_ecoli |
| POA6Y8 | DNAK_ECOLI | * P0AAX8 | POA6Y8 | ybis_ecoli | dnak_ecoli |
| POA6Y8 | DNAK_ECOLI | * P31545 | POA6Y8 | ycdb_ecoli | dnak_ecoli |
| POA6Y8 | DNAK_ECOLI | * P0AB24 | POA6Y8 | ycdo_ecoli | dnak_ecoli |
| POA6Y8 | DNAK_ECOLI | * P24188 | POA6Y8 | ycea_ecoli | dnak_ecoli |
| POA6Y8 | DNAK_ECOLI | * P24188 | POA6Y8 | ycea_ecoli | dnak_ecoli |
| POA6Y8 | DNAK_ECOLI | * P76002 | POA6Y8 | ycgk_ecoli | dnak_ecoli |
| POA6Y8 | DNAK_ECOLI | * P0AB43 | POA6Y8 | ycgl_ecoli | dnak_ecoli |
| POA6Y8 | DNAK_ECOLI | * P76010 | POA6Y8 | ycgr_ecoli | dnak_ecoli |
| POA6Y8 | DNAK_ECOLI | * P75991 | POA6Y8 | ycgz_ecoli | dnak_ecoli |
| POA6Y8 | DNAK_ECOLI | * P30192 | POA6Y8 | ychg_ecoli | dnak_ecoli |
| POA6Y8 | DNAK_ECOLI | * P08245 | POA6Y8 | ycih_ecoli | dnak_ecoli |
| POA6Y8 | DNAK_ECOLI | * P76069 | POA6Y8 | yday_ecoli | dnak_ecoli |
| POA6Y8 | DNAK_ECOLI | * P33666 | POA6Y8 | ydba_ecoli | dnak_ecoli |
| POA6Y8 | DNAK_ECOLI | * P76100 | POA6Y8 | ydck_ecoli | dnak_ecoli |
| POA6Y8 | DNAK_ECOLI | * P77286 | POA6Y8 | ydeu_ecoli | dnak_ecoli |
| POA6Y8 | DNAK_ECOLI | * P76165 | POA6Y8 | ydfx_ecoli | dnak_ecoli |
| POA6Y8 | DNAK_ECOLI | * P77552 | POA6Y8 | ydhq_ecoli | dnak_ecoli |
| POA6Y8 | DNAK_ECOLI | * P0ACX3 | POA6Y8 | ydhr_ecoli | dnak_ecoli |
| POA6Y8 | DNAK_ECOLI | * P0ACX3 | POA6Y8 | ydhr_ecoli | dnak_ecoli |
| POA6Y8 | DNAK_ECOLI | * P64479 | POA6Y8 | ydiz_ecoli | dnak_ecoli |
| POA6Y8 | DNAK_ECOLI | * P0ACY1 | POA6Y8 | yджа_ecoli | dnak_ecoli |
| POA6Y8 | DNAK_ECOLI | * P77721 | POA6Y8 | ydjf_ecoli | dnak_ecoli |
| POA6Y8 | DNAK_ECOLI | * P77280 | POA6Y8 | ydjj_ecoli | dnak_ecoli |
| POA6Y8 | DNAK_ECOLI | * P76270 | POA6Y8 | yebr_ecoli | dnak_ecoli |
| POA6Y8 | DNAK_ECOLI | * P0AA31 | POA6Y8 | yedf_ecoli | dnak_ecoli |
| POA6Y8 | DNAK_ECOLI | * P76321 | POA6Y8 | yedn_ecoli | dnak_ecoli |
| POA6Y8 | DNAK_ECOLI | * P76342 | POA6Y8 | yedy_ecoli | dnak_ecoli |
| POA6Y8 | DNAK_ECOLI | * P64524 | POA6Y8 | yeev_ecoli | dnak_ecoli |
| POA6Y8 | DNAK_ECOLI | * P33347 | POA6Y8 | yehk_ecoli | dnak_ecoli |
| POA6Y8 | DNAK_ECOLI | * P33916 | POA6Y8 | yejf_ecoli | dnak_ecoli |
| POA6Y8 | DNAK_ECOLI | * P39199 | POA6Y8 | yfcb_ecoli | dnak_ecoli |
| POA6Y8 | DNAK_ECOLI | * P65556 | POA6Y8 | yfcd_ecoli | dnak_ecoli |
| POA6Y8 | DNAK_ECOLI | * P52119 | POA6Y8 | yfjf_ecoli | dnak_ecoli |
| POA6Y8 | DNAK_ECOLI | * P52126 | POA6Y8 | yfjk_ecoli | dnak_ecoli |
| POA6Y8 | DNAK_ECOLI | * Q46896 | POA6Y8 | ygbt_ecoli | dnak_ecoli |



|        |             |          |        |                             |                             |
|--------|-------------|----------|--------|-----------------------------|-----------------------------|
| POA6Y8 | DNAK_ECOLI  | * Q46906 | POA6Y8 | ygcp_ecoli                  | dnak_ecoli                  |
| POA6Y8 | DNAK_ECOLI  | * Q46906 | POA6Y8 | ygcp_ecoli                  | dnak_ecoli                  |
| POA6Y8 | DNAK_ECOLI  | * Q46796 | POA6Y8 | ygep_ecoli                  | dnak_ecoli                  |
| POA6Y8 | DNAK_ECOLI  | * P0AG84 | POA6Y8 | <a href="#">yggha_ecoli</a> | <a href="#">dnak_ecoli</a>  |
| POA6Y8 | DNAK_ECOLI  | * P64572 | POA6Y8 | yghr_ecoli                  | dnak_ecoli                  |
| POA6Y8 | DNAK_ECOLI  | * P26646 | POA6Y8 | yhdh_ecoli                  | dnak_ecoli                  |
| POA6Y8 | DNAK_ECOLI  | * P36677 | POA6Y8 | yhdn_ecoli                  | dnak_ecoli                  |
| POA6Y8 | DNAK_ECOLI  | * P46853 | POA6Y8 | yhhx_ecoli                  | dnak_ecoli                  |
| POA6Y8 | DNAK_ECOLI  | * P0ADJ3 | POA6Y8 | yhjr_ecoli                  | dnak_ecoli                  |
| POA6Y8 | DNAK_ECOLI  | * P0ADK6 | POA6Y8 | <a href="#">yiba_ecoli</a>  | <a href="#">dnak_ecoli</a>  |
| POA6Y8 | DNAK_ECOLI  | * P23839 | POA6Y8 | yicc_ecoli                  | dnak_ecoli                  |
| POA6Y8 | DNAK_ECOLI  | * P0A8Y5 | POA6Y8 | yida_ecoli                  | dnak_ecoli                  |
| POA6Y8 | DNAK_ECOLI  | * P0A8Y5 | POA6Y8 | yida_ecoli                  | dnak_ecoli                  |
| POA6Y8 | DNAK_ECOLI  | * P31443 | POA6Y8 | yidf_ecoli                  | dnak_ecoli                  |
| POA6Y8 | DNAK_ECOLI  | * P0ADQ2 | POA6Y8 | yiid_ecoli                  | dnak_ecoli                  |
| POA6Y8 | DNAK_ECOLI  | * P32704 | POA6Y8 | yjcf_ecoli                  | dnak_ecoli                  |
| POA6Y8 | DNAK_ECOLI  | * P16694 | POA6Y8 | yjda_ecoli                  | dnak_ecoli                  |
| POA6Y8 | DNAK_ECOLI  | * P0AF67 | POA6Y8 | <a href="#">yjee_ecoli</a>  | <a href="#">dnak_ecoli</a>  |
| POA6Y8 | DNAK_ECOLI  | * P37342 | POA6Y8 | <a href="#">yjji_ecoli</a>  | <a href="#">dnak_ecoli</a>  |
| POA6Y8 | DNAK_ECOLI  | * P76068 | POA6Y8 | ynak_ecoli                  | dnak_ecoli                  |
| POA6Y8 | DNAK_ECOLI  | * P77475 | POA6Y8 | yqab_ecoli                  | dnak_ecoli                  |
| POA6Y8 | DNAK_ECOLI  | * P45465 | POA6Y8 | yran_ecoli                  | dnak_ecoli                  |
| P76129 | DOSP_ECOLI  | none     |        |                             |                             |
| POA988 | DPO3B_ECOLI | * P24182 | POA988 | <a href="#">accs_ecoli</a>  | <a href="#">dpo3b_ecoli</a> |
| POA988 | DPO3B_ECOLI | * P0A9X9 | POA988 | cspa_ecoli                  | dpo3b_ecoli                 |
| POA988 | DPO3B_ECOLI | * P36995 | POA988 | cspb_ecoli                  | dpo3b_ecoli                 |
| POA988 | DPO3B_ECOLI | * P0A972 | POA988 | cspe_ecoli                  | dpo3b_ecoli                 |
| POA988 | DPO3B_ECOLI | * P0AEK4 | POA988 | <a href="#">fabj_ecoli</a>  | <a href="#">dpo3b_ecoli</a> |
| POA988 | DPO3B_ECOLI | * P61949 | POA988 | <a href="#">flav_ecoli</a>  | <a href="#">dpo3b_ecoli</a> |
| POA988 | DPO3B_ECOLI | * P32662 | POA988 | gph_ecoli                   | dpo3b_ecoli                 |
| POA988 | DPO3B_ECOLI | * P69931 | POA988 | hda_ecoli                   | dpo3b_ecoli                 |
| POA988 | DPO3B_ECOLI | * P0ACE7 | POA988 | <a href="#">hint_ecoli</a>  | <a href="#">dpo3b_ecoli</a> |
| POA988 | DPO3B_ECOLI | * P28630 | POA988 | hola_ecoli                  | dpo3b_ecoli                 |
| POA988 | DPO3B_ECOLI | * P28630 | POA988 | hola_ecoli                  | dpo3b_ecoli                 |
| POA988 | DPO3B_ECOLI | * P0A7A9 | POA988 | <a href="#">ipyr_ecoli</a>  | <a href="#">dpo3b_ecoli</a> |
| POA988 | DPO3B_ECOLI | * P0A9H3 | POA988 | ldci_ecoli                  | dpo3b_ecoli                 |
| POA988 | DPO3B_ECOLI | * P0A763 | POA988 | ndk_ecoli                   | dpo3b_ecoli                 |
| POA988 | DPO3B_ECOLI | * P07004 | POA988 | proa_ecoli                  | dpo3b_ecoli                 |
| POA988 | DPO3B_ECOLI | * P0AG07 | POA988 | rpe_ecoli                   | dpo3b_ecoli                 |
| POA988 | DPO3B_ECOLI | * P0AG07 | POA988 | rpe_ecoli                   | dpo3b_ecoli                 |
| POA988 | DPO3B_ECOLI | * P16659 | POA988 | <a href="#">syp_ecoli</a>   | <a href="#">dpo3b_ecoli</a> |
| POA988 | DPO3B_ECOLI | * P0A8E7 | POA988 | <a href="#">yajq_ecoli</a>  | <a href="#">dpo3b_ecoli</a> |
| POA988 | DPO3B_ECOLI | * P77395 | POA988 | ybbn_ecoli                  | dpo3b_ecoli                 |



|        |             |   |        |        |             |             |
|--------|-------------|---|--------|--------|-------------|-------------|
| P0A988 | DPO3B_ECOLI | * | P0ACX3 | P0A988 | ydhr_ecoli  | dpo3b_ecoli |
| P0A988 | DPO3B_ECOLI | * | P0ACY3 | P0A988 | yeag_ecoli  | dpo3b_ecoli |
| P0A988 | DPO3B_ECOLI | * | P0AG84 | P0A988 | ygha_ecoli  | dpo3b_ecoli |
| P0ABT2 | DPS_ECOLI   | * | P0ABW9 | P0ABT2 | flgb_ecoli  | dps_ecoli   |
| P0ABT2 | DPS_ECOLI   | * | P0AAB6 | P0ABT2 | galf_ecoli  | dps_ecoli   |
| P0ABT2 | DPS_ECOLI   | * | P0AAC8 | P0ABT2 | isca_ecoli  | dps_ecoli   |
| P0ABT2 | DPS_ECOLI   | * | P0A734 | P0ABT2 | mine_ecoli  | dps_ecoli   |
| P0ABT2 | DPS_ECOLI   | * | P29745 | P0ABT2 | pept_ecoli  | dps_ecoli   |
| P0ABT2 | DPS_ECOLI   | * | P60723 | P0ABT2 | rl4_ecoli   | dps_ecoli   |
| P0ABT2 | DPS_ECOLI   | * | P77444 | P0ABT2 | sufs_ecoli  | dps_ecoli   |
| P0ABT2 | DPS_ECOLI   | * | P0A8N5 | P0ABT2 | syk2_ecoli  | dps_ecoli   |
| P0ABT2 | DPS_ECOLI   | * | P0A8N5 | P0ABT2 | syk2_ecoli  | dps_ecoli   |
| P0ABT2 | DPS_ECOLI   | * | P0AD07 | P0ABT2 | yecf_ecoli  | dps_ecoli   |
| P0ABT2 | DPS_ECOLI   | * | P76483 | P0ABT2 | yfbm_ecoli  | dps_ecoli   |
| P0ABT2 | DPS_ECOLI   | * | P24178 | P0ABT2 | yffb_ecoli  | dps_ecoli   |
| P0ABT2 | DPS_ECOLI   | * | P77538 | P0ABT2 | yfhr_ecoli  | dps_ecoli   |
| P32695 | DUSA_ECOLI  |   | none   |        |             |             |
| P77488 | DXS_ECOLI   |   | none   |        |             |             |
| P0ADB7 | ECNB_ECOLI  |   | none   |        |             |             |
| P23827 | ECOT_ECOLI  | * | P23827 | P23827 | ecot_ecoli  | ecot_ecoli  |
| P23827 | ECOT_ECOLI  | * | P32169 | P23827 | rhad_ecoli  | ecot_ecoli  |
| P23827 | ECOT_ECOLI  | * | P76243 | P23827 | yeao_ecoli  | ecot_ecoli  |
| P23827 | ECOT_ECOLI  | * | P64488 | P23827 | year_ecoli  | ecot_ecoli  |
| P0A6M8 | EFG_ECOLI   | * | P39451 | P0A6M8 | adh_p_ecoli | efg_ecoli   |
| P0A6M8 | EFG_ECOLI   | * | P0ABE7 | P0A6M8 | c562_ecolx  | efg_ecoli   |
| P0A6M8 | EFG_ECOLI   | * | P0A6F9 | P0A6M8 | ch10_ecoli  | efg_ecoli   |
| P0A6M8 | EFG_ECOLI   | * | P77268 | P0A6M8 | ddpd_ecoli  | efg_ecoli   |
| P0A6M8 | EFG_ECOLI   | * | P0A9A6 | P0A6M8 | ftsz_ecoli  | efg_ecoli   |
| P0A6M8 | EFG_ECOLI   | * | P0A6H5 | P0A6M8 | hslu_ecoli  | efg_ecoli   |
| P0A6M8 | EFG_ECOLI   | * | P0ACR9 | P0A6M8 | mpra_ecoli  | efg_ecoli   |
| P0A6M8 | EFG_ECOLI   | * | P0A9X4 | P0A6M8 | mreb_ecoli  | efg_ecoli   |
| P0A6M8 | EFG_ECOLI   | * | P24205 | P0A6M8 | msbb_ecoli  | efg_ecoli   |
| P0A6M8 | EFG_ECOLI   | * | P17802 | P0A6M8 | muty_ecoli  | efg_ecoli   |
| P0A6M8 | EFG_ECOLI   | * | P29745 | P0A6M8 | pept_ecoli  | efg_ecoli   |
| P0A6M8 | EFG_ECOLI   | * | P15640 | P0A6M8 | pur2_ecoli  | efg_ecoli   |
| P0A6M8 | EFG_ECOLI   | * | P37906 | P0A6M8 | puub_ecoli  | efg_ecoli   |
| P0A6M8 | EFG_ECOLI   | * | P0A7E9 | P0A6M8 | pyrh_ecoli  | efg_ecoli   |
| P0A6M8 | EFG_ECOLI   | * | P0AFU8 | P0A6M8 | risa_ecoli  | efg_ecoli   |
| P0A6M8 | EFG_ECOLI   | * | P60723 | P0A6M8 | rl4_ecoli   | efg_ecoli   |

|        |             |          |        |             |             |
|--------|-------------|----------|--------|-------------|-------------|
| POA6M8 | EFG_ECOLI   | * P36979 | POA6M8 | rlmn_ecoli  | efg_ecoli   |
| POA6M8 | EFG_ECOLI   | * P30850 | POA6M8 | rnb_ecoli   | efg_ecoli   |
| POA6M8 | EFG_ECOLI   | * P0AFW8 | POA6M8 | rof_ecoli   | efg_ecoli   |
| POA6M8 | EFG_ECOLI   | * P39286 | POA6M8 | rsga_ecoli  | efg_ecoli   |
| POA6M8 | EFG_ECOLI   | * P0A8N5 | POA6M8 | syk2_ecoli  | efg_ecoli   |
| POA6M8 | EFG_ECOLI   | * P0AA25 | POA6M8 | thio_ecoli  | efg_ecoli   |
| POA6M8 | EFG_ECOLI   | * P0AA25 | POA6M8 | thio_ecoli  | efg_ecoli   |
| POA6M8 | EFG_ECOLI   | * P00934 | POA6M8 | thrc_ecoli  | efg_ecoli   |
| POA6M8 | EFG_ECOLI   | * P00895 | POA6M8 | trpe_ecoli  | efg_ecoli   |
| POA6M8 | EFG_ECOLI   | * P77804 | POA6M8 | ydga_ecoli  | efg_ecoli   |
| POA6M8 | EFG_ECOLI   | * P77552 | POA6M8 | ydhq_ecoli  | efg_ecoli   |
| POA6N4 | EFP_ECOLI   | * P0AA25 | POA6N4 | thio_ecoli  | efp_ecoli   |
| POA6N8 | EFPL_ECOLI  | none     |        |             |             |
| POA6P1 | EFTS_ECOLI  | * P0A6M8 | POA6P1 | efg_ecoli   | efts_ecoli  |
| POA6P1 | EFTS_ECOLI  | * P0A6M8 | POA6P1 | efg_ecoli   | efts_ecoli  |
| POA6P1 | EFTS_ECOLI  | * P0CE47 | POA6P1 | eftu1_ecoli | efts_ecoli  |
| POA6P1 | EFTS_ECOLI  | * P0CE47 | POA6P1 | eftu1_ecoli | efts_ecoli  |
| POA6P1 | EFTS_ECOLI  | * P0CE47 | POA6P1 | eftu1_ecoli | efts_ecoli  |
| POA6P1 | EFTS_ECOLI  | * P0CE47 | POA6P1 | eftu1_ecoli | efts_ecoli  |
| POA6P1 | EFTS_ECOLI  | * P0CE47 | POA6P1 | eftu1_ecoli | efts_ecoli  |
| POA6P1 | EFTS_ECOLI  | * P76773 | POA6P1 | ompl_ecoli  | efts_ecoli  |
| POA6P1 | EFTS_ECOLI  | * P0A7E9 | POA6P1 | pyrh_ecoli  | efts_ecoli  |
| POA6P1 | EFTS_ECOLI  | * P0AA25 | POA6P1 | thio_ecoli  | efts_ecoli  |
| POCE47 | EFTU1_ECOLI | * P61517 | POCE47 | can_ecoli   | eftu1_ecoli |
| POCE47 | EFTU1_ECOLI | * P36659 | POCE47 | cbpa_ecoli  | eftu1_ecoli |
| POCE47 | EFTU1_ECOLI | * P06961 | POCE47 | cca_ecoli   | eftu1_ecoli |
| POCE47 | EFTU1_ECOLI | * P0AE60 | POCE47 | ceda_ecoli  | eftu1_ecoli |
| POCE47 | EFTU1_ECOLI | * P0ABH9 | POCE47 | clpa_ecoli  | eftu1_ecoli |
| POCE47 | EFTU1_ECOLI | * P63284 | POCE47 | clpb_ecoli  | eftu1_ecoli |
| POCE47 | EFTU1_ECOLI | * P0A6G7 | POCE47 | clpp_ecoli  | eftu1_ecoli |
| POCE47 | EFTU1_ECOLI | * P0A6G7 | POCE47 | clpp_ecoli  | eftu1_ecoli |
| POCE47 | EFTU1_ECOLI | * P0A6H1 | POCE47 | clpx_ecoli  | eftu1_ecoli |
| POCE47 | EFTU1_ECOLI | * P69488 | POCE47 | cuta_ecoli  | eftu1_ecoli |
| POCE47 | EFTU1_ECOLI | * P76251 | POCE47 | dmla_ecoli  | eftu1_ecoli |
| POCE47 | EFTU1_ECOLI | * P03004 | POCE47 | dnaa_ecoli  | eftu1_ecoli |
| POCE47 | EFTU1_ECOLI | * P0ACB0 | POCE47 | dnab_ecoli  | eftu1_ecoli |
| POCE47 | EFTU1_ECOLI | * P0ACB0 | POCE47 | dnab_ecoli  | eftu1_ecoli |
| POCE47 | EFTU1_ECOLI | * P08622 | POCE47 | dnaj_ecoli  | eftu1_ecoli |
| POCE47 | EFTU1_ECOLI | * P0A6Y8 | POCE47 | dnak_ecoli  | eftu1_ecoli |
| POCE47 | EFTU1_ECOLI | * P0A6Y8 | POCE47 | dnak_ecoli  | eftu1_ecoli |
| POCE47 | EFTU1_ECOLI | * P77488 | POCE47 | dxs_ecoli   | eftu1_ecoli |
| POCE47 | EFTU1_ECOLI | * P0A6M8 | POCE47 | efg_ecoli   | eftu1_ecoli |

|        |             |          |        |            |             |
|--------|-------------|----------|--------|------------|-------------|
| POCE47 | EFTU1_ECOLI | * P0A6M8 | POCE47 | efg_ecoli  | eftu1_ecoli |
| POCE47 | EFTU1_ECOLI | * P0A6M8 | POCE47 | efg_ecoli  | eftu1_ecoli |
| POCE47 | EFTU1_ECOLI | * P0A6P1 | POCE47 | efts_ecoli | eftu1_ecoli |
| POCE47 | EFTU1_ECOLI | * P0A6P1 | POCE47 | efts_ecoli | eftu1_ecoli |
| POCE47 | EFTU1_ECOLI | * P0A6P1 | POCE47 | efts_ecoli | eftu1_ecoli |
| POCE47 | EFTU1_ECOLI | * P0A6P1 | POCE47 | efts_ecoli | eftu1_ecoli |
| POCE47 | EFTU1_ECOLI | * P06616 | POCE47 | era_ecoli  | eftu1_ecoli |
| POCE47 | EFTU1_ECOLI | * P0A6Q3 | POCE47 | faba_ecoli | eftu1_ecoli |
| POCE47 | EFTU1_ECOLI | * P0A6Q6 | POCE47 | fabz_ecoli | eftu1_ecoli |
| POCE47 | EFTU1_ECOLI | * P24183 | POCE47 | fdng_ecoli | eftu1_ecoli |
| POCE47 | EFTU1_ECOLI | * P24183 | POCE47 | fdng_ecoli | eftu1_ecoli |
| POCE47 | EFTU1_ECOLI | * P0ACP1 | POCE47 | frur_ecoli | eftu1_ecoli |
| POCE47 | EFTU1_ECOLI | * P0ABH0 | POCE47 | ftsa_ecoli | eftu1_ecoli |
| POCE47 | EFTU1_ECOLI | * P0ABH0 | POCE47 | ftsa_ecoli | eftu1_ecoli |
| POCE47 | EFTU1_ECOLI | * P0A9R7 | POCE47 | ftse_ecoli | eftu1_ecoli |
| POCE47 | EFTU1_ECOLI | * P0A9A6 | POCE47 | ftsz_ecoli | eftu1_ecoli |
| POCE47 | EFTU1_ECOLI | * P0C8J6 | POCE47 | gaty_ecoli | eftu1_ecoli |
| POCE47 | EFTU1_ECOLI | * P0C8J6 | POCE47 | gaty_ecoli | eftu1_ecoli |
| POCE47 | EFTU1_ECOLI | * P05852 | POCE47 | gcp_ecoli  | eftu1_ecoli |
| POCE47 | EFTU1_ECOLI | * P31120 | POCE47 | glmm_ecoli | eftu1_ecoli |
| POCE47 | EFTU1_ECOLI | * P0A6W5 | POCE47 | grea_ecoli | eftu1_ecoli |
| POCE47 | EFTU1_ECOLI | * P09372 | POCE47 | grpe_ecoli | eftu1_ecoli |
| POCE47 | EFTU1_ECOLI | * P0AES4 | POCE47 | gyra_ecoli | eftu1_ecoli |
| POCE47 | EFTU1_ECOLI | * P0AES4 | POCE47 | gyra_ecoli | eftu1_ecoli |
| POCE47 | EFTU1_ECOLI | * P0AES6 | POCE47 | gyrb_ecoli | eftu1_ecoli |
| POCE47 | EFTU1_ECOLI | * P0AES6 | POCE47 | gyrb_ecoli | eftu1_ecoli |
| POCE47 | EFTU1_ECOLI | * P15038 | POCE47 | held_ecoli | eftu1_ecoli |
| POCE47 | EFTU1_ECOLI | * P15038 | POCE47 | held_ecoli | eftu1_ecoli |
| POCE47 | EFTU1_ECOLI | * P0A6X3 | POCE47 | hfq_ecoli  | eftu1_ecoli |
| POCE47 | EFTU1_ECOLI | * P0ACE7 | POCE47 | hint_ecoli | eftu1_ecoli |
| POCE47 | EFTU1_ECOLI | * P0ABS8 | POCE47 | hole_ecoli | eftu1_ecoli |
| POCE47 | EFTU1_ECOLI | * P43329 | POCE47 | hrpa_ecoli | eftu1_ecoli |
| POCE47 | EFTU1_ECOLI | * P0A6L9 | POCE47 | hscb_ecoli | eftu1_ecoli |
| POCE47 | EFTU1_ECOLI | * P0A6L9 | POCE47 | hscb_ecoli | eftu1_ecoli |
| POCE47 | EFTU1_ECOLI | * P0A6Y5 | POCE47 | hslo_ecoli | eftu1_ecoli |
| POCE47 | EFTU1_ECOLI | * P0A6Y5 | POCE47 | hslo_ecoli | eftu1_ecoli |
| POCE47 | EFTU1_ECOLI | * P0A6H5 | POCE47 | hslu_ecoli | eftu1_ecoli |
| POCE47 | EFTU1_ECOLI | * P0A6H5 | POCE47 | hslu_ecoli | eftu1_ecoli |
| POCE47 | EFTU1_ECOLI | * P0A7B8 | POCE47 | hslv_ecoli | eftu1_ecoli |
| POCE47 | EFTU1_ECOLI | * P24192 | POCE47 | hypd_ecoli | eftu1_ecoli |
| POCE47 | EFTU1_ECOLI | * P24192 | POCE47 | hypd_ecoli | eftu1_ecoli |
| POCE47 | EFTU1_ECOLI | * P0C054 | POCE47 | ibpa_ecoli | eftu1_ecoli |
| POCE47 | EFTU1_ECOLI | * P0C054 | POCE47 | ibpa_ecoli | eftu1_ecoli |
| POCE47 | EFTU1_ECOLI | * P0C058 | POCE47 | ibpb_ecoli | eftu1_ecoli |
| POCE47 | EFTU1_ECOLI | * P0A8S1 | POCE47 | icia_ecoli | eftu1_ecoli |

|        |             |          |        |                             |                             |
|--------|-------------|----------|--------|-----------------------------|-----------------------------|
| POCE47 | EFTU1_ECOLI | * P0A7A9 | POCE47 | <a href="#">ipyr_ecoli</a>  | <a href="#">eftu1_ecoli</a> |
| POCE47 | EFTU1_ECOLI | * P0A715 | POCE47 | <a href="#">kdsa_ecoli</a>  | <a href="#">eftu1_ecoli</a> |
| POCE47 | EFTU1_ECOLI | * P0A715 | POCE47 | <a href="#">kdsa_ecoli</a>  | <a href="#">eftu1_ecoli</a> |
| POCE47 | EFTU1_ECOLI | * P04951 | POCE47 | <a href="#">kdsb_ecoli</a>  | <a href="#">eftu1_ecoli</a> |
| POCE47 | EFTU1_ECOLI | * P0A720 | POCE47 | <a href="#">kthy_ecoli</a>  | <a href="#">eftu1_ecoli</a> |
| POCE47 | EFTU1_ECOLI | * P0A9H3 | POCE47 | <a href="#">ldci_ecoli</a>  | <a href="#">eftu1_ecoli</a> |
| POCE47 | EFTU1_ECOLI | * P0A9M0 | POCE47 | <a href="#">lon_ecoli</a>   | <a href="#">eftu1_ecoli</a> |
| POCE47 | EFTU1_ECOLI | * P10441 | POCE47 | <a href="#">lpxb_ecoli</a>  | <a href="#">eftu1_ecoli</a> |
| POCE47 | EFTU1_ECOLI | * P10441 | POCE47 | <a href="#">lpxb_ecoli</a>  | <a href="#">eftu1_ecoli</a> |
| POCE47 | EFTU1_ECOLI | * P06993 | POCE47 | <a href="#">malt_ecoli</a>  | <a href="#">eftu1_ecoli</a> |
| POCE47 | EFTU1_ECOLI | * P0ACE0 | POCE47 | <a href="#">mbhm_ecoli</a>  | <a href="#">eftu1_ecoli</a> |
| POCE47 | EFTU1_ECOLI | * P0ACE0 | POCE47 | <a href="#">mbhm_ecoli</a>  | <a href="#">eftu1_ecoli</a> |
| POCE47 | EFTU1_ECOLI | * P0A817 | POCE47 | <a href="#">metk_ecoli</a>  | <a href="#">eftu1_ecoli</a> |
| POCE47 | EFTU1_ECOLI | * P0A817 | POCE47 | <a href="#">metk_ecoli</a>  | <a href="#">eftu1_ecoli</a> |
| POCE47 | EFTU1_ECOLI | * P30750 | POCE47 | <a href="#">metn_ecoli</a>  | <a href="#">eftu1_ecoli</a> |
| POCE47 | EFTU1_ECOLI | * P0AEI1 | POCE47 | <a href="#">miab_ecoli</a>  | <a href="#">eftu1_ecoli</a> |
| POCE47 | EFTU1_ECOLI | * P0AEI1 | POCE47 | <a href="#">miab_ecoli</a>  | <a href="#">eftu1_ecoli</a> |
| POCE47 | EFTU1_ECOLI | * P63386 | POCE47 | <a href="#">mlaf_ecoli</a>  | <a href="#">eftu1_ecoli</a> |
| POCE47 | EFTU1_ECOLI | * P63386 | POCE47 | <a href="#">mlaf_ecoli</a>  | <a href="#">eftu1_ecoli</a> |
| POCE47 | EFTU1_ECOLI | * P30745 | POCE47 | <a href="#">moaa_ecoli</a>  | <a href="#">eftu1_ecoli</a> |
| POCE47 | EFTU1_ECOLI | * P0A9X4 | POCE47 | <a href="#">mreb_ecoli</a>  | <a href="#">eftu1_ecoli</a> |
| POCE47 | EFTU1_ECOLI | * P0A9X4 | POCE47 | <a href="#">mreb_ecoli</a>  | <a href="#">eftu1_ecoli</a> |
| POCE47 | EFTU1_ECOLI | * P22523 | POCE47 | <a href="#">mukb_ecoli</a>  | <a href="#">eftu1_ecoli</a> |
| POCE47 | EFTU1_ECOLI | * P22523 | POCE47 | <a href="#">mukb_ecoli</a>  | <a href="#">eftu1_ecoli</a> |
| POCE47 | EFTU1_ECOLI | * P0A749 | POCE47 | <a href="#">mura_ecoli</a>  | <a href="#">eftu1_ecoli</a> |
| POCE47 | EFTU1_ECOLI | * P17952 | POCE47 | <a href="#">murc_ecoli</a>  | <a href="#">eftu1_ecoli</a> |
| POCE47 | EFTU1_ECOLI | * P17952 | POCE47 | <a href="#">murc_ecoli</a>  | <a href="#">eftu1_ecoli</a> |
| POCE47 | EFTU1_ECOLI | * P22634 | POCE47 | <a href="#">muri_ecoli</a>  | <a href="#">eftu1_ecoli</a> |
| POCE47 | EFTU1_ECOLI | * P23367 | POCE47 | <a href="#">mutl_ecoli</a>  | <a href="#">eftu1_ecoli</a> |
| POCE47 | EFTU1_ECOLI | * P23909 | POCE47 | <a href="#">muts_ecoli</a>  | <a href="#">eftu1_ecoli</a> |
| POCE47 | EFTU1_ECOLI | * P09152 | POCE47 | <a href="#">narg_ecoli</a>  | <a href="#">eftu1_ecoli</a> |
| POCE47 | EFTU1_ECOLI | * P11349 | POCE47 | <a href="#">narh_ecoli</a>  | <a href="#">eftu1_ecoli</a> |
| POCE47 | EFTU1_ECOLI | * P33590 | POCE47 | <a href="#">nika_ecoli</a>  | <a href="#">eftu1_ecoli</a> |
| POCE47 | EFTU1_ECOLI | * P33593 | POCE47 | <a href="#">nikd_ecoli</a>  | <a href="#">eftu1_ecoli</a> |
| POCE47 | EFTU1_ECOLI | * P33594 | POCE47 | <a href="#">nike_ecoli</a>  | <a href="#">eftu1_ecoli</a> |
| POCE47 | EFTU1_ECOLI | * P0A6Z6 | POCE47 | <a href="#">nikr_ecoli</a>  | <a href="#">eftu1_ecoli</a> |
| POCE47 | EFTU1_ECOLI | * P0AFF6 | POCE47 | <a href="#">nusa_ecoli</a>  | <a href="#">eftu1_ecoli</a> |
| POCE47 | EFTU1_ECOLI | * P29745 | POCE47 | <a href="#">pept_ecoli</a>  | <a href="#">eftu1_ecoli</a> |
| POCE47 | EFTU1_ECOLI | * P0A7A7 | POCE47 | <a href="#">pls_b_ecoli</a> | <a href="#">eftu1_ecoli</a> |
| POCE47 | EFTU1_ECOLI | * P18133 | POCE47 | <a href="#">pncb_ecoli</a>  | <a href="#">eftu1_ecoli</a> |
| POCE47 | EFTU1_ECOLI | * P17888 | POCE47 | <a href="#">pria_ecoli</a>  | <a href="#">eftu1_ecoli</a> |
| POCE47 | EFTU1_ECOLI | * P0AAH0 | POCE47 | <a href="#">pstb_ecoli</a>  | <a href="#">eftu1_ecoli</a> |
| POCE47 | EFTU1_ECOLI | * P0A9M8 | POCE47 | <a href="#">pta_ecoli</a>   | <a href="#">eftu1_ecoli</a> |
| POCE47 | EFTU1_ECOLI | * P0A7D1 | POCE47 | <a href="#">pth_ecoli</a>   | <a href="#">eftu1_ecoli</a> |
| POCE47 | EFTU1_ECOLI | * P37188 | POCE47 | <a href="#">ptkb_ecoli</a>  | <a href="#">eftu1_ecoli</a> |

|        |             |          |        |            |             |
|--------|-------------|----------|--------|------------|-------------|
| POCE47 | EFTU1_ECOLI | * P0A7E9 | POCE47 | pyrh_ecoli | eftu1_ecoli |
| POCE47 | EFTU1_ECOLI | * P77756 | POCE47 | quec_ecoli | eftu1_ecoli |
| POCE47 | EFTU1_ECOLI | * P77756 | POCE47 | quec_ecoli | eftu1_ecoli |
| POCE47 | EFTU1_ECOLI | * P31473 | POCE47 | rava_ecoli | eftu1_ecoli |
| POCE47 | EFTU1_ECOLI | * P69407 | POCE47 | rccb_ecoli | eftu1_ecoli |
| POCE47 | EFTU1_ECOLI | * P21893 | POCE47 | recj_ecoli | eftu1_ecoli |
| POCE47 | EFTU1_ECOLI | * P0A8J8 | POCE47 | rhlb_ecoli | eftu1_ecoli |
| POCE47 | EFTU1_ECOLI | * P0AG30 | POCE47 | rho_ecoli  | eftu1_ecoli |
| POCE47 | EFTU1_ECOLI | * P61714 | POCE47 | risb_ecoli | eftu1_ecoli |
| POCE47 | EFTU1_ECOLI | * P0C0R7 | POCE47 | rlme_ecoli | eftu1_ecoli |
| POCE47 | EFTU1_ECOLI | * P36979 | POCE47 | rlmn_ecoli | eftu1_ecoli |
| POCE47 | EFTU1_ECOLI | * P36979 | POCE47 | rlmn_ecoli | eftu1_ecoli |
| POCE47 | EFTU1_ECOLI | * P21513 | POCE47 | rne_ecoli  | eftu1_ecoli |
| POCE47 | EFTU1_ECOLI | * P0CG19 | POCE47 | rnph_ecoli | eftu1_ecoli |
| POCE47 | EFTU1_ECOLI | * P0A8V2 | POCE47 | rpob_ecoli | eftu1_ecoli |
| POCE47 | EFTU1_ECOLI | * P00579 | POCE47 | rpod_ecoli | eftu1_ecoli |
| POCE47 | EFTU1_ECOLI | * P13445 | POCE47 | rpos_ecoli | eftu1_ecoli |
| POCE47 | EFTU1_ECOLI | * P39286 | POCE47 | rsga_ecoli | eftu1_ecoli |
| POCE47 | EFTU1_ECOLI | * P0ADX9 | POCE47 | rsmd_ecoli | eftu1_ecoli |
| POCE47 | EFTU1_ECOLI | * P0A812 | POCE47 | ruvb_ecoli | eftu1_ecoli |
| POCE47 | EFTU1_ECOLI | * P10408 | POCE47 | seca_ecoli | eftu1_ecoli |
| POCE47 | EFTU1_ECOLI | * P10408 | POCE47 | seca_ecoli | eftu1_ecoli |
| POCE47 | EFTU1_ECOLI | * P0AG24 | POCE47 | spot_ecoli | eftu1_ecoli |
| POCE47 | EFTU1_ECOLI | * P21507 | POCE47 | srmb_ecoli | eftu1_ecoli |
| POCE47 | EFTU1_ECOLI | * P0AFZ3 | POCE47 | sspb_ecoli | eftu1_ecoli |
| POCE47 | EFTU1_ECOLI | * P00957 | POCE47 | sya_ecoli  | eftu1_ecoli |
| POCE47 | EFTU1_ECOLI | * P00960 | POCE47 | syga_ecoli | eftu1_ecoli |
| POCE47 | EFTU1_ECOLI | * P00956 | POCE47 | syi_ecoli  | eftu1_ecoli |
| POCE47 | EFTU1_ECOLI | * P11868 | POCE47 | tdcd_ecoli | eftu1_ecoli |
| POCE47 | EFTU1_ECOLI | * P0A887 | POCE47 | ubie_ecoli | eftu1_ecoli |
| POCE47 | EFTU1_ECOLI | * P0A9W0 | POCE47 | ular_ecoli | eftu1_ecoli |
| POCE47 | EFTU1_ECOLI | * P0A9W0 | POCE47 | ular_ecoli | eftu1_ecoli |
| POCE47 | EFTU1_ECOLI | * P08390 | POCE47 | usg_ecoli  | eftu1_ecoli |
| POCE47 | EFTU1_ECOLI | * P08390 | POCE47 | usg_ecoli  | eftu1_ecoli |
| POCE47 | EFTU1_ECOLI | * P39177 | POCE47 | uspg_ecoli | eftu1_ecoli |
| POCE47 | EFTU1_ECOLI | * P0AED5 | POCE47 | uvry_ecoli | eftu1_ecoli |
| POCE47 | EFTU1_ECOLI | * P0ADN0 | POCE47 | vial_ecoli | eftu1_ecoli |
| POCE47 | EFTU1_ECOLI | * P0A8J4 | POCE47 | ybed_ecoli | eftu1_ecoli |
| POCE47 | EFTU1_ECOLI | * P75829 | POCE47 | ybjx_ecoli | eftu1_ecoli |
| POCE47 | EFTU1_ECOLI | * P75829 | POCE47 | ybjx_ecoli | eftu1_ecoli |
| POCE47 | EFTU1_ECOLI | * P0AFQ7 | POCE47 | ycfh_ecoli | eftu1_ecoli |
| POCE47 | EFTU1_ECOLI | * P77302 | POCE47 | ydam_ecoli | eftu1_ecoli |
| POCE47 | EFTU1_ECOLI | * P76104 | POCE47 | ydcg_ecoli | eftu1_ecoli |
| POCE47 | EFTU1_ECOLI | * P0A8A4 | POCE47 | ydia_ecoli | eftu1_ecoli |
| POCE47 | EFTU1_ECOLI | * P64476 | POCE47 | ydiu_ecoli | eftu1_ecoli |





|        |             |          |        |             |            |
|--------|-------------|----------|--------|-------------|------------|
| P0A6P9 | ENO_ECOLI   | * P21513 | P0A6P9 | rne_ecoli   | eno_ecoli  |
| P0A6P9 | ENO_ECOLI   | * P21513 | P0A6P9 | rne_ecoli   | eno_ecoli  |
| P0A6P9 | ENO_ECOLI   | * P0A9J0 | P0A6P9 | rng_ecoli   | eno_ecoli  |
| P0A6P9 | ENO_ECOLI   | * P0AG07 | P0A6P9 | rpe_ecoli   | eno_ecoli  |
| P0A6P9 | ENO_ECOLI   | * P0A8N5 | P0A6P9 | syk2_ecoli  | eno_ecoli  |
| P0A6P9 | ENO_ECOLI   | * P0A8N5 | P0A6P9 | syk2_ecoli  | eno_ecoli  |
| P0A6P9 | ENO_ECOLI   | * P0A8M3 | P0A6P9 | syt_ecoli   | eno_ecoli  |
| P0A6P9 | ENO_ECOLI   | * P0AA25 | P0A6P9 | thio_ecoli  | eno_ecoli  |
| P0A6P9 | ENO_ECOLI   | * P0AA25 | P0A6P9 | thio_ecoli  | eno_ecoli  |
| P0A6P9 | ENO_ECOLI   | * P0AAS7 | P0A6P9 | ybcj_ecoli  | eno_ecoli  |
| P0ACT2 | ENVR_ECOLI  | none     |        |             |            |
| P76555 | EUTQ_ECOLI  | * P22939 | P76555 | ispa_ecoli  | eutq_ecoli |
| P76555 | EUTQ_ECOLI  | * P37128 | P76555 | nudk_ecoli  | eutq_ecoli |
| P0A993 | F16PA_ECOLI | none     |        |             |            |
| P0A6Q3 | FABA_ECOLI  | * P0AA25 | P0A6Q3 | thio_ecoli  | faba_ecoli |
| P0A6Q3 | FABA_ECOLI  | * P0AA25 | P0A6Q3 | thio_ecoli  | faba_ecoli |
| P0A6Q3 | FABA_ECOLI  | * P0A850 | P0A6Q3 | tig_ecoli   | faba_ecoli |
| P0A6Q3 | FABA_ECOLI  | * P76464 | P0A6Q3 | yfas_ecoli  | faba_ecoli |
| P0A953 | FABB_ECOLI  | * P0A6A8 | P0A953 | acp_ecoli   | fabb_ecoli |
| P0A953 | FABB_ECOLI  | * P0A6A8 | P0A953 | acp_ecoli   | fabb_ecoli |
| P0A953 | FABB_ECOLI  | * P0A6Y8 | P0A953 | dnak_ecoli  | fabb_ecoli |
| P0AAI9 | FABD_ECOLI  | * P77454 | P0AAI9 | glsa1_ecoli | fabd_ecoli |
| P0AAI5 | FABF_ECOLI  | * P0A6A8 | P0AAI5 | acp_ecoli   | fabf_ecoli |
| P0AAI5 | FABF_ECOLI  | * P0A6A8 | P0AAI5 | acp_ecoli   | fabf_ecoli |
| P0AAI5 | FABF_ECOLI  | * P0A6A8 | P0AAI5 | acp_ecoli   | fabf_ecoli |
| P0AAI5 | FABF_ECOLI  | * P28631 | P0AAI5 | holb_ecoli  | fabf_ecoli |
| P0AAI5 | FABF_ECOLI  | * P33020 | P0AAI5 | yeii_ecoli  | fabf_ecoli |
| P0AEK2 | FABG_ECOLI  | * P0A6A8 | P0AEK2 | acp_ecoli   | fabg_ecoli |
| P0AEK2 | FABG_ECOLI  | * P0A6A8 | P0AEK2 | acp_ecoli   | fabg_ecoli |
| P0AEK2 | FABG_ECOLI  | * P0AA25 | P0AEK2 | thio_ecoli  | fabg_ecoli |
| P0A6R0 | FABH_ECOLI  | * P0A6A8 | P0A6R0 | acp_ecoli   | fabh_ecoli |
| P0A6R0 | FABH_ECOLI  | * P37095 | P0A6R0 | pepb_ecoli  | fabh_ecoli |
| P0AEK4 | FABI_ECOLI  | * P52076 | P0AEK4 | qseb_ecoli  | fabi_ecoli |
| P0AEK4 | FABI_ECOLI  | * P0AA25 | P0AEK4 | thio_ecoli  | fabi_ecoli |
| P0AEK4 | FABI_ECOLI  | * P21362 | P0AEK4 | ycif_ecoli  | fabi_ecoli |

|        |            |          |        |            |             |
|--------|------------|----------|--------|------------|-------------|
| P0AEK4 | FABI_ECOLI | * P76034 | P0AEK4 | ycit_ecoli | fab_i_ecoli |
| P0ACU5 | FABR_ECOLI | none     |        |            |             |
| P0A6Q6 | FABZ_ECOLI | * P0A6A8 | P0A6Q6 | acp_ecoli  | fabz_ecoli  |
| P0A6Q6 | FABZ_ECOLI | * P36659 | P0A6Q6 | cbpa_ecoli | fabz_ecoli  |
| P0A6Q6 | FABZ_ECOLI | * P0A6P9 | P0A6Q6 | eno_ecoli  | fabz_ecoli  |
| P0A6Q6 | FABZ_ECOLI | * P36930 | P0A6Q6 | gatr_ecoli | fabz_ecoli  |
| P0A6Q6 | FABZ_ECOLI | * P0AEV9 | P0A6Q6 | hyci_ecoli | fabz_ecoli  |
| P0A6Q6 | FABZ_ECOLI | * P0A9K3 | P0A6Q6 | phol_ecoli | fabz_ecoli  |
| P0A6Q6 | FABZ_ECOLI | * P21513 | P0A6Q6 | rne_ecoli  | fabz_ecoli  |
| P0A6Q6 | FABZ_ECOLI | * P0AA25 | P0A6Q6 | thio_ecoli | fabz_ecoli  |
| P0A6Q6 | FABZ_ECOLI | * P0A8A2 | P0A6Q6 | yeen_ecoli | fabz_ecoli  |
| P25401 | FAEE_ECOLX | none     |        |            |             |
| P23774 | FAPR_ECOLX | none     |        |            |             |
| P13024 | FDHE_ECOLI | * P05052 | P13024 | appy_ecoli | fdhe_ecoli  |
| P13024 | FDHE_ECOLI | * P06282 | P13024 | cdh_ecoli  | fdhe_ecoli  |
| P13024 | FDHE_ECOLI | * P24183 | P13024 | fdng_ecoli | fdhe_ecoli  |
| P13024 | FDHE_ECOLI | * P24183 | P13024 | fdng_ecoli | fdhe_ecoli  |
| P13024 | FDHE_ECOLI | * P0A858 | P13024 | tpis_ecoli | fdhe_ecoli  |
| P13024 | FDHE_ECOLI | * P0AB55 | P13024 | ycii_ecoli | fdhe_ecoli  |
| P24183 | FDNG_ECOLI | * P77488 | P24183 | dxs_ecoli  | fdng_ecoli  |
| P24183 | FDNG_ECOLI | * P0AAJ3 | P24183 | fdnh_ecoli | fdng_ecoli  |
| P24183 | FDNG_ECOLI | * P24216 | P24183 | flid_ecoli | fdng_ecoli  |
| P24183 | FDNG_ECOLI | * P54746 | P24183 | mngb_ecoli | fdng_ecoli  |
| P24183 | FDNG_ECOLI | * P77181 | P24183 | paay_ecoli | fdng_ecoli  |
| P24183 | FDNG_ECOLI | * P75864 | P24183 | rlml_ecoli | fdng_ecoli  |
| P24183 | FDNG_ECOLI | * P77300 | P24183 | yagi_ecoli | fdng_ecoli  |
| P24183 | FDNG_ECOLI | * P37052 | P24183 | yehj_ecoli | fdng_ecoli  |
| P24183 | FDNG_ECOLI | * P76121 | P24183 | yddh_ecoli | fdng_ecoli  |
| P24183 | FDNG_ECOLI | * P67080 | P24183 | yggg_ecoli | fdng_ecoli  |
| P32176 | FDOG_ECOLI | * P13024 | P32176 | fdhe_ecoli | fdog_ecoli  |
| P32176 | FDOG_ECOLI | * P30749 | P32176 | moae_ecoli | fdog_ecoli  |
| P32176 | FDOG_ECOLI | * P0C0L2 | P32176 | osmc_ecoli | fdog_ecoli  |
| P32176 | FDOG_ECOLI | * P21165 | P32176 | pepq_ecoli | fdog_ecoli  |
| P32176 | FDOG_ECOLI | * P0AA25 | P32176 | thio_ecoli | fdog_ecoli  |
| P32176 | FDOG_ECOLI | * P12758 | P32176 | udp_ecoli  | fdog_ecoli  |
| P32176 | FDOG_ECOLI | * P76121 | P32176 | yddh_ecoli | fdog_ecoli  |
| P15029 | FECD_ECOLI | none     |        |            |             |

|        |             |          |        |            |            |
|--------|-------------|----------|--------|------------|------------|
| P23877 | FEPG_ECOLI  | none     |        |            |            |
| P0A9R4 | FER_ECOLI   | * P0AAC8 | P0A9R4 | isca_ecoli | fer_ecoli  |
| P0A9R4 | FER_ECOLI   | * P0AAC8 | P0A9R4 | isca_ecoli | fer_ecoli  |
| Q47153 | FHIA_ECOLI  | * P04949 | Q47153 | flic_ecoli | fhia_ecoli |
| Q47153 | FHIA_ECOLI  | * P60240 | Q47153 | rapa_ecoli | fhia_ecoli |
| P04128 | FIMA1_ECOLI | none     |        |            |            |
| P31697 | FIMC_ECOLI  | * P0AEF4 | P31697 | dpia_ecoli | fimc_ecoli |
| P31697 | FIMC_ECOLI  | * P0A9H1 | P31697 | mug_ecoli  | fimc_ecoli |
| P31697 | FIMC_ECOLI  | * P76422 | P31697 | thid_ecoli | fimc_ecoli |
| P08189 | FIMF_ECOLI  | * P31697 | P08189 | fimc_ecoli | fimf_ecoli |
| P08189 | FIMF_ECOLI  | * P31697 | P08189 | fimc_ecoli | fimf_ecoli |
| P08189 | FIMF_ECOLI  | * P31697 | P08189 | fimc_ecoli | fimf_ecoli |
| P08190 | FIMG_ECOLI  | * P31697 | P08190 | fimc_ecoli | fimg_ecoli |
| P08190 | FIMG_ECOLI  | * P31697 | P08190 | fimc_ecoli | fimg_ecoli |
| P08190 | FIMG_ECOLI  | * P31697 | P08190 | fimc_ecoli | fimg_ecoli |
| P08191 | FIMH_ECOLI  | * P31697 | P08191 | fimc_ecoli | fimh_ecoli |
| P08191 | FIMH_ECOLI  | * P31697 | P08191 | fimc_ecoli | fimh_ecoli |
| P08191 | FIMH_ECOLI  | * P31697 | P08191 | fimc_ecoli | fimh_ecoli |
| P08191 | FIMH_ECOLI  | * P31697 | P08191 | fimc_ecoli | fimh_ecoli |
| P08191 | FIMH_ECOLI  | * P31697 | P08191 | fimc_ecoli | fimh_ecoli |
| P08191 | FIMH_ECOLI  | * P31697 | P08191 | fimc_ecoli | fimh_ecoli |
| P0A6R3 | FIS_ECOLI   | * P0ACF4 | P0A6R3 | dbhb_ecoli | fis_ecoli  |
| P0A6R3 | FIS_ECOLI   | * P00582 | P0A6R3 | dpo1_ecoli | fis_ecoli  |
| P0A6R3 | FIS_ECOLI   | * P03018 | P0A6R3 | uvrd_ecoli | fis_ecoli  |
| P0A6R3 | FIS_ECOLI   | * P64599 | P0A6R3 | yhbt_ecoli | fis_ecoli  |
| P45523 | FKBA_ECOLI  | * P24230 | P45523 | recg_ecoli | fkba_ecoli |
| P45523 | FKBA_ECOLI  | * P0A8V0 | P45523 | rnz_ecoli  | fkba_ecoli |
| P45523 | FKBA_ECOLI  | * Q46897 | P45523 | ygch_ecoli | fkba_ecoli |
| P0A9L3 | FKBB_ECOLI  | * P0AA25 | P0A9L3 | thio_ecoli | fkbb_ecoli |
| P61949 | FLAV_ECOLI  | * P0AB71 | P61949 | alf_ecoli  | flav_ecoli |
| P75933 | FLGA_ECOLI  | * P0A6G7 | P75933 | clpp_ecoli | flga_ecoli |
| P75933 | FLGA_ECOLI  | * P06612 | P75933 | top1_ecoli | flga_ecoli |

|        |            |          |        |            |            |
|--------|------------|----------|--------|------------|------------|
| P04949 | FLIC_ECOLI | * P0A8G9 | P04949 | ex7s_ecoli | flic_ecoli |
| P04949 | FLIC_ECOLI | * P0AEM0 | P04949 | fbxb_ecoli | flic_ecoli |
| P04949 | FLIC_ECOLI | * P0A9K9 | P04949 | slyd_ecoli | flic_ecoli |
| P04949 | FLIC_ECOLI | * Q47269 | P04949 | ybcn_ecoli | flic_ecoli |
| P04949 | FLIC_ECOLI | * P11663 | P04949 | yggd_ecoli | flic_ecoli |
| P15070 | FLIN_ECOLI | * P07364 | P15070 | cher_ecoli | flin_ecoli |
| P15070 | FLIN_ECOLI | * P52612 | P15070 | flii_ecoli | flin_ecoli |
| P15070 | FLIN_ECOLI | * P06974 | P15070 | flim_ecoli | flin_ecoli |
| P15070 | FLIN_ECOLI | * P15070 | P15070 | flin_ecoli | flin_ecoli |
| P15070 | FLIN_ECOLI | * P33135 | P15070 | flir_ecoli | flin_ecoli |
| P15070 | FLIN_ECOLI | * P33135 | P15070 | flir_ecoli | flin_ecoli |
| P15070 | FLIN_ECOLI | * P0AG07 | P15070 | rpe_ecoli  | flin_ecoli |
| P15070 | FLIN_ECOLI | * P0AGB6 | P15070 | rpoe_ecoli | flin_ecoli |
| P15070 | FLIN_ECOLI | * P16659 | P15070 | syp_ecoli  | flin_ecoli |
| P15070 | FLIN_ECOLI | * P39280 | P15070 | yjek_ecoli | flin_ecoli |
| P0ABY2 | FLIT_ECOLI | * P09030 | P0ABY2 | ex3_ecoli  | flit_ecoli |
| P0ABY2 | FLIT_ECOLI | * P0A6S0 | P0ABY2 | flgh_ecoli | flit_ecoli |
| P0ABY2 | FLIT_ECOLI | * P75942 | P0ABY2 | flgj_ecoli | flit_ecoli |
| P0ABY2 | FLIT_ECOLI | * P24216 | P0ABY2 | flid_ecoli | flit_ecoli |
| P0ABY2 | FLIT_ECOLI | * P52612 | P0ABY2 | flii_ecoli | flit_ecoli |
| P0ABY2 | FLIT_ECOLI | * P52613 | P0ABY2 | flij_ecoli | flit_ecoli |
| P0ABY2 | FLIT_ECOLI | * P0ABY2 | P0ABY2 | flit_ecoli | flit_ecoli |
| P0ABY2 | FLIT_ECOLI | * P09394 | P0ABY2 | glpq_ecoli | flit_ecoli |
| P0ABY2 | FLIT_ECOLI | * P63228 | P0ABY2 | gmhb_ecoli | flit_ecoli |
| P0ABY2 | FLIT_ECOLI | * P0A6Z1 | P0ABY2 | hsca_ecoli | flit_ecoli |
| P0ABY2 | FLIT_ECOLI | * P0A817 | P0ABY2 | metk_ecoli | flit_ecoli |
| P0ABY2 | FLIT_ECOLI | * P0A850 | P0ABY2 | tig_ecoli  | flit_ecoli |
| P0ABY2 | FLIT_ECOLI | * P64616 | P0ABY2 | yhco_ecoli | flit_ecoli |
| P23882 | FMT_ECOLI  | * P0A7V8 | P23882 | rs4_ecoli  | fmt_ecoli  |
| P0A9E5 | FNR_ECOLI  | * P60651 | P0A9E5 | speb_ecoli | fnr_ecoli  |
| P0A9E5 | FNR_ECOLI  | * P52062 | P0A9E5 | yggw_ecoli | fnr_ecoli  |
| P0AC16 | FOLB_ECOLI | * P0A9H5 | P0AC16 | btur_ecoli | folb_ecoli |
| P0AC19 | FOLX_ECOLI | * P43533 | P0AC19 | flgn_ecoli | folx_ecoli |
| P0AC19 | FOLX_ECOLI | * P0AAB2 | P0AC19 | wzb_ecoli  | folx_ecoli |
| P00363 | FRDA_ECOLI | * P0AC47 | P00363 | frdb_ecoli | frda_ecoli |
| P00363 | FRDA_ECOLI | * P31473 | P00363 | rava_ecoli | frda_ecoli |

|        |            |          |        |            |            |
|--------|------------|----------|--------|------------|------------|
| P0AC47 | FRDB_ECOLI | * P00363 | P0AC47 | frda_ecoli | frdb_ecoli |
| P0AC47 | FRDB_ECOLI | * P00363 | P0AC47 | frda_ecoli | frdb_ecoli |
| P0AC47 | FRDB_ECOLI | * P00363 | P0AC47 | frda_ecoli | frdb_ecoli |
| P0AC47 | FRDB_ECOLI | * P00363 | P0AC47 | frda_ecoli | frdb_ecoli |
| P0AC47 | FRDB_ECOLI | * P0A915 | P0AC47 | ompw_ecoli | frdb_ecoli |
| P0AC47 | FRDB_ECOLI | * P0A915 | P0AC47 | ompw_ecoli | frdb_ecoli |
| P0AEN1 | FRE_ECOLI  | * P0ACB4 | P0AEN1 | hemg_ecoli | fre_ecoli  |
| P0AEN1 | FRE_ECOLI  | * P0A9F9 | P0AEN1 | metr_ecoli | fre_ecoli  |
| P0AEN1 | FRE_ECOLI  | * P77569 | P0AEN1 | mhpr_ecoli | fre_ecoli  |
| P0AEN1 | FRE_ECOLI  | * P32173 | P0AEN1 | moba_ecoli | fre_ecoli  |
| P0AEN1 | FRE_ECOLI  | * P0AFW0 | P0AEN1 | rfah_ecoli | fre_ecoli  |
| P0AEN1 | FRE_ECOLI  | * P0A9V8 | P0AEN1 | yihu_ecoli | fre_ecoli  |
| P45544 | FRLR_ECOLI | none     |        |            |            |
| P25437 | FRMA_ECOLI | * P32053 | P25437 | inta_ecoli | frma_ecoli |
| P25437 | FRMA_ECOLI | * P0AAH0 | P25437 | pstb_ecoli | frma_ecoli |
| P0AAP3 | FRMR_ECOLI | none     |        |            |            |
| P32669 | FSAB_ECOLI | * P26281 | P32669 | hpk_ecoli  | fsab_ecoli |
| P0A998 | FTNA_ECOLI | * P0A850 | P0A998 | tig_ecoli  | ftna_ecoli |
| P0A9A2 | FTNB_ECOLI | * P0AG20 | P0A9A2 | rela_ecoli | ftnb_ecoli |
| P46889 | FTSK_ECOLI | * P0A9A6 | P46889 | ftsz_ecoli | ftsk_ecoli |
| P46889 | FTSK_ECOLI | * P05042 | P46889 | fumc_ecoli | ftsk_ecoli |
| P46889 | FTSK_ECOLI | * P0A8T7 | P46889 | rpoc_ecoli | ftsk_ecoli |
| P46889 | FTSK_ECOLI | * P75767 | P46889 | ybhk_ecoli | ftsk_ecoli |
| P06136 | FTSQ_ECOLI | * P0A6J1 | P06136 | cysc_ecoli | ftsq_ecoli |
| P06136 | FTSQ_ECOLI | * P0ABH0 | P06136 | ftsa_ecoli | ftsq_ecoli |
| P06136 | FTSQ_ECOLI | * P0A6S5 | P06136 | ftsb_ecoli | ftsq_ecoli |
| P06136 | FTSQ_ECOLI | * P0AD68 | P06136 | ftsi_ecoli | ftsq_ecoli |
| P06136 | FTSQ_ECOLI | * P0AEN4 | P06136 | ftsl_ecoli | ftsq_ecoli |
| P06136 | FTSQ_ECOLI | * P29131 | P06136 | ftsn_ecoli | ftsq_ecoli |
| P06136 | FTSQ_ECOLI | * P29131 | P06136 | ftsn_ecoli | ftsq_ecoli |
| P06136 | FTSQ_ECOLI | * P06136 | P06136 | ftsq_ecoli | ftsq_ecoli |
| P06136 | FTSQ_ECOLI | * P0AC30 | P06136 | ftsx_ecoli | ftsq_ecoli |
| P06136 | FTSQ_ECOLI | * P0AC30 | P06136 | ftsx_ecoli | ftsq_ecoli |
| P06136 | FTSQ_ECOLI | * P58034 | P06136 | ymgf_ecoli | ftsq_ecoli |
| P06136 | FTSQ_ECOLI | * P58034 | P06136 | ymgf_ecoli | ftsq_ecoli |

|        |            |          |        |             |            |
|--------|------------|----------|--------|-------------|------------|
| P0AC30 | FTSX_ECOLI | * P0AFW4 | P0AC30 | rnk_ecoli   | ftsx_ecoli |
| P0AC30 | FTSX_ECOLI | * P11663 | P0AC30 | yggd_ecoli  | ftsx_ecoli |
| P0A9A6 | FTSZ_ECOLI | * P0ABB4 | P0A9A6 | atpb_ecoli  | ftsز_ecoli |
| P0A9A6 | FTSZ_ECOLI | * P0A9H5 | P0A9A6 | btur_ecoli  | ftsز_ecoli |
| P0A9A6 | FTSZ_ECOLI | * P07364 | P0A9A6 | cher_ecoli  | ftsز_ecoli |
| P0A9A6 | FTSZ_ECOLI | * P0A964 | P0A9A6 | chew_ecoli  | ftsز_ecoli |
| P0A9A6 | FTSZ_ECOLI | * P0ABJ1 | P0A9A6 | cyoa_ecoli  | ftsز_ecoli |
| P0A9A6 | FTSZ_ECOLI | * P76250 | P0A9A6 | dmlr_ecoli  | ftsز_ecoli |
| P0A9A6 | FTSZ_ECOLI | * P0AEL6 | P0A9A6 | fepb_ecoli  | ftsز_ecoli |
| P0A9A6 | FTSZ_ECOLI | * P0A9R7 | P0A9A6 | ftse_ecoli  | ftsز_ecoli |
| P0A9A6 | FTSZ_ECOLI | * P68688 | P0A9A6 | glrx1_ecoli | ftsز_ecoli |
| P0A9A6 | FTSZ_ECOLI | * P0AES4 | P0A9A6 | gyra_ecoli  | ftsز_ecoli |
| P0A9A6 | FTSZ_ECOLI | * P0A6H5 | P0A9A6 | hslu_ecoli  | ftsز_ecoli |
| P0A9A6 | FTSZ_ECOLI | * P0C054 | P0A9A6 | ibpa_ecoli  | ftsز_ecoli |
| P0A9A6 | FTSZ_ECOLI | * P62620 | P0A9A6 | ispg_ecoli  | ftsز_ecoli |
| P0A9A6 | FTSZ_ECOLI | * P0AFG6 | P0A9A6 | odo2_ecoli  | ftsز_ecoli |
| P0A9A6 | FTSZ_ECOLI | * P0AA25 | P0A9A6 | thio_ecoli  | ftsز_ecoli |
| P0A9A6 | FTSZ_ECOLI | * P45424 | P0A9A6 | yhch_ecoli  | ftsز_ecoli |
| P0A9A6 | FTSZ_ECOLI | * P46852 | P0A9A6 | yhhw_ecoli  | ftsز_ecoli |
| P0A9A6 | FTSZ_ECOLI | * P77173 | P0A9A6 | zipa_ecoli  | ftsز_ecoli |
| P0AEN8 | FUCM_ECOLI | * P31473 | P0AEN8 | rava_ecoli  | fucm_ecoli |
| P0AC33 | FUMA_ECOLI | * P0ACB0 | P0AC33 | dnab_ecoli  | fuma_ecoli |
| P0AC33 | FUMA_ECOLI | * P14407 | P0AC33 | fumb_ecoli  | fuma_ecoli |
| P0AC33 | FUMA_ECOLI | * P08142 | P0AC33 | ilvb_ecoli  | fuma_ecoli |
| P0AC33 | FUMA_ECOLI | * P76104 | P0AC33 | ydcp_ecoli  | fuma_ecoli |
| P14407 | FUMB_ECOLI | * P07363 | P14407 | chea_ecoli  | fumb_ecoli |
| P14407 | FUMB_ECOLI | * P07330 | P14407 | cheb_ecoli  | fumb_ecoli |
| P14407 | FUMB_ECOLI | * P0AC33 | P14407 | fuma_ecoli  | fumb_ecoli |
| P14407 | FUMB_ECOLI | * P33595 | P14407 | sgrr_ecoli  | fumb_ecoli |
| P14407 | FUMB_ECOLI | * P33941 | P14407 | yoji_ecoli  | fumb_ecoli |
| P0A9A9 | FUR_ECOLI  | * P0A6A3 | P0A9A9 | acka_ecoli  | fur_ecoli  |
| P0A9A9 | FUR_ECOLI  | * P06134 | P0A9A9 | ada_ecoli   | fur_ecoli  |
| P0A9A9 | FUR_ECOLI  | * P61517 | P0A9A9 | can_ecoli   | fur_ecoli  |
| P0A9A9 | FUR_ECOLI  | * P21179 | P0A9A9 | cate_ecoli  | fur_ecoli  |
| P0A9A9 | FUR_ECOLI  | * P36649 | P0A9A9 | cueo_ecoli  | fur_ecoli  |
| P0A9A9 | FUR_ECOLI  | * P0A6J1 | P0A9A9 | cysc_ecoli  | fur_ecoli  |
| P0A9A9 | FUR_ECOLI  | * P27296 | P0A9A9 | ding_ecoli  | fur_ecoli  |
| P0A9A9 | FUR_ECOLI  | * P65643 | P0A9A9 | eutt_ecoli  | fur_ecoli  |
| P0A9A9 | FUR_ECOLI  | * P0ACC7 | P0A9A9 | glmu_ecoli  | fur_ecoli  |
| P0A9A9 | FUR_ECOLI  | * P0AC69 | P0A9A9 | glrx4_ecoli | fur_ecoli  |



|        |            |          |        |                            |                            |
|--------|------------|----------|--------|----------------------------|----------------------------|
| P0A9A9 | FUR_ECOLI  | * P09372 | P0A9A9 | <a href="#">grpe_ecoli</a> | <a href="#">fur_ecoli</a>  |
| P0A9A9 | FUR_ECOLI  | * P0AAN3 | P0A9A9 | <a href="#">hypb_ecoli</a> | <a href="#">fur_ecoli</a>  |
| P0A9A9 | FUR_ECOLI  | * P0A722 | P0A9A9 | <a href="#">lpxa_ecoli</a> | <a href="#">fur_ecoli</a>  |
| P0A9A9 | FUR_ECOLI  | * P10441 | P0A9A9 | <a href="#">lpxb_ecoli</a> | <a href="#">fur_ecoli</a>  |
| P0A9A9 | FUR_ECOLI  | * P0A9F1 | P0A9A9 | <a href="#">mntr_ecoli</a> | <a href="#">fur_ecoli</a>  |
| P0A9A9 | FUR_ECOLI  | * P12282 | P0A9A9 | <a href="#">moeb_ecoli</a> | <a href="#">fur_ecoli</a>  |
| P0A9A9 | FUR_ECOLI  | * P0AF08 | P0A9A9 | <a href="#">mrp_ecoli</a>  | <a href="#">fur_ecoli</a>  |
| P0A9A9 | FUR_ECOLI  | * P0AF10 | P0A9A9 | <a href="#">mtlr_ecoli</a> | <a href="#">fur_ecoli</a>  |
| P0A9A9 | FUR_ECOLI  | * P10902 | P0A9A9 | <a href="#">nadb_ecoli</a> | <a href="#">fur_ecoli</a>  |
| P0A9A9 | FUR_ECOLI  | * P0AFF6 | P0A9A9 | <a href="#">nusa_ecoli</a> | <a href="#">fur_ecoli</a>  |
| P0A9A9 | FUR_ECOLI  | * P0AFG6 | P0A9A9 | <a href="#">odo2_ecoli</a> | <a href="#">fur_ecoli</a>  |
| P0A9A9 | FUR_ECOLI  | * P0A9K3 | P0A9A9 | <a href="#">phol_ecoli</a> | <a href="#">fur_ecoli</a>  |
| P0A9A9 | FUR_ECOLI  | * P31133 | P0A9A9 | <a href="#">potf_ecoli</a> | <a href="#">fur_ecoli</a>  |
| P0A9A9 | FUR_ECOLI  | * P0A8K1 | P0A9A9 | <a href="#">psd_ecoli</a>  | <a href="#">fur_ecoli</a>  |
| P0A9A9 | FUR_ECOLI  | * P24555 | P0A9A9 | <a href="#">ptrb_ecoli</a> | <a href="#">fur_ecoli</a>  |
| P0A9A9 | FUR_ECOLI  | * P27241 | P0A9A9 | <a href="#">rfaz_ecoli</a> | <a href="#">fur_ecoli</a>  |
| P0A9A9 | FUR_ECOLI  | * P77215 | P0A9A9 | <a href="#">rhmd_ecoli</a> | <a href="#">fur_ecoli</a>  |
| P0A9A9 | FUR_ECOLI  | * P25539 | P0A9A9 | <a href="#">ribd_ecoli</a> | <a href="#">fur_ecoli</a>  |
| P0A9A9 | FUR_ECOLI  | * P0AEI4 | P0A9A9 | <a href="#">rimo_ecoli</a> | <a href="#">fur_ecoli</a>  |
| P0A9A9 | FUR_ECOLI  | * P36999 | P0A9A9 | <a href="#">rlma_ecoli</a> | <a href="#">fur_ecoli</a>  |
| P0A9A9 | FUR_ECOLI  | * P0A7Z4 | P0A9A9 | <a href="#">rpoa_ecoli</a> | <a href="#">fur_ecoli</a>  |
| P0A9A9 | FUR_ECOLI  | * P0A9E2 | P0A9A9 | <a href="#">soxs_ecoli</a> | <a href="#">fur_ecoli</a>  |
| P0A9A9 | FUR_ECOLI  | * P0AA25 | P0A9A9 | <a href="#">thio_ecoli</a> | <a href="#">fur_ecoli</a>  |
| P0A9A9 | FUR_ECOLI  | * P52097 | P0A9A9 | <a href="#">tils_ecoli</a> | <a href="#">fur_ecoli</a>  |
| P0A9A9 | FUR_ECOLI  | * P33570 | P0A9A9 | <a href="#">tk2_ecoli</a>  | <a href="#">fur_ecoli</a>  |
| P0A9A9 | FUR_ECOLI  | * P0A858 | P0A9A9 | <a href="#">tpis_ecoli</a> | <a href="#">fur_ecoli</a>  |
| P0A9A9 | FUR_ECOLI  | * P0AG11 | P0A9A9 | <a href="#">umud_ecoli</a> | <a href="#">fur_ecoli</a>  |
| P0A9A9 | FUR_ECOLI  | * P77414 | P0A9A9 | <a href="#">wcaa_ecoli</a> | <a href="#">fur_ecoli</a>  |
| P0A9A9 | FUR_ECOLI  | * P0A8E5 | P0A9A9 | <a href="#">yacl_ecoli</a> | <a href="#">fur_ecoli</a>  |
| P0A9A9 | FUR_ECOLI  | * P77634 | P0A9A9 | <a href="#">ybcm_ecoli</a> | <a href="#">fur_ecoli</a>  |
| P0A9A9 | FUR_ECOLI  | * P0A8J4 | P0A9A9 | <a href="#">ybed_ecoli</a> | <a href="#">fur_ecoli</a>  |
| P0A9A9 | FUR_ECOLI  | * P76012 | P0A9A9 | <a href="#">ycgy_ecoli</a> | <a href="#">fur_ecoli</a>  |
| P0A9A9 | FUR_ECOLI  | * P76064 | P0A9A9 | <a href="#">ydat_ecoli</a> | <a href="#">fur_ecoli</a>  |
| P0A9A9 | FUR_ECOLI  | * P37774 | P0A9A9 | <a href="#">yecc_ecoli</a> | <a href="#">fur_ecoli</a>  |
| P0A9A9 | FUR_ECOLI  | * P76407 | P0A9A9 | <a href="#">yegs_ecoli</a> | <a href="#">fur_ecoli</a>  |
| P0A9A9 | FUR_ECOLI  | * P33360 | P0A9A9 | <a href="#">yehx_ecoli</a> | <a href="#">fur_ecoli</a>  |
| P0A9A9 | FUR_ECOLI  | * P21437 | P0A9A9 | <a href="#">yggf_ecoli</a> | <a href="#">fur_ecoli</a>  |
| P0A9A9 | FUR_ECOLI  | * P0ADT5 | P0A9A9 | <a href="#">ygic_ecoli</a> | <a href="#">fur_ecoli</a>  |
| P0A9A9 | FUR_ECOLI  | * P0A8W5 | P0A9A9 | <a href="#">yqge_ecoli</a> | <a href="#">fur_ecoli</a>  |
| P37147 | FXSA_ECOLI | none     |        |                            |                            |
| P0A9B2 | G3P1_ECOLI | * P25553 | P0A9B2 | <a href="#">alda_ecoli</a> | <a href="#">g3p1_ecoli</a> |
| P0A9B2 | G3P1_ECOLI | * P0A9H9 | P0A9B2 | <a href="#">chez_ecoli</a> | <a href="#">g3p1_ecoli</a> |
| P0A9B2 | G3P1_ECOLI | * P32662 | P0A9B2 | <a href="#">gph_ecoli</a>  | <a href="#">g3p1_ecoli</a> |

|        |            |   |        |        |                            |                            |
|--------|------------|---|--------|--------|----------------------------|----------------------------|
| P0A9B2 | G3P1_ECOLI | * | P0A6W5 | P0A9B2 | <a href="#">grea_ecoli</a> | <a href="#">g3p1_ecoli</a> |
| P0A9B2 | G3P1_ECOLI | * | P15038 | P0A9B2 | <a href="#">held_ecoli</a> | <a href="#">g3p1_ecoli</a> |
| P0A9B2 | G3P1_ECOLI | * | P0AFH0 | P0A9B2 | <a href="#">ogt_ecoli</a>  | <a href="#">g3p1_ecoli</a> |
| P0A9B2 | G3P1_ECOLI | * | P39286 | P0A9B2 | <a href="#">rsga_ecoli</a> | <a href="#">g3p1_ecoli</a> |
| P0A9B2 | G3P1_ECOLI | * | P0AA25 | P0A9B2 | <a href="#">thio_ecoli</a> | <a href="#">g3p1_ecoli</a> |
| P0A9B2 | G3P1_ECOLI | * | P0AA25 | P0A9B2 | <a href="#">thio_ecoli</a> | <a href="#">g3p1_ecoli</a> |
| P0A9B2 | G3P1_ECOLI | * | P0A850 | P0A9B2 | <a href="#">tig_ecoli</a>  | <a href="#">g3p1_ecoli</a> |
| P0A9B2 | G3P1_ECOLI | * | P0A890 | P0A9B2 | <a href="#">tusa_ecoli</a> | <a href="#">g3p1_ecoli</a> |
| P0A9B2 | G3P1_ECOLI | * | P76464 | P0A9B2 | <a href="#">yfas_ecoli</a> | <a href="#">g3p1_ecoli</a> |
| P0A9B2 | G3P1_ECOLI | * | P52126 | P0A9B2 | <a href="#">yfjk_ecoli</a> | <a href="#">g3p1_ecoli</a> |
| P0A9B2 | G3P1_ECOLI | * | P0ADQ2 | P0A9B2 | <a href="#">yiid_ecoli</a> | <a href="#">g3p1_ecoli</a> |
| P0A9B2 | G3P1_ECOLI | * | P0AF67 | P0A9B2 | <a href="#">yjee_ecoli</a> | <a href="#">g3p1_ecoli</a> |
|        |            |   |        |        |                            |                            |
| P0AC53 | G6PD_ECOLI | * | P77624 | P0AC53 | <a href="#">arcm_ecoli</a> | <a href="#">g6pd_ecoli</a> |
| P0AC53 | G6PD_ECOLI | * | P17446 | P0AC53 | <a href="#">beti_ecoli</a> | <a href="#">g6pd_ecoli</a> |
| P0AC53 | G6PD_ECOLI | * | P13001 | P0AC53 | <a href="#">bioh_ecoli</a> | <a href="#">g6pd_ecoli</a> |
| P0AC53 | G6PD_ECOLI | * | P61517 | P0AC53 | <a href="#">can_ecoli</a>  | <a href="#">g6pd_ecoli</a> |
| P0AC53 | G6PD_ECOLI | * | P00968 | P0AC53 | <a href="#">carb_ecoli</a> | <a href="#">g6pd_ecoli</a> |
| P0AC53 | G6PD_ECOLI | * | P36562 | P0AC53 | <a href="#">cobt_ecoli</a> | <a href="#">g6pd_ecoli</a> |
| P0AC53 | G6PD_ECOLI | * | P15877 | P0AC53 | <a href="#">dhg_ecoli</a>  | <a href="#">g6pd_ecoli</a> |
| P0AC53 | G6PD_ECOLI | * | P26266 | P0AC53 | <a href="#">fepe_ecoli</a> | <a href="#">g6pd_ecoli</a> |
| P0AC53 | G6PD_ECOLI | * | P0AAN9 | P0AC53 | <a href="#">irap_ecoli</a> | <a href="#">g6pd_ecoli</a> |
| P0AC53 | G6PD_ECOLI | * | P04816 | P0AC53 | <a href="#">livk_ecoli</a> | <a href="#">g6pd_ecoli</a> |
| P0AC53 | G6PD_ECOLI | * | P00946 | P0AC53 | <a href="#">mana_ecoli</a> | <a href="#">g6pd_ecoli</a> |
| P0AC53 | G6PD_ECOLI | * | P37355 | P0AC53 | <a href="#">menh_ecoli</a> | <a href="#">g6pd_ecoli</a> |
| P0AC53 | G6PD_ECOLI | * | P16384 | P0AC53 | <a href="#">miaa_ecoli</a> | <a href="#">g6pd_ecoli</a> |
| P0AC53 | G6PD_ECOLI | * | P24205 | P0AC53 | <a href="#">msbb_ecoli</a> | <a href="#">g6pd_ecoli</a> |
| P0AC53 | G6PD_ECOLI | * | P09373 | P0AC53 | <a href="#">pflb_ecoli</a> | <a href="#">g6pd_ecoli</a> |
| P0AC53 | G6PD_ECOLI | * | P18133 | P0AC53 | <a href="#">pncb_ecoli</a> | <a href="#">g6pd_ecoli</a> |
| P0AC53 | G6PD_ECOLI | * | P0ADY1 | P0AC53 | <a href="#">ppid_ecoli</a> | <a href="#">g6pd_ecoli</a> |
| P0AC53 | G6PD_ECOLI | * | P0AG18 | P0AC53 | <a href="#">pure_ecoli</a> | <a href="#">g6pd_ecoli</a> |
| P0AC53 | G6PD_ECOLI | * | P33643 | P0AC53 | <a href="#">rlud_ecoli</a> | <a href="#">g6pd_ecoli</a> |
| P0AC53 | G6PD_ECOLI | * | P0AFW4 | P0AC53 | <a href="#">rnk_ecoli</a>  | <a href="#">g6pd_ecoli</a> |
| P0AC53 | G6PD_ECOLI | * | P16095 | P0AC53 | <a href="#">sdhl_ecoli</a> | <a href="#">g6pd_ecoli</a> |
| P0AC53 | G6PD_ECOLI | * | P0A9E2 | P0AC53 | <a href="#">soxs_ecoli</a> | <a href="#">g6pd_ecoli</a> |
| P0AC53 | G6PD_ECOLI | * | P0A836 | P0AC53 | <a href="#">succ_ecoli</a> | <a href="#">g6pd_ecoli</a> |
| P0AC53 | G6PD_ECOLI | * | P36680 | P0AC53 | <a href="#">yacf_ecoli</a> | <a href="#">g6pd_ecoli</a> |
| P0AC53 | G6PD_ECOLI | * | P0A8E5 | P0AC53 | <a href="#">yacl_ecoli</a> | <a href="#">g6pd_ecoli</a> |
| P0AC53 | G6PD_ECOLI | * | P52096 | P0AC53 | <a href="#">yaer_ecoli</a> | <a href="#">g6pd_ecoli</a> |
| P0AC53 | G6PD_ECOLI | * | P0AAN5 | P0AC53 | <a href="#">yaia_ecoli</a> | <a href="#">g6pd_ecoli</a> |
| P0AC53 | G6PD_ECOLI | * | P77301 | P0AC53 | <a href="#">ybap_ecoli</a> | <a href="#">g6pd_ecoli</a> |
| P0AC53 | G6PD_ECOLI | * | P0AAS9 | P0AC53 | <a href="#">ybdd_ecoli</a> | <a href="#">g6pd_ecoli</a> |
| P0AC53 | G6PD_ECOLI | * | P77806 | P0AC53 | <a href="#">ybdl_ecoli</a> | <a href="#">g6pd_ecoli</a> |
| P0AC53 | G6PD_ECOLI | * | P77174 | P0AC53 | <a href="#">ybdm_ecoli</a> | <a href="#">g6pd_ecoli</a> |
| P0AC53 | G6PD_ECOLI | * | P77216 | P0AC53 | <a href="#">ybdn_ecoli</a> | <a href="#">g6pd_ecoli</a> |

|        |            |          |        |             |            |
|--------|------------|----------|--------|-------------|------------|
| P0AC53 | G6PD_ECOLI | * P0AAV4 | P0AC53 | ybgj_ecoli  | g6pd_ecoli |
| P0AC53 | G6PD_ECOLI | * P0AA84 | P0AC53 | ybho_ecoli  | g6pd_ecoli |
| P0AC53 | G6PD_ECOLI | * P75791 | P0AC53 | ybiu_ecoli  | g6pd_ecoli |
| P0AC53 | G6PD_ECOLI | * P77704 | P0AC53 | ydji_ecoli  | g6pd_ecoli |
| P0AC53 | G6PD_ECOLI | * P46852 | P0AC53 | yhhw_ecoli  | g6pd_ecoli |
| P0A6T1 | G6PI_ECOLI | * P0C8J8 | P0A6T1 | gatz_ecoli  | g6pi_ecoli |
| P0A6T1 | G6PI_ECOLI | * P71229 | P0A6T1 | hyfr_ecoli  | g6pi_ecoli |
| P0A6T1 | G6PI_ECOLI | * P69405 | P0A6T1 | rca_s_ecoli | g6pi_ecoli |
| P0A6T1 | G6PI_ECOLI | * P30137 | P0A6T1 | thie_ecoli  | g6pi_ecoli |
| P0A6T1 | G6PI_ECOLI | * P76423 | P0A6T1 | thim_ecoli  | g6pi_ecoli |
| P0A6T1 | G6PI_ECOLI | * P33919 | P0A6T1 | yejh_ecoli  | g6pi_ecoli |
| P0A6T1 | G6PI_ECOLI | * P37627 | P0A6T1 | yhij_ecoli  | g6pi_ecoli |
| P63235 | GADC_ECOLI | none     |        |             |            |
| P37639 | GADX_ECOLI | * P0AEW4 | P37639 | icc_ecoli   | gadx_ecoli |
| P37639 | GADX_ECOLI | * P24218 | P37639 | intd_ecoli  | gadx_ecoli |
| P37639 | GADX_ECOLI | * P0A6L4 | P37639 | nana_ecoli  | gadx_ecoli |
| P37639 | GADX_ECOLI | * P00579 | P37639 | rpod_ecoli  | gadx_ecoli |
| P09147 | GALE_ECOLI | none     |        |             |            |
| P0AAB6 | GALF_ECOLI | * P24174 | P0AAB6 | manc_ecoli  | galf_ecoli |
| P0AAB6 | GALF_ECOLI | * P23909 | P0AAB6 | muts_ecoli  | galf_ecoli |
| P0AAB6 | GALF_ECOLI | * P17802 | P0AAB6 | muty_ecoli  | galf_ecoli |
| P0AAB6 | GALF_ECOLI | * P17888 | P0AAB6 | pria_ecoli  | galf_ecoli |
| P0AAB6 | GALF_ECOLI | * P33643 | P0AAB6 | rlud_ecoli  | galf_ecoli |
| P0AAB6 | GALF_ECOLI | * P33020 | P0AAB6 | yeii_ecoli  | galf_ecoli |
| P0AAB6 | GALF_ECOLI | * P38521 | P0AAB6 | yggj_ecoli  | galf_ecoli |
| P0AAB6 | GALF_ECOLI | * P0ADT5 | P0AAB6 | ygic_ecoli  | galf_ecoli |
| P0AAB6 | GALF_ECOLI | * P0ACV8 | P0AAB6 | ymja_ecoli  | galf_ecoli |
| P0A9C3 | GALM_ECOLI | * P0AC28 | P0A9C3 | ygfa_ecoli  | galm_ecoli |
| P03024 | GALR_ECOLI | * P00892 | P03024 | ilvg_ecoli  | galr_ecoli |
| P03024 | GALR_ECOLI | * P21893 | P03024 | recj_ecoli  | galr_ecoli |
| P0AEP3 | GALU_ECOLI | * P0AAB6 | P0AEP3 | galf_ecoli  | galu_ecoli |
| P0AEP3 | GALU_ECOLI | * P0A7B3 | P0AEP3 | ppnk_ecoli  | galu_ecoli |
| P0A9S3 | GATD_ECOLI | * P0A850 | P0A9S3 | tig_ecoli   | gatd_ecoli |
| P0C8J6 | GATY_ECOLI | * P0A6F5 | P0C8J6 | ch60_ecoli  | gaty_ecoli |
| P0C8J6 | GATY_ECOLI | * P08622 | P0C8J6 | dnaj_ecoli  | gaty_ecoli |

|        |            |   |        |        |             |            |
|--------|------------|---|--------|--------|-------------|------------|
| POC8J6 | GATY_ECOLI | * | P0A9A6 | POC8J6 | ftsz_ecoli  | gaty_ecoli |
| POC8J6 | GATY_ECOLI | * | P0C8J8 | POC8J6 | gatz_ecoli  | gaty_ecoli |
| POC8J6 | GATY_ECOLI | * | P0C054 | POC8J6 | ibpa_ecoli  | gaty_ecoli |
| POC8J6 | GATY_ECOLI | * | P0C058 | POC8J6 | ibpb_ecoli  | gaty_ecoli |
| POC8J6 | GATY_ECOLI | * | P0A9X4 | POC8J6 | mreb_ecoli  | gaty_ecoli |
| POC8J6 | GATY_ECOLI | * | P0AAH0 | POC8J6 | pstb_ecoli  | gaty_ecoli |
| POC8J6 | GATY_ECOLI | * | P36979 | POC8J6 | rlmn_ecoli  | gaty_ecoli |
| POC8J8 | GATZ_ECOLI | * | P69503 | POC8J8 | apt_ecoli   | gatz_ecoli |
| POC8J8 | GATZ_ECOLI | * | P0A9B2 | POC8J8 | g3p1_ecoli  | gatz_ecoli |
| POC8J8 | GATZ_ECOLI | * | P0A6W5 | POC8J8 | grea_ecoli  | gatz_ecoli |
| POC8J8 | GATZ_ECOLI | * | P0A6H5 | POC8J8 | hslu_ecoli  | gatz_ecoli |
| POC8J8 | GATZ_ECOLI | * | P23256 | POC8J8 | maly_ecoli  | gatz_ecoli |
| POC8J8 | GATZ_ECOLI | * | P0AF12 | POC8J8 | mtnn_ecoli  | gatz_ecoli |
| POC8J8 | GATZ_ECOLI | * | P0A7E9 | POC8J8 | pyrh_ecoli  | gatz_ecoli |
| POC8J8 | GATZ_ECOLI | * | P60723 | POC8J8 | rl4_ecoli   | gatz_ecoli |
| POC8J8 | GATZ_ECOLI | * | P10408 | POC8J8 | seca_ecoli  | gatz_ecoli |
| POC8J8 | GATZ_ECOLI | * | P0A8L1 | POC8J8 | sys_ecoli   | gatz_ecoli |
| POC8J8 | GATZ_ECOLI | * | P0A850 | POC8J8 | tig_ecoli   | gatz_ecoli |
| POC8J9 | GATZ_ECOLX |   |        |        |             |            |
| P33195 | GCSP_ECOLI | * | P0A9F3 | P33195 | cysb_ecoli  | gcsp_ecoli |
| P33195 | GCSP_ECOLI | * | P15038 | P33195 | held_ecoli  | gcsp_ecoli |
| P33195 | GCSP_ECOLI | * | P28630 | P33195 | hola_ecoli  | gcsp_ecoli |
| P33195 | GCSP_ECOLI | * | Q46920 | P33195 | quef_ecoli  | gcsp_ecoli |
| P27248 | GCST_ECOLI |   | none   |        |             |            |
| P75913 | GHRA_ECOLI |   | none   |        |             |            |
| P0A9S5 | GLDA_ECOLI | * | P0A850 | P0A9S5 | tig_ecoli   | glda_ecoli |
| P37747 | GLF_ECOLI  | * | P11868 | P37747 | tdcd_ecoli  | glf_ecoli  |
| P0A6V8 | GLK_ECOLI  | * | P0A850 | P0A6V8 | tig_ecoli   | glk_ecoli  |
| P17169 | GLMS_ECOLI | * | P62615 | P17169 | ispe_ecoli  | glms_ecoli |
| P0A9C5 | GLNA_ECOLI | * | P0A996 | P0A9C5 | glpc_ecoli  | glna_ecoli |
| P0A9C5 | GLNA_ECOLI | * | Q46915 | P0A9C5 | gudx_ecoli  | glna_ecoli |
| P0A9C5 | GLNA_ECOLI | * | P77150 | P0A9C5 | pdxyc_ecoli | glna_ecoli |
| P0A9C5 | GLNA_ECOLI | * | P0A890 | P0A9C5 | tusa_ecoli  | glna_ecoli |
| P27249 | GLND_ECOLI | * | P05052 | P27249 | appy_ecoli  | glnd_ecoli |

|        |            |   |        |        |                            |                            |
|--------|------------|---|--------|--------|----------------------------|----------------------------|
| P27249 | GLND_ECOLI | * | P21179 | P27249 | <a href="#">cate_ecoli</a> | <a href="#">glnd_ecoli</a> |
| P27249 | GLND_ECOLI | * | P23878 | P27249 | <a href="#">fepc_ecoli</a> | <a href="#">glnd_ecoli</a> |
| P27249 | GLND_ECOLI | * | P10121 | P27249 | <a href="#">ftsy_ecoli</a> | <a href="#">glnd_ecoli</a> |
| P27249 | GLND_ECOLI | * | P0A9Z1 | P27249 | <a href="#">glnb_ecoli</a> | <a href="#">glnd_ecoli</a> |
| P27249 | GLND_ECOLI | * | P0A9Z1 | P27249 | <a href="#">glnb_ecoli</a> | <a href="#">glnd_ecoli</a> |
| P27249 | GLND_ECOLI | * | P0AC55 | P27249 | <a href="#">glnk_ecoli</a> | <a href="#">glnd_ecoli</a> |
| P27249 | GLND_ECOLI | * | P0AC88 | P27249 | <a href="#">gm4d_ecoli</a> | <a href="#">glnd_ecoli</a> |
| P27249 | GLND_ECOLI | * | P28905 | P27249 | <a href="#">holc_ecoli</a> | <a href="#">glnd_ecoli</a> |
| P27249 | GLND_ECOLI | * | P24205 | P27249 | <a href="#">msbb_ecoli</a> | <a href="#">glnd_ecoli</a> |
| P27249 | GLND_ECOLI | * | P17443 | P27249 | <a href="#">murg_ecoli</a> | <a href="#">glnd_ecoli</a> |
| P27249 | GLND_ECOLI | * | P76422 | P27249 | <a href="#">thid_ecoli</a> | <a href="#">glnd_ecoli</a> |
| P27249 | GLND_ECOLI | * | P0AAQ2 | P27249 | <a href="#">yajd_ecoli</a> | <a href="#">glnd_ecoli</a> |
| P0AEQ3 | GLNH_ECOLI |   | none   |        |                            |                            |
| P0AEQ6 | GLNP_ECOLI |   | none   |        |                            |                            |
| P13035 | GLPD_ECOLI | * | P77580 | P13035 | <a href="#">acdh_ecoli</a> | <a href="#">glpd_ecoli</a> |
| P13035 | GLPD_ECOLI | * | P0ACS9 | P13035 | <a href="#">acrr_ecoli</a> | <a href="#">glpd_ecoli</a> |
| P13035 | GLPD_ECOLI | * | P00561 | P13035 | <a href="#">ak1h_ecoli</a> | <a href="#">glpd_ecoli</a> |
| P13035 | GLPD_ECOLI | * | P0ABB4 | P13035 | <a href="#">atpb_ecoli</a> | <a href="#">glpd_ecoli</a> |
| P13035 | GLPD_ECOLI | * | P0ABA4 | P13035 | <a href="#">atpd_ecoli</a> | <a href="#">glpd_ecoli</a> |
| P13035 | GLPD_ECOLI | * | P17446 | P13035 | <a href="#">beti_ecoli</a> | <a href="#">glpd_ecoli</a> |
| P13035 | GLPD_ECOLI | * | P11989 | P13035 | <a href="#">bglg_ecoli</a> | <a href="#">glpd_ecoli</a> |
| P13035 | GLPD_ECOLI | * | P61517 | P13035 | <a href="#">can_ecoli</a>  | <a href="#">glpd_ecoli</a> |
| P13035 | GLPD_ECOLI | * | P00968 | P13035 | <a href="#">carb_ecoli</a> | <a href="#">glpd_ecoli</a> |
| P13035 | GLPD_ECOLI | * | P0A9H9 | P13035 | <a href="#">chez_ecoli</a> | <a href="#">glpd_ecoli</a> |
| P13035 | GLPD_ECOLI | * | P69330 | P13035 | <a href="#">citd_ecoli</a> | <a href="#">glpd_ecoli</a> |
| P13035 | GLPD_ECOLI | * | P36562 | P13035 | <a href="#">cobt_ecoli</a> | <a href="#">glpd_ecoli</a> |
| P13035 | GLPD_ECOLI | * | Q59385 | P13035 | <a href="#">copa_ecoli</a> | <a href="#">glpd_ecoli</a> |
| P13035 | GLPD_ECOLI | * | P0ABJ1 | P13035 | <a href="#">cyoa_ecoli</a> | <a href="#">glpd_ecoli</a> |
| P13035 | GLPD_ECOLI | * | P11557 | P13035 | <a href="#">damx_ecoli</a> | <a href="#">glpd_ecoli</a> |
| P13035 | GLPD_ECOLI | * | P69908 | P13035 | <a href="#">dcea_ecoli</a> | <a href="#">glpd_ecoli</a> |
| P13035 | GLPD_ECOLI | * | P69908 | P13035 | <a href="#">dcea_ecoli</a> | <a href="#">glpd_ecoli</a> |
| P13035 | GLPD_ECOLI | * | P15877 | P13035 | <a href="#">dhg_ecoli</a>  | <a href="#">glpd_ecoli</a> |
| P13035 | GLPD_ECOLI | * | P0AEE8 | P13035 | <a href="#">dma_ecoli</a>  | <a href="#">glpd_ecoli</a> |
| P13035 | GLPD_ECOLI | * | P77510 | P13035 | <a href="#">dpib_ecoli</a> | <a href="#">glpd_ecoli</a> |
| P13035 | GLPD_ECOLI | * | P15047 | P13035 | <a href="#">enta_ecoli</a> | <a href="#">glpd_ecoli</a> |
| P13035 | GLPD_ECOLI | * | P0ADI4 | P13035 | <a href="#">entb_ecoli</a> | <a href="#">glpd_ecoli</a> |
| P13035 | GLPD_ECOLI | * | P0ACC3 | P13035 | <a href="#">erpa_ecoli</a> | <a href="#">glpd_ecoli</a> |
| P13035 | GLPD_ECOLI | * | P0AEK2 | P13035 | <a href="#">fabg_ecoli</a> | <a href="#">glpd_ecoli</a> |
| P13035 | GLPD_ECOLI | * | P0AEL6 | P13035 | <a href="#">fepb_ecoli</a> | <a href="#">glpd_ecoli</a> |
| P13035 | GLPD_ECOLI | * | P23878 | P13035 | <a href="#">fepc_ecoli</a> | <a href="#">glpd_ecoli</a> |
| P13035 | GLPD_ECOLI | * | P26266 | P13035 | <a href="#">fepe_ecoli</a> | <a href="#">glpd_ecoli</a> |
| P13035 | GLPD_ECOLI | * | P0AEM0 | P13035 | <a href="#">fkbx_ecoli</a> | <a href="#">glpd_ecoli</a> |

|        |            |   |        |        |            |            |
|--------|------------|---|--------|--------|------------|------------|
| P13035 | GLPD_ECOLI | * | P15286 | P13035 | flk_ecoli  | glpd_ecoli |
| P13035 | GLPD_ECOLI | * | P25437 | P13035 | frma_ecoli | glpd_ecoli |
| P13035 | GLPD_ECOLI | * | P0AAP3 | P13035 | frmr_ecoli | glpd_ecoli |
| P13035 | GLPD_ECOLI | * | P0A9S3 | P13035 | gatd_ecoli | glpd_ecoli |
| P13035 | GLPD_ECOLI | * | P27249 | P13035 | glnd_ecoli | glpd_ecoli |
| P13035 | GLPD_ECOLI | * | P23871 | P13035 | hemh_ecoli | glpd_ecoli |
| P13035 | GLPD_ECOLI | * | P51020 | P13035 | hoa_ecoli  | glpd_ecoli |
| P13035 | GLPD_ECOLI | * | P0AAN9 | P13035 | irap_ecoli | glpd_ecoli |
| P13035 | GLPD_ECOLI | * | P00547 | P13035 | khse_ecoli | glpd_ecoli |
| P13035 | GLPD_ECOLI | * | P22731 | P13035 | livf_ecoli | glpd_ecoli |
| P13035 | GLPD_ECOLI | * | P10441 | P13035 | lpxb_ecoli | glpd_ecoli |
| P13035 | GLPD_ECOLI | * | P43341 | P13035 | lpxh_ecoli | glpd_ecoli |
| P13035 | GLPD_ECOLI | * | P77397 | P13035 | mhpa_ecoli | glpd_ecoli |
| P13035 | GLPD_ECOLI | * | P0ABR9 | P13035 | mhpb_ecoli | glpd_ecoli |
| P13035 | GLPD_ECOLI | * | P33358 | P13035 | mlra_ecoli | glpd_ecoli |
| P13035 | GLPD_ECOLI | * | P24205 | P13035 | msbb_ecoli | glpd_ecoli |
| P13035 | GLPD_ECOLI | * | P17443 | P13035 | murg_ecoli | glpd_ecoli |
| P13035 | GLPD_ECOLI | * | P0A9K7 | P13035 | phou_ecoli | glpd_ecoli |
| P13035 | GLPD_ECOLI | * | P23869 | P13035 | ppib_ecoli | glpd_ecoli |
| P13035 | GLPD_ECOLI | * | P0ADY1 | P13035 | ppid_ecoli | glpd_ecoli |
| P13035 | GLPD_ECOLI | * | P0AAH0 | P13035 | pstb_ecoli | glpd_ecoli |
| P13035 | GLPD_ECOLI | * | P33025 | P13035 | psug_ecoli | glpd_ecoli |
| P13035 | GLPD_ECOLI | * | P77756 | P13035 | quec_ecoli | glpd_ecoli |
| P13035 | GLPD_ECOLI | * | P0A7H0 | P13035 | refc_ecoli | glpd_ecoli |
| P13035 | GLPD_ECOLI | * | P24173 | P13035 | rfac_ecoli | glpd_ecoli |
| P13035 | GLPD_ECOLI | * | P0AG40 | P13035 | ribf_ecoli | glpd_ecoli |
| P13035 | GLPD_ECOLI | * | P33643 | P13035 | rlud_ecoli | glpd_ecoli |
| P13035 | GLPD_ECOLI | * | P0AGB6 | P13035 | rpoe_ecoli | glpd_ecoli |
| P13035 | GLPD_ECOLI | * | P00956 | P13035 | syi_ecoli  | glpd_ecoli |
| P13035 | GLPD_ECOLI | * | P30136 | P13035 | thic_ecoli | glpd_ecoli |
| P13035 | GLPD_ECOLI | * | P75728 | P13035 | ubif_ecoli | glpd_ecoli |
| P13035 | GLPD_ECOLI | * | P17993 | P13035 | ubig_ecoli | glpd_ecoli |
| P13035 | GLPD_ECOLI | * | P39177 | P13035 | uspg_ecoli | glpd_ecoli |
| P13035 | GLPD_ECOLI | * | P27836 | P13035 | wecg_ecoli | glpd_ecoli |
| P13035 | GLPD_ECOLI | * | P36680 | P13035 | yacf_ecoli | glpd_ecoli |
| P13035 | GLPD_ECOLI | * | P0A8E5 | P13035 | yacl_ecoli | glpd_ecoli |
| P13035 | GLPD_ECOLI | * | P36879 | P13035 | yadg_ecoli | glpd_ecoli |
| P13035 | GLPD_ECOLI | * | P0A8D3 | P13035 | yaii_ecoli | glpd_ecoli |
| P13035 | GLPD_ECOLI | * | P77301 | P13035 | ybap_ecoli | glpd_ecoli |
| P13035 | GLPD_ECOLI | * | P0AFP4 | P13035 | ybbo_ecoli | glpd_ecoli |
| P13035 | GLPD_ECOLI | * | P0AAS9 | P13035 | ybdd_ecoli | glpd_ecoli |
| P13035 | GLPD_ECOLI | * | P45579 | P13035 | ybdh_ecoli | glpd_ecoli |
| P13035 | GLPD_ECOLI | * | P0AA84 | P13035 | ybho_ecoli | glpd_ecoli |
| P13035 | GLPD_ECOLI | * | P0AAW1 | P13035 | ybhp_ecoli | glpd_ecoli |
| P13035 | GLPD_ECOLI | * | P77337 | P13035 | ydis_ecoli | glpd_ecoli |



|        |             |   |        |        |             |             |
|--------|-------------|---|--------|--------|-------------|-------------|
| P13035 | GLPD_ECOLI  | * | P0A959 | P13035 | yfbq_ecoli  | glpd_ecoli  |
| P13035 | GLPD_ECOLI  | * | P77775 | P13035 | yfch_ecoli  | glpd_ecoli  |
| P13035 | GLPD_ECOLI  | * | P09996 | P13035 | yidb_ecoli  | glpd_ecoli  |
| P13035 | GLPD_ECOLI  | * | P0ACM9 | P13035 | yihl_ecoli  | glpd_ecoli  |
| P13035 | GLPD_ECOLI  | * | P32162 | P13035 | yiis_ecoli  | glpd_ecoli  |
| P13035 | GLPD_ECOLI  | * | P0AF76 | P13035 | yjfi_ecoli  | glpd_ecoli  |
| P13035 | GLPD_ECOLI  | * | Q46856 | P13035 | yqhd_ecoli  | glpd_ecoli  |
| P0A6F3 | GLPK_ECOLI  | * | P0ACN4 | P0A6F3 | allr_ecoli  | glpk_ecoli  |
| P0A6F3 | GLPK_ECOLI  | * | P76215 | P0A6F3 | aste_ecoli  | glpk_ecoli  |
| P0A6F3 | GLPK_ECOLI  | * | P0AE72 | P0A6F3 | chpr_ecoli  | glpk_ecoli  |
| P0A6F3 | GLPK_ECOLI  | * | P0A9Y6 | P0A6F3 | cspc_ecoli  | glpk_ecoli  |
| P0A6F3 | GLPK_ECOLI  | * | P0ABS1 | P0A6F3 | dksa_ecoli  | glpk_ecoli  |
| P0A6F3 | GLPK_ECOLI  | * | P76250 | P0A6F3 | dmlr_ecoli  | glpk_ecoli  |
| P0A6F3 | GLPK_ECOLI  | * | P0A6P9 | P0A6F3 | eno_ecoli   | glpk_ecoli  |
| P0A6F3 | GLPK_ECOLI  | * | P0A9R4 | P0A6F3 | fer_ecoli   | glpk_ecoli  |
| P0A6F3 | GLPK_ECOLI  | * | P0A9H1 | P0A6F3 | mug_ecoli   | glpk_ecoli  |
| P0A6F3 | GLPK_ECOLI  | * | P0A8E5 | P0A6F3 | yacl_ecoli  | glpk_ecoli  |
| P0A6F3 | GLPK_ECOLI  | * | P33916 | P0A6F3 | yejf_ecoli  | glpk_ecoli  |
| P0A6F3 | GLPK_ECOLI  | * | P77196 | P0A6F3 | yfcu_ecoli  | glpk_ecoli  |
| P0A6F3 | GLPK_ECOLI  | * | P76513 | P0A6F3 | yfdq_ecoli  | glpk_ecoli  |
| P0A6F3 | GLPK_ECOLI  | * | P67080 | P0A6F3 | yggg_ecoli  | glpk_ecoli  |
| P0A6F3 | GLPK_ECOLI  | * | P77379 | P0A6F3 | ykgd_ecoli  | glpk_ecoli  |
| P0AC59 | GLRX2_ECOLI | * | P0A8F4 | P0AC59 | urk_ecoli   | glrx2_ecoli |
| P0AC62 | GLRX3_ECOLI | * | P33025 | P0AC62 | psug_ecoli  | glrx3_ecoli |
| P0AC69 | GLRX4_ECOLI | * | P0ABE2 | P0AC69 | bola_ecoli  | glrx4_ecoli |
| P77454 | GLSA1_ECOLI |   | none   |        |             |             |
| P09831 | GLTB_ECOLI  | * | P37617 | P09831 | atzn_ecoli  | gltb_ecoli  |
| P09831 | GLTB_ECOLI  | * | P77488 | P09831 | dxs_ecoli   | gltb_ecoli  |
| P09831 | GLTB_ECOLI  | * | P0ADI4 | P09831 | entb_ecoli  | gltb_ecoli  |
| P09831 | GLTB_ECOLI  | * | P0AEM0 | P09831 | fbx_ecoli   | gltb_ecoli  |
| P09831 | GLTB_ECOLI  | * | P09832 | P09831 | glt_d_ecoli | gltb_ecoli  |
| P09831 | GLTB_ECOLI  | * | P09832 | P09831 | glt_d_ecoli | gltb_ecoli  |
| P09831 | GLTB_ECOLI  | * | P06987 | P09831 | his7_ecoli  | gltb_ecoli  |
| P09831 | GLTB_ECOLI  | * | P13009 | P09831 | meth_ecoli  | gltb_ecoli  |
| P09831 | GLTB_ECOLI  | * | P37757 | P09831 | ydde_ecoli  | gltb_ecoli  |
| P09832 | GLTD_ECOLI  | * | P24240 | P09832 | ascb_ecoli  | glt_d_ecoli |
| P09832 | GLTD_ECOLI  | * | P11880 | P09832 | murf_ecoli  | glt_d_ecoli |
| P09832 | GLTD_ECOLI  | * | P31600 | P09832 | nfra_ecoli  | glt_d_ecoli |

|        |            |   |        |        |            |             |
|--------|------------|---|--------|--------|------------|-------------|
| P09832 | GLTD_ECOLI | * | P21889 | P09832 | syd_ecoli  | glt_d_ecoli |
| P09832 | GLTD_ECOLI | * | P17994 | P09832 | yfaa_ecoli | glt_d_ecoli |
| P0A825 | GLYA_ECOLI | * | P0A6A3 | P0A825 | acka_ecoli | glya_ecoli  |
| P0A825 | GLYA_ECOLI | * | P24232 | P0A825 | hmp_ecoli  | glya_ecoli  |
| P0A825 | GLYA_ECOLI | * | P38393 | P0A825 | kil_ecoli  | glya_ecoli  |
| P63224 | GMHA_ECOLI |   | none   |        |            |             |
| P63228 | GMHB_ECOLI | * | P13024 | P63228 | fdhe_ecoli | gmhb_ecoli  |
| P63228 | GMHB_ECOLI | * | P00579 | P63228 | rpod_ecoli | gmhb_ecoli  |
| P0AC92 | GNSA_ECOLI | * | P0A6Z1 | P0AC92 | hsca_ecoli | gnsa_ecoli  |
| P0AC92 | GNSA_ECOLI | * | P38393 | P0AC92 | kil_ecoli  | gnsa_ecoli  |
| P77695 | GNSB_ECOLI |   | none   |        |            |             |
| P0ACP5 | GNTR_ECOLI |   | none   |        |            |             |
| P46846 | GNTX_ECOLI |   | none   |        |            |             |
| P0A6S7 | GPDA_ECOLI |   | none   |        |            |             |
| P62707 | GPMA_ECOLI | * | P0A9C3 | P62707 | galm_ecoli | gpma_ecoli  |
| P62707 | GPMA_ECOLI | * | P0C054 | P62707 | ibpa_ecoli | gpma_ecoli  |
| P62707 | GPMA_ECOLI | * | P75792 | P62707 | suph_ecoli | gpma_ecoli  |
| P62707 | GPMA_ECOLI | * | P71296 | P62707 | yagm_ecoli | gpma_ecoli  |
| P0A7A2 | GPMB_ECOLI | * | P0AE76 | P0A7A2 | cobu_ecoli | gpmb_ecoli  |
| P0A7A2 | GPMB_ECOLI | * | P0A6H5 | P0A7A2 | hslu_ecoli | gpmb_ecoli  |
| P0A7A2 | GPMB_ECOLI | * | P0AFD6 | P0A7A2 | nuoi_ecoli | gpmb_ecoli  |
| P0A7A2 | GPMB_ECOLI | * | P75713 | P0A7A2 | ylba_ecoli | gpmb_ecoli  |
| P37689 | GPMI_ECOLI | * | P0AE08 | P37689 | ahpc_ecoli | gpmi_ecoli  |
| P37689 | GPMI_ECOLI | * | P62707 | P37689 | gpma_ecoli | gpmi_ecoli  |
| P68066 | GRCA_ECOLI | * | P09373 | P68066 | pflb_ecoli | grca_ecoli  |
| P68066 | GRCA_ECOLI | * | P09373 | P68066 | pflb_ecoli | grca_ecoli  |
| P68066 | GRCA_ECOLI | * | P77756 | P68066 | quec_ecoli | grca_ecoli  |
| P68066 | GRCA_ECOLI | * | P0A9K9 | P68066 | slyd_ecoli | grca_ecoli  |
| P68066 | GRCA_ECOLI | * | P0A8N5 | P68066 | syk2_ecoli | grca_ecoli  |
| P68066 | GRCA_ECOLI | * | P0A858 | P68066 | tpis_ecoli | grca_ecoli  |
| P68066 | GRCA_ECOLI | * | P0A858 | P68066 | tpis_ecoli | grca_ecoli  |
| P68066 | GRCA_ECOLI | * | P75990 | P68066 | ycgf_ecoli | grca_ecoli  |

|        |            |   |        |        |               |             |
|--------|------------|---|--------|--------|---------------|-------------|
| P0A6W5 | GREA_ECOLI | * | P24182 | P0A6W5 | acc_e_coli    | grea_e_coli |
| P0A6W5 | GREA_ECOLI | * | P0A6A3 | P0A6W5 | acka_e_coli   | grea_e_coli |
| P0A6W5 | GREA_ECOLI | * | P0A6G7 | P0A6W5 | clpp_e_coli   | grea_e_coli |
| P0A6W5 | GREA_ECOLI | * | P0ACF4 | P0A6W5 | dbhb_e_coli   | grea_e_coli |
| P0A6W5 | GREA_ECOLI | * | P00861 | P0A6W5 | dcda_e_coli   | grea_e_coli |
| P0A6W5 | GREA_ECOLI | * | P0ABS1 | P0A6W5 | dksa_e_coli   | grea_e_coli |
| P0A6W5 | GREA_ECOLI | * | P23484 | P0A6W5 | feci_e_coli   | grea_e_coli |
| P0A6W5 | GREA_ECOLI | * | P0AEM0 | P0A6W5 | fkbx_e_coli   | grea_e_coli |
| P0A6W5 | GREA_ECOLI | * | P37147 | P0A6W5 | fxsa_e_coli   | grea_e_coli |
| P0A6W5 | GREA_ECOLI | * | P09372 | P0A6W5 | grpe_e_coli   | grea_e_coli |
| P0A6W5 | GREA_ECOLI | * | P77319 | P0A6W5 | hsc_e_coli    | grea_e_coli |
| P0A6W5 | GREA_ECOLI | * | P0A705 | P0A6W5 | if2_e_coli    | grea_e_coli |
| P0A6W5 | GREA_ECOLI | * | P0A6B7 | P0A6W5 | iscs_e_coli   | grea_e_coli |
| P0A6W5 | GREA_ECOLI | * | P76356 | P0A6W5 | p76358_e_coli | grea_e_coli |
| P0A6W5 | GREA_ECOLI | * | P0A7L8 | P0A6W5 | rl27_e_coli   | grea_e_coli |
| P0A6W5 | GREA_ECOLI | * | P0A7Z4 | P0A6W5 | rpoa_e_coli   | grea_e_coli |
| P0A6W5 | GREA_ECOLI | * | P0AFZ3 | P0A6W5 | sspb_e_coli   | grea_e_coli |
| P0A6W5 | GREA_ECOLI | * | P37610 | P0A6W5 | taud_e_coli   | grea_e_coli |
| P0A6W5 | GREA_ECOLI | * | P75991 | P0A6W5 | ycgz_e_coli   | grea_e_coli |
| P0A6W5 | GREA_ECOLI | * | P32162 | P0A6W5 | yiis_e_coli   | grea_e_coli |
| P09372 | GRPE_ECOLI | * | P0A6F5 | P09372 | ch60_e_coli   | grpe_e_coli |
| P09372 | GRPE_ECOLI | * | P0A6H1 | P09372 | clpx_e_coli   | grpe_e_coli |
| P09372 | GRPE_ECOLI | * | P0A6Y8 | P09372 | dnak_e_coli   | grpe_e_coli |
| P09372 | GRPE_ECOLI | * | P0A6Y8 | P09372 | dnak_e_coli   | grpe_e_coli |
| P09372 | GRPE_ECOLI | * | P0A6Y8 | P09372 | dnak_e_coli   | grpe_e_coli |
| P09372 | GRPE_ECOLI | * | P76556 | P09372 | eutp_e_coli   | grpe_e_coli |
| P09372 | GRPE_ECOLI | * | P28630 | P09372 | hola_e_coli   | grpe_e_coli |
| P09372 | GRPE_ECOLI | * | P0A705 | P09372 | if2_e_coli    | grpe_e_coli |
| P09372 | GRPE_ECOLI | * | P31473 | P09372 | rava_e_coli   | grpe_e_coli |
| P09372 | GRPE_ECOLI | * | P33644 | P09372 | yfih_e_coli   | grpe_e_coli |
| P23893 | GSA_ECOLI  |   | none   |        |               |             |
| P0A6W9 | GSH1_ECOLI | * | P0AF90 | P0A6W9 | yjgd_e_coli   | gsh1_e_coli |
| P06715 | GSHR_ECOLI | * | P65870 | P06715 | qued_e_coli   | gshr_e_coli |
| P06715 | GSHR_ECOLI | * | P64540 | P06715 | yfcl_e_coli   | gshr_e_coli |
| P45759 | GSPE_ECOLI |   | none   |        |               |             |
| P0A9D2 | GST_ECOLI  | * | P0AFI7 | P0A9D2 | pdxh_e_coli   | gst_e_coli  |
| P04079 | GUAA_ECOLI | * | P26612 | P04079 | amy2_e_coli   | guaa_e_coli |
| P04079 | GUAA_ECOLI | * | P66817 | P04079 | diaa_e_coli   | guaa_e_coli |

|        |            |   |        |        |            |            |
|--------|------------|---|--------|--------|------------|------------|
| P04079 | GUAA_ECOLI | * | P23843 | P04079 | oppa_ecoli | guaa_ecoli |
| P04079 | GUAA_ECOLI | * | P06992 | P04079 | rsma_ecoli | guaa_ecoli |
| P04079 | GUAA_ECOLI | * | P75745 | P04079 | ybgk_ecoli | guaa_ecoli |
| P04079 | GUAA_ECOLI | * | P76419 | P04079 | yegv_ecoli | guaa_ecoli |
| POAES4 | GYRA_ECOLI | * | P24177 | POAES4 | acrd_ecoli | gyra_ecoli |
| POAES4 | GYRA_ECOLI | * | P0A6G7 | POAES4 | clpp_ecoli | gyra_ecoli |
| POAES4 | GYRA_ECOLI | * | P0A6Y8 | POAES4 | dnak_ecoli | gyra_ecoli |
| POAES4 | GYRA_ECOLI | * | P13024 | POAES4 | fdhe_ecoli | gyra_ecoli |
| POAES4 | GYRA_ECOLI | * | P26608 | POAES4 | flis_ecoli | gyra_ecoli |
| POAES4 | GYRA_ECOLI | * | P0AES4 | POAES4 | gyra_ecoli | gyra_ecoli |
| POAES4 | GYRA_ECOLI | * | P0AES6 | POAES4 | gyrb_ecoli | gyra_ecoli |
| POAES4 | GYRA_ECOLI | * | P0AES6 | POAES4 | gyrb_ecoli | gyra_ecoli |
| POAES4 | GYRA_ECOLI | * | P0AES6 | POAES4 | gyrb_ecoli | gyra_ecoli |
| POAES4 | GYRA_ECOLI | * | P77319 | POAES4 | hscg_ecoli | gyra_ecoli |
| POAES4 | GYRA_ECOLI | * | P0A715 | POAES4 | kdsa_ecoli | gyra_ecoli |
| POAES4 | GYRA_ECOLI | * | P77432 | POAES4 | lsrk_ecoli | gyra_ecoli |
| POAES4 | GYRA_ECOLI | * | P0AF03 | POAES4 | mog_ecoli  | gyra_ecoli |
| POAES4 | GYRA_ECOLI | * | P0A9X4 | POAES4 | mreb_ecoli | gyra_ecoli |
| POAES4 | GYRA_ECOLI | * | P24205 | POAES4 | msbb_ecoli | gyra_ecoli |
| POAES4 | GYRA_ECOLI | * | P0AFI2 | POAES4 | parc_ecoli | gyra_ecoli |
| POAES4 | GYRA_ECOLI | * | P0A7Q6 | POAES4 | rl36_ecoli | gyra_ecoli |
| POAES4 | GYRA_ECOLI | * | P0A7W1 | POAES4 | rs5_ecoli  | gyra_ecoli |
| POAES4 | GYRA_ECOLI | * | P28043 | POAES4 | ssb2_ecolx | gyra_ecoli |
| POAES4 | GYRA_ECOLI | * | P0A832 | POAES4 | ssrp_ecoli | gyra_ecoli |
| POAES4 | GYRA_ECOLI | * | P0A8H8 | POAES4 | yacg_ecoli | gyra_ecoli |
| POAES4 | GYRA_ECOLI | * | P0A8H8 | POAES4 | yacg_ecoli | gyra_ecoli |
| POAES4 | GYRA_ECOLI | * | P38036 | POAES4 | ygcb_ecoli | gyra_ecoli |
| POAES4 | GYRA_ECOLI | * | P39279 | POAES4 | yjej_ecoli | gyra_ecoli |
| POAES6 | GYRB_ECOLI | * | P0AES4 | POAES6 | gyra_ecoli | gyrb_ecoli |
| POAES6 | GYRB_ECOLI | * | P0AES4 | POAES6 | gyra_ecoli | gyrb_ecoli |
| POAES6 | GYRB_ECOLI | * | P30750 | POAES6 | metn_ecoli | gyrb_ecoli |
| POAES6 | GYRB_ECOLI | * | P30745 | POAES6 | moaa_ecoli | gyrb_ecoli |
| POAES6 | GYRB_ECOLI | * | P0A7I4 | POAES6 | rf3_ecoli  | gyrb_ecoli |
| POAES6 | GYRB_ECOLI | * | P36979 | POAES6 | rlmn_ecoli | gyrb_ecoli |
| POAES6 | GYRB_ECOLI | * | P0A7W1 | POAES6 | rs5_ecoli  | gyrb_ecoli |
| POAES6 | GYRB_ECOLI | * | P0A832 | POAES6 | ssrp_ecoli | gyrb_ecoli |
| POAES6 | GYRB_ECOLI | * | P0A8H8 | POAES6 | yacg_ecoli | gyrb_ecoli |
| POAES6 | GYRB_ECOLI | * | P0A8H8 | POAES6 | yacg_ecoli | gyrb_ecoli |
| P33012 | GYRI_ECOLI |   | none   |        |            |            |
| P31658 | HCHA_ECOLI | * | P0ACI6 | P31658 | asnc_ecoli | hcha_ecoli |
| P31658 | HCHA_ECOLI | * | P17446 | P31658 | beti_ecoli | hcha_ecoli |

|        |            |      |        |        |             |            |
|--------|------------|------|--------|--------|-------------|------------|
| P31658 | HCHA_ECOLI | *    | P36561 | P31658 | cobs_ecoli  | hcha_ecoli |
| P31658 | HCHA_ECOLI | *    | P36995 | P31658 | cspb_ecoli  | hcha_ecoli |
| P31658 | HCHA_ECOLI | *    | P0A972 | P31658 | cspe_ecoli  | hcha_ecoli |
| P31658 | HCHA_ECOLI | *    | P0A978 | P31658 | cspg_ecoli  | hcha_ecoli |
| P31658 | HCHA_ECOLI | *    | P0A986 | P31658 | cspi_ecoli  | hcha_ecoli |
| P31658 | HCHA_ECOLI | *    | P21156 | P31658 | cysd_ecoli  | hcha_ecoli |
| P31658 | HCHA_ECOLI | *    | P19636 | P31658 | eutc_ecoli  | hcha_ecoli |
| P31658 | HCHA_ECOLI | *    | P0A953 | P31658 | fabb_ecoli  | hcha_ecoli |
| P31658 | HCHA_ECOLI | *    | P0A9R7 | P31658 | ftse_ecoli  | hcha_ecoli |
| P31658 | HCHA_ECOLI | *    | P23871 | P31658 | hemh_ecoli  | hcha_ecoli |
| P31658 | HCHA_ECOLI | *    | P16433 | P31658 | hycg_ecoli  | hcha_ecoli |
| P31658 | HCHA_ECOLI | *    | P0A9S7 | P31658 | livg_ecoli  | hcha_ecoli |
| P31658 | HCHA_ECOLI | *    | P76114 | P31658 | mabr_ecoli  | hcha_ecoli |
| P31658 | HCHA_ECOLI | *    | P0ACR9 | P31658 | mpa_ecoli   | hcha_ecoli |
| P31658 | HCHA_ECOLI | *    | P31802 | P31658 | narp_ecoli  | hcha_ecoli |
| P31658 | HCHA_ECOLI | *    | P0AFI0 | P31658 | oxc_ecoli   | hcha_ecoli |
| P31658 | HCHA_ECOLI | *    | P18133 | P31658 | pncb_ecoli  | hcha_ecoli |
| P31658 | HCHA_ECOLI | *    | P55799 | P31658 | prp2_ecoli  | hcha_ecoli |
| P31658 | HCHA_ECOLI | *    | P0A7E5 | P31658 | pyrg_ecoli  | hcha_ecoli |
| P31658 | HCHA_ECOLI | *    | P15033 | P31658 | racc_ecoli  | hcha_ecoli |
| P31658 | HCHA_ECOLI | *    | P0AFX4 | P31658 | rsd_ecoli   | hcha_ecoli |
| P31658 | HCHA_ECOLI | *    | P52108 | P31658 | rsta_ecoli  | hcha_ecoli |
| P31658 | HCHA_ECOLI | *    | P05707 | P31658 | srlc_ecoli  | hcha_ecoli |
| P31658 | HCHA_ECOLI | *    | P0ACT6 | P31658 | uidr_ecoli  | hcha_ecoli |
| P31658 | HCHA_ECOLI | *    | P76204 | P31658 | ydiv_ecoli  | hcha_ecoli |
| P31658 | HCHA_ECOLI | *    | P0A959 | P31658 | yfbq_ecoli  | hcha_ecoli |
| P31658 | HCHA_ECOLI | *    | P52126 | P31658 | yfjk_ecoli  | hcha_ecoli |
| P75824 | HCR_ECOLI  | none |        |        |             |            |
| POAES9 | HDEA_ECOLI | none |        |        |             |            |
| POAET2 | HDEB_ECOLI | none |        |        |             |            |
| POA8R9 | HDFR_ECOLI | none |        |        |             |            |
| POAET8 | HDHA_ECOLI | *    | P52076 | POAET8 | qseb_ecoli  | hdha_ecoli |
| POAET8 | HDHA_ECOLI | *    | P16525 | POAET8 | tus_ecoli   | hdha_ecoli |
| P15038 | HELD_ECOLI | *    | P0ABJ1 | P15038 | cyoa_ecoli  | held_ecoli |
| P15038 | HELD_ECOLI | *    | P0A6J8 | P15038 | ddla_ecoli  | held_ecoli |
| P15038 | HELD_ECOLI | *    | P10443 | P15038 | dpo3a_ecoli | held_ecoli |
| P15038 | HELD_ECOLI | *    | P75780 | P15038 | fiu_ecoli   | held_ecoli |
| P15038 | HELD_ECOLI | *    | P61949 | P15038 | flav_ecoli  | held_ecoli |
| P15038 | HELD_ECOLI | *    | P06987 | P15038 | his7_ecoli  | held_ecoli |

|        |            |          |        |            |            |
|--------|------------|----------|--------|------------|------------|
| P15038 | HELD_ECOLI | * P77319 | P15038 | hscg_ecoli | held_ecoli |
| P15038 | HELD_ECOLI | * P0ABR9 | P15038 | mhpb_ecoli | held_ecoli |
| P15038 | HELD_ECOLI | * P37095 | P15038 | pepb_ecoli | held_ecoli |
| P15038 | HELD_ECOLI | * P0AFW4 | P15038 | rnk_ecoli  | held_ecoli |
| P15038 | HELD_ECOLI | * P00961 | P15038 | sygb_ecoli | held_ecoli |
| P15038 | HELD_ECOLI | * P31443 | P15038 | yidf_ecoli | held_ecoli |
| P0ACB2 | HEM2_ECOLI | * P10121 | P0ACB2 | ftsy_ecoli | hem2_ecoli |
| P0ACB2 | HEM2_ECOLI | * P41409 | P0ACB2 | riha_ecoli | hem2_ecoli |
| P0ABC3 | HFLC_ECOLI | * P0AAI3 | P0ABC3 | ftsh_ecoli | hflc_ecoli |
| P0ABC3 | HFLC_ECOLI | * A8A6G7 | P0ABC3 | oxaa_ecohs | hflc_ecoli |
| P0ABC3 | HFLC_ECOLI | * P05459 | P0ABC3 | pdxb_ecoli | hflc_ecoli |
| P0ABC3 | HFLC_ECOLI | * P21437 | P0ABC3 | yggf_ecoli | hflc_ecoli |
| P0ABC7 | HFLK_ECOLI | * P0A964 | P0ABC7 | chew_ecoli | hflk_ecoli |
| P0ABC7 | HFLK_ECOLI | * P0ABJ1 | P0ABC7 | cyoa_ecoli | hflk_ecoli |
| P0ABC7 | HFLK_ECOLI | * P0AEL6 | P0ABC7 | fepb_ecoli | hflk_ecoli |
| P0ABC7 | HFLK_ECOLI | * P34749 | P0ABC7 | hofq_ecoli | hflk_ecoli |
| P0ABC7 | HFLK_ECOLI | * P0AFG3 | P0ABC7 | odo1_ecoli | hflk_ecoli |
| P0ABC7 | HFLK_ECOLI | * A8A6G7 | P0ABC7 | oxaa_ecohs | hflk_ecoli |
| P0ABC7 | HFLK_ECOLI | * P23869 | P0ABC7 | ppib_ecoli | hflk_ecoli |
| P0ABC7 | HFLK_ECOLI | * P37903 | P0ABC7 | uspf_ecoli | hflk_ecoli |
| P0ABC7 | HFLK_ECOLI | * P0AD05 | P0ABC7 | yeca_ecoli | hflk_ecoli |
| P25519 | HFLX_ECOLI | none     |        |            |            |
| P0A6X3 | HFQ_ECOLI  | * P19926 | P0A6X3 | agp_ecoli  | hfq_ecoli  |
| P0A6X3 | HFQ_ECOLI  | * P0A9X9 | P0A6X3 | cspa_ecoli | hfq_ecoli  |
| P0A6X3 | HFQ_ECOLI  | * P36995 | P0A6X3 | cspb_ecoli | hfq_ecoli  |
| P0A6X3 | HFQ_ECOLI  | * P0A9Y6 | P0A6X3 | cspc_ecoli | hfq_ecoli  |
| P0A6X3 | HFQ_ECOLI  | * P0A972 | P0A6X3 | cspe_ecoli | hfq_ecoli  |
| P0A6X3 | HFQ_ECOLI  | * P0ABT2 | P0A6X3 | dps_ecoli  | hfq_ecoli  |
| P0A6X3 | HFQ_ECOLI  | * P0AEH5 | P0A6X3 | elab_ecoli | hfq_ecoli  |
| P0A6X3 | HFQ_ECOLI  | * P26608 | P0A6X3 | flis_ecoli | hfq_ecoli  |
| P0A6X3 | HFQ_ECOLI  | * P0A722 | P0A6X3 | lpxa_ecoli | hfq_ecoli  |
| P0A6X3 | HFQ_ECOLI  | * P0A799 | P0A6X3 | pgk_ecoli  | hfq_ecoli  |
| P0A6X3 | HFQ_ECOLI  | * P30235 | P0A6X3 | psuk_ecoli | hfq_ecoli  |
| P0A6X3 | HFQ_ECOLI  | * P21513 | P0A6X3 | rne_ecoli  | hfq_ecoli  |
| P0A6X3 | HFQ_ECOLI  | * P06612 | P0A6X3 | top1_ecoli | hfq_ecoli  |
| P0A6X3 | HFQ_ECOLI  | * P0A8E5 | P0A6X3 | yacl_ecoli | hfq_ecoli  |
| P0A6X3 | HFQ_ECOLI  | * P0AD07 | P0A6X3 | yecf_ecoli | hfq_ecoli  |
| P0A6X3 | HFQ_ECOLI  | * P0AF76 | P0A6X3 | yjfi_ecoli | hfq_ecoli  |
| P0A6X3 | HFQ_ECOLI  | * P76280 | P0A6X3 | yobb_ecoli | hfq_ecoli  |



|        |             |          |        |            |            |
|--------|-------------|----------|--------|------------|------------|
| P0ACE7 | HINT_ECOLI  | * P36979 | P0ACE7 | rlmn_ecoli | hint_ecoli |
| P60757 | HIS1_ECOLI  | * P75931 | P60757 | mvim_ecoli | his1_ecoli |
| P10371 | HIS4_ECOLI  | * P00903 | P10371 | paba_ecoli | his4_ecoli |
| P06987 | HIS7_ECOLI  | * P0A850 | P06987 | tig_ecoli  | his7_ecoli |
| P06986 | HIS8_ECOLI  | * P0A6Y8 | P06986 | dnak_ecoli | his8_ecoli |
| P67910 | HLDD_ECOLI  | * P33224 | P67910 | aidb_ecoli | hldd_ecoli |
| P67910 | HLDD_ECOLI  | * P0A6F9 | P67910 | ch10_ecoli | hldd_ecoli |
| P67910 | HLDD_ECOLI  | * P0A6F9 | P67910 | ch10_ecoli | hldd_ecoli |
| P67910 | HLDD_ECOLI  | * P0A6G7 | P67910 | clpp_ecoli | hldd_ecoli |
| P67910 | HLDD_ECOLI  | * P0A6G7 | P67910 | clpp_ecoli | hldd_ecoli |
| P67910 | HLDD_ECOLI  | * P00393 | P67910 | dhna_ecoli | hldd_ecoli |
| P67910 | HLDD_ECOLI  | * P0ABT2 | P67910 | dps_ecoli  | hldd_ecoli |
| P67910 | HLDD_ECOLI  | * P0ABT2 | P67910 | dps_ecoli  | hldd_ecoli |
| P67910 | HLDD_ECOLI  | * P76503 | P67910 | fadi_ecoli | hldd_ecoli |
| P67910 | HLDD_ECOLI  | * P0ACP1 | P67910 | frur_ecoli | hldd_ecoli |
| P67910 | HLDD_ECOLI  | * P0A9R7 | P67910 | ftse_ecoli | hldd_ecoli |
| P67910 | HLDD_ECOLI  | * P0CI31 | P67910 | hcab_ecoli | hldd_ecoli |
| P67910 | HLDD_ECOLI  | * P16528 | P67910 | iclr_ecoli | hldd_ecoli |
| P67910 | HLDD_ECOLI  | * P0A7A9 | P67910 | ipyr_ecoli | hldd_ecoli |
| P67910 | HLDD_ECOLI  | * P62617 | P67910 | ispf_ecoli | hldd_ecoli |
| P67910 | HLDD_ECOLI  | * P0A715 | P67910 | kdsa_ecoli | hldd_ecoli |
| P67910 | HLDD_ECOLI  | * P33232 | P67910 | lidd_ecoli | hldd_ecoli |
| P67910 | HLDD_ECOLI  | * P21645 | P67910 | lpxd_ecoli | hldd_ecoli |
| P67910 | HLDD_ECOLI  | * P0ABU0 | P67910 | menb_ecoli | hldd_ecoli |
| P67910 | HLDD_ECOLI  | * P0ABU0 | P67910 | menb_ecoli | hldd_ecoli |
| P67910 | HLDD_ECOLI  | * P09152 | P67910 | narg_ecoli | hldd_ecoli |
| P67910 | HLDD_ECOLI  | * P61714 | P67910 | risb_ecoli | hldd_ecoli |
| P67910 | HLDD_ECOLI  | * P61714 | P67910 | risb_ecoli | hldd_ecoli |
| P67910 | HLDD_ECOLI  | * P0CG19 | P67910 | rnph_ecoli | hldd_ecoli |
| P67910 | HLDD_ECOLI  | * P25534 | P67910 | ubih_ecoli | hldd_ecoli |
| P67910 | HLDD_ECOLI  | * P39177 | P67910 | uspg_ecoli | hldd_ecoli |
| P67910 | HLDD_ECOLI  | * P0A8C1 | P67910 | ybjq_ecoli | hldd_ecoli |
| P67910 | HLDD_ECOLI  | * P75829 | P67910 | ybjx_ecoli | hldd_ecoli |
| P67910 | HLDD_ECOLI  | * P64476 | P67910 | ydiH_ecoli | hldd_ecoli |
| P76658 | HLDE_ECOLI  | none     |        |            |            |
| P08715 | HLYAP_ECOLX | none     |        |            |            |
| P0ACF8 | HNS_ECOLI   | * P0AE60 | P0ACF8 | ceda_ecoli | hns_ecoli  |

|        |           |   |        |        |                            |                           |
|--------|-----------|---|--------|--------|----------------------------|---------------------------|
| POACF8 | HNS_ECOLI | * | P0A9Y6 | POACF8 | <a href="#">cspc_ecoli</a> | <a href="#">hns_ecoli</a> |
| POACF8 | HNS_ECOLI | * | P0ACF4 | POACF8 | <a href="#">dbhb_ecoli</a> | <a href="#">hns_ecoli</a> |
| POACF8 | HNS_ECOLI | * | P00582 | POACF8 | <a href="#">dpo1_ecoli</a> | <a href="#">hns_ecoli</a> |
| POACF8 | HNS_ECOLI | * | P61949 | POACF8 | <a href="#">flav_ecoli</a> | <a href="#">hns_ecoli</a> |
| POACF8 | HNS_ECOLI | * | P0ABS8 | POACF8 | <a href="#">hole_ecoli</a> | <a href="#">hns_ecoli</a> |
| POACF8 | HNS_ECOLI | * | P68739 | POACF8 | <a href="#">nfi_ecoli</a>  | <a href="#">hns_ecoli</a> |
| POACF8 | HNS_ECOLI | * | P42641 | POACF8 | <a href="#">obg_ecoli</a>  | <a href="#">hns_ecoli</a> |
| POACF8 | HNS_ECOLI | * | P77181 | POACF8 | <a href="#">paay_ecoli</a> | <a href="#">hns_ecoli</a> |
| POACF8 | HNS_ECOLI | * | P29745 | POACF8 | <a href="#">pept_ecoli</a> | <a href="#">hns_ecoli</a> |
| POACF8 | HNS_ECOLI | * | P07013 | POACF8 | <a href="#">prib_ecoli</a> | <a href="#">hns_ecoli</a> |
| POACF8 | HNS_ECOLI | * | P0A7E9 | POACF8 | <a href="#">pyrh_ecoli</a> | <a href="#">hns_ecoli</a> |
| POACF8 | HNS_ECOLI | * | P0A7S3 | POACF8 | <a href="#">rs12_ecoli</a> | <a href="#">hns_ecoli</a> |
| POACF8 | HNS_ECOLI | * | P0A8I1 | POACF8 | <a href="#">ruvx_ecoli</a> | <a href="#">hns_ecoli</a> |
| POACF8 | HNS_ECOLI | * | P27253 | POACF8 | <a href="#">sbm_ecoli</a>  | <a href="#">hns_ecoli</a> |
| POACF8 | HNS_ECOLI | * | P06612 | POACF8 | <a href="#">top1_ecoli</a> | <a href="#">hns_ecoli</a> |
| POACF8 | HNS_ECOLI | * | P33225 | POACF8 | <a href="#">tora_ecoli</a> | <a href="#">hns_ecoli</a> |
| POACF8 | HNS_ECOLI | * | P0A8F8 | POACF8 | <a href="#">uvrb_ecoli</a> | <a href="#">hns_ecoli</a> |
| POACF8 | HNS_ECOLI | * | P03018 | POACF8 | <a href="#">uvrd_ecoli</a> | <a href="#">hns_ecoli</a> |
| POACF8 | HNS_ECOLI | * | P0AB28 | POACF8 | <a href="#">yced_ecoli</a> | <a href="#">hns_ecoli</a> |
| POACF8 | HNS_ECOLI | * | P37052 | POACF8 | <a href="#">ychj_ecoli</a> | <a href="#">hns_ecoli</a> |
| POACF8 | HNS_ECOLI | * | P77721 | POACF8 | <a href="#">ydjf_ecoli</a> | <a href="#">hns_ecoli</a> |
| POACF8 | HNS_ECOLI | * | P0A8A2 | POACF8 | <a href="#">yeen_ecoli</a> | <a href="#">hns_ecoli</a> |
| POACF8 | HNS_ECOLI | * | P0AD21 | POACF8 | <a href="#">yejg_ecoli</a> | <a href="#">hns_ecoli</a> |
| POACF8 | HNS_ECOLI | * | P09996 | POACF8 | <a href="#">yidb_ecoli</a> | <a href="#">hns_ecoli</a> |
| POACF8 | HNS_ECOLI | * | P32162 | POACF8 | <a href="#">yiis_ecoli</a> | <a href="#">hns_ecoli</a> |
| POACF8 | HNS_ECOLI | * | P65367 | POACF8 | <a href="#">yqca_ecoli</a> | <a href="#">hns_ecoli</a> |

|        |            |      |
|--------|------------|------|
| Q57160 | HPAB_ECOLX | none |
| Q46978 | HPAG_ECOLX | none |
| P37352 | HPCE_ECOLX | none |
| Q47098 | HPCH_ECOLX | none |
| P0A9M2 | HPRT_ECOLI | none |

|        |            |   |        |        |                            |                            |
|--------|------------|---|--------|--------|----------------------------|----------------------------|
| P43329 | HRPA_ECOLI | * | P0A9Y6 | P43329 | <a href="#">cspc_ecoli</a> | <a href="#">hrpa_ecoli</a> |
| P43329 | HRPA_ECOLI | * | P0A972 | P43329 | <a href="#">cspe_ecoli</a> | <a href="#">hrpa_ecoli</a> |
| P43329 | HRPA_ECOLI | * | P0A9P6 | P43329 | <a href="#">dead_ecoli</a> | <a href="#">hrpa_ecoli</a> |
| P43329 | HRPA_ECOLI | * | P00582 | P43329 | <a href="#">dpo1_ecoli</a> | <a href="#">hrpa_ecoli</a> |
| P43329 | HRPA_ECOLI | * | P0ABT2 | P43329 | <a href="#">dps_ecoli</a>  | <a href="#">hrpa_ecoli</a> |
| P43329 | HRPA_ECOLI | * | P0A6X3 | P43329 | <a href="#">hfq_ecoli</a>  | <a href="#">hrpa_ecoli</a> |
| P43329 | HRPA_ECOLI | * | P76558 | P43329 | <a href="#">mao2_ecoli</a> | <a href="#">hrpa_ecoli</a> |
| P43329 | HRPA_ECOLI | * | P36979 | P43329 | <a href="#">rlmn_ecoli</a> | <a href="#">hrpa_ecoli</a> |

|        |            |          |        |             |             |
|--------|------------|----------|--------|-------------|-------------|
| P43329 | HRPA_ECOLI | * P37765 | P43329 | rlub_ecoli  | hrpa_ecoli  |
| P43329 | HRPA_ECOLI | * P37765 | P43329 | rlub_ecoli  | hrpa_ecoli  |
| P43329 | HRPA_ECOLI | * P0AA39 | P43329 | rluc_ecoli  | hrpa_ecoli  |
| P43329 | HRPA_ECOLI | * P0AG24 | P43329 | spot_ecoli  | hrpa_ecoli  |
| P43329 | HRPA_ECOLI | * P0A8I5 | P43329 | trmb_ecoli  | hrpa_ecoli  |
| P0A6Z1 | HSCA_ECOLI | * P36659 | P0A6Z1 | cbpa_ecoli  | hsc_a_ecoli |
| P0A6Z1 | HSCA_ECOLI | * P0A6Y8 | P0A6Z1 | dnak_ecoli  | hsc_a_ecoli |
| P0A6Z1 | HSCA_ECOLI | * P0ACD4 | P0A6Z1 | nifu_ecoli  | hsc_a_ecoli |
| P0A6Z1 | HSCA_ECOLI | * P0ACD4 | P0A6Z1 | nifu_ecoli  | hsc_a_ecoli |
| P0A6Z1 | HSCA_ECOLI | * P77509 | P0A6Z1 | yphe_ecoli  | hsc_a_ecoli |
| P0A6Y5 | HSLO_ECOLI | none     |        |             |             |
| P0ACG8 | HSLR_ECOLI | * P77319 | P0ACG8 | hsc_c_ecoli | hsl_r_ecoli |
| P0A6H5 | HSLU_ECOLI | * P0ABJ1 | P0A6H5 | cyoa_ecoli  | hsl_u_ecoli |
| P0A6H5 | HSLU_ECOLI | * P0A6H5 | P0A6H5 | hsl_u_ecoli | hsl_u_ecoli |
| P0A6H5 | HSLU_ECOLI | * P0A7B8 | P0A6H5 | hsl_v_ecoli | hsl_u_ecoli |
| P0A6H5 | HSLU_ECOLI | * P26648 | P0A6H5 | sufi_ecoli  | hsl_u_ecoli |
| P0A6H5 | HSLU_ECOLI | * P0AA25 | P0A6H5 | thio_ecoli  | hsl_u_ecoli |
| P0A6H5 | HSLU_ECOLI | * P0AA25 | P0A6H5 | thio_ecoli  | hsl_u_ecoli |
| P0A6H5 | HSLU_ECOLI | * P77721 | P0A6H5 | ydj_f_ecoli | hsl_u_ecoli |
| P0A7B8 | HSLV_ECOLI | * P0A6H5 | P0A7B8 | hsl_u_ecoli | hsl_v_ecoli |
| P0A7B8 | HSLV_ECOLI | * P0A6H5 | P0A7B8 | hsl_u_ecoli | hsl_v_ecoli |
| P0A7B8 | HSLV_ECOLI | * P0A6H5 | P0A7B8 | hsl_u_ecoli | hsl_v_ecoli |
| P0A7B8 | HSLV_ECOLI | * P0A6H5 | P0A7B8 | hsl_u_ecoli | hsl_v_ecoli |
| P0A7B8 | HSLV_ECOLI | * P0A6H5 | P0A7B8 | hsl_u_ecoli | hsl_v_ecoli |
| P0A7B8 | HSLV_ECOLI | * P0A6H5 | P0A7B8 | hsl_u_ecoli | hsl_v_ecoli |
| P0A7B8 | HSLV_ECOLI | * P0A7B8 | P0A7B8 | hsl_v_ecoli | hsl_v_ecoli |
| P0A6Z3 | HTPG_ECOLI | * P42907 | P0A6Z3 | agas_ecoli  | htpg_ecoli  |
| P0A6Z3 | HTPG_ECOLI | * P05637 | P0A6Z3 | apah_ecoli  | htpg_ecoli  |
| P0A6Z3 | HTPG_ECOLI | * P0A6F9 | P0A6Z3 | ch10_ecoli  | htpg_ecoli  |
| P0A6Z3 | HTPG_ECOLI | * P0A8Q6 | P0A6Z3 | clps_ecoli  | htpg_ecoli  |
| P0A6Z3 | HTPG_ECOLI | * P0ABJ1 | P0A6Z3 | cyoa_ecoli  | htpg_ecoli  |
| P0A6Z3 | HTPG_ECOLI | * P0ACF4 | P0A6Z3 | dbh_b_ecoli | htpg_ecoli  |
| P0A6Z3 | HTPG_ECOLI | * P0AEE8 | P0A6Z3 | dma_ecoli   | htpg_ecoli  |
| P0A6Z3 | HTPG_ECOLI | * P0A6Y8 | P0A6Z3 | dnak_ecoli  | htpg_ecoli  |
| P0A6Z3 | HTPG_ECOLI | * P10805 | P0A6Z3 | envy_ecoli  | htpg_ecoli  |
| P0A6Z3 | HTPG_ECOLI | * P04993 | P0A6Z3 | ex5a_ecoli  | htpg_ecoli  |
| P0A6Z3 | HTPG_ECOLI | * P68688 | P0A6Z3 | glrx1_ecoli | htpg_ecoli  |
| P0A6Z3 | HTPG_ECOLI | * P31450 | P0A6Z3 | glv_g_ecoli | htpg_ecoli  |
| P0A6Z3 | HTPG_ECOLI | * P23871 | P0A6Z3 | hemh_ecoli  | htpg_ecoli  |

|        |            |   |        |        |            |            |
|--------|------------|---|--------|--------|------------|------------|
| POA6Z3 | HTPG_ECOLI | * | P0A6L9 | P0A6Z3 | hscb_ecoli | htpg_ecoli |
| POA6Z3 | HTPG_ECOLI | * | P77329 | P0A6Z3 | hyfg_ecoli | htpg_ecoli |
| POA6Z3 | HTPG_ECOLI | * | P69441 | P0A6Z3 | kad_ecoli  | htpg_ecoli |
| POA6Z3 | HTPG_ECOLI | * | P09151 | P0A6Z3 | leu1_ecoli | htpg_ecoli |
| POA6Z3 | HTPG_ECOLI | * | P22731 | P0A6Z3 | livf_ecoli | htpg_ecoli |
| POA6Z3 | HTPG_ECOLI | * | P0A9I5 | P0A6Z3 | napd_ecoli | htpg_ecoli |
| POA6Z3 | HTPG_ECOLI | * | P27896 | P0A6Z3 | narq_ecoli | htpg_ecoli |
| POA6Z3 | HTPG_ECOLI | * | P76577 | P0A6Z3 | pbpc_ecoli | htpg_ecoli |
| POA6Z3 | HTPG_ECOLI | * | P69411 | P0A6Z3 | rscf_ecoli | htpg_ecoli |
| POA6Z3 | HTPG_ECOLI | * | P37692 | P0A6Z3 | rfaf_ecoli | htpg_ecoli |
| POA6Z3 | HTPG_ECOLI | * | P30850 | P0A6Z3 | rnb_ecoli  | htpg_ecoli |
| POA6Z3 | HTPG_ECOLI | * | P0A8T7 | P0A6Z3 | rpoc_ecoli | htpg_ecoli |
| POA6Z3 | HTPG_ECOLI | * | P0A7V0 | P0A6Z3 | rs2_ecoli  | htpg_ecoli |
| POA6Z3 | HTPG_ECOLI | * | P0AFZ3 | P0A6Z3 | sspb_ecoli | htpg_ecoli |
| POA6Z3 | HTPG_ECOLI | * | P0ACG1 | P0A6Z3 | stpa_ecoli | htpg_ecoli |
| POA6Z3 | HTPG_ECOLI | * | P0AA25 | P0A6Z3 | thio_ecoli | htpg_ecoli |
| POA6Z3 | HTPG_ECOLI | * | P0AA25 | P0A6Z3 | thio_ecoli | htpg_ecoli |
| POA6Z3 | HTPG_ECOLI | * | P0A850 | P0A6Z3 | tig_ecoli  | htpg_ecoli |
| POA6Z3 | HTPG_ECOLI | * | P00895 | P0A6Z3 | trpe_ecoli | htpg_ecoli |
| POA6Z3 | HTPG_ECOLI | * | P07024 | P0A6Z3 | usha_ecoli | htpg_ecoli |
| POA6Z3 | HTPG_ECOLI | * | P75682 | P0A6Z3 | yage_ecoli | htpg_ecoli |
| POA6Z3 | HTPG_ECOLI | * | P77169 | P0A6Z3 | yagj_ecoli | htpg_ecoli |
| POA6Z3 | HTPG_ECOLI | * | P77324 | P0A6Z3 | yags_ecoli | htpg_ecoli |
| POA6Z3 | HTPG_ECOLI | * | P77806 | P0A6Z3 | ybdl_ecoli | htpg_ecoli |
| POA6Z3 | HTPG_ECOLI | * | P75767 | P0A6Z3 | ybhk_ecoli | htpg_ecoli |
| POA6Z3 | HTPG_ECOLI | * | P0AAX8 | P0A6Z3 | ybis_ecoli | htpg_ecoli |
| POA6Z3 | HTPG_ECOLI | * | P0AB06 | P0A6Z3 | ycbk_ecoli | htpg_ecoli |
| POA6Z3 | HTPG_ECOLI | * | P0AB24 | P0A6Z3 | ycdo_ecoli | htpg_ecoli |
| POA6Z3 | HTPG_ECOLI | * | P0ACX5 | P0A6Z3 | ydhz_ecoli | htpg_ecoli |
| POA6Z3 | HTPG_ECOLI | * | P76270 | P0A6Z3 | yebr_ecoli | htpg_ecoli |
| POA6Z3 | HTPG_ECOLI | * | P64524 | P0A6Z3 | yeev_ecoli | htpg_ecoli |
| POA6Z3 | HTPG_ECOLI | * | P76594 | P0A6Z3 | yfiq_ecoli | htpg_ecoli |
| POA6Z3 | HTPG_ECOLI | * | Q46901 | P0A6Z3 | ygcl_ecoli | htpg_ecoli |
| POA6Z3 | HTPG_ECOLI | * | Q46802 | P0A6Z3 | ygev_ecoli | htpg_ecoli |
| POA6Z3 | HTPG_ECOLI | * | P11290 | P0A6Z3 | yibd_ecoli | htpg_ecoli |
| POA6Z3 | HTPG_ECOLI | * | P76257 | P0A6Z3 | yoaa_ecoli | htpg_ecoli |
| POA6Z3 | HTPG_ECOLI | * | Q46808 | P0A6Z3 | yqeb_ecoli | htpg_ecoli |
| P37180 | HYBB_ECOLI |   | none   |        |            |            |
| P37182 | HYBD_ECOLI | * | P0AGJ5 | P37182 | yfif_ecoli | hybd_ecoli |
| POAEV4 | HYCA_ECOLI |   | none   |        |            |            |
| POAAK1 | HYCB_ECOLI |   | none   |        |            |            |

|        |            |          |        |            |            |  |
|--------|------------|----------|--------|------------|------------|--|
| P77423 | HYFH_ECOLI | none     |        |            |            |  |
| P30131 | HYPF_ECOLI | none     |        |            |            |  |
| P39377 | IADA_ECOLI | none     |        |            |            |  |
| P16528 | ICLR_ECOLI | none     |        |            |            |  |
| P08200 | IDH_ECOLI  | * P0AA25 | P08200 | thio_ecoli | idh_ecoli  |  |
| P08200 | IDH_ECOLI  | * P0AA25 | P08200 | thio_ecoli | idh_ecoli  |  |
| P69222 | IF1_ECOLI  | * P0A8P1 | P69222 | lftr_ecoli | if1_ecoli  |  |
| P0A705 | IF2_ECOLI  | * P0ABD5 | P0A705 | acca_ecoli | if2_ecoli  |  |
| P0A705 | IF2_ECOLI  | * P63284 | P0A705 | clpb_ecoli | if2_ecoli  |  |
| P0A705 | IF2_ECOLI  | * P36995 | P0A705 | cspb_ecoli | if2_ecoli  |  |
| P0A705 | IF2_ECOLI  | * P08622 | P0A705 | dnaj_ecoli | if2_ecoli  |  |
| P0A705 | IF2_ECOLI  | * P0ADI4 | P0A705 | entb_ecoli | if2_ecoli  |  |
| P0A705 | IF2_ECOLI  | * P0AEM6 | P0A705 | flia_ecoli | if2_ecoli  |  |
| P0A705 | IF2_ECOLI  | * P15038 | P0A705 | held_ecoli | if2_ecoli  |  |
| P0A705 | IF2_ECOLI  | * P28630 | P0A705 | hola_ecoli | if2_ecoli  |  |
| P0A705 | IF2_ECOLI  | * P71229 | P0A705 | hyfr_ecoli | if2_ecoli  |  |
| P0A705 | IF2_ECOLI  | * P0C054 | P0A705 | ibpa_ecoli | if2_ecoli  |  |
| P0A705 | IF2_ECOLI  | * P77432 | P0A705 | lsrk_ecoli | if2_ecoli  |  |
| P0A705 | IF2_ECOLI  | * P0AFF6 | P0A705 | nusa_ecoli | if2_ecoli  |  |
| P0A705 | IF2_ECOLI  | * P0AFF6 | P0A705 | nusa_ecoli | if2_ecoli  |  |
| P0A705 | IF2_ECOLI  | * P0AFF6 | P0A705 | nusa_ecoli | if2_ecoli  |  |
| P0A705 | IF2_ECOLI  | * P31473 | P0A705 | rava_ecoli | if2_ecoli  |  |
| P0A705 | IF2_ECOLI  | * P36979 | P0A705 | rlmn_ecoli | if2_ecoli  |  |
| P0A705 | IF2_ECOLI  | * P27434 | P0A705 | rodz_ecoli | if2_ecoli  |  |
| P0A705 | IF2_ECOLI  | * P00579 | P0A705 | rpod_ecoli | if2_ecoli  |  |
| P0A705 | IF2_ECOLI  | * P00579 | P0A705 | rpod_ecoli | if2_ecoli  |  |
| P0A705 | IF2_ECOLI  | * P0A6U5 | P0A705 | rsmg_ecoli | if2_ecoli  |  |
| P0A705 | IF2_ECOLI  | * P0AFZ3 | P0A705 | sspb_ecoli | if2_ecoli  |  |
| P0A705 | IF2_ECOLI  | * P0A832 | P0A705 | ssrp_ecoli | if2_ecoli  |  |
| P0A705 | IF2_ECOLI  | * P0AD05 | P0A705 | yeca_ecoli | if2_ecoli  |  |
| P0A705 | IF2_ECOLI  | * P0A8A2 | P0A705 | yeen_ecoli | if2_ecoli  |  |
| P0A707 | IF3_ECOLI  | * P36659 | P0A707 | cbpa_ecoli | if3_ecoli  |  |
| P0A707 | IF3_ECOLI  | * P36979 | P0A707 | rlmn_ecoli | if3_ecoli  |  |
| P0A707 | IF3_ECOLI  | * P21499 | P0A707 | rnr_ecoli  | if3_ecoli  |  |
| P0A707 | IF3_ECOLI  | * P10408 | P0A707 | seca_ecoli | if3_ecoli  |  |
| P0A6X7 | IHFA_ECOLI | * P0ACF4 | P0A6X7 | dbhb_ecoli | ihfa_ecoli |  |

|        |             |          |        |            |             |
|--------|-------------|----------|--------|------------|-------------|
| P0A6X7 | IHFA_ECOLI  | * P0AFS3 | P0A6X7 | folm_ecoli | ihfa_ecoli  |
| P0A6X7 | IHFA_ECOLI  | * P0A6Y1 | P0A6X7 | ihfb_ecoli | ihfa_ecoli  |
| P0A6X7 | IHFA_ECOLI  | * P0AAN9 | P0A6X7 | irap_ecoli | ihfa_ecoli  |
| P0A6X7 | IHFA_ECOLI  | * P43341 | P0A6X7 | lpxh_ecoli | ihfa_ecoli  |
| P0A6X7 | IHFA_ECOLI  | * P30958 | P0A6X7 | mfd_ecoli  | ihfa_ecoli  |
| P0A6X7 | IHFA_ECOLI  | * Q46865 | P0A6X7 | mqsr_ecoli | ihfa_ecoli  |
| P0A6X7 | IHFA_ECOLI  | * P68739 | P0A6X7 | nfi_ecoli  | ihfa_ecoli  |
| P0A6X7 | IHFA_ECOLI  | * P21499 | P0A6X7 | rnrr_ecoli | ihfa_ecoli  |
| P0A6X7 | IHFA_ECOLI  | * P0AGJ5 | P0A6X7 | yfif_ecoli | ihfa_ecoli  |
| P0A6Y1 | IHFB_ECOLI  | * P0ACF4 | P0A6Y1 | dbhb_ecoli | ihfb_ecoli  |
| P0A6Y1 | IHFB_ECOLI  | * P0ABW0 | P0A6Y1 | hcac_ecoli | ihfb_ecoli  |
| P0A6Y1 | IHFB_ECOLI  | * P0A6X7 | P0A6Y1 | ihfa_ecoli | ihfb_ecoli  |
| P0A6Y1 | IHFB_ECOLI  | * P68739 | P0A6Y1 | nfi_ecoli  | ihfb_ecoli  |
| P0ADG7 | IMDH_ECOLI  | * P0A6W5 | P0ADG7 | grea_ecoli | imd_h_ecoli |
| P11899 | IMMD_ECOLX  | * P17998 | P11899 | cead_ecolx | immd_ecoli  |
| P07673 | INCC2_ECOLX | none     |        |            |             |
| P39212 | INSN2_ECOLI | none     |        |            |             |
| P37326 | INTS_ECOLI  | * P0A6R0 | P37326 | fabh_ecoli | ints_ecoli  |
| P37326 | INTS_ECOLI  | * P23878 | P37326 | fepc_ecoli | ints_ecoli  |
| P37326 | INTS_ECOLI  | * P0ABX5 | P37326 | flgg_ecoli | ints_ecoli  |
| P37326 | INTS_ECOLI  | * P0AEN1 | P37326 | fre_ecoli  | ints_ecoli  |
| P37326 | INTS_ECOLI  | * P38393 | P37326 | kil_ecoli  | ints_ecoli  |
| P37326 | INTS_ECOLI  | * P43341 | P37326 | lpxh_ecoli | ints_ecoli  |
| P37326 | INTS_ECOLI  | * P39452 | P37326 | rir3_ecoli | ints_ecoli  |
| P37326 | INTS_ECOLI  | * P0AG44 | P37326 | rl17_ecoli | ints_ecoli  |
| P37326 | INTS_ECOLI  | * P00448 | P37326 | sodm_ecoli | ints_ecoli  |
| P0A7A9 | IPYR_ECOLI  | none     |        |            |             |
| P0AAC8 | ISCA_ECOLI  | * P32162 | P0AAC8 | yiis_ecoli | isca_ecoli  |
| P0A6B7 | ISCS_ECOLI  | * P0A6A8 | P0A6B7 | acp_ecoli  | iscs_ecoli  |
| P0A6B7 | ISCS_ECOLI  | * P05052 | P0A6B7 | appy_ecoli | iscs_ecoli  |
| P0A6B7 | ISCS_ECOLI  | * P0ABA4 | P0A6B7 | atpd_ecoli | iscs_ecoli  |
| P0A6B7 | ISCS_ECOLI  | * P69228 | P0A6B7 | baer_ecoli | iscs_ecoli  |
| P0A6B7 | ISCS_ECOLI  | * P0A9P0 | P0A6B7 | dldh_ecoli | iscs_ecoli  |
| P0A6B7 | ISCS_ECOLI  | * P0ABU2 | P0A6B7 | engd_ecoli | iscs_ecoli  |
| P0A6B7 | ISCS_ECOLI  | * P32177 | P0A6B7 | fdhd_ecoli | iscs_ecoli  |
| P0A6B7 | ISCS_ECOLI  | * P32177 | P0A6B7 | fdhd_ecoli | iscs_ecoli  |



|        |             |      |        |        |                            |                             |
|--------|-------------|------|--------|--------|----------------------------|-----------------------------|
| POA6B7 | ISCS_ECOLI  | *    | POA9R4 | POA6B7 | <a href="#">fer_ecoli</a>  | <a href="#">iscs_ecoli</a>  |
| POA6B7 | ISCS_ECOLI  | *    | POAC92 | POA6B7 | <a href="#">gnsa_ecoli</a> | <a href="#">iscs_ecoli</a>  |
| POA6B7 | ISCS_ECOLI  | *    | POABW0 | POA6B7 | hcac_ecoli                 | iscs_ecoli                  |
| POA6B7 | ISCS_ECOLI  | *    | P34749 | POA6B7 | hofq_ecoli                 | iscs_ecoli                  |
| POA6B7 | ISCS_ECOLI  | *    | P37353 | POA6B7 | mene_ecoli                 | iscs_ecoli                  |
| POA6B7 | ISCS_ECOLI  | *    | P16384 | POA6B7 | miaa_ecoli                 | iscs_ecoli                  |
| POA6B7 | ISCS_ECOLI  | *    | P11880 | POA6B7 | murf_ecoli                 | iscs_ecoli                  |
| POA6B7 | ISCS_ECOLI  | *    | P0ACD4 | POA6B7 | nifu_ecoli                 | iscs_ecoli                  |
| POA6B7 | ISCS_ECOLI  | *    | P0ACD4 | POA6B7 | nifu_ecoli                 | iscs_ecoli                  |
| POA6B7 | ISCS_ECOLI  | *    | P0ACD4 | POA6B7 | nifu_ecoli                 | iscs_ecoli                  |
| POA6B7 | ISCS_ECOLI  | *    | P0ACD4 | POA6B7 | nifu_ecoli                 | iscs_ecoli                  |
| POA6B7 | ISCS_ECOLI  | *    | P0ACD4 | POA6B7 | nifu_ecoli                 | iscs_ecoli                  |
| POA6B7 | ISCS_ECOLI  | *    | P0AFG0 | POA6B7 | nusg_ecoli                 | iscs_ecoli                  |
| POA6B7 | ISCS_ECOLI  | *    | P31057 | POA6B7 | panb_ecoli                 | iscs_ecoli                  |
| POA6B7 | ISCS_ECOLI  | *    | P07004 | POA6B7 | proa_ecoli                 | iscs_ecoli                  |
| POA6B7 | ISCS_ECOLI  | *    | P0A7E3 | POA6B7 | pyre_ecoli                 | iscs_ecoli                  |
| POA6B7 | ISCS_ECOLI  | *    | P77756 | POA6B7 | <a href="#">quec_ecoli</a> | <a href="#">iscs_ecoli</a>  |
| POA6B7 | ISCS_ECOLI  | *    | P09378 | POA6B7 | rhar_ecoli                 | iscs_ecoli                  |
| POA6B7 | ISCS_ECOLI  | *    | P0AEI4 | POA6B7 | <a href="#">rimo_ecoli</a> | <a href="#">iscs_ecoli</a>  |
| POA6B7 | ISCS_ECOLI  | *    | P36999 | POA6B7 | rlma_ecoli                 | iscs_ecoli                  |
| POA6B7 | ISCS_ECOLI  | *    | P0AFW4 | POA6B7 | rnk_ecoli                  | iscs_ecoli                  |
| POA6B7 | ISCS_ECOLI  | *    | P0A8R0 | POA6B7 | <a href="#">rraa_ecoli</a> | <a href="#">iscs_ecoli</a>  |
| POA6B7 | ISCS_ECOLI  | *    | P39902 | POA6B7 | sprt_ecoli                 | iscs_ecoli                  |
| POA6B7 | ISCS_ECOLI  | *    | P0A890 | POA6B7 | tusa_ecoli                 | iscs_ecoli                  |
| POA6B7 | ISCS_ECOLI  | *    | P0A890 | POA6B7 | tusa_ecoli                 | iscs_ecoli                  |
| POA6B7 | ISCS_ECOLI  | *    | P0AAT9 | POA6B7 | ybel_ecoli                 | iscs_ecoli                  |
| POA6B7 | ISCS_ECOLI  | *    | P64483 | POA6B7 | <a href="#">yeak_ecoli</a> | <a href="#">iscs_ecoli</a>  |
| POA6B7 | ISCS_ECOLI  | *    | P46887 | POA6B7 | yech_ecoli                 | iscs_ecoli                  |
| POA6B7 | ISCS_ECOLI  | *    | P0A6G3 | POA6B7 | ygad_ecoli                 | iscs_ecoli                  |
| POA6B7 | ISCS_ECOLI  | *    | P0ACV8 | POA6B7 | ymja_ecoli                 | iscs_ecoli                  |
|        |             |      |        |        |                            |                             |
| Q46893 | ISPD_ECOLI  | *    | P0A6J1 | Q46893 | cysc_ecoli                 | ispd_ecoli                  |
| Q46893 | ISPD_ECOLI  | *    | P0A850 | Q46893 | <a href="#">tig_ecoli</a>  | <a href="#">ispd_ecoli</a>  |
|        |             |      |        |        |                            |                             |
| P62617 | ISPF_ECOLI  | none |        |        |                            |                             |
|        |             |      |        |        |                            |                             |
| P14542 | IUTA_ECOLX  | none |        |        |                            |                             |
|        |             |      |        |        |                            |                             |
| P0AD59 | IVY_ECOLI   | none |        |        |                            |                             |
|        |             |      |        |        |                            |                             |
| P0AEW9 | K1PF_ECOLI  | none |        |        |                            |                             |
|        |             |      |        |        |                            |                             |
| POA796 | K6PF1_ECOLI | *    | P12281 | POA796 | <a href="#">moea_ecoli</a> | <a href="#">k6pf1_ecoli</a> |
| POA796 | K6PF1_ECOLI | *    | P0A858 | POA796 | tpis_ecoli                 | k6pf1_ecoli                 |
| POA796 | K6PF1_ECOLI | *    | P37440 | POA796 | ucpa_ecoli                 | k6pf1_ecoli                 |

|        |             |          |        |             |            |
|--------|-------------|----------|--------|-------------|------------|
| P69441 | KAD_ECOLI   | * P0A964 | P69441 | chew_ecoli  | kad_ecoli  |
| P69441 | KAD_ECOLI   | * P0A6G7 | P69441 | clpp_ecoli  | kad_ecoli  |
| P69441 | KAD_ECOLI   | * P0ADI4 | P69441 | entb_ecoli  | kad_ecoli  |
| P69441 | KAD_ECOLI   | * P0AAP3 | P69441 | frmr_ecoli  | kad_ecoli  |
| P69441 | KAD_ECOLI   | * P0A9Z1 | P69441 | glnb_ecoli  | kad_ecoli  |
| P69441 | KAD_ECOLI   | * P77249 | P69441 | sfmc_ecoli  | kad_ecoli  |
| P69441 | KAD_ECOLI   | * P0A850 | P69441 | tig_ecoli   | kad_ecoli  |
| P69441 | KAD_ECOLI   | * P0A8H6 | P69441 | yihi_ecoli  | kad_ecoli  |
|        |             |          |        |             |            |
| P13029 | KATG_ECOLI  | * P0AES0 | P13029 | gsp_ecoli   | katg_ecoli |
| P13029 | KATG_ECOLI  | * P0ABS8 | P13029 | hole_ecoli  | katg_ecoli |
| P13029 | KATG_ECOLI  | * P0A7A9 | P13029 | ipyr_ecoli  | katg_ecoli |
| P13029 | KATG_ECOLI  | * P22188 | P13029 | mure_ecoli  | katg_ecoli |
| P13029 | KATG_ECOLI  | * P69811 | P13029 | ptfah_ecoli | katg_ecoli |
| P13029 | KATG_ECOLI  | * P0AA25 | P13029 | thio_ecoli  | katg_ecoli |
|        |             |          |        |             |            |
| P0AB77 | KBL_ECOLI   | * P0AC73 | P0AB77 | ebgc_ecoli  | kbl_ecoli  |
| P0AB77 | KBL_ECOLI   | * P76104 | P0AB77 | ydcp_ecoli  | kbl_ecoli  |
|        |             |          |        |             |            |
| P04951 | KDSB_ECOLI  | * P45543 | P04951 | frld_ecoli  | kdsb_ecoli |
| P04951 | KDSB_ECOLI  | * P0A715 | P04951 | kdsa_ecoli  | kdsb_ecoli |
| P04951 | KDSB_ECOLI  | * P67430 | P04951 | nemr_ecoli  | kdsb_ecoli |
|        |             |          |        |             |            |
| P0ABZ4 | KDSC_ECOLI  | none     |        |             |            |
|        |             |          |        |             |            |
| P77338 | KEFA_ECOLI  | * P0A6E4 | P77338 | assy_ecoli  | kefa_ecoli |
| P77338 | KEFA_ECOLI  | * P0AFG0 | P77338 | nusg_ecoli  | kefa_ecoli |
| P77338 | KEFA_ECOLI  | * P21513 | P77338 | rne_ecoli   | kefa_ecoli |
| P77338 | KEFA_ECOLI  | * P21513 | P77338 | rne_ecoli   | kefa_ecoli |
| P77338 | KEFA_ECOLI  | * P21513 | P77338 | rne_ecoli   | kefa_ecoli |
| P77338 | KEFA_ECOLI  | * P21513 | P77338 | rne_ecoli   | kefa_ecoli |
| P77338 | KEFA_ECOLI  | * P21513 | P77338 | rne_ecoli   | kefa_ecoli |
| P77338 | KEFA_ECOLI  | * P21513 | P77338 | rne_ecoli   | kefa_ecoli |
| P77338 | KEFA_ECOLI  | * P21513 | P77338 | rne_ecoli   | kefa_ecoli |
|        |             |          |        |             |            |
| P60546 | KGUA_ECOLI  | none     |        |             |            |
|        |             |          |        |             |            |
| P00547 | KHSE_ECOLI  | none     |        |             |            |
|        |             |          |        |             |            |
| Q52328 | KLAB_ECOLX  | none     |        |             |            |
|        |             |          |        |             |            |
| Q52313 | KORB1_ECOLX | none     |        |             |            |
|        |             |          |        |             |            |
| P0A717 | KPRS_ECOLI  | * P52697 | P0A717 | 6pgl_ecoli  | kprs_ecoli |

|        |            |          |        |             |            |
|--------|------------|----------|--------|-------------|------------|
| POA717 | KPRS_ECOLI | * P67662 | POA717 | aaer_ecoli  | kprs_ecoli |
| POA717 | KPRS_ECOLI | * P0ABD5 | POA717 | acca_ecoli  | kprs_ecoli |
| POA717 | KPRS_ECOLI | * P0ACRO | POA717 | alls_ecoli  | kprs_ecoli |
| POA717 | KPRS_ECOLI | * P0A9Q1 | POA717 | arca_ecoli  | kprs_ecoli |
| POA717 | KPRS_ECOLI | * P30843 | POA717 | basr_ecoli  | kprs_ecoli |
| POA717 | KPRS_ECOLI | * P17446 | POA717 | beti_ecoli  | kprs_ecoli |
| POA717 | KPRS_ECOLI | * P12995 | POA717 | bioa_ecoli  | kprs_ecoli |
| POA717 | KPRS_ECOLI | * P12999 | POA717 | bioc_ecoli  | kprs_ecoli |
| POA717 | KPRS_ECOLI | * P0A6G7 | POA717 | clpp_ecoli  | kprs_ecoli |
| POA717 | KPRS_ECOLI | * P0A972 | POA717 | cspe_ecoli  | kprs_ecoli |
| POA717 | KPRS_ECOLI | * P00816 | POA717 | cyns_ecoli  | kprs_ecoli |
| POA717 | KPRS_ECOLI | * P0ABJ1 | POA717 | cyoa_ecoli  | kprs_ecoli |
| POA717 | KPRS_ECOLI | * P21693 | POA717 | dbpa_ecoli  | kprs_ecoli |
| POA717 | KPRS_ECOLI | * P77268 | POA717 | ddpd_ecoli  | kprs_ecoli |
| POA717 | KPRS_ECOLI | * P77622 | POA717 | ddpf_ecoli  | kprs_ecoli |
| POA717 | KPRS_ECOLI | * P0AEF4 | POA717 | dpia_ecoli  | kprs_ecoli |
| POA717 | KPRS_ECOLI | * P50465 | POA717 | end8_ecoli  | kprs_ecoli |
| POA717 | KPRS_ECOLI | * P39176 | POA717 | erfk_ecoli  | kprs_ecoli |
| POA717 | KPRS_ECOLI | * P08394 | POA717 | ex5b_ecoli  | kprs_ecoli |
| POA717 | KPRS_ECOLI | * P24216 | POA717 | flid_ecoli  | kprs_ecoli |
| POA717 | KPRS_ECOLI | * P0A9E5 | POA717 | fnr_ecoli   | kprs_ecoli |
| POA717 | KPRS_ECOLI | * P0A9R7 | POA717 | ftse_ecoli  | kprs_ecoli |
| POA717 | KPRS_ECOLI | * P05042 | POA717 | fumc_ecoli  | kprs_ecoli |
| POA717 | KPRS_ECOLI | * P0A6W5 | POA717 | grea_ecoli  | kprs_ecoli |
| POA717 | KPRS_ECOLI | * P0ACF8 | POA717 | hns_ecoli   | kprs_ecoli |
| POA717 | KPRS_ECOLI | * P51020 | POA717 | hoa_ecoli   | kprs_ecoli |
| POA717 | KPRS_ECOLI | * P0A7B8 | POA717 | hslv_ecoli  | kprs_ecoli |
| POA717 | KPRS_ECOLI | * P0AEV7 | POA717 | hych_ecoli  | kprs_ecoli |
| POA717 | KPRS_ECOLI | * P0AD61 | POA717 | kpyk1_ecoli | kprs_ecoli |
| POA717 | KPRS_ECOLI | * P0A9S7 | POA717 | livg_ecoli  | kprs_ecoli |
| POA717 | KPRS_ECOLI | * P10441 | POA717 | lpxb_ecoli  | kprs_ecoli |
| POA717 | KPRS_ECOLI | * P00946 | POA717 | mana_ecoli  | kprs_ecoli |
| POA717 | KPRS_ECOLI | * P05704 | POA717 | mcp3_ecoli  | kprs_ecoli |
| POA717 | KPRS_ECOLI | * P0ACH8 | POA717 | melr_ecoli  | kprs_ecoli |
| POA717 | KPRS_ECOLI | * P0A817 | POA717 | metk_ecoli  | kprs_ecoli |
| POA717 | KPRS_ECOLI | * P0AEI1 | POA717 | miab_ecoli  | kprs_ecoli |
| POA717 | KPRS_ECOLI | * P13669 | POA717 | mngr_ecoli  | kprs_ecoli |
| POA717 | KPRS_ECOLI | * P0A9F1 | POA717 | mntr_ecoli  | kprs_ecoli |
| POA717 | KPRS_ECOLI | * P31060 | POA717 | modf_ecoli  | kprs_ecoli |
| POA717 | KPRS_ECOLI | * P22186 | POA717 | mraz_ecoli  | kprs_ecoli |
| POA717 | KPRS_ECOLI | * P22523 | POA717 | mukb_ecoli  | kprs_ecoli |
| POA717 | KPRS_ECOLI | * P22524 | POA717 | muke_ecoli  | kprs_ecoli |
| POA717 | KPRS_ECOLI | * Q47005 | POA717 | nac_ecoli   | kprs_ecoli |
| POA717 | KPRS_ECOLI | * P19318 | POA717 | nary_ecoli  | kprs_ecoli |
| POA717 | KPRS_ECOLI | * P0AF63 | POA717 | nsrr_ecoli  | kprs_ecoli |

|        |            |          |        |                             |                            |
|--------|------------|----------|--------|-----------------------------|----------------------------|
| POA717 | KPRS_ECOLI | * P0AA16 | POA717 | <a href="#">ompr_ecoli</a>  | <a href="#">kprs_ecoli</a> |
| POA717 | KPRS_ECOLI | * P05041 | POA717 | <a href="#">pabb_ecoli</a>  | <a href="#">kprs_ecoli</a> |
| POA717 | KPRS_ECOLI | * P16682 | POA717 | <a href="#">phnd_ecoli</a>  | <a href="#">kprs_ecoli</a> |
| POA717 | KPRS_ECOLI | * P0A7B5 | POA717 | <a href="#">prob_ecoli</a>  | <a href="#">kprs_ecoli</a> |
| POA717 | KPRS_ECOLI | * P55799 | POA717 | <a href="#">prp2_ecoli</a>  | <a href="#">kprs_ecoli</a> |
| POA717 | KPRS_ECOLI | * P0A7D1 | POA717 | <a href="#">pth_ecoli</a>   | <a href="#">kprs_ecoli</a> |
| POA717 | KPRS_ECOLI | * P15254 | POA717 | <a href="#">pur4_ecoli</a>  | <a href="#">kprs_ecoli</a> |
| POA717 | KPRS_ECOLI | * P36767 | POA717 | <a href="#">rdgc_ecoli</a>  | <a href="#">kprs_ecoli</a> |
| POA717 | KPRS_ECOLI | * P0A7H6 | POA717 | <a href="#">recr_ecoli</a>  | <a href="#">kprs_ecoli</a> |
| POA717 | KPRS_ECOLI | * P33643 | POA717 | <a href="#">rlud_ecoli</a>  | <a href="#">kprs_ecoli</a> |
| POA717 | KPRS_ECOLI | * P37760 | POA717 | <a href="#">rml_d_ecoli</a> | <a href="#">kprs_ecoli</a> |
| POA717 | KPRS_ECOLI | * P0AFW4 | POA717 | <a href="#">rnk_ecoli</a>   | <a href="#">kprs_ecoli</a> |
| POA717 | KPRS_ECOLI | * P60390 | POA717 | <a href="#">rsmh_ecoli</a>  | <a href="#">kprs_ecoli</a> |
| POA717 | KPRS_ECOLI | * P52108 | POA717 | <a href="#">rsta_ecoli</a>  | <a href="#">kprs_ecoli</a> |
| POA717 | KPRS_ECOLI | * P0A8I1 | POA717 | <a href="#">ruvx_ecoli</a>  | <a href="#">kprs_ecoli</a> |
| POA717 | KPRS_ECOLI | * P13458 | POA717 | <a href="#">sbcc_ecoli</a>  | <a href="#">kprs_ecoli</a> |
| POA717 | KPRS_ECOLI | * P0AGM5 | POA717 | <a href="#">sirb1_ecoli</a> | <a href="#">kprs_ecoli</a> |
| POA717 | KPRS_ECOLI | * P39902 | POA717 | <a href="#">sprt_ecoli</a>  | <a href="#">kprs_ecoli</a> |
| POA717 | KPRS_ECOLI | * P77515 | POA717 | <a href="#">stfq_ecoli</a>  | <a href="#">kprs_ecoli</a> |
| POA717 | KPRS_ECOLI | * P0ACG1 | POA717 | <a href="#">stpa_ecoli</a>  | <a href="#">kprs_ecoli</a> |
| POA717 | KPRS_ECOLI | * P0A836 | POA717 | <a href="#">succ_ecoli</a>  | <a href="#">kprs_ecoli</a> |
| POA717 | KPRS_ECOLI | * P07464 | POA717 | <a href="#">thga_ecoli</a>  | <a href="#">kprs_ecoli</a> |
| POA717 | KPRS_ECOLI | * P0AGG4 | POA717 | <a href="#">thio2_ecoli</a> | <a href="#">kprs_ecoli</a> |
| POA717 | KPRS_ECOLI | * P0A858 | POA717 | <a href="#">tpis_ecoli</a>  | <a href="#">kprs_ecoli</a> |
| POA717 | KPRS_ECOLI | * P0A890 | POA717 | <a href="#">tusa_ecoli</a>  | <a href="#">kprs_ecoli</a> |
| POA717 | KPRS_ECOLI | * P12295 | POA717 | <a href="#">ung_ecoli</a>   | <a href="#">kprs_ecoli</a> |
| POA717 | KPRS_ECOLI | * P77414 | POA717 | <a href="#">wcaa_ecoli</a>  | <a href="#">kprs_ecoli</a> |
| POA717 | KPRS_ECOLI | * P45563 | POA717 | <a href="#">xapa_ecoli</a>  | <a href="#">kprs_ecoli</a> |
| POA717 | KPRS_ECOLI | * P0A8P6 | POA717 | <a href="#">xerc_ecoli</a>  | <a href="#">kprs_ecoli</a> |
| POA717 | KPRS_ECOLI | * P0A8P8 | POA717 | <a href="#">xerd_ecoli</a>  | <a href="#">kprs_ecoli</a> |
| POA717 | KPRS_ECOLI | * Q47156 | POA717 | <a href="#">yafn_ecoli</a>  | <a href="#">kprs_ecoli</a> |
| POA717 | KPRS_ECOLI | * P77700 | POA717 | <a href="#">yahb_ecoli</a>  | <a href="#">kprs_ecoli</a> |
| POA717 | KPRS_ECOLI | * P77736 | POA717 | <a href="#">yahd_ecoli</a>  | <a href="#">kprs_ecoli</a> |
| POA717 | KPRS_ECOLI | * P77187 | POA717 | <a href="#">yahf_ecoli</a>  | <a href="#">kprs_ecoli</a> |
| POA717 | KPRS_ECOLI | * P0A9T6 | POA717 | <a href="#">ybaq_ecoli</a>  | <a href="#">kprs_ecoli</a> |
| POA717 | KPRS_ECOLI | * P0AA84 | POA717 | <a href="#">ybho_ecoli</a>  | <a href="#">kprs_ecoli</a> |
| POA717 | KPRS_ECOLI | * P28306 | POA717 | <a href="#">yceg_ecoli</a>  | <a href="#">kprs_ecoli</a> |
| POA717 | KPRS_ECOLI | * P27431 | POA717 | <a href="#">ycfd_ecoli</a>  | <a href="#">kprs_ecoli</a> |
| POA717 | KPRS_ECOLI | * P0AB55 | POA717 | <a href="#">ycii_ecoli</a>  | <a href="#">kprs_ecoli</a> |
| POA717 | KPRS_ECOLI | * P77333 | POA717 | <a href="#">ycjz_ecoli</a>  | <a href="#">kprs_ecoli</a> |
| POA717 | KPRS_ECOLI | * P76064 | POA717 | <a href="#">ydat_ecoli</a>  | <a href="#">kprs_ecoli</a> |
| POA717 | KPRS_ECOLI | * P76108 | POA717 | <a href="#">ydcs_ecoli</a>  | <a href="#">kprs_ecoli</a> |
| POA717 | KPRS_ECOLI | * P77564 | POA717 | <a href="#">ydhw_ecoli</a>  | <a href="#">kprs_ecoli</a> |
| POA717 | KPRS_ECOLI | * P0A8A4 | POA717 | <a href="#">ydia_ecoli</a>  | <a href="#">kprs_ecoli</a> |
| POA717 | KPRS_ECOLI | * P76204 | POA717 | <a href="#">ydiv_ecoli</a>  | <a href="#">kprs_ecoli</a> |

|        |             |          |        |            |             |
|--------|-------------|----------|--------|------------|-------------|
| P0A717 | KPRS_ECOLI  | * P77721 | P0A717 | ydjf_ecoli | kprs_ecoli  |
| P0A717 | KPRS_ECOLI  | * P64483 | P0A717 | yeak_ecoli | kprs_ecoli  |
| P0A717 | KPRS_ECOLI  | * P76241 | P0A717 | yeam_ecoli | kprs_ecoli  |
| P0A717 | KPRS_ECOLI  | * P0A8A0 | P0A717 | yebc_ecoli | kprs_ecoli  |
| P0A717 | KPRS_ECOLI  | * P78271 | P0A717 | yfes_ecoli | kprs_ecoli  |
| P0A717 | KPRS_ECOLI  | * P77538 | P0A717 | yfhr_ecoli | kprs_ecoli  |
| P0A717 | KPRS_ECOLI  | * P33634 | P0A717 | yfie_ecoli | kprs_ecoli  |
| P0A717 | KPRS_ECOLI  | * P52126 | P0A717 | yfjk_ecoli | kprs_ecoli  |
| P0A717 | KPRS_ECOLI  | * P52133 | P0A717 | yfjr_ecoli | kprs_ecoli  |
| P0A717 | KPRS_ECOLI  | * Q46888 | P0A717 | ygbj_ecoli | kprs_ecoli  |
| P0A717 | KPRS_ECOLI  | * P42624 | P0A717 | yhak_ecoli | kprs_ecoli  |
| P0A717 | KPRS_ECOLI  | * P31449 | P0A717 | yidl_ecoli | kprs_ecoli  |
| P0A717 | KPRS_ECOLI  | * P77309 | P0A717 | ynej_ecoli | kprs_ecoli  |
| P0A717 | KPRS_ECOLI  | * P76612 | P0A717 | ypjb_ecoli | kprs_ecoli  |
| P0A717 | KPRS_ECOLI  | * P0ADU7 | P0A717 | yqib_ecoli | kprs_ecoli  |
|        |             |          |        |            |             |
| P0AD61 | KPYK1_ECOLI | * P15034 | P0AD61 | ampp_ecoli | kpyk1_ecoli |
| P0AD61 | KPYK1_ECOLI | * P0ABH7 | P0AD61 | cisy_ecoli | kpyk1_ecoli |
| P0AD61 | KPYK1_ECOLI | * P05042 | P0AD61 | fumc_ecoli | kpyk1_ecoli |
|        |             |          |        |            |             |
| P21599 | KPYK2_ECOLI | * P09373 | P21599 | pflb_ecoli | kpyk2_ecoli |
| P21599 | KPYK2_ECOLI | * P0AA25 | P21599 | thio_ecoli | kpyk2_ecoli |
| P21599 | KPYK2_ECOLI | * P08390 | P21599 | usg_ecoli  | kpyk2_ecoli |
|        |             |          |        |            |             |
| P52643 | LDHD_ECOLI  | none     |        |            |             |
|        |             |          |        |            |             |
| P00803 | LEP_ECOLI   | * P00803 | P00803 | lep_ecoli  | lep_ecoli   |
|        |             |          |        |            |             |
| P60785 | LEPA_ECOLI  | * P27249 | P60785 | glnd_ecoli | lepa_ecoli  |
| P60785 | LEPA_ECOLI  | * P0A8L7 | P60785 | yciu_ecoli | lepa_ecoli  |
|        |             |          |        |            |             |
| P60716 | LIPA_ECOLI  | * P15038 | P60716 | held_ecoli | lipa_ecoli  |
| P60716 | LIPA_ECOLI  | * P17952 | P60716 | murc_ecoli | lipa_ecoli  |
| P60716 | LIPA_ECOLI  | * P0AFG3 | P60716 | odo1_ecoli | lipa_ecoli  |
| P60716 | LIPA_ECOLI  | * P0AFG6 | P60716 | odo2_ecoli | lipa_ecoli  |
|        |             |          |        |            |             |
| P33232 | LLDD_ECOLI  | * P0AEL6 | P33232 | fepb_ecoli | lidd_ecoli  |
| P33232 | LLDD_ECOLI  | * P77774 | P33232 | yfgl_ecoli | lidd_ecoli  |
| P33232 | LLDD_ECOLI  | * P23305 | P33232 | yiga_ecoli | lidd_ecoli  |
| P33232 | LLDD_ECOLI  | * P0A9V8 | P33232 | yihu_ecoli | lidd_ecoli  |
|        |             |          |        |            |             |
| P0A9M0 | LON_ECOLI   | * P37617 | P0A9M0 | atzn_ecoli | lon_ecoli   |
| P0A9M0 | LON_ECOLI   | * P36659 | P0A9M0 | cbpa_ecoli | lon_ecoli   |
| P0A9M0 | LON_ECOLI   | * P0A6F5 | P0A9M0 | ch60_ecoli | lon_ecoli   |
| P0A9M0 | LON_ECOLI   | * P77390 | P0A9M0 | citc_ecoli | lon_ecoli   |

|        |           |   |        |        |             |           |
|--------|-----------|---|--------|--------|-------------|-----------|
| P0A9M0 | LON_ECOLI | * | P0A6G7 | P0A9M0 | clpp_ecoli  | lon_ecoli |
| P0A9M0 | LON_ECOLI | * | P0A8Q6 | P0A9M0 | clps_ecoli  | lon_ecoli |
| P0A9M0 | LON_ECOLI | * | P0ABJ1 | P0A9M0 | cyoa_ecoli  | lon_ecoli |
| P0A9M0 | LON_ECOLI | * | P77359 | P0A9M0 | djlc_ecoli  | lon_ecoli |
| P0A9M0 | LON_ECOLI | * | P0A6Y8 | P0A9M0 | dnak_ecoli  | lon_ecoli |
| P0A9M0 | LON_ECOLI | * | P03007 | P0A9M0 | dpo3e_ecoli | lon_ecoli |
| P0A9M0 | LON_ECOLI | * | P0ABT2 | P0A9M0 | dps_ecoli   | lon_ecoli |
| P0A9M0 | LON_ECOLI | * | P77488 | P0A9M0 | dxs_ecoli   | lon_ecoli |
| P0A9M0 | LON_ECOLI | * | P0A6C1 | P0A9M0 | end4_ecoli  | lon_ecoli |
| P0A9M0 | LON_ECOLI | * | P0ADI4 | P0A9M0 | entb_ecoli  | lon_ecoli |
| P0A9M0 | LON_ECOLI | * | P06616 | P0A9M0 | era_ecoli   | lon_ecoli |
| P0A9M0 | LON_ECOLI | * | P0A6Q6 | P0A9M0 | fabz_ecoli  | lon_ecoli |
| P0A9M0 | LON_ECOLI | * | P61949 | P0A9M0 | flav_ecoli  | lon_ecoli |
| P0A9M0 | LON_ECOLI | * | P0ABX5 | P0A9M0 | flgg_ecoli  | lon_ecoli |
| P0A9M0 | LON_ECOLI | * | P09372 | P0A9M0 | grpe_ecoli  | lon_ecoli |
| P0A9M0 | LON_ECOLI | * | P0A6X3 | P0A9M0 | hfq_ecoli   | lon_ecoli |
| P0A9M0 | LON_ECOLI | * | P28905 | P0A9M0 | holc_ecoli  | lon_ecoli |
| P0A9M0 | LON_ECOLI | * | P0A6H5 | P0A9M0 | hslu_ecoli  | lon_ecoli |
| P0A9M0 | LON_ECOLI | * | P61316 | P0A9M0 | lola_ecoli  | lon_ecoli |
| P0A9M0 | LON_ECOLI | * | P77432 | P0A9M0 | lsrk_ecoli  | lon_ecoli |
| P0A9M0 | LON_ECOLI | * | P30748 | P0A9M0 | moad_ecoli  | lon_ecoli |
| P0A9M0 | LON_ECOLI | * | P19318 | P0A9M0 | nary_ecoli  | lon_ecoli |
| P0A9M0 | LON_ECOLI | * | P76577 | P0A9M0 | pbpc_ecoli  | lon_ecoli |
| P0A9M0 | LON_ECOLI | * | P15254 | P0A9M0 | pur4_ecoli  | lon_ecoli |
| P0A9M0 | LON_ECOLI | * | P27240 | P0A9M0 | rfay_ecoli  | lon_ecoli |
| P0A9M0 | LON_ECOLI | * | P0C0R7 | P0A9M0 | rlme_ecoli  | lon_ecoli |
| P0A9M0 | LON_ECOLI | * | P36979 | P0A9M0 | rlmn_ecoli  | lon_ecoli |
| P0A9M0 | LON_ECOLI | * | P0A8T7 | P0A9M0 | rpoc_ecoli  | lon_ecoli |
| P0A9M0 | LON_ECOLI | * | P0AG86 | P0A9M0 | secb_ecoli  | lon_ecoli |
| P0A9M0 | LON_ECOLI | * | P0AG86 | P0A9M0 | secb_ecoli  | lon_ecoli |
| P0A9M0 | LON_ECOLI | * | P0A828 | P0A9M0 | smg_ecoli   | lon_ecoli |
| P0A9M0 | LON_ECOLI | * | P0AGD7 | P0A9M0 | srp54_ecoli | lon_ecoli |
| P0A9M0 | LON_ECOLI | * | P0AFZ3 | P0A9M0 | sspb_ecoli  | lon_ecoli |
| P0A9M0 | LON_ECOLI | * | P0AG78 | P0A9M0 | subi_ecoli  | lon_ecoli |
| P0A9M0 | LON_ECOLI | * | P77444 | P0A9M0 | sufs_ecoli  | lon_ecoli |
| P0A9M0 | LON_ECOLI | * | P77735 | P0A9M0 | yajo_ecoli  | lon_ecoli |
| P0A9M0 | LON_ECOLI | * | P0AAT4 | P0A9M0 | ybdg_ecoli  | lon_ecoli |
| P0A9M0 | LON_ECOLI | * | P12994 | P0A9M0 | ybhb_ecoli  | lon_ecoli |
| P0A9M0 | LON_ECOLI | * | P75828 | P0A9M0 | ybjd_ecoli  | lon_ecoli |
| P0A9M0 | LON_ECOLI | * | P75990 | P0A9M0 | ycgf_ecoli  | lon_ecoli |
| P0A9M0 | LON_ECOLI | * | P76046 | P0A9M0 | ycjx_ecoli  | lon_ecoli |
| P0A9M0 | LON_ECOLI | * | P77721 | P0A9M0 | ydjf_ecoli  | lon_ecoli |
| P0A9M0 | LON_ECOLI | * | Q46802 | P0A9M0 | ygev_ecoli  | lon_ecoli |
| P0A9M0 | LON_ECOLI | * | P45527 | P0A9M0 | yhbu_ecoli  | lon_ecoli |
| P0A9M0 | LON_ECOLI | * | P39285 | P0A9M0 | yjep_ecoli  | lon_ecoli |



|        |            |          |        |            |            |
|--------|------------|----------|--------|------------|------------|
| P0A9M0 | LON_ECOLI  | * P0AAS5 | P0A9M0 | ylbf_ecoli | lon_ecoli  |
| P75867 | LONH_ECOLI | none     |        |            |            |
| P69776 | LPP_ECOLI  | * P69776 | P69776 | lpp_ecoli  | lpp_ecoli  |
| P0A722 | LPXA_ECOLI | * P21645 | P0A722 | lpxd_ecoli | lpxa_ecoli |
| P0A722 | LPXA_ECOLI | * P10442 | P0A722 | rnh2_ecoli | lpxa_ecoli |
| P0A722 | LPXA_ECOLI | * P0ADS2 | P0A722 | zapa_ecoli | lpxa_ecoli |
| P10441 | LPXB_ECOLI | * P45523 | P10441 | fkba_ecoli | lpxb_ecoli |
| P10441 | LPXB_ECOLI | * P0A6B7 | P10441 | iscs_ecoli | lpxb_ecoli |
| P21645 | LPXD_ECOLI | * P0A6A8 | P21645 | acp_ecoli  | lpxd_ecoli |
| P21645 | LPXD_ECOLI | * P0A6A8 | P21645 | acp_ecoli  | lpxd_ecoli |
| P21645 | LPXD_ECOLI | * P15042 | P21645 | dnlj_ecoli | lpxd_ecoli |
| P21645 | LPXD_ECOLI | * P0A6X3 | P21645 | hfq_ecoli  | lpxd_ecoli |
| P21645 | LPXD_ECOLI | * P07004 | P21645 | proa_ecoli | lpxd_ecoli |
| P0ACJ0 | LRP_ECOLI  | * P0ABQ4 | P0ACJ0 | dyr_ecoli  | lrp_ecoli  |
| P0ACJ0 | LRP_ECOLI  | * P76556 | P0ACJ0 | eutp_ecoli | lrp_ecoli  |
| P0ACJ0 | LRP_ECOLI  | * P0A744 | P0ACJ0 | msra_ecoli | lrp_ecoli  |
| P0ACJ0 | LRP_ECOLI  | * P77737 | P0ACJ0 | oppf_ecoli | lrp_ecoli  |
| P0ACJ0 | LRP_ECOLI  | * P0AFZ3 | P0ACJ0 | sspb_ecoli | lrp_ecoli  |
| P0ACJ0 | LRP_ECOLI  | * P0A8F0 | P0ACJ0 | upp_ecoli  | lrp_ecoli  |
| P75823 | LTAE_ECOLI | none     |        |            |            |
| P45578 | LUXS_ECOLI | * P0A850 | P45578 | tig_ecoli  | luxs_ecoli |
| P45578 | LUXS_ECOLI | * P39408 | P45578 | yjjv_ecoli | luxs_ecoli |
| P78285 | LYSD_ECOLI | * P42604 | P78285 | uxaa_ecoli | lysd_ecoli |
| P78285 | LYSD_ECOLI | * P76012 | P78285 | ycgy_ecoli | lysd_ecoli |
| P03030 | LYSR_ECOLI | * P24554 | P03030 | rada_ecoli | lysr_ecoli |
| P03030 | LYSR_ECOLI | * P0A9W0 | P03030 | ular_ecoli | lysr_ecoli |
| P0AEX9 | MALE_ECOLI | * P0A6F9 | P0AEX9 | ch10_ecoli | male_ecoli |
| P0AEX9 | MALE_ECOLI | * P0A6F9 | P0AEX9 | ch10_ecoli | male_ecoli |
| P0AEX9 | MALE_ECOLI | * P0A6F5 | P0AEX9 | ch60_ecoli | male_ecoli |
| P0AEX9 | MALE_ECOLI | * P0A6F5 | P0AEX9 | ch60_ecoli | male_ecoli |
| P0AEX9 | MALE_ECOLI | * P0A6F5 | P0AEX9 | ch60_ecoli | male_ecoli |
| P0AEX9 | MALE_ECOLI | * P08622 | P0AEX9 | dnaj_ecoli | male_ecoli |
| P0AEX9 | MALE_ECOLI | * P0C0L2 | P0AEX9 | osmc_ecoli | male_ecoli |
| P0AEX9 | MALE_ECOLI | * P0A870 | P0AEX9 | talb_ecoli | male_ecoli |

|        |            |   |        |        |             |            |
|--------|------------|---|--------|--------|-------------|------------|
| P0AEX9 | MALE_ECOLI | * | P0AA25 | P0AEX9 | thio_ecoli  | male_ecoli |
| P68187 | MALK_ECOLI | * | P0A9A6 | P68187 | fts_z_ecoli | malk_ecoli |
| P68187 | MALK_ECOLI | * | P0AES4 | P68187 | gyra_ecoli  | malk_ecoli |
| P68187 | MALK_ECOLI | * | P0C054 | P68187 | ibpa_ecoli  | malk_ecoli |
| P68187 | MALK_ECOLI | * | P0C054 | P68187 | ibpa_ecoli  | malk_ecoli |
| P68187 | MALK_ECOLI | * | P0C058 | P68187 | ibpb_ecoli  | malk_ecoli |
| P68187 | MALK_ECOLI | * | P0A9X4 | P68187 | mreb_ecoli  | malk_ecoli |
| P15977 | MALQ_ECOLI | * | P0ACF0 | P15977 | dbha_ecoli  | malq_ecoli |
| P15977 | MALQ_ECOLI | * | P0ACF4 | P15977 | dbhb_ecoli  | malq_ecoli |
| P15977 | MALQ_ECOLI | * | P0ACF4 | P15977 | dbhb_ecoli  | malq_ecoli |
| P15977 | MALQ_ECOLI | * | P0ACF8 | P15977 | hns_ecoli   | malq_ecoli |
| P15977 | MALQ_ECOLI | * | P0AF10 | P15977 | mtlr_ecoli  | malq_ecoli |
| P15977 | MALQ_ECOLI | * | P0A7V0 | P15977 | rs2_ecoli   | malq_ecoli |
| P15977 | MALQ_ECOLI | * | P09184 | P15977 | vsr_ecoli   | malq_ecoli |
| P06993 | MALT_ECOLI | * | P0A6A8 | P06993 | acp_ecoli   | malt_ecoli |
| P06993 | MALT_ECOLI | * | P08622 | P06993 | dnaj_ecoli  | malt_ecoli |
| P06993 | MALT_ECOLI | * | P0C8J6 | P06993 | gaty_ecoli  | malt_ecoli |
| P06993 | MALT_ECOLI | * | P0C054 | P06993 | ibpa_ecoli  | malt_ecoli |
| P06993 | MALT_ECOLI | * | P0C058 | P06993 | ibpb_ecoli  | malt_ecoli |
| P06993 | MALT_ECOLI | * | P0A9X4 | P06993 | mreb_ecoli  | malt_ecoli |
| P06993 | MALT_ECOLI | * | P17443 | P06993 | murg_ecoli  | malt_ecoli |
| P06993 | MALT_ECOLI | * | P0A9K3 | P06993 | phol_ecoli  | malt_ecoli |
| P06993 | MALT_ECOLI | * | P41409 | P06993 | riha_ecoli  | malt_ecoli |
| P06993 | MALT_ECOLI | * | P36979 | P06993 | rlmn_ecoli  | malt_ecoli |
| P00946 | MANA_ECOLI |   | none   |        |             |            |
| P0AEY1 | MARC_ECOLI |   | none   |        |             |            |
| P08997 | MASY_ECOLI | * | P39451 | P08997 | adh_p_ecoli | masy_ecoli |
| P08997 | MASY_ECOLI | * | P08203 | P08997 | arad_ecoli  | masy_ecoli |
| P08997 | MASY_ECOLI | * | P76461 | P08997 | atob_ecoli  | masy_ecoli |
| P08997 | MASY_ECOLI | * | P15067 | P08997 | glg_x_ecoli | masy_ecoli |
| P08997 | MASY_ECOLI | * | P0A847 | P08997 | tgt_ecoli   | masy_ecoli |
| P37330 | MASZ_ECOLI | * | P63284 | P37330 | clpb_ecoli  | masz_ecoli |
| P37330 | MASZ_ECOLI | * | P77611 | P37330 | rnfc_ecoli  | masz_ecoli |
| P37330 | MASZ_ECOLI | * | P0AD33 | P37330 | yfcz_ecoli  | masz_ecoli |
| P37330 | MASZ_ECOLI | * | P77434 | P37330 | yfdz_ecoli  | masz_ecoli |
| P37330 | MASZ_ECOLI | * | P32162 | P37330 | yiis_ecoli  | masz_ecoli |
| P0ACD8 | MBHL_ECOLI | * | P05052 | P0ACD8 | appy_ecoli  | mbhl_ecoli |

|        |            |   |        |        |            |            |
|--------|------------|---|--------|--------|------------|------------|
| P0ACD8 | MBHL_ECOLI | * | P0AAM7 | P0ACD8 | hybg_ecoli | mbhl_ecoli |
| P0ACD8 | MBHL_ECOLI | * | P69451 | P0ACD8 | lcfa_ecoli | mbhl_ecoli |
| P0ACD8 | MBHL_ECOLI | * | P69741 | P0ACD8 | mbht_ecoli | mbhl_ecoli |
| P0ACD8 | MBHL_ECOLI | * | P0A7E1 | P0ACD8 | pyrd_ecoli | mbhl_ecoli |
| P0ACD8 | MBHL_ECOLI | * | P39406 | P0ACD8 | rsmc_ecoli | mbhl_ecoli |
| P0ACD8 | MBHL_ECOLI | * | P28912 | P0ACD8 | yhhi_ecoli | mbhl_ecoli |
| P69739 | MBHS_ECOLI |   | none   |        |            |            |
| P0AEY5 | MDAB_ECOLI |   | none   |        |            |            |
| P61889 | MDH_ECOLI  | * | P0A6F5 | P61889 | ch60_ecoli | mdh_ecoli  |
| P61889 | MDH_ECOLI  | * | P25522 | P61889 | mnme_ecoli | mdh_ecoli  |
| P61889 | MDH_ECOLI  | * | P0AB43 | P61889 | ycgl_ecoli | mdh_ecoli  |
| P37636 | MDTE_ECOLI | * | P0ABI4 | P37636 | cora_ecoli | mdte_ecoli |
| P37636 | MDTE_ECOLI | * | P37636 | P37636 | mdte_ecoli | mdte_ecoli |
| P37636 | MDTE_ECOLI | * | P37636 | P37636 | mdte_ecoli | mdte_ecoli |
| P32715 | MDTO_ECOLI | * | P07395 | P32715 | syfb_ecoli | mdto_ecoli |
| P32715 | MDTO_ECOLI | * | P0AB43 | P32715 | ycgl_ecoli | mdto_ecoli |
| P0ABU0 | MENB_ECOLI | * | P37355 | P0ABU0 | menh_ecoli | menb_ecoli |
| P0ABU0 | MENB_ECOLI | * | P60438 | P0ABU0 | rl3_ecoli  | menb_ecoli |
| P25665 | METE_ECOLI | * | P21177 | P25665 | fadb_ecoli | mete_ecoli |
| P25665 | METE_ECOLI | * | P22256 | P25665 | gabt_ecoli | mete_ecoli |
| P25665 | METE_ECOLI | * | P0A6W5 | P25665 | grea_ecoli | mete_ecoli |
| P25665 | METE_ECOLI | * | P0A6H5 | P25665 | hslu_ecoli | mete_ecoli |
| P25665 | METE_ECOLI | * | P03018 | P25665 | uvrd_ecoli | mete_ecoli |
| P25665 | METE_ECOLI | * | P75616 | P25665 | yaax_ecoli | mete_ecoli |
| P25665 | METE_ECOLI | * | P0AF67 | P25665 | yjee_ecoli | mete_ecoli |
| P13009 | METH_ECOLI | * | P0AE78 | P13009 | corc_ecoli | meth_ecoli |
| P13009 | METH_ECOLI | * | P37313 | P13009 | dppf_ecoli | meth_ecoli |
| P13009 | METH_ECOLI | * | P06968 | P13009 | dut_ecoli  | meth_ecoli |
| P13009 | METH_ECOLI | * | P06988 | P13009 | hisx_ecoli | meth_ecoli |
| P13009 | METH_ECOLI | * | P77541 | P13009 | prpb_ecoli | meth_ecoli |
| P13009 | METH_ECOLI | * | P0A7H6 | P13009 | recr_ecoli | meth_ecoli |
| P13009 | METH_ECOLI | * | P0A8T7 | P13009 | rpoc_ecoli | meth_ecoli |
| P13009 | METH_ECOLI | * | P76121 | P13009 | yddh_ecoli | meth_ecoli |
| P13009 | METH_ECOLI | * | P16694 | P13009 | yjda_ecoli | meth_ecoli |
| P0A817 | METK_ECOLI | * | P36659 | P0A817 | cbpa_ecoli | metk_ecoli |
| P0A817 | METK_ECOLI | * | P07363 | P0A817 | chea_ecoli | metk_ecoli |

|        |            |   |        |        |             |            |
|--------|------------|---|--------|--------|-------------|------------|
| POA817 | METK_ECOLI | * | P0A6G7 | POA817 | clpp_ecoli  | metk_ecoli |
| POA817 | METK_ECOLI | * | P0A6H1 | POA817 | clpx_ecoli  | metk_ecoli |
| POA817 | METK_ECOLI | * | P08622 | POA817 | dnaj_ecoli  | metk_ecoli |
| POA817 | METK_ECOLI | * | P00582 | POA817 | dpo1_ecoli  | metk_ecoli |
| POA817 | METK_ECOLI | * | P0CE47 | POA817 | eftu1_ecoli | metk_ecoli |
| POA817 | METK_ECOLI | * | P0A6Q3 | POA817 | faba_ecoli  | metk_ecoli |
| POA817 | METK_ECOLI | * | P09372 | POA817 | grpe_ecoli  | metk_ecoli |
| POA817 | METK_ECOLI | * | P0AES4 | POA817 | gyra_ecoli  | metk_ecoli |
| POA817 | METK_ECOLI | * | P0AES6 | POA817 | gyrb_ecoli  | metk_ecoli |
| POA817 | METK_ECOLI | * | P0A6H5 | POA817 | hslu_ecoli  | metk_ecoli |
| POA817 | METK_ECOLI | * | P0C054 | POA817 | ibpa_ecoli  | metk_ecoli |
| POA817 | METK_ECOLI | * | P0C054 | POA817 | ibpa_ecoli  | metk_ecoli |
| POA817 | METK_ECOLI | * | P0A715 | POA817 | kdsa_ecoli  | metk_ecoli |
| POA817 | METK_ECOLI | * | P06993 | POA817 | malt_ecoli  | metk_ecoli |
| POA817 | METK_ECOLI | * | P05055 | POA817 | pnp_ecoli   | metk_ecoli |
| POA817 | METK_ECOLI | * | P36979 | POA817 | rlmn_ecoli  | metk_ecoli |
| POA817 | METK_ECOLI | * | P10408 | POA817 | seca_ecoli  | metk_ecoli |
| POA817 | METK_ECOLI | * | P0AGD7 | POA817 | srp54_ecoli | metk_ecoli |
|        |            |   |        |        |             |            |
| P28635 | METQ_ECOLI | * | P69908 | P28635 | dcea_ecoli  | metq_ecoli |
| P28635 | METQ_ECOLI | * | P69908 | P28635 | dcea_ecoli  | metq_ecoli |
|        |            |   |        |        |             |            |
| P30958 | MFD_ECOLI  | * | P23522 | P30958 | garl_ecoli  | mfd_ecoli  |
| P30958 | MFD_ECOLI  | * | P0A8V2 | P30958 | rpob_ecoli  | mfd_ecoli  |
| P30958 | MFD_ECOLI  | * | P0A8V2 | P30958 | rpob_ecoli  | mfd_ecoli  |
| P30958 | MFD_ECOLI  | * | P00579 | P30958 | rpod_ecoli  | mfd_ecoli  |
| P30958 | MFD_ECOLI  | * | P07395 | P30958 | syfb_ecoli  | mfd_ecoli  |
| P30958 | MFD_ECOLI  | * | P00944 | P30958 | xyla_ecoli  | mfd_ecoli  |
| P30958 | MFD_ECOLI  | * | P37757 | P30958 | ydde_ecoli  | mfd_ecoli  |
|        |            |   |        |        |             |            |
| POAEI1 | MIAB_ECOLI | * | P0ABE2 | POAEI1 | bola_ecoli  | miab_ecoli |
| POAEI1 | MIAB_ECOLI | * | P0A9X4 | POAEI1 | mreb_ecoli  | miab_ecoli |
| POAEI1 | MIAB_ECOLI | * | P37906 | POAEI1 | puub_ecoli  | miab_ecoli |
|        |            |   |        |        |             |            |
| P18196 | MINC_ECOLI | * | P00946 | P18196 | mana_ecoli  | minc_ecoli |
|        |            |   |        |        |             |            |
| POAEZ3 | MIND_ECOLI | * | P0A6F9 | POAEZ3 | ch10_ecoli  | mind_ecoli |
| POAEZ3 | MIND_ECOLI | * | P0A964 | POAEZ3 | chew_ecoli  | mind_ecoli |
| POAEZ3 | MIND_ECOLI | * | P45523 | POAEZ3 | fkba_ecoli  | mind_ecoli |
| POAEZ3 | MIND_ECOLI | * | P0ABX8 | POAEZ3 | flii_ecoli  | mind_ecoli |
| POAEZ3 | MIND_ECOLI | * | P0A9X4 | POAEZ3 | mreb_ecoli  | mind_ecoli |
| POAEZ3 | MIND_ECOLI | * | P10408 | POAEZ3 | seca_ecoli  | mind_ecoli |
| POAEZ3 | MIND_ECOLI | * | P37052 | POAEZ3 | ychj_ecoli  | mind_ecoli |
|        |            |   |        |        |             |            |
| POA734 | MINE_ECOLI | * | P24211 | POA734 | rhse_ecoli  | mine_ecoli |

|        |             |   |        |        |            |            |
|--------|-------------|---|--------|--------|------------|------------|
| P0A734 | MINE_ECOLI  | * | P52128 | P0A734 | yfjm_ecoli | mine_ecoli |
| P0A734 | MINE_ECOLI  | * | P75973 | P0A734 | ymfj_ecoli | mine_ecoli |
| P0A734 | MINE_ECOLI  | * | P76073 | P0A734 | ynae_ecoli | mine_ecoli |
| P0ADV7 | MLAC_ECOLI  |   | none   |        |            |            |
| P64604 | MLAD_ECOLI  |   | none   |        |            |            |
| P64606 | MLAE_ECOLI  |   | none   |        |            |            |
| Q47690 | MMUM_ECOLI  |   | none   |        |            |            |
| P54746 | MNGB_ECOLI  | * | P07330 | P54746 | cheb_ecoli | mngb_ecoli |
| P54746 | MNGB_ECOLI  | * | P23522 | P54746 | garl_ecoli | mngb_ecoli |
| P54746 | MNGB_ECOLI  | * | P19930 | P54746 | hyad_ecoli | mngb_ecoli |
| P54746 | MNGB_ECOLI  | * | P24175 | P54746 | manb_ecoli | mngb_ecoli |
| P54746 | MNGB_ECOLI  | * | P0A9H1 | P54746 | mug_ecoli  | mngb_ecoli |
| P54746 | MNGB_ECOLI  | * | P0C0L2 | P54746 | osmc_ecoli | mngb_ecoli |
| P54746 | MNGB_ECOLI  | * | Q46920 | P54746 | quef_ecoli | mngb_ecoli |
| P54746 | MNGB_ECOLI  | * | P0A890 | P54746 | tusa_ecoli | mngb_ecoli |
| P54746 | MNGB_ECOLI  | * | P37052 | P54746 | yhj_ecoli  | mngb_ecoli |
| P54746 | MNGB_ECOLI  | * | P64463 | P54746 | ydfz_ecoli | mngb_ecoli |
| P13669 | MNGR_ECOLI  |   | none   |        |            |            |
| P25745 | MNMA_ECOLI  |   | none   |        |            |            |
| P30745 | MOAA_ECOLI  | * | P30749 | P30745 | moae_ecoli | moaa_ecoli |
| P30745 | MOAA_ECOLI  | * | P21829 | P30745 | ybha_ecoli | moaa_ecoli |
| P0AEZ9 | MOAB_ECOLI  | * | P0AEE1 | P0AEZ9 | dcrb_ecoli | moab_ecoli |
| P0AEZ9 | MOAB_ECOLI  | * | P0A738 | P0AEZ9 | moac_ecoli | moab_ecoli |
| P08098 | MOBA1_ECOLX | * | P0ACB4 | P32173 | hemg_ecoli | moba_ecoli |
| P08098 | MOBA1_ECOLX | * | P32125 | P32173 | mobb_ecoli | moba_ecoli |
| P08098 | MOBA1_ECOLX | * | P12281 | P32173 | moea_ecoli | moba_ecoli |
| P08098 | MOBA1_ECOLX | * | P12281 | P32173 | moea_ecoli | moba_ecoli |
| P08098 | MOBA1_ECOLX | * | P12281 | P32173 | moea_ecoli | moba_ecoli |
| P08098 | MOBA1_ECOLX | * | P0AFW0 | P32173 | rfah_ecoli | moba_ecoli |
| P07112 | MOBA2_ECOLX |   |        |        |            |            |
| P12281 | MOEA_ECOLI  | * | P37595 | P12281 | iaaa_ecoli | moea_ecoli |
| P12281 | MOEA_ECOLI  | * | P32125 | P12281 | mobb_ecoli | moea_ecoli |
| P12281 | MOEA_ECOLI  | * | P12281 | P12281 | moea_ecoli | moea_ecoli |

|        |            |   |        |        |             |            |
|--------|------------|---|--------|--------|-------------|------------|
| P33345 | MOLR_ECOLI | * | P30750 | P33345 | metn_ecoli  | molr_ecoli |
| P33345 | MOLR_ECOLI | * | P0AG20 | P33345 | rela_ecoli  | molr_ecoli |
| P33345 | MOLR_ECOLI | * | P0A8R0 | P33345 | rraa_ecoli  | molr_ecoli |
| P33345 | MOLR_ECOLI | * | P0ADZ4 | P33345 | rs15_ecoli  | molr_ecoli |
| P33345 | MOLR_ECOLI | * | P0ACY1 | P33345 | ydja_ecoli  | molr_ecoli |
| P33345 | MOLR_ECOLI | * | P26646 | P33345 | yhdh_ecoli  | molr_ecoli |
| P33345 | MOLR_ECOLI | * | P75713 | P33345 | ylba_ecoli  | molr_ecoli |
| P37773 | MPL_ECOLI  | * | P0AEW6 | P37773 | ingk_ecoli  | mpl_ecoli  |
| P37773 | MPL_ECOLI  | * | P23256 | P37773 | maly_ecoli  | mpl_ecoli  |
| P37773 | MPL_ECOLI  | * | P0A8H6 | P37773 | yihi_ecoli  | mpl_ecoli  |
| P37773 | MPL_ECOLI  | * | P0AF90 | P37773 | yjgd_ecoli  | mpl_ecoli  |
| P0ACR9 | MPRA_ECOLI | * | P0AE76 | P0ACR9 | cobu_ecoli  | mpra_ecoli |
| P22186 | MRAZ_ECOLI | * | P22186 | P22186 | mraz_ecoli  | mraz_ecoli |
| P22186 | MRAZ_ECOLI | * | P31806 | P22186 | yjef_ecoli  | mraz_ecoli |
| P22186 | MRAZ_ECOLI | * | P31806 | P22186 | yjef_ecoli  | mraz_ecoli |
| P0A9X4 | MREB_ECOLI | * | P0A6F9 | P0A9X4 | ch10_ecoli  | mreb_ecoli |
| P0A9X4 | MREB_ECOLI | * | P0A964 | P0A9X4 | chew_ecoli  | mreb_ecoli |
| P0A9X4 | MREB_ECOLI | * | P0A6H1 | P0A9X4 | clpx_ecoli  | mreb_ecoli |
| P0A9X4 | MREB_ECOLI | * | P08622 | P0A9X4 | dnaj_ecoli  | mreb_ecoli |
| P0A9X4 | MREB_ECOLI | * | P77488 | P0A9X4 | dxs_ecoli   | mreb_ecoli |
| P0A9X4 | MREB_ECOLI | * | P0CE47 | P0A9X4 | eftu1_ecoli | mreb_ecoli |
| P0A9X4 | MREB_ECOLI | * | P0ACC3 | P0A9X4 | erpa_ecoli  | mreb_ecoli |
| P0A9X4 | MREB_ECOLI | * | P0AEM0 | P0A9X4 | fkbx_ecoli  | mreb_ecoli |
| P0A9X4 | MREB_ECOLI | * | P0ABH0 | P0A9X4 | ftsa_ecoli  | mreb_ecoli |
| P0A9X4 | MREB_ECOLI | * | P0A9A6 | P0A9X4 | ftsz_ecoli  | mreb_ecoli |
| P0A9X4 | MREB_ECOLI | * | P68688 | P0A9X4 | glrx1_ecoli | mreb_ecoli |
| P0A9X4 | MREB_ECOLI | * | P0AC69 | P0A9X4 | glrx4_ecoli | mreb_ecoli |
| P0A9X4 | MREB_ECOLI | * | P0AES4 | P0A9X4 | gyra_ecoli  | mreb_ecoli |
| P0A9X4 | MREB_ECOLI | * | P0A6H5 | P0A9X4 | hslu_ecoli  | mreb_ecoli |
| P0A9X4 | MREB_ECOLI | * | P0C054 | P0A9X4 | ibpa_ecoli  | mreb_ecoli |
| P0A9X4 | MREB_ECOLI | * | P0C058 | P0A9X4 | ibpb_ecoli  | mreb_ecoli |
| P0A9X4 | MREB_ECOLI | * | P10441 | P0A9X4 | lpxb_ecoli  | mreb_ecoli |
| P0A9X4 | MREB_ECOLI | * | P06993 | P0A9X4 | malt_ecoli  | mreb_ecoli |
| P0A9X4 | MREB_ECOLI | * | P0A817 | P0A9X4 | metk_ecoli  | mreb_ecoli |
| P0A9X4 | MREB_ECOLI | * | P0AEI1 | P0A9X4 | miab_ecoli  | mreb_ecoli |
| P0A9X4 | MREB_ECOLI | * | P09152 | P0A9X4 | narg_ecoli  | mreb_ecoli |
| P0A9X4 | MREB_ECOLI | * | P0AFG0 | P0A9X4 | nusg_ecoli  | mreb_ecoli |
| P0A9X4 | MREB_ECOLI | * | P0AFG6 | P0A9X4 | odo2_ecoli  | mreb_ecoli |
| P0A9X4 | MREB_ECOLI | * | A8A6G7 | P0A9X4 | oxaa_ecohs  | mreb_ecoli |
| P0A9X4 | MREB_ECOLI | * | P0AFI2 | P0A9X4 | parc_ecoli  | mreb_ecoli |



|        |            |          |        |                            |                            |
|--------|------------|----------|--------|----------------------------|----------------------------|
| P0A9X4 | MREB_ECOLI | * P05055 | P0A9X4 | <a href="#">pnp_ecoli</a>  | <a href="#">mreb_ecoli</a> |
| P0A9X4 | MREB_ECOLI | * P42184 | P0A9X4 | <a href="#">prsa_ecolx</a> | <a href="#">mreb_ecoli</a> |
| P0A9X4 | MREB_ECOLI | * P0AAH0 | P0A9X4 | <a href="#">pstb_ecoli</a> | <a href="#">mreb_ecoli</a> |
| P0A9X4 | MREB_ECOLI | * P15032 | P0A9X4 | <a href="#">rece_ecoli</a> | <a href="#">mreb_ecoli</a> |
| P0A9X4 | MREB_ECOLI | * P00452 | P0A9X4 | <a href="#">rir1_ecoli</a> | <a href="#">mreb_ecoli</a> |
| P0A9X4 | MREB_ECOLI | * P69924 | P0A9X4 | <a href="#">rir2_ecoli</a> | <a href="#">mreb_ecoli</a> |
| P0A9X4 | MREB_ECOLI | * P36979 | P0A9X4 | <a href="#">rlmn_ecoli</a> | <a href="#">mreb_ecoli</a> |
| P0A9X4 | MREB_ECOLI | * P0CG19 | P0A9X4 | <a href="#">rnph_ecoli</a> | <a href="#">mreb_ecoli</a> |
| P0A9X4 | MREB_ECOLI | * P0A7Z4 | P0A9X4 | <a href="#">rpoa_ecoli</a> | <a href="#">mreb_ecoli</a> |
| P0A9X4 | MREB_ECOLI | * P10408 | P0A9X4 | <a href="#">seca_ecoli</a> | <a href="#">mreb_ecoli</a> |
| P0A9X4 | MREB_ECOLI | * P0AA25 | P0A9X4 | <a href="#">thio_ecoli</a> | <a href="#">mreb_ecoli</a> |
| P0A9X4 | MREB_ECOLI | * P0A850 | P0A9X4 | <a href="#">tig_ecoli</a>  | <a href="#">mreb_ecoli</a> |
| P0A9X4 | MREB_ECOLI | * P0A8E5 | P0A9X4 | <a href="#">yacl_ecoli</a> | <a href="#">mreb_ecoli</a> |
| P0A9X4 | MREB_ECOLI | * P39165 | P0A9X4 | <a href="#">ycho_ecoli</a> | <a href="#">mreb_ecoli</a> |
| P0A9X4 | MREB_ECOLI | * P77721 | P0A9X4 | <a href="#">ydjf_ecoli</a> | <a href="#">mreb_ecoli</a> |
| P0A9X4 | MREB_ECOLI | * P64483 | P0A9X4 | <a href="#">yeak_ecoli</a> | <a href="#">mreb_ecoli</a> |
| P0A9X4 | MREB_ECOLI | * P76241 | P0A9X4 | <a href="#">yeam_ecoli</a> | <a href="#">mreb_ecoli</a> |
| P16926 | MREC_ECOLI | * P15042 | P16926 | <a href="#">dnlj_ecoli</a> | <a href="#">mrec_ecoli</a> |
| P16926 | MREC_ECOLI | * P67701 | P16926 | <a href="#">ygjm_ecoli</a> | <a href="#">mrec_ecoli</a> |
| P0AF08 | MRP_ECOLI  | * P63020 | P0AF08 | <a href="#">nfua_ecoli</a> | <a href="#">mrp_ecoli</a>  |
| P24202 | MRR_ECOLI  | * P11663 | P24202 | <a href="#">yggd_ecoli</a> | <a href="#">mrr_ecoli</a>  |
| P24205 | MSBB_ECOLI | * P0C054 | P24205 | <a href="#">ibpa_ecoli</a> | <a href="#">msbb_ecoli</a> |
| P0C0S1 | MSCS_ECOLI | * P31120 | P0C0S1 | <a href="#">glmm_ecoli</a> | <a href="#">mscs_ecoli</a> |
| P0A744 | MSRA_ECOLI | * P0A7A9 | P0A744 | <a href="#">ipyr_ecoli</a> | <a href="#">msra_ecoli</a> |
| P0A744 | MSRA_ECOLI | * P0AAC8 | P0A744 | <a href="#">isca_ecoli</a> | <a href="#">msra_ecoli</a> |
| P09424 | MTLD_ECOLI | * P30130 | P09424 | <a href="#">fimd_ecoli</a> | <a href="#">mtld_ecoli</a> |
| P09424 | MTLD_ECOLI | * P21893 | P09424 | <a href="#">recj_ecoli</a> | <a href="#">mtld_ecoli</a> |
| P09424 | MTLD_ECOLI | * P0A821 | P09424 | <a href="#">sela_ecoli</a> | <a href="#">mtld_ecoli</a> |
| P09424 | MTLD_ECOLI | * P77515 | P09424 | <a href="#">stfq_ecoli</a> | <a href="#">mtld_ecoli</a> |
| P09424 | MTLD_ECOLI | * P0AB06 | P09424 | <a href="#">ycbk_ecoli</a> | <a href="#">mtld_ecoli</a> |
| P09424 | MTLD_ECOLI | * P77561 | P09424 | <a href="#">ydep_ecoli</a> | <a href="#">mtld_ecoli</a> |
| P09424 | MTLD_ECOLI | * P77260 | P09424 | <a href="#">ydfi_ecoli</a> | <a href="#">mtld_ecoli</a> |
| P0AF12 | MTNN_ECOLI | * P39362 | P0AF12 | <a href="#">sgce_ecoli</a> | <a href="#">mtnn_ecoli</a> |
| P40874 | MTOX_ECOLI | * P05020 | P40874 | <a href="#">pyrc_ecoli</a> | <a href="#">mtox_ecoli</a> |
| P22524 | MUKE_ECOLI | * P06961 | P22524 | <a href="#">cca_ecoli</a>  | <a href="#">muke_ecoli</a> |

|        |            |   |        |        |             |            |
|--------|------------|---|--------|--------|-------------|------------|
| P22524 | MUKE_ECOLI | * | P22523 | P22524 | mukb_ecoli  | muke_ecoli |
| P22524 | MUKE_ECOLI | * | P22523 | P22524 | mukb_ecoli  | muke_ecoli |
| P0A749 | MURA_ECOLI |   | none   |        |             |            |
| P23909 | MUTS_ECOLI | * | P07330 | P23909 | cheb_ecoli  | muts_ecoli |
| P23909 | MUTS_ECOLI | * | P52613 | P23909 | flij_ecoli  | muts_ecoli |
| P23909 | MUTS_ECOLI | * | P21599 | P23909 | kpyk2_ecoli | muts_ecoli |
| P23909 | MUTS_ECOLI | * | P23909 | P23909 | muts_ecoli  | muts_ecoli |
| P23909 | MUTS_ECOLI | * | P41409 | P23909 | riha_ecoli  | muts_ecoli |
| P23909 | MUTS_ECOLI | * | P0AD05 | P23909 | yeca_ecoli  | muts_ecoli |
| P08337 | MUTT_ECOLI | * | P19926 | P08337 | agp_ecoli   | mutt_ecoli |
| P08337 | MUTT_ECOLI | * | P33225 | P08337 | tora_ecoli  | mutt_ecoli |
| P18843 | NADE_ECOLI | * | P04395 | P18843 | 3mg2_ecoli  | nade_ecoli |
| P18843 | NADE_ECOLI | * | P00350 | P18843 | 6pgd_ecoli  | nade_ecoli |
| P18843 | NADE_ECOLI | * | P52697 | P18843 | 6pgl_ecoli  | nade_ecoli |
| P18843 | NADE_ECOLI | * | P00509 | P18843 | aat_ecoli   | nade_ecoli |
| P18843 | NADE_ECOLI | * | P24182 | P18843 | acc_c_ecoli | nade_ecoli |
| P18843 | NADE_ECOLI | * | P77580 | P18843 | acd_h_ecoli | nade_ecoli |
| P18843 | NADE_ECOLI | * | P25516 | P18843 | acon1_ecoli | nade_ecoli |
| P18843 | NADE_ECOLI | * | P27550 | P18843 | acs_a_ecoli | nade_ecoli |
| P18843 | NADE_ECOLI | * | P31441 | P18843 | adec_ecoli  | nade_ecoli |
| P18843 | NADE_ECOLI | * | P0A9Q7 | P18843 | adhe_ecoli  | nade_ecoli |
| P18843 | NADE_ECOLI | * | P23872 | P18843 | aes_ecoli   | nade_ecoli |
| P18843 | NADE_ECOLI | * | P06720 | P18843 | agal_ecoli  | nade_ecoli |
| P18843 | NADE_ECOLI | * | P42907 | P18843 | agas_ecoli  | nade_ecoli |
| P18843 | NADE_ECOLI | * | P77671 | P18843 | all_b_ecoli | nade_ecoli |
| P18843 | NADE_ECOLI | * | P77425 | P18843 | all_c_ecoli | nade_ecoli |
| P18843 | NADE_ECOLI | * | P77555 | P18843 | all_d_ecoli | nade_ecoli |
| P18843 | NADE_ECOLI | * | P36548 | P18843 | amia_ecoli  | nade_ecoli |
| P18843 | NADE_ECOLI | * | P15034 | P18843 | ampp_ecoli  | nade_ecoli |
| P18843 | NADE_ECOLI | * | P77570 | P18843 | anmk_ecoli  | nade_ecoli |
| P18843 | NADE_ECOLI | * | P05052 | P18843 | appy_ecoli  | nade_ecoli |
| P18843 | NADE_ECOLI | * | P08204 | P18843 | arab_ecoli  | nade_ecoli |
| P18843 | NADE_ECOLI | * | P02924 | P18843 | araf_ecoli  | nade_ecoli |
| P18843 | NADE_ECOLI | * | P37306 | P18843 | arcc_ecoli  | nade_ecoli |
| P18843 | NADE_ECOLI | * | P77624 | P18843 | arcm_ecoli  | nade_ecoli |
| P18843 | NADE_ECOLI | * | P0A6D3 | P18843 | aroa_ecoli  | nade_ecoli |
| P18843 | NADE_ECOLI | * | P15770 | P18843 | aroe_ecoli  | nade_ecoli |
| P18843 | NADE_ECOLI | * | P0AB91 | P18843 | arog_ecoli  | nade_ecoli |
| P18843 | NADE_ECOLI | * | P00887 | P18843 | aroh_ecoli  | nade_ecoli |
| P18843 | NADE_ECOLI | * | P0AB96 | P18843 | arsc_ecoli  | nade_ecoli |
| P18843 | NADE_ECOLI | * | P0AAF6 | P18843 | artp_ecoli  | nade_ecoli |
| P18843 | NADE_ECOLI | * | P22106 | P18843 | asnb_ecoli  | nade_ecoli |

|        |            |          |        |            |            |
|--------|------------|----------|--------|------------|------------|
| P18843 | NADE_ECOLI | * P0AC38 | P18843 | aspa_ecoli | nade_ecoli |
| P18843 | NADE_ECOLI | * P0AE37 | P18843 | asta_ecoli | nade_ecoli |
| P18843 | NADE_ECOLI | * Q06065 | P18843 | atoc_ecoli | nade_ecoli |
| P18843 | NADE_ECOLI | * P69228 | P18843 | baer_ecoli | nade_ecoli |
| P18843 | NADE_ECOLI | * P0AE52 | P18843 | bcp_ecoli  | nade_ecoli |
| P18843 | NADE_ECOLI | * P17446 | P18843 | beti_ecoli | nade_ecoli |
| P18843 | NADE_ECOLI | * Q46829 | P18843 | bgla_ecoli | nade_ecoli |
| P18843 | NADE_ECOLI | * P05804 | P18843 | bglr_ecoli | nade_ecoli |
| P18843 | NADE_ECOLI | * P12996 | P18843 | biob_ecoli | nade_ecoli |
| P18843 | NADE_ECOLI | * P12998 | P18843 | biof_ecoli | nade_ecoli |
| P18843 | NADE_ECOLI | * P06610 | P18843 | btue_ecoli | nade_ecoli |
| P18843 | NADE_ECOLI | * P77213 | P18843 | caal_ecoli | nade_ecoli |
| P18843 | NADE_ECOLI | * P61517 | P18843 | can_ecoli  | nade_ecoli |
| P18843 | NADE_ECOLI | * P36659 | P18843 | cbpa_ecoli | nade_ecoli |
| P18843 | NADE_ECOLI | * P31469 | P18843 | cbrc_ecoli | nade_ecoli |
| P18843 | NADE_ECOLI | * P06961 | P18843 | cca_ecoli  | nade_ecoli |
| P18843 | NADE_ECOLI | * P0A6F9 | P18843 | ch10_ecoli | nade_ecoli |
| P18843 | NADE_ECOLI | * P07363 | P18843 | chea_ecoli | nade_ecoli |
| P18843 | NADE_ECOLI | * P07330 | P18843 | cheb_ecoli | nade_ecoli |
| P18843 | NADE_ECOLI | * P0A964 | P18843 | chew_ecoli | nade_ecoli |
| P18843 | NADE_ECOLI | * P0AE67 | P18843 | chey_ecoli | nade_ecoli |
| P18843 | NADE_ECOLI | * P0ABH7 | P18843 | cisy_ecoli | nade_ecoli |
| P18843 | NADE_ECOLI | * P0ABH9 | P18843 | clpa_ecoli | nade_ecoli |
| P18843 | NADE_ECOLI | * P63284 | P18843 | clpb_ecoli | nade_ecoli |
| P18843 | NADE_ECOLI | * P0A8Q6 | P18843 | clps_ecoli | nade_ecoli |
| P18843 | NADE_ECOLI | * P0A6H1 | P18843 | clpx_ecoli | nade_ecoli |
| P18843 | NADE_ECOLI | * P76291 | P18843 | cmob_ecoli | nade_ecoli |
| P18843 | NADE_ECOLI | * P25524 | P18843 | coda_ecoli | nade_ecoli |
| P18843 | NADE_ECOLI | * P0AE78 | P18843 | corc_ecoli | nade_ecoli |
| P18843 | NADE_ECOLI | * Q46925 | P18843 | csda_ecoli | nade_ecoli |
| P18843 | NADE_ECOLI | * P36995 | P18843 | cspb_ecoli | nade_ecoli |
| P18843 | NADE_ECOLI | * P0A9Y6 | P18843 | cspc_ecoli | nade_ecoli |
| P18843 | NADE_ECOLI | * P0A986 | P18843 | cspi_ecoli | nade_ecoli |
| P18843 | NADE_ECOLI | * P0ACZ8 | P18843 | cusr_ecoli | nade_ecoli |
| P18843 | NADE_ECOLI | * P69488 | P18843 | cuta_ecoli | nade_ecoli |
| P18843 | NADE_ECOLI | * P0A9D4 | P18843 | cyse_ecoli | nade_ecoli |
| P18843 | NADE_ECOLI | * P0AEA8 | P18843 | cysg_ecoli | nade_ecoli |
| P18843 | NADE_ECOLI | * P0ABK5 | P18843 | cysk_ecoli | nade_ecoli |
| P18843 | NADE_ECOLI | * P16703 | P18843 | cysm_ecoli | nade_ecoli |
| P18843 | NADE_ECOLI | * P0A6L2 | P18843 | dapa_ecoli | nade_ecoli |
| P18843 | NADE_ECOLI | * P0ACF4 | P18843 | dbhb_ecoli | nade_ecoli |
| P18843 | NADE_ECOLI | * P24169 | P18843 | dcos_ecoli | nade_ecoli |
| P18843 | NADE_ECOLI | * P0A6J8 | P18843 | ddla_ecoli | nade_ecoli |
| P18843 | NADE_ECOLI | * P77268 | P18843 | ddpd_ecoli | nade_ecoli |
| P18843 | NADE_ECOLI | * P0A6L0 | P18843 | deoc_ecoli | nade_ecoli |

|        |            |          |        |            |            |
|--------|------------|----------|--------|------------|------------|
| P18843 | NADE_ECOLI | * P0AEE5 | P18843 | dgal_ecoli | nade_ecoli |
| P18843 | NADE_ECOLI | * P0AC41 | P18843 | dhsa_ecoli | nade_ecoli |
| P18843 | NADE_ECOLI | * P23840 | P18843 | dind_ecoli | nade_ecoli |
| P18843 | NADE_ECOLI | * P27296 | P18843 | ding_ecoli | nade_ecoli |
| P18843 | NADE_ECOLI | * P18776 | P18843 | dmsb_ecoli | nade_ecoli |
| P18843 | NADE_ECOLI | * P03004 | P18843 | dnaa_ecoli | nade_ecoli |
| P18843 | NADE_ECOLI | * P0AEG6 | P18843 | dsbc_ecoli | nade_ecoli |
| P18843 | NADE_ECOLI | * P0ADF6 | P18843 | edd_ecoli  | nade_ecoli |
| P18843 | NADE_ECOLI | * P0A6M8 | P18843 | efg_ecoli  | nade_ecoli |
| P18843 | NADE_ECOLI | * P50465 | P18843 | end8_ecoli | nade_ecoli |
| P18843 | NADE_ECOLI | * P0A6P9 | P18843 | eno_ecoli  | nade_ecoli |
| P18843 | NADE_ECOLI | * P0ADI4 | P18843 | entb_ecoli | nade_ecoli |
| P18843 | NADE_ECOLI | * P0AEJ2 | P18843 | entc_ecoli | nade_ecoli |
| P18843 | NADE_ECOLI | * P10378 | P18843 | ente_ecoli | nade_ecoli |
| P18843 | NADE_ECOLI | * P19636 | P18843 | eutc_ecoli | nade_ecoli |
| P18843 | NADE_ECOLI | * P77218 | P18843 | eutd_ecoli | nade_ecoli |
| P18843 | NADE_ECOLI | * P0AAI9 | P18843 | fabd_ecoli | nade_ecoli |
| P18843 | NADE_ECOLI | * P0A6R0 | P18843 | fabh_ecoli | nade_ecoli |
| P18843 | NADE_ECOLI | * P21177 | P18843 | fadb_ecoli | nade_ecoli |
| P18843 | NADE_ECOLI | * P69902 | P18843 | fcta_ecoli | nade_ecoli |
| P18843 | NADE_ECOLI | * P13024 | P18843 | fdhe_ecoli | nade_ecoli |
| P18843 | NADE_ECOLI | * P32176 | P18843 | fdog_ecoli | nade_ecoli |
| P18843 | NADE_ECOLI | * P28861 | P18843 | fenr_ecoli | nade_ecoli |
| P18843 | NADE_ECOLI | * P0AEL6 | P18843 | fepb_ecoli | nade_ecoli |
| P18843 | NADE_ECOLI | * P23878 | P18843 | fepc_ecoli | nade_ecoli |
| P18843 | NADE_ECOLI | * P60566 | P18843 | fixa_ecoli | nade_ecoli |
| P18843 | NADE_ECOLI | * P68646 | P18843 | fixx_ecoli | nade_ecoli |
| P18843 | NADE_ECOLI | * P0ABY4 | P18843 | flaw_ecoli | nade_ecoli |
| P18843 | NADE_ECOLI | * P0ABW9 | P18843 | flgb_ecoli | nade_ecoli |
| P18843 | NADE_ECOLI | * P75937 | P18843 | flge_ecoli | nade_ecoli |
| P18843 | NADE_ECOLI | * P75938 | P18843 | flgf_ecoli | nade_ecoli |
| P18843 | NADE_ECOLI | * P0ABX5 | P18843 | flgg_ecoli | nade_ecoli |
| P18843 | NADE_ECOLI | * P0A8S9 | P18843 | flhd_ecoli | nade_ecoli |
| P18843 | NADE_ECOLI | * P04949 | P18843 | flic_ecoli | nade_ecoli |
| P18843 | NADE_ECOLI | * P0ABZ1 | P18843 | flig_ecoli | nade_ecoli |
| P18843 | NADE_ECOLI | * P52613 | P18843 | flij_ecoli | nade_ecoli |
| P18843 | NADE_ECOLI | * P52614 | P18843 | flik_ecoli | nade_ecoli |
| P18843 | NADE_ECOLI | * P26608 | P18843 | flis_ecoli | nade_ecoli |
| P18843 | NADE_ECOLI | * P77609 | P18843 | flxa_ecoli | nade_ecoli |
| P18843 | NADE_ECOLI | * P0A9E5 | P18843 | fnr_ecoli  | nade_ecoli |
| P18843 | NADE_ECOLI | * P08192 | P18843 | folc_ecoli | nade_ecoli |
| P18843 | NADE_ECOLI | * P24186 | P18843 | fold_ecoli | nade_ecoli |
| P18843 | NADE_ECOLI | * P0AEN1 | P18843 | fre_ecoli  | nade_ecoli |
| P18843 | NADE_ECOLI | * P45543 | P18843 | frld_ecoli | nade_ecoli |
| P18843 | NADE_ECOLI | * P0ACP1 | P18843 | frur_ecoli | nade_ecoli |

|        |            |          |        |             |            |
|--------|------------|----------|--------|-------------|------------|
| P18843 | NADE_ECOLI | * P0A9A2 | P18843 | ftnb_ecoli  | nade_ecoli |
| P18843 | NADE_ECOLI | * P0A9S1 | P18843 | fuco_ecoli  | nade_ecoli |
| P18843 | NADE_ECOLI | * P0AC33 | P18843 | fuma_ecoli  | nade_ecoli |
| P18843 | NADE_ECOLI | * P0A9A9 | P18843 | fur_ecoli   | nade_ecoli |
| P18843 | NADE_ECOLI | * P22256 | P18843 | gabt_ecoli  | nade_ecoli |
| P18843 | NADE_ECOLI | * P09148 | P18843 | gal7_ecoli  | nade_ecoli |
| P18843 | NADE_ECOLI | * P09147 | P18843 | gale_ecoli  | nade_ecoli |
| P18843 | NADE_ECOLI | * P0AAB6 | P18843 | galf_ecoli  | nade_ecoli |
| P18843 | NADE_ECOLI | * P0A9C3 | P18843 | galm_ecoli  | nade_ecoli |
| P18843 | NADE_ECOLI | * P23522 | P18843 | garl_ecoli  | nade_ecoli |
| P18843 | NADE_ECOLI | * P0A9S3 | P18843 | gatd_ecoli  | nade_ecoli |
| P18843 | NADE_ECOLI | * P36930 | P18843 | gatr_ecoli  | nade_ecoli |
| P18843 | NADE_ECOLI | * P33195 | P18843 | gcsp_ecoli  | nade_ecoli |
| P18843 | NADE_ECOLI | * P37747 | P18843 | glf_ecoli   | nade_ecoli |
| P18843 | NADE_ECOLI | * P0A6V8 | P18843 | glk_ecoli   | nade_ecoli |
| P18843 | NADE_ECOLI | * P0A9Z1 | P18843 | glnb_ecoli  | nade_ecoli |
| P18843 | NADE_ECOLI | * P27249 | P18843 | glnD_ecoli  | nade_ecoli |
| P18843 | NADE_ECOLI | * P13035 | P18843 | glpd_ecoli  | nade_ecoli |
| P18843 | NADE_ECOLI | * P0A9C9 | P18843 | glpx_ecoli  | nade_ecoli |
| P18843 | NADE_ECOLI | * P68688 | P18843 | glrx1_ecoli | nade_ecoli |
| P18843 | NADE_ECOLI | * P0AC69 | P18843 | glrx4_ecoli | nade_ecoli |
| P18843 | NADE_ECOLI | * P77161 | P18843 | glxr_ecoli  | nade_ecoli |
| P18843 | NADE_ECOLI | * P0A6S7 | P18843 | gpda_ecoli  | nade_ecoli |
| P18843 | NADE_ECOLI | * P32662 | P18843 | gph_ecoli   | nade_ecoli |
| P18843 | NADE_ECOLI | * P62707 | P18843 | gpma_ecoli  | nade_ecoli |
| P18843 | NADE_ECOLI | * P37689 | P18843 | gpmi_ecoli  | nade_ecoli |
| P18843 | NADE_ECOLI | * P0A6W5 | P18843 | grea_ecoli  | nade_ecoli |
| P18843 | NADE_ECOLI | * P30128 | P18843 | greb_ecoli  | nade_ecoli |
| P18843 | NADE_ECOLI | * P09372 | P18843 | grpe_ecoli  | nade_ecoli |
| P18843 | NADE_ECOLI | * P04425 | P18843 | gshb_ecoli  | nade_ecoli |
| P18843 | NADE_ECOLI | * P06715 | P18843 | gshr_ecoli  | nade_ecoli |
| P18843 | NADE_ECOLI | * P0AES0 | P18843 | gsp_ecoli   | nade_ecoli |
| P18843 | NADE_ECOLI | * P04079 | P18843 | guaa_ecoli  | nade_ecoli |
| P18843 | NADE_ECOLI | * P0AES2 | P18843 | gudh_ecoli  | nade_ecoli |
| P18843 | NADE_ECOLI | * P77650 | P18843 | hcad_ecoli  | nade_ecoli |
| P18843 | NADE_ECOLI | * P31658 | P18843 | hcha_ecoli  | nade_ecoli |
| P18843 | NADE_ECOLI | * P36553 | P18843 | hem6_ecoli  | nade_ecoli |
| P18843 | NADE_ECOLI | * P0ACE7 | P18843 | hint_ecoli  | nade_ecoli |
| P18843 | NADE_ECOLI | * P24232 | P18843 | hmp_ecoli   | nade_ecoli |
| P18843 | NADE_ECOLI | * P28631 | P18843 | holb_ecoli  | nade_ecoli |
| P18843 | NADE_ECOLI | * P0ABS8 | P18843 | hole_ecoli  | nade_ecoli |
| P18843 | NADE_ECOLI | * P19931 | P18843 | hyae_ecoli  | nade_ecoli |
| P18843 | NADE_ECOLI | * P19932 | P18843 | hyaf_ecoli  | nade_ecoli |
| P18843 | NADE_ECOLI | * P30147 | P18843 | hyi_ecoli   | nade_ecoli |
| P18843 | NADE_ECOLI | * P08200 | P18843 | idh_ecoli   | nade_ecoli |

|        |            |          |        |                             |                            |
|--------|------------|----------|--------|-----------------------------|----------------------------|
| P18843 | NADE_ECOLI | * P69222 | P18843 | <a href="#">if1_ecoli</a>   | <a href="#">nade_ecoli</a> |
| P18843 | NADE_ECOLI | * P0A6X7 | P18843 | <a href="#">ihfa_ecoli</a>  | <a href="#">nade_ecoli</a> |
| P18843 | NADE_ECOLI | * P0AEW6 | P18843 | <a href="#">ingk_ecoli</a>  | <a href="#">nade_ecoli</a> |
| P18843 | NADE_ECOLI | * P0AAN9 | P18843 | <a href="#">irap_ecoli</a>  | <a href="#">nade_ecoli</a> |
| P18843 | NADE_ECOLI | * P0A6B7 | P18843 | <a href="#">iscs_ecoli</a>  | <a href="#">nade_ecoli</a> |
| P18843 | NADE_ECOLI | * P13029 | P18843 | <a href="#">katg_ecoli</a>  | <a href="#">nade_ecoli</a> |
| P18843 | NADE_ECOLI | * P0AB74 | P18843 | <a href="#">kbay_ecoli</a>  | <a href="#">nade_ecoli</a> |
| P18843 | NADE_ECOLI | * P0A6I0 | P18843 | <a href="#">kcy_ecoli</a>   | <a href="#">nade_ecoli</a> |
| P18843 | NADE_ECOLI | * P04951 | P18843 | <a href="#">kdsb_ecoli</a>  | <a href="#">nade_ecoli</a> |
| P18843 | NADE_ECOLI | * Q46938 | P18843 | <a href="#">kdui_ecoli</a>  | <a href="#">nade_ecoli</a> |
| P18843 | NADE_ECOLI | * P0AD61 | P18843 | <a href="#">kpyk1_ecoli</a> | <a href="#">nade_ecoli</a> |
| P18843 | NADE_ECOLI | * P52643 | P18843 | <a href="#">ldhd_ecoli</a>  | <a href="#">nade_ecoli</a> |
| P18843 | NADE_ECOLI | * P09151 | P18843 | <a href="#">leu1_ecoli</a>  | <a href="#">nade_ecoli</a> |
| P18843 | NADE_ECOLI | * P60716 | P18843 | <a href="#">lipa_ecoli</a>  | <a href="#">nade_ecoli</a> |
| P18843 | NADE_ECOLI | * P0A9M0 | P18843 | <a href="#">lon_ecoli</a>   | <a href="#">nade_ecoli</a> |
| P18843 | NADE_ECOLI | * P0ADV9 | P18843 | <a href="#">lptc_ecoli</a>  | <a href="#">nade_ecoli</a> |
| P18843 | NADE_ECOLI | * P0ACJ0 | P18843 | <a href="#">lrp_ecoli</a>   | <a href="#">nade_ecoli</a> |
| P18843 | NADE_ECOLI | * P64461 | P18843 | <a href="#">lsrg_ecoli</a>  | <a href="#">nade_ecoli</a> |
| P18843 | NADE_ECOLI | * P77432 | P18843 | <a href="#">lsrk_ecoli</a>  | <a href="#">nade_ecoli</a> |
| P18843 | NADE_ECOLI | * P75823 | P18843 | <a href="#">ltae_ecoli</a>  | <a href="#">nade_ecoli</a> |
| P18843 | NADE_ECOLI | * P00946 | P18843 | <a href="#">mana_ecoli</a>  | <a href="#">nade_ecoli</a> |
| P18843 | NADE_ECOLI | * P24175 | P18843 | <a href="#">manb_ecoli</a>  | <a href="#">nade_ecoli</a> |
| P18843 | NADE_ECOLI | * P76558 | P18843 | <a href="#">mao2_ecoli</a>  | <a href="#">nade_ecoli</a> |
| P18843 | NADE_ECOLI | * P0ACE0 | P18843 | <a href="#">mbhm_ecoli</a>  | <a href="#">nade_ecoli</a> |
| P18843 | NADE_ECOLI | * P69741 | P18843 | <a href="#">mbht_ecoli</a>  | <a href="#">nade_ecoli</a> |
| P18843 | NADE_ECOLI | * P0ABU0 | P18843 | <a href="#">menb_ecoli</a>  | <a href="#">nade_ecoli</a> |
| P18843 | NADE_ECOLI | * P29208 | P18843 | <a href="#">menc_ecoli</a>  | <a href="#">nade_ecoli</a> |
| P18843 | NADE_ECOLI | * P37353 | P18843 | <a href="#">mene_ecoli</a>  | <a href="#">nade_ecoli</a> |
| P18843 | NADE_ECOLI | * P38051 | P18843 | <a href="#">menf_ecoli</a>  | <a href="#">nade_ecoli</a> |
| P18843 | NADE_ECOLI | * P00935 | P18843 | <a href="#">metb_ecoli</a>  | <a href="#">nade_ecoli</a> |
| P18843 | NADE_ECOLI | * P0A817 | P18843 | <a href="#">metk_ecoli</a>  | <a href="#">nade_ecoli</a> |
| P18843 | NADE_ECOLI | * P0ABR9 | P18843 | <a href="#">mhpb_ecoli</a>  | <a href="#">nade_ecoli</a> |
| P18843 | NADE_ECOLI | * P77608 | P18843 | <a href="#">mhpd_ecoli</a>  | <a href="#">nade_ecoli</a> |
| P18843 | NADE_ECOLI | * P0A734 | P18843 | <a href="#">mine_ecoli</a>  | <a href="#">nade_ecoli</a> |
| P18843 | NADE_ECOLI | * P28224 | P18843 | <a href="#">mlic_ecoli</a>  | <a href="#">nade_ecoli</a> |
| P18843 | NADE_ECOLI | * Q47690 | P18843 | <a href="#">mmum_ecoli</a>  | <a href="#">nade_ecoli</a> |
| P18843 | NADE_ECOLI | * P25745 | P18843 | <a href="#">mnma_ecoli</a>  | <a href="#">nade_ecoli</a> |
| P18843 | NADE_ECOLI | * P30745 | P18843 | <a href="#">moaa_ecoli</a>  | <a href="#">nade_ecoli</a> |
| P18843 | NADE_ECOLI | * P0A738 | P18843 | <a href="#">moac_ecoli</a>  | <a href="#">nade_ecoli</a> |
| P18843 | NADE_ECOLI | * P30748 | P18843 | <a href="#">moad_ecoli</a>  | <a href="#">nade_ecoli</a> |
| P18843 | NADE_ECOLI | * P30749 | P18843 | <a href="#">moae_ecoli</a>  | <a href="#">nade_ecoli</a> |
| P18843 | NADE_ECOLI | * P12281 | P18843 | <a href="#">moea_ecoli</a>  | <a href="#">nade_ecoli</a> |
| P18843 | NADE_ECOLI | * P12282 | P18843 | <a href="#">moeb_ecoli</a>  | <a href="#">nade_ecoli</a> |
| P18843 | NADE_ECOLI | * P76329 | P18843 | <a href="#">mpgp_ecoli</a>  | <a href="#">nade_ecoli</a> |
| P18843 | NADE_ECOLI | * P0AF08 | P18843 | <a href="#">mrp_ecoli</a>   | <a href="#">nade_ecoli</a> |



|        |            |   |        |        |                            |                            |
|--------|------------|---|--------|--------|----------------------------|----------------------------|
| P18843 | NADE_ECOLI | * | P76346 | P18843 | mtfa_ecoli                 | nade_ecoli                 |
| P18843 | NADE_ECOLI | * | P0A749 | P18843 | <a href="#">mura_ecoli</a> | <a href="#">nade_ecoli</a> |
| P18843 | NADE_ECOLI | * | P22188 | P18843 | mure_ecoli                 | nade_ecoli                 |
| P18843 | NADE_ECOLI | * | P11880 | P18843 | murf_ecoli                 | nade_ecoli                 |
| P18843 | NADE_ECOLI | * | P77245 | P18843 | murr_ecoli                 | nade_ecoli                 |
| P18843 | NADE_ECOLI | * | P11458 | P18843 | nada_ecoli                 | nade_ecoli                 |
| P18843 | NADE_ECOLI | * | P0AF18 | P18843 | naga_ecoli                 | nade_ecoli                 |
| P18843 | NADE_ECOLI | * | P0A759 | P18843 | nagb_ecoli                 | nade_ecoli                 |
| P18843 | NADE_ECOLI | * | P75959 | P18843 | nagk_ecoli                 | nade_ecoli                 |
| P18843 | NADE_ECOLI | * | P0A6L4 | P18843 | <a href="#">nana_ecoli</a> | <a href="#">nade_ecoli</a> |
| P18843 | NADE_ECOLI | * | P11349 | P18843 | <a href="#">narh_ecoli</a> | <a href="#">nade_ecoli</a> |
| P18843 | NADE_ECOLI | * | P19317 | P18843 | narw_ecoli                 | nade_ecoli                 |
| P18843 | NADE_ECOLI | * | P63020 | P18843 | <a href="#">nfua_ecoli</a> | <a href="#">nade_ecoli</a> |
| P18843 | NADE_ECOLI | * | P77567 | P18843 | nhoa_ecoli                 | nade_ecoli                 |
| P18843 | NADE_ECOLI | * | P04846 | P18843 | nlpa_ecoli                 | nade_ecoli                 |
| P18843 | NADE_ECOLI | * | P0A903 | P18843 | nlpb_ecoli                 | nade_ecoli                 |
| P18843 | NADE_ECOLI | * | P31062 | P18843 | nohb_ecoli                 | nade_ecoli                 |
| P18843 | NADE_ECOLI | * | Q46877 | P18843 | norv_ecoli                 | nade_ecoli                 |
| P18843 | NADE_ECOLI | * | P28903 | P18843 | nrdd_ecoli                 | nade_ecoli                 |
| P18843 | NADE_ECOLI | * | P0AC65 | P18843 | nrdr_ecoli                 | nade_ecoli                 |
| P18843 | NADE_ECOLI | * | P0A8D0 | P18843 | nrdr_ecoli                 | nade_ecoli                 |
| P18843 | NADE_ECOLI | * | P0ABL1 | P18843 | nrfb_ecoli                 | nade_ecoli                 |
| P18843 | NADE_ECOLI | * | P32712 | P18843 | nrfg_ecoli                 | nade_ecoli                 |
| P18843 | NADE_ECOLI | * | P0AFC0 | P18843 | <a href="#">nudb_ecoli</a> | <a href="#">nade_ecoli</a> |
| P18843 | NADE_ECOLI | * | P77788 | P18843 | nudg_ecoli                 | nade_ecoli                 |
| P18843 | NADE_ECOLI | * | P0A780 | P18843 | <a href="#">nusb_ecoli</a> | <a href="#">nade_ecoli</a> |
| P18843 | NADE_ECOLI | * | P77737 | P18843 | oppf_ecoli                 | nade_ecoli                 |
| P18843 | NADE_ECOLI | * | P33362 | P18843 | <a href="#">osmf_ecoli</a> | <a href="#">nade_ecoli</a> |
| P18843 | NADE_ECOLI | * | P04391 | P18843 | otc1_ecoli                 | nade_ecoli                 |
| P18843 | NADE_ECOLI | * | P31678 | P18843 | otsb_ecoli                 | nade_ecoli                 |
| P18843 | NADE_ECOLI | * | P0AFI0 | P18843 | oxc_ecoli                  | nade_ecoli                 |
| P18843 | NADE_ECOLI | * | P0A9L8 | P18843 | p5cr_ecoli                 | nade_ecoli                 |
| P18843 | NADE_ECOLI | * | P76078 | P18843 | paab_ecoli                 | nade_ecoli                 |
| P18843 | NADE_ECOLI | * | P0A9J4 | P18843 | pane_ecoli                 | nade_ecoli                 |
| P18843 | NADE_ECOLI | * | P05459 | P18843 | pdxb_ecoli                 | nade_ecoli                 |
| P18843 | NADE_ECOLI | * | P29745 | P18843 | <a href="#">pept_ecoli</a> | <a href="#">nade_ecoli</a> |
| P18843 | NADE_ECOLI | * | P0A9N4 | P18843 | <a href="#">pfla_ecoli</a> | <a href="#">nade_ecoli</a> |
| P18843 | NADE_ECOLI | * | P09373 | P18843 | <a href="#">pflb_ecoli</a> | <a href="#">nade_ecoli</a> |
| P18843 | NADE_ECOLI | * | P36938 | P18843 | <a href="#">pgm_ecoli</a>  | <a href="#">nade_ecoli</a> |
| P18843 | NADE_ECOLI | * | P0AFJ5 | P18843 | phob_ecoli                 | nade_ecoli                 |
| P18843 | NADE_ECOLI | * | P23836 | P18843 | <a href="#">phop_ecoli</a> | <a href="#">nade_ecoli</a> |
| P18843 | NADE_ECOLI | * | P18133 | P18843 | pncb_ecoli                 | nade_ecoli                 |
| P18843 | NADE_ECOLI | * | P07003 | P18843 | poxb_ecoli                 | nade_ecoli                 |
| P18843 | NADE_ECOLI | * | P31992 | P18843 | ppta_ecoli                 | nade_ecoli                 |
| P18843 | NADE_ECOLI | * | P0AFL6 | P18843 | ppx_ecoli                  | nade_ecoli                 |

|        |            |          |        |             |            |
|--------|------------|----------|--------|-------------|------------|
| P18843 | NADE_ECOLI | * P0A8T1 | P18843 | prma_ecoli  | nade_ecoli |
| P18843 | NADE_ECOLI | * P77541 | P18843 | prpb_ecoli  | nade_ecoli |
| P18843 | NADE_ECOLI | * P31660 | P18843 | prpc_ecoli  | nade_ecoli |
| P18843 | NADE_ECOLI | * P77243 | P18843 | prpd_ecoli  | nade_ecoli |
| P18843 | NADE_ECOLI | * P33025 | P18843 | psug_ecoli  | nade_ecoli |
| P18843 | NADE_ECOLI | * P30235 | P18843 | psuk_ecoli  | nade_ecoli |
| P18843 | NADE_ECOLI | * P08839 | P18843 | pt1_ecoli   | nade_ecoli |
| P18843 | NADE_ECOLI | * P0A9M8 | P18843 | pta_ecoli   | nade_ecoli |
| P18843 | NADE_ECOLI | * P69816 | P18843 | ptfb2_ecoli | nade_ecoli |
| P18843 | NADE_ECOLI | * P05458 | P18843 | ptr_a_ecoli | nade_ecoli |
| P18843 | NADE_ECOLI | * P0AB89 | P18843 | pur8_ecoli  | nade_ecoli |
| P18843 | NADE_ECOLI | * P15639 | P18843 | pur9_ecoli  | nade_ecoli |
| P18843 | NADE_ECOLI | * P0AG18 | P18843 | pure_ecoli  | nade_ecoli |
| P18843 | NADE_ECOLI | * P09029 | P18843 | purk_ecoli  | nade_ecoli |
| P18843 | NADE_ECOLI | * P33221 | P18843 | purt_ecoli  | nade_ecoli |
| P18843 | NADE_ECOLI | * P37906 | P18843 | puub_ecoli  | nade_ecoli |
| P18843 | NADE_ECOLI | * P05020 | P18843 | pyrc_ecoli  | nade_ecoli |
| P18843 | NADE_ECOLI | * P0A7E5 | P18843 | pyrg_ecoli  | nade_ecoli |
| P18843 | NADE_ECOLI | * P39315 | P18843 | qor2_ecoli  | nade_ecoli |
| P18843 | NADE_ECOLI | * P0A7F9 | P18843 | quea_ecoli  | nade_ecoli |
| P18843 | NADE_ECOLI | * P76062 | P18843 | racr_ecoli  | nade_ecoli |
| P18843 | NADE_ECOLI | * P0A7G2 | P18843 | rbfa_ecoli  | nade_ecoli |
| P18843 | NADE_ECOLI | * P02925 | P18843 | rbsb_ecoli  | nade_ecoli |
| P18843 | NADE_ECOLI | * P0A7G6 | P18843 | reca_ecoli  | nade_ecoli |
| P18843 | NADE_ECOLI | * P24230 | P18843 | recg_ecoli  | nade_ecoli |
| P18843 | NADE_ECOLI | * P0C079 | P18843 | relb_ecoli  | nade_ecoli |
| P18843 | NADE_ECOLI | * P0A7I0 | P18843 | rf1_ecoli   | nade_ecoli |
| P18843 | NADE_ECOLI | * P0AFW0 | P18843 | rfah_ecoli  | nade_ecoli |
| P18843 | NADE_ECOLI | * P25888 | P18843 | rhle_ecoli  | nade_ecoli |
| P18843 | NADE_ECOLI | * P77215 | P18843 | rhmd_ecoli  | nade_ecoli |
| P18843 | NADE_ECOLI | * P25539 | P18843 | ribd_ecoli  | nade_ecoli |
| P18843 | NADE_ECOLI | * P0AG40 | P18843 | ribf_ecoli  | nade_ecoli |
| P18843 | NADE_ECOLI | * P41409 | P18843 | riha_ecoli  | nade_ecoli |
| P18843 | NADE_ECOLI | * P33022 | P18843 | rihb_ecoli  | nade_ecoli |
| P18843 | NADE_ECOLI | * P0AEI4 | P18843 | rimo_ecoli  | nade_ecoli |
| P18843 | NADE_ECOLI | * P0A7J7 | P18843 | rl11_ecoli  | nade_ecoli |
| P18843 | NADE_ECOLI | * P0A7L8 | P18843 | rl27_ecoli  | nade_ecoli |
| P18843 | NADE_ECOLI | * P0A7M6 | P18843 | rl29_ecoli  | nade_ecoli |
| P18843 | NADE_ECOLI | * P75864 | P18843 | rlml_ecoli  | nade_ecoli |
| P18843 | NADE_ECOLI | * P36979 | P18843 | rlmn_ecoli  | nade_ecoli |
| P18843 | NADE_ECOLI | * P32684 | P18843 | rluf_ecoli  | nade_ecoli |
| P18843 | NADE_ECOLI | * P37744 | P18843 | rmla1_ecoli | nade_ecoli |
| P18843 | NADE_ECOLI | * P37759 | P18843 | rmlb1_ecoli | nade_ecoli |
| P18843 | NADE_ECOLI | * P30850 | P18843 | rnb_ecoli   | nade_ecoli |
| P18843 | NADE_ECOLI | * P0AFW4 | P18843 | rnk_ecoli   | nade_ecoli |

|        |            |   |        |        |                             |                            |
|--------|------------|---|--------|--------|-----------------------------|----------------------------|
| P18843 | NADE_ECOLI | * | P00579 | P18843 | <a href="#">rpod_ecoli</a>  | <a href="#">nade_ecoli</a> |
| P18843 | NADE_ECOLI | * | P0ADZ4 | P18843 | <a href="#">rs15_ecoli</a>  | <a href="#">nade_ecoli</a> |
| P18843 | NADE_ECOLI | * | P0A7T3 | P18843 | <a href="#">rs16_ecoli</a>  | <a href="#">nade_ecoli</a> |
| P18843 | NADE_ECOLI | * | P39406 | P18843 | <a href="#">rsmc_ecoli</a>  | <a href="#">nade_ecoli</a> |
| P18843 | NADE_ECOLI | * | P75817 | P18843 | <a href="#">rumb_ecoli</a>  | <a href="#">nade_ecoli</a> |
| P18843 | NADE_ECOLI | * | P75898 | P18843 | <a href="#">ruta_ecoli</a>  | <a href="#">nade_ecoli</a> |
| P18843 | NADE_ECOLI | * | P0AFQ5 | P18843 | <a href="#">rutc_ecoli</a>  | <a href="#">nade_ecoli</a> |
| P18843 | NADE_ECOLI | * | P0A809 | P18843 | <a href="#">ruva_ecoli</a>  | <a href="#">nade_ecoli</a> |
| P18843 | NADE_ECOLI | * | P0AG76 | P18843 | <a href="#">sbcd_ecoli</a>  | <a href="#">nade_ecoli</a> |
| P18843 | NADE_ECOLI | * | P00926 | P18843 | <a href="#">sdhd_ecoli</a>  | <a href="#">nade_ecoli</a> |
| P18843 | NADE_ECOLI | * | P16456 | P18843 | <a href="#">seld_ecoli</a>  | <a href="#">nade_ecoli</a> |
| P18843 | NADE_ECOLI | * | P0AGB0 | P18843 | <a href="#">serb_ecoli</a>  | <a href="#">nade_ecoli</a> |
| P18843 | NADE_ECOLI | * | P23721 | P18843 | <a href="#">serc_ecoli</a>  | <a href="#">nade_ecoli</a> |
| P18843 | NADE_ECOLI | * | P33018 | P18843 | <a href="#">sfgh2_ecoli</a> | <a href="#">nade_ecoli</a> |
| P18843 | NADE_ECOLI | * | P36566 | P18843 | <a href="#">smta_ecoli</a>  | <a href="#">nade_ecoli</a> |
| P18843 | NADE_ECOLI | * | P21170 | P18843 | <a href="#">spea_ecoli</a>  | <a href="#">nade_ecoli</a> |
| P18843 | NADE_ECOLI | * | P60651 | P18843 | <a href="#">speb_ecoli</a>  | <a href="#">nade_ecoli</a> |
| P18843 | NADE_ECOLI | * | P0AFV4 | P18843 | <a href="#">spr_ecoli</a>   | <a href="#">nade_ecoli</a> |
| P18843 | NADE_ECOLI | * | P80645 | P18843 | <a href="#">ssud_ecoli</a>  | <a href="#">nade_ecoli</a> |
| P18843 | NADE_ECOLI | * | P0AG78 | P18843 | <a href="#">subi_ecoli</a>  | <a href="#">nade_ecoli</a> |
| P18843 | NADE_ECOLI | * | P77667 | P18843 | <a href="#">sufa_ecoli</a>  | <a href="#">nade_ecoli</a> |
| P18843 | NADE_ECOLI | * | P76194 | P18843 | <a href="#">sufe_ecoli</a>  | <a href="#">nade_ecoli</a> |
| P18843 | NADE_ECOLI | * | P0ADG4 | P18843 | <a href="#">suhb_ecoli</a>  | <a href="#">nade_ecoli</a> |
| P18843 | NADE_ECOLI | * | P75792 | P18843 | <a href="#">suph_ecoli</a>  | <a href="#">nade_ecoli</a> |
| P18843 | NADE_ECOLI | * | P21888 | P18843 | <a href="#">syc_ecoli</a>   | <a href="#">nade_ecoli</a> |
| P18843 | NADE_ECOLI | * | P21889 | P18843 | <a href="#">syd_ecoli</a>   | <a href="#">nade_ecoli</a> |
| P18843 | NADE_ECOLI | * | P0A8N3 | P18843 | <a href="#">syk1_ecoli</a>  | <a href="#">nade_ecoli</a> |
| P18843 | NADE_ECOLI | * | P0A8M0 | P18843 | <a href="#">syn_ecoli</a>   | <a href="#">nade_ecoli</a> |
| P18843 | NADE_ECOLI | * | P0A8M3 | P18843 | <a href="#">syt_ecoli</a>   | <a href="#">nade_ecoli</a> |
| P18843 | NADE_ECOLI | * | P00954 | P18843 | <a href="#">syw_ecoli</a>   | <a href="#">nade_ecoli</a> |
| P18843 | NADE_ECOLI | * | P0AGJ9 | P18843 | <a href="#">syy_ecoli</a>   | <a href="#">nade_ecoli</a> |
| P18843 | NADE_ECOLI | * | P08957 | P18843 | <a href="#">t1mk_ecoli</a>  | <a href="#">nade_ecoli</a> |
| P18843 | NADE_ECOLI | * | P0A867 | P18843 | <a href="#">tala_ecoli</a>  | <a href="#">nade_ecoli</a> |
| P18843 | NADE_ECOLI | * | P07913 | P18843 | <a href="#">tdh_ecoli</a>   | <a href="#">nade_ecoli</a> |
| P18843 | NADE_ECOLI | * | P0AGG2 | P18843 | <a href="#">tesb_ecoli</a>  | <a href="#">nade_ecoli</a> |
| P18843 | NADE_ECOLI | * | P0A847 | P18843 | <a href="#">tgt_ecoli</a>   | <a href="#">nade_ecoli</a> |
| P18843 | NADE_ECOLI | * | P30138 | P18843 | <a href="#">thif_ecoli</a>  | <a href="#">nade_ecoli</a> |
| P18843 | NADE_ECOLI | * | P0AGG0 | P18843 | <a href="#">thil_ecoli</a>  | <a href="#">nade_ecoli</a> |
| P18843 | NADE_ECOLI | * | P0A850 | P18843 | <a href="#">tig_ecoli</a>   | <a href="#">nade_ecoli</a> |
| P18843 | NADE_ECOLI | * | P0AGG8 | P18843 | <a href="#">tldd_ecoli</a>  | <a href="#">nade_ecoli</a> |
| P18843 | NADE_ECOLI | * | P28904 | P18843 | <a href="#">trec_ecoli</a>  | <a href="#">nade_ecoli</a> |
| P18843 | NADE_ECOLI | * | P0A877 | P18843 | <a href="#">trpa_ecoli</a>  | <a href="#">nade_ecoli</a> |
| P18843 | NADE_ECOLI | * | P0A879 | P18843 | <a href="#">trpb_ecoli</a>  | <a href="#">nade_ecoli</a> |
| P18843 | NADE_ECOLI | * | P00909 | P18843 | <a href="#">trpc_ecoli</a>  | <a href="#">nade_ecoli</a> |
| P18843 | NADE_ECOLI | * | P00895 | P18843 | <a href="#">trpe_ecoli</a>  | <a href="#">nade_ecoli</a> |

|        |            |          |        |                            |                            |
|--------|------------|----------|--------|----------------------------|----------------------------|
| P18843 | NADE_ECOLI | * P0A9P4 | P18843 | <a href="#">trxb_ecoli</a> | <a href="#">nade_ecoli</a> |
| P18843 | NADE_ECOLI | * P0A890 | P18843 | <a href="#">tusa_ecoli</a> | <a href="#">nade_ecoli</a> |
| P18843 | NADE_ECOLI | * P75728 | P18843 | <a href="#">ubif_ecoli</a> | <a href="#">nade_ecoli</a> |
| P18843 | NADE_ECOLI | * P37903 | P18843 | <a href="#">uspf_ecoli</a> | <a href="#">nade_ecoli</a> |
| P18843 | NADE_ECOLI | * P43672 | P18843 | <a href="#">uup_ecoli</a>  | <a href="#">nade_ecoli</a> |
| P18843 | NADE_ECOLI | * P0A6L7 | P18843 | <a href="#">uxab_ecoli</a> | <a href="#">nade_ecoli</a> |
| P18843 | NADE_ECOLI | * P0A8G3 | P18843 | <a href="#">uxac_ecoli</a> | <a href="#">nade_ecoli</a> |
| P18843 | NADE_ECOLI | * P24215 | P18843 | <a href="#">uxua_ecoli</a> | <a href="#">nade_ecoli</a> |
| P18843 | NADE_ECOLI | * P39160 | P18843 | <a href="#">uxub_ecoli</a> | <a href="#">nade_ecoli</a> |
| P18843 | NADE_ECOLI | * P75970 | P18843 | <a href="#">vxis_ecoli</a> | <a href="#">nade_ecoli</a> |
| P18843 | NADE_ECOLI | * P37750 | P18843 | <a href="#">wbbj_ecoli</a> | <a href="#">nade_ecoli</a> |
| P18843 | NADE_ECOLI | * P77414 | P18843 | <a href="#">wcaa_ecoli</a> | <a href="#">nade_ecoli</a> |
| P18843 | NADE_ECOLI | * P45563 | P18843 | <a href="#">xapa_ecoli</a> | <a href="#">nade_ecoli</a> |
| P18843 | NADE_ECOLI | * P36680 | P18843 | <a href="#">yacf_ecoli</a> | <a href="#">nade_ecoli</a> |
| P18843 | NADE_ECOLI | * Q47158 | P18843 | <a href="#">yafp_ecoli</a> | <a href="#">nade_ecoli</a> |
| P18843 | NADE_ECOLI | * P77165 | P18843 | <a href="#">yagt_ecoli</a> | <a href="#">nade_ecoli</a> |
| P18843 | NADE_ECOLI | * P77736 | P18843 | <a href="#">yahd_ecoli</a> | <a href="#">nade_ecoli</a> |
| P18843 | NADE_ECOLI | * P77297 | P18843 | <a href="#">yahe_ecoli</a> | <a href="#">nade_ecoli</a> |
| P18843 | NADE_ECOLI | * P77221 | P18843 | <a href="#">yahg_ecoli</a> | <a href="#">nade_ecoli</a> |
| P18843 | NADE_ECOLI | * P77554 | P18843 | <a href="#">yahj_ecoli</a> | <a href="#">nade_ecoli</a> |
| P18843 | NADE_ECOLI | * P75691 | P18843 | <a href="#">yahk_ecoli</a> | <a href="#">nade_ecoli</a> |
| P18843 | NADE_ECOLI | * P0AAN5 | P18843 | <a href="#">yaia_ecoli</a> | <a href="#">nade_ecoli</a> |
| P18843 | NADE_ECOLI | * P51024 | P18843 | <a href="#">yail_ecoli</a> | <a href="#">nade_ecoli</a> |
| P18843 | NADE_ECOLI | * P77735 | P18843 | <a href="#">yajo_ecoli</a> | <a href="#">nade_ecoli</a> |
| P18843 | NADE_ECOLI | * P0A8B5 | P18843 | <a href="#">ybab_ecoli</a> | <a href="#">nade_ecoli</a> |
| P18843 | NADE_ECOLI | * P0AAR3 | P18843 | <a href="#">ybak_ecoli</a> | <a href="#">nade_ecoli</a> |
| P18843 | NADE_ECOLI | * P0A9T8 | P18843 | <a href="#">ybba_ecoli</a> | <a href="#">nade_ecoli</a> |
| P18843 | NADE_ECOLI | * P68661 | P18843 | <a href="#">ybco_ecoli</a> | <a href="#">nade_ecoli</a> |
| P18843 | NADE_ECOLI | * P0A8Y8 | P18843 | <a href="#">ybdb_ecoli</a> | <a href="#">nade_ecoli</a> |
| P18843 | NADE_ECOLI | * P0AAS9 | P18843 | <a href="#">ybdd_ecoli</a> | <a href="#">nade_ecoli</a> |
| P18843 | NADE_ECOLI | * P45579 | P18843 | <a href="#">ybdh_ecoli</a> | <a href="#">nade_ecoli</a> |
| P18843 | NADE_ECOLI | * P77806 | P18843 | <a href="#">ybdl_ecoli</a> | <a href="#">nade_ecoli</a> |
| P18843 | NADE_ECOLI | * P77174 | P18843 | <a href="#">ybdm_ecoli</a> | <a href="#">nade_ecoli</a> |
| P18843 | NADE_ECOLI | * P0A8J4 | P18843 | <a href="#">ybed_ecoli</a> | <a href="#">nade_ecoli</a> |
| P18843 | NADE_ECOLI | * P0AAT9 | P18843 | <a href="#">ybel_ecoli</a> | <a href="#">nade_ecoli</a> |
| P18843 | NADE_ECOLI | * P75746 | P18843 | <a href="#">ybgf_ecoli</a> | <a href="#">nade_ecoli</a> |
| P18843 | NADE_ECOLI | * P75767 | P18843 | <a href="#">ybhk_ecoli</a> | <a href="#">nade_ecoli</a> |
| P18843 | NADE_ECOLI | * P0AA84 | P18843 | <a href="#">ybho_ecoli</a> | <a href="#">nade_ecoli</a> |
| P18843 | NADE_ECOLI | * P30176 | P18843 | <a href="#">ybia_ecoli</a> | <a href="#">nade_ecoli</a> |
| P18843 | NADE_ECOLI | * P41039 | P18843 | <a href="#">ybii_ecoli</a> | <a href="#">nade_ecoli</a> |
| P18843 | NADE_ECOLI | * P0AB14 | P18843 | <a href="#">yccj_ecoli</a> | <a href="#">nade_ecoli</a> |
| P18843 | NADE_ECOLI | * P0AB24 | P18843 | <a href="#">ycdo_ecoli</a> | <a href="#">nade_ecoli</a> |
| P18843 | NADE_ECOLI | * P75914 | P18843 | <a href="#">ycdx_ecoli</a> | <a href="#">nade_ecoli</a> |
| P18843 | NADE_ECOLI | * P0AFQ7 | P18843 | <a href="#">ycfh_ecoli</a> | <a href="#">nade_ecoli</a> |
| P18843 | NADE_ECOLI | * P0AB43 | P18843 | <a href="#">ycgl_ecoli</a> | <a href="#">nade_ecoli</a> |

|        |            |   |        |        |            |            |
|--------|------------|---|--------|--------|------------|------------|
| P18843 | NADE_ECOLI | * | P76010 | P18843 | ycgr_ecoli | nade_ecoli |
| P18843 | NADE_ECOLI | * | P39165 | P18843 | ycho_ecoli | nade_ecoli |
| P18843 | NADE_ECOLI | * | P0A8Z0 | P18843 | ycia_ecoli | nade_ecoli |
| P18843 | NADE_ECOLI | * | P21363 | P18843 | ycie_ecoli | nade_ecoli |
| P18843 | NADE_ECOLI | * | P21361 | P18843 | ycig_ecoli | nade_ecoli |
| P18843 | NADE_ECOLI | * | P0AB55 | P18843 | ycii_ecoli | nade_ecoli |
| P18843 | NADE_ECOLI | * | P0AB61 | P18843 | ycin_ecoli | nade_ecoli |
| P18843 | NADE_ECOLI | * | P76034 | P18843 | ycit_ecoli | nade_ecoli |
| P18843 | NADE_ECOLI | * | P77615 | P18843 | ycjw_ecoli | nade_ecoli |
| P18843 | NADE_ECOLI | * | P38394 | P18843 | ydae_ecoli | nade_ecoli |
| P18843 | NADE_ECOLI | * | P76063 | P18843 | ydas_ecoli | nade_ecoli |
| P18843 | NADE_ECOLI | * | P76069 | P18843 | yday_ecoli | nade_ecoli |
| P18843 | NADE_ECOLI | * | P37757 | P18843 | ydde_ecoli | nade_ecoli |
| P18843 | NADE_ECOLI | * | P39831 | P18843 | ydfg_ecoli | nade_ecoli |
| P18843 | NADE_ECOLI | * | P76165 | P18843 | ydfx_ecoli | nade_ecoli |
| P18843 | NADE_ECOLI | * | P64463 | P18843 | ydfz_ecoli | nade_ecoli |
| P18843 | NADE_ECOLI | * | P77552 | P18843 | ydhq_ecoli | nade_ecoli |
| P18843 | NADE_ECOLI | * | P77148 | P18843 | ydhs_ecoli | nade_ecoli |
| P18843 | NADE_ECOLI | * | P0ACX5 | P18843 | ydhz_ecoli | nade_ecoli |
| P18843 | NADE_ECOLI | * | P0ACX9 | P18843 | ydie_ecoli | nade_ecoli |
| P18843 | NADE_ECOLI | * | P77337 | P18843 | ydis_ecoli | nade_ecoli |
| P18843 | NADE_ECOLI | * | P77280 | P18843 | ydj_ecoli  | nade_ecoli |
| P18843 | NADE_ECOLI | * | P39173 | P18843 | yead_ecoli | nade_ecoli |
| P18843 | NADE_ECOLI | * | P76234 | P18843 | yeae_ecoli | nade_ecoli |
| P18843 | NADE_ECOLI | * | P0ACY3 | P18843 | yeag_ecoli | nade_ecoli |
| P18843 | NADE_ECOLI | * | P64483 | P18843 | yeak_ecoli | nade_ecoli |
| P18843 | NADE_ECOLI | * | P76243 | P18843 | yeao_ecoli | nade_ecoli |
| P18843 | NADE_ECOLI | * | P64488 | P18843 | year_ecoli | nade_ecoli |
| P18843 | NADE_ECOLI | * | P0A8A0 | P18843 | yebc_ecoli | nade_ecoli |
| P18843 | NADE_ECOLI | * | P0ACY9 | P18843 | yebg_ecoli | nade_ecoli |
| P18843 | NADE_ECOLI | * | P0AD07 | P18843 | yecf_ecoli | nade_ecoli |
| P18843 | NADE_ECOLI | * | P46887 | P18843 | yech_ecoli | nade_ecoli |
| P18843 | NADE_ECOLI | * | P0AD10 | P18843 | yecj_ecoli | nade_ecoli |
| P18843 | NADE_ECOLI | * | P0AA31 | P18843 | yedf_ecoli | nade_ecoli |
| P18843 | NADE_ECOLI | * | P76318 | P18843 | yedk_ecoli | nade_ecoli |
| P18843 | NADE_ECOLI | * | P76321 | P18843 | yedn_ecoli | nade_ecoli |
| P18843 | NADE_ECOLI | * | P76364 | P18843 | yeeu_ecoli | nade_ecoli |
| P18843 | NADE_ECOLI | * | P64524 | P18843 | yeev_ecoli | nade_ecoli |
| P18843 | NADE_ECOLI | * | P76396 | P18843 | yegl_ecoli | nade_ecoli |
| P18843 | NADE_ECOLI | * | P76407 | P18843 | yegs_ecoli | nade_ecoli |
| P18843 | NADE_ECOLI | * | P76418 | P18843 | yegu_ecoli | nade_ecoli |
| P18843 | NADE_ECOLI | * | P76419 | P18843 | yegv_ecoli | nade_ecoli |
| P18843 | NADE_ECOLI | * | P0AD21 | P18843 | yejg_ecoli | nade_ecoli |
| P18843 | NADE_ECOLI | * | P64540 | P18843 | yfcl_ecoli | nade_ecoli |
| P18843 | NADE_ECOLI | * | P77196 | P18843 | yfcu_ecoli | nade_ecoli |



|        |            |          |        |            |            |
|--------|------------|----------|--------|------------|------------|
| P18843 | NADE_ECOLI | * P76518 | P18843 | yfde_ecoli | nade_ecoli |
| P18843 | NADE_ECOLI | * P77434 | P18843 | yfdz_ecoli | nade_ecoli |
| P18843 | NADE_ECOLI | * P76536 | P18843 | yfex_ecoli | nade_ecoli |
| P18843 | NADE_ECOLI | * P76569 | P18843 | yfgd_ecoli | nade_ecoli |
| P18843 | NADE_ECOLI | * P0AFU4 | P18843 | yfha_ecoli | nade_ecoli |
| P18843 | NADE_ECOLI | * P52102 | P18843 | yfhl_ecoli | nade_ecoli |
| P18843 | NADE_ECOLI | * P0A6G3 | P18843 | ygad_ecoli | nade_ecoli |
| P18843 | NADE_ECOLI | * P76632 | P18843 | ygck_ecoli | nade_ecoli |
| P18843 | NADE_ECOLI | * P0AGF2 | P18843 | ygdk_ecoli | nade_ecoli |
| P18843 | NADE_ECOLI | * P0ADE8 | P18843 | ygfz_ecoli | nade_ecoli |
| P18843 | NADE_ECOLI | * P52062 | P18843 | yggw_ecoli | nade_ecoli |
| P18843 | NADE_ECOLI | * P30871 | P18843 | ygif_ecoli | nade_ecoli |
| P18843 | NADE_ECOLI | * P0ADU2 | P18843 | ygin_ecoli | nade_ecoli |
| P18843 | NADE_ECOLI | * P0AGK4 | P18843 | yhby_ecoli | nade_ecoli |
| P18843 | NADE_ECOLI | * P0ADW6 | P18843 | yhcc_ecoli | nade_ecoli |
| P18843 | NADE_ECOLI | * P64616 | P18843 | yhco_ecoli | nade_ecoli |
| P18843 | NADE_ECOLI | * P67624 | P18843 | yheu_ecoli | nade_ecoli |
| P18843 | NADE_ECOLI | * P45545 | P18843 | yhfs_ecoli | nade_ecoli |
| P18843 | NADE_ECOLI | * P37631 | P18843 | yhin_ecoli | nade_ecoli |
| P18843 | NADE_ECOLI | * P37634 | P18843 | yhir_ecoli | nade_ecoli |
| P18843 | NADE_ECOLI | * P32141 | P18843 | yiht_ecoli | nade_ecoli |
| P18843 | NADE_ECOLI | * P0A9V8 | P18843 | yihu_ecoli | nade_ecoli |
| P18843 | NADE_ECOLI | * P32162 | P18843 | yiis_ecoli | nade_ecoli |
| P18843 | NADE_ECOLI | * P09162 | P18843 | yjaa_ecoli | nade_ecoli |
| P18843 | NADE_ECOLI | * P68206 | P18843 | ybjj_ecoli | nade_ecoli |
| P18843 | NADE_ECOLI | * P32704 | P18843 | yjcf_ecoli | nade_ecoli |
| P18843 | NADE_ECOLI | * P0AF67 | P18843 | yjee_ecoli | nade_ecoli |
| P18843 | NADE_ECOLI | * P39342 | P18843 | yjgr_ecoli | nade_ecoli |
| P18843 | NADE_ECOLI | * P0A9W3 | P18843 | yjjk_ecoli | nade_ecoli |
| P18843 | NADE_ECOLI | * P75713 | P18843 | ylba_ecoli | nade_ecoli |
| P18843 | NADE_ECOLI | * P0ACV8 | P18843 | ymja_ecoli | nade_ecoli |
| P18843 | NADE_ECOLI | * P76068 | P18843 | ynak_ecoli | nade_ecoli |
| P18843 | NADE_ECOLI | * P0AA57 | P18843 | yoba_ecoli | nade_ecoli |
| P18843 | NADE_ECOLI | * P76280 | P18843 | yobb_ecoli | nade_ecoli |
| P18843 | NADE_ECOLI | * P33368 | P18843 | yohf_ecoli | nade_ecoli |
| P18843 | NADE_ECOLI | * P77585 | P18843 | ypde_ecoli | nade_ecoli |
| P18843 | NADE_ECOLI | * P42620 | P18843 | yqjg_ecoli | nade_ecoli |
| P18843 | NADE_ECOLI | * P45465 | P18843 | yran_ecoli | nade_ecoli |
| P18843 | NADE_ECOLI | * P0A9W6 | P18843 | yrba_ecoli | nade_ecoli |
| P18843 | NADE_ECOLI | * P46857 | P18843 | yrhb_ecoli | nade_ecoli |
| P0AF20 | NAGC_ECOLI | * P31441 | P0AF20 | adec_ecoli | nagc_ecoli |
| P0AF20 | NAGC_ECOLI | * P0A9H9 | P0AF20 | chez_ecoli | nagc_ecoli |
| P0AF20 | NAGC_ECOLI | * P0ABJ1 | P0AF20 | cyoa_ecoli | nagc_ecoli |
| P0AF20 | NAGC_ECOLI | * P0AEL6 | P0AF20 | fepb_ecoli | nagc_ecoli |



|        |            |          |        |            |            |
|--------|------------|----------|--------|------------|------------|
| P0A6L4 | NANA_ECOLI | * P28721 | P0A6L4 | gltf_ecoli | nana_ecoli |
| P0A6L4 | NANA_ECOLI | * P0AAN5 | P0A6L4 | yaia_ecoli | nana_ecoli |
| P0A8W0 | NANR_ECOLI | * P0A8S1 | P0A8W0 | icia_ecoli | nanr_ecoli |
| P0AAL3 | NAPG_ECOLI | * P0AAI5 | P0AAL3 | fabf_ecoli | napg_ecoli |
| P0AAL3 | NAPG_ECOLI | * P31802 | P0AAL3 | narp_ecoli | napg_ecoli |
| P0AAL3 | NAPG_ECOLI | * P30136 | P0AAL3 | thic_ecoli | napg_ecoli |
| P0AAL3 | NAPG_ECOLI | * P0A6L7 | P0AAL3 | uxab_ecoli | napg_ecoli |
| P09152 | NARG_ECOLI | * P0A6F5 | P09152 | ch60_ecoli | narg_ecoli |
| P09152 | NARG_ECOLI | * P0A6G7 | P09152 | clpp_ecoli | narg_ecoli |
| P09152 | NARG_ECOLI | * P08622 | P09152 | dnaj_ecoli | narg_ecoli |
| P09152 | NARG_ECOLI | * P77319 | P09152 | hscg_ecoli | narg_ecoli |
| P09152 | NARG_ECOLI | * P0A6H5 | P09152 | hslu_ecoli | narg_ecoli |
| P09152 | NARG_ECOLI | * P0A9X4 | P09152 | mreb_ecoli | narg_ecoli |
| P09152 | NARG_ECOLI | * P11349 | P09152 | narh_ecoli | narg_ecoli |
| P09152 | NARG_ECOLI | * P11349 | P09152 | narh_ecoli | narg_ecoli |
| P09152 | NARG_ECOLI | * P11349 | P09152 | narh_ecoli | narg_ecoli |
| P09152 | NARG_ECOLI | * P0AF26 | P09152 | narj_ecoli | narg_ecoli |
| P09152 | NARG_ECOLI | * P0AF26 | P09152 | narj_ecoli | narg_ecoli |
| P09152 | NARG_ECOLI | * P19317 | P09152 | narw_ecoli | narg_ecoli |
| P09152 | NARG_ECOLI | * P19317 | P09152 | narw_ecoli | narg_ecoli |
| P09152 | NARG_ECOLI | * P19318 | P09152 | nary_ecoli | narg_ecoli |
| P09152 | NARG_ECOLI | * P19319 | P09152 | narz_ecoli | narg_ecoli |
| P09152 | NARG_ECOLI | * P0AAH0 | P09152 | pstb_ecoli | narg_ecoli |
| P09152 | NARG_ECOLI | * P15254 | P09152 | pur4_ecoli | narg_ecoli |
| P09152 | NARG_ECOLI | * P0CG19 | P09152 | rnph_ecoli | narg_ecoli |
| P09152 | NARG_ECOLI | * P0A698 | P09152 | uvra_ecoli | narg_ecoli |
| P11349 | NARH_ECOLI | * P68644 | P11349 | fixc_ecoli | narh_ecoli |
| P11349 | NARH_ECOLI | * P0AEP7 | P11349 | gcl_ecoli  | narh_ecoli |
| P11349 | NARH_ECOLI | * P09152 | P11349 | narg_ecoli | narh_ecoli |
| P11349 | NARH_ECOLI | * P09152 | P11349 | narg_ecoli | narh_ecoli |
| P11349 | NARH_ECOLI | * P09152 | P11349 | narg_ecoli | narh_ecoli |
| P11349 | NARH_ECOLI | * P09152 | P11349 | narg_ecoli | narh_ecoli |
| P11349 | NARH_ECOLI | * P09152 | P11349 | narg_ecoli | narh_ecoli |
| P11349 | NARH_ECOLI | * P09152 | P11349 | narg_ecoli | narh_ecoli |
| P11349 | NARH_ECOLI | * P0AF26 | P11349 | narj_ecoli | narh_ecoli |
| P11349 | NARH_ECOLI | * P0AF26 | P11349 | narj_ecoli | narh_ecoli |
| P11349 | NARH_ECOLI | * P19317 | P11349 | narw_ecoli | narh_ecoli |
| P11349 | NARH_ECOLI | * P19318 | P11349 | nary_ecoli | narh_ecoli |
| P11349 | NARH_ECOLI | * P19319 | P11349 | narz_ecoli | narh_ecoli |
| P11349 | NARH_ECOLI | * P19319 | P11349 | narz_ecoli | narh_ecoli |

|        |            |          |        |            |            |
|--------|------------|----------|--------|------------|------------|
| P11349 | NARH_ECOLI | * P30235 | P11349 | psuk_ecoli | narh_ecoli |
| P0AF26 | NARJ_ECOLI | * P09152 | P0AF26 | narg_ecoli | narj_ecoli |
| P0AF26 | NARJ_ECOLI | * P09152 | P0AF26 | narg_ecoli | narj_ecoli |
| P0AF28 | NARL_ECOLI | * P76556 | P0AF28 | eutp_ecoli | narl_ecoli |
| P0AF28 | NARL_ECOLI | * P37128 | P0AF28 | nudk_ecoli | narl_ecoli |
| P31802 | NARP_ECOLI | none     |        |            |            |
| P38489 | NFNB_ECOLI | * P0A9X9 | P38489 | cspa_ecoli | nfnb_ecoli |
| P38489 | NFNB_ECOLI | * P11557 | P38489 | damx_ecoli | nfnb_ecoli |
| P38489 | NFNB_ECOLI | * P0ACF4 | P38489 | dbhb_ecoli | nfnb_ecoli |
| P38489 | NFNB_ECOLI | * P0AEE3 | P38489 | degs_ecoli | nfnb_ecoli |
| P38489 | NFNB_ECOLI | * P24200 | P38489 | mcra_ecoli | nfnb_ecoli |
| P38489 | NFNB_ECOLI | * P69791 | P38489 | ptqa_ecoli | nfnb_ecoli |
| P38489 | NFNB_ECOLI | * P25888 | P38489 | rhle_ecoli | nfnb_ecoli |
| P38489 | NFNB_ECOLI | * P0A7W1 | P38489 | rs5_ecoli  | nfnb_ecoli |
| P38489 | NFNB_ECOLI | * P60472 | P38489 | upps_ecoli | nfnb_ecoli |
| P38489 | NFNB_ECOLI | * P52119 | P38489 | yfjf_ecoli | nfnb_ecoli |
| P38489 | NFNB_ECOLI | * P37634 | P38489 | yhir_ecoli | nfnb_ecoli |
| P38489 | NFNB_ECOLI | * P76148 | P38489 | yneg_ecoli | nfnb_ecoli |
| P17117 | NFSA_ECOLI | none     |        |            |            |
| P63020 | NFUA_ECOLI | none     |        |            |            |
| P0A9G2 | NHAR_ECOLI | none     |        |            |            |
| P52647 | NIFJ_ECOLI | * P07364 | P52647 | cher_ecoli | nifj_ecoli |
| P52647 | NIFJ_ECOLI | * P39405 | P52647 | fhuf_ecoli | nifj_ecoli |
| P52647 | NIFJ_ECOLI | * Q47154 | P52647 | mbha_ecoli | nifj_ecoli |
| P52647 | NIFJ_ECOLI | * P52647 | P52647 | nifj_ecoli | nifj_ecoli |
| P52647 | NIFJ_ECOLI | * P0A8D0 | P52647 | nrdr_ecoli | nifj_ecoli |
| P08201 | NIRB_ECOLI | none     |        |            |            |
| P0AF63 | NSRR_ECOLI | none     |        |            |            |
| P0AFB8 | NTRC_ECOLI | * P68644 | P0AFB8 | fixc_ecoli | ntrc_ecoli |
| P0AFB8 | NTRC_ECOLI | * P33232 | P0AFB8 | lidd_ecoli | ntrc_ecoli |
| P0AFB8 | NTRC_ECOLI | * P0AFB5 | P0AFB8 | ntrb_ecoli | ntrc_ecoli |
| P0AFB8 | NTRC_ECOLI | * P0AFB5 | P0AFB8 | ntrb_ecoli | ntrc_ecoli |
| P0AFB8 | NTRC_ECOLI | * P0AFB8 | P0AFB8 | ntrc_ecoli | ntrc_ecoli |
| P0AFB8 | NTRC_ECOLI | * P31828 | P0AFB8 | pqqi_ecoli | ntrc_ecoli |

|        |             |          |        |             |             |
|--------|-------------|----------|--------|-------------|-------------|
| P0AFB8 | NTRC_ECOLI  | * P24211 | P0AFB8 | rhse_ecoli  | ntrc_ecoli  |
| P0AFC0 | NUDB_ECOLI  | none     |        |             |             |
| P32664 | NUDC_ECOLI  | * P0A850 | P32664 | tig_ecoli   | nudc_ecoli  |
| P37128 | NUDK_ECOLI  | * P12282 | P37128 | moeb_ecoli  | nudk_ecoli  |
| P0AFC3 | NUOA_ECOLI  | none     |        |             |             |
| P33599 | NUOCD_ECOLI | * P0A6H5 | P33599 | hslu_ecoli  | nuocd_ecoli |
| P33599 | NUOCD_ECOLI | * P0A9X4 | P33599 | mreb_ecoli  | nuocd_ecoli |
| P33599 | NUOCD_ECOLI | * P36979 | P33599 | rlmn_ecoli  | nuocd_ecoli |
| P31979 | NUOF_ECOLI  | * P13039 | P31979 | fes_ecoli   | nuof_ecoli  |
| P31979 | NUOF_ECOLI  | * P23256 | P31979 | maly_ecoli  | nuof_ecoli  |
| P31979 | NUOF_ECOLI  | * P0AFD1 | P31979 | nuoe_ecoli  | nuof_ecoli  |
| P33602 | NUOG_ECOLI  | * P28249 | P33602 | asma_ecoli  | nuog_ecoli  |
| P33602 | NUOG_ECOLI  | * P12995 | P33602 | bioa_ecoli  | nuog_ecoli  |
| P33602 | NUOG_ECOLI  | * P0A6F5 | P33602 | ch60_ecoli  | nuog_ecoli  |
| P33602 | NUOG_ECOLI  | * P0A9F3 | P33602 | cysb_ecoli  | nuog_ecoli  |
| P33602 | NUOG_ECOLI  | * P52613 | P33602 | flij_ecoli  | nuog_ecoli  |
| P33602 | NUOG_ECOLI  | * P0A9S3 | P33602 | gatd_ecoli  | nuog_ecoli  |
| P33602 | NUOG_ECOLI  | * P0AES2 | P33602 | gudh_ecoli  | nuog_ecoli  |
| P33602 | NUOG_ECOLI  | * P77319 | P33602 | hscg_ecoli  | nuog_ecoli  |
| P33602 | NUOG_ECOLI  | * P19930 | P33602 | hyad_ecoli  | nuog_ecoli  |
| P33602 | NUOG_ECOLI  | * P37769 | P33602 | kdud_ecoli  | nuog_ecoli  |
| P33602 | NUOG_ECOLI  | * P77432 | P33602 | lsrk_ecoli  | nuog_ecoli  |
| P33602 | NUOG_ECOLI  | * P0ACR9 | P33602 | mpra_ecoli  | nuog_ecoli  |
| P33602 | NUOG_ECOLI  | * P24205 | P33602 | msbb_ecoli  | nuog_ecoli  |
| P33602 | NUOG_ECOLI  | * P0A9I5 | P33602 | napd_ecoli  | nuog_ecoli  |
| P33602 | NUOG_ECOLI  | * P63020 | P33602 | nfua_ecoli  | nuog_ecoli  |
| P33602 | NUOG_ECOLI  | * P33599 | P33602 | nuocd_ecoli | nuog_ecoli  |
| P33602 | NUOG_ECOLI  | * P0AFD1 | P33602 | nuoe_ecoli  | nuog_ecoli  |
| P33602 | NUOG_ECOLI  | * P31979 | P33602 | nuof_ecoli  | nuog_ecoli  |
| P33602 | NUOG_ECOLI  | * P11875 | P33602 | syr_ecoli   | nuog_ecoli  |
| P33602 | NUOG_ECOLI  | * P76422 | P33602 | thid_ecoli  | nuog_ecoli  |
| P33602 | NUOG_ECOLI  | * P77766 | P33602 | trph_ecoli  | nuog_ecoli  |
| P33602 | NUOG_ECOLI  | * P0A8E5 | P33602 | yacl_ecoli  | nuog_ecoli  |
| P33602 | NUOG_ECOLI  | * P77627 | P33602 | yber_ecoli  | nuog_ecoli  |
| P33602 | NUOG_ECOLI  | * P76403 | P33602 | yegq_ecoli  | nuog_ecoli  |
| P33602 | NUOG_ECOLI  | * P33347 | P33602 | yehk_ecoli  | nuog_ecoli  |
| P33602 | NUOG_ECOLI  | * P39279 | P33602 | yjej_ecoli  | nuog_ecoli  |
| P33602 | NUOG_ECOLI  | * P0A8D6 | P33602 | ymdb_ecoli  | nuog_ecoli  |

|        |            |          |        |            |            |
|--------|------------|----------|--------|------------|------------|
| P33602 | NUOG_ECOLI | * P0A8W5 | P33602 | yqge_ecoli | nuog_ecoli |
| P0AFF6 | NUSA_ECOLI | * P0AC53 | P0AFF6 | g6pd_ecoli | nusa_ecoli |
| P0AFF6 | NUSA_ECOLI | * P0A6Y1 | P0AFF6 | ihfb_ecoli | nusa_ecoli |
| P0AFF6 | NUSA_ECOLI | * P60240 | P0AFF6 | rapa_ecoli | nusa_ecoli |
| P0AFF6 | NUSA_ECOLI | * P0A7Z4 | P0AFF6 | rpoa_ecoli | nusa_ecoli |
| P0AFF6 | NUSA_ECOLI | * P0A7Z4 | P0AFF6 | rpoa_ecoli | nusa_ecoli |
| P0AFF6 | NUSA_ECOLI | * P0A8V2 | P0AFF6 | rpob_ecoli | nusa_ecoli |
| P0AFF6 | NUSA_ECOLI | * P0A8V2 | P0AFF6 | rpob_ecoli | nusa_ecoli |
| P0AFF6 | NUSA_ECOLI | * P0A8T7 | P0AFF6 | rpoc_ecoli | nusa_ecoli |
| P0AFF6 | NUSA_ECOLI | * P00579 | P0AFF6 | rpod_ecoli | nusa_ecoli |
| P0AFF6 | NUSA_ECOLI | * P00579 | P0AFF6 | rpod_ecoli | nusa_ecoli |
| P0AFF6 | NUSA_ECOLI | * P0A800 | P0AFF6 | rpoz_ecoli | nusa_ecoli |
| P0AFF6 | NUSA_ECOLI | * P0A8E5 | P0AFF6 | yacl_ecoli | nusa_ecoli |
| P0A780 | NUSB_ECOLI | * P0A7R5 | P0A780 | rs10_ecoli | nusb_ecoli |
| P0A780 | NUSB_ECOLI | * P0A7R5 | P0A780 | rs10_ecoli | nusb_ecoli |
| P0A780 | NUSB_ECOLI | * P0A7R5 | P0A780 | rs10_ecoli | nusb_ecoli |
| P0AFG3 | ODO1_ECOLI | * P28629 | P0AFG3 | adia_ecoli | odo1_ecoli |
| P0AFG3 | ODO1_ECOLI | * P0A8G0 | P0AFG3 | uvrc_ecoli | odo1_ecoli |
| P0AFG3 | ODO1_ECOLI | * P75849 | P0AFG3 | ycbl_ecoli | odo1_ecoli |
| P0AFG3 | ODO1_ECOLI | * P63389 | P0AFG3 | yhes_ecoli | odo1_ecoli |
| P0AFG6 | ODO2_ECOLI | * P68767 | P0AFG6 | ampa_ecoli | odo2_ecoli |
| P0AFG6 | ODO2_ECOLI | * P13001 | P0AFG6 | bioh_ecoli | odo2_ecoli |
| P0AFG6 | ODO2_ECOLI | * P76316 | P0AFG6 | dcyd_ecoli | odo2_ecoli |
| P0AFG6 | ODO2_ECOLI | * P76316 | P0AFG6 | dcyd_ecoli | odo2_ecoli |
| P0AFG6 | ODO2_ECOLI | * P08622 | P0AFG6 | dnaj_ecoli | odo2_ecoli |
| P0AFG6 | ODO2_ECOLI | * P0A6Q3 | P0AFG6 | faba_ecoli | odo2_ecoli |
| P0AFG6 | ODO2_ECOLI | * P37005 | P0AFG6 | last_ecoli | odo2_ecoli |
| P0AFG6 | ODO2_ECOLI | * P04816 | P0AFG6 | livk_ecoli | odo2_ecoli |
| P0AFG6 | ODO2_ECOLI | * P0A725 | P0AFG6 | lpxc_ecoli | odo2_ecoli |
| P0AFG6 | ODO2_ECOLI | * P0AFG0 | P0AFG6 | nusg_ecoli | odo2_ecoli |
| P0AFG6 | ODO2_ECOLI | * P0ADY1 | P0AFG6 | ppid_ecoli | odo2_ecoli |
| P0AFG6 | ODO2_ECOLI | * P0A836 | P0AFG6 | succ_ecoli | odo2_ecoli |
| P0AFG6 | ODO2_ECOLI | * P0AGJ9 | P0AFG6 | syy_ecoli  | odo2_ecoli |
| P0AFG6 | ODO2_ECOLI | * P0A850 | P0AFG6 | tig_ecoli  | odo2_ecoli |
| P0AFG6 | ODO2_ECOLI | * P0A8G0 | P0AFG6 | uvrc_ecoli | odo2_ecoli |
| P0AFG6 | ODO2_ECOLI | * P77301 | P0AFG6 | ybap_ecoli | odo2_ecoli |
| P0AFG6 | ODO2_ECOLI | * P12994 | P0AFG6 | ybhb_ecoli | odo2_ecoli |
| P0AFG6 | ODO2_ECOLI | * P46130 | P0AFG6 | ybhc_ecoli | odo2_ecoli |
| P0AFG6 | ODO2_ECOLI | * P22525 | P0AFG6 | ycbb_ecoli | odo2_ecoli |
| P0AFG6 | ODO2_ECOLI | * P75990 | P0AFG6 | ycgf_ecoli | odo2_ecoli |
| P0AFG6 | ODO2_ECOLI | * P77721 | P0AFG6 | ydjf_ecoli | odo2_ecoli |

|        |            |   |        |        |            |            |
|--------|------------|---|--------|--------|------------|------------|
| POAFG6 | ODO2_ECOLI | * | P77704 | POAFG6 | ydji_ecoli | odo2_ecoli |
| POAFG6 | ODO2_ECOLI | * | P64540 | POAFG6 | yfcl_ecoli | odo2_ecoli |
| POAFG6 | ODO2_ECOLI | * | P46852 | POAFG6 | yhhw_ecoli | odo2_ecoli |
| POAFG6 | ODO2_ECOLI | * | P45465 | POAFG6 | yran_ecoli | odo2_ecoli |
| POAFG8 | ODP1_ECOLI | * | P00363 | POAFG9 | frda_ecoli | odp1_eco57 |
| POAFG8 | ODP1_ECOLI | * | P0A915 | POAFG9 | ompw_ecoli | odp1_eco57 |
| POAFG8 | ODP1_ECOLI | * | P0A6A8 | POAFG8 | acp_ecoli  | odp1_ecoli |
| POAFG8 | ODP1_ECOLI | * | P46883 | POAFG8 | amo_ecoli  | odp1_ecoli |
| POAFG8 | ODP1_ECOLI | * | P08202 | POAFG8 | araa_ecoli | odp1_ecoli |
| POAFG8 | ODP1_ECOLI | * | P0AE60 | POAFG8 | ceda_ecoli | odp1_ecoli |
| POAFG8 | ODP1_ECOLI | * | P0AE67 | POAFG8 | chey_ecoli | odp1_ecoli |
| POAFG8 | ODP1_ECOLI | * | P0AE67 | POAFG8 | chey_ecoli | odp1_ecoli |
| POAFG8 | ODP1_ECOLI | * | P0A6G7 | POAFG8 | clpp_ecoli | odp1_ecoli |
| POAFG8 | ODP1_ECOLI | * | P76291 | POAFG8 | cmob_ecoli | odp1_ecoli |
| POAFG8 | ODP1_ECOLI | * | P36995 | POAFG8 | cspb_ecoli | odp1_ecoli |
| POAFG8 | ODP1_ECOLI | * | P0A968 | POAFG8 | cspd_ecoli | odp1_ecoli |
| POAFG8 | ODP1_ECOLI | * | P0A9P6 | POAFG8 | dead_ecoli | odp1_ecoli |
| POAFG8 | ODP1_ECOLI | * | P0A9P6 | POAFG8 | dead_ecoli | odp1_ecoli |
| POAFG8 | ODP1_ECOLI | * | P0A9P0 | POAFG8 | dldh_ecoli | odp1_ecoli |
| POAFG8 | ODP1_ECOLI | * | P0AEE8 | POAFG8 | dma_ecoli  | odp1_ecoli |
| POAFG8 | ODP1_ECOLI | * | P0ACB0 | POAFG8 | dnab_ecoli | odp1_ecoli |
| POAFG8 | ODP1_ECOLI | * | P08622 | POAFG8 | dnaj_ecoli | odp1_ecoli |
| POAFG8 | ODP1_ECOLI | * | P15042 | POAFG8 | dnlj_ecoli | odp1_ecoli |
| POAFG8 | ODP1_ECOLI | * | P33371 | POAFG8 | dusc_ecoli | odp1_ecoli |
| POAFG8 | ODP1_ECOLI | * | P77488 | POAFG8 | dxs_ecoli  | odp1_ecoli |
| POAFG8 | ODP1_ECOLI | * | P32177 | POAFG8 | fdhd_ecoli | odp1_ecoli |
| POAFG8 | ODP1_ECOLI | * | P24183 | POAFG8 | fdng_ecoli | odp1_ecoli |
| POAFG8 | ODP1_ECOLI | * | P24183 | POAFG8 | fdng_ecoli | odp1_ecoli |
| POAFG8 | ODP1_ECOLI | * | P0ABH0 | POAFG8 | ftsa_ecoli | odp1_ecoli |
| POAFG8 | ODP1_ECOLI | * | P46889 | POAFG8 | ftsk_ecoli | odp1_ecoli |
| POAFG8 | ODP1_ECOLI | * | P14407 | POAFG8 | fumb_ecoli | odp1_ecoli |
| POAFG8 | ODP1_ECOLI | * | P05852 | POAFG8 | gcp_ecoli  | odp1_ecoli |
| POAFG8 | ODP1_ECOLI | * | P0A6W5 | POAFG8 | grea_ecoli | odp1_ecoli |
| POAFG8 | ODP1_ECOLI | * | P0ACF8 | POAFG8 | hns_ecoli  | odp1_ecoli |
| POAFG8 | ODP1_ECOLI | * | P28631 | POAFG8 | holb_ecoli | odp1_ecoli |
| POAFG8 | ODP1_ECOLI | * | P43329 | POAFG8 | hrpa_ecoli | odp1_ecoli |
| POAFG8 | ODP1_ECOLI | * | P0AEV9 | POAFG8 | hyci_ecoli | odp1_ecoli |
| POAFG8 | ODP1_ECOLI | * | P08142 | POAFG8 | ilvb_ecoli | odp1_ecoli |
| POAFG8 | ODP1_ECOLI | * | P08142 | POAFG8 | ilvb_ecoli | odp1_ecoli |
| POAFG8 | ODP1_ECOLI | * | P0A9H3 | POAFG8 | ldci_ecoli | odp1_ecoli |
| POAFG8 | ODP1_ECOLI | * | P61316 | POAFG8 | lola_ecoli | odp1_ecoli |
| POAFG8 | ODP1_ECOLI | * | P25522 | POAFG8 | mnme_ecoli | odp1_ecoli |
| POAFG8 | ODP1_ECOLI | * | P25522 | POAFG8 | mnme_ecoli | odp1_ecoli |
| POAFG8 | ODP1_ECOLI | * | P24205 | POAFG8 | msbb_ecoli | odp1_ecoli |

|        |            |          |        |            |            |
|--------|------------|----------|--------|------------|------------|
| POAFG8 | ODP1_ECOLI | * P33937 | POAFG8 | napa_ecoli | odp1_ecoli |
| POAFG8 | ODP1_ECOLI | * P33593 | POAFG8 | nikd_ecoli | odp1_ecoli |
| POAFG8 | ODP1_ECOLI | * P0AFC0 | POAFG8 | nudb_ecoli | odp1_ecoli |
| POAFG8 | ODP1_ECOLI | * P37128 | POAFG8 | nudk_ecoli | odp1_ecoli |
| POAFG8 | ODP1_ECOLI | * P0AFF6 | POAFG8 | nusa_ecoli | odp1_ecoli |
| POAFG8 | ODP1_ECOLI | * P0AFH0 | POAFG8 | ogt_ecoli  | odp1_ecoli |
| POAFG8 | ODP1_ECOLI | * P0ACL9 | POAFG8 | pdhr_ecoli | odp1_ecoli |
| POAFG8 | ODP1_ECOLI | * P0A9K3 | POAFG8 | phol_ecoli | odp1_ecoli |
| POAFG8 | ODP1_ECOLI | * P07004 | POAFG8 | proa_ecoli | odp1_ecoli |
| POAFG8 | ODP1_ECOLI | * P37906 | POAFG8 | puub_ecoli | odp1_ecoli |
| POAFG8 | ODP1_ECOLI | * P15032 | POAFG8 | rece_ecoli | odp1_ecoli |
| POAFG8 | ODP1_ECOLI | * P21893 | POAFG8 | recj_ecoli | odp1_ecoli |
| POAFG8 | ODP1_ECOLI | * P15043 | POAFG8 | recq_ecoli | odp1_ecoli |
| POAFG8 | ODP1_ECOLI | * P0AG20 | POAFG8 | rela_ecoli | odp1_ecoli |
| POAFG8 | ODP1_ECOLI | * P0A8J8 | POAFG8 | rhlb_ecoli | odp1_ecoli |
| POAFG8 | ODP1_ECOLI | * P0AG40 | POAFG8 | ribf_ecoli | odp1_ecoli |
| POAFG8 | ODP1_ECOLI | * P36979 | POAFG8 | rlmn_ecoli | odp1_ecoli |
| POAFG8 | ODP1_ECOLI | * P37765 | POAFG8 | rlub_ecoli | odp1_ecoli |
| POAFG8 | ODP1_ECOLI | * P0AA39 | POAFG8 | rluc_ecoli | odp1_ecoli |
| POAFG8 | ODP1_ECOLI | * P0A7Y4 | POAFG8 | rnh_ecoli  | odp1_ecoli |
| POAFG8 | ODP1_ECOLI | * P0A7Z4 | POAFG8 | rpoa_ecoli | odp1_ecoli |
| POAFG8 | ODP1_ECOLI | * P39286 | POAFG8 | rsga_ecoli | odp1_ecoli |
| POAFG8 | ODP1_ECOLI | * P0A6U5 | POAFG8 | rsmg_ecoli | odp1_ecoli |
| POAFG8 | ODP1_ECOLI | * P0A6U5 | POAFG8 | rsmg_ecoli | odp1_ecoli |
| POAFG8 | ODP1_ECOLI | * P0A812 | POAFG8 | ruvb_ecoli | odp1_ecoli |
| POAFG8 | ODP1_ECOLI | * P14081 | POAFG8 | selb_ecoli | odp1_ecoli |
| POAFG8 | ODP1_ECOLI | * P76072 | POAFG8 | stfr_ecoli | odp1_ecoli |
| POAFG8 | ODP1_ECOLI | * P0AG78 | POAFG8 | subi_ecoli | odp1_ecoli |
| POAFG8 | ODP1_ECOLI | * P16659 | POAFG8 | syp_ecoli  | odp1_ecoli |
| POAFG8 | ODP1_ECOLI | * P11875 | POAFG8 | syr_ecoli  | odp1_ecoli |
| POAFG8 | ODP1_ECOLI | * P0A847 | POAFG8 | tgt_ecoli  | odp1_ecoli |
| POAFG8 | ODP1_ECOLI | * P0A850 | POAFG8 | tig_ecoli  | odp1_ecoli |
| POAFG8 | ODP1_ECOLI | * P23003 | POAFG8 | trma_ecoli | odp1_ecoli |
| POAFG8 | ODP1_ECOLI | * P0A8I5 | POAFG8 | trmb_ecoli | odp1_ecoli |
| POAFG8 | ODP1_ECOLI | * P00895 | POAFG8 | trpe_ecoli | odp1_ecoli |
| POAFG8 | ODP1_ECOLI | * P0A890 | POAFG8 | tusa_ecoli | odp1_ecoli |
| POAFG8 | ODP1_ECOLI | * P26602 | POAFG8 | ubic_ecoli | odp1_ecoli |
| POAFG8 | ODP1_ECOLI | * P0A8G0 | POAFG8 | uvrc_ecoli | odp1_ecoli |
| POAFG8 | ODP1_ECOLI | * P03018 | POAFG8 | uvrd_ecoli | odp1_ecoli |
| POAFG8 | ODP1_ECOLI | * P0A9U1 | POAFG8 | ybhf_ecoli | odp1_ecoli |
| POAFG8 | ODP1_ECOLI | * P0A9U1 | POAFG8 | ybhf_ecoli | odp1_ecoli |
| POAFG8 | ODP1_ECOLI | * P75767 | POAFG8 | ybhk_ecoli | odp1_ecoli |
| POAFG8 | ODP1_ECOLI | * P75990 | POAFG8 | ycgf_ecoli | odp1_ecoli |
| POAFG8 | ODP1_ECOLI | * P75990 | POAFG8 | ycgf_ecoli | odp1_ecoli |
| POAFG8 | ODP1_ECOLI | * P0A8L7 | POAFG8 | yciu_ecoli | odp1_ecoli |



|        |            |   |        |        |                            |                            |
|--------|------------|---|--------|--------|----------------------------|----------------------------|
| P0AFG8 | ODP1_ECOLI | * | P0A8L7 | P0AFG8 | <a href="#">yciu_ecoli</a> | <a href="#">odp1_ecoli</a> |
| P0AFG8 | ODP1_ECOLI | * | P76049 | P0AFG8 | <a href="#">ycjy_ecoli</a> | <a href="#">odp1_ecoli</a> |
| P0AFG8 | ODP1_ECOLI | * | P77302 | P0AFG8 | <a href="#">ydam_ecoli</a> | <a href="#">odp1_ecoli</a> |
| P0AFG8 | ODP1_ECOLI | * | P33666 | P0AFG8 | <a href="#">ydba_ecoli</a> | <a href="#">odp1_ecoli</a> |
| P0AFG8 | ODP1_ECOLI | * | P77564 | P0AFG8 | <a href="#">ydhw_ecoli</a> | <a href="#">odp1_ecoli</a> |
| P0AFG8 | ODP1_ECOLI | * | P0A8A4 | P0AFG8 | <a href="#">ydia_ecoli</a> | <a href="#">odp1_ecoli</a> |
| P0AFG8 | ODP1_ECOLI | * | P52126 | P0AFG8 | <a href="#">yfjk_ecoli</a> | <a href="#">odp1_ecoli</a> |
| P0AFG8 | ODP1_ECOLI | * | P38036 | P0AFG8 | <a href="#">ygcb_ecoli</a> | <a href="#">odp1_ecoli</a> |
| P0AFG8 | ODP1_ECOLI | * | P30871 | P0AFG8 | <a href="#">ygif_ecoli</a> | <a href="#">odp1_ecoli</a> |
| P0AFG8 | ODP1_ECOLI | * | P45527 | P0AFG8 | <a href="#">yhbu_ecoli</a> | <a href="#">odp1_ecoli</a> |
| P0AFG8 | ODP1_ECOLI | * | P37634 | P0AFG8 | <a href="#">yhir_ecoli</a> | <a href="#">odp1_ecoli</a> |
| P0AFG8 | ODP1_ECOLI | * | P0A8N7 | P0AFG8 | <a href="#">yjea_ecoli</a> | <a href="#">odp1_ecoli</a> |
| P0AFG8 | ODP1_ECOLI | * | P76170 | P0AFG8 | <a href="#">ynfb_ecoli</a> | <a href="#">odp1_ecoli</a> |
| P0AFG8 | ODP1_ECOLI | * | P76257 | P0AFG8 | <a href="#">yoaa_ecoli</a> | <a href="#">odp1_ecoli</a> |
| P0AFG8 | ODP1_ECOLI | * | P45465 | P0AFG8 | <a href="#">yran_ecoli</a> | <a href="#">odp1_ecoli</a> |
| P0AFG8 | ODP1_ECOLI | * | P0A9X1 | P0AFG8 | <a href="#">znuc_ecoli</a> | <a href="#">odp1_ecoli</a> |
|        |            |   |        |        |                            |                            |
| P06959 | ODP2_ECOLI | * | P0A6A8 | P06959 | <a href="#">acp_ecoli</a>  | <a href="#">odp2_ecoli</a> |
| P06959 | ODP2_ECOLI | * | P33224 | P06959 | <a href="#">aidb_ecoli</a> | <a href="#">odp2_ecoli</a> |
| P06959 | ODP2_ECOLI | * | P33224 | P06959 | <a href="#">aidb_ecoli</a> | <a href="#">odp2_ecoli</a> |
| P06959 | ODP2_ECOLI | * | P0AE60 | P06959 | <a href="#">ceda_ecoli</a> | <a href="#">odp2_ecoli</a> |
| P06959 | ODP2_ECOLI | * | P0AE60 | P06959 | <a href="#">ceda_ecoli</a> | <a href="#">odp2_ecoli</a> |
| P06959 | ODP2_ECOLI | * | P0AE67 | P06959 | <a href="#">chey_ecoli</a> | <a href="#">odp2_ecoli</a> |
| P06959 | ODP2_ECOLI | * | P0AE67 | P06959 | <a href="#">chey_ecoli</a> | <a href="#">odp2_ecoli</a> |
| P06959 | ODP2_ECOLI | * | P36995 | P06959 | <a href="#">cspb_ecoli</a> | <a href="#">odp2_ecoli</a> |
| P06959 | ODP2_ECOLI | * | P0AED9 | P06959 | <a href="#">dcm_ecoli</a>  | <a href="#">odp2_ecoli</a> |
| P06959 | ODP2_ECOLI | * | P0A9P0 | P06959 | <a href="#">dldh_ecoli</a> | <a href="#">odp2_ecoli</a> |
| P06959 | ODP2_ECOLI | * | P77399 | P06959 | <a href="#">fadj_ecoli</a> | <a href="#">odp2_ecoli</a> |
| P06959 | ODP2_ECOLI | * | P32177 | P06959 | <a href="#">fdhd_ecoli</a> | <a href="#">odp2_ecoli</a> |
| P06959 | ODP2_ECOLI | * | P0ADH5 | P06959 | <a href="#">fimb_ecoli</a> | <a href="#">odp2_ecoli</a> |
| P06959 | ODP2_ECOLI | * | P0AES4 | P06959 | <a href="#">gyra_ecoli</a> | <a href="#">odp2_ecoli</a> |
| P06959 | ODP2_ECOLI | * | P43329 | P06959 | <a href="#">hrpa_ecoli</a> | <a href="#">odp2_ecoli</a> |
| P06959 | ODP2_ECOLI | * | P37024 | P06959 | <a href="#">hrpb_ecoli</a> | <a href="#">odp2_ecoli</a> |
| P06959 | ODP2_ECOLI | * | P16528 | P06959 | <a href="#">iclr_ecoli</a> | <a href="#">odp2_ecoli</a> |
| P06959 | ODP2_ECOLI | * | P32053 | P06959 | <a href="#">inta_ecoli</a> | <a href="#">odp2_ecoli</a> |
| P06959 | ODP2_ECOLI | * | P32053 | P06959 | <a href="#">inta_ecoli</a> | <a href="#">odp2_ecoli</a> |
| P06959 | ODP2_ECOLI | * | P37326 | P06959 | <a href="#">ints_ecoli</a> | <a href="#">odp2_ecoli</a> |
| P06959 | ODP2_ECOLI | * | P37326 | P06959 | <a href="#">ints_ecoli</a> | <a href="#">odp2_ecoli</a> |
| P06959 | ODP2_ECOLI | * | P0A9I5 | P06959 | <a href="#">napd_ecoli</a> | <a href="#">odp2_ecoli</a> |
| P06959 | ODP2_ECOLI | * | P0AF26 | P06959 | <a href="#">narj_ecoli</a> | <a href="#">odp2_ecoli</a> |
| P06959 | ODP2_ECOLI | * | P68739 | P06959 | <a href="#">nfi_ecoli</a>  | <a href="#">odp2_ecoli</a> |
| P06959 | ODP2_ECOLI | * | P68739 | P06959 | <a href="#">nfi_ecoli</a>  | <a href="#">odp2_ecoli</a> |
| P06959 | ODP2_ECOLI | * | P0AFH0 | P06959 | <a href="#">ogt_ecoli</a>  | <a href="#">odp2_ecoli</a> |
| P06959 | ODP2_ECOLI | * | P0C7L2 | P06959 | <a href="#">paaj_ecoli</a> | <a href="#">odp2_ecoli</a> |
| P06959 | ODP2_ECOLI | * | P76086 | P06959 | <a href="#">paax_ecoli</a> | <a href="#">odp2_ecoli</a> |

|        |            |   |        |        |            |            |
|--------|------------|---|--------|--------|------------|------------|
| P06959 | ODP2_ECOLI | * | P0AFI2 | P06959 | parc_ecoli | odp2_ecoli |
| P06959 | ODP2_ECOLI | * | P0ACL9 | P06959 | pdhr_ecoli | odp2_ecoli |
| P06959 | ODP2_ECOLI | * | P0A9K3 | P06959 | phol_ecoli | odp2_ecoli |
| P06959 | ODP2_ECOLI | * | P0A9K3 | P06959 | phol_ecoli | odp2_ecoli |
| P06959 | ODP2_ECOLI | * | P00490 | P06959 | phsm_ecoli | odp2_ecoli |
| P06959 | ODP2_ECOLI | * | P00490 | P06959 | phsm_ecoli | odp2_ecoli |
| P06959 | ODP2_ECOLI | * | P0ADI0 | P06959 | pinr_ecoli | odp2_ecoli |
| P06959 | ODP2_ECOLI | * | P0ADI0 | P06959 | pinr_ecoli | odp2_ecoli |
| P06959 | ODP2_ECOLI | * | P0A7B1 | P06959 | ppk_ecoli  | odp2_ecoli |
| P06959 | ODP2_ECOLI | * | P0AA53 | P06959 | qmca_ecoli | odp2_ecoli |
| P06959 | ODP2_ECOLI | * | P24230 | P06959 | recg_ecoli | odp2_ecoli |
| P06959 | ODP2_ECOLI | * | P21893 | P06959 | recj_ecoli | odp2_ecoli |
| P06959 | ODP2_ECOLI | * | P15043 | P06959 | recq_ecoli | odp2_ecoli |
| P06959 | ODP2_ECOLI | * | P15043 | P06959 | recq_ecoli | odp2_ecoli |
| P06959 | ODP2_ECOLI | * | P0C0R7 | P06959 | rlme_ecoli | odp2_ecoli |
| P06959 | ODP2_ECOLI | * | P36979 | P06959 | rlmn_ecoli | odp2_ecoli |
| P06959 | ODP2_ECOLI | * | P0AA39 | P06959 | rluc_ecoli | odp2_ecoli |
| P06959 | ODP2_ECOLI | * | P0A7Y4 | P06959 | rnh_ecoli  | odp2_ecoli |
| P06959 | ODP2_ECOLI | * | P0A7Y4 | P06959 | rnh_ecoli  | odp2_ecoli |
| P06959 | ODP2_ECOLI | * | P0A7Y8 | P06959 | rnpa_ecoli | odp2_ecoli |
| P06959 | ODP2_ECOLI | * | P30014 | P06959 | rnt_ecoli  | odp2_ecoli |
| P06959 | ODP2_ECOLI | * | P0A7Z4 | P06959 | rpoa_ecoli | odp2_ecoli |
| P06959 | ODP2_ECOLI | * | P0A6U5 | P06959 | rsmg_ecoli | odp2_ecoli |
| P06959 | ODP2_ECOLI | * | P67087 | P06959 | rsmi_ecoli | odp2_ecoli |
| P06959 | ODP2_ECOLI | * | P14081 | P06959 | selb_ecoli | odp2_ecoli |
| P06959 | ODP2_ECOLI | * | P68398 | P06959 | tada_ecoli | odp2_ecoli |
| P06959 | ODP2_ECOLI | * | P0A847 | P06959 | tgt_ecoli  | odp2_ecoli |
| P06959 | ODP2_ECOLI | * | P07604 | P06959 | tyrr_ecoli | odp2_ecoli |
| P06959 | ODP2_ECOLI | * | P26602 | P06959 | ubic_ecoli | odp2_ecoli |
| P06959 | ODP2_ECOLI | * | P0A9W0 | P06959 | ular_ecoli | odp2_ecoli |
| P06959 | ODP2_ECOLI | * | P0A8F8 | P06959 | uvrb_ecoli | odp2_ecoli |
| P06959 | ODP2_ECOLI | * | P0A8F8 | P06959 | uvrb_ecoli | odp2_ecoli |
| P06959 | ODP2_ECOLI | * | P03018 | P06959 | uvrd_ecoli | odp2_ecoli |
| P06959 | ODP2_ECOLI | * | P0AAS7 | P06959 | ybcj_ecoli | odp2_ecoli |
| P06959 | ODP2_ECOLI | * | P0AAS7 | P06959 | ybcj_ecoli | odp2_ecoli |
| P06959 | ODP2_ECOLI | * | P0A9U1 | P06959 | ybhf_ecoli | odp2_ecoli |
| P06959 | ODP2_ECOLI | * | P75829 | P06959 | ybjx_ecoli | odp2_ecoli |
| P06959 | ODP2_ECOLI | * | P24188 | P06959 | ycea_ecoli | odp2_ecoli |
| P06959 | ODP2_ECOLI | * | P75990 | P06959 | ycgf_ecoli | odp2_ecoli |
| P06959 | ODP2_ECOLI | * | P0A8L7 | P06959 | yciu_ecoli | odp2_ecoli |
| P06959 | ODP2_ECOLI | * | P77302 | P06959 | ydam_ecoli | odp2_ecoli |
| P06959 | ODP2_ECOLI | * | P30871 | P06959 | ygif_ecoli | odp2_ecoli |
| P06959 | ODP2_ECOLI | * | P45527 | P06959 | yhbu_ecoli | odp2_ecoli |
| P06959 | ODP2_ECOLI | * | P0ADK8 | P06959 | yibl_ecoli | odp2_ecoli |
| P06959 | ODP2_ECOLI | * | P0A8N7 | P06959 | yjea_ecoli | odp2_ecoli |

|        |            |   |        |        |             |            |
|--------|------------|---|--------|--------|-------------|------------|
| P06959 | ODP2_ECOLI | * | P31806 | P06959 | yjef_ecoli  | odp2_ecoli |
| P06959 | ODP2_ECOLI | * | P31806 | P06959 | yjef_ecoli  | odp2_ecoli |
| P06959 | ODP2_ECOLI | * | P0AF90 | P06959 | yjgd_ecoli  | odp2_ecoli |
| P06959 | ODP2_ECOLI | * | P45465 | P06959 | yrans_ecoli | odp2_ecoli |
| P06959 | ODP2_ECOLI | * | P0A9X1 | P06959 | znuc_ecoli  | odp2_ecoli |
| P0A910 | OMPA_ECOLI | * | P78285 | P0A910 | lysd_ecoli  | ompa_ecoli |
| P0A910 | OMPA_ECOLI | * | P0A9X4 | P0A910 | mreb_ecoli  | ompa_ecoli |
| P0A910 | OMPA_ECOLI | * | P0AF26 | P0A910 | narj_ecoli  | ompa_ecoli |
| P0A910 | OMPA_ECOLI | * | P0A910 | P0A910 | ompa_ecoli  | ompa_ecoli |
| P0A910 | OMPA_ECOLI | * | P37095 | P0A910 | pepb_ecoli  | ompa_ecoli |
| P0A910 | OMPA_ECOLI | * | P0AA25 | P0A910 | thio_ecoli  | ompa_ecoli |
| P0A910 | OMPA_ECOLI | * | P0A850 | P0A910 | tig_ecoli   | ompa_ecoli |
| P0A910 | OMPA_ECOLI | * | P0A850 | P0A910 | tig_ecoli   | ompa_ecoli |
| P0A910 | OMPA_ECOLI | * | P05847 | P0A910 | ttda_ecoli  | ompa_ecoli |
| P0A910 | OMPA_ECOLI | * | P30871 | P0A910 | ygif_ecoli  | ompa_ecoli |
| P0A910 | OMPA_ECOLI | * | P30871 | P0A910 | ygif_ecoli  | ompa_ecoli |
| P06996 | OMPC_ECOLI | * | P0C054 | P06996 | ibpa_ecoli  | ompc_ecoli |
| P06996 | OMPC_ECOLI | * | P0A9X4 | P06996 | mreb_ecoli  | ompc_ecoli |
| P06996 | OMPC_ECOLI | * | P36979 | P06996 | rlmn_ecoli  | ompc_ecoli |
| P06996 | OMPC_ECOLI | * | P0AA25 | P06996 | thio_ecoli  | ompc_ecoli |
| P06996 | OMPC_ECOLI | * | P30871 | P06996 | ygif_ecoli  | ompc_ecoli |
| P0AA16 | OMPR_ECOLI | * | P0A756 | P0AA16 | kefg_ecoli  | ompr_ecoli |
| P0AA16 | OMPR_ECOLI | * | P0A9J6 | P0AA16 | rbsk_ecoli  | ompr_ecoli |
| P0AA16 | OMPR_ECOLI | * | P0AA25 | P0AA16 | thio_ecoli  | ompr_ecoli |
| P0AA16 | OMPR_ECOLI | * | P64588 | P0AA16 | yqji_ecoli  | ompr_ecoli |
| P09169 | OMPT_ECOLI |   | none   |        |             |            |
| P27298 | OPDA_ECOLI | * | P42641 | P27298 | obg_ecoli   | opda_ecoli |
| P33136 | OPGG_ECOLI | * | P06989 | P33136 | his2_ecoli  | opgg_ecoli |
| P33136 | OPGG_ECOLI | * | P0A850 | P33136 | tig_ecoli   | opgg_ecoli |
| P23843 | OPPA_ECOLI |   | none   |        |             |            |
| P0A784 | ORN_ECOLI  |   | none   |        |             |            |
| P0C0L2 | OSMC_ECOLI |   | none   |        |             |            |
| P33362 | OSMF_ECOLI | * | P0AGJ5 | P33362 | yfif_ecoli  | osmf_ecoli |
| P31677 | OTSA_ECOLI |   | none   |        |             |            |

|        |            |          |        |            |             |
|--------|------------|----------|--------|------------|-------------|
| P0ACQ4 | OXYR_ECOLI | * P24224 | P0ACQ4 | acps_ecoli | oxyr_ecoli  |
| P31663 | PANC_ECOLI | * P33937 | P31663 | napa_ecoli | panc_ecoli  |
| P31663 | PANC_ECOLI | * P0A790 | P31663 | pand_ecoli | panc_ecoli  |
| P31663 | PANC_ECOLI | * P27431 | P31663 | ycfd_ecoli | panc_ecoli  |
| P31663 | PANC_ECOLI | * P65556 | P31663 | yfcd_ecoli | panc_ecoli  |
| P31663 | PANC_ECOLI | * P65556 | P31663 | yfcd_ecoli | panc_ecoli  |
| P0AFI2 | PARC_ECOLI | * P22523 | P0AFI2 | mukb_ecoli | parc_ecoli  |
| P0AFI2 | PARC_ECOLI | * P20083 | P0AFI2 | pare_ecoli | parc_ecoli  |
| P0AFI2 | PARC_ECOLI | * P28043 | P0AFI2 | ssb2_ecolx | parc_ecoli  |
| P0AFI2 | PARC_ECOLI | * P0A832 | P0AFI2 | ssrp_ecoli | parc_ecoli  |
| P02919 | PBPB_ECOLI | * P29131 | P02919 | ftsn_ecoli | pbpb_ecoli  |
| P02919 | PBPB_ECOLI | * P29131 | P02919 | ftsn_ecoli | pbpb_ecoli  |
| P02919 | PBPB_ECOLI | * P29131 | P02919 | ftsn_ecoli | pbpb_ecoli  |
| P02919 | PBPB_ECOLI | * P07003 | P02919 | poxb_ecoli | pbpb_ecoli  |
| P02919 | PBPB_ECOLI | * P32171 | P02919 | rhab_ecoli | pbpb_ecoli  |
| P22259 | PCKA_ECOLI | * P00350 | P22259 | 6pgd_ecoli | pcka_ecoli  |
| P0ABF1 | PCNB_ECOLI | none     |        |            |             |
| P0ACL9 | PDHR_ECOLI | * P30859 | P0ACL9 | arti_ecoli | pdhr_ecoli  |
| P19624 | PDXA_ECOLI | * P68646 | P19624 | fixx_ecoli | pdx_a_ecoli |
| P19624 | PDXA_ECOLI | * P0AEM0 | P19624 | fkbx_ecoli | pdx_a_ecoli |
| P40191 | PDXK_ECOLI | none     |        |            |             |
| P77150 | PDXY_ECOLI | none     |        |            |             |
| P37095 | PEPB_ECOLI | * P0ABB0 | P37095 | atpa_ecoli | pepb_ecoli  |
| P37095 | PEPB_ECOLI | * P0A6Y8 | P37095 | dnak_ecoli | pepb_ecoli  |
| P37095 | PEPB_ECOLI | * P30130 | P37095 | fimd_ecoli | pepb_ecoli  |
| P37095 | PEPB_ECOLI | * P28630 | P37095 | hola_ecoli | pepb_ecoli  |
| P37095 | PEPB_ECOLI | * P0A6Z1 | P37095 | hsca_ecoli | pepb_ecoli  |
| P37095 | PEPB_ECOLI | * P0A6Z3 | P37095 | htpg_ecoli | pepb_ecoli  |
| P37095 | PEPB_ECOLI | * P04951 | P37095 | kdsb_ecoli | pepb_ecoli  |
| P37095 | PEPB_ECOLI | * P0A749 | P37095 | mura_ecoli | pepb_ecoli  |
| P37095 | PEPB_ECOLI | * P0A7C6 | P37095 | pepe_ecoli | pepb_ecoli  |
| P37095 | PEPB_ECOLI | * P52061 | P37095 | rdgb_ecoli | pepb_ecoli  |
| P37095 | PEPB_ECOLI | * P00579 | P37095 | rpod_ecoli | pepb_ecoli  |
| P37095 | PEPB_ECOLI | * P0A8A4 | P37095 | ydia_ecoli | pepb_ecoli  |

|        |            |          |        |                            |                            |
|--------|------------|----------|--------|----------------------------|----------------------------|
| P37095 | PEPB_ECOLI | * P32151 | P37095 | yiig_ecoli                 | pepb_ecoli                 |
| P15288 | PEPD_ECOLI | * P00350 | P15288 | <a href="#">6pgd_ecoli</a> | <a href="#">pepd_ecoli</a> |
| P15288 | PEPD_ECOLI | * P0A9Q5 | P15288 | <a href="#">accd_ecoli</a> | <a href="#">pepd_ecoli</a> |
| P15288 | PEPD_ECOLI | * P0AB96 | P15288 | <a href="#">arsc_ecoli</a> | <a href="#">pepd_ecoli</a> |
| P15288 | PEPD_ECOLI | * P0AE72 | P15288 | <a href="#">chpr_ecoli</a> | <a href="#">pepd_ecoli</a> |
| P15288 | PEPD_ECOLI | * P0ACF4 | P15288 | <a href="#">dbhb_ecoli</a> | <a href="#">pepd_ecoli</a> |
| P15288 | PEPD_ECOLI | * P0A6L0 | P15288 | <a href="#">deoc_ecoli</a> | <a href="#">pepd_ecoli</a> |
| P15288 | PEPD_ECOLI | * P0ABS1 | P15288 | <a href="#">dksa_ecoli</a> | <a href="#">pepd_ecoli</a> |
| P15288 | PEPD_ECOLI | * P06968 | P15288 | <a href="#">dut_ecoli</a>  | <a href="#">pepd_ecoli</a> |
| P15288 | PEPD_ECOLI | * P0ADI4 | P15288 | <a href="#">entb_ecoli</a> | <a href="#">pepd_ecoli</a> |
| P15288 | PEPD_ECOLI | * P76540 | P15288 | <a href="#">eutk_ecoli</a> | <a href="#">pepd_ecoli</a> |
| P15288 | PEPD_ECOLI | * P0A9R4 | P15288 | <a href="#">fer_ecoli</a>  | <a href="#">pepd_ecoli</a> |
| P15288 | PEPD_ECOLI | * P0A8P3 | P15288 | <a href="#">fetp_ecoli</a> | <a href="#">pepd_ecoli</a> |
| P15288 | PEPD_ECOLI | * P0AEM4 | P15288 | <a href="#">flgm_ecoli</a> | <a href="#">pepd_ecoli</a> |
| P15288 | PEPD_ECOLI | * P43533 | P15288 | <a href="#">flgn_ecoli</a> | <a href="#">pepd_ecoli</a> |
| P15288 | PEPD_ECOLI | * P77609 | P15288 | <a href="#">flxa_ecoli</a> | <a href="#">pepd_ecoli</a> |
| P15288 | PEPD_ECOLI | * P0ACK8 | P15288 | <a href="#">fucr_ecoli</a> | <a href="#">pepd_ecoli</a> |
| P15288 | PEPD_ECOLI | * P0AC53 | P15288 | <a href="#">g6pd_ecoli</a> | <a href="#">pepd_ecoli</a> |
| P15288 | PEPD_ECOLI | * P62707 | P15288 | <a href="#">gpma_ecoli</a> | <a href="#">pepd_ecoli</a> |
| P15288 | PEPD_ECOLI | * P09372 | P15288 | <a href="#">grpe_ecoli</a> | <a href="#">pepd_ecoli</a> |
| P15288 | PEPD_ECOLI | * P0ABS8 | P15288 | <a href="#">hole_ecoli</a> | <a href="#">pepd_ecoli</a> |
| P15288 | PEPD_ECOLI | * P0A6L9 | P15288 | <a href="#">hscb_ecoli</a> | <a href="#">pepd_ecoli</a> |
| P15288 | PEPD_ECOLI | * P19931 | P15288 | <a href="#">hyae_ecoli</a> | <a href="#">pepd_ecoli</a> |
| P15288 | PEPD_ECOLI | * Q46822 | P15288 | <a href="#">idi_ecoli</a>  | <a href="#">pepd_ecoli</a> |
| P15288 | PEPD_ECOLI | * P0ABU0 | P15288 | <a href="#">menb_ecoli</a> | <a href="#">pepd_ecoli</a> |
| P15288 | PEPD_ECOLI | * P25738 | P15288 | <a href="#">msyb_ecoli</a> | <a href="#">pepd_ecoli</a> |
| P15288 | PEPD_ECOLI | * P0A9H1 | P15288 | <a href="#">mug_ecoli</a>  | <a href="#">pepd_ecoli</a> |
| P15288 | PEPD_ECOLI | * P77245 | P15288 | <a href="#">murr_ecoli</a> | <a href="#">pepd_ecoli</a> |
| P15288 | PEPD_ECOLI | * P0A9J4 | P15288 | <a href="#">pane_ecoli</a> | <a href="#">pepd_ecoli</a> |
| P15288 | PEPD_ECOLI | * P37590 | P15288 | <a href="#">pmrd_ecoli</a> | <a href="#">pepd_ecoli</a> |
| P15288 | PEPD_ECOLI | * P18133 | P15288 | <a href="#">pncb_ecoli</a> | <a href="#">pepd_ecoli</a> |
| P15288 | PEPD_ECOLI | * P77541 | P15288 | <a href="#">prpb_ecoli</a> | <a href="#">pepd_ecoli</a> |
| P15288 | PEPD_ECOLI | * P76062 | P15288 | <a href="#">racr_ecoli</a> | <a href="#">pepd_ecoli</a> |
| P15288 | PEPD_ECOLI | * P0C079 | P15288 | <a href="#">relb_ecoli</a> | <a href="#">pepd_ecoli</a> |
| P15288 | PEPD_ECOLI | * P0A7J0 | P15288 | <a href="#">ribb_ecoli</a> | <a href="#">pepd_ecoli</a> |
| P15288 | PEPD_ECOLI | * P45748 | P15288 | <a href="#">rimn_ecoli</a> | <a href="#">pepd_ecoli</a> |
| P15288 | PEPD_ECOLI | * P37146 | P15288 | <a href="#">rir4_ecoli</a> | <a href="#">pepd_ecoli</a> |
| P15288 | PEPD_ECOLI | * P0AGE0 | P15288 | <a href="#">ssb_ecoli</a>  | <a href="#">pepd_ecoli</a> |
| P15288 | PEPD_ECOLI | * P80645 | P15288 | <a href="#">ssud_ecoli</a> | <a href="#">pepd_ecoli</a> |
| P15288 | PEPD_ECOLI | * P0A8F0 | P15288 | <a href="#">upp_ecoli</a>  | <a href="#">pepd_ecoli</a> |
| P15288 | PEPD_ECOLI | * P41039 | P15288 | <a href="#">ybii_ecoli</a> | <a href="#">pepd_ecoli</a> |
| P15288 | PEPD_ECOLI | * P0AB28 | P15288 | <a href="#">yced_ecoli</a> | <a href="#">pepd_ecoli</a> |
| P15288 | PEPD_ECOLI | * P0AB43 | P15288 | <a href="#">ycgl_ecoli</a> | <a href="#">pepd_ecoli</a> |
| P15288 | PEPD_ECOLI | * P21361 | P15288 | <a href="#">ycig_ecoli</a> | <a href="#">pepd_ecoli</a> |

|        |            |   |        |        |            |            |
|--------|------------|---|--------|--------|------------|------------|
| P15288 | PEPD_ECOLI | * | P08245 | P15288 | ycih_ecoli | pepd_ecoli |
| P15288 | PEPD_ECOLI | * | P64463 | P15288 | ydfz_ecoli | pepd_ecoli |
| P15288 | PEPD_ECOLI | * | P64479 | P15288 | ydiz_ecoli | pepd_ecoli |
| P15288 | PEPD_ECOLI | * | P64483 | P15288 | yeak_ecoli | pepd_ecoli |
| P15288 | PEPD_ECOLI | * | P0ACY9 | P15288 | yebg_ecoli | pepd_ecoli |
| P15288 | PEPD_ECOLI | * | P0AD10 | P15288 | yecj_ecoli | pepd_ecoli |
| P15288 | PEPD_ECOLI | * | P33030 | P15288 | yeir_ecoli | pepd_ecoli |
| P15288 | PEPD_ECOLI | * | P76464 | P15288 | yfas_ecoli | pepd_ecoli |
| P15288 | PEPD_ECOLI | * | P77544 | P15288 | yfcf_ecoli | pepd_ecoli |
| P15288 | PEPD_ECOLI | * | P77196 | P15288 | yfcu_ecoli | pepd_ecoli |
| P15288 | PEPD_ECOLI | * | P77656 | P15288 | yfdk_ecoli | pepd_ecoli |
| P15288 | PEPD_ECOLI | * | P52119 | P15288 | yfjf_ecoli | pepd_ecoli |
| P15288 | PEPD_ECOLI | * | P64559 | P15288 | ygyf_ecoli | pepd_ecoli |
| P15288 | PEPD_ECOLI | * | P67080 | P15288 | yggg_ecoli | pepd_ecoli |
| P15288 | PEPD_ECOLI | * | P25536 | P15288 | yhde_ecoli | pepd_ecoli |
| P15288 | PEPD_ECOLI | * | P09996 | P15288 | yidb_ecoli | pepd_ecoli |
| P15288 | PEPD_ECOLI | * | P39279 | P15288 | yjej_ecoli | pepd_ecoli |
| P15288 | PEPD_ECOLI | * | P75992 | P15288 | ymga_ecoli | pepd_ecoli |
| P15288 | PEPD_ECOLI | * | P0A8W5 | P15288 | yqge_ecoli | pepd_ecoli |
| P15288 | PEPD_ECOLI | * | P46857 | P15288 | yrhb_ecoli | pepd_ecoli |
|        |            |   |        |        |            |            |
| P21165 | PEPQ_ECOLI | * | P0ACE0 | P21165 | mbhm_ecoli | pepq_ecoli |
| P21165 | PEPQ_ECOLI | * | P33643 | P21165 | rlud_ecoli | pepq_ecoli |
|        |            |   |        |        |            |            |
| P29745 | PEPT_ECOLI | * | P18335 | P29745 | argd_ecoli | pept_ecoli |
| P29745 | PEPT_ECOLI | * | P0A858 | P29745 | tpis_ecoli | pept_ecoli |
| P29745 | PEPT_ECOLI | * | P0A858 | P29745 | tpis_ecoli | pept_ecoli |
| P29745 | PEPT_ECOLI | * | P38521 | P29745 | yggf_ecoli | pept_ecoli |
|        |            |   |        |        |            |            |
| P0A9N4 | PFLA_ECOLI | * | P26612 | P0A9N4 | amy2_ecoli | pfla_ecoli |
| P0A9N4 | PFLA_ECOLI | * | P45543 | P0A9N4 | frld_ecoli | pfla_ecoli |
| P0A9N4 | PFLA_ECOLI | * | P0AAN3 | P0A9N4 | hypb_ecoli | pfla_ecoli |
| P0A9N4 | PFLA_ECOLI | * | P0AB74 | P0A9N4 | kbay_ecoli | pfla_ecoli |
| P0A9N4 | PFLA_ECOLI | * | P38393 | P0A9N4 | kil_ecoli  | pfla_ecoli |
| P0A9N4 | PFLA_ECOLI | * | P32173 | P0A9N4 | moba_ecoli | pfla_ecoli |
| P0A9N4 | PFLA_ECOLI | * | P28305 | P0A9N4 | pabc_ecoli | pfla_ecoli |
| P0A9N4 | PFLA_ECOLI | * | P31057 | P0A9N4 | panb_ecoli | pfla_ecoli |
| P0A9N4 | PFLA_ECOLI | * | P37909 | P0A9N4 | ybgd_ecoli | pfla_ecoli |
| P0A9N4 | PFLA_ECOLI | * | P30176 | P0A9N4 | ybia_ecoli | pfla_ecoli |
| P0A9N4 | PFLA_ECOLI | * | P0A8N0 | P0A9N4 | ycbg_ecoli | pfla_ecoli |
| P0A9N4 | PFLA_ECOLI | * | P64524 | P0A9N4 | yeev_ecoli | pfla_ecoli |
| P0A9N4 | PFLA_ECOLI | * | P76396 | P0A9N4 | yegl_ecoli | pfla_ecoli |
| P0A9N4 | PFLA_ECOLI | * | P0A9V8 | P0A9N4 | yihu_ecoli | pfla_ecoli |
| P0A9N4 | PFLA_ECOLI | * | P75992 | P0A9N4 | ymga_ecoli | pfla_ecoli |



|        |            |          |        |             |            |
|--------|------------|----------|--------|-------------|------------|
| P09373 | PFLB_ECOLI | * P0ABB8 | P09373 | atma_ecoli  | pflb_ecoli |
| P09373 | PFLB_ECOLI | * P77213 | P09373 | caal_ecoli  | pflb_ecoli |
| P09373 | PFLB_ECOLI | * P06961 | P09373 | cca_ecoli   | pflb_ecoli |
| P09373 | PFLB_ECOLI | * P0ABJ1 | P09373 | cyoa_ecoli  | pflb_ecoli |
| P09373 | PFLB_ECOLI | * P45568 | P09373 | dxr_ecoli   | pflb_ecoli |
| P09373 | PFLB_ECOLI | * P0A9A6 | P09373 | fts_z_ecoli | pflb_ecoli |
| P09373 | PFLB_ECOLI | * P27248 | P09373 | gcst_ecoli  | pflb_ecoli |
| P09373 | PFLB_ECOLI | * P68066 | P09373 | grca_ecoli  | pflb_ecoli |
| P09373 | PFLB_ECOLI | * P68066 | P09373 | grca_ecoli  | pflb_ecoli |
| P09373 | PFLB_ECOLI | * P68066 | P09373 | grca_ecoli  | pflb_ecoli |
| P09373 | PFLB_ECOLI | * P15038 | P09373 | held_ecoli  | pflb_ecoli |
| P09373 | PFLB_ECOLI | * P77319 | P09373 | hsc_c_ecoli | pflb_ecoli |
| P09373 | PFLB_ECOLI | * P0C054 | P09373 | ibpa_ecoli  | pflb_ecoli |
| P09373 | PFLB_ECOLI | * P0C054 | P09373 | ibpa_ecoli  | pflb_ecoli |
| P09373 | PFLB_ECOLI | * P23331 | P09373 | kith_ecoli  | pflb_ecoli |
| P09373 | PFLB_ECOLI | * P0AD61 | P09373 | kpyk1_ecoli | pflb_ecoli |
| P09373 | PFLB_ECOLI | * P21599 | P09373 | kpyk2_ecoli | pflb_ecoli |
| P09373 | PFLB_ECOLI | * P30126 | P09373 | leud_ecoli  | pflb_ecoli |
| P09373 | PFLB_ECOLI | * P29745 | P09373 | pept_ecoli  | pflb_ecoli |
| P09373 | PFLB_ECOLI | * P29745 | P09373 | pept_ecoli  | pflb_ecoli |
| P09373 | PFLB_ECOLI | * P29745 | P09373 | pept_ecoli  | pflb_ecoli |
| P09373 | PFLB_ECOLI | * P23869 | P09373 | ppib_ecoli  | pflb_ecoli |
| P09373 | PFLB_ECOLI | * P15033 | P09373 | racc_ecoli  | pflb_ecoli |
| P09373 | PFLB_ECOLI | * P60723 | P09373 | rl4_ecoli   | pflb_ecoli |
| P09373 | PFLB_ECOLI | * P15082 | P09373 | srlr_ecoli  | pflb_ecoli |
| P09373 | PFLB_ECOLI | * P0ACA3 | P09373 | sspa_ecoli  | pflb_ecoli |
| P09373 | PFLB_ECOLI | * P77689 | P09373 | sufd_ecoli  | pflb_ecoli |
| P09373 | PFLB_ECOLI | * P0A8N5 | P09373 | syk2_ecoli  | pflb_ecoli |
| P09373 | PFLB_ECOLI | * P0A8N5 | P09373 | syk2_ecoli  | pflb_ecoli |
| P09373 | PFLB_ECOLI | * P0A850 | P09373 | tig_ecoli   | pflb_ecoli |
| P09373 | PFLB_ECOLI | * P0A858 | P09373 | tpis_ecoli  | pflb_ecoli |
| P09373 | PFLB_ECOLI | * P0A858 | P09373 | tpis_ecoli  | pflb_ecoli |
| P09373 | PFLB_ECOLI | * P0AAQ2 | P09373 | yajd_ecoli  | pflb_ecoli |
| P09373 | PFLB_ECOLI | * P77174 | P09373 | ybdm_ecoli  | pflb_ecoli |
| P09373 | PFLB_ECOLI | * P41039 | P09373 | ybii_ecoli  | pflb_ecoli |
| P09373 | PFLB_ECOLI | * P27431 | P09373 | ycfd_ecoli  | pflb_ecoli |
| P09373 | PFLB_ECOLI | * P64463 | P09373 | ydfz_ecoli  | pflb_ecoli |
| P09373 | PFLB_ECOLI | * P0AD33 | P09373 | yfcz_ecoli  | pflb_ecoli |
| P09373 | PFLB_ECOLI | * P32162 | P09373 | yiis_ecoli  | pflb_ecoli |
| P09373 | PFLB_ECOLI | * P0AF67 | P09373 | yjee_ecoli  | pflb_ecoli |
| P09373 | PFLB_ECOLI | * P39279 | P09373 | yjej_ecoli  | pflb_ecoli |
|        |            |          |        |             |            |
| P0A799 | PGK_ECOLI  | * P0AE08 | P0A799 | ahpc_ecoli  | pgk_ecoli  |
| P0A799 | PGK_ECOLI  | * P15038 | P0A799 | held_ecoli  | pgk_ecoli  |
| P0A799 | PGK_ECOLI  | * P05055 | P0A799 | pngp_ecoli  | pgk_ecoli  |

|        |             |   |        |        |                             |                            |
|--------|-------------|---|--------|--------|-----------------------------|----------------------------|
| P0A799 | PGK_ECOLI   | * | P69797 | P0A799 | <a href="#">ptnab_ecoli</a> | <a href="#">pgk_ecoli</a>  |
| P0A799 | PGK_ECOLI   | * | P0A8N5 | P0A799 | <a href="#">syk2_ecoli</a>  | <a href="#">pgk_ecoli</a>  |
| P0A799 | PGK_ECOLI   | * | P08390 | P0A799 | <a href="#">usg_ecoli</a>   | <a href="#">pgk_ecoli</a>  |
| P36938 | PGM_ECOLI   | * | P0A9Q5 | P36938 | <a href="#">accd_ecoli</a>  | <a href="#">pgm_ecoli</a>  |
| P36938 | PGM_ECOLI   | * | P24171 | P36938 | <a href="#">dcp_ecoli</a>   | <a href="#">pgm_ecoli</a>  |
| P36938 | PGM_ECOLI   | * | P0AC53 | P36938 | <a href="#">g6pd_ecoli</a>  | <a href="#">pgm_ecoli</a>  |
| P36938 | PGM_ECOLI   | * | P37666 | P36938 | <a href="#">ghrb_ecoli</a>  | <a href="#">pgm_ecoli</a>  |
| P36938 | PGM_ECOLI   | * | P21499 | P36938 | <a href="#">rnr_ecoli</a>   | <a href="#">pgm_ecoli</a>  |
| P36938 | PGM_ECOLI   | * | P77489 | P36938 | <a href="#">yagr_ecoli</a>  | <a href="#">pgm_ecoli</a>  |
| P77366 | PGMB_ECOLI  | * | P0A8V0 | P77366 | <a href="#">rnz_ecoli</a>   | <a href="#">pgmb_ecoli</a> |
| P0AFJ1 | PHNA_ECOLI  | * | P24218 | P0AFJ1 | <a href="#">intd_ecoli</a>  | <a href="#">phna_ecoli</a> |
| P0AFJ1 | PHNA_ECOLI  | * | P21645 | P0AFJ1 | <a href="#">lpxd_ecoli</a>  | <a href="#">phna_ecoli</a> |
| P16681 | PHNB_ECOLI  |   | none   |        |                             |                            |
| P0A9K3 | PHOL_ECOLI  | * | P0A8I5 | P0A9K3 | <a href="#">trmb_ecoli</a>  | <a href="#">phol_ecoli</a> |
| P0A9K3 | PHOL_ECOLI  | * | P0A898 | P0A9K3 | <a href="#">ybey_ecoli</a>  | <a href="#">phol_ecoli</a> |
| P23836 | PHOP_ECOLI  | * | P0A8G6 | P23836 | <a href="#">wrba_ecoli</a>  | <a href="#">phop_ecoli</a> |
| P00490 | PHSM_ECOLI  | * | P0ACF0 | P00490 | <a href="#">dbha_ecoli</a>  | <a href="#">phsm_ecoli</a> |
| P00490 | PHSM_ECOLI  | * | P0ACF4 | P00490 | <a href="#">dbhb_ecoli</a>  | <a href="#">phsm_ecoli</a> |
| P00490 | PHSM_ECOLI  | * | P0ACF4 | P00490 | <a href="#">dbhb_ecoli</a>  | <a href="#">phsm_ecoli</a> |
| P00490 | PHSM_ECOLI  | * | P00582 | P00490 | <a href="#">dpo1_ecoli</a>  | <a href="#">phsm_ecoli</a> |
| P00490 | PHSM_ECOLI  | * | P00582 | P00490 | <a href="#">dpo1_ecoli</a>  | <a href="#">phsm_ecoli</a> |
| P00490 | PHSM_ECOLI  | * | P0A6C1 | P00490 | <a href="#">end4_ecoli</a>  | <a href="#">phsm_ecoli</a> |
| P00490 | PHSM_ECOLI  | * | P09030 | P00490 | <a href="#">ex3_ecoli</a>   | <a href="#">phsm_ecoli</a> |
| P00490 | PHSM_ECOLI  | * | P0ACF8 | P00490 | <a href="#">hns_ecoli</a>   | <a href="#">phsm_ecoli</a> |
| P00490 | PHSM_ECOLI  | * | P68739 | P00490 | <a href="#">nfi_ecoli</a>   | <a href="#">phsm_ecoli</a> |
| P00490 | PHSM_ECOLI  | * | P0A7Y4 | P00490 | <a href="#">rnh_ecoli</a>   | <a href="#">phsm_ecoli</a> |
| P00490 | PHSM_ECOLI  | * | P0A8T7 | P00490 | <a href="#">rpoc_ecoli</a>  | <a href="#">phsm_ecoli</a> |
| P00490 | PHSM_ECOLI  | * | P28043 | P00490 | <a href="#">ssb2_ecolx</a>  | <a href="#">phsm_ecoli</a> |
| P00490 | PHSM_ECOLI  | * | P0A832 | P00490 | <a href="#">ssrp_ecoli</a>  | <a href="#">phsm_ecoli</a> |
| P00490 | PHSM_ECOLI  | * | P19705 | P00490 | <a href="#">t1se_ecolx</a>  | <a href="#">phsm_ecoli</a> |
| P00490 | PHSM_ECOLI  | * | P06612 | P00490 | <a href="#">top1_ecoli</a>  | <a href="#">phsm_ecoli</a> |
| P00490 | PHSM_ECOLI  | * | P03018 | P00490 | <a href="#">uvrd_ecoli</a>  | <a href="#">phsm_ecoli</a> |
| Q46806 | PHYDA_ECOLI |   | none   |        |                             |                            |
| P0AFK0 | PMBA_ECOLI  | * | P0ABD8 | P0AFK0 | <a href="#">bccp_ecoli</a>  | <a href="#">pmba_ecoli</a> |
| P37590 | PMRD_ECOLI  |   | none   |        |                             |                            |

|        |            |   |        |        |                             |                            |
|--------|------------|---|--------|--------|-----------------------------|----------------------------|
| P05055 | PNP_ECOLI  | * | P0A9Y6 | P05055 | <a href="#">cspc_ecoli</a>  | <a href="#">pnp_ecoli</a>  |
| P05055 | PNP_ECOLI  | * | P0A968 | P05055 | <a href="#">cspd_ecoli</a>  | <a href="#">pnp_ecoli</a>  |
| P05055 | PNP_ECOLI  | * | P0A972 | P05055 | <a href="#">cspe_ecoli</a>  | <a href="#">pnp_ecoli</a>  |
| P05055 | PNP_ECOLI  | * | P0A6P9 | P05055 | <a href="#">eno_ecoli</a>   | <a href="#">pnp_ecoli</a>  |
| P05055 | PNP_ECOLI  | * | P0A6P9 | P05055 | <a href="#">eno_ecoli</a>   | <a href="#">pnp_ecoli</a>  |
| P05055 | PNP_ECOLI  | * | P0A6X3 | P05055 | <a href="#">hfq_ecoli</a>   | <a href="#">pnp_ecoli</a>  |
| P05055 | PNP_ECOLI  | * | P0C054 | P05055 | <a href="#">ibpa_ecoli</a>  | <a href="#">pnp_ecoli</a>  |
| P05055 | PNP_ECOLI  | * | P0C054 | P05055 | <a href="#">ibpa_ecoli</a>  | <a href="#">pnp_ecoli</a>  |
| P05055 | PNP_ECOLI  | * | P0A9X4 | P05055 | <a href="#">mreb_ecoli</a>  | <a href="#">pnp_ecoli</a>  |
| P05055 | PNP_ECOLI  | * | P22188 | P05055 | <a href="#">mure_ecoli</a>  | <a href="#">pnp_ecoli</a>  |
| P05055 | PNP_ECOLI  | * | P0A799 | P05055 | <a href="#">pgk_ecoli</a>   | <a href="#">pnp_ecoli</a>  |
| P05055 | PNP_ECOLI  | * | P00490 | P05055 | <a href="#">phsm_ecoli</a>  | <a href="#">pnp_ecoli</a>  |
| P05055 | PNP_ECOLI  | * | P23830 | P05055 | <a href="#">pss_ecoli</a>   | <a href="#">pnp_ecoli</a>  |
| P05055 | PNP_ECOLI  | * | P0A8J8 | P05055 | <a href="#">rhlb_ecoli</a>  | <a href="#">pnp_ecoli</a>  |
| P05055 | PNP_ECOLI  | * | P0A8J8 | P05055 | <a href="#">rhlb_ecoli</a>  | <a href="#">pnp_ecoli</a>  |
| P05055 | PNP_ECOLI  | * | P36979 | P05055 | <a href="#">rlmn_ecoli</a>  | <a href="#">pnp_ecoli</a>  |
| P05055 | PNP_ECOLI  | * | P37765 | P05055 | <a href="#">rlub_ecoli</a>  | <a href="#">pnp_ecoli</a>  |
| P05055 | PNP_ECOLI  | * | P21513 | P05055 | <a href="#">rne_ecoli</a>   | <a href="#">pnp_ecoli</a>  |
| P05055 | PNP_ECOLI  | * | P21513 | P05055 | <a href="#">rne_ecoli</a>   | <a href="#">pnp_ecoli</a>  |
| P05055 | PNP_ECOLI  | * | P21513 | P05055 | <a href="#">rne_ecoli</a>   | <a href="#">pnp_ecoli</a>  |
| P05055 | PNP_ECOLI  | * | P21513 | P05055 | <a href="#">rne_ecoli</a>   | <a href="#">pnp_ecoli</a>  |
| P05055 | PNP_ECOLI  | * | P21513 | P05055 | <a href="#">rne_ecoli</a>   | <a href="#">pnp_ecoli</a>  |
| P05055 | PNP_ECOLI  | * | P21513 | P05055 | <a href="#">rne_ecoli</a>   | <a href="#">pnp_ecoli</a>  |
| P05055 | PNP_ECOLI  | * | P21513 | P05055 | <a href="#">rne_ecoli</a>   | <a href="#">pnp_ecoli</a>  |
| P05055 | PNP_ECOLI  | * | P21513 | P05055 | <a href="#">rne_ecoli</a>   | <a href="#">pnp_ecoli</a>  |
| P05055 | PNP_ECOLI  | * | P0A8E5 | P05055 | <a href="#">yacl_ecoli</a>  | <a href="#">pnp_ecoli</a>  |
| P05055 | PNP_ECOLI  | * | P0AAS7 | P05055 | <a href="#">ybcj_ecoli</a>  | <a href="#">pnp_ecoli</a>  |
| P05055 | PNP_ECOLI  | * | P0AAS7 | P05055 | <a href="#">ybcj_ecoli</a>  | <a href="#">pnp_ecoli</a>  |
| P07001 | PNTA_ECOLI | * | P0A8G0 | P07001 | <a href="#">uvrc_ecoli</a>  | <a href="#">pnta_ecoli</a> |
| P0AFL1 | POTI_ECOLI |   | none   |        |                             |                            |
| P23869 | PPIB_ECOLI | * | P0CI31 | P23869 | <a href="#">hcab_ecoli</a>  | <a href="#">ppib_ecoli</a> |
| P23869 | PPIB_ECOLI | * | P75713 | P23869 | <a href="#">ylba_ecoli</a>  | <a href="#">ppib_ecoli</a> |
| P0A7B1 | PPK_ECOLI  | * | P0AAF6 | P0A7B1 | <a href="#">artp_ecoli</a>  | <a href="#">ppk_ecoli</a>  |
| P0A7B1 | PPK_ECOLI  | * | P28249 | P0A7B1 | <a href="#">asma_ecoli</a>  | <a href="#">ppk_ecoli</a>  |
| P0A7B1 | PPK_ECOLI  | * | P0ABH9 | P0A7B1 | <a href="#">clpa_ecoli</a>  | <a href="#">ppk_ecoli</a>  |
| P0A7B1 | PPK_ECOLI  | * | P19930 | P0A7B1 | <a href="#">hyad_ecoli</a>  | <a href="#">ppk_ecoli</a>  |
| P0A7B1 | PPK_ECOLI  | * | P19931 | P0A7B1 | <a href="#">hyaecoli</a>    | <a href="#">ppk_ecoli</a>  |
| P0A7B1 | PPK_ECOLI  | * | P21599 | P0A7B1 | <a href="#">kpyk2_ecoli</a> | <a href="#">ppk_ecoli</a>  |
| P0A7B1 | PPK_ECOLI  | * | P05459 | P0A7B1 | <a href="#">pdxeb_ecoli</a> | <a href="#">ppk_ecoli</a>  |
| P0A7B1 | PPK_ECOLI  | * | P07013 | P0A7B1 | <a href="#">prib_ecoli</a>  | <a href="#">ppk_ecoli</a>  |
| P0A7B1 | PPK_ECOLI  | * | P0A7Y8 | P0A7B1 | <a href="#">rnpa_ecoli</a>  | <a href="#">ppk_ecoli</a>  |

|        |            |          |        |            |            |
|--------|------------|----------|--------|------------|------------|
| P0A7B1 | PPK_ECOLI  | * P00956 | P0A7B1 | syi_ecoli  | ppk_ecoli  |
| P0A7B1 | PPK_ECOLI  | * P00954 | P0A7B1 | syw_ecoli  | ppk_ecoli  |
| P0A7B1 | PPK_ECOLI  | * P30864 | P0A7B1 | yafo_ecoli | ppk_ecoli  |
| P0A7B1 | PPK_ECOLI  | * P77564 | P0A7B1 | ydhw_ecoli | ppk_ecoli  |
| P0A7B1 | PPK_ECOLI  | * P0A8D9 | P0A7B1 | yfbv_ecoli | ppk_ecoli  |
| P0A7B1 | PPK_ECOLI  | * P77434 | P0A7B1 | yfdz_ecoli | ppk_ecoli  |
| P0A7B1 | PPK_ECOLI  | * P52126 | P0A7B1 | yfjk_ecoli | ppk_ecoli  |
| P23538 | PPSA_ECOLI | * P10441 | P23538 | lpxb_ecoli | ppsa_ecoli |
| P23538 | PPSA_ECOLI | * P77181 | P23538 | paay_ecoli | ppsa_ecoli |
| P23538 | PPSA_ECOLI | * P0A850 | P23538 | tig_ecoli  | ppsa_ecoli |
| P23538 | PPSA_ECOLI | * P39177 | P23538 | uspg_ecoli | ppsa_ecoli |
| P23538 | PPSA_ECOLI | * P71237 | P23538 | wcac_ecoli | ppsa_ecoli |
| P23862 | PRIC_ECOLI | * P21170 | P23862 | spea_ecoli | pric_ecoli |
| P23862 | PRIC_ECOLI | * P39408 | P23862 | yjjv_ecoli | pric_ecoli |
| P45577 | PROQ_ECOLI | none     |        |            |            |
| P77243 | PRPD_ECOLI | * P0A9Y6 | P77243 | cspc_ecoli | prpd_ecoli |
| P77243 | PRPD_ECOLI | * P16095 | P77243 | sdhl_ecoli | prpd_ecoli |
| P37344 | PSPF_ECOLI | * P76204 | P37344 | ydiv_ecoli | pspf_ecoli |
| P23830 | PSS_ECOLI  | * P21645 | P23830 | lpxd_ecoli | pss_ecoli  |
| P23830 | PSS_ECOLI  | * P0AFG0 | P23830 | nusg_ecoli | pss_ecoli  |
| P23830 | PSS_ECOLI  | * P0A9K3 | P23830 | phol_ecoli | pss_ecoli  |
| P23830 | PSS_ECOLI  | * P37765 | P23830 | rlub_ecoli | pss_ecoli  |
| P23830 | PSS_ECOLI  | * P0AA39 | P23830 | rluc_ecoli | pss_ecoli  |
| P23830 | PSS_ECOLI  | * P0AA39 | P23830 | rluc_ecoli | pss_ecoli  |
| P23830 | PSS_ECOLI  | * P0A7Y8 | P23830 | rnpa_ecoli | pss_ecoli  |
| P23830 | PSS_ECOLI  | * P0A7Y8 | P23830 | rnpa_ecoli | pss_ecoli  |
| P23830 | PSS_ECOLI  | * P21499 | P23830 | rnrr_ecoli | pss_ecoli  |
| P23830 | PSS_ECOLI  | * P0A7Z4 | P23830 | rpoa_ecoli | pss_ecoli  |
| P23830 | PSS_ECOLI  | * P06612 | P23830 | top1_ecoli | pss_ecoli  |
| P23830 | PSS_ECOLI  | * P0A8I5 | P23830 | trmb_ecoli | pss_ecoli  |
| P23830 | PSS_ECOLI  | * P0AAS7 | P23830 | ybcj_ecoli | pss_ecoli  |
| P23830 | PSS_ECOLI  | * P75829 | P23830 | ybjx_ecoli | pss_ecoli  |
| P23830 | PSS_ECOLI  | * P0A8A2 | P23830 | yeen_ecoli | pss_ecoli  |
| P23830 | PSS_ECOLI  | * P0AGJ5 | P23830 | yfif_ecoli | pss_ecoli  |
| P08839 | PT1_ECOLI  | * P07330 | P08839 | cheb_ecoli | pt1_ecoli  |
| P08839 | PT1_ECOLI  | * P0A6W5 | P08839 | grea_ecoli | pt1_ecoli  |
| P08839 | PT1_ECOLI  | * P15038 | P08839 | held_ecoli | pt1_ecoli  |
| P08839 | PT1_ECOLI  | * P75959 | P08839 | nagk_ecoli | pt1_ecoli  |

|        |             |   |        |        |                             |                             |
|--------|-------------|---|--------|--------|-----------------------------|-----------------------------|
| P08839 | PT1_ECOLI   | * | P0AA04 | P08839 | <a href="#">pthp_ecoli</a>  | <a href="#">pt1_ecoli</a>   |
| P08839 | PT1_ECOLI   | * | P31129 | P08839 | <a href="#">ydeh_ecoli</a>  | <a href="#">pt1_ecoli</a>   |
| P0A9M8 | PTA_ECOLI   | * | P10443 | P0A9M8 | <a href="#">dpo3a_ecoli</a> | <a href="#">pta_ecoli</a>   |
| P0A9M8 | PTA_ECOLI   | * | P31574 | P0A9M8 | <a href="#">fixb_ecoli</a>  | <a href="#">pta_ecoli</a>   |
| P0A9M8 | PTA_ECOLI   | * | P0A9I5 | P0A9M8 | <a href="#">napd_ecoli</a>  | <a href="#">pta_ecoli</a>   |
| P0A9M8 | PTA_ECOLI   | * | P0A9I5 | P0A9M8 | <a href="#">napd_ecoli</a>  | <a href="#">pta_ecoli</a>   |
| P0A9M8 | PTA_ECOLI   | * | P37128 | P0A9M8 | <a href="#">nudk_ecoli</a>  | <a href="#">pta_ecoli</a>   |
| P0A9M8 | PTA_ECOLI   | * | P23869 | P0A9M8 | <a href="#">ppib_ecoli</a>  | <a href="#">pta_ecoli</a>   |
| P0A9M8 | PTA_ECOLI   | * | P0A7Z4 | P0A9M8 | <a href="#">rpoa_ecoli</a>  | <a href="#">pta_ecoli</a>   |
| P0A9M8 | PTA_ECOLI   | * | P14081 | P0A9M8 | <a href="#">selb_ecoli</a>  | <a href="#">pta_ecoli</a>   |
| P0A9M8 | PTA_ECOLI   | * | P41039 | P0A9M8 | <a href="#">ybii_ecoli</a>  | <a href="#">pta_ecoli</a>   |
| P0A9M8 | PTA_ECOLI   | * | P39332 | P0A9M8 | <a href="#">yjgh_ecoli</a>  | <a href="#">pta_ecoli</a>   |
| P0A9M8 | PTA_ECOLI   | * | P76584 | P0A9M8 | <a href="#">yphb_ecoli</a>  | <a href="#">pta_ecoli</a>   |
| P32670 | PTFX2_ECOLI |   | none   |        |                             |                             |
| P69783 | PTGA_ECOLI  | * | P04335 | P69783 | <a href="#">frsa_ecoli</a>  | <a href="#">ptga_ecoli</a>  |
| P69783 | PTGA_ECOLI  | * | P0AA25 | P69783 | <a href="#">thio_ecoli</a>  | <a href="#">ptga_ecoli</a>  |
| P69783 | PTGA_ECOLI  | * | P0AA25 | P69783 | <a href="#">thio_ecoli</a>  | <a href="#">ptga_ecoli</a>  |
| P05706 | PTHA_ECOLI  |   | none   |        |                             |                             |
| P0AA04 | PTHP_ECOLI  | * | P69783 | P0AA04 | <a href="#">ptga_ecoli</a>  | <a href="#">pthp_ecoli</a>  |
| P69828 | PTKA_ECOLI  | * | P0C054 | P69828 | <a href="#">ibpa_ecoli</a>  | <a href="#">ptka_ecoli</a>  |
| P69828 | PTKA_ECOLI  | * | P0A7E9 | P69828 | <a href="#">pyrh_ecoli</a>  | <a href="#">ptka_ecoli</a>  |
| P69828 | PTKA_ECOLI  | * | P0A850 | P69828 | <a href="#">tig_ecoli</a>   | <a href="#">ptka_ecoli</a>  |
| P37188 | PTKB_ECOLI  | * | P0C054 | P37188 | <a href="#">ibpa_ecoli</a>  | <a href="#">ptkb_ecoli</a>  |
| P37188 | PTKB_ECOLI  | * | P0A9X4 | P37188 | <a href="#">mreb_ecoli</a>  | <a href="#">ptkb_ecoli</a>  |
| P37188 | PTKB_ECOLI  | * | P0A7E9 | P37188 | <a href="#">pyrh_ecoli</a>  | <a href="#">ptkb_ecoli</a>  |
| P69797 | PTNAB_ECOLI | * | P0ACN7 | P69797 | <a href="#">cytr_ecoli</a>  | <a href="#">ptnab_ecoli</a> |
| P69797 | PTNAB_ECOLI | * | P24255 | P69797 | <a href="#">rp54_ecoli</a>  | <a href="#">ptnab_ecoli</a> |
| P69797 | PTNAB_ECOLI | * | P13445 | P69797 | <a href="#">rpos_ecoli</a>  | <a href="#">ptnab_ecoli</a> |
| P69797 | PTNAB_ECOLI | * | P0A858 | P69797 | <a href="#">tpis_ecoli</a>  | <a href="#">ptnab_ecoli</a> |
| P69797 | PTNAB_ECOLI | * | P77256 | P69797 | <a href="#">ydjg_ecoli</a>  | <a href="#">ptnab_ecoli</a> |
| P69795 | PTQB_ECOLI  | * | P52006 | P69795 | <a href="#">nudi_ecoli</a>  | <a href="#">ptqb_ecoli</a>  |
| P17334 | PTQC_ECOLI  | * | P0ABZ6 | P17334 | <a href="#">sura_ecoli</a>  | <a href="#">ptqc_ecoli</a>  |
| P69829 | PTSN_ECOLI  |   | none   |        |                             |                             |

|        |            |   |        |        |            |            |
|--------|------------|---|--------|--------|------------|------------|
| P0A7D7 | PUR7_ECOLI | * | P62707 | P0A7D7 | gpma_ecoli | pur7_ecoli |
| P0A7D7 | PUR7_ECOLI | * | P0AAN1 | P0A7D7 | hybe_ecoli | pur7_ecoli |
| P0A7D7 | PUR7_ECOLI | * | P0AEX5 | P0A7D7 | kppr_ecoli | pur7_ecoli |
| P0A7D7 | PUR7_ECOLI | * | P40874 | P0A7D7 | mtox_ecoli | pur7_ecoli |
| P0A7D7 | PUR7_ECOLI | * | P31663 | P0A7D7 | panc_ecoli | pur7_ecoli |
| P0A7D7 | PUR7_ECOLI | * | P0A7J0 | P0A7D7 | ribb_ecoli | pur7_ecoli |
| P0A7D7 | PUR7_ECOLI | * | P0AF50 | P0A7D7 | yjbr_ecoli | pur7_ecoli |
| P0A7D4 | PURA_ECOLI | * | P0AF67 | P0A7D4 | yjee_ecoli | pura_ecoli |
| P0ACP7 | PURR_ECOLI | * | P77671 | P0ACP7 | allb_ecoli | purr_ecoli |
| P0ACP7 | PURR_ECOLI | * | P0AED9 | P0ACP7 | dcm_ecoli  | purr_ecoli |
| P0ACP7 | PURR_ECOLI | * | P0ABU2 | P0ACP7 | engd_ecoli | purr_ecoli |
| P0ACP7 | PURR_ECOLI | * | P06960 | P0ACP7 | otc2_ecoli | purr_ecoli |
| P0ACP7 | PURR_ECOLI | * | P08839 | P0ACP7 | pt1_ecoli  | purr_ecoli |
| P0ACP7 | PURR_ECOLI | * | P0ACU2 | P0ACP7 | rutr_ecoli | purr_ecoli |
| P0ACP7 | PURR_ECOLI | * | P0A8A0 | P0ACP7 | yebc_ecoli | purr_ecoli |
| P09546 | PUTA_ECOLI | * | P63284 | P09546 | clpb_ecoli | puta_ecoli |
| P09546 | PUTA_ECOLI | * | P0A9Y6 | P09546 | cspc_ecoli | puta_ecoli |
| P09546 | PUTA_ECOLI | * | P13036 | P09546 | feca_ecoli | puta_ecoli |
| P09546 | PUTA_ECOLI | * | P23869 | P09546 | ppib_ecoli | puta_ecoli |
| P09546 | PUTA_ECOLI | * | P0A9M8 | P09546 | pta_ecoli  | puta_ecoli |
| P09546 | PUTA_ECOLI | * | P24173 | P09546 | rfac_ecoli | puta_ecoli |
| P09546 | PUTA_ECOLI | * | P0AA25 | P09546 | thio_ecoli | puta_ecoli |
| P09546 | PUTA_ECOLI | * | P0A850 | P09546 | tig_ecoli  | puta_ecoli |
| P09546 | PUTA_ECOLI | * | P13482 | P09546 | trea_ecoli | puta_ecoli |
| P09546 | PUTA_ECOLI | * | P39177 | P09546 | uspg_ecoli | puta_ecoli |
| P09546 | PUTA_ECOLI | * | P27836 | P09546 | wecg_ecoli | puta_ecoli |
| P09546 | PUTA_ECOLI | * | P21367 | P09546 | ycac_ecoli | puta_ecoli |
| P09546 | PUTA_ECOLI | * | P52119 | P09546 | yfjf_ecoli | puta_ecoli |
| P09546 | PUTA_ECOLI | * | P42624 | P09546 | yhak_ecoli | puta_ecoli |
| P08244 | PYRF_ECOLI | * | P0A7I7 | P08244 | riba_ecoli | pyrf_ecoli |
| P08244 | PYRF_ECOLI | * | P0A7I7 | P08244 | riba_ecoli | pyrf_ecoli |
| P08244 | PYRF_ECOLI | * | P77766 | P08244 | trph_ecoli | pyrf_ecoli |
| P08244 | PYRF_ECOLI | * | P76280 | P08244 | yobb_ecoli | pyrf_ecoli |
| P0A7E5 | PYRG_ECOLI | * | P28249 | P0A7E5 | asma_ecoli | pyrg_ecoli |
| P0A7E5 | PYRG_ECOLI | * | Q46802 | P0A7E5 | ygev_ecoli | pyrg_ecoli |
| P28304 | QOR1_ECOLI |   | none   |        |            |            |
| P77756 | QUEC_ECOLI |   | none   |        |            |            |



|        |            |   |        |        |            |            |
|--------|------------|---|--------|--------|------------|------------|
| P16551 | RAFA_ECOLX |   | none   |        |            |            |
| P16552 | RAFB_ECOLX |   | none   |        |            |            |
| P60240 | RAPA_ECOLI | * | P00936 | P60240 | cyaa_ecoli | rapa_ecoli |
| P60240 | RAPA_ECOLI | * | P0A749 | P60240 | mura_ecoli | rapa_ecoli |
| P60240 | RAPA_ECOLI | * | P0AFG0 | P60240 | nusg_ecoli | rapa_ecoli |
| P60240 | RAPA_ECOLI | * | P0AFG0 | P60240 | nusg_ecoli | rapa_ecoli |
| P60240 | RAPA_ECOLI | * | P07004 | P60240 | proa_ecoli | rapa_ecoli |
| P60240 | RAPA_ECOLI | * | P0A7Z4 | P60240 | rpoa_ecoli | rapa_ecoli |
| P60240 | RAPA_ECOLI | * | P0A7Z4 | P60240 | rpoa_ecoli | rapa_ecoli |
| P60240 | RAPA_ECOLI | * | P0A7Z4 | P60240 | rpoa_ecoli | rapa_ecoli |
| P60240 | RAPA_ECOLI | * | P0A8V2 | P60240 | rpob_ecoli | rapa_ecoli |
| P60240 | RAPA_ECOLI | * | P0A8T7 | P60240 | rpoc_ecoli | rapa_ecoli |
| P60240 | RAPA_ECOLI | * | P0A8T7 | P60240 | rpoc_ecoli | rapa_ecoli |
| P60240 | RAPA_ECOLI | * | P0A800 | P60240 | rpoz_ecoli | rapa_ecoli |
| P60240 | RAPA_ECOLI | * | P0A8E5 | P60240 | yacl_ecoli | rapa_ecoli |
| P60240 | RAPA_ECOLI | * | P0A8E5 | P60240 | yacl_ecoli | rapa_ecoli |
| P60240 | RAPA_ECOLI | * | P0AB14 | P60240 | yccj_ecoli | rapa_ecoli |
| P0A7G2 | RBFA_ECOLI | * | P0AF10 | P0A7G2 | mtlr_ecoli | rbfa_ecoli |
| P02925 | RBSB_ECOLI | * | P39265 | P02925 | alsb_ecoli | rbsb_ecoli |
| P02925 | RBSB_ECOLI | * | P00956 | P02925 | syi_ecoli  | rbsb_ecoli |
| P02925 | RBSB_ECOLI | * | P0AA25 | P02925 | thio_ecoli | rbsb_ecoli |
| P0A9J6 | RBSK_ECOLI | * | P36659 | P0A9J6 | cbpa_ecoli | rbsk_ecoli |
| P0A9J6 | RBSK_ECOLI | * | P0A717 | P0A9J6 | kprs_ecoli | rbsk_ecoli |
| P69407 | RCSB_ECOLI | * | P0A9Y6 | P69407 | cspc_ecoli | rcsb_ecoli |
| P69407 | RCSB_ECOLI | * | P37195 | P69407 | dctr_ecoli | rcsb_ecoli |
| P69407 | RCSB_ECOLI | * | P36979 | P69407 | rlmn_ecoli | rcsb_ecoli |
| P69407 | RCSB_ECOLI | * | P0AA25 | P69407 | thio_ecoli | rcsb_ecoli |
| P69407 | RCSB_ECOLI | * | P0AA25 | P69407 | thio_ecoli | rcsb_ecoli |
| P69407 | RCSB_ECOLI | * | P76576 | P69407 | yfgm_ecoli | rcsb_ecoli |
| P52061 | RDGB_ECOLI |   | none   |        |            |            |
| P36767 | RDGC_ECOLI | * | P0ACF4 | P36767 | dbhb_ecoli | rdgc_ecoli |
| P36767 | RDGC_ECOLI | * | P15042 | P36767 | dnlj_ecoli | rdgc_ecoli |
| P36767 | RDGC_ECOLI | * | P0A6P9 | P36767 | eno_ecoli  | rdgc_ecoli |
| P36767 | RDGC_ECOLI | * | P68739 | P36767 | nfi_ecoli  | rdgc_ecoli |
| P36767 | RDGC_ECOLI | * | P28304 | P36767 | qor1_ecoli | rdgc_ecoli |
| P0A7G6 | RECA_ECOLI | * | P0ABB4 | P0A7G6 | atpb_ecoli | reca_ecoli |

|        |            |   |        |        |             |            |
|--------|------------|---|--------|--------|-------------|------------|
| P0A7G6 | RECA_ECOLI | * | P0A964 | P0A7G6 | chew_ecoli  | reca_ecoli |
| P0A7G6 | RECA_ECOLI | * | P0A6G7 | P0A7G6 | clpp_ecoli  | reca_ecoli |
| P0A7G6 | RECA_ECOLI | * | P76250 | P0A7G6 | dmlr_ecoli  | reca_ecoli |
| P0A7G6 | RECA_ECOLI | * | P08622 | P0A7G6 | dnaj_ecoli  | reca_ecoli |
| P0A7G6 | RECA_ECOLI | * | P77488 | P0A7G6 | dxs_ecoli   | reca_ecoli |
| P0A7G6 | RECA_ECOLI | * | P77277 | P0A7G6 | eutj_ecoli  | reca_ecoli |
| P0A7G6 | RECA_ECOLI | * | P0A9A6 | P0A7G6 | fts_z_ecoli | reca_ecoli |
| P0A7G6 | RECA_ECOLI | * | P31120 | P0A7G6 | glmm_ecoli  | reca_ecoli |
| P0A7G6 | RECA_ECOLI | * | P0AES4 | P0A7G6 | gyra_ecoli  | reca_ecoli |
| P0A7G6 | RECA_ECOLI | * | P0A6H5 | P0A7G6 | hslu_ecoli  | reca_ecoli |
| P0A7G6 | RECA_ECOLI | * | P0A817 | P0A7G6 | metk_ecoli  | reca_ecoli |
| P0A7G6 | RECA_ECOLI | * | P0A9X4 | P0A7G6 | mreb_ecoli  | reca_ecoli |
| P0A7G6 | RECA_ECOLI | * | P09152 | P0A7G6 | narg_ecoli  | reca_ecoli |
| P0A7G6 | RECA_ECOLI | * | P05055 | P0A7G6 | pnp_ecoli   | reca_ecoli |
| P0A7G6 | RECA_ECOLI | * | P0A7E9 | P0A7G6 | pyrh_ecoli  | reca_ecoli |
| P0A7G6 | RECA_ECOLI | * | P36979 | P0A7G6 | rlmn_ecoli  | reca_ecoli |
| P0A7G6 | RECA_ECOLI | * | P0CG19 | P0A7G6 | rnph_ecoli  | reca_ecoli |
| P0A7G6 | RECA_ECOLI | * | P0AA25 | P0A7G6 | thio_ecoli  | reca_ecoli |
| P0A7G6 | RECA_ECOLI | * | P0AA25 | P0A7G6 | thio_ecoli  | reca_ecoli |
| P0A7G6 | RECA_ECOLI | * | P77721 | P0A7G6 | ydj_f_ecoli | reca_ecoli |
| P0A7G6 | RECA_ECOLI | * | P76241 | P0A7G6 | yeam_ecoli  | reca_ecoli |
|        |            |   |        |        |             |            |
| P0AG20 | RELA_ECOLI | * | P0AB89 | P0AG20 | pur8_ecoli  | rela_ecoli |
| P0AG20 | RELA_ECOLI | * | P77279 | P0AG20 | ybb_l_ecoli | rela_ecoli |
|        |            |   |        |        |             |            |
| P09980 | REP_ECOLI  |   | none   |        |             |            |
|        |            |   |        |        |             |            |
| P05833 | REPA_ECOLX |   | none   |        |             |            |
|        |            |   |        |        |             |            |
| P07012 | RF2_ECOLI  |   | none   |        |             |            |
|        |            |   |        |        |             |            |
| P0A7I4 | RF3_ECOLI  |   | none   |        |             |            |
|        |            |   |        |        |             |            |
| P27127 | RFAB_ECOLI |   | none   |        |             |            |
|        |            |   |        |        |             |            |
| P37692 | RFAF_ECOLI | * | P64476 | P37692 | ydih_ecoli  | rfaf_ecoli |
|        |            |   |        |        |             |            |
| P25740 | RFAG_ECOLI | * | P0ABW9 | P25740 | flgb_ecoli  | rfag_ecoli |
| P25740 | RFAG_ECOLI | * | P0ACL5 | P25740 | glcc_ecoli  | rfag_ecoli |
| P25740 | RFAG_ECOLI | * | P15032 | P25740 | rece_ecoli  | rfag_ecoli |
| P25740 | RFAG_ECOLI | * | P77280 | P25740 | ydj_j_ecoli | rfag_ecoli |
|        |            |   |        |        |             |            |
| P25741 | RFAP_ECOLI | * | P05194 | P25741 | arod_ecoli  | rfap_ecoli |
| P25741 | RFAP_ECOLI | * | P23882 | P25741 | fmt_ecoli   | rfap_ecoli |

|        |             |      |        |        |                        |
|--------|-------------|------|--------|--------|------------------------|
| P37755 | RFBK9_ECOLX | none |        |        |                        |
| P0A8J8 | RHLB_ECOLI  | *    | P0A9H9 | P0A8J8 | chez_ecoli rhlb_ecoli  |
| P0A8J8 | RHLB_ECOLI  | *    | P05055 | P0A8J8 | pnp_ecoli rhlb_ecoli   |
| P0A8J8 | RHLB_ECOLI  | *    | P05055 | P0A8J8 | pnp_ecoli rhlb_ecoli   |
| P0A8J8 | RHLB_ECOLI  | *    | P21513 | P0A8J8 | rne_ecoli rhlb_ecoli   |
| P0A8J8 | RHLB_ECOLI  | *    | P21513 | P0A8J8 | rne_ecoli rhlb_ecoli   |
| P0A8J8 | RHLB_ECOLI  | *    | P21513 | P0A8J8 | rne_ecoli rhlb_ecoli   |
| P0A8J8 | RHLB_ECOLI  | *    | P21513 | P0A8J8 | rne_ecoli rhlb_ecoli   |
| P0A8J8 | RHLB_ECOLI  | *    | P21513 | P0A8J8 | rne_ecoli rhlb_ecoli   |
| P0A8J8 | RHLB_ECOLI  | *    | P21513 | P0A8J8 | rne_ecoli rhlb_ecoli   |
| P0A8J8 | RHLB_ECOLI  | *    | P21513 | P0A8J8 | rne_ecoli rhlb_ecoli   |
| P0A8J8 | RHLB_ECOLI  | *    | P21513 | P0A8J8 | rne_ecoli rhlb_ecoli   |
| P0A8J8 | RHLB_ECOLI  | *    | P0AAS7 | P0A8J8 | ybcj_ecoli rhlb_ecoli  |
| P25888 | RHLE_ECOLI  | *    | P0A6G7 | P25888 | clpp_ecoli rhle_ecoli  |
| P25888 | RHLE_ECOLI  | *    | P0A9Y6 | P25888 | cspc_ecoli rhle_ecoli  |
| P25888 | RHLE_ECOLI  | *    | P0ACF4 | P25888 | dbhb_ecoli rhle_ecoli  |
| P25888 | RHLE_ECOLI  | *    | P0A9R4 | P25888 | fer_ecoli rhle_ecoli   |
| P25888 | RHLE_ECOLI  | *    | P25437 | P25888 | frma_ecoli rhle_ecoli  |
| P25888 | RHLE_ECOLI  | *    | P0A705 | P25888 | if2_ecoli rhle_ecoli   |
| P25888 | RHLE_ECOLI  | *    | P0A7A9 | P25888 | ipyrc_ecoli rhle_ecoli |
| P25888 | RHLE_ECOLI  | *    | P08400 | P25888 | phor_ecoli rhle_ecoli  |
| P25888 | RHLE_ECOLI  | *    | P09377 | P25888 | rhas_ecoli rhle_ecoli  |
| P25888 | RHLE_ECOLI  | *    | P0AA39 | P25888 | rluc_ecoli rhle_ecoli  |
| P25888 | RHLE_ECOLI  | *    | P00448 | P25888 | sodm_ecoli rhle_ecoli  |
| P25888 | RHLE_ECOLI  | *    | P0AGE0 | P25888 | ssb_ecoli rhle_ecoli   |
| P0AG30 | RHO_ECOLI   | *    | P27550 | P0AG30 | acsa_ecoli rho_ecoli   |
| P0AG30 | RHO_ECOLI   | *    | P0ABB4 | P0AG30 | atpb_ecoli rho_ecoli   |
| P0AG30 | RHO_ECOLI   | *    | P36659 | P0AG30 | cbpa_ecoli rho_ecoli   |
| P0AG30 | RHO_ECOLI   | *    | P0ABH9 | P0AG30 | clpa_ecoli rho_ecoli   |
| P0AG30 | RHO_ECOLI   | *    | P0ABH9 | P0AG30 | clpa_ecoli rho_ecoli   |
| P0AG30 | RHO_ECOLI   | *    | P0A6G7 | P0AG30 | clpp_ecoli rho_ecoli   |
| P0AG30 | RHO_ECOLI   | *    | P0A6G7 | P0AG30 | clpp_ecoli rho_ecoli   |
| P0AG30 | RHO_ECOLI   | *    | P0A6H1 | P0AG30 | clpx_ecoli rho_ecoli   |
| P0AG30 | RHO_ECOLI   | *    | P0A9Y6 | P0AG30 | cspc_ecoli rho_ecoli   |
| P0AG30 | RHO_ECOLI   | *    | P0A9Y6 | P0AG30 | cspc_ecoli rho_ecoli   |
| P0AG30 | RHO_ECOLI   | *    | P0A968 | P0AG30 | cspd_ecoli rho_ecoli   |
| P0AG30 | RHO_ECOLI   | *    | P0A972 | P0AG30 | cspe_ecoli rho_ecoli   |
| P0AG30 | RHO_ECOLI   | *    | P08622 | P0AG30 | dnaj_ecoli rho_ecoli   |
| P0AG30 | RHO_ECOLI   | *    | P77488 | P0AG30 | dxs_ecoli rho_ecoli    |
| P0AG30 | RHO_ECOLI   | *    | P0AEK4 | P0AG30 | fabi_ecoli rho_ecoli   |
| P0AG30 | RHO_ECOLI   | *    | P77609 | P0AG30 | flxa_ecoli rho_ecoli   |
| P0AG30 | RHO_ECOLI   | *    | P0AEN1 | P0AG30 | fre_ecoli rho_ecoli    |

|        |           |          |        |            |           |
|--------|-----------|----------|--------|------------|-----------|
| P0AG30 | RHO_ECOLI | * P0ABH0 | P0AG30 | ftsa_ecoli | rho_ecoli |
| P0AG30 | RHO_ECOLI | * P0A6S7 | P0AG30 | gpda_ecoli | rho_ecoli |
| P0AG30 | RHO_ECOLI | * P0A6W5 | P0AG30 | grea_ecoli | rho_ecoli |
| P0AG30 | RHO_ECOLI | * P09372 | P0AG30 | grpe_ecoli | rho_ecoli |
| P0AG30 | RHO_ECOLI | * P0AES4 | P0AG30 | gyra_ecoli | rho_ecoli |
| P0AG30 | RHO_ECOLI | * P69931 | P0AG30 | hda_ecoli  | rho_ecoli |
| P0AG30 | RHO_ECOLI | * P0A6X3 | P0AG30 | hfq_ecoli  | rho_ecoli |
| P0AG30 | RHO_ECOLI | * P0A6X3 | P0AG30 | hfq_ecoli  | rho_ecoli |
| P0AG30 | RHO_ECOLI | * P0ACG8 | P0AG30 | hslr_ecoli | rho_ecoli |
| P0AG30 | RHO_ECOLI | * P62620 | P0AG30 | ispg_ecoli | rho_ecoli |
| P0AG30 | RHO_ECOLI | * P21645 | P0AG30 | lpxd_ecoli | rho_ecoli |
| P0AG30 | RHO_ECOLI | * P06993 | P0AG30 | malt_ecoli | rho_ecoli |
| P0AG30 | RHO_ECOLI | * P0A9X4 | P0AG30 | mreb_ecoli | rho_ecoli |
| P0AG30 | RHO_ECOLI | * P31062 | P0AG30 | nohb_ecoli | rho_ecoli |
| P0AG30 | RHO_ECOLI | * P0AFG0 | P0AG30 | nusg_ecoli | rho_ecoli |
| P0AG30 | RHO_ECOLI | * P0AFG0 | P0AG30 | nusg_ecoli | rho_ecoli |
| P0AG30 | RHO_ECOLI | * P0AFG0 | P0AG30 | nusg_ecoli | rho_ecoli |
| P0AG30 | RHO_ECOLI | * P31678 | P0AG30 | otsb_ecoli | rho_ecoli |
| P0AG30 | RHO_ECOLI | * P05459 | P0AG30 | pdxb_ecoli | rho_ecoli |
| P0AG30 | RHO_ECOLI | * P0A7A7 | P0AG30 | plsb_ecoli | rho_ecoli |
| P0AG30 | RHO_ECOLI | * P0ABS5 | P0AG30 | prim_ecoli | rho_ecoli |
| P0AG30 | RHO_ECOLI | * P42184 | P0AG30 | prsa_ecolx | rho_ecoli |
| P0AG30 | RHO_ECOLI | * P0A7E9 | P0AG30 | pyrh_ecoli | rho_ecoli |
| P0AG30 | RHO_ECOLI | * P0C0K3 | P0AG30 | rdoa_ecoli | rho_ecoli |
| P0AG30 | RHO_ECOLI | * P60723 | P0AG30 | rl4_ecoli  | rho_ecoli |
| P0AG30 | RHO_ECOLI | * P0A7Y8 | P0AG30 | rnpa_ecoli | rho_ecoli |
| P0AG30 | RHO_ECOLI | * P0AFW8 | P0AG30 | rof_ecoli  | rho_ecoli |
| P0AG30 | RHO_ECOLI | * P0A7Z4 | P0AG30 | rpoa_ecoli | rho_ecoli |
| P0AG30 | RHO_ECOLI | * P0A8V2 | P0AG30 | rpob_ecoli | rho_ecoli |
| P0AG30 | RHO_ECOLI | * P00579 | P0AG30 | rpod_ecoli | rho_ecoli |
| P0AG30 | RHO_ECOLI | * P00579 | P0AG30 | rpod_ecoli | rho_ecoli |
| P0AG30 | RHO_ECOLI | * P0A812 | P0AG30 | ruvb_ecoli | rho_ecoli |
| P0AG30 | RHO_ECOLI | * P10408 | P0AG30 | seca_ecoli | rho_ecoli |
| P0AG30 | RHO_ECOLI | * P14081 | P0AG30 | selb_ecoli | rho_ecoli |
| P0AG30 | RHO_ECOLI | * P0AFZ3 | P0AG30 | sspb_ecoli | rho_ecoli |
| P0AG30 | RHO_ECOLI | * P0A850 | P0AG30 | tig_ecoli  | rho_ecoli |
| P0AG30 | RHO_ECOLI | * P0A890 | P0AG30 | tusa_ecoli | rho_ecoli |
| P0AG30 | RHO_ECOLI | * P25534 | P0AG30 | ubih_ecoli | rho_ecoli |
| P0AG30 | RHO_ECOLI | * P37388 | P0AG30 | xylg_ecoli | rho_ecoli |
| P0AG30 | RHO_ECOLI | * P0AB43 | P0AG30 | ycgl_ecoli | rho_ecoli |
| P0AG30 | RHO_ECOLI | * P08245 | P0AG30 | ycih_ecoli | rho_ecoli |
| P0AG30 | RHO_ECOLI | * P76104 | P0AG30 | ydcp_ecoli | rho_ecoli |
| P0AG30 | RHO_ECOLI | * P76464 | P0AG30 | yfas_ecoli | rho_ecoli |
| P0AG30 | RHO_ECOLI | * P33941 | P0AG30 | yoji_ecoli | rho_ecoli |

|        |            |          |        |             |            |
|--------|------------|----------|--------|-------------|------------|
| P22564 | RIHC_ECOLI | * P11880 | P22564 | murf_ecoli  | rihc_ecoli |
| P0A948 | RIMJ_ECOLI | * P31441 | P0A948 | adec_ecoli  | rimj_ecoli |
| P0A948 | RIMJ_ECOLI | * P77731 | P0A948 | alla_ecoli  | rimj_ecoli |
| P0A948 | RIMJ_ECOLI | * P17444 | P0A948 | beta_ecoli  | rimj_ecoli |
| P0A948 | RIMJ_ECOLI | * P17445 | P0A948 | betb_ecoli  | rimj_ecoli |
| P0A948 | RIMJ_ECOLI | * P0AC19 | P0A948 | folx_ecoli  | rimj_ecoli |
| P0A948 | RIMJ_ECOLI | * P0AFD6 | P0A948 | nuoi_ecoli  | rimj_ecoli |
| P0A948 | RIMJ_ECOLI | * P33596 | P0A948 | recx_ecoli  | rimj_ecoli |
| P0A948 | RIMJ_ECOLI | * P33022 | P0A948 | rihb_ecoli  | rimj_ecoli |
| P0A948 | RIMJ_ECOLI | * P0C018 | P0A948 | rl18_ecoli  | rimj_ecoli |
| P0A948 | RIMJ_ECOLI | * P06612 | P0A948 | top1_ecoli  | rimj_ecoli |
| P0A948 | RIMJ_ECOLI | * P77713 | P0A948 | yagh_ecoli  | rimj_ecoli |
| P0A948 | RIMJ_ECOLI | * P0AB61 | P0A948 | ycin_ecoli  | rimj_ecoli |
| P0A948 | RIMJ_ECOLI | * P0AD07 | P0A948 | yecf_ecoli  | rimj_ecoli |
| P0A948 | RIMJ_ECOLI | * P24178 | P0A948 | yffb_ecoli  | rimj_ecoli |
| P0A948 | RIMJ_ECOLI | * P0AFU4 | P0A948 | yfha_ecoli  | rimj_ecoli |
| P0A948 | RIMJ_ECOLI | * P76280 | P0A948 | yobb_ecoli  | rimj_ecoli |
| P0A7X6 | RIMM_ECOLI | none     |        |             |            |
| P0AEI4 | RIMO_ECOLI | none     |        |             |            |
| P0A8A8 | RIMP_ECOLI | none     |        |             |            |
| P0AFU8 | RISA_ECOLI | none     |        |             |            |
| P0A7L0 | RL1_ECOLI  | * P33224 | P0A7L0 | aidb_ecoli  | rl1_ecoli  |
| P0A7L0 | RL1_ECOLI  | * P0ACN4 | P0A7L0 | allr_ecoli  | rl1_ecoli  |
| P0A7L0 | RL1_ECOLI  | * P0ABB0 | P0A7L0 | atpa_ecoli  | rl1_ecoli  |
| P0A7L0 | RL1_ECOLI  | * P36659 | P0A7L0 | cbpa_ecoli  | rl1_ecoli  |
| P0A7L0 | RL1_ECOLI  | * P0A6G7 | P0A7L0 | clpp_ecoli  | rl1_ecoli  |
| P0A7L0 | RL1_ECOLI  | * P0ABQ0 | P0A7L0 | coabc_ecoli | rl1_ecoli  |
| P0A7L0 | RL1_ECOLI  | * P0A9X9 | P0A7L0 | cspa_ecoli  | rl1_ecoli  |
| P0A7L0 | RL1_ECOLI  | * P0A9X9 | P0A7L0 | cspa_ecoli  | rl1_ecoli  |
| P0A7L0 | RL1_ECOLI  | * P36995 | P0A7L0 | cspb_ecoli  | rl1_ecoli  |
| P0A7L0 | RL1_ECOLI  | * P0A9Y6 | P0A7L0 | cspc_ecoli  | rl1_ecoli  |
| P0A7L0 | RL1_ECOLI  | * P0A9Y6 | P0A7L0 | cspc_ecoli  | rl1_ecoli  |
| P0A7L0 | RL1_ECOLI  | * P0A9Y6 | P0A7L0 | cspc_ecoli  | rl1_ecoli  |
| P0A7L0 | RL1_ECOLI  | * P0A968 | P0A7L0 | cspd_ecoli  | rl1_ecoli  |
| P0A7L0 | RL1_ECOLI  | * P0A972 | P0A7L0 | cspe_ecoli  | rl1_ecoli  |
| P0A7L0 | RL1_ECOLI  | * P0A972 | P0A7L0 | cspe_ecoli  | rl1_ecoli  |
| P0A7L0 | RL1_ECOLI  | * P0A972 | P0A7L0 | cspe_ecoli  | rl1_ecoli  |
| P0A7L0 | RL1_ECOLI  | * P0A978 | P0A7L0 | cspg_ecoli  | rl1_ecoli  |
| P0A7L0 | RL1_ECOLI  | * P0A978 | P0A7L0 | cspg_ecoli  | rl1_ecoli  |

|        |           |          |        |            |           |
|--------|-----------|----------|--------|------------|-----------|
| POA7L0 | RL1_ECOLI | * P0A986 | POA7L0 | cspi_ecoli | rl1_ecoli |
| POA7L0 | RL1_ECOLI | * P0ACF4 | POA7L0 | dbhb_ecoli | rl1_ecoli |
| POA7L0 | RL1_ECOLI | * P0AED9 | POA7L0 | dcm_ecoli  | rl1_ecoli |
| POA7L0 | RL1_ECOLI | * P37195 | POA7L0 | dctr_ecoli | rl1_ecoli |
| POA7L0 | RL1_ECOLI | * P76316 | POA7L0 | dcyd_ecoli | rl1_ecoli |
| POA7L0 | RL1_ECOLI | * P0A9P6 | POA7L0 | dead_ecoli | rl1_ecoli |
| POA7L0 | RL1_ECOLI | * P0A9P6 | POA7L0 | dead_ecoli | rl1_ecoli |
| POA7L0 | RL1_ECOLI | * P0AEE8 | POA7L0 | dma_ecoli  | rl1_ecoli |
| POA7L0 | RL1_ECOLI | * P0ACB0 | POA7L0 | dnab_ecoli | rl1_ecoli |
| POA7L0 | RL1_ECOLI | * P0ACB0 | POA7L0 | dnab_ecoli | rl1_ecoli |
| POA7L0 | RL1_ECOLI | * P08622 | POA7L0 | dnaj_ecoli | rl1_ecoli |
| POA7L0 | RL1_ECOLI | * P37313 | POA7L0 | dppf_ecoli | rl1_ecoli |
| POA7L0 | RL1_ECOLI | * P0A6Q3 | POA7L0 | faba_ecoli | rl1_ecoli |
| POA7L0 | RL1_ECOLI | * P0A6Q6 | POA7L0 | fabz_ecoli | rl1_ecoli |
| POA7L0 | RL1_ECOLI | * P23882 | POA7L0 | fmt_ecoli  | rl1_ecoli |
| POA7L0 | RL1_ECOLI | * P0ACC7 | POA7L0 | glmu_ecoli | rl1_ecoli |
| POA7L0 | RL1_ECOLI | * P0A9Z1 | POA7L0 | glnb_ecoli | rl1_ecoli |
| POA7L0 | RL1_ECOLI | * P23871 | POA7L0 | hemh_ecoli | rl1_ecoli |
| POA7L0 | RL1_ECOLI | * P0A6X3 | POA7L0 | hfq_ecoli  | rl1_ecoli |
| POA7L0 | RL1_ECOLI | * P28631 | POA7L0 | holb_ecoli | rl1_ecoli |
| POA7L0 | RL1_ECOLI | * P28631 | POA7L0 | holb_ecoli | rl1_ecoli |
| POA7L0 | RL1_ECOLI | * P0ABS8 | POA7L0 | hole_ecoli | rl1_ecoli |
| POA7L0 | RL1_ECOLI | * P0A6L9 | POA7L0 | hscb_ecoli | rl1_ecoli |
| POA7L0 | RL1_ECOLI | * P0ACG8 | POA7L0 | hslr_ecoli | rl1_ecoli |
| POA7L0 | RL1_ECOLI | * P16528 | POA7L0 | iclr_ecoli | rl1_ecoli |
| POA7L0 | RL1_ECOLI | * P0A6X7 | POA7L0 | ihfa_ecoli | rl1_ecoli |
| POA7L0 | RL1_ECOLI | * P0A6Y1 | POA7L0 | ihfb_ecoli | rl1_ecoli |
| POA7L0 | RL1_ECOLI | * P0A715 | POA7L0 | kdsa_ecoli | rl1_ecoli |
| POA7L0 | RL1_ECOLI | * P0AC75 | POA7L0 | kdta_ecoli | rl1_ecoli |
| POA7L0 | RL1_ECOLI | * P21645 | POA7L0 | lpxd_ecoli | rl1_ecoli |
| POA7L0 | RL1_ECOLI | * P77791 | POA7L0 | maa_ecoli  | rl1_ecoli |
| POA7L0 | RL1_ECOLI | * P0A738 | POA7L0 | moac_ecoli | rl1_ecoli |
| POA7L0 | RL1_ECOLI | * P0AFF6 | POA7L0 | nusa_ecoli | rl1_ecoli |
| POA7L0 | RL1_ECOLI | * P0AFI2 | POA7L0 | parc_ecoli | rl1_ecoli |
| POA7L0 | RL1_ECOLI | * P0A9K3 | POA7L0 | phol_ecoli | rl1_ecoli |
| POA7L0 | RL1_ECOLI | * P0A9K3 | POA7L0 | phol_ecoli | rl1_ecoli |
| POA7L0 | RL1_ECOLI | * P00490 | POA7L0 | phsm_ecoli | rl1_ecoli |
| POA7L0 | RL1_ECOLI | * P05055 | POA7L0 | pnp_ecoli  | rl1_ecoli |
| POA7L0 | RL1_ECOLI | * P07013 | POA7L0 | prib_ecoli | rl1_ecoli |
| POA7L0 | RL1_ECOLI | * P23862 | POA7L0 | pric_ecoli | rl1_ecoli |
| POA7L0 | RL1_ECOLI | * P0ABS5 | POA7L0 | prim_ecoli | rl1_ecoli |
| POA7L0 | RL1_ECOLI | * P23830 | POA7L0 | pss_ecoli  | rl1_ecoli |
| POA7L0 | RL1_ECOLI | * P0A7E9 | POA7L0 | pyrh_ecoli | rl1_ecoli |
| POA7L0 | RL1_ECOLI | * P24230 | POA7L0 | recg_ecoli | rl1_ecoli |
| POA7L0 | RL1_ECOLI | * P37692 | POA7L0 | rfaf_ecoli | rl1_ecoli |



|        |           |          |        |            |           |
|--------|-----------|----------|--------|------------|-----------|
| POA7L0 | RL1_ECOLI | * P0A8J8 | POA7L0 | rhlb_ecoli | rl1_ecoli |
| POA7L0 | RL1_ECOLI | * P25888 | POA7L0 | rhle_ecoli | rl1_ecoli |
| POA7L0 | RL1_ECOLI | * P0C0R7 | POA7L0 | rlme_ecoli | rl1_ecoli |
| POA7L0 | RL1_ECOLI | * P75864 | POA7L0 | rlml_ecoli | rl1_ecoli |
| POA7L0 | RL1_ECOLI | * P75864 | POA7L0 | rlml_ecoli | rl1_ecoli |
| POA7L0 | RL1_ECOLI | * P36979 | POA7L0 | rlmn_ecoli | rl1_ecoli |
| POA7L0 | RL1_ECOLI | * P36979 | POA7L0 | rlmn_ecoli | rl1_ecoli |
| POA7L0 | RL1_ECOLI | * P36979 | POA7L0 | rlmn_ecoli | rl1_ecoli |
| POA7L0 | RL1_ECOLI | * P37765 | POA7L0 | rlub_ecoli | rl1_ecoli |
| POA7L0 | RL1_ECOLI | * P37765 | POA7L0 | rlub_ecoli | rl1_ecoli |
| POA7L0 | RL1_ECOLI | * P0AA39 | POA7L0 | rluc_ecoli | rl1_ecoli |
| POA7L0 | RL1_ECOLI | * P0AA39 | POA7L0 | rluc_ecoli | rl1_ecoli |
| POA7L0 | RL1_ECOLI | * P0AA39 | POA7L0 | rluc_ecoli | rl1_ecoli |
| POA7L0 | RL1_ECOLI | * P32684 | POA7L0 | rluf_ecoli | rl1_ecoli |
| POA7L0 | RL1_ECOLI | * P21513 | POA7L0 | rne_ecoli  | rl1_ecoli |
| POA7L0 | RL1_ECOLI | * P21513 | POA7L0 | rne_ecoli  | rl1_ecoli |
| POA7L0 | RL1_ECOLI | * P21513 | POA7L0 | rne_ecoli  | rl1_ecoli |
| POA7L0 | RL1_ECOLI | * P21513 | POA7L0 | rne_ecoli  | rl1_ecoli |
| POA7L0 | RL1_ECOLI | * P21513 | POA7L0 | rne_ecoli  | rl1_ecoli |
| POA7L0 | RL1_ECOLI | * P21513 | POA7L0 | rne_ecoli  | rl1_ecoli |
| POA7L0 | RL1_ECOLI | * P0A7Y8 | POA7L0 | rnpa_ecoli | rl1_ecoli |
| POA7L0 | RL1_ECOLI | * P0A7Y8 | POA7L0 | rnpa_ecoli | rl1_ecoli |
| POA7L0 | RL1_ECOLI | * P21499 | POA7L0 | rnrc_ecoli | rl1_ecoli |
| POA7L0 | RL1_ECOLI | * P21499 | POA7L0 | rnrc_ecoli | rl1_ecoli |
| POA7L0 | RL1_ECOLI | * P0A7Z4 | POA7L0 | rpoa_ecoli | rl1_ecoli |
| POA7L0 | RL1_ECOLI | * P00579 | POA7L0 | rpod_ecoli | rl1_ecoli |
| POA7L0 | RL1_ECOLI | * P00579 | POA7L0 | rpod_ecoli | rl1_ecoli |
| POA7L0 | RL1_ECOLI | * P13445 | POA7L0 | rpos_ecoli | rl1_ecoli |
| POA7L0 | RL1_ECOLI | * P0A776 | POA7L0 | rppe_ecoli | rl1_ecoli |
| POA7L0 | RL1_ECOLI | * P0A776 | POA7L0 | rppe_ecoli | rl1_ecoli |
| POA7L0 | RL1_ECOLI | * P75817 | POA7L0 | rumb_ecoli | rl1_ecoli |
| POA7L0 | RL1_ECOLI | * P0ACU2 | POA7L0 | rutr_ecoli | rl1_ecoli |
| POA7L0 | RL1_ECOLI | * P14081 | POA7L0 | selb_ecoli | rl1_ecoli |
| POA7L0 | RL1_ECOLI | * P15082 | POA7L0 | srlr_ecoli | rl1_ecoli |
| POA7L0 | RL1_ECOLI | * P21507 | POA7L0 | srmb_ecoli | rl1_ecoli |
| POA7L0 | RL1_ECOLI | * P0A832 | POA7L0 | ssrp_ecoli | rl1_ecoli |
| POA7L0 | RL1_ECOLI | * P77499 | POA7L0 | sufc_ecoli | rl1_ecoli |
| POA7L0 | RL1_ECOLI | * P0A8M3 | POA7L0 | syt_ecoli  | rl1_ecoli |
| POA7L0 | RL1_ECOLI | * P0A8M3 | POA7L0 | syt_ecoli  | rl1_ecoli |
| POA7L0 | RL1_ECOLI | * P0A847 | POA7L0 | tgt_ecoli  | rl1_ecoli |
| POA7L0 | RL1_ECOLI | * P77718 | POA7L0 | thii_ecoli | rl1_ecoli |
| POA7L0 | RL1_ECOLI | * P0A850 | POA7L0 | tig_ecoli  | rl1_ecoli |
| POA7L0 | RL1_ECOLI | * P52097 | POA7L0 | tils_ecoli | rl1_ecoli |
| POA7L0 | RL1_ECOLI | * P0AGJ7 | POA7L0 | trml_ecoli | rl1_ecoli |
| POA7L0 | RL1_ECOLI | * P0A9W0 | POA7L0 | ular_ecoli | rl1_ecoli |

|        |            |          |        |             |            |
|--------|------------|----------|--------|-------------|------------|
| POA7L0 | RL1_ECOLI  | * P0A8G0 | POA7L0 | uvrc_ecoli  | rl1_ecoli  |
| POA7L0 | RL1_ECOLI  | * P0A8G0 | POA7L0 | uvrc_ecoli  | rl1_ecoli  |
| POA7L0 | RL1_ECOLI  | * P71242 | POA7L0 | wcak_ecoli  | rl1_ecoli  |
| POA7L0 | RL1_ECOLI  | * P40711 | POA7L0 | yaej_ecoli  | rl1_ecoli  |
| POA7L0 | RL1_ECOLI  | * P21514 | POA7L0 | yaha_ecoli  | rl1_ecoli  |
| POA7L0 | RL1_ECOLI  | * P0AAR3 | POA7L0 | ybak_ecoli  | rl1_ecoli  |
| POA7L0 | RL1_ECOLI  | * P0AFP2 | POA7L0 | ybaz_ecoli  | rl1_ecoli  |
| POA7L0 | RL1_ECOLI  | * P0AAS7 | POA7L0 | ybcj_ecoli  | rl1_ecoli  |
| POA7L0 | RL1_ECOLI  | * P0AAS7 | POA7L0 | ybcj_ecoli  | rl1_ecoli  |
| POA7L0 | RL1_ECOLI  | * P30176 | POA7L0 | ybia_ecoli  | rl1_ecoli  |
| POA7L0 | RL1_ECOLI  | * P75829 | POA7L0 | ybjx_ecoli  | rl1_ecoli  |
| POA7L0 | RL1_ECOLI  | * P75829 | POA7L0 | ybjx_ecoli  | rl1_ecoli  |
| POA7L0 | RL1_ECOLI  | * P0A8N0 | POA7L0 | ycbg_ecoli  | rl1_ecoli  |
| POA7L0 | RL1_ECOLI  | * P37052 | POA7L0 | ychj_ecoli  | rl1_ecoli  |
| POA7L0 | RL1_ECOLI  | * P08245 | POA7L0 | ycih_ecoli  | rl1_ecoli  |
| POA7L0 | RL1_ECOLI  | * P76104 | POA7L0 | ydcj_ecoli  | rl1_ecoli  |
| POA7L0 | RL1_ECOLI  | * P76104 | POA7L0 | ydcj_ecoli  | rl1_ecoli  |
| POA7L0 | RL1_ECOLI  | * P77552 | POA7L0 | ydhq_ecoli  | rl1_ecoli  |
| POA7L0 | RL1_ECOLI  | * P0ACX9 | POA7L0 | ydie_ecoli  | rl1_ecoli  |
| POA7L0 | RL1_ECOLI  | * P76241 | POA7L0 | yeam_ecoli  | rl1_ecoli  |
| POA7L0 | RL1_ECOLI  | * P76243 | POA7L0 | yao_ecoli   | rl1_ecoli  |
| POA7L0 | RL1_ECOLI  | * P0AGJ5 | POA7L0 | yfif_ecoli  | rl1_ecoli  |
| POA7L0 | RL1_ECOLI  | * P0AGJ5 | POA7L0 | yfif_ecoli  | rl1_ecoli  |
| POA7L0 | RL1_ECOLI  | * P77295 | POA7L0 | ygav_ecoli  | rl1_ecoli  |
| POA7L0 | RL1_ECOLI  | * P45472 | POA7L0 | yhbq_ecoli  | rl1_ecoli  |
| POA7L0 | RL1_ECOLI  | * P0ADK8 | POA7L0 | yibl_ecoli  | rl1_ecoli  |
| POA7L0 | RL1_ECOLI  | * P75992 | POA7L0 | ymga_ecoli  | rl1_ecoli  |
| POA7L0 | RL1_ECOLI  | * P76148 | POA7L0 | yneg_ecoli  | rl1_ecoli  |
| POA7J3 | RL10_ECOLI | * P0A6E1 | POA7J3 | arol_ecoli  | rl10_ecoli |
| POA7J3 | RL10_ECOLI | * P61517 | POA7J3 | can_ecoli   | rl10_ecoli |
| POA7J3 | RL10_ECOLI | * P0ABH9 | POA7J3 | clpa_ecoli  | rl10_ecoli |
| POA7J3 | RL10_ECOLI | * P0A6G7 | POA7J3 | clpp_ecoli  | rl10_ecoli |
| POA7J3 | RL10_ECOLI | * P27296 | POA7J3 | ding_ecoli  | rl10_ecoli |
| POA7J3 | RL10_ECOLI | * P08622 | POA7J3 | dnaj_ecoli  | rl10_ecoli |
| POA7J3 | RL10_ECOLI | * P0A6Y8 | POA7J3 | dnak_ecoli  | rl10_ecoli |
| POA7J3 | RL10_ECOLI | * P0AEK4 | POA7J3 | fab_i_ecoli | rl10_ecoli |
| POA7J3 | RL10_ECOLI | * P0A6Q6 | POA7J3 | fabz_ecoli  | rl10_ecoli |
| POA7J3 | RL10_ECOLI | * P31574 | POA7J3 | fixb_ecoli  | rl10_ecoli |
| POA7J3 | RL10_ECOLI | * P0A6W5 | POA7J3 | grea_ecoli  | rl10_ecoli |
| POA7J3 | RL10_ECOLI | * P09372 | POA7J3 | grpe_ecoli  | rl10_ecoli |
| POA7J3 | RL10_ECOLI | * P0AES6 | POA7J3 | gyrb_ecoli  | rl10_ecoli |
| POA7J3 | RL10_ECOLI | * P28631 | POA7J3 | holb_ecoli  | rl10_ecoli |
| POA7J3 | RL10_ECOLI | * P0A6Z1 | POA7J3 | hsca_ecoli  | rl10_ecoli |
| POA7J3 | RL10_ECOLI | * P0A6Z1 | POA7J3 | hsca_ecoli  | rl10_ecoli |

|        |            |          |        |             |            |
|--------|------------|----------|--------|-------------|------------|
| POA7J3 | RL10_ECOLI | * P0A6L9 | POA7J3 | hscb_ecoli  | rl10_ecoli |
| POA7J3 | RL10_ECOLI | * P77319 | POA7J3 | hsc_c_ecoli | rl10_ecoli |
| POA7J3 | RL10_ECOLI | * P77319 | POA7J3 | hsc_c_ecoli | rl10_ecoli |
| POA7J3 | RL10_ECOLI | * P0A6H5 | POA7J3 | hslu_ecoli  | rl10_ecoli |
| POA7J3 | RL10_ECOLI | * P0A7B8 | POA7J3 | hslv_ecoli  | rl10_ecoli |
| POA7J3 | RL10_ECOLI | * P0A7A9 | POA7J3 | ipyr_ecoli  | rl10_ecoli |
| POA7J3 | RL10_ECOLI | * P0A722 | POA7J3 | lpxa_ecoli  | rl10_ecoli |
| POA7J3 | RL10_ECOLI | * P10441 | POA7J3 | lpxb_ecoli  | rl10_ecoli |
| POA7J3 | RL10_ECOLI | * P27896 | POA7J3 | narq_ecoli  | rl10_ecoli |
| POA7J3 | RL10_ECOLI | * P63020 | POA7J3 | nfua_ecoli  | rl10_ecoli |
| POA7J3 | RL10_ECOLI | * P0A9K3 | POA7J3 | phol_ecoli  | rl10_ecoli |
| POA7J3 | RL10_ECOLI | * P31473 | POA7J3 | rava_ecoli  | rl10_ecoli |
| POA7J3 | RL10_ECOLI | * P0A7G6 | POA7J3 | reca_ecoli  | rl10_ecoli |
| POA7J3 | RL10_ECOLI | * P09377 | POA7J3 | rhas_ecoli  | rl10_ecoli |
| POA7J3 | RL10_ECOLI | * P0C0R7 | POA7J3 | rlme_ecoli  | rl10_ecoli |
| POA7J3 | RL10_ECOLI | * P0C0R7 | POA7J3 | rlme_ecoli  | rl10_ecoli |
| POA7J3 | RL10_ECOLI | * P37351 | POA7J3 | rpib_ecoli  | rl10_ecoli |
| POA7J3 | RL10_ECOLI | * P0A776 | POA7J3 | rpiph_ecoli | rl10_ecoli |
| POA7J3 | RL10_ECOLI | * P0AFZ3 | POA7J3 | sspb_ecoli  | rl10_ecoli |
| POA7J3 | RL10_ECOLI | * P37610 | POA7J3 | taud_ecoli  | rl10_ecoli |
| POA7J3 | RL10_ECOLI | * P0A850 | POA7J3 | tig_ecoli   | rl10_ecoli |
| POA7J3 | RL10_ECOLI | * P52097 | POA7J3 | tils_ecoli  | rl10_ecoli |
| POA7J3 | RL10_ECOLI | * P0A8I5 | POA7J3 | trmb_ecoli  | rl10_ecoli |
| POA7J3 | RL10_ECOLI | * P60340 | POA7J3 | trub_ecoli  | rl10_ecoli |
| POA7J3 | RL10_ECOLI | * P0AFP2 | POA7J3 | ybaz_ecoli  | rl10_ecoli |
| POA7J3 | RL10_ECOLI | * P77634 | POA7J3 | ybcm_ecoli  | rl10_ecoli |
| POA7J3 | RL10_ECOLI | * P75829 | POA7J3 | ybjx_ecoli  | rl10_ecoli |
| POA7J3 | RL10_ECOLI | * P0AD12 | POA7J3 | yeez_ecoli  | rl10_ecoli |
| POA7J3 | RL10_ECOLI | * P0AFU4 | POA7J3 | yfha_ecoli  | rl10_ecoli |
| POA7J3 | RL10_ECOLI | * P0A8H6 | POA7J3 | yihi_ecoli  | rl10_ecoli |
| POA7J3 | RL10_ECOLI | * P77247 | POA7J3 | ynic_ecoli  | rl10_ecoli |
| POA7J7 | RL11_ECOLI | * P0A6G7 | POA7J7 | clpp_ecoli  | rl11_ecoli |
| POA7J7 | RL11_ECOLI | * P0A9P6 | POA7J7 | dead_ecoli  | rl11_ecoli |
| POA7J7 | RL11_ECOLI | * P0ABH0 | POA7J7 | ftsa_ecoli  | rl11_ecoli |
| POA7J7 | RL11_ECOLI | * P0A9R7 | POA7J7 | ftse_ecoli  | rl11_ecoli |
| POA7J7 | RL11_ECOLI | * P31120 | POA7J7 | glmm_ecoli  | rl11_ecoli |
| POA7J7 | RL11_ECOLI | * P0A6L9 | POA7J7 | hscb_ecoli  | rl11_ecoli |
| POA7J7 | RL11_ECOLI | * P22939 | POA7J7 | ispa_ecoli  | rl11_ecoli |
| POA7J7 | RL11_ECOLI | * P04951 | POA7J7 | kdsb_ecoli  | rl11_ecoli |
| POA7J7 | RL11_ECOLI | * P21645 | POA7J7 | lpxd_ecoli  | rl11_ecoli |
| POA7J7 | RL11_ECOLI | * P0A749 | POA7J7 | mura_ecoli  | rl11_ecoli |
| POA7J7 | RL11_ECOLI | * P17443 | POA7J7 | murg_ecoli  | rl11_ecoli |
| POA7J7 | RL11_ECOLI | * P22634 | POA7J7 | muri_ecoli  | rl11_ecoli |
| POA7J7 | RL11_ECOLI | * P0A7A7 | POA7J7 | plsb_ecoli  | rl11_ecoli |

|        |            |          |        |            |            |
|--------|------------|----------|--------|------------|------------|
| P0A7J7 | RL11_ECOLI | * P0A9L5 | P0A7J7 | ppic_ecoli | rl11_ecoli |
| P0A7J7 | RL11_ECOLI | * P0A8T1 | P0A7J7 | prma_ecoli | rl11_ecoli |
| P0A7J7 | RL11_ECOLI | * P0A8T1 | P0A7J7 | prma_ecoli | rl11_ecoli |
| P0A7J7 | RL11_ECOLI | * P0A8T1 | P0A7J7 | prma_ecoli | rl11_ecoli |
| P0A7J7 | RL11_ECOLI | * P0A7D1 | P0A7J7 | pth_ecoli  | rl11_ecoli |
| P0A7J7 | RL11_ECOLI | * P0A7E9 | P0A7J7 | pyrh_ecoli | rl11_ecoli |
| P0A7J7 | RL11_ECOLI | * P0A8J8 | P0A7J7 | rh1b_ecoli | rl11_ecoli |
| P0A7J7 | RL11_ECOLI | * P45748 | P0A7J7 | rimn_ecoli | rl11_ecoli |
| P0A7J7 | RL11_ECOLI | * P21513 | P0A7J7 | rne_ecoli  | rl11_ecoli |
| P0A7J7 | RL11_ECOLI | * P21513 | P0A7J7 | rne_ecoli  | rl11_ecoli |
| P0A7J7 | RL11_ECOLI | * P0A7Y8 | P0A7J7 | rnpa_ecoli | rl11_ecoli |
| P0A7J7 | RL11_ECOLI | * P0A8V2 | P0A7J7 | rpob_ecoli | rl11_ecoli |
| P0A7J7 | RL11_ECOLI | * P10408 | P0A7J7 | seca_ecoli | rl11_ecoli |
| P0A7J7 | RL11_ECOLI | * P07813 | P0A7J7 | syl_ecoli  | rl11_ecoli |
| P0A7J7 | RL11_ECOLI | * P0AAS7 | P0A7J7 | ybcj_ecoli | rl11_ecoli |
| P0A7J7 | RL11_ECOLI | * P77552 | P0A7J7 | ydhq_ecoli | rl11_ecoli |
| P0A7J7 | RL11_ECOLI | * P0AGK4 | P0A7J7 | yhby_ecoli | rl11_ecoli |
|        |            |          |        |            |            |
| P0AA10 | RL13_ECOLI | * P33224 | P0AA10 | aidb_ecoli | rl13_ecoli |
| P0AA10 | RL13_ECOLI | * P0AE18 | P0AA10 | ampm_ecoli | rl13_ecoli |
| P0AA10 | RL13_ECOLI | * P0ABH9 | P0AA10 | clpa_ecoli | rl13_ecoli |
| P0AA10 | RL13_ECOLI | * P63284 | P0AA10 | clpb_ecoli | rl13_ecoli |
| P0AA10 | RL13_ECOLI | * P0A6G7 | P0AA10 | clpp_ecoli | rl13_ecoli |
| P0AA10 | RL13_ECOLI | * P0A9Y6 | P0AA10 | cspc_ecoli | rl13_ecoli |
| P0AA10 | RL13_ECOLI | * P0A9Y6 | P0AA10 | cspc_ecoli | rl13_ecoli |
| P0AA10 | RL13_ECOLI | * P0A968 | P0AA10 | cspd_ecoli | rl13_ecoli |
| P0AA10 | RL13_ECOLI | * P0A978 | P0AA10 | cspg_ecoli | rl13_ecoli |
| P0AA10 | RL13_ECOLI | * P0AED9 | P0AA10 | dcm_ecoli  | rl13_ecoli |
| P0AA10 | RL13_ECOLI | * P0A9P6 | P0AA10 | dead_ecoli | rl13_ecoli |
| P0AA10 | RL13_ECOLI | * P0A9P6 | P0AA10 | dead_ecoli | rl13_ecoli |
| P0AA10 | RL13_ECOLI | * P33371 | P0AA10 | dusc_ecoli | rl13_ecoli |
| P0AA10 | RL13_ECOLI | * P0ABQ4 | P0AA10 | dyr_ecoli  | rl13_ecoli |
| P0AA10 | RL13_ECOLI | * P0A6Q6 | P0AA10 | fabz_ecoli | rl13_ecoli |
| P0AA10 | RL13_ECOLI | * P0ADH5 | P0AA10 | fimb_ecoli | rl13_ecoli |
| P0AA10 | RL13_ECOLI | * P0A6R3 | P0AA10 | fis_ecoli  | rl13_ecoli |
| P0AA10 | RL13_ECOLI | * P0AEN8 | P0AA10 | fucm_ecoli | rl13_ecoli |
| P0AA10 | RL13_ECOLI | * P31120 | P0AA10 | glmm_ecoli | rl13_ecoli |
| P0AA10 | RL13_ECOLI | * P0A6W5 | P0AA10 | grea_ecoli | rl13_ecoli |
| P0AA10 | RL13_ECOLI | * P0A6X3 | P0AA10 | hfq_ecoli  | rl13_ecoli |
| P0AA10 | RL13_ECOLI | * P28632 | P0AA10 | hold_ecoli | rl13_ecoli |
| P0AA10 | RL13_ECOLI | * P0ACG8 | P0AA10 | hslr_ecoli | rl13_ecoli |
| P0AA10 | RL13_ECOLI | * P0A6H5 | P0AA10 | hslu_ecoli | rl13_ecoli |
| P0AA10 | RL13_ECOLI | * P16528 | P0AA10 | iclr_ecoli | rl13_ecoli |
| P0AA10 | RL13_ECOLI | * P0A6Y1 | P0AA10 | ihfb_ecoli | rl13_ecoli |
| P0AA10 | RL13_ECOLI | * P08142 | P0AA10 | ilvb_ecoli | rl13_ecoli |

|        |            |          |        |                            |                            |
|--------|------------|----------|--------|----------------------------|----------------------------|
| P0AA10 | RL13_ECOLI | * P0A7A9 | P0AA10 | <a href="#">ipyr_ecoli</a> | <a href="#">rl13_ecoli</a> |
| P0AA10 | RL13_ECOLI | * P22939 | P0AA10 | <a href="#">ispa_ecoli</a> | <a href="#">rl13_ecoli</a> |
| P0AA10 | RL13_ECOLI | * P0A715 | P0AA10 | <a href="#">kdsa_ecoli</a> | <a href="#">rl13_ecoli</a> |
| P0AA10 | RL13_ECOLI | * P0AC75 | P0AA10 | <a href="#">kdta_ecoli</a> | <a href="#">rl13_ecoli</a> |
| P0AA10 | RL13_ECOLI | * P60785 | P0AA10 | <a href="#">lepa_ecoli</a> | <a href="#">rl13_ecoli</a> |
| P0AA10 | RL13_ECOLI | * P61316 | P0AA10 | <a href="#">lola_ecoli</a> | <a href="#">rl13_ecoli</a> |
| P0AA10 | RL13_ECOLI | * P0A9M0 | P0AA10 | <a href="#">lon_ecoli</a>  | <a href="#">rl13_ecoli</a> |
| P0AA10 | RL13_ECOLI | * P0A9M0 | P0AA10 | <a href="#">lon_ecoli</a>  | <a href="#">rl13_ecoli</a> |
| P0AA10 | RL13_ECOLI | * P0A722 | P0AA10 | <a href="#">lpxa_ecoli</a> | <a href="#">rl13_ecoli</a> |
| P0AA10 | RL13_ECOLI | * P10441 | P0AA10 | <a href="#">lpxb_ecoli</a> | <a href="#">rl13_ecoli</a> |
| P0AA10 | RL13_ECOLI | * P21645 | P0AA10 | <a href="#">lpxd_ecoli</a> | <a href="#">rl13_ecoli</a> |
| P0AA10 | RL13_ECOLI | * P25522 | P0AA10 | <a href="#">mnme_ecoli</a> | <a href="#">rl13_ecoli</a> |
| P0AA10 | RL13_ECOLI | * P22523 | P0AA10 | <a href="#">mukb_ecoli</a> | <a href="#">rl13_ecoli</a> |
| P0AA10 | RL13_ECOLI | * P22523 | P0AA10 | <a href="#">mukb_ecoli</a> | <a href="#">rl13_ecoli</a> |
| P0AA10 | RL13_ECOLI | * P0A749 | P0AA10 | <a href="#">mura_ecoli</a> | <a href="#">rl13_ecoli</a> |
| P0AA10 | RL13_ECOLI | * P17443 | P0AA10 | <a href="#">murg_ecoli</a> | <a href="#">rl13_ecoli</a> |
| P0AA10 | RL13_ECOLI | * P0A780 | P0AA10 | <a href="#">nusb_ecoli</a> | <a href="#">rl13_ecoli</a> |
| P0AA10 | RL13_ECOLI | * P76086 | P0AA10 | <a href="#">paax_ecoli</a> | <a href="#">rl13_ecoli</a> |
| P0AA10 | RL13_ECOLI | * P0AFI2 | P0AA10 | <a href="#">parc_ecoli</a> | <a href="#">rl13_ecoli</a> |
| P0AA10 | RL13_ECOLI | * P0A9K3 | P0AA10 | <a href="#">phol_ecoli</a> | <a href="#">rl13_ecoli</a> |
| P0AA10 | RL13_ECOLI | * P0A9K3 | P0AA10 | <a href="#">phol_ecoli</a> | <a href="#">rl13_ecoli</a> |
| P0AA10 | RL13_ECOLI | * P00490 | P0AA10 | <a href="#">phsm_ecoli</a> | <a href="#">rl13_ecoli</a> |
| P0AA10 | RL13_ECOLI | * P0A7A7 | P0AA10 | <a href="#">plsb_ecoli</a> | <a href="#">rl13_ecoli</a> |
| P0AA10 | RL13_ECOLI | * P05055 | P0AA10 | <a href="#">pnp_ecoli</a>  | <a href="#">rl13_ecoli</a> |
| P0AA10 | RL13_ECOLI | * P05055 | P0AA10 | <a href="#">pnp_ecoli</a>  | <a href="#">rl13_ecoli</a> |
| P0AA10 | RL13_ECOLI | * P0A9L5 | P0AA10 | <a href="#">ppic_ecoli</a> | <a href="#">rl13_ecoli</a> |
| P0AA10 | RL13_ECOLI | * P0A7D1 | P0AA10 | <a href="#">pth_ecoli</a>  | <a href="#">rl13_ecoli</a> |
| P0AA10 | RL13_ECOLI | * P0A7E9 | P0AA10 | <a href="#">pyrh_ecoli</a> | <a href="#">rl13_ecoli</a> |
| P0AA10 | RL13_ECOLI | * P69405 | P0AA10 | <a href="#">rcsa_ecoli</a> | <a href="#">rl13_ecoli</a> |
| P0AA10 | RL13_ECOLI | * P69407 | P0AA10 | <a href="#">rcsb_ecoli</a> | <a href="#">rl13_ecoli</a> |
| P0AA10 | RL13_ECOLI | * P69407 | P0AA10 | <a href="#">rcsb_ecoli</a> | <a href="#">rl13_ecoli</a> |
| P0AA10 | RL13_ECOLI | * P0A8J8 | P0AA10 | <a href="#">rhlb_ecoli</a> | <a href="#">rl13_ecoli</a> |
| P0AA10 | RL13_ECOLI | * P61714 | P0AA10 | <a href="#">risb_ecoli</a> | <a href="#">rl13_ecoli</a> |
| P0AA10 | RL13_ECOLI | * P63177 | P0AA10 | <a href="#">rlmb_ecoli</a> | <a href="#">rl13_ecoli</a> |
| P0AA10 | RL13_ECOLI | * P36979 | P0AA10 | <a href="#">rlmn_ecoli</a> | <a href="#">rl13_ecoli</a> |
| P0AA10 | RL13_ECOLI | * P36979 | P0AA10 | <a href="#">rlmn_ecoli</a> | <a href="#">rl13_ecoli</a> |
| P0AA10 | RL13_ECOLI | * P37765 | P0AA10 | <a href="#">rlub_ecoli</a> | <a href="#">rl13_ecoli</a> |
| P0AA10 | RL13_ECOLI | * P37765 | P0AA10 | <a href="#">rlub_ecoli</a> | <a href="#">rl13_ecoli</a> |
| P0AA10 | RL13_ECOLI | * P0AA39 | P0AA10 | <a href="#">rluc_ecoli</a> | <a href="#">rl13_ecoli</a> |
| P0AA10 | RL13_ECOLI | * P0AA39 | P0AA10 | <a href="#">rluc_ecoli</a> | <a href="#">rl13_ecoli</a> |
| P0AA10 | RL13_ECOLI | * P21513 | P0AA10 | <a href="#">rne_ecoli</a>  | <a href="#">rl13_ecoli</a> |
| P0AA10 | RL13_ECOLI | * P0A7Y8 | P0AA10 | <a href="#">rnpa_ecoli</a> | <a href="#">rl13_ecoli</a> |
| P0AA10 | RL13_ECOLI | * P21499 | P0AA10 | <a href="#">rnr_ecoli</a>  | <a href="#">rl13_ecoli</a> |
| P0AA10 | RL13_ECOLI | * P21499 | P0AA10 | <a href="#">rnr_ecoli</a>  | <a href="#">rl13_ecoli</a> |
| P0AA10 | RL13_ECOLI | * P0A7Z4 | P0AA10 | <a href="#">rpoa_ecoli</a> | <a href="#">rl13_ecoli</a> |

|        |            |          |        |            |            |
|--------|------------|----------|--------|------------|------------|
| P0AA10 | RL13_ECOLI | * P0A7Z4 | P0AA10 | rpoa_ecoli | rl13_ecoli |
| P0AA10 | RL13_ECOLI | * P0A8T7 | P0AA10 | rpoc_ecoli | rl13_ecoli |
| P0AA10 | RL13_ECOLI | * P0A776 | P0AA10 | rpph_ecoli | rl13_ecoli |
| P0AA10 | RL13_ECOLI | * P0A776 | P0AA10 | rpph_ecoli | rl13_ecoli |
| P0AA10 | RL13_ECOLI | * P39286 | P0AA10 | rsga_ecoli | rl13_ecoli |
| P0AA10 | RL13_ECOLI | * P0A6U5 | P0AA10 | rsmg_ecoli | rl13_ecoli |
| P0AA10 | RL13_ECOLI | * P14081 | P0AA10 | selb_ecoli | rl13_ecoli |
| P0AA10 | RL13_ECOLI | * P0AEU7 | P0AA10 | skp_ecoli  | rl13_ecoli |
| P0AA10 | RL13_ECOLI | * P0AG24 | P0AA10 | spot_ecoli | rl13_ecoli |
| P0AA10 | RL13_ECOLI | * P15082 | P0AA10 | srlr_ecoli | rl13_ecoli |
| P0AA10 | RL13_ECOLI | * P0A832 | P0AA10 | ssrp_ecoli | rl13_ecoli |
| P0AA10 | RL13_ECOLI | * P00960 | P0AA10 | syga_ecoli | rl13_ecoli |
| P0AA10 | RL13_ECOLI | * P0A8M3 | P0AA10 | syt_ecoli  | rl13_ecoli |
| P0AA10 | RL13_ECOLI | * P00954 | P0AA10 | syw_ecoli  | rl13_ecoli |
| P0AA10 | RL13_ECOLI | * P0A847 | P0AA10 | tgt_ecoli  | rl13_ecoli |
| P0AA10 | RL13_ECOLI | * P0A850 | P0AA10 | tig_ecoli  | rl13_ecoli |
| P0AA10 | RL13_ECOLI | * P0A8I5 | P0AA10 | trmb_ecoli | rl13_ecoli |
| P0AA10 | RL13_ECOLI | * P0A9W0 | P0AA10 | ular_ecoli | rl13_ecoli |
| P0AA10 | RL13_ECOLI | * P0A8G0 | P0AA10 | uvrc_ecoli | rl13_ecoli |
| P0AA10 | RL13_ECOLI | * P03018 | P0AA10 | uvrd_ecoli | rl13_ecoli |
| P0AA10 | RL13_ECOLI | * P0A8E5 | P0AA10 | yacl_ecoli | rl13_ecoli |
| P0AA10 | RL13_ECOLI | * P0A8E5 | P0AA10 | yacl_ecoli | rl13_ecoli |
| P0AA10 | RL13_ECOLI | * P0AAS7 | P0AA10 | ybcj_ecoli | rl13_ecoli |
| P0AA10 | RL13_ECOLI | * P75767 | P0AA10 | ybhk_ecoli | rl13_ecoli |
| P0AA10 | RL13_ECOLI | * P75829 | P0AA10 | ybjx_ecoli | rl13_ecoli |
| P0AA10 | RL13_ECOLI | * P75829 | P0AA10 | ybjx_ecoli | rl13_ecoli |
| P0AA10 | RL13_ECOLI | * P76594 | P0AA10 | yfiq_ecoli | rl13_ecoli |
| P0AA10 | RL13_ECOLI | * P0AGK4 | P0AA10 | yhby_ecoli | rl13_ecoli |
| P0AA10 | RL13_ECOLI | * P0ADK8 | P0AA10 | yibl_ecoli | rl13_ecoli |
| P0AA10 | RL13_ECOLI | * P45465 | P0AA10 | yanr_ecoli | rl13_ecoli |
|        |            |          |        |            |            |
| P0ADY3 | RL14_ECOLI | * P0AE28 | P0ADY3 | arom_ecoli | rl14_ecoli |
| P0ADY3 | RL14_ECOLI | * P0A964 | P0ADY3 | chew_ecoli | rl14_ecoli |
| P0ADY3 | RL14_ECOLI | * P0A6P5 | P0ADY3 | der_ecoli  | rl14_ecoli |
| P0ADY3 | RL14_ECOLI | * P03004 | P0ADY3 | dnaa_ecoli | rl14_ecoli |
| P0ADY3 | RL14_ECOLI | * P0A6M4 | P0ADY3 | dtd_ecoli  | rl14_ecoli |
| P0ADY3 | RL14_ECOLI | * P33371 | P0ADY3 | dusc_ecoli | rl14_ecoli |
| P0ADY3 | RL14_ECOLI | * P0ADI4 | P0ADY3 | entb_ecoli | rl14_ecoli |
| P0ADY3 | RL14_ECOLI | * P13024 | P0ADY3 | fdhe_ecoli | rl14_ecoli |
| P0ADY3 | RL14_ECOLI | * P0AEM0 | P0ADY3 | fbx_ecoli  | rl14_ecoli |
| P0ADY3 | RL14_ECOLI | * P26608 | P0ADY3 | flis_ecoli | rl14_ecoli |
| P0ADY3 | RL14_ECOLI | * P0A9A6 | P0ADY3 | ftsz_ecoli | rl14_ecoli |
| P0ADY3 | RL14_ECOLI | * P15067 | P0ADY3 | glgx_ecoli | rl14_ecoli |
| P0ADY3 | RL14_ECOLI | * P09372 | P0ADY3 | grpe_ecoli | rl14_ecoli |
| P0ADY3 | RL14_ECOLI | * P0A6X3 | P0ADY3 | hfq_ecoli  | rl14_ecoli |



|        |            |          |        |                            |                            |
|--------|------------|----------|--------|----------------------------|----------------------------|
| P0ADY3 | RL14_ECOLI | * P0ACF8 | P0ADY3 | <a href="#">hns_ecoli</a>  | <a href="#">rl14_ecoli</a> |
| P0ADY3 | RL14_ECOLI | * P51020 | P0ADY3 | <a href="#">hoa_ecoli</a>  | <a href="#">rl14_ecoli</a> |
| P0ADY3 | RL14_ECOLI | * P0A6Z1 | P0ADY3 | <a href="#">hsca_ecoli</a> | <a href="#">rl14_ecoli</a> |
| P0ADY3 | RL14_ECOLI | * P0ACG8 | P0ADY3 | <a href="#">hslr_ecoli</a> | <a href="#">rl14_ecoli</a> |
| P0ADY3 | RL14_ECOLI | * P0A6X7 | P0ADY3 | <a href="#">ihfa_ecoli</a> | <a href="#">rl14_ecoli</a> |
| P0ADY3 | RL14_ECOLI | * P0A7A9 | P0ADY3 | <a href="#">ipyr_ecoli</a> | <a href="#">rl14_ecoli</a> |
| P0ADY3 | RL14_ECOLI | * P0A715 | P0ADY3 | <a href="#">kdsa_ecoli</a> | <a href="#">rl14_ecoli</a> |
| P0ADY3 | RL14_ECOLI | * P0A722 | P0ADY3 | <a href="#">lpxa_ecoli</a> | <a href="#">rl14_ecoli</a> |
| P0ADY3 | RL14_ECOLI | * P63020 | P0ADY3 | <a href="#">nfua_ecoli</a> | <a href="#">rl14_ecoli</a> |
| P0ADY3 | RL14_ECOLI | * P0AFC0 | P0ADY3 | <a href="#">nudb_ecoli</a> | <a href="#">rl14_ecoli</a> |
| P0ADY3 | RL14_ECOLI | * P23869 | P0ADY3 | <a href="#">ppib_ecoli</a> | <a href="#">rl14_ecoli</a> |
| P0ADY3 | RL14_ECOLI | * P0AA39 | P0ADY3 | <a href="#">rluc_ecoli</a> | <a href="#">rl14_ecoli</a> |
| P0ADY3 | RL14_ECOLI | * P0A7Y8 | P0ADY3 | <a href="#">rnpa_ecoli</a> | <a href="#">rl14_ecoli</a> |
| P0ADY3 | RL14_ECOLI | * P21499 | P0ADY3 | <a href="#">rnr_ecoli</a>  | <a href="#">rl14_ecoli</a> |
| P0ADY3 | RL14_ECOLI | * P0A776 | P0ADY3 | <a href="#">rpph_ecoli</a> | <a href="#">rl14_ecoli</a> |
| P0ADY3 | RL14_ECOLI | * P0A9K9 | P0ADY3 | <a href="#">slyd_ecoli</a> | <a href="#">rl14_ecoli</a> |
| P0ADY3 | RL14_ECOLI | * P09158 | P0ADY3 | <a href="#">spee_ecoli</a> | <a href="#">rl14_ecoli</a> |
| P0ADY3 | RL14_ECOLI | * P0A850 | P0ADY3 | <a href="#">tig_ecoli</a>  | <a href="#">rl14_ecoli</a> |
| P0ADY3 | RL14_ECOLI | * P0A850 | P0ADY3 | <a href="#">tig_ecoli</a>  | <a href="#">rl14_ecoli</a> |
| P0ADY3 | RL14_ECOLI | * P0A9W0 | P0ADY3 | <a href="#">ular_ecoli</a> | <a href="#">rl14_ecoli</a> |
| P0ADY3 | RL14_ECOLI | * P0A8G0 | P0ADY3 | <a href="#">uvrc_ecoli</a> | <a href="#">rl14_ecoli</a> |
| P0ADY3 | RL14_ECOLI | * P0AAB2 | P0ADY3 | <a href="#">wzb_ecoli</a>  | <a href="#">rl14_ecoli</a> |
| P0ADY3 | RL14_ECOLI | * P0A8E5 | P0ADY3 | <a href="#">yacl_ecoli</a> | <a href="#">rl14_ecoli</a> |
| P0ADY3 | RL14_ECOLI | * P0A8E5 | P0ADY3 | <a href="#">yacl_ecoli</a> | <a href="#">rl14_ecoli</a> |
| P0ADY3 | RL14_ECOLI | * P0AAT6 | P0ADY3 | <a href="#">ybeb_ecoli</a> | <a href="#">rl14_ecoli</a> |
| P0ADY3 | RL14_ECOLI | * P77552 | P0ADY3 | <a href="#">ydhq_ecoli</a> | <a href="#">rl14_ecoli</a> |
| P0ADY3 | RL14_ECOLI | * P64479 | P0ADY3 | <a href="#">ydiz_ecoli</a> | <a href="#">rl14_ecoli</a> |
| P0ADY3 | RL14_ECOLI | * P77721 | P0ADY3 | <a href="#">ydfj_ecoli</a> | <a href="#">rl14_ecoli</a> |
| P0ADY3 | RL14_ECOLI | * P76322 | P0ADY3 | <a href="#">yedm_ecoli</a> | <a href="#">rl14_ecoli</a> |
| P0ADY3 | RL14_ECOLI | * P77196 | P0ADY3 | <a href="#">yfcu_ecoli</a> | <a href="#">rl14_ecoli</a> |
| P0ADY3 | RL14_ECOLI | * P0AF67 | P0ADY3 | <a href="#">yjee_ecoli</a> | <a href="#">rl14_ecoli</a> |
| P0ADY3 | RL14_ECOLI | * P76280 | P0ADY3 | <a href="#">yobb_ecoli</a> | <a href="#">rl14_ecoli</a> |
|        |            |          |        |                            |                            |
| P02413 | RL15_ECOLI | * P0A6A8 | P02413 | <a href="#">acp_ecoli</a>  | <a href="#">rl15_ecoli</a> |
| P02413 | RL15_ECOLI | * P28629 | P02413 | <a href="#">adia_ecoli</a> | <a href="#">rl15_ecoli</a> |
| P02413 | RL15_ECOLI | * Q06065 | P02413 | <a href="#">atoc_ecoli</a> | <a href="#">rl15_ecoli</a> |
| P02413 | RL15_ECOLI | * P31469 | P02413 | <a href="#">cbrc_ecoli</a> | <a href="#">rl15_ecoli</a> |
| P02413 | RL15_ECOLI | * P0A9X9 | P02413 | <a href="#">cspa_ecoli</a> | <a href="#">rl15_ecoli</a> |
| P02413 | RL15_ECOLI | * P0A972 | P02413 | <a href="#">cspe_ecoli</a> | <a href="#">rl15_ecoli</a> |
| P02413 | RL15_ECOLI | * P11557 | P02413 | <a href="#">damx_ecoli</a> | <a href="#">rl15_ecoli</a> |
| P02413 | RL15_ECOLI | * P0ACF0 | P02413 | <a href="#">dbha_ecoli</a> | <a href="#">rl15_ecoli</a> |
| P02413 | RL15_ECOLI | * P27296 | P02413 | <a href="#">ding_ecoli</a> | <a href="#">rl15_ecoli</a> |
| P02413 | RL15_ECOLI | * P03004 | P02413 | <a href="#">dnaa_ecoli</a> | <a href="#">rl15_ecoli</a> |
| P02413 | RL15_ECOLI | * P0ACB0 | P02413 | <a href="#">dnab_ecoli</a> | <a href="#">rl15_ecoli</a> |
| P02413 | RL15_ECOLI | * P46068 | P02413 | <a href="#">dsdc_ecoli</a> | <a href="#">rl15_ecoli</a> |

|        |            |          |        |            |            |
|--------|------------|----------|--------|------------|------------|
| P02413 | RL15_ECOLI | * P76556 | P02413 | eutp_ecoli | rl15_ecoli |
| P02413 | RL15_ECOLI | * P0AEM0 | P02413 | fkbx_ecoli | rl15_ecoli |
| P02413 | RL15_ECOLI | * P0ACC7 | P02413 | glmu_ecoli | rl15_ecoli |
| P02413 | RL15_ECOLI | * P09372 | P02413 | grpe_ecoli | rl15_ecoli |
| P02413 | RL15_ECOLI | * P0A6X3 | P02413 | hfq_ecoli  | rl15_ecoli |
| P02413 | RL15_ECOLI | * P67910 | P02413 | hldd_ecoli | rl15_ecoli |
| P02413 | RL15_ECOLI | * P0A6Y1 | P02413 | ihfb_ecoli | rl15_ecoli |
| P02413 | RL15_ECOLI | * P0A722 | P02413 | lpxa_ecoli | rl15_ecoli |
| P02413 | RL15_ECOLI | * P21645 | P02413 | lpxd_ecoli | rl15_ecoli |
| P02413 | RL15_ECOLI | * P21645 | P02413 | lpxd_ecoli | rl15_ecoli |
| P02413 | RL15_ECOLI | * P0AFF6 | P02413 | nusa_ecoli | rl15_ecoli |
| P02413 | RL15_ECOLI | * P0AFF6 | P02413 | nusa_ecoli | rl15_ecoli |
| P02413 | RL15_ECOLI | * P42641 | P02413 | obg_ecoli  | rl15_ecoli |
| P02413 | RL15_ECOLI | * P76086 | P02413 | paax_ecoli | rl15_ecoli |
| P02413 | RL15_ECOLI | * P29745 | P02413 | pept_ecoli | rl15_ecoli |
| P02413 | RL15_ECOLI | * P0A9K3 | P02413 | phol_ecoli | rl15_ecoli |
| P02413 | RL15_ECOLI | * P0A7A7 | P02413 | plsb_ecoli | rl15_ecoli |
| P02413 | RL15_ECOLI | * P05055 | P02413 | pnp_ecoli  | rl15_ecoli |
| P02413 | RL15_ECOLI | * P0A8K1 | P02413 | psd_ecoli  | rl15_ecoli |
| P02413 | RL15_ECOLI | * P0A7H3 | P02413 | reco_ecoli | rl15_ecoli |
| P02413 | RL15_ECOLI | * P77215 | P02413 | rhmd_ecoli | rl15_ecoli |
| P02413 | RL15_ECOLI | * P36979 | P02413 | rlmn_ecoli | rl15_ecoli |
| P02413 | RL15_ECOLI | * P36979 | P02413 | rlmn_ecoli | rl15_ecoli |
| P02413 | RL15_ECOLI | * P0AA39 | P02413 | rluc_ecoli | rl15_ecoli |
| P02413 | RL15_ECOLI | * P0AA39 | P02413 | rluc_ecoli | rl15_ecoli |
| P02413 | RL15_ECOLI | * P21513 | P02413 | rne_ecoli  | rl15_ecoli |
| P02413 | RL15_ECOLI | * P21513 | P02413 | rne_ecoli  | rl15_ecoli |
| P02413 | RL15_ECOLI | * P0A7Y8 | P02413 | rnpa_ecoli | rl15_ecoli |
| P02413 | RL15_ECOLI | * P21499 | P02413 | rnrc_ecoli | rl15_ecoli |
| P02413 | RL15_ECOLI | * P21499 | P02413 | rnrc_ecoli | rl15_ecoli |
| P02413 | RL15_ECOLI | * P0A7Z4 | P02413 | rpoa_ecoli | rl15_ecoli |
| P02413 | RL15_ECOLI | * P0A7Z4 | P02413 | rpoa_ecoli | rl15_ecoli |
| P02413 | RL15_ECOLI | * P0A8T7 | P02413 | rpoc_ecoli | rl15_ecoli |
| P02413 | RL15_ECOLI | * P00579 | P02413 | rpod_ecoli | rl15_ecoli |
| P02413 | RL15_ECOLI | * P0A776 | P02413 | rppe_ecoli | rl15_ecoli |
| P02413 | RL15_ECOLI | * P0A776 | P02413 | rppe_ecoli | rl15_ecoli |
| P02413 | RL15_ECOLI | * P14081 | P02413 | selb_ecoli | rl15_ecoli |
| P02413 | RL15_ECOLI | * P0AEU7 | P02413 | skp_ecoli  | rl15_ecoli |
| P02413 | RL15_ECOLI | * P0A9K9 | P02413 | slyd_ecoli | rl15_ecoli |
| P02413 | RL15_ECOLI | * P0AG24 | P02413 | spot_ecoli | rl15_ecoli |
| P02413 | RL15_ECOLI | * P15082 | P02413 | srlr_ecoli | rl15_ecoli |
| P02413 | RL15_ECOLI | * P0A850 | P02413 | tig_ecoli  | rl15_ecoli |
| P02413 | RL15_ECOLI | * P52097 | P02413 | tils_ecoli | rl15_ecoli |
| P02413 | RL15_ECOLI | * P60340 | P02413 | trub_ecoli | rl15_ecoli |
| P02413 | RL15_ECOLI | * P37903 | P02413 | uspf_ecoli | rl15_ecoli |

|        |            |          |        |            |            |
|--------|------------|----------|--------|------------|------------|
| P02413 | RL15_ECOLI | * P0A8E5 | P02413 | yacl_ecoli | rl15_ecoli |
| P02413 | RL15_ECOLI | * P0A8E5 | P02413 | yacl_ecoli | rl15_ecoli |
| P02413 | RL15_ECOLI | * P75829 | P02413 | ybjx_ecoli | rl15_ecoli |
| P02413 | RL15_ECOLI | * P0ACX5 | P02413 | ydhz_ecoli | rl15_ecoli |
| P02413 | RL15_ECOLI | * P0AD05 | P02413 | yeca_ecoli | rl15_ecoli |
| P02413 | RL15_ECOLI | * P76396 | P02413 | yegl_ecoli | rl15_ecoli |
| P02413 | RL15_ECOLI | * P77775 | P02413 | yfch_ecoli | rl15_ecoli |
| P02413 | RL15_ECOLI | * P27238 | P02413 | yfed_ecoli | rl15_ecoli |
| P02413 | RL15_ECOLI | * P76594 | P02413 | yfiq_ecoli | rl15_ecoli |
| P02413 | RL15_ECOLI | * P0ADT5 | P02413 | ygic_ecoli | rl15_ecoli |
| P02413 | RL15_ECOLI | * P0AGK4 | P02413 | yhby_ecoli | rl15_ecoli |
| P02413 | RL15_ECOLI | * P64616 | P02413 | yhco_ecoli | rl15_ecoli |
| P02413 | RL15_ECOLI | * P0A8H6 | P02413 | yihi_ecoli | rl15_ecoli |
| P02413 | RL15_ECOLI | * P32680 | P02413 | yjag_ecoli | rl15_ecoli |
| P02413 | RL15_ECOLI | * P0A8W5 | P02413 | yqge_ecoli | rl15_ecoli |
|        |            |          |        |            |            |
| P0ADY7 | RL16_ECOLI | * P0A9P6 | P0ADY7 | dead_ecoli | rl16_ecoli |
| P0ADY7 | RL16_ECOLI | * P03004 | P0ADY7 | dnaa_ecoli | rl16_ecoli |
| P0ADY7 | RL16_ECOLI | * P0A9R7 | P0ADY7 | ftse_ecoli | rl16_ecoli |
| P0ADY7 | RL16_ECOLI | * P0A9C5 | P0ADY7 | glna_ecoli | rl16_ecoli |
| P0ADY7 | RL16_ECOLI | * P28630 | P0ADY7 | hola_ecoli | rl16_ecoli |
| P0ADY7 | RL16_ECOLI | * P0A6H5 | P0ADY7 | hslu_ecoli | rl16_ecoli |
| P0ADY7 | RL16_ECOLI | * P0A6Y1 | P0ADY7 | ihfb_ecoli | rl16_ecoli |
| P0ADY7 | RL16_ECOLI | * P60546 | P0ADY7 | kgua_ecoli | rl16_ecoli |
| P0ADY7 | RL16_ECOLI | * P21645 | P0ADY7 | lpxd_ecoli | rl16_ecoli |
| P0ADY7 | RL16_ECOLI | * P76346 | P0ADY7 | mtfa_ecoli | rl16_ecoli |
| P0ADY7 | RL16_ECOLI | * P0AFF6 | P0ADY7 | nusa_ecoli | rl16_ecoli |
| P0ADY7 | RL16_ECOLI | * P0A9K3 | P0ADY7 | phol_ecoli | rl16_ecoli |
| P0ADY7 | RL16_ECOLI | * P69405 | P0ADY7 | rca_ecoli  | rl16_ecoli |
| P0ADY7 | RL16_ECOLI | * P0AA39 | P0ADY7 | rluc_ecoli | rl16_ecoli |
| P0ADY7 | RL16_ECOLI | * P0A7Y8 | P0ADY7 | rnpa_ecoli | rl16_ecoli |
| P0ADY7 | RL16_ECOLI | * P21499 | P0ADY7 | rnrc_ecoli | rl16_ecoli |
| P0ADY7 | RL16_ECOLI | * P0A7Z4 | P0ADY7 | rpoa_ecoli | rl16_ecoli |
| P0ADY7 | RL16_ECOLI | * P0A8T7 | P0ADY7 | rpoc_ecoli | rl16_ecoli |
| P0ADY7 | RL16_ECOLI | * P0A776 | P0ADY7 | rppe_ecoli | rl16_ecoli |
| P0ADY7 | RL16_ECOLI | * P00960 | P0ADY7 | syga_ecoli | rl16_ecoli |
| P0ADY7 | RL16_ECOLI | * P0A850 | P0ADY7 | tig_ecoli  | rl16_ecoli |
| P0ADY7 | RL16_ECOLI | * P0A8E5 | P0ADY7 | yacl_ecoli | rl16_ecoli |
| P0ADY7 | RL16_ECOLI | * P0A898 | P0ADY7 | ybey_ecoli | rl16_ecoli |
| P0ADY7 | RL16_ECOLI | * P27431 | P0ADY7 | ybfd_ecoli | rl16_ecoli |
| P0ADY7 | RL16_ECOLI | * P0AD33 | P0ADY7 | yfcz_ecoli | rl16_ecoli |
| P0ADY7 | RL16_ECOLI | * P0AGJ5 | P0ADY7 | yfif_ecoli | rl16_ecoli |
| P0ADY7 | RL16_ECOLI | * P76594 | P0ADY7 | yfiq_ecoli | rl16_ecoli |
| P0ADY7 | RL16_ECOLI | * P0ADT5 | P0ADY7 | ygic_ecoli | rl16_ecoli |

|        |            |          |        |            |            |
|--------|------------|----------|--------|------------|------------|
| P0AG44 | RL17_ECOLI | * P05050 | P0AG44 | alkb_ecoli | rl17_ecoli |
| P0AG44 | RL17_ECOLI | * P31469 | P0AG44 | cbrc_ecoli | rl17_ecoli |
| P0AG44 | RL17_ECOLI | * P06961 | P0AG44 | cca_ecoli  | rl17_ecoli |
| P0AG44 | RL17_ECOLI | * P76213 | P0AG44 | cho_ecoli  | rl17_ecoli |
| P0AG44 | RL17_ECOLI | * P0ABH9 | P0AG44 | clpa_ecoli | rl17_ecoli |
| P0AG44 | RL17_ECOLI | * P0A9X9 | P0AG44 | cspa_ecoli | rl17_ecoli |
| P0AG44 | RL17_ECOLI | * P0A986 | P0AG44 | cspi_ecoli | rl17_ecoli |
| P0AG44 | RL17_ECOLI | * P0ACF4 | P0AG44 | dbhb_ecoli | rl17_ecoli |
| P0AG44 | RL17_ECOLI | * P0A9P6 | P0AG44 | dead_ecoli | rl17_ecoli |
| P0AG44 | RL17_ECOLI | * P0AEE8 | P0AG44 | dma_ecoli  | rl17_ecoli |
| P0AG44 | RL17_ECOLI | * P06616 | P0AG44 | era_ecoli  | rl17_ecoli |
| P0AG44 | RL17_ECOLI | * P13024 | P0AG44 | fdhe_ecoli | rl17_ecoli |
| P0AG44 | RL17_ECOLI | * P0ADH5 | P0AG44 | fimb_ecoli | rl17_ecoli |
| P0AG44 | RL17_ECOLI | * P0AEM0 | P0AG44 | fkbx_ecoli | rl17_ecoli |
| P0AG44 | RL17_ECOLI | * P23882 | P0AG44 | fmt_ecoli  | rl17_ecoli |
| P0AG44 | RL17_ECOLI | * P29131 | P0AG44 | ftsn_ecoli | rl17_ecoli |
| P0AG44 | RL17_ECOLI | * P0ACL5 | P0AG44 | glcc_ecoli | rl17_ecoli |
| P0AG44 | RL17_ECOLI | * P0ACC7 | P0AG44 | glmu_ecoli | rl17_ecoli |
| P0AG44 | RL17_ECOLI | * P0A9C5 | P0AG44 | glna_ecoli | rl17_ecoli |
| P0AG44 | RL17_ECOLI | * P30128 | P0AG44 | greb_ecoli | rl17_ecoli |
| P0AG44 | RL17_ECOLI | * P09372 | P0AG44 | grpe_ecoli | rl17_ecoli |
| P0AG44 | RL17_ECOLI | * P0A6Z1 | P0AG44 | hsca_ecoli | rl17_ecoli |
| P0AG44 | RL17_ECOLI | * P77319 | P0AG44 | hscg_ecoli | rl17_ecoli |
| P0AG44 | RL17_ECOLI | * P0A7B8 | P0AG44 | hslv_ecoli | rl17_ecoli |
| P0AG44 | RL17_ECOLI | * P0AEV9 | P0AG44 | hyci_ecoli | rl17_ecoli |
| P0AG44 | RL17_ECOLI | * P30147 | P0AG44 | hyi_ecoli  | rl17_ecoli |
| P0AG44 | RL17_ECOLI | * P24218 | P0AG44 | intd_ecoli | rl17_ecoli |
| P0AG44 | RL17_ECOLI | * P0C0L9 | P0AG44 | iscx_ecoli | rl17_ecoli |
| P0AG44 | RL17_ECOLI | * P0A722 | P0AG44 | lpxa_ecoli | rl17_ecoli |
| P0AG44 | RL17_ECOLI | * P43341 | P0AG44 | lpxh_ecoli | rl17_ecoli |
| P0AG44 | RL17_ECOLI | * P0A738 | P0AG44 | moac_ecoli | rl17_ecoli |
| P0AG44 | RL17_ECOLI | * P25738 | P0AG44 | msyb_ecoli | rl17_ecoli |
| P0AG44 | RL17_ECOLI | * P76346 | P0AG44 | mtfa_ecoli | rl17_ecoli |
| P0AG44 | RL17_ECOLI | * P0A9H1 | P0AG44 | mug_ecoli  | rl17_ecoli |
| P0AG44 | RL17_ECOLI | * P22523 | P0AG44 | mukb_ecoli | rl17_ecoli |
| P0AG44 | RL17_ECOLI | * P17443 | P0AG44 | murg_ecoli | rl17_ecoli |
| P0AG44 | RL17_ECOLI | * P06722 | P0AG44 | muth_ecoli | rl17_ecoli |
| P0AG44 | RL17_ECOLI | * P17802 | P0AG44 | muty_ecoli | rl17_ecoli |
| P0AG44 | RL17_ECOLI | * P27896 | P0AG44 | narq_ecoli | rl17_ecoli |
| P0AG44 | RL17_ECOLI | * P75960 | P0AG44 | npd_ecoli  | rl17_ecoli |
| P0AG44 | RL17_ECOLI | * P42641 | P0AG44 | obg_ecoli  | rl17_ecoli |
| P0AG44 | RL17_ECOLI | * P40191 | P0AG44 | pdxk_ecoli | rl17_ecoli |
| P0AG44 | RL17_ECOLI | * P00914 | P0AG44 | phr_ecoli  | rl17_ecoli |
| P0AG44 | RL17_ECOLI | * P37590 | P0AG44 | pmrd_ecoli | rl17_ecoli |
| P0AG44 | RL17_ECOLI | * P05055 | P0AG44 | pnp_ecoli  | rl17_ecoli |

|        |            |   |        |        |            |            |
|--------|------------|---|--------|--------|------------|------------|
| POAG44 | RL17_ECOLI | * | P17888 | POAG44 | pria_ecoli | rl17_ecoli |
| POAG44 | RL17_ECOLI | * | P23830 | POAG44 | pss_ecoli  | rl17_ecoli |
| POAG44 | RL17_ECOLI | * | P24230 | POAG44 | recg_ecoli | rl17_ecoli |
| POAG44 | RL17_ECOLI | * | P37692 | POAG44 | rfaf_ecoli | rl17_ecoli |
| POAG44 | RL17_ECOLI | * | P27241 | POAG44 | rfaz_ecoli | rl17_ecoli |
| POAG44 | RL17_ECOLI | * | P77215 | POAG44 | rhmd_ecoli | rl17_ecoli |
| POAG44 | RL17_ECOLI | * | P0AEI4 | POAG44 | rimo_ecoli | rl17_ecoli |
| POAG44 | RL17_ECOLI | * | P75864 | POAG44 | rlml_ecoli | rl17_ecoli |
| POAG44 | RL17_ECOLI | * | P0ADR6 | POAG44 | rlmm_ecoli | rl17_ecoli |
| POAG44 | RL17_ECOLI | * | P36979 | POAG44 | rlmn_ecoli | rl17_ecoli |
| POAG44 | RL17_ECOLI | * | P0AA39 | POAG44 | rluc_ecoli | rl17_ecoli |
| POAG44 | RL17_ECOLI | * | P0AA39 | POAG44 | rluc_ecoli | rl17_ecoli |
| POAG44 | RL17_ECOLI | * | P32684 | POAG44 | rluf_ecoli | rl17_ecoli |
| POAG44 | RL17_ECOLI | * | P0A9J0 | POAG44 | rng_ecoli  | rl17_ecoli |
| POAG44 | RL17_ECOLI | * | P0AFW4 | POAG44 | rnk_ecoli  | rl17_ecoli |
| POAG44 | RL17_ECOLI | * | P0A7Y8 | POAG44 | rnpa_ecoli | rl17_ecoli |
| POAG44 | RL17_ECOLI | * | P0A8T7 | POAG44 | rpoc_ecoli | rl17_ecoli |
| POAG44 | RL17_ECOLI | * | P0AGB6 | POAG44 | rpoe_ecoli | rl17_ecoli |
| POAG44 | RL17_ECOLI | * | P0A776 | POAG44 | rpoh_ecoli | rl17_ecoli |
| POAG44 | RL17_ECOLI | * | P0A776 | POAG44 | rpoh_ecoli | rl17_ecoli |
| POAG44 | RL17_ECOLI | * | P0A8R0 | POAG44 | rrea_ecoli | rl17_ecoli |
| POAG44 | RL17_ECOLI | * | P36929 | POAG44 | rsmb_ecoli | rl17_ecoli |
| POAG44 | RL17_ECOLI | * | P0AGL7 | POAG44 | rsme_ecoli | rl17_ecoli |
| POAG44 | RL17_ECOLI | * | P0ACU2 | POAG44 | rutr_ecoli | rl17_ecoli |
| POAG44 | RL17_ECOLI | * | P14081 | POAG44 | selb_ecoli | rl17_ecoli |
| POAG44 | RL17_ECOLI | * | P21170 | POAG44 | spea_ecoli | rl17_ecoli |
| POAG44 | RL17_ECOLI | * | P0AG24 | POAG44 | spot_ecoli | rl17_ecoli |
| POAG44 | RL17_ECOLI | * | P0AFV4 | POAG44 | spr_ecoli  | rl17_ecoli |
| POAG44 | RL17_ECOLI | * | P0A847 | POAG44 | tgt_ecoli  | rl17_ecoli |
| POAG44 | RL17_ECOLI | * | P0A850 | POAG44 | tig_ecoli  | rl17_ecoli |
| POAG44 | RL17_ECOLI | * | P52097 | POAG44 | tils_ecoli | rl17_ecoli |
| POAG44 | RL17_ECOLI | * | P0A858 | POAG44 | tpis_ecoli | rl17_ecoli |
| POAG44 | RL17_ECOLI | * | P60340 | POAG44 | trub_ecoli | rl17_ecoli |
| POAG44 | RL17_ECOLI | * | P0A8F0 | POAG44 | upp_ecoli  | rl17_ecoli |
| POAG44 | RL17_ECOLI | * | P71242 | POAG44 | wcak_ecoli | rl17_ecoli |
| POAG44 | RL17_ECOLI | * | P0AAB2 | POAG44 | wzb_ecoli  | rl17_ecoli |
| POAG44 | RL17_ECOLI | * | P0A8P8 | POAG44 | xerd_ecoli | rl17_ecoli |
| POAG44 | RL17_ECOLI | * | P0A8E5 | POAG44 | yacl_ecoli | rl17_ecoli |
| POAG44 | RL17_ECOLI | * | P75691 | POAG44 | yahk_ecoli | rl17_ecoli |
| POAG44 | RL17_ECOLI | * | P0AAS7 | POAG44 | ybcj_ecoli | rl17_ecoli |
| POAG44 | RL17_ECOLI | * | P77634 | POAG44 | ybcm_ecoli | rl17_ecoli |
| POAG44 | RL17_ECOLI | * | P0A898 | POAG44 | ybey_ecoli | rl17_ecoli |
| POAG44 | RL17_ECOLI | * | P75829 | POAG44 | ybjx_ecoli | rl17_ecoli |
| POAG44 | RL17_ECOLI | * | P75915 | POAG44 | ycdy_ecoli | rl17_ecoli |
| POAG44 | RL17_ECOLI | * | P0AB28 | POAG44 | yced_ecoli | rl17_ecoli |

|        |            |          |        |                             |                            |
|--------|------------|----------|--------|-----------------------------|----------------------------|
| P0AG44 | RL17_ECOLI | * P27431 | P0AG44 | <a href="#">ycfd_ecoli</a>  | <a href="#">rl17_ecoli</a> |
| P0AG44 | RL17_ECOLI | * P08245 | P0AG44 | <a href="#">ycih_ecoli</a>  | <a href="#">rl17_ecoli</a> |
| P0AG44 | RL17_ECOLI | * P0A8L7 | P0AG44 | <a href="#">yciu_ecoli</a>  | <a href="#">rl17_ecoli</a> |
| P0AG44 | RL17_ECOLI | * P0ACX9 | P0AG44 | <a href="#">ydie_ecoli</a>  | <a href="#">rl17_ecoli</a> |
| P0AG44 | RL17_ECOLI | * P0A8A0 | P0AG44 | <a href="#">yebc_ecoli</a>  | <a href="#">rl17_ecoli</a> |
| P0AG44 | RL17_ECOLI | * P0AD07 | P0AG44 | <a href="#">yecf_ecoli</a>  | <a href="#">rl17_ecoli</a> |
| P0AG44 | RL17_ECOLI | * P0A8A2 | P0AG44 | <a href="#">yeen_ecoli</a>  | <a href="#">rl17_ecoli</a> |
| P0AG44 | RL17_ECOLI | * P76418 | P0AG44 | <a href="#">yegu_ecoli</a>  | <a href="#">rl17_ecoli</a> |
| P0AG44 | RL17_ECOLI | * P27238 | P0AG44 | <a href="#">yfed_ecoli</a>  | <a href="#">rl17_ecoli</a> |
| P0AG44 | RL17_ECOLI | * P0AGJ5 | P0AG44 | <a href="#">yfif_ecoli</a>  | <a href="#">rl17_ecoli</a> |
| P0AG44 | RL17_ECOLI | * P76594 | P0AG44 | <a href="#">yfiq_ecoli</a>  | <a href="#">rl17_ecoli</a> |
| P0AG44 | RL17_ECOLI | * P0ADQ7 | P0AG44 | <a href="#">ygam_ecoli</a>  | <a href="#">rl17_ecoli</a> |
| P0AG44 | RL17_ECOLI | * P77295 | P0AG44 | <a href="#">ygav_ecoli</a>  | <a href="#">rl17_ecoli</a> |
| P0AG44 | RL17_ECOLI | * P76632 | P0AG44 | <a href="#">ygck_ecoli</a>  | <a href="#">rl17_ecoli</a> |
| P0AG44 | RL17_ECOLI | * Q46927 | P0AG44 | <a href="#">ygdI_ecoli</a>  | <a href="#">rl17_ecoli</a> |
| P0AG44 | RL17_ECOLI | * P0ADT5 | P0AG44 | <a href="#">ygic_ecoli</a>  | <a href="#">rl17_ecoli</a> |
| P0AG44 | RL17_ECOLI | * P63417 | P0AG44 | <a href="#">yhbs_ecoli</a>  | <a href="#">rl17_ecoli</a> |
| P0AG44 | RL17_ECOLI | * P0AGK4 | P0AG44 | <a href="#">yhby_ecoli</a>  | <a href="#">rl17_ecoli</a> |
| P0AG44 | RL17_ECOLI | * P37631 | P0AG44 | <a href="#">yhin_ecoli</a>  | <a href="#">rl17_ecoli</a> |
| P0AG44 | RL17_ECOLI | * P0A8H6 | P0AG44 | <a href="#">yihi_ecoli</a>  | <a href="#">rl17_ecoli</a> |
| P0AG44 | RL17_ECOLI | * P32680 | P0AG44 | <a href="#">yjag_ecoli</a>  | <a href="#">rl17_ecoli</a> |
| P0AG44 | RL17_ECOLI | * P39360 | P0AG44 | <a href="#">yjhi_ecoli</a>  | <a href="#">rl17_ecoli</a> |
| P0AG44 | RL17_ECOLI | * P75992 | P0AG44 | <a href="#">ymga_ecoli</a>  | <a href="#">rl17_ecoli</a> |
|        |            |          |        |                             |                            |
| POC018 | RL18_ECOLI | * P0ABD5 | POC018 | <a href="#">acca_ecoli</a>  | <a href="#">rl18_ecoli</a> |
| POC018 | RL18_ECOLI | * P0ACN4 | POC018 | <a href="#">allr_ecoli</a>  | <a href="#">rl18_ecoli</a> |
| POC018 | RL18_ECOLI | * P0ABH9 | POC018 | <a href="#">clpa_ecoli</a>  | <a href="#">rl18_ecoli</a> |
| POC018 | RL18_ECOLI | * P0A9X9 | POC018 | <a href="#">cspa_ecoli</a>  | <a href="#">rl18_ecoli</a> |
| POC018 | RL18_ECOLI | * P0A9Y6 | POC018 | <a href="#">cspc_ecoli</a>  | <a href="#">rl18_ecoli</a> |
| POC018 | RL18_ECOLI | * P0A9P6 | POC018 | <a href="#">dead_ecoli</a>  | <a href="#">rl18_ecoli</a> |
| POC018 | RL18_ECOLI | * P33371 | POC018 | <a href="#">dusc_ecoli</a>  | <a href="#">rl18_ecoli</a> |
| POC018 | RL18_ECOLI | * P0A9R7 | POC018 | <a href="#">ftse_ecoli</a>  | <a href="#">rl18_ecoli</a> |
| POC018 | RL18_ECOLI | * P77319 | POC018 | <a href="#">hscC_ecoli</a>  | <a href="#">rl18_ecoli</a> |
| POC018 | RL18_ECOLI | * P21645 | POC018 | <a href="#">lpxd_ecoli</a>  | <a href="#">rl18_ecoli</a> |
| POC018 | RL18_ECOLI | * P22523 | POC018 | <a href="#">mukB_ecoli</a>  | <a href="#">rl18_ecoli</a> |
| POC018 | RL18_ECOLI | * P0A7E9 | POC018 | <a href="#">pyrh_ecoli</a>  | <a href="#">rl18_ecoli</a> |
| POC018 | RL18_ECOLI | * P63177 | POC018 | <a href="#">rlmb_ecoli</a>  | <a href="#">rl18_ecoli</a> |
| POC018 | RL18_ECOLI | * P36979 | POC018 | <a href="#">rlmn_ecoli</a>  | <a href="#">rl18_ecoli</a> |
| POC018 | RL18_ECOLI | * P0AA39 | POC018 | <a href="#">rluc_ecoli</a>  | <a href="#">rl18_ecoli</a> |
| POC018 | RL18_ECOLI | * P0A7Y8 | POC018 | <a href="#">rnpa_ecoli</a>  | <a href="#">rl18_ecoli</a> |
| POC018 | RL18_ECOLI | * P0A776 | POC018 | <a href="#">rpPh_ecoli</a>  | <a href="#">rl18_ecoli</a> |
| POC018 | RL18_ECOLI | * P0A776 | POC018 | <a href="#">rpPh_ecoli</a>  | <a href="#">rl18_ecoli</a> |
| POC018 | RL18_ECOLI | * P0AG24 | POC018 | <a href="#">spot_ecoli</a>  | <a href="#">rl18_ecoli</a> |
| POC018 | RL18_ECOLI | * P15082 | POC018 | <a href="#">srI_r_ecoli</a> | <a href="#">rl18_ecoli</a> |
| POC018 | RL18_ECOLI | * P0AAS7 | POC018 | <a href="#">ybcJ_ecoli</a>  | <a href="#">rl18_ecoli</a> |



|        |            |          |        |            |            |
|--------|------------|----------|--------|------------|------------|
| POC018 | RL18_ECOLI | * P0AGJ5 | POC018 | yfif_ecoli | rl18_ecoli |
| POC018 | RL18_ECOLI | * Q46904 | POC018 | ygcn_ecoli | rl18_ecoli |
| POC018 | RL18_ECOLI | * P67624 | POC018 | yheu_ecoli | rl18_ecoli |
| POC018 | RL18_ECOLI | * P0ADK8 | POC018 | yibl_ecoli | rl18_ecoli |
| POA7K6 | RL19_ECOLI | * P33224 | POA7K6 | aidb_ecoli | rl19_ecoli |
| POA7K6 | RL19_ECOLI | * P0ACN4 | POA7K6 | allr_ecoli | rl19_ecoli |
| POA7K6 | RL19_ECOLI | * P0AE18 | POA7K6 | ampm_ecoli | rl19_ecoli |
| POA7K6 | RL19_ECOLI | * Q06065 | POA7K6 | atoc_ecoli | rl19_ecoli |
| POA7K6 | RL19_ECOLI | * P36659 | POA7K6 | cbpa_ecoli | rl19_ecoli |
| POA7K6 | RL19_ECOLI | * P31469 | POA7K6 | cbrc_ecoli | rl19_ecoli |
| POA7K6 | RL19_ECOLI | * P0A6G7 | POA7K6 | clpp_ecoli | rl19_ecoli |
| POA7K6 | RL19_ECOLI | * P0A9X9 | POA7K6 | cspa_ecoli | rl19_ecoli |
| POA7K6 | RL19_ECOLI | * P0A9Y6 | POA7K6 | cspc_ecoli | rl19_ecoli |
| POA7K6 | RL19_ECOLI | * P0A968 | POA7K6 | cspd_ecoli | rl19_ecoli |
| POA7K6 | RL19_ECOLI | * P0A972 | POA7K6 | cspe_ecoli | rl19_ecoli |
| POA7K6 | RL19_ECOLI | * P16676 | POA7K6 | cysa_ecoli | rl19_ecoli |
| POA7K6 | RL19_ECOLI | * P0ACF4 | POA7K6 | dbhb_ecoli | rl19_ecoli |
| POA7K6 | RL19_ECOLI | * P0A9P6 | POA7K6 | dead_ecoli | rl19_ecoli |
| POA7K6 | RL19_ECOLI | * P0A6K6 | POA7K6 | deob_ecoli | rl19_ecoli |
| POA7K6 | RL19_ECOLI | * P0AEE8 | POA7K6 | dma_ecoli  | rl19_ecoli |
| POA7K6 | RL19_ECOLI | * P08622 | POA7K6 | dnaj_ecoli | rl19_ecoli |
| POA7K6 | RL19_ECOLI | * P0A6Y8 | POA7K6 | dnak_ecoli | rl19_ecoli |
| POA7K6 | RL19_ECOLI | * P0A6M4 | POA7K6 | dtd_ecoli  | rl19_ecoli |
| POA7K6 | RL19_ECOLI | * P0A6Q3 | POA7K6 | faba_ecoli | rl19_ecoli |
| POA7K6 | RL19_ECOLI | * P0A6Q6 | POA7K6 | fabz_ecoli | rl19_ecoli |
| POA7K6 | RL19_ECOLI | * P76503 | POA7K6 | fadi_ecoli | rl19_ecoli |
| POA7K6 | RL19_ECOLI | * P0ADH5 | POA7K6 | fimb_ecoli | rl19_ecoli |
| POA7K6 | RL19_ECOLI | * P0A6R3 | POA7K6 | fis_ecoli  | rl19_ecoli |
| POA7K6 | RL19_ECOLI | * P0AEM0 | POA7K6 | fkbx_ecoli | rl19_ecoli |
| POA7K6 | RL19_ECOLI | * P26608 | POA7K6 | flis_ecoli | rl19_ecoli |
| POA7K6 | RL19_ECOLI | * P09372 | POA7K6 | grpe_ecoli | rl19_ecoli |
| POA7K6 | RL19_ECOLI | * P09372 | POA7K6 | grpe_ecoli | rl19_ecoli |
| POA7K6 | RL19_ECOLI | * P0A6X3 | POA7K6 | hfq_ecoli  | rl19_ecoli |
| POA7K6 | RL19_ECOLI | * P67910 | POA7K6 | hldd_ecoli | rl19_ecoli |
| POA7K6 | RL19_ECOLI | * P28905 | POA7K6 | holc_ecoli | rl19_ecoli |
| POA7K6 | RL19_ECOLI | * P0ACG8 | POA7K6 | hslr_ecoli | rl19_ecoli |
| POA7K6 | RL19_ECOLI | * P0A7B8 | POA7K6 | hslv_ecoli | rl19_ecoli |
| POA7K6 | RL19_ECOLI | * P0A6Y1 | POA7K6 | ihfb_ecoli | rl19_ecoli |
| POA7K6 | RL19_ECOLI | * P0A7A9 | POA7K6 | ipyr_ecoli | rl19_ecoli |
| POA7K6 | RL19_ECOLI | * P0A715 | POA7K6 | kdsa_ecoli | rl19_ecoli |
| POA7K6 | RL19_ECOLI | * P0A715 | POA7K6 | kdsa_ecoli | rl19_ecoli |
| POA7K6 | RL19_ECOLI | * P0AC75 | POA7K6 | kdta_ecoli | rl19_ecoli |
| POA7K6 | RL19_ECOLI | * P10441 | POA7K6 | lpxb_ecoli | rl19_ecoli |
| POA7K6 | RL19_ECOLI | * P21645 | POA7K6 | lpxd_ecoli | rl19_ecoli |

|        |            |          |        |             |            |
|--------|------------|----------|--------|-------------|------------|
| POA7K6 | RL19_ECOLI | * P06993 | POA7K6 | malt_ecoli  | rl19_ecoli |
| POA7K6 | RL19_ECOLI | * P0A738 | POA7K6 | moac_ecoli  | rl19_ecoli |
| POA7K6 | RL19_ECOLI | * P17443 | POA7K6 | murg_ecoli  | rl19_ecoli |
| POA7K6 | RL19_ECOLI | * P68739 | POA7K6 | nfi_ecoli   | rl19_ecoli |
| POA7K6 | RL19_ECOLI | * P04846 | POA7K6 | nlpa_ecoli  | rl19_ecoli |
| POA7K6 | RL19_ECOLI | * P0AFF6 | POA7K6 | nusa_ecoli  | rl19_ecoli |
| POA7K6 | RL19_ECOLI | * P0AFF6 | POA7K6 | nusa_ecoli  | rl19_ecoli |
| POA7K6 | RL19_ECOLI | * P0AFI7 | POA7K6 | pdxh_ecoli  | rl19_ecoli |
| POA7K6 | RL19_ECOLI | * P0A9K3 | POA7K6 | phol_ecoli  | rl19_ecoli |
| POA7K6 | RL19_ECOLI | * P0A9K3 | POA7K6 | phol_ecoli  | rl19_ecoli |
| POA7K6 | RL19_ECOLI | * P00490 | POA7K6 | phsm_ecoli  | rl19_ecoli |
| POA7K6 | RL19_ECOLI | * P0A7A7 | POA7K6 | plsb_ecoli  | rl19_ecoli |
| POA7K6 | RL19_ECOLI | * P18133 | POA7K6 | pncb_ecoli  | rl19_ecoli |
| POA7K6 | RL19_ECOLI | * P0A9L5 | POA7K6 | ppic_ecoli  | rl19_ecoli |
| POA7K6 | RL19_ECOLI | * P05458 | POA7K6 | ptr_a_ecoli | rl19_ecoli |
| POA7K6 | RL19_ECOLI | * P0A7E9 | POA7K6 | pyrh_ecoli  | rl19_ecoli |
| POA7K6 | RL19_ECOLI | * P69405 | POA7K6 | rca_ecoli   | rl19_ecoli |
| POA7K6 | RL19_ECOLI | * P69407 | POA7K6 | rca_ecoli   | rl19_ecoli |
| POA7K6 | RL19_ECOLI | * P0AG20 | POA7K6 | rca_ecoli   | rl19_ecoli |
| POA7K6 | RL19_ECOLI | * P0A8J8 | POA7K6 | rela_ecoli  | rl19_ecoli |
| POA7K6 | RL19_ECOLI | * P25539 | POA7K6 | rhlb_ecoli  | rl19_ecoli |
| POA7K6 | RL19_ECOLI | * P63177 | POA7K6 | ribd_ecoli  | rl19_ecoli |
| POA7K6 | RL19_ECOLI | * P36979 | POA7K6 | rlmb_ecoli  | rl19_ecoli |
| POA7K6 | RL19_ECOLI | * P36979 | POA7K6 | rlmn_ecoli  | rl19_ecoli |
| POA7K6 | RL19_ECOLI | * P37765 | POA7K6 | rlmn_ecoli  | rl19_ecoli |
| POA7K6 | RL19_ECOLI | * P0AA39 | POA7K6 | rlub_ecoli  | rl19_ecoli |
| POA7K6 | RL19_ECOLI | * P0AA39 | POA7K6 | rluc_ecoli  | rl19_ecoli |
| POA7K6 | RL19_ECOLI | * P0A7Y8 | POA7K6 | rluc_ecoli  | rl19_ecoli |
| POA7K6 | RL19_ECOLI | * P0A7Z4 | POA7K6 | rnpa_ecoli  | rl19_ecoli |
| POA7K6 | RL19_ECOLI | * P0A8T7 | POA7K6 | rpoa_ecoli  | rl19_ecoli |
| POA7K6 | RL19_ECOLI | * P00579 | POA7K6 | rpoc_ecoli  | rl19_ecoli |
| POA7K6 | RL19_ECOLI | * P0A776 | POA7K6 | rpod_ecoli  | rl19_ecoli |
| POA7K6 | RL19_ECOLI | * P0A776 | POA7K6 | rpph_ecoli  | rl19_ecoli |
| POA7K6 | RL19_ECOLI | * P14081 | POA7K6 | rpph_ecoli  | rl19_ecoli |
| POA7K6 | RL19_ECOLI | * P0AEU7 | POA7K6 | selb_ecoli  | rl19_ecoli |
| POA7K6 | RL19_ECOLI | * P0AG24 | POA7K6 | skp_ecoli   | rl19_ecoli |
| POA7K6 | RL19_ECOLI | * P00960 | POA7K6 | spot_ecoli  | rl19_ecoli |
| POA7K6 | RL19_ECOLI | * P0A8M3 | POA7K6 | syga_ecoli  | rl19_ecoli |
| POA7K6 | RL19_ECOLI | * P0A847 | POA7K6 | syt_ecoli   | rl19_ecoli |
| POA7K6 | RL19_ECOLI | * P0A8I5 | POA7K6 | tgt_ecoli   | rl19_ecoli |
| POA7K6 | RL19_ECOLI | * P17993 | POA7K6 | trmb_ecoli  | rl19_ecoli |
| POA7K6 | RL19_ECOLI | * P0A9W0 | POA7K6 | ubig_ecoli  | rl19_ecoli |
| POA7K6 | RL19_ECOLI | * P46888 | POA7K6 | ular_ecoli  | rl19_ecoli |
| POA7K6 | RL19_ECOLI | * P37903 | POA7K6 | uspc_ecoli  | rl19_ecoli |
| POA7K6 | RL19_ECOLI | * P0A8G0 | POA7K6 | uspf_ecoli  | rl19_ecoli |
|        |            |          | POA7K6 | uvrc_ecoli  | rl19_ecoli |

|        |            |          |        |            |            |
|--------|------------|----------|--------|------------|------------|
| P0A7K6 | RL19_ECOLI | * P0AAB2 | P0A7K6 | wzb_ecoli  | rl19_ecoli |
| P0A7K6 | RL19_ECOLI | * P0AAS7 | P0A7K6 | ybcj_ecoli | rl19_ecoli |
| P0A7K6 | RL19_ECOLI | * P0AAT6 | P0A7K6 | ybeb_ecoli | rl19_ecoli |
| P0A7K6 | RL19_ECOLI | * P75829 | P0A7K6 | ybjx_ecoli | rl19_ecoli |
| P0A7K6 | RL19_ECOLI | * P76104 | P0A7K6 | ydcg_ecoli | rl19_ecoli |
| P0A7K6 | RL19_ECOLI | * P77564 | P0A7K6 | ydhw_ecoli | rl19_ecoli |
| P0A7K6 | RL19_ECOLI | * P33360 | P0A7K6 | yehx_ecoli | rl19_ecoli |
| P0A7K6 | RL19_ECOLI | * P77775 | P0A7K6 | yfch_ecoli | rl19_ecoli |
| P0A7K6 | RL19_ECOLI | * P63417 | P0A7K6 | yhbs_ecoli | rl19_ecoli |
| P0A7K6 | RL19_ECOLI | * P0ADK8 | P0A7K6 | yibl_ecoli | rl19_ecoli |
| P0A7K6 | RL19_ECOLI | * P39407 | P0A7K6 | yjju_ecoli | rl19_ecoli |
|        |            |          |        |            |            |
| P60422 | RL2_ECOLI  | * P24224 | P60422 | acps_ecoli | rl2_ecoli  |
| P60422 | RL2_ECOLI  | * P06134 | P60422 | ada_ecoli  | rl2_ecoli  |
| P60422 | RL2_ECOLI  | * P31441 | P60422 | adec_ecoli | rl2_ecoli  |
| P60422 | RL2_ECOLI  | * P0A9Q7 | P60422 | adhe_ecoli | rl2_ecoli  |
| P60422 | RL2_ECOLI  | * P28629 | P60422 | adia_ecoli | rl2_ecoli  |
| P60422 | RL2_ECOLI  | * P05050 | P60422 | alkb_ecoli | rl2_ecoli  |
| P60422 | RL2_ECOLI  | * P0A955 | P60422 | alkh_ecoli | rl2_ecoli  |
| P60422 | RL2_ECOLI  | * P0ACN4 | P60422 | allr_ecoli | rl2_ecoli  |
| P60422 | RL2_ECOLI  | * P05052 | P60422 | appy_ecoli | rl2_ecoli  |
| P60422 | RL2_ECOLI  | * P27254 | P60422 | argk_ecoli | rl2_ecoli  |
| P60422 | RL2_ECOLI  | * P77398 | P60422 | arna_ecoli | rl2_ecoli  |
| P60422 | RL2_ECOLI  | * P0AE37 | P60422 | asta_ecoli | rl2_ecoli  |
| P60422 | RL2_ECOLI  | * P33363 | P60422 | bglx_ecoli | rl2_ecoli  |
| P60422 | RL2_ECOLI  | * P06610 | P60422 | btue_ecoli | rl2_ecoli  |
| P60422 | RL2_ECOLI  | * P36659 | P60422 | cbpa_ecoli | rl2_ecoli  |
| P60422 | RL2_ECOLI  | * P36659 | P60422 | cbpa_ecoli | rl2_ecoli  |
| P60422 | RL2_ECOLI  | * P06961 | P60422 | cca_ecoli  | rl2_ecoli  |
| P60422 | RL2_ECOLI  | * P69490 | P60422 | ccme_ecoli | rl2_ecoli  |
| P60422 | RL2_ECOLI  | * P0ABH9 | P60422 | clpa_ecoli | rl2_ecoli  |
| P60422 | RL2_ECOLI  | * P63284 | P60422 | clpb_ecoli | rl2_ecoli  |
| P60422 | RL2_ECOLI  | * P0A9X9 | P60422 | cspa_ecoli | rl2_ecoli  |
| P60422 | RL2_ECOLI  | * P36995 | P60422 | cspb_ecoli | rl2_ecoli  |
| P60422 | RL2_ECOLI  | * P0A9Y6 | P60422 | cspc_ecoli | rl2_ecoli  |
| P60422 | RL2_ECOLI  | * P0A9Y6 | P60422 | cspc_ecoli | rl2_ecoli  |
| P60422 | RL2_ECOLI  | * P0A9Y6 | P60422 | cspc_ecoli | rl2_ecoli  |
| P60422 | RL2_ECOLI  | * P0A968 | P60422 | cspd_ecoli | rl2_ecoli  |
| P60422 | RL2_ECOLI  | * P0A972 | P60422 | cspe_ecoli | rl2_ecoli  |
| P60422 | RL2_ECOLI  | * P0A972 | P60422 | cspe_ecoli | rl2_ecoli  |
| P60422 | RL2_ECOLI  | * P0A978 | P60422 | cspg_ecoli | rl2_ecoli  |
| P60422 | RL2_ECOLI  | * P0A986 | P60422 | cspi_ecoli | rl2_ecoli  |
| P60422 | RL2_ECOLI  | * P69488 | P60422 | cuta_ecoli | rl2_ecoli  |
| P60422 | RL2_ECOLI  | * P0ACF0 | P60422 | dbha_ecoli | rl2_ecoli  |
| P60422 | RL2_ECOLI  | * P0ACF4 | P60422 | dbhb_ecoli | rl2_ecoli  |

|        |           |          |        |            |           |
|--------|-----------|----------|--------|------------|-----------|
| P60422 | RL2_ECOLI | * P0AED9 | P60422 | dcm_ecoli  | rl2_ecoli |
| P60422 | RL2_ECOLI | * P24171 | P60422 | dcp_ecoli  | rl2_ecoli |
| P60422 | RL2_ECOLI | * P37195 | P60422 | dctr_ecoli | rl2_ecoli |
| P60422 | RL2_ECOLI | * P0A9P6 | P60422 | dead_ecoli | rl2_ecoli |
| P60422 | RL2_ECOLI | * P0A9P6 | P60422 | dead_ecoli | rl2_ecoli |
| P60422 | RL2_ECOLI | * P0A6P5 | P60422 | der_ecoli  | rl2_ecoli |
| P60422 | RL2_ECOLI | * P00393 | P60422 | dhna_ecoli | rl2_ecoli |
| P60422 | RL2_ECOLI | * P66817 | P60422 | diaa_ecoli | rl2_ecoli |
| P60422 | RL2_ECOLI | * P03004 | P60422 | dnaa_ecoli | rl2_ecoli |
| P60422 | RL2_ECOLI | * P03004 | P60422 | dnaa_ecoli | rl2_ecoli |
| P60422 | RL2_ECOLI | * P37313 | P60422 | dppf_ecoli | rl2_ecoli |
| P60422 | RL2_ECOLI | * P0AEH3 | P60422 | elaa_ecoli | rl2_ecoli |
| P60422 | RL2_ECOLI | * P0AEH5 | P60422 | elab_ecoli | rl2_ecoli |
| P60422 | RL2_ECOLI | * P06616 | P60422 | era_ecoli  | rl2_ecoli |
| P60422 | RL2_ECOLI | * P76556 | P60422 | eutp_ecoli | rl2_ecoli |
| P60422 | RL2_ECOLI | * P0A6Q3 | P60422 | faba_ecoli | rl2_ecoli |
| P60422 | RL2_ECOLI | * P0A953 | P60422 | fabb_ecoli | rl2_ecoli |
| P60422 | RL2_ECOLI | * P0A6Q6 | P60422 | fabz_ecoli | rl2_ecoli |
| P60422 | RL2_ECOLI | * P21177 | P60422 | fadb_ecoli | rl2_ecoli |
| P60422 | RL2_ECOLI | * P76503 | P60422 | fadi_ecoli | rl2_ecoli |
| P60422 | RL2_ECOLI | * P0AAJ3 | P60422 | fdnh_ecoli | rl2_ecoli |
| P60422 | RL2_ECOLI | * P0ADH5 | P60422 | fimb_ecoli | rl2_ecoli |
| P60422 | RL2_ECOLI | * P0A6R3 | P60422 | fis_ecoli  | rl2_ecoli |
| P60422 | RL2_ECOLI | * P0AEM0 | P60422 | fkbx_ecoli | rl2_ecoli |
| P60422 | RL2_ECOLI | * P61949 | P60422 | flav_ecoli | rl2_ecoli |
| P60422 | RL2_ECOLI | * P0ABY4 | P60422 | flaw_ecoli | rl2_ecoli |
| P60422 | RL2_ECOLI | * P0ABW9 | P60422 | flgb_ecoli | rl2_ecoli |
| P60422 | RL2_ECOLI | * P0ABZ1 | P60422 | flig_ecoli | rl2_ecoli |
| P60422 | RL2_ECOLI | * P52612 | P60422 | flii_ecoli | rl2_ecoli |
| P60422 | RL2_ECOLI | * P06974 | P60422 | flim_ecoli | rl2_ecoli |
| P60422 | RL2_ECOLI | * P15286 | P60422 | flk_ecoli  | rl2_ecoli |
| P60422 | RL2_ECOLI | * P77609 | P60422 | flxa_ecoli | rl2_ecoli |
| P60422 | RL2_ECOLI | * P0A9R7 | P60422 | ftse_ecoli | rl2_ecoli |
| P60422 | RL2_ECOLI | * P05042 | P60422 | fumc_ecoli | rl2_ecoli |
| P60422 | RL2_ECOLI | * P0A9S3 | P60422 | gatd_ecoli | rl2_ecoli |
| P60422 | RL2_ECOLI | * P0ACL5 | P60422 | glcc_ecoli | rl2_ecoli |
| P60422 | RL2_ECOLI | * P0ACC7 | P60422 | glmu_ecoli | rl2_ecoli |
| P60422 | RL2_ECOLI | * P0A9C5 | P60422 | glna_ecoli | rl2_ecoli |
| P60422 | RL2_ECOLI | * P0A9Z1 | P60422 | glnb_ecoli | rl2_ecoli |
| P60422 | RL2_ECOLI | * P13035 | P60422 | glpd_ecoli | rl2_ecoli |
| P60422 | RL2_ECOLI | * P63228 | P60422 | gmhb_ecoli | rl2_ecoli |
| P60422 | RL2_ECOLI | * P0A6W5 | P60422 | grea_ecoli | rl2_ecoli |
| P60422 | RL2_ECOLI | * P45759 | P60422 | gspe_ecoli | rl2_ecoli |
| P60422 | RL2_ECOLI | * P32131 | P60422 | hemn_ecoli | rl2_ecoli |
| P60422 | RL2_ECOLI | * P0ABC3 | P60422 | hflc_ecoli | rl2_ecoli |

|        |           |          |        |            |           |
|--------|-----------|----------|--------|------------|-----------|
| P60422 | RL2_ECOLI | * P0A6X3 | P60422 | hfq_ecoli  | rl2_ecoli |
| P60422 | RL2_ECOLI | * P0A6X3 | P60422 | hfq_ecoli  | rl2_ecoli |
| P60422 | RL2_ECOLI | * P28631 | P60422 | holb_ecoli | rl2_ecoli |
| P60422 | RL2_ECOLI | * P28905 | P60422 | holc_ecoli | rl2_ecoli |
| P60422 | RL2_ECOLI | * P28905 | P60422 | holc_ecoli | rl2_ecoli |
| P60422 | RL2_ECOLI | * P0A6Z1 | P60422 | hsca_ecoli | rl2_ecoli |
| P60422 | RL2_ECOLI | * P0ACG8 | P60422 | hslr_ecoli | rl2_ecoli |
| P60422 | RL2_ECOLI | * P0A7B8 | P60422 | hslv_ecoli | rl2_ecoli |
| P60422 | RL2_ECOLI | * P0A6Z3 | P60422 | htpg_ecoli | rl2_ecoli |
| P60422 | RL2_ECOLI | * P0ACV0 | P60422 | htrb_ecoli | rl2_ecoli |
| P60422 | RL2_ECOLI | * P19930 | P60422 | hyad_ecoli | rl2_ecoli |
| P60422 | RL2_ECOLI | * P19931 | P60422 | hyae_ecoli | rl2_ecoli |
| P60422 | RL2_ECOLI | * P37182 | P60422 | hybd_ecoli | rl2_ecoli |
| P60422 | RL2_ECOLI | * P0AEV9 | P60422 | hyci_ecoli | rl2_ecoli |
| P60422 | RL2_ECOLI | * P71229 | P60422 | hyfr_ecoli | rl2_ecoli |
| P60422 | RL2_ECOLI | * P39346 | P60422 | idnd_ecoli | rl2_ecoli |
| P60422 | RL2_ECOLI | * P0A6Y1 | P60422 | ihfb_ecoli | rl2_ecoli |
| P60422 | RL2_ECOLI | * P32053 | P60422 | inta_ecoli | rl2_ecoli |
| P60422 | RL2_ECOLI | * P39347 | P60422 | intb_ecoli | rl2_ecoli |
| P60422 | RL2_ECOLI | * P24218 | P60422 | intd_ecoli | rl2_ecoli |
| P60422 | RL2_ECOLI | * P76168 | P60422 | intq_ecoli | rl2_ecoli |
| P60422 | RL2_ECOLI | * P0AAC8 | P60422 | isca_ecoli | rl2_ecoli |
| P60422 | RL2_ECOLI | * P0AGK8 | P60422 | iscr_ecoli | rl2_ecoli |
| P60422 | RL2_ECOLI | * P0C0L9 | P60422 | iscx_ecoli | rl2_ecoli |
| P60422 | RL2_ECOLI | * P22939 | P60422 | ispa_ecoli | rl2_ecoli |
| P60422 | RL2_ECOLI | * P0AD57 | P60422 | ispb_ecoli | rl2_ecoli |
| P60422 | RL2_ECOLI | * P0A720 | P60422 | kthy_ecoli | rl2_ecoli |
| P60422 | RL2_ECOLI | * P21645 | P60422 | lpxd_ecoli | rl2_ecoli |
| P60422 | RL2_ECOLI | * P21645 | P60422 | lpxd_ecoli | rl2_ecoli |
| P60422 | RL2_ECOLI | * P77791 | P60422 | maa_ecoli  | rl2_ecoli |
| P60422 | RL2_ECOLI | * P18811 | P60422 | mali_ecoli | rl2_ecoli |
| P60422 | RL2_ECOLI | * P23256 | P60422 | maly_ecoli | rl2_ecoli |
| P60422 | RL2_ECOLI | * P00946 | P60422 | mana_ecoli | rl2_ecoli |
| P60422 | RL2_ECOLI | * P24174 | P60422 | manc_ecoli | rl2_ecoli |
| P60422 | RL2_ECOLI | * P77455 | P60422 | maoc_ecoli | rl2_ecoli |
| P60422 | RL2_ECOLI | * P24200 | P60422 | mcra_ecoli | rl2_ecoli |
| P60422 | RL2_ECOLI | * P32716 | P60422 | mdtn_ecoli | rl2_ecoli |
| P60422 | RL2_ECOLI | * P0ACH8 | P60422 | melr_ecoli | rl2_ecoli |
| P60422 | RL2_ECOLI | * P30958 | P60422 | mfd_ecoli  | rl2_ecoli |
| P60422 | RL2_ECOLI | * P0AEI1 | P60422 | miab_ecoli | rl2_ecoli |
| P60422 | RL2_ECOLI | * P18196 | P60422 | minc_ecoli | rl2_ecoli |
| P60422 | RL2_ECOLI | * P28224 | P60422 | mlic_ecoli | rl2_ecoli |
| P60422 | RL2_ECOLI | * P25745 | P60422 | mnma_ecoli | rl2_ecoli |
| P60422 | RL2_ECOLI | * P25738 | P60422 | msyb_ecoli | rl2_ecoli |
| P60422 | RL2_ECOLI | * P40874 | P60422 | mtox_ecoli | rl2_ecoli |

|        |           |          |        |                            |                           |
|--------|-----------|----------|--------|----------------------------|---------------------------|
| P60422 | RL2_ECOLI | * P0A9H1 | P60422 | mug_ecoli                  | rl2_ecoli                 |
| P60422 | RL2_ECOLI | * P22523 | P60422 | mukb_ecoli                 | rl2_ecoli                 |
| P60422 | RL2_ECOLI | * P22523 | P60422 | mukb_ecoli                 | rl2_ecoli                 |
| P60422 | RL2_ECOLI | * P22524 | P60422 | <a href="#">muke_ecoli</a> | <a href="#">rl2_ecoli</a> |
| P60422 | RL2_ECOLI | * P06722 | P60422 | muth_ecoli                 | rl2_ecoli                 |
| P60422 | RL2_ECOLI | * P17802 | P60422 | muty_ecoli                 | rl2_ecoli                 |
| P60422 | RL2_ECOLI | * P75949 | P60422 | nagz_ecoli                 | rl2_ecoli                 |
| P60422 | RL2_ECOLI | * P0A9I5 | P60422 | napd_ecoli                 | rl2_ecoli                 |
| P60422 | RL2_ECOLI | * P33594 | P60422 | nike_ecoli                 | rl2_ecoli                 |
| P60422 | RL2_ECOLI | * Q46877 | P60422 | norv_ecoli                 | rl2_ecoli                 |
| P60422 | RL2_ECOLI | * P75960 | P60422 | npd_ecoli                  | rl2_ecoli                 |
| P60422 | RL2_ECOLI | * P52006 | P60422 | nudi_ecoli                 | rl2_ecoli                 |
| P60422 | RL2_ECOLI | * P0AFF6 | P60422 | <a href="#">nusa_ecoli</a> | <a href="#">rl2_ecoli</a> |
| P60422 | RL2_ECOLI | * P0AFF6 | P60422 | <a href="#">nusa_ecoli</a> | <a href="#">rl2_ecoli</a> |
| P60422 | RL2_ECOLI | * P0AFG0 | P60422 | nusg_ecoli                 | rl2_ecoli                 |
| P60422 | RL2_ECOLI | * P42641 | P60422 | obg_ecoli                  | rl2_ecoli                 |
| P60422 | RL2_ECOLI | * P76078 | P60422 | paab_ecoli                 | rl2_ecoli                 |
| P60422 | RL2_ECOLI | * P76086 | P60422 | paax_ecoli                 | rl2_ecoli                 |
| P60422 | RL2_ECOLI | * P0AFI2 | P60422 | <a href="#">parc_ecoli</a> | <a href="#">rl2_ecoli</a> |
| P60422 | RL2_ECOLI | * P76577 | P60422 | pbpc_ecoli                 | rl2_ecoli                 |
| P60422 | RL2_ECOLI | * P0A9K3 | P60422 | <a href="#">phol_ecoli</a> | <a href="#">rl2_ecoli</a> |
| P60422 | RL2_ECOLI | * P00914 | P60422 | phr_ecoli                  | rl2_ecoli                 |
| P60422 | RL2_ECOLI | * P0A7A7 | P60422 | plsb_ecoli                 | rl2_ecoli                 |
| P60422 | RL2_ECOLI | * P37590 | P60422 | <a href="#">pmrd_ecoli</a> | <a href="#">rl2_ecoli</a> |
| P60422 | RL2_ECOLI | * P18133 | P60422 | pncb_ecoli                 | rl2_ecoli                 |
| P60422 | RL2_ECOLI | * P05055 | P60422 | <a href="#">pnp_ecoli</a>  | <a href="#">rl2_ecoli</a> |
| P60422 | RL2_ECOLI | * P07102 | P60422 | ppa_ecoli                  | rl2_ecoli                 |
| P60422 | RL2_ECOLI | * P23538 | P60422 | <a href="#">ppsa_ecoli</a> | <a href="#">rl2_ecoli</a> |
| P60422 | RL2_ECOLI | * P17888 | P60422 | pria_ecoli                 | rl2_ecoli                 |
| P60422 | RL2_ECOLI | * P07013 | P60422 | prib_ecoli                 | rl2_ecoli                 |
| P60422 | RL2_ECOLI | * P23862 | P60422 | <a href="#">pric_ecoli</a> | <a href="#">rl2_ecoli</a> |
| P60422 | RL2_ECOLI | * P23830 | P60422 | <a href="#">pss_ecoli</a>  | <a href="#">rl2_ecoli</a> |
| P60422 | RL2_ECOLI | * P33025 | P60422 | psug_ecoli                 | rl2_ecoli                 |
| P60422 | RL2_ECOLI | * P05458 | P60422 | ptr_a_ecoli                | rl2_ecoli                 |
| P60422 | RL2_ECOLI | * P24555 | P60422 | ptrb_ecoli                 | rl2_ecoli                 |
| P60422 | RL2_ECOLI | * P33221 | P60422 | purt_ecoli                 | rl2_ecoli                 |
| P60422 | RL2_ECOLI | * P0A7E9 | P60422 | pyrh_ecoli                 | rl2_ecoli                 |
| P60422 | RL2_ECOLI | * P40719 | P60422 | qsec_ecoli                 | rl2_ecoli                 |
| P60422 | RL2_ECOLI | * P15033 | P60422 | racc_ecoli                 | rl2_ecoli                 |
| P60422 | RL2_ECOLI | * P69405 | P60422 | rca_s_ecoli                | rl2_ecoli                 |
| P60422 | RL2_ECOLI | * P0A7G6 | P60422 | <a href="#">reca_ecoli</a> | <a href="#">rl2_ecoli</a> |
| P60422 | RL2_ECOLI | * P24230 | P60422 | recg_ecoli                 | rl2_ecoli                 |
| P60422 | RL2_ECOLI | * P0AG20 | P60422 | <a href="#">rela_ecoli</a> | <a href="#">rl2_ecoli</a> |
| P60422 | RL2_ECOLI | * P27127 | P60422 | <a href="#">rfab_ecoli</a> | <a href="#">rl2_ecoli</a> |
| P60422 | RL2_ECOLI | * P24173 | P60422 | rfac_ecoli                 | rl2_ecoli                 |



|        |           |          |        |            |           |
|--------|-----------|----------|--------|------------|-----------|
| P60422 | RL2_ECOLI | * P37692 | P60422 | rfaf_ecoli | ri2_ecoli |
| P60422 | RL2_ECOLI | * P25740 | P60422 | rfag_ecoli | ri2_ecoli |
| P60422 | RL2_ECOLI | * P25741 | P60422 | rfap_ecoli | ri2_ecoli |
| P60422 | RL2_ECOLI | * P27833 | P60422 | rffa_ecoli | ri2_ecoli |
| P60422 | RL2_ECOLI | * P25888 | P60422 | rhle_ecoli | ri2_ecoli |
| P60422 | RL2_ECOLI | * P75864 | P60422 | rlml_ecoli | ri2_ecoli |
| P60422 | RL2_ECOLI | * P0ADR6 | P60422 | rlmm_ecoli | ri2_ecoli |
| P60422 | RL2_ECOLI | * P36979 | P60422 | rlmn_ecoli | ri2_ecoli |
| P60422 | RL2_ECOLI | * P36979 | P60422 | rlmn_ecoli | ri2_ecoli |
| P60422 | RL2_ECOLI | * P36979 | P60422 | rlmn_ecoli | ri2_ecoli |
| P60422 | RL2_ECOLI | * P37765 | P60422 | rlub_ecoli | ri2_ecoli |
| P60422 | RL2_ECOLI | * P0AA39 | P60422 | rluc_ecoli | ri2_ecoli |
| P60422 | RL2_ECOLI | * P0AA39 | P60422 | rluc_ecoli | ri2_ecoli |
| P60422 | RL2_ECOLI | * P0AA39 | P60422 | rluc_ecoli | ri2_ecoli |
| P60422 | RL2_ECOLI | * P33643 | P60422 | rlud_ecoli | ri2_ecoli |
| P60422 | RL2_ECOLI | * P75966 | P60422 | rlue_ecoli | ri2_ecoli |
| P60422 | RL2_ECOLI | * P21513 | P60422 | rne_ecoli  | ri2_ecoli |
| P60422 | RL2_ECOLI | * P21513 | P60422 | rne_ecoli  | ri2_ecoli |
| P60422 | RL2_ECOLI | * P21513 | P60422 | rne_ecoli  | ri2_ecoli |
| P60422 | RL2_ECOLI | * P21513 | P60422 | rne_ecoli  | ri2_ecoli |
| P60422 | RL2_ECOLI | * P21513 | P60422 | rne_ecoli  | ri2_ecoli |
| P60422 | RL2_ECOLI | * P0A9J0 | P60422 | rng_ecoli  | ri2_ecoli |
| P60422 | RL2_ECOLI | * P0A7Y4 | P60422 | rnh_ecoli  | ri2_ecoli |
| P60422 | RL2_ECOLI | * P0AFW4 | P60422 | rnk_ecoli  | ri2_ecoli |
| P60422 | RL2_ECOLI | * P0A7Y8 | P60422 | rnpa_ecoli | ri2_ecoli |
| P60422 | RL2_ECOLI | * P0A7Y8 | P60422 | rnpa_ecoli | ri2_ecoli |
| P60422 | RL2_ECOLI | * P0A7Y8 | P60422 | rnpa_ecoli | ri2_ecoli |
| P60422 | RL2_ECOLI | * P21499 | P60422 | rnrc_ecoli | ri2_ecoli |
| P60422 | RL2_ECOLI | * P21499 | P60422 | rnrc_ecoli | ri2_ecoli |
| P60422 | RL2_ECOLI | * P0A7Z4 | P60422 | rpoa_ecoli | ri2_ecoli |
| P60422 | RL2_ECOLI | * P0A7Z4 | P60422 | rpoa_ecoli | ri2_ecoli |
| P60422 | RL2_ECOLI | * P0A8V2 | P60422 | rpob_ecoli | ri2_ecoli |
| P60422 | RL2_ECOLI | * P0A8V2 | P60422 | rpob_ecoli | ri2_ecoli |
| P60422 | RL2_ECOLI | * P0A8T7 | P60422 | rpoc_ecoli | ri2_ecoli |
| P60422 | RL2_ECOLI | * P0A8T7 | P60422 | rpoc_ecoli | ri2_ecoli |
| P60422 | RL2_ECOLI | * P0A8T7 | P60422 | rpoc_ecoli | ri2_ecoli |
| P60422 | RL2_ECOLI | * P00579 | P60422 | rpod_ecoli | ri2_ecoli |
| P60422 | RL2_ECOLI | * P0A800 | P60422 | rpoz_ecoli | ri2_ecoli |
| P60422 | RL2_ECOLI | * P0A776 | P60422 | rppe_ecoli | ri2_ecoli |
| P60422 | RL2_ECOLI | * P0A776 | P60422 | rppe_ecoli | ri2_ecoli |
| P60422 | RL2_ECOLI | * P0A776 | P60422 | rppe_ecoli | ri2_ecoli |
| P60422 | RL2_ECOLI | * P36929 | P60422 | rsmb_ecoli | ri2_ecoli |
| P60422 | RL2_ECOLI | * P39406 | P60422 | rsmc_ecoli | ri2_ecoli |
| P60422 | RL2_ECOLI | * P0ADX9 | P60422 | rsmd_ecoli | ri2_ecoli |
| P60422 | RL2_ECOLI | * P75817 | P60422 | rumb_ecoli | ri2_ecoli |

|        |           |          |        |            |           |
|--------|-----------|----------|--------|------------|-----------|
| P60422 | RL2_ECOLI | * P75898 | P60422 | ruta_ecoli | rl2_ecoli |
| P60422 | RL2_ECOLI | * P0ACU2 | P60422 | ruvr_ecoli | rl2_ecoli |
| P60422 | RL2_ECOLI | * P0A8I1 | P60422 | ruvx_ecoli | rl2_ecoli |
| P60422 | RL2_ECOLI | * P14081 | P60422 | selb_ecoli | rl2_ecoli |
| P60422 | RL2_ECOLI | * P14081 | P60422 | selb_ecoli | rl2_ecoli |
| P60422 | RL2_ECOLI | * P16456 | P60422 | seld_ecoli | rl2_ecoli |
| P60422 | RL2_ECOLI | * P23721 | P60422 | serc_ecoli | rl2_ecoli |
| P60422 | RL2_ECOLI | * P0ACH1 | P60422 | sfsb_ecoli | rl2_ecoli |
| P60422 | RL2_ECOLI | * P0A828 | P60422 | smg_ecoli  | rl2_ecoli |
| P60422 | RL2_ECOLI | * P0AGD3 | P60422 | sodf_ecoli | rl2_ecoli |
| P60422 | RL2_ECOLI | * P0ACS2 | P60422 | soxr_ecoli | rl2_ecoli |
| P60422 | RL2_ECOLI | * P21170 | P60422 | spea_ecoli | rl2_ecoli |
| P60422 | RL2_ECOLI | * P0AG24 | P60422 | spot_ecoli | rl2_ecoli |
| P60422 | RL2_ECOLI | * P0AG24 | P60422 | spot_ecoli | rl2_ecoli |
| P60422 | RL2_ECOLI | * P0AFV4 | P60422 | spr_ecoli  | rl2_ecoli |
| P60422 | RL2_ECOLI | * P39902 | P60422 | sprt_ecoli | rl2_ecoli |
| P60422 | RL2_ECOLI | * P15082 | P60422 | srlr_ecoli | rl2_ecoli |
| P60422 | RL2_ECOLI | * P21507 | P60422 | srmb_ecoli | rl2_ecoli |
| P60422 | RL2_ECOLI | * P21507 | P60422 | srmb_ecoli | rl2_ecoli |
| P60422 | RL2_ECOLI | * P80644 | P60422 | ssue_ecoli | rl2_ecoli |
| P60422 | RL2_ECOLI | * P77515 | P60422 | stfq_ecoli | rl2_ecoli |
| P60422 | RL2_ECOLI | * P76072 | P60422 | stfr_ecoli | rl2_ecoli |
| P60422 | RL2_ECOLI | * P0ACG1 | P60422 | stpa_ecoli | rl2_ecoli |
| P60422 | RL2_ECOLI | * P0AG78 | P60422 | subi_ecoli | rl2_ecoli |
| P60422 | RL2_ECOLI | * P00959 | P60422 | sym_ecoli  | rl2_ecoli |
| P60422 | RL2_ECOLI | * P25397 | P60422 | tehb_ecoli | rl2_ecoli |
| P60422 | RL2_ECOLI | * P0A847 | P60422 | tgt_ecoli  | rl2_ecoli |
| P60422 | RL2_ECOLI | * P0A847 | P60422 | tgt_ecoli  | rl2_ecoli |
| P60422 | RL2_ECOLI | * P77718 | P60422 | thii_ecoli | rl2_ecoli |
| P60422 | RL2_ECOLI | * P0A850 | P60422 | tig_ecoli  | rl2_ecoli |
| P60422 | RL2_ECOLI | * P52097 | P60422 | tils_ecoli | rl2_ecoli |
| P60422 | RL2_ECOLI | * P0AGG8 | P60422 | tidd_ecoli | rl2_ecoli |
| P60422 | RL2_ECOLI | * P38684 | P60422 | torr_ecoli | rl2_ecoli |
| P60422 | RL2_ECOLI | * P36673 | P60422 | trer_ecoli | rl2_ecoli |
| P60422 | RL2_ECOLI | * P0A8I5 | P60422 | trmb_ecoli | rl2_ecoli |
| P60422 | RL2_ECOLI | * P0AGJ7 | P60422 | trml_ecoli | rl2_ecoli |
| P60422 | RL2_ECOLI | * P00895 | P60422 | trpe_ecoli | rl2_ecoli |
| P60422 | RL2_ECOLI | * P60340 | P60422 | trub_ecoli | rl2_ecoli |
| P60422 | RL2_ECOLI | * Q57261 | P60422 | trud_ecoli | rl2_ecoli |
| P60422 | RL2_ECOLI | * P0A884 | P60422 | tysy_ecoli | rl2_ecoli |
| P60422 | RL2_ECOLI | * P0AG03 | P60422 | ubix_ecoli | rl2_ecoli |
| P60422 | RL2_ECOLI | * P12295 | P60422 | ung_ecoli  | rl2_ecoli |
| P60422 | RL2_ECOLI | * P0A8G0 | P60422 | uvrc_ecoli | rl2_ecoli |
| P60422 | RL2_ECOLI | * P0A8G0 | P60422 | uvrc_ecoli | rl2_ecoli |
| P60422 | RL2_ECOLI | * P0AED5 | P60422 | uvry_ecoli | rl2_ecoli |

|        |           |          |        |            |           |
|--------|-----------|----------|--------|------------|-----------|
| P60422 | RL2_ECOLI | * P71237 | P60422 | wcac_ecoli | rl2_ecoli |
| P60422 | RL2_ECOLI | * P71242 | P60422 | wcak_ecoli | rl2_ecoli |
| P60422 | RL2_ECOLI | * P0AAB2 | P60422 | wzb_ecoli  | rl2_ecoli |
| P60422 | RL2_ECOLI | * P0A8E5 | P60422 | yacl_ecoli | rl2_ecoli |
| P60422 | RL2_ECOLI | * P0A8E5 | P60422 | yacl_ecoli | rl2_ecoli |
| P60422 | RL2_ECOLI | * P40711 | P60422 | yaej_ecoli | rl2_ecoli |
| P60422 | RL2_ECOLI | * Q47158 | P60422 | yafp_ecoli | rl2_ecoli |
| P60422 | RL2_ECOLI | * P0AAR3 | P60422 | ybak_ecoli | rl2_ecoli |
| P60422 | RL2_ECOLI | * P0A898 | P60422 | ybey_ecoli | rl2_ecoli |
| P60422 | RL2_ECOLI | * P0A8Z3 | P60422 | ybgc_ecoli | rl2_ecoli |
| P60422 | RL2_ECOLI | * P30176 | P60422 | ybia_ecoli | rl2_ecoli |
| P60422 | RL2_ECOLI | * P75828 | P60422 | ybjd_ecoli | rl2_ecoli |
| P60422 | RL2_ECOLI | * P75829 | P60422 | ybjx_ecoli | rl2_ecoli |
| P60422 | RL2_ECOLI | * P75829 | P60422 | ybjx_ecoli | rl2_ecoli |
| P60422 | RL2_ECOLI | * P75829 | P60422 | ybjx_ecoli | rl2_ecoli |
| P60422 | RL2_ECOLI | * P43340 | P60422 | ycak_ecoli | rl2_ecoli |
| P60422 | RL2_ECOLI | * P0A8N0 | P60422 | ycbg_ecoli | rl2_ecoli |
| P60422 | RL2_ECOLI | * P0AB14 | P60422 | yccj_ecoli | rl2_ecoli |
| P60422 | RL2_ECOLI | * P31545 | P60422 | ycdb_ecoli | rl2_ecoli |
| P60422 | RL2_ECOLI | * P75915 | P60422 | ycdy_ecoli | rl2_ecoli |
| P60422 | RL2_ECOLI | * P24188 | P60422 | ycea_ecoli | rl2_ecoli |
| P60422 | RL2_ECOLI | * P27431 | P60422 | ycfd_ecoli | rl2_ecoli |
| P60422 | RL2_ECOLI | * P29013 | P60422 | ycgb_ecoli | rl2_ecoli |
| P60422 | RL2_ECOLI | * P0AB43 | P60422 | ycgl_ecoli | rl2_ecoli |
| P60422 | RL2_ECOLI | * P76004 | P60422 | ycgm_ecoli | rl2_ecoli |
| P60422 | RL2_ECOLI | * P75991 | P60422 | ycgz_ecoli | rl2_ecoli |
| P60422 | RL2_ECOLI | * P37052 | P60422 | ychj_ecoli | rl2_ecoli |
| P60422 | RL2_ECOLI | * P08245 | P60422 | ycih_ecoli | rl2_ecoli |
| P60422 | RL2_ECOLI | * P77333 | P60422 | ycjz_ecoli | rl2_ecoli |
| P60422 | RL2_ECOLI | * P38394 | P60422 | ydae_ecoli | rl2_ecoli |
| P60422 | RL2_ECOLI | * P33666 | P60422 | ydba_ecoli | rl2_ecoli |
| P60422 | RL2_ECOLI | * P34209 | P60422 | ydcf_ecoli | rl2_ecoli |
| P60422 | RL2_ECOLI | * P76104 | P60422 | ydcp_ecoli | rl2_ecoli |
| P60422 | RL2_ECOLI | * P76121 | P60422 | yddh_ecoli | rl2_ecoli |
| P60422 | RL2_ECOLI | * P0ACX9 | P60422 | ydie_ecoli | rl2_ecoli |
| P60422 | RL2_ECOLI | * P64479 | P60422 | ydiz_ecoli | rl2_ecoli |
| P60422 | RL2_ECOLI | * P76243 | P60422 | yeao_ecoli | rl2_ecoli |
| P60422 | RL2_ECOLI | * P0AD05 | P60422 | yeca_ecoli | rl2_ecoli |
| P60422 | RL2_ECOLI | * P0AD07 | P60422 | yecf_ecoli | rl2_ecoli |
| P60422 | RL2_ECOLI | * P0AA31 | P60422 | yedf_ecoli | rl2_ecoli |
| P60422 | RL2_ECOLI | * P76318 | P60422 | yedk_ecoli | rl2_ecoli |
| P60422 | RL2_ECOLI | * P33020 | P60422 | yeyi_ecoli | rl2_ecoli |
| P60422 | RL2_ECOLI | * P33919 | P60422 | yejh_ecoli | rl2_ecoli |
| P60422 | RL2_ECOLI | * P17994 | P60422 | yfaa_ecoli | rl2_ecoli |
| P60422 | RL2_ECOLI | * P76483 | P60422 | yfbm_ecoli | rl2_ecoli |

|        |           |          |        |             |           |
|--------|-----------|----------|--------|-------------|-----------|
| P60422 | RL2_ECOLI | * P64540 | P60422 | yfcl_ecoli  | rl2_ecoli |
| P60422 | RL2_ECOLI | * P0AD33 | P60422 | yfcz_ecoli  | rl2_ecoli |
| P60422 | RL2_ECOLI | * P76512 | P60422 | yfdp_ecoli  | rl2_ecoli |
| P60422 | RL2_ECOLI | * P76515 | P60422 | yfds_ecoli  | rl2_ecoli |
| P60422 | RL2_ECOLI | * P27238 | P60422 | yfed_ecoli  | rl2_ecoli |
| P60422 | RL2_ECOLI | * P24178 | P60422 | yffb_ecoli  | rl2_ecoli |
| P60422 | RL2_ECOLI | * P76569 | P60422 | yfgd_ecoli  | rl2_ecoli |
| P60422 | RL2_ECOLI | * P0AGJ5 | P60422 | yfif_ecoli  | rl2_ecoli |
| P60422 | RL2_ECOLI | * P0AGJ5 | P60422 | yfif_ecoli  | rl2_ecoli |
| P60422 | RL2_ECOLI | * P0AGJ5 | P60422 | yfif_ecoli  | rl2_ecoli |
| P60422 | RL2_ECOLI | * P33644 | P60422 | yfih_ecoli  | rl2_ecoli |
| P60422 | RL2_ECOLI | * P52119 | P60422 | yfjf_ecoli  | rl2_ecoli |
| P60422 | RL2_ECOLI | * P55734 | P60422 | ygap_ecoli  | rl2_ecoli |
| P60422 | RL2_ECOLI | * P77295 | P60422 | ygav_ecoli  | rl2_ecoli |
| P60422 | RL2_ECOLI | * P64554 | P60422 | ygcf_ecoli  | rl2_ecoli |
| P60422 | RL2_ECOLI | * P76632 | P60422 | ygck_ecoli  | rl2_ecoli |
| P60422 | RL2_ECOLI | * Q46802 | P60422 | ygev_ecoli  | rl2_ecoli |
| P60422 | RL2_ECOLI | * P52043 | P60422 | ygfh_ecoli  | rl2_ecoli |
| P60422 | RL2_ECOLI | * P0ADS6 | P60422 | ygge_ecoli  | rl2_ecoli |
| P60422 | RL2_ECOLI | * P38521 | P60422 | yggI_ecoli  | rl2_ecoli |
| P60422 | RL2_ECOLI | * P67080 | P60422 | yiggs_ecoli | rl2_ecoli |
| P60422 | RL2_ECOLI | * P0ADT5 | P60422 | ygic_ecoli  | rl2_ecoli |
| P60422 | RL2_ECOLI | * P67701 | P60422 | ygjm_ecoli  | rl2_ecoli |
| P60422 | RL2_ECOLI | * P42599 | P60422 | ygjr_ecoli  | rl2_ecoli |
| P60422 | RL2_ECOLI | * P0A894 | P60422 | yhbj_ecoli  | rl2_ecoli |
| P60422 | RL2_ECOLI | * P67762 | P60422 | yhbp_ecoli  | rl2_ecoli |
| P60422 | RL2_ECOLI | * P45472 | P60422 | yhbq_ecoli  | rl2_ecoli |
| P60422 | RL2_ECOLI | * P63417 | P60422 | yhbs_ecoli  | rl2_ecoli |
| P60422 | RL2_ECOLI | * P0AGK4 | P60422 | yhby_ecoli  | rl2_ecoli |
| P60422 | RL2_ECOLI | * P0AGK4 | P60422 | yhby_ecoli  | rl2_ecoli |
| P60422 | RL2_ECOLI | * P64616 | P60422 | yhco_ecoli  | rl2_ecoli |
| P60422 | RL2_ECOLI | * P37631 | P60422 | yhin_ecoli  | rl2_ecoli |
| P60422 | RL2_ECOLI | * P0A8H6 | P60422 | yihi_ecoli  | rl2_ecoli |
| P60422 | RL2_ECOLI | * P0A8H6 | P60422 | yihi_ecoli  | rl2_ecoli |
| P60422 | RL2_ECOLI | * P09162 | P60422 | yjaa_ecoli  | rl2_ecoli |
| P60422 | RL2_ECOLI | * P32680 | P60422 | yjag_ecoli  | rl2_ecoli |
| P60422 | RL2_ECOLI | * P0A8X0 | P60422 | yjga_ecoli  | rl2_ecoli |
| P60422 | RL2_ECOLI | * P39342 | P60422 | yjgr_ecoli  | rl2_ecoli |
| P60422 | RL2_ECOLI | * P75675 | P60422 | ykfj_ecoli  | rl2_ecoli |
| P60422 | RL2_ECOLI | * P0ACA7 | P60422 | ylij_ecoli  | rl2_ecoli |
| P60422 | RL2_ECOLI | * P75992 | P60422 | ymga_ecoli  | rl2_ecoli |
| P60422 | RL2_ECOLI | * P0ACV8 | P60422 | ymja_ecoli  | rl2_ecoli |
| P60422 | RL2_ECOLI | * P76092 | P60422 | ynbc_ecoli  | rl2_ecoli |
| P60422 | RL2_ECOLI | * P76148 | P60422 | yneg_ecoli  | rl2_ecoli |
| P60422 | RL2_ECOLI | * P76222 | P60422 | ynja_ecoli  | rl2_ecoli |

|        |            |          |        |            |            |
|--------|------------|----------|--------|------------|------------|
| P60422 | RL2_ECOLI  | * P0AA57 | P60422 | yoba_ecoli | rl2_ecoli  |
| P60422 | RL2_ECOLI  | * P76280 | P60422 | yobb_ecoli | rl2_ecoli  |
| P60422 | RL2_ECOLI  | * P76539 | P60422 | ypea_ecoli | rl2_ecoli  |
| P60422 | RL2_ECOLI  | * P65367 | P60422 | yqca_ecoli | rl2_ecoli  |
| P60422 | RL2_ECOLI  | * P0A8W5 | P60422 | yqge_ecoli | rl2_ecoli  |
| P60422 | RL2_ECOLI  | * P0ADU7 | P60422 | yqib_ecoli | rl2_ecoli  |
| P60422 | RL2_ECOLI  | * P45465 | P60422 | yran_ecoli | rl2_ecoli  |
| P60422 | RL2_ECOLI  | * P0A9X1 | P60422 | znuc_ecoli | rl2_ecoli  |
|        |            |          |        |            |            |
| P0A7L3 | RL20_ECOLI | * P22333 | P0A7L3 | add_ecoli  | rl20_ecoli |
| P0A7L3 | RL20_ECOLI | * P0AEH5 | P0A7L3 | elab_ecoli | rl20_ecoli |
| P0A7L3 | RL20_ECOLI | * P0A6R3 | P0A7L3 | fis_ecoli  | rl20_ecoli |
| P0A7L3 | RL20_ECOLI | * P0ABH0 | P0A7L3 | ftsa_ecoli | rl20_ecoli |
| P0A7L3 | RL20_ECOLI | * P0A6X3 | P0A7L3 | hfq_ecoli  | rl20_ecoli |
| P0A7L3 | RL20_ECOLI | * P0A6Z1 | P0A7L3 | hsca_ecoli | rl20_ecoli |
| P0A7L3 | RL20_ECOLI | * P16528 | P0A7L3 | iclr_ecoli | rl20_ecoli |
| P0A7L3 | RL20_ECOLI | * P0AC75 | P0A7L3 | kdta_ecoli | rl20_ecoli |
| P0A7L3 | RL20_ECOLI | * P0A9M0 | P0A7L3 | lon_ecoli  | rl20_ecoli |
| P0A7L3 | RL20_ECOLI | * P0A722 | P0A7L3 | lpxa_ecoli | rl20_ecoli |
| P0A7L3 | RL20_ECOLI | * P21645 | P0A7L3 | lpxd_ecoli | rl20_ecoli |
| P0A7L3 | RL20_ECOLI | * P76086 | P0A7L3 | paax_ecoli | rl20_ecoli |
| P0A7L3 | RL20_ECOLI | * P0A9K3 | P0A7L3 | phol_ecoli | rl20_ecoli |
| P0A7L3 | RL20_ECOLI | * P69405 | P0A7L3 | rca_ecoli  | rl20_ecoli |
| P0A7L3 | RL20_ECOLI | * P61714 | P0A7L3 | risb_ecoli | rl20_ecoli |
| P0A7L3 | RL20_ECOLI | * P36979 | P0A7L3 | rlmn_ecoli | rl20_ecoli |
| P0A7L3 | RL20_ECOLI | * P0AA39 | P0A7L3 | rluc_ecoli | rl20_ecoli |
| P0A7L3 | RL20_ECOLI | * P0A7Y8 | P0A7L3 | rnpa_ecoli | rl20_ecoli |
| P0A7L3 | RL20_ECOLI | * P21499 | P0A7L3 | rnrc_ecoli | rl20_ecoli |
| P0A7L3 | RL20_ECOLI | * P0A776 | P0A7L3 | rppe_ecoli | rl20_ecoli |
| P0A7L3 | RL20_ECOLI | * P14081 | P0A7L3 | selb_ecoli | rl20_ecoli |
| P0A7L3 | RL20_ECOLI | * P15082 | P0A7L3 | srlr_ecoli | rl20_ecoli |
| P0A7L3 | RL20_ECOLI | * P0A847 | P0A7L3 | tgt_ecoli  | rl20_ecoli |
| P0A7L3 | RL20_ECOLI | * P0A8G0 | P0A7L3 | uvrc_ecoli | rl20_ecoli |
| P0A7L3 | RL20_ECOLI | * P09184 | P0A7L3 | vsr_ecoli  | rl20_ecoli |
| P0A7L3 | RL20_ECOLI | * P0A8B5 | P0A7L3 | ybab_ecoli | rl20_ecoli |
| P0A7L3 | RL20_ECOLI | * P0AAS7 | P0A7L3 | ybcj_ecoli | rl20_ecoli |
| P0A7L3 | RL20_ECOLI | * P75829 | P0A7L3 | ybjx_ecoli | rl20_ecoli |
| P0A7L3 | RL20_ECOLI | * P0AB06 | P0A7L3 | ycbk_ecoli | rl20_ecoli |
| P0A7L3 | RL20_ECOLI | * P76104 | P0A7L3 | ydcg_ecoli | rl20_ecoli |
| P0A7L3 | RL20_ECOLI | * P0AGJ5 | P0A7L3 | yfif_ecoli | rl20_ecoli |
| P0A7L3 | RL20_ECOLI | * P0ADE8 | P0A7L3 | ygfz_ecoli | rl20_ecoli |
| P0A7L3 | RL20_ECOLI | * P0AGK4 | P0A7L3 | yhby_ecoli | rl20_ecoli |
| P0A7L3 | RL20_ECOLI | * P0ADK8 | P0A7L3 | yibl_ecoli | rl20_ecoli |
|        |            |          |        |            |            |
| P0AG48 | RL21_ECOLI | * P0A9Q5 | P0AG48 | accd_ecoli | rl21_ecoli |

|        |            |          |        |                            |                            |
|--------|------------|----------|--------|----------------------------|----------------------------|
| P0AG48 | RL21_ECOLI | * P33224 | P0AG48 | <a href="#">aidb_ecoli</a> | <a href="#">rl21_ecoli</a> |
| P0AG48 | RL21_ECOLI | * P0ACN4 | P0AG48 | <a href="#">allr_ecoli</a> | <a href="#">rl21_ecoli</a> |
| P0AG48 | RL21_ECOLI | * P06709 | P0AG48 | <a href="#">bira_ecoli</a> | <a href="#">rl21_ecoli</a> |
| P0AG48 | RL21_ECOLI | * P0ABH9 | P0AG48 | <a href="#">clpa_ecoli</a> | <a href="#">rl21_ecoli</a> |
| P0AG48 | RL21_ECOLI | * P63284 | P0AG48 | <a href="#">clpb_ecoli</a> | <a href="#">rl21_ecoli</a> |
| P0AG48 | RL21_ECOLI | * P0A6G7 | P0AG48 | <a href="#">clpp_ecoli</a> | <a href="#">rl21_ecoli</a> |
| P0AG48 | RL21_ECOLI | * P0A9Y6 | P0AG48 | <a href="#">cspc_ecoli</a> | <a href="#">rl21_ecoli</a> |
| P0AG48 | RL21_ECOLI | * P0A972 | P0AG48 | <a href="#">cspe_ecoli</a> | <a href="#">rl21_ecoli</a> |
| P0AG48 | RL21_ECOLI | * P0ACF4 | P0AG48 | <a href="#">dbhb_ecoli</a> | <a href="#">rl21_ecoli</a> |
| P0AG48 | RL21_ECOLI | * P0AED9 | P0AG48 | <a href="#">dcm_ecoli</a>  | <a href="#">rl21_ecoli</a> |
| P0AG48 | RL21_ECOLI | * P0A9P6 | P0AG48 | <a href="#">dead_ecoli</a> | <a href="#">rl21_ecoli</a> |
| P0AG48 | RL21_ECOLI | * P06616 | P0AG48 | <a href="#">era_ecoli</a>  | <a href="#">rl21_ecoli</a> |
| P0AG48 | RL21_ECOLI | * P76503 | P0AG48 | <a href="#">fadi_ecoli</a> | <a href="#">rl21_ecoli</a> |
| P0AG48 | RL21_ECOLI | * P0ADH5 | P0AG48 | <a href="#">fimb_ecoli</a> | <a href="#">rl21_ecoli</a> |
| P0AG48 | RL21_ECOLI | * P0ABH0 | P0AG48 | <a href="#">ftsa_ecoli</a> | <a href="#">rl21_ecoli</a> |
| P0AG48 | RL21_ECOLI | * P0A9R7 | P0AG48 | <a href="#">ftse_ecoli</a> | <a href="#">rl21_ecoli</a> |
| P0AG48 | RL21_ECOLI | * P0AAI3 | P0AG48 | <a href="#">ftsh_ecoli</a> | <a href="#">rl21_ecoli</a> |
| P0AG48 | RL21_ECOLI | * P15038 | P0AG48 | <a href="#">held_ecoli</a> | <a href="#">rl21_ecoli</a> |
| P0AG48 | RL21_ECOLI | * P0A6X3 | P0AG48 | <a href="#">hfq_ecoli</a>  | <a href="#">rl21_ecoli</a> |
| P0AG48 | RL21_ECOLI | * P28632 | P0AG48 | <a href="#">hold_ecoli</a> | <a href="#">rl21_ecoli</a> |
| P0AG48 | RL21_ECOLI | * P0A7B8 | P0AG48 | <a href="#">hslv_ecoli</a> | <a href="#">rl21_ecoli</a> |
| P0AG48 | RL21_ECOLI | * P16528 | P0AG48 | <a href="#">iclr_ecoli</a> | <a href="#">rl21_ecoli</a> |
| P0AG48 | RL21_ECOLI | * P0A6Y1 | P0AG48 | <a href="#">ihfb_ecoli</a> | <a href="#">rl21_ecoli</a> |
| P0AG48 | RL21_ECOLI | * P0AEW6 | P0AG48 | <a href="#">ingk_ecoli</a> | <a href="#">rl21_ecoli</a> |
| P0AG48 | RL21_ECOLI | * P0A715 | P0AG48 | <a href="#">kdsa_ecoli</a> | <a href="#">rl21_ecoli</a> |
| P0AG48 | RL21_ECOLI | * P0AC75 | P0AG48 | <a href="#">kdta_ecoli</a> | <a href="#">rl21_ecoli</a> |
| P0AG48 | RL21_ECOLI | * P61316 | P0AG48 | <a href="#">lola_ecoli</a> | <a href="#">rl21_ecoli</a> |
| P0AG48 | RL21_ECOLI | * P0A9M0 | P0AG48 | <a href="#">lon_ecoli</a>  | <a href="#">rl21_ecoli</a> |
| P0AG48 | RL21_ECOLI | * P0A722 | P0AG48 | <a href="#">lpxa_ecoli</a> | <a href="#">rl21_ecoli</a> |
| P0AG48 | RL21_ECOLI | * P21645 | P0AG48 | <a href="#">lpxd_ecoli</a> | <a href="#">rl21_ecoli</a> |
| P0AG48 | RL21_ECOLI | * P21645 | P0AG48 | <a href="#">lpxd_ecoli</a> | <a href="#">rl21_ecoli</a> |
| P0AG48 | RL21_ECOLI | * P77791 | P0AG48 | <a href="#">maa_ecoli</a>  | <a href="#">rl21_ecoli</a> |
| P0AG48 | RL21_ECOLI | * P30745 | P0AG48 | <a href="#">moaa_ecoli</a> | <a href="#">rl21_ecoli</a> |
| P0AG48 | RL21_ECOLI | * P75960 | P0AG48 | <a href="#">npd_ecoli</a>  | <a href="#">rl21_ecoli</a> |
| P0AG48 | RL21_ECOLI | * P0A8D0 | P0AG48 | <a href="#">nrdr_ecoli</a> | <a href="#">rl21_ecoli</a> |
| P0AG48 | RL21_ECOLI | * P76086 | P0AG48 | <a href="#">paax_ecoli</a> | <a href="#">rl21_ecoli</a> |
| P0AG48 | RL21_ECOLI | * P0A9K3 | P0AG48 | <a href="#">phol_ecoli</a> | <a href="#">rl21_ecoli</a> |
| P0AG48 | RL21_ECOLI | * P00490 | P0AG48 | <a href="#">phsm_ecoli</a> | <a href="#">rl21_ecoli</a> |
| P0AG48 | RL21_ECOLI | * P05055 | P0AG48 | <a href="#">pnp_ecoli</a>  | <a href="#">rl21_ecoli</a> |
| P0AG48 | RL21_ECOLI | * P23830 | P0AG48 | <a href="#">pss_ecoli</a>  | <a href="#">rl21_ecoli</a> |
| P0AG48 | RL21_ECOLI | * P0A7E9 | P0AG48 | <a href="#">pyrh_ecoli</a> | <a href="#">rl21_ecoli</a> |
| P0AG48 | RL21_ECOLI | * P69405 | P0AG48 | <a href="#">rcsa_ecoli</a> | <a href="#">rl21_ecoli</a> |
| P0AG48 | RL21_ECOLI | * P0A8J8 | P0AG48 | <a href="#">rhlb_ecoli</a> | <a href="#">rl21_ecoli</a> |
| P0AG48 | RL21_ECOLI | * P25539 | P0AG48 | <a href="#">ribd_ecoli</a> | <a href="#">rl21_ecoli</a> |
| P0AG48 | RL21_ECOLI | * P61714 | P0AG48 | <a href="#">risb_ecoli</a> | <a href="#">rl21_ecoli</a> |



|        |            |          |        |            |            |
|--------|------------|----------|--------|------------|------------|
| P0AG48 | RL21_ECOLI | * P36979 | P0AG48 | rlmn_ecoli | rl21_ecoli |
| P0AG48 | RL21_ECOLI | * P37765 | P0AG48 | rlub_ecoli | rl21_ecoli |
| P0AG48 | RL21_ECOLI | * P0AA39 | P0AG48 | rluc_ecoli | rl21_ecoli |
| P0AG48 | RL21_ECOLI | * P0AA39 | P0AG48 | rluc_ecoli | rl21_ecoli |
| P0AG48 | RL21_ECOLI | * P21513 | P0AG48 | rne_ecoli  | rl21_ecoli |
| P0AG48 | RL21_ECOLI | * P0A7Y8 | P0AG48 | rnpa_ecoli | rl21_ecoli |
| P0AG48 | RL21_ECOLI | * P21499 | P0AG48 | rnrc_ecoli | rl21_ecoli |
| P0AG48 | RL21_ECOLI | * P0A7Z4 | P0AG48 | rpoa_ecoli | rl21_ecoli |
| P0AG48 | RL21_ECOLI | * P00579 | P0AG48 | rpod_ecoli | rl21_ecoli |
| P0AG48 | RL21_ECOLI | * P0A776 | P0AG48 | rpph_ecoli | rl21_ecoli |
| P0AG48 | RL21_ECOLI | * P14081 | P0AG48 | selb_ecoli | rl21_ecoli |
| P0AG48 | RL21_ECOLI | * P0AEU7 | P0AG48 | skp_ecoli  | rl21_ecoli |
| P0AG48 | RL21_ECOLI | * P0AG24 | P0AG48 | spot_ecoli | rl21_ecoli |
| P0AG48 | RL21_ECOLI | * P15082 | P0AG48 | srlr_ecoli | rl21_ecoli |
| P0AG48 | RL21_ECOLI | * P00960 | P0AG48 | syga_ecoli | rl21_ecoli |
| P0AG48 | RL21_ECOLI | * P0A847 | P0AG48 | tgt_ecoli  | rl21_ecoli |
| P0AG48 | RL21_ECOLI | * P0A9W0 | P0AG48 | ular_ecoli | rl21_ecoli |
| P0AG48 | RL21_ECOLI | * P0A8G0 | P0AG48 | uvrc_ecoli | rl21_ecoli |
| P0AG48 | RL21_ECOLI | * P0A8E5 | P0AG48 | yacl_ecoli | rl21_ecoli |
| P0AG48 | RL21_ECOLI | * P0AAS7 | P0AG48 | ybcj_ecoli | rl21_ecoli |
| P0AG48 | RL21_ECOLI | * P75767 | P0AG48 | ybhk_ecoli | rl21_ecoli |
| P0AG48 | RL21_ECOLI | * P75829 | P0AG48 | ybjx_ecoli | rl21_ecoli |
| P0AG48 | RL21_ECOLI | * Q46906 | P0AG48 | ygcp_ecoli | rl21_ecoli |
| P0AG48 | RL21_ECOLI | * P0AGK4 | P0AG48 | yhby_ecoli | rl21_ecoli |
|        |            |          |        |            |            |
| P61175 | RL22_ECOLI | * P0ABD5 | P61175 | acca_ecoli | rl22_ecoli |
| P61175 | RL22_ECOLI | * P0A9Q5 | P61175 | accd_ecoli | rl22_ecoli |
| P61175 | RL22_ECOLI | * P0A6A8 | P61175 | acp_ecoli  | rl22_ecoli |
| P61175 | RL22_ECOLI | * P33224 | P61175 | aidb_ecoli | rl22_ecoli |
| P61175 | RL22_ECOLI | * P0AE18 | P61175 | ampm_ecoli | rl22_ecoli |
| P61175 | RL22_ECOLI | * P06709 | P61175 | bira_ecoli | rl22_ecoli |
| P61175 | RL22_ECOLI | * P36659 | P61175 | cbpa_ecoli | rl22_ecoli |
| P61175 | RL22_ECOLI | * P31469 | P61175 | cbrc_ecoli | rl22_ecoli |
| P61175 | RL22_ECOLI | * P07363 | P61175 | chea_ecoli | rl22_ecoli |
| P61175 | RL22_ECOLI | * P63284 | P61175 | clpb_ecoli | rl22_ecoli |
| P61175 | RL22_ECOLI | * P36995 | P61175 | cspb_ecoli | rl22_ecoli |
| P61175 | RL22_ECOLI | * P0A9Y6 | P61175 | cspc_ecoli | rl22_ecoli |
| P61175 | RL22_ECOLI | * P0A978 | P61175 | cspg_ecoli | rl22_ecoli |
| P61175 | RL22_ECOLI | * P0AED9 | P61175 | dcm_ecoli  | rl22_ecoli |
| P61175 | RL22_ECOLI | * P0A9P6 | P61175 | dead_ecoli | rl22_ecoli |
| P61175 | RL22_ECOLI | * P0A9P6 | P61175 | dead_ecoli | rl22_ecoli |
| P61175 | RL22_ECOLI | * P0AEE8 | P61175 | dma_ecoli  | rl22_ecoli |
| P61175 | RL22_ECOLI | * P03004 | P61175 | dnaa_ecoli | rl22_ecoli |
| P61175 | RL22_ECOLI | * P08622 | P61175 | dnaj_ecoli | rl22_ecoli |
| P61175 | RL22_ECOLI | * P0A6M4 | P61175 | dtd_ecoli  | rl22_ecoli |

|        |            |          |        |            |            |
|--------|------------|----------|--------|------------|------------|
| P61175 | RL22_ECOLI | * P33371 | P61175 | disc_ecoli | rl22_ecoli |
| P61175 | RL22_ECOLI | * P0A6Q6 | P61175 | fabz_ecoli | rl22_ecoli |
| P61175 | RL22_ECOLI | * P13024 | P61175 | fdhe_ecoli | rl22_ecoli |
| P61175 | RL22_ECOLI | * P0ADH5 | P61175 | fimb_ecoli | rl22_ecoli |
| P61175 | RL22_ECOLI | * P0A6R3 | P61175 | fis_ecoli  | rl22_ecoli |
| P61175 | RL22_ECOLI | * P61949 | P61175 | flav_ecoli | rl22_ecoli |
| P61175 | RL22_ECOLI | * P0A9R7 | P61175 | ftse_ecoli | rl22_ecoli |
| P61175 | RL22_ECOLI | * P0AEN8 | P61175 | fucm_ecoli | rl22_ecoli |
| P61175 | RL22_ECOLI | * P31120 | P61175 | glmm_ecoli | rl22_ecoli |
| P61175 | RL22_ECOLI | * P17169 | P61175 | glms_ecoli | rl22_ecoli |
| P61175 | RL22_ECOLI | * P0A6X3 | P61175 | hfq_ecoli  | rl22_ecoli |
| P61175 | RL22_ECOLI | * P0ACF8 | P61175 | hns_ecoli  | rl22_ecoli |
| P61175 | RL22_ECOLI | * P28630 | P61175 | hola_ecoli | rl22_ecoli |
| P61175 | RL22_ECOLI | * P28905 | P61175 | holc_ecoli | rl22_ecoli |
| P61175 | RL22_ECOLI | * P0ACG8 | P61175 | hslr_ecoli | rl22_ecoli |
| P61175 | RL22_ECOLI | * P0A7B8 | P61175 | hslv_ecoli | rl22_ecoli |
| P61175 | RL22_ECOLI | * P0A7B8 | P61175 | hslv_ecoli | rl22_ecoli |
| P61175 | RL22_ECOLI | * P16528 | P61175 | iclr_ecoli | rl22_ecoli |
| P61175 | RL22_ECOLI | * P0A6Y1 | P61175 | ihfb_ecoli | rl22_ecoli |
| P61175 | RL22_ECOLI | * P0A7A9 | P61175 | ipyr_ecoli | rl22_ecoli |
| P61175 | RL22_ECOLI | * P0A715 | P61175 | kdsa_ecoli | rl22_ecoli |
| P61175 | RL22_ECOLI | * P0A715 | P61175 | kdsa_ecoli | rl22_ecoli |
| P61175 | RL22_ECOLI | * P0AC75 | P61175 | kdta_ecoli | rl22_ecoli |
| P61175 | RL22_ECOLI | * P60785 | P61175 | lepa_ecoli | rl22_ecoli |
| P61175 | RL22_ECOLI | * P33232 | P61175 | lidd_ecoli | rl22_ecoli |
| P61175 | RL22_ECOLI | * P61316 | P61175 | lola_ecoli | rl22_ecoli |
| P61175 | RL22_ECOLI | * P0A9M0 | P61175 | lon_ecoli  | rl22_ecoli |
| P61175 | RL22_ECOLI | * P0A722 | P61175 | lpxa_ecoli | rl22_ecoli |
| P61175 | RL22_ECOLI | * P21645 | P61175 | lpxd_ecoli | rl22_ecoli |
| P61175 | RL22_ECOLI | * P75830 | P61175 | maca_ecoli | rl22_ecoli |
| P61175 | RL22_ECOLI | * P0ACE0 | P61175 | mbhm_ecoli | rl22_ecoli |
| P61175 | RL22_ECOLI | * P25522 | P61175 | mnme_ecoli | rl22_ecoli |
| P61175 | RL22_ECOLI | * P0A738 | P61175 | moac_ecoli | rl22_ecoli |
| P61175 | RL22_ECOLI | * P22523 | P61175 | mukb_ecoli | rl22_ecoli |
| P61175 | RL22_ECOLI | * P0A749 | P61175 | mura_ecoli | rl22_ecoli |
| P61175 | RL22_ECOLI | * P04846 | P61175 | nlpa_ecoli | rl22_ecoli |
| P61175 | RL22_ECOLI | * P0AFF6 | P61175 | nusa_ecoli | rl22_ecoli |
| P61175 | RL22_ECOLI | * P0AFF6 | P61175 | nusa_ecoli | rl22_ecoli |
| P61175 | RL22_ECOLI | * P0AFG0 | P61175 | nusg_ecoli | rl22_ecoli |
| P61175 | RL22_ECOLI | * P76086 | P61175 | paax_ecoli | rl22_ecoli |
| P61175 | RL22_ECOLI | * P0AFI2 | P61175 | parc_ecoli | rl22_ecoli |
| P61175 | RL22_ECOLI | * P0A9K3 | P61175 | phol_ecoli | rl22_ecoli |
| P61175 | RL22_ECOLI | * P0A9K3 | P61175 | phol_ecoli | rl22_ecoli |
| P61175 | RL22_ECOLI | * P00490 | P61175 | phsm_ecoli | rl22_ecoli |
| P61175 | RL22_ECOLI | * P0A7A7 | P61175 | plsb_ecoli | rl22_ecoli |

|        |            |          |        |             |            |
|--------|------------|----------|--------|-------------|------------|
| P61175 | RL22_ECOLI | * P18133 | P61175 | pncb_ecoli  | rl22_ecoli |
| P61175 | RL22_ECOLI | * P05055 | P61175 | pnp_ecoli   | rl22_ecoli |
| P61175 | RL22_ECOLI | * P0A9L5 | P61175 | ppic_ecoli  | rl22_ecoli |
| P61175 | RL22_ECOLI | * P0A7D1 | P61175 | pth_ecoli   | rl22_ecoli |
| P61175 | RL22_ECOLI | * P69797 | P61175 | ptnab_ecoli | rl22_ecoli |
| P61175 | RL22_ECOLI | * P0A7E9 | P61175 | pyrh_ecoli  | rl22_ecoli |
| P61175 | RL22_ECOLI | * P69405 | P61175 | rdsa_ecoli  | rl22_ecoli |
| P61175 | RL22_ECOLI | * P69407 | P61175 | rdsb_ecoli  | rl22_ecoli |
| P61175 | RL22_ECOLI | * P21893 | P61175 | recj_ecoli  | rl22_ecoli |
| P61175 | RL22_ECOLI | * P0A8J8 | P61175 | rhlb_ecoli  | rl22_ecoli |
| P61175 | RL22_ECOLI | * P0A8J8 | P61175 | rhlb_ecoli  | rl22_ecoli |
| P61175 | RL22_ECOLI | * P45748 | P61175 | rimn_ecoli  | rl22_ecoli |
| P61175 | RL22_ECOLI | * P61714 | P61175 | risb_ecoli  | rl22_ecoli |
| P61175 | RL22_ECOLI | * P63177 | P61175 | rlmb_ecoli  | rl22_ecoli |
| P61175 | RL22_ECOLI | * P0C0R7 | P61175 | rlme_ecoli  | rl22_ecoli |
| P61175 | RL22_ECOLI | * P36979 | P61175 | rlmn_ecoli  | rl22_ecoli |
| P61175 | RL22_ECOLI | * P36979 | P61175 | rlmn_ecoli  | rl22_ecoli |
| P61175 | RL22_ECOLI | * P37765 | P61175 | rlub_ecoli  | rl22_ecoli |
| P61175 | RL22_ECOLI | * P0AA39 | P61175 | rluc_ecoli  | rl22_ecoli |
| P61175 | RL22_ECOLI | * P0AA39 | P61175 | rluc_ecoli  | rl22_ecoli |
| P61175 | RL22_ECOLI | * P21513 | P61175 | rne_ecoli   | rl22_ecoli |
| P61175 | RL22_ECOLI | * P21513 | P61175 | rne_ecoli   | rl22_ecoli |
| P61175 | RL22_ECOLI | * P0A7Y8 | P61175 | rnpa_ecoli  | rl22_ecoli |
| P61175 | RL22_ECOLI | * P21499 | P61175 | rnrc_ecoli  | rl22_ecoli |
| P61175 | RL22_ECOLI | * P0A8V2 | P61175 | rpob_ecoli  | rl22_ecoli |
| P61175 | RL22_ECOLI | * P0A8T7 | P61175 | rpoc_ecoli  | rl22_ecoli |
| P61175 | RL22_ECOLI | * P00579 | P61175 | rpod_ecoli  | rl22_ecoli |
| P61175 | RL22_ECOLI | * P0A776 | P61175 | rpph_ecoli  | rl22_ecoli |
| P61175 | RL22_ECOLI | * P0A776 | P61175 | rpph_ecoli  | rl22_ecoli |
| P61175 | RL22_ECOLI | * P39286 | P61175 | rsga_ecoli  | rl22_ecoli |
| P61175 | RL22_ECOLI | * P10408 | P61175 | seca_ecoli  | rl22_ecoli |
| P61175 | RL22_ECOLI | * P14081 | P61175 | selb_ecoli  | rl22_ecoli |
| P61175 | RL22_ECOLI | * P0AEU7 | P61175 | skp_ecoli   | rl22_ecoli |
| P61175 | RL22_ECOLI | * P0AG24 | P61175 | spot_ecoli  | rl22_ecoli |
| P61175 | RL22_ECOLI | * P0AG24 | P61175 | spot_ecoli  | rl22_ecoli |
| P61175 | RL22_ECOLI | * P15082 | P61175 | srlr_ecoli  | rl22_ecoli |
| P61175 | RL22_ECOLI | * P21507 | P61175 | srmb_ecoli  | rl22_ecoli |
| P61175 | RL22_ECOLI | * P21507 | P61175 | srmb_ecoli  | rl22_ecoli |
| P61175 | RL22_ECOLI | * P00960 | P61175 | syga_ecoli  | rl22_ecoli |
| P61175 | RL22_ECOLI | * P0A8M3 | P61175 | syt_ecoli   | rl22_ecoli |
| P61175 | RL22_ECOLI | * P00954 | P61175 | syw_ecoli   | rl22_ecoli |
| P61175 | RL22_ECOLI | * P0A847 | P61175 | tgt_ecoli   | rl22_ecoli |
| P61175 | RL22_ECOLI | * P0A850 | P61175 | tig_ecoli   | rl22_ecoli |
| P61175 | RL22_ECOLI | * P0A8I5 | P61175 | trmb_ecoli  | rl22_ecoli |
| P61175 | RL22_ECOLI | * P0A8I5 | P61175 | trmb_ecoli  | rl22_ecoli |

|        |            |          |        |            |            |
|--------|------------|----------|--------|------------|------------|
| P61175 | RL22_ECOLI | * P17993 | P61175 | ubig_ecoli | rl22_ecoli |
| P61175 | RL22_ECOLI | * P0A9W0 | P61175 | ular_ecoli | rl22_ecoli |
| P61175 | RL22_ECOLI | * P0A8G0 | P61175 | uvrc_ecoli | rl22_ecoli |
| P61175 | RL22_ECOLI | * P03018 | P61175 | uvrd_ecoli | rl22_ecoli |
| P61175 | RL22_ECOLI | * P0A8E5 | P61175 | yacl_ecoli | rl22_ecoli |
| P61175 | RL22_ECOLI | * P0AAS7 | P61175 | ybcj_ecoli | rl22_ecoli |
| P61175 | RL22_ECOLI | * P75767 | P61175 | ybhk_ecoli | rl22_ecoli |
| P61175 | RL22_ECOLI | * P75829 | P61175 | ybjx_ecoli | rl22_ecoli |
| P61175 | RL22_ECOLI | * P76104 | P61175 | ydcg_ecoli | rl22_ecoli |
| P61175 | RL22_ECOLI | * P0AD12 | P61175 | yeez_ecoli | rl22_ecoli |
| P61175 | RL22_ECOLI | * P0AGJ5 | P61175 | yfif_ecoli | rl22_ecoli |
| P61175 | RL22_ECOLI | * P76594 | P61175 | yfiq_ecoli | rl22_ecoli |
| P61175 | RL22_ECOLI | * Q46906 | P61175 | ygcp_ecoli | rl22_ecoli |
| P61175 | RL22_ECOLI | * P0A894 | P61175 | yhbh_ecoli | rl22_ecoli |
| P61175 | RL22_ECOLI | * P0ADK8 | P61175 | yibl_ecoli | rl22_ecoli |
| P61175 | RL22_ECOLI | * P0A9X1 | P61175 | znuc_ecoli | rl22_ecoli |
|        |            |          |        |            |            |
| P0ADZ0 | RL23_ECOLI | * P0ABD5 | P0ADZ0 | acca_ecoli | rl23_ecoli |
| P0ADZ0 | RL23_ECOLI | * P0AE18 | P0ADZ0 | ampm_ecoli | rl23_ecoli |
| P0ADZ0 | RL23_ECOLI | * P0ABA6 | P0ADZ0 | atpg_ecoli | rl23_ecoli |
| P0ADZ0 | RL23_ECOLI | * P0A9Y6 | P0ADZ0 | cspc_ecoli | rl23_ecoli |
| P0ADZ0 | RL23_ECOLI | * P0A9P6 | P0ADZ0 | dead_ecoli | rl23_ecoli |
| P0ADZ0 | RL23_ECOLI | * P03004 | P0ADZ0 | dnaa_ecoli | rl23_ecoli |
| P0ADZ0 | RL23_ECOLI | * P0ACB0 | P0ADZ0 | dnab_ecoli | rl23_ecoli |
| P0ADZ0 | RL23_ECOLI | * P08622 | P0ADZ0 | dnaj_ecoli | rl23_ecoli |
| P0ADZ0 | RL23_ECOLI | * P0ABT2 | P0ADZ0 | dps_ecoli  | rl23_ecoli |
| P0ADZ0 | RL23_ECOLI | * P06968 | P0ADZ0 | dut_ecoli  | rl23_ecoli |
| P0ADZ0 | RL23_ECOLI | * P0A6P9 | P0ADZ0 | eno_ecoli  | rl23_ecoli |
| P0ADZ0 | RL23_ECOLI | * P0A6R3 | P0ADZ0 | fis_ecoli  | rl23_ecoli |
| P0ADZ0 | RL23_ECOLI | * P39829 | P0ADZ0 | gard_ecoli | rl23_ecoli |
| P0ADZ0 | RL23_ECOLI | * P0AES6 | P0ADZ0 | gyrb_ecoli | rl23_ecoli |
| P0ADZ0 | RL23_ECOLI | * P0ABS8 | P0ADZ0 | hole_ecoli | rl23_ecoli |
| P0ADZ0 | RL23_ECOLI | * P0A6Y1 | P0ADZ0 | ihfb_ecoli | rl23_ecoli |
| P0ADZ0 | RL23_ECOLI | * P0A9I5 | P0ADZ0 | napd_ecoli | rl23_ecoli |
| P0ADZ0 | RL23_ECOLI | * P0AFG0 | P0ADZ0 | nusg_ecoli | rl23_ecoli |
| P0ADZ0 | RL23_ECOLI | * P0A9L5 | P0ADZ0 | ppic_ecoli | rl23_ecoli |
| P0ADZ0 | RL23_ECOLI | * P23830 | P0ADZ0 | pss_ecoli  | rl23_ecoli |
| P0ADZ0 | RL23_ECOLI | * P05458 | P0ADZ0 | ptrg_ecoli | rl23_ecoli |
| P0ADZ0 | RL23_ECOLI | * P0A7E9 | P0ADZ0 | pyrh_ecoli | rl23_ecoli |
| P0ADZ0 | RL23_ECOLI | * P69405 | P0ADZ0 | rca_e_coli | rl23_ecoli |
| P0ADZ0 | RL23_ECOLI | * P45748 | P0ADZ0 | rimn_ecoli | rl23_ecoli |
| P0ADZ0 | RL23_ECOLI | * P36979 | P0ADZ0 | rlmn_ecoli | rl23_ecoli |
| P0ADZ0 | RL23_ECOLI | * P21513 | P0ADZ0 | rne_ecoli  | rl23_ecoli |
| P0ADZ0 | RL23_ECOLI | * P21499 | P0ADZ0 | rnr_ecoli  | rl23_ecoli |
| P0ADZ0 | RL23_ECOLI | * P0A7Z4 | P0ADZ0 | rpoa_ecoli | rl23_ecoli |

|        |            |          |        |            |            |
|--------|------------|----------|--------|------------|------------|
| P0ADZ0 | RL23_ECOLI | * P0A800 | P0ADZ0 | rpoz_ecoli | rl23_ecoli |
| P0ADZ0 | RL23_ECOLI | * P39286 | P0ADZ0 | rsga_ecoli | rl23_ecoli |
| P0ADZ0 | RL23_ECOLI | * P0A809 | P0ADZ0 | ruva_ecoli | rl23_ecoli |
| P0ADZ0 | RL23_ECOLI | * P0A9K9 | P0ADZ0 | slyd_ecoli | rl23_ecoli |
| P0ADZ0 | RL23_ECOLI | * P15082 | P0ADZ0 | srlr_ecoli | rl23_ecoli |
| P0ADZ0 | RL23_ECOLI | * P21507 | P0ADZ0 | srmb_ecoli | rl23_ecoli |
| P0ADZ0 | RL23_ECOLI | * P07813 | P0ADZ0 | syl_ecoli  | rl23_ecoli |
| P0ADZ0 | RL23_ECOLI | * P0A850 | P0ADZ0 | tig_ecoli  | rl23_ecoli |
| P0ADZ0 | RL23_ECOLI | * P39177 | P0ADZ0 | uspg_ecoli | rl23_ecoli |
| P0ADZ0 | RL23_ECOLI | * P03018 | P0ADZ0 | uvrd_ecoli | rl23_ecoli |
| P0ADZ0 | RL23_ECOLI | * P28634 | P0ADZ0 | yaeb_ecoli | rl23_ecoli |
| P0ADZ0 | RL23_ECOLI | * P0AAT9 | P0ADZ0 | ybel_ecoli | rl23_ecoli |
| P0ADZ0 | RL23_ECOLI | * P0A8Z3 | P0ADZ0 | ybgc_ecoli | rl23_ecoli |
| P0ADZ0 | RL23_ECOLI | * P75767 | P0ADZ0 | ybhk_ecoli | rl23_ecoli |
| P0ADZ0 | RL23_ECOLI | * P0ACX9 | P0ADZ0 | ydie_ecoli | rl23_ecoli |
| P0ADZ0 | RL23_ECOLI | * P52126 | P0ADZ0 | yfjk_ecoli | rl23_ecoli |
| P0ADZ0 | RL23_ECOLI | * Q46904 | P0ADZ0 | ygcn_ecoli | rl23_ecoli |
| P0ADZ0 | RL23_ECOLI | * P23839 | P0ADZ0 | yicc_ecoli | rl23_ecoli |
| P0ADZ0 | RL23_ECOLI | * P39336 | P0ADZ0 | yjgl_ecoli | rl23_ecoli |
|        |            |          |        |            |            |
| P60624 | RL24_ECOLI | * P0ACN4 | P60624 | allr_ecoli | rl24_ecoli |
| P60624 | RL24_ECOLI | * P36659 | P60624 | cbpa_ecoli | rl24_ecoli |
| P60624 | RL24_ECOLI | * P0A9Y6 | P60624 | cspc_ecoli | rl24_ecoli |
| P60624 | RL24_ECOLI | * P0A968 | P60624 | cspd_ecoli | rl24_ecoli |
| P60624 | RL24_ECOLI | * P0A972 | P60624 | cspe_ecoli | rl24_ecoli |
| P60624 | RL24_ECOLI | * P0A9P6 | P60624 | dead_ecoli | rl24_ecoli |
| P60624 | RL24_ECOLI | * P03004 | P60624 | dnaa_ecoli | rl24_ecoli |
| P60624 | RL24_ECOLI | * P08622 | P60624 | dnaj_ecoli | rl24_ecoli |
| P60624 | RL24_ECOLI | * P0ABT2 | P60624 | dps_ecoli  | rl24_ecoli |
| P60624 | RL24_ECOLI | * P0ADH5 | P60624 | fimb_ecoli | rl24_ecoli |
| P60624 | RL24_ECOLI | * P0A6X3 | P60624 | hfq_ecoli  | rl24_ecoli |
| P60624 | RL24_ECOLI | * P0ACF8 | P60624 | hns_ecoli  | rl24_ecoli |
| P60624 | RL24_ECOLI | * P0A7B8 | P60624 | hslv_ecoli | rl24_ecoli |
| P60624 | RL24_ECOLI | * P16528 | P60624 | iclr_ecoli | rl24_ecoli |
| P60624 | RL24_ECOLI | * P0A715 | P60624 | kdsa_ecoli | rl24_ecoli |
| P60624 | RL24_ECOLI | * P0A715 | P60624 | kdsa_ecoli | rl24_ecoli |
| P60624 | RL24_ECOLI | * P60785 | P60624 | lepa_ecoli | rl24_ecoli |
| P60624 | RL24_ECOLI | * P0A722 | P60624 | lpxa_ecoli | rl24_ecoli |
| P60624 | RL24_ECOLI | * P21645 | P60624 | lpxd_ecoli | rl24_ecoli |
| P60624 | RL24_ECOLI | * P17443 | P60624 | murg_ecoli | rl24_ecoli |
| P60624 | RL24_ECOLI | * P0AFF6 | P60624 | nusa_ecoli | rl24_ecoli |
| P60624 | RL24_ECOLI | * P0A9K3 | P60624 | phol_ecoli | rl24_ecoli |
| P60624 | RL24_ECOLI | * P0A9K3 | P60624 | phol_ecoli | rl24_ecoli |
| P60624 | RL24_ECOLI | * P0A7A7 | P60624 | plsb_ecoli | rl24_ecoli |
| P60624 | RL24_ECOLI | * P05055 | P60624 | pnp_ecoli  | rl24_ecoli |

|        |            |   |        |        |            |            |
|--------|------------|---|--------|--------|------------|------------|
| P60624 | RL24_ECOLI | * | P36979 | P60624 | rlmn_ecoli | rl24_ecoli |
| P60624 | RL24_ECOLI | * | P36979 | P60624 | rlmn_ecoli | rl24_ecoli |
| P60624 | RL24_ECOLI | * | P37765 | P60624 | rlub_ecoli | rl24_ecoli |
| P60624 | RL24_ECOLI | * | P0AA39 | P60624 | rluc_ecoli | rl24_ecoli |
| P60624 | RL24_ECOLI | * | P0AA39 | P60624 | rluc_ecoli | rl24_ecoli |
| P60624 | RL24_ECOLI | * | P21513 | P60624 | rne_ecoli  | rl24_ecoli |
| P60624 | RL24_ECOLI | * | P0A7Y8 | P60624 | rnpa_ecoli | rl24_ecoli |
| P60624 | RL24_ECOLI | * | P21499 | P60624 | rnr_ecoli  | rl24_ecoli |
| P60624 | RL24_ECOLI | * | P0A7Z4 | P60624 | rpoa_ecoli | rl24_ecoli |
| P60624 | RL24_ECOLI | * | P0A8T7 | P60624 | rpoc_ecoli | rl24_ecoli |
| P60624 | RL24_ECOLI | * | P0A776 | P60624 | rpph_ecoli | rl24_ecoli |
| P60624 | RL24_ECOLI | * | P14081 | P60624 | selb_ecoli | rl24_ecoli |
| P60624 | RL24_ECOLI | * | P0AEU7 | P60624 | skp_ecoli  | rl24_ecoli |
| P60624 | RL24_ECOLI | * | P0AG24 | P60624 | spot_ecoli | rl24_ecoli |
| P60624 | RL24_ECOLI | * | P21507 | P60624 | srmb_ecoli | rl24_ecoli |
| P60624 | RL24_ECOLI | * | P21507 | P60624 | srmb_ecoli | rl24_ecoli |
| P60624 | RL24_ECOLI | * | P0A832 | P60624 | ssrp_ecoli | rl24_ecoli |
| P60624 | RL24_ECOLI | * | P0A847 | P60624 | tgt_ecoli  | rl24_ecoli |
| P60624 | RL24_ECOLI | * | P0A8I5 | P60624 | trmb_ecoli | rl24_ecoli |
| P60624 | RL24_ECOLI | * | P0AAS7 | P60624 | ybcj_ecoli | rl24_ecoli |
| P60624 | RL24_ECOLI | * | P75829 | P60624 | ybjx_ecoli | rl24_ecoli |
| P60624 | RL24_ECOLI | * | P76104 | P60624 | ydcp_ecoli | rl24_ecoli |
| P60624 | RL24_ECOLI | * | P39283 | P60624 | yjen_ecoli | rl24_ecoli |
|        |            |   |        |        |            |            |
| P68919 | RL25_ECOLI | * | P0A715 | P68919 | kdsa_ecoli | rl25_ecoli |
| P68919 | RL25_ECOLI | * | P0A9K3 | P68919 | phol_ecoli | rl25_ecoli |
| P68919 | RL25_ECOLI | * | P37765 | P68919 | rlub_ecoli | rl25_ecoli |
| P68919 | RL25_ECOLI | * | P0A776 | P68919 | rpph_ecoli | rl25_ecoli |
| P68919 | RL25_ECOLI | * | P14081 | P68919 | selb_ecoli | rl25_ecoli |
| P68919 | RL25_ECOLI | * | P30139 | P68919 | thig_ecoli | rl25_ecoli |
| P68919 | RL25_ECOLI | * | P0A8G0 | P68919 | uvrc_ecoli | rl25_ecoli |
| P68919 | RL25_ECOLI | * | P76539 | P68919 | ypea_ecoli | rl25_ecoli |
|        |            |   |        |        |            |            |
| P0A7L8 | RL27_ECOLI | * | P0ABH9 | P0A7L8 | clpa_ecoli | rl27_ecoli |
| P0A7L8 | RL27_ECOLI | * | P0A9P6 | P0A7L8 | dead_ecoli | rl27_ecoli |
| P0A7L8 | RL27_ECOLI | * | P0AES4 | P0A7L8 | gyra_ecoli | rl27_ecoli |
| P0A7L8 | RL27_ECOLI | * | P76346 | P0A7L8 | mtfa_ecoli | rl27_ecoli |
| P0A7L8 | RL27_ECOLI | * | P0AFI2 | P0A7L8 | parc_ecoli | rl27_ecoli |
| P0A7L8 | RL27_ECOLI | * | P0A7E9 | P0A7L8 | pyrh_ecoli | rl27_ecoli |
| P0A7L8 | RL27_ECOLI | * | P36979 | P0A7L8 | rlmn_ecoli | rl27_ecoli |
| P0A7L8 | RL27_ECOLI | * | P0A7Z4 | P0A7L8 | rpoa_ecoli | rl27_ecoli |
| P0A7L8 | RL27_ECOLI | * | P0A9K9 | P0A7L8 | slyd_ecoli | rl27_ecoli |
| P0A7L8 | RL27_ECOLI | * | P0AAT9 | P0A7L8 | ybel_ecoli | rl27_ecoli |
|        |            |   |        |        |            |            |
| P0A7M2 | RL28_ECOLI | * | P0A6A3 | P0A7M2 | acka_ecoli | rl28_ecoli |



|        |            |   |        |        |                             |                            |
|--------|------------|---|--------|--------|-----------------------------|----------------------------|
| POA7M2 | RL28_ECOLI | * | P0A6A8 | POA7M2 | <a href="#">acp_ecoli</a>   | <a href="#">rl28_ecoli</a> |
| POA7M2 | RL28_ECOLI | * | P0A9Q7 | POA7M2 | <a href="#">adhe_ecoli</a>  | <a href="#">rl28_ecoli</a> |
| POA7M2 | RL28_ECOLI | * | P33224 | POA7M2 | <a href="#">aidb_ecoli</a>  | <a href="#">rl28_ecoli</a> |
| POA7M2 | RL28_ECOLI | * | P0AE18 | POA7M2 | <a href="#">ampm_ecoli</a>  | <a href="#">rl28_ecoli</a> |
| POA7M2 | RL28_ECOLI | * | P02924 | POA7M2 | <a href="#">araf_ecoli</a>  | <a href="#">rl28_ecoli</a> |
| POA7M2 | RL28_ECOLI | * | P0AE28 | POA7M2 | <a href="#">arom_ecoli</a>  | <a href="#">rl28_ecoli</a> |
| POA7M2 | RL28_ECOLI | * | P0A6E6 | POA7M2 | <a href="#">atpe_ecoli</a>  | <a href="#">rl28_ecoli</a> |
| POA7M2 | RL28_ECOLI | * | P07363 | POA7M2 | <a href="#">chea_ecoli</a>  | <a href="#">rl28_ecoli</a> |
| POA7M2 | RL28_ECOLI | * | P0AE72 | POA7M2 | <a href="#">chpr_ecoli</a>  | <a href="#">rl28_ecoli</a> |
| POA7M2 | RL28_ECOLI | * | P0A6G7 | POA7M2 | <a href="#">clpp_ecoli</a>  | <a href="#">rl28_ecoli</a> |
| POA7M2 | RL28_ECOLI | * | P0A9P6 | POA7M2 | <a href="#">dead_ecoli</a>  | <a href="#">rl28_ecoli</a> |
| POA7M2 | RL28_ECOLI | * | P03004 | POA7M2 | <a href="#">dnaa_ecoli</a>  | <a href="#">rl28_ecoli</a> |
| POA7M2 | RL28_ECOLI | * | P76503 | POA7M2 | <a href="#">fadi_ecoli</a>  | <a href="#">rl28_ecoli</a> |
| POA7M2 | RL28_ECOLI | * | P32177 | POA7M2 | <a href="#">fdhd_ecoli</a>  | <a href="#">rl28_ecoli</a> |
| POA7M2 | RL28_ECOLI | * | P0ADH5 | POA7M2 | <a href="#">fimb_ecoli</a>  | <a href="#">rl28_ecoli</a> |
| POA7M2 | RL28_ECOLI | * | P61949 | POA7M2 | <a href="#">flav_ecoli</a>  | <a href="#">rl28_ecoli</a> |
| POA7M2 | RL28_ECOLI | * | P0ABX8 | POA7M2 | <a href="#">flii_ecoli</a>  | <a href="#">rl28_ecoli</a> |
| POA7M2 | RL28_ECOLI | * | P77609 | POA7M2 | <a href="#">flxa_ecoli</a>  | <a href="#">rl28_ecoli</a> |
| POA7M2 | RL28_ECOLI | * | P62707 | POA7M2 | <a href="#">gpma_ecoli</a>  | <a href="#">rl28_ecoli</a> |
| POA7M2 | RL28_ECOLI | * | P0A6X3 | POA7M2 | <a href="#">hfq_ecoli</a>   | <a href="#">rl28_ecoli</a> |
| POA7M2 | RL28_ECOLI | * | P28631 | POA7M2 | <a href="#">holb_ecoli</a>  | <a href="#">rl28_ecoli</a> |
| POA7M2 | RL28_ECOLI | * | P28905 | POA7M2 | <a href="#">holc_ecoli</a>  | <a href="#">rl28_ecoli</a> |
| POA7M2 | RL28_ECOLI | * | P28632 | POA7M2 | <a href="#">hold_ecoli</a>  | <a href="#">rl28_ecoli</a> |
| POA7M2 | RL28_ECOLI | * | P0ACG8 | POA7M2 | <a href="#">hslr_ecoli</a>  | <a href="#">rl28_ecoli</a> |
| POA7M2 | RL28_ECOLI | * | P0ADG1 | POA7M2 | <a href="#">ilvm_ecoli</a>  | <a href="#">rl28_ecoli</a> |
| POA7M2 | RL28_ECOLI | * | P76168 | POA7M2 | <a href="#">intq_ecoli</a>  | <a href="#">rl28_ecoli</a> |
| POA7M2 | RL28_ECOLI | * | P0A7A9 | POA7M2 | <a href="#">ipy_r_ecoli</a> | <a href="#">rl28_ecoli</a> |
| POA7M2 | RL28_ECOLI | * | P0A715 | POA7M2 | <a href="#">kdsa_ecoli</a>  | <a href="#">rl28_ecoli</a> |
| POA7M2 | RL28_ECOLI | * | P33232 | POA7M2 | <a href="#">lidd_ecoli</a>  | <a href="#">rl28_ecoli</a> |
| POA7M2 | RL28_ECOLI | * | P0A722 | POA7M2 | <a href="#">lpxa_ecoli</a>  | <a href="#">rl28_ecoli</a> |
| POA7M2 | RL28_ECOLI | * | P75830 | POA7M2 | <a href="#">maca_ecoli</a>  | <a href="#">rl28_ecoli</a> |
| POA7M2 | RL28_ECOLI | * | P24175 | POA7M2 | <a href="#">manb_ecoli</a>  | <a href="#">rl28_ecoli</a> |
| POA7M2 | RL28_ECOLI | * | P0ACE0 | POA7M2 | <a href="#">mbhm_ecoli</a>  | <a href="#">rl28_ecoli</a> |
| POA7M2 | RL28_ECOLI | * | P54746 | POA7M2 | <a href="#">mngb_ecoli</a>  | <a href="#">rl28_ecoli</a> |
| POA7M2 | RL28_ECOLI | * | P13669 | POA7M2 | <a href="#">mngr_ecoli</a>  | <a href="#">rl28_ecoli</a> |
| POA7M2 | RL28_ECOLI | * | P0AEZ9 | POA7M2 | <a href="#">moab_ecoli</a>  | <a href="#">rl28_ecoli</a> |
| POA7M2 | RL28_ECOLI | * | P0A738 | POA7M2 | <a href="#">moac_ecoli</a>  | <a href="#">rl28_ecoli</a> |
| POA7M2 | RL28_ECOLI | * | P0A738 | POA7M2 | <a href="#">moac_ecoli</a>  | <a href="#">rl28_ecoli</a> |
| POA7M2 | RL28_ECOLI | * | P30749 | POA7M2 | <a href="#">moae_ecoli</a>  | <a href="#">rl28_ecoli</a> |
| POA7M2 | RL28_ECOLI | * | P31060 | POA7M2 | <a href="#">modf_ecoli</a>  | <a href="#">rl28_ecoli</a> |
| POA7M2 | RL28_ECOLI | * | P25738 | POA7M2 | <a href="#">msyb_ecoli</a>  | <a href="#">rl28_ecoli</a> |
| POA7M2 | RL28_ECOLI | * | P22523 | POA7M2 | <a href="#">mukb_ecoli</a>  | <a href="#">rl28_ecoli</a> |
| POA7M2 | RL28_ECOLI | * | P0AF20 | POA7M2 | <a href="#">nagc_ecoli</a>  | <a href="#">rl28_ecoli</a> |
| POA7M2 | RL28_ECOLI | * | P33937 | POA7M2 | <a href="#">napa_ecoli</a>  | <a href="#">rl28_ecoli</a> |
| POA7M2 | RL28_ECOLI | * | P68739 | POA7M2 | <a href="#">nfi_ecoli</a>   | <a href="#">rl28_ecoli</a> |

|        |            |   |        |        |             |            |
|--------|------------|---|--------|--------|-------------|------------|
| POA7M2 | RL28_ECOLI | * | P0AFG0 | POA7M2 | nusg_ecoli  | rl28_ecoli |
| POA7M2 | RL28_ECOLI | * | P76086 | POA7M2 | paax_ecoli  | rl28_ecoli |
| POA7M2 | RL28_ECOLI | * | P76086 | POA7M2 | paax_ecoli  | rl28_ecoli |
| POA7M2 | RL28_ECOLI | * | P0ACL9 | POA7M2 | pdhr_ecoli  | rl28_ecoli |
| POA7M2 | RL28_ECOLI | * | P0A9K3 | POA7M2 | phol_ecoli  | rl28_ecoli |
| POA7M2 | RL28_ECOLI | * | P0A7A7 | POA7M2 | plsb_ecoli  | rl28_ecoli |
| POA7M2 | RL28_ECOLI | * | P0A7D1 | POA7M2 | pth_ecoli   | rl28_ecoli |
| POA7M2 | RL28_ECOLI | * | P69797 | POA7M2 | ptnab_ecoli | rl28_ecoli |
| POA7M2 | RL28_ECOLI | * | P0AD49 | POA7M2 | raia_ecoli  | rl28_ecoli |
| POA7M2 | RL28_ECOLI | * | P69407 | POA7M2 | rccb_ecoli  | rl28_ecoli |
| POA7M2 | RL28_ECOLI | * | P21893 | POA7M2 | recj_ecoli  | rl28_ecoli |
| POA7M2 | RL28_ECOLI | * | P15043 | POA7M2 | recq_ecoli  | rl28_ecoli |
| POA7M2 | RL28_ECOLI | * | P0A8J8 | POA7M2 | rhlb_ecoli  | rl28_ecoli |
| POA7M2 | RL28_ECOLI | * | P25888 | POA7M2 | rhle_ecoli  | rl28_ecoli |
| POA7M2 | RL28_ECOLI | * | P63177 | POA7M2 | rlmb_ecoli  | rl28_ecoli |
| POA7M2 | RL28_ECOLI | * | P36979 | POA7M2 | rlmn_ecoli  | rl28_ecoli |
| POA7M2 | RL28_ECOLI | * | P37765 | POA7M2 | rlub_ecoli  | rl28_ecoli |
| POA7M2 | RL28_ECOLI | * | P0AA39 | POA7M2 | rluc_ecoli  | rl28_ecoli |
| POA7M2 | RL28_ECOLI | * | P21513 | POA7M2 | rne_ecoli   | rl28_ecoli |
| POA7M2 | RL28_ECOLI | * | P21513 | POA7M2 | rne_ecoli   | rl28_ecoli |
| POA7M2 | RL28_ECOLI | * | P0A7Y4 | POA7M2 | rnh_ecoli   | rl28_ecoli |
| POA7M2 | RL28_ECOLI | * | P0A7Z4 | POA7M2 | rpoa_ecoli  | rl28_ecoli |
| POA7M2 | RL28_ECOLI | * | P00579 | POA7M2 | rpod_ecoli  | rl28_ecoli |
| POA7M2 | RL28_ECOLI | * | P0A776 | POA7M2 | rpph_ecoli  | rl28_ecoli |
| POA7M2 | RL28_ECOLI | * | P0ACU2 | POA7M2 | rutr_ecoli  | rl28_ecoli |
| POA7M2 | RL28_ECOLI | * | P14081 | POA7M2 | selb_ecoli  | rl28_ecoli |
| POA7M2 | RL28_ECOLI | * | P0AG24 | POA7M2 | spot_ecoli  | rl28_ecoli |
| POA7M2 | RL28_ECOLI | * | P0A832 | POA7M2 | ssrp_ecoli  | rl28_ecoli |
| POA7M2 | RL28_ECOLI | * | P00960 | POA7M2 | syga_ecoli  | rl28_ecoli |
| POA7M2 | RL28_ECOLI | * | P0A847 | POA7M2 | tgt_ecoli   | rl28_ecoli |
| POA7M2 | RL28_ECOLI | * | P30139 | POA7M2 | thig_ecoli  | rl28_ecoli |
| POA7M2 | RL28_ECOLI | * | P0AGG0 | POA7M2 | thil_ecoli  | rl28_ecoli |
| POA7M2 | RL28_ECOLI | * | P0A850 | POA7M2 | tig_ecoli   | rl28_ecoli |
| POA7M2 | RL28_ECOLI | * | P0A850 | POA7M2 | tig_ecoli   | rl28_ecoli |
| POA7M2 | RL28_ECOLI | * | P19934 | POA7M2 | tola_ecoli  | rl28_ecoli |
| POA7M2 | RL28_ECOLI | * | P0A858 | POA7M2 | tpis_ecoli  | rl28_ecoli |
| POA7M2 | RL28_ECOLI | * | P26602 | POA7M2 | ubic_ecoli  | rl28_ecoli |
| POA7M2 | RL28_ECOLI | * | P0A9W0 | POA7M2 | ular_ecoli  | rl28_ecoli |
| POA7M2 | RL28_ECOLI | * | P46888 | POA7M2 | uspc_ecoli  | rl28_ecoli |
| POA7M2 | RL28_ECOLI | * | P0A8F8 | POA7M2 | uvrb_ecoli  | rl28_ecoli |
| POA7M2 | RL28_ECOLI | * | P0A8G0 | POA7M2 | uvrc_ecoli  | rl28_ecoli |
| POA7M2 | RL28_ECOLI | * | P0AAB2 | POA7M2 | wzb_ecoli   | rl28_ecoli |
| POA7M2 | RL28_ECOLI | * | P0A8E5 | POA7M2 | yacl_ecoli  | rl28_ecoli |
| POA7M2 | RL28_ECOLI | * | P77634 | POA7M2 | ybcm_ecoli  | rl28_ecoli |
| POA7M2 | RL28_ECOLI | * | P75829 | POA7M2 | ybjx_ecoli  | rl28_ecoli |

|        |            |          |        |            |            |
|--------|------------|----------|--------|------------|------------|
| P0A7M2 | RL28_ECOLI | * P76164 | P0A7M2 | ydfw_ecoli | rl28_ecoli |
| P0A7M2 | RL28_ECOLI | * P76569 | P0A7M2 | yfgd_ecoli | rl28_ecoli |
| P0A7M2 | RL28_ECOLI | * P76578 | P0A7M2 | yfhm_ecoli | rl28_ecoli |
| P0A7M2 | RL28_ECOLI | * P76594 | P0A7M2 | yfiq_ecoli | rl28_ecoli |
| P0A7M2 | RL28_ECOLI | * Q46905 | P0A7M2 | ygco_ecoli | rl28_ecoli |
| P0A7M2 | RL28_ECOLI | * P38521 | P0A7M2 | yggf_ecoli | rl28_ecoli |
| P0A7M2 | RL28_ECOLI | * P30871 | P0A7M2 | ygif_ecoli | rl28_ecoli |
| P0A7M2 | RL28_ECOLI | * P0ADJ3 | P0A7M2 | yhjr_ecoli | rl28_ecoli |
| P0A7M2 | RL28_ECOLI | * P0ADK8 | P0A7M2 | yibl_ecoli | rl28_ecoli |
| P0A7M2 | RL28_ECOLI | * P56259 | P0A7M2 | yifn_ecoli | rl28_ecoli |
| P0A7M2 | RL28_ECOLI | * P39407 | P0A7M2 | yjju_ecoli | rl28_ecoli |
| P0A7M2 | RL28_ECOLI | * P75675 | P0A7M2 | ykfj_ecoli | rl28_ecoli |
| P0A7M2 | RL28_ECOLI | * P77379 | P0A7M2 | ykgd_ecoli | rl28_ecoli |
| P0A7M2 | RL28_ECOLI | * P75994 | P0A7M2 | ymgc_ecoli | rl28_ecoli |
| P0A7M2 | RL28_ECOLI | * P76539 | P0A7M2 | ypea_ecoli | rl28_ecoli |
| P0A7M2 | RL28_ECOLI | * P45465 | P0A7M2 | yran_ecoli | rl28_ecoli |
|        |            |          |        |            |            |
| P60438 | RL3_ECOLI  | * P0ABD5 | P60438 | acca_ecoli | rl3_ecoli  |
| P60438 | RL3_ECOLI  | * P24182 | P60438 | accg_ecoli | rl3_ecoli  |
| P60438 | RL3_ECOLI  | * P33224 | P60438 | aidb_ecoli | rl3_ecoli  |
| P60438 | RL3_ECOLI  | * P33224 | P60438 | aidb_ecoli | rl3_ecoli  |
| P60438 | RL3_ECOLI  | * P36659 | P60438 | cbpa_ecoli | rl3_ecoli  |
| P60438 | RL3_ECOLI  | * P06961 | P60438 | cca_ecoli  | rl3_ecoli  |
| P60438 | RL3_ECOLI  | * P0AE60 | P60438 | ceda_ecoli | rl3_ecoli  |
| P60438 | RL3_ECOLI  | * P0ABH9 | P60438 | clpa_ecoli | rl3_ecoli  |
| P60438 | RL3_ECOLI  | * P63284 | P60438 | clpb_ecoli | rl3_ecoli  |
| P60438 | RL3_ECOLI  | * P0A6G7 | P60438 | clpp_ecoli | rl3_ecoli  |
| P60438 | RL3_ECOLI  | * P0A6I6 | P60438 | coad_ecoli | rl3_ecoli  |
| P60438 | RL3_ECOLI  | * P0ACJ8 | P60438 | crp_ecoli  | rl3_ecoli  |
| P60438 | RL3_ECOLI  | * P0A9X9 | P60438 | cspa_ecoli | rl3_ecoli  |
| P60438 | RL3_ECOLI  | * P0A9X9 | P60438 | cspa_ecoli | rl3_ecoli  |
| P60438 | RL3_ECOLI  | * P0A9X9 | P60438 | cspa_ecoli | rl3_ecoli  |
| P60438 | RL3_ECOLI  | * P36995 | P60438 | cspb_ecoli | rl3_ecoli  |
| P60438 | RL3_ECOLI  | * P0A9Y6 | P60438 | cspc_ecoli | rl3_ecoli  |
| P60438 | RL3_ECOLI  | * P0A9Y6 | P60438 | cspc_ecoli | rl3_ecoli  |
| P60438 | RL3_ECOLI  | * P0A968 | P60438 | cspd_ecoli | rl3_ecoli  |
| P60438 | RL3_ECOLI  | * P0A968 | P60438 | cspd_ecoli | rl3_ecoli  |
| P60438 | RL3_ECOLI  | * P0A972 | P60438 | cspe_ecoli | rl3_ecoli  |
| P60438 | RL3_ECOLI  | * P0A972 | P60438 | cspe_ecoli | rl3_ecoli  |
| P60438 | RL3_ECOLI  | * P0A978 | P60438 | cspg_ecoli | rl3_ecoli  |
| P60438 | RL3_ECOLI  | * P0ACF4 | P60438 | dbhb_ecoli | rl3_ecoli  |
| P60438 | RL3_ECOLI  | * P0ACF4 | P60438 | dbhb_ecoli | rl3_ecoli  |
| P60438 | RL3_ECOLI  | * P0AED9 | P60438 | dcm_ecoli  | rl3_ecoli  |
| P60438 | RL3_ECOLI  | * P76316 | P60438 | dcyd_ecoli | rl3_ecoli  |
| P60438 | RL3_ECOLI  | * P0A9P6 | P60438 | dead_ecoli | rl3_ecoli  |

|        |           |          |        |             |           |
|--------|-----------|----------|--------|-------------|-----------|
| P60438 | RL3_ECOLI | * P03004 | P60438 | dnaa_ecoli  | rl3_ecoli |
| P60438 | RL3_ECOLI | * P77202 | P60438 | dsbg_ecoli  | rl3_ecoli |
| P60438 | RL3_ECOLI | * P0A6M4 | P60438 | dtd_ecoli   | rl3_ecoli |
| P60438 | RL3_ECOLI | * P0A6Q6 | P60438 | fabz_ecoli  | rl3_ecoli |
| P60438 | RL3_ECOLI | * P0ADH5 | P60438 | fimb_ecoli  | rl3_ecoli |
| P60438 | RL3_ECOLI | * P0A6R3 | P60438 | fis_ecoli   | rl3_ecoli |
| P60438 | RL3_ECOLI | * P0AEM0 | P60438 | fbxb_ecoli  | rl3_ecoli |
| P60438 | RL3_ECOLI | * P30128 | P60438 | greb_ecoli  | rl3_ecoli |
| P60438 | RL3_ECOLI | * P15038 | P60438 | held_ecoli  | rl3_ecoli |
| P60438 | RL3_ECOLI | * P0A6X3 | P60438 | hfq_ecoli   | rl3_ecoli |
| P60438 | RL3_ECOLI | * P0A6X3 | P60438 | hfq_ecoli   | rl3_ecoli |
| P60438 | RL3_ECOLI | * P67910 | P60438 | hldd_ecoli  | rl3_ecoli |
| P60438 | RL3_ECOLI | * P34749 | P60438 | hofq_ecoli  | rl3_ecoli |
| P60438 | RL3_ECOLI | * P28631 | P60438 | holb_ecoli  | rl3_ecoli |
| P60438 | RL3_ECOLI | * P28905 | P60438 | holc_ecoli  | rl3_ecoli |
| P60438 | RL3_ECOLI | * P28905 | P60438 | holc_ecoli  | rl3_ecoli |
| P60438 | RL3_ECOLI | * P28632 | P60438 | hold_ecoli  | rl3_ecoli |
| P60438 | RL3_ECOLI | * P0A6Y5 | P60438 | hslo_ecoli  | rl3_ecoli |
| P60438 | RL3_ECOLI | * P0A6H5 | P60438 | hslu_ecoli  | rl3_ecoli |
| P60438 | RL3_ECOLI | * P0A7B8 | P60438 | hslv_ecoli  | rl3_ecoli |
| P60438 | RL3_ECOLI | * P0A7B8 | P60438 | hslv_ecoli  | rl3_ecoli |
| P60438 | RL3_ECOLI | * P0A6X7 | P60438 | ihfa_ecoli  | rl3_ecoli |
| P60438 | RL3_ECOLI | * P0A6Y1 | P60438 | ihfb_ecoli  | rl3_ecoli |
| P60438 | RL3_ECOLI | * P0A7A9 | P60438 | ipyrc_ecoli | rl3_ecoli |
| P60438 | RL3_ECOLI | * P22939 | P60438 | ispa_ecoli  | rl3_ecoli |
| P60438 | RL3_ECOLI | * P0A715 | P60438 | kdsa_ecoli  | rl3_ecoli |
| P60438 | RL3_ECOLI | * P0A9H3 | P60438 | ldci_ecoli  | rl3_ecoli |
| P60438 | RL3_ECOLI | * P0A9M0 | P60438 | lon_ecoli   | rl3_ecoli |
| P60438 | RL3_ECOLI | * P0A722 | P60438 | lpxa_ecoli  | rl3_ecoli |
| P60438 | RL3_ECOLI | * P21645 | P60438 | lpxd_ecoli  | rl3_ecoli |
| P60438 | RL3_ECOLI | * P76114 | P60438 | mcbr_ecoli  | rl3_ecoli |
| P60438 | RL3_ECOLI | * P61889 | P60438 | mdh_ecoli   | rl3_ecoli |
| P60438 | RL3_ECOLI | * P25522 | P60438 | mnme_ecoli  | rl3_ecoli |
| P60438 | RL3_ECOLI | * P0A9X4 | P60438 | mreb_ecoli  | rl3_ecoli |
| P60438 | RL3_ECOLI | * P22523 | P60438 | mukb_ecoli  | rl3_ecoli |
| P60438 | RL3_ECOLI | * P77245 | P60438 | murr_ecoli  | rl3_ecoli |
| P60438 | RL3_ECOLI | * P68739 | P60438 | nfi_ecoli   | rl3_ecoli |
| P60438 | RL3_ECOLI | * P63020 | P60438 | nfua_ecoli  | rl3_ecoli |
| P60438 | RL3_ECOLI | * P0AFF6 | P60438 | nusa_ecoli  | rl3_ecoli |
| P60438 | RL3_ECOLI | * P0A780 | P60438 | nusb_ecoli  | rl3_ecoli |
| P60438 | RL3_ECOLI | * P76086 | P60438 | paax_ecoli  | rl3_ecoli |
| P60438 | RL3_ECOLI | * P0A9K3 | P60438 | phol_ecoli  | rl3_ecoli |
| P60438 | RL3_ECOLI | * P0A9K3 | P60438 | phol_ecoli  | rl3_ecoli |
| P60438 | RL3_ECOLI | * P00490 | P60438 | phsm_ecoli  | rl3_ecoli |
| P60438 | RL3_ECOLI | * P00490 | P60438 | phsm_ecoli  | rl3_ecoli |

|        |           |          |        |            |           |
|--------|-----------|----------|--------|------------|-----------|
| P60438 | RL3_ECOLI | * P0A7A7 | P60438 | plsb_ecoli | rl3_ecoli |
| P60438 | RL3_ECOLI | * P0A7A7 | P60438 | plsb_ecoli | rl3_ecoli |
| P60438 | RL3_ECOLI | * P23862 | P60438 | pric_ecoli | rl3_ecoli |
| P60438 | RL3_ECOLI | * P23830 | P60438 | pss_ecoli  | rl3_ecoli |
| P60438 | RL3_ECOLI | * P0A7E9 | P60438 | pyrh_ecoli | rl3_ecoli |
| P60438 | RL3_ECOLI | * P60240 | P60438 | rapa_ecoli | rl3_ecoli |
| P60438 | RL3_ECOLI | * P69405 | P60438 | rca_ecoli  | rl3_ecoli |
| P60438 | RL3_ECOLI | * P69407 | P60438 | rca_ecoli  | rl3_ecoli |
| P60438 | RL3_ECOLI | * P0A8J8 | P60438 | rca_ecoli  | rl3_ecoli |
| P60438 | RL3_ECOLI | * P0A8J8 | P60438 | rca_ecoli  | rl3_ecoli |
| P60438 | RL3_ECOLI | * P25888 | P60438 | rca_ecoli  | rl3_ecoli |
| P60438 | RL3_ECOLI | * P0AG30 | P60438 | rca_ecoli  | rl3_ecoli |
| P60438 | RL3_ECOLI | * P25539 | P60438 | rca_ecoli  | rl3_ecoli |
| P60438 | RL3_ECOLI | * P61714 | P60438 | rca_ecoli  | rl3_ecoli |
| P60438 | RL3_ECOLI | * P61714 | P60438 | rca_ecoli  | rl3_ecoli |
| P60438 | RL3_ECOLI | * P63177 | P60438 | rca_ecoli  | rl3_ecoli |
| P60438 | RL3_ECOLI | * P0C0R7 | P60438 | rca_ecoli  | rl3_ecoli |
| P60438 | RL3_ECOLI | * P75864 | P60438 | rca_ecoli  | rl3_ecoli |
| P60438 | RL3_ECOLI | * P36979 | P60438 | rca_ecoli  | rl3_ecoli |
| P60438 | RL3_ECOLI | * P36979 | P60438 | rca_ecoli  | rl3_ecoli |
| P60438 | RL3_ECOLI | * P36979 | P60438 | rca_ecoli  | rl3_ecoli |
| P60438 | RL3_ECOLI | * P37765 | P60438 | rca_ecoli  | rl3_ecoli |
| P60438 | RL3_ECOLI | * P37765 | P60438 | rca_ecoli  | rl3_ecoli |
| P60438 | RL3_ECOLI | * P0AA39 | P60438 | rca_ecoli  | rl3_ecoli |
| P60438 | RL3_ECOLI | * P0AA39 | P60438 | rca_ecoli  | rl3_ecoli |
| P60438 | RL3_ECOLI | * P21513 | P60438 | rca_ecoli  | rl3_ecoli |
| P60438 | RL3_ECOLI | * P21513 | P60438 | rca_ecoli  | rl3_ecoli |
| P60438 | RL3_ECOLI | * P0A7Y8 | P60438 | rca_ecoli  | rl3_ecoli |
| P60438 | RL3_ECOLI | * P0A7Y8 | P60438 | rca_ecoli  | rl3_ecoli |
| P60438 | RL3_ECOLI | * P21499 | P60438 | rca_ecoli  | rl3_ecoli |
| P60438 | RL3_ECOLI | * P21499 | P60438 | rca_ecoli  | rl3_ecoli |
| P60438 | RL3_ECOLI | * P0A7Z4 | P60438 | rca_ecoli  | rl3_ecoli |
| P60438 | RL3_ECOLI | * P0A8T7 | P60438 | rca_ecoli  | rl3_ecoli |
| P60438 | RL3_ECOLI | * P0A8T7 | P60438 | rca_ecoli  | rl3_ecoli |
| P60438 | RL3_ECOLI | * P0A776 | P60438 | rca_ecoli  | rl3_ecoli |
| P60438 | RL3_ECOLI | * P0A776 | P60438 | rca_ecoli  | rl3_ecoli |
| P60438 | RL3_ECOLI | * P0A776 | P60438 | rca_ecoli  | rl3_ecoli |
| P60438 | RL3_ECOLI | * P39286 | P60438 | rca_ecoli  | rl3_ecoli |
| P60438 | RL3_ECOLI | * P36929 | P60438 | rca_ecoli  | rl3_ecoli |
| P60438 | RL3_ECOLI | * P60390 | P60438 | rca_ecoli  | rl3_ecoli |
| P60438 | RL3_ECOLI | * P46850 | P60438 | rca_ecoli  | rl3_ecoli |
| P60438 | RL3_ECOLI | * P14081 | P60438 | rca_ecoli  | rl3_ecoli |
| P60438 | RL3_ECOLI | * P14081 | P60438 | rca_ecoli  | rl3_ecoli |
| P60438 | RL3_ECOLI | * P0A823 | P60438 | rca_ecoli  | rl3_ecoli |
| P60438 | RL3_ECOLI | * P0AG24 | P60438 | rca_ecoli  | rl3_ecoli |



|        |            |          |        |             |            |
|--------|------------|----------|--------|-------------|------------|
| P60438 | RL3_ECOLI  | * P0AG24 | P60438 | spot_ecoli  | r13_ecoli  |
| P60438 | RL3_ECOLI  | * P15082 | P60438 | srlr_ecoli  | r13_ecoli  |
| P60438 | RL3_ECOLI  | * P07813 | P60438 | syl_ecoli   | r13_ecoli  |
| P60438 | RL3_ECOLI  | * P0A8M3 | P60438 | syt_ecoli   | r13_ecoli  |
| P60438 | RL3_ECOLI  | * P00954 | P60438 | syw_ecoli   | r13_ecoli  |
| P60438 | RL3_ECOLI  | * P0A847 | P60438 | tgt_ecoli   | r13_ecoli  |
| P60438 | RL3_ECOLI  | * P0A850 | P60438 | tig_ecoli   | r13_ecoli  |
| P60438 | RL3_ECOLI  | * P0A850 | P60438 | tig_ecoli   | r13_ecoli  |
| P60438 | RL3_ECOLI  | * P0AGI8 | P60438 | trka_ecoli  | r13_ecoli  |
| P60438 | RL3_ECOLI  | * P0A8I5 | P60438 | trmb_ecoli  | r13_ecoli  |
| P60438 | RL3_ECOLI  | * P0A9W0 | P60438 | ular_ecoli  | r13_ecoli  |
| P60438 | RL3_ECOLI  | * P0A9W0 | P60438 | ular_ecoli  | r13_ecoli  |
| P60438 | RL3_ECOLI  | * P0A8G0 | P60438 | uvrc_ecoli  | r13_ecoli  |
| P60438 | RL3_ECOLI  | * P0A8G0 | P60438 | uvrc_ecoli  | r13_ecoli  |
| P60438 | RL3_ECOLI  | * P03018 | P60438 | uvrd_ecoli  | r13_ecoli  |
| P60438 | RL3_ECOLI  | * P0A8E5 | P60438 | yacl_ecoli  | r13_ecoli  |
| P60438 | RL3_ECOLI  | * P40711 | P60438 | yaej_ecoli  | r13_ecoli  |
| P60438 | RL3_ECOLI  | * P0AAS7 | P60438 | ybcj_ecoli  | r13_ecoli  |
| P60438 | RL3_ECOLI  | * P0AAS7 | P60438 | ybcj_ecoli  | r13_ecoli  |
| P60438 | RL3_ECOLI  | * P0A8Z3 | P60438 | ybgc_ecoli  | r13_ecoli  |
| P60438 | RL3_ECOLI  | * P75767 | P60438 | ybhk_ecoli  | r13_ecoli  |
| P60438 | RL3_ECOLI  | * P75829 | P60438 | ybjx_ecoli  | r13_ecoli  |
| P60438 | RL3_ECOLI  | * P75829 | P60438 | ybjx_ecoli  | r13_ecoli  |
| P60438 | RL3_ECOLI  | * P76104 | P60438 | ydcg_ecoli  | r13_ecoli  |
| P60438 | RL3_ECOLI  | * P33916 | P60438 | yejf_ecoli  | r13_ecoli  |
| P60438 | RL3_ECOLI  | * P39199 | P60438 | yfcb_ecoli  | r13_ecoli  |
| P60438 | RL3_ECOLI  | * P39199 | P60438 | yfcb_ecoli  | r13_ecoli  |
| P60438 | RL3_ECOLI  | * P0AGJ5 | P60438 | yfif_ecoli  | r13_ecoli  |
| P60438 | RL3_ECOLI  | * P0AGJ5 | P60438 | yfif_ecoli  | r13_ecoli  |
| P60438 | RL3_ECOLI  | * P76594 | P60438 | yfiq_ecoli  | r13_ecoli  |
| P60438 | RL3_ECOLI  | * P52126 | P60438 | yfjk_ecoli  | r13_ecoli  |
| P60438 | RL3_ECOLI  | * Q46906 | P60438 | ygcp_ecoli  | r13_ecoli  |
| P60438 | RL3_ECOLI  | * P0AGK4 | P60438 | yhby_ecoli  | r13_ecoli  |
| P60438 | RL3_ECOLI  | * P45550 | P60438 | yhfx_ecoli  | r13_ecoli  |
| P60438 | RL3_ECOLI  | * P37634 | P60438 | yhir_ecoli  | r13_ecoli  |
| P60438 | RL3_ECOLI  | * P0ADK8 | P60438 | yibl_ecoli  | r13_ecoli  |
| P60438 | RL3_ECOLI  | * P0A8H6 | P60438 | yihi_ecoli  | r13_ecoli  |
| P60438 | RL3_ECOLI  | * P0A8X0 | P60438 | yjga_ecoli  | r13_ecoli  |
| P60438 | RL3_ECOLI  | * P76148 | P60438 | yneg_ecoli  | r13_ecoli  |
| P0AG51 | RL30_ECOLI | none     |        |             |            |
| P0A7N4 | RL32_ECOLI | * P13669 | P0A7N4 | mng_r_ecoli | r132_ecoli |
| P0A7N4 | RL32_ECOLI | * P75616 | P0A7N4 | yaax_ecoli  | r132_ecoli |
| P0A7N4 | RL32_ECOLI | * P38521 | P0A7N4 | ygg_l_ecoli | r132_ecoli |



|        |            |          |        |            |            |
|--------|------------|----------|--------|------------|------------|
| POA7N4 | RL32_ECOLI | * P75994 | POA7N4 | ymgc_ecoli | rl32_ecoli |
| POA7N9 | RL33_ECOLI | * P0A9Q5 | POA7N9 | accd_ecoli | rl33_ecoli |
| POA7N9 | RL33_ECOLI | * P0AE18 | POA7N9 | ampm_ecoli | rl33_ecoli |
| POA7N9 | RL33_ECOLI | * P36659 | POA7N9 | cbpa_ecoli | rl33_ecoli |
| POA7N9 | RL33_ECOLI | * P0ABH9 | POA7N9 | clpa_ecoli | rl33_ecoli |
| POA7N9 | RL33_ECOLI | * P0A6G7 | POA7N9 | clpp_ecoli | rl33_ecoli |
| POA7N9 | RL33_ECOLI | * P0A6H1 | POA7N9 | clpx_ecoli | rl33_ecoli |
| POA7N9 | RL33_ECOLI | * P0A6Y8 | POA7N9 | dnak_ecoli | rl33_ecoli |
| POA7N9 | RL33_ECOLI | * P0A6R3 | POA7N9 | fis_ecoli  | rl33_ecoli |
| POA7N9 | RL33_ECOLI | * P09372 | POA7N9 | grpe_ecoli | rl33_ecoli |
| POA7N9 | RL33_ECOLI | * P69931 | POA7N9 | hda_ecoli  | rl33_ecoli |
| POA7N9 | RL33_ECOLI | * P28630 | POA7N9 | hola_ecoli | rl33_ecoli |
| POA7N9 | RL33_ECOLI | * P28905 | POA7N9 | holc_ecoli | rl33_ecoli |
| POA7N9 | RL33_ECOLI | * P0A6L9 | POA7N9 | hscb_ecoli | rl33_ecoli |
| POA7N9 | RL33_ECOLI | * P0A7B8 | POA7N9 | hslv_ecoli | rl33_ecoli |
| POA7N9 | RL33_ECOLI | * P0A6Z3 | POA7N9 | htpg_ecoli | rl33_ecoli |
| POA7N9 | RL33_ECOLI | * P0A6Y1 | POA7N9 | ihfb_ecoli | rl33_ecoli |
| POA7N9 | RL33_ECOLI | * P22939 | POA7N9 | ispa_ecoli | rl33_ecoli |
| POA7N9 | RL33_ECOLI | * P0A715 | POA7N9 | kdsa_ecoli | rl33_ecoli |
| POA7N9 | RL33_ECOLI | * P0AC75 | POA7N9 | kdaa_ecoli | rl33_ecoli |
| POA7N9 | RL33_ECOLI | * P0A722 | POA7N9 | lpxa_ecoli | rl33_ecoli |
| POA7N9 | RL33_ECOLI | * P21645 | POA7N9 | lpxd_ecoli | rl33_ecoli |
| POA7N9 | RL33_ECOLI | * P25522 | POA7N9 | mnme_ecoli | rl33_ecoli |
| POA7N9 | RL33_ECOLI | * P17443 | POA7N9 | murg_ecoli | rl33_ecoli |
| POA7N9 | RL33_ECOLI | * P0AFI2 | POA7N9 | parc_ecoli | rl33_ecoli |
| POA7N9 | RL33_ECOLI | * P0A9K3 | POA7N9 | phol_ecoli | rl33_ecoli |
| POA7N9 | RL33_ECOLI | * P0A7A7 | POA7N9 | plsb_ecoli | rl33_ecoli |
| POA7N9 | RL33_ECOLI | * P0A7D1 | POA7N9 | pth_ecoli  | rl33_ecoli |
| POA7N9 | RL33_ECOLI | * P0A7E9 | POA7N9 | pyrh_ecoli | rl33_ecoli |
| POA7N9 | RL33_ECOLI | * P69405 | POA7N9 | rca_e_coli | rl33_ecoli |
| POA7N9 | RL33_ECOLI | * P61714 | POA7N9 | risb_ecoli | rl33_ecoli |
| POA7N9 | RL33_ECOLI | * P63177 | POA7N9 | rlmb_ecoli | rl33_ecoli |
| POA7N9 | RL33_ECOLI | * P37351 | POA7N9 | rpib_ecoli | rl33_ecoli |
| POA7N9 | RL33_ECOLI | * P0A7Z4 | POA7N9 | rpoa_ecoli | rl33_ecoli |
| POA7N9 | RL33_ECOLI | * P0A8V2 | POA7N9 | rpob_ecoli | rl33_ecoli |
| POA7N9 | RL33_ECOLI | * P39286 | POA7N9 | rsga_ecoli | rl33_ecoli |
| POA7N9 | RL33_ECOLI | * P15082 | POA7N9 | srlr_ecoli | rl33_ecoli |
| POA7N9 | RL33_ECOLI | * P0AAS7 | POA7N9 | ybcj_ecoli | rl33_ecoli |
| POA7N9 | RL33_ECOLI | * P75829 | POA7N9 | ybjx_ecoli | rl33_ecoli |
| POA7N9 | RL33_ECOLI | * P76104 | POA7N9 | ydcg_ecoli | rl33_ecoli |
| POA7N9 | RL33_ECOLI | * Q46906 | POA7N9 | ygcp_ecoli | rl33_ecoli |
| POA7N9 | RL33_ECOLI | * P67701 | POA7N9 | ygjm_ecoli | rl33_ecoli |
| POA7N9 | RL33_ECOLI | * P0A9X1 | POA7N9 | znuc_ecoli | rl33_ecoli |

P0A7Q1 RL35\_ECOLI

none

|        |           |   |        |        |            |           |
|--------|-----------|---|--------|--------|------------|-----------|
| P60723 | RL4_ECOLI | * | P24224 | P60723 | acps_ecoli | rl4_ecoli |
| P60723 | RL4_ECOLI | * | P06720 | P60723 | agal_ecoli | rl4_ecoli |
| P60723 | RL4_ECOLI | * | P36548 | P60723 | amia_ecoli | rl4_ecoli |
| P60723 | RL4_ECOLI | * | P0AE18 | P60723 | ampm_ecoli | rl4_ecoli |
| P60723 | RL4_ECOLI | * | P05052 | P60723 | appy_ecoli | rl4_ecoli |
| P60723 | RL4_ECOLI | * | P36659 | P60723 | cbpa_ecoli | rl4_ecoli |
| P60723 | RL4_ECOLI | * | P36659 | P60723 | cbpa_ecoli | rl4_ecoli |
| P60723 | RL4_ECOLI | * | P07364 | P60723 | cher_ecoli | rl4_ecoli |
| P60723 | RL4_ECOLI | * | P0ABH9 | P60723 | clpa_ecoli | rl4_ecoli |
| P60723 | RL4_ECOLI | * | P0A6G7 | P60723 | clpp_ecoli | rl4_ecoli |
| P60723 | RL4_ECOLI | * | P0A6I6 | P60723 | coad_ecoli | rl4_ecoli |
| P60723 | RL4_ECOLI | * | P0A9X9 | P60723 | cspa_ecoli | rl4_ecoli |
| P60723 | RL4_ECOLI | * | P36995 | P60723 | cspb_ecoli | rl4_ecoli |
| P60723 | RL4_ECOLI | * | P0A9Y6 | P60723 | cspc_ecoli | rl4_ecoli |
| P60723 | RL4_ECOLI | * | P0A9Y6 | P60723 | cspc_ecoli | rl4_ecoli |
| P60723 | RL4_ECOLI | * | P0A972 | P60723 | cspe_ecoli | rl4_ecoli |
| P60723 | RL4_ECOLI | * | P0A972 | P60723 | cspe_ecoli | rl4_ecoli |
| P60723 | RL4_ECOLI | * | P0A978 | P60723 | cspg_ecoli | rl4_ecoli |
| P60723 | RL4_ECOLI | * | P0A986 | P60723 | cspi_ecoli | rl4_ecoli |
| P60723 | RL4_ECOLI | * | P0ABK5 | P60723 | cysk_ecoli | rl4_ecoli |
| P60723 | RL4_ECOLI | * | P11557 | P60723 | damx_ecoli | rl4_ecoli |
| P60723 | RL4_ECOLI | * | P0ACF0 | P60723 | dbha_ecoli | rl4_ecoli |
| P60723 | RL4_ECOLI | * | P37195 | P60723 | dctr_ecoli | rl4_ecoli |
| P60723 | RL4_ECOLI | * | P76316 | P60723 | dcyd_ecoli | rl4_ecoli |
| P60723 | RL4_ECOLI | * | P0A9P6 | P60723 | dead_ecoli | rl4_ecoli |
| P60723 | RL4_ECOLI | * | P0A6K3 | P60723 | def_ecoli  | rl4_ecoli |
| P60723 | RL4_ECOLI | * | P0A6P5 | P60723 | der_ecoli  | rl4_ecoli |
| P60723 | RL4_ECOLI | * | P0AEE8 | P60723 | dma_ecoli  | rl4_ecoli |
| P60723 | RL4_ECOLI | * | P03004 | P60723 | dnaa_ecoli | rl4_ecoli |
| P60723 | RL4_ECOLI | * | P0ACB0 | P60723 | dnab_ecoli | rl4_ecoli |
| P60723 | RL4_ECOLI | * | P0A6Y8 | P60723 | dnak_ecoli | rl4_ecoli |
| P60723 | RL4_ECOLI | * | P76540 | P60723 | eutk_ecoli | rl4_ecoli |
| P60723 | RL4_ECOLI | * | P76556 | P60723 | eutp_ecoli | rl4_ecoli |
| P60723 | RL4_ECOLI | * | P76555 | P60723 | eutq_ecoli | rl4_ecoli |
| P60723 | RL4_ECOLI | * | P63746 | P60723 | euts_ecoli | rl4_ecoli |
| P60723 | RL4_ECOLI | * | P0A6Q6 | P60723 | fabz_ecoli | rl4_ecoli |
| P60723 | RL4_ECOLI | * | P0A6R3 | P60723 | fis_ecoli  | rl4_ecoli |
| P60723 | RL4_ECOLI | * | P0ABZ1 | P60723 | flig_ecoli | rl4_ecoli |
| P60723 | RL4_ECOLI | * | P26608 | P60723 | flis_ecoli | rl4_ecoli |
| P60723 | RL4_ECOLI | * | P23882 | P60723 | fmt_ecoli  | rl4_ecoli |
| P60723 | RL4_ECOLI | * | P0AAI3 | P60723 | ftsh_ecoli | rl4_ecoli |
| P60723 | RL4_ECOLI | * | P68066 | P60723 | grca_ecoli | rl4_ecoli |
| P60723 | RL4_ECOLI | * | P0A6W5 | P60723 | grea_ecoli | rl4_ecoli |

|        |           |   |        |        |            |           |
|--------|-----------|---|--------|--------|------------|-----------|
| P60723 | RL4_ECOLI | * | P09372 | P60723 | grpe_ecoli | rl4_ecoli |
| P60723 | RL4_ECOLI | * | P15038 | P60723 | held_ecoli | rl4_ecoli |
| P60723 | RL4_ECOLI | * | P0A6X3 | P60723 | hfq_ecoli  | rl4_ecoli |
| P60723 | RL4_ECOLI | * | P0A6X3 | P60723 | hfq_ecoli  | rl4_ecoli |
| P60723 | RL4_ECOLI | * | P28905 | P60723 | holc_ecoli | rl4_ecoli |
| P60723 | RL4_ECOLI | * | P28905 | P60723 | holc_ecoli | rl4_ecoli |
| P60723 | RL4_ECOLI | * | P0ACG8 | P60723 | hslr_ecoli | rl4_ecoli |
| P60723 | RL4_ECOLI | * | P0A6H5 | P60723 | hslu_ecoli | rl4_ecoli |
| P60723 | RL4_ECOLI | * | P0A7B8 | P60723 | hslv_ecoli | rl4_ecoli |
| P60723 | RL4_ECOLI | * | P0A7B8 | P60723 | hslv_ecoli | rl4_ecoli |
| P60723 | RL4_ECOLI | * | P16528 | P60723 | iclr_ecoli | rl4_ecoli |
| P60723 | RL4_ECOLI | * | P0A6Y1 | P60723 | ihfb_ecoli | rl4_ecoli |
| P60723 | RL4_ECOLI | * | P24218 | P60723 | intd_ecoli | rl4_ecoli |
| P60723 | RL4_ECOLI | * | P0A7A9 | P60723 | ipyr_ecoli | rl4_ecoli |
| P60723 | RL4_ECOLI | * | P0A7A9 | P60723 | ipyr_ecoli | rl4_ecoli |
| P60723 | RL4_ECOLI | * | P0C0L9 | P60723 | iscx_ecoli | rl4_ecoli |
| P60723 | RL4_ECOLI | * | P62623 | P60723 | isph_ecoli | rl4_ecoli |
| P60723 | RL4_ECOLI | * | P0AB77 | P60723 | kbl_ecoli  | rl4_ecoli |
| P60723 | RL4_ECOLI | * | P0A715 | P60723 | kdsa_ecoli | rl4_ecoli |
| P60723 | RL4_ECOLI | * | P04951 | P60723 | kdsb_ecoli | rl4_ecoli |
| P60723 | RL4_ECOLI | * | P60785 | P60723 | lepa_ecoli | rl4_ecoli |
| P60723 | RL4_ECOLI | * | P21645 | P60723 | lpxd_ecoli | rl4_ecoli |
| P60723 | RL4_ECOLI | * | P21645 | P60723 | lpxd_ecoli | rl4_ecoli |
| P60723 | RL4_ECOLI | * | P21645 | P60723 | lpxd_ecoli | rl4_ecoli |
| P60723 | RL4_ECOLI | * | P43341 | P60723 | lpxh_ecoli | rl4_ecoli |
| P60723 | RL4_ECOLI | * | P0AEI1 | P60723 | miab_ecoli | rl4_ecoli |
| P60723 | RL4_ECOLI | * | P25522 | P60723 | mnme_ecoli | rl4_ecoli |
| P60723 | RL4_ECOLI | * | P0A9H1 | P60723 | mug_ecoli  | rl4_ecoli |
| P60723 | RL4_ECOLI | * | P22523 | P60723 | mukb_ecoli | rl4_ecoli |
| P60723 | RL4_ECOLI | * | P0A749 | P60723 | mura_ecoli | rl4_ecoli |
| P60723 | RL4_ECOLI | * | P77245 | P60723 | murr_ecoli | rl4_ecoli |
| P60723 | RL4_ECOLI | * | P68739 | P60723 | nfi_ecoli  | rl4_ecoli |
| P60723 | RL4_ECOLI | * | Q46877 | P60723 | norv_ecoli | rl4_ecoli |
| P60723 | RL4_ECOLI | * | P0AFD1 | P60723 | nuoe_ecoli | rl4_ecoli |
| P60723 | RL4_ECOLI | * | P0AFF6 | P60723 | nusa_ecoli | rl4_ecoli |
| P60723 | RL4_ECOLI | * | P0AFG0 | P60723 | nusg_ecoli | rl4_ecoli |
| P60723 | RL4_ECOLI | * | P33362 | P60723 | osmf_ecoli | rl4_ecoli |
| P60723 | RL4_ECOLI | * | P20083 | P60723 | pare_ecoli | rl4_ecoli |
| P60723 | RL4_ECOLI | * | P0A9K3 | P60723 | phol_ecoli | rl4_ecoli |
| P60723 | RL4_ECOLI | * | P0A9K3 | P60723 | phol_ecoli | rl4_ecoli |
| P60723 | RL4_ECOLI | * | P00490 | P60723 | phsm_ecoli | rl4_ecoli |
| P60723 | RL4_ECOLI | * | P0A7A7 | P60723 | plsb_ecoli | rl4_ecoli |
| P60723 | RL4_ECOLI | * | P05055 | P60723 | pnp_ecoli  | rl4_ecoli |
| P60723 | RL4_ECOLI | * | P05055 | P60723 | pnp_ecoli  | rl4_ecoli |
| P60723 | RL4_ECOLI | * | P0A9L5 | P60723 | ppic_ecoli | rl4_ecoli |

|        |           |          |        |            |           |
|--------|-----------|----------|--------|------------|-----------|
| P60723 | RL4_ECOLI | * P0A7D1 | P60723 | pth_ecoli  | rl4_ecoli |
| P60723 | RL4_ECOLI | * P0A7E9 | P60723 | pyrh_ecoli | rl4_ecoli |
| P60723 | RL4_ECOLI | * P02925 | P60723 | rbsb_ecoli | rl4_ecoli |
| P60723 | RL4_ECOLI | * P69405 | P60723 | rca_ecoli  | rl4_ecoli |
| P60723 | RL4_ECOLI | * P24230 | P60723 | recg_ecoli | rl4_ecoli |
| P60723 | RL4_ECOLI | * P21893 | P60723 | recj_ecoli | rl4_ecoli |
| P60723 | RL4_ECOLI | * P0AG20 | P60723 | rela_ecoli | rl4_ecoli |
| P60723 | RL4_ECOLI | * P09377 | P60723 | rhas_ecoli | rl4_ecoli |
| P60723 | RL4_ECOLI | * P25888 | P60723 | rhle_ecoli | rl4_ecoli |
| P60723 | RL4_ECOLI | * P0AG30 | P60723 | rho_ecoli  | rl4_ecoli |
| P60723 | RL4_ECOLI | * P25539 | P60723 | ribd_ecoli | rl4_ecoli |
| P60723 | RL4_ECOLI | * P0AG40 | P60723 | ribf_ecoli | rl4_ecoli |
| P60723 | RL4_ECOLI | * P33022 | P60723 | rihb_ecoli | rl4_ecoli |
| P60723 | RL4_ECOLI | * P61714 | P60723 | risb_ecoli | rl4_ecoli |
| P60723 | RL4_ECOLI | * P0C0R7 | P60723 | rlme_ecoli | rl4_ecoli |
| P60723 | RL4_ECOLI | * P0ADR6 | P60723 | rlmm_ecoli | rl4_ecoli |
| P60723 | RL4_ECOLI | * P36979 | P60723 | rlmn_ecoli | rl4_ecoli |
| P60723 | RL4_ECOLI | * P36979 | P60723 | rlmn_ecoli | rl4_ecoli |
| P60723 | RL4_ECOLI | * P37765 | P60723 | rlub_ecoli | rl4_ecoli |
| P60723 | RL4_ECOLI | * P37765 | P60723 | rlub_ecoli | rl4_ecoli |
| P60723 | RL4_ECOLI | * P0AA39 | P60723 | rluc_ecoli | rl4_ecoli |
| P60723 | RL4_ECOLI | * P0AA39 | P60723 | rluc_ecoli | rl4_ecoli |
| P60723 | RL4_ECOLI | * P21513 | P60723 | rne_ecoli  | rl4_ecoli |
| P60723 | RL4_ECOLI | * P21513 | P60723 | rne_ecoli  | rl4_ecoli |
| P60723 | RL4_ECOLI | * P0A7Y8 | P60723 | rnpa_ecoli | rl4_ecoli |
| P60723 | RL4_ECOLI | * P21499 | P60723 | rnrc_ecoli | rl4_ecoli |
| P60723 | RL4_ECOLI | * P21499 | P60723 | rnrc_ecoli | rl4_ecoli |
| P60723 | RL4_ECOLI | * P0A7Z4 | P60723 | rpoa_ecoli | rl4_ecoli |
| P60723 | RL4_ECOLI | * P0A7Z4 | P60723 | rpoa_ecoli | rl4_ecoli |
| P60723 | RL4_ECOLI | * P0A8V2 | P60723 | rpob_ecoli | rl4_ecoli |
| P60723 | RL4_ECOLI | * P0A8T7 | P60723 | rpoc_ecoli | rl4_ecoli |
| P60723 | RL4_ECOLI | * P00579 | P60723 | rpod_ecoli | rl4_ecoli |
| P60723 | RL4_ECOLI | * P00579 | P60723 | rpod_ecoli | rl4_ecoli |
| P60723 | RL4_ECOLI | * P00579 | P60723 | rpod_ecoli | rl4_ecoli |
| P60723 | RL4_ECOLI | * P0A776 | P60723 | rpph_ecoli | rl4_ecoli |
| P60723 | RL4_ECOLI | * P0A776 | P60723 | rpph_ecoli | rl4_ecoli |
| P60723 | RL4_ECOLI | * P39286 | P60723 | rsga_ecoli | rl4_ecoli |
| P60723 | RL4_ECOLI | * P36929 | P60723 | rsmb_ecoli | rl4_ecoli |
| P60723 | RL4_ECOLI | * P39406 | P60723 | rsmc_ecoli | rl4_ecoli |
| P60723 | RL4_ECOLI | * P07026 | P60723 | sdia_ecoli | rl4_ecoli |
| P60723 | RL4_ECOLI | * P10408 | P60723 | seca_ecoli | rl4_ecoli |
| P60723 | RL4_ECOLI | * P14081 | P60723 | selb_ecoli | rl4_ecoli |
| P60723 | RL4_ECOLI | * P0AG24 | P60723 | spot_ecoli | rl4_ecoli |
| P60723 | RL4_ECOLI | * P0AG24 | P60723 | spot_ecoli | rl4_ecoli |
| P60723 | RL4_ECOLI | * P15082 | P60723 | srlr_ecoli | rl4_ecoli |

|        |           |          |        |            |           |
|--------|-----------|----------|--------|------------|-----------|
| P60723 | RL4_ECOLI | * P21507 | P60723 | srmb_ecoli | rl4_ecoli |
| P60723 | RL4_ECOLI | * P21507 | P60723 | srmb_ecoli | rl4_ecoli |
| P60723 | RL4_ECOLI | * P0AFZ3 | P60723 | sspb_ecoli | rl4_ecoli |
| P60723 | RL4_ECOLI | * P0ADG4 | P60723 | suhb_ecoli | rl4_ecoli |
| P60723 | RL4_ECOLI | * P04805 | P60723 | syecoli    | rl4_ecoli |
| P60723 | RL4_ECOLI | * P00960 | P60723 | syga_ecoli | rl4_ecoli |
| P60723 | RL4_ECOLI | * P07813 | P60723 | syl_ecoli  | rl4_ecoli |
| P60723 | RL4_ECOLI | * P0A847 | P60723 | tgt_ecoli  | rl4_ecoli |
| P60723 | RL4_ECOLI | * P0A850 | P60723 | tig_ecoli  | rl4_ecoli |
| P60723 | RL4_ECOLI | * P0A850 | P60723 | tig_ecoli  | rl4_ecoli |
| P60723 | RL4_ECOLI | * P28904 | P60723 | trec_ecoli | rl4_ecoli |
| P60723 | RL4_ECOLI | * P0A8I5 | P60723 | trmb_ecoli | rl4_ecoli |
| P60723 | RL4_ECOLI | * P00895 | P60723 | trpe_ecoli | rl4_ecoli |
| P60723 | RL4_ECOLI | * P0AB18 | P60723 | tuse_ecoli | rl4_ecoli |
| P60723 | RL4_ECOLI | * P0A9W0 | P60723 | ular_ecoli | rl4_ecoli |
| P60723 | RL4_ECOLI | * P37903 | P60723 | uspf_ecoli | rl4_ecoli |
| P60723 | RL4_ECOLI | * P0A8G0 | P60723 | uvrc_ecoli | rl4_ecoli |
| P60723 | RL4_ECOLI | * Q46800 | P60723 | xdhb_ecoli | rl4_ecoli |
| P60723 | RL4_ECOLI | * P0A8E5 | P60723 | yacl_ecoli | rl4_ecoli |
| P60723 | RL4_ECOLI | * P40711 | P60723 | yaej_ecoli | rl4_ecoli |
| P60723 | RL4_ECOLI | * P0AFP2 | P60723 | ybaz_ecoli | rl4_ecoli |
| P60723 | RL4_ECOLI | * P0AAS7 | P60723 | ybcj_ecoli | rl4_ecoli |
| P60723 | RL4_ECOLI | * P0AAT6 | P60723 | ybeb_ecoli | rl4_ecoli |
| P60723 | RL4_ECOLI | * P75767 | P60723 | ybhk_ecoli | rl4_ecoli |
| P60723 | RL4_ECOLI | * P75829 | P60723 | ybjx_ecoli | rl4_ecoli |
| P60723 | RL4_ECOLI | * P75829 | P60723 | ybjx_ecoli | rl4_ecoli |
| P60723 | RL4_ECOLI | * P37052 | P60723 | ychj_ecoli | rl4_ecoli |
| P60723 | RL4_ECOLI | * P08245 | P60723 | ycih_ecoli | rl4_ecoli |
| P60723 | RL4_ECOLI | * P33218 | P60723 | yebe_ecoli | rl4_ecoli |
| P60723 | RL4_ECOLI | * P0ACY9 | P60723 | yebg_ecoli | rl4_ecoli |
| P60723 | RL4_ECOLI | * P0AD05 | P60723 | yeca_ecoli | rl4_ecoli |
| P60723 | RL4_ECOLI | * P76396 | P60723 | yegl_ecoli | rl4_ecoli |
| P60723 | RL4_ECOLI | * P77196 | P60723 | yfcu_ecoli | rl4_ecoli |
| P60723 | RL4_ECOLI | * P76515 | P60723 | yfds_ecoli | rl4_ecoli |
| P60723 | RL4_ECOLI | * P76538 | P60723 | yfez_ecoli | rl4_ecoli |
| P60723 | RL4_ECOLI | * P24178 | P60723 | yffb_ecoli | rl4_ecoli |
| P60723 | RL4_ECOLI | * P0AFU4 | P60723 | yfha_ecoli | rl4_ecoli |
| P60723 | RL4_ECOLI | * P52119 | P60723 | yfjf_ecoli | rl4_ecoli |
| P60723 | RL4_ECOLI | * P76632 | P60723 | ygck_ecoli | rl4_ecoli |
| P60723 | RL4_ECOLI | * Q46906 | P60723 | ygcp_ecoli | rl4_ecoli |
| P60723 | RL4_ECOLI | * Q46927 | P60723 | ygdI_ecoli | rl4_ecoli |
| P60723 | RL4_ECOLI | * P0ADT5 | P60723 | ygic_ecoli | rl4_ecoli |
| P60723 | RL4_ECOLI | * P42624 | P60723 | yhak_ecoli | rl4_ecoli |
| P60723 | RL4_ECOLI | * P45472 | P60723 | yhbq_ecoli | rl4_ecoli |
| P60723 | RL4_ECOLI | * P0AGK4 | P60723 | yhby_ecoli | rl4_ecoli |

|        |           |          |        |             |           |
|--------|-----------|----------|--------|-------------|-----------|
| P60723 | RL4_ECOLI | * P46854 | P60723 | yhhy_ecoli  | r14_ecoli |
| P60723 | RL4_ECOLI | * P37634 | P60723 | yhir_ecoli  | r14_ecoli |
| P60723 | RL4_ECOLI | * P0A8H6 | P60723 | yihi_ecoli  | r14_ecoli |
| P60723 | RL4_ECOLI | * P32162 | P60723 | yiis_ecoli  | r14_ecoli |
| P60723 | RL4_ECOLI | * P32694 | P60723 | yjbm_ecoli  | r14_ecoli |
| P60723 | RL4_ECOLI | * P32704 | P60723 | yjcf_ecoli  | r14_ecoli |
| P60723 | RL4_ECOLI | * P75992 | P60723 | ymga_ecoli  | r14_ecoli |
| P60723 | RL4_ECOLI | * P76148 | P60723 | yneg_ecoli  | r14_ecoli |
| P60723 | RL4_ECOLI | * P76280 | P60723 | yobb_ecoli  | r14_ecoli |
| P60723 | RL4_ECOLI | * P33368 | P60723 | yohf_ecoli  | r14_ecoli |
| P60723 | RL4_ECOLI | * P0A9X1 | P60723 | znuc_ecoli  | r14_ecoli |
| P60723 | RL4_ECOLI | * P0A9X1 | P60723 | znuc_ecoli  | r14_ecoli |
|        |           |          |        |             |           |
| P62399 | RL5_ECOLI | * P0ABB4 | P62399 | atpb_ecoli  | r15_ecoli |
| P62399 | RL5_ECOLI | * P06610 | P62399 | btue_ecoli  | r15_ecoli |
| P62399 | RL5_ECOLI | * P36659 | P62399 | cbpa_ecoli  | r15_ecoli |
| P62399 | RL5_ECOLI | * P0ABH9 | P62399 | clpa_ecoli  | r15_ecoli |
| P62399 | RL5_ECOLI | * P0A6G7 | P62399 | clpp_ecoli  | r15_ecoli |
| P62399 | RL5_ECOLI | * P0A9Y6 | P62399 | cspc_ecoli  | r15_ecoli |
| P62399 | RL5_ECOLI | * P0A9Y6 | P62399 | cspc_ecoli  | r15_ecoli |
| P62399 | RL5_ECOLI | * P76250 | P62399 | dmlr_ecoli  | r15_ecoli |
| P62399 | RL5_ECOLI | * P0A6Q6 | P62399 | fabz_ecoli  | r15_ecoli |
| P62399 | RL5_ECOLI | * P13024 | P62399 | fdhe_ecoli  | r15_ecoli |
| P62399 | RL5_ECOLI | * P23484 | P62399 | feci_ecoli  | r15_ecoli |
| P62399 | RL5_ECOLI | * P0A9A6 | P62399 | ftsz_ecoli  | r15_ecoli |
| P62399 | RL5_ECOLI | * P37147 | P62399 | fxsa_ecoli  | r15_ecoli |
| P62399 | RL5_ECOLI | * P0A6W5 | P62399 | grea_ecoli  | r15_ecoli |
| P62399 | RL5_ECOLI | * P0A6Z1 | P62399 | hsca_ecoli  | r15_ecoli |
| P62399 | RL5_ECOLI | * P0A6X7 | P62399 | ihfa_ecoli  | r15_ecoli |
| P62399 | RL5_ECOLI | * P0A6Y1 | P62399 | ihfb_ecoli  | r15_ecoli |
| P62399 | RL5_ECOLI | * P0A715 | P62399 | kdsa_ecoli  | r15_ecoli |
| P62399 | RL5_ECOLI | * P0AC75 | P62399 | kdt_a_ecoli | r15_ecoli |
| P62399 | RL5_ECOLI | * P0A9H3 | P62399 | ldci_ecoli  | r15_ecoli |
| P62399 | RL5_ECOLI | * P18196 | P62399 | minc_ecoli  | r15_ecoli |
| P62399 | RL5_ECOLI | * P0A734 | P62399 | mine_ecoli  | r15_ecoli |
| P62399 | RL5_ECOLI | * P0A9X4 | P62399 | mreb_ecoli  | r15_ecoli |
| P62399 | RL5_ECOLI | * P0AC65 | P62399 | nr_dh_ecoli | r15_ecoli |
| P62399 | RL5_ECOLI | * P0AFF6 | P62399 | nusa_ecoli  | r15_ecoli |
| P62399 | RL5_ECOLI | * P0AFG0 | P62399 | nusg_ecoli  | r15_ecoli |
| P62399 | RL5_ECOLI | * P42641 | P62399 | obg_ecoli   | r15_ecoli |
| P62399 | RL5_ECOLI | * P0A9K3 | P62399 | phol_ecoli  | r15_ecoli |
| P62399 | RL5_ECOLI | * P0A9K3 | P62399 | phol_ecoli  | r15_ecoli |
| P62399 | RL5_ECOLI | * P05055 | P62399 | pnp_ecoli   | r15_ecoli |
| P62399 | RL5_ECOLI | * P33025 | P62399 | psug_ecoli  | r15_ecoli |
| P62399 | RL5_ECOLI | * P69811 | P62399 | ptfah_ecoli | r15_ecoli |



|        |           |   |        |        |            |           |
|--------|-----------|---|--------|--------|------------|-----------|
| P62399 | RL5_ECOLI | * | P69791 | P62399 | ptqa_ecoli | r15_ecoli |
| P62399 | RL5_ECOLI | * | P0A7E9 | P62399 | pyrh_ecoli | r15_ecoli |
| P62399 | RL5_ECOLI | * | P69405 | P62399 | rca_ecoli  | r15_ecoli |
| P62399 | RL5_ECOLI | * | P69407 | P62399 | rca_ecoli  | r15_ecoli |
| P62399 | RL5_ECOLI | * | P09377 | P62399 | rca_ecoli  | r15_ecoli |
| P62399 | RL5_ECOLI | * | P25539 | P62399 | ribd_ecoli | r15_ecoli |
| P62399 | RL5_ECOLI | * | P36979 | P62399 | rlmn_ecoli | r15_ecoli |
| P62399 | RL5_ECOLI | * | P36979 | P62399 | rlmn_ecoli | r15_ecoli |
| P62399 | RL5_ECOLI | * | P37765 | P62399 | rlub_ecoli | r15_ecoli |
| P62399 | RL5_ECOLI | * | P0AA39 | P62399 | rluc_ecoli | r15_ecoli |
| P62399 | RL5_ECOLI | * | P0A7Z4 | P62399 | rpoa_ecoli | r15_ecoli |
| P62399 | RL5_ECOLI | * | P00579 | P62399 | rpod_ecoli | r15_ecoli |
| P62399 | RL5_ECOLI | * | P0A776 | P62399 | rpph_ecoli | r15_ecoli |
| P62399 | RL5_ECOLI | * | P0AEU7 | P62399 | skp_ecoli  | r15_ecoli |
| P62399 | RL5_ECOLI | * | P0A9K9 | P62399 | slyd_ecoli | r15_ecoli |
| P62399 | RL5_ECOLI | * | P15082 | P62399 | srlr_ecoli | r15_ecoli |
| P62399 | RL5_ECOLI | * | P0AFZ3 | P62399 | sspb_ecoli | r15_ecoli |
| P62399 | RL5_ECOLI | * | P0A850 | P62399 | tig_ecoli  | r15_ecoli |
| P62399 | RL5_ECOLI | * | P0A8I5 | P62399 | trmb_ecoli | r15_ecoli |
| P62399 | RL5_ECOLI | * | P37903 | P62399 | uspf_ecoli | r15_ecoli |
| P62399 | RL5_ECOLI | * | P75829 | P62399 | ybjx_ecoli | r15_ecoli |
| P62399 | RL5_ECOLI | * | P75829 | P62399 | ybjx_ecoli | r15_ecoli |
| P62399 | RL5_ECOLI | * | P0AB28 | P62399 | yced_ecoli | r15_ecoli |
| P62399 | RL5_ECOLI | * | P0AB43 | P62399 | ycgl_ecoli | r15_ecoli |
| P62399 | RL5_ECOLI | * | P76012 | P62399 | ycgy_ecoli | r15_ecoli |
| P62399 | RL5_ECOLI | * | P37052 | P62399 | ychn_ecoli | r15_ecoli |
| P62399 | RL5_ECOLI | * | P0ACX5 | P62399 | ydhz_ecoli | r15_ecoli |
| P62399 | RL5_ECOLI | * | P64479 | P62399 | ydiz_ecoli | r15_ecoli |
| P62399 | RL5_ECOLI | * | P77768 | P62399 | yfci_ecoli | r15_ecoli |
| P62399 | RL5_ECOLI | * | P77656 | P62399 | yfdk_ecoli | r15_ecoli |
| P62399 | RL5_ECOLI | * | P64616 | P62399 | yhco_ecoli | r15_ecoli |
| P62399 | RL5_ECOLI | * | P32694 | P62399 | yjbm_ecoli | r15_ecoli |
| P62399 | RL5_ECOLI | * | P75992 | P62399 | ymga_ecoli | r15_ecoli |
|        |           |   |        |        |            |           |
| P0AG55 | RL6_ECOLI | * | P24224 | P0AG55 | acps_ecoli | r16_ecoli |
| P0AG55 | RL6_ECOLI | * | P0ABB4 | P0AG55 | atpb_ecoli | r16_ecoli |
| P0AG55 | RL6_ECOLI | * | P33363 | P0AG55 | bglx_ecoli | r16_ecoli |
| P0AG55 | RL6_ECOLI | * | P36659 | P0AG55 | cbpa_ecoli | r16_ecoli |
| P0AG55 | RL6_ECOLI | * | P0A9P6 | P0AG55 | dead_ecoli | r16_ecoli |
| P0AG55 | RL6_ECOLI | * | P76250 | P0AG55 | dmlr_ecoli | r16_ecoli |
| P0AG55 | RL6_ECOLI | * | P0A6Y8 | P0AG55 | dnak_ecoli | r16_ecoli |
| P0AG55 | RL6_ECOLI | * | P0ADI4 | P0AG55 | entb_ecoli | r16_ecoli |
| P0AG55 | RL6_ECOLI | * | P65643 | P0AG55 | eutt_ecoli | r16_ecoli |
| P0AG55 | RL6_ECOLI | * | P0A6Q6 | P0AG55 | fabz_ecoli | r16_ecoli |
| P0AG55 | RL6_ECOLI | * | P13024 | P0AG55 | fdhe_ecoli | r16_ecoli |

|        |           |          |        |             |           |
|--------|-----------|----------|--------|-------------|-----------|
| P0AG55 | RL6_ECOLI | * P23484 | P0AG55 | feci_ecoli  | rl6_ecoli |
| P0AG55 | RL6_ECOLI | * P52614 | P0AG55 | flik_ecoli  | rl6_ecoli |
| P0AG55 | RL6_ECOLI | * P0AEN1 | P0AG55 | fre_ecoli   | rl6_ecoli |
| P0AG55 | RL6_ECOLI | * P63204 | P0AG55 | gade_ecoli  | rl6_ecoli |
| P0AG55 | RL6_ECOLI | * P09394 | P0AG55 | glpq_ecoli  | rl6_ecoli |
| P0AG55 | RL6_ECOLI | * P0A9C9 | P0AG55 | glpx_ecoli  | rl6_ecoli |
| P0AG55 | RL6_ECOLI | * P0A6Z1 | P0AG55 | hsca_ecoli  | rl6_ecoli |
| P0AG55 | RL6_ECOLI | * P77319 | P0AG55 | hscg_ecoli  | rl6_ecoli |
| P0AG55 | RL6_ECOLI | * P0A715 | P0AG55 | kdsa_ecoli  | rl6_ecoli |
| P0AG55 | RL6_ECOLI | * P0A722 | P0AG55 | lpxa_ecoli  | rl6_ecoli |
| P0AG55 | RL6_ECOLI | * P0A722 | P0AG55 | lpxa_ecoli  | rl6_ecoli |
| P0AG55 | RL6_ECOLI | * P0A734 | P0AG55 | mine_ecoli  | rl6_ecoli |
| P0AG55 | RL6_ECOLI | * P30748 | P0AG55 | moad_ecoli  | rl6_ecoli |
| P0AG55 | RL6_ECOLI | * P06722 | P0AG55 | muth_ecoli  | rl6_ecoli |
| P0AG55 | RL6_ECOLI | * P37128 | P0AG55 | nudk_ecoli  | rl6_ecoli |
| P0AG55 | RL6_ECOLI | * P0AFF6 | P0AG55 | nusa_ecoli  | rl6_ecoli |
| P0AG55 | RL6_ECOLI | * P0AFH8 | P0AG55 | osmy_ecoli  | rl6_ecoli |
| P0AG55 | RL6_ECOLI | * P0A9K3 | P0AG55 | phol_ecoli  | rl6_ecoli |
| P0AG55 | RL6_ECOLI | * P0A9K3 | P0AG55 | phol_ecoli  | rl6_ecoli |
| P0AG55 | RL6_ECOLI | * P23836 | P0AG55 | phop_ecoli  | rl6_ecoli |
| P0AG55 | RL6_ECOLI | * P0A7A7 | P0AG55 | plsb_ecoli  | rl6_ecoli |
| P0AG55 | RL6_ECOLI | * P05055 | P0AG55 | pnp_ecoli   | rl6_ecoli |
| P0AG55 | RL6_ECOLI | * P23862 | P0AG55 | pric_ecoli  | rl6_ecoli |
| P0AG55 | RL6_ECOLI | * P33025 | P0AG55 | psug_ecoli  | rl6_ecoli |
| P0AG55 | RL6_ECOLI | * P0A9M8 | P0AG55 | pta_ecoli   | rl6_ecoli |
| P0AG55 | RL6_ECOLI | * P69811 | P0AG55 | ptfah_ecoli | rl6_ecoli |
| P0AG55 | RL6_ECOLI | * P63177 | P0AG55 | rlmb_ecoli  | rl6_ecoli |
| P0AG55 | RL6_ECOLI | * P36979 | P0AG55 | rlmn_ecoli  | rl6_ecoli |
| P0AG55 | RL6_ECOLI | * P37765 | P0AG55 | rlub_ecoli  | rl6_ecoli |
| P0AG55 | RL6_ECOLI | * P0AA39 | P0AG55 | rluc_ecoli  | rl6_ecoli |
| P0AG55 | RL6_ECOLI | * P0AA39 | P0AG55 | rluc_ecoli  | rl6_ecoli |
| P0AG55 | RL6_ECOLI | * P0A7Y8 | P0AG55 | rnpa_ecoli  | rl6_ecoli |
| P0AG55 | RL6_ECOLI | * P21499 | P0AG55 | rnrc_ecoli  | rl6_ecoli |
| P0AG55 | RL6_ECOLI | * P0A8V0 | P0AG55 | rnz_ecoli   | rl6_ecoli |
| P0AG55 | RL6_ECOLI | * P0A7Z4 | P0AG55 | rpoa_ecoli  | rl6_ecoli |
| P0AG55 | RL6_ECOLI | * P0A776 | P0AG55 | rpph_ecoli  | rl6_ecoli |
| P0AG55 | RL6_ECOLI | * P0A776 | P0AG55 | rpph_ecoli  | rl6_ecoli |
| P0AG55 | RL6_ECOLI | * P0A9K9 | P0AG55 | slyd_ecoli  | rl6_ecoli |
| P0AG55 | RL6_ECOLI | * P0AFZ3 | P0AG55 | sspb_ecoli  | rl6_ecoli |
| P0AG55 | RL6_ECOLI | * P0A832 | P0AG55 | ssrp_ecoli  | rl6_ecoli |
| P0AG55 | RL6_ECOLI | * P0A832 | P0AG55 | ssrp_ecoli  | rl6_ecoli |
| P0AG55 | RL6_ECOLI | * P00960 | P0AG55 | syga_ecoli  | rl6_ecoli |
| P0AG55 | RL6_ECOLI | * P0A850 | P0AG55 | tig_ecoli   | rl6_ecoli |
| P0AG55 | RL6_ECOLI | * P0A850 | P0AG55 | tig_ecoli   | rl6_ecoli |
| P0AG55 | RL6_ECOLI | * P0A8I5 | P0AG55 | trmb_ecoli  | rl6_ecoli |

|        |           |   |        |        |            |           |
|--------|-----------|---|--------|--------|------------|-----------|
| P0AG55 | RL6_ECOLI | * | P00895 | P0AG55 | trpe_ecoli | rl6_ecoli |
| P0AG55 | RL6_ECOLI | * | P77414 | P0AG55 | wcaa_ecoli | rl6_ecoli |
| P0AG55 | RL6_ECOLI | * | P0AAS7 | P0AG55 | ybcj_ecoli | rl6_ecoli |
| P0AG55 | RL6_ECOLI | * | P75829 | P0AG55 | ybjx_ecoli | rl6_ecoli |
| P0AG55 | RL6_ECOLI | * | P75829 | P0AG55 | ybjx_ecoli | rl6_ecoli |
| P0AG55 | RL6_ECOLI | * | P0AB28 | P0AG55 | yced_ecoli | rl6_ecoli |
| P0AG55 | RL6_ECOLI | * | P0AB43 | P0AG55 | ycgl_ecoli | rl6_ecoli |
| P0AG55 | RL6_ECOLI | * | P75991 | P0AG55 | ycgz_ecoli | rl6_ecoli |
| P0AG55 | RL6_ECOLI | * | P76069 | P0AG55 | yday_ecoli | rl6_ecoli |
| P0AG55 | RL6_ECOLI | * | P0ACX5 | P0AG55 | ydhz_ecoli | rl6_ecoli |
| P0AG55 | RL6_ECOLI | * | P0ACY9 | P0AG55 | yebg_ecoli | rl6_ecoli |
| P0AG55 | RL6_ECOLI | * | P0AD05 | P0AG55 | yeca_ecoli | rl6_ecoli |
| P0AG55 | RL6_ECOLI | * | P45508 | P0AG55 | yfal_ecoli | rl6_ecoli |
| P0AG55 | RL6_ECOLI | * | P65556 | P0AG55 | yfcd_ecoli | rl6_ecoli |
| P0AG55 | RL6_ECOLI | * | P77768 | P0AG55 | yfci_ecoli | rl6_ecoli |
| P0AG55 | RL6_ECOLI | * | P76515 | P0AG55 | yfds_ecoli | rl6_ecoli |
| P0AG55 | RL6_ECOLI | * | P0AGJ5 | P0AG55 | yfif_ecoli | rl6_ecoli |
| P0AG55 | RL6_ECOLI | * | P52119 | P0AG55 | yfjf_ecoli | rl6_ecoli |
| P0AG55 | RL6_ECOLI | * | P52062 | P0AG55 | yggw_ecoli | rl6_ecoli |
| P0AG55 | RL6_ECOLI | * | P0A8H6 | P0AG55 | yihi_ecoli | rl6_ecoli |
| P0AG55 | RL6_ECOLI | * | P32162 | P0AG55 | yiis_ecoli | rl6_ecoli |
| P0AG55 | RL6_ECOLI | * | P75992 | P0AG55 | ymga_ecoli | rl6_ecoli |
| P0AG55 | RL6_ECOLI | * | P0AA57 | P0AG55 | yoba_ecoli | rl6_ecoli |
| P0AG55 | RL6_ECOLI | * | P76612 | P0AG55 | ypjb_ecoli | rl6_ecoli |
|        |           |   |        |        |            |           |
| P0A7K2 | RL7_ECOLI | * | P0AE18 | P0A7K2 | ampm_ecoli | rl7_ecoli |
| P0A7K2 | RL7_ECOLI | * | P36659 | P0A7K2 | cbpa_ecoli | rl7_ecoli |
| P0A7K2 | RL7_ECOLI | * | P0ABH9 | P0A7K2 | clpa_ecoli | rl7_ecoli |
| P0A7K2 | RL7_ECOLI | * | P0A6G7 | P0A7K2 | clpp_ecoli | rl7_ecoli |
| P0A7K2 | RL7_ECOLI | * | P0A6H1 | P0A7K2 | clpx_ecoli | rl7_ecoli |
| P0A7K2 | RL7_ECOLI | * | P0A6I6 | P0A7K2 | coad_ecoli | rl7_ecoli |
| P0A7K2 | RL7_ECOLI | * | P0ACJ8 | P0A7K2 | crp_ecoli  | rl7_ecoli |
| P0A7K2 | RL7_ECOLI | * | P0A9X9 | P0A7K2 | cspa_ecoli | rl7_ecoli |
| P0A7K2 | RL7_ECOLI | * | P36995 | P0A7K2 | cspb_ecoli | rl7_ecoli |
| P0A7K2 | RL7_ECOLI | * | P0A978 | P0A7K2 | cspg_ecoli | rl7_ecoli |
| P0A7K2 | RL7_ECOLI | * | P03004 | P0A7K2 | dnaa_ecoli | rl7_ecoli |
| P0A7K2 | RL7_ECOLI | * | P0ACB0 | P0A7K2 | dnab_ecoli | rl7_ecoli |
| P0A7K2 | RL7_ECOLI | * | P15042 | P0A7K2 | dnlj_ecoli | rl7_ecoli |
| P0A7K2 | RL7_ECOLI | * | P0ABH0 | P0A7K2 | ftsa_ecoli | rl7_ecoli |
| P0A7K2 | RL7_ECOLI | * | P0AAI3 | P0A7K2 | ftsh_ecoli | rl7_ecoli |
| P0A7K2 | RL7_ECOLI | * | P0AEN8 | P0A7K2 | fucm_ecoli | rl7_ecoli |
| P0A7K2 | RL7_ECOLI | * | P05852 | P0A7K2 | gcp_ecoli  | rl7_ecoli |
| P0A7K2 | RL7_ECOLI | * | P31120 | P0A7K2 | glmm_ecoli | rl7_ecoli |
| P0A7K2 | RL7_ECOLI | * | P09372 | P0A7K2 | grpe_ecoli | rl7_ecoli |
| P0A7K2 | RL7_ECOLI | * | P69931 | P0A7K2 | hda_ecoli  | rl7_ecoli |

|        |           |          |        |            |           |
|--------|-----------|----------|--------|------------|-----------|
| P0A7K2 | RL7_ECOLI | * P15038 | P0A7K2 | held_ecoli | rl7_ecoli |
| P0A7K2 | RL7_ECOLI | * P0A6X3 | P0A7K2 | hfq_ecoli  | rl7_ecoli |
| P0A7K2 | RL7_ECOLI | * P28630 | P0A7K2 | hola_ecoli | rl7_ecoli |
| P0A7K2 | RL7_ECOLI | * P28905 | P0A7K2 | holc_ecoli | rl7_ecoli |
| P0A7K2 | RL7_ECOLI | * P28632 | P0A7K2 | hold_ecoli | rl7_ecoli |
| P0A7K2 | RL7_ECOLI | * P0ABS8 | P0A7K2 | hole_ecoli | rl7_ecoli |
| P0A7K2 | RL7_ECOLI | * P37024 | P0A7K2 | hrpb_ecoli | rl7_ecoli |
| P0A7K2 | RL7_ECOLI | * P0A6Z1 | P0A7K2 | hsca_ecoli | rl7_ecoli |
| P0A7K2 | RL7_ECOLI | * P0A6L9 | P0A7K2 | hscb_ecoli | rl7_ecoli |
| P0A7K2 | RL7_ECOLI | * P0A6H5 | P0A7K2 | hslu_ecoli | rl7_ecoli |
| P0A7K2 | RL7_ECOLI | * P0A7B8 | P0A7K2 | hslv_ecoli | rl7_ecoli |
| P0A7K2 | RL7_ECOLI | * P08142 | P0A7K2 | ilvb_ecoli | rl7_ecoli |
| P0A7K2 | RL7_ECOLI | * P22939 | P0A7K2 | ispa_ecoli | rl7_ecoli |
| P0A7K2 | RL7_ECOLI | * P62623 | P0A7K2 | isph_ecoli | rl7_ecoli |
| P0A7K2 | RL7_ECOLI | * P0AB74 | P0A7K2 | kbay_ecoli | rl7_ecoli |
| P0A7K2 | RL7_ECOLI | * P0A715 | P0A7K2 | kdsa_ecoli | rl7_ecoli |
| P0A7K2 | RL7_ECOLI | * P04951 | P0A7K2 | kdsb_ecoli | rl7_ecoli |
| P0A7K2 | RL7_ECOLI | * P0AC75 | P0A7K2 | kdta_ecoli | rl7_ecoli |
| P0A7K2 | RL7_ECOLI | * P0A720 | P0A7K2 | kthy_ecoli | rl7_ecoli |
| P0A7K2 | RL7_ECOLI | * P61316 | P0A7K2 | lola_ecoli | rl7_ecoli |
| P0A7K2 | RL7_ECOLI | * P0A722 | P0A7K2 | lpxa_ecoli | rl7_ecoli |
| P0A7K2 | RL7_ECOLI | * P21645 | P0A7K2 | lpxd_ecoli | rl7_ecoli |
| P0A7K2 | RL7_ECOLI | * P0ACE0 | P0A7K2 | mbhm_ecoli | rl7_ecoli |
| P0A7K2 | RL7_ECOLI | * P63386 | P0A7K2 | mlaf_ecoli | rl7_ecoli |
| P0A7K2 | RL7_ECOLI | * P30748 | P0A7K2 | moad_ecoli | rl7_ecoli |
| P0A7K2 | RL7_ECOLI | * P22523 | P0A7K2 | mukb_ecoli | rl7_ecoli |
| P0A7K2 | RL7_ECOLI | * P0A749 | P0A7K2 | mura_ecoli | rl7_ecoli |
| P0A7K2 | RL7_ECOLI | * P17952 | P0A7K2 | murc_ecoli | rl7_ecoli |
| P0A7K2 | RL7_ECOLI | * P17443 | P0A7K2 | murg_ecoli | rl7_ecoli |
| P0A7K2 | RL7_ECOLI | * P22634 | P0A7K2 | muri_ecoli | rl7_ecoli |
| P0A7K2 | RL7_ECOLI | * P0AF26 | P0A7K2 | narj_ecoli | rl7_ecoli |
| P0A7K2 | RL7_ECOLI | * P68739 | P0A7K2 | nfj_ecoli  | rl7_ecoli |
| P0A7K2 | RL7_ECOLI | * P0A6Z6 | P0A7K2 | nikr_ecoli | rl7_ecoli |
| P0A7K2 | RL7_ECOLI | * P0A8D0 | P0A7K2 | nrdr_ecoli | rl7_ecoli |
| P0A7K2 | RL7_ECOLI | * P0AFG0 | P0A7K2 | nusg_ecoli | rl7_ecoli |
| P0A7K2 | RL7_ECOLI | * P42641 | P0A7K2 | obg_ecoli  | rl7_ecoli |
| P0A7K2 | RL7_ECOLI | * P0AFI2 | P0A7K2 | parc_ecoli | rl7_ecoli |
| P0A7K2 | RL7_ECOLI | * P0A9K3 | P0A7K2 | phol_ecoli | rl7_ecoli |
| P0A7K2 | RL7_ECOLI | * P0A7A7 | P0A7K2 | plsb_ecoli | rl7_ecoli |
| P0A7K2 | RL7_ECOLI | * P0A9L5 | P0A7K2 | ppic_ecoli | rl7_ecoli |
| P0A7K2 | RL7_ECOLI | * P0ABS5 | P0A7K2 | prim_ecoli | rl7_ecoli |
| P0A7K2 | RL7_ECOLI | * P23830 | P0A7K2 | pss_ecoli  | rl7_ecoli |
| P0A7K2 | RL7_ECOLI | * P0A7D1 | P0A7K2 | pth_ecoli  | rl7_ecoli |
| P0A7K2 | RL7_ECOLI | * P0A7E9 | P0A7K2 | pyrh_ecoli | rl7_ecoli |
| P0A7K2 | RL7_ECOLI | * P77756 | P0A7K2 | quec_ecoli | rl7_ecoli |

|        |           |          |        |            |           |
|--------|-----------|----------|--------|------------|-----------|
| P0A7K2 | RL7_ECOLI | * P0AAZ4 | P0A7K2 | rara_ecoli | rl7_ecoli |
| P0A7K2 | RL7_ECOLI | * P31473 | P0A7K2 | rava_ecoli | rl7_ecoli |
| P0A7K2 | RL7_ECOLI | * P0AG30 | P0A7K2 | rho_ecoli  | rl7_ecoli |
| P0A7K2 | RL7_ECOLI | * P36979 | P0A7K2 | rlmn_ecoli | rl7_ecoli |
| P0A7K2 | RL7_ECOLI | * P0AA39 | P0A7K2 | rluc_ecoli | rl7_ecoli |
| P0A7K2 | RL7_ECOLI | * P21513 | P0A7K2 | rne_ecoli  | rl7_ecoli |
| P0A7K2 | RL7_ECOLI | * P0A7Y8 | P0A7K2 | rnpa_ecoli | rl7_ecoli |
| P0A7K2 | RL7_ECOLI | * P37351 | P0A7K2 | rpib_ecoli | rl7_ecoli |
| P0A7K2 | RL7_ECOLI | * P0A7Z4 | P0A7K2 | rpoa_ecoli | rl7_ecoli |
| P0A7K2 | RL7_ECOLI | * P0A8V2 | P0A7K2 | rpob_ecoli | rl7_ecoli |
| P0A7K2 | RL7_ECOLI | * P00579 | P0A7K2 | rpod_ecoli | rl7_ecoli |
| P0A7K2 | RL7_ECOLI | * P0A800 | P0A7K2 | rpoz_ecoli | rl7_ecoli |
| P0A7K2 | RL7_ECOLI | * P39286 | P0A7K2 | rsga_ecoli | rl7_ecoli |
| P0A7K2 | RL7_ECOLI | * P60390 | P0A7K2 | rsmh_ecoli | rl7_ecoli |
| P0A7K2 | RL7_ECOLI | * P0A8I1 | P0A7K2 | ruvx_ecoli | rl7_ecoli |
| P0A7K2 | RL7_ECOLI | * P10408 | P0A7K2 | seca_ecoli | rl7_ecoli |
| P0A7K2 | RL7_ECOLI | * P14081 | P0A7K2 | selb_ecoli | rl7_ecoli |
| P0A7K2 | RL7_ECOLI | * P0AG24 | P0A7K2 | spot_ecoli | rl7_ecoli |
| P0A7K2 | RL7_ECOLI | * P21507 | P0A7K2 | srmb_ecoli | rl7_ecoli |
| P0A7K2 | RL7_ECOLI | * P0ABZ6 | P0A7K2 | sura_ecoli | rl7_ecoli |
| P0A7K2 | RL7_ECOLI | * P07813 | P0A7K2 | syl_ecoli  | rl7_ecoli |
| P0A7K2 | RL7_ECOLI | * P0A847 | P0A7K2 | tgt_ecoli  | rl7_ecoli |
| P0A7K2 | RL7_ECOLI | * P0A850 | P0A7K2 | tig_ecoli  | rl7_ecoli |
| P0A7K2 | RL7_ECOLI | * P23003 | P0A7K2 | trma_ecoli | rl7_ecoli |
| P0A7K2 | RL7_ECOLI | * P0A890 | P0A7K2 | tusa_ecoli | rl7_ecoli |
| P0A7K2 | RL7_ECOLI | * P0A9W0 | P0A7K2 | ular_ecoli | rl7_ecoli |
| P0A7K2 | RL7_ECOLI | * P08390 | P0A7K2 | usg_ecoli  | rl7_ecoli |
| P0A7K2 | RL7_ECOLI | * P39177 | P0A7K2 | uspg_ecoli | rl7_ecoli |
| P0A7K2 | RL7_ECOLI | * P03018 | P0A7K2 | uvrd_ecoli | rl7_ecoli |
| P0A7K2 | RL7_ECOLI | * P0AED5 | P0A7K2 | uvry_ecoli | rl7_ecoli |
| P0A7K2 | RL7_ECOLI | * P0AAR3 | P0A7K2 | ybak_ecoli | rl7_ecoli |
| P0A7K2 | RL7_ECOLI | * P0AFP2 | P0A7K2 | ybaz_ecoli | rl7_ecoli |
| P0A7K2 | RL7_ECOLI | * P0AAS7 | P0A7K2 | ybcj_ecoli | rl7_ecoli |
| P0A7K2 | RL7_ECOLI | * P0AAT6 | P0A7K2 | ybeb_ecoli | rl7_ecoli |
| P0A7K2 | RL7_ECOLI | * P75829 | P0A7K2 | ybjx_ecoli | rl7_ecoli |
| P0A7K2 | RL7_ECOLI | * P75874 | P0A7K2 | yccu_ecoli | rl7_ecoli |
| P0A7K2 | RL7_ECOLI | * P24188 | P0A7K2 | ycea_ecoli | rl7_ecoli |
| P0A7K2 | RL7_ECOLI | * P75990 | P0A7K2 | ycgf_ecoli | rl7_ecoli |
| P0A7K2 | RL7_ECOLI | * P76104 | P0A7K2 | ydcp_ecoli | rl7_ecoli |
| P0A7K2 | RL7_ECOLI | * P77704 | P0A7K2 | ydji_ecoli | rl7_ecoli |
| P0A7K2 | RL7_ECOLI | * P76483 | P0A7K2 | yfbm_ecoli | rl7_ecoli |
| P0A7K2 | RL7_ECOLI | * P76578 | P0A7K2 | yfhm_ecoli | rl7_ecoli |
| P0A7K2 | RL7_ECOLI | * P52126 | P0A7K2 | yfjk_ecoli | rl7_ecoli |
| P0A7K2 | RL7_ECOLI | * P0ADQ2 | P0A7K2 | yiid_ecoli | rl7_ecoli |
| P0A7K2 | RL7_ECOLI | * P0AF67 | P0A7K2 | yjee_ecoli | rl7_ecoli |

|        |           |          |        |            |           |
|--------|-----------|----------|--------|------------|-----------|
| P0A7K2 | RL7_ECOLI | * P0A9X1 | P0A7K2 | znuc_ecoli | rl7_ecoli |
| P0A7R1 | RL9_ECOLI | * P0AE18 | P0A7R1 | ampm_ecoli | rl9_ecoli |
| P0A7R1 | RL9_ECOLI | * P0ABB0 | P0A7R1 | atpa_ecoli | rl9_ecoli |
| P0A7R1 | RL9_ECOLI | * P36659 | P0A7R1 | cbpa_ecoli | rl9_ecoli |
| P0A7R1 | RL9_ECOLI | * P0ABH9 | P0A7R1 | clpa_ecoli | rl9_ecoli |
| P0A7R1 | RL9_ECOLI | * P0A9Y6 | P0A7R1 | cspc_ecoli | rl9_ecoli |
| P0A7R1 | RL9_ECOLI | * P0ACF4 | P0A7R1 | dbhb_ecoli | rl9_ecoli |
| P0A7R1 | RL9_ECOLI | * P0A9P6 | P0A7R1 | dead_ecoli | rl9_ecoli |
| P0A7R1 | RL9_ECOLI | * P0A9P6 | P0A7R1 | dead_ecoli | rl9_ecoli |
| P0A7R1 | RL9_ECOLI | * P0A6Y8 | P0A7R1 | dnak_ecoli | rl9_ecoli |
| P0A7R1 | RL9_ECOLI | * P0A6P9 | P0A7R1 | eno_ecoli  | rl9_ecoli |
| P0A7R1 | RL9_ECOLI | * P0A6Q6 | P0A7R1 | fabz_ecoli | rl9_ecoli |
| P0A7R1 | RL9_ECOLI | * P23882 | P0A7R1 | fmt_ecoli  | rl9_ecoli |
| P0A7R1 | RL9_ECOLI | * P0A6X3 | P0A7R1 | hfq_ecoli  | rl9_ecoli |
| P0A7R1 | RL9_ECOLI | * P43329 | P0A7R1 | hrpa_ecoli | rl9_ecoli |
| P0A7R1 | RL9_ECOLI | * P0ACG8 | P0A7R1 | hslr_ecoli | rl9_ecoli |
| P0A7R1 | RL9_ECOLI | * P0A7B8 | P0A7R1 | hslv_ecoli | rl9_ecoli |
| P0A7R1 | RL9_ECOLI | * P32053 | P0A7R1 | inta_ecoli | rl9_ecoli |
| P0A7R1 | RL9_ECOLI | * P0A7A9 | P0A7R1 | ipyr_ecoli | rl9_ecoli |
| P0A7R1 | RL9_ECOLI | * P0A715 | P0A7R1 | kdsa_ecoli | rl9_ecoli |
| P0A7R1 | RL9_ECOLI | * P60785 | P0A7R1 | lepa_ecoli | rl9_ecoli |
| P0A7R1 | RL9_ECOLI | * P0A9M0 | P0A7R1 | lon_ecoli  | rl9_ecoli |
| P0A7R1 | RL9_ECOLI | * P0A9M0 | P0A7R1 | lon_ecoli  | rl9_ecoli |
| P0A7R1 | RL9_ECOLI | * P21645 | P0A7R1 | lpxd_ecoli | rl9_ecoli |
| P0A7R1 | RL9_ECOLI | * P21645 | P0A7R1 | lpxd_ecoli | rl9_ecoli |
| P0A7R1 | RL9_ECOLI | * P22523 | P0A7R1 | mukb_ecoli | rl9_ecoli |
| P0A7R1 | RL9_ECOLI | * P0A799 | P0A7R1 | pgk_ecoli  | rl9_ecoli |
| P0A7R1 | RL9_ECOLI | * P0A9K3 | P0A7R1 | phol_ecoli | rl9_ecoli |
| P0A7R1 | RL9_ECOLI | * P0A9K3 | P0A7R1 | phol_ecoli | rl9_ecoli |
| P0A7R1 | RL9_ECOLI | * P00914 | P0A7R1 | phr_ecoli  | rl9_ecoli |
| P0A7R1 | RL9_ECOLI | * P00490 | P0A7R1 | phsm_ecoli | rl9_ecoli |
| P0A7R1 | RL9_ECOLI | * P0A7A7 | P0A7R1 | plsb_ecoli | rl9_ecoli |
| P0A7R1 | RL9_ECOLI | * P05055 | P0A7R1 | pnp_ecoli  | rl9_ecoli |
| P0A7R1 | RL9_ECOLI | * P05055 | P0A7R1 | pnp_ecoli  | rl9_ecoli |
| P0A7R1 | RL9_ECOLI | * P0A7E9 | P0A7R1 | pyrh_ecoli | rl9_ecoli |
| P0A7R1 | RL9_ECOLI | * P69407 | P0A7R1 | rscb_ecoli | rl9_ecoli |
| P0A7R1 | RL9_ECOLI | * P0A8J8 | P0A7R1 | rhlb_ecoli | rl9_ecoli |
| P0A7R1 | RL9_ECOLI | * P63177 | P0A7R1 | rlmb_ecoli | rl9_ecoli |
| P0A7R1 | RL9_ECOLI | * P36979 | P0A7R1 | rlmn_ecoli | rl9_ecoli |
| P0A7R1 | RL9_ECOLI | * P36979 | P0A7R1 | rlmn_ecoli | rl9_ecoli |
| P0A7R1 | RL9_ECOLI | * P37765 | P0A7R1 | rlub_ecoli | rl9_ecoli |
| P0A7R1 | RL9_ECOLI | * P37765 | P0A7R1 | rlub_ecoli | rl9_ecoli |
| P0A7R1 | RL9_ECOLI | * P0AA39 | P0A7R1 | rluc_ecoli | rl9_ecoli |
| P0A7R1 | RL9_ECOLI | * P0AA39 | P0A7R1 | rluc_ecoli | rl9_ecoli |



|        |            |   |        |        |             |            |
|--------|------------|---|--------|--------|-------------|------------|
| P0A7R1 | RL9_ECOLI  | * | P21513 | P0A7R1 | rne_ecoli   | r19_ecoli  |
| P0A7R1 | RL9_ECOLI  | * | P21513 | P0A7R1 | rne_ecoli   | r19_ecoli  |
| P0A7R1 | RL9_ECOLI  | * | P0A7Y8 | P0A7R1 | rnpa_ecoli  | r19_ecoli  |
| P0A7R1 | RL9_ECOLI  | * | P21499 | P0A7R1 | rnrc_ecoli  | r19_ecoli  |
| P0A7R1 | RL9_ECOLI  | * | P21499 | P0A7R1 | rnrc_ecoli  | r19_ecoli  |
| P0A7R1 | RL9_ECOLI  | * | P0A8T7 | P0A7R1 | rpoc_ecoli  | r19_ecoli  |
| P0A7R1 | RL9_ECOLI  | * | P0A776 | P0A7R1 | rppe_ecoli  | r19_ecoli  |
| P0A7R1 | RL9_ECOLI  | * | P0A776 | P0A7R1 | rppe_ecoli  | r19_ecoli  |
| P0A7R1 | RL9_ECOLI  | * | P14081 | P0A7R1 | selb_ecoli  | r19_ecoli  |
| P0A7R1 | RL9_ECOLI  | * | P0AEU7 | P0A7R1 | skp_ecoli   | r19_ecoli  |
| P0A7R1 | RL9_ECOLI  | * | P0AG24 | P0A7R1 | spot_ecoli  | r19_ecoli  |
| P0A7R1 | RL9_ECOLI  | * | P0ACA3 | P0A7R1 | sspa_ecoli  | r19_ecoli  |
| P0A7R1 | RL9_ECOLI  | * | P0A8M3 | P0A7R1 | syt_ecoli   | r19_ecoli  |
| P0A7R1 | RL9_ECOLI  | * | P0A847 | P0A7R1 | tgt_ecoli   | r19_ecoli  |
| P0A7R1 | RL9_ECOLI  | * | P0A847 | P0A7R1 | tgt_ecoli   | r19_ecoli  |
| P0A7R1 | RL9_ECOLI  | * | P0A8I5 | P0A7R1 | trmb_ecoli  | r19_ecoli  |
| P0A7R1 | RL9_ECOLI  | * | P0A8G0 | P0A7R1 | uvrc_ecoli  | r19_ecoli  |
| P0A7R1 | RL9_ECOLI  | * | P0AAS7 | P0A7R1 | ybcj_ecoli  | r19_ecoli  |
| P0A7R1 | RL9_ECOLI  | * | P0AAS7 | P0A7R1 | ybcj_ecoli  | r19_ecoli  |
| P0A7R1 | RL9_ECOLI  | * | P75829 | P0A7R1 | ybjx_ecoli  | r19_ecoli  |
| P0A7R1 | RL9_ECOLI  | * | P76104 | P0A7R1 | ydcj_ecoli  | r19_ecoli  |
| P0A7R1 | RL9_ECOLI  | * | P0AGJ5 | P0A7R1 | yfif_ecoli  | r19_ecoli  |
| P0A7R1 | RL9_ECOLI  | * | P37631 | P0A7R1 | yhinc_ecoli | r19_ecoli  |
| P75876 | RLMI_ECOLI |   | none   |        |             |            |
| P75864 | RLML_ECOLI | * | P0ABE7 | P75864 | c562_ecolx  | rlml_ecoli |
| P75864 | RLML_ECOLI | * | P21179 | P75864 | cate_ecoli  | rlml_ecoli |
| P75864 | RLML_ECOLI | * | P0A9X9 | P75864 | cspa_ecoli  | rlml_ecoli |
| P75864 | RLML_ECOLI | * | P0A9Y6 | P75864 | cspc_ecoli  | rlml_ecoli |
| P75864 | RLML_ECOLI | * | P0A968 | P75864 | cspd_ecoli  | rlml_ecoli |
| P75864 | RLML_ECOLI | * | P0A972 | P75864 | cspe_ecoli  | rlml_ecoli |
| P75864 | RLML_ECOLI | * | P0A9P6 | P75864 | dead_ecoli  | rlml_ecoli |
| P75864 | RLML_ECOLI | * | P0AEK4 | P75864 | fabj_ecoli  | rlml_ecoli |
| P75864 | RLML_ECOLI | * | P0A6X3 | P75864 | hfq_ecoli   | rlml_ecoli |
| P75864 | RLML_ECOLI | * | P21645 | P75864 | lpxd_ecoli  | rlml_ecoli |
| P75864 | RLML_ECOLI | * | P00946 | P75864 | mana_ecoli  | rlml_ecoli |
| P75864 | RLML_ECOLI | * | P0A9K3 | P75864 | phol_ecoli  | rlml_ecoli |
| P75864 | RLML_ECOLI | * | P23830 | P75864 | pss_ecoli   | rlml_ecoli |
| P75864 | RLML_ECOLI | * | P36979 | P75864 | rlmn_ecoli  | rlml_ecoli |
| P75864 | RLML_ECOLI | * | P37765 | P75864 | rlub_ecoli  | rlml_ecoli |
| P75864 | RLML_ECOLI | * | P0AA39 | P75864 | rluc_ecoli  | rlml_ecoli |
| P75864 | RLML_ECOLI | * | P0AA39 | P75864 | rluc_ecoli  | rlml_ecoli |
| P75864 | RLML_ECOLI | * | P21513 | P75864 | rne_ecoli   | rlml_ecoli |
| P75864 | RLML_ECOLI | * | P0A7Y8 | P75864 | rnpa_ecoli  | rlml_ecoli |

|        |            |   |        |        |            |            |
|--------|------------|---|--------|--------|------------|------------|
| P75864 | RLML_ECOLI | * | P21499 | P75864 | rnr_ecoli  | rlml_ecoli |
| P75864 | RLML_ECOLI | * | P0A776 | P75864 | rpph_ecoli | rlml_ecoli |
| P75864 | RLML_ECOLI | * | P21507 | P75864 | srmb_ecoli | rlml_ecoli |
| P75864 | RLML_ECOLI | * | P0A847 | P75864 | tgt_ecoli  | rlml_ecoli |
| P75864 | RLML_ECOLI | * | P0A8I5 | P75864 | trmb_ecoli | rlml_ecoli |
| P75864 | RLML_ECOLI | * | P0AAS7 | P75864 | ybcj_ecoli | rlml_ecoli |
| P75864 | RLML_ECOLI | * | P0ACY9 | P75864 | yebg_ecoli | rlml_ecoli |
| P75864 | RLML_ECOLI | * | P0AGJ5 | P75864 | yfif_ecoli | rlml_ecoli |
| P75864 | RLML_ECOLI | * | P30871 | P75864 | ygif_ecoli | rlml_ecoli |
| P75864 | RLML_ECOLI | * | P0A8H6 | P75864 | yihi_ecoli | rlml_ecoli |
| P0ADR6 | RLMM_ECOLI | * | P76318 | P0ADR6 | yedk_ecoli | rlmm_ecoli |
| P36979 | RLMN_ECOLI | * | P0A858 | P36979 | tpis_ecoli | rlmn_ecoli |
| P10100 | RLPA_ECOLI |   | none   |        |            |            |
| P37765 | RLUB_ECOLI | * | P17445 | P37765 | betb_ecoli | rlub_ecoli |
| P37765 | RLUB_ECOLI | * | P31469 | P37765 | cbrc_ecoli | rlub_ecoli |
| P37765 | RLUB_ECOLI | * | P0A9X9 | P37765 | cspa_ecoli | rlub_ecoli |
| P37765 | RLUB_ECOLI | * | P0A9Y6 | P37765 | cspc_ecoli | rlub_ecoli |
| P37765 | RLUB_ECOLI | * | P0A968 | P37765 | cspd_ecoli | rlub_ecoli |
| P37765 | RLUB_ECOLI | * | P0A972 | P37765 | cspe_ecoli | rlub_ecoli |
| P37765 | RLUB_ECOLI | * | P0ACF0 | P37765 | dbha_ecoli | rlub_ecoli |
| P37765 | RLUB_ECOLI | * | P0A9P6 | P37765 | dead_ecoli | rlub_ecoli |
| P37765 | RLUB_ECOLI | * | P0A9P6 | P37765 | dead_ecoli | rlub_ecoli |
| P37765 | RLUB_ECOLI | * | P0A6X3 | P37765 | hfq_ecoli  | rlub_ecoli |
| P37765 | RLUB_ECOLI | * | P0A7B8 | P37765 | hslv_ecoli | rlub_ecoli |
| P37765 | RLUB_ECOLI | * | P21645 | P37765 | lpxd_ecoli | rlub_ecoli |
| P37765 | RLUB_ECOLI | * | P32173 | P37765 | moba_ecoli | rlub_ecoli |
| P37765 | RLUB_ECOLI | * | P0A9K3 | P37765 | phol_ecoli | rlub_ecoli |
| P37765 | RLUB_ECOLI | * | P0A7A7 | P37765 | plsb_ecoli | rlub_ecoli |
| P37765 | RLUB_ECOLI | * | P05055 | P37765 | pnp_ecoli  | rlub_ecoli |
| P37765 | RLUB_ECOLI | * | P42184 | P37765 | prsa_ecolx | rlub_ecoli |
| P37765 | RLUB_ECOLI | * | P36979 | P37765 | rlmn_ecoli | rlub_ecoli |
| P37765 | RLUB_ECOLI | * | P36979 | P37765 | rlmn_ecoli | rlub_ecoli |
| P37765 | RLUB_ECOLI | * | P0AA39 | P37765 | rluc_ecoli | rlub_ecoli |
| P37765 | RLUB_ECOLI | * | P0AA39 | P37765 | rluc_ecoli | rlub_ecoli |
| P37765 | RLUB_ECOLI | * | P21513 | P37765 | rne_ecoli  | rlub_ecoli |
| P37765 | RLUB_ECOLI | * | P0A7Y8 | P37765 | rnpa_ecoli | rlub_ecoli |
| P37765 | RLUB_ECOLI | * | P0A776 | P37765 | rpph_ecoli | rlub_ecoli |
| P37765 | RLUB_ECOLI | * | P14081 | P37765 | selb_ecoli | rlub_ecoli |
| P37765 | RLUB_ECOLI | * | P0AG24 | P37765 | spot_ecoli | rlub_ecoli |
| P37765 | RLUB_ECOLI | * | P21507 | P37765 | srmb_ecoli | rlub_ecoli |
| P37765 | RLUB_ECOLI | * | P0A847 | P37765 | tgt_ecoli  | rlub_ecoli |

|        |             |          |        |                             |                             |
|--------|-------------|----------|--------|-----------------------------|-----------------------------|
| P37765 | RLUB_ECOLI  | * P06612 | P37765 | <a href="#">top1_ecoli</a>  | <a href="#">rlub_ecoli</a>  |
| P37765 | RLUB_ECOLI  | * P0AAS7 | P37765 | <a href="#">ybcj_ecoli</a>  | <a href="#">rlub_ecoli</a>  |
| P37765 | RLUB_ECOLI  | * P0AAS7 | P37765 | <a href="#">ybcj_ecoli</a>  | <a href="#">rlub_ecoli</a>  |
| P37765 | RLUB_ECOLI  | * P75829 | P37765 | <a href="#">ybjx_ecoli</a>  | <a href="#">rlub_ecoli</a>  |
| P37765 | RLUB_ECOLI  | * P0AGJ5 | P37765 | <a href="#">yfif_ecoli</a>  | <a href="#">rlub_ecoli</a>  |
| P37765 | RLUB_ECOLI  | * P0AGK4 | P37765 | <a href="#">yhby_ecoli</a>  | <a href="#">rlub_ecoli</a>  |
| P0AA39 | RLUC_ECOLI  | * P0A9X9 | P0AA39 | <a href="#">cspa_ecoli</a>  | <a href="#">rluc_ecoli</a>  |
| P0AA39 | RLUC_ECOLI  | * P0A9Y6 | P0AA39 | <a href="#">cspc_ecoli</a>  | <a href="#">rluc_ecoli</a>  |
| P0AA39 | RLUC_ECOLI  | * P0A968 | P0AA39 | <a href="#">cspd_ecoli</a>  | <a href="#">rluc_ecoli</a>  |
| P0AA39 | RLUC_ECOLI  | * P32716 | P0AA39 | <a href="#">mdtn_ecoli</a>  | <a href="#">rluc_ecoli</a>  |
| P0AA39 | RLUC_ECOLI  | * P75794 | P0AA39 | <a href="#">pfle_ecoli</a>  | <a href="#">rluc_ecoli</a>  |
| P0AA39 | RLUC_ECOLI  | * P21499 | P0AA39 | <a href="#">rnr_ecoli</a>   | <a href="#">rluc_ecoli</a>  |
| P0AA39 | RLUC_ECOLI  | * P0A776 | P0AA39 | <a href="#">rpph_ecoli</a>  | <a href="#">rluc_ecoli</a>  |
| P0AA39 | RLUC_ECOLI  | * P37903 | P0AA39 | <a href="#">uspf_ecoli</a>  | <a href="#">rluc_ecoli</a>  |
| P0AA39 | RLUC_ECOLI  | * P0AAS7 | P0AA39 | <a href="#">ybcj_ecoli</a>  | <a href="#">rluc_ecoli</a>  |
| P0AA39 | RLUC_ECOLI  | * P0AGJ5 | P0AA39 | <a href="#">yfif_ecoli</a>  | <a href="#">rluc_ecoli</a>  |
| P0AA39 | RLUC_ECOLI  | * P0AGK4 | P0AA39 | <a href="#">yhby_ecoli</a>  | <a href="#">rluc_ecoli</a>  |
| P0AFW2 | RMF_ECOLI   | none     |        |                             |                             |
| P37744 | RMLA1_ECOLI | * P0ABBO | P37744 | <a href="#">atpa_ecoli</a>  | <a href="#">rmla1_ecoli</a> |
| P37744 | RMLA1_ECOLI | * P36561 | P37744 | <a href="#">cobs_ecoli</a>  | <a href="#">rmla1_ecoli</a> |
| P37744 | RMLA1_ECOLI | * P37760 | P37744 | <a href="#">rml_d_ecoli</a> | <a href="#">rmla1_ecoli</a> |
| P55253 | RMLA3_ECOLX | none     |        |                             |                             |
| P37759 | RMLB1_ECOLI | * P0A6H1 | P37759 | <a href="#">clpx_ecoli</a>  | <a href="#">rmlb1_ecoli</a> |
| P27830 | RMLB2_ECOLI | none     |        |                             |                             |
| P37745 | RMLC_ECOLI  | none     |        |                             |                             |
| P30850 | RNB_ECOLI   | * P10151 | P30850 | <a href="#">leuo_ecoli</a>  | <a href="#">rnb_ecoli</a>   |
| P30850 | RNB_ECOLI   | * P0A7Y0 | P30850 | <a href="#">rnc_ecoli</a>   | <a href="#">rnb_ecoli</a>   |
| P30850 | RNB_ECOLI   | * P77286 | P30850 | <a href="#">ydeu_ecoli</a>  | <a href="#">rnb_ecoli</a>   |
| P09155 | RND_ECOLI   | none     |        |                             |                             |
| P21513 | RNE_ECOLI   | * P0A6Y8 | P21513 | <a href="#">dnak_ecoli</a>  | <a href="#">rne_ecoli</a>   |
| P21513 | RNE_ECOLI   | * P0A6P9 | P21513 | <a href="#">eno_ecoli</a>   | <a href="#">rne_ecoli</a>   |
| P21513 | RNE_ECOLI   | * P0A6P9 | P21513 | <a href="#">eno_ecoli</a>   | <a href="#">rne_ecoli</a>   |
| P21513 | RNE_ECOLI   | * P0A6P9 | P21513 | <a href="#">eno_ecoli</a>   | <a href="#">rne_ecoli</a>   |
| P21513 | RNE_ECOLI   | * P0A6P9 | P21513 | <a href="#">eno_ecoli</a>   | <a href="#">rne_ecoli</a>   |
| P21513 | RNE_ECOLI   | * P0A6X3 | P21513 | <a href="#">hfq_ecoli</a>   | <a href="#">rne_ecoli</a>   |

|        |           |          |        |            |           |
|--------|-----------|----------|--------|------------|-----------|
| P21513 | RNE_ECOLI | * A8A6G7 | P21513 | oxaa_ecohs | rne_ecoli |
| P21513 | RNE_ECOLI | * P0A799 | P21513 | pgk_ecoli  | rne_ecoli |
| P21513 | RNE_ECOLI | * P05055 | P21513 | pnp_ecoli  | rne_ecoli |
| P21513 | RNE_ECOLI | * P05055 | P21513 | pnp_ecoli  | rne_ecoli |
| P21513 | RNE_ECOLI | * P05055 | P21513 | pnp_ecoli  | rne_ecoli |
| P21513 | RNE_ECOLI | * P15639 | P21513 | pur9_ecoli | rne_ecoli |
| P21513 | RNE_ECOLI | * P0A8J8 | P21513 | rhlb_ecoli | rne_ecoli |
| P21513 | RNE_ECOLI | * P0A8J8 | P21513 | rhlb_ecoli | rne_ecoli |
| P21513 | RNE_ECOLI | * P0A8J8 | P21513 | rhlb_ecoli | rne_ecoli |
| P21513 | RNE_ECOLI | * P0A8J8 | P21513 | rhlb_ecoli | rne_ecoli |
| P21513 | RNE_ECOLI | * P0A8J8 | P21513 | rhlb_ecoli | rne_ecoli |
| P21513 | RNE_ECOLI | * P36979 | P21513 | rlmn_ecoli | rne_ecoli |
| P21513 | RNE_ECOLI | * P04968 | P21513 | thd1_ecoli | rne_ecoli |
| P21513 | RNE_ECOLI | * P23003 | P21513 | trma_ecoli | rne_ecoli |
| P21513 | RNE_ECOLI | * P0AAS7 | P21513 | ybcj_ecoli | rne_ecoli |
| P21513 | RNE_ECOLI | * P0AD05 | P21513 | yeca_ecoli | rne_ecoli |
|        |           |          |        |            |           |
| P0A9J0 | RNG_ECOLI | * P0A6X3 | P0A9J0 | hfq_ecoli  | rng_ecoli |
| P0A9J0 | RNG_ECOLI | * P0A707 | P0A9J0 | if3_ecoli  | rng_ecoli |
| P0A9J0 | RNG_ECOLI | * P77286 | P0A9J0 | ydeu_ecoli | rng_ecoli |
|        |           |          |        |            |           |
| P21338 | RNI_ECOLI | * P0AEH5 | P21338 | elab_ecoli | rni_ecoli |
|        |           |          |        |            |           |
| P21499 | RNR_ECOLI | * P0A9Y6 | P21499 | cspc_ecoli | rnr_ecoli |
| P21499 | RNR_ECOLI | * P0A968 | P21499 | cspd_ecoli | rnr_ecoli |
| P21499 | RNR_ECOLI | * P0A972 | P21499 | cspe_ecoli | rnr_ecoli |
| P21499 | RNR_ECOLI | * P0A9P6 | P21499 | dead_ecoli | rnr_ecoli |
| P21499 | RNR_ECOLI | * P0A9P6 | P21499 | dead_ecoli | rnr_ecoli |
| P21499 | RNR_ECOLI | * P0A6X3 | P21499 | hfq_ecoli  | rnr_ecoli |
| P21499 | RNR_ECOLI | * P0A6X3 | P21499 | hfq_ecoli  | rnr_ecoli |
| P21499 | RNR_ECOLI | * P0A9K3 | P21499 | phol_ecoli | rnr_ecoli |
| P21499 | RNR_ECOLI | * P60723 | P21499 | rl4_ecoli  | rnr_ecoli |
| P21499 | RNR_ECOLI | * P36979 | P21499 | rlmn_ecoli | rnr_ecoli |
| P21499 | RNR_ECOLI | * P36979 | P21499 | rlmn_ecoli | rnr_ecoli |
| P21499 | RNR_ECOLI | * P37765 | P21499 | rlub_ecoli | rnr_ecoli |
| P21499 | RNR_ECOLI | * P37765 | P21499 | rlub_ecoli | rnr_ecoli |
| P21499 | RNR_ECOLI | * P0AA39 | P21499 | rluc_ecoli | rnr_ecoli |
| P21499 | RNR_ECOLI | * P0AA39 | P21499 | rluc_ecoli | rnr_ecoli |
| P21499 | RNR_ECOLI | * P21513 | P21499 | rne_ecoli  | rnr_ecoli |
| P21499 | RNR_ECOLI | * P0A776 | P21499 | rpph_ecoli | rnr_ecoli |
| P21499 | RNR_ECOLI | * P14081 | P21499 | selb_ecoli | rnr_ecoli |
| P21499 | RNR_ECOLI | * P0AEU7 | P21499 | skp_ecoli  | rnr_ecoli |
| P21499 | RNR_ECOLI | * P0AAS7 | P21499 | ybcj_ecoli | rnr_ecoli |
| P21499 | RNR_ECOLI | * P0AAS7 | P21499 | ybcj_ecoli | rnr_ecoli |
| P21499 | RNR_ECOLI | * P75829 | P21499 | ybjx_ecoli | rnr_ecoli |

|        |            |          |        |             |            |
|--------|------------|----------|--------|-------------|------------|
| P21499 | RNR_ECOLI  | * P0AGJ5 | P21499 | yfif_ecoli  | rnr_ecoli  |
| P0ACIO | ROB_ECOLI  | * P10805 | P0ACIO | envy_ecoli  | rob_ecoli  |
| P0ACIO | ROB_ECOLI  | * P0A6X3 | P0ACIO | hfq_ecoli   | rob_ecoli  |
| P0ACIO | ROB_ECOLI  | * P06612 | P0ACIO | top1_ecoli  | rob_ecoli  |
| P0ACIO | ROB_ECOLI  | * P77721 | P0ACIO | ydjf_ecoli  | rob_ecoli  |
| P0ACIO | ROB_ECOLI  | * P76464 | P0ACIO | yfas_ecoli  | rob_ecoli  |
| P0ACIO | ROB_ECOLI  | * P76513 | P0ACIO | yfdq_ecoli  | rob_ecoli  |
| P0A7Z0 | RPIA_ECOLI | none     |        |             |            |
| P0A7Z4 | RPOA_ECOLI | * P0AE60 | P0A7Z4 | ceda_ecoli  | rpoa_ecoli |
| P0A7Z4 | RPOA_ECOLI | * P0AE60 | P0A7Z4 | ceda_ecoli  | rpoa_ecoli |
| P0A7Z4 | RPOA_ECOLI | * P0ABQ0 | P0A7Z4 | coabc_ecoli | rpoa_ecoli |
| P0A7Z4 | RPOA_ECOLI | * P0A9X9 | P0A7Z4 | cspa_ecoli  | rpoa_ecoli |
| P0A7Z4 | RPOA_ECOLI | * P0ACF0 | P0A7Z4 | dbha_ecoli  | rpoa_ecoli |
| P0A7Z4 | RPOA_ECOLI | * P0ACF4 | P0A7Z4 | dbhb_ecoli  | rpoa_ecoli |
| P0A7Z4 | RPOA_ECOLI | * P00582 | P0A7Z4 | dpo1_ecoli  | rpoa_ecoli |
| P0A7Z4 | RPOA_ECOLI | * P00582 | P0A7Z4 | dpo1_ecoli  | rpoa_ecoli |
| P0A7Z4 | RPOA_ECOLI | * P0AC73 | P0A7Z4 | ebgc_ecoli  | rpoa_ecoli |
| P0A7Z4 | RPOA_ECOLI | * P23484 | P0A7Z4 | feci_ecoli  | rpoa_ecoli |
| P0A7Z4 | RPOA_ECOLI | * P0AEM6 | P0A7Z4 | flia_ecoli  | rpoa_ecoli |
| P0A7Z4 | RPOA_ECOLI | * P0A9B2 | P0A7Z4 | g3p1_ecoli  | rpoa_ecoli |
| P0A7Z4 | RPOA_ECOLI | * P05852 | P0A7Z4 | gcp_ecoli   | rpoa_ecoli |
| P0A7Z4 | RPOA_ECOLI | * P0A6W5 | P0A7Z4 | grea_ecoli  | rpoa_ecoli |
| P0A7Z4 | RPOA_ECOLI | * P30128 | P0A7Z4 | greb_ecoli  | rpoa_ecoli |
| P0A7Z4 | RPOA_ECOLI | * P0A6X3 | P0A7Z4 | hfq_ecoli   | rpoa_ecoli |
| P0A7Z4 | RPOA_ECOLI | * P68739 | P0A7Z4 | nfi_ecoli   | rpoa_ecoli |
| P0A7Z4 | RPOA_ECOLI | * P0AFF6 | P0A7Z4 | nusa_ecoli  | rpoa_ecoli |
| P0A7Z4 | RPOA_ECOLI | * P0AFF6 | P0A7Z4 | nusa_ecoli  | rpoa_ecoli |
| P0A7Z4 | RPOA_ECOLI | * P0AFG0 | P0A7Z4 | nusg_ecoli  | rpoa_ecoli |
| P0A7Z4 | RPOA_ECOLI | * P0AFG0 | P0A7Z4 | nusg_ecoli  | rpoa_ecoli |
| P0A7Z4 | RPOA_ECOLI | * P0AFG0 | P0A7Z4 | nusg_ecoli  | rpoa_ecoli |
| P0A7Z4 | RPOA_ECOLI | * P42641 | P0A7Z4 | obg_ecoli   | rpoa_ecoli |
| P0A7Z4 | RPOA_ECOLI | * P05055 | P0A7Z4 | pnf_ecoli   | rpoa_ecoli |
| P0A7Z4 | RPOA_ECOLI | * P60240 | P0A7Z4 | rapa_ecoli  | rpoa_ecoli |
| P0A7Z4 | RPOA_ECOLI | * P69407 | P0A7Z4 | rscb_ecoli  | rpoa_ecoli |
| P0A7Z4 | RPOA_ECOLI | * P07012 | P0A7Z4 | rf2_ecoli   | rpoa_ecoli |
| P0A7Z4 | RPOA_ECOLI | * P0AGB3 | P0A7Z4 | rp32_ecoli  | rpoa_ecoli |
| P0A7Z4 | RPOA_ECOLI | * P0AGB3 | P0A7Z4 | rp32_ecoli  | rpoa_ecoli |
| P0A7Z4 | RPOA_ECOLI | * P24255 | P0A7Z4 | rp54_ecoli  | rpoa_ecoli |
| P0A7Z4 | RPOA_ECOLI | * P24255 | P0A7Z4 | rp54_ecoli  | rpoa_ecoli |
| P0A7Z4 | RPOA_ECOLI | * P24255 | P0A7Z4 | rp54_ecoli  | rpoa_ecoli |
| P0A7Z4 | RPOA_ECOLI | * P0A8V2 | P0A7Z4 | rpob_ecoli  | rpoa_ecoli |
| P0A7Z4 | RPOA_ECOLI | * P0A8V2 | P0A7Z4 | rpob_ecoli  | rpoa_ecoli |

|        |            |   |        |        |                             |                            |
|--------|------------|---|--------|--------|-----------------------------|----------------------------|
| P0A7Z4 | RPOA_ECOLI | * | P0A8T7 | P0A7Z4 | <a href="#">rpoc_ecoli</a>  | <a href="#">rpoa_ecoli</a> |
| P0A7Z4 | RPOA_ECOLI | * | P0A8T7 | P0A7Z4 | <a href="#">rpoc_ecoli</a>  | <a href="#">rpoa_ecoli</a> |
| P0A7Z4 | RPOA_ECOLI | * | P0A8T7 | P0A7Z4 | <a href="#">rpoc_ecoli</a>  | <a href="#">rpoa_ecoli</a> |
| P0A7Z4 | RPOA_ECOLI | * | P0A8T7 | P0A7Z4 | <a href="#">rpoc_ecoli</a>  | <a href="#">rpoa_ecoli</a> |
| P0A7Z4 | RPOA_ECOLI | * | P0A8T7 | P0A7Z4 | <a href="#">rpoc_ecoli</a>  | <a href="#">rpoa_ecoli</a> |
| P0A7Z4 | RPOA_ECOLI | * | P00579 | P0A7Z4 | <a href="#">rpod_ecoli</a>  | <a href="#">rpoa_ecoli</a> |
| P0A7Z4 | RPOA_ECOLI | * | P00579 | P0A7Z4 | <a href="#">rpod_ecoli</a>  | <a href="#">rpoa_ecoli</a> |
| P0A7Z4 | RPOA_ECOLI | * | P13445 | P0A7Z4 | <a href="#">rpos_ecoli</a>  | <a href="#">rpoa_ecoli</a> |
| P0A7Z4 | RPOA_ECOLI | * | P0A800 | P0A7Z4 | <a href="#">rpoz_ecoli</a>  | <a href="#">rpoa_ecoli</a> |
| P0A7Z4 | RPOA_ECOLI | * | P28043 | P0A7Z4 | <a href="#">ssb2_ecolx</a>  | <a href="#">rpoa_ecoli</a> |
| P0A7Z4 | RPOA_ECOLI | * | P0ACA3 | P0A7Z4 | <a href="#">sspa_ecoli</a>  | <a href="#">rpoa_ecoli</a> |
| P0A7Z4 | RPOA_ECOLI | * | P06612 | P0A7Z4 | <a href="#">top1_ecoli</a>  | <a href="#">rpoa_ecoli</a> |
| P0A7Z4 | RPOA_ECOLI | * | P0A858 | P0A7Z4 | <a href="#">tpis_ecoli</a>  | <a href="#">rpoa_ecoli</a> |
| P0A7Z4 | RPOA_ECOLI | * | P08390 | P0A7Z4 | <a href="#">usg_ecoli</a>   | <a href="#">rpoa_ecoli</a> |
| P0A7Z4 | RPOA_ECOLI | * | P0A8E5 | P0A7Z4 | <a href="#">yacl_ecoli</a>  | <a href="#">rpoa_ecoli</a> |
| P0A7Z4 | RPOA_ECOLI | * | P0A8E5 | P0A7Z4 | <a href="#">yacl_ecoli</a>  | <a href="#">rpoa_ecoli</a> |
| P0A7Z4 | RPOA_ECOLI | * | P0AAS7 | P0A7Z4 | <a href="#">ybcj_ecoli</a>  | <a href="#">rpoa_ecoli</a> |
| P0A7Z4 | RPOA_ECOLI | * | P36928 | P0A7Z4 | <a href="#">yegd_ecoli</a>  | <a href="#">rpoa_ecoli</a> |
| P0A7Z4 | RPOA_ECOLI | * | Q46906 | P0A7Z4 | <a href="#">ygcp_ecoli</a>  | <a href="#">rpoa_ecoli</a> |
|        |            |   |        |        |                             |                            |
| P0A8V2 | RPOB_ECOLI | * | P31441 | P0A8V2 | <a href="#">adec_ecoli</a>  | <a href="#">rpob_ecoli</a> |
| P0A8V2 | RPOB_ECOLI | * | P0AE60 | P0A8V2 | <a href="#">ceda_ecoli</a>  | <a href="#">rpob_ecoli</a> |
| P0A8V2 | RPOB_ECOLI | * | P0AE60 | P0A8V2 | <a href="#">ceda_ecoli</a>  | <a href="#">rpob_ecoli</a> |
| P0A8V2 | RPOB_ECOLI | * | P0ABH9 | P0A8V2 | <a href="#">clpa_ecoli</a>  | <a href="#">rpob_ecoli</a> |
| P0A8V2 | RPOB_ECOLI | * | P0A9X9 | P0A8V2 | <a href="#">cspa_ecoli</a>  | <a href="#">rpob_ecoli</a> |
| P0A8V2 | RPOB_ECOLI | * | P0A972 | P0A8V2 | <a href="#">cspe_ecoli</a>  | <a href="#">rpob_ecoli</a> |
| P0A8V2 | RPOB_ECOLI | * | P37195 | P0A8V2 | <a href="#">dctr_ecoli</a>  | <a href="#">rpob_ecoli</a> |
| P0A8V2 | RPOB_ECOLI | * | P0AEE8 | P0A8V2 | <a href="#">dma_ecoli</a>   | <a href="#">rpob_ecoli</a> |
| P0A8V2 | RPOB_ECOLI | * | P00582 | P0A8V2 | <a href="#">dpo1_ecoli</a>  | <a href="#">rpob_ecoli</a> |
| P0A8V2 | RPOB_ECOLI | * | P37313 | P0A8V2 | <a href="#">dppf_ecoli</a>  | <a href="#">rpob_ecoli</a> |
| P0A8V2 | RPOB_ECOLI | * | P0ABU5 | P0A8V2 | <a href="#">elbb_ecoli</a>  | <a href="#">rpob_ecoli</a> |
| P0A8V2 | RPOB_ECOLI | * | P0A6Q3 | P0A8V2 | <a href="#">faba_ecoli</a>  | <a href="#">rpob_ecoli</a> |
| P0A8V2 | RPOB_ECOLI | * | P23484 | P0A8V2 | <a href="#">feci_ecoli</a>  | <a href="#">rpob_ecoli</a> |
| P0A8V2 | RPOB_ECOLI | * | P0AEM0 | P0A8V2 | <a href="#">fkbx_ecoli</a>  | <a href="#">rpob_ecoli</a> |
| P0A8V2 | RPOB_ECOLI | * | P0AEM6 | P0A8V2 | <a href="#">flia_ecoli</a>  | <a href="#">rpob_ecoli</a> |
| P0A8V2 | RPOB_ECOLI | * | P0A9B2 | P0A8V2 | <a href="#">g3p1_ecoli</a>  | <a href="#">rpob_ecoli</a> |
| P0A8V2 | RPOB_ECOLI | * | P05852 | P0A8V2 | <a href="#">gcp_ecoli</a>   | <a href="#">rpob_ecoli</a> |
| P0A8V2 | RPOB_ECOLI | * | P33195 | P0A8V2 | <a href="#">gcsp_ecoli</a>  | <a href="#">rpob_ecoli</a> |
| P0A8V2 | RPOB_ECOLI | * | P0A9Z1 | P0A8V2 | <a href="#">glnb_ecoli</a>  | <a href="#">rpob_ecoli</a> |
| P0A8V2 | RPOB_ECOLI | * | P0A6W5 | P0A8V2 | <a href="#">grea_ecoli</a>  | <a href="#">rpob_ecoli</a> |
| P0A8V2 | RPOB_ECOLI | * | P30128 | P0A8V2 | <a href="#">greb_ecoli</a>  | <a href="#">rpob_ecoli</a> |
| P0A8V2 | RPOB_ECOLI | * | P0A6X3 | P0A8V2 | <a href="#">hfq_ecoli</a>   | <a href="#">rpob_ecoli</a> |
| P0A8V2 | RPOB_ECOLI | * | P0ACF8 | P0A8V2 | <a href="#">hns_ecoli</a>   | <a href="#">rpob_ecoli</a> |
| P0A8V2 | RPOB_ECOLI | * | P77319 | P0A8V2 | <a href="#">hsccl_ecoli</a> | <a href="#">rpob_ecoli</a> |
| P0A8V2 | RPOB_ECOLI | * | P0C054 | P0A8V2 | <a href="#">ibpa_ecoli</a>  | <a href="#">rpob_ecoli</a> |



|        |            |          |        |            |            |
|--------|------------|----------|--------|------------|------------|
| POA8V2 | RPOB_ECOLI | * P0A9H3 | POA8V2 | ldci_ecoli | rpob_ecoli |
| POA8V2 | RPOB_ECOLI | * P0A9X4 | POA8V2 | mreb_ecoli | rpob_ecoli |
| POA8V2 | RPOB_ECOLI | * Q46877 | POA8V2 | norv_ecoli | rpob_ecoli |
| POA8V2 | RPOB_ECOLI | * P0AFF6 | POA8V2 | nusa_ecoli | rpob_ecoli |
| POA8V2 | RPOB_ECOLI | * P0AFF6 | POA8V2 | nusa_ecoli | rpob_ecoli |
| POA8V2 | RPOB_ECOLI | * P0AFF6 | POA8V2 | nusa_ecoli | rpob_ecoli |
| POA8V2 | RPOB_ECOLI | * P0AFG0 | POA8V2 | nusg_ecoli | rpob_ecoli |
| POA8V2 | RPOB_ECOLI | * P0AFG0 | POA8V2 | nusg_ecoli | rpob_ecoli |
| POA8V2 | RPOB_ECOLI | * P23869 | POA8V2 | ppib_ecoli | rpob_ecoli |
| POA8V2 | RPOB_ECOLI | * P0A7E5 | POA8V2 | pyrg_ecoli | rpob_ecoli |
| POA8V2 | RPOB_ECOLI | * P60240 | POA8V2 | rapa_ecoli | rpob_ecoli |
| POA8V2 | RPOB_ECOLI | * P25888 | POA8V2 | rhle_ecoli | rpob_ecoli |
| POA8V2 | RPOB_ECOLI | * P0AA39 | POA8V2 | rluc_ecoli | rpob_ecoli |
| POA8V2 | RPOB_ECOLI | * P0AA39 | POA8V2 | rluc_ecoli | rpob_ecoli |
| POA8V2 | RPOB_ECOLI | * P0AGB3 | POA8V2 | rp32_ecoli | rpob_ecoli |
| POA8V2 | RPOB_ECOLI | * P0AGB3 | POA8V2 | rp32_ecoli | rpob_ecoli |
| POA8V2 | RPOB_ECOLI | * P24255 | POA8V2 | rp54_ecoli | rpob_ecoli |
| POA8V2 | RPOB_ECOLI | * P24255 | POA8V2 | rp54_ecoli | rpob_ecoli |
| POA8V2 | RPOB_ECOLI | * P24255 | POA8V2 | rp54_ecoli | rpob_ecoli |
| POA8V2 | RPOB_ECOLI | * P0A7Z4 | POA8V2 | rpoa_ecoli | rpob_ecoli |
| POA8V2 | RPOB_ECOLI | * P0A7Z4 | POA8V2 | rpoa_ecoli | rpob_ecoli |
| POA8V2 | RPOB_ECOLI | * P0A7Z4 | POA8V2 | rpoa_ecoli | rpob_ecoli |
| POA8V2 | RPOB_ECOLI | * P0A7Z4 | POA8V2 | rpoa_ecoli | rpob_ecoli |
| POA8V2 | RPOB_ECOLI | * P0A8T7 | POA8V2 | rpoc_ecoli | rpob_ecoli |
| POA8V2 | RPOB_ECOLI | * P0A8T7 | POA8V2 | rpoc_ecoli | rpob_ecoli |
| POA8V2 | RPOB_ECOLI | * P0A8T7 | POA8V2 | rpoc_ecoli | rpob_ecoli |
| POA8V2 | RPOB_ECOLI | * P0A8T7 | POA8V2 | rpoc_ecoli | rpob_ecoli |
| POA8V2 | RPOB_ECOLI | * P00579 | POA8V2 | rpod_ecoli | rpob_ecoli |
| POA8V2 | RPOB_ECOLI | * P00579 | POA8V2 | rpod_ecoli | rpob_ecoli |
| POA8V2 | RPOB_ECOLI | * P00579 | POA8V2 | rpod_ecoli | rpob_ecoli |
| POA8V2 | RPOB_ECOLI | * P0AGB6 | POA8V2 | rpoe_ecoli | rpob_ecoli |
| POA8V2 | RPOB_ECOLI | * P13445 | POA8V2 | rpos_ecoli | rpob_ecoli |
| POA8V2 | RPOB_ECOLI | * P0A800 | POA8V2 | rpoz_ecoli | rpob_ecoli |
| POA8V2 | RPOB_ECOLI | * P0A800 | POA8V2 | rpoz_ecoli | rpob_ecoli |
| POA8V2 | RPOB_ECOLI | * P0A800 | POA8V2 | rpoz_ecoli | rpob_ecoli |
| POA8V2 | RPOB_ECOLI | * P0A828 | POA8V2 | smg_ecoli  | rpob_ecoli |
| POA8V2 | RPOB_ECOLI | * P28043 | POA8V2 | ssb2_ecolx | rpob_ecoli |
| POA8V2 | RPOB_ECOLI | * P0ACA3 | POA8V2 | sspa_ecoli | rpob_ecoli |
| POA8V2 | RPOB_ECOLI | * P0A8N5 | POA8V2 | syk2_ecoli | rpob_ecoli |
| POA8V2 | RPOB_ECOLI | * P0A847 | POA8V2 | tgt_ecoli  | rpob_ecoli |
| POA8V2 | RPOB_ECOLI | * P0A850 | POA8V2 | tig_ecoli  | rpob_ecoli |
| POA8V2 | RPOB_ECOLI | * P06612 | POA8V2 | top1_ecoli | rpob_ecoli |
| POA8V2 | RPOB_ECOLI | * P0A890 | POA8V2 | tusa_ecoli | rpob_ecoli |
| POA8V2 | RPOB_ECOLI | * P08390 | POA8V2 | usg_ecoli  | rpob_ecoli |
| POA8V2 | RPOB_ECOLI | * P39177 | POA8V2 | uspg_ecoli | rpob_ecoli |

|        |            |          |        |             |            |
|--------|------------|----------|--------|-------------|------------|
| POA8V2 | RPOB_ECOLI | * P03018 | POA8V2 | uvrd_ecoli  | rpob_ecoli |
| POA8V2 | RPOB_ECOLI | * P71242 | POA8V2 | wcak_ecoli  | rpob_ecoli |
| POA8V2 | RPOB_ECOLI | * P0A8E5 | POA8V2 | yacl_ecoli  | rpob_ecoli |
| POA8V2 | RPOB_ECOLI | * P0A8E5 | POA8V2 | yacl_ecoli  | rpob_ecoli |
| POA8V2 | RPOB_ECOLI | * P0A8J4 | POA8V2 | ybed_ecoli  | rpob_ecoli |
| POA8V2 | RPOB_ECOLI | * P75767 | POA8V2 | ybhk_ecoli  | rpob_ecoli |
| POA8V2 | RPOB_ECOLI | * P37757 | POA8V2 | ydde_ecoli  | rpob_ecoli |
| POA8V2 | RPOB_ECOLI | * P36928 | POA8V2 | yegd_ecoli  | rpob_ecoli |
| POA8V2 | RPOB_ECOLI | * P52119 | POA8V2 | yfjf_ecoli  | rpob_ecoli |
| POA8V2 | RPOB_ECOLI | * P23839 | POA8V2 | yicc_ecoli  | rpob_ecoli |
| POA8T7 | RPOC_ECOLI | * P36659 | POA8T7 | cbpa_ecoli  | rpoc_ecoli |
| POA8T7 | RPOC_ECOLI | * P0AE60 | POA8T7 | ceda_ecoli  | rpoc_ecoli |
| POA8T7 | RPOC_ECOLI | * P0AE60 | POA8T7 | ceda_ecoli  | rpoc_ecoli |
| POA8T7 | RPOC_ECOLI | * P0A6F5 | POA8T7 | ch60_ecoli  | rpoc_ecoli |
| POA8T7 | RPOC_ECOLI | * P0A6G5 | POA8T7 | citx_ecoli  | rpoc_ecoli |
| POA8T7 | RPOC_ECOLI | * P0ABH9 | POA8T7 | clpa_ecoli  | rpoc_ecoli |
| POA8T7 | RPOC_ECOLI | * P0A6G7 | POA8T7 | clpp_ecoli  | rpoc_ecoli |
| POA8T7 | RPOC_ECOLI | * P0A9X9 | POA8T7 | cspa_ecoli  | rpoc_ecoli |
| POA8T7 | RPOC_ECOLI | * P0A972 | POA8T7 | cspe_ecoli  | rpoc_ecoli |
| POA8T7 | RPOC_ECOLI | * P37195 | POA8T7 | dctr_ecoli  | rpoc_ecoli |
| POA8T7 | RPOC_ECOLI | * P0AEE8 | POA8T7 | dma_ecoli   | rpoc_ecoli |
| POA8T7 | RPOC_ECOLI | * P08622 | POA8T7 | dnaj_ecoli  | rpoc_ecoli |
| POA8T7 | RPOC_ECOLI | * P00582 | POA8T7 | dpo1_ecoli  | rpoc_ecoli |
| POA8T7 | RPOC_ECOLI | * P06710 | POA8T7 | dpo3x_ecoli | rpoc_ecoli |
| POA8T7 | RPOC_ECOLI | * P0A6Q3 | POA8T7 | faba_ecoli  | rpoc_ecoli |
| POA8T7 | RPOC_ECOLI | * P13036 | POA8T7 | feca_ecoli  | rpoc_ecoli |
| POA8T7 | RPOC_ECOLI | * P23484 | POA8T7 | feci_ecoli  | rpoc_ecoli |
| POA8T7 | RPOC_ECOLI | * P0A6R3 | POA8T7 | fis_ecoli   | rpoc_ecoli |
| POA8T7 | RPOC_ECOLI | * P0AEM0 | POA8T7 | fkbx_ecoli  | rpoc_ecoli |
| POA8T7 | RPOC_ECOLI | * P0AEM6 | POA8T7 | flia_ecoli  | rpoc_ecoli |
| POA8T7 | RPOC_ECOLI | * P0A9B2 | POA8T7 | g3p1_ecoli  | rpoc_ecoli |
| POA8T7 | RPOC_ECOLI | * P0A6W5 | POA8T7 | grea_ecoli  | rpoc_ecoli |
| POA8T7 | RPOC_ECOLI | * P30128 | POA8T7 | greb_ecoli  | rpoc_ecoli |
| POA8T7 | RPOC_ECOLI | * P0A6X3 | POA8T7 | hfq_ecoli   | rpoc_ecoli |
| POA8T7 | RPOC_ECOLI | * P0ACF8 | POA8T7 | hns_ecoli   | rpoc_ecoli |
| POA8T7 | RPOC_ECOLI | * P28632 | POA8T7 | hold_ecoli  | rpoc_ecoli |
| POA8T7 | RPOC_ECOLI | * P0A6L9 | POA8T7 | hscb_ecoli  | rpoc_ecoli |
| POA8T7 | RPOC_ECOLI | * P0A6Z3 | POA8T7 | htpg_ecoli  | rpoc_ecoli |
| POA8T7 | RPOC_ECOLI | * P0C054 | POA8T7 | ibpa_ecoli  | rpoc_ecoli |
| POA8T7 | RPOC_ECOLI | * P0A6Y1 | POA8T7 | ihfb_ecoli  | rpoc_ecoli |
| POA8T7 | RPOC_ECOLI | * P69441 | POA8T7 | kad_ecoli   | rpoc_ecoli |
| POA8T7 | RPOC_ECOLI | * P21645 | POA8T7 | lpxd_ecoli  | rpoc_ecoli |
| POA8T7 | RPOC_ECOLI | * P0A9X4 | POA8T7 | mreb_ecoli  | rpoc_ecoli |
| POA8T7 | RPOC_ECOLI | * P0AFF6 | POA8T7 | nusa_ecoli  | rpoc_ecoli |

|        |            |   |        |        |            |            |
|--------|------------|---|--------|--------|------------|------------|
| POA8T7 | RPOC_ECOLI | * | P0AFF6 | POA8T7 | nusa_ecoli | rpoc_ecoli |
| POA8T7 | RPOC_ECOLI | * | P0AFF6 | POA8T7 | nusa_ecoli | rpoc_ecoli |
| POA8T7 | RPOC_ECOLI | * | P0AFG0 | POA8T7 | nusg_ecoli | rpoc_ecoli |
| POA8T7 | RPOC_ECOLI | * | P0AFG0 | POA8T7 | nusg_ecoli | rpoc_ecoli |
| POA8T7 | RPOC_ECOLI | * | P0A7E5 | POA8T7 | pyrg_ecoli | rpoc_ecoli |
| POA8T7 | RPOC_ECOLI | * | P60240 | POA8T7 | rapa_ecoli | rpoc_ecoli |
| POA8T7 | RPOC_ECOLI | * | P60240 | POA8T7 | rapa_ecoli | rpoc_ecoli |
| POA8T7 | RPOC_ECOLI | * | P25888 | POA8T7 | rhle_ecoli | rpoc_ecoli |
| POA8T7 | RPOC_ECOLI | * | P60723 | POA8T7 | rl4_ecoli  | rpoc_ecoli |
| POA8T7 | RPOC_ECOLI | * | P36979 | POA8T7 | rlmn_ecoli | rpoc_ecoli |
| POA8T7 | RPOC_ECOLI | * | P0AA39 | POA8T7 | rluc_ecoli | rpoc_ecoli |
| POA8T7 | RPOC_ECOLI | * | P0AA39 | POA8T7 | rluc_ecoli | rpoc_ecoli |
| POA8T7 | RPOC_ECOLI | * | P0AGB3 | POA8T7 | rp32_ecoli | rpoc_ecoli |
| POA8T7 | RPOC_ECOLI | * | P0AGB3 | POA8T7 | rp32_ecoli | rpoc_ecoli |
| POA8T7 | RPOC_ECOLI | * | P24255 | POA8T7 | rp54_ecoli | rpoc_ecoli |
| POA8T7 | RPOC_ECOLI | * | P24255 | POA8T7 | rp54_ecoli | rpoc_ecoli |
| POA8T7 | RPOC_ECOLI | * | P0A7Z4 | POA8T7 | rpoa_ecoli | rpoc_ecoli |
| POA8T7 | RPOC_ECOLI | * | P0A7Z4 | POA8T7 | rpoa_ecoli | rpoc_ecoli |
| POA8T7 | RPOC_ECOLI | * | P0A7Z4 | POA8T7 | rpoa_ecoli | rpoc_ecoli |
| POA8T7 | RPOC_ECOLI | * | P0A7Z4 | POA8T7 | rpoa_ecoli | rpoc_ecoli |
| POA8T7 | RPOC_ECOLI | * | P0A8V2 | POA8T7 | rpob_ecoli | rpoc_ecoli |
| POA8T7 | RPOC_ECOLI | * | P0A8V2 | POA8T7 | rpob_ecoli | rpoc_ecoli |
| POA8T7 | RPOC_ECOLI | * | P0A8V2 | POA8T7 | rpob_ecoli | rpoc_ecoli |
| POA8T7 | RPOC_ECOLI | * | P00579 | POA8T7 | rpod_ecoli | rpoc_ecoli |
| POA8T7 | RPOC_ECOLI | * | P00579 | POA8T7 | rpod_ecoli | rpoc_ecoli |
| POA8T7 | RPOC_ECOLI | * | P00579 | POA8T7 | rpod_ecoli | rpoc_ecoli |
| POA8T7 | RPOC_ECOLI | * | P00579 | POA8T7 | rpod_ecoli | rpoc_ecoli |
| POA8T7 | RPOC_ECOLI | * | P0AGB6 | POA8T7 | rpoe_ecoli | rpoc_ecoli |
| POA8T7 | RPOC_ECOLI | * | P13445 | POA8T7 | rpos_ecoli | rpoc_ecoli |
| POA8T7 | RPOC_ECOLI | * | P0A800 | POA8T7 | rpoz_ecoli | rpoc_ecoli |
| POA8T7 | RPOC_ECOLI | * | P0A800 | POA8T7 | rpoz_ecoli | rpoc_ecoli |
| POA8T7 | RPOC_ECOLI | * | P0AFX4 | POA8T7 | rsd_ecoli  | rpoc_ecoli |
| POA8T7 | RPOC_ECOLI | * | P16456 | POA8T7 | seld_ecoli | rpoc_ecoli |
| POA8T7 | RPOC_ECOLI | * | P0A828 | POA8T7 | smg_ecoli  | rpoc_ecoli |
| POA8T7 | RPOC_ECOLI | * | P21170 | POA8T7 | spea_ecoli | rpoc_ecoli |
| POA8T7 | RPOC_ECOLI | * | P0AG24 | POA8T7 | spot_ecoli | rpoc_ecoli |
| POA8T7 | RPOC_ECOLI | * | P28043 | POA8T7 | ssb2_ecolx | rpoc_ecoli |
| POA8T7 | RPOC_ECOLI | * | P0ACA3 | POA8T7 | sspa_ecoli | rpoc_ecoli |
| POA8T7 | RPOC_ECOLI | * | P21889 | POA8T7 | syd_ecoli  | rpoc_ecoli |
| POA8T7 | RPOC_ECOLI | * | P0A8N5 | POA8T7 | syk2_ecoli | rpoc_ecoli |
| POA8T7 | RPOC_ECOLI | * | P04968 | POA8T7 | thd1_ecoli | rpoc_ecoli |
| POA8T7 | RPOC_ECOLI | * | P0A850 | POA8T7 | tig_ecoli  | rpoc_ecoli |
| POA8T7 | RPOC_ECOLI | * | P06612 | POA8T7 | top1_ecoli | rpoc_ecoli |
| POA8T7 | RPOC_ECOLI | * | P06612 | POA8T7 | top1_ecoli | rpoc_ecoli |
| POA8T7 | RPOC_ECOLI | * | P08390 | POA8T7 | usg_ecoli  | rpoc_ecoli |

|        |            |          |        |            |             |
|--------|------------|----------|--------|------------|-------------|
| POA8T7 | RPOC_ECOLI | * P08390 | POA8T7 | usg_ecoli  | rpoc_ecoli  |
| POA8T7 | RPOC_ECOLI | * P08390 | POA8T7 | usg_ecoli  | rpoc_ecoli  |
| POA8T7 | RPOC_ECOLI | * P39177 | POA8T7 | uspg_ecoli | rpoc_ecoli  |
| POA8T7 | RPOC_ECOLI | * P75970 | POA8T7 | vxis_ecoli | rpoc_ecoli  |
| POA8T7 | RPOC_ECOLI | * P71242 | POA8T7 | wcak_ecoli | rpoc_ecoli  |
| POA8T7 | RPOC_ECOLI | * P0A8E5 | POA8T7 | yacl_ecoli | rpoc_ecoli  |
| POA8T7 | RPOC_ECOLI | * P0A8E5 | POA8T7 | yacl_ecoli | rpoc_ecoli  |
| POA8T7 | RPOC_ECOLI | * P0AFP4 | POA8T7 | ybb0_ecoli | rpoc_ecoli  |
| POA8T7 | RPOC_ECOLI | * P0AAS7 | POA8T7 | ybcj_ecoli | rpoc_ecoli  |
| POA8T7 | RPOC_ECOLI | * P0A8J4 | POA8T7 | ybed_ecoli | rpoc_ecoli  |
| POA8T7 | RPOC_ECOLI | * P75829 | POA8T7 | ybjx_ecoli | rpoc_ecoli  |
| POA8T7 | RPOC_ECOLI | * P0AD05 | POA8T7 | yeca_ecoli | rpoc_ecoli  |
| POA8T7 | RPOC_ECOLI | * P36928 | POA8T7 | yegd_ecoli | rpoc_ecoli  |
| POA8T7 | RPOC_ECOLI | * P52119 | POA8T7 | yfjf_ecoli | rpoc_ecoli  |
| POA8T7 | RPOC_ECOLI | * Q46906 | POA8T7 | ygcp_ecoli | rpoc_ecoli  |
|        |            |          |        |            |             |
| P00579 | RPOD_ECOLI | * P0AE60 | P00579 | ceda_ecoli | rpod_ecoli  |
| P00579 | RPOD_ECOLI | * P0AE60 | P00579 | ceda_ecoli | rpod_ecoli  |
| P00579 | RPOD_ECOLI | * P0A9B2 | P00579 | g3p1_ecoli | rpod_ecoli  |
| P00579 | RPOD_ECOLI | * P0AFF6 | P00579 | nusa_ecoli | rpod_ecoli  |
| P00579 | RPOD_ECOLI | * P0A7Z4 | P00579 | rpoa_ecoli | rpod_ecoli  |
| P00579 | RPOD_ECOLI | * P0A7Z4 | P00579 | rpoa_ecoli | rpod_ecoli  |
| P00579 | RPOD_ECOLI | * P0A7Z4 | P00579 | rpoa_ecoli | rpod_ecoli  |
| P00579 | RPOD_ECOLI | * P0A8V2 | P00579 | rpob_ecoli | rpod_ecoli  |
| P00579 | RPOD_ECOLI | * P0A8V2 | P00579 | rpob_ecoli | rpod_ecoli  |
| P00579 | RPOD_ECOLI | * P0A8T7 | P00579 | rpoc_ecoli | rpod_ecoli  |
| P00579 | RPOD_ECOLI | * P0A8T7 | P00579 | rpoc_ecoli | rpod_ecoli  |
| P00579 | RPOD_ECOLI | * P0A8T7 | P00579 | rpoc_ecoli | rpod_ecoli  |
| P00579 | RPOD_ECOLI | * P0A8T7 | P00579 | rpoc_ecoli | rpod_ecoli  |
| P00579 | RPOD_ECOLI | * P0A800 | P00579 | rpoz_ecoli | rpod_ecoli  |
| P00579 | RPOD_ECOLI | * P0A800 | P00579 | rpoz_ecoli | rpod_ecoli  |
| P00579 | RPOD_ECOLI | * P0AFX4 | P00579 | rsd_ecoli  | rpod_ecoli  |
|        |            |          |        |            |             |
| POA776 | RPPH_ECOLI | none     |        |            |             |
|        |            |          |        |            |             |
| POA8R0 | RRAA_ECOLI | * P29131 | POA8R0 | ftsn_ecoli | rreaa_ecoli |
|        |            |          |        |            |             |
| POA805 | RRF_ECOLI  | * Q47269 | POA805 | ybcn_ecoli | rpf_ecoli   |
|        |            |          |        |            |             |
| P0AG67 | RS1_ECOLI  | * P36659 | P0AG67 | cbpa_ecoli | rs1_ecoli   |
| P0AG67 | RS1_ECOLI  | * P0ABH9 | P0AG67 | clpa_ecoli | rs1_ecoli   |
| P0AG67 | RS1_ECOLI  | * P0ABH9 | P0AG67 | clpa_ecoli | rs1_ecoli   |
| P0AG67 | RS1_ECOLI  | * P63284 | P0AG67 | clpb_ecoli | rs1_ecoli   |
| P0AG67 | RS1_ECOLI  | * P0A9Y6 | P0AG67 | cspc_ecoli | rs1_ecoli   |
| P0AG67 | RS1_ECOLI  | * P0A9Y6 | P0AG67 | cspc_ecoli | rs1_ecoli   |

|        |           |   |        |        |                            |                           |
|--------|-----------|---|--------|--------|----------------------------|---------------------------|
| P0AG67 | RS1_ECOLI | * | P0A968 | P0AG67 | <a href="#">cspd_ecoli</a> | <a href="#">rs1_ecoli</a> |
| P0AG67 | RS1_ECOLI | * | P0A972 | P0AG67 | <a href="#">cspe_ecoli</a> | <a href="#">rs1_ecoli</a> |
| P0AG67 | RS1_ECOLI | * | P0A9P6 | P0AG67 | <a href="#">dead_ecoli</a> | <a href="#">rs1_ecoli</a> |
| P0AG67 | RS1_ECOLI | * | P0A9P6 | P0AG67 | <a href="#">dead_ecoli</a> | <a href="#">rs1_ecoli</a> |
| P0AG67 | RS1_ECOLI | * | P0ACK5 | P0AG67 | <a href="#">deor_ecoli</a> | <a href="#">rs1_ecoli</a> |
| P0AG67 | RS1_ECOLI | * | P0A6Y8 | P0AG67 | <a href="#">dnak_ecoli</a> | <a href="#">rs1_ecoli</a> |
| P0AG67 | RS1_ECOLI | * | P19636 | P0AG67 | <a href="#">eutc_ecoli</a> | <a href="#">rs1_ecoli</a> |
| P0AG67 | RS1_ECOLI | * | P0A6Q3 | P0AG67 | <a href="#">faba_ecoli</a> | <a href="#">rs1_ecoli</a> |
| P0AG67 | RS1_ECOLI | * | P0AEK4 | P0AG67 | <a href="#">fabi_ecoli</a> | <a href="#">rs1_ecoli</a> |
| P0AG67 | RS1_ECOLI | * | P0A6Q6 | P0AG67 | <a href="#">fabz_ecoli</a> | <a href="#">rs1_ecoli</a> |
| P0AG67 | RS1_ECOLI | * | P52614 | P0AG67 | <a href="#">flik_ecoli</a> | <a href="#">rs1_ecoli</a> |
| P0AG67 | RS1_ECOLI | * | P15038 | P0AG67 | <a href="#">held_ecoli</a> | <a href="#">rs1_ecoli</a> |
| P0AG67 | RS1_ECOLI | * | P0A6X3 | P0AG67 | <a href="#">hfq_ecoli</a>  | <a href="#">rs1_ecoli</a> |
| P0AG67 | RS1_ECOLI | * | P0A6X3 | P0AG67 | <a href="#">hfq_ecoli</a>  | <a href="#">rs1_ecoli</a> |
| P0AG67 | RS1_ECOLI | * | P0ABS8 | P0AG67 | <a href="#">hole_ecoli</a> | <a href="#">rs1_ecoli</a> |
| P0AG67 | RS1_ECOLI | * | P43329 | P0AG67 | <a href="#">hrpa_ecoli</a> | <a href="#">rs1_ecoli</a> |
| P0AG67 | RS1_ECOLI | * | P0C054 | P0AG67 | <a href="#">ibpa_ecoli</a> | <a href="#">rs1_ecoli</a> |
| P0AG67 | RS1_ECOLI | * | P32053 | P0AG67 | <a href="#">inta_ecoli</a> | <a href="#">rs1_ecoli</a> |
| P0AG67 | RS1_ECOLI | * | P04951 | P0AG67 | <a href="#">kdsb_ecoli</a> | <a href="#">rs1_ecoli</a> |
| P0AG67 | RS1_ECOLI | * | P23331 | P0AG67 | <a href="#">kith_ecoli</a> | <a href="#">rs1_ecoli</a> |
| P0AG67 | RS1_ECOLI | * | P23367 | P0AG67 | <a href="#">mutl_ecoli</a> | <a href="#">rs1_ecoli</a> |
| P0AG67 | RS1_ECOLI | * | P0A9K3 | P0AG67 | <a href="#">phol_ecoli</a> | <a href="#">rs1_ecoli</a> |
| P0AG67 | RS1_ECOLI | * | P23862 | P0AG67 | <a href="#">pric_ecoli</a> | <a href="#">rs1_ecoli</a> |
| P0AG67 | RS1_ECOLI | * | P23830 | P0AG67 | <a href="#">pss_ecoli</a>  | <a href="#">rs1_ecoli</a> |
| P0AG67 | RS1_ECOLI | * | P0A7E9 | P0AG67 | <a href="#">pyrh_ecoli</a> | <a href="#">rs1_ecoli</a> |
| P0AG67 | RS1_ECOLI | * | P25888 | P0AG67 | <a href="#">rhle_ecoli</a> | <a href="#">rs1_ecoli</a> |
| P0AG67 | RS1_ECOLI | * | P36979 | P0AG67 | <a href="#">rlmn_ecoli</a> | <a href="#">rs1_ecoli</a> |
| P0AG67 | RS1_ECOLI | * | P36979 | P0AG67 | <a href="#">rlmn_ecoli</a> | <a href="#">rs1_ecoli</a> |
| P0AG67 | RS1_ECOLI | * | P37765 | P0AG67 | <a href="#">rlub_ecoli</a> | <a href="#">rs1_ecoli</a> |
| P0AG67 | RS1_ECOLI | * | P37765 | P0AG67 | <a href="#">rlub_ecoli</a> | <a href="#">rs1_ecoli</a> |
| P0AG67 | RS1_ECOLI | * | P0AA39 | P0AG67 | <a href="#">rluc_ecoli</a> | <a href="#">rs1_ecoli</a> |
| P0AG67 | RS1_ECOLI | * | P0A7Y8 | P0AG67 | <a href="#">rnpa_ecoli</a> | <a href="#">rs1_ecoli</a> |
| P0AG67 | RS1_ECOLI | * | P21499 | P0AG67 | <a href="#">rnr_ecoli</a>  | <a href="#">rs1_ecoli</a> |
| P0AG67 | RS1_ECOLI | * | P0A7Z4 | P0AG67 | <a href="#">rpoa_ecoli</a> | <a href="#">rs1_ecoli</a> |
| P0AG67 | RS1_ECOLI | * | P0A8T7 | P0AG67 | <a href="#">rpoc_ecoli</a> | <a href="#">rs1_ecoli</a> |
| P0AG67 | RS1_ECOLI | * | P00579 | P0AG67 | <a href="#">rpod_ecoli</a> | <a href="#">rs1_ecoli</a> |
| P0AG67 | RS1_ECOLI | * | P0A776 | P0AG67 | <a href="#">rpph_ecoli</a> | <a href="#">rs1_ecoli</a> |
| P0AG67 | RS1_ECOLI | * | P0A776 | P0AG67 | <a href="#">rpph_ecoli</a> | <a href="#">rs1_ecoli</a> |
| P0AG67 | RS1_ECOLI | * | P39286 | P0AG67 | <a href="#">rsga_ecoli</a> | <a href="#">rs1_ecoli</a> |
| P0AG67 | RS1_ECOLI | * | P0A812 | P0AG67 | <a href="#">ruvb_ecoli</a> | <a href="#">rs1_ecoli</a> |
| P0AG67 | RS1_ECOLI | * | P14081 | P0AG67 | <a href="#">selb_ecoli</a> | <a href="#">rs1_ecoli</a> |
| P0AG67 | RS1_ECOLI | * | P0AG24 | P0AG67 | <a href="#">spot_ecoli</a> | <a href="#">rs1_ecoli</a> |
| P0AG67 | RS1_ECOLI | * | P15082 | P0AG67 | <a href="#">srlr_ecoli</a> | <a href="#">rs1_ecoli</a> |
| P0AG67 | RS1_ECOLI | * | P0A832 | P0AG67 | <a href="#">ssrp_ecoli</a> | <a href="#">rs1_ecoli</a> |
| P0AG67 | RS1_ECOLI | * | P0A832 | P0AG67 | <a href="#">ssrp_ecoli</a> | <a href="#">rs1_ecoli</a> |



|        |           |          |        |                            |                           |
|--------|-----------|----------|--------|----------------------------|---------------------------|
| P0AG67 | RS1_ECOLI | * P0A8M3 | P0AG67 | <a href="#">syt_ecoli</a>  | <a href="#">rs1_ecoli</a> |
| P0AG67 | RS1_ECOLI | * P0A847 | P0AG67 | <a href="#">tgt_ecoli</a>  | <a href="#">rs1_ecoli</a> |
| P0AG67 | RS1_ECOLI | * P0A850 | P0AG67 | <a href="#">tig_ecoli</a>  | <a href="#">rs1_ecoli</a> |
| P0AG67 | RS1_ECOLI | * P0A850 | P0AG67 | <a href="#">tig_ecoli</a>  | <a href="#">rs1_ecoli</a> |
| P0AG67 | RS1_ECOLI | * P52097 | P0AG67 | <a href="#">tils_ecoli</a> | <a href="#">rs1_ecoli</a> |
| P0AG67 | RS1_ECOLI | * P0A8I5 | P0AG67 | <a href="#">trmb_ecoli</a> | <a href="#">rs1_ecoli</a> |
| P0AG67 | RS1_ECOLI | * P00895 | P0AG67 | <a href="#">trpe_ecoli</a> | <a href="#">rs1_ecoli</a> |
| P0AG67 | RS1_ECOLI | * P17993 | P0AG67 | <a href="#">ubig_ecoli</a> | <a href="#">rs1_ecoli</a> |
| P0AG67 | RS1_ECOLI | * P0A9W0 | P0AG67 | <a href="#">ular_ecoli</a> | <a href="#">rs1_ecoli</a> |
| P0AG67 | RS1_ECOLI | * P0A8G0 | P0AG67 | <a href="#">uvrc_ecoli</a> | <a href="#">rs1_ecoli</a> |
| P0AG67 | RS1_ECOLI | * P0A8E5 | P0AG67 | <a href="#">yacl_ecoli</a> | <a href="#">rs1_ecoli</a> |
| P0AG67 | RS1_ECOLI | * P0AAS7 | P0AG67 | <a href="#">ybcj_ecoli</a> | <a href="#">rs1_ecoli</a> |
| P0AG67 | RS1_ECOLI | * P0AAS7 | P0AG67 | <a href="#">ybcj_ecoli</a> | <a href="#">rs1_ecoli</a> |
| P0AG67 | RS1_ECOLI | * P75829 | P0AG67 | <a href="#">ybjx_ecoli</a> | <a href="#">rs1_ecoli</a> |
| P0AG67 | RS1_ECOLI | * P75829 | P0AG67 | <a href="#">ybjx_ecoli</a> | <a href="#">rs1_ecoli</a> |
| P0AG67 | RS1_ECOLI | * P0AAZ7 | P0AG67 | <a href="#">ycar_ecoli</a> | <a href="#">rs1_ecoli</a> |
| P0AG67 | RS1_ECOLI | * P0AB43 | P0AG67 | <a href="#">ycgl_ecoli</a> | <a href="#">rs1_ecoli</a> |
| P0AG67 | RS1_ECOLI | * P76104 | P0AG67 | <a href="#">ydcg_ecoli</a> | <a href="#">rs1_ecoli</a> |
| P0AG67 | RS1_ECOLI | * P0ACY9 | P0AG67 | <a href="#">yebg_ecoli</a> | <a href="#">rs1_ecoli</a> |
| P0AG67 | RS1_ECOLI | * P76594 | P0AG67 | <a href="#">yfiq_ecoli</a> | <a href="#">rs1_ecoli</a> |
| P0AG67 | RS1_ECOLI | * P0AF67 | P0AG67 | <a href="#">yjee_ecoli</a> | <a href="#">rs1_ecoli</a> |
| P0AG67 | RS1_ECOLI | * P75992 | P0AG67 | <a href="#">ymga_ecoli</a> | <a href="#">rs1_ecoli</a> |

|        |            |          |        |                            |                            |
|--------|------------|----------|--------|----------------------------|----------------------------|
| P0A7R5 | RS10_ECOLI | * P0AE18 | P0A7R5 | <a href="#">ampm_ecoli</a> | <a href="#">rs10_ecoli</a> |
| P0A7R5 | RS10_ECOLI | * P0ABH9 | P0A7R5 | <a href="#">clpa_ecoli</a> | <a href="#">rs10_ecoli</a> |
| P0A7R5 | RS10_ECOLI | * P63284 | P0A7R5 | <a href="#">clpb_ecoli</a> | <a href="#">rs10_ecoli</a> |
| P0A7R5 | RS10_ECOLI | * P0A6G7 | P0A7R5 | <a href="#">clpp_ecoli</a> | <a href="#">rs10_ecoli</a> |
| P0A7R5 | RS10_ECOLI | * P0ACJ8 | P0A7R5 | <a href="#">crp_ecoli</a>  | <a href="#">rs10_ecoli</a> |
| P0A7R5 | RS10_ECOLI | * P0A9X9 | P0A7R5 | <a href="#">cspa_ecoli</a> | <a href="#">rs10_ecoli</a> |
| P0A7R5 | RS10_ECOLI | * P36995 | P0A7R5 | <a href="#">cspb_ecoli</a> | <a href="#">rs10_ecoli</a> |
| P0A7R5 | RS10_ECOLI | * P0A9Y6 | P0A7R5 | <a href="#">cspc_ecoli</a> | <a href="#">rs10_ecoli</a> |
| P0A7R5 | RS10_ECOLI | * P0A968 | P0A7R5 | <a href="#">cspd_ecoli</a> | <a href="#">rs10_ecoli</a> |
| P0A7R5 | RS10_ECOLI | * P0A972 | P0A7R5 | <a href="#">cspe_ecoli</a> | <a href="#">rs10_ecoli</a> |
| P0A7R5 | RS10_ECOLI | * P0A9P6 | P0A7R5 | <a href="#">dead_ecoli</a> | <a href="#">rs10_ecoli</a> |
| P0A7R5 | RS10_ECOLI | * P03004 | P0A7R5 | <a href="#">dnaa_ecoli</a> | <a href="#">rs10_ecoli</a> |
| P0A7R5 | RS10_ECOLI | * P08622 | P0A7R5 | <a href="#">dnaj_ecoli</a> | <a href="#">rs10_ecoli</a> |
| P0A7R5 | RS10_ECOLI | * P08622 | P0A7R5 | <a href="#">dnaj_ecoli</a> | <a href="#">rs10_ecoli</a> |
| P0A7R5 | RS10_ECOLI | * P0ABT2 | P0A7R5 | <a href="#">dps_ecoli</a>  | <a href="#">rs10_ecoli</a> |
| P0A7R5 | RS10_ECOLI | * P33371 | P0A7R5 | <a href="#">dusc_ecoli</a> | <a href="#">rs10_ecoli</a> |
| P0A7R5 | RS10_ECOLI | * P0AEK4 | P0A7R5 | <a href="#">fabi_ecoli</a> | <a href="#">rs10_ecoli</a> |
| P0A7R5 | RS10_ECOLI | * P0A6R3 | P0A7R5 | <a href="#">fis_ecoli</a>  | <a href="#">rs10_ecoli</a> |
| P0A7R5 | RS10_ECOLI | * P0AEM0 | P0A7R5 | <a href="#">fkbx_ecoli</a> | <a href="#">rs10_ecoli</a> |
| P0A7R5 | RS10_ECOLI | * P77609 | P0A7R5 | <a href="#">flxa_ecoli</a> | <a href="#">rs10_ecoli</a> |
| P0A7R5 | RS10_ECOLI | * P0A9R7 | P0A7R5 | <a href="#">ftse_ecoli</a> | <a href="#">rs10_ecoli</a> |
| P0A7R5 | RS10_ECOLI | * P0A9A6 | P0A7R5 | <a href="#">ftsz_ecoli</a> | <a href="#">rs10_ecoli</a> |



|        |            |          |        |             |            |
|--------|------------|----------|--------|-------------|------------|
| POA7R5 | RS10_ECOLI | * P05852 | POA7R5 | gcp_ecoli   | rs10_ecoli |
| POA7R5 | RS10_ECOLI | * P31120 | POA7R5 | glmm_ecoli  | rs10_ecoli |
| POA7R5 | RS10_ECOLI | * P0A6W5 | POA7R5 | grea_ecoli  | rs10_ecoli |
| POA7R5 | RS10_ECOLI | * P69931 | POA7R5 | hda_ecoli   | rs10_ecoli |
| POA7R5 | RS10_ECOLI | * P28631 | POA7R5 | holb_ecoli  | rs10_ecoli |
| POA7R5 | RS10_ECOLI | * P28905 | POA7R5 | holc_ecoli  | rs10_ecoli |
| POA7R5 | RS10_ECOLI | * P0ABS8 | POA7R5 | hole_ecoli  | rs10_ecoli |
| POA7R5 | RS10_ECOLI | * P0A6Y5 | POA7R5 | hslo_ecoli  | rs10_ecoli |
| POA7R5 | RS10_ECOLI | * P0ACG8 | POA7R5 | hslr_ecoli  | rs10_ecoli |
| POA7R5 | RS10_ECOLI | * P0A6H5 | POA7R5 | hslu_ecoli  | rs10_ecoli |
| POA7R5 | RS10_ECOLI | * P0A7A9 | POA7R5 | ipy_r_ecoli | rs10_ecoli |
| POA7R5 | RS10_ECOLI | * P22939 | POA7R5 | ispa_ecoli  | rs10_ecoli |
| POA7R5 | RS10_ECOLI | * P62617 | POA7R5 | ispf_ecoli  | rs10_ecoli |
| POA7R5 | RS10_ECOLI | * P0A715 | POA7R5 | kdsa_ecoli  | rs10_ecoli |
| POA7R5 | RS10_ECOLI | * P0AC75 | POA7R5 | kdta_ecoli  | rs10_ecoli |
| POA7R5 | RS10_ECOLI | * P0A9H3 | POA7R5 | ldci_ecoli  | rs10_ecoli |
| POA7R5 | RS10_ECOLI | * P60785 | POA7R5 | lepa_ecoli  | rs10_ecoli |
| POA7R5 | RS10_ECOLI | * P61316 | POA7R5 | lola_ecoli  | rs10_ecoli |
| POA7R5 | RS10_ECOLI | * P0A722 | POA7R5 | lpxa_ecoli  | rs10_ecoli |
| POA7R5 | RS10_ECOLI | * P21645 | POA7R5 | lpxd_ecoli  | rs10_ecoli |
| POA7R5 | RS10_ECOLI | * P0ACE0 | POA7R5 | mbhm_ecoli  | rs10_ecoli |
| POA7R5 | RS10_ECOLI | * P25522 | POA7R5 | mnme_ecoli  | rs10_ecoli |
| POA7R5 | RS10_ECOLI | * P22523 | POA7R5 | mukb_ecoli  | rs10_ecoli |
| POA7R5 | RS10_ECOLI | * P22523 | POA7R5 | mukb_ecoli  | rs10_ecoli |
| POA7R5 | RS10_ECOLI | * P0A749 | POA7R5 | mura_ecoli  | rs10_ecoli |
| POA7R5 | RS10_ECOLI | * P0A8D0 | POA7R5 | nrd_r_ecoli | rs10_ecoli |
| POA7R5 | RS10_ECOLI | * P0A780 | POA7R5 | nusb_ecoli  | rs10_ecoli |
| POA7R5 | RS10_ECOLI | * P0A780 | POA7R5 | nusb_ecoli  | rs10_ecoli |
| POA7R5 | RS10_ECOLI | * P0AFG0 | POA7R5 | nusg_ecoli  | rs10_ecoli |
| POA7R5 | RS10_ECOLI | * P0AFG0 | POA7R5 | nusg_ecoli  | rs10_ecoli |
| POA7R5 | RS10_ECOLI | * P0AFI2 | POA7R5 | parc_ecoli  | rs10_ecoli |
| POA7R5 | RS10_ECOLI | * P0A7A7 | POA7R5 | plsb_ecoli  | rs10_ecoli |
| POA7R5 | RS10_ECOLI | * P0A7D1 | POA7R5 | pth_ecoli   | rs10_ecoli |
| POA7R5 | RS10_ECOLI | * P0A7E9 | POA7R5 | pyrh_ecoli  | rs10_ecoli |
| POA7R5 | RS10_ECOLI | * P77756 | POA7R5 | quec_ecoli  | rs10_ecoli |
| POA7R5 | RS10_ECOLI | * P69407 | POA7R5 | rcsb_ecoli  | rs10_ecoli |
| POA7R5 | RS10_ECOLI | * P0A8J8 | POA7R5 | rhlb_ecoli  | rs10_ecoli |
| POA7R5 | RS10_ECOLI | * P25888 | POA7R5 | rhle_ecoli  | rs10_ecoli |
| POA7R5 | RS10_ECOLI | * P45748 | POA7R5 | rimn_ecoli  | rs10_ecoli |
| POA7R5 | RS10_ECOLI | * P63177 | POA7R5 | rlmb_ecoli  | rs10_ecoli |
| POA7R5 | RS10_ECOLI | * P36979 | POA7R5 | rlmn_ecoli  | rs10_ecoli |
| POA7R5 | RS10_ECOLI | * P36979 | POA7R5 | rlmn_ecoli  | rs10_ecoli |
| POA7R5 | RS10_ECOLI | * P37765 | POA7R5 | rlub_ecoli  | rs10_ecoli |
| POA7R5 | RS10_ECOLI | * P37765 | POA7R5 | rlub_ecoli  | rs10_ecoli |
| POA7R5 | RS10_ECOLI | * P33643 | POA7R5 | rlud_ecoli  | rs10_ecoli |

|        |            |          |        |            |            |
|--------|------------|----------|--------|------------|------------|
| P0A7R5 | RS10_ECOLI | * P21513 | P0A7R5 | rne_ecoli  | rs10_ecoli |
| P0A7R5 | RS10_ECOLI | * P0A7Y8 | P0A7R5 | rnpa_ecoli | rs10_ecoli |
| P0A7R5 | RS10_ECOLI | * P0A7Z4 | P0A7R5 | rpoa_ecoli | rs10_ecoli |
| P0A7R5 | RS10_ECOLI | * P0A8V2 | P0A7R5 | rpob_ecoli | rs10_ecoli |
| P0A7R5 | RS10_ECOLI | * P0A8V2 | P0A7R5 | rpob_ecoli | rs10_ecoli |
| P0A7R5 | RS10_ECOLI | * P0A8T7 | P0A7R5 | rpoc_ecoli | rs10_ecoli |
| P0A7R5 | RS10_ECOLI | * P0A800 | P0A7R5 | rpoz_ecoli | rs10_ecoli |
| P0A7R5 | RS10_ECOLI | * P39286 | P0A7R5 | rsga_ecoli | rs10_ecoli |
| P0A7R5 | RS10_ECOLI | * P60390 | P0A7R5 | rsmh_ecoli | rs10_ecoli |
| P0A7R5 | RS10_ECOLI | * P0AA43 | P0A7R5 | rsua_ecoli | rs10_ecoli |
| P0A7R5 | RS10_ECOLI | * P0AA43 | P0A7R5 | rsua_ecoli | rs10_ecoli |
| P0A7R5 | RS10_ECOLI | * P0A812 | P0A7R5 | ruvb_ecoli | rs10_ecoli |
| P0A7R5 | RS10_ECOLI | * P0AG24 | P0A7R5 | spot_ecoli | rs10_ecoli |
| P0A7R5 | RS10_ECOLI | * P07813 | P0A7R5 | syl_ecoli  | rs10_ecoli |
| P0A7R5 | RS10_ECOLI | * P0A8M3 | P0A7R5 | syt_ecoli  | rs10_ecoli |
| P0A7R5 | RS10_ECOLI | * P0A850 | P0A7R5 | tig_ecoli  | rs10_ecoli |
| P0A7R5 | RS10_ECOLI | * P0A9W0 | P0A7R5 | ular_ecoli | rs10_ecoli |
| P0A7R5 | RS10_ECOLI | * P0A8G0 | P0A7R5 | uvrc_ecoli | rs10_ecoli |
| P0A7R5 | RS10_ECOLI | * P0A8E5 | P0A7R5 | yacl_ecoli | rs10_ecoli |
| P0A7R5 | RS10_ECOLI | * P0AAQ2 | P0A7R5 | yajd_ecoli | rs10_ecoli |
| P0A7R5 | RS10_ECOLI | * P0AAR3 | P0A7R5 | ybak_ecoli | rs10_ecoli |
| P0A7R5 | RS10_ECOLI | * P0AFP2 | P0A7R5 | ybaz_ecoli | rs10_ecoli |
| P0A7R5 | RS10_ECOLI | * P0AB28 | P0A7R5 | yced_ecoli | rs10_ecoli |
| P0A7R5 | RS10_ECOLI | * P0A8Z0 | P0A7R5 | ycia_ecoli | rs10_ecoli |
| P0A7R5 | RS10_ECOLI | * P0A8L7 | P0A7R5 | yciu_ecoli | rs10_ecoli |
| P0A7R5 | RS10_ECOLI | * P39199 | P0A7R5 | yfcb_ecoli | rs10_ecoli |
| P0A7R5 | RS10_ECOLI | * P76578 | P0A7R5 | yfhm_ecoli | rs10_ecoli |
| P0A7R5 | RS10_ECOLI | * P76594 | P0A7R5 | yfiq_ecoli | rs10_ecoli |
| P0A7R5 | RS10_ECOLI | * P67080 | P0A7R5 | yggg_ecoli | rs10_ecoli |
| P0A7R5 | RS10_ECOLI | * P56259 | P0A7R5 | yifn_ecoli | rs10_ecoli |
|        |            |          |        |            |            |
| P0A7R9 | RS11_ECOLI | * P0A9P6 | P0A7R9 | dead_ecoli | rs11_ecoli |
| P0A7R9 | RS11_ECOLI | * P0A715 | P0A7R9 | kdsa_ecoli | rs11_ecoli |
| P0A7R9 | RS11_ECOLI | * P0A7Y8 | P0A7R9 | rnpa_ecoli | rs11_ecoli |
| P0A7R9 | RS11_ECOLI | * P21499 | P0A7R9 | rnrc_ecoli | rs11_ecoli |
| P0A7R9 | RS11_ECOLI | * P0AG24 | P0A7R9 | spot_ecoli | rs11_ecoli |
| P0A7R9 | RS11_ECOLI | * P0A850 | P0A7R9 | tig_ecoli  | rs11_ecoli |
| P0A7R9 | RS11_ECOLI | * P0A8G0 | P0A7R9 | uvrc_ecoli | rs11_ecoli |
| P0A7R9 | RS11_ECOLI | * P0A8E5 | P0A7R9 | yacl_ecoli | rs11_ecoli |
| P0A7R9 | RS11_ECOLI | * P0AGJ5 | P0A7R9 | yfif_ecoli | rs11_ecoli |
|        |            |          |        |            |            |
| P0A7S3 | RS12_ECOLI | * P33224 | P0A7S3 | aidb_ecoli | rs12_ecoli |
| P0A7S3 | RS12_ECOLI | * P0ACN4 | P0A7S3 | allr_ecoli | rs12_ecoli |
| P0A7S3 | RS12_ECOLI | * Q06065 | P0A7S3 | atoc_ecoli | rs12_ecoli |
| P0A7S3 | RS12_ECOLI | * P0AEM0 | P0A7S3 | fbxb_ecoli | rs12_ecoli |

|        |            |          |        |            |            |
|--------|------------|----------|--------|------------|------------|
| P0A7S3 | RS12_ECOLI | * P0A6Y5 | P0A7S3 | hslo_ecoli | rs12_ecoli |
| P0A7S3 | RS12_ECOLI | * P76086 | P0A7S3 | paax_ecoli | rs12_ecoli |
| P0A7S3 | RS12_ECOLI | * P0AFW4 | P0A7S3 | rnk_ecoli  | rs12_ecoli |
| P0A7S3 | RS12_ECOLI | * P09158 | P0A7S3 | spee_ecoli | rs12_ecoli |
| P0A7S3 | RS12_ECOLI | * P0AG24 | P0A7S3 | spot_ecoli | rs12_ecoli |
| P0A7S3 | RS12_ECOLI | * P0A847 | P0A7S3 | tgt_ecoli  | rs12_ecoli |
| P0A7S3 | RS12_ECOLI | * P0A9W0 | P0A7S3 | ular_ecoli | rs12_ecoli |
| P0A7S3 | RS12_ECOLI | * P0A8G0 | P0A7S3 | uvrc_ecoli | rs12_ecoli |
| P0A7S3 | RS12_ECOLI | * P36682 | P0A7S3 | yach_ecoli | rs12_ecoli |
| P0A7S3 | RS12_ECOLI | * P0A8E5 | P0A7S3 | yacl_ecoli | rs12_ecoli |
| P0A7S3 | RS12_ECOLI | * P0A8E5 | P0A7S3 | yacl_ecoli | rs12_ecoli |
| P0A7S3 | RS12_ECOLI | * P0AGJ5 | P0A7S3 | yfif_ecoli | rs12_ecoli |
|        |            |          |        |            |            |
| P0A7S9 | RS13_ECOLI | * P31119 | P0A7S9 | aas_ecoli  | rs13_ecoli |
| P0A7S9 | RS13_ECOLI | * P0A6A8 | P0A7S9 | acp_ecoli  | rs13_ecoli |
| P0A7S9 | RS13_ECOLI | * P22333 | P0A7S9 | add_ecoli  | rs13_ecoli |
| P0A7S9 | RS13_ECOLI | * P0ACN4 | P0A7S9 | allr_ecoli | rs13_ecoli |
| P0A7S9 | RS13_ECOLI | * P36659 | P0A7S9 | cbpa_ecoli | rs13_ecoli |
| P0A7S9 | RS13_ECOLI | * P31469 | P0A7S9 | cbrc_ecoli | rs13_ecoli |
| P0A7S9 | RS13_ECOLI | * P36995 | P0A7S9 | cspb_ecoli | rs13_ecoli |
| P0A7S9 | RS13_ECOLI | * P0A9Y6 | P0A7S9 | cspc_ecoli | rs13_ecoli |
| P0A7S9 | RS13_ECOLI | * P0A9Y6 | P0A7S9 | cspc_ecoli | rs13_ecoli |
| P0A7S9 | RS13_ECOLI | * P0A968 | P0A7S9 | cspd_ecoli | rs13_ecoli |
| P0A7S9 | RS13_ECOLI | * P0A978 | P0A7S9 | cspg_ecoli | rs13_ecoli |
| P0A7S9 | RS13_ECOLI | * P0A986 | P0A7S9 | cspi_ecoli | rs13_ecoli |
| P0A7S9 | RS13_ECOLI | * P0ACF4 | P0A7S9 | dbhb_ecoli | rs13_ecoli |
| P0A7S9 | RS13_ECOLI | * P0A9P6 | P0A7S9 | dead_ecoli | rs13_ecoli |
| P0A7S9 | RS13_ECOLI | * P0A9P6 | P0A7S9 | dead_ecoli | rs13_ecoli |
| P0A7S9 | RS13_ECOLI | * P0AEE8 | P0A7S9 | dma_ecoli  | rs13_ecoli |
| P0A7S9 | RS13_ECOLI | * P03004 | P0A7S9 | dnaa_ecoli | rs13_ecoli |
| P0A7S9 | RS13_ECOLI | * P08622 | P0A7S9 | dnaj_ecoli | rs13_ecoli |
| P0A7S9 | RS13_ECOLI | * P06616 | P0A7S9 | era_ecoli  | rs13_ecoli |
| P0A7S9 | RS13_ECOLI | * P0A6Q3 | P0A7S9 | faba_ecoli | rs13_ecoli |
| P0A7S9 | RS13_ECOLI | * P0A6R3 | P0A7S9 | fis_ecoli  | rs13_ecoli |
| P0A7S9 | RS13_ECOLI | * P26608 | P0A7S9 | flis_ecoli | rs13_ecoli |
| P0A7S9 | RS13_ECOLI | * P23882 | P0A7S9 | fmt_ecoli  | rs13_ecoli |
| P0A7S9 | RS13_ECOLI | * P39829 | P0A7S9 | gard_ecoli | rs13_ecoli |
| P0A7S9 | RS13_ECOLI | * P0A6X3 | P0A7S9 | hfq_ecoli  | rs13_ecoli |
| P0A7S9 | RS13_ECOLI | * P0A6X3 | P0A7S9 | hfq_ecoli  | rs13_ecoli |
| P0A7S9 | RS13_ECOLI | * P43329 | P0A7S9 | hrpa_ecoli | rs13_ecoli |
| P0A7S9 | RS13_ECOLI | * P0A7B8 | P0A7S9 | hslv_ecoli | rs13_ecoli |
| P0A7S9 | RS13_ECOLI | * P16528 | P0A7S9 | iclr_ecoli | rs13_ecoli |
| P0A7S9 | RS13_ECOLI | * P0A6Y1 | P0A7S9 | ihfb_ecoli | rs13_ecoli |
| P0A7S9 | RS13_ECOLI | * P27294 | P0A7S9 | inaa_ecoli | rs13_ecoli |
| P0A7S9 | RS13_ECOLI | * P32053 | P0A7S9 | inta_ecoli | rs13_ecoli |

|        |            |          |        |            |            |
|--------|------------|----------|--------|------------|------------|
| P0A7S9 | RS13_ECOLI | * P0A715 | P0A7S9 | kdsa_ecoli | rs13_ecoli |
| P0A7S9 | RS13_ECOLI | * P21645 | P0A7S9 | lpxd_ecoli | rs13_ecoli |
| P0A7S9 | RS13_ECOLI | * P77791 | P0A7S9 | maa_ecoli  | rs13_ecoli |
| P0A7S9 | RS13_ECOLI | * P30958 | P0A7S9 | mfd_ecoli  | rs13_ecoli |
| P0A7S9 | RS13_ECOLI | * P24205 | P0A7S9 | msbb_ecoli | rs13_ecoli |
| P0A7S9 | RS13_ECOLI | * P76346 | P0A7S9 | mtfa_ecoli | rs13_ecoli |
| P0A7S9 | RS13_ECOLI | * P17802 | P0A7S9 | muty_ecoli | rs13_ecoli |
| P0A7S9 | RS13_ECOLI | * P27896 | P0A7S9 | narq_ecoli | rs13_ecoli |
| P0A7S9 | RS13_ECOLI | * P68739 | P0A7S9 | nfi_ecoli  | rs13_ecoli |
| P0A7S9 | RS13_ECOLI | * P75960 | P0A7S9 | npd_ecoli  | rs13_ecoli |
| P0A7S9 | RS13_ECOLI | * P0AFI7 | P0A7S9 | pdxh_ecoli | rs13_ecoli |
| P0A7S9 | RS13_ECOLI | * P0A9K3 | P0A7S9 | phol_ecoli | rs13_ecoli |
| P0A7S9 | RS13_ECOLI | * P05055 | P0A7S9 | pnp_ecoli  | rs13_ecoli |
| P0A7S9 | RS13_ECOLI | * P05055 | P0A7S9 | pnp_ecoli  | rs13_ecoli |
| P0A7S9 | RS13_ECOLI | * P23830 | P0A7S9 | pss_ecoli  | rs13_ecoli |
| P0A7S9 | RS13_ECOLI | * P76062 | P0A7S9 | racr_ecoli | rs13_ecoli |
| P0A7S9 | RS13_ECOLI | * P69405 | P0A7S9 | rca_ecoli  | rs13_ecoli |
| P0A7S9 | RS13_ECOLI | * P24230 | P0A7S9 | recg_ecoli | rs13_ecoli |
| P0A7S9 | RS13_ECOLI | * P0AG20 | P0A7S9 | rela_ecoli | rs13_ecoli |
| P0A7S9 | RS13_ECOLI | * P24173 | P0A7S9 | rfac_ecoli | rs13_ecoli |
| P0A7S9 | RS13_ECOLI | * P0ADR6 | P0A7S9 | rlmm_ecoli | rs13_ecoli |
| P0A7S9 | RS13_ECOLI | * P37765 | P0A7S9 | rlub_ecoli | rs13_ecoli |
| P0A7S9 | RS13_ECOLI | * P0AA39 | P0A7S9 | rluc_ecoli | rs13_ecoli |
| P0A7S9 | RS13_ECOLI | * P0AA39 | P0A7S9 | rluc_ecoli | rs13_ecoli |
| P0A7S9 | RS13_ECOLI | * P0AA39 | P0A7S9 | rluc_ecoli | rs13_ecoli |
| P0A7S9 | RS13_ECOLI | * P0A9J0 | P0A7S9 | rng_ecoli  | rs13_ecoli |
| P0A7S9 | RS13_ECOLI | * P0A7Y8 | P0A7S9 | rnpa_ecoli | rs13_ecoli |
| P0A7S9 | RS13_ECOLI | * P0A7Y8 | P0A7S9 | rnpa_ecoli | rs13_ecoli |
| P0A7S9 | RS13_ECOLI | * P21499 | P0A7S9 | rnrc_ecoli | rs13_ecoli |
| P0A7S9 | RS13_ECOLI | * P21499 | P0A7S9 | rnrc_ecoli | rs13_ecoli |
| P0A7S9 | RS13_ECOLI | * P0A7Z4 | P0A7S9 | rpoa_ecoli | rs13_ecoli |
| P0A7S9 | RS13_ECOLI | * P0A8T7 | P0A7S9 | rpoc_ecoli | rs13_ecoli |
| P0A7S9 | RS13_ECOLI | * P0A800 | P0A7S9 | rpoz_ecoli | rs13_ecoli |
| P0A7S9 | RS13_ECOLI | * P0A776 | P0A7S9 | rpph_ecoli | rs13_ecoli |
| P0A7S9 | RS13_ECOLI | * P0A776 | P0A7S9 | rpph_ecoli | rs13_ecoli |
| P0A7S9 | RS13_ECOLI | * P39286 | P0A7S9 | rsga_ecoli | rs13_ecoli |
| P0A7S9 | RS13_ECOLI | * P39406 | P0A7S9 | rsmc_ecoli | rs13_ecoli |
| P0A7S9 | RS13_ECOLI | * P0AA43 | P0A7S9 | rsua_ecoli | rs13_ecoli |
| P0A7S9 | RS13_ECOLI | * P0ACU2 | P0A7S9 | rutr_ecoli | rs13_ecoli |
| P0A7S9 | RS13_ECOLI | * P0AEU7 | P0A7S9 | skp_ecoli  | rs13_ecoli |
| P0A7S9 | RS13_ECOLI | * P00960 | P0A7S9 | syga_ecoli | rs13_ecoli |
| P0A7S9 | RS13_ECOLI | * P0A8M3 | P0A7S9 | syt_ecoli  | rs13_ecoli |
| P0A7S9 | RS13_ECOLI | * P0A8I5 | P0A7S9 | trmb_ecoli | rs13_ecoli |
| P0A7S9 | RS13_ECOLI | * P17993 | P0A7S9 | ubig_ecoli | rs13_ecoli |
| P0A7S9 | RS13_ECOLI | * P0A9W0 | P0A7S9 | ular_ecoli | rs13_ecoli |

|        |            |          |        |            |            |
|--------|------------|----------|--------|------------|------------|
| P0A7S9 | RS13_ECOLI | * P0A9W0 | P0A7S9 | ular_ecoli | rs13_ecoli |
| P0A7S9 | RS13_ECOLI | * P46888 | P0A7S9 | uspc_ecoli | rs13_ecoli |
| P0A7S9 | RS13_ECOLI | * P37903 | P0A7S9 | uspf_ecoli | rs13_ecoli |
| P0A7S9 | RS13_ECOLI | * P0A8G0 | P0A7S9 | uvrc_ecoli | rs13_ecoli |
| P0A7S9 | RS13_ECOLI | * P0A8G0 | P0A7S9 | uvrc_ecoli | rs13_ecoli |
| P0A7S9 | RS13_ECOLI | * P0AED5 | P0A7S9 | uvry_ecoli | rs13_ecoli |
| P0A7S9 | RS13_ECOLI | * P71237 | P0A7S9 | wcac_ecoli | rs13_ecoli |
| P0A7S9 | RS13_ECOLI | * P71242 | P0A7S9 | wcak_ecoli | rs13_ecoli |
| P0A7S9 | RS13_ECOLI | * P0AAB2 | P0A7S9 | wzb_ecoli  | rs13_ecoli |
| P0A7S9 | RS13_ECOLI | * P0A8E5 | P0A7S9 | yacl_ecoli | rs13_ecoli |
| P0A7S9 | RS13_ECOLI | * P75829 | P0A7S9 | ybjx_ecoli | rs13_ecoli |
| P0A7S9 | RS13_ECOLI | * P0AB06 | P0A7S9 | ycbk_ecoli | rs13_ecoli |
| P0A7S9 | RS13_ECOLI | * P0ACX9 | P0A7S9 | ydie_ecoli | rs13_ecoli |
| P0A7S9 | RS13_ECOLI | * P0AD05 | P0A7S9 | yeca_ecoli | rs13_ecoli |
| P0A7S9 | RS13_ECOLI | * P0A959 | P0A7S9 | yfbq_ecoli | rs13_ecoli |
| P0A7S9 | RS13_ECOLI | * P77775 | P0A7S9 | yfch_ecoli | rs13_ecoli |
| P0A7S9 | RS13_ECOLI | * P0AGJ5 | P0A7S9 | yfif_ecoli | rs13_ecoli |
| P0A7S9 | RS13_ECOLI | * P0AGJ5 | P0A7S9 | yfif_ecoli | rs13_ecoli |
| P0A7S9 | RS13_ECOLI | * P76594 | P0A7S9 | yfiq_ecoli | rs13_ecoli |
| P0A7S9 | RS13_ECOLI | * P09996 | P0A7S9 | yidb_ecoli | rs13_ecoli |
| P0A7S9 | RS13_ECOLI | * P32162 | P0A7S9 | yiis_ecoli | rs13_ecoli |
| P0A7S9 | RS13_ECOLI | * P39407 | P0A7S9 | yjju_ecoli | rs13_ecoli |
| P0A7S9 | RS13_ECOLI | * P76148 | P0A7S9 | yneg_ecoli | rs13_ecoli |
| P0A7S9 | RS13_ECOLI | * P76280 | P0A7S9 | yobb_ecoli | rs13_ecoli |
|        |            |          |        |            |            |
| P0AG59 | RS14_ECOLI | * P33224 | P0AG59 | aidb_ecoli | rs14_ecoli |
| P0AG59 | RS14_ECOLI | * P0ACN4 | P0AG59 | allr_ecoli | rs14_ecoli |
| P0AG59 | RS14_ECOLI | * P06709 | P0AG59 | bira_ecoli | rs14_ecoli |
| P0AG59 | RS14_ECOLI | * P0ABH9 | P0AG59 | clpa_ecoli | rs14_ecoli |
| P0AG59 | RS14_ECOLI | * P63284 | P0AG59 | clpb_ecoli | rs14_ecoli |
| P0AG59 | RS14_ECOLI | * P0A9X9 | P0AG59 | cspa_ecoli | rs14_ecoli |
| P0AG59 | RS14_ECOLI | * P0A9Y6 | P0AG59 | cspc_ecoli | rs14_ecoli |
| P0AG59 | RS14_ECOLI | * P0A968 | P0AG59 | cspd_ecoli | rs14_ecoli |
| P0AG59 | RS14_ECOLI | * P0AED9 | P0AG59 | dcm_ecoli  | rs14_ecoli |
| P0AG59 | RS14_ECOLI | * P0A9P6 | P0AG59 | dead_ecoli | rs14_ecoli |
| P0AG59 | RS14_ECOLI | * P03004 | P0AG59 | dnaa_ecoli | rs14_ecoli |
| P0AG59 | RS14_ECOLI | * P08622 | P0AG59 | dnaj_ecoli | rs14_ecoli |
| P0AG59 | RS14_ECOLI | * P0ADH5 | P0AG59 | fimb_ecoli | rs14_ecoli |
| P0AG59 | RS14_ECOLI | * P0AEM0 | P0AG59 | fbkx_ecoli | rs14_ecoli |
| P0AG59 | RS14_ECOLI | * P28905 | P0AG59 | holc_ecoli | rs14_ecoli |
| P0AG59 | RS14_ECOLI | * P0A6L9 | P0AG59 | hscb_ecoli | rs14_ecoli |
| P0AG59 | RS14_ECOLI | * P16528 | P0AG59 | iclr_ecoli | rs14_ecoli |
| P0AG59 | RS14_ECOLI | * P32053 | P0AG59 | inta_ecoli | rs14_ecoli |
| P0AG59 | RS14_ECOLI | * P0A7A9 | P0AG59 | ipyr_ecoli | rs14_ecoli |
| P0AG59 | RS14_ECOLI | * P0A715 | P0AG59 | kdsa_ecoli | rs14_ecoli |



|        |            |          |        |            |            |
|--------|------------|----------|--------|------------|------------|
| P0AG59 | RS14_ECOLI | * P0ACE0 | P0AG59 | mbhm_ecoli | rs14_ecoli |
| P0AG59 | RS14_ECOLI | * P0ABU0 | P0AG59 | menb_ecoli | rs14_ecoli |
| P0AG59 | RS14_ECOLI | * P25522 | P0AG59 | mnme_ecoli | rs14_ecoli |
| P0AG59 | RS14_ECOLI | * P33937 | P0AG59 | napa_ecoli | rs14_ecoli |
| P0AG59 | RS14_ECOLI | * P68739 | P0AG59 | nfi_ecoli  | rs14_ecoli |
| P0AG59 | RS14_ECOLI | * P75960 | P0AG59 | npd_ecoli  | rs14_ecoli |
| P0AG59 | RS14_ECOLI | * P75960 | P0AG59 | npd_ecoli  | rs14_ecoli |
| P0AG59 | RS14_ECOLI | * P0AFG0 | P0AG59 | nusg_ecoli | rs14_ecoli |
| P0AG59 | RS14_ECOLI | * P0A799 | P0AG59 | pgk_ecoli  | rs14_ecoli |
| P0AG59 | RS14_ECOLI | * P0A9K3 | P0AG59 | phol_ecoli | rs14_ecoli |
| P0AG59 | RS14_ECOLI | * P23830 | P0AG59 | pss_ecoli  | rs14_ecoli |
| P0AG59 | RS14_ECOLI | * P69405 | P0AG59 | rca_ecoli  | rs14_ecoli |
| P0AG59 | RS14_ECOLI | * P15043 | P0AG59 | recq_ecoli | rs14_ecoli |
| P0AG59 | RS14_ECOLI | * P36979 | P0AG59 | rlmn_ecoli | rs14_ecoli |
| P0AG59 | RS14_ECOLI | * P37765 | P0AG59 | rlub_ecoli | rs14_ecoli |
| P0AG59 | RS14_ECOLI | * P0AA39 | P0AG59 | rluc_ecoli | rs14_ecoli |
| P0AG59 | RS14_ECOLI | * P0A7Y4 | P0AG59 | rnh_ecoli  | rs14_ecoli |
| P0AG59 | RS14_ECOLI | * P0AFW4 | P0AG59 | rnk_ecoli  | rs14_ecoli |
| P0AG59 | RS14_ECOLI | * P0A7Y8 | P0AG59 | rnpa_ecoli | rs14_ecoli |
| P0AG59 | RS14_ECOLI | * P21499 | P0AG59 | rnrc_ecoli | rs14_ecoli |
| P0AG59 | RS14_ECOLI | * P0A7Z4 | P0AG59 | rpoa_ecoli | rs14_ecoli |
| P0AG59 | RS14_ECOLI | * P0A8V2 | P0AG59 | rpob_ecoli | rs14_ecoli |
| P0AG59 | RS14_ECOLI | * P39286 | P0AG59 | rsga_ecoli | rs14_ecoli |
| P0AG59 | RS14_ECOLI | * P0AG24 | P0AG59 | spot_ecoli | rs14_ecoli |
| P0AG59 | RS14_ECOLI | * P0A832 | P0AG59 | ssrp_ecoli | rs14_ecoli |
| P0AG59 | RS14_ECOLI | * P0ABZ6 | P0AG59 | sura_ecoli | rs14_ecoli |
| P0AG59 | RS14_ECOLI | * P0A8M3 | P0AG59 | syt_ecoli  | rs14_ecoli |
| P0AG59 | RS14_ECOLI | * P0A847 | P0AG59 | tgt_ecoli  | rs14_ecoli |
| P0AG59 | RS14_ECOLI | * P0A850 | P0AG59 | tig_ecoli  | rs14_ecoli |
| P0AG59 | RS14_ECOLI | * P0A9W0 | P0AG59 | ular_ecoli | rs14_ecoli |
| P0AG59 | RS14_ECOLI | * P0A8G0 | P0AG59 | uvrc_ecoli | rs14_ecoli |
| P0AG59 | RS14_ECOLI | * P03018 | P0AG59 | uvrd_ecoli | rs14_ecoli |
| P0AG59 | RS14_ECOLI | * P0A8E5 | P0AG59 | yacl_ecoli | rs14_ecoli |
| P0AG59 | RS14_ECOLI | * P76104 | P0AG59 | ydcp_ecoli | rs14_ecoli |
| P0AG59 | RS14_ECOLI | * P0A8A0 | P0AG59 | yebc_ecoli | rs14_ecoli |
| P0AG59 | RS14_ECOLI | * P0AD05 | P0AG59 | yeca_ecoli | rs14_ecoli |
| P0AG59 | RS14_ECOLI | * P0AGJ5 | P0AG59 | yfif_ecoli | rs14_ecoli |
| P0AG59 | RS14_ECOLI | * P76594 | P0AG59 | yfiq_ecoli | rs14_ecoli |
| P0AG59 | RS14_ECOLI | * P0A894 | P0AG59 | yhbj_ecoli | rs14_ecoli |
| P0AG59 | RS14_ECOLI | * P0ADK8 | P0AG59 | yibl_ecoli | rs14_ecoli |
| P0ADZ4 | RS15_ECOLI | * P0ACN4 | P0ADZ4 | allr_ecoli | rs15_ecoli |
| P0ADZ4 | RS15_ECOLI | * P0AE60 | P0ADZ4 | ceda_ecoli | rs15_ecoli |
| P0ADZ4 | RS15_ECOLI | * P0A9P6 | P0ADZ4 | dead_ecoli | rs15_ecoli |
| P0ADZ4 | RS15_ECOLI | * P63228 | P0ADZ4 | gmhb_ecoli | rs15_ecoli |



|        |            |          |        |            |            |
|--------|------------|----------|--------|------------|------------|
| P0ADZ4 | RS15_ECOLI | * P0AET8 | P0ADZ4 | hdha_ecoli | rs15_ecoli |
| P0ADZ4 | RS15_ECOLI | * P68739 | P0ADZ4 | nfi_ecoli  | rs15_ecoli |
| P0ADZ4 | RS15_ECOLI | * P05055 | P0ADZ4 | pnp_ecoli  | rs15_ecoli |
| P0ADZ4 | RS15_ECOLI | * P0A9J0 | P0ADZ4 | rng_ecoli  | rs15_ecoli |
| P0ADZ4 | RS15_ECOLI | * P0A7Y8 | P0ADZ4 | rnpa_ecoli | rs15_ecoli |
| P0ADZ4 | RS15_ECOLI | * P21499 | P0ADZ4 | rnrc_ecoli | rs15_ecoli |
| P0ADZ4 | RS15_ECOLI | * P0A7Z4 | P0ADZ4 | rpoa_ecoli | rs15_ecoli |
| P0ADZ4 | RS15_ECOLI | * P0A8G0 | P0ADZ4 | uvrc_ecoli | rs15_ecoli |
| P0ADZ4 | RS15_ECOLI | * P76164 | P0ADZ4 | ydfw_ecoli | rs15_ecoli |
| P0ADZ4 | RS15_ECOLI | * P0AGJ5 | P0ADZ4 | yfif_ecoli | rs15_ecoli |
| P0ADZ4 | RS15_ECOLI | * P67701 | P0ADZ4 | ygjm_ecoli | rs15_ecoli |
|        |            |          |        |            |            |
| P0A7T3 | RS16_ECOLI | * P0AE18 | P0A7T3 | ampm_ecoli | rs16_ecoli |
| P0A7T3 | RS16_ECOLI | * P36659 | P0A7T3 | cbpa_ecoli | rs16_ecoli |
| P0A7T3 | RS16_ECOLI | * P0ABH9 | P0A7T3 | clpa_ecoli | rs16_ecoli |
| P0A7T3 | RS16_ECOLI | * P0A6G7 | P0A7T3 | clpp_ecoli | rs16_ecoli |
| P0A7T3 | RS16_ECOLI | * P0A972 | P0A7T3 | cspe_ecoli | rs16_ecoli |
| P0A7T3 | RS16_ECOLI | * P0A9P6 | P0A7T3 | dead_ecoli | rs16_ecoli |
| P0A7T3 | RS16_ECOLI | * P0ADH5 | P0A7T3 | fimb_ecoli | rs16_ecoli |
| P0A7T3 | RS16_ECOLI | * P0A9R7 | P0A7T3 | ftse_ecoli | rs16_ecoli |
| P0A7T3 | RS16_ECOLI | * P0A6X3 | P0A7T3 | hfq_ecoli  | rs16_ecoli |
| P0A7T3 | RS16_ECOLI | * P28631 | P0A7T3 | holb_ecoli | rs16_ecoli |
| P0A7T3 | RS16_ECOLI | * P0ABS8 | P0A7T3 | hole_ecoli | rs16_ecoli |
| P0A7T3 | RS16_ECOLI | * P0A7B8 | P0A7T3 | hslv_ecoli | rs16_ecoli |
| P0A7T3 | RS16_ECOLI | * P32053 | P0A7T3 | inta_ecoli | rs16_ecoli |
| P0A7T3 | RS16_ECOLI | * P21645 | P0A7T3 | lpxd_ecoli | rs16_ecoli |
| P0A7T3 | RS16_ECOLI | * P22523 | P0A7T3 | mukb_ecoli | rs16_ecoli |
| P0A7T3 | RS16_ECOLI | * P0AFG0 | P0A7T3 | nusg_ecoli | rs16_ecoli |
| P0A7T3 | RS16_ECOLI | * P0A9K3 | P0A7T3 | phol_ecoli | rs16_ecoli |
| P0A7T3 | RS16_ECOLI | * P0A7E9 | P0A7T3 | pyrh_ecoli | rs16_ecoli |
| P0A7T3 | RS16_ECOLI | * P31473 | P0A7T3 | rava_ecoli | rs16_ecoli |
| P0A7T3 | RS16_ECOLI | * P21893 | P0A7T3 | recj_ecoli | rs16_ecoli |
| P0A7T3 | RS16_ECOLI | * P0A8J8 | P0A7T3 | rhlb_ecoli | rs16_ecoli |
| P0A7T3 | RS16_ECOLI | * P45748 | P0A7T3 | rimn_ecoli | rs16_ecoli |
| P0A7T3 | RS16_ECOLI | * P36979 | P0A7T3 | rlmn_ecoli | rs16_ecoli |
| P0A7T3 | RS16_ECOLI | * P37765 | P0A7T3 | rlub_ecoli | rs16_ecoli |
| P0A7T3 | RS16_ECOLI | * P0AA39 | P0A7T3 | rluc_ecoli | rs16_ecoli |
| P0A7T3 | RS16_ECOLI | * P21513 | P0A7T3 | rne_ecoli  | rs16_ecoli |
| P0A7T3 | RS16_ECOLI | * P0A7Y8 | P0A7T3 | rnpa_ecoli | rs16_ecoli |
| P0A7T3 | RS16_ECOLI | * P21499 | P0A7T3 | rnrc_ecoli | rs16_ecoli |
| P0A7T3 | RS16_ECOLI | * P21499 | P0A7T3 | rnrc_ecoli | rs16_ecoli |
| P0A7T3 | RS16_ECOLI | * P0A7Z4 | P0A7T3 | rpoa_ecoli | rs16_ecoli |
| P0A7T3 | RS16_ECOLI | * P0A8T7 | P0A7T3 | rpoc_ecoli | rs16_ecoli |
| P0A7T3 | RS16_ECOLI | * P39286 | P0A7T3 | rsga_ecoli | rs16_ecoli |
| P0A7T3 | RS16_ECOLI | * P0AA43 | P0A7T3 | rsua_ecoli | rs16_ecoli |

|        |            |          |        |            |            |
|--------|------------|----------|--------|------------|------------|
| P0A7T3 | RS16_ECOLI | * P0AG24 | P0A7T3 | spot_ecoli | rs16_ecoli |
| P0A7T3 | RS16_ECOLI | * P00960 | P0A7T3 | syga_ecoli | rs16_ecoli |
| P0A7T3 | RS16_ECOLI | * P07813 | P0A7T3 | syl_ecoli  | rs16_ecoli |
| P0A7T3 | RS16_ECOLI | * P0A8I5 | P0A7T3 | trmb_ecoli | rs16_ecoli |
| P0A7T3 | RS16_ECOLI | * P0AGJ5 | P0A7T3 | yfif_ecoli | rs16_ecoli |
| P0A7T3 | RS16_ECOLI | * P23839 | P0A7T3 | yicc_ecoli | rs16_ecoli |
| P0AG63 | RS17_ECOLI | none     |        |            |            |
| P0A7T7 | RS18_ECOLI | * P0A9P6 | P0A7T7 | dead_ecoli | rs18_ecoli |
| P0A7T7 | RS18_ECOLI | * P0A6Q3 | P0A7T7 | faba_ecoli | rs18_ecoli |
| P0A7T7 | RS18_ECOLI | * P0ADH5 | P0A7T7 | fimb_ecoli | rs18_ecoli |
| P0A7T7 | RS18_ECOLI | * P0A6X3 | P0A7T7 | hfq_ecoli  | rs18_ecoli |
| P0A7T7 | RS18_ECOLI | * P21645 | P0A7T7 | lpxd_ecoli | rs18_ecoli |
| P0A7T7 | RS18_ECOLI | * P21645 | P0A7T7 | lpxd_ecoli | rs18_ecoli |
| P0A7T7 | RS18_ECOLI | * P68739 | P0A7T7 | nfi_ecoli  | rs18_ecoli |
| P0A7T7 | RS18_ECOLI | * P05055 | P0A7T7 | pnp_ecoli  | rs18_ecoli |
| P0A7T7 | RS18_ECOLI | * P25888 | P0A7T7 | rhle_ecoli | rs18_ecoli |
| P0A7T7 | RS18_ECOLI | * P36979 | P0A7T7 | rlmn_ecoli | rs18_ecoli |
| P0A7T7 | RS18_ECOLI | * P37765 | P0A7T7 | rlub_ecoli | rs18_ecoli |
| P0A7T7 | RS18_ECOLI | * P0AA39 | P0A7T7 | rluc_ecoli | rs18_ecoli |
| P0A7T7 | RS18_ECOLI | * P0A7Y8 | P0A7T7 | rnpa_ecoli | rs18_ecoli |
| P0A7T7 | RS18_ECOLI | * P21499 | P0A7T7 | rnrc_ecoli | rs18_ecoli |
| P0A7T7 | RS18_ECOLI | * P0A776 | P0A7T7 | rpph_ecoli | rs18_ecoli |
| P0A7T7 | RS18_ECOLI | * P0AG24 | P0A7T7 | spot_ecoli | rs18_ecoli |
| P0A7T7 | RS18_ECOLI | * P0A8G0 | P0A7T7 | uvrc_ecoli | rs18_ecoli |
| P0A7T7 | RS18_ECOLI | * P77634 | P0A7T7 | ybcm_ecoli | rs18_ecoli |
| P0A7T7 | RS18_ECOLI | * P0AGJ5 | P0A7T7 | yfif_ecoli | rs18_ecoli |
| P0A7U3 | RS19_ECOLI | * P33224 | P0A7U3 | aidb_ecoli | rs19_ecoli |
| P0A7U3 | RS19_ECOLI | * P07363 | P0A7U3 | chea_ecoli | rs19_ecoli |
| P0A7U3 | RS19_ECOLI | * P0A9P6 | P0A7U3 | dead_ecoli | rs19_ecoli |
| P0A7U3 | RS19_ECOLI | * P0AES4 | P0A7U3 | gyra_ecoli | rs19_ecoli |
| P0A7U3 | RS19_ECOLI | * P43329 | P0A7U3 | hrpa_ecoli | rs19_ecoli |
| P0A7U3 | RS19_ECOLI | * P0A6Y1 | P0A7U3 | ihfb_ecoli | rs19_ecoli |
| P0A7U3 | RS19_ECOLI | * P37590 | P0A7U3 | pmrd_ecoli | rs19_ecoli |
| P0A7U3 | RS19_ECOLI | * P05055 | P0A7U3 | pnp_ecoli  | rs19_ecoli |
| P0A7U3 | RS19_ECOLI | * P0A8J8 | P0A7U3 | rhlb_ecoli | rs19_ecoli |
| P0A7U3 | RS19_ECOLI | * P0A9J0 | P0A7U3 | rng_ecoli  | rs19_ecoli |
| P0A7U3 | RS19_ECOLI | * P0A7Z4 | P0A7U3 | rpoa_ecoli | rs19_ecoli |
| P0A7U3 | RS19_ECOLI | * P0A776 | P0A7U3 | rpph_ecoli | rs19_ecoli |
| P0A7U3 | RS19_ECOLI | * P0A850 | P0A7U3 | tig_ecoli  | rs19_ecoli |
| P0A7U3 | RS19_ECOLI | * P0A9W0 | P0A7U3 | ular_ecoli | rs19_ecoli |
| P0A7U3 | RS19_ECOLI | * P0A8G0 | P0A7U3 | uvrc_ecoli | rs19_ecoli |
| P0A7U3 | RS19_ECOLI | * P75829 | P0A7U3 | ybjx_ecoli | rs19_ecoli |

|        |            |          |        |            |            |
|--------|------------|----------|--------|------------|------------|
| P0A7U3 | RS19_ECOLI | * P0AGJ5 | P0A7U3 | yfif_ecoli | rs19_ecoli |
| P0A7U3 | RS19_ECOLI | * P76594 | P0A7U3 | yfiq_ecoli | rs19_ecoli |
| P0A7V0 | RS2_ECOLI  | * P0A9Q7 | P0A7V0 | adhe_ecoli | rs2_ecoli  |
| P0A7V0 | RS2_ECOLI  | * P33224 | P0A7V0 | aidb_ecoli | rs2_ecoli  |
| P0A7V0 | RS2_ECOLI  | * P0AB71 | P0A7V0 | alf_ecoli  | rs2_ecoli  |
| P0A7V0 | RS2_ECOLI  | * P0AE18 | P0A7V0 | ampm_ecoli | rs2_ecoli  |
| P0A7V0 | RS2_ECOLI  | * P0ABB4 | P0A7V0 | atpb_ecoli | rs2_ecoli  |
| P0A7V0 | RS2_ECOLI  | * P06610 | P0A7V0 | btue_ecoli | rs2_ecoli  |
| P0A7V0 | RS2_ECOLI  | * P0A9H5 | P0A7V0 | btur_ecoli | rs2_ecoli  |
| P0A7V0 | RS2_ECOLI  | * P36659 | P0A7V0 | cbpa_ecoli | rs2_ecoli  |
| P0A7V0 | RS2_ECOLI  | * P36659 | P0A7V0 | cbpa_ecoli | rs2_ecoli  |
| P0A7V0 | RS2_ECOLI  | * P06961 | P0A7V0 | cca_ecoli  | rs2_ecoli  |
| P0A7V0 | RS2_ECOLI  | * P0A964 | P0A7V0 | chew_ecoli | rs2_ecoli  |
| P0A7V0 | RS2_ECOLI  | * P0AE67 | P0A7V0 | chey_ecoli | rs2_ecoli  |
| P0A7V0 | RS2_ECOLI  | * P0ABH9 | P0A7V0 | clpa_ecoli | rs2_ecoli  |
| P0A7V0 | RS2_ECOLI  | * P0ABH9 | P0A7V0 | clpa_ecoli | rs2_ecoli  |
| P0A7V0 | RS2_ECOLI  | * P63284 | P0A7V0 | clpb_ecoli | rs2_ecoli  |
| P0A7V0 | RS2_ECOLI  | * P0A6G7 | P0A7V0 | clpp_ecoli | rs2_ecoli  |
| P0A7V0 | RS2_ECOLI  | * P36995 | P0A7V0 | cspb_ecoli | rs2_ecoli  |
| P0A7V0 | RS2_ECOLI  | * P0A9Y6 | P0A7V0 | cspc_ecoli | rs2_ecoli  |
| P0A7V0 | RS2_ECOLI  | * P0A9Y6 | P0A7V0 | cspc_ecoli | rs2_ecoli  |
| P0A7V0 | RS2_ECOLI  | * P0A968 | P0A7V0 | cspd_ecoli | rs2_ecoli  |
| P0A7V0 | RS2_ECOLI  | * P0A968 | P0A7V0 | cspd_ecoli | rs2_ecoli  |
| P0A7V0 | RS2_ECOLI  | * P0A978 | P0A7V0 | cspg_ecoli | rs2_ecoli  |
| P0A7V0 | RS2_ECOLI  | * P69488 | P0A7V0 | cuta_ecoli | rs2_ecoli  |
| P0A7V0 | RS2_ECOLI  | * P37195 | P0A7V0 | dctr_ecoli | rs2_ecoli  |
| P0A7V0 | RS2_ECOLI  | * P0A9P6 | P0A7V0 | dead_ecoli | rs2_ecoli  |
| P0A7V0 | RS2_ECOLI  | * P0A9P6 | P0A7V0 | dead_ecoli | rs2_ecoli  |
| P0A7V0 | RS2_ECOLI  | * P0A6P5 | P0A7V0 | der_ecoli  | rs2_ecoli  |
| P0A7V0 | RS2_ECOLI  | * P76250 | P0A7V0 | dmlr_ecoli | rs2_ecoli  |
| P0A7V0 | RS2_ECOLI  | * P03004 | P0A7V0 | dnaa_ecoli | rs2_ecoli  |
| P0A7V0 | RS2_ECOLI  | * P03004 | P0A7V0 | dnaa_ecoli | rs2_ecoli  |
| P0A7V0 | RS2_ECOLI  | * P0ACB0 | P0A7V0 | dnab_ecoli | rs2_ecoli  |
| P0A7V0 | RS2_ECOLI  | * P0ACB0 | P0A7V0 | dnab_ecoli | rs2_ecoli  |
| P0A7V0 | RS2_ECOLI  | * P08622 | P0A7V0 | dnaj_ecoli | rs2_ecoli  |
| P0A7V0 | RS2_ECOLI  | * P0A6Y8 | P0A7V0 | dnak_ecoli | rs2_ecoli  |
| P0A7V0 | RS2_ECOLI  | * P0A6Y8 | P0A7V0 | dnak_ecoli | rs2_ecoli  |
| P0A7V0 | RS2_ECOLI  | * P15042 | P0A7V0 | dnlj_ecoli | rs2_ecoli  |
| P0A7V0 | RS2_ECOLI  | * P0AEG4 | P0A7V0 | dsba_ecoli | rs2_ecoli  |
| P0A7V0 | RS2_ECOLI  | * P33371 | P0A7V0 | dusc_ecoli | rs2_ecoli  |
| P0A7V0 | RS2_ECOLI  | * P0ADF6 | P0A7V0 | edd_ecoli  | rs2_ecoli  |
| P0A7V0 | RS2_ECOLI  | * P06616 | P0A7V0 | era_ecoli  | rs2_ecoli  |
| P0A7V0 | RS2_ECOLI  | * P0ACC3 | P0A7V0 | erpa_ecoli | rs2_ecoli  |
| P0A7V0 | RS2_ECOLI  | * P0A6Q3 | P0A7V0 | faba_ecoli | rs2_ecoli  |

|        |           |          |        |            |           |
|--------|-----------|----------|--------|------------|-----------|
| P0A7V0 | RS2_ECOLI | * P0A6Q6 | P0A7V0 | fabz_ecoli | rs2_ecoli |
| P0A7V0 | RS2_ECOLI | * P32177 | P0A7V0 | fdhd_ecoli | rs2_ecoli |
| P0A7V0 | RS2_ECOLI | * P0A6R3 | P0A7V0 | fis_ecoli  | rs2_ecoli |
| P0A7V0 | RS2_ECOLI | * P0AEM0 | P0A7V0 | fkbx_ecoli | rs2_ecoli |
| P0A7V0 | RS2_ECOLI | * P61949 | P0A7V0 | flav_ecoli | rs2_ecoli |
| P0A7V0 | RS2_ECOLI | * P33235 | P0A7V0 | flgk_ecoli | rs2_ecoli |
| P0A7V0 | RS2_ECOLI | * P31068 | P0A7V0 | flih_ecoli | rs2_ecoli |
| P0A7V0 | RS2_ECOLI | * P0ABX8 | P0A7V0 | flii_ecoli | rs2_ecoli |
| P0A7V0 | RS2_ECOLI | * P32153 | P0A7V0 | frvx_ecoli | rs2_ecoli |
| P0A7V0 | RS2_ECOLI | * P0ABH0 | P0A7V0 | ftsa_ecoli | rs2_ecoli |
| P0A7V0 | RS2_ECOLI | * P0A9R7 | P0A7V0 | ftse_ecoli | rs2_ecoli |
| P0A7V0 | RS2_ECOLI | * P0A9A6 | P0A7V0 | ftsz_ecoli | rs2_ecoli |
| P0A7V0 | RS2_ECOLI | * P0A9S3 | P0A7V0 | gatd_ecoli | rs2_ecoli |
| P0A7V0 | RS2_ECOLI | * P31120 | P0A7V0 | glmm_ecoli | rs2_ecoli |
| P0A7V0 | RS2_ECOLI | * P0ACC7 | P0A7V0 | glmu_ecoli | rs2_ecoli |
| P0A7V0 | RS2_ECOLI | * P0A9Z1 | P0A7V0 | glnb_ecoli | rs2_ecoli |
| P0A7V0 | RS2_ECOLI | * P0A6W5 | P0A7V0 | grea_ecoli | rs2_ecoli |
| P0A7V0 | RS2_ECOLI | * P30128 | P0A7V0 | greb_ecoli | rs2_ecoli |
| P0A7V0 | RS2_ECOLI | * P09372 | P0A7V0 | grpe_ecoli | rs2_ecoli |
| P0A7V0 | RS2_ECOLI | * P0AES4 | P0A7V0 | gyra_ecoli | rs2_ecoli |
| P0A7V0 | RS2_ECOLI | * P0AES4 | P0A7V0 | gyra_ecoli | rs2_ecoli |
| P0A7V0 | RS2_ECOLI | * P0AES6 | P0A7V0 | gyrb_ecoli | rs2_ecoli |
| P0A7V0 | RS2_ECOLI | * P69931 | P0A7V0 | hda_ecoli  | rs2_ecoli |
| P0A7V0 | RS2_ECOLI | * P0A6X3 | P0A7V0 | hfq_ecoli  | rs2_ecoli |
| P0A7V0 | RS2_ECOLI | * P0A6X3 | P0A7V0 | hfq_ecoli  | rs2_ecoli |
| P0A7V0 | RS2_ECOLI | * P0ACF8 | P0A7V0 | hns_ecoli  | rs2_ecoli |
| P0A7V0 | RS2_ECOLI | * P0ACF8 | P0A7V0 | hns_ecoli  | rs2_ecoli |
| P0A7V0 | RS2_ECOLI | * P28905 | P0A7V0 | holc_ecoli | rs2_ecoli |
| P0A7V0 | RS2_ECOLI | * P0ABS8 | P0A7V0 | hole_ecoli | rs2_ecoli |
| P0A7V0 | RS2_ECOLI | * P43329 | P0A7V0 | hrpa_ecoli | rs2_ecoli |
| P0A7V0 | RS2_ECOLI | * P0A6L9 | P0A7V0 | hscb_ecoli | rs2_ecoli |
| P0A7V0 | RS2_ECOLI | * P77319 | P0A7V0 | hscd_ecoli | rs2_ecoli |
| P0A7V0 | RS2_ECOLI | * P77319 | P0A7V0 | hscd_ecoli | rs2_ecoli |
| P0A7V0 | RS2_ECOLI | * P0A6Y5 | P0A7V0 | hslo_ecoli | rs2_ecoli |
| P0A7V0 | RS2_ECOLI | * P0ACG8 | P0A7V0 | hslr_ecoli | rs2_ecoli |
| P0A7V0 | RS2_ECOLI | * P0ACG8 | P0A7V0 | hslr_ecoli | rs2_ecoli |
| P0A7V0 | RS2_ECOLI | * P0A6H5 | P0A7V0 | hslu_ecoli | rs2_ecoli |
| P0A7V0 | RS2_ECOLI | * P0C054 | P0A7V0 | ibpa_ecoli | rs2_ecoli |
| P0A7V0 | RS2_ECOLI | * P16528 | P0A7V0 | iclr_ecoli | rs2_ecoli |
| P0A7V0 | RS2_ECOLI | * P0A6X7 | P0A7V0 | ihfa_ecoli | rs2_ecoli |
| P0A7V0 | RS2_ECOLI | * P08142 | P0A7V0 | ilvb_ecoli | rs2_ecoli |
| P0A7V0 | RS2_ECOLI | * P0A7A9 | P0A7V0 | ipyr_ecoli | rs2_ecoli |
| P0A7V0 | RS2_ECOLI | * P22939 | P0A7V0 | ispa_ecoli | rs2_ecoli |
| P0A7V0 | RS2_ECOLI | * P0A715 | P0A7V0 | kdsa_ecoli | rs2_ecoli |
| P0A7V0 | RS2_ECOLI | * P0AC75 | P0A7V0 | kdta_ecoli | rs2_ecoli |

|        |           |          |        |            |           |
|--------|-----------|----------|--------|------------|-----------|
| P0A7V0 | RS2_ECOLI | * P0A9H3 | P0A7V0 | ldci_ecoli | rs2_ecoli |
| P0A7V0 | RS2_ECOLI | * P60785 | P0A7V0 | lepa_ecoli | rs2_ecoli |
| P0A7V0 | RS2_ECOLI | * P33232 | P0A7V0 | lidd_ecoli | rs2_ecoli |
| P0A7V0 | RS2_ECOLI | * P0A9M0 | P0A7V0 | lon_ecoli  | rs2_ecoli |
| P0A7V0 | RS2_ECOLI | * P0A722 | P0A7V0 | lpxa_ecoli | rs2_ecoli |
| P0A7V0 | RS2_ECOLI | * P10441 | P0A7V0 | lpxb_ecoli | rs2_ecoli |
| P0A7V0 | RS2_ECOLI | * P21645 | P0A7V0 | lpxd_ecoli | rs2_ecoli |
| P0A7V0 | RS2_ECOLI | * P21645 | P0A7V0 | lpxd_ecoli | rs2_ecoli |
| P0A7V0 | RS2_ECOLI | * P0ACE0 | P0A7V0 | mbhm_ecoli | rs2_ecoli |
| P0A7V0 | RS2_ECOLI | * P0ACE0 | P0A7V0 | mbhm_ecoli | rs2_ecoli |
| P0A7V0 | RS2_ECOLI | * P18196 | P0A7V0 | minc_ecoli | rs2_ecoli |
| P0A7V0 | RS2_ECOLI | * P0ADV7 | P0A7V0 | mlac_ecoli | rs2_ecoli |
| P0A7V0 | RS2_ECOLI | * P25522 | P0A7V0 | mnme_ecoli | rs2_ecoli |
| P0A7V0 | RS2_ECOLI | * P25522 | P0A7V0 | mnme_ecoli | rs2_ecoli |
| P0A7V0 | RS2_ECOLI | * P25738 | P0A7V0 | msyb_ecoli | rs2_ecoli |
| P0A7V0 | RS2_ECOLI | * P22523 | P0A7V0 | mukb_ecoli | rs2_ecoli |
| P0A7V0 | RS2_ECOLI | * P22523 | P0A7V0 | mukb_ecoli | rs2_ecoli |
| P0A7V0 | RS2_ECOLI | * P0A749 | P0A7V0 | mura_ecoli | rs2_ecoli |
| P0A7V0 | RS2_ECOLI | * P17952 | P0A7V0 | murc_ecoli | rs2_ecoli |
| P0A7V0 | RS2_ECOLI | * P22188 | P0A7V0 | mure_ecoli | rs2_ecoli |
| P0A7V0 | RS2_ECOLI | * P17443 | P0A7V0 | murg_ecoli | rs2_ecoli |
| P0A7V0 | RS2_ECOLI | * P22634 | P0A7V0 | muri_ecoli | rs2_ecoli |
| P0A7V0 | RS2_ECOLI | * P0A9I5 | P0A7V0 | napd_ecoli | rs2_ecoli |
| P0A7V0 | RS2_ECOLI | * P0A780 | P0A7V0 | nusb_ecoli | rs2_ecoli |
| P0A7V0 | RS2_ECOLI | * P0AFG0 | P0A7V0 | nusg_ecoli | rs2_ecoli |
| P0A7V0 | RS2_ECOLI | * P0AFI2 | P0A7V0 | parc_ecoli | rs2_ecoli |
| P0A7V0 | RS2_ECOLI | * P20083 | P0A7V0 | pare_ecoli | rs2_ecoli |
| P0A7V0 | RS2_ECOLI | * P0A9K3 | P0A7V0 | phol_ecoli | rs2_ecoli |
| P0A7V0 | RS2_ECOLI | * P0A9K3 | P0A7V0 | phol_ecoli | rs2_ecoli |
| P0A7V0 | RS2_ECOLI | * P0A7A7 | P0A7V0 | plsb_ecoli | rs2_ecoli |
| P0A7V0 | RS2_ECOLI | * P18133 | P0A7V0 | pncb_ecoli | rs2_ecoli |
| P0A7V0 | RS2_ECOLI | * P0A8T1 | P0A7V0 | prma_ecoli | rs2_ecoli |
| P0A7V0 | RS2_ECOLI | * P23830 | P0A7V0 | pss_ecoli  | rs2_ecoli |
| P0A7V0 | RS2_ECOLI | * P0A7D1 | P0A7V0 | pth_ecoli  | rs2_ecoli |
| P0A7V0 | RS2_ECOLI | * P0A7D1 | P0A7V0 | pth_ecoli  | rs2_ecoli |
| P0A7V0 | RS2_ECOLI | * P0A7E9 | P0A7V0 | pyrh_ecoli | rs2_ecoli |
| P0A7V0 | RS2_ECOLI | * P31473 | P0A7V0 | rava_ecoli | rs2_ecoli |
| P0A7V0 | RS2_ECOLI | * P69405 | P0A7V0 | rca_ecoli  | rs2_ecoli |
| P0A7V0 | RS2_ECOLI | * P15032 | P0A7V0 | rece_ecoli | rs2_ecoli |
| P0A7V0 | RS2_ECOLI | * P09377 | P0A7V0 | rhas_ecoli | rs2_ecoli |
| P0A7V0 | RS2_ECOLI | * P0AG30 | P0A7V0 | rho_ecoli  | rs2_ecoli |
| P0A7V0 | RS2_ECOLI | * P25539 | P0A7V0 | ribd_ecoli | rs2_ecoli |
| P0A7V0 | RS2_ECOLI | * P45748 | P0A7V0 | rimn_ecoli | rs2_ecoli |
| P0A7V0 | RS2_ECOLI | * P63177 | P0A7V0 | rlmb_ecoli | rs2_ecoli |
| P0A7V0 | RS2_ECOLI | * P0C0R7 | P0A7V0 | rlme_ecoli | rs2_ecoli |

|        |           |          |        |            |           |
|--------|-----------|----------|--------|------------|-----------|
| P0A7V0 | RS2_ECOLI | * P0A8I8 | P0A7V0 | rlmh_ecoli | rs2_ecoli |
| P0A7V0 | RS2_ECOLI | * P36979 | P0A7V0 | rlmn_ecoli | rs2_ecoli |
| P0A7V0 | RS2_ECOLI | * P36979 | P0A7V0 | rlmn_ecoli | rs2_ecoli |
| P0A7V0 | RS2_ECOLI | * P37765 | P0A7V0 | rlub_ecoli | rs2_ecoli |
| P0A7V0 | RS2_ECOLI | * P0AA39 | P0A7V0 | rluc_ecoli | rs2_ecoli |
| P0A7V0 | RS2_ECOLI | * P0AA39 | P0A7V0 | rluc_ecoli | rs2_ecoli |
| P0A7V0 | RS2_ECOLI | * P21513 | P0A7V0 | rne_ecoli  | rs2_ecoli |
| P0A7V0 | RS2_ECOLI | * P0A9J0 | P0A7V0 | rng_ecoli  | rs2_ecoli |
| P0A7V0 | RS2_ECOLI | * P0A7Y8 | P0A7V0 | rnpa_ecoli | rs2_ecoli |
| P0A7V0 | RS2_ECOLI | * P0A7Y8 | P0A7V0 | rnpa_ecoli | rs2_ecoli |
| P0A7V0 | RS2_ECOLI | * P21499 | P0A7V0 | rnrc_ecoli | rs2_ecoli |
| P0A7V0 | RS2_ECOLI | * P21499 | P0A7V0 | rnrc_ecoli | rs2_ecoli |
| P0A7V0 | RS2_ECOLI | * P0A7Z4 | P0A7V0 | rpoa_ecoli | rs2_ecoli |
| P0A7V0 | RS2_ECOLI | * P00579 | P0A7V0 | rpod_ecoli | rs2_ecoli |
| P0A7V0 | RS2_ECOLI | * P00579 | P0A7V0 | rpod_ecoli | rs2_ecoli |
| P0A7V0 | RS2_ECOLI | * P13445 | P0A7V0 | rpos_ecoli | rs2_ecoli |
| P0A7V0 | RS2_ECOLI | * P0A800 | P0A7V0 | rpoz_ecoli | rs2_ecoli |
| P0A7V0 | RS2_ECOLI | * P0A776 | P0A7V0 | rppe_ecoli | rs2_ecoli |
| P0A7V0 | RS2_ECOLI | * P0A776 | P0A7V0 | rppe_ecoli | rs2_ecoli |
| P0A7V0 | RS2_ECOLI | * P39286 | P0A7V0 | rsga_ecoli | rs2_ecoli |
| P0A7V0 | RS2_ECOLI | * P0A6U5 | P0A7V0 | rsmg_ecoli | rs2_ecoli |
| P0A7V0 | RS2_ECOLI | * P0AA43 | P0A7V0 | rsua_ecoli | rs2_ecoli |
| P0A7V0 | RS2_ECOLI | * P38035 | P0A7V0 | rtrc_ecoli | rs2_ecoli |
| P0A7V0 | RS2_ECOLI | * P0A812 | P0A7V0 | ruvb_ecoli | rs2_ecoli |
| P0A7V0 | RS2_ECOLI | * P10408 | P0A7V0 | seca_ecoli | rs2_ecoli |
| P0A7V0 | RS2_ECOLI | * P0A828 | P0A7V0 | smg_ecoli  | rs2_ecoli |
| P0A7V0 | RS2_ECOLI | * P21170 | P0A7V0 | spea_ecoli | rs2_ecoli |
| P0A7V0 | RS2_ECOLI | * P0AG24 | P0A7V0 | spot_ecoli | rs2_ecoli |
| P0A7V0 | RS2_ECOLI | * P15082 | P0A7V0 | srlr_ecoli | rs2_ecoli |
| P0A7V0 | RS2_ECOLI | * P21507 | P0A7V0 | srmb_ecoli | rs2_ecoli |
| P0A7V0 | RS2_ECOLI | * P0A832 | P0A7V0 | ssrp_ecoli | rs2_ecoli |
| P0A7V0 | RS2_ECOLI | * P0A832 | P0A7V0 | ssrp_ecoli | rs2_ecoli |
| P0A7V0 | RS2_ECOLI | * P00957 | P0A7V0 | sya_ecoli  | rs2_ecoli |
| P0A7V0 | RS2_ECOLI | * P07395 | P0A7V0 | syfb_ecoli | rs2_ecoli |
| P0A7V0 | RS2_ECOLI | * P00960 | P0A7V0 | syga_ecoli | rs2_ecoli |
| P0A7V0 | RS2_ECOLI | * P07813 | P0A7V0 | syl_ecoli  | rs2_ecoli |
| P0A7V0 | RS2_ECOLI | * P0A8M3 | P0A7V0 | syt_ecoli  | rs2_ecoli |
| P0A7V0 | RS2_ECOLI | * P00954 | P0A7V0 | syw_ecoli  | rs2_ecoli |
| P0A7V0 | RS2_ECOLI | * P0A850 | P0A7V0 | tig_ecoli  | rs2_ecoli |
| P0A7V0 | RS2_ECOLI | * P0A850 | P0A7V0 | tig_ecoli  | rs2_ecoli |
| P0A7V0 | RS2_ECOLI | * P0A858 | P0A7V0 | tpis_ecoli | rs2_ecoli |
| P0A7V0 | RS2_ECOLI | * P0A8I5 | P0A7V0 | trmb_ecoli | rs2_ecoli |
| P0A7V0 | RS2_ECOLI | * P00895 | P0A7V0 | trpe_ecoli | rs2_ecoli |
| P0A7V0 | RS2_ECOLI | * P0A9W0 | P0A7V0 | ular_ecoli | rs2_ecoli |
| P0A7V0 | RS2_ECOLI | * P0A8G0 | P0A7V0 | uvrc_ecoli | rs2_ecoli |



|        |            |   |        |        |            |            |
|--------|------------|---|--------|--------|------------|------------|
| P0A7V0 | RS2_ECOLI  | * | P03018 | P0A7V0 | uvrd_ecoli | rs2_ecoli  |
| P0A7V0 | RS2_ECOLI  | * | P38506 | P0A7V0 | xni_ecoli  | rs2_ecoli  |
| P0A7V0 | RS2_ECOLI  | * | P0A8E5 | P0A7V0 | yacl_ecoli | rs2_ecoli  |
| P0A7V0 | RS2_ECOLI  | * | Q47158 | P0A7V0 | yafp_ecoli | rs2_ecoli  |
| P0A7V0 | RS2_ECOLI  | * | P0AAR3 | P0A7V0 | ybak_ecoli | rs2_ecoli  |
| P0A7V0 | RS2_ECOLI  | * | P0AFP2 | P0A7V0 | ybaz_ecoli | rs2_ecoli  |
| P0A7V0 | RS2_ECOLI  | * | P0AAS7 | P0A7V0 | ybcj_ecoli | rs2_ecoli  |
| P0A7V0 | RS2_ECOLI  | * | P0AAS7 | P0A7V0 | ybcj_ecoli | rs2_ecoli  |
| P0A7V0 | RS2_ECOLI  | * | P75767 | P0A7V0 | ybhk_ecoli | rs2_ecoli  |
| P0A7V0 | RS2_ECOLI  | * | P75829 | P0A7V0 | ybjx_ecoli | rs2_ecoli  |
| P0A7V0 | RS2_ECOLI  | * | P75829 | P0A7V0 | ybjx_ecoli | rs2_ecoli  |
| P0A7V0 | RS2_ECOLI  | * | P0AB43 | P0A7V0 | ycgl_ecoli | rs2_ecoli  |
| P0A7V0 | RS2_ECOLI  | * | P76012 | P0A7V0 | ycgy_ecoli | rs2_ecoli  |
| P0A7V0 | RS2_ECOLI  | * | P37052 | P0A7V0 | ychj_ecoli | rs2_ecoli  |
| P0A7V0 | RS2_ECOLI  | * | P77333 | P0A7V0 | ycjz_ecoli | rs2_ecoli  |
| P0A7V0 | RS2_ECOLI  | * | P77552 | P0A7V0 | ydhq_ecoli | rs2_ecoli  |
| P0A7V0 | RS2_ECOLI  | * | P64479 | P0A7V0 | ydiz_ecoli | rs2_ecoli  |
| P0A7V0 | RS2_ECOLI  | * | P76270 | P0A7V0 | yebr_ecoli | rs2_ecoli  |
| P0A7V0 | RS2_ECOLI  | * | P0AD05 | P0A7V0 | yeca_ecoli | rs2_ecoli  |
| P0A7V0 | RS2_ECOLI  | * | P45508 | P0A7V0 | yfal_ecoli | rs2_ecoli  |
| P0A7V0 | RS2_ECOLI  | * | P76578 | P0A7V0 | yfhm_ecoli | rs2_ecoli  |
| P0A7V0 | RS2_ECOLI  | * | P76594 | P0A7V0 | yfiq_ecoli | rs2_ecoli  |
| P0A7V0 | RS2_ECOLI  | * | P0AC28 | P0A7V0 | ygfa_ecoli | rs2_ecoli  |
| P0A7V0 | RS2_ECOLI  | * | P52062 | P0A7V0 | yggw_ecoli | rs2_ecoli  |
| P0A7V0 | RS2_ECOLI  | * | P45472 | P0A7V0 | yhbq_ecoli | rs2_ecoli  |
| P0A7V0 | RS2_ECOLI  | * | P0AGK4 | P0A7V0 | yhby_ecoli | rs2_ecoli  |
| P0A7V0 | RS2_ECOLI  | * | P0ADK6 | P0A7V0 | yiba_ecoli | rs2_ecoli  |
| P0A7V0 | RS2_ECOLI  | * | P0ADK8 | P0A7V0 | yibl_ecoli | rs2_ecoli  |
| P0A7V0 | RS2_ECOLI  | * | P23839 | P0A7V0 | yicc_ecoli | rs2_ecoli  |
| P0A7V0 | RS2_ECOLI  | * | P32162 | P0A7V0 | yiis_ecoli | rs2_ecoli  |
| P0A7V0 | RS2_ECOLI  | * | P0AF67 | P0A7V0 | yjee_ecoli | rs2_ecoli  |
| P0A7V0 | RS2_ECOLI  | * | P39279 | P0A7V0 | yjej_ecoli | rs2_ecoli  |
| P0A7V0 | RS2_ECOLI  | * | P0ACV8 | P0A7V0 | ymja_ecoli | rs2_ecoli  |
| P0A7V0 | RS2_ECOLI  | * | P65367 | P0A7V0 | yqca_ecoli | rs2_ecoli  |
| P0A7V0 | RS2_ECOLI  | * | P0A8W5 | P0A7V0 | yqge_ecoli | rs2_ecoli  |
| P0A7U7 | RS20_ECOLI | * | P33224 | P0A7U7 | aidb_ecoli | rs20_ecoli |
| P0A7U7 | RS20_ECOLI | * | P77425 | P0A7U7 | allc_ecoli | rs20_ecoli |
| P0A7U7 | RS20_ECOLI | * | P0AE18 | P0A7U7 | ampm_ecoli | rs20_ecoli |
| P0A7U7 | RS20_ECOLI | * | P0A9Y6 | P0A7U7 | cspc_ecoli | rs20_ecoli |
| P0A7U7 | RS20_ECOLI | * | P0A968 | P0A7U7 | cspd_ecoli | rs20_ecoli |
| P0A7U7 | RS20_ECOLI | * | P0AED9 | P0A7U7 | dcm_ecoli  | rs20_ecoli |
| P0A7U7 | RS20_ECOLI | * | P0A9P6 | P0A7U7 | dead_ecoli | rs20_ecoli |
| P0A7U7 | RS20_ECOLI | * | P06966 | P0A7U7 | dica_ecoli | rs20_ecoli |
| P0A7U7 | RS20_ECOLI | * | P03004 | P0A7U7 | dnaa_ecoli | rs20_ecoli |

|        |            |          |        |            |            |
|--------|------------|----------|--------|------------|------------|
| P0A7U7 | RS20_ECOLI | * P26266 | P0A7U7 | fepe_ecoli | rs20_ecoli |
| P0A7U7 | RS20_ECOLI | * P0ADH5 | P0A7U7 | fimb_ecoli | rs20_ecoli |
| P0A7U7 | RS20_ECOLI | * P68066 | P0A7U7 | grca_ecoli | rs20_ecoli |
| P0A7U7 | RS20_ECOLI | * P0A7A9 | P0A7U7 | ipyr_ecoli | rs20_ecoli |
| P0A7U7 | RS20_ECOLI | * P0A715 | P0A7U7 | kdsa_ecoli | rs20_ecoli |
| P0A7U7 | RS20_ECOLI | * P0A722 | P0A7U7 | lpxa_ecoli | rs20_ecoli |
| P0A7U7 | RS20_ECOLI | * P21645 | P0A7U7 | lpxd_ecoli | rs20_ecoli |
| P0A7U7 | RS20_ECOLI | * P0A9F1 | P0A7U7 | mntr_ecoli | rs20_ecoli |
| P0A7U7 | RS20_ECOLI | * P75960 | P0A7U7 | npd_ecoli  | rs20_ecoli |
| P0A7U7 | RS20_ECOLI | * P0A799 | P0A7U7 | pgk_ecoli  | rs20_ecoli |
| P0A7U7 | RS20_ECOLI | * P0A9K3 | P0A7U7 | phol_ecoli | rs20_ecoli |
| P0A7U7 | RS20_ECOLI | * P05055 | P0A7U7 | pnp_ecoli  | rs20_ecoli |
| P0A7U7 | RS20_ECOLI | * P69791 | P0A7U7 | ptqa_ecoli | rs20_ecoli |
| P0A7U7 | RS20_ECOLI | * P0A8J8 | P0A7U7 | rhlb_ecoli | rs20_ecoli |
| P0A7U7 | RS20_ECOLI | * P24211 | P0A7U7 | rhse_ecoli | rs20_ecoli |
| P0A7U7 | RS20_ECOLI | * P37765 | P0A7U7 | rlub_ecoli | rs20_ecoli |
| P0A7U7 | RS20_ECOLI | * P0AA39 | P0A7U7 | rluc_ecoli | rs20_ecoli |
| P0A7U7 | RS20_ECOLI | * P21513 | P0A7U7 | rne_ecoli  | rs20_ecoli |
| P0A7U7 | RS20_ECOLI | * P0A9J0 | P0A7U7 | rng_ecoli  | rs20_ecoli |
| P0A7U7 | RS20_ECOLI | * P0A7Y4 | P0A7U7 | rnh_ecoli  | rs20_ecoli |
| P0A7U7 | RS20_ECOLI | * P0A7Y8 | P0A7U7 | rnpa_ecoli | rs20_ecoli |
| P0A7U7 | RS20_ECOLI | * P21499 | P0A7U7 | rnrc_ecoli | rs20_ecoli |
| P0A7U7 | RS20_ECOLI | * P0A7Z4 | P0A7U7 | rpoa_ecoli | rs20_ecoli |
| P0A7U7 | RS20_ECOLI | * P0A8V2 | P0A7U7 | rpob_ecoli | rs20_ecoli |
| P0A7U7 | RS20_ECOLI | * P0A800 | P0A7U7 | rpoz_ecoli | rs20_ecoli |
| P0A7U7 | RS20_ECOLI | * P0A776 | P0A7U7 | rpph_ecoli | rs20_ecoli |
| P0A7U7 | RS20_ECOLI | * P0AFX4 | P0A7U7 | rsd_ecoli  | rs20_ecoli |
| P0A7U7 | RS20_ECOLI | * P0ACU2 | P0A7U7 | rutr_ecoli | rs20_ecoli |
| P0A7U7 | RS20_ECOLI | * P14081 | P0A7U7 | selb_ecoli | rs20_ecoli |
| P0A7U7 | RS20_ECOLI | * P0A9E2 | P0A7U7 | soxs_ecoli | rs20_ecoli |
| P0A7U7 | RS20_ECOLI | * P0AG24 | P0A7U7 | spot_ecoli | rs20_ecoli |
| P0A7U7 | RS20_ECOLI | * P75792 | P0A7U7 | suph_ecoli | rs20_ecoli |
| P0A7U7 | RS20_ECOLI | * P0A8M3 | P0A7U7 | syt_ecoli  | rs20_ecoli |
| P0A7U7 | RS20_ECOLI | * P0A8I5 | P0A7U7 | trmb_ecoli | rs20_ecoli |
| P0A7U7 | RS20_ECOLI | * P0A9W0 | P0A7U7 | ular_ecoli | rs20_ecoli |
| P0A7U7 | RS20_ECOLI | * P0A8G0 | P0A7U7 | uvrc_ecoli | rs20_ecoli |
| P0A7U7 | RS20_ECOLI | * P0A8E5 | P0A7U7 | yacl_ecoli | rs20_ecoli |
| P0A7U7 | RS20_ECOLI | * P77607 | P0A7U7 | yagl_ecoli | rs20_ecoli |
| P0A7U7 | RS20_ECOLI | * P75829 | P0A7U7 | ybjx_ecoli | rs20_ecoli |
| P0A7U7 | RS20_ECOLI | * P0AGJ5 | P0A7U7 | yfif_ecoli | rs20_ecoli |
| P0A7U7 | RS20_ECOLI | * P76594 | P0A7U7 | yfiq_ecoli | rs20_ecoli |
| P0A7U7 | RS20_ECOLI | * P45524 | P0A7U7 | yhet_ecoli | rs20_ecoli |
| P0A7U7 | RS20_ECOLI | * P32162 | P0A7U7 | yiis_ecoli | rs20_ecoli |
| P0A7U7 | RS20_ECOLI | * P39407 | P0A7U7 | yjju_ecoli | rs20_ecoli |

|        |            |          |        |            |            |
|--------|------------|----------|--------|------------|------------|
| P68679 | RS21_ECOLI | * P0ABH9 | P68679 | clpa_ecoli | rs21_ecoli |
| P68679 | RS21_ECOLI | * P0A968 | P68679 | cspd_ecoli | rs21_ecoli |
| P68679 | RS21_ECOLI | * P0A9P6 | P68679 | dead_ecoli | rs21_ecoli |
| P68679 | RS21_ECOLI | * P0A9P6 | P68679 | dead_ecoli | rs21_ecoli |
| P68679 | RS21_ECOLI | * P23830 | P68679 | pss_ecoli  | rs21_ecoli |
| P68679 | RS21_ECOLI | * P69407 | P68679 | rccb_ecoli | rs21_ecoli |
| P68679 | RS21_ECOLI | * P63177 | P68679 | rlmb_ecoli | rs21_ecoli |
| P68679 | RS21_ECOLI | * P37765 | P68679 | rlub_ecoli | rs21_ecoli |
| P68679 | RS21_ECOLI | * P21513 | P68679 | rne_ecoli  | rs21_ecoli |
| P68679 | RS21_ECOLI | * P0A9J0 | P68679 | rng_ecoli  | rs21_ecoli |
| P68679 | RS21_ECOLI | * P0A7Y8 | P68679 | rnpa_ecoli | rs21_ecoli |
| P68679 | RS21_ECOLI | * P21499 | P68679 | rnrc_ecoli | rs21_ecoli |
| P68679 | RS21_ECOLI | * P0A7Z4 | P68679 | rpoa_ecoli | rs21_ecoli |
| P68679 | RS21_ECOLI | * P0A8V2 | P68679 | rpob_ecoli | rs21_ecoli |
| P68679 | RS21_ECOLI | * P0A850 | P68679 | tig_ecoli  | rs21_ecoli |
| P68679 | RS21_ECOLI | * P0A850 | P68679 | tig_ecoli  | rs21_ecoli |
| P68679 | RS21_ECOLI | * P0A8I5 | P68679 | trmb_ecoli | rs21_ecoli |
| P68679 | RS21_ECOLI | * P0A8E5 | P68679 | yacl_ecoli | rs21_ecoli |
| P68679 | RS21_ECOLI | * P0AD05 | P68679 | yeca_ecoli | rs21_ecoli |
| P68679 | RS21_ECOLI | * P0AGJ5 | P68679 | yfif_ecoli | rs21_ecoli |

|        |           |          |        |            |           |
|--------|-----------|----------|--------|------------|-----------|
| P0A7V3 | RS3_ECOLI | * P24224 | P0A7V3 | acps_ecoli | rs3_ecoli |
| P0A7V3 | RS3_ECOLI | * P06134 | P0A7V3 | ada_ecoli  | rs3_ecoli |
| P0A7V3 | RS3_ECOLI | * P0ABD8 | P0A7V3 | bccp_ecoli | rs3_ecoli |
| P0A7V3 | RS3_ECOLI | * P06709 | P0A7V3 | bira_ecoli | rs3_ecoli |
| P0A7V3 | RS3_ECOLI | * P06610 | P0A7V3 | btue_ecoli | rs3_ecoli |
| P0A7V3 | RS3_ECOLI | * P36659 | P0A7V3 | cbpa_ecoli | rs3_ecoli |
| P0A7V3 | RS3_ECOLI | * P31469 | P0A7V3 | cbrc_ecoli | rs3_ecoli |
| P0A7V3 | RS3_ECOLI | * P0A9X9 | P0A7V3 | cspa_ecoli | rs3_ecoli |
| P0A7V3 | RS3_ECOLI | * P0A9X9 | P0A7V3 | cspa_ecoli | rs3_ecoli |
| P0A7V3 | RS3_ECOLI | * P36995 | P0A7V3 | cspb_ecoli | rs3_ecoli |
| P0A7V3 | RS3_ECOLI | * P0A9Y6 | P0A7V3 | cspc_ecoli | rs3_ecoli |
| P0A7V3 | RS3_ECOLI | * P0A9Y6 | P0A7V3 | cspc_ecoli | rs3_ecoli |
| P0A7V3 | RS3_ECOLI | * P0A968 | P0A7V3 | cspd_ecoli | rs3_ecoli |
| P0A7V3 | RS3_ECOLI | * P0A978 | P0A7V3 | cspg_ecoli | rs3_ecoli |
| P0A7V3 | RS3_ECOLI | * P69488 | P0A7V3 | cuta_ecoli | rs3_ecoli |
| P0A7V3 | RS3_ECOLI | * P0AED9 | P0A7V3 | dcm_ecoli  | rs3_ecoli |
| P0A7V3 | RS3_ECOLI | * P76316 | P0A7V3 | dcyd_ecoli | rs3_ecoli |
| P0A7V3 | RS3_ECOLI | * P0A9P6 | P0A7V3 | dead_ecoli | rs3_ecoli |
| P0A7V3 | RS3_ECOLI | * P0A9P6 | P0A7V3 | dead_ecoli | rs3_ecoli |
| P0A7V3 | RS3_ECOLI | * P0A6P5 | P0A7V3 | der_ecoli  | rs3_ecoli |
| P0A7V3 | RS3_ECOLI | * P00393 | P0A7V3 | dhna_ecoli | rs3_ecoli |
| P0A7V3 | RS3_ECOLI | * P66817 | P0A7V3 | diaa_ecoli | rs3_ecoli |
| P0A7V3 | RS3_ECOLI | * P0AEE8 | P0A7V3 | dma_ecoli  | rs3_ecoli |
| P0A7V3 | RS3_ECOLI | * P03004 | P0A7V3 | dnaa_ecoli | rs3_ecoli |

|        |           |   |        |        |            |           |
|--------|-----------|---|--------|--------|------------|-----------|
| P0A7V3 | RS3_ECOLI | * | P0A6Q6 | P0A7V3 | fabz_ecoli | rs3_ecoli |
| P0A7V3 | RS3_ECOLI | * | P0ADH5 | P0A7V3 | fimb_ecoli | rs3_ecoli |
| P0A7V3 | RS3_ECOLI | * | P0ADH5 | P0A7V3 | fimb_ecoli | rs3_ecoli |
| P0A7V3 | RS3_ECOLI | * | P0ADH5 | P0A7V3 | fimb_ecoli | rs3_ecoli |
| P0A7V3 | RS3_ECOLI | * | P0A6R3 | P0A7V3 | fis_ecoli  | rs3_ecoli |
| P0A7V3 | RS3_ECOLI | * | P60566 | P0A7V3 | fixa_ecoli | rs3_ecoli |
| P0A7V3 | RS3_ECOLI | * | P0AEM0 | P0A7V3 | fkbx_ecoli | rs3_ecoli |
| P0A7V3 | RS3_ECOLI | * | P0ABY4 | P0A7V3 | flaw_ecoli | rs3_ecoli |
| P0A7V3 | RS3_ECOLI | * | P0AEM6 | P0A7V3 | flia_ecoli | rs3_ecoli |
| P0A7V3 | RS3_ECOLI | * | P77609 | P0A7V3 | flxa_ecoli | rs3_ecoli |
| P0A7V3 | RS3_ECOLI | * | P0ACP1 | P0A7V3 | frur_ecoli | rs3_ecoli |
| P0A7V3 | RS3_ECOLI | * | P63201 | P0A7V3 | gadw_ecoli | rs3_ecoli |
| P0A7V3 | RS3_ECOLI | * | P0A9S3 | P0A7V3 | gatd_ecoli | rs3_ecoli |
| P0A7V3 | RS3_ECOLI | * | P0ACC7 | P0A7V3 | glmu_ecoli | rs3_ecoli |
| P0A7V3 | RS3_ECOLI | * | P0A9C5 | P0A7V3 | glna_ecoli | rs3_ecoli |
| P0A7V3 | RS3_ECOLI | * | P0A9C9 | P0A7V3 | glpx_ecoli | rs3_ecoli |
| P0A7V3 | RS3_ECOLI | * | P0A6X3 | P0A7V3 | hfq_ecoli  | rs3_ecoli |
| P0A7V3 | RS3_ECOLI | * | P28630 | P0A7V3 | hola_ecoli | rs3_ecoli |
| P0A7V3 | RS3_ECOLI | * | P43329 | P0A7V3 | hrpa_ecoli | rs3_ecoli |
| P0A7V3 | RS3_ECOLI | * | P0A6Z1 | P0A7V3 | hsca_ecoli | rs3_ecoli |
| P0A7V3 | RS3_ECOLI | * | P77319 | P0A7V3 | hscC_ecoli | rs3_ecoli |
| P0A7V3 | RS3_ECOLI | * | P0A6Y5 | P0A7V3 | hslo_ecoli | rs3_ecoli |
| P0A7V3 | RS3_ECOLI | * | P0ACG8 | P0A7V3 | hslr_ecoli | rs3_ecoli |
| P0A7V3 | RS3_ECOLI | * | P0ACV0 | P0A7V3 | htrb_ecoli | rs3_ecoli |
| P0A7V3 | RS3_ECOLI | * | P19932 | P0A7V3 | hyaf_ecoli | rs3_ecoli |
| P0A7V3 | RS3_ECOLI | * | P0AEV9 | P0A7V3 | hyci_ecoli | rs3_ecoli |
| P0A7V3 | RS3_ECOLI | * | P16528 | P0A7V3 | iclr_ecoli | rs3_ecoli |
| P0A7V3 | RS3_ECOLI | * | P0A6Y1 | P0A7V3 | ihfb_ecoli | rs3_ecoli |
| P0A7V3 | RS3_ECOLI | * | P0A7A9 | P0A7V3 | ipyr_ecoli | rs3_ecoli |
| P0A7V3 | RS3_ECOLI | * | P0A715 | P0A7V3 | kdsa_ecoli | rs3_ecoli |
| P0A7V3 | RS3_ECOLI | * | P0A715 | P0A7V3 | kdsa_ecoli | rs3_ecoli |
| P0A7V3 | RS3_ECOLI | * | P0A9M0 | P0A7V3 | lon_ecoli  | rs3_ecoli |
| P0A7V3 | RS3_ECOLI | * | P21645 | P0A7V3 | lpxd_ecoli | rs3_ecoli |
| P0A7V3 | RS3_ECOLI | * | P21645 | P0A7V3 | lpxd_ecoli | rs3_ecoli |
| P0A7V3 | RS3_ECOLI | * | P21645 | P0A7V3 | lpxd_ecoli | rs3_ecoli |
| P0A7V3 | RS3_ECOLI | * | P32716 | P0A7V3 | mdtn_ecoli | rs3_ecoli |
| P0A7V3 | RS3_ECOLI | * | P0ACH8 | P0A7V3 | melr_ecoli | rs3_ecoli |
| P0A7V3 | RS3_ECOLI | * | P18196 | P0A7V3 | minc_ecoli | rs3_ecoli |
| P0A7V3 | RS3_ECOLI | * | Q46865 | P0A7V3 | mqsR_ecoli | rs3_ecoli |
| P0A7V3 | RS3_ECOLI | * | P76346 | P0A7V3 | mtfa_ecoli | rs3_ecoli |
| P0A7V3 | RS3_ECOLI | * | P0A9H1 | P0A7V3 | mug_ecoli  | rs3_ecoli |
| P0A7V3 | RS3_ECOLI | * | P22523 | P0A7V3 | mukB_ecoli | rs3_ecoli |
| P0A7V3 | RS3_ECOLI | * | P17802 | P0A7V3 | muty_ecoli | rs3_ecoli |
| P0A7V3 | RS3_ECOLI | * | P33594 | P0A7V3 | nike_ecoli | rs3_ecoli |
| P0A7V3 | RS3_ECOLI | * | P75960 | P0A7V3 | npd_ecoli  | rs3_ecoli |

|        |           |          |        |            |           |
|--------|-----------|----------|--------|------------|-----------|
| P0A7V3 | RS3_ECOLI | * P0AFF6 | P0A7V3 | nusa_ecoli | rs3_ecoli |
| P0A7V3 | RS3_ECOLI | * P0AFF6 | P0A7V3 | nusa_ecoli | rs3_ecoli |
| P0A7V3 | RS3_ECOLI | * P0AFG0 | P0A7V3 | nusg_ecoli | rs3_ecoli |
| P0A7V3 | RS3_ECOLI | * P42641 | P0A7V3 | obg_ecoli  | rs3_ecoli |
| P0A7V3 | RS3_ECOLI | * P33136 | P0A7V3 | opgg_ecoli | rs3_ecoli |
| P0A7V3 | RS3_ECOLI | * P0A9K3 | P0A7V3 | phol_ecoli | rs3_ecoli |
| P0A7V3 | RS3_ECOLI | * P0ADI0 | P0A7V3 | pinr_ecoli | rs3_ecoli |
| P0A7V3 | RS3_ECOLI | * P0A7A7 | P0A7V3 | plsb_ecoli | rs3_ecoli |
| P0A7V3 | RS3_ECOLI | * P0A7A7 | P0A7V3 | plsb_ecoli | rs3_ecoli |
| P0A7V3 | RS3_ECOLI | * P05055 | P0A7V3 | pnp_ecoli  | rs3_ecoli |
| P0A7V3 | RS3_ECOLI | * P17888 | P0A7V3 | pria_ecoli | rs3_ecoli |
| P0A7V3 | RS3_ECOLI | * P07013 | P0A7V3 | prib_ecoli | rs3_ecoli |
| P0A7V3 | RS3_ECOLI | * P23830 | P0A7V3 | pss_ecoli  | rs3_ecoli |
| P0A7V3 | RS3_ECOLI | * P0A7E9 | P0A7V3 | pyrh_ecoli | rs3_ecoli |
| P0A7V3 | RS3_ECOLI | * P64530 | P0A7V3 | rcnr_ecoli | rs3_ecoli |
| P0A7V3 | RS3_ECOLI | * P69407 | P0A7V3 | rcsb_ecoli | rs3_ecoli |
| P0A7V3 | RS3_ECOLI | * P69407 | P0A7V3 | rcsb_ecoli | rs3_ecoli |
| P0A7V3 | RS3_ECOLI | * P24230 | P0A7V3 | recg_ecoli | rs3_ecoli |
| P0A7V3 | RS3_ECOLI | * P0A7H3 | P0A7V3 | reco_ecoli | rs3_ecoli |
| P0A7V3 | RS3_ECOLI | * P37692 | P0A7V3 | rfaf_ecoli | rs3_ecoli |
| P0A7V3 | RS3_ECOLI | * P25740 | P0A7V3 | rfag_ecoli | rs3_ecoli |
| P0A7V3 | RS3_ECOLI | * P27240 | P0A7V3 | rfay_ecoli | rs3_ecoli |
| P0A7V3 | RS3_ECOLI | * P0A8J8 | P0A7V3 | rhlb_ecoli | rs3_ecoli |
| P0A7V3 | RS3_ECOLI | * P0AEI4 | P0A7V3 | rimo_ecoli | rs3_ecoli |
| P0A7V3 | RS3_ECOLI | * P75864 | P0A7V3 | rlml_ecoli | rs3_ecoli |
| P0A7V3 | RS3_ECOLI | * P0ADR6 | P0A7V3 | rlmm_ecoli | rs3_ecoli |
| P0A7V3 | RS3_ECOLI | * P36979 | P0A7V3 | rlmn_ecoli | rs3_ecoli |
| P0A7V3 | RS3_ECOLI | * P36979 | P0A7V3 | rlmn_ecoli | rs3_ecoli |
| P0A7V3 | RS3_ECOLI | * P37765 | P0A7V3 | rlub_ecoli | rs3_ecoli |
| P0A7V3 | RS3_ECOLI | * P0AA39 | P0A7V3 | rluc_ecoli | rs3_ecoli |
| P0A7V3 | RS3_ECOLI | * P0AA39 | P0A7V3 | rluc_ecoli | rs3_ecoli |
| P0A7V3 | RS3_ECOLI | * P75966 | P0A7V3 | rlue_ecoli | rs3_ecoli |
| P0A7V3 | RS3_ECOLI | * P32684 | P0A7V3 | rluf_ecoli | rs3_ecoli |
| P0A7V3 | RS3_ECOLI | * P21513 | P0A7V3 | rne_ecoli  | rs3_ecoli |
| P0A7V3 | RS3_ECOLI | * P0A9J0 | P0A7V3 | rng_ecoli  | rs3_ecoli |
| P0A7V3 | RS3_ECOLI | * P0A7Y4 | P0A7V3 | rnh_ecoli  | rs3_ecoli |
| P0A7V3 | RS3_ECOLI | * P0A7Y8 | P0A7V3 | rnpa_ecoli | rs3_ecoli |
| P0A7V3 | RS3_ECOLI | * P0A7Y8 | P0A7V3 | rnpa_ecoli | rs3_ecoli |
| P0A7V3 | RS3_ECOLI | * P21499 | P0A7V3 | rnrc_ecoli | rs3_ecoli |
| P0A7V3 | RS3_ECOLI | * P0A7Z4 | P0A7V3 | rpoa_ecoli | rs3_ecoli |
| P0A7V3 | RS3_ECOLI | * P0A8V2 | P0A7V3 | rpob_ecoli | rs3_ecoli |
| P0A7V3 | RS3_ECOLI | * P0A8T7 | P0A7V3 | rpoc_ecoli | rs3_ecoli |
| P0A7V3 | RS3_ECOLI | * P00579 | P0A7V3 | rpod_ecoli | rs3_ecoli |
| P0A7V3 | RS3_ECOLI | * P0A776 | P0A7V3 | rpph_ecoli | rs3_ecoli |
| P0A7V3 | RS3_ECOLI | * P39286 | P0A7V3 | rsga_ecoli | rs3_ecoli |



|        |           |          |        |            |           |
|--------|-----------|----------|--------|------------|-----------|
| P0A7V3 | RS3_ECOLI | * P39406 | P0A7V3 | rsmc_ecoli | rs3_ecoli |
| P0A7V3 | RS3_ECOLI | * P0A8I1 | P0A7V3 | ruvx_ecoli | rs3_ecoli |
| P0A7V3 | RS3_ECOLI | * P0AG86 | P0A7V3 | secb_ecoli | rs3_ecoli |
| P0A7V3 | RS3_ECOLI | * P14081 | P0A7V3 | selb_ecoli | rs3_ecoli |
| P0A7V3 | RS3_ECOLI | * P0A828 | P0A7V3 | smg_ecoli  | rs3_ecoli |
| P0A7V3 | RS3_ECOLI | * P21170 | P0A7V3 | spea_ecoli | rs3_ecoli |
| P0A7V3 | RS3_ECOLI | * P0AG24 | P0A7V3 | spot_ecoli | rs3_ecoli |
| P0A7V3 | RS3_ECOLI | * P0AFV4 | P0A7V3 | spr_ecoli  | rs3_ecoli |
| P0A7V3 | RS3_ECOLI | * P39902 | P0A7V3 | sprt_ecoli | rs3_ecoli |
| P0A7V3 | RS3_ECOLI | * P21507 | P0A7V3 | srmb_ecoli | rs3_ecoli |
| P0A7V3 | RS3_ECOLI | * P0AFZ3 | P0A7V3 | sspb_ecoli | rs3_ecoli |
| P0A7V3 | RS3_ECOLI | * P0A832 | P0A7V3 | ssrp_ecoli | rs3_ecoli |
| P0A7V3 | RS3_ECOLI | * P04805 | P0A7V3 | syecoli    | rs3_ecoli |
| P0A7V3 | RS3_ECOLI | * P00960 | P0A7V3 | syga_ecoli | rs3_ecoli |
| P0A7V3 | RS3_ECOLI | * P0A8M3 | P0A7V3 | syt_ecoli  | rs3_ecoli |
| P0A7V3 | RS3_ECOLI | * P0A850 | P0A7V3 | tig_ecoli  | rs3_ecoli |
| P0A7V3 | RS3_ECOLI | * P0A850 | P0A7V3 | tig_ecoli  | rs3_ecoli |
| P0A7V3 | RS3_ECOLI | * P0A8I5 | P0A7V3 | trmb_ecoli | rs3_ecoli |
| P0A7V3 | RS3_ECOLI | * P00895 | P0A7V3 | trpe_ecoli | rs3_ecoli |
| P0A7V3 | RS3_ECOLI | * P0A881 | P0A7V3 | trpr_ecoli | rs3_ecoli |
| P0A7V3 | RS3_ECOLI | * P0A9W0 | P0A7V3 | ular_ecoli | rs3_ecoli |
| P0A7V3 | RS3_ECOLI | * P08390 | P0A7V3 | usg_ecoli  | rs3_ecoli |
| P0A7V3 | RS3_ECOLI | * P0A8G0 | P0A7V3 | uvrc_ecoli | rs3_ecoli |
| P0A7V3 | RS3_ECOLI | * P0A8G0 | P0A7V3 | uvrc_ecoli | rs3_ecoli |
| P0A7V3 | RS3_ECOLI | * P77414 | P0A7V3 | wcaa_ecoli | rs3_ecoli |
| P0A7V3 | RS3_ECOLI | * P71242 | P0A7V3 | wcak_ecoli | rs3_ecoli |
| P0A7V3 | RS3_ECOLI | * P0A8E5 | P0A7V3 | yacl_ecoli | rs3_ecoli |
| P0A7V3 | RS3_ECOLI | * Q47158 | P0A7V3 | yafp_ecoli | rs3_ecoli |
| P0A7V3 | RS3_ECOLI | * P0AAS7 | P0A7V3 | ybcj_ecoli | rs3_ecoli |
| P0A7V3 | RS3_ECOLI | * P0AAS7 | P0A7V3 | ybcj_ecoli | rs3_ecoli |
| P0A7V3 | RS3_ECOLI | * P0A898 | P0A7V3 | ybey_ecoli | rs3_ecoli |
| P0A7V3 | RS3_ECOLI | * P75829 | P0A7V3 | ybjx_ecoli | rs3_ecoli |
| P0A7V3 | RS3_ECOLI | * P75829 | P0A7V3 | ybjx_ecoli | rs3_ecoli |
| P0A7V3 | RS3_ECOLI | * P0AB28 | P0A7V3 | yced_ecoli | rs3_ecoli |
| P0A7V3 | RS3_ECOLI | * P27431 | P0A7V3 | ydfd_ecoli | rs3_ecoli |
| P0A7V3 | RS3_ECOLI | * P0AB43 | P0A7V3 | ycgl_ecoli | rs3_ecoli |
| P0A7V3 | RS3_ECOLI | * P76012 | P0A7V3 | ycgy_ecoli | rs3_ecoli |
| P0A7V3 | RS3_ECOLI | * P37052 | P0A7V3 | ychn_ecoli | rs3_ecoli |
| P0A7V3 | RS3_ECOLI | * P08245 | P0A7V3 | ycih_ecoli | rs3_ecoli |
| P0A7V3 | RS3_ECOLI | * P76104 | P0A7V3 | ydcp_ecoli | rs3_ecoli |
| P0A7V3 | RS3_ECOLI | * P0ACX9 | P0A7V3 | ydie_ecoli | rs3_ecoli |
| P0A7V3 | RS3_ECOLI | * P64476 | P0A7V3 | ydihecoli  | rs3_ecoli |
| P0A7V3 | RS3_ECOLI | * P64479 | P0A7V3 | ydiz_ecoli | rs3_ecoli |
| P0A7V3 | RS3_ECOLI | * P0AD33 | P0A7V3 | yfcz_ecoli | rs3_ecoli |
| P0A7V3 | RS3_ECOLI | * P76515 | P0A7V3 | yfds_ecoli | rs3_ecoli |



|        |           |          |        |            |           |
|--------|-----------|----------|--------|------------|-----------|
| P0A7V3 | RS3_ECOLI | * P0AGJ5 | P0A7V3 | yfif_ecoli | rs3_ecoli |
| P0A7V3 | RS3_ECOLI | * P52119 | P0A7V3 | yfjf_ecoli | rs3_ecoli |
| P0A7V3 | RS3_ECOLI | * Q46901 | P0A7V3 | ygcl_ecoli | rs3_ecoli |
| P0A7V3 | RS3_ECOLI | * P52037 | P0A7V3 | ygff_ecoli | rs3_ecoli |
| P0A7V3 | RS3_ECOLI | * P38521 | P0A7V3 | yggf_ecoli | rs3_ecoli |
| P0A7V3 | RS3_ECOLI | * P0ADT5 | P0A7V3 | yggj_ecoli | rs3_ecoli |
| P0A7V3 | RS3_ECOLI | * P67701 | P0A7V3 | yggm_ecoli | rs3_ecoli |
| P0A7V3 | RS3_ECOLI | * P45472 | P0A7V3 | yhbq_ecoli | rs3_ecoli |
| P0A7V3 | RS3_ECOLI | * P64616 | P0A7V3 | yhco_ecoli | rs3_ecoli |
| P0A7V3 | RS3_ECOLI | * P09162 | P0A7V3 | yjaa_ecoli | rs3_ecoli |
| P0A7V3 | RS3_ECOLI | * P0AF67 | P0A7V3 | yjee_ecoli | rs3_ecoli |
| P0A7V3 | RS3_ECOLI | * P0AF76 | P0A7V3 | yjfi_ecoli | rs3_ecoli |
| P0A7V3 | RS3_ECOLI | * P75967 | P0A7V3 | ymfd_ecoli | rs3_ecoli |
| P0A7V3 | RS3_ECOLI | * P75992 | P0A7V3 | ymga_ecoli | rs3_ecoli |
| P0A7V3 | RS3_ECOLI | * P0ACV8 | P0A7V3 | ymja_ecoli | rs3_ecoli |
| P0A7V3 | RS3_ECOLI | * P76148 | P0A7V3 | yneg_ecoli | rs3_ecoli |
| P0A7V3 | RS3_ECOLI | * P76222 | P0A7V3 | ynja_ecoli | rs3_ecoli |
| P0A7V3 | RS3_ECOLI | * P76539 | P0A7V3 | ypea_ecoli | rs3_ecoli |
| P0A7V3 | RS3_ECOLI | * P76612 | P0A7V3 | ypjb_ecoli | rs3_ecoli |
|        |           |          |        |            |           |
| P0A7V8 | RS4_ECOLI | * P33224 | P0A7V8 | aidb_ecoli | rs4_ecoli |
| P0A7V8 | RS4_ECOLI | * Q06065 | P0A7V8 | atoc_ecoli | rs4_ecoli |
| P0A7V8 | RS4_ECOLI | * P36659 | P0A7V8 | cbpa_ecoli | rs4_ecoli |
| P0A7V8 | RS4_ECOLI | * P31469 | P0A7V8 | cbrc_ecoli | rs4_ecoli |
| P0A7V8 | RS4_ECOLI | * P0AE72 | P0A7V8 | chpr_ecoli | rs4_ecoli |
| P0A7V8 | RS4_ECOLI | * P0ABH9 | P0A7V8 | clpa_ecoli | rs4_ecoli |
| P0A7V8 | RS4_ECOLI | * P0A9X9 | P0A7V8 | cspa_ecoli | rs4_ecoli |
| P0A7V8 | RS4_ECOLI | * P0A9X9 | P0A7V8 | cspa_ecoli | rs4_ecoli |
| P0A7V8 | RS4_ECOLI | * P36995 | P0A7V8 | cspb_ecoli | rs4_ecoli |
| P0A7V8 | RS4_ECOLI | * P36995 | P0A7V8 | cspb_ecoli | rs4_ecoli |
| P0A7V8 | RS4_ECOLI | * P0A9Y6 | P0A7V8 | cspc_ecoli | rs4_ecoli |
| P0A7V8 | RS4_ECOLI | * P0A9Y6 | P0A7V8 | cspc_ecoli | rs4_ecoli |
| P0A7V8 | RS4_ECOLI | * P0A9Y6 | P0A7V8 | cspc_ecoli | rs4_ecoli |
| P0A7V8 | RS4_ECOLI | * P0A968 | P0A7V8 | cspd_ecoli | rs4_ecoli |
| P0A7V8 | RS4_ECOLI | * P0A968 | P0A7V8 | cspd_ecoli | rs4_ecoli |
| P0A7V8 | RS4_ECOLI | * P0A972 | P0A7V8 | cspe_ecoli | rs4_ecoli |
| P0A7V8 | RS4_ECOLI | * P0A972 | P0A7V8 | cspe_ecoli | rs4_ecoli |
| P0A7V8 | RS4_ECOLI | * P0A978 | P0A7V8 | cspg_ecoli | rs4_ecoli |
| P0A7V8 | RS4_ECOLI | * P0A986 | P0A7V8 | cspe_ecoli | rs4_ecoli |
| P0A7V8 | RS4_ECOLI | * P11557 | P0A7V8 | cspe_ecoli | rs4_ecoli |
| P0A7V8 | RS4_ECOLI | * P0ACF0 | P0A7V8 | damx_ecoli | rs4_ecoli |
| P0A7V8 | RS4_ECOLI | * P0ACF4 | P0A7V8 | dbha_ecoli | rs4_ecoli |
| P0A7V8 | RS4_ECOLI | * P37195 | P0A7V8 | dbhb_ecoli | rs4_ecoli |
| P0A7V8 | RS4_ECOLI | * P76316 | P0A7V8 | dctr_ecoli | rs4_ecoli |
| P0A7V8 | RS4_ECOLI | * P0A9P6 | P0A7V8 | dcyd_ecoli | rs4_ecoli |
| P0A7V8 | RS4_ECOLI |          | P0A7V8 | dead_ecoli | rs4_ecoli |

|        |           |          |        |            |           |
|--------|-----------|----------|--------|------------|-----------|
| P0A7V8 | RS4_ECOLI | * P0A9P6 | P0A7V8 | dead_ecoli | rs4_ecoli |
| P0A7V8 | RS4_ECOLI | * P0AEE3 | P0A7V8 | degs_ecoli | rs4_ecoli |
| P0A7V8 | RS4_ECOLI | * P06966 | P0A7V8 | dica_ecoli | rs4_ecoli |
| P0A7V8 | RS4_ECOLI | * P27296 | P0A7V8 | ding_ecoli | rs4_ecoli |
| P0A7V8 | RS4_ECOLI | * P0AEE8 | P0A7V8 | dma_ecoli  | rs4_ecoli |
| P0A7V8 | RS4_ECOLI | * P0AEG6 | P0A7V8 | dsbc_ecoli | rs4_ecoli |
| P0A7V8 | RS4_ECOLI | * P77202 | P0A7V8 | dsbg_ecoli | rs4_ecoli |
| P0A7V8 | RS4_ECOLI | * P0AEH5 | P0A7V8 | elab_ecoli | rs4_ecoli |
| P0A7V8 | RS4_ECOLI | * P0AEJ2 | P0A7V8 | entc_ecoli | rs4_ecoli |
| P0A7V8 | RS4_ECOLI | * P06616 | P0A7V8 | era_ecoli  | rs4_ecoli |
| P0A7V8 | RS4_ECOLI | * P06616 | P0A7V8 | era_ecoli  | rs4_ecoli |
| P0A7V8 | RS4_ECOLI | * P77277 | P0A7V8 | eutj_ecoli | rs4_ecoli |
| P0A7V8 | RS4_ECOLI | * P0A6Q6 | P0A7V8 | fabz_ecoli | rs4_ecoli |
| P0A7V8 | RS4_ECOLI | * P28861 | P0A7V8 | fenr_ecoli | rs4_ecoli |
| P0A7V8 | RS4_ECOLI | * P0ADH5 | P0A7V8 | fimb_ecoli | rs4_ecoli |
| P0A7V8 | RS4_ECOLI | * P0A6R3 | P0A7V8 | fis_ecoli  | rs4_ecoli |
| P0A7V8 | RS4_ECOLI | * P45523 | P0A7V8 | fkba_ecoli | rs4_ecoli |
| P0A7V8 | RS4_ECOLI | * P0AEM0 | P0A7V8 | fkbx_ecoli | rs4_ecoli |
| P0A7V8 | RS4_ECOLI | * P0AEM0 | P0A7V8 | fkbx_ecoli | rs4_ecoli |
| P0A7V8 | RS4_ECOLI | * P0ABY4 | P0A7V8 | flaw_ecoli | rs4_ecoli |
| P0A7V8 | RS4_ECOLI | * P52627 | P0A7V8 | fliz_ecoli | rs4_ecoli |
| P0A7V8 | RS4_ECOLI | * P23882 | P0A7V8 | fmt_ecoli  | rs4_ecoli |
| P0A7V8 | RS4_ECOLI | * P0A9A6 | P0A7V8 | ftsz_ecoli | rs4_ecoli |
| P0A7V8 | RS4_ECOLI | * P0ACC7 | P0A7V8 | glmu_ecoli | rs4_ecoli |
| P0A7V8 | RS4_ECOLI | * P13035 | P0A7V8 | glpd_ecoli | rs4_ecoli |
| P0A7V8 | RS4_ECOLI | * P0A6X3 | P0A7V8 | hfq_ecoli  | rs4_ecoli |
| P0A7V8 | RS4_ECOLI | * P0A6X3 | P0A7V8 | hfq_ecoli  | rs4_ecoli |
| P0A7V8 | RS4_ECOLI | * P34749 | P0A7V8 | hofq_ecoli | rs4_ecoli |
| P0A7V8 | RS4_ECOLI | * P0A6Z1 | P0A7V8 | hsca_ecoli | rs4_ecoli |
| P0A7V8 | RS4_ECOLI | * P77319 | P0A7V8 | hscc_ecoli | rs4_ecoli |
| P0A7V8 | RS4_ECOLI | * P0ACG8 | P0A7V8 | hslr_ecoli | rs4_ecoli |
| P0A7V8 | RS4_ECOLI | * P0A6X7 | P0A7V8 | ihfa_ecoli | rs4_ecoli |
| P0A7V8 | RS4_ECOLI | * P0A6X7 | P0A7V8 | ihfa_ecoli | rs4_ecoli |
| P0A7V8 | RS4_ECOLI | * P0A6Y1 | P0A7V8 | ihfb_ecoli | rs4_ecoli |
| P0A7V8 | RS4_ECOLI | * P24218 | P0A7V8 | intd_ecoli | rs4_ecoli |
| P0A7V8 | RS4_ECOLI | * P62617 | P0A7V8 | ispf_ecoli | rs4_ecoli |
| P0A7V8 | RS4_ECOLI | * P0AB74 | P0A7V8 | kbay_ecoli | rs4_ecoli |
| P0A7V8 | RS4_ECOLI | * P0A715 | P0A7V8 | kdsa_ecoli | rs4_ecoli |
| P0A7V8 | RS4_ECOLI | * P33232 | P0A7V8 | lidd_ecoli | rs4_ecoli |
| P0A7V8 | RS4_ECOLI | * P0A722 | P0A7V8 | lpxa_ecoli | rs4_ecoli |
| P0A7V8 | RS4_ECOLI | * P21645 | P0A7V8 | lpxd_ecoli | rs4_ecoli |
| P0A7V8 | RS4_ECOLI | * P21645 | P0A7V8 | lpxd_ecoli | rs4_ecoli |
| P0A7V8 | RS4_ECOLI | * P21645 | P0A7V8 | lpxd_ecoli | rs4_ecoli |
| P0A7V8 | RS4_ECOLI | * P24200 | P0A7V8 | mcra_ecoli | rs4_ecoli |
| P0A7V8 | RS4_ECOLI | * P61889 | P0A7V8 | mdh_ecoli  | rs4_ecoli |

|        |           |   |        |        |                            |                           |
|--------|-----------|---|--------|--------|----------------------------|---------------------------|
| P0A7V8 | RS4_ECOLI | * | P18196 | P0A7V8 | <a href="#">minc_ecoli</a> | <a href="#">rs4_ecoli</a> |
| P0A7V8 | RS4_ECOLI | * | P25738 | P0A7V8 | <a href="#">msyb_ecoli</a> | <a href="#">rs4_ecoli</a> |
| P0A7V8 | RS4_ECOLI | * | P76346 | P0A7V8 | <a href="#">mtfa_ecoli</a> | <a href="#">rs4_ecoli</a> |
| P0A7V8 | RS4_ECOLI | * | P17443 | P0A7V8 | <a href="#">murg_ecoli</a> | <a href="#">rs4_ecoli</a> |
| P0A7V8 | RS4_ECOLI | * | P77245 | P0A7V8 | <a href="#">murr_ecoli</a> | <a href="#">rs4_ecoli</a> |
| P0A7V8 | RS4_ECOLI | * | P09152 | P0A7V8 | <a href="#">narg_ecoli</a> | <a href="#">rs4_ecoli</a> |
| P0A7V8 | RS4_ECOLI | * | P63020 | P0A7V8 | <a href="#">nfua_ecoli</a> | <a href="#">rs4_ecoli</a> |
| P0A7V8 | RS4_ECOLI | * | P33594 | P0A7V8 | <a href="#">nike_ecoli</a> | <a href="#">rs4_ecoli</a> |
| P0A7V8 | RS4_ECOLI | * | P04846 | P0A7V8 | <a href="#">nlpa_ecoli</a> | <a href="#">rs4_ecoli</a> |
| P0A7V8 | RS4_ECOLI | * | P75960 | P0A7V8 | <a href="#">npd_ecoli</a>  | <a href="#">rs4_ecoli</a> |
| P0A7V8 | RS4_ECOLI | * | P75960 | P0A7V8 | <a href="#">npd_ecoli</a>  | <a href="#">rs4_ecoli</a> |
| P0A7V8 | RS4_ECOLI | * | P32712 | P0A7V8 | <a href="#">nrfg_ecoli</a> | <a href="#">rs4_ecoli</a> |
| P0A7V8 | RS4_ECOLI | * | P0AFF6 | P0A7V8 | <a href="#">nusa_ecoli</a> | <a href="#">rs4_ecoli</a> |
| P0A7V8 | RS4_ECOLI | * | P0AFF6 | P0A7V8 | <a href="#">nusa_ecoli</a> | <a href="#">rs4_ecoli</a> |
| P0A7V8 | RS4_ECOLI | * | P0A780 | P0A7V8 | <a href="#">nusb_ecoli</a> | <a href="#">rs4_ecoli</a> |
| P0A7V8 | RS4_ECOLI | * | P42641 | P0A7V8 | <a href="#">obg_ecoli</a>  | <a href="#">rs4_ecoli</a> |
| P0A7V8 | RS4_ECOLI | * | P28305 | P0A7V8 | <a href="#">pabc_ecoli</a> | <a href="#">rs4_ecoli</a> |
| P0A7V8 | RS4_ECOLI | * | P31057 | P0A7V8 | <a href="#">panb_ecoli</a> | <a href="#">rs4_ecoli</a> |
| P0A7V8 | RS4_ECOLI | * | P0A9K3 | P0A7V8 | <a href="#">phol_ecoli</a> | <a href="#">rs4_ecoli</a> |
| P0A7V8 | RS4_ECOLI | * | P0A7A7 | P0A7V8 | <a href="#">plsb_ecoli</a> | <a href="#">rs4_ecoli</a> |
| P0A7V8 | RS4_ECOLI | * | P0A7A7 | P0A7V8 | <a href="#">plsb_ecoli</a> | <a href="#">rs4_ecoli</a> |
| P0A7V8 | RS4_ECOLI | * | P21369 | P0A7V8 | <a href="#">pnca_ecoli</a> | <a href="#">rs4_ecoli</a> |
| P0A7V8 | RS4_ECOLI | * | P05055 | P0A7V8 | <a href="#">pnp_ecoli</a>  | <a href="#">rs4_ecoli</a> |
| P0A7V8 | RS4_ECOLI | * | P23862 | P0A7V8 | <a href="#">pric_ecoli</a> | <a href="#">rs4_ecoli</a> |
| P0A7V8 | RS4_ECOLI | * | P0A8T1 | P0A7V8 | <a href="#">prma_ecoli</a> | <a href="#">rs4_ecoli</a> |
| P0A7V8 | RS4_ECOLI | * | P23830 | P0A7V8 | <a href="#">pss_ecoli</a>  | <a href="#">rs4_ecoli</a> |
| P0A7V8 | RS4_ECOLI | * | P23830 | P0A7V8 | <a href="#">pss_ecoli</a>  | <a href="#">rs4_ecoli</a> |
| P0A7V8 | RS4_ECOLI | * | P30235 | P0A7V8 | <a href="#">psuk_ecoli</a> | <a href="#">rs4_ecoli</a> |
| P0A7V8 | RS4_ECOLI | * | P76062 | P0A7V8 | <a href="#">racr_ecoli</a> | <a href="#">rs4_ecoli</a> |
| P0A7V8 | RS4_ECOLI | * | P69407 | P0A7V8 | <a href="#">rcsb_ecoli</a> | <a href="#">rs4_ecoli</a> |
| P0A7V8 | RS4_ECOLI | * | P24230 | P0A7V8 | <a href="#">recg_ecoli</a> | <a href="#">rs4_ecoli</a> |
| P0A7V8 | RS4_ECOLI | * | P37692 | P0A7V8 | <a href="#">rfaf_ecoli</a> | <a href="#">rs4_ecoli</a> |
| P0A7V8 | RS4_ECOLI | * | P32169 | P0A7V8 | <a href="#">rhad_ecoli</a> | <a href="#">rs4_ecoli</a> |
| P0A7V8 | RS4_ECOLI | * | P0A8J8 | P0A7V8 | <a href="#">rhlb_ecoli</a> | <a href="#">rs4_ecoli</a> |
| P0A7V8 | RS4_ECOLI | * | P25888 | P0A7V8 | <a href="#">rhle_ecoli</a> | <a href="#">rs4_ecoli</a> |
| P0A7V8 | RS4_ECOLI | * | P25539 | P0A7V8 | <a href="#">ribd_ecoli</a> | <a href="#">rs4_ecoli</a> |
| P0A7V8 | RS4_ECOLI | * | P13857 | P0A7V8 | <a href="#">riml_ecoli</a> | <a href="#">rs4_ecoli</a> |
| P0A7V8 | RS4_ECOLI | * | P0AEI4 | P0A7V8 | <a href="#">rimo_ecoli</a> | <a href="#">rs4_ecoli</a> |
| P0A7V8 | RS4_ECOLI | * | P0C0R7 | P0A7V8 | <a href="#">rlme_ecoli</a> | <a href="#">rs4_ecoli</a> |
| P0A7V8 | RS4_ECOLI | * | P75864 | P0A7V8 | <a href="#">rlml_ecoli</a> | <a href="#">rs4_ecoli</a> |
| P0A7V8 | RS4_ECOLI | * | P36979 | P0A7V8 | <a href="#">rlmn_ecoli</a> | <a href="#">rs4_ecoli</a> |
| P0A7V8 | RS4_ECOLI | * | P36979 | P0A7V8 | <a href="#">rlmn_ecoli</a> | <a href="#">rs4_ecoli</a> |
| P0A7V8 | RS4_ECOLI | * | P37765 | P0A7V8 | <a href="#">rlub_ecoli</a> | <a href="#">rs4_ecoli</a> |
| P0A7V8 | RS4_ECOLI | * | P0AA39 | P0A7V8 | <a href="#">rluc_ecoli</a> | <a href="#">rs4_ecoli</a> |
| P0A7V8 | RS4_ECOLI | * | P32684 | P0A7V8 | <a href="#">rluf_ecoli</a> | <a href="#">rs4_ecoli</a> |

|        |           |          |        |            |           |
|--------|-----------|----------|--------|------------|-----------|
| P0A7V8 | RS4_ECOLI | * P21513 | P0A7V8 | rne_ecoli  | rs4_ecoli |
| P0A7V8 | RS4_ECOLI | * P21513 | P0A7V8 | rne_ecoli  | rs4_ecoli |
| P0A7V8 | RS4_ECOLI | * P0A9J0 | P0A7V8 | rng_ecoli  | rs4_ecoli |
| P0A7V8 | RS4_ECOLI | * P0A7Y8 | P0A7V8 | rnpa_ecoli | rs4_ecoli |
| P0A7V8 | RS4_ECOLI | * P0A7Y8 | P0A7V8 | rnpa_ecoli | rs4_ecoli |
| P0A7V8 | RS4_ECOLI | * P21499 | P0A7V8 | rnrc_ecoli | rs4_ecoli |
| P0A7V8 | RS4_ECOLI | * P21499 | P0A7V8 | rnrc_ecoli | rs4_ecoli |
| P0A7V8 | RS4_ECOLI | * P0A7Z4 | P0A7V8 | rpoa_ecoli | rs4_ecoli |
| P0A7V8 | RS4_ECOLI | * P0A7Z4 | P0A7V8 | rpoa_ecoli | rs4_ecoli |
| P0A7V8 | RS4_ECOLI | * P0A8T7 | P0A7V8 | rpoc_ecoli | rs4_ecoli |
| P0A7V8 | RS4_ECOLI | * P0A8T7 | P0A7V8 | rpoc_ecoli | rs4_ecoli |
| P0A7V8 | RS4_ECOLI | * P00579 | P0A7V8 | rpod_ecoli | rs4_ecoli |
| P0A7V8 | RS4_ECOLI | * P0AGB6 | P0A7V8 | rpoe_ecoli | rs4_ecoli |
| P0A7V8 | RS4_ECOLI | * P0A776 | P0A7V8 | rpph_ecoli | rs4_ecoli |
| P0A7V8 | RS4_ECOLI | * P0A776 | P0A7V8 | rpph_ecoli | rs4_ecoli |
| P0A7V8 | RS4_ECOLI | * P36929 | P0A7V8 | rsmb_ecoli | rs4_ecoli |
| P0A7V8 | RS4_ECOLI | * P39406 | P0A7V8 | rsmc_ecoli | rs4_ecoli |
| P0A7V8 | RS4_ECOLI | * P0AGL7 | P0A7V8 | rsme_ecoli | rs4_ecoli |
| P0A7V8 | RS4_ECOLI | * P67087 | P0A7V8 | rsmi_ecoli | rs4_ecoli |
| P0A7V8 | RS4_ECOLI | * P0AA43 | P0A7V8 | rsua_ecoli | rs4_ecoli |
| P0A7V8 | RS4_ECOLI | * P46850 | P0A7V8 | rtcb_ecoli | rs4_ecoli |
| P0A7V8 | RS4_ECOLI | * P14081 | P0A7V8 | selb_ecoli | rs4_ecoli |
| P0A7V8 | RS4_ECOLI | * P14081 | P0A7V8 | selb_ecoli | rs4_ecoli |
| P0A7V8 | RS4_ECOLI | * P0A823 | P0A7V8 | sfsa_ecoli | rs4_ecoli |
| P0A7V8 | RS4_ECOLI | * P0ACH1 | P0A7V8 | sfsb_ecoli | rs4_ecoli |
| P0A7V8 | RS4_ECOLI | * P0A9K9 | P0A7V8 | slyd_ecoli | rs4_ecoli |
| P0A7V8 | RS4_ECOLI | * P0A9E2 | P0A7V8 | soxs_ecoli | rs4_ecoli |
| P0A7V8 | RS4_ECOLI | * P21170 | P0A7V8 | spea_ecoli | rs4_ecoli |
| P0A7V8 | RS4_ECOLI | * P0AG24 | P0A7V8 | spot_ecoli | rs4_ecoli |
| P0A7V8 | RS4_ECOLI | * P0AFZ3 | P0A7V8 | sspb_ecoli | rs4_ecoli |
| P0A7V8 | RS4_ECOLI | * P0ACG1 | P0A7V8 | stpa_ecoli | rs4_ecoli |
| P0A7V8 | RS4_ECOLI | * P0ADG4 | P0A7V8 | suhb_ecoli | rs4_ecoli |
| P0A7V8 | RS4_ECOLI | * P00954 | P0A7V8 | syw_ecoli  | rs4_ecoli |
| P0A7V8 | RS4_ECOLI | * P37610 | P0A7V8 | taud_ecoli | rs4_ecoli |
| P0A7V8 | RS4_ECOLI | * P75948 | P0A7V8 | thik_ecoli | rs4_ecoli |
| P0A7V8 | RS4_ECOLI | * P0A850 | P0A7V8 | tig_ecoli  | rs4_ecoli |
| P0A7V8 | RS4_ECOLI | * P0AGI8 | P0A7V8 | trka_ecoli | rs4_ecoli |
| P0A7V8 | RS4_ECOLI | * P0A8I5 | P0A7V8 | trmb_ecoli | rs4_ecoli |
| P0A7V8 | RS4_ECOLI | * P0AG03 | P0A7V8 | ubix_ecoli | rs4_ecoli |
| P0A7V8 | RS4_ECOLI | * P0A9W0 | P0A7V8 | ular_ecoli | rs4_ecoli |
| P0A7V8 | RS4_ECOLI | * P0A9W0 | P0A7V8 | ular_ecoli | rs4_ecoli |
| P0A7V8 | RS4_ECOLI | * P60472 | P0A7V8 | upps_ecoli | rs4_ecoli |
| P0A7V8 | RS4_ECOLI | * P0A8G0 | P0A7V8 | uvrc_ecoli | rs4_ecoli |
| P0A7V8 | RS4_ECOLI | * P0A8G0 | P0A7V8 | uvrc_ecoli | rs4_ecoli |
| P0A7V8 | RS4_ECOLI | * P71242 | P0A7V8 | wcak_ecoli | rs4_ecoli |

|        |           |          |        |            |           |
|--------|-----------|----------|--------|------------|-----------|
| P0A7V8 | RS4_ECOLI | * P0A8E5 | P0A7V8 | yacl_ecoli | rs4_ecoli |
| P0A7V8 | RS4_ECOLI | * P0A8E5 | P0A7V8 | yacl_ecoli | rs4_ecoli |
| P0A7V8 | RS4_ECOLI | * P40711 | P0A7V8 | yaej_ecoli | rs4_ecoli |
| P0A7V8 | RS4_ECOLI | * Q47269 | P0A7V8 | ybcn_ecoli | rs4_ecoli |
| P0A7V8 | RS4_ECOLI | * P0A898 | P0A7V8 | ybey_ecoli | rs4_ecoli |
| P0A7V8 | RS4_ECOLI | * P0A8Z3 | P0A7V8 | ybgc_ecoli | rs4_ecoli |
| P0A7V8 | RS4_ECOLI | * P75767 | P0A7V8 | ybhk_ecoli | rs4_ecoli |
| P0A7V8 | RS4_ECOLI | * P30176 | P0A7V8 | ybia_ecoli | rs4_ecoli |
| P0A7V8 | RS4_ECOLI | * P75829 | P0A7V8 | ybjx_ecoli | rs4_ecoli |
| P0A7V8 | RS4_ECOLI | * P0AFQ7 | P0A7V8 | ycfh_ecoli | rs4_ecoli |
| P0A7V8 | RS4_ECOLI | * P75989 | P0A7V8 | ycge_ecoli | rs4_ecoli |
| P0A7V8 | RS4_ECOLI | * P0AB43 | P0A7V8 | ycgl_ecoli | rs4_ecoli |
| P0A7V8 | RS4_ECOLI | * P76004 | P0A7V8 | ycgm_ecoli | rs4_ecoli |
| P0A7V8 | RS4_ECOLI | * P30192 | P0A7V8 | ychg_ecoli | rs4_ecoli |
| P0A7V8 | RS4_ECOLI | * P37052 | P0A7V8 | ychj_ecoli | rs4_ecoli |
| P0A7V8 | RS4_ECOLI | * P08245 | P0A7V8 | ycih_ecoli | rs4_ecoli |
| P0A7V8 | RS4_ECOLI | * P76046 | P0A7V8 | ycjx_ecoli | rs4_ecoli |
| P0A7V8 | RS4_ECOLI | * P76122 | P0A7V8 | yddj_ecoli | rs4_ecoli |
| P0A7V8 | RS4_ECOLI | * P76165 | P0A7V8 | ydfx_ecoli | rs4_ecoli |
| P0A7V8 | RS4_ECOLI | * P77564 | P0A7V8 | ydhw_ecoli | rs4_ecoli |
| P0A7V8 | RS4_ECOLI | * P0ACX9 | P0A7V8 | ydie_ecoli | rs4_ecoli |
| P0A7V8 | RS4_ECOLI | * P0ACX9 | P0A7V8 | ydie_ecoli | rs4_ecoli |
| P0A7V8 | RS4_ECOLI | * P0ACY1 | P0A7V8 | yджа_ecoli | rs4_ecoli |
| P0A7V8 | RS4_ECOLI | * P77721 | P0A7V8 | yджf_ecoli | rs4_ecoli |
| P0A7V8 | RS4_ECOLI | * P76243 | P0A7V8 | yeao_ecoli | rs4_ecoli |
| P0A7V8 | RS4_ECOLI | * P76318 | P0A7V8 | yedk_ecoli | rs4_ecoli |
| P0A7V8 | RS4_ECOLI | * P0AD12 | P0A7V8 | yeez_ecoli | rs4_ecoli |
| P0A7V8 | RS4_ECOLI | * P0AGJ5 | P0A7V8 | yfif_ecoli | rs4_ecoli |
| P0A7V8 | RS4_ECOLI | * P0AGJ5 | P0A7V8 | yfif_ecoli | rs4_ecoli |
| P0A7V8 | RS4_ECOLI | * P0AGJ5 | P0A7V8 | yfif_ecoli | rs4_ecoli |
| P0A7V8 | RS4_ECOLI | * P52119 | P0A7V8 | yfjf_ecoli | rs4_ecoli |
| P0A7V8 | RS4_ECOLI | * P77295 | P0A7V8 | ygav_ecoli | rs4_ecoli |
| P0A7V8 | RS4_ECOLI | * Q46906 | P0A7V8 | ygcp_ecoli | rs4_ecoli |
| P0A7V8 | RS4_ECOLI | * P38521 | P0A7V8 | yggf_ecoli | rs4_ecoli |
| P0A7V8 | RS4_ECOLI | * P0ADT5 | P0A7V8 | ygic_ecoli | rs4_ecoli |
| P0A7V8 | RS4_ECOLI | * P42624 | P0A7V8 | yhak_ecoli | rs4_ecoli |
| P0A7V8 | RS4_ECOLI | * P45472 | P0A7V8 | yhbq_ecoli | rs4_ecoli |
| P0A7V8 | RS4_ECOLI | * P45545 | P0A7V8 | yhfs_ecoli | rs4_ecoli |
| P0A7V8 | RS4_ECOLI | * P45550 | P0A7V8 | yhfx_ecoli | rs4_ecoli |
| P0A7V8 | RS4_ECOLI | * P37634 | P0A7V8 | yhir_ecoli | rs4_ecoli |
| P0A7V8 | RS4_ECOLI | * P0ADP9 | P0A7V8 | yihd_ecoli | rs4_ecoli |
| P0A7V8 | RS4_ECOLI | * P09162 | P0A7V8 | yjaa_ecoli | rs4_ecoli |
| P0A7V8 | RS4_ECOLI | * P0AF67 | P0A7V8 | yjee_ecoli | rs4_ecoli |
| P0A7V8 | RS4_ECOLI | * P0ACV8 | P0A7V8 | ymja_ecoli | rs4_ecoli |
| P0A7V8 | RS4_ECOLI | * P76148 | P0A7V8 | yneg_ecoli | rs4_ecoli |



|        |           |          |        |            |           |
|--------|-----------|----------|--------|------------|-----------|
| P0A7W1 | RS5_ECOLI | * P33224 | P0A7W1 | aidb_ecoli | rs5_ecoli |
| P0A7W1 | RS5_ECOLI | * P0ACN4 | P0A7W1 | allr_ecoli | rs5_ecoli |
| P0A7W1 | RS5_ECOLI | * P0AE18 | P0A7W1 | ampm_ecoli | rs5_ecoli |
| P0A7W1 | RS5_ECOLI | * P06610 | P0A7W1 | btue_ecoli | rs5_ecoli |
| P0A7W1 | RS5_ECOLI | * P0A9H5 | P0A7W1 | btur_ecoli | rs5_ecoli |
| P0A7W1 | RS5_ECOLI | * P36659 | P0A7W1 | cbpa_ecoli | rs5_ecoli |
| P0A7W1 | RS5_ECOLI | * P31469 | P0A7W1 | cbrc_ecoli | rs5_ecoli |
| P0A7W1 | RS5_ECOLI | * P0A6I6 | P0A7W1 | coad_ecoli | rs5_ecoli |
| P0A7W1 | RS5_ECOLI | * P0ACJ8 | P0A7W1 | crp_ecoli  | rs5_ecoli |
| P0A7W1 | RS5_ECOLI | * P0A9X9 | P0A7W1 | cspa_ecoli | rs5_ecoli |
| P0A7W1 | RS5_ECOLI | * P0A9Y6 | P0A7W1 | cspc_ecoli | rs5_ecoli |
| P0A7W1 | RS5_ECOLI | * P0A9Y6 | P0A7W1 | cspc_ecoli | rs5_ecoli |
| P0A7W1 | RS5_ECOLI | * P0A968 | P0A7W1 | cspd_ecoli | rs5_ecoli |
| P0A7W1 | RS5_ECOLI | * P0A968 | P0A7W1 | cspd_ecoli | rs5_ecoli |
| P0A7W1 | RS5_ECOLI | * P0A972 | P0A7W1 | cspe_ecoli | rs5_ecoli |
| P0A7W1 | RS5_ECOLI | * P0A978 | P0A7W1 | cspg_ecoli | rs5_ecoli |
| P0A7W1 | RS5_ECOLI | * P0A978 | P0A7W1 | cspg_ecoli | rs5_ecoli |
| P0A7W1 | RS5_ECOLI | * P0A6J1 | P0A7W1 | cysc_ecoli | rs5_ecoli |
| P0A7W1 | RS5_ECOLI | * P11557 | P0A7W1 | damx_ecoli | rs5_ecoli |
| P0A7W1 | RS5_ECOLI | * P0AED9 | P0A7W1 | dcm_ecoli  | rs5_ecoli |
| P0A7W1 | RS5_ECOLI | * P76316 | P0A7W1 | dcyd_ecoli | rs5_ecoli |
| P0A7W1 | RS5_ECOLI | * P0A9P6 | P0A7W1 | dead_ecoli | rs5_ecoli |
| P0A7W1 | RS5_ECOLI | * P0A9P6 | P0A7W1 | dead_ecoli | rs5_ecoli |
| P0A7W1 | RS5_ECOLI | * P03004 | P0A7W1 | dnaa_ecoli | rs5_ecoli |
| P0A7W1 | RS5_ECOLI | * P0ACB0 | P0A7W1 | dnab_ecoli | rs5_ecoli |
| P0A7W1 | RS5_ECOLI | * P08622 | P0A7W1 | dnaj_ecoli | rs5_ecoli |
| P0A7W1 | RS5_ECOLI | * P0ABT2 | P0A7W1 | dps_ecoli  | rs5_ecoli |
| P0A7W1 | RS5_ECOLI | * P33371 | P0A7W1 | dusc_ecoli | rs5_ecoli |
| P0A7W1 | RS5_ECOLI | * P0A6P1 | P0A7W1 | efts_ecoli | rs5_ecoli |
| P0A7W1 | RS5_ECOLI | * P0A6P9 | P0A7W1 | eno_ecoli  | rs5_ecoli |
| P0A7W1 | RS5_ECOLI | * P06616 | P0A7W1 | era_ecoli  | rs5_ecoli |
| P0A7W1 | RS5_ECOLI | * P06616 | P0A7W1 | era_ecoli  | rs5_ecoli |
| P0A7W1 | RS5_ECOLI | * P0A6Q3 | P0A7W1 | faba_ecoli | rs5_ecoli |
| P0A7W1 | RS5_ECOLI | * P0A6Q6 | P0A7W1 | fabz_ecoli | rs5_ecoli |
| P0A7W1 | RS5_ECOLI | * P76503 | P0A7W1 | fadi_ecoli | rs5_ecoli |
| P0A7W1 | RS5_ECOLI | * P07658 | P0A7W1 | fdhf_ecoli | rs5_ecoli |
| P0A7W1 | RS5_ECOLI | * P0ADH5 | P0A7W1 | fimb_ecoli | rs5_ecoli |
| P0A7W1 | RS5_ECOLI | * P0A6R3 | P0A7W1 | fis_ecoli  | rs5_ecoli |
| P0A7W1 | RS5_ECOLI | * P61949 | P0A7W1 | flav_ecoli | rs5_ecoli |
| P0A7W1 | RS5_ECOLI | * P31068 | P0A7W1 | flih_ecoli | rs5_ecoli |
| P0A7W1 | RS5_ECOLI | * P0A9R7 | P0A7W1 | ftse_ecoli | rs5_ecoli |
| P0A7W1 | RS5_ECOLI | * P0A9A6 | P0A7W1 | ftsz_ecoli | rs5_ecoli |
| P0A7W1 | RS5_ECOLI | * P31120 | P0A7W1 | glmm_ecoli | rs5_ecoli |
| P0A7W1 | RS5_ECOLI | * P0ACC7 | P0A7W1 | glmu_ecoli | rs5_ecoli |



|        |           |   |        |        |                            |                           |
|--------|-----------|---|--------|--------|----------------------------|---------------------------|
| P0A7W1 | RS5_ECOLI | * | P13035 | P0A7W1 | <a href="#">glpd_ecoli</a> | <a href="#">rs5_ecoli</a> |
| P0A7W1 | RS5_ECOLI | * | P0A6W5 | P0A7W1 | <a href="#">grea_ecoli</a> | <a href="#">rs5_ecoli</a> |
| P0A7W1 | RS5_ECOLI | * | P30128 | P0A7W1 | <a href="#">greb_ecoli</a> | <a href="#">rs5_ecoli</a> |
| P0A7W1 | RS5_ECOLI | * | P09372 | P0A7W1 | <a href="#">grpe_ecoli</a> | <a href="#">rs5_ecoli</a> |
| P0A7W1 | RS5_ECOLI | * | P0A6X3 | P0A7W1 | <a href="#">hfq_ecoli</a>  | <a href="#">rs5_ecoli</a> |
| P0A7W1 | RS5_ECOLI | * | P28905 | P0A7W1 | <a href="#">holc_ecoli</a> | <a href="#">rs5_ecoli</a> |
| P0A7W1 | RS5_ECOLI | * | P43329 | P0A7W1 | <a href="#">hrpa_ecoli</a> | <a href="#">rs5_ecoli</a> |
| P0A7W1 | RS5_ECOLI | * | P0A6Z1 | P0A7W1 | <a href="#">hsca_ecoli</a> | <a href="#">rs5_ecoli</a> |
| P0A7W1 | RS5_ECOLI | * | P77319 | P0A7W1 | <a href="#">hscg_ecoli</a> | <a href="#">rs5_ecoli</a> |
| P0A7W1 | RS5_ECOLI | * | P0A6Y5 | P0A7W1 | <a href="#">hslo_ecoli</a> | <a href="#">rs5_ecoli</a> |
| P0A7W1 | RS5_ECOLI | * | P0ACG8 | P0A7W1 | <a href="#">hslr_ecoli</a> | <a href="#">rs5_ecoli</a> |
| P0A7W1 | RS5_ECOLI | * | P0A6H5 | P0A7W1 | <a href="#">hslu_ecoli</a> | <a href="#">rs5_ecoli</a> |
| P0A7W1 | RS5_ECOLI | * | P19932 | P0A7W1 | <a href="#">hyaf_ecoli</a> | <a href="#">rs5_ecoli</a> |
| P0A7W1 | RS5_ECOLI | * | P16528 | P0A7W1 | <a href="#">iclr_ecoli</a> | <a href="#">rs5_ecoli</a> |
| P0A7W1 | RS5_ECOLI | * | P0A6Y1 | P0A7W1 | <a href="#">ihfb_ecoli</a> | <a href="#">rs5_ecoli</a> |
| P0A7W1 | RS5_ECOLI | * | P32053 | P0A7W1 | <a href="#">inta_ecoli</a> | <a href="#">rs5_ecoli</a> |
| P0A7W1 | RS5_ECOLI | * | P0A7A9 | P0A7W1 | <a href="#">ipyr_ecoli</a> | <a href="#">rs5_ecoli</a> |
| P0A7W1 | RS5_ECOLI | * | P0A715 | P0A7W1 | <a href="#">kdsa_ecoli</a> | <a href="#">rs5_ecoli</a> |
| P0A7W1 | RS5_ECOLI | * | P0AC75 | P0A7W1 | <a href="#">kdta_ecoli</a> | <a href="#">rs5_ecoli</a> |
| P0A7W1 | RS5_ECOLI | * | P38393 | P0A7W1 | <a href="#">kil_ecoli</a>  | <a href="#">rs5_ecoli</a> |
| P0A7W1 | RS5_ECOLI | * | P60785 | P0A7W1 | <a href="#">lepa_ecoli</a> | <a href="#">rs5_ecoli</a> |
| P0A7W1 | RS5_ECOLI | * | P0A7C2 | P0A7W1 | <a href="#">lexa_ecoli</a> | <a href="#">rs5_ecoli</a> |
| P0A7W1 | RS5_ECOLI | * | P21645 | P0A7W1 | <a href="#">lpxd_ecoli</a> | <a href="#">rs5_ecoli</a> |
| P0A7W1 | RS5_ECOLI | * | P21645 | P0A7W1 | <a href="#">lpxd_ecoli</a> | <a href="#">rs5_ecoli</a> |
| P0A7W1 | RS5_ECOLI | * | P22523 | P0A7W1 | <a href="#">mukb_ecoli</a> | <a href="#">rs5_ecoli</a> |
| P0A7W1 | RS5_ECOLI | * | P76535 | P0A7W1 | <a href="#">murq_ecoli</a> | <a href="#">rs5_ecoli</a> |
| P0A7W1 | RS5_ECOLI | * | P68739 | P0A7W1 | <a href="#">nfi_ecoli</a>  | <a href="#">rs5_ecoli</a> |
| P0A7W1 | RS5_ECOLI | * | P0A9N8 | P0A7W1 | <a href="#">nrdg_ecoli</a> | <a href="#">rs5_ecoli</a> |
| P0A7W1 | RS5_ECOLI | * | P0AFD1 | P0A7W1 | <a href="#">nuoe_ecoli</a> | <a href="#">rs5_ecoli</a> |
| P0A7W1 | RS5_ECOLI | * | P0AFF6 | P0A7W1 | <a href="#">nusa_ecoli</a> | <a href="#">rs5_ecoli</a> |
| P0A7W1 | RS5_ECOLI | * | P0AFF6 | P0A7W1 | <a href="#">nusa_ecoli</a> | <a href="#">rs5_ecoli</a> |
| P0A7W1 | RS5_ECOLI | * | P0A780 | P0A7W1 | <a href="#">nusb_ecoli</a> | <a href="#">rs5_ecoli</a> |
| P0A7W1 | RS5_ECOLI | * | P0AFG0 | P0A7W1 | <a href="#">nusg_ecoli</a> | <a href="#">rs5_ecoli</a> |
| P0A7W1 | RS5_ECOLI | * | P0AFG0 | P0A7W1 | <a href="#">nusg_ecoli</a> | <a href="#">rs5_ecoli</a> |
| P0A7W1 | RS5_ECOLI | * | P42641 | P0A7W1 | <a href="#">obg_ecoli</a>  | <a href="#">rs5_ecoli</a> |
| P0A7W1 | RS5_ECOLI | * | P76577 | P0A7W1 | <a href="#">pbpc_ecoli</a> | <a href="#">rs5_ecoli</a> |
| P0A7W1 | RS5_ECOLI | * | P0A9K3 | P0A7W1 | <a href="#">phol_ecoli</a> | <a href="#">rs5_ecoli</a> |
| P0A7W1 | RS5_ECOLI | * | P0A9K3 | P0A7W1 | <a href="#">phol_ecoli</a> | <a href="#">rs5_ecoli</a> |
| P0A7W1 | RS5_ECOLI | * | P0A7A7 | P0A7W1 | <a href="#">plsb_ecoli</a> | <a href="#">rs5_ecoli</a> |
| P0A7W1 | RS5_ECOLI | * | P05055 | P0A7W1 | <a href="#">pnp_ecoli</a>  | <a href="#">rs5_ecoli</a> |
| P0A7W1 | RS5_ECOLI | * | P05055 | P0A7W1 | <a href="#">pnp_ecoli</a>  | <a href="#">rs5_ecoli</a> |
| P0A7W1 | RS5_ECOLI | * | P23830 | P0A7W1 | <a href="#">pss_ecoli</a>  | <a href="#">rs5_ecoli</a> |
| P0A7W1 | RS5_ECOLI | * | P0A7E9 | P0A7W1 | <a href="#">pyrh_ecoli</a> | <a href="#">rs5_ecoli</a> |
| P0A7W1 | RS5_ECOLI | * | P60240 | P0A7W1 | <a href="#">rapa_ecoli</a> | <a href="#">rs5_ecoli</a> |
| P0A7W1 | RS5_ECOLI | * | P0A7H3 | P0A7W1 | <a href="#">reco_ecoli</a> | <a href="#">rs5_ecoli</a> |

|        |           |          |        |            |           |
|--------|-----------|----------|--------|------------|-----------|
| P0A7W1 | RS5_ECOLI | * P0A8J8 | P0A7W1 | rhlb_ecoli | rs5_ecoli |
| P0A7W1 | RS5_ECOLI | * P45748 | P0A7W1 | rimn_ecoli | rs5_ecoli |
| P0A7W1 | RS5_ECOLI | * P0AEI4 | P0A7W1 | rimo_ecoli | rs5_ecoli |
| P0A7W1 | RS5_ECOLI | * P0A8A8 | P0A7W1 | rimp_ecoli | rs5_ecoli |
| P0A7W1 | RS5_ECOLI | * P63177 | P0A7W1 | rlmb_ecoli | rs5_ecoli |
| P0A7W1 | RS5_ECOLI | * P0C0R7 | P0A7W1 | rlme_ecoli | rs5_ecoli |
| P0A7W1 | RS5_ECOLI | * P36979 | P0A7W1 | rlmn_ecoli | rs5_ecoli |
| P0A7W1 | RS5_ECOLI | * P36979 | P0A7W1 | rlmn_ecoli | rs5_ecoli |
| P0A7W1 | RS5_ECOLI | * P37765 | P0A7W1 | rlub_ecoli | rs5_ecoli |
| P0A7W1 | RS5_ECOLI | * P37765 | P0A7W1 | rlub_ecoli | rs5_ecoli |
| P0A7W1 | RS5_ECOLI | * P0AA39 | P0A7W1 | rluc_ecoli | rs5_ecoli |
| P0A7W1 | RS5_ECOLI | * P0AA39 | P0A7W1 | rluc_ecoli | rs5_ecoli |
| P0A7W1 | RS5_ECOLI | * P30850 | P0A7W1 | rnb_ecoli  | rs5_ecoli |
| P0A7W1 | RS5_ECOLI | * P21513 | P0A7W1 | rne_ecoli  | rs5_ecoli |
| P0A7W1 | RS5_ECOLI | * P0A9J0 | P0A7W1 | rng_ecoli  | rs5_ecoli |
| P0A7W1 | RS5_ECOLI | * P0A7Y4 | P0A7W1 | rnh_ecoli  | rs5_ecoli |
| P0A7W1 | RS5_ECOLI | * P0A7Y8 | P0A7W1 | rnpa_ecoli | rs5_ecoli |
| P0A7W1 | RS5_ECOLI | * P0A7Y8 | P0A7W1 | rnpa_ecoli | rs5_ecoli |
| P0A7W1 | RS5_ECOLI | * P21499 | P0A7W1 | rnrc_ecoli | rs5_ecoli |
| P0A7W1 | RS5_ECOLI | * P21499 | P0A7W1 | rnrc_ecoli | rs5_ecoli |
| P0A7W1 | RS5_ECOLI | * P0A7Z4 | P0A7W1 | rpoa_ecoli | rs5_ecoli |
| P0A7W1 | RS5_ECOLI | * P0A7Z4 | P0A7W1 | rpoa_ecoli | rs5_ecoli |
| P0A7W1 | RS5_ECOLI | * P0A7Z4 | P0A7W1 | rpoa_ecoli | rs5_ecoli |
| P0A7W1 | RS5_ECOLI | * P0A8V2 | P0A7W1 | rpob_ecoli | rs5_ecoli |
| P0A7W1 | RS5_ECOLI | * P0A8T7 | P0A7W1 | rpoc_ecoli | rs5_ecoli |
| P0A7W1 | RS5_ECOLI | * P0A8T7 | P0A7W1 | rpoc_ecoli | rs5_ecoli |
| P0A7W1 | RS5_ECOLI | * P00579 | P0A7W1 | rpod_ecoli | rs5_ecoli |
| P0A7W1 | RS5_ECOLI | * P0A776 | P0A7W1 | rpph_ecoli | rs5_ecoli |
| P0A7W1 | RS5_ECOLI | * P0A776 | P0A7W1 | rpph_ecoli | rs5_ecoli |
| P0A7W1 | RS5_ECOLI | * P14081 | P0A7W1 | selb_ecoli | rs5_ecoli |
| P0A7W1 | RS5_ECOLI | * P0A9K9 | P0A7W1 | slyd_ecoli | rs5_ecoli |
| P0A7W1 | RS5_ECOLI | * P0AG24 | P0A7W1 | spot_ecoli | rs5_ecoli |
| P0A7W1 | RS5_ECOLI | * P15082 | P0A7W1 | srlr_ecoli | rs5_ecoli |
| P0A7W1 | RS5_ECOLI | * P0A832 | P0A7W1 | ssrp_ecoli | rs5_ecoli |
| P0A7W1 | RS5_ECOLI | * P00960 | P0A7W1 | syga_ecoli | rs5_ecoli |
| P0A7W1 | RS5_ECOLI | * P0A8M3 | P0A7W1 | syt_ecoli  | rs5_ecoli |
| P0A7W1 | RS5_ECOLI | * P00954 | P0A7W1 | syw_ecoli  | rs5_ecoli |
| P0A7W1 | RS5_ECOLI | * P0A847 | P0A7W1 | tgt_ecoli  | rs5_ecoli |
| P0A7W1 | RS5_ECOLI | * P0A850 | P0A7W1 | tig_ecoli  | rs5_ecoli |
| P0A7W1 | RS5_ECOLI | * P0A850 | P0A7W1 | tig_ecoli  | rs5_ecoli |
| P0A7W1 | RS5_ECOLI | * P0A850 | P0A7W1 | tig_ecoli  | rs5_ecoli |
| P0A7W1 | RS5_ECOLI | * P0A8I5 | P0A7W1 | trmb_ecoli | rs5_ecoli |
| P0A7W1 | RS5_ECOLI | * P0A9W0 | P0A7W1 | ular_ecoli | rs5_ecoli |
| P0A7W1 | RS5_ECOLI | * P0A9W0 | P0A7W1 | ular_ecoli | rs5_ecoli |
| P0A7W1 | RS5_ECOLI | * P0AG11 | P0A7W1 | umud_ecoli | rs5_ecoli |

|        |           |   |        |        |                            |                           |
|--------|-----------|---|--------|--------|----------------------------|---------------------------|
| P0A7W1 | RS5_ECOLI | * | P0A8G0 | P0A7W1 | <a href="#">uvrc_ecoli</a> | <a href="#">rs5_ecoli</a> |
| P0A7W1 | RS5_ECOLI | * | P03018 | P0A7W1 | <a href="#">uvrd_ecoli</a> | <a href="#">rs5_ecoli</a> |
| P0A7W1 | RS5_ECOLI | * | P71242 | P0A7W1 | <a href="#">wcak_ecoli</a> | <a href="#">rs5_ecoli</a> |
| P0A7W1 | RS5_ECOLI | * | P0A8E5 | P0A7W1 | <a href="#">yacl_ecoli</a> | <a href="#">rs5_ecoli</a> |
| P0A7W1 | RS5_ECOLI | * | P0AAS7 | P0A7W1 | <a href="#">ybcj_ecoli</a> | <a href="#">rs5_ecoli</a> |
| P0A7W1 | RS5_ECOLI | * | P0A898 | P0A7W1 | <a href="#">ybey_ecoli</a> | <a href="#">rs5_ecoli</a> |
| P0A7W1 | RS5_ECOLI | * | P75767 | P0A7W1 | <a href="#">ybhk_ecoli</a> | <a href="#">rs5_ecoli</a> |
| P0A7W1 | RS5_ECOLI | * | P75829 | P0A7W1 | <a href="#">ybjx_ecoli</a> | <a href="#">rs5_ecoli</a> |
| P0A7W1 | RS5_ECOLI | * | P0A8N0 | P0A7W1 | <a href="#">ycbg_ecoli</a> | <a href="#">rs5_ecoli</a> |
| P0A7W1 | RS5_ECOLI | * | P76012 | P0A7W1 | <a href="#">ycgy_ecoli</a> | <a href="#">rs5_ecoli</a> |
| P0A7W1 | RS5_ECOLI | * | P76104 | P0A7W1 | <a href="#">ydcg_ecoli</a> | <a href="#">rs5_ecoli</a> |
| P0A7W1 | RS5_ECOLI | * | P64476 | P0A7W1 | <a href="#">ydih_ecoli</a> | <a href="#">rs5_ecoli</a> |
| P0A7W1 | RS5_ECOLI | * | P64479 | P0A7W1 | <a href="#">ydiz_ecoli</a> | <a href="#">rs5_ecoli</a> |
| P0A7W1 | RS5_ECOLI | * | P0AD05 | P0A7W1 | <a href="#">yeca_ecoli</a> | <a href="#">rs5_ecoli</a> |
| P0A7W1 | RS5_ECOLI | * | P37774 | P0A7W1 | <a href="#">yecc_ecoli</a> | <a href="#">rs5_ecoli</a> |
| P0A7W1 | RS5_ECOLI | * | P0A8A2 | P0A7W1 | <a href="#">yeen_ecoli</a> | <a href="#">rs5_ecoli</a> |
| P0A7W1 | RS5_ECOLI | * | P65556 | P0A7W1 | <a href="#">yfcd_ecoli</a> | <a href="#">rs5_ecoli</a> |
| P0A7W1 | RS5_ECOLI | * | P77656 | P0A7W1 | <a href="#">yfdk_ecoli</a> | <a href="#">rs5_ecoli</a> |
| P0A7W1 | RS5_ECOLI | * | P76538 | P0A7W1 | <a href="#">yfez_ecoli</a> | <a href="#">rs5_ecoli</a> |
| P0A7W1 | RS5_ECOLI | * | P76578 | P0A7W1 | <a href="#">yfhm_ecoli</a> | <a href="#">rs5_ecoli</a> |
| P0A7W1 | RS5_ECOLI | * | P0AGJ5 | P0A7W1 | <a href="#">yfif_ecoli</a> | <a href="#">rs5_ecoli</a> |
| P0A7W1 | RS5_ECOLI | * | P0AGJ5 | P0A7W1 | <a href="#">yfif_ecoli</a> | <a href="#">rs5_ecoli</a> |
| P0A7W1 | RS5_ECOLI | * | P76594 | P0A7W1 | <a href="#">yfiq_ecoli</a> | <a href="#">rs5_ecoli</a> |
| P0A7W1 | RS5_ECOLI | * | Q46927 | P0A7W1 | <a href="#">ygdI_ecoli</a> | <a href="#">rs5_ecoli</a> |
| P0A7W1 | RS5_ECOLI | * | P0ADT5 | P0A7W1 | <a href="#">ygic_ecoli</a> | <a href="#">rs5_ecoli</a> |
| P0A7W1 | RS5_ECOLI | * | P67660 | P0A7W1 | <a href="#">yhaj_ecoli</a> | <a href="#">rs5_ecoli</a> |
| P0A7W1 | RS5_ECOLI | * | P45472 | P0A7W1 | <a href="#">yhbq_ecoli</a> | <a href="#">rs5_ecoli</a> |
| P0A7W1 | RS5_ECOLI | * | P64616 | P0A7W1 | <a href="#">yhco_ecoli</a> | <a href="#">rs5_ecoli</a> |
| P0A7W1 | RS5_ECOLI | * | P0ADK8 | P0A7W1 | <a href="#">yibl_ecoli</a> | <a href="#">rs5_ecoli</a> |
| P0A7W1 | RS5_ECOLI | * | P32162 | P0A7W1 | <a href="#">yiis_ecoli</a> | <a href="#">rs5_ecoli</a> |
| P0A7W1 | RS5_ECOLI | * | P09163 | P0A7W1 | <a href="#">yjab_ecoli</a> | <a href="#">rs5_ecoli</a> |
| P0A7W1 | RS5_ECOLI | * | P32694 | P0A7W1 | <a href="#">yjbm_ecoli</a> | <a href="#">rs5_ecoli</a> |
| P0A7W1 | RS5_ECOLI | * | P0AF67 | P0A7W1 | <a href="#">yjee_ecoli</a> | <a href="#">rs5_ecoli</a> |
| P0A7W1 | RS5_ECOLI | * | P76562 | P0A7W1 | <a href="#">ypfi_ecoli</a> | <a href="#">rs5_ecoli</a> |
| P0A7W1 | RS5_ECOLI | * | P0A9X1 | P0A7W1 | <a href="#">znuc_ecoli</a> | <a href="#">rs5_ecoli</a> |
|        |           |   |        |        |                            |                           |
| P02358 | RS6_ECOLI | * | P0A6A8 | P02358 | <a href="#">acp_ecoli</a>  | <a href="#">rs6_ecoli</a> |
| P02358 | RS6_ECOLI | * | P33224 | P02358 | <a href="#">aidb_ecoli</a> | <a href="#">rs6_ecoli</a> |
| P02358 | RS6_ECOLI | * | P0ACN4 | P02358 | <a href="#">allr_ecoli</a> | <a href="#">rs6_ecoli</a> |
| P02358 | RS6_ECOLI | * | P0ABH9 | P02358 | <a href="#">clpa_ecoli</a> | <a href="#">rs6_ecoli</a> |
| P02358 | RS6_ECOLI | * | P0A6G7 | P02358 | <a href="#">clpp_ecoli</a> | <a href="#">rs6_ecoli</a> |
| P02358 | RS6_ECOLI | * | P0A9Y6 | P02358 | <a href="#">cspc_ecoli</a> | <a href="#">rs6_ecoli</a> |
| P02358 | RS6_ECOLI | * | P0A9P6 | P02358 | <a href="#">dead_ecoli</a> | <a href="#">rs6_ecoli</a> |
| P02358 | RS6_ECOLI | * | P08622 | P02358 | <a href="#">dnaj_ecoli</a> | <a href="#">rs6_ecoli</a> |
| P02358 | RS6_ECOLI | * | P0ABT2 | P02358 | <a href="#">dps_ecoli</a>  | <a href="#">rs6_ecoli</a> |

|        |           |   |        |        |            |           |
|--------|-----------|---|--------|--------|------------|-----------|
| P02358 | RS6_ECOLI | * | P06616 | P02358 | era_ecoli  | rs6_ecoli |
| P02358 | RS6_ECOLI | * | P0ADH5 | P02358 | fimb_ecoli | rs6_ecoli |
| P02358 | RS6_ECOLI | * | P63228 | P02358 | gmhb_ecoli | rs6_ecoli |
| P02358 | RS6_ECOLI | * | P0A6X3 | P02358 | hfq_ecoli  | rs6_ecoli |
| P02358 | RS6_ECOLI | * | P0ABS8 | P02358 | hole_ecoli | rs6_ecoli |
| P02358 | RS6_ECOLI | * | P0A6Z3 | P02358 | htpg_ecoli | rs6_ecoli |
| P02358 | RS6_ECOLI | * | P0C054 | P02358 | ibpa_ecoli | rs6_ecoli |
| P02358 | RS6_ECOLI | * | P16528 | P02358 | iclr_ecoli | rs6_ecoli |
| P02358 | RS6_ECOLI | * | P0A6Y1 | P02358 | ihfb_ecoli | rs6_ecoli |
| P02358 | RS6_ECOLI | * | P60785 | P02358 | lepa_ecoli | rs6_ecoli |
| P02358 | RS6_ECOLI | * | P25522 | P02358 | mnme_ecoli | rs6_ecoli |
| P02358 | RS6_ECOLI | * | P0A9X4 | P02358 | mreb_ecoli | rs6_ecoli |
| P02358 | RS6_ECOLI | * | P68739 | P02358 | nfi_ecoli  | rs6_ecoli |
| P02358 | RS6_ECOLI | * | P0AFG0 | P02358 | nusg_ecoli | rs6_ecoli |
| P02358 | RS6_ECOLI | * | P0A799 | P02358 | pgk_ecoli  | rs6_ecoli |
| P02358 | RS6_ECOLI | * | P69405 | P02358 | rcsa_ecoli | rs6_ecoli |
| P02358 | RS6_ECOLI | * | P0A8J8 | P02358 | rhlb_ecoli | rs6_ecoli |
| P02358 | RS6_ECOLI | * | P36979 | P02358 | rlmn_ecoli | rs6_ecoli |
| P02358 | RS6_ECOLI | * | P37765 | P02358 | rlub_ecoli | rs6_ecoli |
| P02358 | RS6_ECOLI | * | P0AA39 | P02358 | rluc_ecoli | rs6_ecoli |
| P02358 | RS6_ECOLI | * | P21513 | P02358 | rne_ecoli  | rs6_ecoli |
| P02358 | RS6_ECOLI | * | P0A7Y8 | P02358 | rnpa_ecoli | rs6_ecoli |
| P02358 | RS6_ECOLI | * | P21499 | P02358 | rnrc_ecoli | rs6_ecoli |
| P02358 | RS6_ECOLI | * | P21499 | P02358 | rnrc_ecoli | rs6_ecoli |
| P02358 | RS6_ECOLI | * | P0A7Z4 | P02358 | rpoa_ecoli | rs6_ecoli |
| P02358 | RS6_ECOLI | * | P0A8V2 | P02358 | rpob_ecoli | rs6_ecoli |
| P02358 | RS6_ECOLI | * | P00579 | P02358 | rpod_ecoli | rs6_ecoli |
| P02358 | RS6_ECOLI | * | P0A776 | P02358 | rpph_ecoli | rs6_ecoli |
| P02358 | RS6_ECOLI | * | P14081 | P02358 | selb_ecoli | rs6_ecoli |
| P02358 | RS6_ECOLI | * | P0AG24 | P02358 | spot_ecoli | rs6_ecoli |
| P02358 | RS6_ECOLI | * | P0A8M3 | P02358 | syt_ecoli  | rs6_ecoli |
| P02358 | RS6_ECOLI | * | P0A8I5 | P02358 | trmb_ecoli | rs6_ecoli |
| P02358 | RS6_ECOLI | * | P0A8G0 | P02358 | uvrc_ecoli | rs6_ecoli |
| P02358 | RS6_ECOLI | * | P03018 | P02358 | uvrd_ecoli | rs6_ecoli |
| P02358 | RS6_ECOLI | * | P0A8E5 | P02358 | yacl_ecoli | rs6_ecoli |
| P02358 | RS6_ECOLI | * | P0AAS7 | P02358 | ybcj_ecoli | rs6_ecoli |
| P02358 | RS6_ECOLI | * | P75767 | P02358 | ybhk_ecoli | rs6_ecoli |
| P02358 | RS6_ECOLI | * | P75829 | P02358 | ybjx_ecoli | rs6_ecoli |
| P02358 | RS6_ECOLI | * | P0AGJ5 | P02358 | yfif_ecoli | rs6_ecoli |
| P02358 | RS6_ECOLI | * | P0AGJ5 | P02358 | yfif_ecoli | rs6_ecoli |
| P02359 | RS7_ECOLI | * | P0A6A8 | P02359 | acp_ecoli  | rs7_ecoli |
| P02359 | RS7_ECOLI | * | P0A6A8 | P02359 | acp_ecoli  | rs7_ecoli |
| P02359 | RS7_ECOLI | * | P24224 | P02359 | acps_ecoli | rs7_ecoli |
| P02359 | RS7_ECOLI | * | P06134 | P02359 | ada_ecoli  | rs7_ecoli |

|        |           |   |        |        |            |           |
|--------|-----------|---|--------|--------|------------|-----------|
| P02359 | RS7_ECOLI | * | P33224 | P02359 | aidb_ecoli | rs7_ecoli |
| P02359 | RS7_ECOLI | * | P0ACN4 | P02359 | allr_ecoli | rs7_ecoli |
| P02359 | RS7_ECOLI | * | P36659 | P02359 | cbpa_ecoli | rs7_ecoli |
| P02359 | RS7_ECOLI | * | P36659 | P02359 | cbpa_ecoli | rs7_ecoli |
| P02359 | RS7_ECOLI | * | P31469 | P02359 | cbrc_ecoli | rs7_ecoli |
| P02359 | RS7_ECOLI | * | P0ABH9 | P02359 | clpa_ecoli | rs7_ecoli |
| P02359 | RS7_ECOLI | * | P0ABH9 | P02359 | clpa_ecoli | rs7_ecoli |
| P02359 | RS7_ECOLI | * | P63284 | P02359 | clpb_ecoli | rs7_ecoli |
| P02359 | RS7_ECOLI | * | P0A6G7 | P02359 | clpp_ecoli | rs7_ecoli |
| P02359 | RS7_ECOLI | * | P0A6G7 | P02359 | clpp_ecoli | rs7_ecoli |
| P02359 | RS7_ECOLI | * | P0A9X9 | P02359 | cspa_ecoli | rs7_ecoli |
| P02359 | RS7_ECOLI | * | P0A9X9 | P02359 | cspa_ecoli | rs7_ecoli |
| P02359 | RS7_ECOLI | * | P36995 | P02359 | cspb_ecoli | rs7_ecoli |
| P02359 | RS7_ECOLI | * | P0A9Y6 | P02359 | cspc_ecoli | rs7_ecoli |
| P02359 | RS7_ECOLI | * | P0A9Y6 | P02359 | cspc_ecoli | rs7_ecoli |
| P02359 | RS7_ECOLI | * | P0A9Y6 | P02359 | cspc_ecoli | rs7_ecoli |
| P02359 | RS7_ECOLI | * | P0A968 | P02359 | cspd_ecoli | rs7_ecoli |
| P02359 | RS7_ECOLI | * | P0A968 | P02359 | cspd_ecoli | rs7_ecoli |
| P02359 | RS7_ECOLI | * | P0A972 | P02359 | cspe_ecoli | rs7_ecoli |
| P02359 | RS7_ECOLI | * | P0A972 | P02359 | cspe_ecoli | rs7_ecoli |
| P02359 | RS7_ECOLI | * | P0A972 | P02359 | cspe_ecoli | rs7_ecoli |
| P02359 | RS7_ECOLI | * | P0A978 | P02359 | cspg_ecoli | rs7_ecoli |
| P02359 | RS7_ECOLI | * | P0A986 | P02359 | cspi_ecoli | rs7_ecoli |
| P02359 | RS7_ECOLI | * | P0ACF4 | P02359 | dbhb_ecoli | rs7_ecoli |
| P02359 | RS7_ECOLI | * | P0ACF4 | P02359 | dbhb_ecoli | rs7_ecoli |
| P02359 | RS7_ECOLI | * | P0AED9 | P02359 | dcm_ecoli  | rs7_ecoli |
| P02359 | RS7_ECOLI | * | P0A9P6 | P02359 | dead_ecoli | rs7_ecoli |
| P02359 | RS7_ECOLI | * | P0A9P6 | P02359 | dead_ecoli | rs7_ecoli |
| P02359 | RS7_ECOLI | * | P0AEE8 | P02359 | dma_ecoli  | rs7_ecoli |
| P02359 | RS7_ECOLI | * | P03004 | P02359 | dnaa_ecoli | rs7_ecoli |
| P02359 | RS7_ECOLI | * | P03004 | P02359 | dnaa_ecoli | rs7_ecoli |
| P02359 | RS7_ECOLI | * | P33371 | P02359 | duhc_ecoli | rs7_ecoli |
| P02359 | RS7_ECOLI | * | P0A6Q3 | P02359 | faba_ecoli | rs7_ecoli |
| P02359 | RS7_ECOLI | * | P0A6Q6 | P02359 | fabz_ecoli | rs7_ecoli |
| P02359 | RS7_ECOLI | * | P13024 | P02359 | fdhe_ecoli | rs7_ecoli |
| P02359 | RS7_ECOLI | * | P0ADH5 | P02359 | fimb_ecoli | rs7_ecoli |
| P02359 | RS7_ECOLI | * | P0ADH5 | P02359 | fimb_ecoli | rs7_ecoli |
| P02359 | RS7_ECOLI | * | P23882 | P02359 | fmt_ecoli  | rs7_ecoli |
| P02359 | RS7_ECOLI | * | P0A9R7 | P02359 | ftse_ecoli | rs7_ecoli |
| P02359 | RS7_ECOLI | * | P0AAI3 | P02359 | ftsh_ecoli | rs7_ecoli |
| P02359 | RS7_ECOLI | * | P0ACC7 | P02359 | glmu_ecoli | rs7_ecoli |
| P02359 | RS7_ECOLI | * | P0A6W5 | P02359 | grea_ecoli | rs7_ecoli |
| P02359 | RS7_ECOLI | * | P09372 | P02359 | grpe_ecoli | rs7_ecoli |
| P02359 | RS7_ECOLI | * | P15038 | P02359 | held_ecoli | rs7_ecoli |
| P02359 | RS7_ECOLI | * | P0A6X3 | P02359 | hfq_ecoli  | rs7_ecoli |



|        |           |   |        |        |            |           |
|--------|-----------|---|--------|--------|------------|-----------|
| P02359 | RS7_ECOLI | * | P67910 | P02359 | hldd_ecoli | rs7_ecoli |
| P02359 | RS7_ECOLI | * | P67910 | P02359 | hldd_ecoli | rs7_ecoli |
| P02359 | RS7_ECOLI | * | P43329 | P02359 | hrpa_ecoli | rs7_ecoli |
| P02359 | RS7_ECOLI | * | P0A6L9 | P02359 | hscb_ecoli | rs7_ecoli |
| P02359 | RS7_ECOLI | * | P0A6Y5 | P02359 | hslo_ecoli | rs7_ecoli |
| P02359 | RS7_ECOLI | * | P0ACG8 | P02359 | hslr_ecoli | rs7_ecoli |
| P02359 | RS7_ECOLI | * | P0A6H5 | P02359 | hslu_ecoli | rs7_ecoli |
| P02359 | RS7_ECOLI | * | P0A7B8 | P02359 | hslv_ecoli | rs7_ecoli |
| P02359 | RS7_ECOLI | * | P0A6Z3 | P02359 | htpg_ecoli | rs7_ecoli |
| P02359 | RS7_ECOLI | * | P0AAM3 | P02359 | hypc_ecoli | rs7_ecoli |
| P02359 | RS7_ECOLI | * | P0C054 | P02359 | ibpa_ecoli | rs7_ecoli |
| P02359 | RS7_ECOLI | * | P16528 | P02359 | iclr_ecoli | rs7_ecoli |
| P02359 | RS7_ECOLI | * | P0A6Y1 | P02359 | ihfb_ecoli | rs7_ecoli |
| P02359 | RS7_ECOLI | * | P32053 | P02359 | inta_ecoli | rs7_ecoli |
| P02359 | RS7_ECOLI | * | P0A7A9 | P02359 | ipyr_ecoli | rs7_ecoli |
| P02359 | RS7_ECOLI | * | P0A715 | P02359 | kdsa_ecoli | rs7_ecoli |
| P02359 | RS7_ECOLI | * | P60785 | P02359 | lepa_ecoli | rs7_ecoli |
| P02359 | RS7_ECOLI | * | P0A9M0 | P02359 | lon_ecoli  | rs7_ecoli |
| P02359 | RS7_ECOLI | * | P21645 | P02359 | lpxd_ecoli | rs7_ecoli |
| P02359 | RS7_ECOLI | * | P21645 | P02359 | lpxd_ecoli | rs7_ecoli |
| P02359 | RS7_ECOLI | * | P21645 | P02359 | lpxd_ecoli | rs7_ecoli |
| P02359 | RS7_ECOLI | * | P77791 | P02359 | maa_ecoli  | rs7_ecoli |
| P02359 | RS7_ECOLI | * | P25522 | P02359 | mnme_ecoli | rs7_ecoli |
| P02359 | RS7_ECOLI | * | P30745 | P02359 | moaa_ecoli | rs7_ecoli |
| P02359 | RS7_ECOLI | * | P25738 | P02359 | msyb_ecoli | rs7_ecoli |
| P02359 | RS7_ECOLI | * | P22523 | P02359 | mukb_ecoli | rs7_ecoli |
| P02359 | RS7_ECOLI | * | P68739 | P02359 | nfi_ecoli  | rs7_ecoli |
| P02359 | RS7_ECOLI | * | P33594 | P02359 | nike_ecoli | rs7_ecoli |
| P02359 | RS7_ECOLI | * | P0AFF6 | P02359 | nusa_ecoli | rs7_ecoli |
| P02359 | RS7_ECOLI | * | P0AFF6 | P02359 | nusa_ecoli | rs7_ecoli |
| P02359 | RS7_ECOLI | * | P0AFG0 | P02359 | nusg_ecoli | rs7_ecoli |
| P02359 | RS7_ECOLI | * | P76086 | P02359 | paax_ecoli | rs7_ecoli |
| P02359 | RS7_ECOLI | * | P0A9K3 | P02359 | phol_ecoli | rs7_ecoli |
| P02359 | RS7_ECOLI | * | P0A9K3 | P02359 | phol_ecoli | rs7_ecoli |
| P02359 | RS7_ECOLI | * | P05055 | P02359 | pnp_ecoli  | rs7_ecoli |
| P02359 | RS7_ECOLI | * | P05055 | P02359 | pnp_ecoli  | rs7_ecoli |
| P02359 | RS7_ECOLI | * | P0A9L5 | P02359 | ppic_ecoli | rs7_ecoli |
| P02359 | RS7_ECOLI | * | P07013 | P02359 | prib_ecoli | rs7_ecoli |
| P02359 | RS7_ECOLI | * | P23862 | P02359 | pric_ecoli | rs7_ecoli |
| P02359 | RS7_ECOLI | * | P0ABS5 | P02359 | prim_ecoli | rs7_ecoli |
| P02359 | RS7_ECOLI | * | P0A8T1 | P02359 | prma_ecoli | rs7_ecoli |
| P02359 | RS7_ECOLI | * | P23830 | P02359 | pss_ecoli  | rs7_ecoli |
| P02359 | RS7_ECOLI | * | P0A7E9 | P02359 | pyrh_ecoli | rs7_ecoli |
| P02359 | RS7_ECOLI | * | P69405 | P02359 | rca_ecoli  | rs7_ecoli |
| P02359 | RS7_ECOLI | * | P24230 | P02359 | recg_ecoli | rs7_ecoli |



|        |           |          |        |            |           |
|--------|-----------|----------|--------|------------|-----------|
| P02359 | RS7_ECOLI | * P0A7H3 | P02359 | reco_ecoli | rs7_ecoli |
| P02359 | RS7_ECOLI | * P37692 | P02359 | rfaf_ecoli | rs7_ecoli |
| P02359 | RS7_ECOLI | * P0A8J8 | P02359 | rhlb_ecoli | rs7_ecoli |
| P02359 | RS7_ECOLI | * P0A8J8 | P02359 | rhlb_ecoli | rs7_ecoli |
| P02359 | RS7_ECOLI | * P25888 | P02359 | rhle_ecoli | rs7_ecoli |
| P02359 | RS7_ECOLI | * P25539 | P02359 | ribd_ecoli | rs7_ecoli |
| P02359 | RS7_ECOLI | * P0A8A8 | P02359 | rimp_ecoli | rs7_ecoli |
| P02359 | RS7_ECOLI | * P63177 | P02359 | rlmb_ecoli | rs7_ecoli |
| P02359 | RS7_ECOLI | * P0C0R7 | P02359 | rlme_ecoli | rs7_ecoli |
| P02359 | RS7_ECOLI | * P75864 | P02359 | rlml_ecoli | rs7_ecoli |
| P02359 | RS7_ECOLI | * P0ADR6 | P02359 | rlmm_ecoli | rs7_ecoli |
| P02359 | RS7_ECOLI | * P36979 | P02359 | rlmn_ecoli | rs7_ecoli |
| P02359 | RS7_ECOLI | * P36979 | P02359 | rlmn_ecoli | rs7_ecoli |
| P02359 | RS7_ECOLI | * P37765 | P02359 | rlub_ecoli | rs7_ecoli |
| P02359 | RS7_ECOLI | * P37765 | P02359 | rlub_ecoli | rs7_ecoli |
| P02359 | RS7_ECOLI | * P0AA39 | P02359 | rluc_ecoli | rs7_ecoli |
| P02359 | RS7_ECOLI | * P0AA39 | P02359 | rluc_ecoli | rs7_ecoli |
| P02359 | RS7_ECOLI | * P0AA39 | P02359 | rluc_ecoli | rs7_ecoli |
| P02359 | RS7_ECOLI | * P32684 | P02359 | rluf_ecoli | rs7_ecoli |
| P02359 | RS7_ECOLI | * P21513 | P02359 | rne_ecoli  | rs7_ecoli |
| P02359 | RS7_ECOLI | * P21513 | P02359 | rne_ecoli  | rs7_ecoli |
| P02359 | RS7_ECOLI | * P0A7Y8 | P02359 | rnpa_ecoli | rs7_ecoli |
| P02359 | RS7_ECOLI | * P0A7Y8 | P02359 | rnpa_ecoli | rs7_ecoli |
| P02359 | RS7_ECOLI | * P21499 | P02359 | rnrc_ecoli | rs7_ecoli |
| P02359 | RS7_ECOLI | * P21499 | P02359 | rnrc_ecoli | rs7_ecoli |
| P02359 | RS7_ECOLI | * P0A7Z4 | P02359 | rpoa_ecoli | rs7_ecoli |
| P02359 | RS7_ECOLI | * P0A8T7 | P02359 | rpoc_ecoli | rs7_ecoli |
| P02359 | RS7_ECOLI | * P0A8T7 | P02359 | rpoc_ecoli | rs7_ecoli |
| P02359 | RS7_ECOLI | * P00579 | P02359 | rpod_ecoli | rs7_ecoli |
| P02359 | RS7_ECOLI | * P00579 | P02359 | rpod_ecoli | rs7_ecoli |
| P02359 | RS7_ECOLI | * P0A800 | P02359 | rpoz_ecoli | rs7_ecoli |
| P02359 | RS7_ECOLI | * P0A776 | P02359 | rpph_ecoli | rs7_ecoli |
| P02359 | RS7_ECOLI | * P0A776 | P02359 | rpph_ecoli | rs7_ecoli |
| P02359 | RS7_ECOLI | * P39286 | P02359 | rsga_ecoli | rs7_ecoli |
| P02359 | RS7_ECOLI | * P36929 | P02359 | rsmb_ecoli | rs7_ecoli |
| P02359 | RS7_ECOLI | * P39406 | P02359 | rsmc_ecoli | rs7_ecoli |
| P02359 | RS7_ECOLI | * P0ACU2 | P02359 | rutr_ecoli | rs7_ecoli |
| P02359 | RS7_ECOLI | * P14081 | P02359 | selb_ecoli | rs7_ecoli |
| P02359 | RS7_ECOLI | * P21170 | P02359 | spea_ecoli | rs7_ecoli |
| P02359 | RS7_ECOLI | * P0AG24 | P02359 | spot_ecoli | rs7_ecoli |
| P02359 | RS7_ECOLI | * P0AG24 | P02359 | spot_ecoli | rs7_ecoli |
| P02359 | RS7_ECOLI | * P0AFZ3 | P02359 | sspb_ecoli | rs7_ecoli |
| P02359 | RS7_ECOLI | * P0A8M3 | P02359 | syt_ecoli  | rs7_ecoli |
| P02359 | RS7_ECOLI | * P0A847 | P02359 | tgt_ecoli  | rs7_ecoli |
| P02359 | RS7_ECOLI | * P0A850 | P02359 | tig_ecoli  | rs7_ecoli |

|        |           |   |        |        |            |           |
|--------|-----------|---|--------|--------|------------|-----------|
| P02359 | RS7_ECOLI | * | P0A850 | P02359 | tig_ecoli  | rs7_ecoli |
| P02359 | RS7_ECOLI | * | P52097 | P02359 | tils_ecoli | rs7_ecoli |
| P02359 | RS7_ECOLI | * | P0A8I5 | P02359 | trmb_ecoli | rs7_ecoli |
| P02359 | RS7_ECOLI | * | P0A8I5 | P02359 | trmb_ecoli | rs7_ecoli |
| P02359 | RS7_ECOLI | * | P0AGJ2 | P02359 | trmh_ecoli | rs7_ecoli |
| P02359 | RS7_ECOLI | * | P0A9W0 | P02359 | ular_ecoli | rs7_ecoli |
| P02359 | RS7_ECOLI | * | P0A8G0 | P02359 | uvrc_ecoli | rs7_ecoli |
| P02359 | RS7_ECOLI | * | P0A8G0 | P02359 | uvrc_ecoli | rs7_ecoli |
| P02359 | RS7_ECOLI | * | P03018 | P02359 | uvrd_ecoli | rs7_ecoli |
| P02359 | RS7_ECOLI | * | P71242 | P02359 | wcak_ecoli | rs7_ecoli |
| P02359 | RS7_ECOLI | * | P40711 | P02359 | yaej_ecoli | rs7_ecoli |
| P02359 | RS7_ECOLI | * | P75767 | P02359 | ybhk_ecoli | rs7_ecoli |
| P02359 | RS7_ECOLI | * | P75829 | P02359 | ybjx_ecoli | rs7_ecoli |
| P02359 | RS7_ECOLI | * | P75829 | P02359 | ybjx_ecoli | rs7_ecoli |
| P02359 | RS7_ECOLI | * | P08245 | P02359 | ycih_ecoli | rs7_ecoli |
| P02359 | RS7_ECOLI | * | P76104 | P02359 | ydcg_ecoli | rs7_ecoli |
| P02359 | RS7_ECOLI | * | P0ACX9 | P02359 | ydie_ecoli | rs7_ecoli |
| P02359 | RS7_ECOLI | * | P64476 | P02359 | ydhc_ecoli | rs7_ecoli |
| P02359 | RS7_ECOLI | * | P0AD05 | P02359 | yeca_ecoli | rs7_ecoli |
| P02359 | RS7_ECOLI | * | P0AGJ5 | P02359 | yfif_ecoli | rs7_ecoli |
| P02359 | RS7_ECOLI | * | P0AGJ5 | P02359 | yfif_ecoli | rs7_ecoli |
| P02359 | RS7_ECOLI | * | P52119 | P02359 | yfjf_ecoli | rs7_ecoli |
| P02359 | RS7_ECOLI | * | Q46927 | P02359 | ygdh_ecoli | rs7_ecoli |
| P02359 | RS7_ECOLI | * | P0ADT5 | P02359 | ygie_ecoli | rs7_ecoli |
| P02359 | RS7_ECOLI | * | P0AGK4 | P02359 | yhby_ecoli | rs7_ecoli |
| P02359 | RS7_ECOLI | * | P64616 | P02359 | yhco_ecoli | rs7_ecoli |
| P02359 | RS7_ECOLI | * | P0ADK8 | P02359 | yibl_ecoli | rs7_ecoli |
| P02359 | RS7_ECOLI | * | P0A8H6 | P02359 | yihc_ecoli | rs7_ecoli |
| P02359 | RS7_ECOLI | * | P32680 | P02359 | yjag_ecoli | rs7_ecoli |
| P02359 | RS7_ECOLI | * | P0ACV8 | P02359 | ymja_ecoli | rs7_ecoli |
| P02359 | RS7_ECOLI | * | P76148 | P02359 | yneg_ecoli | rs7_ecoli |
|        |           |   |        |        |            |           |
| P0A7W7 | RS8_ECOLI | * | P0A6A8 | P0A7W7 | acp_ecoli  | rs8_ecoli |
| P0A7W7 | RS8_ECOLI | * | P63284 | P0A7W7 | clpb_ecoli | rs8_ecoli |
| P0A7W7 | RS8_ECOLI | * | P0A9P6 | P0A7W7 | dead_ecoli | rs8_ecoli |
| P0A7W7 | RS8_ECOLI | * | P0ABT2 | P0A7W7 | dps_ecoli  | rs8_ecoli |
| P0A7W7 | RS8_ECOLI | * | P0ADH5 | P0A7W7 | fimb_ecoli | rs8_ecoli |
| P0A7W7 | RS8_ECOLI | * | P16528 | P0A7W7 | iclr_ecoli | rs8_ecoli |
| P0A7W7 | RS8_ECOLI | * | P0A6Y1 | P0A7W7 | ihfb_ecoli | rs8_ecoli |
| P0A7W7 | RS8_ECOLI | * | P0A7A9 | P0A7W7 | ipyr_ecoli | rs8_ecoli |
| P0A7W7 | RS8_ECOLI | * | P0A9M0 | P0A7W7 | lon_ecoli  | rs8_ecoli |
| P0A7W7 | RS8_ECOLI | * | P21645 | P0A7W7 | lpxd_ecoli | rs8_ecoli |
| P0A7W7 | RS8_ECOLI | * | P0A7A7 | P0A7W7 | plsb_ecoli | rs8_ecoli |
| P0A7W7 | RS8_ECOLI | * | P0A7Y8 | P0A7W7 | rnpa_ecoli | rs8_ecoli |
| P0A7W7 | RS8_ECOLI | * | P0A7Y8 | P0A7W7 | rnpa_ecoli | rs8_ecoli |

|        |           |          |        |            |           |
|--------|-----------|----------|--------|------------|-----------|
| P0A7W7 | RS8_ECOLI | * P21499 | P0A7W7 | rnr_ecoli  | rs8_ecoli |
| P0A7W7 | RS8_ECOLI | * P0AG24 | P0A7W7 | spot_ecoli | rs8_ecoli |
| P0A7W7 | RS8_ECOLI | * P0A9W0 | P0A7W7 | ular_ecoli | rs8_ecoli |
| P0A7W7 | RS8_ECOLI | * P0A8G0 | P0A7W7 | uvrc_ecoli | rs8_ecoli |
| P0A7W7 | RS8_ECOLI | * P0AGJ5 | P0A7W7 | yfif_ecoli | rs8_ecoli |
| P0A7X3 | RS9_ECOLI | * P05050 | P0A7X3 | alkb_ecoli | rs9_ecoli |
| P0A7X3 | RS9_ECOLI | * P05052 | P0A7X3 | appy_ecoli | rs9_ecoli |
| P0A7X3 | RS9_ECOLI | * P77624 | P0A7X3 | arcm_ecoli | rs9_ecoli |
| P0A7X3 | RS9_ECOLI | * Q06065 | P0A7X3 | atoc_ecoli | rs9_ecoli |
| P0A7X3 | RS9_ECOLI | * P31469 | P0A7X3 | cbrc_ecoli | rs9_ecoli |
| P0A7X3 | RS9_ECOLI | * P06961 | P0A7X3 | cca_ecoli  | rs9_ecoli |
| P0A7X3 | RS9_ECOLI | * P76213 | P0A7X3 | cho_ecoli  | rs9_ecoli |
| P0A7X3 | RS9_ECOLI | * P0A8Q6 | P0A7X3 | clps_ecoli | rs9_ecoli |
| P0A7X3 | RS9_ECOLI | * P0A9X9 | P0A7X3 | cspa_ecoli | rs9_ecoli |
| P0A7X3 | RS9_ECOLI | * P0A9Y6 | P0A7X3 | cspc_ecoli | rs9_ecoli |
| P0A7X3 | RS9_ECOLI | * P0A972 | P0A7X3 | cspe_ecoli | rs9_ecoli |
| P0A7X3 | RS9_ECOLI | * P0A978 | P0A7X3 | cspg_ecoli | rs9_ecoli |
| P0A7X3 | RS9_ECOLI | * P0A986 | P0A7X3 | cspi_ecoli | rs9_ecoli |
| P0A7X3 | RS9_ECOLI | * P11557 | P0A7X3 | damx_ecoli | rs9_ecoli |
| P0A7X3 | RS9_ECOLI | * P0ACF4 | P0A7X3 | dbhb_ecoli | rs9_ecoli |
| P0A7X3 | RS9_ECOLI | * P0A9P6 | P0A7X3 | dead_ecoli | rs9_ecoli |
| P0A7X3 | RS9_ECOLI | * P00393 | P0A7X3 | dhna_ecoli | rs9_ecoli |
| P0A7X3 | RS9_ECOLI | * P27296 | P0A7X3 | ding_ecoli | rs9_ecoli |
| P0A7X3 | RS9_ECOLI | * P03004 | P0A7X3 | dnaa_ecoli | rs9_ecoli |
| P0A7X3 | RS9_ECOLI | * P03004 | P0A7X3 | dnaa_ecoli | rs9_ecoli |
| P0A7X3 | RS9_ECOLI | * P06616 | P0A7X3 | era_ecoli  | rs9_ecoli |
| P0A7X3 | RS9_ECOLI | * P76556 | P0A7X3 | eutp_ecoli | rs9_ecoli |
| P0A7X3 | RS9_ECOLI | * P0A6Q3 | P0A7X3 | faba_ecoli | rs9_ecoli |
| P0A7X3 | RS9_ECOLI | * P42593 | P0A7X3 | fadh_ecoli | rs9_ecoli |
| P0A7X3 | RS9_ECOLI | * P76503 | P0A7X3 | fadi_ecoli | rs9_ecoli |
| P0A7X3 | RS9_ECOLI | * P13024 | P0A7X3 | fdhe_ecoli | rs9_ecoli |
| P0A7X3 | RS9_ECOLI | * P0AEM0 | P0A7X3 | fbxb_ecoli | rs9_ecoli |
| P0A7X3 | RS9_ECOLI | * P23882 | P0A7X3 | fmt_ecoli  | rs9_ecoli |
| P0A7X3 | RS9_ECOLI | * P0A9R7 | P0A7X3 | ftse_ecoli | rs9_ecoli |
| P0A7X3 | RS9_ECOLI | * P29131 | P0A7X3 | ftsn_ecoli | rs9_ecoli |
| P0A7X3 | RS9_ECOLI | * P0A9S3 | P0A7X3 | gatd_ecoli | rs9_ecoli |
| P0A7X3 | RS9_ECOLI | * P0ACL5 | P0A7X3 | glcc_ecoli | rs9_ecoli |
| P0A7X3 | RS9_ECOLI | * P0ACC7 | P0A7X3 | glmu_ecoli | rs9_ecoli |
| P0A7X3 | RS9_ECOLI | * P30128 | P0A7X3 | greb_ecoli | rs9_ecoli |
| P0A7X3 | RS9_ECOLI | * P09372 | P0A7X3 | grpe_ecoli | rs9_ecoli |
| P0A7X3 | RS9_ECOLI | * P0A6Z1 | P0A7X3 | hsca_ecoli | rs9_ecoli |
| P0A7X3 | RS9_ECOLI | * P77319 | P0A7X3 | hscg_ecoli | rs9_ecoli |
| P0A7X3 | RS9_ECOLI | * P0ACV0 | P0A7X3 | htrb_ecoli | rs9_ecoli |
| P0A7X3 | RS9_ECOLI | * P0A8S1 | P0A7X3 | icia_ecoli | rs9_ecoli |

|        |           |          |        |            |           |
|--------|-----------|----------|--------|------------|-----------|
| P0A7X3 | RS9_ECOLI | * P24218 | P0A7X3 | intd_ecoli | rs9_ecoli |
| P0A7X3 | RS9_ECOLI | * P0A6B7 | P0A7X3 | iscs_ecoli | rs9_ecoli |
| P0A7X3 | RS9_ECOLI | * P0A715 | P0A7X3 | kdsa_ecoli | rs9_ecoli |
| P0A7X3 | RS9_ECOLI | * P60546 | P0A7X3 | kgua_ecoli | rs9_ecoli |
| P0A7X3 | RS9_ECOLI | * P0A722 | P0A7X3 | lpxa_ecoli | rs9_ecoli |
| P0A7X3 | RS9_ECOLI | * P21645 | P0A7X3 | lpxd_ecoli | rs9_ecoli |
| P0A7X3 | RS9_ECOLI | * P0ACH8 | P0A7X3 | melr_ecoli | rs9_ecoli |
| P0A7X3 | RS9_ECOLI | * P76346 | P0A7X3 | mtfa_ecoli | rs9_ecoli |
| P0A7X3 | RS9_ECOLI | * P0A9H1 | P0A7X3 | mug_ecoli  | rs9_ecoli |
| P0A7X3 | RS9_ECOLI | * P22523 | P0A7X3 | mukb_ecoli | rs9_ecoli |
| P0A7X3 | RS9_ECOLI | * P22524 | P0A7X3 | muke_ecoli | rs9_ecoli |
| P0A7X3 | RS9_ECOLI | * P17443 | P0A7X3 | murg_ecoli | rs9_ecoli |
| P0A7X3 | RS9_ECOLI | * P17802 | P0A7X3 | muty_ecoli | rs9_ecoli |
| P0A7X3 | RS9_ECOLI | * P75960 | P0A7X3 | npd_ecoli  | rs9_ecoli |
| P0A7X3 | RS9_ECOLI | * P0AFD1 | P0A7X3 | nuoe_ecoli | rs9_ecoli |
| P0A7X3 | RS9_ECOLI | * P0AFF6 | P0A7X3 | nusa_ecoli | rs9_ecoli |
| P0A7X3 | RS9_ECOLI | * P42641 | P0A7X3 | obg_ecoli  | rs9_ecoli |
| P0A7X3 | RS9_ECOLI | * P33136 | P0A7X3 | opgg_ecoli | rs9_ecoli |
| P0A7X3 | RS9_ECOLI | * P00914 | P0A7X3 | phr_ecoli  | rs9_ecoli |
| P0A7X3 | RS9_ECOLI | * P0A7A7 | P0A7X3 | plsb_ecoli | rs9_ecoli |
| P0A7X3 | RS9_ECOLI | * P37590 | P0A7X3 | pmrd_ecoli | rs9_ecoli |
| P0A7X3 | RS9_ECOLI | * P32155 | P0A7X3 | ptfa_ecoli | rs9_ecoli |
| P0A7X3 | RS9_ECOLI | * P37906 | P0A7X3 | puub_ecoli | rs9_ecoli |
| P0A7X3 | RS9_ECOLI | * P40719 | P0A7X3 | qsec_ecoli | rs9_ecoli |
| P0A7X3 | RS9_ECOLI | * P76062 | P0A7X3 | racr_ecoli | rs9_ecoli |
| P0A7X3 | RS9_ECOLI | * P24230 | P0A7X3 | recg_ecoli | rs9_ecoli |
| P0A7X3 | RS9_ECOLI | * P24173 | P0A7X3 | rfac_ecoli | rs9_ecoli |
| P0A7X3 | RS9_ECOLI | * P27241 | P0A7X3 | rfaz_ecoli | rs9_ecoli |
| P0A7X3 | RS9_ECOLI | * P25888 | P0A7X3 | rhle_ecoli | rs9_ecoli |
| P0A7X3 | RS9_ECOLI | * P77215 | P0A7X3 | rhmd_ecoli | rs9_ecoli |
| P0A7X3 | RS9_ECOLI | * P75864 | P0A7X3 | rlml_ecoli | rs9_ecoli |
| P0A7X3 | RS9_ECOLI | * P32684 | P0A7X3 | rluf_ecoli | rs9_ecoli |
| P0A7X3 | RS9_ECOLI | * P0A9J0 | P0A7X3 | rng_ecoli  | rs9_ecoli |
| P0A7X3 | RS9_ECOLI | * P0A9J0 | P0A7X3 | rng_ecoli  | rs9_ecoli |
| P0A7X3 | RS9_ECOLI | * P0A7Y4 | P0A7X3 | rnh_ecoli  | rs9_ecoli |
| P0A7X3 | RS9_ECOLI | * P0A7Y8 | P0A7X3 | rnpa_ecoli | rs9_ecoli |
| P0A7X3 | RS9_ECOLI | * P21499 | P0A7X3 | rnrc_ecoli | rs9_ecoli |
| P0A7X3 | RS9_ECOLI | * P0A776 | P0A7X3 | rpph_ecoli | rs9_ecoli |
| P0A7X3 | RS9_ECOLI | * P36929 | P0A7X3 | rsmb_ecoli | rs9_ecoli |
| P0A7X3 | RS9_ECOLI | * P39406 | P0A7X3 | rsmc_ecoli | rs9_ecoli |
| P0A7X3 | RS9_ECOLI | * P0AA43 | P0A7X3 | rsua_ecoli | rs9_ecoli |
| P0A7X3 | RS9_ECOLI | * P0ACU2 | P0A7X3 | rutr_ecoli | rs9_ecoli |
| P0A7X3 | RS9_ECOLI | * P14081 | P0A7X3 | selb_ecoli | rs9_ecoli |
| P0A7X3 | RS9_ECOLI | * P16456 | P0A7X3 | seld_ecoli | rs9_ecoli |
| P0A7X3 | RS9_ECOLI | * P0A9K9 | P0A7X3 | slyd_ecoli | rs9_ecoli |

|        |           |          |        |            |           |
|--------|-----------|----------|--------|------------|-----------|
| P0A7X3 | RS9_ECOLI | * P0ACS2 | P0A7X3 | soxr_ecoli | rs9_ecoli |
| P0A7X3 | RS9_ECOLI | * P0A9E2 | P0A7X3 | soxs_ecoli | rs9_ecoli |
| P0A7X3 | RS9_ECOLI | * P0AG24 | P0A7X3 | spot_ecoli | rs9_ecoli |
| P0A7X3 | RS9_ECOLI | * P0AFV4 | P0A7X3 | spr_ecoli  | rs9_ecoli |
| P0A7X3 | RS9_ECOLI | * P21507 | P0A7X3 | srmb_ecoli | rs9_ecoli |
| P0A7X3 | RS9_ECOLI | * P0A850 | P0A7X3 | tig_ecoli  | rs9_ecoli |
| P0A7X3 | RS9_ECOLI | * P0A850 | P0A7X3 | tig_ecoli  | rs9_ecoli |
| P0A7X3 | RS9_ECOLI | * P52097 | P0A7X3 | tils_ecoli | rs9_ecoli |
| P0A7X3 | RS9_ECOLI | * P36673 | P0A7X3 | trer_ecoli | rs9_ecoli |
| P0A7X3 | RS9_ECOLI | * P0AGJ2 | P0A7X3 | trmh_ecoli | rs9_ecoli |
| P0A7X3 | RS9_ECOLI | * P00895 | P0A7X3 | trpe_ecoli | rs9_ecoli |
| P0A7X3 | RS9_ECOLI | * P0A9W0 | P0A7X3 | ular_ecoli | rs9_ecoli |
| P0A7X3 | RS9_ECOLI | * P37903 | P0A7X3 | uspf_ecoli | rs9_ecoli |
| P0A7X3 | RS9_ECOLI | * P71242 | P0A7X3 | wcak_ecoli | rs9_ecoli |
| P0A7X3 | RS9_ECOLI | * P27836 | P0A7X3 | wecg_ecoli | rs9_ecoli |
| P0A7X3 | RS9_ECOLI | * P0AAB2 | P0A7X3 | wzb_ecoli  | rs9_ecoli |
| P0A7X3 | RS9_ECOLI | * P0A8P8 | P0A7X3 | xerd_ecoli | rs9_ecoli |
| P0A7X3 | RS9_ECOLI | * P21514 | P0A7X3 | yaha_ecoli | rs9_ecoli |
| P0A7X3 | RS9_ECOLI | * P0AAS7 | P0A7X3 | ybcj_ecoli | rs9_ecoli |
| P0A7X3 | RS9_ECOLI | * P0AB28 | P0A7X3 | yced_ecoli | rs9_ecoli |
| P0A7X3 | RS9_ECOLI | * P27431 | P0A7X3 | ycfd_ecoli | rs9_ecoli |
| P0A7X3 | RS9_ECOLI | * P75991 | P0A7X3 | ycgz_ecoli | rs9_ecoli |
| P0A7X3 | RS9_ECOLI | * P37052 | P0A7X3 | ychj_ecoli | rs9_ecoli |
| P0A7X3 | RS9_ECOLI | * P21361 | P0A7X3 | ycig_ecoli | rs9_ecoli |
| P0A7X3 | RS9_ECOLI | * P0ACX5 | P0A7X3 | ydhz_ecoli | rs9_ecoli |
| P0A7X3 | RS9_ECOLI | * P0ACX9 | P0A7X3 | ydie_ecoli | rs9_ecoli |
| P0A7X3 | RS9_ECOLI | * P76241 | P0A7X3 | yeam_ecoli | rs9_ecoli |
| P0A7X3 | RS9_ECOLI | * P0A8A0 | P0A7X3 | yebc_ecoli | rs9_ecoli |
| P0A7X3 | RS9_ECOLI | * P0AD05 | P0A7X3 | yeca_ecoli | rs9_ecoli |
| P0A7X3 | RS9_ECOLI | * P0AD07 | P0A7X3 | yecf_ecoli | rs9_ecoli |
| P0A7X3 | RS9_ECOLI | * P0AA31 | P0A7X3 | yedf_ecoli | rs9_ecoli |
| P0A7X3 | RS9_ECOLI | * P0A8A2 | P0A7X3 | yeen_ecoli | rs9_ecoli |
| P0A7X3 | RS9_ECOLI | * P76396 | P0A7X3 | yegl_ecoli | rs9_ecoli |
| P0A7X3 | RS9_ECOLI | * P52119 | P0A7X3 | yfjf_ecoli | rs9_ecoli |
| P0A7X3 | RS9_ECOLI | * P55734 | P0A7X3 | ygap_ecoli | rs9_ecoli |
| P0A7X3 | RS9_ECOLI | * P76632 | P0A7X3 | ygck_ecoli | rs9_ecoli |
| P0A7X3 | RS9_ECOLI | * Q46905 | P0A7X3 | ygco_ecoli | rs9_ecoli |
| P0A7X3 | RS9_ECOLI | * P67080 | P0A7X3 | yggg_ecoli | rs9_ecoli |
| P0A7X3 | RS9_ECOLI | * P0ADT5 | P0A7X3 | ygic_ecoli | rs9_ecoli |
| P0A7X3 | RS9_ECOLI | * P63417 | P0A7X3 | yhbs_ecoli | rs9_ecoli |
| P0A7X3 | RS9_ECOLI | * P64616 | P0A7X3 | yhco_ecoli | rs9_ecoli |
| P0A7X3 | RS9_ECOLI | * P0A8H6 | P0A7X3 | yihi_ecoli | rs9_ecoli |
| P0A7X3 | RS9_ECOLI | * P32680 | P0A7X3 | yjag_ecoli | rs9_ecoli |
| P0A7X3 | RS9_ECOLI | * P39360 | P0A7X3 | yjhi_ecoli | rs9_ecoli |
| P0A7X3 | RS9_ECOLI | * P75675 | P0A7X3 | ykfj_ecoli | rs9_ecoli |



|        |            |          |        |            |            |
|--------|------------|----------|--------|------------|------------|
| P0A7X3 | RS9_ECOLI  | * P75992 | P0A7X3 | ymga_ecoli | rs9_ecoli  |
| P06992 | RSMA_ECOLI | * P0ACZ8 | P06992 | cusr_ecoli | rsma_ecoli |
| P36929 | RSMB_ECOLI | * P0A9Y6 | P36929 | cspc_ecoli | rsmb_ecoli |
| P36929 | RSMB_ECOLI | * P77445 | P36929 | eute_ecoli | rsmb_ecoli |
| P39406 | RSMC_ECOLI | * P0AE52 | P39406 | bcp_ecoli  | rsmc_ecoli |
| P39406 | RSMC_ECOLI | * P0A7F9 | P39406 | quea_ecoli | rsmc_ecoli |
| P0ADX9 | RSMD_ECOLI | * P0A9R7 | P0ADX9 | ftse_ecoli | rsmd_ecoli |
| P0AGL7 | RSME_ECOLI | * P0A8W5 | P0AGL7 | yqge_ecoli | rsme_ecoli |
| P76273 | RSMF_ECOLI | none     |        |            |            |
| P60390 | RSMH_ECOLI | * P37634 | P60390 | yhir_ecoli | rsmh_ecoli |
| P67087 | RSMI_ECOLI | none     |        |            |            |
| P52108 | RSTA_ECOLI | * Q47538 | P52108 | taub_ecoli | rsta_ecoli |
| P52108 | RSTA_ECOLI | * P06612 | P52108 | top1_ecoli | rsta_ecoli |
| P0AA43 | RSUA_ECOLI | * P52697 | P0AA43 | 6pgl_ecoli | rsua_ecoli |
| P0AA43 | RSUA_ECOLI | * P0A9Q7 | P0AA43 | adhe_ecoli | rsua_ecoli |
| P0AA43 | RSUA_ECOLI | * P04825 | P0AA43 | ampn_ecoli | rsua_ecoli |
| P0AA43 | RSUA_ECOLI | * P0A6E1 | P0AA43 | arol_ecoli | rsua_ecoli |
| P0AA43 | RSUA_ECOLI | * P30843 | P0AA43 | basr_ecoli | rsua_ecoli |
| P0AA43 | RSUA_ECOLI | * P12999 | P0AA43 | bioc_ecoli | rsua_ecoli |
| P0AA43 | RSUA_ECOLI | * P17315 | P0AA43 | cira_ecoli | rsua_ecoli |
| P0AA43 | RSUA_ECOLI | * P76250 | P0AA43 | dmlr_ecoli | rsua_ecoli |
| P0AA43 | RSUA_ECOLI | * P0ABZ1 | P0AA43 | flig_ecoli | rsua_ecoli |
| P0AA43 | RSUA_ECOLI | * P31068 | P0AA43 | flih_ecoli | rsua_ecoli |
| P0AA43 | RSUA_ECOLI | * P52614 | P0AA43 | flik_ecoli | rsua_ecoli |
| P0AA43 | RSUA_ECOLI | * P52627 | P0AA43 | fliz_ecoli | rsua_ecoli |
| P0AA43 | RSUA_ECOLI | * P09147 | P0AA43 | gale_ecoli | rsua_ecoli |
| P0AA43 | RSUA_ECOLI | * P25748 | P0AA43 | gals_ecoli | rsua_ecoli |
| P0AA43 | RSUA_ECOLI | * P51020 | P0AA43 | hoa_ecoli  | rsua_ecoli |
| P0AA43 | RSUA_ECOLI | * P77397 | P0AA43 | mhpa_ecoli | rsua_ecoli |
| P0AA43 | RSUA_ECOLI | * P77569 | P0AA43 | mhpr_ecoli | rsua_ecoli |
| P0AA43 | RSUA_ECOLI | * P0AF20 | P0AA43 | nagc_ecoli | rsua_ecoli |
| P0AA43 | RSUA_ECOLI | * P75864 | P0AA43 | rlml_ecoli | rsua_ecoli |
| P0AA43 | RSUA_ECOLI | * P0A836 | P0AA43 | succ_ecoli | rsua_ecoli |
| P0AA43 | RSUA_ECOLI | * P0AGE9 | P0AA43 | sucd_ecoli | rsua_ecoli |
| P0AA43 | RSUA_ECOLI | * P0A8E5 | P0AA43 | yacl_ecoli | rsua_ecoli |



|        |            |          |        |             |            |
|--------|------------|----------|--------|-------------|------------|
| P0AA43 | RSUA_ECOLI | * P75990 | P0AA43 | ycgf_ecoli  | rsua_ecoli |
| P0AA43 | RSUA_ECOLI | * P39165 | P0AA43 | ycho_ecoli  | rsua_ecoli |
| P0AA43 | RSUA_ECOLI | * P38394 | P0AA43 | ydae_ecoli  | rsua_ecoli |
| P0AA43 | RSUA_ECOLI | * P0ACY1 | P0AA43 | ydja_ecoli  | rsua_ecoli |
| P0AA43 | RSUA_ECOLI | * P64483 | P0AA43 | yeak_ecoli  | rsua_ecoli |
| P0AA43 | RSUA_ECOLI | * P76318 | P0AA43 | yedk_ecoli  | rsua_ecoli |
| P0AA43 | RSUA_ECOLI | * P78271 | P0AA43 | yfes_ecoli  | rsua_ecoli |
| P0AA43 | RSUA_ECOLI | * P75713 | P0AA43 | ylba_ecoli  | rsua_ecoli |
| P55135 | RUMA_ECOLI | * P75992 | P55135 | ymga_ecoli  | ruma_ecoli |
| P75817 | RUMB_ECOLI | * P23869 | P75817 | ppib_ecoli  | rumb_ecoli |
| P0A809 | RUVA_ECOLI | * P68739 | P0A809 | nfi_ecoli   | ruva_ecoli |
| P0A809 | RUVA_ECOLI | * P21893 | P0A809 | recj_ecoli  | ruva_ecoli |
| P0AAH4 | SAPD_ECOLI | * P31062 | P0AAH4 | nohb_ecoli  | sapd_ecoli |
| P0AAH4 | SAPD_ECOLI | * P0A9K9 | P0AAH4 | slyd_ecoli  | sapd_ecoli |
| P0AAH4 | SAPD_ECOLI | * P75843 | P0AAH4 | ycaq_ecoli  | sapd_ecoli |
| P16095 | SDHL_ECOLI | none     |        |             |            |
| P30744 | SDHM_ECOLI | * P0AA25 | P30744 | thio_ecoli  | sdhm_ecoli |
| P10408 | SECA_ECOLI | * P0A6A8 | P10408 | acp_ecoli   | seca_ecoli |
| P10408 | SECA_ECOLI | * P0A6A8 | P10408 | acp_ecoli   | seca_ecoli |
| P10408 | SECA_ECOLI | * P0A6A8 | P10408 | acp_ecoli   | seca_ecoli |
| P10408 | SECA_ECOLI | * P0AE12 | P10408 | amn_ecoli   | seca_ecoli |
| P10408 | SECA_ECOLI | * P0AC38 | P10408 | aspa_ecoli  | seca_ecoli |
| P10408 | SECA_ECOLI | * P0A962 | P10408 | aspg1_ecoli | seca_ecoli |
| P10408 | SECA_ECOLI | * P00722 | P10408 | bgal_ecoli  | seca_ecoli |
| P10408 | SECA_ECOLI | * P0ABH9 | P10408 | clpa_ecoli  | seca_ecoli |
| P10408 | SECA_ECOLI | * P0A6G7 | P10408 | clpp_ecoli  | seca_ecoli |
| P10408 | SECA_ECOLI | * P0A972 | P10408 | cspe_ecoli  | seca_ecoli |
| P10408 | SECA_ECOLI | * P33371 | P10408 | dusc_ecoli  | seca_ecoli |
| P10408 | SECA_ECOLI | * P0CE47 | P10408 | eftu1_ecoli | seca_ecoli |
| P10408 | SECA_ECOLI | * P0CE47 | P10408 | eftu1_ecoli | seca_ecoli |
| P10408 | SECA_ECOLI | * P0A6C1 | P10408 | end4_ecoli  | seca_ecoli |
| P10408 | SECA_ECOLI | * P52613 | P10408 | flij_ecoli  | seca_ecoli |
| P10408 | SECA_ECOLI | * P0A9A6 | P10408 | ftsz_ecoli  | seca_ecoli |
| P10408 | SECA_ECOLI | * P33195 | P10408 | gcsp_ecoli  | seca_ecoli |
| P10408 | SECA_ECOLI | * P0A6W5 | P10408 | grea_ecoli  | seca_ecoli |
| P10408 | SECA_ECOLI | * P0A6X3 | P10408 | hfq_ecoli   | seca_ecoli |
| P10408 | SECA_ECOLI | * P67910 | P10408 | hldd_ecoli  | seca_ecoli |
| P10408 | SECA_ECOLI | * P0ACF8 | P10408 | hns_ecoli   | seca_ecoli |

|        |            |   |        |        |            |            |
|--------|------------|---|--------|--------|------------|------------|
| P10408 | SECA_ECOLI | * | P28631 | P10408 | holb_ecoli | seca_ecoli |
| P10408 | SECA_ECOLI | * | P28905 | P10408 | holc_ecoli | seca_ecoli |
| P10408 | SECA_ECOLI | * | P28632 | P10408 | hold_ecoli | seca_ecoli |
| P10408 | SECA_ECOLI | * | P0A6Z1 | P10408 | hsca_ecoli | seca_ecoli |
| P10408 | SECA_ECOLI | * | P0A6H5 | P10408 | hslu_ecoli | seca_ecoli |
| P10408 | SECA_ECOLI | * | P02943 | P10408 | lamb_ecoli | seca_ecoli |
| P10408 | SECA_ECOLI | * | P02943 | P10408 | lamb_ecoli | seca_ecoli |
| P10408 | SECA_ECOLI | * | P02943 | P10408 | lamb_ecoli | seca_ecoli |
| P10408 | SECA_ECOLI | * | P0A9H3 | P10408 | ldci_ecoli | seca_ecoli |
| P10408 | SECA_ECOLI | * | P0A817 | P10408 | metk_ecoli | seca_ecoli |
| P10408 | SECA_ECOLI | * | P25522 | P10408 | mnme_ecoli | seca_ecoli |
| P10408 | SECA_ECOLI | * | P0A9X4 | P10408 | mreb_ecoli | seca_ecoli |
| P10408 | SECA_ECOLI | * | P0A9X4 | P10408 | mreb_ecoli | seca_ecoli |
| P10408 | SECA_ECOLI | * | P19319 | P10408 | narz_ecoli | seca_ecoli |
| P10408 | SECA_ECOLI | * | P33594 | P10408 | nike_ecoli | seca_ecoli |
| P10408 | SECA_ECOLI | * | P0AFG0 | P10408 | nusg_ecoli | seca_ecoli |
| P10408 | SECA_ECOLI | * | P0AFI2 | P10408 | parc_ecoli | seca_ecoli |
| P10408 | SECA_ECOLI | * | P20083 | P10408 | pare_ecoli | seca_ecoli |
| P10408 | SECA_ECOLI | * | P0A9K3 | P10408 | phol_ecoli | seca_ecoli |
| P10408 | SECA_ECOLI | * | P00634 | P10408 | ppb_ecoli  | seca_ecoli |
| P10408 | SECA_ECOLI | * | P0A7E9 | P10408 | pyrh_ecoli | seca_ecoli |
| P10408 | SECA_ECOLI | * | P0ADZ0 | P10408 | rl23_ecoli | seca_ecoli |
| P10408 | SECA_ECOLI | * | P60723 | P10408 | rl4_ecoli  | seca_ecoli |
| P10408 | SECA_ECOLI | * | P36979 | P10408 | rlmn_ecoli | seca_ecoli |
| P10408 | SECA_ECOLI | * | P36979 | P10408 | rlmn_ecoli | seca_ecoli |
| P10408 | SECA_ECOLI | * | P0AA39 | P10408 | rluc_ecoli | seca_ecoli |
| P10408 | SECA_ECOLI | * | P27434 | P10408 | rodz_ecoli | seca_ecoli |
| P10408 | SECA_ECOLI | * | P0A8V2 | P10408 | rpob_ecoli | seca_ecoli |
| P10408 | SECA_ECOLI | * | P10408 | P10408 | seca_ecoli | seca_ecoli |
| P10408 | SECA_ECOLI | * | P0AG86 | P10408 | secb_ecoli | seca_ecoli |
| P10408 | SECA_ECOLI | * | P0AGA2 | P10408 | secy_ecoli | seca_ecoli |
| P10408 | SECA_ECOLI | * | P0A828 | P10408 | smg_ecoli  | seca_ecoli |
| P10408 | SECA_ECOLI | * | P28043 | P10408 | ssb2_ecolx | seca_ecoli |
| P10408 | SECA_ECOLI | * | P0A832 | P10408 | ssrp_ecoli | seca_ecoli |
| P10408 | SECA_ECOLI | * | P0AG78 | P10408 | subi_ecoli | seca_ecoli |
| P10408 | SECA_ECOLI | * | P0AGJ9 | P10408 | syy_ecoli  | seca_ecoli |
| P10408 | SECA_ECOLI | * | P39177 | P10408 | uspg_ecoli | seca_ecoli |
| P10408 | SECA_ECOLI | * | P03018 | P10408 | uvrd_ecoli | seca_ecoli |
| P10408 | SECA_ECOLI | * | P0A8Z3 | P10408 | ybgc_ecoli | seca_ecoli |
| P10408 | SECA_ECOLI | * | P0A8Z3 | P10408 | ybgc_ecoli | seca_ecoli |
| P10408 | SECA_ECOLI | * | P75767 | P10408 | ybhk_ecoli | seca_ecoli |
| P10408 | SECA_ECOLI | * | P0AD05 | P10408 | yeca_ecoli | seca_ecoli |
| P10408 | SECA_ECOLI | * | P33913 | P10408 | yeja_ecoli | seca_ecoli |
| P10408 | SECA_ECOLI | * | P0A8H6 | P10408 | yihi_ecoli | seca_ecoli |

|        |            |          |        |             |            |
|--------|------------|----------|--------|-------------|------------|
| P0AG86 | SECB_ECOLI | * P0A7A9 | P0AG86 | ipyr_ecoli  | secb_ecoli |
| P0AG86 | SECB_ECOLI | * P0A9M0 | P0AG86 | lon_ecoli   | secb_ecoli |
| P0AG86 | SECB_ECOLI | * P10408 | P0AG86 | seca_ecoli  | secb_ecoli |
| P0AG86 | SECB_ECOLI | * P10408 | P0AG86 | seca_ecoli  | secb_ecoli |
| P0AG86 | SECB_ECOLI | * P77515 | P0AG86 | stfq_ecoli  | secb_ecoli |
| P0AG86 | SECB_ECOLI | * P37903 | P0AG86 | uspf_ecoli  | secb_ecoli |
| P0AG86 | SECB_ECOLI | * P39177 | P0AG86 | uspg_ecoli  | secb_ecoli |
| P0AG86 | SECB_ECOLI | * P33666 | P0AG86 | ydba_ecoli  | secb_ecoli |
| P0AG86 | SECB_ECOLI | * P77286 | P0AG86 | ydeu_ecoli  | secb_ecoli |
|        |            |          |        |             |            |
| P14081 | SELB_ECOLI | * P24169 | P14081 | dcos_ecoli  | selb_ecoli |
| P14081 | SELB_ECOLI | * P0A6X3 | P14081 | hfg_ecoli   | selb_ecoli |
| P14081 | SELB_ECOLI | * P36979 | P14081 | rlmn_ecoli  | selb_ecoli |
| P14081 | SELB_ECOLI | * P36979 | P14081 | rlmn_ecoli  | selb_ecoli |
| P14081 | SELB_ECOLI | * P23721 | P14081 | serc_ecoli  | selb_ecoli |
| P14081 | SELB_ECOLI | * P0A832 | P14081 | ssrp_ecoli  | selb_ecoli |
| P14081 | SELB_ECOLI | * P76100 | P14081 | ydck_ecoli  | selb_ecoli |
| P14081 | SELB_ECOLI | * P76104 | P14081 | ydcp_ecoli  | selb_ecoli |
| P14081 | SELB_ECOLI | * P64479 | P14081 | ydiz_ecoli  | selb_ecoli |
|        |            |          |        |             |            |
| P16456 | SELD_ECOLI | * P0AC69 | P16456 | glrx4_ecoli | seld_ecoli |
| P16456 | SELD_ECOLI | * P0AG07 | P16456 | rpe_ecoli   | seld_ecoli |
| P16456 | SELD_ECOLI | * P00954 | P16456 | syw_ecoli   | seld_ecoli |
|        |            |          |        |             |            |
| P0AFY8 | SEQA_ECOLI | * P0ACF4 | P0AFY8 | dbhb_ecoli  | seqa_ecoli |
|        |            |          |        |             |            |
| P0AGB0 | SERB_ECOLI | * P0AAF3 | P0AGB0 | arag_ecoli  | serb_ecoli |
| P0AGB0 | SERB_ECOLI | * P0A903 | P0AGB0 | nlpb_ecoli  | serb_ecoli |
|        |            |          |        |             |            |
| P23721 | SERC_ECOLI | * P77671 | P23721 | allb_ecoli  | serc_ecoli |
| P23721 | SERC_ECOLI | * P00963 | P23721 | asna_ecoli  | serc_ecoli |
| P23721 | SERC_ECOLI | * P0AEF4 | P23721 | dpia_ecoli  | serc_ecoli |
| P23721 | SERC_ECOLI | * P75914 | P23721 | ycdx_ecoli  | serc_ecoli |
|        |            |          |        |             |            |
| P77468 | SFMD_ECOLI | * P21513 | P77468 | rne_ecoli   | sfmd_ecoli |
| P77468 | SFMD_ECOLI | * P21513 | P77468 | rne_ecoli   | sfmd_ecoli |
| P77468 | SFMD_ECOLI | * P21513 | P77468 | rne_ecoli   | sfmd_ecoli |
| P77468 | SFMD_ECOLI | * P21513 | P77468 | rne_ecoli   | sfmd_ecoli |
| P77468 | SFMD_ECOLI | * P21513 | P77468 | rne_ecoli   | sfmd_ecoli |
| P77468 | SFMD_ECOLI | * P0AAQ2 | P77468 | yajd_ecoli  | sfmd_ecoli |
|        |            |          |        |             |            |
| P33595 | SGRR_ECOLI | none     |        |             |            |
|        |            |          |        |             |            |
| P0AEU7 | SKP_ECOLI  | * P0A968 | P0AEU7 | cspd_ecoli  | skp_ecoli  |
| P0AEU7 | SKP_ECOLI  | * P0ACF4 | P0AEU7 | dbhb_ecoli  | skp_ecoli  |

|        |            |   |        |        |             |            |
|--------|------------|---|--------|--------|-------------|------------|
| P0AEU7 | SKP_ECOLI  | * | P0ABT2 | P0AEU7 | dps_ecoli   | skp_ecoli  |
| P0AEU7 | SKP_ECOLI  | * | P0AC92 | P0AEU7 | gnsa_ecoli  | skp_ecoli  |
| P0AEU7 | SKP_ECOLI  | * | P0A6X3 | P0AEU7 | hfq_ecoli   | skp_ecoli  |
| P0AEU7 | SKP_ECOLI  | * | P0A6X3 | P0AEU7 | hfq_ecoli   | skp_ecoli  |
| P0AEU7 | SKP_ECOLI  | * | P0A7C2 | P0AEU7 | lexa_ecoli  | skp_ecoli  |
| P0AEU7 | SKP_ECOLI  | * | P0AF10 | P0AEU7 | mtlr_ecoli  | skp_ecoli  |
| P0AEU7 | SKP_ECOLI  | * | P76535 | P0AEU7 | murq_ecoli  | skp_ecoli  |
| P0AEU7 | SKP_ECOLI  | * | P36979 | P0AEU7 | rlmn_ecoli  | skp_ecoli  |
| P0AEU7 | SKP_ECOLI  | * | P0A832 | P0AEU7 | ssrp_ecoli  | skp_ecoli  |
| P0AEU7 | SKP_ECOLI  | * | P0A890 | P0AEU7 | tusa_ecoli  | skp_ecoli  |
| P0AEU7 | SKP_ECOLI  | * | P11291 | P0AEU7 | y3808_ecoli | skp_ecoli  |
| P0AEU7 | SKP_ECOLI  | * | P76270 | P0AEU7 | yebr_ecoli  | skp_ecoli  |
| P0AEU7 | SKP_ECOLI  | * | P76419 | P0AEU7 | yegv_ecoli  | skp_ecoli  |
| P0AEU7 | SKP_ECOLI  | * | P0A8H6 | P0AEU7 | yihi_ecoli  | skp_ecoli  |
| P0C093 | SLMA_ECOLI |   | none   |        |             |            |
| P37194 | SLP_ECOLI  | * | P69908 | P37194 | dcea_ecoli  | slp_ecoli  |
| P37194 | SLP_ECOLI  | * | P0AEE1 | P37194 | dcrb_ecoli  | slp_ecoli  |
| P37194 | SLP_ECOLI  | * | P00363 | P37194 | frda_ecoli  | slp_ecoli  |
| P37194 | SLP_ECOLI  | * | P37194 | P37194 | slp_ecoli   | slp_ecoli  |
| P0A8W2 | SLYA_ECOLI |   | none   |        |             |            |
| P0A905 | SLYB_ECOLI | * | P0A6H1 | P0A905 | clpx_ecoli  | slyb_ecoli |
| P0A905 | SLYB_ECOLI | * | P0AEI4 | P0A905 | rimo_ecoli  | slyb_ecoli |
| P0A905 | SLYB_ECOLI | * | P0A8A0 | P0A905 | yebc_ecoli  | slyb_ecoli |
| P0A9K9 | SLYD_ECOLI | * | P04395 | P0A9K9 | 3mg2_ecoli  | slyd_ecoli |
| P0A9K9 | SLYD_ECOLI | * | P39265 | P0A9K9 | alsb_ecoli  | slyd_ecoli |
| P0A9K9 | SLYD_ECOLI | * | P60584 | P0A9K9 | caia_ecoli  | slyd_ecoli |
| P0A9K9 | SLYD_ECOLI | * | P0A6F9 | P0A9K9 | ch10_ecoli  | slyd_ecoli |
| P0A9K9 | SLYD_ECOLI | * | P0A6G7 | P0A9K9 | clpp_ecoli  | slyd_ecoli |
| P0A9K9 | SLYD_ECOLI | * | P0AE78 | P0A9K9 | corc_ecoli  | slyd_ecoli |
| P0A9K9 | SLYD_ECOLI | * | P0A6J1 | P0A9K9 | cysc_ecoli  | slyd_ecoli |
| P0A9K9 | SLYD_ECOLI | * | P0ACF4 | P0A9K9 | dbhb_ecoli  | slyd_ecoli |
| P0A9K9 | SLYD_ECOLI | * | P00582 | P0A9K9 | dpo1_ecoli  | slyd_ecoli |
| P0A9K9 | SLYD_ECOLI | * | P03007 | P0A9K9 | dpo3e_ecoli | slyd_ecoli |
| P0A9K9 | SLYD_ECOLI | * | P03007 | P0A9K9 | dpo3e_ecoli | slyd_ecoli |
| P0A9K9 | SLYD_ECOLI | * | P0ABT2 | P0A9K9 | dps_ecoli   | slyd_ecoli |
| P0A9K9 | SLYD_ECOLI | * | P0AEG6 | P0A9K9 | dsbc_ecoli  | slyd_ecoli |
| P0A9K9 | SLYD_ECOLI | * | P0ADF6 | P0A9K9 | edd_ecoli   | slyd_ecoli |
| P0A9K9 | SLYD_ECOLI | * | P0AB83 | P0A9K9 | end3_ecoli  | slyd_ecoli |
| P0A9K9 | SLYD_ECOLI | * | P50465 | P0A9K9 | end8_ecoli  | slyd_ecoli |
| P0A9K9 | SLYD_ECOLI | * | P06616 | P0A9K9 | era_ecoli   | slyd_ecoli |

|        |            |          |        |                             |                            |
|--------|------------|----------|--------|-----------------------------|----------------------------|
| P0A9K9 | SLYD_ECOLI | * P76555 | P0A9K9 | <a href="#">eutq_ecoli</a>  | <a href="#">slyd_ecoli</a> |
| P0A9K9 | SLYD_ECOLI | * P13024 | P0A9K9 | <a href="#">fdhe_ecoli</a>  | <a href="#">slyd_ecoli</a> |
| P0A9K9 | SLYD_ECOLI | * P0AEM0 | P0A9K9 | <a href="#">fkbx_ecoli</a>  | <a href="#">slyd_ecoli</a> |
| P0A9K9 | SLYD_ECOLI | * P31068 | P0A9K9 | <a href="#">flih_ecoli</a>  | <a href="#">slyd_ecoli</a> |
| P0A9K9 | SLYD_ECOLI | * P0ABH0 | P0A9K9 | <a href="#">ftsa_ecoli</a>  | <a href="#">slyd_ecoli</a> |
| P0A9K9 | SLYD_ECOLI | * P0A9R7 | P0A9K9 | <a href="#">ftse_ecoli</a>  | <a href="#">slyd_ecoli</a> |
| P0A9K9 | SLYD_ECOLI | * P0ACK8 | P0A9K9 | <a href="#">fucr_ecoli</a>  | <a href="#">slyd_ecoli</a> |
| P0A9K9 | SLYD_ECOLI | * P13035 | P0A9K9 | <a href="#">glpd_ecoli</a>  | <a href="#">slyd_ecoli</a> |
| P0A9K9 | SLYD_ECOLI | * P0AC69 | P0A9K9 | <a href="#">glrx4_ecoli</a> | <a href="#">slyd_ecoli</a> |
| P0A9K9 | SLYD_ECOLI | * P0CI31 | P0A9K9 | <a href="#">hcab_ecoli</a>  | <a href="#">slyd_ecoli</a> |
| P0A9K9 | SLYD_ECOLI | * P0AAN3 | P0A9K9 | <a href="#">hypb_ecoli</a>  | <a href="#">slyd_ecoli</a> |
| P0A9K9 | SLYD_ECOLI | * P0ADF8 | P0A9K9 | <a href="#">ilvn_ecoli</a>  | <a href="#">slyd_ecoli</a> |
| P0A9K9 | SLYD_ECOLI | * P0A7A9 | P0A9K9 | <a href="#">ipyr_ecoli</a>  | <a href="#">slyd_ecoli</a> |
| P0A9K9 | SLYD_ECOLI | * P0AGK8 | P0A9K9 | <a href="#">iscr_ecoli</a>  | <a href="#">slyd_ecoli</a> |
| P0A9K9 | SLYD_ECOLI | * P18196 | P0A9K9 | <a href="#">minc_ecoli</a>  | <a href="#">slyd_ecoli</a> |
| P0A9K9 | SLYD_ECOLI | * P0A908 | P0A9K9 | <a href="#">mipa_ecoli</a>  | <a href="#">slyd_ecoli</a> |
| P0A9K9 | SLYD_ECOLI | * P0A9H1 | P0A9K9 | <a href="#">mug_ecoli</a>   | <a href="#">slyd_ecoli</a> |
| P0A9K9 | SLYD_ECOLI | * P14900 | P0A9K9 | <a href="#">murd_ecoli</a>  | <a href="#">slyd_ecoli</a> |
| P0A9K9 | SLYD_ECOLI | * P76535 | P0A9K9 | <a href="#">murq_ecoli</a>  | <a href="#">slyd_ecoli</a> |
| P0A9K9 | SLYD_ECOLI | * P06722 | P0A9K9 | <a href="#">muth_ecoli</a>  | <a href="#">slyd_ecoli</a> |
| P0A9K9 | SLYD_ECOLI | * P77258 | P0A9K9 | <a href="#">nema_ecoli</a>  | <a href="#">slyd_ecoli</a> |
| P0A9K9 | SLYD_ECOLI | * P32712 | P0A9K9 | <a href="#">nrfg_ecoli</a>  | <a href="#">slyd_ecoli</a> |
| P0A9K9 | SLYD_ECOLI | * P42641 | P0A9K9 | <a href="#">obg_ecoli</a>   | <a href="#">slyd_ecoli</a> |
| P0A9K9 | SLYD_ECOLI | * A8A6G7 | P0A9K9 | <a href="#">oxaa_ecohs</a>  | <a href="#">slyd_ecoli</a> |
| P0A9K9 | SLYD_ECOLI | * P31057 | P0A9K9 | <a href="#">panb_ecoli</a>  | <a href="#">slyd_ecoli</a> |
| P0A9K9 | SLYD_ECOLI | * P31663 | P0A9K9 | <a href="#">panc_ecoli</a>  | <a href="#">slyd_ecoli</a> |
| P0A9K9 | SLYD_ECOLI | * P0AFI2 | P0A9K9 | <a href="#">parc_ecoli</a>  | <a href="#">slyd_ecoli</a> |
| P0A9K9 | SLYD_ECOLI | * P16692 | P0A9K9 | <a href="#">phpn_ecoli</a>  | <a href="#">slyd_ecoli</a> |
| P0A9K9 | SLYD_ECOLI | * P0A7E9 | P0A9K9 | <a href="#">pyrh_ecoli</a>  | <a href="#">slyd_ecoli</a> |
| P0A9K9 | SLYD_ECOLI | * P15033 | P0A9K9 | <a href="#">racc_ecoli</a>  | <a href="#">slyd_ecoli</a> |
| P0A9K9 | SLYD_ECOLI | * P0AG20 | P0A9K9 | <a href="#">rela_ecoli</a>  | <a href="#">slyd_ecoli</a> |
| P0A9K9 | SLYD_ECOLI | * P0AFW0 | P0A9K9 | <a href="#">rfah_ecoli</a>  | <a href="#">slyd_ecoli</a> |
| P0A9K9 | SLYD_ECOLI | * P0AG44 | P0A9K9 | <a href="#">rl17_ecoli</a>  | <a href="#">slyd_ecoli</a> |
| P0A9K9 | SLYD_ECOLI | * P60723 | P0A9K9 | <a href="#">rl4_ecoli</a>   | <a href="#">slyd_ecoli</a> |
| P0A9K9 | SLYD_ECOLI | * P0ACS7 | P0A9K9 | <a href="#">rpir_ecoli</a>  | <a href="#">slyd_ecoli</a> |
| P0A9K9 | SLYD_ECOLI | * P0A776 | P0A9K9 | <a href="#">rpph_ecoli</a>  | <a href="#">slyd_ecoli</a> |
| P0A9K9 | SLYD_ECOLI | * P0AG67 | P0A9K9 | <a href="#">rs1_ecoli</a>   | <a href="#">slyd_ecoli</a> |
| P0A9K9 | SLYD_ECOLI | * P0AGL7 | P0A9K9 | <a href="#">rsme_ecoli</a>  | <a href="#">slyd_ecoli</a> |
| P0A9K9 | SLYD_ECOLI | * P0ACU2 | P0A9K9 | <a href="#">rutr_ecoli</a>  | <a href="#">slyd_ecoli</a> |
| P0A9K9 | SLYD_ECOLI | * P0A823 | P0A9K9 | <a href="#">sfsa_ecoli</a>  | <a href="#">slyd_ecoli</a> |
| P0A9K9 | SLYD_ECOLI | * P0AGD3 | P0A9K9 | <a href="#">sodf_ecoli</a>  | <a href="#">slyd_ecoli</a> |
| P0A9K9 | SLYD_ECOLI | * P28043 | P0A9K9 | <a href="#">ssb2_ecolx</a>  | <a href="#">slyd_ecoli</a> |
| P0A9K9 | SLYD_ECOLI | * P0AFZ3 | P0A9K9 | <a href="#">sspb_ecoli</a>  | <a href="#">slyd_ecoli</a> |
| P0A9K9 | SLYD_ECOLI | * P0AFZ3 | P0A9K9 | <a href="#">sspb_ecoli</a>  | <a href="#">slyd_ecoli</a> |
| P0A9K9 | SLYD_ECOLI | * P0ACG1 | P0A9K9 | <a href="#">stpa_ecoli</a>  | <a href="#">slyd_ecoli</a> |

|        |            |          |        |             |            |
|--------|------------|----------|--------|-------------|------------|
| P0A9K9 | SLYD_ECOLI | * P0ADG4 | P0A9K9 | suhb_ecoli  | slyd_ecoli |
| P0A9K9 | SLYD_ECOLI | * P21889 | P0A9K9 | syd_ecoli   | slyd_ecoli |
| P0A9K9 | SLYD_ECOLI | * P04805 | P0A9K9 | sy_e_coli   | slyd_ecoli |
| P0A9K9 | SLYD_ECOLI | * P75948 | P0A9K9 | thik_ecoli  | slyd_ecoli |
| P0A9K9 | SLYD_ECOLI | * P0AGG0 | P0A9K9 | thil_ecoli  | slyd_ecoli |
| P0A9K9 | SLYD_ECOLI | * P0AA25 | P0A9K9 | thio_ecoli  | slyd_ecoli |
| P0A9K9 | SLYD_ECOLI | * P0AA25 | P0A9K9 | thio_ecoli  | slyd_ecoli |
| P0A9K9 | SLYD_ECOLI | * P0AGG4 | P0A9K9 | thio2_ecoli | slyd_ecoli |
| P0A9K9 | SLYD_ECOLI | * P0A850 | P0A9K9 | tig_ecoli   | slyd_ecoli |
| P0A9K9 | SLYD_ECOLI | * P71242 | P0A9K9 | wcak_ecoli  | slyd_ecoli |
| P0A9K9 | SLYD_ECOLI | * Q46800 | P0A9K9 | xdhb_ecoli  | slyd_ecoli |
| P0A9K9 | SLYD_ECOLI | * P0A8E5 | P0A9K9 | yacl_ecoli  | slyd_ecoli |
| P0A9K9 | SLYD_ECOLI | * P77607 | P0A9K9 | yagl_ecoli  | slyd_ecoli |
| P0A9K9 | SLYD_ECOLI | * P75684 | P0A9K9 | yagp_ecoli  | slyd_ecoli |
| P0A9K9 | SLYD_ECOLI | * P77735 | P0A9K9 | yajo_ecoli  | slyd_ecoli |
| P0A9K9 | SLYD_ECOLI | * P0A8X2 | P0A9K9 | ycei_ecoli  | slyd_ecoli |
| P0A9K9 | SLYD_ECOLI | * P75989 | P0A9K9 | ycge_ecoli  | slyd_ecoli |
| P0A9K9 | SLYD_ECOLI | * P0AB43 | P0A9K9 | ycgl_ecoli  | slyd_ecoli |
| P0A9K9 | SLYD_ECOLI | * P76004 | P0A9K9 | ycgm_ecoli  | slyd_ecoli |
| P0A9K9 | SLYD_ECOLI | * P30192 | P0A9K9 | ychg_ecoli  | slyd_ecoli |
| P0A9K9 | SLYD_ECOLI | * P37052 | P0A9K9 | ychj_ecoli  | slyd_ecoli |
| P0A9K9 | SLYD_ECOLI | * P08245 | P0A9K9 | ycih_ecoli  | slyd_ecoli |
| P0A9K9 | SLYD_ECOLI | * P0A8A0 | P0A9K9 | yebc_ecoli  | slyd_ecoli |
| P0A9K9 | SLYD_ECOLI | * P76318 | P0A9K9 | yedk_ecoli  | slyd_ecoli |
| P0A9K9 | SLYD_ECOLI | * P76419 | P0A9K9 | yegv_ecoli  | slyd_ecoli |
| P0A9K9 | SLYD_ECOLI | * P52119 | P0A9K9 | yfjf_ecoli  | slyd_ecoli |
| P0A9K9 | SLYD_ECOLI | * Q46888 | P0A9K9 | ygbj_ecoli  | slyd_ecoli |
| P0A9K9 | SLYD_ECOLI | * P67660 | P0A9K9 | yhaj_ecoli  | slyd_ecoli |
| P0A9K9 | SLYD_ECOLI | * P42624 | P0A9K9 | yhak_ecoli  | slyd_ecoli |
| P0A9K9 | SLYD_ECOLI | * P45472 | P0A9K9 | yhbq_ecoli  | slyd_ecoli |
| P0A9K9 | SLYD_ECOLI | * P0ACV8 | P0A9K9 | ymja_ecoli  | slyd_ecoli |
| P0A9K9 | SLYD_ECOLI | * P76117 | P0A9K9 | yncg_ecoli  | slyd_ecoli |
| P0A9K9 | SLYD_ECOLI | * Q46856 | P0A9K9 | yqhd_ecoli  | slyd_ecoli |
| P0AGD3 | SODF_ECOLI | * P0ABK5 | P0AGD3 | cysk_ecoli  | sodf_ecoli |
| P00448 | SODM_ECOLI | * P0AA25 | P00448 | thio_ecoli  | sodm_ecoli |
| P0AG14 | SOHB_ECOLI | * P0ABU2 | P0AG14 | engd_ecoli  | sohb_ecoli |
| P0AG14 | SOHB_ECOLI | * P64483 | P0AG14 | yeak_ecoli  | sohb_ecoli |
| P0AG14 | SOHB_ECOLI | * P77658 | P0AG14 | ynaa_ecoli  | sohb_ecoli |
| P21170 | SPEA_ECOLI | * P0A8P1 | P21170 | lftr_ecoli  | spea_ecoli |
| P0A7F6 | SPED_ECOLI | * P36683 | P0A7F6 | acon2_ecoli | sped_ecoli |



|        |            |          |        |            |            |
|--------|------------|----------|--------|------------|------------|
| P0A7F6 | SPED_ECOLI | * P0C0R7 | P0A7F6 | rlme_ecoli | sped_ecoli |
| P0AG24 | SPOT_ECOLI | * P0A6A8 | P0AG24 | acp_ecoli  | spot_ecoli |
| P0AG24 | SPOT_ECOLI | * P0A6A8 | P0AG24 | acp_ecoli  | spot_ecoli |
| P0AG24 | SPOT_ECOLI | * P0ABH9 | P0AG24 | clpa_ecoli | spot_ecoli |
| P0AG24 | SPOT_ECOLI | * P61949 | P0AG24 | flav_ecoli | spot_ecoli |
| P0AG24 | SPOT_ECOLI | * P0A6X3 | P0AG24 | hfq_ecoli  | spot_ecoli |
| P0AG24 | SPOT_ECOLI | * P77756 | P0AG24 | quec_ecoli | spot_ecoli |
| P0AG24 | SPOT_ECOLI | * P0A7H0 | P0AG24 | recf_ecoli | spot_ecoli |
| P0AG24 | SPOT_ECOLI | * P36979 | P0AG24 | rlmn_ecoli | spot_ecoli |
| P0AG24 | SPOT_ECOLI | * P0AA39 | P0AG24 | rluc_ecoli | spot_ecoli |
| P0AG24 | SPOT_ECOLI | * P0AFW4 | P0AG24 | rnk_ecoli  | spot_ecoli |
| P0AG24 | SPOT_ECOLI | * P0A7Y8 | P0AG24 | rnpa_ecoli | spot_ecoli |
| P0AG24 | SPOT_ECOLI | * P0A800 | P0AG24 | rpoz_ecoli | spot_ecoli |
| P0AG24 | SPOT_ECOLI | * P0A776 | P0AG24 | rpph_ecoli | spot_ecoli |
| P0AG24 | SPOT_ECOLI | * P0AEU7 | P0AG24 | skp_ecoli  | spot_ecoli |
| P0AG24 | SPOT_ECOLI | * P0A8Z3 | P0AG24 | ybgc_ecoli | spot_ecoli |
| P0AG24 | SPOT_ECOLI | * P64476 | P0AG24 | ydiH_ecoli | spot_ecoli |
| P0AG24 | SPOT_ECOLI | * P0A8H6 | P0AG24 | yihI_ecoli | spot_ecoli |
| P68191 | SRA_ECOLI  | * P09372 | P68191 | grpe_ecoli | sra_ecoli  |
| P21507 | SRMB_ECOLI | * P36659 | P21507 | cbpa_ecoli | srmb_ecoli |
| P21507 | SRMB_ECOLI | * P0A9P6 | P21507 | dead_ecoli | srmb_ecoli |
| P21507 | SRMB_ECOLI | * P08622 | P21507 | dnaj_ecoli | srmb_ecoli |
| P21507 | SRMB_ECOLI | * P33594 | P21507 | nike_ecoli | srmb_ecoli |
| P21507 | SRMB_ECOLI | * P0A7A7 | P21507 | plsb_ecoli | srmb_ecoli |
| P21507 | SRMB_ECOLI | * P05055 | P21507 | pnP_ecoli  | srmb_ecoli |
| P21507 | SRMB_ECOLI | * P60723 | P21507 | rl4_ecoli  | srmb_ecoli |
| P21507 | SRMB_ECOLI | * P36979 | P21507 | rlmn_ecoli | srmb_ecoli |
| P21507 | SRMB_ECOLI | * P36979 | P21507 | rlmn_ecoli | srmb_ecoli |
| P21507 | SRMB_ECOLI | * P37765 | P21507 | rlub_ecoli | srmb_ecoli |
| P21507 | SRMB_ECOLI | * P37765 | P21507 | rlub_ecoli | srmb_ecoli |
| P21507 | SRMB_ECOLI | * P0AA39 | P21507 | rluc_ecoli | srmb_ecoli |
| P21507 | SRMB_ECOLI | * P21513 | P21507 | rne_ecoli  | srmb_ecoli |
| P21507 | SRMB_ECOLI | * P0A776 | P21507 | rpph_ecoli | srmb_ecoli |
| P21507 | SRMB_ECOLI | * P14081 | P21507 | selb_ecoli | srmb_ecoli |
| P21507 | SRMB_ECOLI | * P14081 | P21507 | selb_ecoli | srmb_ecoli |
| P21507 | SRMB_ECOLI | * P0AG24 | P21507 | spot_ecoli | srmb_ecoli |
| P21507 | SRMB_ECOLI | * P26648 | P21507 | sufi_ecoli | srmb_ecoli |
| P21507 | SRMB_ECOLI | * P06612 | P21507 | top1_ecoli | srmb_ecoli |
| P21507 | SRMB_ECOLI | * P0A8I5 | P21507 | trmb_ecoli | srmb_ecoli |
| P21507 | SRMB_ECOLI | * P0AAS7 | P21507 | ybcj_ecoli | srmb_ecoli |
| P21507 | SRMB_ECOLI | * P75829 | P21507 | ybjx_ecoli | srmb_ecoli |
| P21507 | SRMB_ECOLI | * P64517 | P21507 | yodc_ecoli | srmb_ecoli |

|        |             |          |        |                              |                             |
|--------|-------------|----------|--------|------------------------------|-----------------------------|
| P0AGD7 | SRP54_ECOLI | * P0A6Q3 | P0AGD7 | <a href="#">faba_ecoli</a>   | <a href="#">srp54_ecoli</a> |
| P0AGD7 | SRP54_ECOLI | * P0A6Q6 | P0AGD7 | <a href="#">fabz_ecoli</a>   | <a href="#">srp54_ecoli</a> |
| P0AGD7 | SRP54_ECOLI | * P0AES4 | P0AGD7 | <a href="#">gyra_ecoli</a>   | <a href="#">srp54_ecoli</a> |
| P0AGD7 | SRP54_ECOLI | * P0C0R7 | P0AGD7 | <a href="#">rlme_ecoli</a>   | <a href="#">srp54_ecoli</a> |
| P0AGD7 | SRP54_ECOLI | * P0AA25 | P0AGD7 | <a href="#">thio_ecoli</a>   | <a href="#">srp54_ecoli</a> |
| P0AGD7 | SRP54_ECOLI | * P0AA25 | P0AGD7 | <a href="#">thio_ecoli</a>   | <a href="#">srp54_ecoli</a> |
| P0AGE0 | SSB_ECOLI   | * P00914 | P0AGE0 | <a href="#">phr_ecoli</a>    | <a href="#">ssb_ecoli</a>   |
| P0AGE0 | SSB_ECOLI   | * P24230 | P0AGE0 | <a href="#">recg_ecoli</a>   | <a href="#">ssb_ecoli</a>   |
| P0AGE0 | SSB_ECOLI   | * P12295 | P0AGE0 | <a href="#">ung_ecoli</a>    | <a href="#">ssb_ecoli</a>   |
| P0AGE0 | SSB_ECOLI   | * Q47269 | P0AGE0 | <a href="#">ybcn_ecoli</a>   | <a href="#">ssb_ecoli</a>   |
| P0ACA3 | SSPA_ECOLI  | none     |        |                              |                             |
| P0A832 | SSRP_ECOLI  | * P30745 | P0A832 | <a href="#">moaa_ecoli</a>   | <a href="#">ssrp_ecoli</a>  |
| P0A832 | SSRP_ECOLI  | * P0A7I4 | P0A832 | <a href="#">rf3_ecoli</a>    | <a href="#">ssrp_ecoli</a>  |
| P0A832 | SSRP_ECOLI  | * P0A847 | P0A832 | <a href="#">tgt_ecoli</a>    | <a href="#">ssrp_ecoli</a>  |
| P76072 | STFR_ECOLI  | * P06968 | P76072 | <a href="#">dut_ecoli</a>    | <a href="#">stfr_ecoli</a>  |
| P76072 | STFR_ECOLI  | * P0ABX5 | P76072 | <a href="#">flgg_ecoli</a>   | <a href="#">stfr_ecoli</a>  |
| P76072 | STFR_ECOLI  | * P76114 | P76072 | <a href="#">mcbr_ecoli</a>   | <a href="#">stfr_ecoli</a>  |
| P76072 | STFR_ECOLI  | * Q9F557 | P76072 | <a href="#">q9f557_ecoli</a> | <a href="#">stfr_ecoli</a>  |
| P76072 | STFR_ECOLI  | * P42604 | P76072 | <a href="#">uxaa_ecoli</a>   | <a href="#">stfr_ecoli</a>  |
| P76072 | STFR_ECOLI  | * P76017 | P76072 | <a href="#">ycgv_ecoli</a>   | <a href="#">stfr_ecoli</a>  |
| P76072 | STFR_ECOLI  | * P39199 | P76072 | <a href="#">yfcg_ecoli</a>   | <a href="#">stfr_ecoli</a>  |
| P0ACG1 | STPA_ECOLI  | * P0A6M4 | P0ACG1 | <a href="#">dtd_ecoli</a>    | <a href="#">stpa_ecoli</a>  |
| P0ACG1 | STPA_ECOLI  | * P06968 | P0ACG1 | <a href="#">dut_ecoli</a>    | <a href="#">stpa_ecoli</a>  |
| P0ACG1 | STPA_ECOLI  | * P0ACF8 | P0ACG1 | <a href="#">hns_ecoli</a>    | <a href="#">stpa_ecoli</a>  |
| P0ACG1 | STPA_ECOLI  | * P0ACF8 | P0ACG1 | <a href="#">hns_ecoli</a>    | <a href="#">stpa_ecoli</a>  |
| P0ACG1 | STPA_ECOLI  | * P30958 | P0ACG1 | <a href="#">mfd_ecoli</a>    | <a href="#">stpa_ecoli</a>  |
| P0ACG1 | STPA_ECOLI  | * P25738 | P0ACG1 | <a href="#">msyb_ecoli</a>   | <a href="#">stpa_ecoli</a>  |
| P0ACG1 | STPA_ECOLI  | * P0A759 | P0ACG1 | <a href="#">nagb_ecoli</a>   | <a href="#">stpa_ecoli</a>  |
| P0ACG1 | STPA_ECOLI  | * P0AFK9 | P0ACG1 | <a href="#">potd_ecoli</a>   | <a href="#">stpa_ecoli</a>  |
| P0ACG1 | STPA_ECOLI  | * P0AEI4 | P0ACG1 | <a href="#">rimo_ecoli</a>   | <a href="#">stpa_ecoli</a>  |
| P0ACG1 | STPA_ECOLI  | * P27253 | P0ACG1 | <a href="#">sbm_ecoli</a>    | <a href="#">stpa_ecoli</a>  |
| P0ACG1 | STPA_ECOLI  | * P33570 | P0ACG1 | <a href="#">tk2_ecoli</a>    | <a href="#">stpa_ecoli</a>  |
| P0ACG1 | STPA_ECOLI  | * P0AED0 | P0ACG1 | <a href="#">uspa_ecoli</a>   | <a href="#">stpa_ecoli</a>  |
| P0ACG1 | STPA_ECOLI  | * P0AFP6 | P0ACG1 | <a href="#">ybgj_ecoli</a>   | <a href="#">stpa_ecoli</a>  |
| P0ACG1 | STPA_ECOLI  | * P0A8Z0 | P0ACG1 | <a href="#">ycia_ecoli</a>   | <a href="#">stpa_ecoli</a>  |
| P0ACG1 | STPA_ECOLI  | * P0A8A0 | P0ACG1 | <a href="#">yebc_ecoli</a>   | <a href="#">stpa_ecoli</a>  |
| P0ACG1 | STPA_ECOLI  | * P39407 | P0ACG1 | <a href="#">yjjj_ecoli</a>   | <a href="#">stpa_ecoli</a>  |
| P0A836 | SUCC_ECOLI  | * P0AA25 | P0A836 | <a href="#">thio_ecoli</a>   | <a href="#">succ_ecoli</a>  |

|        |            |          |        |            |            |
|--------|------------|----------|--------|------------|------------|
| P0A836 | SUCC_ECOLI | * P0AA25 | P0A836 | thio_ecoli | succ_ecoli |
| P0AGE9 | SUCD_ECOLI | * P0A9P6 | P0AGE9 | dead_ecoli | sucd_ecoli |
| P0AGE9 | SUCD_ECOLI | * P0ACD4 | P0AGE9 | nifu_ecoli | sucd_ecoli |
| P0AGE9 | SUCD_ECOLI | * P0A836 | P0AGE9 | succ_ecoli | sucd_ecoli |
| P0AGE9 | SUCD_ECOLI | * P0A836 | P0AGE9 | succ_ecoli | sucd_ecoli |
| P0AGE9 | SUCD_ECOLI | * P0A836 | P0AGE9 | succ_ecoli | sucd_ecoli |
| P0AGE9 | SUCD_ECOLI | * P0AA25 | P0AGE9 | thio_ecoli | sucd_ecoli |
| P0AGE9 | SUCD_ECOLI | * P0AA25 | P0AGE9 | thio_ecoli | sucd_ecoli |
| P77499 | SUFC_ECOLI | * P05050 | P77499 | alkb_ecoli | sufc_ecoli |
| P77499 | SUFC_ECOLI | * P0A9P6 | P77499 | dead_ecoli | sufc_ecoli |
| P77499 | SUFC_ECOLI | * P0A707 | P77499 | if3_ecoli  | sufc_ecoli |
| P77499 | SUFC_ECOLI | * P77522 | P77499 | sufb_ecoli | sufc_ecoli |
| P77499 | SUFC_ECOLI | * Q47269 | P77499 | ybcn_ecoli | sufc_ecoli |
| P77499 | SUFC_ECOLI | * P0AGJ5 | P77499 | yfif_ecoli | sufc_ecoli |
| P77444 | SUFS_ECOLI | none     |        |            |            |
| P0ABZ6 | SURA_ECOLI | none     |        |            |            |
| P00957 | SYA_ECOLI  | * P24177 | P00957 | acrd_ecoli | sya_ecoli  |
| P00957 | SYA_ECOLI  | * P63284 | P00957 | clpb_ecoli | sya_ecoli  |
| P00957 | SYA_ECOLI  | * P0A6Y8 | P00957 | dnak_ecoli | sya_ecoli  |
| P00957 | SYA_ECOLI  | * P17169 | P00957 | glms_ecoli | sya_ecoli  |
| P00957 | SYA_ECOLI  | * P27249 | P00957 | glnd_ecoli | sya_ecoli  |
| P00957 | SYA_ECOLI  | * P0ACR9 | P00957 | mpra_ecoli | sya_ecoli  |
| P00957 | SYA_ECOLI  | * P24205 | P00957 | msbb_ecoli | sya_ecoli  |
| P00957 | SYA_ECOLI  | * P02918 | P00957 | pbpa_ecoli | sya_ecoli  |
| P00957 | SYA_ECOLI  | * P37765 | P00957 | rlub_ecoli | sya_ecoli  |
| P00957 | SYA_ECOLI  | * P06612 | P00957 | top1_ecoli | sya_ecoli  |
| P00957 | SYA_ECOLI  | * P45508 | P00957 | yfal_ecoli | sya_ecoli  |
| P00957 | SYA_ECOLI  | * P76464 | P00957 | yfas_ecoli | sya_ecoli  |
| P00957 | SYA_ECOLI  | * P52126 | P00957 | yfjk_ecoli | sya_ecoli  |
| P21888 | SYC_ECOLI  | * P32131 | P21888 | hemn_ecoli | syc_ecoli  |
| P21889 | SYD_ECOLI  | * P0ABI4 | P21889 | cora_ecoli | syd_ecoli  |
| P21889 | SYD_ECOLI  | * P31459 | P21889 | dgok_ecoli | syd_ecoli  |
| P21889 | SYD_ECOLI  | * P03004 | P21889 | dnaa_ecoli | syd_ecoli  |
| P21889 | SYD_ECOLI  | * P0A6Y8 | P21889 | dnak_ecoli | syd_ecoli  |
| P21889 | SYD_ECOLI  | * P04949 | P21889 | flic_ecoli | syd_ecoli  |
| P21889 | SYD_ECOLI  | * P08192 | P21889 | folc_ecoli | syd_ecoli  |
| P21889 | SYD_ECOLI  | * P05042 | P21889 | fumc_ecoli | syd_ecoli  |
| P21889 | SYD_ECOLI  | * P0AEP7 | P21889 | gcl_ecoli  | syd_ecoli  |

|        |            |   |        |        |                             |                            |
|--------|------------|---|--------|--------|-----------------------------|----------------------------|
| P21889 | SYD_ECOLI  | * | P0A796 | P21889 | <a href="#">k6pf1_ecoli</a> | <a href="#">syd_ecoli</a>  |
| P21889 | SYD_ECOLI  | * | P0A9I5 | P21889 | <a href="#">napd_ecoli</a>  | <a href="#">syd_ecoli</a>  |
| P21889 | SYD_ECOLI  | * | Q57083 | P21889 | <a href="#">perr_ecoli</a>  | <a href="#">syd_ecoli</a>  |
| P21889 | SYD_ECOLI  | * | P0ABS5 | P21889 | <a href="#">prim_ecoli</a>  | <a href="#">syd_ecoli</a>  |
| P21889 | SYD_ECOLI  | * | P0A7J3 | P21889 | <a href="#">rl10_ecoli</a>  | <a href="#">syd_ecoli</a>  |
| P21889 | SYD_ECOLI  | * | P0A7Z4 | P21889 | <a href="#">rpoa_ecoli</a>  | <a href="#">syd_ecoli</a>  |
| P21889 | SYD_ECOLI  | * | P0A7Z4 | P21889 | <a href="#">rpoa_ecoli</a>  | <a href="#">syd_ecoli</a>  |
| P21889 | SYD_ECOLI  | * | P37680 | P21889 | <a href="#">sgbe_ecoli</a>  | <a href="#">syd_ecoli</a>  |
| P21889 | SYD_ECOLI  | * | P77221 | P21889 | <a href="#">yahg_ecoli</a>  | <a href="#">syd_ecoli</a>  |
| P21889 | SYD_ECOLI  | * | P39165 | P21889 | <a href="#">ycho_ecoli</a>  | <a href="#">syd_ecoli</a>  |
| P21889 | SYD_ECOLI  | * | P77721 | P21889 | <a href="#">ydjf_ecoli</a>  | <a href="#">syd_ecoli</a>  |
|        |            |   |        |        |                             |                            |
| P04805 | SYE_ECOLI  | * | P0ABD8 | P04805 | <a href="#">bccp_ecoli</a>  | <a href="#">sy_e_coli</a>  |
| P04805 | SYE_ECOLI  | * | P0ABK5 | P04805 | <a href="#">cysk_ecoli</a>  | <a href="#">sy_e_coli</a>  |
| P04805 | SYE_ECOLI  | * | P0A6L0 | P04805 | <a href="#">deoc_ecoli</a>  | <a href="#">sy_e_coli</a>  |
| P04805 | SYE_ECOLI  | * | P0A6P9 | P04805 | <a href="#">eno_ecoli</a>   | <a href="#">sy_e_coli</a>  |
| P04805 | SYE_ECOLI  | * | P0AEM4 | P04805 | <a href="#">flgm_ecoli</a>  | <a href="#">sy_e_coli</a>  |
| P04805 | SYE_ECOLI  | * | P0ACK8 | P04805 | <a href="#">fucr_ecoli</a>  | <a href="#">sy_e_coli</a>  |
| P04805 | SYE_ECOLI  | * | P00946 | P04805 | <a href="#">mana_ecoli</a>  | <a href="#">sy_e_coli</a>  |
| P04805 | SYE_ECOLI  | * | P12994 | P04805 | <a href="#">ybh_b_ecoli</a> | <a href="#">sy_e_coli</a>  |
| P04805 | SYE_ECOLI  | * | P0AD10 | P04805 | <a href="#">yecj_ecoli</a>  | <a href="#">sy_e_coli</a>  |
| P04805 | SYE_ECOLI  | * | P46837 | P04805 | <a href="#">yhgf_ecoli</a>  | <a href="#">sy_e_coli</a>  |
|        |            |   |        |        |                             |                            |
| P07395 | SYFB_ECOLI | * | P46883 | P07395 | <a href="#">amo_ecoli</a>   | <a href="#">syfb_ecoli</a> |
| P07395 | SYFB_ECOLI | * | P0C7L2 | P07395 | <a href="#">paaj_ecoli</a>  | <a href="#">syfb_ecoli</a> |
| P07395 | SYFB_ECOLI | * | P08312 | P07395 | <a href="#">syfa_ecoli</a>  | <a href="#">syfb_ecoli</a> |
| P07395 | SYFB_ECOLI | * | P08312 | P07395 | <a href="#">syfa_ecoli</a>  | <a href="#">syfb_ecoli</a> |
| P07395 | SYFB_ECOLI | * | P08312 | P07395 | <a href="#">syfa_ecoli</a>  | <a href="#">syfb_ecoli</a> |
| P07395 | SYFB_ECOLI | * | P11875 | P07395 | <a href="#">syr_ecoli</a>   | <a href="#">syfb_ecoli</a> |
| P07395 | SYFB_ECOLI | * | P42604 | P07395 | <a href="#">uxaa_ecoli</a>  | <a href="#">syfb_ecoli</a> |
| P07395 | SYFB_ECOLI | * | P52126 | P07395 | <a href="#">yfjk_ecoli</a>  | <a href="#">syfb_ecoli</a> |
|        |            |   |        |        |                             |                            |
| P00960 | SYGA_ECOLI | * | P68688 | P00960 | <a href="#">glrx1_ecoli</a> | <a href="#">syga_ecoli</a> |
| P00960 | SYGA_ECOLI | * | P33232 | P00960 | <a href="#">lidd_ecoli</a>  | <a href="#">syga_ecoli</a> |
| P00960 | SYGA_ECOLI | * | P0A817 | P00960 | <a href="#">metk_ecoli</a>  | <a href="#">syga_ecoli</a> |
| P00960 | SYGA_ECOLI | * | P30748 | P00960 | <a href="#">moad_ecoli</a>  | <a href="#">syga_ecoli</a> |
| P00960 | SYGA_ECOLI | * | P30749 | P00960 | <a href="#">moae_ecoli</a>  | <a href="#">syga_ecoli</a> |
| P00960 | SYGA_ECOLI | * | P0A9X4 | P00960 | <a href="#">mreb_ecoli</a>  | <a href="#">syga_ecoli</a> |
|        |            |   |        |        |                             |                            |
| P00961 | SYGB_ECOLI | * | P0AES4 | P00961 | <a href="#">gyra_ecoli</a>  | <a href="#">sygb_ecoli</a> |
| P00961 | SYGB_ECOLI | * | P0AES6 | P00961 | <a href="#">gyrb_ecoli</a>  | <a href="#">sygb_ecoli</a> |
| P00961 | SYGB_ECOLI | * | P0A8D0 | P00961 | <a href="#">nrdr_ecoli</a>  | <a href="#">sygb_ecoli</a> |
| P00961 | SYGB_ECOLI | * | P15640 | P00961 | <a href="#">pur2_ecoli</a>  | <a href="#">sygb_ecoli</a> |
| P00961 | SYGB_ECOLI | * | P25741 | P00961 | <a href="#">rfap_ecoli</a>  | <a href="#">sygb_ecoli</a> |
| P00961 | SYGB_ECOLI | * | P0AEU7 | P00961 | <a href="#">skp_ecoli</a>   | <a href="#">sygb_ecoli</a> |

|        |            |          |        |            |            |
|--------|------------|----------|--------|------------|------------|
| P00961 | SYGB_ECOLI | * P0AGC7 | P00961 | smp_ecoli  | sygb_ecoli |
| P00956 | SYI_ECOLI  | * P32176 | P00956 | fdog_ecoli | syi_ecoli  |
| P00956 | SYI_ECOLI  | * P0AEM0 | P00956 | fkbx_ecoli | syi_ecoli  |
| P00956 | SYI_ECOLI  | * P31057 | P00956 | panb_ecoli | syi_ecoli  |
| P00956 | SYI_ECOLI  | * P30850 | P00956 | rnb_ecoli  | syi_ecoli  |
| P00956 | SYI_ECOLI  | * P0A8N5 | P00956 | syk2_ecoli | syi_ecoli  |
| P0A8N3 | SYK1_ECOLI | * P0AAM3 | P0A8N3 | hycp_ecoli | syk1_ecoli |
| P0A8N3 | SYK1_ECOLI | * P39346 | P0A8N3 | idnd_ecoli | syk1_ecoli |
| P0A8N3 | SYK1_ECOLI | * P61889 | P0A8N3 | mdh_ecoli  | syk1_ecoli |
| P0A8N3 | SYK1_ECOLI | * P31828 | P0A8N3 | pqq1_ecoli | syk1_ecoli |
| P0A8N3 | SYK1_ECOLI | * P36979 | P0A8N3 | rlmn_ecoli | syk1_ecoli |
| P0A8N3 | SYK1_ECOLI | * P27253 | P0A8N3 | sbm_ecoli  | syk1_ecoli |
| P0A8N3 | SYK1_ECOLI | * P11868 | P0A8N3 | tdcd_ecoli | syk1_ecoli |
| P0A8N3 | SYK1_ECOLI | * P37440 | P0A8N3 | ucpa_ecoli | syk1_ecoli |
| P0A8N3 | SYK1_ECOLI | * P43672 | P0A8N3 | uup_ecoli  | syk1_ecoli |
| P0A8N3 | SYK1_ECOLI | * P0AFP2 | P0A8N3 | ybaz_ecoli | syk1_ecoli |
| P0A8N3 | SYK1_ECOLI | * P33030 | P0A8N3 | yeir_ecoli | syk1_ecoli |
| P0A8N5 | SYK2_ECOLI | * P0ABD5 | P0A8N5 | acca_ecoli | syk2_ecoli |
| P0A8N5 | SYK2_ECOLI | * P32177 | P0A8N5 | fdhd_ecoli | syk2_ecoli |
| P0A8N5 | SYK2_ECOLI | * P68066 | P0A8N5 | grca_ecoli | syk2_ecoli |
| P0A8N5 | SYK2_ECOLI | * P0A9X4 | P0A8N5 | mreb_ecoli | syk2_ecoli |
| P0A8N5 | SYK2_ECOLI | * P36979 | P0A8N5 | rlmn_ecoli | syk2_ecoli |
| P0A8N5 | SYK2_ECOLI | * P0ACA3 | P0A8N5 | sspa_ecoli | syk2_ecoli |
| P0A8N5 | SYK2_ECOLI | * P0A858 | P0A8N5 | tpis_ecoli | syk2_ecoli |
| P07813 | SYL_ECOLI  | * P15042 | P07813 | dnlj_ecoli | syl_ecoli  |
| P07813 | SYL_ECOLI  | * P61889 | P07813 | mdh_ecoli  | syl_ecoli  |
| P07813 | SYL_ECOLI  | * P40874 | P07813 | mtox_ecoli | syl_ecoli  |
| P07813 | SYL_ECOLI  | * P06612 | P07813 | top1_ecoli | syl_ecoli  |
| P00959 | SYM_ECOLI  | * P23862 | P00959 | pric_ecoli | sym_ecoli  |
| P00959 | SYM_ECOLI  | * Q57261 | P00959 | trud_ecoli | sym_ecoli  |
| P0A8M0 | SYN_ECOLI  | * P21889 | P0A8M0 | syd_ecoli  | syn_ecoli  |
| P0A8M0 | SYN_ECOLI  | * P0A8G3 | P0A8M0 | uxac_ecoli | syn_ecoli  |
| P16659 | SYP_ECOLI  | * P07363 | P16659 | chea_ecoli | syp_ecoli  |
| P16659 | SYP_ECOLI  | * P17846 | P16659 | cysi_ecoli | syp_ecoli  |
| P16659 | SYP_ECOLI  | * P0A6Y8 | P16659 | dnak_ecoli | syp_ecoli  |
| P16659 | SYP_ECOLI  | * P0ABQ4 | P16659 | dyr_ecoli  | syp_ecoli  |
| P16659 | SYP_ECOLI  | * P0AEM6 | P16659 | flia_ecoli | syp_ecoli  |
| P16659 | SYP_ECOLI  | * P04949 | P16659 | flic_ecoli | syp_ecoli  |

|        |           |          |        |             |           |
|--------|-----------|----------|--------|-------------|-----------|
| P16659 | SYP_ECOLI | * P0ABZ1 | P16659 | flig_ecoli  | syp_ecoli |
| P16659 | SYP_ECOLI | * P52612 | P16659 | flii_ecoli  | syp_ecoli |
| P16659 | SYP_ECOLI | * P0C054 | P16659 | ibpa_ecoli  | syp_ecoli |
| P16659 | SYP_ECOLI | * P77432 | P16659 | lsrk_ecoli  | syp_ecoli |
| P16659 | SYP_ECOLI | * P27896 | P16659 | narq_ecoli  | syp_ecoli |
| P16659 | SYP_ECOLI | * P07004 | P16659 | proa_ecoli  | syp_ecoli |
| P16659 | SYP_ECOLI | * P0AG07 | P16659 | rpe_ecoli   | syp_ecoli |
| P16659 | SYP_ECOLI | * P28904 | P16659 | trec_ecoli  | syp_ecoli |
| P16659 | SYP_ECOLI | * P27836 | P16659 | wecg_ecoli  | syp_ecoli |
|        |           |          |        |             |           |
| P00962 | SYQ_ECOLI | * P0ABK5 | P00962 | cysk_ecoli  | syq_ecoli |
| P00962 | SYQ_ECOLI | * P24169 | P00962 | dcos_ecoli  | syq_ecoli |
| P00962 | SYQ_ECOLI | * P0A6Q6 | P00962 | fabz_ecoli  | syq_ecoli |
| P00962 | SYQ_ECOLI | * P21645 | P00962 | lpxd_ecoli  | syq_ecoli |
| P00962 | SYQ_ECOLI | * P0A8I5 | P00962 | trmb_ecoli  | syq_ecoli |
|        |           |          |        |             |           |
| P11875 | SYR_ECOLI | * P0AES4 | P11875 | gyra_ecoli  | syr_ecoli |
| P11875 | SYR_ECOLI | * P09158 | P11875 | spee_ecoli  | syr_ecoli |
| P11875 | SYR_ECOLI | * P77165 | P11875 | yagt_ecoli  | syr_ecoli |
| P11875 | SYR_ECOLI | * P0A8A0 | P11875 | yebc_ecoli  | syr_ecoli |
|        |           |          |        |             |           |
| POA8L1 | SYS_ECOLI | * P05100 | POA8L1 | 3mg1_ecoli  | sys_ecoli |
| POA8L1 | SYS_ECOLI | * P0A972 | POA8L1 | cspe_ecoli  | sys_ecoli |
| POA8L1 | SYS_ECOLI | * P0AEE8 | POA8L1 | dma_ecoli   | sys_ecoli |
| POA8L1 | SYS_ECOLI | * P42593 | POA8L1 | fadh_ecoli  | sys_ecoli |
| POA8L1 | SYS_ECOLI | * P0A9K9 | POA8L1 | slyd_ecoli  | sys_ecoli |
| POA8L1 | SYS_ECOLI | * P0ACA3 | POA8L1 | sspa_ecoli  | sys_ecoli |
| POA8L1 | SYS_ECOLI | * P0A8N5 | POA8L1 | syk2_ecoli  | sys_ecoli |
| POA8L1 | SYS_ECOLI | * P64479 | POA8L1 | ydiz_ecoli  | sys_ecoli |
| POA8L1 | SYS_ECOLI | * P31443 | POA8L1 | yidf_ecoli  | sys_ecoli |
|        |           |          |        |             |           |
| POA8M3 | SYT_ECOLI | * P46883 | POA8M3 | amo_ecoli   | syt_ecoli |
| POA8M3 | SYT_ECOLI | * P28249 | POA8M3 | asma_ecoli  | syt_ecoli |
| POA8M3 | SYT_ECOLI | * P0A9F3 | POA8M3 | cysb_ecoli  | syt_ecoli |
| POA8M3 | SYT_ECOLI | * P0ACB0 | POA8M3 | dnab_ecoli  | syt_ecoli |
| POA8M3 | SYT_ECOLI | * P0ABQ4 | POA8M3 | dyr_ecoli   | syt_ecoli |
| POA8M3 | SYT_ECOLI | * P0AC55 | POA8M3 | glnk_ecoli  | syt_ecoli |
| POA8M3 | SYT_ECOLI | * P62707 | POA8M3 | gpma_ecoli  | syt_ecoli |
| POA8M3 | SYT_ECOLI | * P0A6W5 | POA8M3 | grea_ecoli  | syt_ecoli |
| POA8M3 | SYT_ECOLI | * P0A754 | POA8M3 | keff_ecoli  | syt_ecoli |
| POA8M3 | SYT_ECOLI | * P21599 | POA8M3 | kpyk2_ecoli | syt_ecoli |
| POA8M3 | SYT_ECOLI | * P22731 | POA8M3 | livf_ecoli  | syt_ecoli |
| POA8M3 | SYT_ECOLI | * P02358 | POA8M3 | rs6_ecoli   | syt_ecoli |
| POA8M3 | SYT_ECOLI | * P0AFZ3 | POA8M3 | sspb_ecoli  | syt_ecoli |
| POA8M3 | SYT_ECOLI | * Q47719 | POA8M3 | y4286_ecoli | syt_ecoli |



|        |            |          |        |                             |                            |
|--------|------------|----------|--------|-----------------------------|----------------------------|
| P0A8M3 | SYT_ECOLI  | * P28634 | P0A8M3 | yaeb_ecoli                  | syt_ecoli                  |
| P0A8M3 | SYT_ECOLI  | * P0AAQ6 | P0A8M3 | ybaa_ecoli                  | syt_ecoli                  |
| P0A8M3 | SYT_ECOLI  | * P41039 | P0A8M3 | ybii_ecoli                  | syt_ecoli                  |
| P0A8M3 | SYT_ECOLI  | * P0AB06 | P0A8M3 | ycbk_ecoli                  | syt_ecoli                  |
| P0A8M3 | SYT_ECOLI  | * P76100 | P0A8M3 | ydck_ecoli                  | syt_ecoli                  |
| P0A8M3 | SYT_ECOLI  | * P77286 | P0A8M3 | ydeu_ecoli                  | syt_ecoli                  |
| P0A8M3 | SYT_ECOLI  | * P76594 | P0A8M3 | yfiq_ecoli                  | syt_ecoli                  |
| P0A8M3 | SYT_ECOLI  | * P0A8Y5 | P0A8M3 | yida_ecoli                  | syt_ecoli                  |
| P0A8M3 | SYT_ECOLI  | * P75992 | P0A8M3 | ymga_ecoli                  | syt_ecoli                  |
|        |            |          |        |                             |                            |
| P07118 | SYV_ECOLI  | * P0CE47 | P07118 | <a href="#">eftu1_ecoli</a> | <a href="#">syv_ecoli</a>  |
| P07118 | SYV_ECOLI  | * P37330 | P07118 | <a href="#">masz_ecoli</a>  | <a href="#">syv_ecoli</a>  |
| P07118 | SYV_ECOLI  | * Q46814 | P07118 | xdhd_ecoli                  | syv_ecoli                  |
| P07118 | SYV_ECOLI  | * P75767 | P07118 | ybhk_ecoli                  | syv_ecoli                  |
|        |            |          |        |                             |                            |
| P00954 | SYW_ECOLI  | none     |        |                             |                            |
|        |            |          |        |                             |                            |
| P0AGJ9 | SYV_ECOLI  | * P0AD61 | P0AGJ9 | <a href="#">kpyk1_ecoli</a> | <a href="#">syy_ecoli</a>  |
|        |            |          |        |                             |                            |
| P25239 | T257_ECOLX | none     |        |                             |                            |
|        |            |          |        |                             |                            |
| P0A867 | TALA_ECOLI | * P37794 | P0A867 | chbg_ecoli                  | tala_ecoli                 |
| P0A867 | TALA_ECOLI | * P76129 | P0A867 | <a href="#">dosp_ecoli</a>  | <a href="#">tala_ecoli</a> |
| P0A867 | TALA_ECOLI | * P77445 | P0A867 | eute_ecoli                  | tala_ecoli                 |
| P0A867 | TALA_ECOLI | * P28305 | P0A867 | pabc_ecoli                  | tala_ecoli                 |
| P0A867 | TALA_ECOLI | * P33643 | P0A867 | rlud_ecoli                  | tala_ecoli                 |
| P0A867 | TALA_ECOLI | * P37610 | P0A867 | taud_ecoli                  | tala_ecoli                 |
| P0A867 | TALA_ECOLI | * P77260 | P0A867 | ydfi_ecoli                  | tala_ecoli                 |
| P0A867 | TALA_ECOLI | * P11664 | P0A867 | yggc_ecoli                  | tala_ecoli                 |
|        |            |          |        |                             |                            |
| P0A870 | TALB_ECOLI | * P77425 | P0A870 | <a href="#">allc_ecoli</a>  | <a href="#">talb_ecoli</a> |
| P0A870 | TALB_ECOLI | * P37617 | P0A870 | <a href="#">atzn_ecoli</a>  | <a href="#">talb_ecoli</a> |
| P0A870 | TALB_ECOLI | * P0ADR6 | P0A870 | <a href="#">rlmm_ecoli</a>  | <a href="#">talb_ecoli</a> |
| P0A870 | TALB_ECOLI | * P0AA25 | P0A870 | <a href="#">thio_ecoli</a>  | <a href="#">talb_ecoli</a> |
|        |            |          |        |                             |                            |
| P0A9T4 | TAS_ECOLI  | none     |        |                             |                            |
|        |            |          |        |                             |                            |
| P69428 | TATA_ECOLI | none     |        |                             |                            |
|        |            |          |        |                             |                            |
| P0AGL2 | TDCF_ECOLI | none     |        |                             |                            |
|        |            |          |        |                             |                            |
| P07913 | TDH_ECOLI  | * P0AB77 | P07913 | <a href="#">kbl_ecoli</a>   | <a href="#">tdh_ecoli</a>  |
| P07913 | TDH_ECOLI  | * P76535 | P07913 | murq_ecoli                  | tdh_ecoli                  |
| P07913 | TDH_ECOLI  | * P64483 | P07913 | <a href="#">yeak_ecoli</a>  | <a href="#">tdh_ecoli</a>  |

|        |            |          |        |                             |                            |
|--------|------------|----------|--------|-----------------------------|----------------------------|
| P25397 | TEHB_ECOLI | * P0A968 | P25397 | <a href="#">cspd_ecoli</a>  | <a href="#">tehb_ecoli</a> |
| P25397 | TEHB_ECOLI | * P0A9R4 | P25397 | <a href="#">fer_ecoli</a>   | <a href="#">tehb_ecoli</a> |
| P25397 | TEHB_ECOLI | * P76514 | P25397 | <a href="#">yfdr_ecoli</a>  | <a href="#">tehb_ecoli</a> |
| P0AGG2 | TESB_ECOLI | none     |        |                             |                            |
| P0A847 | TGT_ECOLI  | * P0AES0 | P0A847 | <a href="#">gsp_ecoli</a>   | <a href="#">tgt_ecoli</a>  |
| P0A847 | TGT_ECOLI  | * P0A6X3 | P0A847 | <a href="#">hfg_ecoli</a>   | <a href="#">tgt_ecoli</a>  |
| P0A847 | TGT_ECOLI  | * P0A7I4 | P0A847 | <a href="#">rf3_ecoli</a>   | <a href="#">tgt_ecoli</a>  |
| P0A847 | TGT_ECOLI  | * P21499 | P0A847 | <a href="#">rnr_ecoli</a>   | <a href="#">tgt_ecoli</a>  |
| P0A847 | TGT_ECOLI  | * P03018 | P0A847 | <a href="#">uvrd_ecoli</a>  | <a href="#">tgt_ecoli</a>  |
| P07464 | THGA_ECOLI | * P0A850 | P07464 | <a href="#">tig_ecoli</a>   | <a href="#">thga_ecoli</a> |
| P07464 | THGA_ECOLI | * P77295 | P07464 | <a href="#">ygav_ecoli</a>  | <a href="#">thga_ecoli</a> |
| P77718 | THII_ECOLI | * P0A951 | P77718 | <a href="#">atda_ecoli</a>  | <a href="#">thii_ecoli</a> |
| P77718 | THII_ECOLI | * P05523 | P77718 | <a href="#">fpg_ecoli</a>   | <a href="#">thii_ecoli</a> |
| P77718 | THII_ECOLI | * P77791 | P77718 | <a href="#">maa_ecoli</a>   | <a href="#">thii_ecoli</a> |
| P77718 | THII_ECOLI | * P0A805 | P77718 | <a href="#">rrf_ecoli</a>   | <a href="#">thii_ecoli</a> |
| P77718 | THII_ECOLI | * P0AGG4 | P77718 | <a href="#">thio2_ecoli</a> | <a href="#">thii_ecoli</a> |
| P77718 | THII_ECOLI | * P0AA97 | P77718 | <a href="#">yaeq_ecoli</a>  | <a href="#">thii_ecoli</a> |
| P77718 | THII_ECOLI | * P37052 | P77718 | <a href="#">ychj_ecoli</a>  | <a href="#">thii_ecoli</a> |
| P77718 | THII_ECOLI | * P08245 | P77718 | <a href="#">ycih_ecoli</a>  | <a href="#">thii_ecoli</a> |
| P77718 | THII_ECOLI | * P33030 | P77718 | <a href="#">yeir_ecoli</a>  | <a href="#">thii_ecoli</a> |
| Q46948 | THIJ_ECOLI | none     |        |                             |                            |
| P75948 | THIK_ECOLI | none     |        |                             |                            |
| P0AGG0 | THIL_ECOLI | none     |        |                             |                            |
| P0AA25 | THIO_ECOLI | none     |        |                             |                            |
| P00934 | THRC_ECOLI | none     |        |                             |                            |
| P31142 | THTM_ECOLI | * P0A8A0 | P31142 | <a href="#">yebc_ecoli</a>  | <a href="#">thtm_ecoli</a> |
| Q9XD84 | TIBA_ECOLX | none     |        |                             |                            |
| P0A850 | TIG_ECOLI  | * P0A6F9 | P0A850 | <a href="#">ch10_ecoli</a>  | <a href="#">tig_ecoli</a>  |
| P0A850 | TIG_ECOLI  | * P0A6F9 | P0A850 | <a href="#">ch10_ecoli</a>  | <a href="#">tig_ecoli</a>  |
| P0A850 | TIG_ECOLI  | * P0A6F5 | P0A850 | <a href="#">ch60_ecoli</a>  | <a href="#">tig_ecoli</a>  |
| P0A850 | TIG_ECOLI  | * P0A6G7 | P0A850 | <a href="#">clpp_ecoli</a>  | <a href="#">tig_ecoli</a>  |
| P0A850 | TIG_ECOLI  | * P36943 | P0A850 | <a href="#">eaeh_ecoli</a>  | <a href="#">tig_ecoli</a>  |
| P0A850 | TIG_ECOLI  | * P0A6Q3 | P0A850 | <a href="#">faba_ecoli</a>  | <a href="#">tig_ecoli</a>  |

|          |            |   |        |        |             |            |
|----------|------------|---|--------|--------|-------------|------------|
| POA850   | TIG_ECOLI  | * | P0A6S0 | POA850 | flgh_ecoli  | tig_ecoli  |
| POA850   | TIG_ECOLI  | * | P0AFS3 | POA850 | folm_ecoli  | tig_ecoli  |
| POA850   | TIG_ECOLI  | * | P0A9Z1 | POA850 | glnb_ecoli  | tig_ecoli  |
| POA850   | TIG_ECOLI  | * | P0A6X3 | POA850 | hfq_ecoli   | tig_ecoli  |
| POA850   | TIG_ECOLI  | * | P0ACF8 | POA850 | hns_ecoli   | tig_ecoli  |
| POA850   | TIG_ECOLI  | * | P0AAM3 | POA850 | hypc_ecoli  | tig_ecoli  |
| POA850   | TIG_ECOLI  | * | P0A7A9 | POA850 | ipyr_ecoli  | tig_ecoli  |
| POA850   | TIG_ECOLI  | * | P0A7A9 | POA850 | ipyr_ecoli  | tig_ecoli  |
| POA850   | TIG_ECOLI  | * | P21599 | POA850 | kpyk2_ecoli | tig_ecoli  |
| POA850   | TIG_ECOLI  | * | P21599 | POA850 | kpyk2_ecoli | tig_ecoli  |
| POA850   | TIG_ECOLI  | * | P0A817 | POA850 | metk_ecoli  | tig_ecoli  |
| POA850   | TIG_ECOLI  | * | P0A910 | POA850 | ompa_ecoli  | tig_ecoli  |
| POA850   | TIG_ECOLI  | * | P75793 | POA850 | pflf_ecoli  | tig_ecoli  |
| POA850   | TIG_ECOLI  | * | P0A9M8 | POA850 | pta_ecoli   | tig_ecoli  |
| POA850   | TIG_ECOLI  | * | P0A7D7 | POA850 | pur7_ecoli  | tig_ecoli  |
| POA850   | TIG_ECOLI  | * | P0A7D7 | POA850 | pur7_ecoli  | tig_ecoli  |
| POA850   | TIG_ECOLI  | * | P04983 | POA850 | rbsa_ecoli  | tig_ecoli  |
| POA850   | TIG_ECOLI  | * | P0A800 | POA850 | rpoz_ecoli  | tig_ecoli  |
| POA850   | TIG_ECOLI  | * | P02359 | POA850 | rs7_ecoli   | tig_ecoli  |
| POA850   | TIG_ECOLI  | * | P0A8G3 | POA850 | uxac_ecoli  | tig_ecoli  |
| POA850   | TIG_ECOLI  | * | P64476 | POA850 | ydh_ecoli   | tig_ecoli  |
| POA850   | TIG_ECOLI  | * | P39199 | POA850 | yfcb_ecoli  | tig_ecoli  |
| POA850   | TIG_ECOLI  | * | P39199 | POA850 | yfcb_ecoli  | tig_ecoli  |
| P27302   | TKT1_ECOLI |   | none   |        |             |            |
| Q46731   | TN5P_ECOLX |   | none   |        |             |            |
| Q46731-2 | TN5P_ECOLX |   | none   |        |             |            |
| POA853   | TNAA_ECOLI | * | P09373 | Q8FBV2 | pflb_ecoli  | tnaa_ecol6 |
| POA853   | TNAA_ECOLI | * | P31658 | POA853 | hcha_ecoli  | tnaa_ecoli |
| POA853   | TNAA_ECOLI | * | P77319 | POA853 | hsccl_ecoli | tnaa_ecoli |
| POA853   | TNAA_ECOLI | * | P38051 | POA853 | menf_ecoli  | tnaa_ecoli |
| POA853   | TNAA_ECOLI | * | Q46865 | POA853 | mqsrl_ecoli | tnaa_ecoli |
| POA853   | TNAA_ECOLI | * | P0A8V0 | POA853 | rnz_ecoli   | tnaa_ecoli |
| POA853   | TNAA_ECOLI | * | P0A8N5 | POA853 | syk2_ecoli  | tnaa_ecoli |
| POA853   | TNAA_ECOLI | * | Q47537 | POA853 | taua_ecoli  | tnaa_ecoli |
| POA853   | TNAA_ECOLI | * | P0AA25 | POA853 | thio_ecoli  | tnaa_ecoli |
| POA853   | TNAA_ECOLI | * | P60472 | POA853 | upps_ecoli  | tnaa_ecoli |
| P13694   | TNP7_ECOLX |   | none   |        |             |            |
| POA855   | TOLB_ECOLI |   | none   |        |             |            |
| P06612   | TOP1_ECOLI | * | P0AAF6 | P06612 | artp_ecoli  | top1_ecoli |

|          |             |   |        |        |                              |                            |
|----------|-------------|---|--------|--------|------------------------------|----------------------------|
| P06612   | TOP1_ECOLI  | * | P0A9Y6 | P06612 | <a href="#">cspc_ecoli</a>   | <a href="#">top1_ecoli</a> |
| P06612   | TOP1_ECOLI  | * | P31068 | P06612 | <a href="#">flih_ecoli</a>   | <a href="#">top1_ecoli</a> |
| P06612   | TOP1_ECOLI  | * | P0A9S3 | P06612 | <a href="#">gatd_ecoli</a>   | <a href="#">top1_ecoli</a> |
| P06612   | TOP1_ECOLI  | * | P27249 | P06612 | <a href="#">glnd_ecoli</a>   | <a href="#">top1_ecoli</a> |
| P06612   | TOP1_ECOLI  | * | P28905 | P06612 | <a href="#">holc_ecoli</a>   | <a href="#">top1_ecoli</a> |
| P06612   | TOP1_ECOLI  | * | P28905 | P06612 | <a href="#">holc_ecoli</a>   | <a href="#">top1_ecoli</a> |
| P06612   | TOP1_ECOLI  | * | P0ABS8 | P06612 | <a href="#">hole_ecoli</a>   | <a href="#">top1_ecoli</a> |
| P06612   | TOP1_ECOLI  | * | P77319 | P06612 | <a href="#">hscd_ecoli</a>   | <a href="#">top1_ecoli</a> |
| P06612   | TOP1_ECOLI  | * | P19930 | P06612 | <a href="#">hyad_ecoli</a>   | <a href="#">top1_ecoli</a> |
| P06612   | TOP1_ECOLI  | * | P39377 | P06612 | <a href="#">iada_ecoli</a>   | <a href="#">top1_ecoli</a> |
| P06612   | TOP1_ECOLI  | * | P24205 | P06612 | <a href="#">msbb_ecoli</a>   | <a href="#">top1_ecoli</a> |
| P06612   | TOP1_ECOLI  | * | P52647 | P06612 | <a href="#">nifj_ecoli</a>   | <a href="#">top1_ecoli</a> |
| P06612   | TOP1_ECOLI  | * | P15043 | P06612 | <a href="#">recq_ecoli</a>   | <a href="#">top1_ecoli</a> |
| P06612   | TOP1_ECOLI  | * | P77611 | P06612 | <a href="#">rnfc_ecoli</a>   | <a href="#">top1_ecoli</a> |
| P06612   | TOP1_ECOLI  | * | P0A7Y4 | P06612 | <a href="#">rnh_ecoli</a>    | <a href="#">top1_ecoli</a> |
| P06612   | TOP1_ECOLI  | * | P0A7Y4 | P06612 | <a href="#">rnh_ecoli</a>    | <a href="#">top1_ecoli</a> |
| P06612   | TOP1_ECOLI  | * | P36929 | P06612 | <a href="#">rsmb_ecoli</a>   | <a href="#">top1_ecoli</a> |
| P06612   | TOP1_ECOLI  | * | P15373 | P06612 | <a href="#">soha_ecoli</a>   | <a href="#">top1_ecoli</a> |
| P06612   | TOP1_ECOLI  | * | P0A850 | P06612 | <a href="#">tig_ecoli</a>    | <a href="#">top1_ecoli</a> |
| P06612   | TOP1_ECOLI  | * | P0A879 | P06612 | <a href="#">trpb_ecoli</a>   | <a href="#">top1_ecoli</a> |
| P06612   | TOP1_ECOLI  | * | P77279 | P06612 | <a href="#">ybbl_ecoli</a>   | <a href="#">top1_ecoli</a> |
| P06612   | TOP1_ECOLI  | * | P77627 | P06612 | <a href="#">yber_ecoli</a>   | <a href="#">top1_ecoli</a> |
| P06612   | TOP1_ECOLI  | * | P27862 | P06612 | <a href="#">yigz_ecoli</a>   | <a href="#">top1_ecoli</a> |
| P33226   | TORC_ECOLI  | * | P10441 | P33226 | <a href="#">lpxb_ecoli</a>   | <a href="#">torc_ecoli</a> |
| P52005   | TORY_ECOLI  | * | Q9F541 | P52005 | <a href="#">q9f541_ecolx</a> | <a href="#">tory_ecoli</a> |
| P0A862   | TPX_ECOLI   | * | P0ABT2 | P0A862 | <a href="#">dps_ecoli</a>    | <a href="#">tpx_ecoli</a>  |
| P0A862   | TPX_ECOLI   | * | P0ACE7 | P0A862 | <a href="#">hint_ecoli</a>   | <a href="#">tpx_ecoli</a>  |
| P0A862   | TPX_ECOLI   | * | P37906 | P0A862 | <a href="#">puub_ecoli</a>   | <a href="#">tpx_ecoli</a>  |
| P0A862   | TPX_ECOLI   | * | P76422 | P0A862 | <a href="#">thid_ecoli</a>   | <a href="#">tpx_ecoli</a>  |
| P0A862   | TPX_ECOLI   | * | P0AA25 | P0A862 | <a href="#">thio_ecoli</a>   | <a href="#">tpx_ecoli</a>  |
| P14565   | TRAI1_ECOLI |   | none   |        |                              |                            |
| P14565-2 | TRAI1_ECOLI |   | none   |        |                              |                            |
| P22706   | TRAI2_ECOLX |   | none   |        |                              |                            |
| Q00186   | TRAM4_ECOLX |   | none   |        |                              |                            |
| P71198   | TRAM5_ECOLX |   | none   |        |                              |                            |
| P24082   | TRAN_ECOLI  |   | none   |        |                              |                            |

|        |             |   |        |        |            |            |
|--------|-------------|---|--------|--------|------------|------------|
| P28904 | TREC_ECOLI  |   | none   |        |            |            |
| P36673 | TRER_ECOLI  | * | P39280 | P36673 | yjek_ecoli | trer_ecoli |
| P36673 | TRER_ECOLI  | * | P39333 | P36673 | yjgi_ecoli | trer_ecoli |
| P0A8I5 | TRMB_ECOLI  | * | Q47153 | P0A8I5 | fhia_ecoli | trmb_ecoli |
| P0A8I5 | TRMB_ECOLI  | * | P46854 | P0A8I5 | yhhy_ecoli | trmb_ecoli |
| P0AGJ2 | TRMH_ECOLI  | * | P0AG24 | P0AGJ2 | spot_ecoli | trmh_ecoli |
| P0AGJ2 | TRMH_ECOLI  | * | P77627 | P0AGJ2 | yber_ecoli | trmh_ecoli |
| P0AE01 | TRMJ_ECOLI  | * | P0AEF4 | P0AE01 | dpia_ecoli | trmj_ecoli |
| P0AE01 | TRMJ_ECOLI  | * | P27241 | P0AE01 | rfaz_ecoli | trmj_ecoli |
| P60340 | TRUB_ECOLI  |   | none   |        |            |            |
| P0A9P4 | TRXB_ECOLI  | * | P0ACJ0 | P0A9P4 | lrp_ecoli  | trxb_ecoli |
| P0A9P4 | TRXB_ECOLI  | * | P33136 | P0A9P4 | opgg_ecoli | trxb_ecoli |
| P0A9P4 | TRXB_ECOLI  | * | P0AA25 | P0A9P4 | thio_ecoli | trxb_ecoli |
| P0A9P4 | TRXB_ECOLI  | * | P75914 | P0A9P4 | ycdx_ecoli | trxb_ecoli |
| P16525 | TUS_ECOLI   |   | none   |        |            |            |
| P45531 | TUSC_ECOLI  | * | P36659 | P45531 | cbpa_ecoli | tusc_ecoli |
| P32132 | TYP_A_ECOLI | * | P0A898 | P32132 | ybey_ecoli | typa_ecoli |
| P32132 | TYP_A_ECOLI | * | P27862 | P32132 | yigz_ecoli | typa_ecoli |
| P07604 | TYRR_ECOLI  | * | P10902 | P07604 | nadb_ecoli | tyrr_ecoli |
| P07604 | TYRR_ECOLI  | * | P04391 | P07604 | otc1_ecoli | tyrr_ecoli |
| P0A6A0 | UBIB_ECOLI  | * | P77218 | P0A6A0 | eutd_ecoli | ubib_ecoli |
| P0A6A0 | UBIB_ECOLI  | * | P28905 | P0A6A0 | holc_ecoli | ubib_ecoli |
| P0A6A0 | UBIB_ECOLI  | * | P0ABS8 | P0A6A0 | hole_ecoli | ubib_ecoli |
| P0A6A0 | UBIB_ECOLI  | * | P32162 | P0A6A0 | yiis_ecoli | ubib_ecoli |
| P75728 | UBIF_ECOLI  | * | P0ADQ2 | P75728 | yiid_ecoli | ubif_ecoli |
| P12758 | UDP_ECOLI   | * | P0A9F9 | P12758 | metr_ecoli | udp_ecoli  |
| P12758 | UDP_ECOLI   | * | P0AA25 | P12758 | thio_ecoli | udp_ecoli  |
| P39304 | ULAD_ECOLI  | * | P27249 | P39304 | glnd_ecoli | ulad_ecoli |
| P0A9W0 | ULAR_ECOLI  | * | P45523 | P0A9W0 | fkba_ecoli | ular_ecoli |
| P0A9W0 | ULAR_ECOLI  | * | P76594 | P0A9W0 | yfiq_ecoli | ular_ecoli |

|        |             |          |        |             |            |
|--------|-------------|----------|--------|-------------|------------|
| P0A8F0 | UPP_ECOLI   | * P76483 | P0A8F0 | yfbm_ecoli  | upp_ecoli  |
| P32326 | URER_ECOLDX | none     |        |             |            |
| P08390 | USG_ECOLI   | * P0A6K3 | P08390 | def_ecoli   | usg_ecoli  |
| P0AED0 | USPA_ECOLI  | * P0C054 | P0AED0 | ibpa_ecoli  | uspa_ecoli |
| P0AED0 | USPA_ECOLI  | * P0AFF6 | P0AED0 | nusa_ecoli  | uspa_ecoli |
| P0AED0 | USPA_ECOLI  | * P0A7E9 | P0AED0 | pyrh_ecoli  | uspa_ecoli |
| P0AAB8 | USPD_ECOLI  | * P32162 | P0AAB8 | yiis_ecoli  | uspd_ecoli |
| P0AAC0 | USPE_ECOLI  | none     |        |             |            |
| P37903 | USPF_ECOLI  | none     |        |             |            |
| P39177 | USPG_ECOLI  | * P30859 | P39177 | arti_ecoli  | uspg_ecoli |
| P39177 | USPG_ECOLI  | * P30860 | P39177 | artj_ecoli  | uspg_ecoli |
| P39177 | USPG_ECOLI  | * P0A6F5 | P39177 | ch60_ecoli  | uspg_ecoli |
| P39177 | USPG_ECOLI  | * P0A9H9 | P39177 | chez_ecoli  | uspg_ecoli |
| P39177 | USPG_ECOLI  | * P76213 | P39177 | cho_ecoli   | uspg_ecoli |
| P39177 | USPG_ECOLI  | * P36995 | P39177 | cspb_ecoli  | uspg_ecoli |
| P39177 | USPG_ECOLI  | * P0A9Y6 | P39177 | cspc_ecoli  | uspg_ecoli |
| P39177 | USPG_ECOLI  | * P0A972 | P39177 | cspe_ecoli  | uspg_ecoli |
| P39177 | USPG_ECOLI  | * P0A978 | P39177 | cspg_ecoli  | uspg_ecoli |
| P39177 | USPG_ECOLI  | * P0A986 | P39177 | cspi_ecoli  | uspg_ecoli |
| P39177 | USPG_ECOLI  | * P0ACF4 | P39177 | dbhb_ecoli  | uspg_ecoli |
| P39177 | USPG_ECOLI  | * P0ABS1 | P39177 | dksa_ecoli  | uspg_ecoli |
| P39177 | USPG_ECOLI  | * P0CE47 | P39177 | eftu1_ecoli | uspg_ecoli |
| P39177 | USPG_ECOLI  | * P0ADI4 | P39177 | entb_ecoli  | uspg_ecoli |
| P39177 | USPG_ECOLI  | * P09030 | P39177 | ex3_ecoli   | uspg_ecoli |
| P39177 | USPG_ECOLI  | * P31068 | P39177 | flih_ecoli  | uspg_ecoli |
| P39177 | USPG_ECOLI  | * P0A9A6 | P39177 | ftsz_ecoli  | uspg_ecoli |
| P39177 | USPG_ECOLI  | * P68688 | P39177 | glrx1_ecoli | uspg_ecoli |
| P39177 | USPG_ECOLI  | * P0AET8 | P39177 | hdha_ecoli  | uspg_ecoli |
| P39177 | USPG_ECOLI  | * P0A6X3 | P39177 | hfq_ecoli   | uspg_ecoli |
| P39177 | USPG_ECOLI  | * P51020 | P39177 | hoa_ecoli   | uspg_ecoli |
| P39177 | USPG_ECOLI  | * P0C054 | P39177 | ibpa_ecoli  | uspg_ecoli |
| P39177 | USPG_ECOLI  | * P10441 | P39177 | lpxb_ecoli  | uspg_ecoli |
| P39177 | USPG_ECOLI  | * P0A9X4 | P39177 | mreb_ecoli  | uspg_ecoli |
| P39177 | USPG_ECOLI  | * P17443 | P39177 | murg_ecoli  | uspg_ecoli |
| P39177 | USPG_ECOLI  | * P75960 | P39177 | npd_ecoli   | uspg_ecoli |
| P39177 | USPG_ECOLI  | * P0AFC0 | P39177 | nudb_ecoli  | uspg_ecoli |
| P39177 | USPG_ECOLI  | * P18133 | P39177 | pncb_ecoli  | uspg_ecoli |



|        |            |   |        |        |            |            |
|--------|------------|---|--------|--------|------------|------------|
| P39177 | USPG_ECOLI | * | P31133 | P39177 | potf_ecoli | uspg_ecoli |
| P39177 | USPG_ECOLI | * | P0A7E1 | P39177 | pyrd_ecoli | uspg_ecoli |
| P39177 | USPG_ECOLI | * | P0A7E9 | P39177 | pyrh_ecoli | uspg_ecoli |
| P39177 | USPG_ECOLI | * | P69411 | P39177 | rscf_ecoli | uspg_ecoli |
| P39177 | USPG_ECOLI | * | P24173 | P39177 | rfac_ecoli | uspg_ecoli |
| P39177 | USPG_ECOLI | * | P37692 | P39177 | rfaf_ecoli | uspg_ecoli |
| P39177 | USPG_ECOLI | * | P0AG30 | P39177 | rho_ecoli  | uspg_ecoli |
| P39177 | USPG_ECOLI | * | P0AEI4 | P39177 | rimo_ecoli | uspg_ecoli |
| P39177 | USPG_ECOLI | * | P60422 | P39177 | rl2_ecoli  | uspg_ecoli |
| P39177 | USPG_ECOLI | * | P0AA39 | P39177 | rluc_ecoli | uspg_ecoli |
| P39177 | USPG_ECOLI | * | P0AFW4 | P39177 | rnk_ecoli  | uspg_ecoli |
| P39177 | USPG_ECOLI | * | P52108 | P39177 | rsta_ecoli | uspg_ecoli |
| P39177 | USPG_ECOLI | * | P0ACU2 | P39177 | rutr_ecoli | uspg_ecoli |
| P39177 | USPG_ECOLI | * | P09158 | P39177 | spee_ecoli | uspg_ecoli |
| P39177 | USPG_ECOLI | * | P80645 | P39177 | ssud_ecoli | uspg_ecoli |
| P39177 | USPG_ECOLI | * | P19934 | P39177 | tola_ecoli | uspg_ecoli |
| P39177 | USPG_ECOLI | * | P0ACT6 | P39177 | uidr_ecoli | uspg_ecoli |
| P39177 | USPG_ECOLI | * | P0A8E5 | P39177 | yacl_ecoli | uspg_ecoli |
| P39177 | USPG_ECOLI | * | P0A8E5 | P39177 | yacl_ecoli | uspg_ecoli |
| P39177 | USPG_ECOLI | * | P37008 | P39177 | yagb_ecoli | uspg_ecoli |
| P39177 | USPG_ECOLI | * | P31545 | P39177 | ycdb_ecoli | uspg_ecoli |
| P39177 | USPG_ECOLI | * | P0AB24 | P39177 | ycdo_ecoli | uspg_ecoli |
| P39177 | USPG_ECOLI | * | P75914 | P39177 | ycdx_ecoli | uspg_ecoli |
| P39177 | USPG_ECOLI | * | P75915 | P39177 | ycdy_ecoli | uspg_ecoli |
| P39177 | USPG_ECOLI | * | P52645 | P39177 | ydbh_ecoli | uspg_ecoli |
| P39177 | USPG_ECOLI | * | P0AD07 | P39177 | yecf_ecoli | uspg_ecoli |
| P39177 | USPG_ECOLI | * | P77196 | P39177 | yfcu_ecoli | uspg_ecoli |
| P39177 | USPG_ECOLI | * | P76569 | P39177 | yfgd_ecoli | uspg_ecoli |
|        |            |   |        |        |            |            |
| P43672 | UUP_ECOLI  | * | P0A705 | P43672 | if2_ecoli  | uup_ecoli  |
| P43672 | UUP_ECOLI  | * | P43671 | P43672 | pqib_ecoli | uup_ecoli  |
| P43672 | UUP_ECOLI  | * | P24211 | P43672 | rhse_ecoli | uup_ecoli  |
| P43672 | UUP_ECOLI  | * | P77552 | P43672 | ydhq_ecoli | uup_ecoli  |
| P43672 | UUP_ECOLI  | * | P0ADK6 | P43672 | yiba_ecoli | uup_ecoli  |
| P43672 | UUP_ECOLI  | * | P11290 | P43672 | yibd_ecoli | uup_ecoli  |
|        |            |   |        |        |            |            |
| P0A698 | UVRA_ECOLI | * | P77555 | P0A698 | alld_ecoli | uvra_ecoli |
| P0A698 | UVRA_ECOLI | * | P0A6E4 | P0A698 | assy_ecoli | uvra_ecoli |
| P0A698 | UVRA_ECOLI | * | P00864 | P0A698 | capp_ecoli | uvra_ecoli |
| P0A698 | UVRA_ECOLI | * | P07648 | P0A698 | ex5c_ecoli | uvra_ecoli |
| P0A698 | UVRA_ECOLI | * | P28905 | P0A698 | holc_ecoli | uvra_ecoli |
| P0A698 | UVRA_ECOLI | * | P0A749 | P0A698 | mura_ecoli | uvra_ecoli |
| P0A698 | UVRA_ECOLI | * | P0AFF6 | P0A698 | nusa_ecoli | uvra_ecoli |
| P0A698 | UVRA_ECOLI | * | P0A850 | P0A698 | tig_ecoli  | uvra_ecoli |

|        |            |          |        |              |            |
|--------|------------|----------|--------|--------------|------------|
| P0A8G0 | UVRC_ECOLI | * P37128 | P0A8G0 | nudk_ecoli   | uvrc_ecoli |
| P39160 | UXUB_ECOLI | * P0A6Y1 | P39160 | ihfb_ecoli   | uxub_ecoli |
| P25535 | VISC_ECOLI | * P00805 | P25535 | aspg2_ecoli  | visc_ecoli |
| P25535 | VISC_ECOLI | * P52061 | P25535 | rdgb_ecoli   | visc_ecoli |
| P25535 | VISC_ECOLI | * P77489 | P25535 | yagr_ecoli   | visc_ecoli |
| P0ACD2 | WCAF_ECOLI | * P04335 | P0ACD2 | frsa_ecoli   | wcaf_ecoli |
| P27828 | WECB_ECOLI | none     |        |              |            |
| P27829 | WECC_ECOLI | none     |        |              |            |
| P0A8G6 | WRBA_ECOLI | * P0A8N5 | P0A8G6 | syk2_ecoli   | wrba_ecoli |
| P0A8P8 | XERD_ECOLI | none     |        |              |            |
| P0A9M5 | XGPT_ECOLI | none     |        |              |            |
| P36879 | YADG_ECOLI | * P69910 | P36879 | dceb_ecoli   | yadg_ecoli |
| P36879 | YADG_ECOLI | * P16682 | P36879 | phnd_ecoli   | yadg_ecoli |
| P62768 | YAEH_ECOLI | none     |        |              |            |
| P0A940 | YAET_ECOLI | * P0AES0 | P0A940 | gsp_ecoli    | yaet_ecoli |
| P0A940 | YAET_ECOLI | * P0AEW6 | P0A940 | ingk_ecoli   | yaet_ecoli |
| P0A940 | YAET_ECOLI | * P0A903 | P0A940 | nlpb_ecoli   | yaet_ecoli |
| P30864 | YAFC_ECOLI | * P0AAF3 | P30864 | arag_ecoli   | yafc_ecoli |
| P30864 | YAFC_ECOLI | * P0A6J8 | P30864 | ddla_ecoli   | yafc_ecoli |
| P30864 | YAFC_ECOLI | * P69797 | P30864 | ptnab_ecoli  | yafc_ecoli |
| P30864 | YAFC_ECOLI | * P10907 | P30864 | ugpc_ecoli   | yafc_ecoli |
| P30864 | YAFC_ECOLI | * P71296 | P30864 | yagm_ecoli   | yafc_ecoli |
| P77300 | YAGI_ECOLI | none     |        |              |            |
| P77607 | YAGL_ECOLI | none     |        |              |            |
| P77802 | YAGX_ECOLI | * P0A9W0 | P77802 | ular_ecoli   | yagx_ecoli |
| P21514 | YAHA_ECOLI | none     |        |              |            |
| P75691 | YAHK_ECOLI | * P0A996 | P75691 | glpc_ecoli   | yahk_ecoli |
| P75691 | YAHK_ECOLI | * Q9F577 | P75691 | q9f577_ecolx | yahk_ecoli |

|        |            |          |        |             |            |
|--------|------------|----------|--------|-------------|------------|
| P51024 | YAIL_ECOLI | * P0AEM9 | P51024 | fliy_ecoli  | yail_ecoli |
| P0ADZ7 | YAJC_ECOLI | * P0ABY4 | P0ADZ7 | flaw_ecoli  | yajc_ecoli |
| P0ADZ7 | YAJC_ECOLI | * P0ADZ7 | P0ADZ7 | yajc_ecoli  | yajc_ecoli |
| P0A8E7 | YAJQ_ECOLI | * P0A9I5 | P0A8E7 | napd_ecoli  | yajq_ecoli |
| P0A8E7 | YAJQ_ECOLI | * P0A9I5 | P0A8E7 | napd_ecoli  | yajq_ecoli |
| P0A8E7 | YAJQ_ECOLI | * P0A776 | P0A8E7 | rpph_ecoli  | yajq_ecoli |
| P0A8E7 | YAJQ_ECOLI | * P0AA25 | P0A8E7 | thio_ecoli  | yajq_ecoli |
| P0A8E7 | YAJQ_ECOLI | * P0AA25 | P0A8E7 | thio_ecoli  | yajq_ecoli |
| P0A8E7 | YAJQ_ECOLI | * P0AAS7 | P0A8E7 | ybcj_ecoli  | yajq_ecoli |
| P77726 | YAJR_ECOLI | none     |        |             |            |
| P0A8B5 | YBAB_ECOLI | * P77624 | P0A8B5 | arcm_ecoli  | ybab_ecoli |
| P0A8B5 | YBAB_ECOLI | * P11557 | P0A8B5 | damx_ecoli  | ybab_ecoli |
| P0A8B5 | YBAB_ECOLI | * P0AEE8 | P0A8B5 | dma_ecoli   | ybab_ecoli |
| P0A8B5 | YBAB_ECOLI | * P0AC92 | P0A8B5 | gnsa_ecoli  | ybab_ecoli |
| P0A8B5 | YBAB_ECOLI | * P76141 | P0A8B5 | lsrr_ecoli  | ybab_ecoli |
| P77528 | YBCD_ECOLI | * Q46801 | P77528 | xdhc_ecoli  | ybcd_ecoli |
| P37325 | YBCH_ECOLI | none     |        |             |            |
| P77634 | YBCM_ECOLI | none     |        |             |            |
| P77460 | YBCY_ECOLI | none     |        |             |            |
| P0A8J4 | YBED_ECOLI | * P0CE47 | P0A8J4 | eftu1_ecoli | ybed_ecoli |
| P0A8J4 | YBED_ECOLI | * P0A9X4 | P0A8J4 | mreb_ecoli  | ybed_ecoli |
| P0A8J4 | YBED_ECOLI | * P0AA25 | P0A8J4 | thio_ecoli  | ybed_ecoli |
| P0A8J4 | YBED_ECOLI | * P0AA25 | P0A8J4 | thio_ecoli  | ybed_ecoli |
| P0AAU7 | YBFE_ECOLI | none     |        |             |            |
| P0A8Z3 | YBGC_ECOLI | * P0A6A8 | P0A8Z3 | acp_ecoli   | ybgc_ecoli |
| P0A8Z3 | YBGC_ECOLI | * P0A6A8 | P0A8Z3 | acp_ecoli   | ybgc_ecoli |
| P0A8Z3 | YBGC_ECOLI | * P0A6A8 | P0A8Z3 | acp_ecoli   | ybgc_ecoli |
| P0A8Z3 | YBGC_ECOLI | * P0A6A8 | P0A8Z3 | acp_ecoli   | ybgc_ecoli |
| P0A8Z3 | YBGC_ECOLI | * P0A6A8 | P0A8Z3 | acp_ecoli   | ybgc_ecoli |
| P0A8Z3 | YBGC_ECOLI | * P0A7A7 | P0A8Z3 | plsb_ecoli  | ybgc_ecoli |
| P0A8Z3 | YBGC_ECOLI | * P33643 | P0A8Z3 | rlud_ecoli  | ybgc_ecoli |
| P0AFP6 | YBGI_ECOLI | * P28629 | P0AFP6 | adia_ecoli  | ybgi_ecoli |

|        |            |          |        |                            |                            |
|--------|------------|----------|--------|----------------------------|----------------------------|
| P0AAV4 | YBGJ_ECOLI | * P0A6A8 | P0AAV4 | <a href="#">acp_ecoli</a>  | <a href="#">ybgj_ecoli</a> |
| P75745 | YBGK_ECOLI | * P0AG86 | P75745 | <a href="#">secb_ecoli</a> | <a href="#">ybgk_ecoli</a> |
| P0AAW9 | YBHT_ECOLI | none     |        |                            |                            |
| P30177 | YBIB_ECOLI | * P24224 | P30177 | <a href="#">acps_ecoli</a> | <a href="#">ybib_ecoli</a> |
| P30177 | YBIB_ECOLI | * P0AE78 | P30177 | <a href="#">corc_ecoli</a> | <a href="#">ybib_ecoli</a> |
| P30177 | YBIB_ECOLI | * P27296 | P30177 | <a href="#">ding_ecoli</a> | <a href="#">ybib_ecoli</a> |
| P30177 | YBIB_ECOLI | * P0A6W5 | P30177 | <a href="#">grea_ecoli</a> | <a href="#">ybib_ecoli</a> |
| P30177 | YBIB_ECOLI | * P0A705 | P30177 | <a href="#">if2_ecoli</a>  | <a href="#">ybib_ecoli</a> |
| P30177 | YBIB_ECOLI | * P30749 | P30177 | <a href="#">moae_ecoli</a> | <a href="#">ybib_ecoli</a> |
| P30177 | YBIB_ECOLI | * P52006 | P30177 | <a href="#">nudi_ecoli</a> | <a href="#">ybib_ecoli</a> |
| P30177 | YBIB_ECOLI | * P31992 | P30177 | <a href="#">ppta_ecoli</a> | <a href="#">ybib_ecoli</a> |
| P30177 | YBIB_ECOLI | * P0A884 | P30177 | <a href="#">tysy_ecoli</a> | <a href="#">ybib_ecoli</a> |
| P30177 | YBIB_ECOLI | * P42624 | P30177 | <a href="#">yhak_ecoli</a> | <a href="#">ybib_ecoli</a> |
| P0AAX8 | YBIS_ECOLI | none     |        |                            |                            |
| P75828 | YBJD_ECOLI | * P0A6M8 | P75828 | <a href="#">efg_ecoli</a>  | <a href="#">ybjd_ecoli</a> |
| P75828 | YBJD_ECOLI | * P27896 | P75828 | <a href="#">narq_ecoli</a> | <a href="#">ybjd_ecoli</a> |
| P75828 | YBJD_ECOLI | * P0AA39 | P75828 | <a href="#">rluc_ecoli</a> | <a href="#">ybjd_ecoli</a> |
| P0AAY6 | YBJN_ECOLI | none     |        |                            |                            |
| P0A8C1 | YBJQ_ECOLI | none     |        |                            |                            |
| P75829 | YBJX_ECOLI | * P67910 | P75829 | <a href="#">hldd_ecoli</a> | <a href="#">ybjx_ecoli</a> |
| P21367 | YCAC_ECOLI | none     |        |                            |                            |
| P75838 | YCAO_ECOLI | * P76503 | P75838 | <a href="#">fadi_ecoli</a> | <a href="#">ycao_ecoli</a> |
| P75838 | YCAO_ECOLI | * P33643 | P75838 | <a href="#">rlud_ecoli</a> | <a href="#">ycao_ecoli</a> |
| P75838 | YCAO_ECOLI | * P10408 | P75838 | <a href="#">seca_ecoli</a> | <a href="#">ycao_ecoli</a> |
| P75838 | YCAO_ECOLI | * P39177 | P75838 | <a href="#">uspg_ecoli</a> | <a href="#">ycao_ecoli</a> |
| P75838 | YCAO_ECOLI | * P37657 | P75838 | <a href="#">yhjs_ecoli</a> | <a href="#">ycao_ecoli</a> |
| P22525 | YCBB_ECOLI | * P0A6L2 | P22525 | <a href="#">dapa_ecoli</a> | <a href="#">ycbb_ecoli</a> |
| P22525 | YCBB_ECOLI | * P0A832 | P22525 | <a href="#">ssrp_ecoli</a> | <a href="#">ycbb_ecoli</a> |
| P22525 | YCBB_ECOLI | * P27242 | P22525 | <a href="#">waau_ecoli</a> | <a href="#">ycbb_ecoli</a> |
| P22525 | YCBB_ECOLI | * P37750 | P22525 | <a href="#">wbbj_ecoli</a> | <a href="#">ycbb_ecoli</a> |
| P22525 | YCBB_ECOLI | * P31449 | P22525 | <a href="#">yidl_ecoli</a> | <a href="#">ycbb_ecoli</a> |
| P22525 | YCBB_ECOLI | * P0A8H6 | P22525 | <a href="#">yihi_ecoli</a> | <a href="#">ycbb_ecoli</a> |
| P22525 | YCBB_ECOLI | * P76562 | P22525 | <a href="#">ypfi_ecoli</a> | <a href="#">ycbb_ecoli</a> |

|        |            |          |        |                            |                            |
|--------|------------|----------|--------|----------------------------|----------------------------|
| P0A8N0 | YCBG_ECOLI | * P0AE52 | P0A8N0 | <a href="#">bcp_ecoli</a>  | <a href="#">ycbg_ecoli</a> |
| P0A8N0 | YCBG_ECOLI | * P77609 | P0A8N0 | <a href="#">flxa_ecoli</a> | <a href="#">ycbg_ecoli</a> |
| P0A8N0 | YCBG_ECOLI | * P0AD21 | P0A8N0 | <a href="#">yejg_ecoli</a> | <a href="#">ycbg_ecoli</a> |
| P75849 | YCBL_ECOLI | none     |        |                            |                            |
| P75874 | YCCU_ECOLI | none     |        |                            |                            |
| P0AB28 | YCED_ECOLI | none     |        |                            |                            |
| P0A729 | YCEF_ECOLI | none     |        |                            |                            |
| P27431 | YCFD_ECOLI | none     |        |                            |                            |
| P0A8E1 | YCFP_ECOLI | none     |        |                            |                            |
| P75952 | YCFQ_ECOLI | none     |        |                            |                            |
| P75961 | YCFZ_ECOLI | * P0ACD4 | P75961 | <a href="#">nifu_ecoli</a> | <a href="#">ycfz_ecoli</a> |
| P29013 | YCGB_ECOLI | none     |        |                            |                            |
| P76000 | YCGI_ECOLI | none     |        |                            |                            |
| P37052 | YCHJ_ECOLI | none     |        |                            |                            |
| P0A8L7 | YCIU_ECOLI | none     |        |                            |                            |
| P76044 | YCJR_ECOLI | none     |        |                            |                            |
| P77154 | YCJT_ECOLI | * P19931 | P77154 | <a href="#">hyae_ecoli</a> | <a href="#">ycjt_ecoli</a> |
| P77615 | YCJW_ECOLI | * Q46899 | P77615 | <a href="#">ygcj_ecoli</a> | <a href="#">ycjw_ecoli</a> |
| P77333 | YCJZ_ECOLI | * P76558 | P77333 | <a href="#">mao2_ecoli</a> | <a href="#">ycjz_ecoli</a> |
| P77333 | YCJZ_ECOLI | * P75959 | P77333 | <a href="#">nagk_ecoli</a> | <a href="#">ycjz_ecoli</a> |
| P38394 | YDAE_ECOLI | * P36995 | P38394 | <a href="#">cspb_ecoli</a> | <a href="#">ydae_ecoli</a> |
| P76053 | YDAL_ECOLI | * P0A756 | P76053 | <a href="#">kefg_ecoli</a> | <a href="#">ydal_ecoli</a> |
| P76069 | YDAY_ECOLI | * P0A9X9 | P76069 | <a href="#">cspa_ecoli</a> | <a href="#">yday_ecoli</a> |
| P76069 | YDAY_ECOLI | * P0A9Y6 | P76069 | <a href="#">cspc_ecoli</a> | <a href="#">yday_ecoli</a> |
| P76069 | YDAY_ECOLI | * P33371 | P76069 | <a href="#">dusc_ecoli</a> | <a href="#">yday_ecoli</a> |

|        |            |   |        |        |                             |                            |
|--------|------------|---|--------|--------|-----------------------------|----------------------------|
| P76069 | YDAY_ECOLI | * | P67910 | P76069 | <a href="#">hldd_ecoli</a>  | <a href="#">yday_ecoli</a> |
| P76069 | YDAY_ECOLI | * | P08373 | P76069 | <a href="#">murb_ecoli</a>  | <a href="#">yday_ecoli</a> |
| P76069 | YDAY_ECOLI | * | P22188 | P76069 | <a href="#">mure_ecoli</a>  | <a href="#">yday_ecoli</a> |
| P76069 | YDAY_ECOLI | * | P0A8T1 | P76069 | <a href="#">prma_ecoli</a>  | <a href="#">yday_ecoli</a> |
| P76069 | YDAY_ECOLI | * | P0AB89 | P76069 | <a href="#">pur8_ecoli</a>  | <a href="#">yday_ecoli</a> |
| P76069 | YDAY_ECOLI | * | P0AG07 | P76069 | <a href="#">rpe_ecoli</a>   | <a href="#">yday_ecoli</a> |
| P76069 | YDAY_ECOLI | * | P39286 | P76069 | <a href="#">rsga_ecoli</a>  | <a href="#">yday_ecoli</a> |
| P76069 | YDAY_ECOLI | * | P0ABZ6 | P76069 | <a href="#">sura_ecoli</a>  | <a href="#">yday_ecoli</a> |
| P76069 | YDAY_ECOLI | * | P43672 | P76069 | <a href="#">uup_ecoli</a>   | <a href="#">yday_ecoli</a> |
| P76069 | YDAY_ECOLI | * | P0A8A2 | P76069 | <a href="#">yeen_ecoli</a>  | <a href="#">yday_ecoli</a> |
| P76076 | YDBL_ECOLI |   | none   |        |                             |                            |
| P0ACW6 | YDCH_ECOLI |   | none   |        |                             |                            |
| P76103 | YDCO_ECOLI |   | none   |        |                             |                            |
| P77730 | YDCR_ECOLI | * | P0A6Y8 | P77730 | <a href="#">dnak_ecoli</a>  | <a href="#">ydcr_ecoli</a> |
| P77730 | YDCR_ECOLI | * | P05041 | P77730 | <a href="#">pabb_ecoli</a>  | <a href="#">ydcr_ecoli</a> |
| P77156 | YDCU_ECOLI |   | none   |        |                             |                            |
| P31826 | YDDA_ECOLI |   | none   |        |                             |                            |
| P37757 | YDDE_ECOLI |   | none   |        |                             |                            |
| P39831 | YDFG_ECOLI | * | P76143 | P39831 | <a href="#">lsrf_ecoli</a>  | <a href="#">ydfg_ecoli</a> |
| P39831 | YDFG_ECOLI | * | P0AF10 | P39831 | <a href="#">mtlr_ecoli</a>  | <a href="#">ydfg_ecoli</a> |
| P64463 | YDFZ_ECOLI | * | P19930 | P64463 | <a href="#">hyad_ecoli</a>  | <a href="#">ydfz_ecoli</a> |
| P64463 | YDFZ_ECOLI | * | P64488 | P64463 | <a href="#">year_ecoli</a>  | <a href="#">ydfz_ecoli</a> |
| P76177 | YDGH_ECOLI | * | P30843 | P76177 | <a href="#">basr_ecoli</a>  | <a href="#">ydgh_ecoli</a> |
| P77552 | YDHQ_ECOLI | * | P0CE47 | P77552 | <a href="#">eftu1_ecoli</a> | <a href="#">ydhq_ecoli</a> |
| P0ACX3 | YDHR_ECOLI |   | none   |        |                             |                            |
| P76192 | YDHV_ECOLI |   | none   |        |                             |                            |
| P64476 | YDIH_ECOLI | * | P0A6G7 | P64476 | <a href="#">clpp_ecoli</a>  | <a href="#">ydih_ecoli</a> |
| P64476 | YDIH_ECOLI | * | P03007 | P64476 | <a href="#">dpo3e_ecoli</a> | <a href="#">ydih_ecoli</a> |
| P64476 | YDIH_ECOLI | * | P0A9X4 | P64476 | <a href="#">mreb_ecoli</a>  | <a href="#">ydih_ecoli</a> |
| P64476 | YDIH_ECOLI | * | P42641 | P64476 | <a href="#">obg_ecoli</a>   | <a href="#">ydih_ecoli</a> |



|        |            |          |        |            |            |
|--------|------------|----------|--------|------------|------------|
| P77748 | YDIJ_ECOLI | * P37313 | P77748 | dppf_ecoli | ydij_ecoli |
| P0ACY1 | YDJA_ECOLI | * P0AA25 | P0ACY1 | thio_ecoli | ydja_ecoli |
| P0ACY1 | YDJA_ECOLI | * P0AAR3 | P0ACY1 | ybak_ecoli | ydja_ecoli |
| P77721 | YDJF_ECOLI | * P77744 | P77721 | abgr_ecoli | ydjf_ecoli |
| P77721 | YDJF_ECOLI | * P68644 | P77721 | fixc_ecoli | ydjf_ecoli |
| P77721 | YDJF_ECOLI | * P0A6V8 | P77721 | glk_ecoli  | ydjf_ecoli |
| P39173 | YEAD_ECOLI | none     |        |            |            |
| P0ACY3 | YEAG_ECOLI | * P0ABQ4 | P0ACY3 | dyr_ecoli  | yeag_ecoli |
| P0ACY3 | YEAG_ECOLI | * P0A6M8 | P0ACY3 | efg_ecoli  | yeag_ecoli |
| P0ACY3 | YEAG_ECOLI | * P0A6W5 | P0ACY3 | grea_ecoli | yeag_ecoli |
| P64483 | YEAK_ECOLI | none     |        |            |            |
| P76254 | YEAX_ECOLI | none     |        |            |            |
| P76256 | YEAZ_ECOLI | * P05852 | P76256 | gcp_ecoli  | yeaz_ecoli |
| P0A8A0 | YEBE_ECOLI | * P0AEE5 | P0A8A0 | dgal_ecoli | yebc_ecoli |
| P76272 | YEBT_ECOLI | * P69922 | P76272 | fuci_ecoli | yebt_ecoli |
| P76272 | YEBT_ECOLI | * P23522 | P76272 | garl_ecoli | yebt_ecoli |
| P76272 | YEBT_ECOLI | * P22259 | P76272 | pcka_ecoli | yebt_ecoli |
| P76272 | YEBT_ECOLI | * P0A7E9 | P76272 | pyrh_ecoli | yebt_ecoli |
| P76272 | YEBT_ECOLI | * P77515 | P76272 | stfq_ecoli | yebt_ecoli |
| P64503 | YEBV_ECOLI | none     |        |            |            |
| P37774 | YECC_ECOLI | * P39346 | P37774 | idnd_ecoli | yecc_ecoli |
| P37774 | YECC_ECOLI | * P43672 | P37774 | uup_ecoli  | yecc_ecoli |
| P0ADI7 | YECD_ECOLI | none     |        |            |            |
| P31064 | YEDE_ECOLI | * P15770 | P31064 | aroe_ecoli | yede_ecoli |
| P76321 | YEDN_ECOLI | * P37590 | P76321 | pmrd_ecoli | yedn_ecoli |
| P76321 | YEDN_ECOLI | * P0A7S3 | P76321 | rs12_ecoli | yedn_ecoli |
| P76335 | YEDS_ECOLI | * P0A898 | P76335 | ybey_ecoli | yeds_ecoli |
| P0A8M6 | YEEX_ECOLI | * P36979 | P0A8M6 | rlmn_ecoli | yeex_ecoli |
| P0A8M6 | YEEX_ECOLI | * P00579 | P0A8M6 | rpod_ecoli | yeex_ecoli |
| P0A8M6 | YEEX_ECOLI | * P02358 | P0A8M6 | rs6_ecoli  | yeex_ecoli |

|        |            |          |        |             |            |
|--------|------------|----------|--------|-------------|------------|
| P0A8M6 | YEEX_ECOLI | * P0A832 | P0A8M6 | ssrp_ecoli  | yeex_ecoli |
| P37749 | YFEG_ECOLI | none     |        |             |            |
| P76393 | YEGI_ECOLI | none     |        |             |            |
| P33354 | YEHR_ECOLI | none     |        |             |            |
| P33355 | YEHS_ECOLI | none     |        |             |            |
| P76440 | YEIT_ECOLI | * P45523 | P76440 | fkba_ecoli  | yeit_ecoli |
| P76440 | YEIT_ECOLI | * P07012 | P76440 | rf2_ecoli   | yeit_ecoli |
| P76440 | YEIT_ECOLI | * P43672 | P76440 | uup_ecoli   | yeit_ecoli |
| P76440 | YEIT_ECOLI | * P0AC28 | P76440 | ygfa_ecoli  | yeit_ecoli |
| P33913 | YEJA_ECOLI | none     |        |             |            |
| P0AD24 | YEJL_ECOLI | none     |        |             |            |
| P17994 | YFAA_ECOLI | * P00957 | P17994 | sya_ecoli   | yfaa_ecoli |
| P0A8W8 | YFBU_ECOLI | * P0A6J1 | P0A8W8 | cysc_ecoli  | yfbu_ecoli |
| P0A8W8 | YFBU_ECOLI | * P0AEY3 | P0A8W8 | mazg_ecoli  | yfbu_ecoli |
| P0A8W8 | YFBU_ECOLI | * P04391 | P0A8W8 | otc1_ecoli  | yfbu_ecoli |
| P0A8W8 | YFBU_ECOLI | * P16690 | P0A8W8 | phnn_ecoli  | yfbu_ecoli |
| P0A8W8 | YFBU_ECOLI | * P23869 | P0A8W8 | ppib_ecoli  | yfbu_ecoli |
| P0A8W8 | YFBU_ECOLI | * P0AGB6 | P0A8W8 | rpoe_ecoli  | yfbu_ecoli |
| P0A8W8 | YFBU_ECOLI | * P11291 | P0A8W8 | y3808_ecoli | yfbu_ecoli |
| P0A8W8 | YFBU_ECOLI | * P0AD07 | P0A8W8 | yecf_ecoli  | yfbu_ecoli |
| P0A8W8 | YFBU_ECOLI | * P52140 | P0A8W8 | yfjy_ecoli  | yfbu_ecoli |
| P0AD30 | YFCA_ECOLI | * P16703 | P0AD30 | cysm_ecoli  | yfca_ecoli |
| P0AD30 | YFCA_ECOLI | * P26646 | P0AD30 | yhdh_ecoli  | yfca_ecoli |
| P39199 | YFCB_ECOLI | * P0A9K3 | P39199 | phol_ecoli  | yfcb_ecoli |
| P39199 | YFCB_ECOLI | * P33916 | P39199 | yejf_ecoli  | yfcb_ecoli |
| P67095 | YFCE_ECOLI | none     |        |             |            |
| P0AD33 | YFCZ_ECOLI | * P0A8N5 | P0AD33 | syk2_ecoli  | yfcz_ecoli |
| P76507 | YFDI_ECOLI | none     |        |             |            |
| P76549 | YFFR_ECOLI | none     |        |             |            |

|        |            |          |        |             |            |
|--------|------------|----------|--------|-------------|------------|
| P76550 | YFFS_ECOLI | none     |        |             |            |
| P76576 | YFGM_ECOLI | * P0A6G3 | P76576 | ygad_ecoli  | yfgm_ecoli |
| P37767 | YFHH_ECOLI | none     |        |             |            |
| P0AGJ5 | YFIF_ECOLI | * P0A6G7 | P0AGJ5 | clpp_ecoli  | yfif_ecoli |
| P0AGJ5 | YFIF_ECOLI | * P0A9Y6 | P0AGJ5 | cspc_ecoli  | yfif_ecoli |
| P0AGJ5 | YFIF_ECOLI | * P0A968 | P0AGJ5 | cspd_ecoli  | yfif_ecoli |
| P0AGJ5 | YFIF_ECOLI | * P0A9P6 | P0AGJ5 | dead_ecoli  | yfif_ecoli |
| P0AGJ5 | YFIF_ECOLI | * P0A9P6 | P0AGJ5 | dead_ecoli  | yfif_ecoli |
| P0AGJ5 | YFIF_ECOLI | * P03007 | P0AGJ5 | dpo3e_ecoli | yfif_ecoli |
| P0AGJ5 | YFIF_ECOLI | * P06710 | P0AGJ5 | dpo3x_ecoli | yfif_ecoli |
| P0AGJ5 | YFIF_ECOLI | * P0ABH0 | P0AGJ5 | ftsa_ecoli  | yfif_ecoli |
| P0AGJ5 | YFIF_ECOLI | * P0A6W5 | P0AGJ5 | grea_ecoli  | yfif_ecoli |
| P0AGJ5 | YFIF_ECOLI | * P0A6X3 | P0AGJ5 | hfq_ecoli   | yfif_ecoli |
| P0AGJ5 | YFIF_ECOLI | * P0ABS8 | P0AGJ5 | hole_ecoli  | yfif_ecoli |
| P0AGJ5 | YFIF_ECOLI | * P43329 | P0AGJ5 | hrpa_ecoli  | yfif_ecoli |
| P0AGJ5 | YFIF_ECOLI | * P0A707 | P0AGJ5 | if3_ecoli   | yfif_ecoli |
| P0AGJ5 | YFIF_ECOLI | * P0A715 | P0AGJ5 | kdsa_ecoli  | yfif_ecoli |
| P0AGJ5 | YFIF_ECOLI | * P21645 | P0AGJ5 | lpxd_ecoli  | yfif_ecoli |
| P0AGJ5 | YFIF_ECOLI | * P17443 | P0AGJ5 | murg_ecoli  | yfif_ecoli |
| P0AGJ5 | YFIF_ECOLI | * P0A9K3 | P0AGJ5 | phol_ecoli  | yfif_ecoli |
| P0AGJ5 | YFIF_ECOLI | * P0ABS5 | P0AGJ5 | prim_ecoli  | yfif_ecoli |
| P0AGJ5 | YFIF_ECOLI | * P42184 | P0AGJ5 | prsa_ecolx  | yfif_ecoli |
| P0AGJ5 | YFIF_ECOLI | * P23830 | P0AGJ5 | pss_ecoli   | yfif_ecoli |
| P0AGJ5 | YFIF_ECOLI | * P0A7E9 | P0AGJ5 | pyrh_ecoli  | yfif_ecoli |
| P0AGJ5 | YFIF_ECOLI | * P75864 | P0AGJ5 | rlml_ecoli  | yfif_ecoli |
| P0AGJ5 | YFIF_ECOLI | * P36979 | P0AGJ5 | rlmn_ecoli  | yfif_ecoli |
| P0AGJ5 | YFIF_ECOLI | * P36979 | P0AGJ5 | rlmn_ecoli  | yfif_ecoli |
| P0AGJ5 | YFIF_ECOLI | * P37765 | P0AGJ5 | rlub_ecoli  | yfif_ecoli |
| P0AGJ5 | YFIF_ECOLI | * P0AA39 | P0AGJ5 | rluc_ecoli  | yfif_ecoli |
| P0AGJ5 | YFIF_ECOLI | * P0AA39 | P0AGJ5 | rluc_ecoli  | yfif_ecoli |
| P0AGJ5 | YFIF_ECOLI | * P21513 | P0AGJ5 | rne_ecoli   | yfif_ecoli |
| P0AGJ5 | YFIF_ECOLI | * P0A7Y8 | P0AGJ5 | rnpa_ecoli  | yfif_ecoli |
| P0AGJ5 | YFIF_ECOLI | * P21499 | P0AGJ5 | rnrr_ecoli  | yfif_ecoli |
| P0AGJ5 | YFIF_ECOLI | * P0A776 | P0AGJ5 | rppe_ecoli  | yfif_ecoli |
| P0AGJ5 | YFIF_ECOLI | * P0A776 | P0AGJ5 | rppe_ecoli  | yfif_ecoli |
| P0AGJ5 | YFIF_ECOLI | * P14081 | P0AGJ5 | selb_ecoli  | yfif_ecoli |
| P0AGJ5 | YFIF_ECOLI | * P14081 | P0AGJ5 | selb_ecoli  | yfif_ecoli |
| P0AGJ5 | YFIF_ECOLI | * P15082 | P0AGJ5 | srlr_ecoli  | yfif_ecoli |
| P0AGJ5 | YFIF_ECOLI | * P28043 | P0AGJ5 | ssb2_ecolx  | yfif_ecoli |
| P0AGJ5 | YFIF_ECOLI | * P0A832 | P0AGJ5 | ssrp_ecoli  | yfif_ecoli |
| P0AGJ5 | YFIF_ECOLI | * P0A847 | P0AGJ5 | tgt_ecoli   | yfif_ecoli |
| P0AGJ5 | YFIF_ECOLI | * P0A847 | P0AGJ5 | tgt_ecoli   | yfif_ecoli |

|        |            |   |        |        |                            |                             |
|--------|------------|---|--------|--------|----------------------------|-----------------------------|
| P0AGJ5 | YFIF_ECOLI | * | P0A850 | P0AGJ5 | <a href="#">tig_ecoli</a>  | <a href="#">yfif_ecoli</a>  |
| P0AGJ5 | YFIF_ECOLI | * | P0A8I5 | P0AGJ5 | <a href="#">trmb_ecoli</a> | <a href="#">yfif_ecoli</a>  |
| P0AGJ5 | YFIF_ECOLI | * | P0A8G0 | P0AGJ5 | <a href="#">uvrc_ecoli</a> | <a href="#">yfif_ecoli</a>  |
| P0AGJ5 | YFIF_ECOLI | * | P0AAS7 | P0AGJ5 | <a href="#">ybcj_ecoli</a> | <a href="#">yfif_ecoli</a>  |
| P0AGJ5 | YFIF_ECOLI | * | P0AAS7 | P0AGJ5 | <a href="#">ybcj_ecoli</a> | <a href="#">yfif_ecoli</a>  |
| P0AGJ5 | YFIF_ECOLI | * | P0AGK4 | P0AGJ5 | <a href="#">yhby_ecoli</a> | <a href="#">yfif_ecoli</a>  |
| P0AGJ5 | YFIF_ECOLI | * | P0ADK8 | P0AGJ5 | <a href="#">yibl_ecoli</a> | <a href="#">yfif_ecoli</a>  |
| P0AC02 | YFIO_ECOLI | * | P0A903 | P0AC04 | <a href="#">nlpb_ecoli</a> | <a href="#">yfio_eco57</a>  |
| P0AC02 | YFIO_ECOLI | * | P76459 | P0AC02 | <a href="#">atoa_ecoli</a> | <a href="#">yfio_ecoli</a>  |
| Q47319 | YFIP_ECOLI | * | P0A850 | Q47319 | <a href="#">tig_ecoli</a>  | <a href="#">yfip_ecoli</a>  |
| P52124 | YFJI_ECOLI | * | P06611 | P52124 | <a href="#">btud_ecoli</a> | <a href="#">yfji_ecoli</a>  |
| P52124 | YFJI_ECOLI | * | P0AAG3 | P52124 | <a href="#">gltl_ecoli</a> | <a href="#">yfji_ecoli</a>  |
| P52131 | YFJP_ECOLI |   | none   |        |                            |                             |
| P52138 | YFJW_ECOLI | * | P33371 | P52138 | <a href="#">dusc_ecoli</a> | <a href="#">yfjw_ecoli</a>  |
| P52138 | YFJW_ECOLI | * | P0ADQ2 | P52138 | <a href="#">yiid_ecoli</a> | <a href="#">yfjw_ecoli</a>  |
| P0AD53 | YGAC_ECOLI | * | P0A953 | P0AD53 | <a href="#">fabb_ecoli</a> | <a href="#">ygac_ecoli</a>  |
| P0AD53 | YGAC_ECOLI | * | P29745 | P0AD53 | <a href="#">pept_ecoli</a> | <a href="#">ygac_ecoli</a>  |
| P0AD53 | YGAC_ECOLI | * | P0AG59 | P0AD53 | <a href="#">rs14_ecoli</a> | <a href="#">ygac_ecoli</a>  |
| P0AD53 | YGAC_ECOLI | * | P0A9V5 | P0AD53 | <a href="#">yiag_ecoli</a> | <a href="#">ygac_ecoli</a>  |
| P65807 | YGEY_ECOLI | * | P67826 | P65807 | <a href="#">cutc_ecoli</a> | <a href="#">ygey_ecoli</a>  |
| P65807 | YGEY_ECOLI | * | P0A6Q3 | P65807 | <a href="#">faba_ecoli</a> | <a href="#">ygey_ecoli</a>  |
| P65807 | YGEY_ECOLI | * | P30130 | P65807 | <a href="#">fimd_ecoli</a> | <a href="#">ygey_ecoli</a>  |
| P65807 | YGEY_ECOLI | * | P0AA43 | P65807 | <a href="#">rsua_ecoli</a> | <a href="#">ygey_ecoli</a>  |
| P65807 | YGEY_ECOLI | * | P76108 | P65807 | <a href="#">ydcs_ecoli</a> | <a href="#">ygey_ecoli</a>  |
| P65807 | YGEY_ECOLI | * | P77739 | P65807 | <a href="#">ynia_ecoli</a> | <a href="#">ygey_ecoli</a>  |
| P0A8C4 | YGFB_ECOLI |   | none   |        |                            |                             |
| Q46811 | YGFK_ECOLI | * | P69407 | Q46811 | <a href="#">rcsb_ecoli</a> | <a href="#">ygfk_ecoli</a>  |
| P0ADE8 | YGFZ_ECOLI | * | P0A705 | P0ADE8 | <a href="#">if2_ecoli</a>  | <a href="#">ygfz_ecoli</a>  |
| P0ADE8 | YGFZ_ECOLI | * | P08390 | P0ADE8 | <a href="#">usg_ecoli</a>  | <a href="#">ygfz_ecoli</a>  |
| P0AG84 | YGHA_ECOLI | * | P12008 | P0AG84 | <a href="#">aroc_ecoli</a> | <a href="#">ygaha_ecoli</a> |
| P0AG84 | YGHA_ECOLI | * | P46068 | P0AG84 | <a href="#">dsdc_ecoli</a> | <a href="#">ygaha_ecoli</a> |
| Q46841 | YGHQ_ECOLI | * | P07395 | Q46841 | <a href="#">syfb_ecoli</a> | <a href="#">yghq_ecoli</a>  |

|        |            |          |        |            |            |
|--------|------------|----------|--------|------------|------------|
| P0ADU2 | YGIN_ECOLI | * P0AD07 | P0ADU2 | yecf_ecoli | ygin_ecoli |
| Q46864 | YGIT_ECOLI | * P0A6J1 | Q46864 | cysc_ecoli | ygit_ecoli |
| Q46864 | YGIT_ECOLI | * P27296 | Q46864 | ding_ecoli | ygit_ecoli |
| Q46864 | YGIT_ECOLI | * P07658 | Q46864 | fdhf_ecoli | ygit_ecoli |
| Q46864 | YGIT_ECOLI | * P42641 | Q46864 | obg_ecoli  | ygit_ecoli |
| P0ADU5 | YGIW_ECOLI | * P0A8N5 | P0ADU5 | syk2_ecoli | ygiw_ecoli |
| P0ADU5 | YGIW_ECOLI | * P76170 | P0ADU5 | ynfb_ecoli | ygiw_ecoli |
| P63417 | YHBS_ECOLI | none     |        |            |            |
| P13518 | YHDA_ECOLI | none     |        |            |            |
| P25536 | YHDE_ECOLI | * P33022 | P25536 | rihb_ecoli | yhde_ecoli |
| P45766 | YHDW_ECOLI | none     |        |            |            |
| P64624 | YHEO_ECOLI | none     |        |            |            |
| P45524 | YHET_ECOLI | none     |        |            |            |
| P64627 | YHFL_ECOLI | none     |        |            |            |
| P46837 | YHGF_ECOLI | * P0A964 | P46837 | chew_ecoli | yhgf_ecoli |
| P46837 | YHGF_ECOLI | * P76291 | P46837 | cmob_ecoli | yhgf_ecoli |
| P46837 | YHGF_ECOLI | * P0AC55 | P46837 | glnk_ecoli | yhgf_ecoli |
| P46837 | YHGF_ECOLI | * P0A749 | P46837 | mura_ecoli | yhgf_ecoli |
| P46837 | YHGF_ECOLI | * P07118 | P46837 | syv_ecoli  | yhgf_ecoli |
| P46837 | YHGF_ECOLI | * P76104 | P46837 | ydcp_ecoli | yhgf_ecoli |
| P46837 | YHGF_ECOLI | * P52119 | P46837 | yfjf_ecoli | yhgf_ecoli |
| P37613 | YHHK_ECOLI | * P56259 | P37613 | yifn_ecoli | yhhk_ecoli |
| P37614 | YHHL_ECOLI | none     |        |            |            |
| P37624 | YHIH_ECOLI | * P76015 | P37624 | dhak_ecoli | yhih_ecoli |
| P68567 | YHIQ_ECOLI | none     |        |            |            |
| P37660 | YHJV_ECOLI | none     |        |            |            |
| P0A9V5 | YIAG_ECOLI | * P0A953 | P0A9V5 | fabb_ecoli | yiaq_ecoli |
| P0A9V5 | YIAG_ECOLI | * P0A8I1 | P0A9V5 | ruvx_ecoli | yiaq_ecoli |
| P0A9V5 | YIAG_ECOLI | * P0AAB4 | P0A9V5 | ubid_ecoli | yiaq_ecoli |

|        |            |          |        |             |            |
|--------|------------|----------|--------|-------------|------------|
| P0A9V5 | YIAG_ECOLI | * P33347 | P0A9V5 | yehk_ecoli  | yiag_ecoli |
| P37671 | YIAJ_ECOLI | none     |        |             |            |
| P0ADK6 | YIBA_ECOLI | * P0A6F5 | P0ADK6 | ch60_ecoli  | yiba_ecoli |
| P0ADK6 | YIBA_ECOLI | * P0A6Y8 | P0ADK6 | dnak_ecoli  | yiba_ecoli |
| P0ADK6 | YIBA_ECOLI | * P40874 | P0ADK6 | mtox_ecoli  | yiba_ecoli |
| P0ADK6 | YIBA_ECOLI | * P42184 | P0ADK6 | prsa_ecolx  | yiba_ecoli |
| P0ADK6 | YIBA_ECOLI | * P08390 | P0ADK6 | usg_ecoli   | yiba_ecoli |
| P0ACA1 | YIBF_ECOLI | none     |        |             |            |
| P0AFV0 | YIBH_ECOLI | none     |        |             |            |
| P0AG27 | YIBN_ECOLI | * P40719 | P0AG27 | qsec_ecoli  | yibn_ecoli |
| P0AG27 | YIBN_ECOLI | * P33225 | P0AG27 | tora_ecoli  | yibn_ecoli |
| P0AGE6 | YIEF_ECOLI | none     |        |             |            |
| P31471 | YIEL_ECOLI | none     |        |             |            |
| P32141 | YIHT_ECOLI | none     |        |             |            |
| P32162 | YIIS_ECOLI | * P24182 | P32162 | acc_c_ecoli | yiis_ecoli |
| P32162 | YIIS_ECOLI | * P0AFQ5 | P32162 | rutc_ecoli  | yiis_ecoli |
| P32677 | YIJO_ECOLI | none     |        |             |            |
| P0AF50 | YJBR_ECOLI | none     |        |             |            |
| P0ACU7 | YJDC_ECOLI | none     |        |             |            |
| P0AF67 | YJEE_ECOLI | * P63177 | P0AF67 | rlmb_ecoli  | yjee_ecoli |
| P0AF67 | YJEE_ECOLI | * P0A890 | P0AF67 | tusa_ecoli  | yjee_ecoli |
| P0AF67 | YJEE_ECOLI | * P31806 | P0AF67 | yjef_ecoli  | yjee_ecoli |
| P31806 | YJEF_ECOLI | * P15005 | P31806 | mcrb_ecoli  | yjef_ecoli |
| P31806 | YJEF_ECOLI | * P63177 | P31806 | rlmb_ecoli  | yjef_ecoli |
| P31806 | YJEF_ECOLI | * P0A8G0 | P31806 | uvrc_ecoli  | yjef_ecoli |
| P31806 | YJEF_ECOLI | * P0AF67 | P31806 | yjee_ecoli  | yjef_ecoli |
| P37772 | YJFF_ECOLI | * none   |        |             |            |
| P0AF90 | YJGD_ECOLI | * P33224 | P0AF90 | aidb_ecoli  | yjgd_ecoli |
| P0AF90 | YJGD_ECOLI | * P0A6G7 | P0AF90 | clpp_ecoli  | yjgd_ecoli |



|        |            |          |        |             |            |
|--------|------------|----------|--------|-------------|------------|
| P0AF90 | YJGD_ECOLI | * P06710 | P0AF90 | dpo3x_ecoli | yjgd_ecoli |
| P0AF90 | YJGD_ECOLI | * P0AEK4 | P0AF90 | fabj_ecoli  | yjgd_ecoli |
| P0AF90 | YJGD_ECOLI | * P0A9Z1 | P0AF90 | glnb_ecoli  | yjgd_ecoli |
| P0AF90 | YJGD_ECOLI | * P0A6Y1 | P0AF90 | ihfb_ecoli  | yjgd_ecoli |
| P0AF90 | YJGD_ECOLI | * P0A7A9 | P0AF90 | ipyr_ecoli  | yjgd_ecoli |
| P0AF90 | YJGD_ECOLI | * P0A9X4 | P0AF90 | mreb_ecoli  | yjgd_ecoli |
| P0AF93 | YJGF_ECOLI | none     |        |             |            |
| P0AF96 | YJGK_ECOLI | none     |        |             |            |
| P39353 | YJHC_ECOLI | * P30750 | P39353 | metn_ecoli  | yjhc_ecoli |
| P39356 | YJHU_ECOLI | none     |        |             |            |
| P24203 | YJIA_ECOLI | * P0AA25 | P24203 | thio_ecoli  | yjia_ecoli |
| P39376 | YJIE_ECOLI | * P0AG84 | P39376 | ygha_ecoli  | yjie_ecoli |
| P39384 | YJIM_ECOLI | none     |        |             |            |
| P37342 | YJJI_ECOLI | * P22106 | P37342 | asnb_ecoli  | yjji_ecoli |
| P37342 | YJJI_ECOLI | * P0AEE8 | P37342 | dma_ecoli   | yjji_ecoli |
| P0A9W3 | YJJK_ECOLI | * P0ABA4 | P0A9W3 | atpd_ecoli  | yjkk_ecoli |
| P0A9W3 | YJJK_ECOLI | * P33025 | P0A9W3 | psug_ecoli  | yjkk_ecoli |
| P0A9W3 | YJJK_ECOLI | * P0AGB6 | P0A9W3 | rpoe_ecoli  | yjkk_ecoli |
| P0A9W3 | YJJK_ECOLI | * P77300 | P0A9W3 | yagi_ecoli  | yjkk_ecoli |
| P0A9W3 | YJJK_ECOLI | * P77395 | P0A9W3 | ybbn_ecoli  | yjkk_ecoli |
| P0A9W3 | YJJK_ECOLI | * P77379 | P0A9W3 | ykgd_ecoli  | yjkk_ecoli |
| P39411 | YJXX_ECOLI | * none   |        |             |            |
| P75678 | YKFA_ECOLI | * P42624 | P75678 | yhak_ecoli  | ykfa_ecoli |
| P77252 | YKGE_ECOLI | none     |        |             |            |
| P75919 | YMDC_ECOLI | none     |        |             |            |
| P0AEB5 | YNAI_ECOLI | none     |        |             |            |
| P76116 | YNCE_ECOLI | * P23872 | P76116 | aes_ecoli   | ynce_ecoli |
| P76116 | YNCE_ECOLI | * P32099 | P76116 | lpla_ecoli  | ynce_ecoli |
| P76116 | YNCE_ECOLI | * P0AA39 | P76116 | rluc_ecoli  | ynce_ecoli |
| P76116 | YNCE_ECOLI | * P0AA39 | P76116 | rluc_ecoli  | ynce_ecoli |

|        |            |          |        |             |            |  |
|--------|------------|----------|--------|-------------|------------|--|
| P0AAJ1 | YNFG_ECOLI | none     |        |             |            |  |
| P0AEB7 | YOAB_ECOLI | none     |        |             |            |  |
| P64508 | YOBF_ECOLI | none     |        |             |            |  |
| Q2EES6 | YOHO_ECOLI | none     |        |             |            |  |
| P76561 | YPFH_ECOLI | none     |        |             |            |  |
| P10018 | YPR2_ECOLX | none     |        |             |            |  |
| P0A8W5 | YQGE_ECOLI | none     |        |             |            |  |
| Q46856 | YQHD_ECOLI | * P0AFP6 | Q46856 | ybgi_ecoli  | yqhd_ecoli |  |
| P77306 | YQIK_ECOLI | none     |        |             |            |  |
| P64581 | YQJD_ECOLI | * P0AEM9 | P64581 | fliy_ecoli  | yqjd_ecoli |  |
| P64588 | YQJI_ECOLI | * P76346 | P64588 | mtfa_ecoli  | yqji_ecoli |  |
| P64588 | YQJI_ECOLI | * P0A8E5 | P64588 | yacl_ecoli  | yqji_ecoli |  |
| P21314 | YR75_ECOLX | none     |        |             |            |  |
| P21324 | YR7J_ECOLX | none     |        |             |            |  |
| P0A9W9 | YRDA_ECOLI | none     |        |             |            |  |
| P45751 | YRFB_ECOLI | * P14900 | P45751 | murd_ecoli  | yrfb_ecoli |  |
| P45751 | YRFB_ECOLI | * P0AGG4 | P45751 | thio2_ecoli | yrfb_ecoli |  |
| P45751 | YRFB_ECOLI | * P0A8J4 | P45751 | ybed_ecoli  | yrfb_ecoli |  |
| P45751 | YRFB_ECOLI | * P76538 | P45751 | yfez_ecoli  | yrfb_ecoli |  |
| P64636 | YRFG_ECOLI | none     |        |             |            |  |
| P39187 | YTFJ_ECOLI | none     |        |             |            |  |
| P0ADE4 | YTFM_ECOLI | * P27249 | P0ADE4 | glnd_ecoli  | ytfm_ecoli |  |
| P0ADE4 | YTFM_ECOLI | * P23862 | P0ADE4 | pric_ecoli  | ytfm_ecoli |  |
| P0ADE4 | YTFM_ECOLI | * P39452 | P0ADE4 | rir3_ecoli  | ytfm_ecoli |  |
| P0ADE4 | YTFM_ECOLI | * P37680 | P0ADE4 | sgbe_ecoli  | ytfm_ecoli |  |
| P0ADE4 | YTFM_ECOLI | * P76100 | P0ADE4 | ydck_ecoli  | ytfm_ecoli |  |

|        |            |          |        |            |            |
|--------|------------|----------|--------|------------|------------|
| P39321 | YTFN_ECOLI | * Q93K97 | P39321 | adpp_ecoli | ytnf_ecoli |
| P39321 | YTFN_ECOLI | * P0A6V1 | P39321 | glgc_ecoli | ytnf_ecoli |
| P39321 | YTFN_ECOLI | * P22524 | P39321 | muke_ecoli | ytnf_ecoli |
| P39321 | YTFN_ECOLI | * P33136 | P39321 | opgg_ecoli | ytnf_ecoli |
| P39321 | YTFN_ECOLI | * P0A8P8 | P39321 | xerd_ecoli | ytnf_ecoli |
| P39321 | YTFN_ECOLI | * P0AFP4 | P39321 | ydbo_ecoli | ytnf_ecoli |
|        |            |          |        |            |            |
| P0AE48 | YTFP_ECOLI | none     |        |            |            |
|        |            |          |        |            |            |
| Q6BEX0 | YTFR_ECOLI | none     |        |            |            |
|        |            |          |        |            |            |
| P34211 | YUAR_ECOLI | none     |        |            |            |
|        |            |          |        |            |            |
| Q9S4X2 | YUBD_ECOLI | none     |        |            |            |
|        |            |          |        |            |            |
| Q9S4W2 | YUBM_ECOLI | * P0AG24 | Q9S4W2 | spot_ecoli | yubm_ecoli |
|        |            |          |        |            |            |
| P0ADS2 | ZAPA_ECOLI | * P77277 | P0ADS2 | eutj_ecoli | zapa_ecoli |
| P0ADS2 | ZAPA_ECOLI | * P0AFP6 | P0ADS2 | ybgi_ecoli | zapa_ecoli |
| P0ADS2 | ZAPA_ECOLI | * P33666 | P0ADS2 | ydba_ecoli | zapa_ecoli |
|        |            |          |        |            |            |
| Q1JQN5 | ZAPA_ECOLD |          |        |            |            |
|        |            |          |        |            |            |
| P0AF36 | ZAPB_ECOLI | * P32162 | P0AF36 | yiis_ecoli | zapb_ecoli |
|        |            |          |        |            |            |
| P39832 | ZNUB_ECOLI | none     |        |            |            |

| Alias interactor A | Alias interactor B | Interaction detection method |
|--------------------|--------------------|------------------------------|
| ycdX               | gnd                | pull down                    |
| yefI               | gnd                | pull down                    |
| argR               | aspC               | pull down                    |
| gyrA               | aspC               | pull down                    |
| prpE               | aspC               | pull down                    |
| accC               | accA               | pull down                    |
| accD               | accA               | pull down                    |
| accD               | accA               | pull down                    |
| acpP               | accA               | pull down                    |
| cspA               | accA               | pull down                    |
| cspC               | accA               | pull down                    |
| cspC               | accA               | pull down                    |
| cspD               | accA               | pull down                    |
| deaD               | accA               | pull down                    |
| fabA               | accA               | pull down                    |
| hinT               | accA               | pull down                    |
| hslV               | accA               | pull down                    |
| mreB               | accA               | pull down                    |
| nadA               | accA               | pull down                    |
| ppiC               | accA               | pull down                    |
| ravA               | accA               | pull down                    |
| rluC               | accA               | pull down                    |
| rpoD               | accA               | pull down                    |
| uvrD               | accA               | pull down                    |
| accB               | accC               | pull down                    |
| holA               | accC               | pull down                    |
| hslU               | accC               | pull down                    |
| hslV               | accC               | pull down                    |
| ppiB               | accC               | pull down                    |
| ravA               | accC               | pull down                    |
| ribD               | accC               | pull down                    |
| tusA               | aceA               | pull down                    |
| dsbA               | acnA               | pull down                    |

|      |      |                              |
|------|------|------------------------------|
| lpxA | acnA | pull down                    |
| stfQ | acnA | pull down                    |
| msbB | acnB | pull down                    |
| nfuA | acnB | pull down                    |
| nudK | acnB | pull down                    |
| puuB | acnB | pull down                    |
| relA | acnB | pull down                    |
| speD | acnB | pull down                    |
| aspS | acnB | pull down                    |
| trxA | acnB | tandem affinity purification |
| trxA | acnB | tandem affinity purification |
| trxA | acnB | tandem affinity purification |
| torZ | acnB | pull down                    |
| trpE | acnB | pull down                    |
| deaD | acpP | pull down                    |
| fabF | acpP | pull down                    |
| mukB | acpP | pull down                    |
| spoT | acpP | pull down                    |
| xerD | acpP | pull down                    |
| ybgC | acpP | tandem affinity purification |
| yhbJ | acpP | pull down                    |
| yiiD | acpP | pull down                    |
| dnaJ | add  | pull down                    |
| ftsZ | add  | pull down                    |
| gyrA | add  | pull down                    |
| ibpA | add  | pull down                    |
| ibpB | add  | pull down                    |
| mreB | add  | pull down                    |
| rcaA | add  | pull down                    |
| trxA | add  | tandem affinity purification |
| dxs  | adhE | pull down                    |
| greA | adhE | pull down                    |
| relA | adhE | pull down                    |
| ribF | adhE | pull down                    |
| ruvB | adhE | pull down                    |
| ffh  | adhE | pull down                    |
| lysU | adhE | pull down                    |

|      |      |           |
|------|------|-----------|
| ycgV | adhE | pull down |
| ackA | ahpC | pull down |
| yahl | ahpC | pull down |
| clpX | ahpC | pull down |
| fdhD | ahpC | pull down |
| fre  | ahpC | pull down |
| gpsA | ahpC | pull down |
| hisD | ahpC | pull down |
| hofQ | ahpC | pull down |
| hscA | ahpC | pull down |
| hyi  | ahpC | pull down |
| iraP | ahpC | pull down |
| lptA | ahpC | pull down |
| lyx  | ahpC | pull down |
| mtfA | ahpC | pull down |
| nadD | ahpC | pull down |
| nudG | ahpC | pull down |
| nudK | ahpC | pull down |
| pdxB | ahpC | pull down |
| queF | ahpC | pull down |
| ybaA | ahpC | pull down |
| ybiH | ahpC | pull down |
| ygaD | ahpC | pull down |
| yihI | ahpC | pull down |
| yihT | ahpC | pull down |
| thrA | ahpF | pull down |
| alsE | ahpF | pull down |
| appY | ahpF | pull down |
| carB | ahpF | pull down |
| envY | ahpF | pull down |
| msbB | ahpF | pull down |
| argI | ahpF | pull down |
| argF | ahpF | pull down |
| puuB | ahpF | pull down |
| rraA | ahpF | pull down |
| tyrR | ahpF | pull down |
| uspG | ahpF | pull down |
| uvrY | ahpF | pull down |
| yagJ | ahpF | pull down |
| yagK | ahpF | pull down |
| ydfG | ahpF | pull down |



|      |      |                                                   |
|------|------|---------------------------------------------------|
| yedK | ahpF | pull down                                         |
| ymdB | ahpF | pull down                                         |
| acpP | aidB | pull down                                         |
| acpP | aidB | pull down                                         |
| cbpA | aidB | pull down                                         |
| cspC | aidB | pull down                                         |
| cspC | aidB | pull down                                         |
| fldA | aidB | pull down                                         |
| hfq  | aidB | pull down                                         |
| queC | aidB | pull down                                         |
| rluB | aidB | pull down                                         |
| rluC | aidB | pull down                                         |
| smpB | aidB | pull down                                         |
| ybcJ | aidB | pull down                                         |
| cspB | thrA | pull down                                         |
| dnaB | thrA | pull down                                         |
| hslU | thrA | pull down                                         |
| tig  | thrA | pull down                                         |
| gpmA | fbaA | comigration in non denaturing gel electrophoresis |
| trxA | fbaA | tandem affinity purification                      |
| obgE | fbaB | pull down                                         |
| intA | eda  | pull down                                         |
| cheA | allC | pull down                                         |
| envY | allC | pull down                                         |
| fdrA | allC | pull down                                         |
| moaE | allR | pull down                                         |
| ileS | allR | pull down                                         |
| mntR | amiA | pull down                                         |
| narY | amiA | pull down                                         |
| pdxJ | amiA | pull down                                         |
| rhaS | amiA | pull down                                         |
| rpsA | amiA | pull down                                         |
| rpsO | amiA | pull down                                         |

|      |      |           |
|------|------|-----------|
| ydcS | amiA | pull down |
| ftsN | amiC | pull down |
| -    | amiC | pull down |
| cobT | amn  | pull down |
| dcm  | amn  | pull down |
| frdA | pepA | pull down |
| argI | pepA | pull down |
| <br> |      |           |
| pIdA | map  | pull down |
| leuS | map  | pull down |
| trpS | map  | pull down |
| <br> |      |           |
| fadJ | pepN | pull down |
| narY | pepN | pull down |
| rpmC | pepN | pull down |
| uvrD | pepN | pull down |
| <br> |      |           |
| ddlA | apt  | pull down |
| fusA | apt  | pull down |
| <br> |      |           |
| <br> |      |           |
| fusA | aroB | pull down |
| ihfB | aroB | pull down |
| <br> |      |           |
| yeaZ | aroK | pull down |
| <br> |      |           |
| galF | arpB | pull down |

|      |      |                                                   |
|------|------|---------------------------------------------------|
| fabB | arsB | pull down                                         |
| hemH | asnA | pull down                                         |
| lolB | asnA | pull down                                         |
| aldA | ansB | comigration in non denaturing gel electrophoresis |
| lolB | ansB | pull down                                         |
| tsf  | asr  | pull down                                         |
| atpD | atpA | blue native page                                  |
| atpD | atpA | pull down                                         |
| atpH | atpA | pull down                                         |
| atpG | atpA | pull down                                         |
| atpG | atpA | pull down                                         |
| nagD | atpA | pull down                                         |
| trxA | atpA | tandem affinity purification                      |
| uspG | atpA | pull down                                         |
| yaiA | atpA | pull down                                         |
| ybcH | atpA | pull down                                         |
| atpA | atpD | blue native page                                  |
| atpA | atpD | pull down                                         |
| atpA | atpD | comigration in non denaturing gel electrophoresis |
| atpA | atpD | comigration in non denaturing gel electrophoresis |
| atpA | atpD | blue native page                                  |
| atpH | atpD | pull down                                         |
| atpG | atpD | pull down                                         |
| cheW | atpD | pull down                                         |
| cheZ | atpD | pull down                                         |
| dnaJ | atpD | pull down                                         |
| fre  | atpD | pull down                                         |
| galF | atpD | pull down                                         |
| greA | atpD | pull down                                         |
| helD | atpD | pull down                                         |
| ibpA | atpD | pull down                                         |
| mreB | atpD | pull down                                         |
| agaB | atpD | pull down                                         |
| ribB | atpD | pull down                                         |
| rpoB | atpD | pull down                                         |
| trxA | atpD | tandem affinity purification                      |
| trxA | atpD | tandem affinity purification                      |
| ycgL | atpD | pull down                                         |

|      |      |                  |
|------|------|------------------|
| yecJ | atpD | pull down        |
| yeeN | atpD | pull down        |
| yojI | atpD | pull down        |
| atpA | atpF | blue native page |
| yggF | atpF | pull down        |
| atpA | atpG | blue native page |
| atpA | atpG | blue native page |
| cspA | atpG | pull down        |
| dcp  | atpG | pull down        |
| hemG | atpG | pull down        |
| hemK | atpG | pull down        |
| hinT | atpG | pull down        |
| metR | atpG | pull down        |
| atpA | atpE | blue native page |
| tusE | atpE | pull down        |
| yhbY | zntA | pull down        |
| mutS | baeS | pull down        |
| rihA | baeS | pull down        |
| yegD | baeS | pull down        |
| lsrK | bcsB | pull down        |
| alaS | bcsB | pull down        |
| serS | bcsB | pull down        |
| yfaS | bcsB | pull down        |
| betI | betB | pull down        |
| intA | ebgA | pull down        |
| argA | bglA | pull down        |
| deaD | bglA | pull down        |
| gcvT | bglA | pull down        |

|      |      |                       |
|------|------|-----------------------|
| lysS | bioA | pull down             |
| secA | bioB | pull down             |
| prmA | bioH | pull down             |
| obgE | btuE | pull down             |
| rnhB | btuE | pull down             |
| pyrH | cadB | pull down             |
| rarA | cadB | pull down             |
| appY | caiB | pull down             |
| astA | caiB | pull down             |
| coaD | caiB | pull down             |
| fixC | caiB | pull down             |
| iaaA | caiB | pull down             |
| ybiY | caiB | pull down             |
| sprT | caiB | pull down             |
| dsbA | katE | pull down             |
| lysU | katE | pull down             |
| argD | cbpA | blue native page      |
| lpxD | cbpA | pull down             |
| lpxD | cbpA | pull down             |
| tig  | cbpA | pull down             |
| ftsE | cdd  | pull down             |
| galF | cdh  | pull down             |
| btuB | ceaC | x-ray crystallography |

|     |     |                       |
|-----|-----|-----------------------|
| cdi | cda | x-ray crystallography |
| cdi | cda | x-ray crystallography |

|      |      |                              |
|------|------|------------------------------|
| dcd  | groS | pull down                    |
| trxA | groS | tandem affinity purification |

|      |      |           |
|------|------|-----------|
| aas  | groL | pull down |
| abgB | groL | pull down |
| abgR | groL | pull down |
| accA | groL | pull down |
| aceK | groL | pull down |
| acpH | groL | pull down |
| acpS | groL | pull down |
| adiY | groL | pull down |
| aer  | groL | pull down |
| aes  | groL | pull down |
| agal | groL | pull down |
| aidB | groL | pull down |
| aidB | groL | pull down |
| alkB | groL | pull down |
| eda  | groL | pull down |
| allD | groL | pull down |
| allS | groL | pull down |
| alsA | groL | pull down |
| amn  | groL | pull down |
| pepN | groL | pull down |
| anmK | groL | pull down |
| araC | groL | pull down |
| yahl | groL | pull down |
| argA | groL | pull down |
| argK | groL | pull down |
| arnA | groL | pull down |
| arnD | groL | pull down |
| aroB | groL | pull down |
| aroH | groL | pull down |
| arpA | groL | pull down |
| artP | groL | pull down |
| ascB | groL | pull down |
| astA | groL | pull down |
| astB | groL | pull down |
| astC | groL | pull down |



|      |      |           |
|------|------|-----------|
| astE | groL | pull down |
| atoD | groL | pull down |
| betA | groL | pull down |
| bglB | groL | pull down |
| bioA | groL | pull down |
| bioC | groL | pull down |
| bioD | groL | pull down |
| bioF | groL | pull down |
| bioH | groL | pull down |
| btuD | groL | pull down |
| btuE | groL | pull down |
| ybdK | groL | pull down |
| caiD | groL | pull down |
| can  | groL | pull down |
| carB | groL | pull down |
| katE | groL | pull down |
| cbpA | groL | pull down |
| chbG | groL | pull down |
| chbR | groL | pull down |
| cheR | groL | pull down |
| cho  | groL | pull down |
| cho  | groL | pull down |
| gltA | groL | pull down |
| citC | groL | pull down |
| citX | groL | pull down |
| clpP | groL | pull down |
| clpP | groL | pull down |
| clpP | groL | pull down |
| coaA | groL | pull down |
| cobC | groL | pull down |
| cobT | groL | pull down |
| cof  | groL | pull down |
| copA | groL | pull down |
| csdA | groL | pull down |
| cusR | groL | pull down |
| cyoA | groL | pull down |
| cysA | groL | pull down |
| cysD | groL | pull down |
| cysH | groL | pull down |
| dapE | groL | pull down |
| dbpA | groL | pull down |
| gadA | groL | pull down |
| gadB | groL | pull down |
| ldcC | groL | pull down |
| dcm  | groL | pull down |

|      |      |           |
|------|------|-----------|
| dctR | groL | pull down |
| ddg  | groL | pull down |
| ddpD | groL | pull down |
| ddpF | groL | pull down |
| dgoK | groL | pull down |
| dgt  | groL | pull down |
| gcd  | groL | pull down |
| sdhB | groL | pull down |
| djIC | groL | pull down |
| dId  | groL | pull down |
| dam  | groL | pull down |
| dmlA | groL | pull down |
| dmlR | groL | pull down |
| dnaA | groL | pull down |
| dpiB | groL | pull down |
| dppF | groL | pull down |
| dsdC | groL | pull down |
| dusB | groL | pull down |
| dusC | groL | pull down |
| dxr  | groL | pull down |
| ebgC | groL | pull down |
| entB | groL | pull down |
| entC | groL | pull down |
| entF | groL | pull down |
| envY | groL | pull down |
| eutB | groL | pull down |
| eutG | groL | pull down |
| eutR | groL | pull down |
| fadI | groL | pull down |
| fbpC | groL | pull down |
| fcl  | groL | pull down |
| fdhD | groL | pull down |
| fdhF | groL | pull down |
| fdnH | groL | pull down |
| feaR | groL | pull down |
| fecE | groL | pull down |
| fecR | groL | pull down |
| fepB | groL | pull down |
| fepC | groL | pull down |
| fes  | groL | pull down |
| fhIA | groL | pull down |
| fimD | groL | pull down |
| fixB | groL | pull down |
| fixC | groL | pull down |
| fliH | groL | pull down |

|      |      |           |
|------|------|-----------|
| fliI | groL | pull down |
| fliM | groL | pull down |
| fliY | groL | pull down |
| fliZ | groL | pull down |
| folD | groL | pull down |
| frlD | groL | pull down |
| frsA | groL | pull down |
| fruR | groL | pull down |
| frvR | groL | pull down |
| ftsE | groL | pull down |
| ftsE | groL | pull down |
| ftsE | groL | pull down |
| fucK | groL | pull down |
| gabD | groL | pull down |
| gadW | groL | pull down |
| gadX | groL | pull down |
| galF | groL | pull down |
| galS | groL | pull down |
| gatD | groL | pull down |
| gatR | groL | pull down |
| gatZ | groL | pull down |
| gcl  | groL | pull down |
| gcp  | groL | pull down |
| gcvA | groL | pull down |
| glcC | groL | pull down |
| glf  | groL | pull down |
| glgA | groL | pull down |
| glgB | groL | pull down |
| glgX | groL | pull down |
| glnD | groL | pull down |
| glpA | groL | pull down |
| glpC | groL | pull down |
| glpD | groL | pull down |
| glvG | groL | pull down |
| gmr  | groL | pull down |
| gspA | groL | pull down |
| gudD | groL | pull down |
| gudX | groL | pull down |
| hcaB | groL | pull down |
| hcaD | groL | pull down |
| hcaE | groL | pull down |
| hcaR | groL | pull down |
| hdhA | groL | pull down |
| helD | groL | pull down |
| helD | groL | pull down |

|      |      |           |
|------|------|-----------|
| hemG | groL | pull down |
| hisP | groL | pull down |
| hldD | groL | pull down |
| hmp  | groL | pull down |
| mhpE | groL | pull down |
| hofB | groL | pull down |
| holA | groL | pull down |
| folK | groL | pull down |
| htrB | groL | pull down |
| htrE | groL | pull down |
| hybA | groL | pull down |
| hybE | groL | pull down |
| hycE | groL | pull down |
| hycG | groL | pull down |
| hydN | groL | pull down |
| hyfG | groL | pull down |
| hyfG | groL | pull down |
| hyfG | groL | pull down |
| hyfR | groL | pull down |
| hypD | groL | pull down |
| hypD | groL | pull down |
| icc  | groL | pull down |
| iciA | groL | pull down |
| idnR | groL | pull down |
| inaA | groL | pull down |
| intB | groL | pull down |
| intQ | groL | pull down |
| ppa  | groL | pull down |
| ispH | groL | pull down |
| kbl  | groL | pull down |
| kdsA | groL | pull down |
| kdsA | groL | pull down |
| kdul | groL | pull down |
| kefF | groL | pull down |
| kefG | groL | pull down |
| thrB | groL | pull down |
| kil  | groL | pull down |
| prkB | groL | pull down |
| prs  | groL | pull down |
| fadD | groL | pull down |
| ldcA | groL | pull down |
| cadA | groL | pull down |
| leuO | groL | pull down |
| aat  | groL | pull down |
| gloA | groL | pull down |

|      |      |           |
|------|------|-----------|
| lipA | groL | pull down |
| livF | groL | pull down |
| livG | groL | pull down |
| lldD | groL | pull down |
| lpxB | groL | pull down |
| lpxC | groL | pull down |
| lpxH | groL | pull down |
| lsrA | groL | pull down |
| lsrF | groL | pull down |
| lsrK | groL | pull down |
| lsrR | groL | pull down |
| mak  | groL | pull down |
| mall | groL | pull down |
| malT | groL | pull down |
| malZ | groL | pull down |
| matC | groL | pull down |
| mazG | groL | pull down |
| mdaB | groL | pull down |
| meiR | groL | pull down |
| menF | groL | pull down |
| metA | groL | pull down |
| metC | groL | pull down |
| metF | groL | pull down |
| metK | groL | pull down |
| mgIA | groL | pull down |
| mhpB | groL | pull down |
| mhpC | groL | pull down |
| miaA | groL | pull down |
| miaB | groL | pull down |
| mIaA | groL | pull down |
| mIaF | groL | pull down |
| mIaF | groL | pull down |
| mIaF | groL | pull down |
| mIra | groL | pull down |
| mngB | groL | pull down |
| moaA | groL | pull down |
| moaA | groL | pull down |
| moaA | groL | pull down |
| modC | groL | pull down |
| modF | groL | pull down |
| yehH | groL | pull down |
| mpaA | groL | pull down |
| mqsR | groL | pull down |
| mraZ | groL | pull down |
| mreB | groL | pull down |

|      |      |           |
|------|------|-----------|
| mreB | groL | pull down |
| msbB | groL | pull down |
| mug  | groL | pull down |
| mutY | groL | pull down |
| nadD | groL | pull down |
| nagC | groL | pull down |
| nagD | groL | pull down |
| napD | groL | pull down |
| narQ | groL | pull down |
| narZ | groL | pull down |
| nfi  | groL | pull down |
| nfrA | groL | pull down |
| nhaR | groL | pull down |
| nhoA | groL | pull down |
| nikD | groL | pull down |
| nikE | groL | pull down |
| nrdG | groL | pull down |
| nrfC | groL | pull down |
| nudL | groL | pull down |
| nuoF | groL | pull down |
| ogt  | groL | pull down |
| ompL | groL | pull down |
| oppF | groL | pull down |
| paaX | groL | pull down |
| pabA | groL | pull down |
| panE | groL | pull down |
| pbpC | groL | pull down |
| pdhR | groL | pull down |
| perR | groL | pull down |
| pfIC | groL | pull down |
| phnC | groL | pull down |
| phnL | groL | pull down |
| phnN | groL | pull down |
| php  | groL | pull down |
| phrB | groL | pull down |
| hyuA | groL | pull down |
| plsB | groL | pull down |
| pmbA | groL | pull down |
| pncB | groL | pull down |
| potA | groL | pull down |
| ppk  | groL | pull down |
| ppnK | groL | pull down |
| pptA | groL | pull down |
| prpB | groL | pull down |
| prpD | groL | pull down |



|      |      |           |
|------|------|-----------|
| prpE | groL | pull down |
| prpR | groL | pull down |
| pstB | groL | pull down |
| pstB | groL | pull down |
| pstB | groL | pull down |
| psuG | groL | pull down |
| psuK | groL | pull down |
| pth  | groL | pull down |
| cmtA | groL | pull down |
| ptrB | groL | pull down |
| purU | groL | pull down |
| putA | groL | pull down |
| puuB | groL | pull down |
| pyrD | groL | pull down |
| pyrH | groL | pull down |
| radA | groL | pull down |
| rbsR | groL | pull down |
| rcaA | groL | pull down |
| rdoA | groL | pull down |
| recF | groL | pull down |
| recF | groL | pull down |
| recF | groL | pull down |
| rfaF | groL | pull down |
| rfaG | groL | pull down |
| rfaI | groL | pull down |
| rfaJ | groL | pull down |
| rfaP | groL | pull down |
| rfaQ | groL | pull down |
| rfaY | groL | pull down |
| rfaZ | groL | pull down |
| rffA | groL | pull down |
| rhaB | groL | pull down |
| rhaR | groL | pull down |
| rhaS | groL | pull down |
| rhmD | groL | pull down |
| rhmR | groL | pull down |
| rhcC | groL | pull down |
| rhcD | groL | pull down |
| rhcE | groL | pull down |
| rhcE | groL | pull down |
| ribD | groL | pull down |
| ribD | groL | pull down |
| ribF | groL | pull down |
| rimJ | groL | pull down |
| rimN | groL | pull down |

|      |      |           |
|------|------|-----------|
| rlmA | groL | pull down |
| rlmE | groL | pull down |
| rlmH | groL | pull down |
| rlmM | groL | pull down |
| rlmN | groL | pull down |
| rluD | groL | pull down |
| rfbC | groL | pull down |
| rfbC | groL | pull down |
| rfbD | groL | pull down |
| rnd  | groL | pull down |
| rpiR | groL | pull down |
| rppH | groL | pull down |
| rsgA | groL | pull down |
| rsmA | groL | pull down |
| rspA | groL | pull down |
| rstA | groL | pull down |
| rtcB | groL | pull down |
| rtcR | groL | pull down |
| rumB | groL | pull down |
| ruvB | groL | pull down |
| ruvB | groL | pull down |
| ruvB | groL | pull down |
| ruvC | groL | pull down |
| sapD | groL | pull down |
| sdiA | groL | pull down |
| selU | groL | pull down |
| serC | groL | pull down |
| sgbH | groL | pull down |
| sgcE | groL | pull down |
| sgcQ | groL | pull down |
| sgcR | groL | pull down |
| sgrR | groL | pull down |
| smtA | groL | pull down |
| speE | groL | pull down |
| sppA | groL | pull down |
| spr  | groL | pull down |
| srlD | groL | pull down |
| ssnA | groL | pull down |
| sspA | groL | pull down |
| ssuB | groL | pull down |
| ssuE | groL | pull down |
| ycjM | groL | pull down |
| sufC | groL | pull down |
| sufI | groL | pull down |
| sufS | groL | pull down |

|      |      |                                 |
|------|------|---------------------------------|
| leuS | groL | pull down                       |
| proS | groL | pull down                       |
| serS | groL | pull down                       |
| tadA | groL | pull down                       |
| tas  | groL | pull down                       |
| tauB | groL | pull down                       |
| tdcA | groL | pull down                       |
| tdh  | groL | pull down                       |
| tehB | groL | pull down                       |
| tgt  | groL | pull down                       |
| thiB | groL | pull down                       |
| thiD | groL | pull down                       |
| thiE | groL | pull down                       |
| thiF | groL | pull down                       |
| thiH | groL | pull down                       |
| thiK | groL | pull down                       |
| thiL | groL | pull down                       |
| thiM | groL | pull down                       |
| thiQ | groL | pull down                       |
| torA | groL | pull down                       |
| torZ | groL | pull down                       |
| treF | groL | pull down                       |
| trkA | groL | pull down                       |
| trmB | groL | pull down                       |
| trpC | groL | pull down                       |
| trpE | groL | pull down                       |
| ttcA | groL | pull down                       |
| ttdB | groL | pull down                       |
| ttdR | groL | pull down                       |
| tus  | groL | pull down                       |
| tyrB | groL | pull down                       |
| ubiB | groL | pull down                       |
| ubiF | groL | pull down                       |
| ubiG | groL | pull down                       |
| ubiH | groL | pull down                       |
| ubiX | groL | pull down                       |
| ugd  | groL | pull down                       |
| ulaE | groL | pull down                       |
| ulaR | groL | pull down                       |
| ulaR | groL | pull down                       |
| ulaR | groL | pull down                       |
| ung  | groL | pull down                       |
| uspG | groL | anti bait coimmunoprecipitation |
| uspG | groL | pull down                       |
| uspG | groL | pull down                       |

|      |      |           |
|------|------|-----------|
| uxaC | groL | pull down |
| waaU | groL | pull down |
| wbbJ | groL | pull down |
| wcaA | groL | pull down |
| wcaC | groL | pull down |
| wcaM | groL | pull down |
| xapA | groL | pull down |
| xapR | groL | pull down |
| yicl | groL | pull down |
| yaaA | groL | pull down |
| yadG | groL | pull down |
| yaeB | groL | pull down |
| yaeQ | groL | pull down |
| yaeR | groL | pull down |
| yafJ | groL | pull down |
| yafL | groL | pull down |
| yafM | groL | pull down |
| yafP | groL | pull down |
| yafZ | groL | pull down |
| yagA | groL | pull down |
| yagB | groL | pull down |
| yagE | groL | pull down |
| yagK | groL | pull down |
| yagM | groL | pull down |
| yagP | groL | pull down |
| yagQ | groL | pull down |
| yagS | groL | pull down |
| yagT | groL | pull down |
| yagW | groL | pull down |
| yahB | groL | pull down |
| yahE | groL | pull down |
| yahG | groL | pull down |
| yahL | groL | pull down |
| yaiV | groL | pull down |
| yajD | groL | pull down |
| yajO | groL | pull down |
| ybaP | groL | pull down |
| ybbC | groL | pull down |
| ybbL | groL | pull down |
| ybbL | groL | pull down |
| ybbO | groL | pull down |
| ybcH | groL | pull down |
| ybcM | groL | pull down |
| ybdG | groL | pull down |
| ybdH | groL | pull down |

|      |      |           |
|------|------|-----------|
| ybdL | groL | pull down |
| ybdN | groL | pull down |
| ybdO | groL | pull down |
| ybdR | groL | pull down |
| ybeF | groL | pull down |
| ybeL | groL | pull down |
| ybeR | groL | pull down |
| ybfF | groL | pull down |
| ybfL | groL | pull down |
| ybfO | groL | pull down |
| ybgA | groL | pull down |
| ybgJ | groL | pull down |
| ybgK | groL | pull down |
| ybgL | groL | pull down |
| ybgP | groL | pull down |
| ybhA | groL | pull down |
| ybhB | groL | pull down |
| ybhK | groL | pull down |
| ybhO | groL | pull down |
| ybhP | groL | pull down |
| ybiP | groL | pull down |
| ybiU | groL | pull down |
| ybjX | groL | pull down |
| ycaQ | groL | pull down |
| ycbJ | groL | pull down |
| ycbK | groL | pull down |
| ycdB | groL | pull down |
| yceA | groL | pull down |
| ycfH | groL | pull down |
| ycgB | groL | pull down |
| ycgF | groL | pull down |
| ycgR | groL | pull down |
| ychG | groL | pull down |
| ychJ | groL | pull down |
| ychO | groL | pull down |
| yciT | groL | pull down |
| ycjS | groL | pull down |
| ycjX | groL | pull down |
| ydaV | groL | pull down |
| ydcP | groL | pull down |
| ydcR | groL | pull down |
| ydcS | groL | pull down |
| yddH | groL | pull down |
| ydeH | groL | pull down |
| ydeM | groL | pull down |

|      |      |           |
|------|------|-----------|
| ydeU | groL | pull down |
| ydfG | groL | pull down |
| ydfH | groL | pull down |
| ydhB | groL | pull down |
| ydiA | groL | pull down |
| ydiF | groL | pull down |
| ydiU | groL | pull down |
| ydiV | groL | pull down |
| ydjG | groL | pull down |
| ydjJ | groL | pull down |
| yeaE | groL | pull down |
| yeaK | groL | pull down |
| yeaM | groL | pull down |
| yebR | groL | pull down |
| yecC | groL | pull down |
| yecE | groL | pull down |
| yedK | groL | pull down |
| yedL | groL | pull down |
| yedY | groL | pull down |
| yeeZ | groL | pull down |
| yefG | groL | pull down |
| yefI | groL | pull down |
| yegL | groL | pull down |
| yehQ | groL | pull down |
| yehX | groL | pull down |
| yeil | groL | pull down |
| yejA | groL | pull down |
| yejH | groL | pull down |
| yfaA | groL | pull down |
| yfaQ | groL | pull down |
| yfbQ | groL | pull down |
| yfcG | groL | pull down |
| yfcH | groL | pull down |
| yfcl | groL | pull down |
| yfdR | groL | pull down |
| yfdZ | groL | pull down |
| yfeZ | groL | pull down |
| yfhR | groL | pull down |
| yfiH | groL | pull down |
| yfiQ | groL | pull down |
| yfjK | groL | pull down |
| yfjN | groL | pull down |
| yfjQ | groL | pull down |
| yfjR | groL | pull down |
| yfjX | groL | pull down |



|      |      |           |
|------|------|-----------|
| yfjY | groL | pull down |
| ygaE | groL | pull down |
| ygaF | groL | pull down |
| ygaP | groL | pull down |
| ygbL | groL | pull down |
| ygbM | groL | pull down |
| ygbT | groL | pull down |
| ygcB | groL | pull down |
| ygcH | groL | pull down |
| ygcK | groL | pull down |
| ygcL | groL | pull down |
| ygcN | groL | pull down |
| ygcO | groL | pull down |
| ygdH | groL | pull down |
| ygeA | groL | pull down |
| ygeH | groL | pull down |
| ygeV | groL | pull down |
| ygfA | groL | pull down |
| ygfA | groL | pull down |
| ygfH | groL | pull down |
| ygfJ | groL | pull down |
| yggR | groL | pull down |
| yggW | groL | pull down |
| yghR | groL | pull down |
| yghT | groL | pull down |
| yghZ | groL | pull down |
| ygiD | groL | pull down |
| ygiR | groL | pull down |
| yhbJ | groL | pull down |
| yhbU | groL | pull down |
| yhbU | groL | pull down |
| yhbU | groL | pull down |
| yhbW | groL | pull down |
| yhcC | groL | pull down |
| yhcM | groL | pull down |
| yhdZ | groL | pull down |
| yheT | groL | pull down |
| yhiJ | groL | pull down |
| yhiL | groL | pull down |
| yhiN | groL | pull down |
| yhiR | groL | pull down |
| yhiR | groL | pull down |
| yhjB | groL | pull down |
| yhjH | groL | pull down |
| yaC  | groL | pull down |

|      |      |           |
|------|------|-----------|
| yibD | groL | pull down |
| yidA | groL | pull down |
| yidF | groL | pull down |
| yidL | groL | pull down |
| yidP | groL | pull down |
| yidZ | groL | pull down |
| yeE  | groL | pull down |
| yigA | groL | pull down |
| yihR | groL | pull down |
| poxA | groL | pull down |
| yjeE | groL | pull down |
| yjeK | groL | pull down |
| yjfZ | groL | pull down |
| yjgZ | groL | pull down |
| yjhl | groL | pull down |
| yjhP | groL | pull down |
| yjhR | groL | pull down |
| yjiC | groL | pull down |
| yjiE | groL | pull down |
| yjiR | groL | pull down |
| yjjJ | groL | pull down |
| yjjU | groL | pull down |
| ykfJ | groL | pull down |
| ykgD | groL | pull down |
| ykgF | groL | pull down |
| ylbA | groL | pull down |
| ylbE | groL | pull down |
| ylbF | groL | pull down |
| ymfD | groL | pull down |
| ynaA | groL | pull down |
| ynbC | groL | pull down |
| yncG | groL | pull down |
| yneJ | groL | pull down |
| yniA | groL | pull down |
| ynjA | groL | pull down |
| yoaA | groL | pull down |
| yobB | groL | pull down |
| yojl | groL | pull down |
| ypdB | groL | pull down |
| ypdC | groL | pull down |
| ypdF | groL | pull down |
| ypfl | groL | pull down |
| yphE | groL | pull down |
| yqaB | groL | pull down |
| yqiB | groL | pull down |

|      |      |           |
|------|------|-----------|
| yqjG | groL | pull down |
| ytfM | groL | pull down |
| znuC | groL | pull down |
| znuC | groL | pull down |

|      |      |           |
|------|------|-----------|
| aspA | chbF | pull down |
| fabG | chbF | pull down |
| moeB | chbF | pull down |
| yagK | chbF | pull down |

|      |      |           |
|------|------|-----------|
| cspB | gltA | pull down |
| yacl | gltA | pull down |
| ydcJ | gltA | pull down |
| ygaD | gltA | pull down |

|      |      |                       |
|------|------|-----------------------|
| cbpA | clpA | pull down             |
| clpP | clpA | pull down             |
| clpS | clpA | x-ray crystallography |
| clpS | clpA | x-ray crystallography |
| clpX | clpA | pull down             |
| ldcC | clpA | pull down             |
| dnaJ | clpA | pull down             |
| dxs  | clpA | pull down             |
| fabZ | clpA | pull down             |
| fldA | clpA | pull down             |
| gyrA | clpA | pull down             |
| holC | clpA | pull down             |
| hscC | clpA | pull down             |
| ibpA | clpA | pull down             |
| ibpA | clpA | pull down             |
| pyrH | clpA | pull down             |
| rplD | clpA | pull down             |
| rlmE | clpA | pull down             |
| rlmN | clpA | pull down             |
| rnpA | clpA | pull down             |
| rpoB | clpA | pull down             |
| ffh  | clpA | pull down             |
| sspB | clpA | pull down             |
| smpB | clpA | pull down             |
| ubiB | clpA | pull down             |
| uvrD | clpA | pull down             |
| yjeP | clpA | pull down             |

|      |      |           |
|------|------|-----------|
| allA | clpB | pull down |
| zntA | clpB | pull down |
| cbpA | clpB | pull down |
| groL | clpB | pull down |
| clpS | clpB | pull down |
| clpX | clpB | pull down |
| dut  | clpB | pull down |
| fxsA | clpB | pull down |
| garK | clpB | pull down |
| grpE | clpB | pull down |
| hscB | clpB | pull down |
| ibpA | clpB | pull down |
| intB | clpB | pull down |
| manB | clpB | pull down |
| mreB | clpB | pull down |
| msbB | clpB | pull down |
| pbpC | clpB | pull down |
| queF | clpB | pull down |
| rfaP | clpB | pull down |
| rfaY | clpB | pull down |
| rlmN | clpB | pull down |
| rpoH | clpB | pull down |
| rpoC | clpB | pull down |
| ruvB | clpB | pull down |
| smp  | clpB | pull down |
| sspB | clpB | pull down |
| sbp  | clpB | pull down |
| lysU | clpB | pull down |
| ybdG | clpB | pull down |
| yddH | clpB | pull down |
| yfaL | clpB | pull down |
| yibD | clpB | pull down |
| ykgF | clpB | pull down |

|      |      |           |
|------|------|-----------|
| fdhE | cmoA | pull down |
| ydjA | cmoA | pull down |

|      |      |           |
|------|------|-----------|
| murG | cpdB | pull down |
| ybaK | cpdB | pull down |

|      |     |           |
|------|-----|-----------|
| oxaA | crp | pull down |
| rcsB | crp | pull down |
| ubiB | crp | pull down |

|      |      |                                                   |
|------|------|---------------------------------------------------|
| yacl | crp  | pull down                                         |
| cspD | cspC | pull down                                         |
| cspD | cspC | pull down                                         |
| deaD | cspC | pull down                                         |
| dnaQ | cspC | pull down                                         |
| hfq  | cspC | pull down                                         |
| rpoA | cspC | pull down                                         |
| lysU | cspC | pull down                                         |
| uvrC | cspC | pull down                                         |
| yhbJ | cspC | pull down                                         |
| yahl | cspD | pull down                                         |
| cspC | cspD | pull down                                         |
| grxD | csrA | pull down                                         |
| helD | csrA | pull down                                         |
| hfq  | csrA | pull down                                         |
| appC | cydA | blue native page                                  |
| bcp  | cysB | pull down                                         |
| rpoB | cysB | pull down                                         |
| tpx  | cysB | pull down                                         |
| dmsB | cysH | pull down                                         |
| rnhB | cysH | pull down                                         |
| ygbT | cysH | pull down                                         |
| holB | cysJ | pull down                                         |
| ycbX | cysJ | pull down                                         |
| ycbX | cysJ | pull down                                         |
| cysA | cysK | pull down                                         |
| cysE | cysK | comigration in non denaturing gel electrophoresis |
| rpiR | cysK | pull down                                         |
| sufC | cysK | pull down                                         |
| lysU | cysK | pull down                                         |

|      |      |                                                   |
|------|------|---------------------------------------------------|
| argR | cysP | pull down                                         |
| ycgC | cysP | pull down                                         |
| sufI | cysP | pull down                                         |
| grxD | cysQ | pull down                                         |
| paaB | cysQ | pull down                                         |
| rpmA | cysQ | pull down                                         |
| rpoC | cysQ | pull down                                         |
| truD | cysQ | pull down                                         |
| yraN | cysQ | pull down                                         |
| cheW | dacA | pull down                                         |
| cheZ | dacA | pull down                                         |
| yfaY | dacA | pull down                                         |
| deaD | dacA | pull down                                         |
| infC | dacA | pull down                                         |
| rhlB | dacA | pull down                                         |
| ydbH | dacA | pull down                                         |
| yfiF | dacA | pull down                                         |
| lpxH | dacC | pull down                                         |
| atpA | dadA | comigration in non denaturing gel electrophoresis |
| atpA | dadA | comigration in non denaturing gel electrophoresis |
| cheW | dadA | pull down                                         |
| cheZ | dadA | pull down                                         |
| cyoA | dadA | pull down                                         |
| fepB | dadA | pull down                                         |
| fepC | dadA | pull down                                         |
| hemH | dadA | pull down                                         |
| ppa  | dadA | pull down                                         |
| lpxB | dadA | pull down                                         |
| lpxH | dadA | pull down                                         |
| moaD | dadA | pull down                                         |
| murG | dadA | pull down                                         |
| otsB | dadA | pull down                                         |
| ppiB | dadA | pull down                                         |
| rfaC | dadA | pull down                                         |
| tig  | dadA | pull down                                         |
| uspG | dadA | pull down                                         |
| ybbO | dadA | pull down                                         |
| yecA | dadA | pull down                                         |
| yeeN | dadA | pull down                                         |
| yidB | dadA | pull down                                         |



|       |      |                              |
|-------|------|------------------------------|
| fdhD  | dapA | pull down                    |
| prkB  | dapB | pull down                    |
| trxA  | dapD | tandem affinity purification |
| trxA  | dapD | tandem affinity purification |
| yahA  | dapD | pull down                    |
| yegS  | dapD | pull down                    |
| csdA  | dapE | pull down                    |
| hemX  | dapE | pull down                    |
| rlmN  | dapF | pull down                    |
| rppH  | dapF | pull down                    |
| rppH  | dapF | pull down                    |
| allR  | hupA | pull down                    |
| cspA  | hupA | pull down                    |
| cspC  | hupA | blue native page             |
| cspC  | hupA | pull down                    |
| cspD  | hupA | pull down                    |
| cspE  | hupA | pull down                    |
| hupB  | hupA | pull down                    |
| deaD  | hupA | pull down                    |
| polA  | hupA | pull down                    |
| dusC  | hupA | pull down                    |
| fabA  | hupA | pull down                    |
| fis   | hupA | pull down                    |
| hfq   | hupA | pull down                    |
| hfq   | hupA | pull down                    |
| hns   | hupA | pull down                    |
| ihfB  | hupA | pull down                    |
| intA  | hupA | pull down                    |
| kdsA  | hupA | pull down                    |
| mnmeE | hupA | pull down                    |
| murG  | hupA | pull down                    |
| nfi   | hupA | pull down                    |
| ybeZ  | hupA | pull down                    |
| malP  | hupA | pull down                    |
| pnp   | hupA | pull down                    |
| pyrH  | hupA | pull down                    |
| rcaA  | hupA | pull down                    |
| prfB  | hupA | pull down                    |
| ribD  | hupA | pull down                    |
| rlmN  | hupA | pull down                    |

|      |      |           |
|------|------|-----------|
| rluB | hupA | pull down |
| rluC | hupA | pull down |
| rnhA | hupA | pull down |
| rnpA | hupA | pull down |
| rnr  | hupA | pull down |
| rpoA | hupA | pull down |
| rpoB | hupA | pull down |
| rpoB | hupA | pull down |
| rpoC | hupA | pull down |
| rppH | hupA | pull down |
| slyD | hupA | pull down |
| spoT | hupA | pull down |
| srlR | hupA | pull down |
| ssb  | hupA | pull down |
| smpB | hupA | pull down |
| hsdS | hupA | pull down |
| tgt  | hupA | pull down |
| topA | hupA | pull down |
| topB | hupA | pull down |
| uvrB | hupA | pull down |
| uvrC | hupA | pull down |
| uvrD | hupA | pull down |
| ybaZ | hupA | pull down |
| ybcJ | hupA | pull down |
| ybjX | hupA | pull down |
| yfiF | hupA | pull down |
| yjdl | hupA | pull down |

|      |      |           |
|------|------|-----------|
| acpP | hupB | pull down |
| cspA | hupB | pull down |
| cspC | hupB | pull down |
| hupA | hupB | pull down |
| deaD | hupB | pull down |
| polA | hupB | pull down |
| nei  | hupB | pull down |
| hfq  | hupB | pull down |
| infC | hupB | pull down |
| ihfB | hupB | pull down |
| kdsB | hupB | pull down |
| nfi  | hupB | pull down |
| pyrH | hupB | pull down |
| prfB | hupB | pull down |
| rluC | hupB | pull down |
| slyD | hupB | pull down |
| srlR | hupB | pull down |

|      |      |                              |
|------|------|------------------------------|
| smpB | hupB | pull down                    |
| hsdS | hupB | pull down                    |
| tgt  | hupB | pull down                    |
| trxA | hupB | tandem affinity purification |
| topA | hupB | pull down                    |
| ulaR | hupB | pull down                    |
| uvrB | hupB | pull down                    |
| uvrD | hupB | pull down                    |
| ybcJ | hupB | pull down                    |
| ybjX | hupB | pull down                    |
| yfiQ | hupB | pull down                    |
| yraN | hupB | pull down                    |

|      |      |           |
|------|------|-----------|
| gadB | gadA | pull down |
| gadB | gadA | pull down |
| dnaK | gadA | pull down |
| grpE | gadA | pull down |
| ibpA | gadA | pull down |
| lysU | gadA | pull down |
| yach | gadA | pull down |

|      |      |           |
|------|------|-----------|
| gadA | gadB | pull down |
| gadA | gadB | pull down |
| gadA | gadB | pull down |
| dnaK | gadB | pull down |
| grpE | gadB | pull down |
| helD | gadB | pull down |
| ibpB | gadB | pull down |
| lysU | gadB | pull down |
| yiiD | gadB | pull down |
| yjeE | gadB | pull down |

|      |     |           |
|------|-----|-----------|
| citG | dcm | pull down |
| mnmE | dcm | pull down |
| aceF | dcm | pull down |

|      |     |           |
|------|-----|-----------|
| lsrK | dcp | pull down |
|------|-----|-----------|

|      |      |           |
|------|------|-----------|
| cspD | ddlA | pull down |
|------|------|-----------|

|     |      |           |
|-----|------|-----------|
| map | deaD | pull down |
|-----|------|-----------|

|       |      |                                    |
|-------|------|------------------------------------|
| cbpA  | deaD | pull down                          |
| cspA  | deaD | pull down                          |
| cspC  | deaD | pull down                          |
| cspC  | deaD | pull down                          |
| cspD  | deaD | pull down                          |
| dnaJ  | deaD | pull down                          |
| dps   | deaD | pull down                          |
| fabA  | deaD | pull down                          |
| gyrB  | deaD | pull down                          |
| hfq   | deaD | pull down                          |
| hslV  | deaD | pull down                          |
| nusG  | deaD | pull down                          |
| ybeZ  | deaD | pull down                          |
| rplD  | deaD | pull down                          |
| rlmN  | deaD | pull down                          |
| rluC  | deaD | pull down                          |
| rne   | deaD | pull down                          |
| rne   | deaD | affinity chromatography technology |
| rnpA  | deaD | pull down                          |
| rnr   | deaD | pull down                          |
| rppH  | deaD | pull down                          |
| spoT  | deaD | pull down                          |
| tgt   | deaD | pull down                          |
| trmB  | deaD | pull down                          |
| ybaB  | deaD | pull down                          |
| ybcJ  | deaD | pull down                          |
| yfiF  | deaD | pull down                          |
| ackA  | def  | pull down                          |
| yahI  | def  | pull down                          |
| rmlA1 | def  | pull down                          |
| cysS  | def  | pull down                          |
| yebC  | def  | pull down                          |
| yihT  | def  | pull down                          |
| clpP  | degP | pull down                          |
| mgIA  | degP | pull down                          |
| purE  | degP | pull down                          |
| pyrH  | degP | pull down                          |
| recT  | degP | pull down                          |
| yagR  | deoB | pull down                          |
| acs   | deoC | pull down                          |
| eutQ  | deoC | pull down                          |

|      |      |           |
|------|------|-----------|
| fpr  | deoC | pull down |
| yeaR | deoC | pull down |
| yidL | deoC | pull down |

|      |      |           |
|------|------|-----------|
| pykF | deoD | pull down |
|------|------|-----------|

|      |      |           |
|------|------|-----------|
| parE | dhaK | pull down |
| ybeB | dhaK | pull down |

|      |     |           |
|------|-----|-----------|
| cdh  | ndh | pull down |
| entF | ndh | pull down |
| oxaA | ndh | pull down |

|      |      |           |
|------|------|-----------|
| bglG | folP | pull down |
|------|------|-----------|

|      |      |           |
|------|------|-----------|
| aceK | sdhA | pull down |
| allA | sdhA | pull down |
| allR | sdhA | pull down |
| allS | sdhA | pull down |
| arnA | sdhA | pull down |
| speG | sdhA | pull down |
| caiA | sdhA | pull down |
| caiB | sdhA | pull down |
| caiD | sdhA | pull down |
| caiF | sdhA | pull down |
| cirA | sdhA | pull down |
| clpB | sdhA | pull down |
| clpX | sdhA | pull down |
| cobC | sdhA | pull down |
| copA | sdhA | pull down |
| cysI | sdhA | pull down |
| hupB | sdhA | pull down |
| dcuS | sdhA | pull down |
| dld  | sdhA | pull down |
| polB | sdhA | pull down |
| folA | sdhA | pull down |
| feaR | sdhA | pull down |
| fixC | sdhA | pull down |
| fkpB | sdhA | pull down |

|      |      |                              |
|------|------|------------------------------|
| fliF | sdhA | pull down                    |
| fumC | sdhA | pull down                    |
| gcl  | sdhA | pull down                    |
| glxR | sdhA | pull down                    |
| gmr  | sdhA | pull down                    |
| hemH | sdhA | pull down                    |
| hscC | sdhA | pull down                    |
| hyfR | sdhA | pull down                    |
| kdsA | sdhA | pull down                    |
| kdsB | sdhA | pull down                    |
| kefF | sdhA | pull down                    |
| fadD | sdhA | pull down                    |
| lpxB | sdhA | pull down                    |
| lpxD | sdhA | pull down                    |
| trg  | sdhA | pull down                    |
| miaB | sdhA | pull down                    |
| mngB | sdhA | pull down                    |
| mqo  | sdhA | pull down                    |
| narJ | sdhA | pull down                    |
| narQ | sdhA | pull down                    |
| aceF | sdhA | pull down                    |
| paaG | sdhA | pull down                    |
| panE | sdhA | pull down                    |
| pfID | sdhA | pull down                    |
| ppk  | sdhA | pull down                    |
| recR | sdhA | pull down                    |
| recT | sdhA | pull down                    |
| rimO | sdhA | pull down                    |
| rnhB | sdhA | pull down                    |
| rpoB | sdhA | pull down                    |
| rpoC | sdhA | pull down                    |
| rpsB | sdhA | pull down                    |
| rtcR | sdhA | pull down                    |
| stfQ | sdhA | pull down                    |
| sucC | sdhA | pull down                    |
| sucD | sdhA | pull down                    |
| ycjM | sdhA | pull down                    |
| argS | sdhA | pull down                    |
| tyrS | sdhA | pull down                    |
| tesC | sdhA | pull down                    |
| trxA | sdhA | tandem affinity purification |
| tig  | sdhA | pull down                    |
| tig  | sdhA | pull down                    |
| uspG | sdhA | pull down                    |
| yajD | sdhA | pull down                    |

|      |      |           |
|------|------|-----------|
| ybaK | sdhA | pull down |
| ybaP | sdhA | pull down |
| ybbC | sdhA | pull down |
| ybdR | sdhA | pull down |
| ybeL | sdhA | pull down |
| ycjF | sdhA | pull down |
| ycjW | sdhA | pull down |
| ydaV | sdhA | pull down |
| ydcP | sdhA | pull down |
| ydfI | sdhA | pull down |
| ydgA | sdhA | pull down |
| ydhW | sdhA | pull down |
| yfaA | sdhA | pull down |
| yfaQ | sdhA | pull down |
| yfiQ | sdhA | pull down |
| yfjL | sdhA | pull down |
| ygeV | sdhA | pull down |
| yphE | sdhA | pull down |

|      |      |                              |
|------|------|------------------------------|
| trxA | dksA | tandem affinity purification |
|------|------|------------------------------|

|      |      |           |
|------|------|-----------|
| acpP | lpdA | pull down |
| acpP | lpdA | pull down |
| cheY | lpdA | pull down |
| cspB | lpdA | pull down |
| cspB | lpdA | pull down |
| dam  | lpdA | pull down |
| dam  | lpdA | pull down |
| dnaA | lpdA | pull down |
| polA | lpdA | pull down |
| polA | lpdA | pull down |
| dnaE | lpdA | pull down |
| dusC | lpdA | pull down |
| nth  | lpdA | pull down |
| nfo  | lpdA | pull down |
| nei  | lpdA | pull down |
| xthA | lpdA | pull down |
| recD | lpdA | pull down |
| recB | lpdA | pull down |
| fadI | lpdA | pull down |
| fadJ | lpdA | pull down |



|       |      |           |
|-------|------|-----------|
| fdhD  | lpdA | pull down |
| fucU  | lpdA | pull down |
| gyrA  | lpdA | pull down |
| hrpA  | lpdA | pull down |
| hrpB  | lpdA | pull down |
| hrpB  | lpdA | pull down |
| hycl  | lpdA | pull down |
| ibpA  | lpdA | pull down |
| ibpB  | lpdA | pull down |
| idnD  | lpdA | pull down |
| ilvB  | lpdA | pull down |
| ilvB  | lpdA | pull down |
| intS  | lpdA | pull down |
| cadA  | lpdA | pull down |
| mnmeE | lpdA | pull down |
| napA  | lpdA | pull down |
| narJ  | lpdA | pull down |
| nfi   | lpdA | pull down |
| nudB  | lpdA | pull down |
| sucA  | lpdA | pull down |
| sucA  | lpdA | pull down |
| sucB  | lpdA | pull down |
| aceF  | lpdA | pull down |
| ogt   | lpdA | pull down |
| ogt   | lpdA | pull down |
| paaX  | lpdA | pull down |
| paaX  | lpdA | pull down |
| parC  | lpdA | pull down |
| pdhR  | lpdA | pull down |
| ybeZ  | lpdA | pull down |
| ybeZ  | lpdA | pull down |
| malP  | lpdA | pull down |
| malP  | lpdA | pull down |
| pinR  | lpdA | pull down |
| plsB  | lpdA | pull down |
| ppk   | lpdA | pull down |
| yadB  | lpdA | pull down |
| ravA  | lpdA | pull down |
| recJ  | lpdA | pull down |
| recJ  | lpdA | pull down |
| recQ  | lpdA | pull down |
| recQ  | lpdA | pull down |
| rlmN  | lpdA | pull down |
| rluC  | lpdA | pull down |
| rluC  | lpdA | pull down |

|      |      |           |
|------|------|-----------|
| rnhA | lpdA | pull down |
| rnpA | lpdA | pull down |
| rsmG | lpdA | pull down |
| surA | lpdA | pull down |
| hsdR | lpdA | pull down |
| hsdR | lpdA | pull down |
| hsdS | lpdA | pull down |
| trxC | lpdA | pull down |
| topA | lpdA | pull down |
| topB | lpdA | pull down |
| topB | lpdA | pull down |
| trmB | lpdA | pull down |
| ubiE | lpdA | pull down |
| ulaR | lpdA | pull down |
| uvrB | lpdA | pull down |
| uvrB | lpdA | pull down |
| uvrC | lpdA | pull down |
| uvrC | lpdA | pull down |
| uvrD | lpdA | pull down |
| uvrD | lpdA | pull down |
| uvrY | lpdA | pull down |
| ybaK | lpdA | pull down |
| ybcJ | lpdA | pull down |
| ybhK | lpdA | pull down |
| ybhK | lpdA | pull down |
| ybjX | lpdA | pull down |
| yceA | lpdA | pull down |
| ycgE | lpdA | pull down |
| ycgF | lpdA | pull down |
| ycgF | lpdA | pull down |
| ydaM | lpdA | pull down |
| ydjF | lpdA | pull down |
| yejF | lpdA | pull down |
| yfiQ | lpdA | pull down |
| ygeV | lpdA | pull down |
| ygfF | lpdA | pull down |
| yhbU | lpdA | pull down |
| yicC | lpdA | pull down |
| yjeF | lpdA | pull down |
| yjeF | lpdA | pull down |
| yjgD | lpdA | pull down |
| ynfB | lpdA | pull down |
| yraN | lpdA | pull down |
| znuC | lpdA | pull down |

|      |      |           |
|------|------|-----------|
| icc  | dam  | pull down |
| fbaB | dnaJ | pull down |
| argR | dnaJ | pull down |
| btuE | dnaJ | pull down |
| cheW | dnaJ | pull down |
| cspC | dnaJ | pull down |
| cyoA | dnaJ | pull down |
| deaD | dnaJ | pull down |
| dinD | dnaJ | pull down |
| dnaA | dnaJ | pull down |
| dnaA | dnaJ | pull down |
| tufA | dnaJ | pull down |
| eutJ | dnaJ | pull down |
| recD | dnaJ | pull down |
| fkpB | dnaJ | pull down |
| ftsA | dnaJ | pull down |
| glmS | dnaJ | pull down |
| glpD | dnaJ | pull down |
| gyrA | dnaJ | pull down |
| hfq  | dnaJ | pull down |
| hslU | dnaJ | pull down |
| hslU | dnaJ | pull down |
| hyfR | dnaJ | pull down |
| ibpA | dnaJ | pull down |
| kdsB | dnaJ | pull down |
| lpxB | dnaJ | pull down |
| lpxD | dnaJ | pull down |
| malT | dnaJ | pull down |
| metK | dnaJ | pull down |
| metK | dnaJ | pull down |
| miaB | dnaJ | pull down |
| mreB | dnaJ | pull down |
| mreB | dnaJ | pull down |
| narG | dnaJ | pull down |
| nusG | dnaJ | pull down |
| prpE | dnaJ | pull down |
| prsA | dnaJ | pull down |
| prsA | dnaJ | pull down |
| pstB | dnaJ | pull down |
| ptsI | dnaJ | pull down |
| pta  | dnaJ | pull down |
| purl | dnaJ | pull down |

|      |      |           |
|------|------|-----------|
| pyrH | dnaJ | pull down |
| recJ | dnaJ | pull down |
| rfaH | dnaJ | pull down |
| rlmN | dnaJ | pull down |
| rlmN | dnaJ | pull down |
| rph  | dnaJ | pull down |
| ruvB | dnaJ | pull down |
| ruvB | dnaJ | pull down |
| selB | dnaJ | pull down |
| selB | dnaJ | pull down |
| smg  | dnaJ | pull down |
| srmB | dnaJ | pull down |
| glyQ | dnaJ | pull down |
| glyQ | dnaJ | pull down |
| ileS | dnaJ | pull down |
| tldD | dnaJ | pull down |
| ubiH | dnaJ | pull down |
| ulaR | dnaJ | pull down |
| uspG | dnaJ | pull down |
| uspG | dnaJ | pull down |
| yagM | dnaJ | pull down |
| ybcJ | dnaJ | pull down |
| ybcJ | dnaJ | pull down |
| ybfL | dnaJ | pull down |
| ybjX | dnaJ | pull down |
| ycgZ | dnaJ | pull down |
| yeaM | dnaJ | pull down |
| yeeN | dnaJ | pull down |
| yfcU | dnaJ | pull down |
| yfiQ | dnaJ | pull down |
| yicC | dnaJ | pull down |
| ypjB | dnaJ | pull down |

|      |      |           |
|------|------|-----------|
| accA | dnaK | pull down |
| accC | dnaK | pull down |
| accD | dnaK | pull down |
| mhpF | dnaK | pull down |
| adhP | dnaK | pull down |
| aes  | dnaK | pull down |
| aidB | dnaK | pull down |
| aidB | dnaK | pull down |
| aldB | dnaK | pull down |
| fbaA | dnaK | pull down |
| fbaA | dnaK | pull down |
| fbaB | dnaK | pull down |

|      |      |                  |
|------|------|------------------|
| alsB | dnaK | pull down        |
| ampC | dnaK | pull down        |
| araF | dnaK | pull down        |
| arcC | dnaK | pull down        |
| aroG | dnaK | pull down        |
| asnB | dnaK | pull down        |
| aspA | dnaK | pull down        |
| aspA | dnaK | pull down        |
| atpH | dnaK | pull down        |
| accB | dnaK | pull down        |
| betA | dnaK | pull down        |
| bioB | dnaK | pull down        |
| caiC | dnaK | pull down        |
| caiD | dnaK | pull down        |
| cbpA | dnaK | pull down        |
| cbpA | dnaK | pull down        |
| cbpA | dnaK | pull down        |
| groS | dnaK | pull down        |
| groS | dnaK | pull down        |
| groL | dnaK | pull down        |
| cheB | dnaK | pull down        |
| cheR | dnaK | pull down        |
| cho  | dnaK | pull down        |
| chpR | dnaK | pull down        |
| clpA | dnaK | pull down        |
| clpB | dnaK | blue native page |
| clpP | dnaK | pull down        |
| clpX | dnaK | pull down        |
| clpX | dnaK | pull down        |
| copA | dnaK | pull down        |
| cueO | dnaK | pull down        |
| cynS | dnaK | pull down        |
| cyoA | dnaK | pull down        |
| cysP | dnaK | pull down        |
| hupA | dnaK | pull down        |
| hupA | dnaK | pull down        |
| hupB | dnaK | pull down        |
| gadA | dnaK | pull down        |
| gadA | dnaK | pull down        |
| gadA | dnaK | pull down        |
| gadB | dnaK | pull down        |
| ddlA | dnaK | pull down        |
| degP | dnaK | pull down        |
| deoR | dnaK | pull down        |
| asd  | dnaK | pull down        |

|      |      |                                     |
|------|------|-------------------------------------|
| dicA | dnaK | pull down                           |
| dicC | dnaK | pull down                           |
| dinD | dnaK | pull down                           |
| dnaC | dnaK | pull down                           |
| dnaJ | dnaK | pull down                           |
| dnaJ | dnaK | classical fluorescence spectroscopy |
| dnaJ | dnaK | surface plasmon resonance           |
| dnaJ | dnaK | surface plasmon resonance           |
| dnaJ | dnaK | surface plasmon resonance           |
| dnaE | dnaK | pull down                           |
| dppF | dnaK | pull down                           |
| dsbG | dnaK | pull down                           |
| tufA | dnaK | pull down                           |
| nth  | dnaK | pull down                           |
| eno  | dnaK | pull down                           |
| eno  | dnaK | pull down                           |
| entA | dnaK | pull down                           |
| eutC | dnaK | pull down                           |
| eutP | dnaK | pull down                           |
| fabF | dnaK | pull down                           |
| fabF | dnaK | pull down                           |
| fdhF | dnaK | pull down                           |
| fdrA | dnaK | pull down                           |
| fepB | dnaK | pull down                           |
| fepC | dnaK | pull down                           |
| fis  | dnaK | pull down                           |
| fixA | dnaK | pull down                           |
| fixB | dnaK | pull down                           |
| fkpB | dnaK | pull down                           |
| flgF | dnaK | pull down                           |
| flgM | dnaK | pull down                           |
| flhD | dnaK | pull down                           |
| fliC | dnaK | pull down                           |
| fliH | dnaK | pull down                           |
| fliJ | dnaK | pull down                           |
| fliK | dnaK | pull down                           |
| flxA | dnaK | pull down                           |
| folC | dnaK | pull down                           |
| folD | dnaK | pull down                           |
| fruR | dnaK | pull down                           |
| ftsA | dnaK | pull down                           |
| ftsZ | dnaK | pull down                           |
| fumC | dnaK | pull down                           |
| gapA | dnaK | pull down                           |
| gapA | dnaK | pull down                           |

|      |      |           |
|------|------|-----------|
| zwf  | dnaK | pull down |
| galM | dnaK | pull down |
| gatD | dnaK | pull down |
| gatR | dnaK | pull down |
| gatY | dnaK | pull down |
| gatY | dnaK | pull down |
| glnK | dnaK | pull down |
| glnQ | dnaK | pull down |
| grxA | dnaK | pull down |
| gltL | dnaK | pull down |
| greA | dnaK | pull down |
| grpE | dnaK | pull down |
| grpE | dnaK | pull down |
| grpE | dnaK | pull down |
| gyrA | dnaK | pull down |
| hcaC | dnaK | pull down |
| helD | dnaK | pull down |
| helD | dnaK | pull down |
| hfq  | dnaK | pull down |
| hinT | dnaK | pull down |
| hisA | dnaK | pull down |
| hldD | dnaK | pull down |
| hofB | dnaK | pull down |
| holA | dnaK | pull down |
| holC | dnaK | pull down |
| holE | dnaK | pull down |
| holE | dnaK | pull down |
| hrpB | dnaK | pull down |
| hslR | dnaK | pull down |
| hslU | dnaK | pull down |
| hslU | dnaK | pull down |
| hyaF | dnaK | pull down |
| infB | dnaK | pull down |
| ihfA | dnaK | pull down |
| intB | dnaK | pull down |
| ppa  | dnaK | pull down |
| iscS | dnaK | pull down |
| ispA | dnaK | pull down |
| ispH | dnaK | pull down |
| kdsB | dnaK | pull down |
| pykF | dnaK | pull down |
| pykA | dnaK | pull down |
| leuA | dnaK | pull down |
| leuC | dnaK | pull down |
| leuD | dnaK | pull down |



|        |      |           |
|--------|------|-----------|
| gloA   | dnaK | pull down |
| gloA   | dnaK | pull down |
| lipA   | dnaK | pull down |
| luxS   | dnaK | pull down |
| maa    | dnaK | pull down |
| malZ   | dnaK | pull down |
| manB   | dnaK | pull down |
| matC   | dnaK | pull down |
| menF   | dnaK | pull down |
| metK   | dnaK | pull down |
| metN   | dnaK | pull down |
| metQ   | dnaK | pull down |
| miaB   | dnaK | pull down |
| mIaC   | dnaK | pull down |
| mIaF   | dnaK | pull down |
| mIiC   | dnaK | pull down |
| mmuM   | dnaK | pull down |
| moeB   | dnaK | pull down |
| mog    | dnaK | pull down |
| mpaA   | dnaK | pull down |
| mreB   | dnaK | pull down |
| mreB   | dnaK | pull down |
| mtnN   | dnaK | pull down |
| murC   | dnaK | pull down |
| murE   | dnaK | pull down |
| mutL   | dnaK | pull down |
| mutY   | dnaK | pull down |
| nadC   | dnaK | pull down |
| nagB   | dnaK | pull down |
| napD   | dnaK | pull down |
| narQ   | dnaK | pull down |
| ndk    | dnaK | pull down |
| nfrA   | dnaK | pull down |
| nfsA   | dnaK | pull down |
| nifU   | dnaK | pull down |
| nikD   | dnaK | pull down |
| nikD   | dnaK | pull down |
| nikE   | dnaK | pull down |
| nlpA   | dnaK | pull down |
| nrdH   | dnaK | pull down |
| nudB   | dnaK | pull down |
| nuoE   | dnaK | pull down |
| yoeA_2 | dnaK | pull down |
| paaB   | dnaK | pull down |
| panC   | dnaK | pull down |

|      |      |           |
|------|------|-----------|
| pdxB | dnaK | pull down |
| pdxK | dnaK | pull down |
| pepD | dnaK | pull down |
| pgk  | dnaK | pull down |
| phoA | dnaK | pull down |
| ppiB | dnaK | pull down |
| ppnK | dnaK | pull down |
| pqqL | dnaK | pull down |
| priB | dnaK | pull down |
| prsA | dnaK | pull down |
| purC | dnaK | pull down |
| purC | dnaK | pull down |
| putA | dnaK | pull down |
| pyrH | dnaK | pull down |
| ycgC | dnaK | pull down |
| qorA | dnaK | pull down |
| queA | dnaK | pull down |
| queC | dnaK | pull down |
| queC | dnaK | pull down |
| racR | dnaK | pull down |
| ravA | dnaK | pull down |
| ravA | dnaK | pull down |
| rbsB | dnaK | pull down |
| rcsA | dnaK | pull down |
| rcsB | dnaK | pull down |
| rcsF | dnaK | pull down |
| recJ | dnaK | pull down |
| relB | dnaK | pull down |
| prfA | dnaK | pull down |
| rhIB | dnaK | pull down |
| rhcC | dnaK | pull down |
| rhcE | dnaK | pull down |
| rhcE | dnaK | pull down |
| rimN | dnaK | pull down |
| rimO | dnaK | pull down |
| nrdB | dnaK | pull down |
| rplJ | dnaK | pull down |
| rplK | dnaK | pull down |
| rplB | dnaK | pull down |
| rplY | dnaK | pull down |
| rplC | dnaK | pull down |
| rpmG | dnaK | pull down |
| rplD | dnaK | pull down |
| rplI | dnaK | pull down |
| rne  | dnaK | pull down |

|      |      |                                    |
|------|------|------------------------------------|
| rne  | dnaK | affinity chromatography technology |
| rne  | dnaK | affinity chromatography technology |
| rne  | dnaK | affinity chromatography technology |
| rne  | dnaK | affinity chromatography technology |
| rne  | dnaK | pull down                          |
| rne  | dnaK | anti tag coimmunoprecipitation     |
| rne  | dnaK | affinity chromatography technology |
| rng  | dnaK | pull down                          |
| rnpA | dnaK | pull down                          |
| rph  | dnaK | pull down                          |
| rpoH | dnaK | pull down                          |
| rpoH | dnaK | pull down                          |
| rpoH | dnaK | pull down                          |
| rpoN | dnaK | pull down                          |
| rpoN | dnaK | pull down                          |
| rpe  | dnaK | pull down                          |
| rpoC | dnaK | pull down                          |
| rpoZ | dnaK | pull down                          |
| rpoZ | dnaK | pull down                          |
| rpsP | dnaK | pull down                          |
| rpsF | dnaK | pull down                          |
| rsgA | dnaK | pull down                          |
| rsmD | dnaK | pull down                          |
| rtcR | dnaK | pull down                          |
| rutA | dnaK | pull down                          |
| rutC | dnaK | pull down                          |
| ruvB | dnaK | pull down                          |
| ruvB | dnaK | pull down                          |
| ruvB | dnaK | pull down                          |
| sdiA | dnaK | pull down                          |
| secA | dnaK | pull down                          |
| serC | dnaK | pull down                          |
| sgbE | dnaK | pull down                          |
| speD | dnaK | pull down                          |
| srlR | dnaK | pull down                          |
| ssb  | dnaK | pull down                          |
| sspA | dnaK | pull down                          |
| sspB | dnaK | pull down                          |
| ssuB | dnaK | pull down                          |
| sbp  | dnaK | pull down                          |
| surA | dnaK | pull down                          |
| alaS | dnaK | pull down                          |
| thrS | dnaK | pull down                          |
| tyrS | dnaK | pull down                          |
| tyrS | dnaK | pull down                          |

|      |      |           |
|------|------|-----------|
| tesB | dnaK | pull down |
| lacA | dnaK | pull down |
| thiB | dnaK | pull down |
| thiG | dnaK | pull down |
| trxC | dnaK | pull down |
| tnaA | dnaK | pull down |
| tpiA | dnaK | pull down |
| treF | dnaK | pull down |
| treR | dnaK | pull down |
| trmB | dnaK | pull down |
| trpE | dnaK | pull down |
| ubiB | dnaK | pull down |
| ubiG | dnaK | pull down |
| ugpB | dnaK | pull down |
| ulaB | dnaK | pull down |
| ulaR | dnaK | pull down |
| ushA | dnaK | pull down |
| uspF | dnaK | pull down |
| uspG | dnaK | pull down |
| uspG | dnaK | pull down |
| uvrA | dnaK | pull down |
| uxaC | dnaK | pull down |
| vsr  | dnaK | pull down |
| xisE | dnaK | pull down |
| wbbJ | dnaK | pull down |
| wcaM | dnaK | pull down |
| wecG | dnaK | pull down |
| ygdG | dnaK | pull down |
| xylG | dnaK | pull down |
| -    | dnaK | pull down |
| yagE | dnaK | pull down |
| yagJ | dnaK | pull down |
| yagK | dnaK | pull down |
| yagL | dnaK | pull down |
| yagP | dnaK | pull down |
| yagQ | dnaK | pull down |
| yagR | dnaK | pull down |
| yagS | dnaK | pull down |
| yahE | dnaK | pull down |
| yahF | dnaK | pull down |
| yahJ | dnaK | pull down |
| yajD | dnaK | pull down |
| ybaE | dnaK | pull down |
| ybaK | dnaK | pull down |
| ybaP | dnaK | pull down |

|      |      |           |
|------|------|-----------|
| ybaZ | dnaK | pull down |
| ybbA | dnaK | pull down |
| ybdD | dnaK | pull down |
| ybdH | dnaK | pull down |
| ybdR | dnaK | pull down |
| ybgL | dnaK | pull down |
| ybgP | dnaK | pull down |
| ybhB | dnaK | pull down |
| ybiA | dnaK | pull down |
| ybiH | dnaK | pull down |
| ybiS | dnaK | pull down |
| ycdB | dnaK | pull down |
| ycdO | dnaK | pull down |
| yceA | dnaK | pull down |
| yceA | dnaK | pull down |
| ycgK | dnaK | pull down |
| ycgL | dnaK | pull down |
| ycgR | dnaK | pull down |
| ycgZ | dnaK | pull down |
| ychG | dnaK | pull down |
| yciH | dnaK | pull down |
| ydaY | dnaK | pull down |
| ydbA | dnaK | pull down |
| ydcK | dnaK | pull down |
| ydeU | dnaK | pull down |
| ydfX | dnaK | pull down |
| ydhQ | dnaK | pull down |
| ydhR | dnaK | pull down |
| ydhR | dnaK | pull down |
| ydiZ | dnaK | pull down |
| ydjA | dnaK | pull down |
| ydjF | dnaK | pull down |
| ydjJ | dnaK | pull down |
| yebR | dnaK | pull down |
| yedF | dnaK | pull down |
| yedN | dnaK | pull down |
| yedY | dnaK | pull down |
| yeeV | dnaK | pull down |
| yehK | dnaK | pull down |
| yejF | dnaK | pull down |
| yfcB | dnaK | pull down |
| yfcD | dnaK | pull down |
| yjfF | dnaK | pull down |
| yfkK | dnaK | pull down |
| ygbT | dnaK | pull down |

|      |      |           |
|------|------|-----------|
| ygcP | dnaK | pull down |
| ygcP | dnaK | pull down |
| ygeP | dnaK | pull down |
| yghA | dnaK | pull down |
| yghR | dnaK | pull down |
| yhdH | dnaK | pull down |
| yhdN | dnaK | pull down |
| yhhX | dnaK | pull down |
| yhjR | dnaK | pull down |
| yibA | dnaK | pull down |
| yicC | dnaK | pull down |
| yidA | dnaK | pull down |
| yidA | dnaK | pull down |
| yidF | dnaK | pull down |
| yiiD | dnaK | pull down |
| yjcF | dnaK | pull down |
| yjdA | dnaK | pull down |
| yjeE | dnaK | pull down |
| yjJI | dnaK | pull down |
| ynaK | dnaK | pull down |
| yqaB | dnaK | pull down |
| yraN | dnaK | pull down |

|      |      |                           |
|------|------|---------------------------|
| accC | dnaN | pull down                 |
| cspA | dnaN | pull down                 |
| cspB | dnaN | pull down                 |
| cspE | dnaN | pull down                 |
| fabI | dnaN | pull down                 |
| fldA | dnaN | pull down                 |
| gph  | dnaN | two hybrid array          |
| hda  | dnaN | pull down                 |
| hinT | dnaN | pull down                 |
| holA | dnaN | two hybrid                |
| holA | dnaN | surface plasmon resonance |
| ppa  | dnaN | pull down                 |
| cadA | dnaN | pull down                 |
| ndk  | dnaN | pull down                 |
| proA | dnaN | pull down                 |
| rpe  | dnaN | pull down                 |
| rpe  | dnaN | pull down                 |
| proS | dnaN | pull down                 |
| yajQ | dnaN | pull down                 |
| ybbN | dnaN | pull down                 |

|      |      |           |
|------|------|-----------|
| ydhR | dnaN | pull down |
| yeaG | dnaN | pull down |
| yghA | dnaN | pull down |

|      |     |           |
|------|-----|-----------|
| flgB | dps | pull down |
| galF | dps | pull down |
| iscA | dps | pull down |
| minE | dps | pull down |
| pepT | dps | pull down |
| rplD | dps | pull down |
| sufS | dps | pull down |
| lysU | dps | pull down |
| lysU | dps | pull down |
| yecF | dps | pull down |
| yfbM | dps | pull down |
| yffB | dps | pull down |
| yfhR | dps | pull down |

|      |     |                       |
|------|-----|-----------------------|
| eco  | eco | x-ray crystallography |
| rhaD | eco | pull down             |
| yeaO | eco | pull down             |
| yeaR | eco | pull down             |

|      |      |           |
|------|------|-----------|
| adhP | fusA | pull down |
| cybC | fusA | pull down |
| groS | fusA | pull down |
| ddpD | fusA | pull down |
| ftsZ | fusA | pull down |
| hslU | fusA | pull down |
| mprA | fusA | pull down |
| mreB | fusA | pull down |
| msbB | fusA | pull down |
| mutY | fusA | pull down |
| pepT | fusA | pull down |
| purD | fusA | pull down |
| puuB | fusA | pull down |
| pyrH | fusA | pull down |
| ribE | fusA | pull down |
| rplD | fusA | pull down |



|      |      |                              |
|------|------|------------------------------|
| rlmN | fusA | pull down                    |
| rnb  | fusA | pull down                    |
| rof  | fusA | pull down                    |
| rsgA | fusA | pull down                    |
| lysU | fusA | pull down                    |
| trxA | fusA | tandem affinity purification |
| trxA | fusA | tandem affinity purification |
| thrC | fusA | pull down                    |
| trpE | fusA | pull down                    |
| ydgA | fusA | pull down                    |
| ydhQ | fusA | pull down                    |

|      |     |                              |
|------|-----|------------------------------|
| trxA | efp | tandem affinity purification |
|------|-----|------------------------------|

|      |     |                                                   |
|------|-----|---------------------------------------------------|
| fusA | tsf | blue native page                                  |
| fusA | tsf | comigration in non denaturing gel electrophoresis |
| tufA | tsf | pull down                                         |
| tufA | tsf | pull down                                         |
| tufA | tsf | pull down                                         |
| tufA | tsf | pull down                                         |
| ompL | tsf | pull down                                         |
| pyrH | tsf | pull down                                         |
| trxA | tsf | tandem affinity purification                      |

|      |      |                  |
|------|------|------------------|
| can  | tufA | pull down        |
| cbpA | tufA | pull down        |
| cca  | tufA | pull down        |
| cedA | tufA | pull down        |
| clpA | tufA | pull down        |
| clpB | tufA | pull down        |
| clpP | tufA | pull down        |
| clpP | tufA | pull down        |
| clpX | tufA | pull down        |
| cutA | tufA | pull down        |
| dmlA | tufA | pull down        |
| dnaA | tufA | pull down        |
| dnaB | tufA | pull down        |
| dnaB | tufA | pull down        |
| dnaJ | tufA | pull down        |
| dnaK | tufA | pull down        |
| dnaK | tufA | pull down        |
| dxs  | tufA | pull down        |
| fusA | tufA | blue native page |

|      |      |                                                   |
|------|------|---------------------------------------------------|
| fusA | tufA | pull down                                         |
| fusA | tufA | comigration in non denaturing gel electrophoresis |
| tsf  | tufA | x-ray crystallography                             |
| tsf  | tufA | blue native page                                  |
| tsf  | tufA | pull down                                         |
| tsf  | tufA | pull down                                         |
| era  | tufA | pull down                                         |
| fabA | tufA | pull down                                         |
| fabZ | tufA | pull down                                         |
| fdnG | tufA | pull down                                         |
| fdnG | tufA | pull down                                         |
| fruR | tufA | pull down                                         |
| ftsA | tufA | pull down                                         |
| ftsA | tufA | pull down                                         |
| ftsE | tufA | pull down                                         |
| ftsZ | tufA | pull down                                         |
| gatY | tufA | pull down                                         |
| gatY | tufA | pull down                                         |
| gcp  | tufA | pull down                                         |
| glmM | tufA | pull down                                         |
| greA | tufA | pull down                                         |
| grpE | tufA | pull down                                         |
| gyrA | tufA | pull down                                         |
| gyrA | tufA | pull down                                         |
| gyrB | tufA | pull down                                         |
| gyrB | tufA | pull down                                         |
| helD | tufA | pull down                                         |
| helD | tufA | pull down                                         |
| hfq  | tufA | pull down                                         |
| hinT | tufA | pull down                                         |
| holE | tufA | pull down                                         |
| hrpA | tufA | pull down                                         |
| hscB | tufA | pull down                                         |
| hscB | tufA | pull down                                         |
| hslO | tufA | pull down                                         |
| hslO | tufA | pull down                                         |
| hslU | tufA | pull down                                         |
| hslU | tufA | pull down                                         |
| hslV | tufA | pull down                                         |
| hypD | tufA | pull down                                         |
| hypD | tufA | pull down                                         |
| ibpA | tufA | pull down                                         |
| ibpA | tufA | pull down                                         |
| ibpB | tufA | pull down                                         |
| iciA | tufA | pull down                                         |

|      |      |           |
|------|------|-----------|
| ppa  | tufA | pull down |
| kdsA | tufA | pull down |
| kdsA | tufA | pull down |
| kdsB | tufA | pull down |
| tmk  | tufA | pull down |
| cadA | tufA | pull down |
| lon  | tufA | pull down |
| lpxB | tufA | pull down |
| lpxB | tufA | pull down |
| malT | tufA | pull down |
| hybC | tufA | pull down |
| hybC | tufA | pull down |
| metK | tufA | pull down |
| metK | tufA | pull down |
| metN | tufA | pull down |
| miaB | tufA | pull down |
| miaB | tufA | pull down |
| miaF | tufA | pull down |
| miaF | tufA | pull down |
| moaA | tufA | pull down |
| mreB | tufA | pull down |
| mreB | tufA | pull down |
| mukB | tufA | pull down |
| mukB | tufA | pull down |
| murA | tufA | pull down |
| murC | tufA | pull down |
| murC | tufA | pull down |
| murI | tufA | pull down |
| mutL | tufA | pull down |
| mutS | tufA | pull down |
| narG | tufA | pull down |
| narH | tufA | pull down |
| nikA | tufA | pull down |
| nikD | tufA | pull down |
| nikE | tufA | pull down |
| nikR | tufA | pull down |
| nusA | tufA | pull down |
| pepT | tufA | pull down |
| plsB | tufA | pull down |
| pncB | tufA | pull down |
| priA | tufA | pull down |
| pstB | tufA | pull down |
| pta  | tufA | pull down |
| pth  | tufA | pull down |
| gatB | tufA | pull down |

|      |      |           |
|------|------|-----------|
| pyrH | tufA | pull down |
| queC | tufA | pull down |
| queC | tufA | pull down |
| ravA | tufA | pull down |
| rcsB | tufA | pull down |
| recJ | tufA | pull down |
| rhIB | tufA | pull down |
| rho  | tufA | pull down |
| ribH | tufA | pull down |
| rlmE | tufA | pull down |
| rlmN | tufA | pull down |
| rlmN | tufA | pull down |
| rne  | tufA | pull down |
| rph  | tufA | pull down |
| rpoB | tufA | pull down |
| rpoD | tufA | pull down |
| rpoS | tufA | pull down |
| rsgA | tufA | pull down |
| rsmD | tufA | pull down |
| ruvB | tufA | pull down |
| secA | tufA | pull down |
| secA | tufA | pull down |
| spoT | tufA | pull down |
| srmB | tufA | pull down |
| sspB | tufA | pull down |
| alaS | tufA | pull down |
| glyQ | tufA | pull down |
| ileS | tufA | pull down |
| tdcD | tufA | pull down |
| ubiE | tufA | pull down |
| ulaR | tufA | pull down |
| ulaR | tufA | pull down |
| usg  | tufA | pull down |
| usg  | tufA | pull down |
| uspG | tufA | pull down |
| uvrY | tufA | pull down |
| viaA | tufA | pull down |
| ybeD | tufA | pull down |
| ybjX | tufA | pull down |
| ybjX | tufA | pull down |
| ycfH | tufA | pull down |
| ydaM | tufA | pull down |
| ydcP | tufA | pull down |
| ydiA | tufA | pull down |
| ydiH | tufA | pull down |

|      |      |           |
|------|------|-----------|
| yejF | tufA | pull down |
| yfbQ | tufA | pull down |
| yfiQ | tufA | pull down |
| yfjK | tufA | pull down |
| ygeV | tufA | pull down |
| yhbJ | tufA | pull down |
| yhbU | tufA | pull down |
| yheS | tufA | pull down |
| yheS | tufA | pull down |
| yicC | tufA | pull down |
| yidA | tufA | pull down |
| yjjV | tufA | pull down |
| yoaA | tufA | pull down |
| yqaB | tufA | pull down |

|      |      |           |
|------|------|-----------|
| mazG | elaB | pull down |
| rlmN | elaB | pull down |
| sspB | elaB | pull down |
| hsdM | elaB | pull down |
| yacl | elaB | pull down |

|      |     |                                    |
|------|-----|------------------------------------|
| cspB | eno | pull down                          |
| hfq  | eno | pull down                          |
| ibpA | eno | pull down                          |
| pgk  | eno | pull down                          |
| pnP  | eno | pull down                          |
| pnP  | eno | pull down                          |
| rhIB | eno | pull down                          |
| rhIB | eno | pull down                          |
| rne  | eno | pull down                          |
| rne  | eno | affinity chromatography technology |
| rne  | eno | affinity chromatography technology |
| rne  | eno | affinity chromatography technology |
| rne  | eno | affinity chromatography technology |
| rne  | eno | affinity chromatography technology |
| rne  | eno | pull down                          |
| rne  | eno | affinity chromatography technology |

|      |     |                                    |
|------|-----|------------------------------------|
| rne  | eno | affinity chromatography technology |
| rne  | eno | molecular sieving                  |
| rng  | eno | pull down                          |
| rpe  | eno | pull down                          |
| lysU | eno | pull down                          |
| lysU | eno | pull down                          |
| thrS | eno | pull down                          |
| trxA | eno | tandem affinity purification       |
| trxA | eno | tandem affinity purification       |
| ybcJ | eno | pull down                          |

|      |      |           |
|------|------|-----------|
| ispA | eutQ | pull down |
| nudK | eutQ | pull down |

|      |      |                              |
|------|------|------------------------------|
| trxA | fabA | tandem affinity purification |
| trxA | fabA | tandem affinity purification |
| tig  | fabA | pull down                    |
| yfaS | fabA | pull down                    |

|      |      |                              |
|------|------|------------------------------|
| acpP | fabB | tandem affinity purification |
| acpP | fabB | pull down                    |
| dnaK | fabB | pull down                    |

|       |      |           |
|-------|------|-----------|
| glsA1 | fabD | pull down |
|-------|------|-----------|

|      |      |                              |
|------|------|------------------------------|
| acpP | fabF | pull down                    |
| acpP | fabF | tandem affinity purification |
| acpP | fabF | pull down                    |
| holB | fabF | pull down                    |
| yeil | fabF | pull down                    |

|      |      |                              |
|------|------|------------------------------|
| acpP | fabG | pull down                    |
| acpP | fabG | pull down                    |
| trxA | fabG | tandem affinity purification |

|      |      |           |
|------|------|-----------|
| acpP | fabH | pull down |
| pepB | fabH | pull down |

|      |      |                              |
|------|------|------------------------------|
| qseB | fabI | pull down                    |
| trxA | fabI | tandem affinity purification |
| yciF | fabI | pull down                    |

|      |      |                              |
|------|------|------------------------------|
| yciT | fabI | pull down                    |
| acpP | fabZ | pull down                    |
| cbpA | fabZ | pull down                    |
| eno  | fabZ | pull down                    |
| gatR | fabZ | pull down                    |
| hycl | fabZ | pull down                    |
| ybeZ | fabZ | pull down                    |
| rne  | fabZ | pull down                    |
| trxA | fabZ | tandem affinity purification |
| yeeN | fabZ | pull down                    |
| appY | fdhE | pull down                    |
| cdh  | fdhE | pull down                    |
| fdnG | fdhE | pull down                    |
| fdnG | fdhE | pull down                    |
| tpiA | fdhE | pull down                    |
| ycil | fdhE | pull down                    |
| dxs  | fdnG | pull down                    |
| fdnH | fdnG | blue native page             |
| fliD | fdnG | pull down                    |
| mngB | fdnG | pull down                    |
| paaY | fdnG | pull down                    |
| rlmL | fdnG | pull down                    |
| yagl | fdnG | pull down                    |
| ychJ | fdnG | pull down                    |
| yddH | fdnG | pull down                    |
| yggS | fdnG | pull down                    |
| fdhE | fdoG | pull down                    |
| moaE | fdoG | pull down                    |
| osmC | fdoG | pull down                    |
| pepQ | fdoG | pull down                    |
| trxA | fdoG | tandem affinity purification |
| udp  | fdoG | pull down                    |
| yddH | fdoG | pull down                    |



|      |      |                                    |
|------|------|------------------------------------|
| iscA | fdx  | pull down                          |
| iscA | fdx  | enzymatic study                    |
| fliC | fhiA | two hybrid array                   |
| rapA | fhiA | pull down                          |
| dpiA | fimC | pull down                          |
| mug  | fimC | pull down                          |
| thiD | fimC | pull down                          |
| fimC | fimF | affinity chromatography technology |
| fimC | fimF | comigration in sds page            |
| fimC | fimF | x-ray crystallography              |
| fimC | fimG | affinity chromatography technology |
| fimC | fimG | comigration in sds page            |
| fimC | fimG | x-ray crystallography              |
| fimC | fimH | x-ray crystallography              |
| fimC | fimH | x-ray crystallography              |
| fimC | fimH | x-ray crystallography              |
| fimC | fimH | affinity chromatography technology |
| fimC | fimH | comigration in sds page            |
| fimC | fimH | x-ray crystallography              |
| hupB | fis  | pull down                          |
| polA | fis  | pull down                          |
| uvrD | fis  | pull down                          |
| yhbT | fis  | pull down                          |
| recG | fkpA | pull down                          |
| rnz  | fkpA | pull down                          |
| ygch | fkpA | pull down                          |
| trxA | fkIB | tandem affinity purification       |
| fbaA | fldA | pull down                          |
| clpP | flgA | pull down                          |
| topA | flgA | two hybrid array                   |

|      |      |                  |
|------|------|------------------|
| xseB | fliC | pull down        |
| fkpB | fliC | pull down        |
| slyD | fliC | pull down        |
| ybcN | fliC | pull down        |
| yggD | fliC | pull down        |
| cheR | fliN | two hybrid array |
| fliI | fliN | two hybrid array |
| fliM | fliN | two hybrid       |
| fliN | fliN | two hybrid array |
| fliR | fliN | two hybrid array |
| fliR | fliN | two hybrid array |
| rpe  | fliN | two hybrid array |
| rpoE | fliN | two hybrid array |
| proS | fliN | two hybrid array |
| yjeK | fliN | two hybrid array |
| xthA | fliT | pull down        |
| flgH | fliT | two hybrid array |
| flgJ | fliT | two hybrid array |
| fliD | fliT | two hybrid array |
| fliI | fliT | two hybrid array |
| fliJ | fliT | two hybrid array |
| fliT | fliT | two hybrid array |
| glpQ | fliT | two hybrid array |
| gmhB | fliT | pull down        |
| hscA | fliT | pull down        |
| metK | fliT | two hybrid array |
| tig  | fliT | pull down        |
| yhcO | fliT | pull down        |
| rpsD | fmt  | pull down        |
| speB | fnr  | pull down        |
| yggW | fnr  | pull down        |
| btuR | folB | pull down        |
| flgN | folX | pull down        |
| wzb  | folX | pull down        |
| frdB | frdA | blue native page |
| ravA | frdA | pull down        |

|      |      |                                                   |
|------|------|---------------------------------------------------|
| frdA | frdB | x-ray crystallography                             |
| frdA | frdB | x-ray crystallography                             |
| frdA | frdB | x-ray crystallography                             |
| frdA | frdB | comigration in non denaturing gel electrophoresis |
| ompW | frdB | anti bait coimmunoprecipitation                   |
| ompW | frdB | far western blotting                              |

|      |     |           |
|------|-----|-----------|
| hemG | fre | pull down |
| metR | fre | pull down |
| mhpR | fre | pull down |
| mobA | fre | pull down |
| rfaH | fre | pull down |
| yihU | fre | pull down |

|      |      |           |
|------|------|-----------|
| intA | frmA | pull down |
| pstB | frmA | pull down |

|      |      |           |
|------|------|-----------|
| folK | fsaB | pull down |
|------|------|-----------|

|     |      |           |
|-----|------|-----------|
| tig | ftnA | pull down |
|-----|------|-----------|

|      |      |           |
|------|------|-----------|
| relA | ftnB | pull down |
|------|------|-----------|

|      |      |           |
|------|------|-----------|
| ftsZ | ftsK | pull down |
| fumC | ftsK | pull down |
| rpoC | ftsK | pull down |
| ybhK | ftsK | pull down |

|      |      |            |
|------|------|------------|
| cysC | ftsQ | pull down  |
| ftsA | ftsQ | two hybrid |
| ftsB | ftsQ | two hybrid |
| ftsI | ftsQ | two hybrid |
| ftsL | ftsQ | two hybrid |
| ftsN | ftsQ | two hybrid |
| ftsN | ftsQ | two hybrid |
| ftsQ | ftsQ | two hybrid |
| ftsX | ftsQ | two hybrid |
| ftsX | ftsQ | two hybrid |
| ymgF | ftsQ | two hybrid |
| ymgF | ftsQ | two hybrid |

|      |      |                                |
|------|------|--------------------------------|
| rnk  | ftsX | pull down                      |
| yggD | ftsX | pull down                      |
| atpD | ftsZ | pull down                      |
| btuR | ftsZ | pull down                      |
| cheR | ftsZ | pull down                      |
| cheW | ftsZ | pull down                      |
| cyoA | ftsZ | pull down                      |
| dmlR | ftsZ | pull down                      |
| fepB | ftsZ | pull down                      |
| ftsE | ftsZ | anti tag coimmunoprecipitation |
| grxA | ftsZ | pull down                      |
| gyrA | ftsZ | pull down                      |
| hslU | ftsZ | pull down                      |
| ibpA | ftsZ | pull down                      |
| ispG | ftsZ | pull down                      |
| sucB | ftsZ | pull down                      |
| trxA | ftsZ | tandem affinity purification   |
| yhcH | ftsZ | pull down                      |
| yhhW | ftsZ | pull down                      |
| zipA | ftsZ | two hybrid                     |
| ravA | fucU | pull down                      |
| dnaB | fumA | pull down                      |
| fumB | fumA | pull down                      |
| ilvB | fumA | pull down                      |
| ydcP | fumA | pull down                      |
| cheA | fumB | pull down                      |
| cheB | fumB | pull down                      |
| fumA | fumB | pull down                      |
| sgrR | fumB | pull down                      |
| yojI | fumB | pull down                      |
| ackA | fur  | pull down                      |
| ada  | fur  | pull down                      |
| can  | fur  | pull down                      |
| katE | fur  | pull down                      |
| cueO | fur  | pull down                      |
| cysC | fur  | pull down                      |
| dinG | fur  | pull down                      |
| eutT | fur  | pull down                      |
| glmU | fur  | pull down                      |
| grxD | fur  | pull down                      |

|      |      |                                                   |
|------|------|---------------------------------------------------|
| grpE | fur  | pull down                                         |
| hypB | fur  | pull down                                         |
| lpxA | fur  | pull down                                         |
| lpxB | fur  | pull down                                         |
| mntR | fur  | pull down                                         |
| moeB | fur  | pull down                                         |
| mrp  | fur  | pull down                                         |
| mtlR | fur  | pull down                                         |
| nadB | fur  | pull down                                         |
| nusA | fur  | pull down                                         |
| sucB | fur  | pull down                                         |
| ybeZ | fur  | pull down                                         |
| potF | fur  | pull down                                         |
| psd  | fur  | pull down                                         |
| ptrB | fur  | pull down                                         |
| rfaZ | fur  | pull down                                         |
| rhmD | fur  | pull down                                         |
| ribD | fur  | pull down                                         |
| rimO | fur  | pull down                                         |
| rlmA | fur  | pull down                                         |
| rpoA | fur  | pull down                                         |
| soxS | fur  | pull down                                         |
| trxA | fur  | tandem affinity purification                      |
| tilS | fur  | pull down                                         |
| tktB | fur  | pull down                                         |
| tpiA | fur  | pull down                                         |
| umuD | fur  | pull down                                         |
| wcaA | fur  | pull down                                         |
| yacl | fur  | pull down                                         |
| ybcM | fur  | pull down                                         |
| ybeD | fur  | pull down                                         |
| ycgY | fur  | pull down                                         |
| ydaT | fur  | pull down                                         |
| yecC | fur  | pull down                                         |
| yegS | fur  | pull down                                         |
| yehX | fur  | pull down                                         |
| yggF | fur  | pull down                                         |
| ygiC | fur  | pull down                                         |
| yqgE | fur  | pull down                                         |
| aldA | gapA | comigration in non denaturing gel electrophoresis |
| cheZ | gapA | pull down                                         |
| gph  | gapA | pull down                                         |

|      |      |                              |
|------|------|------------------------------|
| greA | gapA | pull down                    |
| helD | gapA | pull down                    |
| ogt  | gapA | pull down                    |
| rsgA | gapA | pull down                    |
| trxA | gapA | tandem affinity purification |
| trxA | gapA | tandem affinity purification |
| tig  | gapA | pull down                    |
| tusA | gapA | pull down                    |
| yfaS | gapA | pull down                    |
| yfjK | gapA | pull down                    |
| yiiD | gapA | pull down                    |
| yjeE | gapA | pull down                    |

|      |     |           |
|------|-----|-----------|
| yahl | zwf | pull down |
| betI | zwf | pull down |
| bioH | zwf | pull down |
| can  | zwf | pull down |
| carB | zwf | pull down |
| cobT | zwf | pull down |
| gcd  | zwf | pull down |
| fepE | zwf | pull down |
| iraP | zwf | pull down |
| livK | zwf | pull down |
| manA | zwf | pull down |
| menH | zwf | pull down |
| miaA | zwf | pull down |
| msbB | zwf | pull down |
| pflB | zwf | pull down |
| pncB | zwf | pull down |
| ppiD | zwf | pull down |
| purE | zwf | pull down |
| rluD | zwf | pull down |
| rnk  | zwf | pull down |
| sdaA | zwf | pull down |
| soxS | zwf | pull down |
| sucC | zwf | pull down |
| yacF | zwf | pull down |
| yacL | zwf | pull down |
| yaeR | zwf | pull down |
| yaiA | zwf | pull down |
| ybaP | zwf | pull down |
| ybdD | zwf | pull down |
| ybdL | zwf | pull down |
| ybdM | zwf | pull down |
| ybdN | zwf | pull down |

|      |     |           |
|------|-----|-----------|
| ybgJ | zwf | pull down |
| ybhO | zwf | pull down |
| ybiU | zwf | pull down |
| ydjI | zwf | pull down |
| yhhW | zwf | pull down |

|      |     |           |
|------|-----|-----------|
| gatZ | pgi | pull down |
| hyfR | pgi | pull down |
| rcaA | pgi | pull down |
| thiE | pgi | pull down |
| thiM | pgi | pull down |
| yejH | pgi | pull down |
| yhiJ | pgi | pull down |

|      |      |           |
|------|------|-----------|
| icc  | gadX | pull down |
| intD | gadX | pull down |
| nanA | gadX | pull down |
| rpoD | gadX | pull down |

|      |      |           |
|------|------|-----------|
| manC | galF | pull down |
| mutS | galF | pull down |
| mutY | galF | pull down |
| priA | galF | pull down |
| rluD | galF | pull down |
| yeil | galF | pull down |
| yggL | galF | pull down |
| ygiC | galF | pull down |
| ymjA | galF | pull down |

|      |      |           |
|------|------|-----------|
| ygfA | galM | pull down |
|------|------|-----------|

|      |      |           |
|------|------|-----------|
| ilvG | galR | pull down |
| recJ | galR | pull down |

|      |      |           |
|------|------|-----------|
| galF | galU | pull down |
| ppnK | galU | pull down |

|     |      |           |
|-----|------|-----------|
| tig | gatD | pull down |
|-----|------|-----------|

|      |      |                                          |
|------|------|------------------------------------------|
| groL | gatY | cosedimentation through density gradient |
| dnaJ | gatY | pull down                                |



|      |      |                                                   |
|------|------|---------------------------------------------------|
| ftsZ | gatY | pull down                                         |
| gatZ | gatY | comigration in non denaturing gel electrophoresis |
| ibpA | gatY | pull down                                         |
| ibpB | gatY | pull down                                         |
| mreB | gatY | pull down                                         |
| pstB | gatY | pull down                                         |
| rlmN | gatY | pull down                                         |

|      |      |           |
|------|------|-----------|
| apt  | gatZ | pull down |
| gapA | gatZ | pull down |
| greA | gatZ | pull down |
| hslU | gatZ | pull down |
| malY | gatZ | pull down |
| mtnN | gatZ | pull down |
| pyrH | gatZ | pull down |
| rplD | gatZ | pull down |
| secA | gatZ | pull down |
| serS | gatZ | pull down |
| tig  | gatZ | pull down |

|      |      |           |
|------|------|-----------|
| cysB | gcvP | pull down |
| helD | gcvP | pull down |
| holA | gcvP | pull down |
| queF | gcvP | pull down |

|     |      |           |
|-----|------|-----------|
| tig | gldA | pull down |
|-----|------|-----------|

|      |     |           |
|------|-----|-----------|
| tdcD | glf | pull down |
|------|-----|-----------|

|     |     |           |
|-----|-----|-----------|
| tig | glk | pull down |
|-----|-----|-----------|

|      |      |           |
|------|------|-----------|
| ispE | glmS | pull down |
|------|------|-----------|

|      |      |           |
|------|------|-----------|
| glpC | glnA | pull down |
| gudX | glnA | pull down |
| pdxY | glnA | pull down |
| tusA | glnA | pull down |

|      |      |           |
|------|------|-----------|
| appY | glnD | pull down |
|------|------|-----------|

|      |      |            |
|------|------|------------|
| katE | glnD | pull down  |
| fepC | glnD | pull down  |
| ftsY | glnD | pull down  |
| glnB | glnD | two hybrid |
| glnB | glnD | two hybrid |
| glnK | glnD | two hybrid |
| gmd  | glnD | pull down  |
| holC | glnD | pull down  |
| msbB | glnD | pull down  |
| murG | glnD | pull down  |
| thiD | glnD | pull down  |
| yajD | glnD | pull down  |

|      |      |                                                   |
|------|------|---------------------------------------------------|
| mhpF | glpD | pull down                                         |
| acrR | glpD | pull down                                         |
| thrA | glpD | pull down                                         |
| atpD | glpD | pull down                                         |
| atpH | glpD | pull down                                         |
| betI | glpD | pull down                                         |
| bglG | glpD | pull down                                         |
| can  | glpD | pull down                                         |
| carB | glpD | pull down                                         |
| cheZ | glpD | pull down                                         |
| citD | glpD | pull down                                         |
| cobT | glpD | pull down                                         |
| copA | glpD | pull down                                         |
| cyoA | glpD | pull down                                         |
| damX | glpD | pull down                                         |
| gadA | glpD | comigration in non denaturing gel electrophoresis |
| gadA | glpD | comigration in non denaturing gel electrophoresis |
| gcd  | glpD | pull down                                         |
| dam  | glpD | pull down                                         |
| dpiB | glpD | pull down                                         |
| entA | glpD | pull down                                         |
| entB | glpD | pull down                                         |
| erpA | glpD | pull down                                         |
| fabG | glpD | pull down                                         |
| fepB | glpD | pull down                                         |
| fepC | glpD | pull down                                         |
| fepE | glpD | pull down                                         |
| fkpB | glpD | pull down                                         |

|      |      |           |
|------|------|-----------|
| flk  | glpD | pull down |
| frmA | glpD | pull down |
| frmR | glpD | pull down |
| gatD | glpD | pull down |
| glnD | glpD | pull down |
| hemH | glpD | pull down |
| mhpE | glpD | pull down |
| iraP | glpD | pull down |
| thrB | glpD | pull down |
| livF | glpD | pull down |
| lpxB | glpD | pull down |
| lpxH | glpD | pull down |
| mhpA | glpD | pull down |
| mhpB | glpD | pull down |
| mlrA | glpD | pull down |
| msbB | glpD | pull down |
| murG | glpD | pull down |
| phoU | glpD | pull down |
| ppiB | glpD | pull down |
| ppiD | glpD | pull down |
| pstB | glpD | pull down |
| psuG | glpD | pull down |
| queC | glpD | pull down |
| recF | glpD | pull down |
| rfaC | glpD | pull down |
| ribF | glpD | pull down |
| rluD | glpD | pull down |
| rpoE | glpD | pull down |
| ileS | glpD | pull down |
| thiC | glpD | pull down |
| ubiF | glpD | pull down |
| ubiG | glpD | pull down |
| uspG | glpD | pull down |
| wecG | glpD | pull down |
| yacF | glpD | pull down |
| yacL | glpD | pull down |
| yadG | glpD | pull down |
| yail | glpD | pull down |
| ybaP | glpD | pull down |
| ybbO | glpD | pull down |
| ybdD | glpD | pull down |
| ybdH | glpD | pull down |
| ybhO | glpD | pull down |
| ybhP | glpD | pull down |
| ydiS | glpD | pull down |

|      |      |                                                   |
|------|------|---------------------------------------------------|
| yfbQ | glpD | pull down                                         |
| yfcH | glpD | pull down                                         |
| yidB | glpD | pull down                                         |
| yihL | glpD | pull down                                         |
| yiiS | glpD | pull down                                         |
| yjfl | glpD | pull down                                         |
| yqhD | glpD | pull down                                         |
| allR | glpK | pull down                                         |
| astE | glpK | pull down                                         |
| chpR | glpK | pull down                                         |
| cspC | glpK | pull down                                         |
| dksA | glpK | pull down                                         |
| dmlR | glpK | pull down                                         |
| eno  | glpK | comigration in non denaturing gel electrophoresis |
| fdx  | glpK | pull down                                         |
| mug  | glpK | pull down                                         |
| yacL | glpK | pull down                                         |
| yejF | glpK | pull down                                         |
| yfcU | glpK | pull down                                         |
| yfdQ | glpK | pull down                                         |
| yggS | glpK | pull down                                         |
| ykgD | glpK | pull down                                         |
| udk  | grxB | pull down                                         |
| psuG | grxC | pull down                                         |
| bolA | grxD | pull down                                         |
| zntA | gltB | pull down                                         |
| dxs  | gltB | pull down                                         |
| entB | gltB | pull down                                         |
| fkpB | gltB | pull down                                         |
| gltD | gltB | pull down                                         |
| gltD | gltB | pull down                                         |
| hisB | gltB | pull down                                         |
| metH | gltB | pull down                                         |
| yddE | gltB | pull down                                         |
| ascB | gltD | pull down                                         |
| murF | gltD | pull down                                         |
| nfrA | gltD | pull down                                         |

|      |      |           |
|------|------|-----------|
| aspS | gltD | pull down |
| yfaA | gltD | pull down |

|      |      |           |
|------|------|-----------|
| ackA | glyA | pull down |
| hmp  | glyA | pull down |
| kil  | glyA | pull down |

|      |      |           |
|------|------|-----------|
| fdhE | gmhB | pull down |
| rpoD | gmhB | pull down |

|      |      |           |
|------|------|-----------|
| hscA | gnsA | pull down |
| kil  | gnsA | pull down |

|      |      |           |
|------|------|-----------|
| galM | gpmA | pull down |
| ibpA | gpmA | pull down |
| supH | gpmA | pull down |
| yagM | gpmA | pull down |

|      |      |           |
|------|------|-----------|
| cobU | gpmB | pull down |
| hslU | gpmB | pull down |
| nuol | gpmB | pull down |
| ylbA | gpmB | pull down |

|      |      |                                                                       |
|------|------|-----------------------------------------------------------------------|
| ahpC | gpml | comigration in non denaturing gel electrophoresis<br>blue native page |
| gpmA | gpml |                                                                       |

|      |      |           |
|------|------|-----------|
| pflB | grcA | pull down |
| pflB | grcA | pull down |
| queC | grcA | pull down |
| slyD | grcA | pull down |
| lysU | grcA | pull down |
| tpiA | grcA | pull down |
| tpiA | grcA | pull down |
| ycgF | grcA | pull down |

|        |      |                  |
|--------|------|------------------|
| accC   | greA | pull down        |
| ackA   | greA | pull down        |
| clpP   | greA | pull down        |
| hupB   | greA | pull down        |
| lysA   | greA | pull down        |
| dksA   | greA | blue native page |
| fecl   | greA | pull down        |
| fkpB   | greA | pull down        |
| fxsA   | greA | pull down        |
| grpE   | greA | pull down        |
| hscC   | greA | pull down        |
| infB   | greA | pull down        |
| iscS   | greA | pull down        |
| yoeA_2 | greA | pull down        |
| rpmA   | greA | pull down        |
| rpoA   | greA | pull down        |
| sspB   | greA | pull down        |
| tauD   | greA | pull down        |
| ycgZ   | greA | pull down        |
| yiiS   | greA | pull down        |

|      |      |                  |
|------|------|------------------|
| groL | grpE | pull down        |
| clpX | grpE | pull down        |
| dnaK | grpE | blue native page |
| dnaK | grpE | pull down        |
| dnaK | grpE | pull down        |
| eutP | grpE | pull down        |
| holA | grpE | pull down        |
| infB | grpE | pull down        |
| ravA | grpE | pull down        |
| yfiH | grpE | pull down        |

|      |      |           |
|------|------|-----------|
| yjgD | gshA | pull down |
|------|------|-----------|

|      |     |           |
|------|-----|-----------|
| queD | gor | pull down |
| yfcL | gor | pull down |

|      |     |           |
|------|-----|-----------|
| pdxH | gst | pull down |
|------|-----|-----------|

|      |      |           |
|------|------|-----------|
| amyA | guaA | pull down |
| diaA | guaA | pull down |

|      |      |                                                   |
|------|------|---------------------------------------------------|
| oppA | guaA | pull down                                         |
| rsmA | guaA | pull down                                         |
| ybgK | guaA | pull down                                         |
| yegV | guaA | pull down                                         |
| acrD | gyrA | pull down                                         |
| clpP | gyrA | pull down                                         |
| dnaK | gyrA | blue native page                                  |
| fdhE | gyrA | pull down                                         |
| fliS | gyrA | two hybrid array                                  |
| gyrA | gyrA | two hybrid array                                  |
| gyrB | gyrA | pull down                                         |
| gyrB | gyrA | pull down                                         |
| gyrB | gyrA | comigration in non denaturing gel electrophoresis |
| hscC | gyrA | pull down                                         |
| kdsA | gyrA | pull down                                         |
| lsrK | gyrA | pull down                                         |
| mog  | gyrA | pull down                                         |
| mreB | gyrA | pull down                                         |
| msbB | gyrA | pull down                                         |
| parC | gyrA | pull down                                         |
| rpmJ | gyrA | two hybrid array                                  |
| rpsE | gyrA | pull down                                         |
| ssb  | gyrA | pull down                                         |
| smpB | gyrA | pull down                                         |
| yacG | gyrA | pull down                                         |
| yacG | gyrA | pull down                                         |
| ygcB | gyrA | pull down                                         |
| yjeJ | gyrA | pull down                                         |
| gyrA | gyrB | pull down                                         |
| gyrA | gyrB | pull down                                         |
| metN | gyrB | pull down                                         |
| moaA | gyrB | pull down                                         |
| prfC | gyrB | pull down                                         |
| rlmN | gyrB | pull down                                         |
| rpsE | gyrB | pull down                                         |
| smpB | gyrB | pull down                                         |
| yacG | gyrB | pull down                                         |
| yacG | gyrB | pull down                                         |
| asnC | hchA | pull down                                         |
| betI | hchA | pull down                                         |



|      |      |           |
|------|------|-----------|
| cobS | hchA | pull down |
| cspB | hchA | pull down |
| cspE | hchA | pull down |
| cspG | hchA | pull down |
| cspI | hchA | pull down |
| cysD | hchA | pull down |
| eutC | hchA | pull down |
| fabB | hchA | pull down |
| ftsE | hchA | pull down |
| hemH | hchA | pull down |
| hycG | hchA | pull down |
| livG | hchA | pull down |
| mcbR | hchA | pull down |
| mprA | hchA | pull down |
| narP | hchA | pull down |
| oxc  | hchA | pull down |
| pncB | hchA | pull down |
| pphB | hchA | pull down |
| pyrG | hchA | pull down |
| racC | hchA | pull down |
| rsd  | hchA | pull down |
| rstA | hchA | pull down |
| srID | hchA | pull down |
| uidR | hchA | pull down |
| ydiV | hchA | pull down |
| yfbQ | hchA | pull down |
| yfjK | hchA | pull down |

|      |      |           |
|------|------|-----------|
| qseB | hdhA | pull down |
| tus  | hdhA | pull down |

|      |      |           |
|------|------|-----------|
| cyoA | heID | pull down |
| ddlA | heID | pull down |
| dnaE | heID | pull down |
| fiu  | heID | pull down |
| fIdA | heID | pull down |
| hisB | heID | pull down |

|      |      |           |
|------|------|-----------|
| hscC | helD | pull down |
| mhpB | helD | pull down |
| pepB | helD | pull down |
| rnk  | helD | pull down |
| glyS | helD | pull down |
| yidF | helD | pull down |

|      |      |           |
|------|------|-----------|
| ftsY | hemB | pull down |
| rihA | hemB | pull down |

|      |      |           |
|------|------|-----------|
| ftsH | hfIC | pull down |
| oxaA | hfIC | pull down |
| pdxB | hfIC | pull down |
| yggF | hfIC | pull down |

|      |      |           |
|------|------|-----------|
| cheW | hfIK | pull down |
| cyoA | hfIK | pull down |
| fepB | hfIK | pull down |
| hofQ | hfIK | pull down |
| sucA | hfIK | pull down |
| oxaA | hfIK | pull down |
| ppiB | hfIK | pull down |
| uspF | hfIK | pull down |
| yecA | hfIK | pull down |

|      |     |           |
|------|-----|-----------|
| agp  | hfq | pull down |
| cspA | hfq | pull down |
| cspB | hfq | pull down |
| cspC | hfq | pull down |
| cspE | hfq | pull down |
| dps  | hfq | pull down |
| elaB | hfq | pull down |
| fliS | hfq | pull down |
| lpxA | hfq | pull down |
| pgk  | hfq | pull down |
| psuK | hfq | pull down |
| rne  | hfq | pull down |
| topA | hfq | pull down |
| yacl | hfq | pull down |
| yecF | hfq | pull down |
| yjfl | hfq | pull down |
| yobB | hfq | pull down |

|      |      |           |
|------|------|-----------|
| rlmN | hinT | pull down |
| mviM | hisG | pull down |
| pabA | hisA | pull down |
| tig  | hisB | pull down |
| dnaK | hisC | pull down |
| aidB | hldD | pull down |
| groS | hldD | pull down |
| groS | hldD | pull down |
| clpP | hldD | pull down |
| clpP | hldD | pull down |
| ndh  | hldD | pull down |
| dps  | hldD | pull down |
| dps  | hldD | pull down |
| fadI | hldD | pull down |
| fruR | hldD | pull down |
| ftsE | hldD | pull down |
| hcaB | hldD | pull down |
| iclR | hldD | pull down |
| ppa  | hldD | pull down |
| ispF | hldD | pull down |
| kdsA | hldD | pull down |
| lldD | hldD | pull down |
| lpxD | hldD | pull down |
| menB | hldD | pull down |
| menB | hldD | pull down |
| narG | hldD | pull down |
| ribH | hldD | pull down |
| ribH | hldD | pull down |
| rph  | hldD | pull down |
| ubiH | hldD | pull down |
| uspG | hldD | pull down |
| ybjQ | hldD | pull down |
| ybjX | hldD | pull down |
| ydiH | hldD | pull down |
| cedA | hns  | pull down |

|      |     |                  |
|------|-----|------------------|
| cspC | hns | blue native page |
| hupB | hns | pull down        |
| polA | hns | pull down        |
| fldA | hns | pull down        |
| holE | hns | pull down        |
| nfi  | hns | pull down        |
| obgE | hns | pull down        |
| paaY | hns | pull down        |
| pepT | hns | pull down        |
| priB | hns | pull down        |
| pyrH | hns | pull down        |
| rpsL | hns | pull down        |
| yqgF | hns | pull down        |
| sbm  | hns | pull down        |
| topA | hns | pull down        |
| torA | hns | pull down        |
| uvrB | hns | pull down        |
| uvrD | hns | pull down        |
| yceD | hns | pull down        |
| ychJ | hns | pull down        |
| ydjF | hns | pull down        |
| yeeN | hns | pull down        |
| yejG | hns | pull down        |
| yidB | hns | pull down        |
| yiiS | hns | pull down        |
| yqcA | hns | pull down        |

|      |      |           |
|------|------|-----------|
| cspC | hrpA | pull down |
| cspE | hrpA | pull down |
| deaN | hrpA | pull down |
| polA | hrpA | pull down |
| dps  | hrpA | pull down |
| hfq  | hrpA | pull down |
| maeB | hrpA | pull down |
| rlmN | hrpA | pull down |

|      |      |                              |
|------|------|------------------------------|
| rluB | hrpA | pull down                    |
| rluB | hrpA | pull down                    |
| rluC | hrpA | pull down                    |
| spoT | hrpA | pull down                    |
| trmB | hrpA | pull down                    |
| cbpA | hscA | pull down                    |
| dnaK | hscA | pull down                    |
| nifU | hscA | pull down                    |
| nifU | hscA | pull down                    |
| yphE | hscA | pull down                    |
| hscC | hslR | pull down                    |
| cyoA | hslU | pull down                    |
| hslU | hslU | two hybrid                   |
| hslV | hslU | pull down                    |
| sufI | hslU | pull down                    |
| trxA | hslU | tandem affinity purification |
| trxA | hslU | tandem affinity purification |
| ydjF | hslU | pull down                    |
| hslU | hslV | pull down                    |
| hslU | hslV | x-ray crystallography        |
| hslU | hslV | x-ray crystallography        |
| hslU | hslV | x-ray crystallography        |
| hslU | hslV | x-ray crystallography        |
| hslU | hslV | two hybrid                   |
| hslV | hslV | two hybrid                   |
| agaS | htpG | pull down                    |
| apaH | htpG | pull down                    |
| groS | htpG | pull down                    |
| clpS | htpG | pull down                    |
| cyoA | htpG | pull down                    |
| hupB | htpG | pull down                    |
| dam  | htpG | pull down                    |
| dnaK | htpG | pull down                    |
| envY | htpG | pull down                    |
| recD | htpG | pull down                    |
| grxA | htpG | pull down                    |
| glvG | htpG | pull down                    |
| hemH | htpG | pull down                    |

|      |      |                              |
|------|------|------------------------------|
| hscB | htpG | pull down                    |
| hyfG | htpG | pull down                    |
| adk  | htpG | pull down                    |
| leuA | htpG | pull down                    |
| livF | htpG | pull down                    |
| napD | htpG | pull down                    |
| narQ | htpG | pull down                    |
| pbpC | htpG | pull down                    |
| rcaF | htpG | pull down                    |
| rfaF | htpG | pull down                    |
| rnb  | htpG | pull down                    |
| rpoC | htpG | pull down                    |
| rpsB | htpG | pull down                    |
| sspB | htpG | pull down                    |
| stpA | htpG | pull down                    |
| trxA | htpG | tandem affinity purification |
| trxA | htpG | tandem affinity purification |
| tig  | htpG | pull down                    |
| trpE | htpG | pull down                    |
| ushA | htpG | pull down                    |
| yagE | htpG | pull down                    |
| yagJ | htpG | pull down                    |
| yagS | htpG | pull down                    |
| ybdL | htpG | pull down                    |
| ybhK | htpG | pull down                    |
| ybiS | htpG | pull down                    |
| ycbK | htpG | pull down                    |
| ycdO | htpG | pull down                    |
| ydhZ | htpG | pull down                    |
| yebR | htpG | pull down                    |
| yeeV | htpG | pull down                    |
| yfiQ | htpG | pull down                    |
| ygcl | htpG | pull down                    |
| ygeV | htpG | pull down                    |
| yibD | htpG | pull down                    |
| yoaA | htpG | pull down                    |
| yqeB | htpG | pull down                    |

|      |      |           |
|------|------|-----------|
| yfiF | hybD | pull down |
|------|------|-----------|

|      |      |                              |
|------|------|------------------------------|
| trxA | icd  | tandem affinity purification |
| trxA | icd  | tandem affinity purification |
| aat  | infA | pull down                    |
| accA | infB | pull down                    |
| clpB | infB | blue native page             |
| cspB | infB | pull down                    |
| dnaJ | infB | pull down                    |
| entB | infB | pull down                    |
| fliA | infB | pull down                    |
| helD | infB | pull down                    |
| holA | infB | pull down                    |
| hyfR | infB | pull down                    |
| ibpA | infB | pull down                    |
| lsrK | infB | pull down                    |
| nusA | infB | pull down                    |
| nusA | infB | pull down                    |
| nusA | infB | pull down                    |
| ravA | infB | pull down                    |
| rlmN | infB | pull down                    |
| rodZ | infB | pull down                    |
| rpoD | infB | pull down                    |
| rpoD | infB | pull down                    |
| rsmG | infB | pull down                    |
| sspB | infB | pull down                    |
| smpB | infB | pull down                    |
| yecA | infB | pull down                    |
| yeeN | infB | pull down                    |
| cbpA | infC | pull down                    |
| rlmN | infC | pull down                    |
| rnr  | infC | pull down                    |
| secA | infC | pull down                    |
| hupB | ihfA | pull down                    |



|      |      |           |
|------|------|-----------|
| folM | ihfA | pull down |
| ihfB | ihfA | pull down |
| iraP | ihfA | pull down |
| lpxH | ihfA | pull down |
| mfd  | ihfA | pull down |
| mqsR | ihfA | pull down |
| nfi  | ihfA | pull down |
| rnrr | ihfA | pull down |
| yfiF | ihfA | pull down |

|      |      |           |
|------|------|-----------|
| hupB | ihfB | pull down |
| hcaC | ihfB | pull down |
| ihfA | ihfB | pull down |
| nfi  | ihfB | pull down |

|      |      |           |
|------|------|-----------|
| greA | guaB | pull down |
|------|------|-----------|

|     |     |                       |
|-----|-----|-----------------------|
| cda | cdi | x-ray crystallography |
|-----|-----|-----------------------|

|      |      |           |
|------|------|-----------|
| fabH | intS | pull down |
| fepC | intS | pull down |
| flgG | intS | pull down |
| fre  | intS | pull down |
| kil  | intS | pull down |
| lpxH | intS | pull down |
| nrde | intS | pull down |
| rplQ | intS | pull down |
| sodA | intS | pull down |

|      |      |           |
|------|------|-----------|
| yiiS | iscA | pull down |
|------|------|-----------|

|      |      |                              |
|------|------|------------------------------|
| acpP | iscS | tandem affinity purification |
| appY | iscS | pull down                    |
| atpH | iscS | pull down                    |
| baeR | iscS | pull down                    |
| lpdA | iscS | pull down                    |
| engD | iscS | pull down                    |
| fdhD | iscS | pull down                    |
| fdhD | iscS | pull down                    |

|      |      |           |
|------|------|-----------|
| fdx  | iscS | pull down |
| gnsA | iscS | pull down |
| hcaC | iscS | pull down |
| hofQ | iscS | pull down |
| menE | iscS | pull down |
| miaA | iscS | pull down |
| murF | iscS | pull down |
| nifU | iscS | pull down |
| nifU | iscS | pull down |
| nifU | iscS | pull down |
| nifU | iscS | pull down |
| nifU | iscS | pull down |
| nusG | iscS | pull down |
| panB | iscS | pull down |
| proA | iscS | pull down |
| pyrE | iscS | pull down |
| queC | iscS | pull down |
| rhaR | iscS | pull down |
| rimO | iscS | pull down |
| rlmA | iscS | pull down |
| rnk  | iscS | pull down |
| rraA | iscS | pull down |
| sprT | iscS | pull down |
| tusA | iscS | pull down |
| tusA | iscS | pull down |
| ybeL | iscS | pull down |
| yeaK | iscS | pull down |
| yech | iscS | pull down |
| ygaD | iscS | pull down |
| ymjA | iscS | pull down |
| <br> |      |           |
| cysC | ispD | pull down |
| tig  | ispD | pull down |

|      |      |           |
|------|------|-----------|
| moeA | pfkA | pull down |
| tpiA | pfkA | pull down |
| ucpA | pfkA | pull down |

|      |      |                                    |
|------|------|------------------------------------|
| cheW | adk  | pull down                          |
| clpP | adk  | pull down                          |
| entB | adk  | pull down                          |
| frmR | adk  | pull down                          |
| glnB | adk  | pull down                          |
| sfmC | adk  | pull down                          |
| tig  | adk  | pull down                          |
| yihI | adk  | pull down                          |
|      |      |                                    |
| gsp  | katG | pull down                          |
| holE | katG | pull down                          |
| ppa  | katG | pull down                          |
| murE | katG | pull down                          |
| fruB | katG | pull down                          |
| trxA | katG | tandem affinity purification       |
|      |      |                                    |
| ebgC | kbl  | pull down                          |
| ydcP | kbl  | pull down                          |
|      |      |                                    |
| frlD | kdsB | pull down                          |
| kdsA | kdsB | pull down                          |
| nemR | kdsB | pull down                          |
|      |      |                                    |
| argG | kefA | pull down                          |
| nusG | kefA | pull down                          |
| rne  | kefA | affinity chromatography technology |
| rne  | kefA | affinity chromatography technology |
| rne  | kefA | affinity chromatography technology |
| rne  | kefA | affinity chromatography technology |
| rne  | kefA | affinity chromatography technology |
| rne  | kefA | affinity chromatography technology |
| rne  | kefA | affinity chromatography technology |
|      |      |                                    |
| pgl  | prs  | pull down                          |

|      |     |           |
|------|-----|-----------|
| aaeR | prs | pull down |
| accA | prs | pull down |
| allS | prs | pull down |
| arcA | prs | pull down |
| basR | prs | pull down |
| betI | prs | pull down |
| bioA | prs | pull down |
| bioC | prs | pull down |
| clpP | prs | pull down |
| cspE | prs | pull down |
| cynS | prs | pull down |
| cyoA | prs | pull down |
| dbpA | prs | pull down |
| ddpD | prs | pull down |
| ddpF | prs | pull down |
| dpiA | prs | pull down |
| nei  | prs | pull down |
| erfK | prs | pull down |
| recB | prs | pull down |
| fliD | prs | pull down |
| fnr  | prs | pull down |
| ftsE | prs | pull down |
| fumC | prs | pull down |
| greA | prs | pull down |
| hns  | prs | pull down |
| mhpE | prs | pull down |
| hslV | prs | pull down |
| hych | prs | pull down |
| pykF | prs | pull down |
| livG | prs | pull down |
| lpxB | prs | pull down |
| manA | prs | pull down |
| trg  | prs | pull down |
| meiR | prs | pull down |
| metK | prs | pull down |
| miaB | prs | pull down |
| mngR | prs | pull down |
| mntR | prs | pull down |
| modF | prs | pull down |
| mraZ | prs | pull down |
| mukB | prs | pull down |
| mukE | prs | pull down |
| nac  | prs | pull down |
| narY | prs | pull down |
| nsrR | prs | pull down |

|       |     |           |
|-------|-----|-----------|
| ompR  | prs | pull down |
| pabB  | prs | pull down |
| phnD  | prs | pull down |
| proB  | prs | pull down |
| pphB  | prs | pull down |
| pth   | prs | pull down |
| purL  | prs | pull down |
| rdgC  | prs | pull down |
| recR  | prs | pull down |
| rluD  | prs | pull down |
| rfbD  | prs | pull down |
| rnk   | prs | pull down |
| rsmH  | prs | pull down |
| rstA  | prs | pull down |
| yqgF  | prs | pull down |
| sbcC  | prs | pull down |
| sirB1 | prs | pull down |
| sprT  | prs | pull down |
| stfQ  | prs | pull down |
| stpA  | prs | pull down |
| sucC  | prs | pull down |
| lacA  | prs | pull down |
| trxC  | prs | pull down |
| tpiA  | prs | pull down |
| tusA  | prs | pull down |
| ung   | prs | pull down |
| wcaA  | prs | pull down |
| xapA  | prs | pull down |
| xerC  | prs | pull down |
| xerD  | prs | pull down |
| yafN  | prs | pull down |
| yahB  | prs | pull down |
| yahD  | prs | pull down |
| yahF  | prs | pull down |
| ybaQ  | prs | pull down |
| ybhO  | prs | pull down |
| yceG  | prs | pull down |
| ycfD  | prs | pull down |
| ycil  | prs | pull down |
| ycjZ  | prs | pull down |
| ydaT  | prs | pull down |
| ydcS  | prs | pull down |
| ydhW  | prs | pull down |
| ydiA  | prs | pull down |
| ydiV  | prs | pull down |

|      |      |                                                   |
|------|------|---------------------------------------------------|
| ydjF | prs  | pull down                                         |
| yeaK | prs  | pull down                                         |
| yeaM | prs  | pull down                                         |
| yebC | prs  | pull down                                         |
| yfeS | prs  | pull down                                         |
| yfhR | prs  | pull down                                         |
| yfiE | prs  | pull down                                         |
| yfjK | prs  | pull down                                         |
| yfjR | prs  | pull down                                         |
| ygbJ | prs  | pull down                                         |
| yhaK | prs  | pull down                                         |
| yidL | prs  | pull down                                         |
| yneJ | prs  | pull down                                         |
| ypjB | prs  | pull down                                         |
| yqiB | prs  | pull down                                         |
| pepP | pykF | pull down                                         |
| gltA | pykF | comigration in non denaturing gel electrophoresis |
| fumC | pykF | pull down                                         |
| pflB | pykA | pull down                                         |
| trxA | pykA | tandem affinity purification                      |
| usg  | pykA | pull down                                         |
| lepB | lepB | blue native page                                  |
| glnD | lepA | pull down                                         |
| yciU | lepA | pull down                                         |
| helD | lipA | pull down                                         |
| murC | lipA | pull down                                         |
| sucA | lipA | pull down                                         |
| sucB | lipA | pull down                                         |
| fepB | lldD | pull down                                         |
| yfgL | lldD | pull down                                         |
| yigA | lldD | pull down                                         |
| yihU | lldD | pull down                                         |
| zntA | lon  | pull down                                         |
| cbpA | lon  | pull down                                         |
| groL | lon  | pull down                                         |
| citC | lon  | pull down                                         |

|      |     |           |
|------|-----|-----------|
| clpP | lon | pull down |
| clpS | lon | pull down |
| cyoA | lon | pull down |
| djIC | lon | pull down |
| dnaK | lon | pull down |
| dnaQ | lon | pull down |
| dps  | lon | pull down |
| dxs  | lon | pull down |
| nfo  | lon | pull down |
| entB | lon | pull down |
| era  | lon | pull down |
| fabZ | lon | pull down |
| fldA | lon | pull down |
| flgG | lon | pull down |
| grpE | lon | pull down |
| hfq  | lon | pull down |
| holC | lon | pull down |
| hslU | lon | pull down |
| lolA | lon | pull down |
| lsrK | lon | pull down |
| moaD | lon | pull down |
| narY | lon | pull down |
| pbpC | lon | pull down |
| purL | lon | pull down |
| rfaY | lon | pull down |
| rlmE | lon | pull down |
| rlmN | lon | pull down |
| rpoC | lon | pull down |
| secB | lon | pull down |
| secB | lon | pull down |
| smg  | lon | pull down |
| ffh  | lon | pull down |
| sspB | lon | pull down |
| sbp  | lon | pull down |
| sufS | lon | pull down |
| yajO | lon | pull down |
| ybdG | lon | pull down |
| ybhB | lon | pull down |
| ybjD | lon | pull down |
| ycgF | lon | pull down |
| ycjX | lon | pull down |
| ydjF | lon | pull down |
| ygeV | lon | pull down |
| yhbU | lon | pull down |
| yjeP | lon | pull down |

|      |      |                                                   |
|------|------|---------------------------------------------------|
| ylbF | lon  | pull down                                         |
| lpp  | lpp  | blue native page                                  |
| lpxD | lpxA | pull down                                         |
| rnhB | lpxA | pull down                                         |
| zapA | lpxA | pull down                                         |
| fkpA | lpxB | pull down                                         |
| iscS | lpxB | pull down                                         |
| acpP | lpxD | pull down                                         |
| acpP | lpxD | pull down                                         |
| ligA | lpxD | pull down                                         |
| hfq  | lpxD | pull down                                         |
| proA | lpxD | pull down                                         |
| folA | lrp  | pull down                                         |
| eutP | lrp  | pull down                                         |
| msrA | lrp  | pull down                                         |
| oppF | lrp  | pull down                                         |
| sspB | lrp  | pull down                                         |
| upp  | lrp  | pull down                                         |
| tig  | luxS | pull down                                         |
| yjjV | luxS | pull down                                         |
| uxaA | arrD | pull down                                         |
| ycgY | arrD | pull down                                         |
| radA | lysR | pull down                                         |
| ulaR | lysR | pull down                                         |
| groS | malE | fluorescent resonance energy transfer             |
| groS | malE | fluorescent resonance energy transfer             |
| groL | malE | fluorescence polarization spectroscopy            |
| groL | malE | fluorescence correlation spectroscopy             |
| groL | malE | fluorescent resonance energy transfer             |
| dnaJ | malE | classical fluorescence spectroscopy               |
| osmC | malE | pull down                                         |
| talB | malE | comigration in non denaturing gel electrophoresis |



|      |      |                              |
|------|------|------------------------------|
| trxA | malE | tandem affinity purification |
| ftsZ | malK | pull down                    |
| gyrA | malK | pull down                    |
| ibpA | malK | pull down                    |
| ibpA | malK | pull down                    |
| ibpB | malK | pull down                    |
| mreB | malK | pull down                    |
| hupA | malQ | pull down                    |
| hupB | malQ | pull down                    |
| hupB | malQ | pull down                    |
| hns  | malQ | pull down                    |
| mtlR | malQ | pull down                    |
| rpsB | malQ | pull down                    |
| vsr  | malQ | pull down                    |
| acpP | malT | pull down                    |
| dnaJ | malT | pull down                    |
| gatY | malT | pull down                    |
| ibpA | malT | pull down                    |
| ibpB | malT | pull down                    |
| mreB | malT | pull down                    |
| murG | malT | pull down                    |
| ybeZ | malT | pull down                    |
| rihA | malT | pull down                    |
| rlmN | malT | pull down                    |
| adhP | aceB | pull down                    |
| araD | aceB | pull down                    |
| atoB | aceB | pull down                    |
| glgX | aceB | pull down                    |
| tgt  | aceB | pull down                    |
| clpB | glcB | pull down                    |
| rnfC | glcB | pull down                    |
| yfcZ | glcB | pull down                    |
| yfdZ | glcB | pull down                    |
| yiiS | glcB | pull down                    |
| appY | hyaB | pull down                    |

|      |      |                  |
|------|------|------------------|
| hybG | hyaB | pull down        |
| fadD | hyaB | pull down        |
| hybO | hyaB | blue native page |
| pyrD | hyaB | pull down        |
| rsmC | hyaB | pull down        |
| yhhI | hyaB | pull down        |

|      |     |                   |
|------|-----|-------------------|
| groL | mdh | molecular sieving |
| mnmE | mdh | pull down         |
| ycgL | mdh | pull down         |

|      |      |                  |
|------|------|------------------|
| corA | mdtE | pull down        |
| mdtE | mdtE | blue native page |
| mdtE | mdtE | blue native page |

|      |      |           |
|------|------|-----------|
| pheT | mdtO | pull down |
| ycgL | mdtO | pull down |

|      |      |           |
|------|------|-----------|
| menH | menB | pull down |
| rplC | menB | pull down |

|      |      |           |
|------|------|-----------|
| fadB | metE | pull down |
| gabT | metE | pull down |
| greA | metE | pull down |
| hslU | metE | pull down |
| uvrD | metE | pull down |
| yaaX | metE | pull down |
| yjeE | metE | pull down |

|      |      |           |
|------|------|-----------|
| corC | metH | pull down |
| dppF | metH | pull down |
| dut  | metH | pull down |
| hisD | metH | pull down |
| prpB | metH | pull down |
| recR | metH | pull down |
| rpoC | metH | pull down |
| yddH | metH | pull down |
| yjdA | metH | pull down |

|      |      |                  |
|------|------|------------------|
| cbpA | metK | pull down        |
| cheA | metK | two hybrid array |

|      |      |                                                   |
|------|------|---------------------------------------------------|
| clpP | metK | pull down                                         |
| clpX | metK | pull down                                         |
| dnaJ | metK | pull down                                         |
| polA | metK | pull down                                         |
| tufA | metK | pull down                                         |
| fabA | metK | pull down                                         |
| grpE | metK | pull down                                         |
| gyrA | metK | pull down                                         |
| gyrB | metK | pull down                                         |
| hslU | metK | pull down                                         |
| ibpA | metK | pull down                                         |
| ibpA | metK | pull down                                         |
| kdsA | metK | pull down                                         |
| malT | metK | pull down                                         |
| pnp  | metK | pull down                                         |
| rlmN | metK | pull down                                         |
| secA | metK | pull down                                         |
| ffh  | metK | pull down                                         |
| gadA | metQ | comigration in non denaturing gel electrophoresis |
| gadA | metQ | comigration in non denaturing gel electrophoresis |
| garL | mfd  | pull down                                         |
| rpoB | mfd  | two hybrid                                        |
| rpoB | mfd  | two hybrid                                        |
| rpoD | mfd  | pull down                                         |
| pheT | mfd  | pull down                                         |
| xylA | mfd  | pull down                                         |
| yddE | mfd  | pull down                                         |
| bolA | miaB | pull down                                         |
| mreB | miaB | pull down                                         |
| puuB | miaB | pull down                                         |
| manA | minC | pull down                                         |
| groS | minD | pull down                                         |
| cheW | minD | pull down                                         |
| fkpA | minD | pull down                                         |
| fliL | minD | pull down                                         |
| mreB | minD | pull down                                         |
| secA | minD | pull down                                         |
| ychJ | minD | pull down                                         |
| rhsE | minE | pull down                                         |

|      |      |           |
|------|------|-----------|
| yfjM | minE | pull down |
| ymfJ | minE | pull down |
| ynaE | minE | pull down |

|      |      |           |
|------|------|-----------|
| cheB | mngB | pull down |
| garL | mngB | pull down |
| hyaD | mngB | pull down |
| manB | mngB | pull down |
| mug  | mngB | pull down |
| osmC | mngB | pull down |
| queF | mngB | pull down |
| tusA | mngB | pull down |
| ychJ | mngB | pull down |
| ydfZ | mngB | pull down |

|      |      |           |
|------|------|-----------|
| moaE | moaA | pull down |
| ybhA | moaA | pull down |

|      |      |                  |
|------|------|------------------|
| dcrB | moaB | blue native page |
| moaC | moaB | pull down        |

|      |      |                                   |
|------|------|-----------------------------------|
| hemG | mobA | pull down                         |
| mobB | mobA | adenylate cyclase complementation |
| moeA | mobA | adenylate cyclase complementation |
| moeA | mobA | adenylate cyclase complementation |
| moeA | mobA | adenylate cyclase complementation |
| rfaH | mobA | pull down                         |

|      |      |                                   |
|------|------|-----------------------------------|
| iaaA | moeA | pull down                         |
| mobB | moeA | adenylate cyclase complementation |
| moeA | moeA | adenylate cyclase complementation |

|      |      |                  |
|------|------|------------------|
| metN | yehH | pull down        |
| relA | yehH | pull down        |
| rraA | yehH | pull down        |
| rpsO | yehH | pull down        |
| ydjA | yehH | pull down        |
| yhdH | yehH | pull down        |
| ylbA | yehH | pull down        |
|      |      |                  |
| gsk  | mpl  | pull down        |
| malY | mpl  | pull down        |
| yihI | mpl  | pull down        |
| yjgD | mpl  | pull down        |
|      |      |                  |
| cobU | mprA | pull down        |
|      |      |                  |
| mraZ | mraZ | two hybrid array |
| yjeF | mraZ | pull down        |
| yjeF | mraZ | pull down        |
|      |      |                  |
| groS | mreB | pull down        |
| cheW | mreB | pull down        |
| clpX | mreB | pull down        |
| dnaJ | mreB | pull down        |
| dxs  | mreB | pull down        |
| tufA | mreB | pull down        |
| erpA | mreB | pull down        |
| fkpB | mreB | pull down        |
| ftsA | mreB | pull down        |
| ftsZ | mreB | pull down        |
| grxA | mreB | pull down        |
| grxD | mreB | pull down        |
| gyrA | mreB | pull down        |
| hslU | mreB | pull down        |
| ibpA | mreB | pull down        |
| ibpB | mreB | pull down        |
| lpxB | mreB | pull down        |
| malT | mreB | pull down        |
| metK | mreB | pull down        |
| miaB | mreB | pull down        |
| narG | mreB | pull down        |
| nusG | mreB | pull down        |
| sucB | mreB | pull down        |
| oxaA | mreB | pull down        |
| parC | mreB | pull down        |

|      |      |                              |
|------|------|------------------------------|
| pnp  | mreB | pull down                    |
| prsA | mreB | pull down                    |
| pstB | mreB | pull down                    |
| recE | mreB | pull down                    |
| nrdA | mreB | pull down                    |
| nrdB | mreB | pull down                    |
| rlmN | mreB | pull down                    |
| rph  | mreB | pull down                    |
| rpoA | mreB | pull down                    |
| secA | mreB | pull down                    |
| trxA | mreB | tandem affinity purification |
| tig  | mreB | pull down                    |
| yacl | mreB | pull down                    |
| ycho | mreB | pull down                    |
| ydjF | mreB | pull down                    |
| yeaK | mreB | pull down                    |
| yeaM | mreB | pull down                    |
| ligA | mreC | pull down                    |
| ygiM | mreC | pull down                    |
| nfuA | mrp  | pull down                    |
| yggD | mrr  | pull down                    |
| ibpA | msbB | pull down                    |
| glmM | mscS | pull down                    |
| ppa  | msrA | pull down                    |
| iscA | msrA | pull down                    |
| fimD | mtlD | pull down                    |
| recJ | mtlD | pull down                    |
| selA | mtlD | pull down                    |
| stfQ | mtlD | pull down                    |
| ycbK | mtlD | pull down                    |
| ydeP | mtlD | pull down                    |
| ydfI | mtlD | pull down                    |
| sgcE | mtnN | pull down                    |
| pyrC | solA | pull down                    |
| cca  | mukE | pull down                    |

|      |      |                                   |
|------|------|-----------------------------------|
| mukB | mukE | pull down                         |
| mukB | mukE | pull down                         |
| cheB | mutS | pull down                         |
| fliJ | mutS | pull down                         |
| pykA | mutS | pull down                         |
| mutS | mutS | adenylate cyclase complementation |
| rihA | mutS | pull down                         |
| yecA | mutS | pull down                         |
| agp  | mutT | pull down                         |
| torA | mutT | pull down                         |
| alkA | nadE | pull down                         |
| gnd  | nadE | pull down                         |
| pgl  | nadE | pull down                         |
| aspC | nadE | pull down                         |
| accC | nadE | pull down                         |
| mhpF | nadE | pull down                         |
| acnA | nadE | pull down                         |
| acs  | nadE | pull down                         |
| ade  | nadE | pull down                         |
| adhE | nadE | pull down                         |
| aes  | nadE | pull down                         |
| melA | nadE | pull down                         |
| agaS | nadE | pull down                         |
| allB | nadE | pull down                         |
| allC | nadE | pull down                         |
| allD | nadE | pull down                         |
| amiA | nadE | pull down                         |
| pepP | nadE | pull down                         |
| anmK | nadE | pull down                         |
| appY | nadE | pull down                         |
| araB | nadE | pull down                         |
| araF | nadE | pull down                         |
| arcC | nadE | pull down                         |
| yahl | nadE | pull down                         |
| aroA | nadE | pull down                         |
| aroE | nadE | pull down                         |
| aroG | nadE | pull down                         |
| aroH | nadE | pull down                         |
| arsC | nadE | pull down                         |
| artP | nadE | pull down                         |
| asnB | nadE | pull down                         |

|      |      |           |
|------|------|-----------|
| aspA | nadE | pull down |
| astA | nadE | pull down |
| atoC | nadE | pull down |
| baeR | nadE | pull down |
| bcp  | nadE | pull down |
| betI | nadE | pull down |
| bglA | nadE | pull down |
| uidA | nadE | pull down |
| bioB | nadE | pull down |
| bioF | nadE | pull down |
| btuE | nadE | pull down |
| ybdK | nadE | pull down |
| can  | nadE | pull down |
| cbpA | nadE | pull down |
| cbrC | nadE | pull down |
| cca  | nadE | pull down |
| groS | nadE | pull down |
| cheA | nadE | pull down |
| cheB | nadE | pull down |
| cheW | nadE | pull down |
| cheY | nadE | pull down |
| gltA | nadE | pull down |
| clpA | nadE | pull down |
| clpB | nadE | pull down |
| clpS | nadE | pull down |
| clpX | nadE | pull down |
| cmoB | nadE | pull down |
| codA | nadE | pull down |
| corC | nadE | pull down |
| csdA | nadE | pull down |
| cspB | nadE | pull down |
| cspC | nadE | pull down |
| cspl | nadE | pull down |
| cusR | nadE | pull down |
| cutA | nadE | pull down |
| cysE | nadE | pull down |
| cysG | nadE | pull down |
| cysK | nadE | pull down |
| cysM | nadE | pull down |
| dapA | nadE | pull down |
| hupB | nadE | pull down |
| speF | nadE | pull down |
| ddlA | nadE | pull down |
| ddpD | nadE | pull down |
| deoC | nadE | pull down |



|      |      |           |
|------|------|-----------|
| mgIB | nadE | pull down |
| sdhA | nadE | pull down |
| dinD | nadE | pull down |
| dinG | nadE | pull down |
| dmsB | nadE | pull down |
| dnaA | nadE | pull down |
| dsbC | nadE | pull down |
| edd  | nadE | pull down |
| fusA | nadE | pull down |
| nei  | nadE | pull down |
| eno  | nadE | pull down |
| entB | nadE | pull down |
| entC | nadE | pull down |
| entE | nadE | pull down |
| eutC | nadE | pull down |
| eutD | nadE | pull down |
| fabD | nadE | pull down |
| fabH | nadE | pull down |
| fadB | nadE | pull down |
| frc  | nadE | pull down |
| fdhE | nadE | pull down |
| fdoG | nadE | pull down |
| fpr  | nadE | pull down |
| fepB | nadE | pull down |
| fepC | nadE | pull down |
| fixA | nadE | pull down |
| fixX | nadE | pull down |
| fldB | nadE | pull down |
| flgB | nadE | pull down |
| flgE | nadE | pull down |
| flgF | nadE | pull down |
| flgG | nadE | pull down |
| flhD | nadE | pull down |
| fliC | nadE | pull down |
| fliG | nadE | pull down |
| fliJ | nadE | pull down |
| fliK | nadE | pull down |
| fliS | nadE | pull down |
| flxA | nadE | pull down |
| fnr  | nadE | pull down |
| folC | nadE | pull down |
| folD | nadE | pull down |
| fre  | nadE | pull down |
| frlD | nadE | pull down |
| fruR | nadE | pull down |

|      |      |           |
|------|------|-----------|
| ftnB | nadE | pull down |
| fucO | nadE | pull down |
| fumA | nadE | pull down |
| fur  | nadE | pull down |
| gabT | nadE | pull down |
| galT | nadE | pull down |
| galE | nadE | pull down |
| galF | nadE | pull down |
| galM | nadE | pull down |
| garL | nadE | pull down |
| gatD | nadE | pull down |
| gatR | nadE | pull down |
| gcvP | nadE | pull down |
| glf  | nadE | pull down |
| glk  | nadE | pull down |
| glnB | nadE | pull down |
| glnD | nadE | pull down |
| glpD | nadE | pull down |
| glpX | nadE | pull down |
| grxA | nadE | pull down |
| grxD | nadE | pull down |
| glxR | nadE | pull down |
| gpsA | nadE | pull down |
| gph  | nadE | pull down |
| gpmA | nadE | pull down |
| gpml | nadE | pull down |
| greA | nadE | pull down |
| greB | nadE | pull down |
| grpE | nadE | pull down |
| gshB | nadE | pull down |
| gor  | nadE | pull down |
| gsp  | nadE | pull down |
| guaA | nadE | pull down |
| gudD | nadE | pull down |
| hcaD | nadE | pull down |
| hchA | nadE | pull down |
| hemF | nadE | pull down |
| hinT | nadE | pull down |
| hmp  | nadE | pull down |
| holB | nadE | pull down |
| holE | nadE | pull down |
| hyaE | nadE | pull down |
| hyaF | nadE | pull down |
| hyi  | nadE | pull down |
| icd  | nadE | pull down |

|      |      |           |
|------|------|-----------|
| infA | nadE | pull down |
| ihfA | nadE | pull down |
| gsk  | nadE | pull down |
| iraP | nadE | pull down |
| iscS | nadE | pull down |
| katG | nadE | pull down |
| kbaY | nadE | pull down |
| cmk  | nadE | pull down |
| kdsB | nadE | pull down |
| kduI | nadE | pull down |
| pykF | nadE | pull down |
| ldhA | nadE | pull down |
| leuA | nadE | pull down |
| lipA | nadE | pull down |
| lon  | nadE | pull down |
| lptC | nadE | pull down |
| lrp  | nadE | pull down |
| lsrG | nadE | pull down |
| lsrK | nadE | pull down |
| ltaE | nadE | pull down |
| manA | nadE | pull down |
| manB | nadE | pull down |
| maeB | nadE | pull down |
| hybC | nadE | pull down |
| hybO | nadE | pull down |
| menB | nadE | pull down |
| menC | nadE | pull down |
| menE | nadE | pull down |
| menF | nadE | pull down |
| metB | nadE | pull down |
| metK | nadE | pull down |
| mhpB | nadE | pull down |
| mhpD | nadE | pull down |
| minE | nadE | pull down |
| mliC | nadE | pull down |
| mmuM | nadE | pull down |
| mnmA | nadE | pull down |
| moaA | nadE | pull down |
| moaC | nadE | pull down |
| moaD | nadE | pull down |
| moaE | nadE | pull down |
| moeA | nadE | pull down |
| moeB | nadE | pull down |
| yedP | nadE | pull down |
| mrp  | nadE | pull down |

|      |      |           |
|------|------|-----------|
| mtfA | nadE | pull down |
| murA | nadE | pull down |
| murE | nadE | pull down |
| murF | nadE | pull down |
| murR | nadE | pull down |
| nadA | nadE | pull down |
| nagA | nadE | pull down |
| nagB | nadE | pull down |
| nagK | nadE | pull down |
| nanA | nadE | pull down |
| narH | nadE | pull down |
| narW | nadE | pull down |
| nfuA | nadE | pull down |
| nhoA | nadE | pull down |
| nlpA | nadE | pull down |
| nlpB | nadE | pull down |
| nohB | nadE | pull down |
| norV | nadE | pull down |
| nrdD | nadE | pull down |
| nrdH | nadE | pull down |
| nrdR | nadE | pull down |
| nrfB | nadE | pull down |
| nrfG | nadE | pull down |
| nudB | nadE | pull down |
| nudG | nadE | pull down |
| nusB | nadE | pull down |
| oppF | nadE | pull down |
| osmF | nadE | pull down |
| argI | nadE | pull down |
| otsB | nadE | pull down |
| oxc  | nadE | pull down |
| proC | nadE | pull down |
| paaB | nadE | pull down |
| panE | nadE | pull down |
| pdxB | nadE | pull down |
| pepT | nadE | pull down |
| pflA | nadE | pull down |
| pflB | nadE | pull down |
| pgm  | nadE | pull down |
| phoB | nadE | pull down |
| phoP | nadE | pull down |
| pncB | nadE | pull down |
| poxB | nadE | pull down |
| pptA | nadE | pull down |
| ppx  | nadE | pull down |

|       |      |           |
|-------|------|-----------|
| prmA  | nadE | pull down |
| prpB  | nadE | pull down |
| prpC  | nadE | pull down |
| prpD  | nadE | pull down |
| psuG  | nadE | pull down |
| psuK  | nadE | pull down |
| ptsl  | nadE | pull down |
| pta   | nadE | pull down |
| frwB  | nadE | pull down |
| ptrA  | nadE | pull down |
| purB  | nadE | pull down |
| purH  | nadE | pull down |
| purE  | nadE | pull down |
| purK  | nadE | pull down |
| purT  | nadE | pull down |
| puuB  | nadE | pull down |
| pyrC  | nadE | pull down |
| pyrG  | nadE | pull down |
| qorB  | nadE | pull down |
| queA  | nadE | pull down |
| racR  | nadE | pull down |
| rbfA  | nadE | pull down |
| rbsB  | nadE | pull down |
| recA  | nadE | pull down |
| recG  | nadE | pull down |
| relB  | nadE | pull down |
| prfA  | nadE | pull down |
| rfaH  | nadE | pull down |
| rhIE  | nadE | pull down |
| rhmD  | nadE | pull down |
| ribD  | nadE | pull down |
| ribF  | nadE | pull down |
| rihA  | nadE | pull down |
| rihB  | nadE | pull down |
| rimO  | nadE | pull down |
| rplK  | nadE | pull down |
| rpmA  | nadE | pull down |
| rpmC  | nadE | pull down |
| rlmL  | nadE | pull down |
| rlmN  | nadE | pull down |
| rluF  | nadE | pull down |
| rmIA1 | nadE | pull down |
| rfbB  | nadE | pull down |
| rnb   | nadE | pull down |
| rnk   | nadE | pull down |

|      |      |           |
|------|------|-----------|
| rpoD | nadE | pull down |
| rpsO | nadE | pull down |
| rpsP | nadE | pull down |
| rsmC | nadE | pull down |
| rumB | nadE | pull down |
| rutA | nadE | pull down |
| rutC | nadE | pull down |
| ruvA | nadE | pull down |
| sbcD | nadE | pull down |
| dsdA | nadE | pull down |
| selD | nadE | pull down |
| serB | nadE | pull down |
| serC | nadE | pull down |
| yeiG | nadE | pull down |
| smtA | nadE | pull down |
| speA | nadE | pull down |
| speB | nadE | pull down |
| spr  | nadE | pull down |
| ssuD | nadE | pull down |
| sbp  | nadE | pull down |
| sufA | nadE | pull down |
| sufE | nadE | pull down |
| suhB | nadE | pull down |
| supH | nadE | pull down |
| cysS | nadE | pull down |
| aspS | nadE | pull down |
| lysS | nadE | pull down |
| asnS | nadE | pull down |
| thrS | nadE | pull down |
| trpS | nadE | pull down |
| tyrS | nadE | pull down |
| hsdM | nadE | pull down |
| talA | nadE | pull down |
| tdh  | nadE | pull down |
| tesB | nadE | pull down |
| tgt  | nadE | pull down |
| thiF | nadE | pull down |
| thiL | nadE | pull down |
| tig  | nadE | pull down |
| tldD | nadE | pull down |
| treC | nadE | pull down |
| trpA | nadE | pull down |
| trpB | nadE | pull down |
| trpC | nadE | pull down |
| trpE | nadE | pull down |

|      |      |           |
|------|------|-----------|
| trxB | nadE | pull down |
| tusA | nadE | pull down |
| ubiF | nadE | pull down |
| uspF | nadE | pull down |
| uup  | nadE | pull down |
| uxaB | nadE | pull down |
| uxaC | nadE | pull down |
| uxuA | nadE | pull down |
| uxuB | nadE | pull down |
| xisE | nadE | pull down |
| wbbJ | nadE | pull down |
| wcaA | nadE | pull down |
| xapA | nadE | pull down |
| yacF | nadE | pull down |
| yafP | nadE | pull down |
| yagT | nadE | pull down |
| yahD | nadE | pull down |
| yahE | nadE | pull down |
| yahG | nadE | pull down |
| yahJ | nadE | pull down |
| yahK | nadE | pull down |
| yaiA | nadE | pull down |
| yaiL | nadE | pull down |
| yajO | nadE | pull down |
| ybaB | nadE | pull down |
| ybaK | nadE | pull down |
| ybbA | nadE | pull down |
| ybcO | nadE | pull down |
| ybdB | nadE | pull down |
| ybdD | nadE | pull down |
| ybdH | nadE | pull down |
| ybdL | nadE | pull down |
| ybdM | nadE | pull down |
| ybeD | nadE | pull down |
| ybeL | nadE | pull down |
| ybgL | nadE | pull down |
| ybhK | nadE | pull down |
| ybhO | nadE | pull down |
| ybiA | nadE | pull down |
| ybil | nadE | pull down |
| yccJ | nadE | pull down |
| ycdO | nadE | pull down |
| ycdX | nadE | pull down |
| ycfH | nadE | pull down |
| ycgL | nadE | pull down |

|       |      |           |
|-------|------|-----------|
| ycgR  | nadE | pull down |
| ycho  | nadE | pull down |
| yciA  | nadE | pull down |
| yciE  | nadE | pull down |
| yciG  | nadE | pull down |
| ycil  | nadE | pull down |
| yciN  | nadE | pull down |
| yciT  | nadE | pull down |
| ycjW  | nadE | pull down |
| ydaE  | nadE | pull down |
| ydaS  | nadE | pull down |
| ydaY  | nadE | pull down |
| yddE  | nadE | pull down |
| ydfG  | nadE | pull down |
| ydfX  | nadE | pull down |
| ydfZ  | nadE | pull down |
| ydhQ  | nadE | pull down |
| ydhS  | nadE | pull down |
| ydhZ  | nadE | pull down |
| ydiE  | nadE | pull down |
| ydiS  | nadE | pull down |
| ydjJ  | nadE | pull down |
| yeaD  | nadE | pull down |
| yeaE  | nadE | pull down |
| yeaG  | nadE | pull down |
| yeaK  | nadE | pull down |
| yeaO  | nadE | pull down |
| yeaR  | nadE | pull down |
| yebC  | nadE | pull down |
| yebG  | nadE | pull down |
| yecF  | nadE | pull down |
| yechH | nadE | pull down |
| yecJ  | nadE | pull down |
| yedF  | nadE | pull down |
| yedK  | nadE | pull down |
| yedN  | nadE | pull down |
| yeeU  | nadE | pull down |
| yeeV  | nadE | pull down |
| yegL  | nadE | pull down |
| yegS  | nadE | pull down |
| yegU  | nadE | pull down |
| yegV  | nadE | pull down |
| yejG  | nadE | pull down |
| yfcL  | nadE | pull down |
| yfcU  | nadE | pull down |



|      |      |           |
|------|------|-----------|
| yfdE | nadE | pull down |
| yfdZ | nadE | pull down |
| yfeX | nadE | pull down |
| yfgD | nadE | pull down |
| yfhA | nadE | pull down |
| yfhL | nadE | pull down |
| ygaD | nadE | pull down |
| ygck | nadE | pull down |
| ygdK | nadE | pull down |
| ygfZ | nadE | pull down |
| yggW | nadE | pull down |
| ygiF | nadE | pull down |
| ygiN | nadE | pull down |
| yhbY | nadE | pull down |
| yhcC | nadE | pull down |
| yhcO | nadE | pull down |
| yheU | nadE | pull down |
| yhfS | nadE | pull down |
| yhiN | nadE | pull down |
| yhiR | nadE | pull down |
| yihT | nadE | pull down |
| yihU | nadE | pull down |
| yiiS | nadE | pull down |
| yjaA | nadE | pull down |
| yjbJ | nadE | pull down |
| yjcF | nadE | pull down |
| yjeE | nadE | pull down |
| yjgR | nadE | pull down |
| yjjK | nadE | pull down |
| ylbA | nadE | pull down |
| ymjA | nadE | pull down |
| ynaK | nadE | pull down |
| yobA | nadE | pull down |
| yobB | nadE | pull down |
| yohF | nadE | pull down |
| ypdE | nadE | pull down |
| yqjG | nadE | pull down |
| yraN | nadE | pull down |
| yrbA | nadE | pull down |
| yrbB | nadE | pull down |
| ade  | nagC | pull down |
| cheZ | nagC | pull down |
| cyoA | nagC | pull down |
| fepB | nagC | pull down |

|      |      |                       |
|------|------|-----------------------|
| gltF | nanA | pull down             |
| yaiA | nanA | pull down             |
| iciA | nanR | pull down             |
| fabF | napG | pull down             |
| narP | napG | pull down             |
| thiC | napG | pull down             |
| uxaB | napG | pull down             |
| groL | narG | pull down             |
| clpP | narG | pull down             |
| dnaJ | narG | pull down             |
| hscC | narG | pull down             |
| hslU | narG | pull down             |
| mreB | narG | pull down             |
| narH | narG | blue native page      |
| narH | narG | pull down             |
| narH | narG | pull down             |
| narJ | narG | pull down             |
| narJ | narG | pull down             |
| narW | narG | pull down             |
| narW | narG | pull down             |
| narY | narG | pull down             |
| narZ | narG | pull down             |
| pstB | narG | pull down             |
| purL | narG | pull down             |
| rph  | narG | pull down             |
| uvrA | narG | pull down             |
| fixC | narH | pull down             |
| gcl  | narH | pull down             |
| narG | narH | x-ray crystallography |
| narG | narH | x-ray crystallography |
| narG | narH | x-ray crystallography |
| narG | narH | x-ray crystallography |
| narG | narH | x-ray crystallography |
| narG | narH | x-ray crystallography |
| narJ | narH | pull down             |
| narJ | narH | pull down             |
| narW | narH | pull down             |
| narY | narH | pull down             |
| narZ | narH | pull down             |
| narZ | narH | pull down             |

|      |      |                  |
|------|------|------------------|
| psuK | narH | pull down        |
| narG | narJ | pull down        |
| narG | narJ | pull down        |
| eutP | narL | pull down        |
| nudK | narL | pull down        |
| cspA | nfnB | pull down        |
| damX | nfnB | pull down        |
| hupB | nfnB | pull down        |
| degS | nfnB | pull down        |
| mcrA | nfnB | pull down        |
| chbA | nfnB | pull down        |
| rhIE | nfnB | pull down        |
| rpsE | nfnB | pull down        |
| uppS | nfnB | pull down        |
| yjfF | nfnB | pull down        |
| yhiR | nfnB | pull down        |
| yneG | nfnB | pull down        |
| cheR | ydbK | two hybrid array |
| fhuF | ydbK | pull down        |
| mbhA | ydbK | two hybrid array |
| ydbK | ydbK | two hybrid array |
| nrdR | ydbK | pull down        |
| fixC | glnG | pull down        |
| lldD | glnG | pull down        |
| glnL | glnG | two hybrid       |
| glnL | glnG | two hybrid       |
| glnG | glnG | two hybrid       |
| pqqL | glnG | pull down        |

|      |      |                  |
|------|------|------------------|
| rhsE | glnG | pull down        |
| tig  | nudC | pull down        |
| moeB | nudK | pull down        |
| hslU | nuoC | pull down        |
| mreB | nuoC | pull down        |
| rlmN | nuoC | pull down        |
| fes  | nuoF | pull down        |
| malY | nuoF | pull down        |
| nuoE | nuoF | pull down        |
| asmA | nuoG | pull down        |
| bioA | nuoG | pull down        |
| groL | nuoG | pull down        |
| cysB | nuoG | pull down        |
| fliJ | nuoG | pull down        |
| gatD | nuoG | pull down        |
| gudD | nuoG | pull down        |
| hscC | nuoG | pull down        |
| hyaD | nuoG | pull down        |
| kduD | nuoG | pull down        |
| lsrK | nuoG | pull down        |
| mprA | nuoG | pull down        |
| msbB | nuoG | pull down        |
| napD | nuoG | pull down        |
| nfuA | nuoG | pull down        |
| nuoC | nuoG | blue native page |
| nuoE | nuoG | pull down        |
| nuoF | nuoG | pull down        |
| argS | nuoG | pull down        |
| thiD | nuoG | pull down        |
| trpH | nuoG | pull down        |
| yacl | nuoG | pull down        |
| ybeR | nuoG | pull down        |
| yegQ | nuoG | pull down        |
| yehK | nuoG | pull down        |
| yjeJ | nuoG | pull down        |
| ymdB | nuoG | pull down        |

|      |      |           |
|------|------|-----------|
| yqgE | nucG | pull down |
| zwf  | nusA | pull down |
| ihfB | nusA | pull down |
| rapA | nusA | pull down |
| rpoA | nusA | pull down |
| rpoA | nusA | pull down |
| rpoB | nusA | pull down |
| rpoB | nusA | pull down |
| rpoC | nusA | pull down |
| rpoD | nusA | pull down |
| rpoD | nusA | pull down |
| rpoZ | nusA | pull down |
| yacl | nusA | pull down |
| rpsJ | nusB | pull down |
| rpsJ | nusB | pull down |
| rpsJ | nusB | pull down |
| adiA | sucA | pull down |
| uvrC | sucA | pull down |
| ycbL | sucA | pull down |
| yheS | sucA | pull down |
| pepA | sucB | pull down |
| bioH | sucB | pull down |
| dcyD | sucB | pull down |
| dcyD | sucB | pull down |
| dnaJ | sucB | pull down |
| fabA | sucB | pull down |
| lasT | sucB | pull down |
| livK | sucB | pull down |
| lpxC | sucB | pull down |
| nusG | sucB | pull down |
| ppiD | sucB | pull down |
| sucC | sucB | pull down |
| tyrS | sucB | pull down |
| tig  | sucB | pull down |
| uvrC | sucB | pull down |
| ybaP | sucB | pull down |
| ybhB | sucB | pull down |
| ybhC | sucB | pull down |
| ycbB | sucB | pull down |
| ycgF | sucB | pull down |
| ydjF | sucB | pull down |

|      |      |                                                   |
|------|------|---------------------------------------------------|
| ydjI | sucB | pull down                                         |
| yfcL | sucB | pull down                                         |
| yhhW | sucB | pull down                                         |
| yraN | sucB | pull down                                         |
| frdA | aceE | comigration in non denaturing gel electrophoresis |
| ompW | aceE | anti bait coimmunoprecipitation                   |
| acpP | aceE | pull down                                         |
| tynA | aceE | pull down                                         |
| araA | aceE | pull down                                         |
| cedA | aceE | pull down                                         |
| cheY | aceE | pull down                                         |
| cheY | aceE | pull down                                         |
| clpP | aceE | pull down                                         |
| cmoB | aceE | pull down                                         |
| cspB | aceE | pull down                                         |
| cspD | aceE | pull down                                         |
| deaD | aceE | pull down                                         |
| deaD | aceE | pull down                                         |
| lpdA | aceE | pull down                                         |
| dam  | aceE | pull down                                         |
| dnaB | aceE | pull down                                         |
| dnaJ | aceE | pull down                                         |
| ligA | aceE | pull down                                         |
| dusC | aceE | pull down                                         |
| dxs  | aceE | pull down                                         |
| fdhD | aceE | pull down                                         |
| fdnG | aceE | pull down                                         |
| fdnG | aceE | pull down                                         |
| ftsA | aceE | pull down                                         |
| ftsK | aceE | pull down                                         |
| fumB | aceE | pull down                                         |
| gcp  | aceE | pull down                                         |
| greA | aceE | pull down                                         |
| hns  | aceE | pull down                                         |
| holB | aceE | pull down                                         |
| hrpA | aceE | pull down                                         |
| hycl | aceE | pull down                                         |
| ilvB | aceE | pull down                                         |
| ilvB | aceE | pull down                                         |
| cadA | aceE | pull down                                         |
| lolA | aceE | pull down                                         |
| mnmE | aceE | pull down                                         |
| mnmE | aceE | pull down                                         |
| msbB | aceE | pull down                                         |

|      |      |           |
|------|------|-----------|
| napA | aceE | pull down |
| nikD | aceE | pull down |
| nudB | aceE | pull down |
| nudK | aceE | pull down |
| nusA | aceE | pull down |
| ogt  | aceE | pull down |
| pdhR | aceE | pull down |
| ybeZ | aceE | pull down |
| proA | aceE | pull down |
| puuB | aceE | pull down |
| recE | aceE | pull down |
| recJ | aceE | pull down |
| recQ | aceE | pull down |
| relA | aceE | pull down |
| rhlB | aceE | pull down |
| ribF | aceE | pull down |
| rlmN | aceE | pull down |
| rluB | aceE | pull down |
| rluC | aceE | pull down |
| rnhA | aceE | pull down |
| rpoA | aceE | pull down |
| rsgA | aceE | pull down |
| rsmG | aceE | pull down |
| rsmG | aceE | pull down |
| ruvB | aceE | pull down |
| selB | aceE | pull down |
| stfR | aceE | pull down |
| sbp  | aceE | pull down |
| proS | aceE | pull down |
| argS | aceE | pull down |
| tgt  | aceE | pull down |
| tig  | aceE | pull down |
| trmA | aceE | pull down |
| trmB | aceE | pull down |
| trpE | aceE | pull down |
| tusA | aceE | pull down |
| ubiC | aceE | pull down |
| uvrC | aceE | pull down |
| uvrD | aceE | pull down |
| ybhF | aceE | pull down |
| ybhF | aceE | pull down |
| ybhK | aceE | pull down |
| ycgF | aceE | pull down |
| ycgF | aceE | pull down |
| yciU | aceE | pull down |

|      |      |           |
|------|------|-----------|
| yciU | aceE | pull down |
| ycjY | aceE | pull down |
| ydaM | aceE | pull down |
| ydbA | aceE | pull down |
| ydhW | aceE | pull down |
| ydiA | aceE | pull down |
| yfjK | aceE | pull down |
| ygcB | aceE | pull down |
| ygiF | aceE | pull down |
| yhbU | aceE | pull down |
| yhiR | aceE | pull down |
| poxA | aceE | pull down |
| ynfB | aceE | pull down |
| yoaA | aceE | pull down |
| yraN | aceE | pull down |
| znuC | aceE | pull down |

|      |      |                  |
|------|------|------------------|
| acpP | aceF | pull down        |
| aidB | aceF | pull down        |
| aidB | aceF | pull down        |
| cedA | aceF | pull down        |
| cedA | aceF | pull down        |
| cheY | aceF | pull down        |
| cheY | aceF | pull down        |
| cspB | aceF | pull down        |
| dcm  | aceF | pull down        |
| lpdA | aceF | blue native page |
| fadJ | aceF | pull down        |
| fdhD | aceF | pull down        |
| fimB | aceF | pull down        |
| gyrA | aceF | pull down        |
| hrpA | aceF | pull down        |
| hrpB | aceF | pull down        |
| iclR | aceF | pull down        |
| intA | aceF | pull down        |
| intA | aceF | pull down        |
| intS | aceF | pull down        |
| intS | aceF | pull down        |
| napD | aceF | pull down        |
| narJ | aceF | pull down        |
| nfi  | aceF | pull down        |
| nfi  | aceF | pull down        |
| ogt  | aceF | pull down        |
| paaJ | aceF | pull down        |
| paaX | aceF | pull down        |



|      |      |           |
|------|------|-----------|
| parC | aceF | pull down |
| pdhR | aceF | pull down |
| ybeZ | aceF | pull down |
| ybeZ | aceF | pull down |
| malP | aceF | pull down |
| malP | aceF | pull down |
| pinR | aceF | pull down |
| pinR | aceF | pull down |
| ppk  | aceF | pull down |
| qmcA | aceF | pull down |
| recG | aceF | pull down |
| recJ | aceF | pull down |
| recQ | aceF | pull down |
| recQ | aceF | pull down |
| rlmE | aceF | pull down |
| rlmN | aceF | pull down |
| rluC | aceF | pull down |
| rnhA | aceF | pull down |
| rnhA | aceF | pull down |
| rnpA | aceF | pull down |
| rnt  | aceF | pull down |
| rpoA | aceF | pull down |
| rsmG | aceF | pull down |
| rsml | aceF | pull down |
| selB | aceF | pull down |
| tadA | aceF | pull down |
| tgt  | aceF | pull down |
| tyrR | aceF | pull down |
| ubiC | aceF | pull down |
| ulaR | aceF | pull down |
| uvrB | aceF | pull down |
| uvrB | aceF | pull down |
| uvrD | aceF | pull down |
| ybcJ | aceF | pull down |
| ybcJ | aceF | pull down |
| ybhF | aceF | pull down |
| ybjX | aceF | pull down |
| yceA | aceF | pull down |
| ycgF | aceF | pull down |
| yciU | aceF | pull down |
| ydaM | aceF | pull down |
| ygiF | aceF | pull down |
| yhbU | aceF | pull down |
| yibL | aceF | pull down |
| poxA | aceF | pull down |

|      |      |                              |
|------|------|------------------------------|
| yjeF | aceF | pull down                    |
| yjeF | aceF | pull down                    |
| yjgD | aceF | pull down                    |
| yraN | aceF | pull down                    |
| znuC | aceF | pull down                    |
| arrD | ompA | pull down                    |
| mreB | ompA | pull down                    |
| narJ | ompA | pull down                    |
| ompA | ompA | blue native page             |
| pepB | ompA | pull down                    |
| trxA | ompA | tandem affinity purification |
| tig  | ompA | pull down                    |
| tig  | ompA | pull down                    |
| ttdA | ompA | pull down                    |
| ygiF | ompA | pull down                    |
| ygiF | ompA | pull down                    |
| ibpA | ompC | pull down                    |
| mreB | ompC | pull down                    |
| rlmN | ompC | pull down                    |
| trxA | ompC | tandem affinity purification |
| ygiF | ompC | pull down                    |
| kefG | ompR | pull down                    |
| rbsK | ompR | pull down                    |
| trxA | ompR | tandem affinity purification |
| yqjI | ompR | pull down                    |
| obgE | prlC | pull down                    |
| hisI | mdoG | pull down                    |
| tig  | mdoG | pull down                    |
| yfiF | osmF | pull down                    |

|      |      |                                                   |
|------|------|---------------------------------------------------|
| acpS | oxyR | pull down                                         |
| napA | panC | pull down                                         |
| panD | panC | pull down                                         |
| ycfD | panC | pull down                                         |
| yfcD | panC | pull down                                         |
| yfcD | panC | pull down                                         |
| mukB | parC | pull down                                         |
| parE | parC | pull down                                         |
| ssb  | parC | pull down                                         |
| smpB | parC | pull down                                         |
| ftsN | mrcB | pull down                                         |
| ftsN | mrcB | adenylate cyclase complementation                 |
| ftsN | mrcB | cross-linking study                               |
| poxB | mrcB | pull down                                         |
| rhaB | mrcB | pull down                                         |
| gnd  | pckA | comigration in non denaturing gel electrophoresis |
| artI | pdhR | pull down                                         |
| fixX | pdxA | pull down                                         |
| fkpB | pdxA | pull down                                         |
| atpA | pepB | pull down                                         |
| dnaK | pepB | pull down                                         |
| fimD | pepB | pull down                                         |
| holA | pepB | pull down                                         |
| hscA | pepB | pull down                                         |
| htpG | pepB | pull down                                         |
| kdsB | pepB | pull down                                         |
| murA | pepB | pull down                                         |
| pepE | pepB | pull down                                         |
| rdgB | pepB | pull down                                         |
| rpoD | pepB | pull down                                         |
| ydiA | pepB | pull down                                         |

|      |      |                  |
|------|------|------------------|
| yiiG | pepB | pull down        |
| gnd  | pepD | blue native page |
| accD | pepD | pull down        |
| arsC | pepD | pull down        |
| chpR | pepD | pull down        |
| hupB | pepD | pull down        |
| deoC | pepD | pull down        |
| dksA | pepD | pull down        |
| dut  | pepD | pull down        |
| entB | pepD | pull down        |
| eutK | pepD | pull down        |
| fdx  | pepD | pull down        |
| yggX | pepD | pull down        |
| flgM | pepD | pull down        |
| flgN | pepD | pull down        |
| flxA | pepD | pull down        |
| fucR | pepD | pull down        |
| zwf  | pepD | blue native page |
| gpmA | pepD | pull down        |
| grpE | pepD | pull down        |
| hoIE | pepD | pull down        |
| hscB | pepD | pull down        |
| hyaE | pepD | pull down        |
| idi  | pepD | pull down        |
| menB | pepD | pull down        |
| msyB | pepD | pull down        |
| mug  | pepD | pull down        |
| murR | pepD | pull down        |
| panE | pepD | pull down        |
| pmrD | pepD | pull down        |
| pncB | pepD | pull down        |
| prpB | pepD | pull down        |
| racR | pepD | pull down        |
| relB | pepD | pull down        |
| ribB | pepD | pull down        |
| rimN | pepD | pull down        |
| nrdF | pepD | pull down        |
| ssb  | pepD | pull down        |
| ssuD | pepD | pull down        |
| upp  | pepD | pull down        |
| ybil | pepD | pull down        |
| yceD | pepD | pull down        |
| ycgL | pepD | pull down        |
| yciG | pepD | pull down        |

|      |      |           |
|------|------|-----------|
| yciH | pepD | pull down |
| ydfZ | pepD | pull down |
| ydiZ | pepD | pull down |
| yeaK | pepD | pull down |
| yebG | pepD | pull down |
| yecJ | pepD | pull down |
| yeiR | pepD | pull down |
| yfaS | pepD | pull down |
| yfcF | pepD | pull down |
| yfcU | pepD | pull down |
| yfdK | pepD | pull down |
| yfjF | pepD | pull down |
| ygfY | pepD | pull down |
| yggS | pepD | pull down |
| yhdE | pepD | pull down |
| yidB | pepD | pull down |
| yjeJ | pepD | pull down |
| ymgA | pepD | pull down |
| yqgE | pepD | pull down |
| yrhB | pepD | pull down |

|      |      |           |
|------|------|-----------|
| hybC | pepQ | pull down |
| rluD | pepQ | pull down |

|      |      |                  |
|------|------|------------------|
| argD | pepT | blue native page |
| tpiA | pepT | pull down        |
| tpiA | pepT | pull down        |
| yggL | pepT | pull down        |

|      |      |           |
|------|------|-----------|
| amyA | pflA | pull down |
| frlD | pflA | pull down |
| hypB | pflA | pull down |
| kbaY | pflA | pull down |
| kil  | pflA | pull down |
| mobA | pflA | pull down |
| pabC | pflA | pull down |
| panB | pflA | pull down |
| ybgD | pflA | pull down |
| ybiA | pflA | pull down |
| ycbG | pflA | pull down |
| yeeV | pflA | pull down |
| yegL | pflA | pull down |
| yihU | pflA | pull down |
| ymgA | pflA | pull down |

|      |      |                                                   |
|------|------|---------------------------------------------------|
| mgtA | pflB | pull down                                         |
| ybdK | pflB | pull down                                         |
| cca  | pflB | pull down                                         |
| cyoA | pflB | pull down                                         |
| dxr  | pflB | pull down                                         |
| ftsZ | pflB | pull down                                         |
| gcvT | pflB | pull down                                         |
| grcA | pflB | pull down                                         |
| grcA | pflB | pull down                                         |
| grcA | pflB | pull down                                         |
| helD | pflB | pull down                                         |
| hscC | pflB | pull down                                         |
| ibpA | pflB | pull down                                         |
| ibpA | pflB | pull down                                         |
| tdk  | pflB | pull down                                         |
| pykF | pflB | pull down                                         |
| pykA | pflB | pull down                                         |
| leuD | pflB | pull down                                         |
| pepT | pflB | pull down                                         |
| pepT | pflB | pull down                                         |
| pepT | pflB | pull down                                         |
| ppiB | pflB | pull down                                         |
| racC | pflB | pull down                                         |
| rplD | pflB | pull down                                         |
| srlR | pflB | pull down                                         |
| sspA | pflB | pull down                                         |
| sufD | pflB | pull down                                         |
| lysU | pflB | pull down                                         |
| lysU | pflB | pull down                                         |
| tig  | pflB | pull down                                         |
| tpiA | pflB | pull down                                         |
| tpiA | pflB | pull down                                         |
| yajD | pflB | pull down                                         |
| ybdM | pflB | pull down                                         |
| ybil | pflB | pull down                                         |
| ycfD | pflB | pull down                                         |
| ydfZ | pflB | pull down                                         |
| yfcZ | pflB | pull down                                         |
| yiiS | pflB | pull down                                         |
| yjeE | pflB | pull down                                         |
| yjeJ | pflB | pull down                                         |
| ahpC | pgk  | comigration in non denaturing gel electrophoresis |
| helD | pgk  | pull down                                         |
| pnp  | pgk  | pull down                                         |

|      |     |                  |
|------|-----|------------------|
| manX | pgk | pull down        |
| lysU | pgk | pull down        |
| usg  | pgk | blue native page |

|      |     |                  |
|------|-----|------------------|
| accD | pgm | pull down        |
| dcp  | pgm | pull down        |
| zwf  | pgm | blue native page |
| ghrB | pgm | pull down        |
| rnr  | pgm | pull down        |
| yagR | pgm | pull down        |

|     |      |           |
|-----|------|-----------|
| rnz | ycjU | pull down |
|-----|------|-----------|

|      |      |           |
|------|------|-----------|
| intD | phnA | pull down |
| lpxD | phnA | pull down |

|      |      |           |
|------|------|-----------|
| trmB | ybeZ | pull down |
| ybeY | ybeZ | pull down |

|      |      |           |
|------|------|-----------|
| wrbA | phoP | pull down |
|------|------|-----------|

|      |      |           |
|------|------|-----------|
| hupA | malP | pull down |
| hupB | malP | pull down |
| hupB | malP | pull down |
| polA | malP | pull down |
| polA | malP | pull down |
| nfo  | malP | pull down |
| xthA | malP | pull down |
| hns  | malP | pull down |
| nfi  | malP | pull down |
| rnhA | malP | pull down |
| rpoC | malP | pull down |
| ssb  | malP | pull down |
| smpB | malP | pull down |
| hsdS | malP | pull down |
| topA | malP | pull down |
| uvrD | malP | pull down |

|      |      |           |
|------|------|-----------|
| accB | pmbA | pull down |
|------|------|-----------|

|      |      |                                    |
|------|------|------------------------------------|
| cspC | pnp  | pull down                          |
| cspD | pnp  | pull down                          |
| cspE | pnp  | pull down                          |
| eno  | pnp  | pull down                          |
| eno  | pnp  | pull down                          |
| hfq  | pnp  | pull down                          |
| ibpA | pnp  | pull down                          |
| ibpA | pnp  | pull down                          |
| mreB | pnp  | pull down                          |
| murE | pnp  | pull down                          |
| pgk  | pnp  | pull down                          |
| malP | pnp  | pull down                          |
| pssA | pnp  | pull down                          |
| rhIB | pnp  | pull down                          |
| rhIB | pnp  | pull down                          |
| rlmN | pnp  | pull down                          |
| rluB | pnp  | pull down                          |
| rne  | pnp  | pull down                          |
| rne  | pnp  | affinity chromatography technology |
| rne  | pnp  | affinity chromatography technology |
| rne  | pnp  | affinity chromatography technology |
| rne  | pnp  | affinity chromatography technology |
| rne  | pnp  | pull down                          |
| rne  | pnp  | affinity chromatography technology |
| yacl | pnp  | pull down                          |
| ybcJ | pnp  | pull down                          |
| ybcJ | pnp  | pull down                          |
| uvrC | pntA | pull down                          |
| hcaB | ppiB | pull down                          |
| ylbA | ppiB | pull down                          |
| artP | ppk  | pull down                          |
| asmA | ppk  | pull down                          |
| clpA | ppk  | pull down                          |
| hyaD | ppk  | pull down                          |
| hyaE | ppk  | pull down                          |
| pykA | ppk  | pull down                          |
| pdxB | ppk  | pull down                          |
| priB | ppk  | pull down                          |
| rnpA | ppk  | pull down                          |



|      |      |           |
|------|------|-----------|
| ileS | ppk  | pull down |
| trpS | ppk  | pull down |
| yafC | ppk  | pull down |
| ydhW | ppk  | pull down |
| yfbV | ppk  | pull down |
| yfdZ | ppk  | pull down |
| yfjK | ppk  | pull down |
| lpxB | ppsA | pull down |
| paaY | ppsA | pull down |
| tig  | ppsA | pull down |
| uspG | ppsA | pull down |
| wcaC | ppsA | pull down |
| speA | priC | pull down |
| yjjV | priC | pull down |
| cspC | prpD | pull down |
| sdaA | prpD | pull down |
| ydiV | pspF | pull down |
| lpxD | pssA | pull down |
| nusG | pssA | pull down |
| ybeZ | pssA | pull down |
| rluB | pssA | pull down |
| rluC | pssA | pull down |
| rluC | pssA | pull down |
| rnpA | pssA | pull down |
| rnpA | pssA | pull down |
| rnr  | pssA | pull down |
| rpoA | pssA | pull down |
| topA | pssA | pull down |
| trmB | pssA | pull down |
| ybcJ | pssA | pull down |
| ybjX | pssA | pull down |
| yeeN | pssA | pull down |
| yfiF | pssA | pull down |
| cheB | ptsI | pull down |
| greA | ptsI | pull down |
| helD | ptsI | pull down |
| nagK | ptsI | pull down |

|      |      |                            |
|------|------|----------------------------|
| ptsH | ptsI | nuclear magnetic resonance |
| ydeH | ptsI | pull down                  |

|      |     |           |
|------|-----|-----------|
| dnaE | pta | pull down |
| fixB | pta | pull down |
| napD | pta | pull down |
| napD | pta | pull down |
| nudK | pta | pull down |
| ppiB | pta | pull down |
| rpoA | pta | pull down |
| selB | pta | pull down |
| ybil | pta | pull down |
| yjgH | pta | pull down |
| yphB | pta | pull down |

|      |     |                              |
|------|-----|------------------------------|
| frsA | crr | pull down                    |
| trxA | crr | tandem affinity purification |
| trxA | crr | tandem affinity purification |

|     |      |                            |
|-----|------|----------------------------|
| crr | ptsH | nuclear magnetic resonance |
|-----|------|----------------------------|

|      |      |           |
|------|------|-----------|
| ibpA | gatA | pull down |
| pyrH | gatA | pull down |
| tig  | gatA | pull down |

|      |      |           |
|------|------|-----------|
| ibpA | gatB | pull down |
| mreB | gatB | pull down |
| pyrH | gatB | pull down |

|      |      |           |
|------|------|-----------|
| cytR | manX | pull down |
| rpoN | manX | pull down |
| rpoS | manX | pull down |
| tpiA | manX | pull down |
| ydjG | manX | pull down |

|      |      |           |
|------|------|-----------|
| nudI | chbB | pull down |
|------|------|-----------|

|      |      |           |
|------|------|-----------|
| surA | chbC | pull down |
|------|------|-----------|

|      |      |                              |
|------|------|------------------------------|
| gpmA | purC | pull down                    |
| hybE | purC | pull down                    |
| prkB | purC | pull down                    |
| solA | purC | pull down                    |
| panC | purC | pull down                    |
| ribB | purC | pull down                    |
| yjbR | purC | pull down                    |
| <br> |      |                              |
| yjeE | purA | pull down                    |
| <br> |      |                              |
| allB | purR | pull down                    |
| dcm  | purR | pull down                    |
| engD | purR | pull down                    |
| argF | purR | pull down                    |
| ptsI | purR | pull down                    |
| rutR | purR | pull down                    |
| yebC | purR | pull down                    |
| <br> |      |                              |
| clpB | putA | pull down                    |
| cspC | putA | pull down                    |
| fecA | putA | pull down                    |
| ppiB | putA | pull down                    |
| pta  | putA | pull down                    |
| rfaC | putA | pull down                    |
| trxA | putA | tandem affinity purification |
| tig  | putA | pull down                    |
| treA | putA | pull down                    |
| uspG | putA | pull down                    |
| wecG | putA | pull down                    |
| ycaC | putA | pull down                    |
| yjfF | putA | pull down                    |
| yhaK | putA | pull down                    |
| <br> |      |                              |
| ribA | pyrF | pull down                    |
| ribA | pyrF | pull down                    |
| trpH | pyrF | pull down                    |
| yobB | pyrF | pull down                    |
| <br> |      |                              |
| asmA | pyrG | pull down                    |
| ygeV | pyrG | pull down                    |

|      |      |                              |
|------|------|------------------------------|
| cyaA | rapA | pull down                    |
| murA | rapA | pull down                    |
| nusG | rapA | pull down                    |
| nusG | rapA | pull down                    |
| proA | rapA | pull down                    |
| rpoA | rapA | pull down                    |
| rpoA | rapA | pull down                    |
| rpoA | rapA | pull down                    |
| rpoB | rapA | pull down                    |
| rpoC | rapA | pull down                    |
| rpoC | rapA | pull down                    |
| rpoZ | rapA | pull down                    |
| yacl | rapA | pull down                    |
| yacl | rapA | pull down                    |
| yccJ | rapA | pull down                    |
| mtlR | rbfA | pull down                    |
| alsB | rbsB | blue native page             |
| ileS | rbsB | pull down                    |
| trxA | rbsB | tandem affinity purification |
| cbpA | rbsK | pull down                    |
| prs  | rbsK | blue native page             |
| cspC | rcsB | pull down                    |
| dctR | rcsB | pull down                    |
| rlmN | rcsB | pull down                    |
| trxA | rcsB | tandem affinity purification |
| trxA | rcsB | tandem affinity purification |
| yfgM | rcsB | blue native page             |
| hupB | rdgC | pull down                    |
| ligA | rdgC | pull down                    |
| eno  | rdgC | pull down                    |
| nfi  | rdgC | pull down                    |
| qorA | rdgC | pull down                    |
| atpD | recA | pull down                    |

|      |      |                              |
|------|------|------------------------------|
| cheW | recA | pull down                    |
| clpP | recA | pull down                    |
| dmlR | recA | pull down                    |
| dnaJ | recA | pull down                    |
| dxs  | recA | pull down                    |
| eutJ | recA | pull down                    |
| ftsZ | recA | pull down                    |
| glmM | recA | pull down                    |
| gyrA | recA | pull down                    |
| hslU | recA | pull down                    |
| metK | recA | pull down                    |
| mreB | recA | pull down                    |
| narG | recA | pull down                    |
| pnp  | recA | pull down                    |
| pyrH | recA | pull down                    |
| rlmN | recA | pull down                    |
| rph  | recA | pull down                    |
| trxA | recA | tandem affinity purification |
| trxA | recA | tandem affinity purification |
| ydjF | recA | pull down                    |
| yeaM | recA | pull down                    |
|      |      |                              |
| purB | relA | pull down                    |
| ybbL | relA | pull down                    |

|      |      |           |
|------|------|-----------|
|      |      |           |
| ydiH | rfaF | pull down |
|      |      |           |
| flgB | rfaG | pull down |
| glcC | rfaG | pull down |
| recE | rfaG | pull down |
| ydjJ | rfaG | pull down |
|      |      |           |
| aroD | rfaP | pull down |
| fmt  | rfaP | pull down |

|      |      |                                    |
|------|------|------------------------------------|
| cheZ | rhIB | pull down                          |
| pnp  | rhIB | pull down                          |
| pnp  | rhIB | pull down                          |
| rne  | rhIB | pull down                          |
| rne  | rhIB | anti tag coimmunoprecipitation     |
| rne  | rhIB | affinity chromatography technology |
| rne  | rhIB | affinity chromatography technology |
| rne  | rhIB | pull down                          |
| rne  | rhIB | anti tag coimmunoprecipitation     |
| rne  | rhIB | affinity chromatography technology |
| rne  | rhIB | affinity chromatography technology |
| ybcJ | rhIB | pull down                          |

|      |      |           |
|------|------|-----------|
| clpP | rhIE | pull down |
| cspC | rhIE | pull down |
| hupB | rhIE | pull down |
| fdx  | rhIE | pull down |
| frmA | rhIE | pull down |
| infB | rhIE | pull down |
| ppa  | rhIE | pull down |
| phoR | rhIE | pull down |
| rhaS | rhIE | pull down |
| rluC | rhIE | pull down |
| sodA | rhIE | pull down |
| ssb  | rhIE | pull down |

|      |     |           |
|------|-----|-----------|
| acs  | rho | pull down |
| atpD | rho | pull down |
| cbpA | rho | pull down |
| clpA | rho | pull down |
| clpA | rho | pull down |
| clpP | rho | pull down |
| clpP | rho | pull down |
| clpX | rho | pull down |
| cspC | rho | pull down |
| cspC | rho | pull down |
| cspD | rho | pull down |
| cspE | rho | pull down |
| dnaJ | rho | pull down |
| dxs  | rho | pull down |
| fabI | rho | pull down |
| flxA | rho | pull down |
| fre  | rho | pull down |

|      |     |           |
|------|-----|-----------|
| ftsA | rho | pull down |
| gpsA | rho | pull down |
| greA | rho | pull down |
| grpE | rho | pull down |
| gyrA | rho | pull down |
| hda  | rho | pull down |
| hfq  | rho | pull down |
| hfq  | rho | pull down |
| hslR | rho | pull down |
| ispG | rho | pull down |
| lpxD | rho | pull down |
| malT | rho | pull down |
| mreB | rho | pull down |
| nohB | rho | pull down |
| nusG | rho | pull down |
| nusG | rho | pull down |
| nusG | rho | pull down |
| otsB | rho | pull down |
| pdxB | rho | pull down |
| plsB | rho | pull down |
| dnaG | rho | pull down |
| prsA | rho | pull down |
| pyrH | rho | pull down |
| rdoA | rho | pull down |
| rplD | rho | pull down |
| rnpA | rho | pull down |
| rof  | rho | pull down |
| rpoA | rho | pull down |
| rpoB | rho | pull down |
| rpoD | rho | pull down |
| rpoD | rho | pull down |
| ruvB | rho | pull down |
| secA | rho | pull down |
| selB | rho | pull down |
| sspB | rho | pull down |
| tig  | rho | pull down |
| tusA | rho | pull down |
| ubiH | rho | pull down |
| xylG | rho | pull down |
| ycgL | rho | pull down |
| yciH | rho | pull down |
| ydcP | rho | pull down |
| yfaS | rho | pull down |
| yojI | rho | pull down |

|      |      |           |
|------|------|-----------|
| murF | rihC | pull down |
| ade  | rimJ | pull down |
| allA | rimJ | pull down |
| betA | rimJ | pull down |
| betB | rimJ | pull down |
| folX | rimJ | pull down |
| nuoI | rimJ | pull down |
| recX | rimJ | pull down |
| rihB | rimJ | pull down |
| rplR | rimJ | pull down |
| topA | rimJ | pull down |
| yagH | rimJ | pull down |
| yciN | rimJ | pull down |
| yecF | rimJ | pull down |
| yffB | rimJ | pull down |
| yfhA | rimJ | pull down |
| yobB | rimJ | pull down |

|       |      |                                                   |
|-------|------|---------------------------------------------------|
| aidB  | rplA | pull down                                         |
| allR  | rplA | pull down                                         |
| atpA  | rplA | comigration in non denaturing gel electrophoresis |
| cbpA  | rplA | pull down                                         |
| clpP  | rplA | pull down                                         |
| coaBC | rplA | pull down                                         |
| cspA  | rplA | pull down                                         |
| cspA  | rplA | pull down                                         |
| cspB  | rplA | pull down                                         |
| cspC  | rplA | pull down                                         |
| cspC  | rplA | pull down                                         |
| cspC  | rplA | pull down                                         |
| cspD  | rplA | pull down                                         |
| cspE  | rplA | pull down                                         |
| cspE  | rplA | pull down                                         |
| cspE  | rplA | pull down                                         |
| cspG  | rplA | pull down                                         |
| cspG  | rplA | pull down                                         |



|      |      |           |
|------|------|-----------|
| cspl | rplA | pull down |
| hupB | rplA | pull down |
| dcm  | rplA | pull down |
| dctR | rplA | pull down |
| dcyD | rplA | pull down |
| deaD | rplA | pull down |
| deaD | rplA | pull down |
| dam  | rplA | pull down |
| dnaB | rplA | pull down |
| dnaB | rplA | pull down |
| dnaJ | rplA | pull down |
| dppF | rplA | pull down |
| fabA | rplA | pull down |
| fabZ | rplA | pull down |
| fmt  | rplA | pull down |
| glmU | rplA | pull down |
| glnB | rplA | pull down |
| hemH | rplA | pull down |
| hfq  | rplA | pull down |
| holB | rplA | pull down |
| holB | rplA | pull down |
| holE | rplA | pull down |
| hscB | rplA | pull down |
| hslR | rplA | pull down |
| iclR | rplA | pull down |
| ihfA | rplA | pull down |
| ihfB | rplA | pull down |
| kdsA | rplA | pull down |
| waaA | rplA | pull down |
| lpxD | rplA | pull down |
| maa  | rplA | pull down |
| moaC | rplA | pull down |
| nusA | rplA | pull down |
| parC | rplA | pull down |
| ybeZ | rplA | pull down |
| ybeZ | rplA | pull down |
| malP | rplA | pull down |
| pnp  | rplA | pull down |
| priB | rplA | pull down |
| priC | rplA | pull down |
| dnaG | rplA | pull down |
| pssA | rplA | pull down |
| pyrH | rplA | pull down |
| recG | rplA | pull down |
| rfaF | rplA | pull down |

|      |      |                                    |
|------|------|------------------------------------|
| rhIB | rplA | pull down                          |
| rhIE | rplA | pull down                          |
| rlmE | rplA | pull down                          |
| rlmL | rplA | pull down                          |
| rlmL | rplA | pull down                          |
| rlmN | rplA | pull down                          |
| rlmN | rplA | pull down                          |
| rlmN | rplA | pull down                          |
| rluB | rplA | pull down                          |
| rluB | rplA | pull down                          |
| rluC | rplA | pull down                          |
| rluC | rplA | pull down                          |
| rluC | rplA | pull down                          |
| rluF | rplA | pull down                          |
| rne  | rplA | pull down                          |
| rne  | rplA | affinity chromatography technology |
| rne  | rplA | affinity chromatography technology |
| rne  | rplA | affinity chromatography technology |
| rne  | rplA | affinity chromatography technology |
| rne  | rplA | affinity chromatography technology |
| rnpA | rplA | pull down                          |
| rnpA | rplA | pull down                          |
| rnr  | rplA | pull down                          |
| rnr  | rplA | pull down                          |
| rpoA | rplA | pull down                          |
| rpoD | rplA | pull down                          |
| rpoD | rplA | pull down                          |
| rpoS | rplA | pull down                          |
| rppH | rplA | pull down                          |
| rppH | rplA | pull down                          |
| rumB | rplA | pull down                          |
| rutR | rplA | pull down                          |
| selB | rplA | pull down                          |
| srlR | rplA | pull down                          |
| srmB | rplA | pull down                          |
| smpB | rplA | pull down                          |
| sufC | rplA | pull down                          |
| thrS | rplA | pull down                          |
| thrS | rplA | pull down                          |
| tgt  | rplA | pull down                          |
| thil | rplA | pull down                          |
| tig  | rplA | pull down                          |
| tilS | rplA | pull down                          |
| trmL | rplA | pull down                          |
| ulaR | rplA | pull down                          |

|      |      |           |
|------|------|-----------|
| uvrC | rplA | pull down |
| uvrC | rplA | pull down |
| wcaK | rplA | pull down |
| yaеJ | rplA | pull down |
| yahA | rplA | pull down |
| ybaK | rplA | pull down |
| ybaZ | rplA | pull down |
| ybcJ | rplA | pull down |
| ybcJ | rplA | pull down |
| ybiA | rplA | pull down |
| ybjX | rplA | pull down |
| ybjX | rplA | pull down |
| ycbG | rplA | pull down |
| ychJ | rplA | pull down |
| yciH | rplA | pull down |
| ydcP | rplA | pull down |
| ydcP | rplA | pull down |
| ydhQ | rplA | pull down |
| ydiE | rplA | pull down |
| yeaM | rplA | pull down |
| yeaO | rplA | pull down |
| yfiF | rplA | pull down |
| yfiF | rplA | pull down |
| ygaV | rplA | pull down |
| yhbQ | rplA | pull down |
| yibL | rplA | pull down |
| ymgA | rplA | pull down |
| yneG | rplA | pull down |

|      |      |           |
|------|------|-----------|
| aroL | rplJ | pull down |
| can  | rplJ | pull down |
| clpA | rplJ | pull down |
| clpP | rplJ | pull down |
| dinG | rplJ | pull down |
| dnaJ | rplJ | pull down |
| dnaK | rplJ | pull down |
| fabI | rplJ | pull down |
| fabZ | rplJ | pull down |
| fixB | rplJ | pull down |
| greA | rplJ | pull down |
| grpE | rplJ | pull down |
| gyrB | rplJ | pull down |
| holB | rplJ | pull down |
| hscA | rplJ | pull down |
| hscA | rplJ | pull down |

|      |      |           |
|------|------|-----------|
| hscB | rplJ | pull down |
| hscC | rplJ | pull down |
| hscC | rplJ | pull down |
| hslU | rplJ | pull down |
| hslV | rplJ | pull down |
| ppa  | rplJ | pull down |
| lpxA | rplJ | pull down |
| lpxB | rplJ | pull down |
| narQ | rplJ | pull down |
| nfuA | rplJ | pull down |
| ybeZ | rplJ | pull down |
| ravA | rplJ | pull down |
| recA | rplJ | pull down |
| rhaS | rplJ | pull down |
| rlmE | rplJ | pull down |
| rlmE | rplJ | pull down |
| rpiB | rplJ | pull down |
| rppH | rplJ | pull down |
| sspB | rplJ | pull down |
| tauD | rplJ | pull down |
| tig  | rplJ | pull down |
| tilS | rplJ | pull down |
| trmB | rplJ | pull down |
| truB | rplJ | pull down |
| ybaZ | rplJ | pull down |
| ybcM | rplJ | pull down |
| ybjX | rplJ | pull down |
| yeeZ | rplJ | pull down |
| yfhA | rplJ | pull down |
| yihI | rplJ | pull down |
| yniC | rplJ | pull down |

|      |      |           |
|------|------|-----------|
| clpP | rplK | pull down |
| deaD | rplK | pull down |
| ftsA | rplK | pull down |
| ftsE | rplK | pull down |
| glmM | rplK | pull down |
| hscB | rplK | pull down |
| ispA | rplK | pull down |
| kdsB | rplK | pull down |
| lpxD | rplK | pull down |
| murA | rplK | pull down |
| murG | rplK | pull down |
| murI | rplK | pull down |
| plsB | rplK | pull down |

|      |      |           |
|------|------|-----------|
| ppiC | rplK | pull down |
| prmA | rplK | pull down |
| prmA | rplK | pull down |
| prmA | rplK | pull down |
| pth  | rplK | pull down |
| pyrH | rplK | pull down |
| rhlB | rplK | pull down |
| rimN | rplK | pull down |
| rne  | rplK | pull down |
| rne  | rplK | pull down |
| rnpA | rplK | pull down |
| rpoB | rplK | pull down |
| secA | rplK | pull down |
| leuS | rplK | pull down |
| ybcJ | rplK | pull down |
| ydhQ | rplK | pull down |
| yhbY | rplK | pull down |

|      |      |           |
|------|------|-----------|
| aidB | rplM | pull down |
| map  | rplM | pull down |
| clpA | rplM | pull down |
| clpB | rplM | pull down |
| clpP | rplM | pull down |
| cspC | rplM | pull down |
| cspC | rplM | pull down |
| cspD | rplM | pull down |
| cspG | rplM | pull down |
| dcm  | rplM | pull down |
| deaD | rplM | pull down |
| deaD | rplM | pull down |
| dusC | rplM | pull down |
| folA | rplM | pull down |
| fabZ | rplM | pull down |
| fimB | rplM | pull down |
| fis  | rplM | pull down |
| fucU | rplM | pull down |
| glmM | rplM | pull down |
| greA | rplM | pull down |
| hfq  | rplM | pull down |
| hoID | rplM | pull down |
| hslR | rplM | pull down |
| hslU | rplM | pull down |
| iclR | rplM | pull down |
| ihfB | rplM | pull down |
| ilvB | rplM | pull down |

|      |      |           |
|------|------|-----------|
| ppa  | rplM | pull down |
| ispA | rplM | pull down |
| kdsA | rplM | pull down |
| waaA | rplM | pull down |
| lepA | rplM | pull down |
| lolA | rplM | pull down |
| lon  | rplM | pull down |
| lon  | rplM | pull down |
| lpxA | rplM | pull down |
| lpxB | rplM | pull down |
| lpxD | rplM | pull down |
| mnmE | rplM | pull down |
| mukB | rplM | pull down |
| mukB | rplM | pull down |
| murA | rplM | pull down |
| murG | rplM | pull down |
| nusB | rplM | pull down |
| paaX | rplM | pull down |
| parC | rplM | pull down |
| ybeZ | rplM | pull down |
| ybeZ | rplM | pull down |
| malP | rplM | pull down |
| plsB | rplM | pull down |
| pnp  | rplM | pull down |
| pnp  | rplM | pull down |
| ppiC | rplM | pull down |
| pth  | rplM | pull down |
| pyrH | rplM | pull down |
| rcsA | rplM | pull down |
| rcsB | rplM | pull down |
| rcsB | rplM | pull down |
| rhIB | rplM | pull down |
| ribH | rplM | pull down |
| rlmB | rplM | pull down |
| rlmN | rplM | pull down |
| rlmN | rplM | pull down |
| rluB | rplM | pull down |
| rluB | rplM | pull down |
| rluC | rplM | pull down |
| rluC | rplM | pull down |
| rne  | rplM | pull down |
| rnpA | rplM | pull down |
| rnr  | rplM | pull down |
| rnr  | rplM | pull down |
| rpoA | rplM | pull down |

|      |      |           |
|------|------|-----------|
| rpoA | rplM | pull down |
| rpoC | rplM | pull down |
| rppH | rplM | pull down |
| rppH | rplM | pull down |
| rsgA | rplM | pull down |
| rsmG | rplM | pull down |
| selB | rplM | pull down |
| skp  | rplM | pull down |
| spoT | rplM | pull down |
| srlR | rplM | pull down |
| smpB | rplM | pull down |
| glyQ | rplM | pull down |
| thrS | rplM | pull down |
| trpS | rplM | pull down |
| tgt  | rplM | pull down |
| tig  | rplM | pull down |
| trmB | rplM | pull down |
| ulaR | rplM | pull down |
| uvrC | rplM | pull down |
| uvrD | rplM | pull down |
| yacl | rplM | pull down |
| yacl | rplM | pull down |
| ybcJ | rplM | pull down |
| ybhK | rplM | pull down |
| ybjX | rplM | pull down |
| ybjX | rplM | pull down |
| yfiQ | rplM | pull down |
| yhbY | rplM | pull down |
| yibL | rplM | pull down |
| yraN | rplM | pull down |

|      |      |           |
|------|------|-----------|
| aroM | rplN | pull down |
| cheW | rplN | pull down |
| der  | rplN | pull down |
| dnaA | rplN | pull down |
| dtd  | rplN | pull down |
| dusC | rplN | pull down |
| entB | rplN | pull down |
| fdhE | rplN | pull down |
| fkpB | rplN | pull down |
| fliS | rplN | pull down |
| ftsZ | rplN | pull down |
| glgX | rplN | pull down |
| grpE | rplN | pull down |
| hfq  | rplN | pull down |

|      |      |           |
|------|------|-----------|
| hns  | rplN | pull down |
| mhpE | rplN | pull down |
| hscA | rplN | pull down |
| hslR | rplN | pull down |
| ihfA | rplN | pull down |
| ppa  | rplN | pull down |
| kdsA | rplN | pull down |
| lpxA | rplN | pull down |
| nfuA | rplN | pull down |
| nudB | rplN | pull down |
| ppiB | rplN | pull down |
| rluC | rplN | pull down |
| rnpA | rplN | pull down |
| rnr  | rplN | pull down |
| rppH | rplN | pull down |
| slyD | rplN | pull down |
| speE | rplN | pull down |
| tig  | rplN | pull down |
| tig  | rplN | pull down |
| ulaR | rplN | pull down |
| uvrC | rplN | pull down |
| wzb  | rplN | pull down |
| yacl | rplN | pull down |
| yacl | rplN | pull down |
| ybeB | rplN | pull down |
| ydhQ | rplN | pull down |
| ydiZ | rplN | pull down |
| ydjF | rplN | pull down |
| yedM | rplN | pull down |
| yfcU | rplN | pull down |
| yjeE | rplN | pull down |
| yobB | rplN | pull down |

|      |      |           |
|------|------|-----------|
| acpP | rplO | pull down |
| adiA | rplO | pull down |
| atoC | rplO | pull down |
| cbrC | rplO | pull down |
| cspA | rplO | pull down |
| cspE | rplO | pull down |
| damX | rplO | pull down |
| hupA | rplO | pull down |
| dinG | rplO | pull down |
| dnaA | rplO | pull down |
| dnaB | rplO | pull down |
| dsdC | rplO | pull down |



|      |      |                                    |
|------|------|------------------------------------|
| eutP | rplO | pull down                          |
| fkpB | rplO | pull down                          |
| glmU | rplO | pull down                          |
| grpE | rplO | pull down                          |
| hfq  | rplO | pull down                          |
| hldD | rplO | pull down                          |
| ihfB | rplO | pull down                          |
| lpxA | rplO | pull down                          |
| lpxD | rplO | pull down                          |
| lpxD | rplO | pull down                          |
| nusA | rplO | pull down                          |
| nusA | rplO | pull down                          |
| obgE | rplO | pull down                          |
| paaX | rplO | pull down                          |
| pepT | rplO | pull down                          |
| ybeZ | rplO | pull down                          |
| plsB | rplO | pull down                          |
| pnp  | rplO | pull down                          |
| psd  | rplO | pull down                          |
| recO | rplO | pull down                          |
| rhmD | rplO | pull down                          |
| rlmN | rplO | pull down                          |
| rlmN | rplO | pull down                          |
| rluC | rplO | pull down                          |
| rluC | rplO | pull down                          |
| rne  | rplO | affinity chromatography technology |
| rne  | rplO | affinity chromatography technology |
| rnpA | rplO | pull down                          |
| rnr  | rplO | pull down                          |
| rnr  | rplO | pull down                          |
| rpoA | rplO | pull down                          |
| rpoA | rplO | pull down                          |
| rpoC | rplO | pull down                          |
| rpoD | rplO | pull down                          |
| rppH | rplO | pull down                          |
| rppH | rplO | pull down                          |
| selB | rplO | pull down                          |
| skp  | rplO | pull down                          |
| slyD | rplO | pull down                          |
| spoT | rplO | pull down                          |
| srlR | rplO | pull down                          |
| tig  | rplO | pull down                          |
| tilS | rplO | pull down                          |
| truB | rplO | pull down                          |
| uspF | rplO | pull down                          |

|      |      |           |
|------|------|-----------|
| yacl | rplO | pull down |
| yacl | rplO | pull down |
| ybjX | rplO | pull down |
| ydhZ | rplO | pull down |
| yecA | rplO | pull down |
| yegL | rplO | pull down |
| yfcH | rplO | pull down |
| yfeD | rplO | pull down |
| yfiQ | rplO | pull down |
| ygiC | rplO | pull down |
| yhbY | rplO | pull down |
| yhcO | rplO | pull down |
| yihI | rplO | pull down |
| yjaG | rplO | pull down |
| yqgE | rplO | pull down |

|      |      |           |
|------|------|-----------|
| deaD | rplP | pull down |
| dnaA | rplP | pull down |
| ftsE | rplP | pull down |
| glnA | rplP | pull down |
| holA | rplP | pull down |
| hslU | rplP | pull down |
| ihfB | rplP | pull down |
| gmk  | rplP | pull down |
| lpxD | rplP | pull down |
| mtfA | rplP | pull down |
| nusA | rplP | pull down |
| ybeZ | rplP | pull down |
| rcaA | rplP | pull down |
| rluC | rplP | pull down |
| rnpA | rplP | pull down |
| rnr  | rplP | pull down |
| rpoA | rplP | pull down |
| rpoC | rplP | pull down |
| rppH | rplP | pull down |
| glyQ | rplP | pull down |
| tig  | rplP | pull down |
| yacl | rplP | pull down |
| ybeY | rplP | pull down |
| yfcD | rplP | pull down |
| yfcZ | rplP | pull down |
| yfiF | rplP | pull down |
| yfiQ | rplP | pull down |
| ygiC | rplP | pull down |

|      |      |           |
|------|------|-----------|
| alkB | rplQ | pull down |
| cbrC | rplQ | pull down |
| cca  | rplQ | pull down |
| cho  | rplQ | pull down |
| clpA | rplQ | pull down |
| cspA | rplQ | pull down |
| cspl | rplQ | pull down |
| hupB | rplQ | pull down |
| dead | rplQ | pull down |
| dam  | rplQ | pull down |
| era  | rplQ | pull down |
| fdhE | rplQ | pull down |
| fimB | rplQ | pull down |
| fkpB | rplQ | pull down |
| fmt  | rplQ | pull down |
| ftsN | rplQ | pull down |
| glcC | rplQ | pull down |
| glmU | rplQ | pull down |
| glnA | rplQ | pull down |
| greB | rplQ | pull down |
| grpE | rplQ | pull down |
| hscA | rplQ | pull down |
| hscC | rplQ | pull down |
| hslV | rplQ | pull down |
| hycl | rplQ | pull down |
| hyi  | rplQ | pull down |
| intD | rplQ | pull down |
| iscX | rplQ | pull down |
| lpxA | rplQ | pull down |
| lpxH | rplQ | pull down |
| moaC | rplQ | pull down |
| msyB | rplQ | pull down |
| mtfA | rplQ | pull down |
| mug  | rplQ | pull down |
| mukB | rplQ | pull down |
| murG | rplQ | pull down |
| mutH | rplQ | pull down |
| mutY | rplQ | pull down |
| narQ | rplQ | pull down |
| npdA | rplQ | pull down |
| obgE | rplQ | pull down |
| pdxK | rplQ | pull down |
| phrB | rplQ | pull down |
| pmrD | rplQ | pull down |
| pnp  | rplQ | pull down |

|      |      |           |
|------|------|-----------|
| priA | rplQ | pull down |
| pssA | rplQ | pull down |
| recG | rplQ | pull down |
| rfaF | rplQ | pull down |
| rfaZ | rplQ | pull down |
| rhmD | rplQ | pull down |
| rimO | rplQ | pull down |
| rlmL | rplQ | pull down |
| rlmM | rplQ | pull down |
| rlmN | rplQ | pull down |
| rluC | rplQ | pull down |
| rluC | rplQ | pull down |
| rluF | rplQ | pull down |
| rng  | rplQ | pull down |
| rnk  | rplQ | pull down |
| rnpA | rplQ | pull down |
| rpoC | rplQ | pull down |
| rpoE | rplQ | pull down |
| rppH | rplQ | pull down |
| rppH | rplQ | pull down |
| rraA | rplQ | pull down |
| rsmB | rplQ | pull down |
| rsmE | rplQ | pull down |
| rutR | rplQ | pull down |
| selB | rplQ | pull down |
| speA | rplQ | pull down |
| spoT | rplQ | pull down |
| spr  | rplQ | pull down |
| tgt  | rplQ | pull down |
| tig  | rplQ | pull down |
| tilS | rplQ | pull down |
| tpiA | rplQ | pull down |
| truB | rplQ | pull down |
| upp  | rplQ | pull down |
| wcaK | rplQ | pull down |
| wzb  | rplQ | pull down |
| xerD | rplQ | pull down |
| yacL | rplQ | pull down |
| yahK | rplQ | pull down |
| ybcJ | rplQ | pull down |
| ybcM | rplQ | pull down |
| ybeY | rplQ | pull down |
| ybjX | rplQ | pull down |
| ycdY | rplQ | pull down |
| yceD | rplQ | pull down |

|       |      |           |
|-------|------|-----------|
| ycfD  | rplQ | pull down |
| yciH  | rplQ | pull down |
| yciU  | rplQ | pull down |
| ydiE  | rplQ | pull down |
| yebC  | rplQ | pull down |
| yecF  | rplQ | pull down |
| yeeN  | rplQ | pull down |
| yegU  | rplQ | pull down |
| yfeD  | rplQ | pull down |
| yfiF  | rplQ | pull down |
| yfiQ  | rplQ | pull down |
| ygaM  | rplQ | pull down |
| ygaV  | rplQ | pull down |
| ygckK | rplQ | pull down |
| ygdL  | rplQ | pull down |
| ygiC  | rplQ | pull down |
| yhbS  | rplQ | pull down |
| yhbY  | rplQ | pull down |
| yhiN  | rplQ | pull down |
| yihI  | rplQ | pull down |
| yjaG  | rplQ | pull down |
| yjhl  | rplQ | pull down |
| ymgA  | rplQ | pull down |

|      |      |           |
|------|------|-----------|
| accA | rplR | pull down |
| allR | rplR | pull down |
| clpA | rplR | pull down |
| cspA | rplR | pull down |
| cspC | rplR | pull down |
| deaD | rplR | pull down |
| dusC | rplR | pull down |
| ftsE | rplR | pull down |
| hscC | rplR | pull down |
| lpxD | rplR | pull down |
| mukB | rplR | pull down |
| pyrH | rplR | pull down |
| rlmB | rplR | pull down |
| rlmN | rplR | pull down |
| rluC | rplR | pull down |
| rnpA | rplR | pull down |
| rppH | rplR | pull down |
| rppH | rplR | pull down |
| spoT | rplR | pull down |
| srlR | rplR | pull down |
| ybcJ | rplR | pull down |

|      |      |           |
|------|------|-----------|
| yfiF | rplR | pull down |
| ygcN | rplR | pull down |
| yheU | rplR | pull down |
| yibL | rplR | pull down |

|      |      |           |
|------|------|-----------|
| aidB | rplS | pull down |
| allR | rplS | pull down |
| map  | rplS | pull down |
| atoC | rplS | pull down |
| cbpA | rplS | pull down |
| cbrC | rplS | pull down |
| clpP | rplS | pull down |
| cspA | rplS | pull down |
| cspC | rplS | pull down |
| cspD | rplS | pull down |
| cspE | rplS | pull down |
| cysA | rplS | pull down |
| hupB | rplS | pull down |
| deaD | rplS | pull down |
| deoB | rplS | pull down |
| dam  | rplS | pull down |
| dnaJ | rplS | pull down |
| dnaK | rplS | pull down |
| dtd  | rplS | pull down |
| fabA | rplS | pull down |
| fabZ | rplS | pull down |
| fadI | rplS | pull down |
| fimB | rplS | pull down |
| fis  | rplS | pull down |
| fkpB | rplS | pull down |
| fliS | rplS | pull down |
| grpE | rplS | pull down |
| grpE | rplS | pull down |
| hfq  | rplS | pull down |
| hldD | rplS | pull down |
| hoIC | rplS | pull down |
| hslR | rplS | pull down |
| hslV | rplS | pull down |
| ihfB | rplS | pull down |
| ppa  | rplS | pull down |
| kdsA | rplS | pull down |
| kdsA | rplS | pull down |
| waaA | rplS | pull down |
| lpxB | rplS | pull down |
| lpxD | rplS | pull down |

|      |      |           |
|------|------|-----------|
| malT | rplS | pull down |
| moaC | rplS | pull down |
| murG | rplS | pull down |
| nfi  | rplS | pull down |
| nlpA | rplS | pull down |
| nusA | rplS | pull down |
| nusA | rplS | pull down |
| pdxH | rplS | pull down |
| ybeZ | rplS | pull down |
| ybeZ | rplS | pull down |
| malP | rplS | pull down |
| plsB | rplS | pull down |
| pncB | rplS | pull down |
| ppiC | rplS | pull down |
| ptrA | rplS | pull down |
| pyrH | rplS | pull down |
| rcaA | rplS | pull down |
| rcaB | rplS | pull down |
| relA | rplS | pull down |
| rhlB | rplS | pull down |
| ribD | rplS | pull down |
| rlmB | rplS | pull down |
| rlmN | rplS | pull down |
| rlmN | rplS | pull down |
| rluB | rplS | pull down |
| rluC | rplS | pull down |
| rluC | rplS | pull down |
| rnpA | rplS | pull down |
| rpoA | rplS | pull down |
| rpoC | rplS | pull down |
| rpoD | rplS | pull down |
| rppH | rplS | pull down |
| rppH | rplS | pull down |
| selB | rplS | pull down |
| skp  | rplS | pull down |
| spoT | rplS | pull down |
| glyQ | rplS | pull down |
| thrS | rplS | pull down |
| tgt  | rplS | pull down |
| trmB | rplS | pull down |
| ubiG | rplS | pull down |
| ulaR | rplS | pull down |
| uspC | rplS | pull down |
| uspF | rplS | pull down |
| uvrC | rplS | pull down |

|      |      |           |
|------|------|-----------|
| wzb  | rplS | pull down |
| ybcJ | rplS | pull down |
| ybeB | rplS | pull down |
| ybjX | rplS | pull down |
| ydcP | rplS | pull down |
| ydhW | rplS | pull down |
| yehX | rplS | pull down |
| yfcH | rplS | pull down |
| yhbS | rplS | pull down |
| yibL | rplS | pull down |
| yjjU | rplS | pull down |

|      |      |           |
|------|------|-----------|
| acpS | rplB | pull down |
| ada  | rplB | pull down |
| ade  | rplB | pull down |
| adhE | rplB | pull down |
| adiA | rplB | pull down |
| alkB | rplB | pull down |
| eda  | rplB | pull down |
| allR | rplB | pull down |
| appY | rplB | pull down |
| argK | rplB | pull down |
| arnA | rplB | pull down |
| astA | rplB | pull down |
| bgIX | rplB | pull down |
| btuE | rplB | pull down |
| cbpA | rplB | pull down |
| cbpA | rplB | pull down |
| cca  | rplB | pull down |
| ccmE | rplB | pull down |
| clpA | rplB | pull down |
| clpB | rplB | pull down |
| cspA | rplB | pull down |
| cspB | rplB | pull down |
| cspC | rplB | pull down |
| cspC | rplB | pull down |
| cspC | rplB | pull down |
| cspD | rplB | pull down |
| cspE | rplB | pull down |
| cspE | rplB | pull down |
| cspG | rplB | pull down |
| cspl | rplB | pull down |
| cutA | rplB | pull down |
| hupA | rplB | pull down |
| hupB | rplB | pull down |



|      |      |           |
|------|------|-----------|
| dcm  | rplB | pull down |
| dcp  | rplB | pull down |
| dctR | rplB | pull down |
| deaD | rplB | pull down |
| deaD | rplB | pull down |
| der  | rplB | pull down |
| ndh  | rplB | pull down |
| diaA | rplB | pull down |
| dnaA | rplB | pull down |
| dnaA | rplB | pull down |
| dppF | rplB | pull down |
| elaA | rplB | pull down |
| elaB | rplB | pull down |
| era  | rplB | pull down |
| eutP | rplB | pull down |
| fabA | rplB | pull down |
| fabB | rplB | pull down |
| fabZ | rplB | pull down |
| fadB | rplB | pull down |
| fadI | rplB | pull down |
| fdnH | rplB | pull down |
| fimB | rplB | pull down |
| fis  | rplB | pull down |
| fkpB | rplB | pull down |
| fldA | rplB | pull down |
| fldB | rplB | pull down |
| flgB | rplB | pull down |
| fliG | rplB | pull down |
| fliI | rplB | pull down |
| fliM | rplB | pull down |
| flk  | rplB | pull down |
| flxA | rplB | pull down |
| ftsE | rplB | pull down |
| fumC | rplB | pull down |
| gatD | rplB | pull down |
| glcC | rplB | pull down |
| glmU | rplB | pull down |
| glnA | rplB | pull down |
| glnB | rplB | pull down |
| glpD | rplB | pull down |
| gmhB | rplB | pull down |
| greA | rplB | pull down |
| gspE | rplB | pull down |
| hemN | rplB | pull down |
| hfIC | rplB | pull down |

|      |      |           |
|------|------|-----------|
| hfq  | rplB | pull down |
| hfq  | rplB | pull down |
| holB | rplB | pull down |
| holC | rplB | pull down |
| holC | rplB | pull down |
| hscA | rplB | pull down |
| hslR | rplB | pull down |
| hslV | rplB | pull down |
| htpG | rplB | pull down |
| htrB | rplB | pull down |
| hyaD | rplB | pull down |
| hyaE | rplB | pull down |
| hybD | rplB | pull down |
| hycl | rplB | pull down |
| hyfR | rplB | pull down |
| idnD | rplB | pull down |
| ihfB | rplB | pull down |
| intA | rplB | pull down |
| intB | rplB | pull down |
| intD | rplB | pull down |
| intQ | rplB | pull down |
| iscA | rplB | pull down |
| iscR | rplB | pull down |
| iscX | rplB | pull down |
| ispA | rplB | pull down |
| ispB | rplB | pull down |
| tmk  | rplB | pull down |
| lpxD | rplB | pull down |
| lpxD | rplB | pull down |
| maa  | rplB | pull down |
| mall | rplB | pull down |
| malY | rplB | pull down |
| manA | rplB | pull down |
| manC | rplB | pull down |
| maoC | rplB | pull down |
| mcrA | rplB | pull down |
| mdtN | rplB | pull down |
| meIR | rplB | pull down |
| mfd  | rplB | pull down |
| miaB | rplB | pull down |
| minC | rplB | pull down |
| mliC | rplB | pull down |
| mnmA | rplB | pull down |
| msyB | rplB | pull down |
| solA | rplB | pull down |

|      |      |           |
|------|------|-----------|
| mug  | rplB | pull down |
| mukB | rplB | pull down |
| mukB | rplB | pull down |
| mukE | rplB | pull down |
| mutH | rplB | pull down |
| mutY | rplB | pull down |
| nagZ | rplB | pull down |
| napD | rplB | pull down |
| nikE | rplB | pull down |
| norV | rplB | pull down |
| npdA | rplB | pull down |
| nudI | rplB | pull down |
| nusA | rplB | pull down |
| nusA | rplB | pull down |
| nusG | rplB | pull down |
| obgE | rplB | pull down |
| paaB | rplB | pull down |
| paaX | rplB | pull down |
| parC | rplB | pull down |
| pbpC | rplB | pull down |
| ybeZ | rplB | pull down |
| phrB | rplB | pull down |
| plsB | rplB | pull down |
| pmrD | rplB | pull down |
| pncB | rplB | pull down |
| pnp  | rplB | pull down |
| appA | rplB | pull down |
| ppsA | rplB | pull down |
| priA | rplB | pull down |
| priB | rplB | pull down |
| priC | rplB | pull down |
| pssA | rplB | pull down |
| psuG | rplB | pull down |
| ptrA | rplB | pull down |
| ptrB | rplB | pull down |
| purT | rplB | pull down |
| pyrH | rplB | pull down |
| qseC | rplB | pull down |
| racC | rplB | pull down |
| rcaA | rplB | pull down |
| recA | rplB | pull down |
| recG | rplB | pull down |
| relA | rplB | pull down |
| rfaB | rplB | pull down |
| rfaC | rplB | pull down |

|      |      |                                    |
|------|------|------------------------------------|
| rfaF | rplB | pull down                          |
| rfaG | rplB | pull down                          |
| rfaP | rplB | pull down                          |
| rffA | rplB | pull down                          |
| rhIE | rplB | pull down                          |
| rlmL | rplB | pull down                          |
| rlmM | rplB | pull down                          |
| rlmN | rplB | pull down                          |
| rlmN | rplB | pull down                          |
| rlmN | rplB | pull down                          |
| rluB | rplB | pull down                          |
| rluC | rplB | pull down                          |
| rluC | rplB | pull down                          |
| rluC | rplB | pull down                          |
| rluD | rplB | pull down                          |
| rluE | rplB | pull down                          |
| rne  | rplB | pull down                          |
| rne  | rplB | affinity chromatography technology |
| rne  | rplB | affinity chromatography technology |
| rne  | rplB | pull down                          |
| rne  | rplB | affinity chromatography technology |
| rng  | rplB | pull down                          |
| rnhA | rplB | pull down                          |
| rnk  | rplB | pull down                          |
| rnpA | rplB | pull down                          |
| rnpA | rplB | pull down                          |
| rnpA | rplB | pull down                          |
| rnr  | rplB | pull down                          |
| rnr  | rplB | pull down                          |
| rpoA | rplB | pull down                          |
| rpoA | rplB | pull down                          |
| rpoB | rplB | pull down                          |
| rpoB | rplB | pull down                          |
| rpoC | rplB | pull down                          |
| rpoC | rplB | pull down                          |
| rpoC | rplB | pull down                          |
| rpoD | rplB | pull down                          |
| rpoZ | rplB | pull down                          |
| rppH | rplB | pull down                          |
| rppH | rplB | pull down                          |
| rppH | rplB | pull down                          |
| rsmB | rplB | pull down                          |
| rsmC | rplB | pull down                          |
| rsmD | rplB | pull down                          |
| rumB | rplB | pull down                          |

|      |      |           |
|------|------|-----------|
| rutA | rplB | pull down |
| rutR | rplB | pull down |
| yqgF | rplB | pull down |
| selB | rplB | pull down |
| selB | rplB | pull down |
| selD | rplB | pull down |
| serC | rplB | pull down |
| sfsB | rplB | pull down |
| smg  | rplB | pull down |
| sodB | rplB | pull down |
| soxR | rplB | pull down |
| speA | rplB | pull down |
| spoT | rplB | pull down |
| spoT | rplB | pull down |
| spr  | rplB | pull down |
| sprT | rplB | pull down |
| srlR | rplB | pull down |
| srmB | rplB | pull down |
| srmB | rplB | pull down |
| ssuE | rplB | pull down |
| stfQ | rplB | pull down |
| stfR | rplB | pull down |
| stpA | rplB | pull down |
| sbp  | rplB | pull down |
| metG | rplB | pull down |
| tehB | rplB | pull down |
| tgt  | rplB | pull down |
| tgt  | rplB | pull down |
| thil | rplB | pull down |
| tig  | rplB | pull down |
| tilS | rplB | pull down |
| tldD | rplB | pull down |
| torR | rplB | pull down |
| treR | rplB | pull down |
| trmB | rplB | pull down |
| trmL | rplB | pull down |
| trpE | rplB | pull down |
| truB | rplB | pull down |
| truD | rplB | pull down |
| thyA | rplB | pull down |
| ubiX | rplB | pull down |
| ung  | rplB | pull down |
| uvrC | rplB | pull down |
| uvrC | rplB | pull down |
| uvrY | rplB | pull down |

|      |      |           |
|------|------|-----------|
| wcaC | rplB | pull down |
| wcaK | rplB | pull down |
| wzb  | rplB | pull down |
| yacl | rplB | pull down |
| yacl | rplB | pull down |
| yaej | rplB | pull down |
| yafP | rplB | pull down |
| ybaK | rplB | pull down |
| ybeY | rplB | pull down |
| ybgC | rplB | pull down |
| ybiA | rplB | pull down |
| ybjD | rplB | pull down |
| ybjX | rplB | pull down |
| ybjX | rplB | pull down |
| ybjX | rplB | pull down |
| ycaK | rplB | pull down |
| ycbG | rplB | pull down |
| yccJ | rplB | pull down |
| ycdB | rplB | pull down |
| ycdY | rplB | pull down |
| yceA | rplB | pull down |
| ycfD | rplB | pull down |
| ycgB | rplB | pull down |
| ycgL | rplB | pull down |
| ycgM | rplB | pull down |
| ycgZ | rplB | pull down |
| ychJ | rplB | pull down |
| yciH | rplB | pull down |
| ycjZ | rplB | pull down |
| ydaE | rplB | pull down |
| ydbA | rplB | pull down |
| ydcF | rplB | pull down |
| ydcP | rplB | pull down |
| yddH | rplB | pull down |
| ydiE | rplB | pull down |
| ydiZ | rplB | pull down |
| yeaO | rplB | pull down |
| yecA | rplB | pull down |
| yecF | rplB | pull down |
| yedF | rplB | pull down |
| yedK | rplB | pull down |
| yeil | rplB | pull down |
| yejH | rplB | pull down |
| yfaA | rplB | pull down |
| yfbM | rplB | pull down |

|      |      |           |
|------|------|-----------|
| yfcL | rplB | pull down |
| yfcZ | rplB | pull down |
| yfdP | rplB | pull down |
| yfdS | rplB | pull down |
| yfeD | rplB | pull down |
| yffB | rplB | pull down |
| yfgD | rplB | pull down |
| yfiF | rplB | pull down |
| yfiF | rplB | pull down |
| yfiF | rplB | pull down |
| yfiH | rplB | pull down |
| yfjF | rplB | pull down |
| ygaP | rplB | pull down |
| ygaV | rplB | pull down |
| ygcF | rplB | pull down |
| ygcK | rplB | pull down |
| ygeV | rplB | pull down |
| ygfH | rplB | pull down |
| yggE | rplB | pull down |
| yggL | rplB | pull down |
| yggS | rplB | pull down |
| ygiC | rplB | pull down |
| ygjM | rplB | pull down |
| ygiR | rplB | pull down |
| yhbJ | rplB | pull down |
| yhbP | rplB | pull down |
| yhbQ | rplB | pull down |
| yhbS | rplB | pull down |
| yhbY | rplB | pull down |
| yhbY | rplB | pull down |
| yhcO | rplB | pull down |
| yhiN | rplB | pull down |
| yihI | rplB | pull down |
| yihI | rplB | pull down |
| yjaA | rplB | pull down |
| yjaG | rplB | pull down |
| yjgA | rplB | pull down |
| yjgR | rplB | pull down |
| ykfJ | rplB | pull down |
| yliJ | rplB | pull down |
| ymgA | rplB | pull down |
| ymjA | rplB | pull down |
| ynbC | rplB | pull down |
| yneG | rplB | pull down |
| ynjA | rplB | pull down |

|      |      |           |
|------|------|-----------|
| yobA | rplB | pull down |
| yobB | rplB | pull down |
| ypeA | rplB | pull down |
| yqcA | rplB | pull down |
| yqgE | rplB | pull down |
| yqiB | rplB | pull down |
| yraN | rplB | pull down |
| znuC | rplB | pull down |

|      |      |           |
|------|------|-----------|
| add  | rplT | pull down |
| elaB | rplT | pull down |
| fis  | rplT | pull down |
| ftsA | rplT | pull down |
| hfq  | rplT | pull down |
| hscA | rplT | pull down |
| iclR | rplT | pull down |
| waaA | rplT | pull down |
| lon  | rplT | pull down |
| lpxA | rplT | pull down |
| lpxD | rplT | pull down |
| paaX | rplT | pull down |
| ybeZ | rplT | pull down |
| rcaA | rplT | pull down |
| ribH | rplT | pull down |
| rlmN | rplT | pull down |
| rluC | rplT | pull down |
| rnpA | rplT | pull down |
| rnr  | rplT | pull down |
| rppH | rplT | pull down |
| selB | rplT | pull down |
| srlR | rplT | pull down |
| tgt  | rplT | pull down |
| uvrC | rplT | pull down |
| vsr  | rplT | pull down |
| ybaB | rplT | pull down |
| ybcJ | rplT | pull down |
| ybjX | rplT | pull down |
| ycbK | rplT | pull down |
| ydcP | rplT | pull down |
| yfiF | rplT | pull down |
| ygfZ | rplT | pull down |
| yhbY | rplT | pull down |
| yibL | rplT | pull down |

|      |      |           |
|------|------|-----------|
| accD | rplU | pull down |
|------|------|-----------|



|       |      |           |
|-------|------|-----------|
| aidB  | rplU | pull down |
| allR  | rplU | pull down |
| birA  | rplU | pull down |
| clpA  | rplU | pull down |
| clpB  | rplU | pull down |
| clpP  | rplU | pull down |
| cspC  | rplU | pull down |
| cspE  | rplU | pull down |
| hupB  | rplU | pull down |
| dcm   | rplU | pull down |
| deadD | rplU | pull down |
| era   | rplU | pull down |
| fadI  | rplU | pull down |
| fimB  | rplU | pull down |
| ftsA  | rplU | pull down |
| ftsE  | rplU | pull down |
| ftsH  | rplU | pull down |
| helD  | rplU | pull down |
| hfq   | rplU | pull down |
| holD  | rplU | pull down |
| hslV  | rplU | pull down |
| iclR  | rplU | pull down |
| ihfB  | rplU | pull down |
| gsk   | rplU | pull down |
| kdsA  | rplU | pull down |
| waaA  | rplU | pull down |
| lola  | rplU | pull down |
| lon   | rplU | pull down |
| lpxA  | rplU | pull down |
| lpxD  | rplU | pull down |
| lpxD  | rplU | pull down |
| maa   | rplU | pull down |
| moaA  | rplU | pull down |
| npdA  | rplU | pull down |
| nrdR  | rplU | pull down |
| paaX  | rplU | pull down |
| ybeZ  | rplU | pull down |
| malP  | rplU | pull down |
| pnp   | rplU | pull down |
| pssA  | rplU | pull down |
| pyrH  | rplU | pull down |
| rcaA  | rplU | pull down |
| rhlB  | rplU | pull down |
| ribD  | rplU | pull down |
| ribH  | rplU | pull down |

|      |      |           |
|------|------|-----------|
| rlmN | rplU | pull down |
| rluB | rplU | pull down |
| rluC | rplU | pull down |
| rluC | rplU | pull down |
| rne  | rplU | pull down |
| rnpA | rplU | pull down |
| rnr  | rplU | pull down |
| rpoA | rplU | pull down |
| rpoD | rplU | pull down |
| rppH | rplU | pull down |
| selB | rplU | pull down |
| skp  | rplU | pull down |
| spoT | rplU | pull down |
| srlR | rplU | pull down |
| glyQ | rplU | pull down |
| tgt  | rplU | pull down |
| ulaR | rplU | pull down |
| uvrC | rplU | pull down |
| yacl | rplU | pull down |
| ybcJ | rplU | pull down |
| ybhK | rplU | pull down |
| ybjX | rplU | pull down |
| ygcP | rplU | pull down |
| yhbY | rplU | pull down |

|      |      |           |
|------|------|-----------|
| accA | rplV | pull down |
| accD | rplV | pull down |
| acpP | rplV | pull down |
| aidB | rplV | pull down |
| map  | rplV | pull down |
| birA | rplV | pull down |
| cbpA | rplV | pull down |
| cbrC | rplV | pull down |
| cheA | rplV | pull down |
| clpB | rplV | pull down |
| cspB | rplV | pull down |
| cspC | rplV | pull down |
| cspG | rplV | pull down |
| dcm  | rplV | pull down |
| deaD | rplV | pull down |
| deaD | rplV | pull down |
| dam  | rplV | pull down |
| dnaA | rplV | pull down |
| dnaJ | rplV | pull down |
| dtd  | rplV | pull down |

|      |      |           |
|------|------|-----------|
| dusC | rplV | pull down |
| fabZ | rplV | pull down |
| fdhE | rplV | pull down |
| fimB | rplV | pull down |
| fis  | rplV | pull down |
| fldA | rplV | pull down |
| ftsE | rplV | pull down |
| fucU | rplV | pull down |
| glmM | rplV | pull down |
| glmS | rplV | pull down |
| hfq  | rplV | pull down |
| hns  | rplV | pull down |
| holA | rplV | pull down |
| holC | rplV | pull down |
| hslR | rplV | pull down |
| hslV | rplV | pull down |
| hslV | rplV | pull down |
| iclR | rplV | pull down |
| ihfB | rplV | pull down |
| ppa  | rplV | pull down |
| kdsA | rplV | pull down |
| kdsA | rplV | pull down |
| waaA | rplV | pull down |
| lepA | rplV | pull down |
| lldD | rplV | pull down |
| lolA | rplV | pull down |
| lon  | rplV | pull down |
| lpxA | rplV | pull down |
| lpxD | rplV | pull down |
| macA | rplV | pull down |
| hybC | rplV | pull down |
| mnmE | rplV | pull down |
| moaC | rplV | pull down |
| mukB | rplV | pull down |
| murA | rplV | pull down |
| nlpA | rplV | pull down |
| nusA | rplV | pull down |
| nusA | rplV | pull down |
| nusG | rplV | pull down |
| paaX | rplV | pull down |
| parC | rplV | pull down |
| ybeZ | rplV | pull down |
| ybeZ | rplV | pull down |
| malP | rplV | pull down |
| plsB | rplV | pull down |

|      |      |           |
|------|------|-----------|
| pncB | rplV | pull down |
| pnP  | rplV | pull down |
| ppiC | rplV | pull down |
| pth  | rplV | pull down |
| manX | rplV | pull down |
| pyrH | rplV | pull down |
| rCSA | rplV | pull down |
| rCSB | rplV | pull down |
| recJ | rplV | pull down |
| rhIB | rplV | pull down |
| rhIB | rplV | pull down |
| rimN | rplV | pull down |
| ribH | rplV | pull down |
| rlmB | rplV | pull down |
| rlmE | rplV | pull down |
| rlmN | rplV | pull down |
| rlmN | rplV | pull down |
| rluB | rplV | pull down |
| rluC | rplV | pull down |
| rluC | rplV | pull down |
| rne  | rplV | pull down |
| rne  | rplV | pull down |
| rnpA | rplV | pull down |
| rnr  | rplV | pull down |
| rpoB | rplV | pull down |
| rpoC | rplV | pull down |
| rpoD | rplV | pull down |
| rppH | rplV | pull down |
| rppH | rplV | pull down |
| rsgA | rplV | pull down |
| secA | rplV | pull down |
| selB | rplV | pull down |
| skp  | rplV | pull down |
| spoT | rplV | pull down |
| spoT | rplV | pull down |
| srlR | rplV | pull down |
| srmB | rplV | pull down |
| srmB | rplV | pull down |
| glyQ | rplV | pull down |
| thrS | rplV | pull down |
| trpS | rplV | pull down |
| tgt  | rplV | pull down |
| tig  | rplV | pull down |
| trmB | rplV | pull down |
| trmB | rplV | pull down |

|       |      |           |
|-------|------|-----------|
| ubiG  | rplV | pull down |
| ulaR  | rplV | pull down |
| uvrC  | rplV | pull down |
| uvrD  | rplV | pull down |
| yaclL | rplV | pull down |
| ybcJ  | rplV | pull down |
| ybhK  | rplV | pull down |
| ybjX  | rplV | pull down |
| ydcP  | rplV | pull down |
| yeeZ  | rplV | pull down |
| yfiF  | rplV | pull down |
| yfiQ  | rplV | pull down |
| ygcP  | rplV | pull down |
| yhbJ  | rplV | pull down |
| yibL  | rplV | pull down |
| znuC  | rplV | pull down |

|      |      |           |
|------|------|-----------|
| accA | rplW | pull down |
| map  | rplW | pull down |
| atpG | rplW | pull down |
| cspC | rplW | pull down |
| deaD | rplW | pull down |
| dnaA | rplW | pull down |
| dnaB | rplW | pull down |
| dnaJ | rplW | pull down |
| dps  | rplW | pull down |
| dut  | rplW | pull down |
| eno  | rplW | pull down |
| fis  | rplW | pull down |
| garD | rplW | pull down |
| gyrB | rplW | pull down |
| hoIE | rplW | pull down |
| ihfB | rplW | pull down |
| napD | rplW | pull down |
| nusG | rplW | pull down |
| ppiC | rplW | pull down |
| pssA | rplW | pull down |
| ptrA | rplW | pull down |
| pyrH | rplW | pull down |
| rcaA | rplW | pull down |
| rimN | rplW | pull down |
| rlmN | rplW | pull down |
| rne  | rplW | pull down |
| rnr  | rplW | pull down |
| rpoA | rplW | pull down |

|      |      |           |
|------|------|-----------|
| rpoZ | rplW | pull down |
| rsgA | rplW | pull down |
| ruvA | rplW | pull down |
| slyD | rplW | pull down |
| srlR | rplW | pull down |
| srmB | rplW | pull down |
| leuS | rplW | pull down |
| tig  | rplW | pull down |
| uspG | rplW | pull down |
| uvrD | rplW | pull down |
| yaeB | rplW | pull down |
| ybeL | rplW | pull down |
| ybgC | rplW | pull down |
| ybhK | rplW | pull down |
| ydiE | rplW | pull down |
| yfjK | rplW | pull down |
| ygcN | rplW | pull down |
| yicC | rplW | pull down |
| yjgL | rplW | pull down |

|      |      |           |
|------|------|-----------|
| allR | rplX | pull down |
| cbpA | rplX | pull down |
| cspC | rplX | pull down |
| cspD | rplX | pull down |
| cspE | rplX | pull down |
| deaD | rplX | pull down |
| dnaA | rplX | pull down |
| dnaJ | rplX | pull down |
| dps  | rplX | pull down |
| fimB | rplX | pull down |
| hfq  | rplX | pull down |
| hns  | rplX | pull down |
| hslV | rplX | pull down |
| iclR | rplX | pull down |
| kdsA | rplX | pull down |
| kdsA | rplX | pull down |
| lepA | rplX | pull down |
| lpxA | rplX | pull down |
| lpxD | rplX | pull down |
| murG | rplX | pull down |
| nusA | rplX | pull down |
| ybeZ | rplX | pull down |
| ybeZ | rplX | pull down |
| plsB | rplX | pull down |
| pnp  | rplX | pull down |

|      |      |                  |
|------|------|------------------|
| rlmN | rplX | pull down        |
| rlmN | rplX | pull down        |
| rluB | rplX | pull down        |
| rluC | rplX | pull down        |
| rluC | rplX | pull down        |
| rne  | rplX | pull down        |
| rnpA | rplX | pull down        |
| rnr  | rplX | pull down        |
| rpoA | rplX | pull down        |
| rpoC | rplX | pull down        |
| rppH | rplX | pull down        |
| selB | rplX | pull down        |
| skp  | rplX | pull down        |
| spoT | rplX | pull down        |
| srmB | rplX | pull down        |
| srmB | rplX | pull down        |
| smpB | rplX | pull down        |
| tgt  | rplX | pull down        |
| trmB | rplX | pull down        |
| ybcJ | rplX | pull down        |
| ybjX | rplX | pull down        |
| ydcP | rplX | pull down        |
| yjeN | rplX | pull down        |
|      |      |                  |
| kdsA | rplY | pull down        |
| ybeZ | rplY | pull down        |
| rluB | rplY | pull down        |
| rppH | rplY | pull down        |
| selB | rplY | pull down        |
| thiG | rplY | pull down        |
| uvrC | rplY | pull down        |
| ypeA | rplY | pull down        |
|      |      |                  |
| clpA | rpmA | pull down        |
| deaD | rpmA | pull down        |
| gyrA | rpmA | two hybrid array |
| mtfA | rpmA | pull down        |
| parC | rpmA | pull down        |
| pyrH | rpmA | pull down        |
| rlmN | rpmA | pull down        |
| rpoA | rpmA | pull down        |
| slyD | rpmA | pull down        |
| ybeL | rpmA | pull down        |
|      |      |                  |
| ackA | rpmB | pull down        |

|      |      |           |
|------|------|-----------|
| acpP | rpmB | pull down |
| adhE | rpmB | pull down |
| aidB | rpmB | pull down |
| map  | rpmB | pull down |
| araF | rpmB | pull down |
| aroM | rpmB | pull down |
| atpC | rpmB | pull down |
| cheA | rpmB | pull down |
| chpR | rpmB | pull down |
| clpP | rpmB | pull down |
| deaD | rpmB | pull down |
| dnaA | rpmB | pull down |
| fadI | rpmB | pull down |
| fdhD | rpmB | pull down |
| fimB | rpmB | pull down |
| fldA | rpmB | pull down |
| fliL | rpmB | pull down |
| flxA | rpmB | pull down |
| gpmA | rpmB | pull down |
| hfq  | rpmB | pull down |
| holB | rpmB | pull down |
| holC | rpmB | pull down |
| holD | rpmB | pull down |
| hslR | rpmB | pull down |
| ilvM | rpmB | pull down |
| intQ | rpmB | pull down |
| ppa  | rpmB | pull down |
| kdsA | rpmB | pull down |
| lldD | rpmB | pull down |
| lpxA | rpmB | pull down |
| macA | rpmB | pull down |
| manB | rpmB | pull down |
| hybC | rpmB | pull down |
| mngB | rpmB | pull down |
| mngR | rpmB | pull down |
| moaB | rpmB | pull down |
| moaC | rpmB | pull down |
| moaC | rpmB | pull down |
| moaE | rpmB | pull down |
| modF | rpmB | pull down |
| msyB | rpmB | pull down |
| mukB | rpmB | pull down |
| nagC | rpmB | pull down |
| napA | rpmB | pull down |
| nfi  | rpmB | pull down |



|      |      |                                    |
|------|------|------------------------------------|
| nusG | rpmB | pull down                          |
| paaX | rpmB | pull down                          |
| paaX | rpmB | pull down                          |
| pdhR | rpmB | pull down                          |
| ybeZ | rpmB | pull down                          |
| plsB | rpmB | pull down                          |
| pth  | rpmB | pull down                          |
| manX | rpmB | pull down                          |
| raiA | rpmB | pull down                          |
| rcsB | rpmB | pull down                          |
| recJ | rpmB | pull down                          |
| recQ | rpmB | pull down                          |
| rhIB | rpmB | pull down                          |
| rhIE | rpmB | pull down                          |
| rlmB | rpmB | pull down                          |
| rlmN | rpmB | pull down                          |
| rluB | rpmB | pull down                          |
| rluC | rpmB | pull down                          |
| rne  | rpmB | affinity chromatography technology |
| rne  | rpmB | affinity chromatography technology |
| rnhA | rpmB | pull down                          |
| rpoA | rpmB | pull down                          |
| rpoD | rpmB | pull down                          |
| rppH | rpmB | pull down                          |
| rutR | rpmB | pull down                          |
| selB | rpmB | pull down                          |
| spoT | rpmB | pull down                          |
| smpB | rpmB | pull down                          |
| glyQ | rpmB | pull down                          |
| tgt  | rpmB | pull down                          |
| thiG | rpmB | pull down                          |
| thiL | rpmB | pull down                          |
| tig  | rpmB | pull down                          |
| tig  | rpmB | pull down                          |
| tolA | rpmB | pull down                          |
| tpiA | rpmB | pull down                          |
| ubiC | rpmB | pull down                          |
| ulaR | rpmB | pull down                          |
| uspC | rpmB | pull down                          |
| uvrB | rpmB | pull down                          |
| uvrC | rpmB | pull down                          |
| wzb  | rpmB | pull down                          |
| yacl | rpmB | pull down                          |
| ybcM | rpmB | pull down                          |
| ybjX | rpmB | pull down                          |

|      |      |           |
|------|------|-----------|
| ydfW | rpmB | pull down |
| yfgD | rpmB | pull down |
| yfhM | rpmB | pull down |
| yfiQ | rpmB | pull down |
| ygcO | rpmB | pull down |
| yggL | rpmB | pull down |
| ygiF | rpmB | pull down |
| yhjR | rpmB | pull down |
| yibL | rpmB | pull down |
| yifN | rpmB | pull down |
| yjjU | rpmB | pull down |
| ykfJ | rpmB | pull down |
| ykgD | rpmB | pull down |
| ymgC | rpmB | pull down |
| ypeA | rpmB | pull down |
| yraN | rpmB | pull down |

|      |      |           |
|------|------|-----------|
| accA | rplC | pull down |
| accC | rplC | pull down |
| aidB | rplC | pull down |
| aidB | rplC | pull down |
| cbpA | rplC | pull down |
| cca  | rplC | pull down |
| cedA | rplC | pull down |
| clpA | rplC | pull down |
| clpB | rplC | pull down |
| clpP | rplC | pull down |
| coaD | rplC | pull down |
| crp  | rplC | pull down |
| cspA | rplC | pull down |
| cspA | rplC | pull down |
| cspA | rplC | pull down |
| cspB | rplC | pull down |
| cspC | rplC | pull down |
| cspC | rplC | pull down |
| cspD | rplC | pull down |
| cspD | rplC | pull down |
| cspE | rplC | pull down |
| cspE | rplC | pull down |
| cspG | rplC | pull down |
| hupB | rplC | pull down |
| hupB | rplC | pull down |
| dcm  | rplC | pull down |
| dcyD | rplC | pull down |
| deaD | rplC | pull down |

|      |      |           |
|------|------|-----------|
| dnaA | rplC | pull down |
| dsbG | rplC | pull down |
| dtd  | rplC | pull down |
| fabZ | rplC | pull down |
| fimB | rplC | pull down |
| fis  | rplC | pull down |
| fkpB | rplC | pull down |
| greB | rplC | pull down |
| helD | rplC | pull down |
| hfq  | rplC | pull down |
| hfq  | rplC | pull down |
| hldD | rplC | pull down |
| hofQ | rplC | pull down |
| holB | rplC | pull down |
| holC | rplC | pull down |
| holC | rplC | pull down |
| holD | rplC | pull down |
| hslO | rplC | pull down |
| hslU | rplC | pull down |
| hslV | rplC | pull down |
| hslV | rplC | pull down |
| ihfA | rplC | pull down |
| ihfB | rplC | pull down |
| ppa  | rplC | pull down |
| ispA | rplC | pull down |
| kdsA | rplC | pull down |
| cadA | rplC | pull down |
| lon  | rplC | pull down |
| lpxA | rplC | pull down |
| lpxD | rplC | pull down |
| mcbR | rplC | pull down |
| mdh  | rplC | pull down |
| mnmE | rplC | pull down |
| mreB | rplC | pull down |
| mukB | rplC | pull down |
| murR | rplC | pull down |
| nfi  | rplC | pull down |
| nfuA | rplC | pull down |
| nusA | rplC | pull down |
| nusB | rplC | pull down |
| paaX | rplC | pull down |
| ybeZ | rplC | pull down |
| ybeZ | rplC | pull down |
| malP | rplC | pull down |
| malP | rplC | pull down |

|      |      |           |
|------|------|-----------|
| plsB | rplC | pull down |
| plsB | rplC | pull down |
| priC | rplC | pull down |
| pssA | rplC | pull down |
| pyrH | rplC | pull down |
| rapA | rplC | pull down |
| rcaA | rplC | pull down |
| rcaB | rplC | pull down |
| rhlB | rplC | pull down |
| rhlB | rplC | pull down |
| rhlE | rplC | pull down |
| rho  | rplC | pull down |
| ribD | rplC | pull down |
| ribH | rplC | pull down |
| ribH | rplC | pull down |
| rlmB | rplC | pull down |
| rlmE | rplC | pull down |
| rlmL | rplC | pull down |
| rlmN | rplC | pull down |
| rlmN | rplC | pull down |
| rlmN | rplC | pull down |
| rluB | rplC | pull down |
| rluB | rplC | pull down |
| rluC | rplC | pull down |
| rluC | rplC | pull down |
| rne  | rplC | pull down |
| rne  | rplC | pull down |
| rnpA | rplC | pull down |
| rnpA | rplC | pull down |
| rnr  | rplC | pull down |
| rnr  | rplC | pull down |
| rpoA | rplC | pull down |
| rpoC | rplC | pull down |
| rpoC | rplC | pull down |
| rppH | rplC | pull down |
| rppH | rplC | pull down |
| rppH | rplC | pull down |
| rsgA | rplC | pull down |
| rsmB | rplC | pull down |
| rsmH | rplC | pull down |
| rtcB | rplC | pull down |
| selB | rplC | pull down |
| selB | rplC | pull down |
| sfsA | rplC | pull down |
| spoT | rplC | pull down |

|      |      |           |
|------|------|-----------|
| spoT | rplC | pull down |
| srlR | rplC | pull down |
| leuS | rplC | pull down |
| thrS | rplC | pull down |
| trpS | rplC | pull down |
| tgt  | rplC | pull down |
| tig  | rplC | pull down |
| tig  | rplC | pull down |
| trkA | rplC | pull down |
| trmB | rplC | pull down |
| ulaR | rplC | pull down |
| ulaR | rplC | pull down |
| uvrC | rplC | pull down |
| uvrC | rplC | pull down |
| uvrD | rplC | pull down |
| yacL | rplC | pull down |
| yaeJ | rplC | pull down |
| ybcJ | rplC | pull down |
| ybcJ | rplC | pull down |
| ybgC | rplC | pull down |
| ybhK | rplC | pull down |
| ybjX | rplC | pull down |
| ybjX | rplC | pull down |
| ydcP | rplC | pull down |
| yejF | rplC | pull down |
| yfcB | rplC | pull down |
| yfcB | rplC | pull down |
| yfiF | rplC | pull down |
| yfiF | rplC | pull down |
| yfiQ | rplC | pull down |
| yfjK | rplC | pull down |
| ygcP | rplC | pull down |
| yhbY | rplC | pull down |
| yhfX | rplC | pull down |
| yhiR | rplC | pull down |
| yibL | rplC | pull down |
| yihI | rplC | pull down |
| yjgA | rplC | pull down |
| yneG | rplC | pull down |

|      |      |           |
|------|------|-----------|
| mngR | rpmF | pull down |
| yaaX | rpmF | pull down |
| yggL | rpmF | pull down |

|      |      |           |
|------|------|-----------|
| ymgC | rpmF | pull down |
| accD | rpmG | pull down |
| map  | rpmG | pull down |
| cbpA | rpmG | pull down |
| clpA | rpmG | pull down |
| clpP | rpmG | pull down |
| clpX | rpmG | pull down |
| dnaK | rpmG | pull down |
| fis  | rpmG | pull down |
| grpE | rpmG | pull down |
| hda  | rpmG | pull down |
| holA | rpmG | pull down |
| holC | rpmG | pull down |
| hscB | rpmG | pull down |
| hslV | rpmG | pull down |
| htpG | rpmG | pull down |
| ihfB | rpmG | pull down |
| ispA | rpmG | pull down |
| kdsA | rpmG | pull down |
| waaA | rpmG | pull down |
| lpxA | rpmG | pull down |
| lpxD | rpmG | pull down |
| mnmE | rpmG | pull down |
| murG | rpmG | pull down |
| parC | rpmG | pull down |
| ybeZ | rpmG | pull down |
| plsB | rpmG | pull down |
| pth  | rpmG | pull down |
| pyrH | rpmG | pull down |
| rcaA | rpmG | pull down |
| ribH | rpmG | pull down |
| rlmB | rpmG | pull down |
| rpiB | rpmG | pull down |
| rpoA | rpmG | pull down |
| rpoB | rpmG | pull down |
| rsgA | rpmG | pull down |
| srlR | rpmG | pull down |
| ybcJ | rpmG | pull down |
| ybjX | rpmG | pull down |
| ydcP | rpmG | pull down |
| ygcP | rpmG | pull down |
| ygiM | rpmG | pull down |
| znuC | rpmG | pull down |

|      |      |           |
|------|------|-----------|
| acpS | rplD | pull down |
| melA | rplD | pull down |
| amiA | rplD | pull down |
| map  | rplD | pull down |
| appY | rplD | pull down |
| cbpA | rplD | pull down |
| cbpA | rplD | pull down |
| cheR | rplD | pull down |
| clpA | rplD | pull down |
| clpP | rplD | pull down |
| coaD | rplD | pull down |
| cspA | rplD | pull down |
| cspB | rplD | pull down |
| cspC | rplD | pull down |
| cspC | rplD | pull down |
| cspE | rplD | pull down |
| cspE | rplD | pull down |
| cspG | rplD | pull down |
| cspl | rplD | pull down |
| cysK | rplD | pull down |
| damX | rplD | pull down |
| hupA | rplD | pull down |
| dctR | rplD | pull down |
| dcyD | rplD | pull down |
| dead | rplD | pull down |
| def  | rplD | pull down |
| der  | rplD | pull down |
| dam  | rplD | pull down |
| dnaA | rplD | pull down |
| dnaB | rplD | pull down |
| dnaK | rplD | pull down |
| eutK | rplD | pull down |
| eutP | rplD | pull down |
| eutQ | rplD | pull down |
| eutS | rplD | pull down |
| fabZ | rplD | pull down |
| fis  | rplD | pull down |
| fliG | rplD | pull down |
| fliS | rplD | pull down |
| fmt  | rplD | pull down |
| ftsH | rplD | pull down |
| grcA | rplD | pull down |
| greA | rplD | pull down |

|       |      |           |
|-------|------|-----------|
| grpE  | rplD | pull down |
| helD  | rplD | pull down |
| hfq   | rplD | pull down |
| hfq   | rplD | pull down |
| holC  | rplD | pull down |
| holC  | rplD | pull down |
| hslR  | rplD | pull down |
| hslU  | rplD | pull down |
| hslV  | rplD | pull down |
| hslV  | rplD | pull down |
| iclR  | rplD | pull down |
| ihfB  | rplD | pull down |
| intD  | rplD | pull down |
| ppa   | rplD | pull down |
| ppa   | rplD | pull down |
| iscX  | rplD | pull down |
| ispH  | rplD | pull down |
| kbl   | rplD | pull down |
| kdsA  | rplD | pull down |
| kdsB  | rplD | pull down |
| lepA  | rplD | pull down |
| lpxD  | rplD | pull down |
| lpxD  | rplD | pull down |
| lpxD  | rplD | pull down |
| lpxH  | rplD | pull down |
| miaB  | rplD | pull down |
| mnmeE | rplD | pull down |
| mug   | rplD | pull down |
| mukB  | rplD | pull down |
| murA  | rplD | pull down |
| murR  | rplD | pull down |
| nfi   | rplD | pull down |
| norV  | rplD | pull down |
| nuoE  | rplD | pull down |
| nusA  | rplD | pull down |
| nusG  | rplD | pull down |
| osmF  | rplD | pull down |
| parE  | rplD | pull down |
| ybeZ  | rplD | pull down |
| ybeZ  | rplD | pull down |
| malP  | rplD | pull down |
| plsB  | rplD | pull down |
| pnp   | rplD | pull down |
| pnp   | rplD | pull down |
| ppiC  | rplD | pull down |



|      |      |           |
|------|------|-----------|
| pth  | rplD | pull down |
| pyrH | rplD | pull down |
| rbsB | rplD | pull down |
| rcaA | rplD | pull down |
| recG | rplD | pull down |
| recJ | rplD | pull down |
| relA | rplD | pull down |
| rhaS | rplD | pull down |
| rhIE | rplD | pull down |
| rho  | rplD | pull down |
| ribD | rplD | pull down |
| ribF | rplD | pull down |
| ribB | rplD | pull down |
| ribH | rplD | pull down |
| rlmE | rplD | pull down |
| rlmM | rplD | pull down |
| rlmN | rplD | pull down |
| rlmN | rplD | pull down |
| rluB | rplD | pull down |
| rluB | rplD | pull down |
| rluC | rplD | pull down |
| rluC | rplD | pull down |
| rne  | rplD | pull down |
| rne  | rplD | pull down |
| rnpA | rplD | pull down |
| rnR  | rplD | pull down |
| rnR  | rplD | pull down |
| rpoA | rplD | pull down |
| rpoA | rplD | pull down |
| rpoB | rplD | pull down |
| rpoC | rplD | pull down |
| rpoD | rplD | pull down |
| rpoD | rplD | pull down |
| rpoD | rplD | pull down |
| rppH | rplD | pull down |
| rppH | rplD | pull down |
| rsgA | rplD | pull down |
| rsmB | rplD | pull down |
| rsmC | rplD | pull down |
| sdiA | rplD | pull down |
| secA | rplD | pull down |
| selB | rplD | pull down |
| spoT | rplD | pull down |
| spoT | rplD | pull down |
| srIR | rplD | pull down |

|      |      |           |
|------|------|-----------|
| srmB | rplD | pull down |
| srmB | rplD | pull down |
| sspB | rplD | pull down |
| suhB | rplD | pull down |
| gltX | rplD | pull down |
| glyQ | rplD | pull down |
| leuS | rplD | pull down |
| tgt  | rplD | pull down |
| tig  | rplD | pull down |
| tig  | rplD | pull down |
| treC | rplD | pull down |
| trmB | rplD | pull down |
| trpE | rplD | pull down |
| tusE | rplD | pull down |
| ulaR | rplD | pull down |
| uspF | rplD | pull down |
| uvrC | rplD | pull down |
| xdhB | rplD | pull down |
| yacl | rplD | pull down |
| yaeJ | rplD | pull down |
| ybaZ | rplD | pull down |
| ybcJ | rplD | pull down |
| ybeB | rplD | pull down |
| ybhK | rplD | pull down |
| ybjX | rplD | pull down |
| ybjX | rplD | pull down |
| ychJ | rplD | pull down |
| yciH | rplD | pull down |
| yebE | rplD | pull down |
| yebG | rplD | pull down |
| yecA | rplD | pull down |
| yegL | rplD | pull down |
| yfcU | rplD | pull down |
| yfdS | rplD | pull down |
| yfeZ | rplD | pull down |
| yffB | rplD | pull down |
| yfhA | rplD | pull down |
| yfjF | rplD | pull down |
| ygck | rplD | pull down |
| ygcP | rplD | pull down |
| ygdL | rplD | pull down |
| ygiC | rplD | pull down |
| yhaK | rplD | pull down |
| yhbQ | rplD | pull down |
| yhbY | rplD | pull down |

|      |      |           |
|------|------|-----------|
| yhhY | rplD | pull down |
| yhiR | rplD | pull down |
| yihI | rplD | pull down |
| yiiS | rplD | pull down |
| yjbM | rplD | pull down |
| yjcF | rplD | pull down |
| ymgA | rplD | pull down |
| yneG | rplD | pull down |
| yobB | rplD | pull down |
| yohF | rplD | pull down |
| znuC | rplD | pull down |
| znuC | rplD | pull down |

|      |      |           |
|------|------|-----------|
| atpD | rplE | pull down |
| btuE | rplE | pull down |
| cbpA | rplE | pull down |
| clpA | rplE | pull down |
| clpP | rplE | pull down |
| cspC | rplE | pull down |
| cspC | rplE | pull down |
| dmlR | rplE | pull down |
| fabZ | rplE | pull down |
| fdhE | rplE | pull down |
| fecl | rplE | pull down |
| ftsZ | rplE | pull down |
| fxsA | rplE | pull down |
| greA | rplE | pull down |
| hscA | rplE | pull down |
| ihfA | rplE | pull down |
| ihfB | rplE | pull down |
| kdsA | rplE | pull down |
| waaA | rplE | pull down |
| cadA | rplE | pull down |
| minC | rplE | pull down |
| minE | rplE | pull down |
| mreB | rplE | pull down |
| nrdH | rplE | pull down |
| nusA | rplE | pull down |
| nusG | rplE | pull down |
| obgE | rplE | pull down |
| ybeZ | rplE | pull down |
| ybeZ | rplE | pull down |
| pnp  | rplE | pull down |
| psuG | rplE | pull down |
| fruB | rplE | pull down |

|      |      |           |
|------|------|-----------|
| chbA | rplE | pull down |
| pyrH | rplE | pull down |
| rcaA | rplE | pull down |
| rcaB | rplE | pull down |
| rhaS | rplE | pull down |
| ribD | rplE | pull down |
| rlmN | rplE | pull down |
| rlmN | rplE | pull down |
| rluB | rplE | pull down |
| rluC | rplE | pull down |
| rpoA | rplE | pull down |
| rpoD | rplE | pull down |
| rppH | rplE | pull down |
| skp  | rplE | pull down |
| slyD | rplE | pull down |
| srlR | rplE | pull down |
| sspB | rplE | pull down |
| tig  | rplE | pull down |
| trmB | rplE | pull down |
| uspF | rplE | pull down |
| ybjX | rplE | pull down |
| ybjX | rplE | pull down |
| yceD | rplE | pull down |
| ycgL | rplE | pull down |
| ycgY | rplE | pull down |
| ychJ | rplE | pull down |
| ydhZ | rplE | pull down |
| ydiZ | rplE | pull down |
| yfcl | rplE | pull down |
| yfdK | rplE | pull down |
| yhcO | rplE | pull down |
| yjbM | rplE | pull down |
| ymgA | rplE | pull down |

|      |      |           |
|------|------|-----------|
| acpS | rplF | pull down |
| atpD | rplF | pull down |
| bgIX | rplF | pull down |
| cbpA | rplF | pull down |
| deaD | rplF | pull down |
| dmlR | rplF | pull down |
| dnaK | rplF | pull down |
| entB | rplF | pull down |
| eutT | rplF | pull down |
| fabZ | rplF | pull down |
| fdhE | rplF | pull down |

|      |      |           |
|------|------|-----------|
| fecl | rplF | pull down |
| fliK | rplF | pull down |
| fre  | rplF | pull down |
| gadE | rplF | pull down |
| glpQ | rplF | pull down |
| glpX | rplF | pull down |
| hscA | rplF | pull down |
| hscC | rplF | pull down |
| kdsA | rplF | pull down |
| lpxA | rplF | pull down |
| lpxA | rplF | pull down |
| minE | rplF | pull down |
| moaD | rplF | pull down |
| mutH | rplF | pull down |
| nudK | rplF | pull down |
| nusA | rplF | pull down |
| osmY | rplF | pull down |
| ybeZ | rplF | pull down |
| ybeZ | rplF | pull down |
| phoP | rplF | pull down |
| plsB | rplF | pull down |
| pnp  | rplF | pull down |
| priC | rplF | pull down |
| psuG | rplF | pull down |
| pta  | rplF | pull down |
| fruB | rplF | pull down |
| rlmB | rplF | pull down |
| rlmN | rplF | pull down |
| rluB | rplF | pull down |
| rluC | rplF | pull down |
| rluC | rplF | pull down |
| rnpA | rplF | pull down |
| rnr  | rplF | pull down |
| rnz  | rplF | pull down |
| rpoA | rplF | pull down |
| rppH | rplF | pull down |
| rppH | rplF | pull down |
| slyD | rplF | pull down |
| sspB | rplF | pull down |
| smpB | rplF | pull down |
| smpB | rplF | pull down |
| glyQ | rplF | pull down |
| tig  | rplF | pull down |
| tig  | rplF | pull down |
| trmB | rplF | pull down |

|      |      |           |
|------|------|-----------|
| trpE | rplF | pull down |
| wcaA | rplF | pull down |
| ybcJ | rplF | pull down |
| ybjX | rplF | pull down |
| ybjX | rplF | pull down |
| yceD | rplF | pull down |
| ycgL | rplF | pull down |
| ycgZ | rplF | pull down |
| ydaY | rplF | pull down |
| ydhZ | rplF | pull down |
| yebG | rplF | pull down |
| yecA | rplF | pull down |
| yfaL | rplF | pull down |
| yfcD | rplF | pull down |
| yfcl | rplF | pull down |
| yfdS | rplF | pull down |
| yfiF | rplF | pull down |
| yfjF | rplF | pull down |
| yggW | rplF | pull down |
| yihI | rplF | pull down |
| yiiS | rplF | pull down |
| ymgA | rplF | pull down |
| yobA | rplF | pull down |
| ypjB | rplF | pull down |

|      |      |           |
|------|------|-----------|
| map  | rplL | pull down |
| cbpA | rplL | pull down |
| clpA | rplL | pull down |
| clpP | rplL | pull down |
| clpX | rplL | pull down |
| coaD | rplL | pull down |
| crp  | rplL | pull down |
| cspA | rplL | pull down |
| cspB | rplL | pull down |
| cspG | rplL | pull down |
| dnaA | rplL | pull down |
| dnaB | rplL | pull down |
| ligA | rplL | pull down |
| ftsA | rplL | pull down |
| ftsH | rplL | pull down |
| fucU | rplL | pull down |
| gcp  | rplL | pull down |
| glmM | rplL | pull down |
| grpE | rplL | pull down |
| hda  | rplL | pull down |

|      |      |           |
|------|------|-----------|
| helD | rplL | pull down |
| hfq  | rplL | pull down |
| holA | rplL | pull down |
| holC | rplL | pull down |
| holD | rplL | pull down |
| holE | rplL | pull down |
| hrpB | rplL | pull down |
| hscA | rplL | pull down |
| hscB | rplL | pull down |
| hslU | rplL | pull down |
| hslV | rplL | pull down |
| ilvB | rplL | pull down |
| ispA | rplL | pull down |
| ispH | rplL | pull down |
| kbaY | rplL | pull down |
| kdsA | rplL | pull down |
| kdsB | rplL | pull down |
| waaA | rplL | pull down |
| tmk  | rplL | pull down |
| lolA | rplL | pull down |
| lpxA | rplL | pull down |
| lpxD | rplL | pull down |
| hybC | rplL | pull down |
| miaF | rplL | pull down |
| moaD | rplL | pull down |
| mukB | rplL | pull down |
| murA | rplL | pull down |
| murC | rplL | pull down |
| murG | rplL | pull down |
| murI | rplL | pull down |
| narJ | rplL | pull down |
| nfi  | rplL | pull down |
| nikR | rplL | pull down |
| nrdR | rplL | pull down |
| nusG | rplL | pull down |
| obgE | rplL | pull down |
| parC | rplL | pull down |
| ybeZ | rplL | pull down |
| plsB | rplL | pull down |
| ppiC | rplL | pull down |
| dnaG | rplL | pull down |
| pssA | rplL | pull down |
| pth  | rplL | pull down |
| pyrH | rplL | pull down |
| queC | rplL | pull down |

|      |      |           |
|------|------|-----------|
| rarA | rplL | pull down |
| ravA | rplL | pull down |
| rho  | rplL | pull down |
| rlmN | rplL | pull down |
| rluC | rplL | pull down |
| rne  | rplL | pull down |
| rnpA | rplL | pull down |
| rpiB | rplL | pull down |
| rpoA | rplL | pull down |
| rpoB | rplL | pull down |
| rpoD | rplL | pull down |
| rpoZ | rplL | pull down |
| rsgA | rplL | pull down |
| rsmH | rplL | pull down |
| yqgF | rplL | pull down |
| secA | rplL | pull down |
| selB | rplL | pull down |
| spoT | rplL | pull down |
| srmB | rplL | pull down |
| surA | rplL | pull down |
| leuS | rplL | pull down |
| tgt  | rplL | pull down |
| tig  | rplL | pull down |
| trmA | rplL | pull down |
| tusA | rplL | pull down |
| ulaR | rplL | pull down |
| usg  | rplL | pull down |
| uspG | rplL | pull down |
| uvrD | rplL | pull down |
| uvrY | rplL | pull down |
| ybaK | rplL | pull down |
| ybaZ | rplL | pull down |
| ybcJ | rplL | pull down |
| ybeB | rplL | pull down |
| ybjX | rplL | pull down |
| yccU | rplL | pull down |
| yceA | rplL | pull down |
| ycgF | rplL | pull down |
| ydcP | rplL | pull down |
| ydjI | rplL | pull down |
| yfbM | rplL | pull down |
| yfhM | rplL | pull down |
| yfjK | rplL | pull down |
| yiiD | rplL | pull down |
| yjeE | rplL | pull down |



|      |      |                                                   |
|------|------|---------------------------------------------------|
| znuC | rplL | pull down                                         |
| map  | rplI | pull down                                         |
| atpA | rplI | comigration in non denaturing gel electrophoresis |
| cbpA | rplI | pull down                                         |
| clpA | rplI | pull down                                         |
| cspC | rplI | pull down                                         |
| hupB | rplI | pull down                                         |
| deaD | rplI | pull down                                         |
| deaD | rplI | pull down                                         |
| dnaK | rplI | pull down                                         |
| eno  | rplI | pull down                                         |
| fabZ | rplI | pull down                                         |
| fmt  | rplI | pull down                                         |
| hfq  | rplI | pull down                                         |
| hrpA | rplI | pull down                                         |
| hslR | rplI | pull down                                         |
| hslV | rplI | pull down                                         |
| intA | rplI | pull down                                         |
| ppa  | rplI | pull down                                         |
| kdsA | rplI | pull down                                         |
| lepA | rplI | pull down                                         |
| lon  | rplI | pull down                                         |
| lon  | rplI | pull down                                         |
| lpxD | rplI | pull down                                         |
| lpxD | rplI | pull down                                         |
| mukB | rplI | pull down                                         |
| pgk  | rplI | pull down                                         |
| ybeZ | rplI | pull down                                         |
| ybeZ | rplI | pull down                                         |
| phrB | rplI | pull down                                         |
| malP | rplI | pull down                                         |
| plsB | rplI | pull down                                         |
| pnp  | rplI | pull down                                         |
| pnp  | rplI | pull down                                         |
| pyrH | rplI | pull down                                         |
| rcsB | rplI | pull down                                         |
| rhIB | rplI | pull down                                         |
| rlmB | rplI | pull down                                         |
| rlmN | rplI | pull down                                         |
| rlmN | rplI | pull down                                         |
| rluB | rplI | pull down                                         |
| rluB | rplI | pull down                                         |
| rluC | rplI | pull down                                         |
| rluC | rplI | pull down                                         |

|      |      |                                    |
|------|------|------------------------------------|
| rne  | rplI | pull down                          |
| rne  | rplI | affinity chromatography technology |
| rnpA | rplI | pull down                          |
| rnr  | rplI | pull down                          |
| rnr  | rplI | pull down                          |
| rpoC | rplI | pull down                          |
| rppH | rplI | pull down                          |
| rppH | rplI | pull down                          |
| selB | rplI | pull down                          |
| skp  | rplI | pull down                          |
| spoT | rplI | pull down                          |
| sspA | rplI | pull down                          |
| thrS | rplI | pull down                          |
| tgt  | rplI | pull down                          |
| tgt  | rplI | pull down                          |
| trmB | rplI | pull down                          |
| uvrC | rplI | pull down                          |
| ybcJ | rplI | pull down                          |
| ybcJ | rplI | pull down                          |
| ybjX | rplI | pull down                          |
| ydcP | rplI | pull down                          |
| yfiF | rplI | pull down                          |
| yhiN | rplI | pull down                          |

|      |      |           |
|------|------|-----------|
| cybC | rlmL | pull down |
| katE | rlmL | pull down |
| cspA | rlmL | pull down |
| cspC | rlmL | pull down |
| cspD | rlmL | pull down |
| cspE | rlmL | pull down |
| deaD | rlmL | pull down |
| fabI | rlmL | pull down |
| hfq  | rlmL | pull down |
| lpxD | rlmL | pull down |
| manA | rlmL | pull down |
| ybeZ | rlmL | pull down |
| pssA | rlmL | pull down |
| rlmN | rlmL | pull down |
| rluB | rlmL | pull down |
| rluC | rlmL | pull down |
| rluC | rlmL | pull down |
| rne  | rlmL | pull down |
| rnpA | rlmL | pull down |

|      |      |           |
|------|------|-----------|
| rnr  | rlmL | pull down |
| rppH | rlmL | pull down |
| srmB | rlmL | pull down |
| tgt  | rlmL | pull down |
| trmB | rlmL | pull down |
| ybcJ | rlmL | pull down |
| yebG | rlmL | pull down |
| yfiF | rlmL | pull down |
| ygiF | rlmL | pull down |
| yihI | rlmL | pull down |

|      |      |           |
|------|------|-----------|
| yedK | rlmM | pull down |
|------|------|-----------|

|      |      |           |
|------|------|-----------|
| tpiA | rlmN | pull down |
|------|------|-----------|

|      |      |           |
|------|------|-----------|
| betB | rluB | pull down |
| cbrC | rluB | pull down |
| cspA | rluB | pull down |
| cspC | rluB | pull down |
| cspD | rluB | pull down |
| cspE | rluB | pull down |
| hupA | rluB | pull down |
| deaD | rluB | pull down |
| deaD | rluB | pull down |
| hfq  | rluB | pull down |
| hslV | rluB | pull down |
| lpxD | rluB | pull down |
| mobA | rluB | pull down |
| ybeZ | rluB | pull down |
| plsB | rluB | pull down |
| pnp  | rluB | pull down |
| prsA | rluB | pull down |
| rlmN | rluB | pull down |
| rlmN | rluB | pull down |
| rluC | rluB | pull down |
| rluC | rluB | pull down |
| rne  | rluB | pull down |
| rnpA | rluB | pull down |
| rppH | rluB | pull down |
| selB | rluB | pull down |
| spoT | rluB | pull down |
| srmB | rluB | pull down |
| tgt  | rluB | pull down |

|      |      |           |
|------|------|-----------|
| topA | rluB | pull down |
| ybcJ | rluB | pull down |
| ybcJ | rluB | pull down |
| ybjX | rluB | pull down |
| yfiF | rluB | pull down |
| yhbY | rluB | pull down |

|      |      |           |
|------|------|-----------|
| cspA | rluC | pull down |
| cspC | rluC | pull down |
| cspD | rluC | pull down |
| mdtN | rluC | pull down |
| ybiY | rluC | pull down |
| rnr  | rluC | pull down |
| rppH | rluC | pull down |
| uspF | rluC | pull down |
| ybcJ | rluC | pull down |
| yfiF | rluC | pull down |
| yhbY | rluC | pull down |

|      |       |           |
|------|-------|-----------|
| atpA | rmlA1 | pull down |
| cobS | rmlA1 | pull down |
| rfbD | rmlA1 | pull down |

|      |      |           |
|------|------|-----------|
| clpX | rfbB | pull down |
|------|------|-----------|

|      |     |           |
|------|-----|-----------|
| leuO | rnb | pull down |
| rnc  | rnb | pull down |
| ydeU | rnb | pull down |

|      |     |                                        |
|------|-----|----------------------------------------|
| dnaK | rne | anti tag coimmunoprecipitation         |
| eno  | rne | pull down                              |
| eno  | rne | pull down                              |
| eno  | rne | footprinting                           |
| eno  | rne | mass spectrometry studies of complexes |
| hfq  | rne | pull down                              |

|      |     |                                        |
|------|-----|----------------------------------------|
| oxaA | rne | pull down                              |
| pgk  | rne | pull down                              |
| pnp  | rne | pull down                              |
| pnp  | rne | pull down                              |
| pnp  | rne | mass spectrometry studies of complexes |
| purH | rne | pull down                              |
| rhIB | rne | pull down                              |
| rhIB | rne | pull down                              |
| rhIB | rne | cross-linking study                    |
| rhIB | rne | molecular sieving                      |
| rhIB | rne | mass spectrometry studies of complexes |
| rlmN | rne | pull down                              |
| ilvA | rne | pull down                              |
| trmA | rne | pull down                              |
| ybcJ | rne | pull down                              |
| yecA | rne | pull down                              |
|      |     |                                        |
| hfq  | rng | pull down                              |
| infC | rng | pull down                              |
| ydeU | rng | pull down                              |
|      |     |                                        |
| elaB | rna | pull down                              |
|      |     |                                        |
| cspC | rnr | pull down                              |
| cspD | rnr | pull down                              |
| cspE | rnr | pull down                              |
| deaD | rnr | pull down                              |
| deaD | rnr | pull down                              |
| hfq  | rnr | pull down                              |
| hfq  | rnr | pull down                              |
| ybeZ | rnr | pull down                              |
| rplD | rnr | pull down                              |
| rlmN | rnr | pull down                              |
| rlmN | rnr | pull down                              |
| rluB | rnr | pull down                              |
| rluB | rnr | pull down                              |
| rluC | rnr | pull down                              |
| rluC | rnr | pull down                              |
| rne  | rnr | pull down                              |
| rppH | rnr | pull down                              |
| selB | rnr | pull down                              |
| skp  | rnr | pull down                              |
| ybcJ | rnr | pull down                              |
| ybcJ | rnr | pull down                              |
| ybjX | rnr | pull down                              |

|      |     |           |
|------|-----|-----------|
| yfiF | rnr | pull down |
| envY | rob | pull down |
| hfq  | rob | pull down |
| topA | rob | pull down |
| ydjF | rob | pull down |
| yfaS | rob | pull down |
| yfdQ | rob | pull down |

|       |      |           |
|-------|------|-----------|
| cedA  | rpoA | pull down |
| cedA  | rpoA | pull down |
| coaBC | rpoA | pull down |
| cspA  | rpoA | pull down |
| hupA  | rpoA | pull down |
| hupB  | rpoA | pull down |
| polA  | rpoA | pull down |
| polA  | rpoA | pull down |
| ebgC  | rpoA | pull down |
| fecl  | rpoA | pull down |
| fliA  | rpoA | pull down |
| gapA  | rpoA | pull down |
| gcp   | rpoA | pull down |
| greA  | rpoA | pull down |
| greB  | rpoA | pull down |
| hfq   | rpoA | pull down |
| nfi   | rpoA | pull down |
| nusA  | rpoA | pull down |
| nusA  | rpoA | pull down |
| nusG  | rpoA | pull down |
| nusG  | rpoA | pull down |
| nusG  | rpoA | pull down |
| obgE  | rpoA | pull down |
| pnp   | rpoA | pull down |
| rapA  | rpoA | pull down |
| rpsB  | rpoA | pull down |
| prfB  | rpoA | pull down |
| rpoH  | rpoA | pull down |
| rpoH  | rpoA | pull down |
| rpoN  | rpoA | pull down |
| rpoN  | rpoA | pull down |
| rpoN  | rpoA | pull down |
| rpoB  | rpoA | pull down |
| rpoB  | rpoA | pull down |

|      |      |           |
|------|------|-----------|
| rpoC | rpoA | pull down |
| rpoC | rpoA | pull down |
| rpoC | rpoA | pull down |
| rpoC | rpoA | pull down |
| rpoC | rpoA | pull down |
| rpoD | rpoA | pull down |
| rpoD | rpoA | pull down |
| rpoS | rpoA | pull down |
| rpoZ | rpoA | pull down |
| ssb  | rpoA | pull down |
| sspA | rpoA | pull down |
| topA | rpoA | pull down |
| tpiA | rpoA | pull down |
| usg  | rpoA | pull down |
| yacl | rpoA | pull down |
| yacl | rpoA | pull down |
| ybcJ | rpoA | pull down |
| yegD | rpoA | pull down |
| ygcP | rpoA | pull down |

|      |      |           |
|------|------|-----------|
| ade  | rpoB | pull down |
| cedA | rpoB | pull down |
| cedA | rpoB | pull down |
| clpA | rpoB | pull down |
| cspA | rpoB | pull down |
| cspE | rpoB | pull down |
| dctR | rpoB | pull down |
| dam  | rpoB | pull down |
| polA | rpoB | pull down |
| dppF | rpoB | pull down |
| elbB | rpoB | pull down |
| fabA | rpoB | pull down |
| fecl | rpoB | pull down |
| fkpB | rpoB | pull down |
| fliA | rpoB | pull down |
| gapA | rpoB | pull down |
| gcp  | rpoB | pull down |
| gcvP | rpoB | pull down |
| glnB | rpoB | pull down |
| greA | rpoB | pull down |
| greB | rpoB | pull down |
| hfq  | rpoB | pull down |
| hns  | rpoB | pull down |
| hscC | rpoB | pull down |
| ibpA | rpoB | pull down |

|      |      |                     |
|------|------|---------------------|
| cadA | rpoB | pull down           |
| mreB | rpoB | pull down           |
| norV | rpoB | pull down           |
| nusA | rpoB | pull down           |
| nusA | rpoB | pull down           |
| nusA | rpoB | pull down           |
| nusG | rpoB | pull down           |
| nusG | rpoB | pull down           |
| ppiB | rpoB | pull down           |
| pyrG | rpoB | pull down           |
| rapA | rpoB | pull down           |
| rhIE | rpoB | pull down           |
| rluC | rpoB | pull down           |
| rluC | rpoB | pull down           |
| rpoH | rpoB | pull down           |
| rpoH | rpoB | pull down           |
| rpoN | rpoB | pull down           |
| rpoN | rpoB | pull down           |
| rpoN | rpoB | pull down           |
| rpoA | rpoB | blue native page    |
| rpoA | rpoB | pull down           |
| rpoA | rpoB | pull down           |
| rpoA | rpoB | pull down           |
| rpoC | rpoB | pull down           |
| rpoC | rpoB | pull down           |
| rpoC | rpoB | pull down           |
| rpoC | rpoB | cross-linking study |
| rpoD | rpoB | pull down           |
| rpoD | rpoB | pull down           |
| rpoD | rpoB | pull down           |
| rpoE | rpoB | pull down           |
| rpoS | rpoB | pull down           |
| rpoZ | rpoB | pull down           |
| rpoZ | rpoB | pull down           |
| rpoZ | rpoB | pull down           |
| smg  | rpoB | pull down           |
| ssb  | rpoB | pull down           |
| sspA | rpoB | pull down           |
| lysU | rpoB | pull down           |
| tgt  | rpoB | pull down           |
| tig  | rpoB | pull down           |
| topA | rpoB | pull down           |
| tusA | rpoB | pull down           |
| usg  | rpoB | pull down           |
| uspG | rpoB | pull down           |



|      |      |           |
|------|------|-----------|
| uvrD | rpoB | pull down |
| wcaK | rpoB | pull down |
| yacl | rpoB | pull down |
| yacl | rpoB | pull down |
| ybeD | rpoB | pull down |
| ybhK | rpoB | pull down |
| yddE | rpoB | pull down |
| yegD | rpoB | pull down |
| yjfF | rpoB | pull down |
| yicC | rpoB | pull down |

|      |      |                                                   |
|------|------|---------------------------------------------------|
| cbpA | rpoC | pull down                                         |
| cedA | rpoC | pull down                                         |
| cedA | rpoC | pull down                                         |
| groL | rpoC | comigration in non denaturing gel electrophoresis |
| citX | rpoC | pull down                                         |
| clpA | rpoC | pull down                                         |
| clpP | rpoC | pull down                                         |
| cspA | rpoC | pull down                                         |
| cspE | rpoC | pull down                                         |
| dctR | rpoC | pull down                                         |
| dam  | rpoC | pull down                                         |
| dnaJ | rpoC | pull down                                         |
| polA | rpoC | pull down                                         |
| dnaX | rpoC | pull down                                         |
| fabA | rpoC | pull down                                         |
| fecA | rpoC | pull down                                         |
| fecl | rpoC | pull down                                         |
| fis  | rpoC | pull down                                         |
| fkpB | rpoC | pull down                                         |
| fliA | rpoC | pull down                                         |
| gapA | rpoC | pull down                                         |
| greA | rpoC | pull down                                         |
| greB | rpoC | pull down                                         |
| hfq  | rpoC | pull down                                         |
| hns  | rpoC | pull down                                         |
| holD | rpoC | pull down                                         |
| hscB | rpoC | pull down                                         |
| htpG | rpoC | pull down                                         |
| ibpA | rpoC | pull down                                         |
| ihfB | rpoC | pull down                                         |
| adk  | rpoC | pull down                                         |
| lpxD | rpoC | pull down                                         |
| mreB | rpoC | pull down                                         |
| nusA | rpoC | pull down                                         |

|      |      |                      |
|------|------|----------------------|
| nusA | rpoC | pull down            |
| nusA | rpoC | pull down            |
| nusG | rpoC | pull down            |
| nusG | rpoC | pull down            |
| pyrG | rpoC | pull down            |
| rapA | rpoC | pull down            |
| rapA | rpoC | pull down            |
| rhIE | rpoC | pull down            |
| rplD | rpoC | pull down            |
| rlmN | rpoC | pull down            |
| rluC | rpoC | pull down            |
| rluC | rpoC | pull down            |
| rpoH | rpoC | pull down            |
| rpoH | rpoC | pull down            |
| rpoN | rpoC | pull down            |
| rpoN | rpoC | pull down            |
| rpoA | rpoC | blue native page     |
| rpoA | rpoC | pull down            |
| rpoA | rpoC | pull down            |
| rpoA | rpoC | pull down            |
| rpoB | rpoC | pull down            |
| rpoB | rpoC | pull down            |
| rpoB | rpoC | pull down            |
| rpoD | rpoC | pull down            |
| rpoD | rpoC | pull down            |
| rpoD | rpoC | pull down            |
| rpoD | rpoC | far western blotting |
| rpoE | rpoC | pull down            |
| rpoS | rpoC | pull down            |
| rpoZ | rpoC | pull down            |
| rpoZ | rpoC | pull down            |
| rsd  | rpoC | pull down            |
| selD | rpoC | pull down            |
| smg  | rpoC | pull down            |
| speA | rpoC | pull down            |
| spoT | rpoC | pull down            |
| ssb  | rpoC | pull down            |
| sspA | rpoC | pull down            |
| aspS | rpoC | pull down            |
| lysU | rpoC | pull down            |
| ilvA | rpoC | pull down            |
| tig  | rpoC | pull down            |
| topA | rpoC | pull down            |
| topA | rpoC | pull down            |
| usg  | rpoC | pull down            |

|      |      |           |
|------|------|-----------|
| usg  | rpoC | pull down |
| usg  | rpoC | pull down |
| uspG | rpoC | pull down |
| xisE | rpoC | pull down |
| wcaK | rpoC | pull down |
| yacl | rpoC | pull down |
| yacl | rpoC | pull down |
| ybbO | rpoC | pull down |
| ybcJ | rpoC | pull down |
| ybeD | rpoC | pull down |
| ybjX | rpoC | pull down |
| yecA | rpoC | pull down |
| yegD | rpoC | pull down |
| yjfF | rpoC | pull down |
| ygcP | rpoC | pull down |

|      |      |           |
|------|------|-----------|
| cedA | rpoD | pull down |
| cedA | rpoD | pull down |
| gapA | rpoD | pull down |
| nusA | rpoD | pull down |
| rpoA | rpoD | pull down |
| rpoA | rpoD | pull down |
| rpoA | rpoD | pull down |
| rpoB | rpoD | pull down |
| rpoB | rpoD | pull down |
| rpoC | rpoD | pull down |
| rpoC | rpoD | pull down |
| rpoC | rpoD | pull down |
| rpoC | rpoD | pull down |
| rpoZ | rpoD | pull down |
| rpoZ | rpoD | pull down |
| rsd  | rpoD | pull down |

|      |      |           |
|------|------|-----------|
| ftsN | rraA | pull down |
|------|------|-----------|

|      |     |           |
|------|-----|-----------|
| ybcN | frr | pull down |
|------|-----|-----------|

|      |      |                  |
|------|------|------------------|
| cbpA | rpsA | pull down        |
| clpA | rpsA | pull down        |
| clpA | rpsA | pull down        |
| clpB | rpsA | blue native page |
| cspC | rpsA | pull down        |
| cspC | rpsA | pull down        |

|      |      |                  |
|------|------|------------------|
| cspD | rpsA | pull down        |
| cspE | rpsA | pull down        |
| dead | rpsA | pull down        |
| dead | rpsA | pull down        |
| deor | rpsA | pull down        |
| dnaK | rpsA | blue native page |
| eutC | rpsA | pull down        |
| fabA | rpsA | pull down        |
| fabI | rpsA | pull down        |
| fabZ | rpsA | pull down        |
| fliK | rpsA | pull down        |
| helD | rpsA | pull down        |
| hfq  | rpsA | pull down        |
| hfq  | rpsA | pull down        |
| holE | rpsA | pull down        |
| hrpA | rpsA | pull down        |
| ibpA | rpsA | pull down        |
| intA | rpsA | pull down        |
| kdsB | rpsA | pull down        |
| tdk  | rpsA | pull down        |
| mutL | rpsA | pull down        |
| ybeZ | rpsA | pull down        |
| priC | rpsA | pull down        |
| pssA | rpsA | pull down        |
| pyrH | rpsA | pull down        |
| rhIE | rpsA | pull down        |
| rlmN | rpsA | pull down        |
| rlmN | rpsA | pull down        |
| rluB | rpsA | pull down        |
| rluB | rpsA | pull down        |
| rluC | rpsA | pull down        |
| rnpA | rpsA | pull down        |
| rnr  | rpsA | pull down        |
| rpoA | rpsA | pull down        |
| rpoC | rpsA | pull down        |
| rpoD | rpsA | pull down        |
| rppH | rpsA | pull down        |
| rppH | rpsA | pull down        |
| rsgA | rpsA | pull down        |
| ruvB | rpsA | pull down        |
| selB | rpsA | pull down        |
| spoT | rpsA | pull down        |
| srlR | rpsA | pull down        |
| smpB | rpsA | pull down        |
| smpB | rpsA | pull down        |

|      |      |           |
|------|------|-----------|
| thrS | rpsA | pull down |
| tgt  | rpsA | pull down |
| tig  | rpsA | pull down |
| tig  | rpsA | pull down |
| tilS | rpsA | pull down |
| trmB | rpsA | pull down |
| trpE | rpsA | pull down |
| ubiG | rpsA | pull down |
| ulaR | rpsA | pull down |
| uvrC | rpsA | pull down |
| yacl | rpsA | pull down |
| ybcJ | rpsA | pull down |
| ybcJ | rpsA | pull down |
| ybjX | rpsA | pull down |
| ybjX | rpsA | pull down |
| ycaR | rpsA | pull down |
| ycgL | rpsA | pull down |
| ydcP | rpsA | pull down |
| yebG | rpsA | pull down |
| yfiQ | rpsA | pull down |
| yjeE | rpsA | pull down |
| ymgA | rpsA | pull down |

|      |      |           |
|------|------|-----------|
| map  | rpsJ | pull down |
| clpA | rpsJ | pull down |
| clpB | rpsJ | pull down |
| clpP | rpsJ | pull down |
| crp  | rpsJ | pull down |
| cspA | rpsJ | pull down |
| cspB | rpsJ | pull down |
| cspC | rpsJ | pull down |
| cspD | rpsJ | pull down |
| cspE | rpsJ | pull down |
| deaD | rpsJ | pull down |
| dnaA | rpsJ | pull down |
| dnaJ | rpsJ | pull down |
| dnaJ | rpsJ | pull down |
| dps  | rpsJ | pull down |
| dusC | rpsJ | pull down |
| fabI | rpsJ | pull down |
| fis  | rpsJ | pull down |
| fkpB | rpsJ | pull down |
| flxA | rpsJ | pull down |
| ftsE | rpsJ | pull down |
| ftsZ | rpsJ | pull down |

|      |      |           |
|------|------|-----------|
| gcp  | rpsJ | pull down |
| glmM | rpsJ | pull down |
| greA | rpsJ | pull down |
| hda  | rpsJ | pull down |
| holB | rpsJ | pull down |
| holC | rpsJ | pull down |
| holE | rpsJ | pull down |
| hslO | rpsJ | pull down |
| hslR | rpsJ | pull down |
| hslU | rpsJ | pull down |
| ppa  | rpsJ | pull down |
| ispA | rpsJ | pull down |
| ispF | rpsJ | pull down |
| kdsA | rpsJ | pull down |
| waaA | rpsJ | pull down |
| cadA | rpsJ | pull down |
| lepA | rpsJ | pull down |
| lola | rpsJ | pull down |
| lpxA | rpsJ | pull down |
| lpxD | rpsJ | pull down |
| hybC | rpsJ | pull down |
| mnmE | rpsJ | pull down |
| mukB | rpsJ | pull down |
| mukB | rpsJ | pull down |
| murA | rpsJ | pull down |
| nrdR | rpsJ | pull down |
| nusB | rpsJ | pull down |
| nusB | rpsJ | pull down |
| nusG | rpsJ | pull down |
| nusG | rpsJ | pull down |
| parC | rpsJ | pull down |
| plsB | rpsJ | pull down |
| pth  | rpsJ | pull down |
| pyrH | rpsJ | pull down |
| queC | rpsJ | pull down |
| rcsB | rpsJ | pull down |
| rhIB | rpsJ | pull down |
| rhIE | rpsJ | pull down |
| rimN | rpsJ | pull down |
| rlmB | rpsJ | pull down |
| rlmN | rpsJ | pull down |
| rlmN | rpsJ | pull down |
| rluB | rpsJ | pull down |
| rluB | rpsJ | pull down |
| rluD | rpsJ | pull down |

|      |      |           |
|------|------|-----------|
| rne  | rpsJ | pull down |
| rnpA | rpsJ | pull down |
| rpoA | rpsJ | pull down |
| rpoB | rpsJ | pull down |
| rpoB | rpsJ | pull down |
| rpoC | rpsJ | pull down |
| rpoZ | rpsJ | pull down |
| rsgA | rpsJ | pull down |
| rsmH | rpsJ | pull down |
| rsuA | rpsJ | pull down |
| rsuA | rpsJ | pull down |
| ruvB | rpsJ | pull down |
| spoT | rpsJ | pull down |
| leuS | rpsJ | pull down |
| thrS | rpsJ | pull down |
| tig  | rpsJ | pull down |
| ulaR | rpsJ | pull down |
| uvrC | rpsJ | pull down |
| yacl | rpsJ | pull down |
| yajD | rpsJ | pull down |
| ybaK | rpsJ | pull down |
| ybaZ | rpsJ | pull down |
| yceD | rpsJ | pull down |
| yciA | rpsJ | pull down |
| yciU | rpsJ | pull down |
| yfcB | rpsJ | pull down |
| yfhM | rpsJ | pull down |
| yfiQ | rpsJ | pull down |
| yggS | rpsJ | pull down |
| yifN | rpsJ | pull down |
|      |      |           |
| deaD | rpsK | pull down |
| kdsA | rpsK | pull down |
| rnpA | rpsK | pull down |
| rnr  | rpsK | pull down |
| spoT | rpsK | pull down |
| tig  | rpsK | pull down |
| uvrC | rpsK | pull down |
| yacl | rpsK | pull down |
| yfiF | rpsK | pull down |
|      |      |           |
| aidB | rpsL | pull down |
| allR | rpsL | pull down |
| atoC | rpsL | pull down |
| fkpB | rpsL | pull down |

|      |      |           |
|------|------|-----------|
| hslO | rpsL | pull down |
| paaX | rpsL | pull down |
| rnk  | rpsL | pull down |
| speE | rpsL | pull down |
| spoT | rpsL | pull down |
| tgt  | rpsL | pull down |
| ulaR | rpsL | pull down |
| uvrC | rpsL | pull down |
| yach | rpsL | pull down |
| yacl | rpsL | pull down |
| yacl | rpsL | pull down |
| yfiF | rpsL | pull down |

|      |      |           |
|------|------|-----------|
| aas  | rpsM | pull down |
| acpP | rpsM | pull down |
| add  | rpsM | pull down |
| allR | rpsM | pull down |
| cbpA | rpsM | pull down |
| cbrC | rpsM | pull down |
| cspB | rpsM | pull down |
| cspC | rpsM | pull down |
| cspC | rpsM | pull down |
| cspD | rpsM | pull down |
| cspG | rpsM | pull down |
| cspl | rpsM | pull down |
| hupB | rpsM | pull down |
| deaD | rpsM | pull down |
| deaD | rpsM | pull down |
| dam  | rpsM | pull down |
| dnaA | rpsM | pull down |
| dnaJ | rpsM | pull down |
| era  | rpsM | pull down |
| fabA | rpsM | pull down |
| fis  | rpsM | pull down |
| fliS | rpsM | pull down |
| fmt  | rpsM | pull down |
| garD | rpsM | pull down |
| hfq  | rpsM | pull down |
| hfq  | rpsM | pull down |
| hrpA | rpsM | pull down |
| hslV | rpsM | pull down |
| iclR | rpsM | pull down |
| ihfB | rpsM | pull down |
| inaA | rpsM | pull down |
| intA | rpsM | pull down |



|      |      |           |
|------|------|-----------|
| kdsA | rpsM | pull down |
| lpxD | rpsM | pull down |
| maa  | rpsM | pull down |
| mfd  | rpsM | pull down |
| msbB | rpsM | pull down |
| mtfA | rpsM | pull down |
| mutY | rpsM | pull down |
| narQ | rpsM | pull down |
| nfi  | rpsM | pull down |
| npdA | rpsM | pull down |
| pdxH | rpsM | pull down |
| ybeZ | rpsM | pull down |
| pnp  | rpsM | pull down |
| pnp  | rpsM | pull down |
| pssA | rpsM | pull down |
| racR | rpsM | pull down |
| rcsA | rpsM | pull down |
| recG | rpsM | pull down |
| relA | rpsM | pull down |
| rfaC | rpsM | pull down |
| rlmM | rpsM | pull down |
| rluB | rpsM | pull down |
| rluC | rpsM | pull down |
| rluC | rpsM | pull down |
| rluC | rpsM | pull down |
| rng  | rpsM | pull down |
| rnpA | rpsM | pull down |
| rnpA | rpsM | pull down |
| rnr  | rpsM | pull down |
| rnr  | rpsM | pull down |
| rpoA | rpsM | pull down |
| rpoC | rpsM | pull down |
| rpoZ | rpsM | pull down |
| rppH | rpsM | pull down |
| rppH | rpsM | pull down |
| rsgA | rpsM | pull down |
| rsmC | rpsM | pull down |
| rsuA | rpsM | pull down |
| rutR | rpsM | pull down |
| skp  | rpsM | pull down |
| glyQ | rpsM | pull down |
| thrS | rpsM | pull down |
| trmB | rpsM | pull down |
| ubiG | rpsM | pull down |
| ulaR | rpsM | pull down |

|      |      |           |
|------|------|-----------|
| ulaR | rpsM | pull down |
| uspC | rpsM | pull down |
| uspF | rpsM | pull down |
| uvrC | rpsM | pull down |
| uvrC | rpsM | pull down |
| uvrY | rpsM | pull down |
| wcaC | rpsM | pull down |
| wcaK | rpsM | pull down |
| wzb  | rpsM | pull down |
| yacL | rpsM | pull down |
| ybjX | rpsM | pull down |
| ycbK | rpsM | pull down |
| ydiE | rpsM | pull down |
| yecA | rpsM | pull down |
| yfbQ | rpsM | pull down |
| yfcH | rpsM | pull down |
| yfiF | rpsM | pull down |
| yfiF | rpsM | pull down |
| yfiQ | rpsM | pull down |
| yidB | rpsM | pull down |
| yiiS | rpsM | pull down |
| yjjU | rpsM | pull down |
| yneG | rpsM | pull down |
| yobB | rpsM | pull down |

|      |      |           |
|------|------|-----------|
| aidB | rpsN | pull down |
| allR | rpsN | pull down |
| birA | rpsN | pull down |
| clpA | rpsN | pull down |
| clpB | rpsN | pull down |
| cspA | rpsN | pull down |
| cspC | rpsN | pull down |
| cspD | rpsN | pull down |
| dcm  | rpsN | pull down |
| deaD | rpsN | pull down |
| dnaA | rpsN | pull down |
| dnaJ | rpsN | pull down |
| fimB | rpsN | pull down |
| fkpB | rpsN | pull down |
| hoIC | rpsN | pull down |
| hscB | rpsN | pull down |
| iclR | rpsN | pull down |
| intA | rpsN | pull down |
| ppa  | rpsN | pull down |
| kdsA | rpsN | pull down |

|       |      |           |
|-------|------|-----------|
| hybC  | rpsN | pull down |
| menB  | rpsN | pull down |
| mnmeE | rpsN | pull down |
| napA  | rpsN | pull down |
| nfi   | rpsN | pull down |
| npdA  | rpsN | pull down |
| npdA  | rpsN | pull down |
| nusG  | rpsN | pull down |
| pgk   | rpsN | pull down |
| ybeZ  | rpsN | pull down |
| pssA  | rpsN | pull down |
| rcaA  | rpsN | pull down |
| recQ  | rpsN | pull down |
| rlmN  | rpsN | pull down |
| rluB  | rpsN | pull down |
| rluC  | rpsN | pull down |
| rnhA  | rpsN | pull down |
| rnk   | rpsN | pull down |
| rnpA  | rpsN | pull down |
| rnr   | rpsN | pull down |
| rpoA  | rpsN | pull down |
| rpoB  | rpsN | pull down |
| rsgA  | rpsN | pull down |
| spoT  | rpsN | pull down |
| smpB  | rpsN | pull down |
| surA  | rpsN | pull down |
| thrS  | rpsN | pull down |
| tgt   | rpsN | pull down |
| tig   | rpsN | pull down |
| ulaR  | rpsN | pull down |
| uvrC  | rpsN | pull down |
| uvrD  | rpsN | pull down |
| yacl  | rpsN | pull down |
| ydcP  | rpsN | pull down |
| yebC  | rpsN | pull down |
| yecA  | rpsN | pull down |
| yfiF  | rpsN | pull down |
| yfiQ  | rpsN | pull down |
| yhbJ  | rpsN | pull down |
| yibL  | rpsN | pull down |
| allR  | rpsO | pull down |
| cedA  | rpsO | pull down |
| deaD  | rpsO | pull down |
| gmhB  | rpsO | pull down |

|      |      |           |
|------|------|-----------|
| hdhA | rpsO | pull down |
| nfi  | rpsO | pull down |
| pnp  | rpsO | pull down |
| rng  | rpsO | pull down |
| rnpA | rpsO | pull down |
| rnr  | rpsO | pull down |
| rpoA | rpsO | pull down |
| uvrC | rpsO | pull down |
| ydfW | rpsO | pull down |
| yfiF | rpsO | pull down |
| ygiM | rpsO | pull down |

|       |      |           |
|-------|------|-----------|
| map   | rpsP | pull down |
| cbpA  | rpsP | pull down |
| clpA  | rpsP | pull down |
| clpP  | rpsP | pull down |
| cspE  | rpsP | pull down |
| deadD | rpsP | pull down |
| fimB  | rpsP | pull down |
| ftsE  | rpsP | pull down |
| hfq   | rpsP | pull down |
| hoIB  | rpsP | pull down |
| hoIE  | rpsP | pull down |
| hslV  | rpsP | pull down |
| intA  | rpsP | pull down |
| lpxD  | rpsP | pull down |
| mukB  | rpsP | pull down |
| nusG  | rpsP | pull down |
| ybeZ  | rpsP | pull down |
| pyrH  | rpsP | pull down |
| ravA  | rpsP | pull down |
| recJ  | rpsP | pull down |
| rhlB  | rpsP | pull down |
| rimN  | rpsP | pull down |
| rlmN  | rpsP | pull down |
| rluB  | rpsP | pull down |
| rluC  | rpsP | pull down |
| rne   | rpsP | pull down |
| rnpA  | rpsP | pull down |
| rnr   | rpsP | pull down |
| rnr   | rpsP | pull down |
| rpoA  | rpsP | pull down |
| rpoC  | rpsP | pull down |
| rsgA  | rpsP | pull down |
| rsuA  | rpsP | pull down |

|      |      |           |
|------|------|-----------|
| spoT | rpsP | pull down |
| glyQ | rpsP | pull down |
| leuS | rpsP | pull down |
| trmB | rpsP | pull down |
| yfiF | rpsP | pull down |
| yicC | rpsP | pull down |

|      |      |           |
|------|------|-----------|
| deaD | rpsR | pull down |
| fabA | rpsR | pull down |
| fimB | rpsR | pull down |
| hfq  | rpsR | pull down |
| lpxD | rpsR | pull down |
| lpxD | rpsR | pull down |
| nfi  | rpsR | pull down |
| pnp  | rpsR | pull down |
| rhIE | rpsR | pull down |
| rlmN | rpsR | pull down |
| rluB | rpsR | pull down |
| rluC | rpsR | pull down |
| rnpA | rpsR | pull down |
| rnr  | rpsR | pull down |
| rppH | rpsR | pull down |
| spoT | rpsR | pull down |
| uvrC | rpsR | pull down |
| ybcM | rpsR | pull down |
| yfiF | rpsR | pull down |

|      |      |                  |
|------|------|------------------|
| aidB | rpsS | pull down        |
| cheA | rpsS | two hybrid array |
| deaD | rpsS | pull down        |
| gyrA | rpsS | two hybrid array |
| hrpA | rpsS | pull down        |
| ihfB | rpsS | pull down        |
| pmrD | rpsS | pull down        |
| pnp  | rpsS | pull down        |
| rhIB | rpsS | pull down        |
| rng  | rpsS | pull down        |
| rpoA | rpsS | pull down        |
| rppH | rpsS | pull down        |
| tig  | rpsS | pull down        |
| ulaR | rpsS | pull down        |
| uvrC | rpsS | pull down        |
| ybjX | rpsS | pull down        |

|      |      |           |
|------|------|-----------|
| yfiF | rpsS | pull down |
| yfiQ | rpsS | pull down |
| adhE | rpsB | pull down |
| aidB | rpsB | pull down |
| fbaA | rpsB | pull down |
| map  | rpsB | pull down |
| atpD | rpsB | pull down |
| btuE | rpsB | pull down |
| btuR | rpsB | pull down |
| cbpA | rpsB | pull down |
| cbpA | rpsB | pull down |
| cca  | rpsB | pull down |
| cheW | rpsB | pull down |
| cheY | rpsB | pull down |
| clpA | rpsB | pull down |
| clpA | rpsB | pull down |
| clpB | rpsB | pull down |
| clpP | rpsB | pull down |
| cspB | rpsB | pull down |
| cspC | rpsB | pull down |
| cspC | rpsB | pull down |
| cspD | rpsB | pull down |
| cspD | rpsB | pull down |
| cspG | rpsB | pull down |
| cutA | rpsB | pull down |
| dctR | rpsB | pull down |
| deaD | rpsB | pull down |
| deaD | rpsB | pull down |
| der  | rpsB | pull down |
| dmlR | rpsB | pull down |
| dnaA | rpsB | pull down |
| dnaA | rpsB | pull down |
| dnaB | rpsB | pull down |
| dnaB | rpsB | pull down |
| dnaJ | rpsB | pull down |
| dnaK | rpsB | pull down |
| dnaK | rpsB | pull down |
| ligA | rpsB | pull down |
| dsbA | rpsB | pull down |
| dusC | rpsB | pull down |
| edd  | rpsB | pull down |
| era  | rpsB | pull down |
| erpA | rpsB | pull down |
| fabA | rpsB | pull down |

|      |      |           |
|------|------|-----------|
| fabZ | rpsB | pull down |
| fdhD | rpsB | pull down |
| fis  | rpsB | pull down |
| fkpB | rpsB | pull down |
| fldA | rpsB | pull down |
| flgK | rpsB | pull down |
| fliH | rpsB | pull down |
| fliL | rpsB | pull down |
| frvX | rpsB | pull down |
| ftsA | rpsB | pull down |
| ftsE | rpsB | pull down |
| ftsZ | rpsB | pull down |
| gatD | rpsB | pull down |
| glmM | rpsB | pull down |
| glmU | rpsB | pull down |
| glnB | rpsB | pull down |
| greA | rpsB | pull down |
| greB | rpsB | pull down |
| grpE | rpsB | pull down |
| gyrA | rpsB | pull down |
| gyrA | rpsB | pull down |
| gyrB | rpsB | pull down |
| hda  | rpsB | pull down |
| hfq  | rpsB | pull down |
| hfq  | rpsB | pull down |
| hns  | rpsB | pull down |
| hns  | rpsB | pull down |
| hoIC | rpsB | pull down |
| hoIE | rpsB | pull down |
| hrpA | rpsB | pull down |
| hscB | rpsB | pull down |
| hscC | rpsB | pull down |
| hscC | rpsB | pull down |
| hslO | rpsB | pull down |
| hslR | rpsB | pull down |
| hslR | rpsB | pull down |
| hslU | rpsB | pull down |
| ibpA | rpsB | pull down |
| iclR | rpsB | pull down |
| ihfA | rpsB | pull down |
| ilvB | rpsB | pull down |
| ppa  | rpsB | pull down |
| ispA | rpsB | pull down |
| kdsA | rpsB | pull down |
| waaA | rpsB | pull down |

|      |      |           |
|------|------|-----------|
| cadA | rpsB | pull down |
| lepA | rpsB | pull down |
| lldD | rpsB | pull down |
| lon  | rpsB | pull down |
| lpxA | rpsB | pull down |
| lpxB | rpsB | pull down |
| lpxD | rpsB | pull down |
| lpxD | rpsB | pull down |
| hybC | rpsB | pull down |
| hybC | rpsB | pull down |
| minC | rpsB | pull down |
| mlaC | rpsB | pull down |
| mnmE | rpsB | pull down |
| mnmE | rpsB | pull down |
| msyB | rpsB | pull down |
| mukB | rpsB | pull down |
| mukB | rpsB | pull down |
| murA | rpsB | pull down |
| murC | rpsB | pull down |
| murE | rpsB | pull down |
| murG | rpsB | pull down |
| murI | rpsB | pull down |
| napD | rpsB | pull down |
| nusB | rpsB | pull down |
| nusG | rpsB | pull down |
| parC | rpsB | pull down |
| parE | rpsB | pull down |
| ybeZ | rpsB | pull down |
| ybeZ | rpsB | pull down |
| plsB | rpsB | pull down |
| pncB | rpsB | pull down |
| prmA | rpsB | pull down |
| pssA | rpsB | pull down |
| pth  | rpsB | pull down |
| pth  | rpsB | pull down |
| pyrH | rpsB | pull down |
| ravA | rpsB | pull down |
| rcaA | rpsB | pull down |
| recE | rpsB | pull down |
| rhaS | rpsB | pull down |
| rho  | rpsB | pull down |
| ribD | rpsB | pull down |
| rimN | rpsB | pull down |
| rlmB | rpsB | pull down |
| rlmE | rpsB | pull down |



|      |      |           |
|------|------|-----------|
| rlmH | rpsB | pull down |
| rlmN | rpsB | pull down |
| rlmN | rpsB | pull down |
| rluB | rpsB | pull down |
| rluC | rpsB | pull down |
| rluC | rpsB | pull down |
| rne  | rpsB | pull down |
| rng  | rpsB | pull down |
| rnpA | rpsB | pull down |
| rnpA | rpsB | pull down |
| rnr  | rpsB | pull down |
| rnr  | rpsB | pull down |
| rpoA | rpsB | pull down |
| rpoD | rpsB | pull down |
| rpoD | rpsB | pull down |
| rpoS | rpsB | pull down |
| rpoZ | rpsB | pull down |
| rppH | rpsB | pull down |
| rppH | rpsB | pull down |
| rsgA | rpsB | pull down |
| rsmG | rpsB | pull down |
| rsuA | rpsB | pull down |
| rtcR | rpsB | pull down |
| ruvB | rpsB | pull down |
| secA | rpsB | pull down |
| smg  | rpsB | pull down |
| speA | rpsB | pull down |
| spoT | rpsB | pull down |
| srlR | rpsB | pull down |
| srmB | rpsB | pull down |
| smpB | rpsB | pull down |
| smpB | rpsB | pull down |
| alaS | rpsB | pull down |
| pheT | rpsB | pull down |
| glyQ | rpsB | pull down |
| leuS | rpsB | pull down |
| thrS | rpsB | pull down |
| trpS | rpsB | pull down |
| tig  | rpsB | pull down |
| tig  | rpsB | pull down |
| tpiA | rpsB | pull down |
| trmB | rpsB | pull down |
| trpE | rpsB | pull down |
| ulaR | rpsB | pull down |
| uvrC | rpsB | pull down |

|      |      |           |
|------|------|-----------|
| uvrD | rpsB | pull down |
| ygdG | rpsB | pull down |
| yacl | rpsB | pull down |
| yafP | rpsB | pull down |
| ybaK | rpsB | pull down |
| ybaZ | rpsB | pull down |
| ybcJ | rpsB | pull down |
| ybcJ | rpsB | pull down |
| ybhK | rpsB | pull down |
| ybjX | rpsB | pull down |
| ybjX | rpsB | pull down |
| ycgL | rpsB | pull down |
| ycgY | rpsB | pull down |
| ychJ | rpsB | pull down |
| ycjZ | rpsB | pull down |
| ydhQ | rpsB | pull down |
| ydiZ | rpsB | pull down |
| yebR | rpsB | pull down |
| yecA | rpsB | pull down |
| yfaL | rpsB | pull down |
| yfhM | rpsB | pull down |
| yfiQ | rpsB | pull down |
| ygfA | rpsB | pull down |
| yggW | rpsB | pull down |
| yhbQ | rpsB | pull down |
| yhbY | rpsB | pull down |
| yibA | rpsB | pull down |
| yibL | rpsB | pull down |
| yicC | rpsB | pull down |
| yiiS | rpsB | pull down |
| yjeE | rpsB | pull down |
| yjeJ | rpsB | pull down |
| ymjA | rpsB | pull down |
| yqcA | rpsB | pull down |
| yqgE | rpsB | pull down |

|      |      |           |
|------|------|-----------|
| aidB | rpsT | pull down |
| allC | rpsT | pull down |
| map  | rpsT | pull down |
| cspC | rpsT | pull down |
| cspD | rpsT | pull down |
| dcm  | rpsT | pull down |
| deaD | rpsT | pull down |
| dicA | rpsT | pull down |
| dnaA | rpsT | pull down |

|      |      |           |
|------|------|-----------|
| fepE | rpsT | pull down |
| fimB | rpsT | pull down |
| grcA | rpsT | pull down |
| ppa  | rpsT | pull down |
| kdsA | rpsT | pull down |
| lpxA | rpsT | pull down |
| lpxD | rpsT | pull down |
| mntR | rpsT | pull down |
| npdA | rpsT | pull down |
| pgk  | rpsT | pull down |
| ybeZ | rpsT | pull down |
| pnp  | rpsT | pull down |
| chbA | rpsT | pull down |
| rhIB | rpsT | pull down |
| rhsE | rpsT | pull down |
| rluB | rpsT | pull down |
| rluC | rpsT | pull down |
| rne  | rpsT | pull down |
| rng  | rpsT | pull down |
| rnhA | rpsT | pull down |
| rnpA | rpsT | pull down |
| rnr  | rpsT | pull down |
| rpoA | rpsT | pull down |
| rpoB | rpsT | pull down |
| rpoZ | rpsT | pull down |
| rppH | rpsT | pull down |
| rsd  | rpsT | pull down |
| rutR | rpsT | pull down |
| selB | rpsT | pull down |
| soxS | rpsT | pull down |
| spoT | rpsT | pull down |
| supH | rpsT | pull down |
| thrS | rpsT | pull down |
| trmB | rpsT | pull down |
| ulaR | rpsT | pull down |
| uvrC | rpsT | pull down |
| yacl | rpsT | pull down |
| yagL | rpsT | pull down |
| ybjX | rpsT | pull down |
| yfiF | rpsT | pull down |
| yfiQ | rpsT | pull down |
| yheT | rpsT | pull down |
| yiiS | rpsT | pull down |
| yjjU | rpsT | pull down |

|      |      |           |
|------|------|-----------|
| clpA | rpsU | pull down |
| cspD | rpsU | pull down |
| deaD | rpsU | pull down |
| deaD | rpsU | pull down |
| pssA | rpsU | pull down |
| rpsB | rpsU | pull down |
| rlmB | rpsU | pull down |
| rluB | rpsU | pull down |
| rne  | rpsU | pull down |
| rng  | rpsU | pull down |
| rnpA | rpsU | pull down |
| rnr  | rpsU | pull down |
| rpoA | rpsU | pull down |
| rpoB | rpsU | pull down |
| tig  | rpsU | pull down |
| tig  | rpsU | pull down |
| trmB | rpsU | pull down |
| yacl | rpsU | pull down |
| yecA | rpsU | pull down |
| yfiF | rpsU | pull down |

|      |      |           |
|------|------|-----------|
| acpS | rpsC | pull down |
| ada  | rpsC | pull down |
| accB | rpsC | pull down |
| birA | rpsC | pull down |
| btuE | rpsC | pull down |
| cbpA | rpsC | pull down |
| cbrC | rpsC | pull down |
| cspA | rpsC | pull down |
| cspA | rpsC | pull down |
| cspB | rpsC | pull down |
| cspC | rpsC | pull down |
| cspC | rpsC | pull down |
| cspD | rpsC | pull down |
| cspG | rpsC | pull down |
| cutA | rpsC | pull down |
| dcm  | rpsC | pull down |
| dcyD | rpsC | pull down |
| deaD | rpsC | pull down |
| deaD | rpsC | pull down |
| der  | rpsC | pull down |
| ndh  | rpsC | pull down |
| diaA | rpsC | pull down |
| dam  | rpsC | pull down |
| dnaA | rpsC | pull down |

|      |      |           |
|------|------|-----------|
| fabZ | rpsC | pull down |
| fimB | rpsC | pull down |
| fimB | rpsC | pull down |
| fimB | rpsC | pull down |
| fis  | rpsC | pull down |
| fixA | rpsC | pull down |
| fkpB | rpsC | pull down |
| fldB | rpsC | pull down |
| fliA | rpsC | pull down |
| flxA | rpsC | pull down |
| fruR | rpsC | pull down |
| gadW | rpsC | pull down |
| gatD | rpsC | pull down |
| glmU | rpsC | pull down |
| glnA | rpsC | pull down |
| glpX | rpsC | pull down |
| hfq  | rpsC | pull down |
| holA | rpsC | pull down |
| hrpA | rpsC | pull down |
| hscA | rpsC | pull down |
| hscC | rpsC | pull down |
| hslO | rpsC | pull down |
| hslR | rpsC | pull down |
| htrB | rpsC | pull down |
| hyaF | rpsC | pull down |
| hycl | rpsC | pull down |
| iclR | rpsC | pull down |
| ihfB | rpsC | pull down |
| ppa  | rpsC | pull down |
| kdsA | rpsC | pull down |
| kdsA | rpsC | pull down |
| lon  | rpsC | pull down |
| lpxD | rpsC | pull down |
| lpxD | rpsC | pull down |
| lpxD | rpsC | pull down |
| mdtN | rpsC | pull down |
| meIR | rpsC | pull down |
| minC | rpsC | pull down |
| mqsR | rpsC | pull down |
| mtfA | rpsC | pull down |
| mug  | rpsC | pull down |
| mukB | rpsC | pull down |
| mutY | rpsC | pull down |
| nikE | rpsC | pull down |
| npdA | rpsC | pull down |

|      |      |           |
|------|------|-----------|
| nusA | rpsC | pull down |
| nusA | rpsC | pull down |
| nusG | rpsC | pull down |
| obgE | rpsC | pull down |
| mdoG | rpsC | pull down |
| ybeZ | rpsC | pull down |
| pinR | rpsC | pull down |
| plsB | rpsC | pull down |
| plsB | rpsC | pull down |
| pnp  | rpsC | pull down |
| priA | rpsC | pull down |
| priB | rpsC | pull down |
| pssA | rpsC | pull down |
| pyrH | rpsC | pull down |
| rcnR | rpsC | pull down |
| rpsB | rpsC | pull down |
| rpsB | rpsC | pull down |
| recG | rpsC | pull down |
| recO | rpsC | pull down |
| rfaF | rpsC | pull down |
| rfaG | rpsC | pull down |
| rfaY | rpsC | pull down |
| rhlB | rpsC | pull down |
| rimO | rpsC | pull down |
| rlmL | rpsC | pull down |
| rlmM | rpsC | pull down |
| rlmN | rpsC | pull down |
| rlmN | rpsC | pull down |
| rluB | rpsC | pull down |
| rluC | rpsC | pull down |
| rluC | rpsC | pull down |
| rluE | rpsC | pull down |
| rluF | rpsC | pull down |
| rne  | rpsC | pull down |
| rng  | rpsC | pull down |
| rnhA | rpsC | pull down |
| rnpA | rpsC | pull down |
| rnpA | rpsC | pull down |
| rnr  | rpsC | pull down |
| rpoA | rpsC | pull down |
| rpoB | rpsC | pull down |
| rpoC | rpsC | pull down |
| rpoD | rpsC | pull down |
| rppH | rpsC | pull down |
| rsgA | rpsC | pull down |

|      |      |           |
|------|------|-----------|
| rsmC | rpsC | pull down |
| yqgF | rpsC | pull down |
| secB | rpsC | pull down |
| selB | rpsC | pull down |
| smg  | rpsC | pull down |
| speA | rpsC | pull down |
| spoT | rpsC | pull down |
| spr  | rpsC | pull down |
| sprT | rpsC | pull down |
| srmB | rpsC | pull down |
| sspB | rpsC | pull down |
| smpB | rpsC | pull down |
| gltX | rpsC | pull down |
| glyQ | rpsC | pull down |
| thrS | rpsC | pull down |
| tig  | rpsC | pull down |
| tig  | rpsC | pull down |
| trmB | rpsC | pull down |
| trpE | rpsC | pull down |
| trpR | rpsC | pull down |
| ulaR | rpsC | pull down |
| usg  | rpsC | pull down |
| uvrC | rpsC | pull down |
| uvrC | rpsC | pull down |
| wcaA | rpsC | pull down |
| wcaK | rpsC | pull down |
| yacl | rpsC | pull down |
| yafP | rpsC | pull down |
| ybcJ | rpsC | pull down |
| ybcJ | rpsC | pull down |
| ybeY | rpsC | pull down |
| ybjX | rpsC | pull down |
| ybjX | rpsC | pull down |
| yceD | rpsC | pull down |
| ycfD | rpsC | pull down |
| ycgL | rpsC | pull down |
| ycgY | rpsC | pull down |
| ychJ | rpsC | pull down |
| yciH | rpsC | pull down |
| ydcP | rpsC | pull down |
| ydiE | rpsC | pull down |
| ydiH | rpsC | pull down |
| ydiZ | rpsC | pull down |
| yfcZ | rpsC | pull down |
| yfdS | rpsC | pull down |

|      |      |           |
|------|------|-----------|
| yfiF | rpsC | pull down |
| yfjF | rpsC | pull down |
| ygcl | rpsC | pull down |
| ygfF | rpsC | pull down |
| yggL | rpsC | pull down |
| ygiC | rpsC | pull down |
| ygiM | rpsC | pull down |
| yhbQ | rpsC | pull down |
| yhcO | rpsC | pull down |
| yjaA | rpsC | pull down |
| yjeE | rpsC | pull down |
| yjfl | rpsC | pull down |
| ymfD | rpsC | pull down |
| ymgA | rpsC | pull down |
| ymjA | rpsC | pull down |
| yneG | rpsC | pull down |
| ynjA | rpsC | pull down |
| ypeA | rpsC | pull down |
| ypjB | rpsC | pull down |

|      |      |           |
|------|------|-----------|
| aidB | rpsD | pull down |
| atoC | rpsD | pull down |
| cbpA | rpsD | pull down |
| cbrC | rpsD | pull down |
| chpR | rpsD | pull down |
| clpA | rpsD | pull down |
| cspA | rpsD | pull down |
| cspA | rpsD | pull down |
| cspB | rpsD | pull down |
| cspB | rpsD | pull down |
| cspC | rpsD | pull down |
| cspC | rpsD | pull down |
| cspC | rpsD | pull down |
| cspD | rpsD | pull down |
| cspD | rpsD | pull down |
| cspE | rpsD | pull down |
| cspE | rpsD | pull down |
| cspG | rpsD | pull down |
| cspl | rpsD | pull down |
| damX | rpsD | pull down |
| hupA | rpsD | pull down |
| hupB | rpsD | pull down |
| dctR | rpsD | pull down |
| dcyD | rpsD | pull down |
| deaD | rpsD | pull down |



|      |      |           |
|------|------|-----------|
| deaD | rpsD | pull down |
| degS | rpsD | pull down |
| dicA | rpsD | pull down |
| dinG | rpsD | pull down |
| dam  | rpsD | pull down |
| dsbC | rpsD | pull down |
| dsbG | rpsD | pull down |
| elaB | rpsD | pull down |
| entC | rpsD | pull down |
| era  | rpsD | pull down |
| era  | rpsD | pull down |
| eutJ | rpsD | pull down |
| fabZ | rpsD | pull down |
| fpr  | rpsD | pull down |
| fimB | rpsD | pull down |
| fis  | rpsD | pull down |
| fkpA | rpsD | pull down |
| fkpB | rpsD | pull down |
| fkpB | rpsD | pull down |
| fldB | rpsD | pull down |
| fliZ | rpsD | pull down |
| fmt  | rpsD | pull down |
| ftsZ | rpsD | pull down |
| glmU | rpsD | pull down |
| glpD | rpsD | pull down |
| hfq  | rpsD | pull down |
| hfq  | rpsD | pull down |
| hofQ | rpsD | pull down |
| hscA | rpsD | pull down |
| hscC | rpsD | pull down |
| hslR | rpsD | pull down |
| ihfA | rpsD | pull down |
| ihfA | rpsD | pull down |
| ihfB | rpsD | pull down |
| intD | rpsD | pull down |
| ispF | rpsD | pull down |
| kbaY | rpsD | pull down |
| kdsA | rpsD | pull down |
| lldD | rpsD | pull down |
| lpxA | rpsD | pull down |
| lpxD | rpsD | pull down |
| lpxD | rpsD | pull down |
| lpxD | rpsD | pull down |
| mcrA | rpsD | pull down |
| mdh  | rpsD | pull down |

|      |      |           |
|------|------|-----------|
| minC | rpsD | pull down |
| msyB | rpsD | pull down |
| mtfA | rpsD | pull down |
| murG | rpsD | pull down |
| murR | rpsD | pull down |
| narG | rpsD | pull down |
| nfuA | rpsD | pull down |
| nikE | rpsD | pull down |
| nlpA | rpsD | pull down |
| npdA | rpsD | pull down |
| npdA | rpsD | pull down |
| nrfG | rpsD | pull down |
| nusA | rpsD | pull down |
| nusA | rpsD | pull down |
| nusB | rpsD | pull down |
| obgE | rpsD | pull down |
| pabC | rpsD | pull down |
| panB | rpsD | pull down |
| ybeZ | rpsD | pull down |
| plsB | rpsD | pull down |
| plsB | rpsD | pull down |
| pncA | rpsD | pull down |
| pnp  | rpsD | pull down |
| priC | rpsD | pull down |
| prmA | rpsD | pull down |
| pssA | rpsD | pull down |
| pssA | rpsD | pull down |
| psuK | rpsD | pull down |
| racR | rpsD | pull down |
| rbsB | rpsD | pull down |
| recG | rpsD | pull down |
| rfaF | rpsD | pull down |
| rhaD | rpsD | pull down |
| rhIB | rpsD | pull down |
| rhIE | rpsD | pull down |
| ribD | rpsD | pull down |
| rimL | rpsD | pull down |
| rimO | rpsD | pull down |
| rlmE | rpsD | pull down |
| rlmL | rpsD | pull down |
| rlmN | rpsD | pull down |
| rlmN | rpsD | pull down |
| rluB | rpsD | pull down |
| rluC | rpsD | pull down |
| rluF | rpsD | pull down |

|      |      |           |
|------|------|-----------|
| rne  | rpsD | pull down |
| rne  | rpsD | pull down |
| rng  | rpsD | pull down |
| rnpA | rpsD | pull down |
| rnpA | rpsD | pull down |
| rnr  | rpsD | pull down |
| rnr  | rpsD | pull down |
| rpoA | rpsD | pull down |
| rpoA | rpsD | pull down |
| rpoC | rpsD | pull down |
| rpoC | rpsD | pull down |
| rpoD | rpsD | pull down |
| rpoE | rpsD | pull down |
| rppH | rpsD | pull down |
| rppH | rpsD | pull down |
| rsmB | rpsD | pull down |
| rsmC | rpsD | pull down |
| rsmE | rpsD | pull down |
| rsml | rpsD | pull down |
| rsuA | rpsD | pull down |
| rtcB | rpsD | pull down |
| selB | rpsD | pull down |
| selB | rpsD | pull down |
| sfsA | rpsD | pull down |
| sfsB | rpsD | pull down |
| slyD | rpsD | pull down |
| soxS | rpsD | pull down |
| speA | rpsD | pull down |
| spoT | rpsD | pull down |
| sspB | rpsD | pull down |
| stpA | rpsD | pull down |
| suhB | rpsD | pull down |
| trpS | rpsD | pull down |
| tauD | rpsD | pull down |
| thiK | rpsD | pull down |
| tig  | rpsD | pull down |
| trkA | rpsD | pull down |
| trmB | rpsD | pull down |
| ubiX | rpsD | pull down |
| ulaR | rpsD | pull down |
| ulaR | rpsD | pull down |
| uppS | rpsD | pull down |
| uvrC | rpsD | pull down |
| uvrC | rpsD | pull down |
| wcaK | rpsD | pull down |

|      |      |           |
|------|------|-----------|
| yacl | rpsD | pull down |
| yacl | rpsD | pull down |
| yaej | rpsD | pull down |
| ybcN | rpsD | pull down |
| ybeY | rpsD | pull down |
| ybgC | rpsD | pull down |
| ybhK | rpsD | pull down |
| ybiA | rpsD | pull down |
| ybjX | rpsD | pull down |
| ycfH | rpsD | pull down |
| ycgE | rpsD | pull down |
| ycgL | rpsD | pull down |
| ycgM | rpsD | pull down |
| ychG | rpsD | pull down |
| ychJ | rpsD | pull down |
| yciH | rpsD | pull down |
| ycjX | rpsD | pull down |
| yddJ | rpsD | pull down |
| ydfX | rpsD | pull down |
| ydhW | rpsD | pull down |
| ydiE | rpsD | pull down |
| ydiE | rpsD | pull down |
| ydjA | rpsD | pull down |
| ydjF | rpsD | pull down |
| yeaO | rpsD | pull down |
| yedK | rpsD | pull down |
| yeeZ | rpsD | pull down |
| yfiF | rpsD | pull down |
| yfiF | rpsD | pull down |
| yfiF | rpsD | pull down |
| yfjF | rpsD | pull down |
| ygaV | rpsD | pull down |
| ygcP | rpsD | pull down |
| yggL | rpsD | pull down |
| ygiC | rpsD | pull down |
| yhaK | rpsD | pull down |
| yhbQ | rpsD | pull down |
| yhfS | rpsD | pull down |
| yhfX | rpsD | pull down |
| yhiR | rpsD | pull down |
| yihD | rpsD | pull down |
| yjaA | rpsD | pull down |
| yjeE | rpsD | pull down |
| ymjA | rpsD | pull down |
| yneG | rpsD | pull down |

|      |      |           |
|------|------|-----------|
| aidB | rpsE | pull down |
| allR | rpsE | pull down |
| map  | rpsE | pull down |
| btuE | rpsE | pull down |
| btuR | rpsE | pull down |
| cbpA | rpsE | pull down |
| cbrC | rpsE | pull down |
| coaD | rpsE | pull down |
| crp  | rpsE | pull down |
| cspA | rpsE | pull down |
| cspC | rpsE | pull down |
| cspC | rpsE | pull down |
| cspD | rpsE | pull down |
| cspD | rpsE | pull down |
| cspE | rpsE | pull down |
| cspG | rpsE | pull down |
| cspG | rpsE | pull down |
| cysC | rpsE | pull down |
| damX | rpsE | pull down |
| dcm  | rpsE | pull down |
| dcyD | rpsE | pull down |
| deaD | rpsE | pull down |
| deaD | rpsE | pull down |
| dnaA | rpsE | pull down |
| dnaB | rpsE | pull down |
| dnaJ | rpsE | pull down |
| dps  | rpsE | pull down |
| dusC | rpsE | pull down |
| tsf  | rpsE | pull down |
| eno  | rpsE | pull down |
| era  | rpsE | pull down |
| era  | rpsE | pull down |
| fabA | rpsE | pull down |
| fabZ | rpsE | pull down |
| fadI | rpsE | pull down |
| fdhF | rpsE | pull down |
| fimB | rpsE | pull down |
| fis  | rpsE | pull down |
| fldA | rpsE | pull down |
| fliH | rpsE | pull down |
| ftsE | rpsE | pull down |
| ftsZ | rpsE | pull down |
| glmM | rpsE | pull down |
| glmU | rpsE | pull down |

|      |      |           |
|------|------|-----------|
| glpD | rpsE | pull down |
| greA | rpsE | pull down |
| greB | rpsE | pull down |
| grpE | rpsE | pull down |
| hfq  | rpsE | pull down |
| hoIC | rpsE | pull down |
| hrpA | rpsE | pull down |
| hscA | rpsE | pull down |
| hscC | rpsE | pull down |
| hslO | rpsE | pull down |
| hslR | rpsE | pull down |
| hslU | rpsE | pull down |
| hyaF | rpsE | pull down |
| iclR | rpsE | pull down |
| ihfB | rpsE | pull down |
| intA | rpsE | pull down |
| ppa  | rpsE | pull down |
| kdsA | rpsE | pull down |
| waaA | rpsE | pull down |
| kil  | rpsE | pull down |
| lepA | rpsE | pull down |
| lexA | rpsE | pull down |
| lpxD | rpsE | pull down |
| lpxD | rpsE | pull down |
| mukB | rpsE | pull down |
| murQ | rpsE | pull down |
| nfi  | rpsE | pull down |
| nrdG | rpsE | pull down |
| nuoE | rpsE | pull down |
| nusA | rpsE | pull down |
| nusA | rpsE | pull down |
| nusB | rpsE | pull down |
| nusG | rpsE | pull down |
| nusG | rpsE | pull down |
| obgE | rpsE | pull down |
| pbpC | rpsE | pull down |
| ybeZ | rpsE | pull down |
| ybeZ | rpsE | pull down |
| plsB | rpsE | pull down |
| pnp  | rpsE | pull down |
| pnp  | rpsE | pull down |
| pssA | rpsE | pull down |
| pyrH | rpsE | pull down |
| rapA | rpsE | pull down |
| recO | rpsE | pull down |

|      |      |           |
|------|------|-----------|
| rhIB | rpsE | pull down |
| rimN | rpsE | pull down |
| rimO | rpsE | pull down |
| rimP | rpsE | pull down |
| rlmB | rpsE | pull down |
| rlmE | rpsE | pull down |
| rlmN | rpsE | pull down |
| rlmN | rpsE | pull down |
| rluB | rpsE | pull down |
| rluB | rpsE | pull down |
| rluC | rpsE | pull down |
| rluC | rpsE | pull down |
| rnb  | rpsE | pull down |
| rne  | rpsE | pull down |
| rng  | rpsE | pull down |
| rnhA | rpsE | pull down |
| rnpA | rpsE | pull down |
| rnpA | rpsE | pull down |
| rnr  | rpsE | pull down |
| rnr  | rpsE | pull down |
| rpoA | rpsE | pull down |
| rpoA | rpsE | pull down |
| rpoA | rpsE | pull down |
| rpoB | rpsE | pull down |
| rpoC | rpsE | pull down |
| rpoC | rpsE | pull down |
| rpoD | rpsE | pull down |
| rppH | rpsE | pull down |
| rppH | rpsE | pull down |
| selB | rpsE | pull down |
| slyD | rpsE | pull down |
| spoT | rpsE | pull down |
| srlR | rpsE | pull down |
| smpB | rpsE | pull down |
| glyQ | rpsE | pull down |
| thrS | rpsE | pull down |
| trpS | rpsE | pull down |
| tgt  | rpsE | pull down |
| tig  | rpsE | pull down |
| tig  | rpsE | pull down |
| tig  | rpsE | pull down |
| trmB | rpsE | pull down |
| ulaR | rpsE | pull down |
| ulaR | rpsE | pull down |
| umuD | rpsE | pull down |

|      |      |           |
|------|------|-----------|
| uvrC | rpsE | pull down |
| uvrD | rpsE | pull down |
| wcaK | rpsE | pull down |
| yacL | rpsE | pull down |
| ybcJ | rpsE | pull down |
| ybeY | rpsE | pull down |
| ybhK | rpsE | pull down |
| ybjX | rpsE | pull down |
| ycbG | rpsE | pull down |
| ycgY | rpsE | pull down |
| ydcP | rpsE | pull down |
| ydiH | rpsE | pull down |
| ydiZ | rpsE | pull down |
| yecA | rpsE | pull down |
| yecC | rpsE | pull down |
| yeeN | rpsE | pull down |
| yfcD | rpsE | pull down |
| yfdK | rpsE | pull down |
| yfeZ | rpsE | pull down |
| yfhM | rpsE | pull down |
| yfiF | rpsE | pull down |
| yfiF | rpsE | pull down |
| yfiQ | rpsE | pull down |
| ygdL | rpsE | pull down |
| ygiC | rpsE | pull down |
| yhaJ | rpsE | pull down |
| yhbQ | rpsE | pull down |
| yhcO | rpsE | pull down |
| yibL | rpsE | pull down |
| yiiS | rpsE | pull down |
| yjaB | rpsE | pull down |
| yjbM | rpsE | pull down |
| yjeE | rpsE | pull down |
| ypfI | rpsE | pull down |
| znuC | rpsE | pull down |

|      |      |           |
|------|------|-----------|
| acpP | rpsF | pull down |
| aidB | rpsF | pull down |
| allR | rpsF | pull down |
| clpA | rpsF | pull down |
| clpP | rpsF | pull down |
| cspC | rpsF | pull down |
| deaD | rpsF | pull down |
| dnaJ | rpsF | pull down |
| dps  | rpsF | pull down |



|       |      |           |
|-------|------|-----------|
| era   | rpsF | pull down |
| fimB  | rpsF | pull down |
| gmhB  | rpsF | pull down |
| hfq   | rpsF | pull down |
| holE  | rpsF | pull down |
| htpG  | rpsF | pull down |
| ibpA  | rpsF | pull down |
| iclR  | rpsF | pull down |
| ihfB  | rpsF | pull down |
| lepA  | rpsF | pull down |
| mnmeE | rpsF | pull down |
| mreB  | rpsF | pull down |
| nfi   | rpsF | pull down |
| nusG  | rpsF | pull down |
| pgk   | rpsF | pull down |
| rcaA  | rpsF | pull down |
| rhlB  | rpsF | pull down |
| rlmN  | rpsF | pull down |
| rluB  | rpsF | pull down |
| rluC  | rpsF | pull down |
| rne   | rpsF | pull down |
| rnpA  | rpsF | pull down |
| rnr   | rpsF | pull down |
| rnr   | rpsF | pull down |
| rpoA  | rpsF | pull down |
| rpoB  | rpsF | pull down |
| rpoD  | rpsF | pull down |
| rppH  | rpsF | pull down |
| selB  | rpsF | pull down |
| spoT  | rpsF | pull down |
| thrS  | rpsF | pull down |
| trmB  | rpsF | pull down |
| uvrC  | rpsF | pull down |
| uvrD  | rpsF | pull down |
| yacl  | rpsF | pull down |
| ybcJ  | rpsF | pull down |
| ybhK  | rpsF | pull down |
| ybjX  | rpsF | pull down |
| yfiF  | rpsF | pull down |
| yfiF  | rpsF | pull down |
| acpP  | rpsG | pull down |
| acpP  | rpsG | pull down |
| acpS  | rpsG | pull down |
| ada   | rpsG | pull down |

|      |      |           |
|------|------|-----------|
| aidB | rpsG | pull down |
| allR | rpsG | pull down |
| cbpA | rpsG | pull down |
| cbpA | rpsG | pull down |
| cbrC | rpsG | pull down |
| clpA | rpsG | pull down |
| clpA | rpsG | pull down |
| clpB | rpsG | pull down |
| clpP | rpsG | pull down |
| clpP | rpsG | pull down |
| cspA | rpsG | pull down |
| cspA | rpsG | pull down |
| cspB | rpsG | pull down |
| cspC | rpsG | pull down |
| cspC | rpsG | pull down |
| cspC | rpsG | pull down |
| cspD | rpsG | pull down |
| cspD | rpsG | pull down |
| cspE | rpsG | pull down |
| cspE | rpsG | pull down |
| cspE | rpsG | pull down |
| cspG | rpsG | pull down |
| cspI | rpsG | pull down |
| hupB | rpsG | pull down |
| hupB | rpsG | pull down |
| dcm  | rpsG | pull down |
| deaD | rpsG | pull down |
| deaD | rpsG | pull down |
| dam  | rpsG | pull down |
| dnaA | rpsG | pull down |
| dnaA | rpsG | pull down |
| dusC | rpsG | pull down |
| fabA | rpsG | pull down |
| fabZ | rpsG | pull down |
| fdhE | rpsG | pull down |
| fimB | rpsG | pull down |
| fimB | rpsG | pull down |
| fmt  | rpsG | pull down |
| ftsE | rpsG | pull down |
| ftsH | rpsG | pull down |
| glmU | rpsG | pull down |
| greA | rpsG | pull down |
| grpE | rpsG | pull down |
| helD | rpsG | pull down |
| hfq  | rpsG | pull down |

|      |      |           |
|------|------|-----------|
| hldD | rpsG | pull down |
| hldD | rpsG | pull down |
| hrpA | rpsG | pull down |
| hscB | rpsG | pull down |
| hslO | rpsG | pull down |
| hslR | rpsG | pull down |
| hslU | rpsG | pull down |
| hslV | rpsG | pull down |
| htpG | rpsG | pull down |
| hypC | rpsG | pull down |
| ibpA | rpsG | pull down |
| iclR | rpsG | pull down |
| ihfB | rpsG | pull down |
| intA | rpsG | pull down |
| ppa  | rpsG | pull down |
| kdsA | rpsG | pull down |
| lepA | rpsG | pull down |
| lon  | rpsG | pull down |
| lpxD | rpsG | pull down |
| lpxD | rpsG | pull down |
| lpxD | rpsG | pull down |
| maa  | rpsG | pull down |
| mnmE | rpsG | pull down |
| moaA | rpsG | pull down |
| msyB | rpsG | pull down |
| mukB | rpsG | pull down |
| nfi  | rpsG | pull down |
| nikE | rpsG | pull down |
| nusA | rpsG | pull down |
| nusA | rpsG | pull down |
| nusG | rpsG | pull down |
| paaX | rpsG | pull down |
| ybeZ | rpsG | pull down |
| ybeZ | rpsG | pull down |
| pnp  | rpsG | pull down |
| pnp  | rpsG | pull down |
| ppiC | rpsG | pull down |
| priB | rpsG | pull down |
| priC | rpsG | pull down |
| dnaG | rpsG | pull down |
| prmA | rpsG | pull down |
| pssA | rpsG | pull down |
| pyrH | rpsG | pull down |
| rcaA | rpsG | pull down |
| recG | rpsG | pull down |

|      |      |           |
|------|------|-----------|
| recO | rpsG | pull down |
| rfaF | rpsG | pull down |
| rhIB | rpsG | pull down |
| rhIB | rpsG | pull down |
| rhIE | rpsG | pull down |
| ribD | rpsG | pull down |
| rimP | rpsG | pull down |
| rlmB | rpsG | pull down |
| rlmE | rpsG | pull down |
| rlmL | rpsG | pull down |
| rlmM | rpsG | pull down |
| rlmN | rpsG | pull down |
| rlmN | rpsG | pull down |
| rluB | rpsG | pull down |
| rluB | rpsG | pull down |
| rluC | rpsG | pull down |
| rluC | rpsG | pull down |
| rluC | rpsG | pull down |
| rluF | rpsG | pull down |
| rne  | rpsG | pull down |
| rne  | rpsG | pull down |
| rnpA | rpsG | pull down |
| rnpA | rpsG | pull down |
| rnr  | rpsG | pull down |
| rnr  | rpsG | pull down |
| rpoA | rpsG | pull down |
| rpoC | rpsG | pull down |
| rpoC | rpsG | pull down |
| rpoD | rpsG | pull down |
| rpoD | rpsG | pull down |
| rpoZ | rpsG | pull down |
| rppH | rpsG | pull down |
| rppH | rpsG | pull down |
| rsgA | rpsG | pull down |
| rsmB | rpsG | pull down |
| rsmC | rpsG | pull down |
| rutR | rpsG | pull down |
| selB | rpsG | pull down |
| speA | rpsG | pull down |
| spoT | rpsG | pull down |
| spoT | rpsG | pull down |
| sspB | rpsG | pull down |
| thrS | rpsG | pull down |
| tgt  | rpsG | pull down |
| tig  | rpsG | pull down |

|      |      |           |
|------|------|-----------|
| tig  | rpsG | pull down |
| tiIS | rpsG | pull down |
| trmB | rpsG | pull down |
| trmB | rpsG | pull down |
| trmH | rpsG | pull down |
| ulaR | rpsG | pull down |
| uvrC | rpsG | pull down |
| uvrC | rpsG | pull down |
| uvrD | rpsG | pull down |
| wcaK | rpsG | pull down |
| yaeJ | rpsG | pull down |
| ybhK | rpsG | pull down |
| ybjX | rpsG | pull down |
| ybjX | rpsG | pull down |
| yciH | rpsG | pull down |
| ydcP | rpsG | pull down |
| ydiE | rpsG | pull down |
| ydiH | rpsG | pull down |
| yecA | rpsG | pull down |
| yfiF | rpsG | pull down |
| yfiF | rpsG | pull down |
| yfjF | rpsG | pull down |
| ygdL | rpsG | pull down |
| ygiC | rpsG | pull down |
| yhbY | rpsG | pull down |
| yhcO | rpsG | pull down |
| yibL | rpsG | pull down |
| yihI | rpsG | pull down |
| yjaG | rpsG | pull down |
| ymjA | rpsG | pull down |
| yneG | rpsG | pull down |

|      |      |           |
|------|------|-----------|
| acpP | rpsH | pull down |
| clpB | rpsH | pull down |
| deaD | rpsH | pull down |
| dps  | rpsH | pull down |
| fimB | rpsH | pull down |
| iclR | rpsH | pull down |
| ihfB | rpsH | pull down |
| ppa  | rpsH | pull down |
| lon  | rpsH | pull down |
| lpxD | rpsH | pull down |
| plsB | rpsH | pull down |
| rnpA | rpsH | pull down |
| rnpA | rpsH | pull down |

|      |      |           |
|------|------|-----------|
| rnr  | rpsH | pull down |
| spoT | rpsH | pull down |
| ulaR | rpsH | pull down |
| uvrC | rpsH | pull down |
| yfiF | rpsH | pull down |

|      |      |           |
|------|------|-----------|
| alkB | rpsI | pull down |
| appY | rpsI | pull down |
| yahl | rpsI | pull down |
| atoC | rpsI | pull down |
| cbrC | rpsI | pull down |
| cca  | rpsI | pull down |
| cho  | rpsI | pull down |
| clpS | rpsI | pull down |
| cspA | rpsI | pull down |
| cspC | rpsI | pull down |
| cspE | rpsI | pull down |
| cspG | rpsI | pull down |
| cspl | rpsI | pull down |
| damX | rpsI | pull down |
| hupB | rpsI | pull down |
| deaD | rpsI | pull down |
| ndh  | rpsI | pull down |
| dinG | rpsI | pull down |
| dnaA | rpsI | pull down |
| dnaA | rpsI | pull down |
| era  | rpsI | pull down |
| eutP | rpsI | pull down |
| fabA | rpsI | pull down |
| fadh | rpsI | pull down |
| fadI | rpsI | pull down |
| fdhE | rpsI | pull down |
| fkpB | rpsI | pull down |
| fmt  | rpsI | pull down |
| ftsE | rpsI | pull down |
| ftsN | rpsI | pull down |
| gatD | rpsI | pull down |
| glcC | rpsI | pull down |
| glmU | rpsI | pull down |
| greB | rpsI | pull down |
| grpE | rpsI | pull down |
| hscA | rpsI | pull down |
| hscC | rpsI | pull down |
| htrB | rpsI | pull down |
| iciA | rpsI | pull down |

|      |      |           |
|------|------|-----------|
| intD | rpsI | pull down |
| iscS | rpsI | pull down |
| kdsA | rpsI | pull down |
| gmk  | rpsI | pull down |
| lpxA | rpsI | pull down |
| lpxD | rpsI | pull down |
| meIR | rpsI | pull down |
| mtfA | rpsI | pull down |
| mug  | rpsI | pull down |
| mukB | rpsI | pull down |
| mukE | rpsI | pull down |
| murG | rpsI | pull down |
| mutY | rpsI | pull down |
| npdA | rpsI | pull down |
| nuoE | rpsI | pull down |
| nusA | rpsI | pull down |
| obgE | rpsI | pull down |
| mdoG | rpsI | pull down |
| phrB | rpsI | pull down |
| plsB | rpsI | pull down |
| pmrD | rpsI | pull down |
| frvA | rpsI | pull down |
| puuB | rpsI | pull down |
| qseC | rpsI | pull down |
| racR | rpsI | pull down |
| recG | rpsI | pull down |
| rfaC | rpsI | pull down |
| rfaZ | rpsI | pull down |
| rhIE | rpsI | pull down |
| rhmD | rpsI | pull down |
| rlmL | rpsI | pull down |
| rluF | rpsI | pull down |
| rng  | rpsI | pull down |
| rng  | rpsI | pull down |
| rnhA | rpsI | pull down |
| rnpA | rpsI | pull down |
| rnr  | rpsI | pull down |
| rppH | rpsI | pull down |
| rsmB | rpsI | pull down |
| rsmC | rpsI | pull down |
| rsuA | rpsI | pull down |
| rutR | rpsI | pull down |
| selB | rpsI | pull down |
| selD | rpsI | pull down |
| slyD | rpsI | pull down |

|      |      |           |
|------|------|-----------|
| soxR | rpsI | pull down |
| soxS | rpsI | pull down |
| spoT | rpsI | pull down |
| spr  | rpsI | pull down |
| srmB | rpsI | pull down |
| tig  | rpsI | pull down |
| tig  | rpsI | pull down |
| tiIS | rpsI | pull down |
| treR | rpsI | pull down |
| trmH | rpsI | pull down |
| trpE | rpsI | pull down |
| ulaR | rpsI | pull down |
| uspF | rpsI | pull down |
| wcaK | rpsI | pull down |
| wecG | rpsI | pull down |
| wzb  | rpsI | pull down |
| xerD | rpsI | pull down |
| yahA | rpsI | pull down |
| ybcJ | rpsI | pull down |
| yceD | rpsI | pull down |
| ycfD | rpsI | pull down |
| ycgZ | rpsI | pull down |
| ychJ | rpsI | pull down |
| yciG | rpsI | pull down |
| ydhZ | rpsI | pull down |
| ydiE | rpsI | pull down |
| yeaM | rpsI | pull down |
| yebC | rpsI | pull down |
| yecA | rpsI | pull down |
| yecF | rpsI | pull down |
| yedF | rpsI | pull down |
| yeeN | rpsI | pull down |
| yegL | rpsI | pull down |
| yfjF | rpsI | pull down |
| ygaP | rpsI | pull down |
| ygck | rpsI | pull down |
| ygcO | rpsI | pull down |
| yggS | rpsI | pull down |
| ygiC | rpsI | pull down |
| yhbS | rpsI | pull down |
| yhcO | rpsI | pull down |
| yihI | rpsI | pull down |
| yjaG | rpsI | pull down |
| yjhl | rpsI | pull down |
| ykfJ | rpsI | pull down |



|      |      |           |
|------|------|-----------|
| ymgA | rpsI | pull down |
| cusR | rsmA | pull down |
| cspC | rsmB | pull down |
| eutE | rsmB | pull down |
| bcp  | rsmC | pull down |
| queA | rsmC | pull down |
| ftsE | rsmD | pull down |
| yqgE | rsmE | pull down |
| yhiR | rsmH | pull down |
| tauB | rstA | pull down |
| topA | rstA | pull down |
| pgl  | rsuA | pull down |
| adhE | rsuA | pull down |
| pepN | rsuA | pull down |
| aroL | rsuA | pull down |
| basR | rsuA | pull down |
| bioC | rsuA | pull down |
| cirA | rsuA | pull down |
| dmlR | rsuA | pull down |
| fliG | rsuA | pull down |
| fliH | rsuA | pull down |
| fliK | rsuA | pull down |
| fliZ | rsuA | pull down |
| galE | rsuA | pull down |
| galS | rsuA | pull down |
| mhpE | rsuA | pull down |
| mhpA | rsuA | pull down |
| mhpR | rsuA | pull down |
| nagC | rsuA | pull down |
| rlmL | rsuA | pull down |
| sucC | rsuA | pull down |
| sucD | rsuA | pull down |
| yacl | rsuA | pull down |

|      |      |                              |
|------|------|------------------------------|
| ycgF | rsuA | pull down                    |
| ychO | rsuA | pull down                    |
| ydaE | rsuA | pull down                    |
| ydjA | rsuA | pull down                    |
| yeaK | rsuA | pull down                    |
| yedK | rsuA | pull down                    |
| yfeS | rsuA | pull down                    |
| ylbA | rsuA | pull down                    |
| ymgA | rumA | pull down                    |
| ppiB | rumB | pull down                    |
| nfi  | ruvA | pull down                    |
| recJ | ruvA | pull down                    |
| nohB | sapD | pull down                    |
| slyD | sapD | pull down                    |
| ycaQ | sapD | pull down                    |
| trxA | sdaB | tandem affinity purification |
| acpP | secA | blue native page             |
| acpP | secA | tandem affinity purification |
| acpP | secA | pull down                    |
| amn  | secA | pull down                    |
| aspA | secA | pull down                    |
| ansA | secA | pull down                    |
| lacZ | secA | pull down                    |
| clpA | secA | pull down                    |
| clpP | secA | pull down                    |
| cspE | secA | pull down                    |
| dusC | secA | pull down                    |
| tufA | secA | pull down                    |
| tufA | secA | pull down                    |
| nfo  | secA | pull down                    |
| fliJ | secA | pull down                    |
| ftsZ | secA | pull down                    |
| gcvP | secA | pull down                    |
| greA | secA | pull down                    |
| hfq  | secA | pull down                    |
| hldD | secA | pull down                    |
| hns  | secA | pull down                    |

|      |      |                                  |
|------|------|----------------------------------|
| holB | secA | pull down                        |
| holC | secA | pull down                        |
| holD | secA | pull down                        |
| hscA | secA | pull down                        |
| hslU | secA | pull down                        |
| lamB | secA | isothermal titration calorimetry |
| lamB | secA | nuclear magnetic resonance       |
| lamB | secA | molecular sieving                |
| cadA | secA | pull down                        |
| metK | secA | pull down                        |
| mnmE | secA | pull down                        |
| mreB | secA | pull down                        |
| mreB | secA | pull down                        |
| narZ | secA | pull down                        |
| nikE | secA | pull down                        |
| nusG | secA | pull down                        |
| parC | secA | pull down                        |
| parE | secA | pull down                        |
| ybeZ | secA | pull down                        |
| phoA | secA | isothermal titration calorimetry |
| pyrH | secA | pull down                        |
| rplW | secA | pull down                        |
| rplD | secA | pull down                        |
| rlmN | secA | pull down                        |
| rlmN | secA | pull down                        |
| rluC | secA | pull down                        |
| rodZ | secA | pull down                        |
| rpoB | secA | pull down                        |
| secA | secA | blue native page                 |
| secB | secA | pull down                        |
| secY | secA | far western blotting             |
| smg  | secA | pull down                        |
| ssb  | secA | pull down                        |
| smpB | secA | pull down                        |
| sbp  | secA | pull down                        |
| tyrS | secA | pull down                        |
| uspG | secA | pull down                        |
| uvrD | secA | pull down                        |
| ybgC | secA | tandem affinity purification     |
| ybgC | secA | tandem affinity purification     |
| ybhK | secA | pull down                        |
| yecA | secA | pull down                        |
| yejA | secA | pull down                        |
| yihI | secA | pull down                        |

|      |      |           |
|------|------|-----------|
| ppa  | secB | pull down |
| lon  | secB | pull down |
| secA | secB | pull down |
| secA | secB | pull down |
| stfQ | secB | pull down |
| uspF | secB | pull down |
| uspG | secB | pull down |
| ydbA | secB | pull down |
| ydeU | secB | pull down |

|      |      |           |
|------|------|-----------|
| speF | selB | pull down |
| hfq  | selB | pull down |
| rlmN | selB | pull down |
| rlmN | selB | pull down |
| serC | selB | pull down |
| smpB | selB | pull down |
| ydcK | selB | pull down |
| ydcP | selB | pull down |
| ydiZ | selB | pull down |

|      |      |           |
|------|------|-----------|
| grxD | selD | pull down |
| rpe  | selD | pull down |
| trpS | selD | pull down |

|      |      |           |
|------|------|-----------|
| hupB | seqA | pull down |
|------|------|-----------|

|      |      |           |
|------|------|-----------|
| araG | serB | pull down |
| nlpB | serB | pull down |

|      |      |           |
|------|------|-----------|
| allB | serC | pull down |
| asnA | serC | pull down |
| dpiA | serC | pull down |
| ycdX | serC | pull down |

|      |      |                                    |
|------|------|------------------------------------|
| rne  | sfmD | affinity chromatography technology |
| rne  | sfmD | affinity chromatography technology |
| rne  | sfmD | affinity chromatography technology |
| rne  | sfmD | affinity chromatography technology |
| rne  | sfmD | affinity chromatography technology |
| yajD | sfmD | pull down                          |

|      |     |           |
|------|-----|-----------|
| cspD | skp | pull down |
| hupB | skp | pull down |

|      |     |           |
|------|-----|-----------|
| dps  | skp | pull down |
| gnsA | skp | pull down |
| hfq  | skp | pull down |
| hfq  | skp | pull down |
| lexA | skp | pull down |
| mtlR | skp | pull down |
| murQ | skp | pull down |
| rlmN | skp | pull down |
| smpB | skp | pull down |
| tusA | skp | pull down |
| -    | skp | pull down |
| yebR | skp | pull down |
| yegV | skp | pull down |
| yihI | skp | pull down |

|      |     |                                                   |
|------|-----|---------------------------------------------------|
| gadA | slp | comigration in non denaturing gel electrophoresis |
| dcrB | slp | blue native page                                  |
| frdA | slp | comigration in non denaturing gel electrophoresis |
| slp  | slp | blue native page                                  |

|      |      |           |
|------|------|-----------|
| clpX | slyB | pull down |
| rimO | slyB | pull down |
| yebC | slyB | pull down |

|      |      |           |
|------|------|-----------|
| alkA | slyD | pull down |
| alsB | slyD | pull down |
| caiA | slyD | pull down |
| groS | slyD | pull down |
| clpP | slyD | pull down |
| corC | slyD | pull down |
| cysC | slyD | pull down |
| hupB | slyD | pull down |
| polA | slyD | pull down |
| dnaQ | slyD | pull down |
| dnaQ | slyD | pull down |
| dps  | slyD | pull down |
| dsbC | slyD | pull down |
| edd  | slyD | pull down |
| nth  | slyD | pull down |
| nei  | slyD | pull down |
| era  | slyD | pull down |

|      |      |           |
|------|------|-----------|
| eutQ | slyD | pull down |
| fdhE | slyD | pull down |
| fkpB | slyD | pull down |
| fliH | slyD | pull down |
| ftsA | slyD | pull down |
| ftsE | slyD | pull down |
| fucR | slyD | pull down |
| glpD | slyD | pull down |
| grxD | slyD | pull down |
| hcaB | slyD | pull down |
| hypB | slyD | pull down |
| ilvN | slyD | pull down |
| ppa  | slyD | pull down |
| iscR | slyD | pull down |
| minC | slyD | pull down |
| mipA | slyD | pull down |
| mug  | slyD | pull down |
| murD | slyD | pull down |
| murQ | slyD | pull down |
| mutH | slyD | pull down |
| nemA | slyD | pull down |
| nrfG | slyD | pull down |
| obgE | slyD | pull down |
| oxaA | slyD | pull down |
| panB | slyD | pull down |
| panC | slyD | pull down |
| parC | slyD | pull down |
| phnP | slyD | pull down |
| pyrH | slyD | pull down |
| racC | slyD | pull down |
| relA | slyD | pull down |
| rfaH | slyD | pull down |
| rplQ | slyD | pull down |
| rplD | slyD | pull down |
| rpiR | slyD | pull down |
| rppH | slyD | pull down |
| rpsA | slyD | pull down |
| rsmE | slyD | pull down |
| rutR | slyD | pull down |
| sfsA | slyD | pull down |
| sodB | slyD | pull down |
| ssb  | slyD | pull down |
| sspB | slyD | pull down |
| sspB | slyD | pull down |
| stpA | slyD | pull down |

|      |      |                                                   |
|------|------|---------------------------------------------------|
| suhB | slyD | pull down                                         |
| aspS | slyD | pull down                                         |
| gltX | slyD | pull down                                         |
| thiK | slyD | pull down                                         |
| thiL | slyD | pull down                                         |
| trxA | slyD | tandem affinity purification                      |
| trxA | slyD | tandem affinity purification                      |
| trxC | slyD | pull down                                         |
| tig  | slyD | pull down                                         |
| wcaK | slyD | pull down                                         |
| xdhB | slyD | pull down                                         |
| yacL | slyD | pull down                                         |
| yagL | slyD | pull down                                         |
| yagP | slyD | pull down                                         |
| yajO | slyD | pull down                                         |
| yceI | slyD | pull down                                         |
| ycgE | slyD | pull down                                         |
| ycgL | slyD | pull down                                         |
| ycgM | slyD | pull down                                         |
| ychG | slyD | pull down                                         |
| ychJ | slyD | pull down                                         |
| yciH | slyD | pull down                                         |
| yebC | slyD | pull down                                         |
| yedK | slyD | pull down                                         |
| yegV | slyD | pull down                                         |
| yfjF | slyD | pull down                                         |
| ygbJ | slyD | pull down                                         |
| yhaJ | slyD | pull down                                         |
| yhaK | slyD | pull down                                         |
| yhbQ | slyD | pull down                                         |
| ymjA | slyD | pull down                                         |
| yncG | slyD | pull down                                         |
| yqhD | slyD | pull down                                         |
|      |      |                                                   |
| cysK | sodB | comigration in non denaturing gel electrophoresis |
|      |      |                                                   |
| trxA | sodA | tandem affinity purification                      |
|      |      |                                                   |
| engD | sohB | pull down                                         |
| yeaK | sohB | pull down                                         |
| ynaA | sohB | pull down                                         |
|      |      |                                                   |
| aat  | speA | pull down                                         |
|      |      |                                                   |
| acnB | speD | pull down                                         |

|      |      |                              |
|------|------|------------------------------|
| rlmE | speD | pull down                    |
| acpP | spoT | tandem affinity purification |
| acpP | spoT | pull down                    |
| clpA | spoT | pull down                    |
| fldA | spoT | pull down                    |
| hfq  | spoT | pull down                    |
| queC | spoT | pull down                    |
| recF | spoT | pull down                    |
| rlmN | spoT | pull down                    |
| rluC | spoT | pull down                    |
| rnk  | spoT | pull down                    |
| rnpA | spoT | pull down                    |
| rpoZ | spoT | pull down                    |
| rppH | spoT | pull down                    |
| skp  | spoT | pull down                    |
| ybgC | spoT | tandem affinity purification |
| ydiH | spoT | pull down                    |
| yihI | spoT | pull down                    |
| grpE | sra  | pull down                    |
| cbpA | srnB | pull down                    |
| deaD | srnB | pull down                    |
| dnaJ | srnB | pull down                    |
| nikE | srnB | pull down                    |
| plsB | srnB | pull down                    |
| pnp  | srnB | pull down                    |
| rplD | srnB | pull down                    |
| rlmN | srnB | pull down                    |
| rlmN | srnB | pull down                    |
| rluB | srnB | pull down                    |
| rluB | srnB | pull down                    |
| rluC | srnB | pull down                    |
| rne  | srnB | pull down                    |
| rppH | srnB | pull down                    |
| selB | srnB | pull down                    |
| selB | srnB | pull down                    |
| spoT | srnB | pull down                    |
| sufI | srnB | pull down                    |
| topA | srnB | pull down                    |
| trmB | srnB | pull down                    |
| ybcJ | srnB | pull down                    |
| ybjX | srnB | pull down                    |
| yodC | srnB | pull down                    |



|      |      |                              |
|------|------|------------------------------|
| fabA | ffh  | pull down                    |
| fabZ | ffh  | pull down                    |
| gyrA | ffh  | pull down                    |
| rlmE | ffh  | pull down                    |
| trxA | ffh  | tandem affinity purification |
| trxA | ffh  | tandem affinity purification |
| phrB | ssb  | pull down                    |
| recG | ssb  | pull down                    |
| ung  | ssb  | pull down                    |
| ybcN | ssb  | pull down                    |
| moaA | smpB | pull down                    |
| prfC | smpB | pull down                    |
| tgt  | smpB | pull down                    |
| dut  | stfR | pull down                    |
| flgG | stfR | pull down                    |
| mcbR | stfR | pull down                    |
| ycgC | stfR | pull down                    |
| uxaA | stfR | pull down                    |
| ycgV | stfR | pull down                    |
| yfcB | stfR | pull down                    |
| dtd  | stpA | pull down                    |
| dut  | stpA | pull down                    |
| hns  | stpA | pull down                    |
| hns  | stpA | pull down                    |
| mfd  | stpA | pull down                    |
| msyB | stpA | pull down                    |
| nagB | stpA | pull down                    |
| potD | stpA | pull down                    |
| rimO | stpA | pull down                    |
| sbm  | stpA | pull down                    |
| tkkB | stpA | pull down                    |
| uspA | stpA | pull down                    |
| ybgl | stpA | pull down                    |
| yciA | stpA | pull down                    |
| yebC | stpA | pull down                    |
| yjjU | stpA | pull down                    |
| trxA | sucC | tandem affinity purification |

|      |      |                                                   |
|------|------|---------------------------------------------------|
| trxA | sucC | tandem affinity purification                      |
| deaD | sucD | pull down                                         |
| nifU | sucD | pull down                                         |
| sucC | sucD | blue native page                                  |
| sucC | sucD | pull down                                         |
| sucC | sucD | comigration in non denaturing gel electrophoresis |
| trxA | sucD | tandem affinity purification                      |
| trxA | sucD | tandem affinity purification                      |
| alkB | sufC | pull down                                         |
| deaD | sufC | pull down                                         |
| infC | sufC | pull down                                         |
| sufB | sufC | pull down                                         |
| ybcN | sufC | pull down                                         |
| yfiF | sufC | pull down                                         |
| acrD | alaS | pull down                                         |
| clpB | alaS | pull down                                         |
| dnaK | alaS | pull down                                         |
| glmS | alaS | pull down                                         |
| glnD | alaS | pull down                                         |
| mprA | alaS | pull down                                         |
| msbB | alaS | pull down                                         |
| mrcA | alaS | pull down                                         |
| rluB | alaS | pull down                                         |
| topA | alaS | pull down                                         |
| yfaL | alaS | pull down                                         |
| yfaS | alaS | pull down                                         |
| yfjK | alaS | pull down                                         |
| hemN | cysS | pull down                                         |
| corA | aspS | pull down                                         |
| dgoK | aspS | pull down                                         |
| dnaA | aspS | pull down                                         |
| dnaK | aspS | comigration in non denaturing gel electrophoresis |
| fliC | aspS | pull down                                         |
| folC | aspS | pull down                                         |
| fumC | aspS | pull down                                         |
| gcl  | aspS | pull down                                         |

|      |      |                                                   |
|------|------|---------------------------------------------------|
| pfkA | aspS | pull down                                         |
| napD | aspS | pull down                                         |
| perR | aspS | pull down                                         |
| dnaG | aspS | pull down                                         |
| rplJ | aspS | pull down                                         |
| rpoA | aspS | pull down                                         |
| rpoA | aspS | pull down                                         |
| sgbE | aspS | pull down                                         |
| yahG | aspS | pull down                                         |
| ycho | aspS | pull down                                         |
| ydjF | aspS | pull down                                         |
| accB | gltX | pull down                                         |
| cysK | gltX | comigration in non denaturing gel electrophoresis |
| deoC | gltX | pull down                                         |
| eno  | gltX | pull down                                         |
| flgM | gltX | pull down                                         |
| fucR | gltX | pull down                                         |
| manA | gltX | pull down                                         |
| ybhB | gltX | pull down                                         |
| yecJ | gltX | pull down                                         |
| yhgF | gltX | pull down                                         |
| tynA | pheT | pull down                                         |
| paaJ | pheT | pull down                                         |
| pheS | pheT | blue native page                                  |
| pheS | pheT | pull down                                         |
| pheS | pheT | comigration in non denaturing gel electrophoresis |
| argS | pheT | pull down                                         |
| uxaA | pheT | pull down                                         |
| yfjK | pheT | pull down                                         |
| grxA | glyQ | pull down                                         |
| lldD | glyQ | pull down                                         |
| metK | glyQ | pull down                                         |
| moaD | glyQ | pull down                                         |
| moaE | glyQ | pull down                                         |
| mreB | glyQ | pull down                                         |
| gyrA | glyS | pull down                                         |
| gyrB | glyS | pull down                                         |
| nrdR | glyS | pull down                                         |
| purD | glyS | pull down                                         |
| rfaP | glyS | pull down                                         |
| skp  | glyS | pull down                                         |

|      |      |                                                   |
|------|------|---------------------------------------------------|
| smp  | glyS | pull down                                         |
| fdoG | ileS | pull down                                         |
| fkpB | ileS | pull down                                         |
| panB | ileS | pull down                                         |
| rnb  | ileS | pull down                                         |
| lysU | ileS | pull down                                         |
| hypC | lysS | pull down                                         |
| idnD | lysS | pull down                                         |
| mdh  | lysS | comigration in non denaturing gel electrophoresis |
| pqqL | lysS | pull down                                         |
| rlmN | lysS | pull down                                         |
| sbm  | lysS | pull down                                         |
| tdcD | lysS | pull down                                         |
| ucpA | lysS | pull down                                         |
| uup  | lysS | pull down                                         |
| ybaZ | lysS | pull down                                         |
| yeiR | lysS | pull down                                         |
| accA | lysU | pull down                                         |
| fdhD | lysU | pull down                                         |
| grcA | lysU | pull down                                         |
| mreB | lysU | pull down                                         |
| rlmN | lysU | pull down                                         |
| sspA | lysU | pull down                                         |
| tpiA | lysU | pull down                                         |
| ligA | leuS | pull down                                         |
| mdh  | leuS | comigration in non denaturing gel electrophoresis |
| solA | leuS | pull down                                         |
| topA | leuS | two hybrid array                                  |
| priC | metG | pull down                                         |
| truD | metG | pull down                                         |
| aspS | asnS | pull down                                         |
| uxaC | asnS | pull down                                         |
| cheA | proS | two hybrid array                                  |
| cysI | proS | pull down                                         |
| dnaK | proS | pull down                                         |
| folA | proS | pull down                                         |
| fliA | proS | two hybrid array                                  |
| fliC | proS | pull down                                         |

|      |      |                  |
|------|------|------------------|
| fliG | proS | two hybrid array |
| fliI | proS | two hybrid array |
| ibpA | proS | pull down        |
| lsrK | proS | pull down        |
| narQ | proS | pull down        |
| proA | proS | pull down        |
| rpe  | proS | two hybrid array |
| treC | proS | pull down        |
| wecG | proS | pull down        |
|      |      |                  |
| cysK | glnS | pull down        |
| speF | glnS | pull down        |
| fabZ | glnS | pull down        |
| lpxD | glnS | pull down        |
| trmB | glnS | pull down        |
|      |      |                  |
| gyrA | argS | pull down        |
| speE | argS | pull down        |
| yagT | argS | pull down        |
| yebC | argS | pull down        |
|      |      |                  |
| tag  | serS | pull down        |
| cspE | serS | pull down        |
| dam  | serS | pull down        |
| fadH | serS | pull down        |
| slyD | serS | pull down        |
| sspA | serS | pull down        |
| lysU | serS | pull down        |
| ydiZ | serS | pull down        |
| yidF | serS | pull down        |
|      |      |                  |
| tynA | thrS | pull down        |
| asmA | thrS | pull down        |
| cysB | thrS | pull down        |
| dnaB | thrS | pull down        |
| folA | thrS | pull down        |
| glnK | thrS | pull down        |
| gpmA | thrS | pull down        |
| greA | thrS | pull down        |
| kefF | thrS | pull down        |
| pykA | thrS | pull down        |
| livF | thrS | pull down        |
| rpsF | thrS | pull down        |
| sspB | thrS | pull down        |
| -    | thrS | pull down        |

|      |      |                                                   |
|------|------|---------------------------------------------------|
| yaeB | thrS | pull down                                         |
| ybaA | thrS | pull down                                         |
| ybil | thrS | pull down                                         |
| ycbK | thrS | pull down                                         |
| ydck | thrS | pull down                                         |
| ydeU | thrS | pull down                                         |
| yfiQ | thrS | pull down                                         |
| yidA | thrS | pull down                                         |
| ymgA | thrS | pull down                                         |
| tufA | valS | pull down                                         |
| glcB | valS | comigration in non denaturing gel electrophoresis |
| xdhD | valS | pull down                                         |
| ybhK | valS | pull down                                         |
| pykF | tyrS | pull down                                         |
| chbG | talA | pull down                                         |
| dosP | talA | pull down                                         |
| eutE | talA | pull down                                         |
| pabC | talA | pull down                                         |
| rluD | talA | pull down                                         |
| tauD | talA | pull down                                         |
| ydfI | talA | pull down                                         |
| yggC | talA | pull down                                         |
| allC | talB | pull down                                         |
| zntA | talB | pull down                                         |
| rlmM | talB | pull down                                         |
| trxA | talB | tandem affinity purification                      |
| kbl  | tdh  | pull down                                         |
| murQ | tdh  | pull down                                         |
| yeaK | tdh  | pull down                                         |

|      |      |           |
|------|------|-----------|
| cspD | tehB | pull down |
| fdx  | tehB | pull down |
| yfdR | tehB | pull down |

|      |     |           |
|------|-----|-----------|
| gsp  | tgt | pull down |
| hfq  | tgt | pull down |
| prfC | tgt | pull down |
| rnr  | tgt | pull down |
| uvrD | tgt | pull down |

|      |      |           |
|------|------|-----------|
| tig  | lacA | pull down |
| ygaV | lacA | pull down |

|      |      |           |
|------|------|-----------|
| speG | thil | pull down |
| mutM | thil | pull down |
| maa  | thil | pull down |
| frr  | thil | pull down |
| trxC | thil | pull down |
| yaeQ | thil | pull down |
| ychJ | thil | pull down |
| yciH | thil | pull down |
| yeiR | thil | pull down |

|      |      |           |
|------|------|-----------|
| yebC | sseA | pull down |
|------|------|-----------|

|      |     |                                                   |
|------|-----|---------------------------------------------------|
| groS | tig | pull down                                         |
| groS | tig | pull down                                         |
| groL | tig | comigration in non denaturing gel electrophoresis |
| clpP | tig | pull down                                         |
| eaeH | tig | pull down                                         |
| fabA | tig | pull down                                         |

|      |     |                  |
|------|-----|------------------|
| flgH | tig | two hybrid array |
| folM | tig | pull down        |
| glnB | tig | pull down        |
| hfq  | tig | pull down        |
| hns  | tig | pull down        |
| hypC | tig | pull down        |
| ppa  | tig | pull down        |
| ppa  | tig | pull down        |
| pykA | tig | pull down        |
| pykA | tig | pull down        |
| metK | tig | two hybrid array |
| ompA | tig | pull down        |
| ybiW | tig | pull down        |
| pta  | tig | pull down        |
| purC | tig | pull down        |
| purC | tig | pull down        |
| rbsA | tig | pull down        |
| rpoZ | tig | pull down        |
| rpsG | tig | pull down        |
| uxaC | tig | pull down        |
| ydiH | tig | pull down        |
| yfcB | tig | pull down        |
| yfcB | tig | pull down        |

|      |      |                                                   |
|------|------|---------------------------------------------------|
| pflB | tnaA | comigration in non denaturing gel electrophoresis |
| hchA | tnaA | pull down                                         |
| hscC | tnaA | pull down                                         |
| menF | tnaA | pull down                                         |
| mqsR | tnaA | pull down                                         |
| rnz  | tnaA | pull down                                         |
| lysU | tnaA | pull down                                         |
| tauA | tnaA | pull down                                         |
| trxA | tnaA | tandem affinity purification                      |
| uppS | tnaA | pull down                                         |

|      |      |           |
|------|------|-----------|
| artP | topA | pull down |
|------|------|-----------|



|      |      |                              |
|------|------|------------------------------|
| cspC | topA | pull down                    |
| fliH | topA | two hybrid array             |
| gatD | topA | pull down                    |
| glnD | topA | pull down                    |
| holC | topA | pull down                    |
| holC | topA | pull down                    |
| holE | topA | pull down                    |
| hscC | topA | pull down                    |
| hyaD | topA | pull down                    |
| iadA | topA | pull down                    |
| msbB | topA | pull down                    |
| ydbK | topA | two hybrid array             |
| recQ | topA | pull down                    |
| rnfC | topA | pull down                    |
| rnhA | topA | pull down                    |
| rnhA | topA | pull down                    |
| rsmB | topA | pull down                    |
| sohA | topA | pull down                    |
| tig  | topA | pull down                    |
| trpB | topA | pull down                    |
| ybbL | topA | pull down                    |
| yber | topA | pull down                    |
| yigZ | topA | pull down                    |
| lpxB | torC | pull down                    |
| yeaA | torY | pull down                    |
| dps  | tpx  | pull down                    |
| hinT | tpx  | pull down                    |
| puuB | tpx  | pull down                    |
| thiD | tpx  | pull down                    |
| trxA | tpx  | tandem affinity purification |

|      |      |                              |
|------|------|------------------------------|
| yjeK | treR | pull down                    |
| yjgl | treR | pull down                    |
| fhiA | trmB | two hybrid array             |
| yhhY | trmB | pull down                    |
| spoT | trmH | pull down                    |
| ybeR | trmH | pull down                    |
| dpiA | trmJ | pull down                    |
| rfaZ | trmJ | pull down                    |
| lrp  | trxB | pull down                    |
| mdoG | trxB | pull down                    |
| trxA | trxB | x-ray crystallography        |
| ycdX | trxB | pull down                    |
| cbpA | tusC | pull down                    |
| ybeY | typA | pull down                    |
| yigZ | typA | pull down                    |
| nadB | tyrR | pull down                    |
| argI | tyrR | pull down                    |
| eutD | ubiB | pull down                    |
| holC | ubiB | pull down                    |
| holE | ubiB | pull down                    |
| yiiS | ubiB | pull down                    |
| yiiD | ubiF | pull down                    |
| metR | udp  | pull down                    |
| trxA | udp  | tandem affinity purification |
| glnD | ulaD | pull down                    |
| fkpA | ulaR | pull down                    |
| yfiQ | ulaR | pull down                    |

yfbM            upp            pull down

def            usg            pull down

ibpA            uspA            pull down

nusA            uspA            pull down

pyrH            uspA            pull down

yiiS            uspD            pull down

artI            uspG            pull down

artJ            uspG            pull down

groL            uspG            cosedimentation through density gradient

cheZ            uspG            pull down

cho            uspG            pull down

cspB            uspG            pull down

cspC            uspG            pull down

cspE            uspG            pull down

cspG            uspG            pull down

cspl            uspG            pull down

hupB            uspG            pull down

dksA            uspG            pull down

tufA            uspG            pull down

entB            uspG            pull down

xthA            uspG            pull down

fliH            uspG            pull down

ftsZ            uspG            pull down

grxA            uspG            pull down

hdhA            uspG            pull down

hfq            uspG            pull down

mhpE            uspG            pull down

ibpA            uspG            pull down

lpxB            uspG            pull down

mreB            uspG            pull down

murG            uspG            pull down

npdA            uspG            pull down

nudB            uspG            pull down

pncB            uspG            pull down

|      |      |           |
|------|------|-----------|
| potF | uspG | pull down |
| pyrD | uspG | pull down |
| pyrH | uspG | pull down |
| rcaF | uspG | pull down |
| rfaC | uspG | pull down |
| rfaF | uspG | pull down |
| rho  | uspG | pull down |
| rimO | uspG | pull down |
| rplB | uspG | pull down |
| rluC | uspG | pull down |
| rnk  | uspG | pull down |
| rstA | uspG | pull down |
| rutR | uspG | pull down |
| speE | uspG | pull down |
| ssuD | uspG | pull down |
| tolA | uspG | pull down |
| uidR | uspG | pull down |
| yacl | uspG | pull down |
| yacl | uspG | pull down |
| yagB | uspG | pull down |
| ycdB | uspG | pull down |
| ycdO | uspG | pull down |
| ycdX | uspG | pull down |
| ycdY | uspG | pull down |
| ydbH | uspG | pull down |
| yecF | uspG | pull down |
| yfcU | uspG | pull down |
| yfgD | uspG | pull down |
|      |      |           |
| infB | uup  | pull down |
| pqiB | uup  | pull down |
| rhsE | uup  | pull down |
| ydhQ | uup  | pull down |
| yibA | uup  | pull down |
| yibD | uup  | pull down |
|      |      |           |
| allD | uvrA | pull down |
| argG | uvrA | pull down |
| ppc  | uvrA | pull down |
| recC | uvrA | pull down |
| holC | uvrA | pull down |
| murA | uvrA | pull down |
| nusA | uvrA | pull down |
| tig  | uvrA | pull down |

|      |      |                  |
|------|------|------------------|
| nudK | uvrC | pull down        |
| ihfB | uxuB | pull down        |
| ansB | visC | pull down        |
| rdgB | visC | pull down        |
| yagR | visC | pull down        |
| frsA | wcaF | pull down        |
| lysU | wrbA | pull down        |
| gadB | yadG | pull down        |
| phnD | yadG | pull down        |
| gsp  | yaeT | pull down        |
| gsk  | yaeT | pull down        |
| nlpB | yaeT | blue native page |
| araG | yafC | pull down        |
| ddlA | yafC | pull down        |
| manX | yafC | pull down        |
| ugpC | yafC | pull down        |
| yagM | yafC | pull down        |
| ulaR | yagX | pull down        |
| glpC | yahK | blue native page |
| yaeC | yahK | pull down        |

|      |      |                                    |
|------|------|------------------------------------|
| fliY | yaiL | pull down                          |
| fldB | yajC | pull down                          |
| yajC | yajC | blue native page                   |
| napD | yajQ | pull down                          |
| napD | yajQ | pull down                          |
| rppH | yajQ | pull down                          |
| trxA | yajQ | tandem affinity purification       |
| trxA | yajQ | tandem affinity purification       |
| ybcJ | yajQ | pull down                          |
| yahl | ybaB | pull down                          |
| damX | ybaB | pull down                          |
| dam  | ybaB | pull down                          |
| gnsA | ybaB | pull down                          |
| lsrR | ybaB | pull down                          |
| xdhC | ybcD | pull down                          |
| tufA | ybeD | pull down                          |
| mreB | ybeD | pull down                          |
| trxA | ybeD | tandem affinity purification       |
| trxA | ybeD | tandem affinity purification       |
| acpP | ybgC | pull down                          |
| acpP | ybgC | affinity chromatography technology |
| acpP | ybgC | affinity chromatography technology |
| acpP | ybgC | tandem affinity purification       |
| acpP | ybgC | pull down                          |
| plsB | ybgC | adenylate cyclase complementation  |
| rluD | ybgC | pull down                          |
| adiA | ybgI | pull down                          |

acpP            ybgJ            pull down

secB            ybgK            pull down

acpS            ybiB            pull down

corC            ybiB            pull down

dinG            ybiB            pull down

greA            ybiB            pull down

infB            ybiB            pull down

moaE            ybiB            pull down

nudI            ybiB            pull down

pptA            ybiB            pull down

thyA            ybiB            pull down

yhaK            ybiB            pull down

fusA            ybjD            pull down

narQ            ybjD            pull down

rluC            ybjD            pull down

hldD            ybjX            pull down

fadI            ycaO            pull down

rluD            ycaO            pull down

secA            ycaO            pull down

uspG            ycaO            pull down

yhjS            ycaO            pull down

dapA            ycbB            pull down

smpB            ycbB            pull down

waaU            ycbB            pull down

wbbJ            ycbB            pull down

yidL            ycbB            pull down

yihI            ycbB            pull down

ypfI            ycbB            pull down

|      |      |           |
|------|------|-----------|
| bcp  | ycbG | pull down |
| flxA | ycbG | pull down |
| yejG | ycbG | pull down |

|      |      |           |
|------|------|-----------|
| nifU | ycfZ | pull down |
|------|------|-----------|

|      |      |           |
|------|------|-----------|
| hyaE | ycjT | pull down |
|------|------|-----------|

|      |      |           |
|------|------|-----------|
| ygcJ | ycjW | pull down |
|------|------|-----------|

|      |      |           |
|------|------|-----------|
| maeB | ycjZ | pull down |
| nagK | ycjZ | pull down |

|      |      |           |
|------|------|-----------|
| cspB | ydaE | pull down |
|------|------|-----------|

|      |      |           |
|------|------|-----------|
| kefG | ydaL | pull down |
|------|------|-----------|

|      |      |           |
|------|------|-----------|
| cspA | ydaY | pull down |
| cspC | ydaY | pull down |
| dusC | ydaY | pull down |



|      |      |           |
|------|------|-----------|
| hldD | ydaY | pull down |
| murB | ydaY | pull down |
| murE | ydaY | pull down |
| prmA | ydaY | pull down |
| purB | ydaY | pull down |
| rpe  | ydaY | pull down |
| rsgA | ydaY | pull down |
| surA | ydaY | pull down |
| uup  | ydaY | pull down |
| yeeN | ydaY | pull down |

|      |      |           |
|------|------|-----------|
| dnaK | ydcR | pull down |
| pabB | ydcR | pull down |

|      |      |           |
|------|------|-----------|
| lsrF | ydfG | pull down |
| mtlR | ydfG | pull down |

|      |      |           |
|------|------|-----------|
| hyaD | ydfZ | pull down |
| yeaR | ydfZ | pull down |

|      |      |           |
|------|------|-----------|
| basR | ydgH | pull down |
|------|------|-----------|

|      |      |           |
|------|------|-----------|
| tufA | ydhQ | pull down |
|------|------|-----------|

|      |      |           |
|------|------|-----------|
| clpP | ydiH | pull down |
| dnaQ | ydiH | pull down |
| mreB | ydiH | pull down |
| obgE | ydiH | pull down |

|      |      |                              |
|------|------|------------------------------|
| dppF | ydiJ | pull down                    |
| trxA | ydjA | tandem affinity purification |
| ybaK | ydjA | pull down                    |
| abgR | ydjF | pull down                    |
| fixC | ydjF | pull down                    |
| glk  | ydjF | pull down                    |
| folA | yeaG | pull down                    |
| fusA | yeaG | pull down                    |
| greA | yeaG | pull down                    |
| gcp  | yeaZ | pull down                    |
| mgIB | yebC | pull down                    |
| fucl | yebT | pull down                    |
| garL | yebT | pull down                    |
| pckA | yebT | pull down                    |
| pyrH | yebT | pull down                    |
| stfQ | yebT | pull down                    |
| idnD | yecC | pull down                    |
| uup  | yecC | pull down                    |
| aroE | yedE | pull down                    |
| pmrD | yedN | pull down                    |
| rpsL | yedN | pull down                    |
| ybeY | yedS | pull down                    |
| rlmN | yeeX | pull down                    |
| rpoD | yeeX | pull down                    |
| rpsF | yeeX | pull down                    |

|      |      |           |
|------|------|-----------|
| smpB | yeeX | pull down |
|------|------|-----------|

|      |      |           |
|------|------|-----------|
| fkpA | yeiT | pull down |
| prfB | yeiT | pull down |
| uup  | yeiT | pull down |
| ygfA | yeiT | pull down |

|      |      |           |
|------|------|-----------|
| alaS | yfaA | pull down |
|------|------|-----------|

|      |      |           |
|------|------|-----------|
| cysC | yfbU | pull down |
| mazG | yfbU | pull down |
| argI | yfbU | pull down |
| phnN | yfbU | pull down |
| ppiB | yfbU | pull down |
| rpoE | yfbU | pull down |
| -    | yfbU | pull down |
| yecF | yfbU | pull down |
| yfjY | yfbU | pull down |

|      |      |           |
|------|------|-----------|
| cysM | yfcA | pull down |
| yhdH | yfcA | pull down |

|      |      |           |
|------|------|-----------|
| ybeZ | yfcB | pull down |
| yejF | yfcB | pull down |

|      |      |           |
|------|------|-----------|
| lysU | yfcZ | pull down |
|------|------|-----------|

|      |      |           |
|------|------|-----------|
| ygaD | yfgM | pull down |
| clpP | yfiF | pull down |
| cspC | yfiF | pull down |
| cspD | yfiF | pull down |
| deaD | yfiF | pull down |
| deaD | yfiF | pull down |
| dnaQ | yfiF | pull down |
| dnaX | yfiF | pull down |
| ftsA | yfiF | pull down |
| greA | yfiF | pull down |
| hfq  | yfiF | pull down |
| holE | yfiF | pull down |
| hrpA | yfiF | pull down |
| infC | yfiF | pull down |
| kdsA | yfiF | pull down |
| lpxD | yfiF | pull down |
| murG | yfiF | pull down |
| ybeZ | yfiF | pull down |
| dnaG | yfiF | pull down |
| prsA | yfiF | pull down |
| pssA | yfiF | pull down |
| pyrH | yfiF | pull down |
| rlmL | yfiF | pull down |
| rlmN | yfiF | pull down |
| rlmN | yfiF | pull down |
| rluB | yfiF | pull down |
| rluC | yfiF | pull down |
| rluC | yfiF | pull down |
| rne  | yfiF | pull down |
| rnpA | yfiF | pull down |
| rnr  | yfiF | pull down |
| rppH | yfiF | pull down |
| rppH | yfiF | pull down |
| selB | yfiF | pull down |
| selB | yfiF | pull down |
| srlR | yfiF | pull down |
| ssb  | yfiF | pull down |
| smpB | yfiF | pull down |
| tgt  | yfiF | pull down |
| tgt  | yfiF | pull down |

|      |      |                  |
|------|------|------------------|
| tig  | yfiF | pull down        |
| trmB | yfiF | pull down        |
| uvrC | yfiF | pull down        |
| ybcJ | yfiF | pull down        |
| ybcJ | yfiF | pull down        |
| yhbY | yfiF | pull down        |
| yibL | yfiF | pull down        |
|      |      |                  |
| nlpB | yfiO | blue native page |
| atoA | yfiO | pull down        |
|      |      |                  |
| tig  | yfiP | pull down        |
|      |      |                  |
| btuD | yfjI | pull down        |
| gltL | yfjI | pull down        |
|      |      |                  |
| dusC | yfjW | pull down        |
| yiiD | yfjW | pull down        |
|      |      |                  |
| fabB | ygaC | pull down        |
| pepT | ygaC | pull down        |
| rpsN | ygaC | pull down        |
| yaIG | ygaC | pull down        |
|      |      |                  |
| cutC | ygeY | pull down        |
| fabA | ygeY | pull down        |
| fimD | ygeY | pull down        |
| rsuA | ygeY | pull down        |
| ydcS | ygeY | pull down        |
| yniA | ygeY | pull down        |
|      |      |                  |
| rcsB | ygfK | pull down        |
|      |      |                  |
| infB | ygfZ | pull down        |
| usg  | ygfZ | pull down        |
|      |      |                  |
| aroC | yghA | pull down        |
| dsdC | yghA | pull down        |
|      |      |                  |
| pheT | yghQ | pull down        |

|      |      |           |
|------|------|-----------|
| yecF | ygiN | pull down |
| cysC | ygiT | pull down |
| dinG | ygiT | pull down |
| fdhF | ygiT | pull down |
| obgE | ygiT | pull down |
| lysU | ygiW | pull down |
| ynfB | ygiW | pull down |
| rihB | yhdE | pull down |
| cheW | yhgF | pull down |
| cmoB | yhgF | pull down |
| glnK | yhgF | pull down |
| murA | yhgF | pull down |
| valS | yhgF | pull down |
| ydcP | yhgF | pull down |
| yjfF | yhgF | pull down |
| yifN | yhhK | pull down |
| dhaK | yhiH | pull down |
| fabB | yiaG | pull down |
| yqgF | yiaG | pull down |
| ubiD | yiaG | pull down |

|      |      |           |
|------|------|-----------|
| yehK | yiaG | pull down |
| groL | yibA | pull down |
| dnaK | yibA | pull down |
| solA | yibA | pull down |
| prsA | yibA | pull down |
| usg  | yibA | pull down |
| qseC | yibN | pull down |
| torA | yibN | pull down |
| accC | yiiS | pull down |
| rutC | yiiS | pull down |
| rlmB | yjeE | pull down |
| tusA | yjeE | pull down |
| yjeF | yjeE | pull down |
| mcrB | yjeF | pull down |
| rlmB | yjeF | pull down |
| uvrC | yjeF | pull down |
| yjeE | yjeF | pull down |
| aidB | yjgD | pull down |
| clpP | yjgD | pull down |

|      |      |           |
|------|------|-----------|
| dnaX | yjgD | pull down |
| fabI | yjgD | pull down |
| glbB | yjgD | pull down |
| ihfB | yjgD | pull down |
| ppa  | yjgD | pull down |
| mreB | yjgD | pull down |

|      |      |           |
|------|------|-----------|
| metN | yjhC | pull down |
|------|------|-----------|

|      |      |                              |
|------|------|------------------------------|
| trxA | yjiA | tandem affinity purification |
|------|------|------------------------------|

|      |      |           |
|------|------|-----------|
| yghA | yjiE | pull down |
|------|------|-----------|

|      |      |           |
|------|------|-----------|
| asnB | yjjI | pull down |
| dam  | yjjI | pull down |

|      |      |           |
|------|------|-----------|
| atpH | yjjK | pull down |
| psuG | yjjK | pull down |
| rpoE | yjjK | pull down |
| yagI | yjjK | pull down |
| ybbN | yjjK | pull down |
| ykgD | yjjK | pull down |

|      |      |           |
|------|------|-----------|
| yhaK | ykfA | pull down |
|------|------|-----------|

|      |      |           |
|------|------|-----------|
| aes  | yncE | pull down |
| lplA | yncE | pull down |
| rluC | yncE | pull down |
| rluC | yncE | pull down |



|      |      |                  |
|------|------|------------------|
| ybgl | yqhD | blue native page |
|------|------|------------------|

|      |      |           |
|------|------|-----------|
| fliY | yqjD | pull down |
|------|------|-----------|

|      |      |           |
|------|------|-----------|
| mtfA | yqjI | pull down |
| yacl | yqjI | pull down |

|      |      |           |
|------|------|-----------|
| murD | yrfB | pull down |
| trxC | yrfB | pull down |
| ybeD | yrfB | pull down |
| yfeZ | yrfB | pull down |

|      |      |           |
|------|------|-----------|
| glnD | ytfM | pull down |
| priC | ytfM | pull down |
| nrde | ytfM | pull down |
| sgbE | ytfM | pull down |
| ydck | ytfM | pull down |

|      |      |           |
|------|------|-----------|
| nudF | ytfN | pull down |
| glgC | ytfN | pull down |
| mukE | ytfN | pull down |
| mdoG | ytfN | pull down |
| xerD | ytfN | pull down |
| ybbO | ytfN | pull down |

|      |      |           |
|------|------|-----------|
| spoT | yubM | pull down |
| eutJ | zapA | pull down |
| ybgI | zapA | pull down |
| ydbA | zapA | pull down |

|      |      |           |
|------|------|-----------|
| yiiS | zapB | pull down |
|------|------|-----------|

| Publication 1st author    | Publication Identifier | Taxid interactor A |
|---------------------------|------------------------|--------------------|
| Arifuzzaman et al. (2006) | 16606699               | Escherichia coli   |
| Arifuzzaman et al. (2006) | 16606699               | Escherichia coli   |
| Arifuzzaman et al. (2006) | 16606699               | Escherichia coli   |
| Arifuzzaman et al. (2006) | 16606699               | Escherichia coli   |
| Arifuzzaman et al. (2006) | 16606699               | Escherichia coli   |
| Butland et al. (2005)     | 15690043               | Escherichia coli   |
| Butland et al. (2005)     | 15690043               | Escherichia coli   |
| Butland et al. (2005)     | 15690043               | Escherichia coli   |
| Butland et al. (2005)     | 15690043               | Escherichia coli   |
| Butland et al. (2005)     | 15690043               | Escherichia coli   |
| Butland et al. (2005)     | 15690043               | Escherichia coli   |
| Butland et al. (2005)     | 15690043               | Escherichia coli   |
| Butland et al. (2005)     | 15690043               | Escherichia coli   |
| Butland et al. (2005)     | 15690043               | Escherichia coli   |
| Butland et al. (2005)     | 15690043               | Escherichia coli   |
| Arifuzzaman et al. (2006) | 16606699               | Escherichia coli   |
| Butland et al. (2005)     | 15690043               | Escherichia coli   |
| Butland et al. (2005)     | 15690043               | Escherichia coli   |
| Arifuzzaman et al. (2006) | 16606699               | Escherichia coli   |
| Butland et al. (2005)     | 15690043               | Escherichia coli   |
| Butland et al. (2005)     | 15690043               | Escherichia coli   |
| Butland et al. (2005)     | 15690043               | Escherichia coli   |
| Butland et al. (2005)     | 15690043               | Escherichia coli   |
| Butland et al. (2005)     | 15690043               | Escherichia coli   |
| Arifuzzaman et al. (2006) | 16606699               | Escherichia coli   |
| Butland et al. (2005)     | 15690043               | Escherichia coli   |
| Butland et al. (2005)     | 15690043               | Escherichia coli   |
| Butland et al. (2005)     | 15690043               | Escherichia coli   |
| Arifuzzaman et al. (2006) | 16606699               | Escherichia coli   |
| Butland et al. (2005)     | 15690043               | Escherichia coli   |
| Butland et al. (2005)     | 15690043               | Escherichia coli   |
| Arifuzzaman et al. (2006) | 16606699               | Escherichia coli   |
| Butland et al. (2005)     | 15690043               | Escherichia coli   |







|                           |                           |
|---------------------------|---------------------------|
| Arifuzzaman et al. (2006) | 16606699 Escherichia coli |
| Muller et al. (2007)      | 17938168 Escherichia coli |
| Muller et al. (2007)      | 17938168 Escherichia coli |
| Arifuzzaman et al. (2006) | 16606699 Escherichia coli |
| Arifuzzaman et al. (2006) | 16606699 Escherichia coli |
| Arifuzzaman et al. (2006) | 16606699 Escherichia coli |
| Arifuzzaman et al. (2006) | 16606699 Escherichia coli |
| Arifuzzaman et al. (2006) | 16606699 Escherichia coli |
| Butland et al. (2005)     | 15690043 Escherichia coli |
| Arifuzzaman et al. (2006) | 16606699 Escherichia coli |
| Butland et al. (2005)     | 15690043 Escherichia coli |
| Butland et al. (2005)     | 15690043 Escherichia coli |
| Arifuzzaman et al. (2006) | 16606699 Escherichia coli |
| Butland et al. (2005)     | 15690043 Escherichia coli |
| Butland et al. (2005)     | 15690043 Escherichia coli |
| Butland et al. (2005)     | 15690043 Escherichia coli |
| Butland et al. (2005)     | 15690043 Escherichia coli |
| Butland et al. (2005)     | 15690043 Escherichia coli |
| Butland et al. (2005)     | 15690043 Escherichia coli |
| Butland et al. (2005)     | 15690043 Escherichia coli |
| Butland et al. (2005)     | 15690043 Escherichia coli |
| Arifuzzaman et al. (2006) | 16606699 Escherichia coli |

|                           |              |                  |
|---------------------------|--------------|------------------|
| Arifuzzaman et al. (2006) | 16606699     | Escherichia coli |
| Arifuzzaman et al. (2006) | 16606699     | Escherichia coli |
| Arifuzzaman et al. (2006) | 16606699     | Escherichia coli |
| Pan et al.                | imex:IM-9154 | Escherichia coli |
| Arifuzzaman et al. (2006) | 16606699     | Escherichia coli |
| Butland et al. (2005)     | 15690043     | Escherichia coli |
| Lasserre et al. (2006)    | 16858726     | Escherichia coli |
| Arifuzzaman et al. (2006) | 16606699     | Escherichia coli |
| Arifuzzaman et al. (2006) | 16606699     | Escherichia coli |
| Butland et al. (2005)     | 15690043     | Escherichia coli |
| Butland et al. (2005)     | 15690043     | Escherichia coli |
| Arifuzzaman et al. (2006) | 16606699     | Escherichia coli |
| Kumar et al. (2004)       | 15004283     | Escherichia coli |
| Arifuzzaman et al. (2006) | 16606699     | Escherichia coli |
| Arifuzzaman et al. (2006) | 16606699     | Escherichia coli |
| Arifuzzaman et al. (2006) | 16606699     | Escherichia coli |
| Lasserre et al. (2006)    | 16858726     | Escherichia coli |
| Butland et al. (2005)     | 15690043     | Escherichia coli |
| Huang et al. (2006)       | 17137328     | Escherichia coli |
| Huang et al. (2006)       | 17137328     | Escherichia coli |
| Stenberg et al. (2005)    | 16079137     | Escherichia coli |
| Arifuzzaman et al. (2006) | 16606699     | Escherichia coli |
| Butland et al. (2005)     | 15690043     | Escherichia coli |
| Arifuzzaman et al. (2006) | 16606699     | Escherichia coli |
| Arifuzzaman et al. (2006) | 16606699     | Escherichia coli |
| Butland et al. (2005)     | 15690043     | Escherichia coli |
| Arifuzzaman et al. (2006) | 16606699     | Escherichia coli |
| Arifuzzaman et al. (2006) | 16606699     | Escherichia coli |
| Butland et al. (2005)     | 15690043     | Escherichia coli |
| Butland et al. (2005)     | 15690043     | Escherichia coli |
| Butland et al. (2005)     | 15690043     | Escherichia coli |
| Butland et al. (2005)     | 15690043     | Escherichia coli |
| Arifuzzaman et al. (2006) | 16606699     | Escherichia coli |
| Butland et al. (2005)     | 15690043     | Escherichia coli |
| Butland et al. (2005)     | 15690043     | Escherichia coli |
| Kumar et al. (2004)       | 15004283     | Escherichia coli |
| Kumar et al. (2004)       | 15004283     | Escherichia coli |
| Arifuzzaman et al. (2006) | 16606699     | Escherichia coli |



|                           |                           |
|---------------------------|---------------------------|
| Arifuzzaman et al. (2006) | 16606699 Escherichia coli |
| Arifuzzaman et al. (2006) | 16606699 Escherichia coli |
| Arifuzzaman et al. (2006) | 16606699 Escherichia coli |
| Stenberg et al. (2005)    | 16079137 Escherichia coli |
| Arifuzzaman et al. (2006) | 16606699 Escherichia coli |
| Lasserre et al. (2006)    | 16858726 Escherichia coli |
| Stenberg et al. (2005)    | 16079137 Escherichia coli |
| Butland et al. (2005)     | 15690043 Escherichia coli |
| Arifuzzaman et al. (2006) | 16606699 Escherichia coli |
| Arifuzzaman et al. (2006) | 16606699 Escherichia coli |
| Arifuzzaman et al. (2006) | 16606699 Escherichia coli |
| Arifuzzaman et al. (2006) | 16606699 Escherichia coli |
| Arifuzzaman et al. (2006) | 16606699 Escherichia coli |
| Arifuzzaman et al. (2006) | 16606699 Escherichia coli |
| Stenberg et al. (2005)    | 16079137 Escherichia coli |
| Arifuzzaman et al. (2006) | 16606699 Escherichia coli |
| Butland et al. (2005)     | 15690043 Escherichia coli |
| Arifuzzaman et al. (2006) | 16606699 Escherichia coli |
| Arifuzzaman et al. (2006) | 16606699 Escherichia coli |
| Arifuzzaman et al. (2006) | 16606699 Escherichia coli |
| Arifuzzaman et al. (2006) | 16606699 Escherichia coli |
| Arifuzzaman et al. (2006) | 16606699 Escherichia coli |
| Arifuzzaman et al. (2006) | 16606699 Escherichia coli |
| Butland et al. (2005)     | 15690043 Escherichia coli |
| Arifuzzaman et al. (2006) | 16606699 Escherichia coli |
| Butland et al. (2005)     | 15690043 Escherichia coli |
| Arifuzzaman et al. (2006) | 16606699 Escherichia coli |

|                                |               |                  |
|--------------------------------|---------------|------------------|
| Butland et al. (2005)          | 15690043      | Escherichia coli |
| Butland et al. (2005)          | 15690043      | Escherichia coli |
| Arifuzzaman et al. (2006)      | 16606699      | Escherichia coli |
| Arifuzzaman et al. (2006)      | 16606699      | Escherichia coli |
| Arifuzzaman et al. (2006)      | 16606699      | Escherichia coli |
| Butland et al. (2005)          | 15690043      | Escherichia coli |
| Butland et al. (2005)          | 15690043      | Escherichia coli |
| Arifuzzaman et al. (2006)      | 16606699      | Escherichia coli |
| Arifuzzaman et al. (2006)      | 16606699      | Escherichia coli |
| Arifuzzaman et al. (2006)      | 16606699      | Escherichia coli |
| Arifuzzaman et al. (2006)      | 16606699      | Escherichia coli |
| Arifuzzaman et al. (2006)      | 16606699      | Escherichia coli |
| Arifuzzaman et al. (2006)      | 16606699      | Escherichia coli |
| Arifuzzaman et al. (2006)      | 16606699      | Escherichia coli |
| Butland et al. (2005)          | 15690043      | Escherichia coli |
| Butland et al. (2005)          | 15690043      | Escherichia coli |
| Lasserre et al. (2006)         | 16858726      | Escherichia coli |
| Butland et al. (2005)          | 15690043      | Escherichia coli |
| Butland et al. (2005)          | 15690043      | Escherichia coli |
| Martinez-Hackert et al. (2009) | imex:IM-12086 | Escherichia coli |
| Butland et al. (2005)          | 15690043      | Escherichia coli |
| Arifuzzaman et al. (2006)      | 16606699      | Escherichia coli |
| Kurusu et al. (2003)           | 14528295      | Escherichia coli |





































|                           |                           |
|---------------------------|---------------------------|
| Arifuzzaman et al. (2006) | 16606699 Escherichia coli |
| Arifuzzaman et al. (2006) | 16606699 Escherichia coli |
| Butland et al. (2005)     | 15690043 Escherichia coli |
| Butland et al. (2005)     | 15690043 Escherichia coli |
| Arifuzzaman et al. (2006) | 16606699 Escherichia coli |
| Butland et al. (2005)     | 15690043 Escherichia coli |
| Arifuzzaman et al. (2006) | 16606699 Escherichia coli |
| Arifuzzaman et al. (2006) | 16606699 Escherichia coli |
| Arifuzzaman et al. (2006) | 16606699 Escherichia coli |
| Arifuzzaman et al. (2006) | 16606699 Escherichia coli |
| Butland et al. (2005)     | 15690043 Escherichia coli |
| Butland et al. (2005)     | 15690043 Escherichia coli |
| Arifuzzaman et al. (2006) | 16606699 Escherichia coli |
| Arifuzzaman et al. (2006) | 16606699 Escherichia coli |
| Butland et al. (2005)     | 15690043 Escherichia coli |
| Arifuzzaman et al. (2006) | 16606699 Escherichia coli |
| Arifuzzaman et al. (2006) | 16606699 Escherichia coli |
| Arifuzzaman et al. (2006) | 16606699 Escherichia coli |
| Arifuzzaman et al. (2006) | 16606699 Escherichia coli |
| Arifuzzaman et al. (2006) | 16606699 Escherichia coli |
| Butland et al. (2005)     | 15690043 Escherichia coli |
| Arifuzzaman et al. (2006) | 16606699 Escherichia coli |
| Arifuzzaman et al. (2006) | 16606699 Escherichia coli |
| Arifuzzaman et al. (2006) | 16606699 Escherichia coli |
| Arifuzzaman et al. (2006) | 16606699 Escherichia coli |
| Arifuzzaman et al. (2006) | 16606699 Escherichia coli |

|                           |                           |
|---------------------------|---------------------------|
| Arifuzzaman et al. (2006) | 16606699 Escherichia coli |
| Arifuzzaman et al. (2006) | 16606699 Escherichia coli |

|                           |                           |
|---------------------------|---------------------------|
| Arifuzzaman et al. (2006) | 16606699 Escherichia coli |
| Butland et al. (2005)     | 15690043 Escherichia coli |

|                       |                                 |
|-----------------------|---------------------------------|
| Price et al. (2010)   | 20706981 Escherichia coli O9:H4 |
| Butland et al. (2005) | 15690043 Escherichia coli       |
| Butland et al. (2005) | 15690043 Escherichia coli       |

|                           |                               |
|---------------------------|-------------------------------|
| Butland et al. (2005)     | 15690043 Escherichia coli     |
| Butland et al. (2005)     | 15690043 Escherichia coli     |
| Butland et al. (2005)     | 15690043 Escherichia coli     |
| Butland et al. (2005)     | 15690043 Escherichia coli     |
| Butland et al. (2005)     | 15690043 Escherichia coli     |
| Butland et al. (2005)     | 15690043 Escherichia coli     |
| Butland et al. (2005)     | 15690043 Escherichia coli     |
| Butland et al. (2005)     | 15690043 Escherichia coli     |
| Butland et al. (2005)     | 15690043 Escherichia coli     |
| Arifuzzaman et al. (2006) | 16606699 Escherichia coli     |
| Butland et al. (2005)     | 15690043 Escherichia coli     |
| Arifuzzaman et al. (2006) | 16606699 Escherichia coli     |
| Butland et al. (2005)     | 15690043 Escherichia coli     |
| Butland et al. (2005)     | 15690043 Escherichia coli     |
| Lasserre et al. (2006)    | 16858726 Escherichia coli     |
| Arifuzzaman et al. (2006) | 16606699 Escherichia coli     |
| Butland et al. (2005)     | 15690043 Escherichia coli     |
| Arifuzzaman et al. (2006) | 16606699 Escherichia coli     |
| Arifuzzaman et al. (2006) | 16606699 Escherichia coli     |
| Arifuzzaman et al. (2006) | 16606699 Escherichia coli     |
| Arifuzzaman et al. (2006) | 16606699 Escherichia coli     |
| Arifuzzaman et al. (2006) | 16606699 Escherichia coli     |
| Arifuzzaman et al. (2006) | 16606699 Escherichia coli     |
| Butland et al. (2005)     | 15690043 Escherichia coli     |
| Butland et al. (2005)     | 15690043 Escherichia coli     |
| Butland et al. (2005)     | 15690043 Escherichia coli     |
| Arifuzzaman et al. (2006) | 16606699 Escherichia coli     |
| Pan et al.                | imex:IM-9154 Escherichia coli |
| Arifuzzaman et al. (2006) | 16606699 Escherichia coli     |
| Arifuzzaman et al. (2006) | 16606699 Escherichia coli     |
| Butland et al. (2005)     | 15690043 Escherichia coli     |







|                       |                           |
|-----------------------|---------------------------|
| Butland et al. (2005) | 15690043 Escherichia coli |
| Butland et al. (2005) | 15690043 Escherichia coli |
| Butland et al. (2005) | 15690043 Escherichia coli |
| Kumar et al. (2004)   | 15004283 Escherichia coli |
| Butland et al. (2005) | 15690043 Escherichia coli |
| Butland et al. (2005) | 15690043 Escherichia coli |
| Butland et al. (2005) | 15690043 Escherichia coli |
| Butland et al. (2005) | 15690043 Escherichia coli |
| Butland et al. (2005) | 15690043 Escherichia coli |
| Butland et al. (2005) | 15690043 Escherichia coli |
| Butland et al. (2005) | 15690043 Escherichia coli |

|                           |                           |
|---------------------------|---------------------------|
| Butland et al. (2005)     | 15690043 Escherichia coli |
| Arifuzzaman et al. (2006) | 16606699 Escherichia coli |
| Butland et al. (2005)     | 15690043 Escherichia coli |
| Butland et al. (2005)     | 15690043 Escherichia coli |
| Butland et al. (2005)     | 15690043 Escherichia coli |
| Butland et al. (2005)     | 15690043 Escherichia coli |
| Arifuzzaman et al. (2006) | 16606699 Escherichia coli |

|                           |                           |
|---------------------------|---------------------------|
| Butland et al. (2005)     | 15690043 Escherichia coli |
| Butland et al. (2005)     | 15690043 Escherichia coli |
| Arifuzzaman et al. (2006) | 16606699 Escherichia coli |
| Butland et al. (2005)     | 15690043 Escherichia coli |
| Butland et al. (2005)     | 15690043 Escherichia coli |
| Butland et al. (2005)     | 15690043 Escherichia coli |
| Butland et al. (2005)     | 15690043 Escherichia coli |
| Butland et al. (2005)     | 15690043 Escherichia coli |
| Butland et al. (2005)     | 15690043 Escherichia coli |
| Butland et al. (2005)     | 15690043 Escherichia coli |

|                           |                           |
|---------------------------|---------------------------|
| Arifuzzaman et al. (2006) | 16606699 Escherichia coli |
| Butland et al. (2005)     | 15690043 Escherichia coli |
| Butland et al. (2005)     | 15690043 Escherichia coli |

|                           |                           |
|---------------------------|---------------------------|
| Arifuzzaman et al. (2006) | 16606699 Escherichia coli |
|---------------------------|---------------------------|

|                       |                           |
|-----------------------|---------------------------|
| Butland et al. (2005) | 15690043 Escherichia coli |
|-----------------------|---------------------------|

|                       |                           |
|-----------------------|---------------------------|
| Butland et al. (2005) | 15690043 Escherichia coli |
|-----------------------|---------------------------|









































|                       |          |                  |
|-----------------------|----------|------------------|
| Butland et al. (2005) | 15690043 | Escherichia coli |
| Butland et al. (2005) | 15690043 | Escherichia coli |
| Butland et al. (2005) | 15690043 | Escherichia coli |

|                           |          |                  |
|---------------------------|----------|------------------|
| Arifuzzaman et al. (2006) | 16606699 | Escherichia coli |
| Arifuzzaman et al. (2006) | 16606699 | Escherichia coli |
| Arifuzzaman et al. (2006) | 16606699 | Escherichia coli |
| Arifuzzaman et al. (2006) | 16606699 | Escherichia coli |
| Butland et al. (2005)     | 15690043 | Escherichia coli |
| Butland et al. (2005)     | 15690043 | Escherichia coli |
| Arifuzzaman et al. (2006) | 16606699 | Escherichia coli |
| Butland et al. (2005)     | 15690043 | Escherichia coli |
| Butland et al. (2005)     | 15690043 | Escherichia coli |
| Arifuzzaman et al. (2006) | 16606699 | Escherichia coli |
| Arifuzzaman et al. (2006) | 16606699 | Escherichia coli |
| Arifuzzaman et al. (2006) | 16606699 | Escherichia coli |
| Arifuzzaman et al. (2006) | 16606699 | Escherichia coli |

|                           |          |                  |
|---------------------------|----------|------------------|
| Vargason et al. (2000)    | 10966645 | Escherichia coli |
| Arifuzzaman et al. (2006) | 16606699 | Escherichia coli |
| Arifuzzaman et al. (2006) | 16606699 | Escherichia coli |
| Arifuzzaman et al. (2006) | 16606699 | Escherichia coli |

|                           |          |                  |
|---------------------------|----------|------------------|
| Arifuzzaman et al. (2006) | 16606699 | Escherichia coli |
| Arifuzzaman et al. (2006) | 16606699 | Escherichia coli |
| Butland et al. (2005)     | 15690043 | Escherichia coli |
| Arifuzzaman et al. (2006) | 16606699 | Escherichia coli |
| Butland et al. (2005)     | 15690043 | Escherichia coli |
| Butland et al. (2005)     | 15690043 | Escherichia coli |
| Arifuzzaman et al. (2006) | 16606699 | Escherichia coli |
| Butland et al. (2005)     | 15690043 | Escherichia coli |
| Arifuzzaman et al. (2006) | 16606699 | Escherichia coli |
| Butland et al. (2005)     | 15690043 | Escherichia coli |
| Butland et al. (2005)     | 15690043 | Escherichia coli |
| Arifuzzaman et al. (2006) | 16606699 | Escherichia coli |
| Arifuzzaman et al. (2006) | 16606699 | Escherichia coli |
| Butland et al. (2005)     | 15690043 | Escherichia coli |
| Arifuzzaman et al. (2006) | 16606699 | Escherichia coli |
| Butland et al. (2005)     | 15690043 | Escherichia coli |

|                           |          |                  |
|---------------------------|----------|------------------|
| Butland et al. (2005)     | 15690043 | Escherichia coli |
| Arifuzzaman et al. (2006) | 16606699 | Escherichia coli |
| Arifuzzaman et al. (2006) | 16606699 | Escherichia coli |
| Butland et al. (2005)     | 15690043 | Escherichia coli |
| Butland et al. (2005)     | 15690043 | Escherichia coli |
| Kumar et al. (2004)       | 15004283 | Escherichia coli |
| Kumar et al. (2004)       | 15004283 | Escherichia coli |
| Arifuzzaman et al. (2006) | 16606699 | Escherichia coli |
| Arifuzzaman et al. (2006) | 16606699 | Escherichia coli |
| Arifuzzaman et al. (2006) | 16606699 | Escherichia coli |
| Arifuzzaman et al. (2006) | 16606699 | Escherichia coli |

|                     |          |                  |
|---------------------|----------|------------------|
| Kumar et al. (2004) | 15004283 | Escherichia coli |
|---------------------|----------|------------------|

|                           |              |                  |
|---------------------------|--------------|------------------|
| Lasserre et al. (2006)    | 16858726     | Escherichia coli |
| Pan et al.                | imex:IM-9154 | Escherichia coli |
| Butland et al. (2005)     | 15690043     | Escherichia coli |
| Butland et al. (2005)     | 15690043     | Escherichia coli |
| Arifuzzaman et al. (2006) | 16606699     | Escherichia coli |
| Arifuzzaman et al. (2006) | 16606699     | Escherichia coli |
| Arifuzzaman et al. (2006) | 16606699     | Escherichia coli |
| Arifuzzaman et al. (2006) | 16606699     | Escherichia coli |
| Kumar et al. (2004)       | 15004283     | Escherichia coli |

|                        |          |                  |
|------------------------|----------|------------------|
| Butland et al. (2005)  | 15690043 | Escherichia coli |
| Butland et al. (2005)  | 15690043 | Escherichia coli |
| Butland et al. (2005)  | 15690043 | Escherichia coli |
| Butland et al. (2005)  | 15690043 | Escherichia coli |
| Butland et al. (2005)  | 15690043 | Escherichia coli |
| Butland et al. (2005)  | 15690043 | Escherichia coli |
| Butland et al. (2005)  | 15690043 | Escherichia coli |
| Butland et al. (2005)  | 15690043 | Escherichia coli |
| Butland et al. (2005)  | 15690043 | Escherichia coli |
| Butland et al. (2005)  | 15690043 | Escherichia coli |
| Butland et al. (2005)  | 15690043 | Escherichia coli |
| Butland et al. (2005)  | 15690043 | Escherichia coli |
| Butland et al. (2005)  | 15690043 | Escherichia coli |
| Butland et al. (2005)  | 15690043 | Escherichia coli |
| Butland et al. (2005)  | 15690043 | Escherichia coli |
| Butland et al. (2005)  | 15690043 | Escherichia coli |
| Butland et al. (2005)  | 15690043 | Escherichia coli |
| Butland et al. (2005)  | 15690043 | Escherichia coli |
| Butland et al. (2005)  | 15690043 | Escherichia coli |
| Lasserre et al. (2006) | 16858726 | Escherichia coli |









|                         |          |                  |
|-------------------------|----------|------------------|
| Regonesi et al. (2006)  | 16139413 | Escherichia coli |
| Callaghan et al. (2004) | 15236960 | Escherichia coli |
| Butland et al. (2005)   | 15690043 | Escherichia coli |
| Butland et al. (2005)   | 15690043 | Escherichia coli |
| Butland et al. (2005)   | 15690043 | Escherichia coli |
| Butland et al. (2005)   | 15690043 | Escherichia coli |
| Butland et al. (2005)   | 15690043 | Escherichia coli |
| Kumar et al. (2004)     | 15004283 | Escherichia coli |
| Kumar et al. (2004)     | 15004283 | Escherichia coli |
| Butland et al. (2005)   | 15690043 | Escherichia coli |

|                           |          |                  |
|---------------------------|----------|------------------|
| Butland et al. (2005)     | 15690043 | Escherichia coli |
| Arifuzzaman et al. (2006) | 16606699 | Escherichia coli |

|                                |               |                  |
|--------------------------------|---------------|------------------|
| Kumar et al. (2004)            | 15004283      | Escherichia coli |
| Kumar et al. (2004)            | 15004283      | Escherichia coli |
| Martinez-Hackert et al. (2009) | imex:IM-12086 | Escherichia coli |
| Arifuzzaman et al. (2006)      | 16606699      | Escherichia coli |

|                       |          |                  |
|-----------------------|----------|------------------|
| Gully et al. (2006)   | 16294310 | Escherichia coli |
| Butland et al. (2005) | 15690043 | Escherichia coli |
| Butland et al. (2005) | 15690043 | Escherichia coli |

|                           |          |                  |
|---------------------------|----------|------------------|
| Arifuzzaman et al. (2006) | 16606699 | Escherichia coli |
|---------------------------|----------|------------------|

|                           |          |                  |
|---------------------------|----------|------------------|
| Butland et al. (2005)     | 15690043 | Escherichia coli |
| Gully et al. (2006)       | 16294310 | Escherichia coli |
| Butland et al. (2005)     | 15690043 | Escherichia coli |
| Arifuzzaman et al. (2006) | 16606699 | Escherichia coli |
| Arifuzzaman et al. (2006) | 16606699 | Escherichia coli |

|                       |          |                  |
|-----------------------|----------|------------------|
| Butland et al. (2005) | 15690043 | Escherichia coli |
| Butland et al. (2005) | 15690043 | Escherichia coli |
| Kumar et al. (2004)   | 15004283 | Escherichia coli |

|                       |          |                  |
|-----------------------|----------|------------------|
| Butland et al. (2005) | 15690043 | Escherichia coli |
| Butland et al. (2005) | 15690043 | Escherichia coli |

|                           |          |                  |
|---------------------------|----------|------------------|
| Arifuzzaman et al. (2006) | 16606699 | Escherichia coli |
| Kumar et al. (2004)       | 15004283 | Escherichia coli |
| Arifuzzaman et al. (2006) | 16606699 | Escherichia coli |



|                           |                           |
|---------------------------|---------------------------|
| Arifuzzaman et al. (2006) | 16606699 Escherichia coli |
| Butland et al. (2005)     | 15690043 Escherichia coli |
| Butland et al. (2005)     | 15690043 Escherichia coli |
| Butland et al. (2005)     | 15690043 Escherichia coli |
| Arifuzzaman et al. (2006) | 16606699 Escherichia coli |
| Arifuzzaman et al. (2006) | 16606699 Escherichia coli |
| Butland et al. (2005)     | 15690043 Escherichia coli |
| Butland et al. (2005)     | 15690043 Escherichia coli |
| Kumar et al. (2004)       | 15004283 Escherichia coli |
| Arifuzzaman et al. (2006) | 16606699 Escherichia coli |
| Arifuzzaman et al. (2006) | 16606699 Escherichia coli |
| Arifuzzaman et al. (2006) | 16606699 Escherichia coli |
| Butland et al. (2005)     | 15690043 Escherichia coli |
| Butland et al. (2005)     | 15690043 Escherichia coli |
| Arifuzzaman et al. (2006) | 16606699 Escherichia coli |
| Arifuzzaman et al. (2006) | 16606699 Escherichia coli |
| Arifuzzaman et al. (2006) | 16606699 Escherichia coli |
| Lasserre et al. (2006)    | 16858726 Escherichia coli |
| Arifuzzaman et al. (2006) | 16606699 Escherichia coli |
| Arifuzzaman et al. (2006) | 16606699 Escherichia coli |
| Arifuzzaman et al. (2006) | 16606699 Escherichia coli |
| Arifuzzaman et al. (2006) | 16606699 Escherichia coli |
| Arifuzzaman et al. (2006) | 16606699 Escherichia coli |
| Arifuzzaman et al. (2006) | 16606699 Escherichia coli |
| Arifuzzaman et al. (2006) | 16606699 Escherichia coli |
| Butland et al. (2005)     | 15690043 Escherichia coli |
| Arifuzzaman et al. (2006) | 16606699 Escherichia coli |
| Arifuzzaman et al. (2006) | 16606699 Escherichia coli |
| Arifuzzaman et al. (2006) | 16606699 Escherichia coli |
| Arifuzzaman et al. (2006) | 16606699 Escherichia coli |
| Kumar et al. (2004)       | 15004283 Escherichia coli |
| Arifuzzaman et al. (2006) | 16606699 Escherichia coli |
| Arifuzzaman et al. (2006) | 16606699 Escherichia coli |

|                                     |               |                  |
|-------------------------------------|---------------|------------------|
| Ollagnier-de-Choudens et al. (2001) | 11319236      | Escherichia coli |
| Ollagnier-de-Choudens et al. (2001) | 11319236      | Escherichia coli |
| Rajagopala et al. (2009)            | 19834901      | Escherichia coli |
| Butland et al. (2005)               | 15690043      | Escherichia coli |
| Arifuzzaman et al. (2006)           | 16606699      | Escherichia coli |
| Arifuzzaman et al. (2006)           | 16606699      | Escherichia coli |
| Arifuzzaman et al. (2006)           | 16606699      | Escherichia coli |
| Remaut et al. (2008)                | imex:IM-11919 | Escherichia coli |
| Remaut et al. (2008)                | imex:IM-11919 | Escherichia coli |
| Le et al. (2010)                    | imex:IM-14143 | Escherichia coli |
| Remaut et al. (2008)                | imex:IM-11919 | Escherichia coli |
| Remaut et al. (2008)                | imex:IM-11919 | Escherichia coli |
| Le et al. (2010)                    | imex:IM-14143 | Escherichia coli |
| Hung et al. (2002)                  | 12010488      | Escherichia coli |
| Hung et al. (2002)                  | 12010488      | Escherichia coli |
| Choudhury et al. (1999)             | 10446051      | Escherichia coli |
| Remaut et al. (2008)                | imex:IM-11919 | Escherichia coli |
| Remaut et al. (2008)                | imex:IM-11919 | Escherichia coli |
| Le et al. (2010)                    | imex:IM-14143 | Escherichia coli |
| Butland et al. (2005)               | 15690043      | Escherichia coli |
| Butland et al. (2005)               | 15690043      | Escherichia coli |
| Butland et al. (2005)               | 15690043      | Escherichia coli |
| Arifuzzaman et al. (2006)           | 16606699      | Escherichia coli |
| Arifuzzaman et al. (2006)           | 16606699      | Escherichia coli |
| Arifuzzaman et al. (2006)           | 16606699      | Escherichia coli |
| Kumar et al. (2004)                 | 15004283      | Escherichia coli |
| Butland et al. (2005)               | 15690043      | Escherichia coli |
| Arifuzzaman et al. (2006)           | 16606699      | Escherichia coli |
| Rajagopala et al. (2009)            | 19834901      | Escherichia coli |

|                           |                           |
|---------------------------|---------------------------|
| Arifuzzaman et al. (2006) | 16606699 Escherichia coli |
| Arifuzzaman et al. (2006) | 16606699 Escherichia coli |
| Arifuzzaman et al. (2006) | 16606699 Escherichia coli |
| Arifuzzaman et al. (2006) | 16606699 Escherichia coli |
| Arifuzzaman et al. (2006) | 16606699 Escherichia coli |
| Rajagopala et al. (2009)  | 19834901 Escherichia coli |
| Rajagopala et al. (2009)  | 19834901 Escherichia coli |
| Marykwas et al. (1996)    | 8604139 Escherichia coli  |
| Rajagopala et al. (2009)  | 19834901 Escherichia coli |
| Rajagopala et al. (2009)  | 19834901 Escherichia coli |
| Rajagopala et al. (2009)  | 19834901 Escherichia coli |
| Rajagopala et al. (2009)  | 19834901 Escherichia coli |
| Rajagopala et al. (2009)  | 19834901 Escherichia coli |
| Rajagopala et al. (2009)  | 19834901 Escherichia coli |
| Rajagopala et al. (2009)  | 19834901 Escherichia coli |
| Arifuzzaman et al. (2006) | 16606699 Escherichia coli |
| Rajagopala et al. (2009)  | 19834901 Escherichia coli |
| Rajagopala et al. (2009)  | 19834901 Escherichia coli |
| Rajagopala et al. (2009)  | 19834901 Escherichia coli |
| Rajagopala et al. (2009)  | 19834901 Escherichia coli |
| Rajagopala et al. (2009)  | 19834901 Escherichia coli |
| Rajagopala et al. (2009)  | 19834901 Escherichia coli |
| Rajagopala et al. (2009)  | 19834901 Escherichia coli |
| Arifuzzaman et al. (2006) | 16606699 Escherichia coli |
| Arifuzzaman et al. (2006) | 16606699 Escherichia coli |
| Rajagopala et al. (2009)  | 19834901 Escherichia coli |
| Arifuzzaman et al. (2006) | 16606699 Escherichia coli |
| Arifuzzaman et al. (2006) | 16606699 Escherichia coli |
| Arifuzzaman et al. (2006) | 16606699 Escherichia coli |
| Arifuzzaman et al. (2006) | 16606699 Escherichia coli |
| Arifuzzaman et al. (2006) | 16606699 Escherichia coli |
| Arifuzzaman et al. (2006) | 16606699 Escherichia coli |
| Lasserre et al. (2006)    | 16858726 Escherichia coli |
| Butland et al. (2005)     | 15690043 Escherichia coli |









Arifuzzaman et al. (2006) 16606699 Escherichia coli  
Arifuzzaman et al. (2006) 16606699 Escherichia coli

Arifuzzaman et al. (2006) 16606699 Escherichia coli  
Arifuzzaman et al. (2006) 16606699 Escherichia coli  
Arifuzzaman et al. (2006) 16606699 Escherichia coli  
Arifuzzaman et al. (2006) 16606699 Escherichia coli  
Arifuzzaman et al. (2006) 16606699 Escherichia coli  
Arifuzzaman et al. (2006) 16606699 Escherichia coli  
Arifuzzaman et al. (2006) 16606699 Escherichia coli

Arifuzzaman et al. (2006) 16606699 Escherichia coli  
Arifuzzaman et al. (2006) 16606699 Escherichia coli  
Arifuzzaman et al. (2006) 16606699 Escherichia coli  
Arifuzzaman et al. (2006) 16606699 Escherichia coli

Arifuzzaman et al. (2006) 16606699 Escherichia coli  
Arifuzzaman et al. (2006) 16606699 Escherichia coli  
Arifuzzaman et al. (2006) 16606699 Escherichia coli  
Arifuzzaman et al. (2006) 16606699 Escherichia coli  
Arifuzzaman et al. (2006) 16606699 Escherichia coli  
Arifuzzaman et al. (2006) 16606699 Escherichia coli  
Arifuzzaman et al. (2006) 16606699 Escherichia coli  
Arifuzzaman et al. (2006) 16606699 Escherichia coli  
Arifuzzaman et al. (2006) 16606699 Escherichia coli

Butland et al. (2005) 15690043 Escherichia coli

Arifuzzaman et al. (2006) 16606699 Escherichia coli  
Butland et al. (2005) 15690043 Escherichia coli

Arifuzzaman et al. (2006) 16606699 Escherichia coli  
Arifuzzaman et al. (2006) 16606699 Escherichia coli

Martinez-Hackert et al. (2009) imex:IM-12086 Escherichia coli

Bochkareva et al. (2002) 12071968 Escherichia coli  
Butland et al. (2005) 15690043 Escherichia coli













|                           |                           |
|---------------------------|---------------------------|
| Arifuzzaman et al. (2006) | 16606699 Escherichia coli |
| Arifuzzaman et al. (2006) | 16606699 Escherichia coli |
| Butland et al. (2005)     | 15690043 Escherichia coli |
| Arifuzzaman et al. (2006) | 16606699 Escherichia coli |
| Arifuzzaman et al. (2006) | 16606699 Escherichia coli |
| Lasserre et al. (2006)    | 16858726 Escherichia coli |
| Arifuzzaman et al. (2006) | 16606699 Escherichia coli |
| Arifuzzaman et al. (2006) | 16606699 Escherichia coli |
| Arifuzzaman et al. (2006) | 16606699 Escherichia coli |
| Arifuzzaman et al. (2006) | 16606699 Escherichia coli |
| Arifuzzaman et al. (2006) | 16606699 Escherichia coli |
| Arifuzzaman et al. (2006) | 16606699 Escherichia coli |
| Arifuzzaman et al. (2006) | 16606699 Escherichia coli |
| Arifuzzaman et al. (2006) | 16606699 Escherichia coli |
| Arifuzzaman et al. (2006) | 16606699 Escherichia coli |
| Arifuzzaman et al. (2006) | 16606699 Escherichia coli |
| Arifuzzaman et al. (2006) | 16606699 Escherichia coli |
| Arifuzzaman et al. (2006) | 16606699 Escherichia coli |
| Arifuzzaman et al. (2006) | 16606699 Escherichia coli |

|                           |                           |
|---------------------------|---------------------------|
| Butland et al. (2005)     | 15690043 Escherichia coli |
| Butland et al. (2005)     | 15690043 Escherichia coli |
| Lasserre et al. (2006)    | 16858726 Escherichia coli |
| Butland et al. (2005)     | 15690043 Escherichia coli |
| Butland et al. (2005)     | 15690043 Escherichia coli |
| Arifuzzaman et al. (2006) | 16606699 Escherichia coli |
| Butland et al. (2005)     | 15690043 Escherichia coli |
| Butland et al. (2005)     | 15690043 Escherichia coli |
| Butland et al. (2005)     | 15690043 Escherichia coli |
| Arifuzzaman et al. (2006) | 16606699 Escherichia coli |

|                       |                           |
|-----------------------|---------------------------|
| Butland et al. (2005) | 15690043 Escherichia coli |
|-----------------------|---------------------------|

|                           |                           |
|---------------------------|---------------------------|
| Arifuzzaman et al. (2006) | 16606699 Escherichia coli |
| Arifuzzaman et al. (2006) | 16606699 Escherichia coli |

|                           |                           |
|---------------------------|---------------------------|
| Arifuzzaman et al. (2006) | 16606699 Escherichia coli |
|---------------------------|---------------------------|

|                           |                           |
|---------------------------|---------------------------|
| Arifuzzaman et al. (2006) | 16606699 Escherichia coli |
| Arifuzzaman et al. (2006) | 16606699 Escherichia coli |

|                           |              |                  |
|---------------------------|--------------|------------------|
| Arifuzzaman et al. (2006) | 16606699     | Escherichia coli |
| Arifuzzaman et al. (2006) | 16606699     | Escherichia coli |
| Arifuzzaman et al. (2006) | 16606699     | Escherichia coli |
| Arifuzzaman et al. (2006) | 16606699     | Escherichia coli |
| Arifuzzaman et al. (2006) | 16606699     | Escherichia coli |
| Butland et al. (2005)     | 15690043     | Escherichia coli |
| Lasserre et al. (2006)    | 16858726     | Escherichia coli |
| Arifuzzaman et al. (2006) | 16606699     | Escherichia coli |
| Rajagopala et al. (2009)  | 19834901     | Escherichia coli |
| Rajagopala et al. (2009)  | 19834901     | Escherichia coli |
| Butland et al. (2005)     | 15690043     | Escherichia coli |
| Butland et al. (2005)     | 15690043     | Escherichia coli |
| Pan et al.                | imex:IM-9154 | Escherichia coli |
| Arifuzzaman et al. (2006) | 16606699     | Escherichia coli |
| Butland et al. (2005)     | 15690043     | Escherichia coli |
| Arifuzzaman et al. (2006) | 16606699     | Escherichia coli |
| Butland et al. (2005)     | 15690043     | Escherichia coli |
| Butland et al. (2005)     | 15690043     | Escherichia coli |
| Arifuzzaman et al. (2006) | 16606699     | Escherichia coli |
| Butland et al. (2005)     | 15690043     | Escherichia coli |
| Rajagopala et al. (2009)  | 19834901     | Escherichia coli |
| Butland et al. (2005)     | 15690043     | Escherichia coli |
| Butland et al. (2005)     | 15690043     | Escherichia coli |
| Butland et al. (2005)     | 15690043     | Escherichia coli |
| Butland et al. (2005)     | 15690043     | Escherichia coli |
| Butland et al. (2005)     | 15690043     | Escherichia coli |
| Arifuzzaman et al. (2006) | 16606699     | Escherichia coli |
| Arifuzzaman et al. (2006) | 16606699     | Escherichia coli |
| Butland et al. (2005)     | 15690043     | Escherichia coli |
| Butland et al. (2005)     | 15690043     | Escherichia coli |
| Butland et al. (2005)     | 15690043     | Escherichia coli |
| Butland et al. (2005)     | 15690043     | Escherichia coli |
| Butland et al. (2005)     | 15690043     | Escherichia coli |
| Butland et al. (2005)     | 15690043     | Escherichia coli |
| Butland et al. (2005)     | 15690043     | Escherichia coli |
| Butland et al. (2005)     | 15690043     | Escherichia coli |
| Butland et al. (2005)     | 15690043     | Escherichia coli |
| Butland et al. (2005)     | 15690043     | Escherichia coli |
| Arifuzzaman et al. (2006) | 16606699     | Escherichia coli |
| Arifuzzaman et al. (2006) | 16606699     | Escherichia coli |















|                           |                           |
|---------------------------|---------------------------|
| Kumar et al. (2004)       | 15004283 Escherichia coli |
| Kumar et al. (2004)       | 15004283 Escherichia coli |
| Arifuzzaman et al. (2006) | 16606699 Escherichia coli |
| Butland et al. (2005)     | 15690043 Escherichia coli |
| Lasserre et al. (2006)    | 16858726 Escherichia coli |
| Arifuzzaman et al. (2006) | 16606699 Escherichia coli |
| Butland et al. (2005)     | 15690043 Escherichia coli |
| Arifuzzaman et al. (2006) | 16606699 Escherichia coli |
| Arifuzzaman et al. (2006) | 16606699 Escherichia coli |
| Butland et al. (2005)     | 15690043 Escherichia coli |
| Butland et al. (2005)     | 15690043 Escherichia coli |
| Arifuzzaman et al. (2006) | 16606699 Escherichia coli |
| Butland et al. (2005)     | 15690043 Escherichia coli |
| Arifuzzaman et al. (2006) | 16606699 Escherichia coli |
| Butland et al. (2005)     | 15690043 Escherichia coli |
| Butland et al. (2005)     | 15690043 Escherichia coli |
| Arifuzzaman et al. (2006) | 16606699 Escherichia coli |
| Butland et al. (2005)     | 15690043 Escherichia coli |
| Butland et al. (2005)     | 15690043 Escherichia coli |
| Butland et al. (2005)     | 15690043 Escherichia coli |
| Arifuzzaman et al. (2006) | 16606699 Escherichia coli |
| Butland et al. (2005)     | 15690043 Escherichia coli |
| Arifuzzaman et al. (2006) | 16606699 Escherichia coli |
| Arifuzzaman et al. (2006) | 16606699 Escherichia coli |
| Butland et al. (2005)     | 15690043 Escherichia coli |
| Butland et al. (2005)     | 15690043 Escherichia coli |
| Butland et al. (2005)     | 15690043 Escherichia coli |
| Butland et al. (2005)     | 15690043 Escherichia coli |
| Butland et al. (2005)     | 15690043 Escherichia coli |

|                           |                           |
|---------------------------|---------------------------|
| Arifuzzaman et al. (2006) | 16606699 Escherichia coli |
| Butland et al. (2005)     | 15690043 Escherichia coli |
| Arifuzzaman et al. (2006) | 16606699 Escherichia coli |
| Arifuzzaman et al. (2006) | 16606699 Escherichia coli |
| Arifuzzaman et al. (2006) | 16606699 Escherichia coli |
| Arifuzzaman et al. (2006) | 16606699 Escherichia coli |
| Butland et al. (2005)     | 15690043 Escherichia coli |
| Butland et al. (2005)     | 15690043 Escherichia coli |
| Arifuzzaman et al. (2006) | 16606699 Escherichia coli |

|                           |                           |
|---------------------------|---------------------------|
| Butland et al. (2005)     | 15690043 Escherichia coli |
| Arifuzzaman et al. (2006) | 16606699 Escherichia coli |
| Butland et al. (2005)     | 15690043 Escherichia coli |
| Butland et al. (2005)     | 15690043 Escherichia coli |

|                       |                           |
|-----------------------|---------------------------|
| Butland et al. (2005) | 15690043 Escherichia coli |
|-----------------------|---------------------------|

|                      |                           |
|----------------------|---------------------------|
| Yajima et al. (2004) | 15336558 Escherichia coli |
|----------------------|---------------------------|

|                           |                           |
|---------------------------|---------------------------|
| Arifuzzaman et al. (2006) | 16606699 Escherichia coli |
| Arifuzzaman et al. (2006) | 16606699 Escherichia coli |
| Arifuzzaman et al. (2006) | 16606699 Escherichia coli |
| Arifuzzaman et al. (2006) | 16606699 Escherichia coli |
| Arifuzzaman et al. (2006) | 16606699 Escherichia coli |
| Arifuzzaman et al. (2006) | 16606699 Escherichia coli |
| Arifuzzaman et al. (2006) | 16606699 Escherichia coli |
| Arifuzzaman et al. (2006) | 16606699 Escherichia coli |
| Arifuzzaman et al. (2006) | 16606699 Escherichia coli |

|                           |                           |
|---------------------------|---------------------------|
| Arifuzzaman et al. (2006) | 16606699 Escherichia coli |
|---------------------------|---------------------------|

|                           |                           |
|---------------------------|---------------------------|
| Gully et al. (2006)       | 16294310 Escherichia coli |
| Arifuzzaman et al. (2006) | 16606699 Escherichia coli |
| Arifuzzaman et al. (2006) | 16606699 Escherichia coli |
| Arifuzzaman et al. (2006) | 16606699 Escherichia coli |
| Arifuzzaman et al. (2006) | 16606699 Escherichia coli |
| Arifuzzaman et al. (2006) | 16606699 Escherichia coli |
| Butland et al. (2005)     | 15690043 Escherichia coli |
| Arifuzzaman et al. (2006) | 16606699 Escherichia coli |





Arifuzzaman et al. (2006) 16606699 Escherichia coli  
Arifuzzaman et al. (2006) 16606699 Escherichia coli

Arifuzzaman et al. (2006) 16606699 Escherichia coli  
Butland et al. (2005) 15690043 Escherichia coli  
Butland et al. (2005) 15690043 Escherichia coli  
Butland et al. (2005) 15690043 Escherichia coli  
Arifuzzaman et al. (2006) 16606699 Escherichia coli  
Kumar et al. (2004) 15004283 Escherichia coli

Arifuzzaman et al. (2006) 16606699 Escherichia coli  
Butland et al. (2005) 15690043 Escherichia coli

Arifuzzaman et al. (2006) 16606699 Escherichia coli  
Butland et al. (2005) 15690043 Escherichia coli  
Butland et al. (2005) 15690043 Escherichia coli

Arifuzzaman et al. (2006) 16606699 Escherichia coli  
Butland et al. (2005) 15690043 Escherichia coli  
Regonesi et al. (2006) 16139413 Escherichia coli

Arifuzzaman et al. (2006) 16606699 Escherichia coli





|                           |              |                           |
|---------------------------|--------------|---------------------------|
| Arifuzzaman et al. (2006) |              | 16606699 Escherichia coli |
| Arifuzzaman et al. (2006) |              | 16606699 Escherichia coli |
| Arifuzzaman et al. (2006) |              | 16606699 Escherichia coli |
| Arifuzzaman et al. (2006) |              | 16606699 Escherichia coli |
| Arifuzzaman et al. (2006) |              | 16606699 Escherichia coli |
| Arifuzzaman et al. (2006) |              | 16606699 Escherichia coli |
| Arifuzzaman et al. (2006) |              | 16606699 Escherichia coli |
| Arifuzzaman et al. (2006) |              | 16606699 Escherichia coli |
| Arifuzzaman et al. (2006) |              | 16606699 Escherichia coli |
| Arifuzzaman et al. (2006) |              | 16606699 Escherichia coli |
| Arifuzzaman et al. (2006) |              | 16606699 Escherichia coli |
| Arifuzzaman et al. (2006) |              | 16606699 Escherichia coli |
| Arifuzzaman et al. (2006) |              | 16606699 Escherichia coli |
| Arifuzzaman et al. (2006) |              | 16606699 Escherichia coli |
| Arifuzzaman et al. (2006) |              | 16606699 Escherichia coli |
| Arifuzzaman et al. (2006) |              | 16606699 Escherichia coli |
| Arifuzzaman et al. (2006) |              | 16606699 Escherichia coli |
| Pan et al.                | imex:IM-9154 | Escherichia coli          |
| Arifuzzaman et al. (2006) |              | 16606699 Escherichia coli |
| Butland et al. (2005)     |              | 15690043 Escherichia coli |
| Kumar et al. (2004)       |              | 15004283 Escherichia coli |
| Butland et al. (2005)     |              | 15690043 Escherichia coli |
| Stenberg et al. (2005)    |              | 16079137 Escherichia coli |
| Arifuzzaman et al. (2006) |              | 16606699 Escherichia coli |
| Butland et al. (2005)     |              | 15690043 Escherichia coli |
| Butland et al. (2005)     |              | 15690043 Escherichia coli |
| Butland et al. (2005)     |              | 15690043 Escherichia coli |
| Arifuzzaman et al. (2006) |              | 16606699 Escherichia coli |
| Arifuzzaman et al. (2006) |              | 16606699 Escherichia coli |
| Arifuzzaman et al. (2006) |              | 16606699 Escherichia coli |
| Arifuzzaman et al. (2006) |              | 16606699 Escherichia coli |
| Arifuzzaman et al. (2006) |              | 16606699 Escherichia coli |
| Arifuzzaman et al. (2006) |              | 16606699 Escherichia coli |
| Arifuzzaman et al. (2006) |              | 16606699 Escherichia coli |
| Arifuzzaman et al. (2006) |              | 16606699 Escherichia coli |
| Butland et al. (2005)     |              | 15690043 Escherichia coli |
| Arifuzzaman et al. (2006) |              | 16606699 Escherichia coli |



|                                |               |                  |
|--------------------------------|---------------|------------------|
| Arifuzzaman et al. (2006)      | 16606699      | Escherichia coli |
| Stenberg et al. (2005)         | 16079137      | Escherichia coli |
| Arifuzzaman et al. (2006)      | 16606699      | Escherichia coli |
| Arifuzzaman et al. (2006)      | 16606699      | Escherichia coli |
| Arifuzzaman et al. (2006)      | 16606699      | Escherichia coli |
| Arifuzzaman et al. (2006)      | 16606699      | Escherichia coli |
| Arifuzzaman et al. (2006)      | 16606699      | Escherichia coli |
| Butland et al. (2005)          | 15690043      | Escherichia coli |
| Butland et al. (2005)          | 15690043      | Escherichia coli |
| Butland et al. (2005)          | 15690043      | Escherichia coli |
| Butland et al. (2005)          | 15690043      | Escherichia coli |
| Butland et al. (2005)          | 15690043      | Escherichia coli |
| Arifuzzaman et al. (2006)      | 16606699      | Escherichia coli |
| Arifuzzaman et al. (2006)      | 16606699      | Escherichia coli |
| Arifuzzaman et al. (2006)      | 16606699      | Escherichia coli |
| Arifuzzaman et al. (2006)      | 16606699      | Escherichia coli |
| Arifuzzaman et al. (2006)      | 16606699      | Escherichia coli |
| Arifuzzaman et al. (2006)      | 16606699      | Escherichia coli |
| Martinez-Hackert et al. (2009) | imex:IM-12086 | Escherichia coli |
| Arifuzzaman et al. (2006)      | 16606699      | Escherichia coli |
| Arifuzzaman et al. (2006)      | 16606699      | Escherichia coli |
| Arifuzzaman et al. (2006)      | 16606699      | Escherichia coli |
| Arifuzzaman et al. (2006)      | 16606699      | Escherichia coli |
| Butland et al. (2005)          | 15690043      | Escherichia coli |
| Sharma et al. (2008)           | imex:IM-11954 | Escherichia coli |
| Sharma et al. (2008)           | imex:IM-11954 | Escherichia coli |
| Sharma et al. (2008)           | imex:IM-11954 | Escherichia coli |
| Sharma et al. (2008)           | imex:IM-11954 | Escherichia coli |
| Sharma et al. (2008)           | imex:IM-11954 | Escherichia coli |
| Sharma et al. (2008)           | imex:IM-11954 | Escherichia coli |
| Arifuzzaman et al. (2006)      | 16606699      | Escherichia coli |
| Pan et al.                     | imex:IM-9154  | Escherichia coli |

|                           |                           |
|---------------------------|---------------------------|
| Kumar et al. (2004)       | 15004283 Escherichia coli |
| Butland et al. (2005)     | 15690043 Escherichia coli |
| Butland et al. (2005)     | 15690043 Escherichia coli |
| Butland et al. (2005)     | 15690043 Escherichia coli |
| Butland et al. (2005)     | 15690043 Escherichia coli |
| Butland et al. (2005)     | 15690043 Escherichia coli |
| Butland et al. (2005)     | 15690043 Escherichia coli |
| Butland et al. (2005)     | 15690043 Escherichia coli |
| Butland et al. (2005)     | 15690043 Escherichia coli |
| Butland et al. (2005)     | 15690043 Escherichia coli |
| Arifuzzaman et al. (2006) | 16606699 Escherichia coli |
| Arifuzzaman et al. (2006) | 16606699 Escherichia coli |
| Arifuzzaman et al. (2006) | 16606699 Escherichia coli |
| Butland et al. (2005)     | 15690043 Escherichia coli |
| Butland et al. (2005)     | 15690043 Escherichia coli |
| Butland et al. (2005)     | 15690043 Escherichia coli |
| Butland et al. (2005)     | 15690043 Escherichia coli |
| Butland et al. (2005)     | 15690043 Escherichia coli |
| Butland et al. (2005)     | 15690043 Escherichia coli |
| Arifuzzaman et al. (2006) | 16606699 Escherichia coli |
| Arifuzzaman et al. (2006) | 16606699 Escherichia coli |
| Arifuzzaman et al. (2006) | 16606699 Escherichia coli |
| Butland et al. (2005)     | 15690043 Escherichia coli |
| Arifuzzaman et al. (2006) | 16606699 Escherichia coli |
| Arifuzzaman et al. (2006) | 16606699 Escherichia coli |
| Arifuzzaman et al. (2006) | 16606699 Escherichia coli |
| Arifuzzaman et al. (2006) | 16606699 Escherichia coli |
| Arifuzzaman et al. (2006) | 16606699 Escherichia coli |

|                           |          |                  |
|---------------------------|----------|------------------|
| Butland et al. (2006)     | 16412426 | Escherichia coli |
| Arifuzzaman et al. (2006) | 16606699 | Escherichia coli |
| Lasserre et al. (2006)    | 16858726 | Escherichia coli |
| Arifuzzaman et al. (2006) | 16606699 | Escherichia coli |
| Arifuzzaman et al. (2006) | 16606699 | Escherichia coli |
| Arifuzzaman et al. (2006) | 16606699 | Escherichia coli |

|                               |               |                  |
|-------------------------------|---------------|------------------|
| Koike-Takeshita et al. (2006) | imex:IM-14417 | Escherichia coli |
| Butland et al. (2005)         | 15690043      | Escherichia coli |
| Arifuzzaman et al. (2006)     | 16606699      | Escherichia coli |

|                           |          |                  |
|---------------------------|----------|------------------|
| Arifuzzaman et al. (2006) | 16606699 | Escherichia coli |
| Stenberg et al. (2005)    | 16079137 | Escherichia coli |
| Stenberg et al. (2005)    | 16079137 | Escherichia coli |

|                           |          |                  |
|---------------------------|----------|------------------|
| Butland et al. (2005)     | 15690043 | Escherichia coli |
| Arifuzzaman et al. (2006) | 16606699 | Escherichia coli |

|                           |          |                  |
|---------------------------|----------|------------------|
| Arifuzzaman et al. (2006) | 16606699 | Escherichia coli |
| Arifuzzaman et al. (2006) | 16606699 | Escherichia coli |

|                           |          |                  |
|---------------------------|----------|------------------|
| Arifuzzaman et al. (2006) | 16606699 | Escherichia coli |
| Arifuzzaman et al. (2006) | 16606699 | Escherichia coli |
| Butland et al. (2005)     | 15690043 | Escherichia coli |
| Butland et al. (2005)     | 15690043 | Escherichia coli |
| Arifuzzaman et al. (2006) | 16606699 | Escherichia coli |
| Arifuzzaman et al. (2006) | 16606699 | Escherichia coli |
| Butland et al. (2005)     | 15690043 | Escherichia coli |

|                           |          |                  |
|---------------------------|----------|------------------|
| Arifuzzaman et al. (2006) | 16606699 | Escherichia coli |
| Arifuzzaman et al. (2006) | 16606699 | Escherichia coli |
| Arifuzzaman et al. (2006) | 16606699 | Escherichia coli |
| Arifuzzaman et al. (2006) | 16606699 | Escherichia coli |
| Arifuzzaman et al. (2006) | 16606699 | Escherichia coli |
| Arifuzzaman et al. (2006) | 16606699 | Escherichia coli |
| Arifuzzaman et al. (2006) | 16606699 | Escherichia coli |
| Arifuzzaman et al. (2006) | 16606699 | Escherichia coli |
| Arifuzzaman et al. (2006) | 16606699 | Escherichia coli |

|                          |          |                  |
|--------------------------|----------|------------------|
| Butland et al. (2005)    | 15690043 | Escherichia coli |
| Rajagopala et al. (2009) | 19834901 | Escherichia coli |



|                           |               |                  |
|---------------------------|---------------|------------------|
| Butland et al. (2005)     | 15690043      | Escherichia coli |
| Butland et al. (2005)     | 15690043      | Escherichia coli |
| Butland et al. (2005)     | 15690043      | Escherichia coli |
| Butland et al. (2005)     | 15690043      | Escherichia coli |
| Butland et al. (2005)     | 15690043      | Escherichia coli |
| Butland et al. (2005)     | 15690043      | Escherichia coli |
| Butland et al. (2005)     | 15690043      | Escherichia coli |
| Butland et al. (2005)     | 15690043      | Escherichia coli |
| Butland et al. (2005)     | 15690043      | Escherichia coli |
| Butland et al. (2005)     | 15690043      | Escherichia coli |
| Butland et al. (2005)     | 15690043      | Escherichia coli |
| Butland et al. (2005)     | 15690043      | Escherichia coli |
| Butland et al. (2005)     | 15690043      | Escherichia coli |
| Butland et al. (2005)     | 15690043      | Escherichia coli |
| Butland et al. (2005)     | 15690043      | Escherichia coli |
| Butland et al. (2005)     | 15690043      | Escherichia coli |
| Huang et al. (2006)       | 17137328      | Escherichia coli |
| Huang et al. (2006)       | 17137328      | Escherichia coli |
| Arifuzzaman et al. (2006) | 16606699      | Escherichia coli |
| Deaconescu et al. (2006)  | imex:IM-11831 | Escherichia coli |
| Deaconescu et al. (2006)  | imex:IM-11831 | Escherichia coli |
| Arifuzzaman et al. (2006) | 16606699      | Escherichia coli |
| Butland et al. (2005)     | 15690043      | Escherichia coli |
| Arifuzzaman et al. (2006) | 16606699      | Escherichia coli |
| Arifuzzaman et al. (2006) | 16606699      | Escherichia coli |
| Butland et al. (2005)     | 15690043      | Escherichia coli |
| Butland et al. (2005)     | 15690043      | Escherichia coli |
| Arifuzzaman et al. (2006) | 16606699      | Escherichia coli |
| Butland et al. (2005)     | 15690043      | Escherichia coli |
| Arifuzzaman et al. (2006) | 16606699      | Escherichia coli |
| Arifuzzaman et al. (2006) | 16606699      | Escherichia coli |
| Arifuzzaman et al. (2006) | 16606699      | Escherichia coli |
| Arifuzzaman et al. (2006) | 16606699      | Escherichia coli |
| Butland et al. (2005)     | 15690043      | Escherichia coli |
| Butland et al. (2005)     | 15690043      | Escherichia coli |
| Arifuzzaman et al. (2006) | 16606699      | Escherichia coli |
| Arifuzzaman et al. (2006) | 16606699      | Escherichia coli |

|                           |                           |
|---------------------------|---------------------------|
| Arifuzzaman et al. (2006) | 16606699 Escherichia coli |
| Arifuzzaman et al. (2006) | 16606699 Escherichia coli |
| Arifuzzaman et al. (2006) | 16606699 Escherichia coli |

|                           |                           |
|---------------------------|---------------------------|
| Arifuzzaman et al. (2006) | 16606699 Escherichia coli |
| Arifuzzaman et al. (2006) | 16606699 Escherichia coli |
| Arifuzzaman et al. (2006) | 16606699 Escherichia coli |
| Arifuzzaman et al. (2006) | 16606699 Escherichia coli |
| Arifuzzaman et al. (2006) | 16606699 Escherichia coli |
| Arifuzzaman et al. (2006) | 16606699 Escherichia coli |
| Arifuzzaman et al. (2006) | 16606699 Escherichia coli |
| Arifuzzaman et al. (2006) | 16606699 Escherichia coli |
| Arifuzzaman et al. (2006) | 16606699 Escherichia coli |
| Arifuzzaman et al. (2006) | 16606699 Escherichia coli |

|                           |                           |
|---------------------------|---------------------------|
| Arifuzzaman et al. (2006) | 16606699 Escherichia coli |
| Arifuzzaman et al. (2006) | 16606699 Escherichia coli |

|                           |                           |
|---------------------------|---------------------------|
| Lasserre et al. (2006)    | 16858726 Escherichia coli |
| Arifuzzaman et al. (2006) | 16606699 Escherichia coli |

|                           |                           |
|---------------------------|---------------------------|
| Arifuzzaman et al. (2006) | 16606699 Escherichia coli |
| Magalon et al. (2002)     | 12372836 Escherichia coli |
| Magalon et al. (2002)     | 12372836 Escherichia coli |
| Magalon et al. (2002)     | 12372836 Escherichia coli |
| Magalon et al. (2002)     | 12372836 Escherichia coli |
| Arifuzzaman et al. (2006) | 16606699 Escherichia coli |

|                           |                           |
|---------------------------|---------------------------|
| Arifuzzaman et al. (2006) | 16606699 Escherichia coli |
| Magalon et al. (2002)     | 12372836 Escherichia coli |
| Magalon et al. (2002)     | 12372836 Escherichia coli |

|                           |                                 |
|---------------------------|---------------------------------|
| Arifuzzaman et al. (2006) | 16606699 Escherichia coli       |
| Arifuzzaman et al. (2006) | 16606699 Escherichia coli       |
| Arifuzzaman et al. (2006) | 16606699 Escherichia coli       |
| Arifuzzaman et al. (2006) | 16606699 Escherichia coli       |
| Arifuzzaman et al. (2006) | 16606699 Escherichia coli       |
| Arifuzzaman et al. (2006) | 16606699 Escherichia coli       |
| Arifuzzaman et al. (2006) | 16606699 Escherichia coli       |
| <br>                      |                                 |
| Arifuzzaman et al. (2006) | 16606699 Escherichia coli       |
| Arifuzzaman et al. (2006) | 16606699 Escherichia coli       |
| Arifuzzaman et al. (2006) | 16606699 Escherichia coli       |
| Butland et al. (2005)     | 15690043 Escherichia coli       |
| <br>                      |                                 |
| Arifuzzaman et al. (2006) | 16606699 Escherichia coli       |
| <br>                      |                                 |
| Rajagopala et al. (2009)  | 19834901 Escherichia coli       |
| Butland et al. (2005)     | 15690043 Escherichia coli       |
| Butland et al. (2005)     | 15690043 Escherichia coli       |
| <br>                      |                                 |
| Butland et al. (2005)     | 15690043 Escherichia coli       |
| Arifuzzaman et al. (2006) | 16606699 Escherichia coli       |
| Butland et al. (2005)     | 15690043 Escherichia coli       |
| Butland et al. (2005)     | 15690043 Escherichia coli       |
| Butland et al. (2005)     | 15690043 Escherichia coli       |
| Butland et al. (2005)     | 15690043 Escherichia coli       |
| Butland et al. (2005)     | 15690043 Escherichia coli       |
| Arifuzzaman et al. (2006) | 16606699 Escherichia coli       |
| Arifuzzaman et al. (2006) | 16606699 Escherichia coli       |
| Butland et al. (2005)     | 15690043 Escherichia coli       |
| Butland et al. (2005)     | 15690043 Escherichia coli       |
| Arifuzzaman et al. (2006) | 16606699 Escherichia coli       |
| Arifuzzaman et al. (2006) | 16606699 Escherichia coli       |
| Butland et al. (2005)     | 15690043 Escherichia coli       |
| Butland et al. (2005)     | 15690043 Escherichia coli       |
| Butland et al. (2005)     | 15690043 Escherichia coli       |
| Butland et al. (2005)     | 15690043 Escherichia coli       |
| Butland et al. (2005)     | 15690043 Escherichia coli       |
| Butland et al. (2005)     | 15690043 Escherichia coli       |
| Arifuzzaman et al. (2006) | 16606699 Escherichia coli       |
| Price et al. (2010)       | 20706981 Escherichia coli O9:H4 |
| Butland et al. (2005)     | 15690043 Escherichia coli       |































|                           |                           |
|---------------------------|---------------------------|
| Arifuzzaman et al. (2006) | 16606699 Escherichia coli |
| Butland et al. (2005)     | 15690043 Escherichia coli |
| Butland et al. (2005)     | 15690043 Escherichia coli |
| Arifuzzaman et al. (2006) | 16606699 Escherichia coli |
| Arifuzzaman et al. (2006) | 16606699 Escherichia coli |
| Arifuzzaman et al. (2006) | 16606699 Escherichia coli |
| Arifuzzaman et al. (2006) | 16606699 Escherichia coli |
| Arifuzzaman et al. (2006) | 16606699 Escherichia coli |
| Arifuzzaman et al. (2006) | 16606699 Escherichia coli |
| Arifuzzaman et al. (2006) | 16606699 Escherichia coli |
| Arifuzzaman et al. (2006) | 16606699 Escherichia coli |
| Arifuzzaman et al. (2006) | 16606699 Escherichia coli |
| Arifuzzaman et al. (2006) | 16606699 Escherichia coli |
| Arifuzzaman et al. (2006) | 16606699 Escherichia coli |
| Arifuzzaman et al. (2006) | 16606699 Escherichia coli |
| Arifuzzaman et al. (2006) | 16606699 Escherichia coli |
| Rajagopala et al. (2009)  | 19834901 Escherichia coli |
| Arifuzzaman et al. (2006) | 16606699 Escherichia coli |
| Rajagopala et al. (2009)  | 19834901 Escherichia coli |
| Rajagopala et al. (2009)  | 19834901 Escherichia coli |
| Butland et al. (2005)     | 15690043 Escherichia coli |
| Arifuzzaman et al. (2006) | 16606699 Escherichia coli |
| Arifuzzaman et al. (2006) | 16606699 Escherichia coli |
| Salinas et al. (2003)     | 12838411 Escherichia coli |
| Salinas et al. (2003)     | 12838411 Escherichia coli |
| Salinas et al. (2003)     | 12838411 Escherichia coli |
| Arifuzzaman et al. (2006) | 16606699 Escherichia coli |













Butland et al. (2005) 15690043 Escherichia coli  
Butland et al. (2005) 15690043 Escherichia coli

Arifuzzaman et al. (2006) 16606699 Escherichia coli  
Butland et al. (2005) 15690043 Escherichia coli  
Butland et al. (2005) 15690043 Escherichia coli  
Stenberg et al. (2005) 16079137 Escherichia coli  
Butland et al. (2005) 15690043 Escherichia coli  
Kumar et al. (2004) 15004283 Escherichia coli  
Arifuzzaman et al. (2006) 16606699 Escherichia coli  
Martinez-Hackert et al. (2009) imex:IM-12086 Escherichia coli  
Arifuzzaman et al. (2006) 16606699 Escherichia coli  
Butland et al. (2005) 15690043 Escherichia coli  
Butland et al. (2005) 15690043 Escherichia coli

Butland et al. (2005) 15690043 Escherichia coli  
Butland et al. (2005) 15690043 Escherichia coli  
Butland et al. (2005) 15690043 Escherichia coli  
Kumar et al. (2004) 15004283 Escherichia coli  
Butland et al. (2005) 15690043 Escherichia coli

Arifuzzaman et al. (2006) 16606699 Escherichia coli  
Arifuzzaman et al. (2006) 16606699 Escherichia coli  
Kumar et al. (2004) 15004283 Escherichia coli  
Arifuzzaman et al. (2006) 16606699 Escherichia coli

Butland et al. (2005) 15690043 Escherichia coli

Arifuzzaman et al. (2006) 16606699 Escherichia coli  
Martinez-Hackert et al. (2009) imex:IM-12086 Escherichia coli

Arifuzzaman et al. (2006) 16606699 Escherichia coli



|                           |              |                  |
|---------------------------|--------------|------------------|
| Arifuzzaman et al. (2006) | 16606699     | Escherichia coli |
| Butland et al. (2005)     | 15690043     | Escherichia coli |
| Arifuzzaman et al. (2006) | 16606699     | Escherichia coli |
| Arifuzzaman et al. (2006) | 16606699     | Escherichia coli |
| Butland et al. (2005)     | 15690043     | Escherichia coli |
| Butland et al. (2005)     | 15690043     | Escherichia coli |
| Butland et al. (2005)     | 15690043     | Escherichia coli |
| Butland et al. (2005)     | 15690043     | Escherichia coli |
| Butland et al. (2005)     | 15690043     | Escherichia coli |
| Muller et al. (2007)      | 17938168     | Escherichia coli |
| Muller et al. (2007)      | 17938168     | Escherichia coli |
| Muller et al. (2007)      | 17938168     | Escherichia coli |
| Arifuzzaman et al. (2006) | 16606699     | Escherichia coli |
| Arifuzzaman et al. (2006) | 16606699     | Escherichia coli |
| Pan et al.                | imex:IM-9154 | Escherichia coli |
| Arifuzzaman et al. (2006) | 16606699     | Escherichia coli |
| Arifuzzaman et al. (2006) | 16606699     | Escherichia coli |
| Arifuzzaman et al. (2006) | 16606699     | Escherichia coli |
| Butland et al. (2005)     | 15690043     | Escherichia coli |
| Arifuzzaman et al. (2006) | 16606699     | Escherichia coli |
| Butland et al. (2005)     | 15690043     | Escherichia coli |
| Butland et al. (2005)     | 15690043     | Escherichia coli |
| Butland et al. (2005)     | 15690043     | Escherichia coli |
| Butland et al. (2005)     | 15690043     | Escherichia coli |
| Butland et al. (2005)     | 15690043     | Escherichia coli |
| Butland et al. (2005)     | 15690043     | Escherichia coli |
| Butland et al. (2005)     | 15690043     | Escherichia coli |
| Arifuzzaman et al. (2006) | 16606699     | Escherichia coli |
| Butland et al. (2005)     | 15690043     | Escherichia coli |
| Butland et al. (2005)     | 15690043     | Escherichia coli |





|                           |              |                  |
|---------------------------|--------------|------------------|
| Arifuzzaman et al. (2006) | 16606699     | Escherichia coli |
| Arifuzzaman et al. (2006) | 16606699     | Escherichia coli |
| Butland et al. (2005)     | 15690043     | Escherichia coli |
| Arifuzzaman et al. (2006) | 16606699     | Escherichia coli |
| Arifuzzaman et al. (2006) | 16606699     | Escherichia coli |
| Arifuzzaman et al. (2006) | 16606699     | Escherichia coli |
| Arifuzzaman et al. (2006) | 16606699     | Escherichia coli |
| Butland et al. (2005)     | 15690043     | Escherichia coli |
| Butland et al. (2005)     | 15690043     | Escherichia coli |
| Arifuzzaman et al. (2006) | 16606699     | Escherichia coli |
| Butland et al. (2005)     | 15690043     | Escherichia coli |
| Arifuzzaman et al. (2006) | 16606699     | Escherichia coli |
| Butland et al. (2005)     | 15690043     | Escherichia coli |
| Butland et al. (2005)     | 15690043     | Escherichia coli |
| Arifuzzaman et al. (2006) | 16606699     | Escherichia coli |
| Arifuzzaman et al. (2006) | 16606699     | Escherichia coli |
| Arifuzzaman et al. (2006) | 16606699     | Escherichia coli |
| Arifuzzaman et al. (2006) | 16606699     | Escherichia coli |
| Butland et al. (2005)     | 15690043     | Escherichia coli |
| Butland et al. (2005)     | 15690043     | Escherichia coli |
| Butland et al. (2005)     | 15690043     | Escherichia coli |
| Arifuzzaman et al. (2006) | 16606699     | Escherichia coli |
| Butland et al. (2005)     | 15690043     | Escherichia coli |
| Butland et al. (2005)     | 15690043     | Escherichia coli |
| Arifuzzaman et al. (2006) | 16606699     | Escherichia coli |
| Arifuzzaman et al. (2006) | 16606699     | Escherichia coli |
| Arifuzzaman et al. (2006) | 16606699     | Escherichia coli |
| Arifuzzaman et al. (2006) | 16606699     | Escherichia coli |
| Arifuzzaman et al. (2006) | 16606699     | Escherichia coli |
| Arifuzzaman et al. (2006) | 16606699     | Escherichia coli |
| Arifuzzaman et al. (2006) | 16606699     | Escherichia coli |
| Arifuzzaman et al. (2006) | 16606699     | Escherichia coli |
| Butland et al. (2005)     | 15690043     | Escherichia coli |
| Arifuzzaman et al. (2006) | 16606699     | Escherichia coli |
| Pan et al.                | imex:IM-9154 | Escherichia coli |
| Butland et al. (2005)     | 15690043     | Escherichia coli |
| Butland et al. (2005)     | 15690043     | Escherichia coli |

|                           |                           |
|---------------------------|---------------------------|
| Arifuzzaman et al. (2006) | 16606699 Escherichia coli |
| Butland et al. (2005)     | 15690043 Escherichia coli |
| Lasserre et al. (2006)    | 16858726 Escherichia coli |
| Butland et al. (2005)     | 15690043 Escherichia coli |
| Arifuzzaman et al. (2006) | 16606699 Escherichia coli |
| Lasserre et al. (2006)    | 16858726 Escherichia coli |
| Butland et al. (2005)     | 15690043 Escherichia coli |
| Butland et al. (2005)     | 15690043 Escherichia coli |
| Arifuzzaman et al. (2006) | 16606699 Escherichia coli |
| Arifuzzaman et al. (2006) | 16606699 Escherichia coli |
| Arifuzzaman et al. (2006) | 16606699 Escherichia coli |
| Butland et al. (2005)     | 15690043 Escherichia coli |
| Butland et al. (2005)     | 15690043 Escherichia coli |
| Arifuzzaman et al. (2006) | 16606699 Escherichia coli |
| Butland et al. (2005)     | 15690043 Escherichia coli |
| Butland et al. (2005)     | 15690043 Escherichia coli |
| Butland et al. (2005)     | 15690043 Escherichia coli |
| Butland et al. (2005)     | 15690043 Escherichia coli |
| Butland et al. (2005)     | 15690043 Escherichia coli |
| Butland et al. (2005)     | 15690043 Escherichia coli |
| Butland et al. (2005)     | 15690043 Escherichia coli |
| Butland et al. (2005)     | 15690043 Escherichia coli |
| Butland et al. (2005)     | 15690043 Escherichia coli |
| Butland et al. (2005)     | 15690043 Escherichia coli |
| Butland et al. (2005)     | 15690043 Escherichia coli |
| Butland et al. (2005)     | 15690043 Escherichia coli |
| Butland et al. (2005)     | 15690043 Escherichia coli |
| Butland et al. (2005)     | 15690043 Escherichia coli |
| Butland et al. (2005)     | 15690043 Escherichia coli |
| Butland et al. (2005)     | 15690043 Escherichia coli |
| Butland et al. (2005)     | 15690043 Escherichia coli |
| Butland et al. (2005)     | 15690043 Escherichia coli |
| Butland et al. (2005)     | 15690043 Escherichia coli |
| Butland et al. (2005)     | 15690043 Escherichia coli |
| Arifuzzaman et al. (2006) | 16606699 Escherichia coli |





|                                |               |                  |
|--------------------------------|---------------|------------------|
| Garrett et al. (1997)          | 9109646       | Escherichia coli |
| Arifuzzaman et al. (2006)      | 16606699      | Escherichia coli |
| Arifuzzaman et al. (2006)      | 16606699      | Escherichia coli |
| Arifuzzaman et al. (2006)      | 16606699      | Escherichia coli |
| Butland et al. (2005)          | 15690043      | Escherichia coli |
| Butland et al. (2005)          | 15690043      | Escherichia coli |
| Arifuzzaman et al. (2006)      | 16606699      | Escherichia coli |
| Arifuzzaman et al. (2006)      | 16606699      | Escherichia coli |
| Arifuzzaman et al. (2006)      | 16606699      | Escherichia coli |
| Butland et al. (2005)          | 15690043      | Escherichia coli |
| Arifuzzaman et al. (2006)      | 16606699      | Escherichia coli |
| Butland et al. (2005)          | 15690043      | Escherichia coli |
| Arifuzzaman et al. (2006)      | 16606699      | Escherichia coli |
| Arifuzzaman et al. (2006)      | 16606699      | Escherichia coli |
| Kumar et al. (2004)            | 15004283      | Escherichia coli |
| Kumar et al. (2004)            | 15004283      | Escherichia coli |
| Wang et al. (2000)             | 11060015      | Escherichia coli |
| Butland et al. (2005)          | 15690043      | Escherichia coli |
| Butland et al. (2005)          | 15690043      | Escherichia coli |
| Martinez-Hackert et al. (2009) | imex:IM-12086 | Escherichia coli |
| Butland et al. (2005)          | 15690043      | Escherichia coli |
| Butland et al. (2005)          | 15690043      | Escherichia coli |
| Butland et al. (2005)          | 15690043      | Escherichia coli |
| Arifuzzaman et al. (2006)      | 16606699      | Escherichia coli |
| Butland et al. (2005)          | 15690043      | Escherichia coli |
| Butland et al. (2005)          | 15690043      | Escherichia coli |
| Arifuzzaman et al. (2006)      | 16606699      | Escherichia coli |
| Arifuzzaman et al. (2006)      | 16606699      | Escherichia coli |
| Arifuzzaman et al. (2006)      | 16606699      | Escherichia coli |
| Butland et al. (2005)          | 15690043      | Escherichia coli |





|                           |                           |
|---------------------------|---------------------------|
| Arifuzzaman et al. (2006) | 16606699 Escherichia coli |
| Butland et al. (2005)     | 15690043 Escherichia coli |
| Butland et al. (2005)     | 15690043 Escherichia coli |
| Arifuzzaman et al. (2006) | 16606699 Escherichia coli |
| Arifuzzaman et al. (2006) | 16606699 Escherichia coli |
| Butland et al. (2005)     | 15690043 Escherichia coli |
| Butland et al. (2005)     | 15690043 Escherichia coli |
| Arifuzzaman et al. (2006) | 16606699 Escherichia coli |
| Butland et al. (2005)     | 15690043 Escherichia coli |
| Butland et al. (2005)     | 15690043 Escherichia coli |
| Butland et al. (2005)     | 15690043 Escherichia coli |
| Butland et al. (2005)     | 15690043 Escherichia coli |
| Butland et al. (2005)     | 15690043 Escherichia coli |
| Butland et al. (2005)     | 15690043 Escherichia coli |
| Arifuzzaman et al. (2006) | 16606699 Escherichia coli |
| Arifuzzaman et al. (2006) | 16606699 Escherichia coli |
| Lasserre et al. (2006)    | 16858726 Escherichia coli |
| Butland et al. (2005)     | 15690043 Escherichia coli |
| Kumar et al. (2004)       | 15004283 Escherichia coli |
| Butland et al. (2005)     | 15690043 Escherichia coli |
| Lasserre et al. (2006)    | 16858726 Escherichia coli |
| Butland et al. (2005)     | 15690043 Escherichia coli |
| Butland et al. (2005)     | 15690043 Escherichia coli |
| Butland et al. (2005)     | 15690043 Escherichia coli |
| Kumar et al. (2004)       | 15004283 Escherichia coli |
| Kumar et al. (2004)       | 15004283 Escherichia coli |
| Lasserre et al. (2006)    | 16858726 Escherichia coli |
| Butland et al. (2005)     | 15690043 Escherichia coli |
| Butland et al. (2005)     | 15690043 Escherichia coli |
| Arifuzzaman et al. (2006) | 16606699 Escherichia coli |
| Butland et al. (2005)     | 15690043 Escherichia coli |
| Arifuzzaman et al. (2006) | 16606699 Escherichia coli |
| Arifuzzaman et al. (2006) | 16606699 Escherichia coli |

|                           |                           |
|---------------------------|---------------------------|
| Arifuzzaman et al. (2006) | 16606699 Escherichia coli |
| Butland et al. (2005)     | 15690043 Escherichia coli |
| Arifuzzaman et al. (2006) | 16606699 Escherichia coli |
| Butland et al. (2005)     | 15690043 Escherichia coli |
| Butland et al. (2005)     | 15690043 Escherichia coli |
| Arifuzzaman et al. (2006) | 16606699 Escherichia coli |
| Butland et al. (2005)     | 15690043 Escherichia coli |
| Butland et al. (2005)     | 15690043 Escherichia coli |
| Butland et al. (2005)     | 15690043 Escherichia coli |
| Butland et al. (2005)     | 15690043 Escherichia coli |
| Butland et al. (2005)     | 15690043 Escherichia coli |
| Butland et al. (2005)     | 15690043 Escherichia coli |
| Butland et al. (2005)     | 15690043 Escherichia coli |
| Butland et al. (2005)     | 15690043 Escherichia coli |
| Butland et al. (2005)     | 15690043 Escherichia coli |
| Butland et al. (2005)     | 15690043 Escherichia coli |
| Butland et al. (2005)     | 15690043 Escherichia coli |
| Butland et al. (2005)     | 15690043 Escherichia coli |
| Kumar et al. (2004)       | 15004283 Escherichia coli |
| Kumar et al. (2004)       | 15004283 Escherichia coli |
| Arifuzzaman et al. (2006) | 16606699 Escherichia coli |
| Arifuzzaman et al. (2006) | 16606699 Escherichia coli |
|                           |                           |
| Arifuzzaman et al. (2006) | 16606699 Escherichia coli |
| Arifuzzaman et al. (2006) | 16606699 Escherichia coli |

|                           |                           |
|---------------------------|---------------------------|
| Butland et al. (2005)     | 15690043 Escherichia coli |
|                           |                           |
| Arifuzzaman et al. (2006) | 16606699 Escherichia coli |
| Arifuzzaman et al. (2006) | 16606699 Escherichia coli |
| Arifuzzaman et al. (2006) | 16606699 Escherichia coli |
| Arifuzzaman et al. (2006) | 16606699 Escherichia coli |
|                           |                           |
| Arifuzzaman et al. (2006) | 16606699 Escherichia coli |
| Arifuzzaman et al. (2006) | 16606699 Escherichia coli |





|                           |                           |
|---------------------------|---------------------------|
| Butland et al. (2005)     | 15690043 Escherichia coli |
| Arifuzzaman et al. (2006) | 16606699 Escherichia coli |
| Arifuzzaman et al. (2006) | 16606699 Escherichia coli |
| Arifuzzaman et al. (2006) | 16606699 Escherichia coli |
| Arifuzzaman et al. (2006) | 16606699 Escherichia coli |
| Arifuzzaman et al. (2006) | 16606699 Escherichia coli |
| Arifuzzaman et al. (2006) | 16606699 Escherichia coli |
| Arifuzzaman et al. (2006) | 16606699 Escherichia coli |
| Arifuzzaman et al. (2006) | 16606699 Escherichia coli |
| Arifuzzaman et al. (2006) | 16606699 Escherichia coli |
| Arifuzzaman et al. (2006) | 16606699 Escherichia coli |
| Arifuzzaman et al. (2006) | 16606699 Escherichia coli |
| Arifuzzaman et al. (2006) | 16606699 Escherichia coli |
| Arifuzzaman et al. (2006) | 16606699 Escherichia coli |
| Arifuzzaman et al. (2006) | 16606699 Escherichia coli |
| Arifuzzaman et al. (2006) | 16606699 Escherichia coli |

|                           |                           |
|---------------------------|---------------------------|
| Butland et al. (2005)     | 15690043 Escherichia coli |
| Butland et al. (2005)     | 15690043 Escherichia coli |
| Huang et al. (2006)       | 17137328 Escherichia coli |
| Butland et al. (2005)     | 15690043 Escherichia coli |
| Butland et al. (2005)     | 15690043 Escherichia coli |
| Butland et al. (2005)     | 15690043 Escherichia coli |
| Butland et al. (2005)     | 15690043 Escherichia coli |
| Arifuzzaman et al. (2006) | 16606699 Escherichia coli |
| Arifuzzaman et al. (2006) | 16606699 Escherichia coli |
| Butland et al. (2005)     | 15690043 Escherichia coli |
| Butland et al. (2005)     | 15690043 Escherichia coli |
| Arifuzzaman et al. (2006) | 16606699 Escherichia coli |
| Butland et al. (2005)     | 15690043 Escherichia coli |
| Butland et al. (2005)     | 15690043 Escherichia coli |
| Butland et al. (2005)     | 15690043 Escherichia coli |
| Arifuzzaman et al. (2006) | 16606699 Escherichia coli |
| Butland et al. (2005)     | 15690043 Escherichia coli |
| Arifuzzaman et al. (2006) | 16606699 Escherichia coli |



|                                |               |                  |
|--------------------------------|---------------|------------------|
| Butland et al. (2005)          | 15690043      | Escherichia coli |
| Arifuzzaman et al. (2006)      | 16606699      | Escherichia coli |
| Butland et al. (2005)          | 15690043      | Escherichia coli |
| Butland et al. (2005)          | 15690043      | Escherichia coli |
| Arifuzzaman et al. (2006)      | 16606699      | Escherichia coli |
| Butland et al. (2005)          | 15690043      | Escherichia coli |
| Butland et al. (2005)          | 15690043      | Escherichia coli |
| Arifuzzaman et al. (2006)      | 16606699      | Escherichia coli |
| Butland et al. (2005)          | 15690043      | Escherichia coli |
| Butland et al. (2005)          | 15690043      | Escherichia coli |
| Butland et al. (2005)          | 15690043      | Escherichia coli |
| Butland et al. (2005)          | 15690043      | Escherichia coli |
| Arifuzzaman et al. (2006)      | 16606699      | Escherichia coli |
| Arifuzzaman et al. (2006)      | 16606699      | Escherichia coli |
| Butland et al. (2005)          | 15690043      | Escherichia coli |
| Regonesi et al. (2006)         | 16139413      | Escherichia coli |
| Regonesi et al. (2006)         | 16139413      | Escherichia coli |
| Regonesi et al. (2006)         | 16139413      | Escherichia coli |
| Regonesi et al. (2006)         | 16139413      | Escherichia coli |
| Regonesi et al. (2006)         | 16139413      | Escherichia coli |
| Butland et al. (2005)          | 15690043      | Escherichia coli |
| Butland et al. (2005)          | 15690043      | Escherichia coli |
| Butland et al. (2005)          | 15690043      | Escherichia coli |
| Butland et al. (2005)          | 15690043      | Escherichia coli |
| Butland et al. (2005)          | 15690043      | Escherichia coli |
| Butland et al. (2005)          | 15690043      | Escherichia coli |
| Butland et al. (2005)          | 15690043      | Escherichia coli |
| Butland et al. (2005)          | 15690043      | Escherichia coli |
| Butland et al. (2005)          | 15690043      | Escherichia coli |
| Butland et al. (2005)          | 15690043      | Escherichia coli |
| Arifuzzaman et al. (2006)      | 16606699      | Escherichia coli |
| Arifuzzaman et al. (2006)      | 16606699      | Escherichia coli |
| Butland et al. (2005)          | 15690043      | Escherichia coli |
| Butland et al. (2005)          | 15690043      | Escherichia coli |
| Butland et al. (2005)          | 15690043      | Escherichia coli |
| Arifuzzaman et al. (2006)      | 16606699      | Escherichia coli |
| Butland et al. (2005)          | 15690043      | Escherichia coli |
| Butland et al. (2005)          | 15690043      | Escherichia coli |
| Butland et al. (2005)          | 15690043      | Escherichia coli |
| Butland et al. (2005)          | 15690043      | Escherichia coli |
| Arifuzzaman et al. (2006)      | 16606699      | Escherichia coli |
| Martinez-Hackert et al. (2009) | imex:IM-12086 | Escherichia coli |
| Arifuzzaman et al. (2006)      | 16606699      | Escherichia coli |
| Arifuzzaman et al. (2006)      | 16606699      | Escherichia coli |
| Butland et al. (2005)          | 15690043      | Escherichia coli |





































































|                                |               |                  |
|--------------------------------|---------------|------------------|
| Butland et al. (2005)          | 15690043      | Escherichia coli |
| Butland et al. (2005)          | 15690043      | Escherichia coli |
| Arifuzzaman et al. (2006)      | 16606699      | Escherichia coli |
| Arifuzzaman et al. (2006)      | 16606699      | Escherichia coli |
| Butland et al. (2005)          | 15690043      | Escherichia coli |
| Butland et al. (2005)          | 15690043      | Escherichia coli |
| Butland et al. (2005)          | 15690043      | Escherichia coli |
| Butland et al. (2005)          | 15690043      | Escherichia coli |
| Arifuzzaman et al. (2006)      | 16606699      | Escherichia coli |
| Butland et al. (2005)          | 15690043      | Escherichia coli |
| Butland et al. (2005)          | 15690043      | Escherichia coli |
| Butland et al. (2005)          | 15690043      | Escherichia coli |
| Butland et al. (2005)          | 15690043      | Escherichia coli |
| Arifuzzaman et al. (2006)      | 16606699      | Escherichia coli |
| Butland et al. (2005)          | 15690043      | Escherichia coli |
| Butland et al. (2005)          | 15690043      | Escherichia coli |
| Butland et al. (2005)          | 15690043      | Escherichia coli |
| Regonesi et al. (2006)         | 16139413      | Escherichia coli |
| Regonesi et al. (2006)         | 16139413      | Escherichia coli |
| Butland et al. (2005)          | 15690043      | Escherichia coli |
| Butland et al. (2005)          | 15690043      | Escherichia coli |
| Butland et al. (2005)          | 15690043      | Escherichia coli |
| Butland et al. (2005)          | 15690043      | Escherichia coli |
| Arifuzzaman et al. (2006)      | 16606699      | Escherichia coli |
| Butland et al. (2005)          | 15690043      | Escherichia coli |
| Butland et al. (2005)          | 15690043      | Escherichia coli |
| Butland et al. (2005)          | 15690043      | Escherichia coli |
| Butland et al. (2005)          | 15690043      | Escherichia coli |
| Butland et al. (2005)          | 15690043      | Escherichia coli |
| Arifuzzaman et al. (2006)      | 16606699      | Escherichia coli |
| Arifuzzaman et al. (2006)      | 16606699      | Escherichia coli |
| Butland et al. (2005)          | 15690043      | Escherichia coli |
| Martinez-Hackert et al. (2009) | imex:IM-12086 | Escherichia coli |
| Arifuzzaman et al. (2006)      | 16606699      | Escherichia coli |
| Butland et al. (2005)          | 15690043      | Escherichia coli |
| Butland et al. (2005)          | 15690043      | Escherichia coli |
| Butland et al. (2005)          | 15690043      | Escherichia coli |
| Arifuzzaman et al. (2006)      | 16606699      | Escherichia coli |
| Butland et al. (2005)          | 15690043      | Escherichia coli |
| Butland et al. (2005)          | 15690043      | Escherichia coli |
| Arifuzzaman et al. (2006)      | 16606699      | Escherichia coli |
| Butland et al. (2005)          | 15690043      | Escherichia coli |
| Arifuzzaman et al. (2006)      | 16606699      | Escherichia coli |
| Butland et al. (2005)          | 15690043      | Escherichia coli |











































|                       |                           |
|-----------------------|---------------------------|
| Butland et al. (2005) | 15690043 Escherichia coli |
| Butland et al. (2005) | 15690043 Escherichia coli |
| Butland et al. (2005) | 15690043 Escherichia coli |
| Butland et al. (2005) | 15690043 Escherichia coli |
| Butland et al. (2005) | 15690043 Escherichia coli |
| Butland et al. (2005) | 15690043 Escherichia coli |

|                           |                           |
|---------------------------|---------------------------|
| Butland et al. (2005)     | 15690043 Escherichia coli |
| Butland et al. (2005)     | 15690043 Escherichia coli |
| Butland et al. (2005)     | 15690043 Escherichia coli |
| Arifuzzaman et al. (2006) | 16606699 Escherichia coli |
| Arifuzzaman et al. (2006) | 16606699 Escherichia coli |
| Butland et al. (2005)     | 15690043 Escherichia coli |
| Butland et al. (2005)     | 15690043 Escherichia coli |
| Arifuzzaman et al. (2006) | 16606699 Escherichia coli |
| Butland et al. (2005)     | 15690043 Escherichia coli |
| Butland et al. (2005)     | 15690043 Escherichia coli |
| Butland et al. (2005)     | 15690043 Escherichia coli |

|                           |                           |
|---------------------------|---------------------------|
| Arifuzzaman et al. (2006) | 16606699 Escherichia coli |
| Arifuzzaman et al. (2006) | 16606699 Escherichia coli |
| Arifuzzaman et al. (2006) | 16606699 Escherichia coli |

|                       |                           |
|-----------------------|---------------------------|
| Butland et al. (2005) | 15690043 Escherichia coli |
|-----------------------|---------------------------|

|                           |                           |
|---------------------------|---------------------------|
| Arifuzzaman et al. (2006) | 16606699 Escherichia coli |
| Butland et al. (2005)     | 15690043 Escherichia coli |
| Arifuzzaman et al. (2006) | 16606699 Escherichia coli |

|                         |                           |
|-------------------------|---------------------------|
| Regonesi et al. (2006)  | 16139413 Escherichia coli |
| Butland et al. (2005)   | 15690043 Escherichia coli |
| Butland et al. (2005)   | 15690043 Escherichia coli |
| Callaghan et al. (2004) | 15236960 Escherichia coli |
| Callaghan et al. (2004) | 15236960 Escherichia coli |
| Butland et al. (2005)   | 15690043 Escherichia coli |















|                           |                           |
|---------------------------|---------------------------|
| Butland et al. (2005)     | 15690043 Escherichia coli |
| Arifuzzaman et al. (2006) | 16606699 Escherichia coli |
| Arifuzzaman et al. (2006) | 16606699 Escherichia coli |
| Arifuzzaman et al. (2006) | 16606699 Escherichia coli |
| Arifuzzaman et al. (2006) | 16606699 Escherichia coli |
| Butland et al. (2005)     | 15690043 Escherichia coli |
| Butland et al. (2005)     | 15690043 Escherichia coli |
| Arifuzzaman et al. (2006) | 16606699 Escherichia coli |
| Butland et al. (2005)     | 15690043 Escherichia coli |
| Arifuzzaman et al. (2006) | 16606699 Escherichia coli |
| Butland et al. (2005)     | 15690043 Escherichia coli |
| Arifuzzaman et al. (2006) | 16606699 Escherichia coli |
| Arifuzzaman et al. (2006) | 16606699 Escherichia coli |
| Arifuzzaman et al. (2006) | 16606699 Escherichia coli |
| Butland et al. (2005)     | 15690043 Escherichia coli |

|                           |                           |
|---------------------------|---------------------------|
| Butland et al. (2005)     | 15690043 Escherichia coli |
| Butland et al. (2005)     | 15690043 Escherichia coli |
| Butland et al. (2005)     | 15690043 Escherichia coli |
| Butland et al. (2005)     | 15690043 Escherichia coli |
| Butland et al. (2005)     | 15690043 Escherichia coli |
| Butland et al. (2005)     | 15690043 Escherichia coli |
| Arifuzzaman et al. (2006) | 16606699 Escherichia coli |
| Butland et al. (2005)     | 15690043 Escherichia coli |
| Butland et al. (2005)     | 15690043 Escherichia coli |
| Butland et al. (2005)     | 15690043 Escherichia coli |
| Butland et al. (2005)     | 15690043 Escherichia coli |
| Arthur et al. (2000)      | 10764785 Escherichia coli |
| Arthur et al. (2000)      | 10764785 Escherichia coli |
| Butland et al. (2005)     | 15690043 Escherichia coli |
| Butland et al. (2005)     | 15690043 Escherichia coli |
| Arifuzzaman et al. (2006) | 16606699 Escherichia coli |

|                           |                           |
|---------------------------|---------------------------|
| Arifuzzaman et al. (2006) | 16606699 Escherichia coli |
|---------------------------|---------------------------|

|                           |                           |
|---------------------------|---------------------------|
| Arifuzzaman et al. (2006) | 16606699 Escherichia coli |
|---------------------------|---------------------------|

|                        |                           |
|------------------------|---------------------------|
| Butland et al. (2005)  | 15690043 Escherichia coli |
| Butland et al. (2005)  | 15690043 Escherichia coli |
| Butland et al. (2005)  | 15690043 Escherichia coli |
| Lasserre et al. (2006) | 16858726 Escherichia coli |
| Butland et al. (2005)  | 15690043 Escherichia coli |
| Butland et al. (2005)  | 15690043 Escherichia coli |





















|                       |          |                  |
|-----------------------|----------|------------------|
| Butland et al. (2005) | 15690043 | Escherichia coli |
| Butland et al. (2005) | 15690043 | Escherichia coli |
| Butland et al. (2005) | 15690043 | Escherichia coli |
| Butland et al. (2005) | 15690043 | Escherichia coli |
| Butland et al. (2005) | 15690043 | Escherichia coli |
| Butland et al. (2005) | 15690043 | Escherichia coli |

|                           |          |                  |
|---------------------------|----------|------------------|
| Butland et al. (2005)     | 15690043 | Escherichia coli |
| Butland et al. (2005)     | 15690043 | Escherichia coli |
| Butland et al. (2005)     | 15690043 | Escherichia coli |
| Butland et al. (2005)     | 15690043 | Escherichia coli |
| Butland et al. (2005)     | 15690043 | Escherichia coli |
| Arifuzzaman et al. (2006) | 16606699 | Escherichia coli |
| Butland et al. (2005)     | 15690043 | Escherichia coli |
| Butland et al. (2005)     | 15690043 | Escherichia coli |
| Arifuzzaman et al. (2006) | 16606699 | Escherichia coli |
| Butland et al. (2005)     | 15690043 | Escherichia coli |
| Butland et al. (2005)     | 15690043 | Escherichia coli |
| Butland et al. (2005)     | 15690043 | Escherichia coli |
| Butland et al. (2005)     | 15690043 | Escherichia coli |
| Butland et al. (2005)     | 15690043 | Escherichia coli |
| Butland et al. (2005)     | 15690043 | Escherichia coli |
| Butland et al. (2005)     | 15690043 | Escherichia coli |
| Butland et al. (2005)     | 15690043 | Escherichia coli |
| Arifuzzaman et al. (2006) | 16606699 | Escherichia coli |
| Butland et al. (2005)     | 15690043 | Escherichia coli |

|                                |               |                  |
|--------------------------------|---------------|------------------|
| Butland et al. (2005)          | 15690043      | Escherichia coli |
| Rajagopala et al. (2009)       | 19834901      | Escherichia coli |
| Butland et al. (2005)          | 15690043      | Escherichia coli |
| Rajagopala et al. (2009)       | 19834901      | Escherichia coli |
| Butland et al. (2005)          | 15690043      | Escherichia coli |
| Butland et al. (2005)          | 15690043      | Escherichia coli |
| Arifuzzaman et al. (2006)      | 16606699      | Escherichia coli |
| Butland et al. (2005)          | 15690043      | Escherichia coli |
| Butland et al. (2005)          | 15690043      | Escherichia coli |
| Butland et al. (2005)          | 15690043      | Escherichia coli |
| Butland et al. (2005)          | 15690043      | Escherichia coli |
| Butland et al. (2005)          | 15690043      | Escherichia coli |
| Martinez-Hackert et al. (2009) | imex:IM-12086 | Escherichia coli |
| Butland et al. (2005)          | 15690043      | Escherichia coli |
| Butland et al. (2005)          | 15690043      | Escherichia coli |
| Butland et al. (2005)          | 15690043      | Escherichia coli |





























































|                           |                           |
|---------------------------|---------------------------|
| Arifuzzaman et al. (2006) | 16606699 Escherichia coli |
| Arifuzzaman et al. (2006) | 16606699 Escherichia coli |
| Butland et al. (2005)     | 15690043 Escherichia coli |
| Arifuzzaman et al. (2006) | 16606699 Escherichia coli |
| Arifuzzaman et al. (2006) | 16606699 Escherichia coli |
| Arifuzzaman et al. (2006) | 16606699 Escherichia coli |
| Arifuzzaman et al. (2006) | 16606699 Escherichia coli |
| Arifuzzaman et al. (2006) | 16606699 Escherichia coli |
| Arifuzzaman et al. (2006) | 16606699 Escherichia coli |
| Arifuzzaman et al. (2006) | 16606699 Escherichia coli |
| Arifuzzaman et al. (2006) | 16606699 Escherichia coli |
| Arifuzzaman et al. (2006) | 16606699 Escherichia coli |
| Arifuzzaman et al. (2006) | 16606699 Escherichia coli |
| Arifuzzaman et al. (2006) | 16606699 Escherichia coli |
| Arifuzzaman et al. (2006) | 16606699 Escherichia coli |
| Arifuzzaman et al. (2006) | 16606699 Escherichia coli |
| Arifuzzaman et al. (2006) | 16606699 Escherichia coli |
| Arifuzzaman et al. (2006) | 16606699 Escherichia coli |
| Arifuzzaman et al. (2006) | 16606699 Escherichia coli |
| Arifuzzaman et al. (2006) | 16606699 Escherichia coli |
| Arifuzzaman et al. (2006) | 16606699 Escherichia coli |
| Butland et al. (2005)     | 15690043 Escherichia coli |

|                           |                           |
|---------------------------|---------------------------|
| Arifuzzaman et al. (2006) | 16606699 Escherichia coli |
| Arifuzzaman et al. (2006) | 16606699 Escherichia coli |
| Arifuzzaman et al. (2006) | 16606699 Escherichia coli |
| Arifuzzaman et al. (2006) | 16606699 Escherichia coli |
| Arifuzzaman et al. (2006) | 16606699 Escherichia coli |
| Arifuzzaman et al. (2006) | 16606699 Escherichia coli |
| Arifuzzaman et al. (2006) | 16606699 Escherichia coli |
| Arifuzzaman et al. (2006) | 16606699 Escherichia coli |
| Arifuzzaman et al. (2006) | 16606699 Escherichia coli |
| Arifuzzaman et al. (2006) | 16606699 Escherichia coli |
| Butland et al. (2005)     | 15690043 Escherichia coli |
| Butland et al. (2005)     | 15690043 Escherichia coli |
| Arifuzzaman et al. (2006) | 16606699 Escherichia coli |
| Butland et al. (2005)     | 15690043 Escherichia coli |
| Arifuzzaman et al. (2006) | 16606699 Escherichia coli |
| Kumar et al. (2004)       | 15004283 Escherichia coli |
| Lasserre et al. (2006)    | 16858726 Escherichia coli |
| Gully et al. (2006)       | 16294310 Escherichia coli |
| Butland et al. (2005)     | 15690043 Escherichia coli |
| Arifuzzaman et al. (2006) | 16606699 Escherichia coli |
| Butland et al. (2005)     | 15690043 Escherichia coli |
| Arifuzzaman et al. (2006) | 16606699 Escherichia coli |
| Arifuzzaman et al. (2006) | 16606699 Escherichia coli |
| Butland et al. (2005)     | 15690043 Escherichia coli |
| Butland et al. (2005)     | 15690043 Escherichia coli |
| Butland et al. (2005)     | 15690043 Escherichia coli |
| Butland et al. (2005)     | 15690043 Escherichia coli |
| Butland et al. (2005)     | 15690043 Escherichia coli |
| Butland et al. (2005)     | 15690043 Escherichia coli |
| Butland et al. (2005)     | 15690043 Escherichia coli |
| Butland et al. (2005)     | 15690043 Escherichia coli |
| Arifuzzaman et al. (2006) | 16606699 Escherichia coli |
| Butland et al. (2005)     | 15690043 Escherichia coli |
| Arifuzzaman et al. (2006) | 16606699 Escherichia coli |
| Butland et al. (2005)     | 15690043 Escherichia coli |
| Butland et al. (2005)     | 15690043 Escherichia coli |
| Butland et al. (2005)     | 15690043 Escherichia coli |
| Butland et al. (2005)     | 15690043 Escherichia coli |
| Butland et al. (2005)     | 15690043 Escherichia coli |



|                           |                           |
|---------------------------|---------------------------|
| Butland et al. (2005)     | 15690043 Escherichia coli |
| Butland et al. (2005)     | 15690043 Escherichia coli |
| Butland et al. (2005)     | 15690043 Escherichia coli |
| Butland et al. (2005)     | 15690043 Escherichia coli |
| Butland et al. (2005)     | 15690043 Escherichia coli |
| Gelis et al. (2007)       | 18022369 Escherichia coli |
| Gelis et al. (2007)       | 18022369 Escherichia coli |
| Gelis et al. (2007)       | 18022369 Escherichia coli |
| Butland et al. (2005)     | 15690043 Escherichia coli |
| Butland et al. (2005)     | 15690043 Escherichia coli |
| Butland et al. (2005)     | 15690043 Escherichia coli |
| Butland et al. (2005)     | 15690043 Escherichia coli |
| Butland et al. (2005)     | 15690043 Escherichia coli |
| Arifuzzaman et al. (2006) | 16606699 Escherichia coli |
| Butland et al. (2005)     | 15690043 Escherichia coli |
| Butland et al. (2005)     | 15690043 Escherichia coli |
| Butland et al. (2005)     | 15690043 Escherichia coli |
| Butland et al. (2005)     | 15690043 Escherichia coli |
| Butland et al. (2005)     | 15690043 Escherichia coli |
| Gelis et al. (2007)       | 18022369 Escherichia coli |
| Butland et al. (2005)     | 15690043 Escherichia coli |
| Butland et al. (2005)     | 15690043 Escherichia coli |
| Butland et al. (2005)     | 15690043 Escherichia coli |
| Butland et al. (2005)     | 15690043 Escherichia coli |
| Butland et al. (2005)     | 15690043 Escherichia coli |
| Butland et al. (2005)     | 15690043 Escherichia coli |
| Butland et al. (2005)     | 15690043 Escherichia coli |
| Arifuzzaman et al. (2006) | 16606699 Escherichia coli |
| Butland et al. (2005)     | 15690043 Escherichia coli |
| Stenberg et al. (2005)    | 16079137 Escherichia coli |
| Butland et al. (2005)     | 15690043 Escherichia coli |
| Snyders et al. (1997)     | 9111035 Escherichia coli  |
| Arifuzzaman et al. (2006) | 16606699 Escherichia coli |
| Butland et al. (2005)     | 15690043 Escherichia coli |
| Butland et al. (2005)     | 15690043 Escherichia coli |
| Arifuzzaman et al. (2006) | 16606699 Escherichia coli |
| Butland et al. (2005)     | 15690043 Escherichia coli |
| Butland et al. (2005)     | 15690043 Escherichia coli |
| Butland et al. (2005)     | 15690043 Escherichia coli |
| Gully et al. (2006)       | 16294310 Escherichia coli |
| Gully et al. (2006)       | 16294310 Escherichia coli |
| Butland et al. (2005)     | 15690043 Escherichia coli |
| Arifuzzaman et al. (2006) | 16606699 Escherichia coli |
| Arifuzzaman et al. (2006) | 16606699 Escherichia coli |
| Butland et al. (2005)     | 15690043 Escherichia coli |

|                           |                           |
|---------------------------|---------------------------|
| Butland et al. (2005)     | 15690043 Escherichia coli |
| Arifuzzaman et al. (2006) | 16606699 Escherichia coli |
| Butland et al. (2005)     | 15690043 Escherichia coli |
| Butland et al. (2005)     | 15690043 Escherichia coli |
| Arifuzzaman et al. (2006) | 16606699 Escherichia coli |
| Arifuzzaman et al. (2006) | 16606699 Escherichia coli |
| Butland et al. (2005)     | 15690043 Escherichia coli |
| Arifuzzaman et al. (2006) | 16606699 Escherichia coli |
| Arifuzzaman et al. (2006) | 16606699 Escherichia coli |
| Arifuzzaman et al. (2006) | 16606699 Escherichia coli |
| Butland et al. (2005)     | 15690043 Escherichia coli |
| Butland et al. (2005)     | 15690043 Escherichia coli |
| Butland et al. (2005)     | 15690043 Escherichia coli |
| Butland et al. (2005)     | 15690043 Escherichia coli |
| Butland et al. (2005)     | 15690043 Escherichia coli |
| Arifuzzaman et al. (2006) | 16606699 Escherichia coli |
| Butland et al. (2005)     | 15690043 Escherichia coli |
| Arifuzzaman et al. (2006) | 16606699 Escherichia coli |
| Arifuzzaman et al. (2006) | 16606699 Escherichia coli |
| Butland et al. (2005)     | 15690043 Escherichia coli |
| Arifuzzaman et al. (2006) | 16606699 Escherichia coli |
| Butland et al. (2005)     | 15690043 Escherichia coli |
| Arifuzzaman et al. (2006) | 16606699 Escherichia coli |
| Butland et al. (2005)     | 15690043 Escherichia coli |
| Arifuzzaman et al. (2006) | 16606699 Escherichia coli |
| Arifuzzaman et al. (2006) | 16606699 Escherichia coli |
| Arifuzzaman et al. (2006) | 16606699 Escherichia coli |
| Arifuzzaman et al. (2006) | 16606699 Escherichia coli |
| Regonesi et al. (2006)    | 16139413 Escherichia coli |
| Regonesi et al. (2006)    | 16139413 Escherichia coli |
| Regonesi et al. (2006)    | 16139413 Escherichia coli |
| Regonesi et al. (2006)    | 16139413 Escherichia coli |
| Regonesi et al. (2006)    | 16139413 Escherichia coli |
| Arifuzzaman et al. (2006) | 16606699 Escherichia coli |
| Butland et al. (2005)     | 15690043 Escherichia coli |
| Butland et al. (2005)     | 15690043 Escherichia coli |

|                           |                           |
|---------------------------|---------------------------|
| Butland et al. (2005)     | 15690043 Escherichia coli |
| Arifuzzaman et al. (2006) | 16606699 Escherichia coli |
| Butland et al. (2005)     | 15690043 Escherichia coli |
| Butland et al. (2005)     | 15690043 Escherichia coli |
| Arifuzzaman et al. (2006) | 16606699 Escherichia coli |
| Arifuzzaman et al. (2006) | 16606699 Escherichia coli |
| Arifuzzaman et al. (2006) | 16606699 Escherichia coli |
| Butland et al. (2005)     | 15690043 Escherichia coli |
| Butland et al. (2005)     | 15690043 Escherichia coli |
| Butland et al. (2005)     | 15690043 Escherichia coli |
| Arifuzzaman et al. (2006) | 16606699 Escherichia coli |
| Arifuzzaman et al. (2006) | 16606699 Escherichia coli |
| Arifuzzaman et al. (2006) | 16606699 Escherichia coli |
| Arifuzzaman et al. (2006) | 16606699 Escherichia coli |

|                        |                           |
|------------------------|---------------------------|
| Huang et al. (2006)    | 17137328 Escherichia coli |
| Lasserre et al. (2006) | 16858726 Escherichia coli |
| Huang et al. (2006)    | 17137328 Escherichia coli |
| Stenberg et al. (2005) | 16079137 Escherichia coli |

|                           |                           |
|---------------------------|---------------------------|
| Arifuzzaman et al. (2006) | 16606699 Escherichia coli |
| Arifuzzaman et al. (2006) | 16606699 Escherichia coli |
| Arifuzzaman et al. (2006) | 16606699 Escherichia coli |

|                           |                           |
|---------------------------|---------------------------|
| Arifuzzaman et al. (2006) | 16606699 Escherichia coli |
| Arifuzzaman et al. (2006) | 16606699 Escherichia coli |
| Arifuzzaman et al. (2006) | 16606699 Escherichia coli |
| Butland et al. (2005)     | 15690043 Escherichia coli |
| Arifuzzaman et al. (2006) | 16606699 Escherichia coli |
| Arifuzzaman et al. (2006) | 16606699 Escherichia coli |
| Arifuzzaman et al. (2006) | 16606699 Escherichia coli |
| Arifuzzaman et al. (2006) | 16606699 Escherichia coli |
| Butland et al. (2005)     | 15690043 Escherichia coli |
| Butland et al. (2005)     | 15690043 Escherichia coli |
| Arifuzzaman et al. (2006) | 16606699 Escherichia coli |
| Butland et al. (2005)     | 15690043 Escherichia coli |
| Arifuzzaman et al. (2006) | 16606699 Escherichia coli |
| Arifuzzaman et al. (2006) | 16606699 Escherichia coli |
| Arifuzzaman et al. (2006) | 16606699 Escherichia coli |
| Butland et al. (2005)     | 15690043 Escherichia coli |
| Arifuzzaman et al. (2006) | 16606699 Escherichia coli |



















|                           |          |                  |
|---------------------------|----------|------------------|
| Arifuzzaman et al. (2006) | 16606699 | Escherichia coli |
| Arifuzzaman et al. (2006) | 16606699 | Escherichia coli |
| Arifuzzaman et al. (2006) | 16606699 | Escherichia coli |
| Arifuzzaman et al. (2006) | 16606699 | Escherichia coli |
| Arifuzzaman et al. (2006) | 16606699 | Escherichia coli |
| Arifuzzaman et al. (2006) | 16606699 | Escherichia coli |
| Arifuzzaman et al. (2006) | 16606699 | Escherichia coli |
| Arifuzzaman et al. (2006) | 16606699 | Escherichia coli |
| Arifuzzaman et al. (2006) | 16606699 | Escherichia coli |

|                           |              |                  |
|---------------------------|--------------|------------------|
| Butland et al. (2005)     | 15690043     | Escherichia coli |
| Pan et al.                | imex:IM-9154 | Escherichia coli |
| Arifuzzaman et al. (2006) | 16606699     | Escherichia coli |
| Butland et al. (2005)     | 15690043     | Escherichia coli |

|                           |          |                  |
|---------------------------|----------|------------------|
| Arifuzzaman et al. (2006) | 16606699 | Escherichia coli |
|---------------------------|----------|------------------|

|                           |          |                  |
|---------------------------|----------|------------------|
| Arifuzzaman et al. (2006) | 16606699 | Escherichia coli |
| Arifuzzaman et al. (2006) | 16606699 | Escherichia coli |
| Arifuzzaman et al. (2006) | 16606699 | Escherichia coli |
| Arifuzzaman et al. (2006) | 16606699 | Escherichia coli |
| Arifuzzaman et al. (2006) | 16606699 | Escherichia coli |
| Arifuzzaman et al. (2006) | 16606699 | Escherichia coli |
| Arifuzzaman et al. (2006) | 16606699 | Escherichia coli |
| Arifuzzaman et al. (2006) | 16606699 | Escherichia coli |

|                           |          |                  |
|---------------------------|----------|------------------|
| Arifuzzaman et al. (2006) | 16606699 | Escherichia coli |
| Arifuzzaman et al. (2006) | 16606699 | Escherichia coli |
| Arifuzzaman et al. (2006) | 16606699 | Escherichia coli |
| Kumar et al. (2004)       | 15004283 | Escherichia coli |

|                           |          |                  |
|---------------------------|----------|------------------|
| Arifuzzaman et al. (2006) | 16606699 | Escherichia coli |
| Arifuzzaman et al. (2006) | 16606699 | Escherichia coli |
| Arifuzzaman et al. (2006) | 16606699 | Escherichia coli |

|                           |          |                  |
|---------------------------|----------|------------------|
| Butland et al. (2005)     | 15690043 | Escherichia coli |
| Arifuzzaman et al. (2006) | 16606699 | Escherichia coli |
| Arifuzzaman et al. (2006) | 16606699 | Escherichia coli |

|                           |          |                  |
|---------------------------|----------|------------------|
| Arifuzzaman et al. (2006) | 16606699 | Escherichia coli |
| Butland et al. (2005)     | 15690043 | Escherichia coli |
| Butland et al. (2005)     | 15690043 | Escherichia coli |
| Butland et al. (2005)     | 15690043 | Escherichia coli |
| Butland et al. (2005)     | 15690043 | Escherichia coli |

|                                |               |                  |
|--------------------------------|---------------|------------------|
| Martinez-Hackert et al. (2009) | imex:IM-12086 | Escherichia coli |
| Arifuzzaman et al. (2006)      | 16606699      | Escherichia coli |

|                           |          |                  |
|---------------------------|----------|------------------|
| Arifuzzaman et al. (2006) | 16606699 | Escherichia coli |
| Arifuzzaman et al. (2006) | 16606699 | Escherichia coli |
| Arifuzzaman et al. (2006) | 16606699 | Escherichia coli |
| Arifuzzaman et al. (2006) | 16606699 | Escherichia coli |
| Arifuzzaman et al. (2006) | 16606699 | Escherichia coli |
| Arifuzzaman et al. (2006) | 16606699 | Escherichia coli |
| Arifuzzaman et al. (2006) | 16606699 | Escherichia coli |
| Arifuzzaman et al. (2006) | 16606699 | Escherichia coli |
| Arifuzzaman et al. (2006) | 16606699 | Escherichia coli |

|                       |          |                  |
|-----------------------|----------|------------------|
| Butland et al. (2005) | 15690043 | Escherichia coli |
|-----------------------|----------|------------------|

|                           |              |                  |
|---------------------------|--------------|------------------|
| Butland et al. (2005)     | 15690043     | Escherichia coli |
| Butland et al. (2005)     | 15690043     | Escherichia coli |
| Pan et al.                | imex:IM-9154 | Escherichia coli |
| Arifuzzaman et al. (2006) | 16606699     | Escherichia coli |
| Arifuzzaman et al. (2006) | 16606699     | Escherichia coli |
| Butland et al. (2005)     | 15690043     | Escherichia coli |

|                                |               |                  |
|--------------------------------|---------------|------------------|
| Rajagopala et al. (2009)       | 19834901      | Escherichia coli |
| Arifuzzaman et al. (2006)      | 16606699      | Escherichia coli |
| Butland et al. (2005)          | 15690043      | Escherichia coli |
| Butland et al. (2005)          | 15690043      | Escherichia coli |
| Butland et al. (2005)          | 15690043      | Escherichia coli |
| Butland et al. (2005)          | 15690043      | Escherichia coli |
| Butland et al. (2005)          | 15690043      | Escherichia coli |
| Butland et al. (2005)          | 15690043      | Escherichia coli |
| Butland et al. (2005)          | 15690043      | Escherichia coli |
| Butland et al. (2005)          | 15690043      | Escherichia coli |
| Rajagopala et al. (2009)       | 19834901      | Escherichia coli |
| Martinez-Hackert et al. (2009) | imex:IM-12086 | Escherichia coli |
| Arifuzzaman et al. (2006)      | 16606699      | Escherichia coli |
| Arifuzzaman et al. (2006)      | 16606699      | Escherichia coli |
| Butland et al. (2005)          | 15690043      | Escherichia coli |
| Butland et al. (2005)          | 15690043      | Escherichia coli |
| Arifuzzaman et al. (2006)      | 16606699      | Escherichia coli |
| Butland et al. (2005)          | 15690043      | Escherichia coli |
| Martinez-Hackert et al. (2009) | imex:IM-12086 | Escherichia coli |
| Arifuzzaman et al. (2006)      | 16606699      | Escherichia coli |
| Butland et al. (2005)          | 15690043      | Escherichia coli |
| Butland et al. (2005)          | 15690043      | Escherichia coli |
| Butland et al. (2005)          | 15690043      | Escherichia coli |

|                           |              |                  |
|---------------------------|--------------|------------------|
| Pan et al.                | imex:IM-9154 | Escherichia coli |
| Arifuzzaman et al. (2006) | 16606699     | Escherichia coli |
| Butland et al. (2005)     | 15690043     | Escherichia coli |
| Arifuzzaman et al. (2006) | 16606699     | Escherichia coli |
| Arifuzzaman et al. (2006) | 16606699     | Escherichia coli |
| Arifuzzaman et al. (2006) | 16606699     | Escherichia coli |
| Butland et al. (2005)     | 15690043     | Escherichia coli |
| Arifuzzaman et al. (2006) | 16606699     | Escherichia coli |
| Kumar et al. (2004)       | 15004283     | Escherichia coli |
| Arifuzzaman et al. (2006) | 16606699     | Escherichia coli |

|                       |          |                  |
|-----------------------|----------|------------------|
| Butland et al. (2005) | 15690043 | Escherichia coli |
|-----------------------|----------|------------------|

|                                |               |                  |
|--------------------------------|---------------|------------------|
| Arifuzzaman et al. (2006)      | 16606699      | Escherichia coli |
| Rajagopala et al. (2009)       | 19834901      | Escherichia coli |
| Arifuzzaman et al. (2006)      | 16606699      | Escherichia coli |
| Arifuzzaman et al. (2006)      | 16606699      | Escherichia coli |
| Butland et al. (2005)          | 15690043      | Escherichia coli |
| Butland et al. (2005)          | 15690043      | Escherichia coli |
| Butland et al. (2005)          | 15690043      | Escherichia coli |
| Arifuzzaman et al. (2006)      | 16606699      | Escherichia coli |
| Arifuzzaman et al. (2006)      | 16606699      | Escherichia coli |
| Arifuzzaman et al. (2006)      | 16606699      | Escherichia coli |
| Arifuzzaman et al. (2006)      | 16606699      | Escherichia coli |
| Rajagopala et al. (2009)       | 19834901      | Escherichia coli |
| Butland et al. (2005)          | 15690043      | Escherichia coli |
| Arifuzzaman et al. (2006)      | 16606699      | Escherichia coli |
| Butland et al. (2005)          | 15690043      | Escherichia coli |
| Butland et al. (2005)          | 15690043      | Escherichia coli |
| Arifuzzaman et al. (2006)      | 16606699      | Escherichia coli |
| Arifuzzaman et al. (2006)      | 16606699      | Escherichia coli |
| Martinez-Hackert et al. (2009) | imex:IM-12086 | Escherichia coli |
| Arifuzzaman et al. (2006)      | 16606699      | Escherichia coli |
| Arifuzzaman et al. (2006)      | 16606699      | Escherichia coli |
| Arifuzzaman et al. (2006)      | 16606699      | Escherichia coli |
| Butland et al. (2005)          | 15690043      | Escherichia coli |
| Butland et al. (2005)          | 15690043      | Escherichia coli |
| Butland et al. (2005)          | 15690043      | Escherichia coli |
| Arifuzzaman et al. (2006)      | 16606699      | Escherichia coli |
| Arifuzzaman et al. (2006)      | 16606699      | Escherichia coli |
| Arifuzzaman et al. (2006)      | 16606699      | Escherichia coli |
| Arifuzzaman et al. (2006)      | 16606699      | Escherichia coli |
| Kumar et al. (2004)            | 15004283      | Escherichia coli |

|                           |                           |
|---------------------------|---------------------------|
| Arifuzzaman et al. (2006) | 16606699 Escherichia coli |
| Arifuzzaman et al. (2006) | 16606699 Escherichia coli |
| Rajagopala et al. (2009)  | 19834901 Escherichia coli |
| Arifuzzaman et al. (2006) | 16606699 Escherichia coli |
| Butland et al. (2005)     | 15690043 Escherichia coli |
| Arifuzzaman et al. (2006) | 16606699 Escherichia coli |
| Arifuzzaman et al. (2006) | 16606699 Escherichia coli |
| Arifuzzaman et al. (2006) | 16606699 Escherichia coli |
| Arifuzzaman et al. (2006) | 16606699 Escherichia coli |
| Arifuzzaman et al. (2006) | 16606699 Escherichia coli |
| Arifuzzaman et al. (2006) | 16606699 Escherichia coli |
| Lennon et al. (2000)      | 10947986 Escherichia coli |
| Arifuzzaman et al. (2006) | 16606699 Escherichia coli |
| Butland et al. (2005)     | 15690043 Escherichia coli |
| Butland et al. (2005)     | 15690043 Escherichia coli |
| Butland et al. (2005)     | 15690043 Escherichia coli |
| Arifuzzaman et al. (2006) | 16606699 Escherichia coli |
| Arifuzzaman et al. (2006) | 16606699 Escherichia coli |
| Arifuzzaman et al. (2006) | 16606699 Escherichia coli |
| Arifuzzaman et al. (2006) | 16606699 Escherichia coli |
| Arifuzzaman et al. (2006) | 16606699 Escherichia coli |
| Arifuzzaman et al. (2006) | 16606699 Escherichia coli |
| Arifuzzaman et al. (2006) | 16606699 Escherichia coli |
| Arifuzzaman et al. (2006) | 16606699 Escherichia coli |
| Arifuzzaman et al. (2006) | 16606699 Escherichia coli |
| Arifuzzaman et al. (2006) | 16606699 Escherichia coli |
| Kumar et al. (2004)       | 15004283 Escherichia coli |
| Arifuzzaman et al. (2006) | 16606699 Escherichia coli |
| Arifuzzaman et al. (2006) | 16606699 Escherichia coli |
| Arifuzzaman et al. (2006) | 16606699 Escherichia coli |
| Butland et al. (2005)     | 15690043 Escherichia coli |



Arifuzzaman et al. (2006) 16606699 Escherichia coli

Butland et al. (2005) 15690043 Escherichia coli

Arifuzzaman et al. (2006) 16606699 Escherichia coli

Arifuzzaman et al. (2006) 16606699 Escherichia coli

Arifuzzaman et al. (2006) 16606699 Escherichia coli

Bochkareva et al. (2002) 12071968 Escherichia coli

Arifuzzaman et al. (2006) 16606699 Escherichia coli

Butland et al. (2005) 15690043 Escherichia coli

Arifuzzaman et al. (2006) 16606699 Escherichia coli

Butland et al. (2005) 15690043 Escherichia coli

Arifuzzaman et al. (2006) 16606699 Escherichia coli

Butland et al. (2005) 15690043 Escherichia coli

Arifuzzaman et al. (2006) 16606699 Escherichia coli



|                           |                           |
|---------------------------|---------------------------|
| Arifuzzaman et al. (2006) | 16606699 Escherichia coli |
| Butland et al. (2005)     | 15690043 Escherichia coli |
| Arifuzzaman et al. (2006) | 16606699 Escherichia coli |
| Arifuzzaman et al. (2006) | 16606699 Escherichia coli |
| Arifuzzaman et al. (2006) | 16606699 Escherichia coli |
| Arifuzzaman et al. (2006) | 16606699 Escherichia coli |
| Butland et al. (2005)     | 15690043 Escherichia coli |
| Butland et al. (2005)     | 15690043 Escherichia coli |
| Arifuzzaman et al. (2006) | 16606699 Escherichia coli |
| Arifuzzaman et al. (2006) | 16606699 Escherichia coli |
| Stenberg et al. (2005)    | 16079137 Escherichia coli |
| Arifuzzaman et al. (2006) | 16606699 Escherichia coli |
| Butland et al. (2005)     | 15690043 Escherichia coli |
| Arifuzzaman et al. (2006) | 16606699 Escherichia coli |
| Arifuzzaman et al. (2006) | 16606699 Escherichia coli |
| Arifuzzaman et al. (2006) | 16606699 Escherichia coli |
| Butland et al. (2005)     | 15690043 Escherichia coli |
| Butland et al. (2005)     | 15690043 Escherichia coli |
| Lasserre et al. (2006)    | 16858726 Escherichia coli |
| Butland et al. (2005)     | 15690043 Escherichia coli |

|                           |                           |
|---------------------------|---------------------------|
| Butland et al. (2005)     | 15690043 Escherichia coli |
| Arifuzzaman et al. (2006) | 16606699 Escherichia coli |
| Stenberg et al. (2005)    | 16079137 Escherichia coli |
| Butland et al. (2005)     | 15690043 Escherichia coli |
| Butland et al. (2005)     | 15690043 Escherichia coli |
| Butland et al. (2005)     | 15690043 Escherichia coli |
| Kumar et al. (2004)       | 15004283 Escherichia coli |
| Kumar et al. (2004)       | 15004283 Escherichia coli |
| Butland et al. (2005)     | 15690043 Escherichia coli |
| Arifuzzaman et al. (2006) | 16606699 Escherichia coli |
| Arifuzzaman et al. (2006) | 16606699 Escherichia coli |
| Arifuzzaman et al. (2006) | 16606699 Escherichia coli |
| Arifuzzaman et al. (2006) | 16606699 Escherichia coli |
| Arifuzzaman et al. (2006) | 16606699 Escherichia coli |
| Arifuzzaman et al. (2006) | 16606699 Escherichia coli |
| Butland et al. (2005)     | 15690043 Escherichia coli |
| Butland et al. (2005)     | 15690043 Escherichia coli |
| Kumar et al. (2004)       | 15004283 Escherichia coli |
| Kumar et al. (2004)       | 15004283 Escherichia coli |
| Butland et al. (2005)     | 15690043 Escherichia coli |
| Gully et al. (2006)       | 16294310 Escherichia coli |
| Gully et al. (2006)       | 16294310 Escherichia coli |
| Gully et al. (2006)       | 16294310 Escherichia coli |
| Gully et al. (2006)       | 16294310 Escherichia coli |
| Butland et al. (2005)     | 15690043 Escherichia coli |
| Gully et al. (2006)       | 16294310 Escherichia coli |
| Arifuzzaman et al. (2006) | 16606699 Escherichia coli |
| Butland et al. (2005)     | 15690043 Escherichia coli |

Butland et al. (2005) 15690043 Escherichia coli

Arifuzzaman et al. (2006) 16606699 Escherichia coli

Butland et al. (2005) 15690043 Escherichia coli

Butland et al. (2005) 15690043 Escherichia coli

Butland et al. (2005) 15690043 Escherichia coli

Arifuzzaman et al. (2006) 16606699 Escherichia coli

Butland et al. (2005) 15690043 Escherichia coli

Butland et al. (2005) 15690043 Escherichia coli

Arifuzzaman et al. (2006) 16606699 Escherichia coli

Arifuzzaman et al. (2006) 16606699 Escherichia coli

Butland et al. (2005) 15690043 Escherichia coli

Arifuzzaman et al. (2006) 16606699 Escherichia coli

|                           |                           |
|---------------------------|---------------------------|
| Arifuzzaman et al. (2006) | 16606699 Escherichia coli |
| Arifuzzaman et al. (2006) | 16606699 Escherichia coli |
| Arifuzzaman et al. (2006) | 16606699 Escherichia coli |

|                       |                           |
|-----------------------|---------------------------|
| Butland et al. (2005) | 15690043 Escherichia coli |
|-----------------------|---------------------------|

|                           |                           |
|---------------------------|---------------------------|
| Arifuzzaman et al. (2006) | 16606699 Escherichia coli |
|---------------------------|---------------------------|

|                           |                           |
|---------------------------|---------------------------|
| Arifuzzaman et al. (2006) | 16606699 Escherichia coli |
|---------------------------|---------------------------|

|                           |                           |
|---------------------------|---------------------------|
| Butland et al. (2005)     | 15690043 Escherichia coli |
| Arifuzzaman et al. (2006) | 16606699 Escherichia coli |

|                           |                           |
|---------------------------|---------------------------|
| Arifuzzaman et al. (2006) | 16606699 Escherichia coli |
|---------------------------|---------------------------|

|                           |                           |
|---------------------------|---------------------------|
| Arifuzzaman et al. (2006) | 16606699 Escherichia coli |
|---------------------------|---------------------------|

|                       |                           |
|-----------------------|---------------------------|
| Butland et al. (2005) | 15690043 Escherichia coli |
| Butland et al. (2005) | 15690043 Escherichia coli |
| Butland et al. (2005) | 15690043 Escherichia coli |

|                       |                           |
|-----------------------|---------------------------|
| Butland et al. (2005) | 15690043 Escherichia coli |
| Butland et al. (2005) | 15690043 Escherichia coli |
| Butland et al. (2005) | 15690043 Escherichia coli |
| Butland et al. (2005) | 15690043 Escherichia coli |
| Butland et al. (2005) | 15690043 Escherichia coli |
| Butland et al. (2005) | 15690043 Escherichia coli |
| Butland et al. (2005) | 15690043 Escherichia coli |
| Butland et al. (2005) | 15690043 Escherichia coli |
| Butland et al. (2005) | 15690043 Escherichia coli |
| Butland et al. (2005) | 15690043 Escherichia coli |

|                           |                           |
|---------------------------|---------------------------|
| Butland et al. (2005)     | 15690043 Escherichia coli |
| Arifuzzaman et al. (2006) | 16606699 Escherichia coli |

|                           |                           |
|---------------------------|---------------------------|
| Arifuzzaman et al. (2006) | 16606699 Escherichia coli |
| Arifuzzaman et al. (2006) | 16606699 Escherichia coli |

|                           |                           |
|---------------------------|---------------------------|
| Arifuzzaman et al. (2006) | 16606699 Escherichia coli |
| Arifuzzaman et al. (2006) | 16606699 Escherichia coli |

|                           |                           |
|---------------------------|---------------------------|
| Arifuzzaman et al. (2006) | 16606699 Escherichia coli |
|---------------------------|---------------------------|

|                       |                           |
|-----------------------|---------------------------|
| Butland et al. (2005) | 15690043 Escherichia coli |
|-----------------------|---------------------------|

|                       |                           |
|-----------------------|---------------------------|
| Butland et al. (2005) | 15690043 Escherichia coli |
| Butland et al. (2005) | 15690043 Escherichia coli |
| Butland et al. (2005) | 15690043 Escherichia coli |
| Butland et al. (2005) | 15690043 Escherichia coli |

|                           |                           |
|---------------------------|---------------------------|
| Arifuzzaman et al. (2006) | 16606699 Escherichia coli |
| Kumar et al. (2004)       | 15004283 Escherichia coli |
| Butland et al. (2005)     | 15690043 Escherichia coli |
| Arifuzzaman et al. (2006) | 16606699 Escherichia coli |
| Arifuzzaman et al. (2006) | 16606699 Escherichia coli |
| Arifuzzaman et al. (2006) | 16606699 Escherichia coli |
| Arifuzzaman et al. (2006) | 16606699 Escherichia coli |
| Arifuzzaman et al. (2006) | 16606699 Escherichia coli |
| Arifuzzaman et al. (2006) | 16606699 Escherichia coli |
| Butland et al. (2005)     | 15690043 Escherichia coli |
| Arifuzzaman et al. (2006) | 16606699 Escherichia coli |
| Arifuzzaman et al. (2006) | 16606699 Escherichia coli |
| Arifuzzaman et al. (2006) | 16606699 Escherichia coli |
| Arifuzzaman et al. (2006) | 16606699 Escherichia coli |
| Butland et al. (2005)     | 15690043 Escherichia coli |
| Arifuzzaman et al. (2006) | 16606699 Escherichia coli |
| Butland et al. (2005)     | 15690043 Escherichia coli |
| Arifuzzaman et al. (2006) | 16606699 Escherichia coli |
| Arifuzzaman et al. (2006) | 16606699 Escherichia coli |
| Arifuzzaman et al. (2006) | 16606699 Escherichia coli |
| Butland et al. (2005)     | 15690043 Escherichia coli |
| Butland et al. (2005)     | 15690043 Escherichia coli |
| Arifuzzaman et al. (2006) | 16606699 Escherichia coli |



Butland et al. (2005) 15690043 Escherichia coli

Butland et al. (2005) 15690043 Escherichia coli  
Butland et al. (2005) 15690043 Escherichia coli  
Butland et al. (2005) 15690043 Escherichia coli  
Butland et al. (2005) 15690043 Escherichia coli

Arifuzzaman et al. (2006) 16606699 Escherichia coli

Arifuzzaman et al. (2006) 16606699 Escherichia coli  
Arifuzzaman et al. (2006) 16606699 Escherichia coli  
Arifuzzaman et al. (2006) 16606699 Escherichia coli  
Arifuzzaman et al. (2006) 16606699 Escherichia coli  
Arifuzzaman et al. (2006) 16606699 Escherichia coli  
Arifuzzaman et al. (2006) 16606699 Escherichia coli  
Arifuzzaman et al. (2006) 16606699 Escherichia coli  
Arifuzzaman et al. (2006) 16606699 Escherichia coli  
Arifuzzaman et al. (2006) 16606699 Escherichia coli

Arifuzzaman et al. (2006) 16606699 Escherichia coli  
Arifuzzaman et al. (2006) 16606699 Escherichia coli

Butland et al. (2005) 15690043 Escherichia coli  
Butland et al. (2005) 15690043 Escherichia coli

Butland et al. (2005) 15690043 Escherichia coli



|                                |               |                  |
|--------------------------------|---------------|------------------|
| Martinez-Hackert et al. (2009) | imex:IM-12086 | Escherichia coli |
| Butland et al. (2005)          | 15690043      | Escherichia coli |
| Butland et al. (2005)          | 15690043      | Escherichia coli |
| Butland et al. (2005)          | 15690043      | Escherichia coli |
| Butland et al. (2005)          | 15690043      | Escherichia coli |
| Butland et al. (2005)          | 15690043      | Escherichia coli |
| Butland et al. (2005)          | 15690043      | Escherichia coli |
| Stenberg et al. (2005)         | 16079137      | Escherichia coli |
| Arifuzzaman et al. (2006)      | 16606699      | Escherichia coli |
| Butland et al. (2005)          | 15690043      | Escherichia coli |
| Arifuzzaman et al. (2006)      | 16606699      | Escherichia coli |
| Arifuzzaman et al. (2006)      | 16606699      | Escherichia coli |
| Butland et al. (2005)          | 15690043      | Escherichia coli |
| Butland et al. (2005)          | 15690043      | Escherichia coli |
| Arifuzzaman et al. (2006)      | 16606699      | Escherichia coli |
| Arifuzzaman et al. (2006)      | 16606699      | Escherichia coli |
| Arifuzzaman et al. (2006)      | 16606699      | Escherichia coli |
| Arifuzzaman et al. (2006)      | 16606699      | Escherichia coli |
| Arifuzzaman et al. (2006)      | 16606699      | Escherichia coli |
| Arifuzzaman et al. (2006)      | 16606699      | Escherichia coli |
| Arifuzzaman et al. (2006)      | 16606699      | Escherichia coli |
| Arifuzzaman et al. (2006)      | 16606699      | Escherichia coli |
| Butland et al. (2005)          | 15690043      | Escherichia coli |
| Arifuzzaman et al. (2006)      | 16606699      | Escherichia coli |
| Butland et al. (2005)          | 15690043      | Escherichia coli |
| Arifuzzaman et al. (2006)      | 16606699      | Escherichia coli |
| Arifuzzaman et al. (2006)      | 16606699      | Escherichia coli |
| Butland et al. (2005)          | 15690043      | Escherichia coli |

|                           |                           |
|---------------------------|---------------------------|
| Arifuzzaman et al. (2006) | 16606699 Escherichia coli |
| Arifuzzaman et al. (2006) | 16606699 Escherichia coli |
| Arifuzzaman et al. (2006) | 16606699 Escherichia coli |
| Arifuzzaman et al. (2006) | 16606699 Escherichia coli |
| Arifuzzaman et al. (2006) | 16606699 Escherichia coli |
| Butland et al. (2005)     | 15690043 Escherichia coli |
| Butland et al. (2005)     | 15690043 Escherichia coli |
| Arifuzzaman et al. (2006) | 16606699 Escherichia coli |
| Arifuzzaman et al. (2006) | 16606699 Escherichia coli |
| Arifuzzaman et al. (2006) | 16606699 Escherichia coli |
| Arifuzzaman et al. (2006) | 16606699 Escherichia coli |
| Butland et al. (2005)     | 15690043 Escherichia coli |
| Arifuzzaman et al. (2006) | 16606699 Escherichia coli |
| Arifuzzaman et al. (2006) | 16606699 Escherichia coli |
| Arifuzzaman et al. (2006) | 16606699 Escherichia coli |
| Arifuzzaman et al. (2006) | 16606699 Escherichia coli |
| Arifuzzaman et al. (2006) | 16606699 Escherichia coli |
| Arifuzzaman et al. (2006) | 16606699 Escherichia coli |
| Butland et al. (2005)     | 15690043 Escherichia coli |
| Arifuzzaman et al. (2006) | 16606699 Escherichia coli |
| Arifuzzaman et al. (2006) | 16606699 Escherichia coli |
| Arifuzzaman et al. (2006) | 16606699 Escherichia coli |

Arifuzzaman et al. (2006) 16606699 Escherichia coli

Butland et al. (2005) 15690043 Escherichia coli  
Butland et al. (2005) 15690043 Escherichia coli  
Arifuzzaman et al. (2006) 16606699 Escherichia coli  
Butland et al. (2005) 15690043 Escherichia coli  
Arifuzzaman et al. (2006) 16606699 Escherichia coli

Arifuzzaman et al. (2006) 16606699 Escherichia coli  
Arifuzzaman et al. (2006) 16606699 Escherichia coli

Arifuzzaman et al. (2006) 16606699 Escherichia coli  
Arifuzzaman et al. (2006) 16606699 Escherichia coli

Butland et al. (2005) 15690043 Escherichia coli  
Butland et al. (2005) 15690043 Escherichia coli  
Butland et al. (2005) 15690043 Escherichia coli

Butland et al. (2005) 15690043 Escherichia coli  
Butland et al. (2005) 15690043 Escherichia coli  
Butland et al. (2005) 15690043 Escherichia coli  
Butland et al. (2005) 15690043 Escherichia coli

Butland et al. (2005) 15690043 Escherichia coli  
Butland et al. (2005) 15690043 Escherichia coli

|                       |                           |
|-----------------------|---------------------------|
| Butland et al. (2005) | 15690043 Escherichia coli |
| Butland et al. (2005) | 15690043 Escherichia coli |
| Butland et al. (2005) | 15690043 Escherichia coli |
| Butland et al. (2005) | 15690043 Escherichia coli |
| Butland et al. (2005) | 15690043 Escherichia coli |
| Butland et al. (2005) | 15690043 Escherichia coli |

|                       |                           |
|-----------------------|---------------------------|
| Butland et al. (2005) | 15690043 Escherichia coli |
|-----------------------|---------------------------|

|                     |                           |
|---------------------|---------------------------|
| Kumar et al. (2004) | 15004283 Escherichia coli |
|---------------------|---------------------------|

|                           |                           |
|---------------------------|---------------------------|
| Arifuzzaman et al. (2006) | 16606699 Escherichia coli |
|---------------------------|---------------------------|

|                           |                           |
|---------------------------|---------------------------|
| Arifuzzaman et al. (2006) | 16606699 Escherichia coli |
| Butland et al. (2005)     | 15690043 Escherichia coli |

|                           |                           |
|---------------------------|---------------------------|
| Arifuzzaman et al. (2006) | 16606699 Escherichia coli |
| Arifuzzaman et al. (2006) | 16606699 Escherichia coli |
| Arifuzzaman et al. (2006) | 16606699 Escherichia coli |
| Arifuzzaman et al. (2006) | 16606699 Escherichia coli |
| Butland et al. (2005)     | 15690043 Escherichia coli |
| Arifuzzaman et al. (2006) | 16606699 Escherichia coli |

|                           |                           |
|---------------------------|---------------------------|
| Arifuzzaman et al. (2006) | 16606699 Escherichia coli |
|---------------------------|---------------------------|

|                           |                           |
|---------------------------|---------------------------|
| Arifuzzaman et al. (2006) | 16606699 Escherichia coli |
| Arifuzzaman et al. (2006) | 16606699 Escherichia coli |
| Butland et al. (2005)     | 15690043 Escherichia coli |
| Butland et al. (2005)     | 15690043 Escherichia coli |

Lasserre et al. (2006) 16858726 Escherichia coli

Butland et al. (2005) 15690043 Escherichia coli

Arifuzzaman et al. (2006) 16606699 Escherichia coli  
Butland et al. (2005) 15690043 Escherichia coli

Butland et al. (2005) 15690043 Escherichia coli  
Arifuzzaman et al. (2006) 16606699 Escherichia coli  
Arifuzzaman et al. (2006) 16606699 Escherichia coli  
Arifuzzaman et al. (2006) 16606699 Escherichia coli

Arifuzzaman et al. (2006) 16606699 Escherichia coli  
Arifuzzaman et al. (2006) 16606699 Escherichia coli  
Arifuzzaman et al. (2006) 16606699 Escherichia coli  
Arifuzzaman et al. (2006) 16606699 Escherichia coli  
Arifuzzaman et al. (2006) 16606699 Escherichia coli

|                           |                           |
|---------------------------|---------------------------|
| Arifuzzaman et al. (2006) | 16606699 Escherichia coli |
| Arifuzzaman et al. (2006) | 16606699 Escherichia coli |
| Arifuzzaman et al. (2006) | 16606699 Escherichia coli |
| Arifuzzaman et al. (2006) | 16606699 Escherichia coli |
| Arifuzzaman et al. (2006) | 16606699 Escherichia coli |
| Arifuzzaman et al. (2006) | 16606699 Escherichia coli |

|                       |                           |
|-----------------------|---------------------------|
| Butland et al. (2005) | 15690043 Escherichia coli |
|-----------------------|---------------------------|

|                           |                           |
|---------------------------|---------------------------|
| Arifuzzaman et al. (2006) | 16606699 Escherichia coli |
| Arifuzzaman et al. (2006) | 16606699 Escherichia coli |
| Arifuzzaman et al. (2006) | 16606699 Escherichia coli |

|                           |                           |
|---------------------------|---------------------------|
| Arifuzzaman et al. (2006) | 16606699 Escherichia coli |
|---------------------------|---------------------------|



| Taxid interactor B | Interaction type     | Source database | Interaction identifier |
|--------------------|----------------------|-----------------|------------------------|
| Escherichia coli   | association          | intact          | EBI-1138667            |
| Escherichia coli   | association          | intact          | EBI-1141685            |
| Escherichia coli   | association          | intact          | EBI-1145252            |
| Escherichia coli   | association          | intact          | EBI-1142253            |
| Escherichia coli   | association          | intact          | EBI-1136282            |
| Escherichia coli   | association          | intact          | EBI-890206             |
| Escherichia coli   | physical association | intact          | EBI-882574             |
| Escherichia coli   | association          | intact          | EBI-890114             |
| Escherichia coli   | association          | intact          | EBI-882138             |
| Escherichia coli   | association          | intact          | EBI-879694             |
| Escherichia coli   | association          | intact          | EBI-879643             |
| Escherichia coli   | association          | intact          | EBI-883980             |
| Escherichia coli   | association          | intact          | EBI-879539             |
| Escherichia coli   | association          | intact          | EBI-888958             |
| Escherichia coli   | association          | intact          | EBI-887293             |
| Escherichia coli   | association          | intact          | EBI-1138875            |
| Escherichia coli   | association          | intact          | EBI-886859             |
| Escherichia coli   | association          | intact          | EBI-888239             |
| Escherichia coli   | association          | intact          | EBI-1137852            |
| Escherichia coli   | association          | intact          | EBI-884491             |
| Escherichia coli   | association          | intact          | EBI-881046             |
| Escherichia coli   | association          | intact          | EBI-882671             |
| Escherichia coli   | association          | intact          | EBI-886257             |
| Escherichia coli   | association          | intact          | EBI-888366             |
| Escherichia coli   | association          | intact          | EBI-1145305            |
| Escherichia coli   | association          | intact          | EBI-885490             |
| Escherichia coli   | association          | intact          | EBI-886932             |
| Escherichia coli   | association          | intact          | EBI-886859             |
| Escherichia coli   | association          | intact          | EBI-1137072            |
| Escherichia coli   | association          | intact          | EBI-881973             |
| Escherichia coli   | association          | intact          | EBI-894235             |
| Escherichia coli   | association          | intact          | EBI-1145987            |
| Escherichia coli   | association          | intact          | EBI-893379             |

|                  |             |        |             |
|------------------|-------------|--------|-------------|
| Escherichia coli | association | intact | EBI-1135819 |
| Escherichia coli | association | intact | EBI-1140113 |
| Escherichia coli | association | intact | EBI-1141045 |
| Escherichia coli | association | intact | EBI-1145830 |
| Escherichia coli | association | intact | EBI-1142937 |
| Escherichia coli | association | intact | EBI-1139510 |
| Escherichia coli | association | intact | EBI-1143946 |
| Escherichia coli | association | intact | EBI-1135640 |
| Escherichia coli | association | intact | EBI-1141111 |
| Escherichia coli | association | intact | EBI-371377  |
| Escherichia coli | association | intact | EBI-369356  |
| Escherichia coli | association | intact | EBI-371168  |
| Escherichia coli | association | intact | EBI-1141136 |
| Escherichia coli | association | intact | EBI-1139361 |
| Escherichia coli | association | intact | EBI-881486  |
| Escherichia coli | association | intact | EBI-893240  |
| Escherichia coli | association | intact | EBI-894594  |
| Escherichia coli | association | intact | EBI-886668  |
| Escherichia coli | association | intact | EBI-884705  |
| Escherichia coli | association | intact | EBI-853009  |
| Escherichia coli | association | intact | EBI-889283  |
| Escherichia coli | association | intact | EBI-887888  |
| Escherichia coli | association | intact | EBI-883621  |
| Escherichia coli | association | intact | EBI-889279  |
| Escherichia coli | association | intact | EBI-884206  |
| Escherichia coli | association | intact | EBI-880023  |
| Escherichia coli | association | intact | EBI-880082  |
| Escherichia coli | association | intact | EBI-888239  |
| Escherichia coli | association | intact | EBI-882652  |
| Escherichia coli | association | intact | EBI-371168  |
| Escherichia coli | association | intact | EBI-880291  |
| Escherichia coli | association | intact | EBI-883047  |
| Escherichia coli | association | intact | EBI-1143946 |
| Escherichia coli | association | intact | EBI-1135327 |
| Escherichia coli | association | intact | EBI-1141073 |
| Escherichia coli | association | intact | EBI-880876  |
| Escherichia coli | association | intact | EBI-890346  |

|                  |                      |        |             |
|------------------|----------------------|--------|-------------|
| Escherichia coli | association          | intact | EBI-1139162 |
| Escherichia coli | association          | intact | EBI-1142466 |
| Escherichia coli | association          | intact | EBI-1136229 |
| Escherichia coli | association          | intact | EBI-891405  |
| Escherichia coli | association          | intact | EBI-1146919 |
| Escherichia coli | association          | intact | EBI-1146778 |
| Escherichia coli | association          | intact | EBI-1146237 |
| Escherichia coli | association          | intact | EBI-1141637 |
| Escherichia coli | association          | intact | EBI-1145783 |
| Escherichia coli | association          | intact | EBI-1143130 |
| Escherichia coli | association          | intact | EBI-1136963 |
| Escherichia coli | association          | intact | EBI-1136409 |
| Escherichia coli | association          | intact | EBI-1145137 |
| Escherichia coli | association          | intact | EBI-1146164 |
| Escherichia coli | association          | intact | EBI-1141533 |
| Escherichia coli | association          | intact | EBI-1137512 |
| Escherichia coli | association          | intact | EBI-1140708 |
| Escherichia coli | association          | intact | EBI-1142937 |
| Escherichia coli | association          | intact | EBI-1142551 |
| Escherichia coli | association          | intact | EBI-1143979 |
| Escherichia coli | association          | intact | EBI-1136744 |
| Escherichia coli | association          | intact | EBI-1138006 |
| Escherichia coli | association          | intact | EBI-1143701 |
| Escherichia coli | association          | intact | EBI-1146826 |
| Escherichia coli | association          | intact | EBI-1146870 |
| Escherichia coli | association          | intact | EBI-1135292 |
| Escherichia coli | physical association | intact | EBI-1147423 |
| Escherichia coli | association          | intact | EBI-1137163 |
| Escherichia coli | association          | intact | EBI-1135376 |
| Escherichia coli | association          | intact | EBI-1137180 |
| Escherichia coli | association          | intact | EBI-1141045 |
| Escherichia coli | association          | intact | EBI-1147760 |
| Escherichia coli | association          | intact | EBI-1136063 |
| Escherichia coli | association          | intact | EBI-1139510 |
| Escherichia coli | association          | intact | EBI-1147078 |
| Escherichia coli | physical association | intact | EBI-1139552 |
| Escherichia coli | association          | intact | EBI-1137384 |
| Escherichia coli | association          | intact | EBI-1141304 |
| Escherichia coli | association          | intact | EBI-1136071 |
| Escherichia coli | association          | intact | EBI-1136079 |
| Escherichia coli | association          | intact | EBI-1140084 |

|                  |                      |        |             |
|------------------|----------------------|--------|-------------|
| Escherichia coli | association          | intact | EBI-1141395 |
| Escherichia coli | association          | intact | EBI-1138683 |
| Escherichia coli | association          | intact | EBI-882138  |
| Escherichia coli | association          | intact | EBI-878935  |
| Escherichia coli | association          | intact | EBI-885677  |
| Escherichia coli | association          | intact | EBI-879643  |
| Escherichia coli | association          | intact | EBI-883980  |
| Escherichia coli | association          | intact | EBI-888637  |
| Escherichia coli | association          | intact | EBI-880595  |
| Escherichia coli | association          | intact | EBI-892291  |
| Escherichia coli | association          | intact | EBI-878697  |
| Escherichia coli | association          | intact | EBI-882671  |
| Escherichia coli | association          | intact | EBI-882920  |
| Escherichia coli | association          | intact | EBI-878757  |
| Escherichia coli | association          | intact | EBI-1140146 |
| Escherichia coli | association          | intact | EBI-890751  |
| Escherichia coli | association          | intact | EBI-886932  |
| Escherichia coli | association          | intact | EBI-2463360 |
| Escherichia coli | physical association | intact | EBI-1771009 |
| Escherichia coli | association          | intact | EBI-371168  |
| Escherichia coli | association          | intact | EBI-881925  |
| Escherichia coli | association          | intact | EBI-887783  |
| Escherichia coli | association          | intact | EBI-1141216 |
| Escherichia coli | association          | intact | EBI-1137180 |
| Escherichia coli | association          | intact | EBI-1137009 |
| Escherichia coli | association          | intact | EBI-1137983 |
| Escherichia coli | association          | intact | EBI-886272  |
| Escherichia coli | association          | intact | EBI-1138091 |
| Escherichia coli | association          | intact | EBI-1139921 |
| Escherichia coli | association          | intact | EBI-1143283 |
| Escherichia coli | association          | intact | EBI-1146962 |
| Escherichia coli | association          | intact | EBI-1138332 |
| Escherichia coli | association          | intact | EBI-1144972 |

|                  |             |        |             |
|------------------|-------------|--------|-------------|
| Escherichia coli | association | intact | EBI-1139852 |
| Escherichia coli | association | intact | EBI-2504619 |
| Escherichia coli | association | intact | EBI-2504669 |
| Escherichia coli | association | intact | EBI-1141584 |
| Escherichia coli | association | intact | EBI-1141506 |
| Escherichia coli | association | intact | EBI-1147570 |
| Escherichia coli | association | intact | EBI-1147760 |
| Escherichia coli | association | intact | EBI-1146735 |
| Escherichia coli | association | intact | EBI-891845  |
| Escherichia coli | association | intact | EBI-1145723 |
| Escherichia coli | association | intact | EBI-881199  |
| Escherichia coli | association | intact | EBI-880251  |
| Escherichia coli | association | intact | EBI-1145517 |
| Escherichia coli | association | intact | EBI-888366  |
| Escherichia coli | association | intact | EBI-879997  |
| Escherichia coli | association | intact | EBI-887996  |
| Escherichia coli | association | intact | EBI-887996  |
| Escherichia coli | association | intact | EBI-883484  |
| Escherichia coli | association | intact | EBI-881680  |
| Escherichia coli | association | intact | EBI-1141725 |

|                  |                      |        |             |
|------------------|----------------------|--------|-------------|
| Escherichia coli | association          | intact | EBI-1142565 |
| Escherichia coli | association          | intact | EBI-1136808 |
| Escherichia coli | association          | intact | EBI-1139180 |
| Escherichia coli | physical association | intact | EBI-1771024 |
| Escherichia coli | association          | intact | EBI-1139180 |
| Escherichia coli | association          | intact | EBI-887539  |
| Escherichia coli | physical association | intact | EBI-906600  |
| Escherichia coli | association          | intact | EBI-1146605 |
| Escherichia coli | association          | intact | EBI-1146620 |
| Escherichia coli | association          | intact | EBI-881946  |
| Escherichia coli | association          | intact | EBI-878843  |
| Escherichia coli | association          | intact | EBI-1137655 |
| Escherichia coli | association          | intact | EBI-369356  |
| Escherichia coli | association          | intact | EBI-1137384 |
| Escherichia coli | association          | intact | EBI-1136432 |
| Escherichia coli | association          | intact | EBI-1137194 |
| Escherichia coli | physical association | intact | EBI-906660  |
| Escherichia coli | physical association | intact | EBI-878836  |
| Escherichia coli | physical association | intact | EBI-1212150 |
| Escherichia coli | physical association | intact | EBI-1212418 |
| Escherichia coli | physical association | intact | EBI-1213240 |
| Escherichia coli | association          | intact | EBI-1146620 |
| Escherichia coli | association          | intact | EBI-878843  |
| Escherichia coli | association          | intact | EBI-1141189 |
| Escherichia coli | association          | intact | EBI-1141152 |
| Escherichia coli | association          | intact | EBI-883621  |
| Escherichia coli | association          | intact | EBI-1146778 |
| Escherichia coli | association          | intact | EBI-1141725 |
| Escherichia coli | association          | intact | EBI-883047  |
| Escherichia coli | association          | intact | EBI-887624  |
| Escherichia coli | association          | intact | EBI-880023  |
| Escherichia coli | association          | intact | EBI-888239  |
| Escherichia coli | association          | intact | EBI-1144893 |
| Escherichia coli | association          | intact | EBI-894222  |
| Escherichia coli | association          | intact | EBI-879304  |
| Escherichia coli | association          | intact | EBI-369356  |
| Escherichia coli | association          | intact | EBI-371168  |
| Escherichia coli | association          | intact | EBI-1139089 |

|                  |                      |        |             |
|------------------|----------------------|--------|-------------|
| Escherichia coli | association          | intact | EBI-1141261 |
| Escherichia coli | association          | intact | EBI-1141559 |
| Escherichia coli | association          | intact | EBI-1142177 |
| Escherichia coli | physical association | intact | EBI-1213240 |
| Escherichia coli | association          | intact | EBI-1144337 |
| Escherichia coli | physical association | intact | EBI-906660  |
| Escherichia coli | physical association | intact | EBI-1213240 |
| Escherichia coli | association          | intact | EBI-884189  |
| Escherichia coli | association          | intact | EBI-1140079 |
| Escherichia coli | association          | intact | EBI-1146797 |
| Escherichia coli | physical association | intact | EBI-1139194 |
| Escherichia coli | association          | intact | EBI-1138875 |
| Escherichia coli | association          | intact | EBI-1146741 |
| Escherichia coli | physical association | intact | EBI-1213240 |
| Escherichia coli | association          | intact | EBI-1138496 |
| Escherichia coli | association          | intact | EBI-889393  |
| Escherichia coli | association          | intact | EBI-1143773 |
| Escherichia coli | association          | intact | EBI-1137587 |
| Escherichia coli | association          | intact | EBI-1141855 |
| Escherichia coli | association          | intact | EBI-1140007 |
| Escherichia coli | association          | intact | EBI-1143684 |
| Escherichia coli | association          | intact | EBI-890485  |
| Escherichia coli | association          | intact | EBI-1142232 |
| Escherichia coli | association          | intact | EBI-1136185 |
| Escherichia coli | association          | intact | EBI-887783  |
| Escherichia coli | association          | intact | EBI-1144049 |
| Escherichia coli | association          | intact | EBI-881486  |
| Escherichia coli | association          | intact | EBI-1144258 |

|                  |                      |        |             |
|------------------|----------------------|--------|-------------|
| Escherichia coli | association          | intact | EBI-895256  |
| Escherichia coli | association          | intact | EBI-886105  |
| Escherichia coli | association          | intact | EBI-1145321 |
| Escherichia coli | association          | intact | EBI-1145063 |
| Escherichia coli | association          | intact | EBI-1135846 |
| Escherichia coli | association          | intact | EBI-895127  |
| Escherichia coli | association          | intact | EBI-887499  |
| Escherichia coli | association          | intact | EBI-1137163 |
| Escherichia coli | association          | intact | EBI-1140682 |
| Escherichia coli | association          | intact | EBI-1146360 |
| Escherichia coli | association          | intact | EBI-1135423 |
| Escherichia coli | association          | intact | EBI-1138145 |
| Escherichia coli | association          | intact | EBI-1138123 |
| Escherichia coli | association          | intact | EBI-1144382 |
| Escherichia coli | association          | intact | EBI-893379  |
| Escherichia coli | association          | intact | EBI-890346  |
| Escherichia coli | physical association | intact | EBI-906984  |
| Escherichia coli | association          | intact | EBI-892599  |
| Escherichia coli | association          | intact | EBI-886059  |
| Escherichia coli | association          | intact | EBI-2463360 |
| Escherichia coli | association          | intact | EBI-888030  |
| Escherichia coli | association          | intact | EBI-1141725 |
| Escherichia coli | direct interaction   | intact | EBI-1037278 |



|                  |                      |        |             |
|------------------|----------------------|--------|-------------|
| Escherichia coli | direct interaction   | intact | EBI-1038181 |
| Escherichia coli | direct interaction   | intact | EBI-1040048 |
| Escherichia coli | physical association | intact | EBI-1141830 |
| Escherichia coli | association          | intact | EBI-369356  |
| Escherichia coli | association          | intact | EBI-1144119 |
| Escherichia coli | association          | intact | EBI-1139577 |
| Escherichia coli | association          | intact | EBI-1139584 |
| Escherichia coli | association          | intact | EBI-1135857 |
| Escherichia coli | association          | intact | EBI-1147293 |
| Escherichia coli | association          | intact | EBI-1136471 |
| Escherichia coli | association          | intact | EBI-1143271 |
| Escherichia coli | physical association | intact | EBI-1147479 |
| Escherichia coli | association          | intact | EBI-1144751 |
| Escherichia coli | association          | intact | EBI-1136818 |
| Escherichia coli | association          | intact | EBI-1144900 |
| Escherichia coli | association          | intact | EBI-888995  |
| Escherichia coli | association          | intact | EBI-881555  |
| Escherichia coli | association          | intact | EBI-1142184 |
| Escherichia coli | association          | intact | EBI-1141014 |
| Escherichia coli | association          | intact | EBI-1137002 |
| Escherichia coli | association          | intact | EBI-1136939 |
| Escherichia coli | physical association | intact | EBI-1147426 |
| Escherichia coli | association          | intact | EBI-1141551 |
| Escherichia coli | association          | intact | EBI-887044  |
| Escherichia coli | association          | intact | EBI-1140357 |
| Escherichia coli | association          | intact | EBI-1135479 |
| Escherichia coli | association          | intact | EBI-1136229 |
| Escherichia coli | association          | intact | EBI-1144049 |
| Escherichia coli | association          | intact | EBI-1144302 |
| Escherichia coli | association          | intact | EBI-1142346 |
| Escherichia coli | physical association | intact | EBI-1142351 |
| Escherichia coli | association          | intact | EBI-1145778 |
| Escherichia coli | association          | intact | EBI-1140532 |
| Escherichia coli | association          | intact | EBI-1147297 |
| Escherichia coli | association          | intact | EBI-1138211 |
| Escherichia coli | association          | intact | EBI-1143729 |
| Escherichia coli | association          | intact | EBI-1140682 |
| Escherichia coli | physical association | intact | EBI-1140679 |
| Escherichia coli | physical association | intact | EBI-1140689 |

|                  |                      |        |             |
|------------------|----------------------|--------|-------------|
| Escherichia coli | association          | intact | EBI-1140674 |
| Escherichia coli | physical association | intact | EBI-1142218 |
| Escherichia coli | association          | intact | EBI-1136170 |
| Escherichia coli | association          | intact | EBI-1146569 |
| Escherichia coli | association          | intact | EBI-1137919 |
| Escherichia coli | association          | intact | EBI-1137933 |
| Escherichia coli | association          | intact | EBI-1137938 |
| Escherichia coli | association          | intact | EBI-1137929 |
| Escherichia coli | association          | intact | EBI-1145825 |
| Escherichia coli | association          | intact | EBI-1140564 |
| Escherichia coli | association          | intact | EBI-1140568 |
| Escherichia coli | association          | intact | EBI-1137227 |
| Escherichia coli | association          | intact | EBI-1135386 |
| Escherichia coli | association          | intact | EBI-1135667 |
| Escherichia coli | association          | intact | EBI-1135376 |
| Escherichia coli | association          | intact | EBI-1140631 |
| Escherichia coli | association          | intact | EBI-1138573 |
| Escherichia coli | association          | intact | EBI-1140641 |
| Escherichia coli | physical association | intact | EBI-1140647 |
| Escherichia coli | association          | intact | EBI-1141181 |
| Escherichia coli | physical association | intact | EBI-883032  |
| Escherichia coli | association          | intact | EBI-1140667 |
| Escherichia coli | association          | intact | EBI-1137791 |
| Escherichia coli | association          | intact | EBI-1137443 |
| Escherichia coli | association          | intact | EBI-1137435 |
| Escherichia coli | association          | intact | EBI-884584  |
| Escherichia coli | association          | intact | EBI-891481  |
| Escherichia coli | association          | intact | EBI-1136626 |
| Escherichia coli | association          | intact | EBI-1147143 |
| Escherichia coli | association          | intact | EBI-1137507 |
| Escherichia coli | association          | intact | EBI-1141584 |
| Escherichia coli | physical association | intact | EBI-1136723 |
| Escherichia coli | association          | intact | EBI-1136866 |
| Escherichia coli | association          | intact | EBI-1144031 |
| Escherichia coli | association          | intact | EBI-1137207 |
| Escherichia coli | association          | intact | EBI-1136570 |
| Escherichia coli | association          | intact | EBI-1142775 |
| Escherichia coli | association          | intact | EBI-1143833 |
| Escherichia coli | physical association | intact | EBI-1143874 |
| Escherichia coli | physical association | intact | EBI-1142975 |
| Escherichia coli | association          | intact | EBI-1139588 |
| Escherichia coli | association          | intact | EBI-1146061 |
| Escherichia coli | association          | intact | EBI-1139975 |
| Escherichia coli | association          | intact | EBI-1135863 |
| Escherichia coli | association          | intact | EBI-1141506 |

|                  |                      |        |             |
|------------------|----------------------|--------|-------------|
| Escherichia coli | association          | intact | EBI-880564  |
| Escherichia coli | association          | intact | EBI-1142684 |
| Escherichia coli | association          | intact | EBI-1139965 |
| Escherichia coli | association          | intact | EBI-1139961 |
| Escherichia coli | association          | intact | EBI-1146494 |
| Escherichia coli | association          | intact | EBI-1135747 |
| Escherichia coli | association          | intact | EBI-1135661 |
| Escherichia coli | physical association | intact | EBI-1137799 |
| Escherichia coli | association          | intact | EBI-1137555 |
| Escherichia coli | association          | intact | EBI-1142005 |
| Escherichia coli | association          | intact | EBI-1145744 |
| Escherichia coli | physical association | intact | EBI-1140867 |
| Escherichia coli | association          | intact | EBI-1140853 |
| Escherichia coli | association          | intact | EBI-1146527 |
| Escherichia coli | association          | intact | EBI-1137450 |
| Escherichia coli | association          | intact | EBI-1146094 |
| Escherichia coli | association          | intact | EBI-1142650 |
| Escherichia coli | physical association | intact | EBI-1145330 |
| Escherichia coli | physical association | intact | EBI-1142015 |
| Escherichia coli | association          | intact | EBI-1135787 |
| Escherichia coli | association          | intact | EBI-1144759 |
| Escherichia coli | association          | intact | EBI-1137295 |
| Escherichia coli | association          | intact | EBI-1137280 |
| Escherichia coli | association          | intact | EBI-1137240 |
| Escherichia coli | association          | intact | EBI-1137180 |
| Escherichia coli | physical association | intact | EBI-1142851 |
| Escherichia coli | physical association | intact | EBI-1142854 |
| Escherichia coli | association          | intact | EBI-1142828 |
| Escherichia coli | association          | intact | EBI-1142607 |
| Escherichia coli | association          | intact | EBI-1136030 |
| Escherichia coli | association          | intact | EBI-1141778 |
| Escherichia coli | association          | intact | EBI-1146919 |
| Escherichia coli | association          | intact | EBI-1147409 |
| Escherichia coli | association          | intact | EBI-1139940 |
| Escherichia coli | association          | intact | EBI-1139735 |
| Escherichia coli | physical association | intact | EBI-1147807 |
| Escherichia coli | association          | intact | EBI-1147814 |
| Escherichia coli | association          | intact | EBI-1137265 |
| Escherichia coli | association          | intact | EBI-1137252 |
| Escherichia coli | association          | intact | EBI-1137234 |
| Escherichia coli | physical association | intact | EBI-1143770 |
| Escherichia coli | association          | intact | EBI-1139991 |
| Escherichia coli | association          | intact | EBI-1135416 |
| Escherichia coli | association          | intact | EBI-1135423 |
| Escherichia coli | association          | intact | EBI-1141433 |

|                  |                      |        |             |
|------------------|----------------------|--------|-------------|
| Escherichia coli | association          | intact | EBI-1141446 |
| Escherichia coli | association          | intact | EBI-1141480 |
| Escherichia coli | association          | intact | EBI-894724  |
| Escherichia coli | association          | intact | EBI-1141341 |
| Escherichia coli | association          | intact | EBI-1137095 |
| Escherichia coli | association          | intact | EBI-1145702 |
| Escherichia coli | association          | intact | EBI-1135996 |
| Escherichia coli | association          | intact | EBI-1135523 |
| Escherichia coli | physical association | intact | EBI-1146937 |
| Escherichia coli | association          | intact | EBI-888030  |
| Escherichia coli | association          | intact | EBI-881078  |
| Escherichia coli | association          | intact | EBI-1145961 |
| Escherichia coli | association          | intact | EBI-1144002 |
| Escherichia coli | association          | intact | EBI-1143596 |
| Escherichia coli | association          | intact | EBI-1146053 |
| Escherichia coli | association          | intact | EBI-1146057 |
| Escherichia coli | association          | intact | EBI-1141725 |
| Escherichia coli | association          | intact | EBI-1142029 |
| Escherichia coli | association          | intact | EBI-1141898 |
| Escherichia coli | association          | intact | EBI-1141888 |
| Escherichia coli | association          | intact | EBI-1141917 |
| Escherichia coli | association          | intact | EBI-1136956 |
| Escherichia coli | association          | intact | EBI-1144688 |
| Escherichia coli | physical association | intact | EBI-1144028 |
| Escherichia coli | association          | intact | EBI-1144485 |
| Escherichia coli | association          | intact | EBI-1141693 |
| Escherichia coli | physical association | intact | EBI-1145872 |
| Escherichia coli | association          | intact | EBI-1145888 |
| Escherichia coli | association          | intact | EBI-1145878 |
| Escherichia coli | association          | intact | EBI-1135754 |
| Escherichia coli | association          | intact | EBI-1142301 |
| Escherichia coli | association          | intact | EBI-1142312 |
| Escherichia coli | association          | intact | EBI-1145859 |
| Escherichia coli | association          | intact | EBI-1146486 |
| Escherichia coli | association          | intact | EBI-1139471 |
| Escherichia coli | physical association | intact | EBI-1145583 |
| Escherichia coli | association          | intact | EBI-1143961 |
| Escherichia coli | association          | intact | EBI-1143966 |
| Escherichia coli | association          | intact | EBI-1143201 |
| Escherichia coli | association          | intact | EBI-1143209 |
| Escherichia coli | physical association | intact | EBI-1143192 |
| Escherichia coli | association          | intact | EBI-1143188 |
| Escherichia coli | association          | intact | EBI-1140294 |
| Escherichia coli | association          | intact | EBI-887624  |
| Escherichia coli | association          | intact | EBI-1138489 |

|                  |                      |        |             |
|------------------|----------------------|--------|-------------|
| Escherichia coli | association          | intact | EBI-1146797 |
| Escherichia coli | physical association | intact | EBI-1142524 |
| Escherichia coli | physical association | intact | EBI-1146271 |
| Escherichia coli | association          | intact | EBI-1143229 |
| Escherichia coli | association          | intact | EBI-1136343 |
| Escherichia coli | association          | intact | EBI-1135581 |
| Escherichia coli | physical association | intact | EBI-1137527 |
| Escherichia coli | association          | intact | EBI-1135700 |
| Escherichia coli | association          | intact | EBI-1138705 |
| Escherichia coli | association          | intact | EBI-1135696 |
| Escherichia coli | association          | intact | EBI-1144524 |
| Escherichia coli | association          | intact | EBI-1144509 |
| Escherichia coli | association          | intact | EBI-1143752 |
| Escherichia coli | association          | intact | EBI-1143748 |
| Escherichia coli | physical association | intact | EBI-1143726 |
| Escherichia coli | physical association | intact | EBI-884719  |
| Escherichia coli | physical association | intact | EBI-891542  |
| Escherichia coli | association          | intact | EBI-1143017 |
| Escherichia coli | association          | intact | EBI-1143023 |
| Escherichia coli | association          | intact | EBI-885026  |
| Escherichia coli | association          | intact | EBI-1143763 |
| Escherichia coli | association          | intact | EBI-1144597 |
| Escherichia coli | association          | intact | EBI-888615  |
| Escherichia coli | physical association | intact | EBI-1147783 |
| Escherichia coli | association          | intact | EBI-1142289 |
| Escherichia coli | association          | intact | EBI-1147790 |
| Escherichia coli | association          | intact | EBI-1140208 |
| Escherichia coli | association          | intact | EBI-889390  |
| Escherichia coli | association          | intact | EBI-892784  |
| Escherichia coli | association          | intact | EBI-1146265 |
| Escherichia coli | association          | intact | EBI-881294  |
| Escherichia coli | association          | intact | EBI-1139204 |
| Escherichia coli | association          | intact | EBI-1144139 |
| Escherichia coli | association          | intact | EBI-1135438 |
| Escherichia coli | association          | intact | EBI-1145657 |
| Escherichia coli | association          | intact | EBI-1135297 |
| Escherichia coli | association          | intact | EBI-1139633 |
| Escherichia coli | association          | intact | EBI-1145680 |
| Escherichia coli | physical association | intact | EBI-1139177 |
| Escherichia coli | association          | intact | EBI-1140873 |
| Escherichia coli | association          | intact | EBI-1139133 |
| Escherichia coli | association          | intact | EBI-1147515 |
| Escherichia coli | association          | intact | EBI-1135515 |
| Escherichia coli | association          | intact | EBI-1138274 |
| Escherichia coli | association          | intact | EBI-891329  |

|                  |                      |        |             |
|------------------|----------------------|--------|-------------|
| Escherichia coli | association          | intact | EBI-1137482 |
| Escherichia coli | association          | intact | EBI-1145928 |
| Escherichia coli | association          | intact | EBI-1145934 |
| Escherichia coli | association          | intact | EBI-1146220 |
| Escherichia coli | association          | intact | EBI-1135833 |
| Escherichia coli | association          | intact | EBI-1135572 |
| Escherichia coli | association          | intact | EBI-1137052 |
| Escherichia coli | physical association | intact | EBI-1140026 |
| Escherichia coli | association          | intact | EBI-1140029 |
| Escherichia coli | association          | intact | EBI-1140007 |
| Escherichia coli | association          | intact | EBI-1140020 |
| Escherichia coli | association          | intact | EBI-1136448 |
| Escherichia coli | association          | intact | EBI-1140299 |
| Escherichia coli | association          | intact | EBI-879887  |
| Escherichia coli | association          | intact | EBI-1136467 |
| Escherichia coli | association          | intact | EBI-1136146 |
| Escherichia coli | physical association | intact | EBI-889484  |
| Escherichia coli | association          | intact | EBI-1144586 |
| Escherichia coli | association          | intact | EBI-1147482 |
| Escherichia coli | association          | intact | EBI-1142385 |
| Escherichia coli | physical association | intact | EBI-1147283 |
| Escherichia coli | association          | intact | EBI-1144540 |
| Escherichia coli | association          | intact | EBI-1147118 |
| Escherichia coli | association          | intact | EBI-1144372 |
| Escherichia coli | association          | intact | EBI-1142018 |
| Escherichia coli | association          | intact | EBI-1136321 |
| Escherichia coli | association          | intact | EBI-1136328 |
| Escherichia coli | association          | intact | EBI-1147615 |
| Escherichia coli | association          | intact | EBI-1137637 |
| Escherichia coli | physical association | intact | EBI-1142622 |
| Escherichia coli | association          | intact | EBI-884363  |
| Escherichia coli | association          | intact | EBI-887041  |
| Escherichia coli | physical association | intact | EBI-1145127 |
| Escherichia coli | association          | intact | EBI-1141981 |
| Escherichia coli | association          | intact | EBI-1137840 |
| Escherichia coli | association          | intact | EBI-882483  |
| Escherichia coli | association          | intact | EBI-890053  |
| Escherichia coli | association          | intact | EBI-1137952 |
| Escherichia coli | physical association | intact | EBI-1137893 |
| Escherichia coli | association          | intact | EBI-1137885 |
| Escherichia coli | physical association | intact | EBI-1141967 |
| Escherichia coli | association          | intact | EBI-1139559 |
| Escherichia coli | association          | intact | EBI-1144562 |
| Escherichia coli | association          | intact | EBI-1135529 |
| Escherichia coli | association          | intact | EBI-888239  |

|                  |                      |        |             |
|------------------|----------------------|--------|-------------|
| Escherichia coli | association          | intact | EBI-893751  |
| Escherichia coli | association          | intact | EBI-1141045 |
| Escherichia coli | association          | intact | EBI-1144720 |
| Escherichia coli | association          | intact | EBI-1144471 |
| Escherichia coli | association          | intact | EBI-1137512 |
| Escherichia coli | association          | intact | EBI-1137661 |
| Escherichia coli | association          | intact | EBI-1137655 |
| Escherichia coli | association          | intact | EBI-892823  |
| Escherichia coli | association          | intact | EBI-1142947 |
| Escherichia coli | association          | intact | EBI-1139928 |
| Escherichia coli | association          | intact | EBI-893916  |
| Escherichia coli | association          | intact | EBI-1137200 |
| Escherichia coli | physical association | intact | EBI-1135324 |
| Escherichia coli | association          | intact | EBI-1139901 |
| Escherichia coli | association          | intact | EBI-887021  |
| Escherichia coli | association          | intact | EBI-1146002 |
| Escherichia coli | association          | intact | EBI-1147730 |
| Escherichia coli | association          | intact | EBI-1147398 |
| Escherichia coli | association          | intact | EBI-1140909 |
| Escherichia coli | association          | intact | EBI-1142426 |
| Escherichia coli | association          | intact | EBI-890521  |
| Escherichia coli | association          | intact | EBI-1146860 |
| Escherichia coli | association          | intact | EBI-1139302 |
| Escherichia coli | association          | intact | EBI-1139767 |
| Escherichia coli | association          | intact | EBI-1145690 |
| Escherichia coli | association          | intact | EBI-1136564 |
| Escherichia coli | association          | intact | EBI-1143101 |
| Escherichia coli | association          | intact | EBI-1135589 |
| Escherichia coli | association          | intact | EBI-1136022 |
| Escherichia coli | association          | intact | EBI-1147136 |
| Escherichia coli | physical association | intact | EBI-1147458 |
| Escherichia coli | physical association | intact | EBI-1147448 |
| Escherichia coli | association          | intact | EBI-1147442 |
| Escherichia coli | physical association | intact | EBI-1145713 |
| Escherichia coli | association          | intact | EBI-1137743 |
| Escherichia coli | association          | intact | EBI-1144172 |
| Escherichia coli | association          | intact | EBI-1147321 |
| Escherichia coli | association          | intact | EBI-1147715 |
| Escherichia coli | association          | intact | EBI-1138406 |
| Escherichia coli | physical association | intact | EBI-1138940 |
| Escherichia coli | association          | intact | EBI-1143050 |
| Escherichia coli | association          | intact | EBI-1143495 |
| Escherichia coli | association          | intact | EBI-1139876 |
| Escherichia coli | association          | intact | EBI-1136261 |
| Escherichia coli | association          | intact | EBI-1136278 |

|                  |                      |        |             |
|------------------|----------------------|--------|-------------|
| Escherichia coli | association          | intact | EBI-1136282 |
| Escherichia coli | physical association | intact | EBI-1136258 |
| Escherichia coli | association          | intact | EBI-891381  |
| Escherichia coli | association          | intact | EBI-878876  |
| Escherichia coli | association          | intact | EBI-1146582 |
| Escherichia coli | association          | intact | EBI-1142065 |
| Escherichia coli | association          | intact | EBI-1142078 |
| Escherichia coli | association          | intact | EBI-881343  |
| Escherichia coli | association          | intact | EBI-1144343 |
| Escherichia coli | association          | intact | EBI-1140985 |
| Escherichia coli | physical association | intact | EBI-1139232 |
| Escherichia coli | association          | intact | EBI-1138642 |
| Escherichia coli | association          | intact | EBI-1139510 |
| Escherichia coli | association          | intact | EBI-1138439 |
| Escherichia coli | association          | intact | EBI-895127  |
| Escherichia coli | association          | intact | EBI-1147977 |
| Escherichia coli | physical association | intact | EBI-1146648 |
| Escherichia coli | association          | intact | EBI-1141484 |
| Escherichia coli | association          | intact | EBI-1146817 |
| Escherichia coli | association          | intact | EBI-889518  |
| Escherichia coli | physical association | intact | EBI-882102  |
| Escherichia coli | association          | intact | EBI-1146517 |
| Escherichia coli | association          | intact | EBI-1146274 |
| Escherichia coli | association          | intact | EBI-1146349 |
| Escherichia coli | association          | intact | EBI-1146332 |
| Escherichia coli | association          | intact | EBI-1146328 |
| Escherichia coli | association          | intact | EBI-1146342 |
| Escherichia coli | physical association | intact | EBI-1146357 |
| Escherichia coli | association          | intact | EBI-1146316 |
| Escherichia coli | association          | intact | EBI-1146308 |
| Escherichia coli | association          | intact | EBI-1146684 |
| Escherichia coli | association          | intact | EBI-1146958 |
| Escherichia coli | association          | intact | EBI-1146979 |
| Escherichia coli | association          | intact | EBI-1146962 |
| Escherichia coli | association          | intact | EBI-1142317 |
| Escherichia coli | physical association | intact | EBI-1142328 |
| Escherichia coli | association          | intact | EBI-1137716 |
| Escherichia coli | association          | intact | EBI-1136906 |
| Escherichia coli | association          | intact | EBI-1136918 |
| Escherichia coli | association          | intact | EBI-1136918 |
| Escherichia coli | association          | intact | EBI-894235  |
| Escherichia coli | association          | intact | EBI-1136506 |
| Escherichia coli | association          | intact | EBI-1135327 |
| Escherichia coli | physical association | intact | EBI-1138738 |
| Escherichia coli | association          | intact | EBI-1145349 |



|                  |                      |        |             |
|------------------|----------------------|--------|-------------|
| Escherichia coli | association          | intact | EBI-1140928 |
| Escherichia coli | association          | intact | EBI-1145040 |
| Escherichia coli | association          | intact | EBI-1137503 |
| Escherichia coli | association          | intact | EBI-1144013 |
| Escherichia coli | association          | intact | EBI-1143090 |
| Escherichia coli | association          | intact | EBI-1143426 |
| Escherichia coli | physical association | intact | EBI-887248  |
| Escherichia coli | association          | intact | EBI-1141698 |
| Escherichia coli | association          | intact | EBI-1141711 |
| Escherichia coli | physical association | intact | EBI-1140870 |
| Escherichia coli | association          | intact | EBI-1147433 |
| Escherichia coli | association          | intact | EBI-1144087 |
| Escherichia coli | association          | intact | EBI-886442  |
| Escherichia coli | association          | intact | EBI-1135454 |
| Escherichia coli | physical association | intact | EBI-1140213 |
| Escherichia coli | association          | intact | EBI-1140230 |
| Escherichia coli | association          | intact | EBI-1145844 |
| Escherichia coli | association          | intact | EBI-1145849 |
| Escherichia coli | association          | intact | EBI-1138195 |
| Escherichia coli | association          | intact | EBI-1141073 |
| Escherichia coli | association          | intact | EBI-887115  |
| Escherichia coli | association          | intact | EBI-880906  |
| Escherichia coli | physical association | intact | EBI-1141088 |
| Escherichia coli | association          | intact | EBI-1139483 |
| Escherichia coli | association          | intact | EBI-1141330 |
| Escherichia coli | association          | intact | EBI-1136935 |
| Escherichia coli | association          | intact | EBI-1138319 |
| Escherichia coli | physical association | intact | EBI-1146168 |
| Escherichia coli | association          | intact | EBI-1147840 |
| Escherichia coli | physical association | intact | EBI-1147846 |
| Escherichia coli | physical association | intact | EBI-1147837 |
| Escherichia coli | association          | intact | EBI-1135494 |
| Escherichia coli | association          | intact | EBI-1138362 |
| Escherichia coli | association          | intact | EBI-1135645 |
| Escherichia coli | physical association | intact | EBI-1140733 |
| Escherichia coli | association          | intact | EBI-1142107 |
| Escherichia coli | association          | intact | EBI-1143713 |
| Escherichia coli | association          | intact | EBI-1144182 |
| Escherichia coli | association          | intact | EBI-891549  |
| Escherichia coli | association          | intact | EBI-1138421 |
| Escherichia coli | association          | intact | EBI-1138435 |
| Escherichia coli | association          | intact | EBI-1139530 |
| Escherichia coli | association          | intact | EBI-1140493 |
| Escherichia coli | association          | intact | EBI-1144549 |
| Escherichia coli | association          | intact | EBI-1140480 |

|                  |                      |        |             |
|------------------|----------------------|--------|-------------|
| Escherichia coli | association          | intact | EBI-1137534 |
| Escherichia coli | physical association | intact | EBI-1135910 |
| Escherichia coli | association          | intact | EBI-1138290 |
| Escherichia coli | association          | intact | EBI-1143257 |
| Escherichia coli | association          | intact | EBI-1144115 |
| Escherichia coli | association          | intact | EBI-1136384 |
| Escherichia coli | association          | intact | EBI-1144838 |
| Escherichia coli | association          | intact | EBI-1146260 |
| Escherichia coli | association          | intact | EBI-1139830 |
| Escherichia coli | association          | intact | EBI-1136481 |
| Escherichia coli | association          | intact | EBI-1135489 |
| Escherichia coli | association          | intact | EBI-1141940 |
| Escherichia coli | association          | intact | EBI-1147216 |
| Escherichia coli | association          | intact | EBI-1147211 |
| Escherichia coli | physical association | intact | EBI-1147202 |
| Escherichia coli | association          | intact | EBI-1138884 |
| Escherichia coli | association          | intact | EBI-1136521 |
| Escherichia coli | association          | intact | EBI-1141947 |
| Escherichia coli | association          | intact | EBI-1135483 |
| Escherichia coli | association          | intact | EBI-1138562 |
| Escherichia coli | association          | intact | EBI-1141136 |
| Escherichia coli | association          | intact | EBI-1146067 |
| Escherichia coli | association          | intact | EBI-1145396 |
| Escherichia coli | association          | intact | EBI-1144466 |
| Escherichia coli | association          | intact | EBI-1139357 |
| Escherichia coli | association          | intact | EBI-1139361 |
| Escherichia coli | physical association | intact | EBI-1139594 |
| Escherichia coli | physical association | intact | EBI-1144685 |
| Escherichia coli | association          | intact | EBI-1144678 |
| Escherichia coli | association          | intact | EBI-1140241 |
| Escherichia coli | physical association | intact | EBI-1147350 |
| Escherichia coli | association          | intact | EBI-1146759 |
| Escherichia coli | association          | intact | EBI-1137645 |
| Escherichia coli | association          | intact | EBI-1142262 |
| Escherichia coli | association          | intact | EBI-1144266 |
| Escherichia coli | association          | intact | EBI-1142527 |
| Escherichia coli | association          | intact | EBI-1141678 |
| Escherichia coli | physical association | intact | EBI-1147652 |
| Escherichia coli | association          | intact | EBI-894652  |
| Escherichia coli | association          | intact | EBI-889746  |
| Escherichia coli | physical association | intact | EBI-1147646 |
| Escherichia coli | association          | intact | EBI-1143357 |
| Escherichia coli | physical association | intact | EBI-2011463 |
| Escherichia coli | association          | intact | EBI-878894  |
| Escherichia coli | association          | intact | EBI-1137384 |

|                  |                      |        |             |
|------------------|----------------------|--------|-------------|
| Escherichia coli | association          | intact | EBI-1144798 |
| Escherichia coli | association          | intact | EBI-1146303 |
| Escherichia coli | association          | intact | EBI-1136374 |
| Escherichia coli | association          | intact | EBI-1141792 |
| Escherichia coli | association          | intact | EBI-1141786 |
| Escherichia coli | association          | intact | EBI-1141735 |
| Escherichia coli | association          | intact | EBI-1142735 |
| Escherichia coli | association          | intact | EBI-1142731 |
| Escherichia coli | physical association | intact | EBI-1146438 |
| Escherichia coli | physical association | intact | EBI-1135309 |
| Escherichia coli | association          | intact | EBI-1135675 |
| Escherichia coli | association          | intact | EBI-1135913 |
| Escherichia coli | association          | intact | EBI-1135898 |
| Escherichia coli | association          | intact | EBI-1135867 |
| Escherichia coli | association          | intact | EBI-1135950 |
| Escherichia coli | association          | intact | EBI-1135957 |
| Escherichia coli | physical association | intact | EBI-1135965 |
| Escherichia coli | association          | intact | EBI-1135971 |
| Escherichia coli | association          | intact | EBI-1136017 |
| Escherichia coli | physical association | intact | EBI-1136041 |
| Escherichia coli | association          | intact | EBI-1136035 |
| Escherichia coli | association          | intact | EBI-1136044 |
| Escherichia coli | association          | intact | EBI-1136079 |
| Escherichia coli | association          | intact | EBI-1136095 |
| Escherichia coli | association          | intact | EBI-1136101 |
| Escherichia coli | association          | intact | EBI-1136109 |
| Escherichia coli | association          | intact | EBI-1136127 |
| Escherichia coli | association          | intact | EBI-1136132 |
| Escherichia coli | association          | intact | EBI-1136141 |
| Escherichia coli | association          | intact | EBI-1136199 |
| Escherichia coli | association          | intact | EBI-1136211 |
| Escherichia coli | association          | intact | EBI-1136223 |
| Escherichia coli | association          | intact | EBI-1136253 |
| Escherichia coli | association          | intact | EBI-1136399 |
| Escherichia coli | association          | intact | EBI-1136487 |
| Escherichia coli | association          | intact | EBI-1136531 |
| Escherichia coli | association          | intact | EBI-1136849 |
| Escherichia coli | association          | intact | EBI-1136913 |
| Escherichia coli | physical association | intact | EBI-882049  |
| Escherichia coli | association          | intact | EBI-1136885 |
| Escherichia coli | association          | intact | EBI-1136892 |
| Escherichia coli | association          | intact | EBI-1137194 |
| Escherichia coli | association          | intact | EBI-1137127 |
| Escherichia coli | association          | intact | EBI-1137222 |
| Escherichia coli | association          | intact | EBI-1137330 |

|                  |                      |        |             |
|------------------|----------------------|--------|-------------|
| Escherichia coli | association          | intact | EBI-1137336 |
| Escherichia coli | association          | intact | EBI-1137356 |
| Escherichia coli | association          | intact | EBI-1137360 |
| Escherichia coli | association          | intact | EBI-1137403 |
| Escherichia coli | association          | intact | EBI-1137491 |
| Escherichia coli | association          | intact | EBI-1137539 |
| Escherichia coli | association          | intact | EBI-1137548 |
| Escherichia coli | physical association | intact | EBI-1137702 |
| Escherichia coli | association          | intact | EBI-1137727 |
| Escherichia coli | association          | intact | EBI-1137722 |
| Escherichia coli | association          | intact | EBI-1137739 |
| Escherichia coli | association          | intact | EBI-1137759 |
| Escherichia coli | association          | intact | EBI-1137764 |
| Escherichia coli | association          | intact | EBI-1137770 |
| Escherichia coli | association          | intact | EBI-1137783 |
| Escherichia coli | association          | intact | EBI-1137896 |
| Escherichia coli | association          | intact | EBI-1137911 |
| Escherichia coli | association          | intact | EBI-1137943 |
| Escherichia coli | association          | intact | EBI-1137995 |
| Escherichia coli | association          | intact | EBI-1138002 |
| Escherichia coli | association          | intact | EBI-1138086 |
| Escherichia coli | association          | intact | EBI-1138104 |
| Escherichia coli | association          | intact | EBI-1138231 |
| Escherichia coli | association          | intact | EBI-1138347 |
| Escherichia coli | physical association | intact | EBI-1138359 |
| Escherichia coli | association          | intact | EBI-1138389 |
| Escherichia coli | association          | intact | EBI-1138657 |
| Escherichia coli | association          | intact | EBI-1138713 |
| Escherichia coli | association          | intact | EBI-1138867 |
| Escherichia coli | association          | intact | EBI-1139123 |
| Escherichia coli | association          | intact | EBI-889250  |
| Escherichia coli | association          | intact | EBI-1139137 |
| Escherichia coli | association          | intact | EBI-1139284 |
| Escherichia coli | association          | intact | EBI-1139235 |
| Escherichia coli | association          | intact | EBI-1139210 |
| Escherichia coli | association          | intact | EBI-1139466 |
| Escherichia coli | physical association | intact | EBI-1139534 |
| Escherichia coli | association          | intact | EBI-1139542 |
| Escherichia coli | association          | intact | EBI-1139666 |
| Escherichia coli | association          | intact | EBI-1139836 |
| Escherichia coli | physical association | intact | EBI-1139849 |
| Escherichia coli | association          | intact | EBI-1139852 |
| Escherichia coli | association          | intact | EBI-1139892 |
| Escherichia coli | association          | intact | EBI-1140066 |
| Escherichia coli | physical association | intact | EBI-1139985 |

|                  |                      |        |             |
|------------------|----------------------|--------|-------------|
| Escherichia coli | association          | intact | EBI-1139997 |
| Escherichia coli | association          | intact | EBI-1140084 |
| Escherichia coli | physical association | intact | EBI-1140093 |
| Escherichia coli | association          | intact | EBI-1140400 |
| Escherichia coli | association          | intact | EBI-1140527 |
| Escherichia coli | physical association | intact | EBI-1140514 |
| Escherichia coli | physical association | intact | EBI-1140553 |
| Escherichia coli | association          | intact | EBI-1140556 |
| Escherichia coli | association          | intact | EBI-1140761 |
| Escherichia coli | association          | intact | EBI-1140770 |
| Escherichia coli | association          | intact | EBI-1140791 |
| Escherichia coli | association          | intact | EBI-1140807 |
| Escherichia coli | association          | intact | EBI-1140820 |
| Escherichia coli | association          | intact | EBI-1140947 |
| Escherichia coli | association          | intact | EBI-1141336 |
| Escherichia coli | physical association | intact | EBI-1141119 |
| Escherichia coli | association          | intact | EBI-1141395 |
| Escherichia coli | physical association | intact | EBI-1141411 |
| Escherichia coli | association          | intact | EBI-1141527 |
| Escherichia coli | association          | intact | EBI-1141630 |
| Escherichia coli | association          | intact | EBI-1141689 |
| Escherichia coli | association          | intact | EBI-1141685 |
| Escherichia coli | association          | intact | EBI-1141862 |
| Escherichia coli | association          | intact | EBI-1141976 |
| Escherichia coli | association          | intact | EBI-1141987 |
| Escherichia coli | association          | intact | EBI-1142052 |
| Escherichia coli | association          | intact | EBI-1142117 |
| Escherichia coli | association          | intact | EBI-1142138 |
| Escherichia coli | association          | intact | EBI-1142246 |
| Escherichia coli | association          | intact | EBI-1142228 |
| Escherichia coli | association          | intact | EBI-1142451 |
| Escherichia coli | association          | intact | EBI-1142503 |
| Escherichia coli | association          | intact | EBI-1142510 |
| Escherichia coli | association          | intact | EBI-1142519 |
| Escherichia coli | association          | intact | EBI-1142639 |
| Escherichia coli | association          | intact | EBI-1142689 |
| Escherichia coli | association          | intact | EBI-1142806 |
| Escherichia coli | association          | intact | EBI-1143181 |
| Escherichia coli | association          | intact | EBI-1143417 |
| Escherichia coli | association          | intact | EBI-891722  |
| Escherichia coli | association          | intact | EBI-893852  |
| Escherichia coli | physical association | intact | EBI-1143555 |
| Escherichia coli | association          | intact | EBI-1143558 |
| Escherichia coli | association          | intact | EBI-1143562 |
| Escherichia coli | association          | intact | EBI-1143567 |

|                  |                      |        |             |
|------------------|----------------------|--------|-------------|
| Escherichia coli | association          | intact | EBI-1143572 |
| Escherichia coli | physical association | intact | EBI-1143606 |
| Escherichia coli | physical association | intact | EBI-1143593 |
| Escherichia coli | association          | intact | EBI-1143617 |
| Escherichia coli | association          | intact | EBI-1143794 |
| Escherichia coli | physical association | intact | EBI-1143798 |
| Escherichia coli | association          | intact | EBI-1143838 |
| Escherichia coli | association          | intact | EBI-1143866 |
| Escherichia coli | association          | intact | EBI-1143843 |
| Escherichia coli | association          | intact | EBI-1143850 |
| Escherichia coli | association          | intact | EBI-1143860 |
| Escherichia coli | association          | intact | EBI-1143889 |
| Escherichia coli | association          | intact | EBI-1143894 |
| Escherichia coli | physical association | intact | EBI-1143986 |
| Escherichia coli | physical association | intact | EBI-1144132 |
| Escherichia coli | physical association | intact | EBI-1144143 |
| Escherichia coli | association          | intact | EBI-1144158 |
| Escherichia coli | association          | intact | EBI-884764  |
| Escherichia coli | association          | intact | EBI-1144285 |
| Escherichia coli | association          | intact | EBI-1144308 |
| Escherichia coli | physical association | intact | EBI-1144179 |
| Escherichia coli | physical association | intact | EBI-1144420 |
| Escherichia coli | association          | intact | EBI-1144435 |
| Escherichia coli | association          | intact | EBI-1144492 |
| Escherichia coli | physical association | intact | EBI-1144496 |
| Escherichia coli | physical association | intact | EBI-1144533 |
| Escherichia coli | association          | intact | EBI-1144634 |
| Escherichia coli | association          | intact | EBI-1144787 |
| Escherichia coli | association          | intact | EBI-881782  |
| Escherichia coli | association          | intact | EBI-881807  |
| Escherichia coli | physical association | intact | EBI-889312  |
| Escherichia coli | association          | intact | EBI-1144963 |
| Escherichia coli | association          | intact | EBI-1144968 |
| Escherichia coli | association          | intact | EBI-1145166 |
| Escherichia coli | physical association | intact | EBI-1145237 |
| Escherichia coli | physical association | intact | EBI-1145342 |
| Escherichia coli | association          | intact | EBI-1145667 |
| Escherichia coli | association          | intact | EBI-1146009 |
| Escherichia coli | physical association | intact | EBI-1146013 |
| Escherichia coli | association          | intact | EBI-1146016 |
| Escherichia coli | association          | intact | EBI-884186  |
| Escherichia coli | association          | intact | EBI-1146034 |
| Escherichia coli | physical association | intact | EBI-1146071 |
| Escherichia coli | physical association | intact | EBI-1146077 |
| Escherichia coli | association          | intact | EBI-1146112 |

|                  |                      |        |             |
|------------------|----------------------|--------|-------------|
| Escherichia coli | association          | intact | EBI-1146254 |
| Escherichia coli | association          | intact | EBI-887477  |
| Escherichia coli | association          | intact | EBI-1146467 |
| Escherichia coli | association          | intact | EBI-1146475 |
| Escherichia coli | physical association | intact | EBI-1146491 |
| Escherichia coli | physical association | intact | EBI-1146542 |
| Escherichia coli | association          | intact | EBI-1146545 |
| Escherichia coli | association          | intact | EBI-1146718 |
| Escherichia coli | physical association | intact | EBI-1146867 |
| Escherichia coli | association          | intact | EBI-1147576 |
| Escherichia coli | association          | intact | EBI-891042  |
| Escherichia coli | association          | intact | EBI-1147561 |
| Escherichia coli | physical association | intact | EBI-1147685 |
| Escherichia coli | physical association | intact | EBI-1147798 |
| Escherichia coli | association          | intact | EBI-1147830 |
| Escherichia coli | physical association | intact | EBI-1147849 |
| Escherichia coli | association          | intact | EBI-1147852 |
| Escherichia coli | physical association | intact | EBI-1147868 |
| Escherichia coli | physical association | intact | EBI-1147871 |
| Escherichia coli | physical association | intact | EBI-1147883 |
| Escherichia coli | association          | intact | EBI-1147961 |
| Escherichia coli | association          | intact | EBI-1147927 |
| Escherichia coli | association          | intact | EBI-1135979 |
| Escherichia coli | association          | intact | EBI-1136155 |
| Escherichia coli | association          | intact | EBI-1136162 |
| Escherichia coli | association          | intact | EBI-1136986 |
| Escherichia coli | association          | intact | EBI-1137014 |
| Escherichia coli | association          | intact | EBI-1137019 |
| Escherichia coli | association          | intact | EBI-1138998 |
| Escherichia coli | association          | intact | EBI-1139679 |
| Escherichia coli | association          | intact | EBI-1139792 |
| Escherichia coli | association          | intact | EBI-1139871 |
| Escherichia coli | association          | intact | EBI-1140062 |
| Escherichia coli | association          | intact | EBI-1140619 |
| Escherichia coli | association          | intact | EBI-1140703 |
| Escherichia coli | association          | intact | EBI-1140891 |
| Escherichia coli | association          | intact | EBI-1140972 |
| Escherichia coli | association          | intact | EBI-1142177 |
| Escherichia coli | physical association | intact | EBI-1142696 |
| Escherichia coli | physical association | intact | EBI-1142699 |
| Escherichia coli | physical association | intact | EBI-1142708 |
| Escherichia coli | association          | intact | EBI-1142979 |
| Escherichia coli | association          | intact | EBI-1143218 |
| Escherichia coli | association          | intact | EBI-890159  |
| Escherichia coli | association          | intact | EBI-1144607 |

|                  |                      |        |             |
|------------------|----------------------|--------|-------------|
| Escherichia coli | association          | intact | EBI-1144810 |
| Escherichia coli | physical association | intact | EBI-1147695 |
| Escherichia coli | association          | intact | EBI-884929  |
| Escherichia coli | association          | intact | EBI-1141067 |
| Escherichia coli | association          | intact | EBI-1147527 |
| Escherichia coli | association          | intact | EBI-1138835 |
| Escherichia coli | association          | intact | EBI-1138129 |
| Escherichia coli | association          | intact | EBI-1136079 |
| Escherichia coli | association          | intact | EBI-883908  |
| Escherichia coli | association          | intact | EBI-882523  |
| Escherichia coli | association          | intact | EBI-1139809 |
| Escherichia coli | association          | intact | EBI-1143701 |
| Escherichia coli | association          | intact | EBI-885677  |
| Escherichia coli | association          | intact | EBI-884584  |
| Escherichia coli | direct interaction   | intact | EBI-1034817 |
| Escherichia coli | direct interaction   | intact | EBI-1034216 |
| Escherichia coli | association          | intact | EBI-884518  |
| Escherichia coli | association          | intact | EBI-1135863 |
| Escherichia coli | association          | intact | EBI-883621  |
| Escherichia coli | association          | intact | EBI-880291  |
| Escherichia coli | association          | intact | EBI-887148  |
| Escherichia coli | association          | intact | EBI-888637  |
| Escherichia coli | association          | intact | EBI-884206  |
| Escherichia coli | association          | intact | EBI-880166  |
| Escherichia coli | association          | intact | EBI-880828  |
| Escherichia coli | association          | intact | EBI-880023  |
| Escherichia coli | association          | intact | EBI-885106  |
| Escherichia coli | association          | intact | EBI-895127  |
| Escherichia coli | association          | intact | EBI-881374  |
| Escherichia coli | association          | intact | EBI-881132  |
| Escherichia coli | association          | intact | EBI-885288  |
| Escherichia coli | association          | intact | EBI-879914  |
| Escherichia coli | association          | intact | EBI-879304  |
| Escherichia coli | association          | intact | EBI-880876  |
| Escherichia coli | association          | intact | EBI-884360  |
| Escherichia coli | association          | intact | EBI-882920  |
| Escherichia coli | association          | intact | EBI-1146759 |
| Escherichia coli | association          | intact | EBI-888366  |
| Escherichia coli | association          | intact | EBI-1147585 |



|                  |             |        |             |
|------------------|-------------|--------|-------------|
| Escherichia coli | association | intact | EBI-1136944 |
| Escherichia coli | association | intact | EBI-1145978 |
| Escherichia coli | association | intact | EBI-885677  |
| Escherichia coli | association | intact | EBI-885524  |
| Escherichia coli | association | intact | EBI-1138244 |
| Escherichia coli | association | intact | EBI-884518  |
| Escherichia coli | association | intact | EBI-1146377 |
| Escherichia coli | association | intact | EBI-1147535 |
| Escherichia coli | association | intact | EBI-1144842 |
| Escherichia coli | association | intact | EBI-1143469 |
| Escherichia coli | association | intact | EBI-889252  |
| Escherichia coli | association | intact | EBI-885106  |
| Escherichia coli | association | intact | EBI-1147790 |
| Escherichia coli | association | intact | EBI-1141763 |
| Escherichia coli | association | intact | EBI-888239  |
| Escherichia coli | association | intact | EBI-1141045 |
| Escherichia coli | association | intact | EBI-1143101 |
| Escherichia coli | association | intact | EBI-1143979 |
| Escherichia coli | association | intact | EBI-1146342 |
| Escherichia coli | association | intact | EBI-1146316 |
| Escherichia coli | association | intact | EBI-885288  |
| Escherichia coli | association | intact | EBI-1145951 |
| Escherichia coli | association | intact | EBI-1147184 |
| Escherichia coli | association | intact | EBI-887115  |
| Escherichia coli | association | intact | EBI-1147968 |
| Escherichia coli | association | intact | EBI-1145192 |
| Escherichia coli | association | intact | EBI-1147006 |
| Escherichia coli | association | intact | EBI-890346  |
| Escherichia coli | association | intact | EBI-1137222 |
| Escherichia coli | association | intact | EBI-1139892 |
| Escherichia coli | association | intact | EBI-1142273 |
| Escherichia coli | association | intact | EBI-1146254 |
| Escherichia coli | association | intact | EBI-1136162 |
|                  |             |        |             |
| Escherichia coli | association | intact | EBI-1146889 |
| Escherichia coli | association | intact | EBI-1140722 |
|                  |             |        |             |
| Escherichia coli | association | intact | EBI-1135548 |
| Escherichia coli | association | intact | EBI-892187  |
|                  |             |        |             |
| Escherichia coli | association | intact | EBI-2931981 |
| Escherichia coli | association | intact | EBI-882754  |
| Escherichia coli | association | intact | EBI-890557  |

|                  |                      |        |             |
|------------------|----------------------|--------|-------------|
| Escherichia coli | association          | intact | EBI-882523  |
| Escherichia coli | association          | intact | EBI-879539  |
| Escherichia coli | association          | intact | EBI-883767  |
| Escherichia coli | association          | intact | EBI-881486  |
| Escherichia coli | association          | intact | EBI-890575  |
| Escherichia coli | association          | intact | EBI-886556  |
| Escherichia coli | association          | intact | EBI-883271  |
| Escherichia coli | association          | intact | EBI-895275  |
| Escherichia coli | association          | intact | EBI-887152  |
| Escherichia coli | association          | intact | EBI-889283  |
| Escherichia coli | association          | intact | EBI-1136229 |
| Escherichia coli | association          | intact | EBI-883980  |
| Escherichia coli | association          | intact | EBI-1140371 |
| Escherichia coli | association          | intact | EBI-887624  |
| Escherichia coli | association          | intact | EBI-886556  |
| Escherichia coli | physical association | intact | EBI-906948  |
| Escherichia coli | association          | intact | EBI-1143003 |
| Escherichia coli | association          | intact | EBI-879304  |
| Escherichia coli | association          | intact | EBI-1139555 |
| Escherichia coli | association          | intact | EBI-1138294 |
| Escherichia coli | association          | intact | EBI-1135846 |
| Escherichia coli | association          | intact | EBI-1143838 |
| Escherichia coli | association          | intact | EBI-885437  |
| Escherichia coli | physical association | intact | EBI-888332  |
| Escherichia coli | association          | intact | EBI-881190  |
| Escherichia coli | association          | intact | EBI-1142775 |
| Escherichia coli | physical association | intact | EBI-1770958 |
| Escherichia coli | association          | intact | EBI-1147433 |
| Escherichia coli | association          | intact | EBI-1140493 |
| Escherichia coli | association          | intact | EBI-895275  |

|                  |                      |        |             |
|------------------|----------------------|--------|-------------|
| Escherichia coli | association          | intact | EBI-1145252 |
| Escherichia coli | association          | intact | EBI-895025  |
| Escherichia coli | association          | intact | EBI-1144549 |
| Escherichia coli | association          | intact | EBI-1140371 |
| Escherichia coli | association          | intact | EBI-1139751 |
| Escherichia coli | association          | intact | EBI-1145084 |
| Escherichia coli | association          | intact | EBI-883046  |
| Escherichia coli | association          | intact | EBI-1143804 |
| Escherichia coli | association          | intact | EBI-1144912 |
| Escherichia coli | association          | intact | EBI-1141189 |
| Escherichia coli | association          | intact | EBI-1141152 |
| Escherichia coli | physical association | intact | EBI-1142331 |
| Escherichia coli | association          | intact | EBI-881486  |
| Escherichia coli | association          | intact | EBI-894739  |
| Escherichia coli | association          | intact | EBI-1146674 |
| Escherichia coli | association          | intact | EBI-1139729 |
| Escherichia coli | association          | intact | EBI-891424  |
| Escherichia coli | association          | intact | EBI-1137052 |
| Escherichia coli | physical association | intact | EBI-1212150 |
| Escherichia coli | physical association | intact | EBI-1212418 |
| Escherichia coli | association          | intact | EBI-1141189 |
| Escherichia coli | association          | intact | EBI-1141152 |
| Escherichia coli | association          | intact | EBI-1136570 |
| Escherichia coli | association          | intact | EBI-1137265 |
| Escherichia coli | association          | intact | EBI-1137252 |
| Escherichia coli | association          | intact | EBI-1136808 |
| Escherichia coli | association          | intact | EBI-1147698 |
| Escherichia coli | association          | intact | EBI-1135833 |
| Escherichia coli | association          | intact | EBI-1137052 |
| Escherichia coli | association          | intact | EBI-1137971 |
| Escherichia coli | association          | intact | EBI-1135548 |
| Escherichia coli | association          | intact | EBI-1141241 |
| Escherichia coli | association          | intact | EBI-1137072 |
| Escherichia coli | association          | intact | EBI-1146286 |
| Escherichia coli | association          | intact | EBI-2463360 |
| Escherichia coli | association          | intact | EBI-1137384 |
| Escherichia coli | association          | intact | EBI-1136892 |
| Escherichia coli | association          | intact | EBI-1141281 |
| Escherichia coli | association          | intact | EBI-1141559 |
| Escherichia coli | association          | intact | EBI-1146506 |

|                  |                      |        |             |
|------------------|----------------------|--------|-------------|
| Escherichia coli | association          | intact | EBI-1146919 |
| Escherichia coli | association          | intact | EBI-1145680 |
| Escherichia coli | association          | intact | EBI-369356  |
| Escherichia coli | association          | intact | EBI-371168  |
| Escherichia coli | association          | intact | EBI-1136194 |
| Escherichia coli | association          | intact | EBI-1141881 |
| Escherichia coli | association          | intact | EBI-1144031 |
| Escherichia coli | physical association | intact | EBI-1146701 |
| Escherichia coli | association          | intact | EBI-892010  |
| Escherichia coli | association          | intact | EBI-892437  |
| Escherichia coli | association          | intact | EBI-885881  |
| Escherichia coli | association          | intact | EBI-889682  |
| Escherichia coli | association          | intact | EBI-884189  |
| Escherichia coli | physical association | intact | EBI-906966  |
| Escherichia coli | association          | intact | EBI-883980  |
| Escherichia coli | association          | intact | EBI-883767  |
| Escherichia coli | association          | intact | EBI-883848  |
| Escherichia coli | association          | intact | EBI-884415  |
| Escherichia coli | association          | intact | EBI-881486  |
| Escherichia coli | association          | intact | EBI-892889  |
| Escherichia coli | association          | intact | EBI-894927  |
| Escherichia coli | association          | intact | EBI-893249  |
| Escherichia coli | association          | intact | EBI-887368  |
| Escherichia coli | association          | intact | EBI-880595  |
| Escherichia coli | association          | intact | EBI-886556  |
| Escherichia coli | association          | intact | EBI-895331  |
| Escherichia coli | association          | intact | EBI-883484  |
| Escherichia coli | association          | intact | EBI-887783  |
| Escherichia coli | association          | intact | EBI-888757  |
| Escherichia coli | association          | intact | EBI-894976  |
| Escherichia coli | association          | intact | EBI-881701  |
| Escherichia coli | association          | intact | EBI-893916  |
| Escherichia coli | association          | intact | EBI-893285  |
| Escherichia coli | association          | intact | EBI-884958  |
| Escherichia coli | association          | intact | EBI-891089  |
| Escherichia coli | association          | intact | EBI-895127  |
| Escherichia coli | association          | intact | EBI-882652  |
| Escherichia coli | association          | intact | EBI-889160  |
| Escherichia coli | association          | intact | EBI-894235  |
| Escherichia coli | association          | intact | EBI-892010  |

|                  |                      |        |             |
|------------------|----------------------|--------|-------------|
| Escherichia coli | association          | intact | EBI-889536  |
| Escherichia coli | association          | intact | EBI-890236  |
| Escherichia coli | association          | intact | EBI-888507  |
| Escherichia coli | association          | intact | EBI-884810  |
| Escherichia coli | association          | intact | EBI-891136  |
| Escherichia coli | association          | intact | EBI-883271  |
| Escherichia coli | association          | intact | EBI-879304  |
| Escherichia coli | association          | intact | EBI-883170  |
| Escherichia coli | association          | intact | EBI-883046  |
| Escherichia coli | association          | intact | EBI-892437  |
| Escherichia coli | association          | intact | EBI-893588  |
| Escherichia coli | association          | intact | EBI-886668  |
| Escherichia coli | association          | intact | EBI-887918  |
| Escherichia coli | association          | intact | EBI-891913  |
| Escherichia coli | association          | intact | EBI-890426  |
| Escherichia coli | association          | intact | EBI-895222  |
| Escherichia coli | association          | intact | EBI-892692  |
| Escherichia coli | association          | intact | EBI-893705  |
| Escherichia coli | association          | intact | EBI-893650  |
| Escherichia coli | association          | intact | EBI-887304  |
| Escherichia coli | association          | intact | EBI-887152  |
| Escherichia coli | association          | intact | EBI-888366  |
| Escherichia coli | association          | intact | EBI-892264  |
| Escherichia coli | association          | intact | EBI-881754  |
| Escherichia coli | association          | intact | EBI-882921  |
| Escherichia coli | association          | intact | EBI-891424  |
| Escherichia coli | physical association | intact | EBI-1147503 |

|                  |                      |        |            |
|------------------|----------------------|--------|------------|
| Escherichia coli | association          | intact | EBI-882138 |
| Escherichia coli | association          | intact | EBI-884189 |
| Escherichia coli | association          | intact | EBI-883980 |
| Escherichia coli | physical association | intact | EBI-893204 |
| Escherichia coli | association          | intact | EBI-881486 |
| Escherichia coli | association          | intact | EBI-892889 |
| Escherichia coli | association          | intact | EBI-882379 |
| Escherichia coli | association          | intact | EBI-886556 |
| Escherichia coli | association          | intact | EBI-894739 |
| Escherichia coli | association          | intact | EBI-883484 |
| Escherichia coli | association          | intact | EBI-888863 |
| Escherichia coli | association          | intact | EBI-893916 |
| Escherichia coli | association          | intact | EBI-895127 |
| Escherichia coli | association          | intact | EBI-889160 |
| Escherichia coli | association          | intact | EBI-890236 |
| Escherichia coli | association          | intact | EBI-893588 |
| Escherichia coli | association          | intact | EBI-887918 |

|                  |                      |        |             |
|------------------|----------------------|--------|-------------|
| Escherichia coli | association          | intact | EBI-890426  |
| Escherichia coli | association          | intact | EBI-895222  |
| Escherichia coli | association          | intact | EBI-892692  |
| Escherichia coli | association          | intact | EBI-369356  |
| Escherichia coli | association          | intact | EBI-893705  |
| Escherichia coli | association          | intact | EBI-894652  |
| Escherichia coli | association          | intact | EBI-887304  |
| Escherichia coli | association          | intact | EBI-888366  |
| Escherichia coli | association          | intact | EBI-881754  |
| Escherichia coli | association          | intact | EBI-882921  |
| Escherichia coli | association          | intact | EBI-891722  |
| Escherichia coli | association          | intact | EBI-891065  |
| Escherichia coli | association          | intact | EBI-887830  |
| Escherichia coli | association          | intact | EBI-1139975 |
| Escherichia coli | association          | intact | EBI-883577  |
| Escherichia coli | association          | intact | EBI-881166  |
| Escherichia coli | association          | intact | EBI-880023  |
| Escherichia coli | association          | intact | EBI-890346  |
| Escherichia coli | association          | intact | EBI-1135616 |
| Escherichia coli | association          | intact | EBI-893820  |
| Escherichia coli | association          | intact | EBI-888455  |
| Escherichia coli | association          | intact | EBI-1146061 |
| Escherichia coli | association          | intact | EBI-890853  |
| Escherichia coli | association          | intact | EBI-888219  |
| Escherichia coli | association          | intact | EBI-887624  |
| Escherichia coli | association          | intact | EBI-880082  |
| Escherichia coli | association          | intact | EBI-890346  |
| Escherichia coli | association          | intact | EBI-887888  |
| Escherichia coli | association          | intact | EBI-891042  |
| Escherichia coli | association          | intact | EBI-1137431 |
| Escherichia coli | association          | intact | EBI-894976  |
| Escherichia coli | physical association | intact | EBI-889144  |
| Escherichia coli | association          | intact | EBI-1140007 |
| Escherichia coli | association          | intact | EBI-883767  |
| Escherichia coli | association          | intact | EBI-886162  |

|                  |             |        |             |
|------------------|-------------|--------|-------------|
| Escherichia coli | association | intact | EBI-885677  |
| Escherichia coli | association | intact | EBI-879694  |
| Escherichia coli | association | intact | EBI-879643  |
| Escherichia coli | association | intact | EBI-883980  |
| Escherichia coli | association | intact | EBI-879539  |
| Escherichia coli | association | intact | EBI-883621  |
| Escherichia coli | association | intact | EBI-885194  |
| Escherichia coli | association | intact | EBI-887293  |
| Escherichia coli | association | intact | EBI-884130  |
| Escherichia coli | association | intact | EBI-880595  |
| Escherichia coli | association | intact | EBI-880750  |
| Escherichia coli | association | intact | EBI-886705  |
| Escherichia coli | association | intact | EBI-887500  |
| Escherichia coli | association | intact | EBI-881374  |
| Escherichia coli | association | intact | EBI-885288  |
| Escherichia coli | association | intact | EBI-882671  |
| Escherichia coli | association | intact | EBI-888473  |
| Escherichia coli | association | intact | EBI-849240  |
| Escherichia coli | association | intact | EBI-879914  |
| Escherichia coli | association | intact | EBI-883997  |
| Escherichia coli | association | intact | EBI-885881  |
| Escherichia coli | association | intact | EBI-880676  |
| Escherichia coli | association | intact | EBI-886205  |
| Escherichia coli | association | intact | EBI-882273  |
| Escherichia coli | association | intact | EBI-892236  |
| Escherichia coli | association | intact | EBI-878757  |
| Escherichia coli | association | intact | EBI-879491  |
| Escherichia coli | association | intact | EBI-1142466 |
| Escherichia coli | association | intact | EBI-1136229 |
| Escherichia coli | association | intact | EBI-1141703 |
| Escherichia coli | association | intact | EBI-1137091 |
| Escherichia coli | association | intact | EBI-1141091 |
| Escherichia coli | association | intact | EBI-1146870 |
| Escherichia coli | association | intact | EBI-884584  |
| Escherichia coli | association | intact | EBI-1142018 |
| Escherichia coli | association | intact | EBI-1137040 |
| Escherichia coli | association | intact | EBI-895127  |
| Escherichia coli | association | intact | EBI-1139603 |
| Escherichia coli | association | intact | EBI-1136117 |
| Escherichia coli | association | intact | EBI-1147386 |
| Escherichia coli | association | intact | EBI-1142885 |

|                  |                      |        |             |
|------------------|----------------------|--------|-------------|
| Escherichia coli | association          | intact | EBI-1147065 |
| Escherichia coli | association          | intact | EBI-1140845 |
| Escherichia coli | association          | intact | EBI-1146475 |
| Escherichia coli | association          | intact | EBI-1140456 |
| Escherichia coli | association          | intact | EBI-890620  |
| Escherichia coli | association          | intact | EBI-893410  |
| Escherichia coli | association          | intact | EBI-1147019 |
| Escherichia coli | association          | intact | EBI-1137240 |
| Escherichia coli | association          | intact | EBI-2931981 |
| Escherichia coli | association          | intact | EBI-894184  |
| Escherichia coli | association          | intact | EBI-1147293 |
| Escherichia coli | association          | intact | EBI-1136944 |
| Escherichia coli | association          | intact | EBI-1136950 |
| Escherichia coli | association          | intact | EBI-1136939 |
| Escherichia coli | association          | intact | EBI-1142346 |
| Escherichia coli | association          | intact | EBI-1140216 |
| Escherichia coli | association          | intact | EBI-1135403 |
| Escherichia coli | association          | intact | EBI-1135397 |
| Escherichia coli | association          | intact | EBI-1135386 |
| Escherichia coli | association          | intact | EBI-1135382 |
| Escherichia coli | association          | intact | EBI-1142040 |
| Escherichia coli | association          | intact | EBI-1143404 |
| Escherichia coli | association          | intact | EBI-1136646 |
| Escherichia coli | association          | intact | EBI-1137507 |
| Escherichia coli | association          | intact | EBI-1136866 |
| Escherichia coli | association          | intact | EBI-1143877 |
| Escherichia coli | association          | intact | EBI-1136666 |
| Escherichia coli | physical association | intact | EBI-1147500 |
| Escherichia coli | association          | intact | EBI-1142005 |
| Escherichia coli | physical association | intact | EBI-1135463 |
| Escherichia coli | association          | intact | EBI-1135444 |
| Escherichia coli | association          | intact | EBI-1139735 |
| Escherichia coli | association          | intact | EBI-1135423 |
| Escherichia coli | association          | intact | EBI-1135340 |



|                  |                      |        |             |
|------------------|----------------------|--------|-------------|
| Escherichia coli | physical association | intact | EBI-1141422 |
| Escherichia coli | association          | intact | EBI-1140245 |
| Escherichia coli | association          | intact | EBI-1136956 |
| Escherichia coli | association          | intact | EBI-1136971 |
| Escherichia coli | association          | intact | EBI-1139471 |
| Escherichia coli | association          | intact | EBI-1136808 |
| Escherichia coli | association          | intact | EBI-1137559 |
| Escherichia coli | association          | intact | EBI-1143023 |
| Escherichia coli | association          | intact | EBI-1139204 |
| Escherichia coli | association          | intact | EBI-1138355 |
| Escherichia coli | association          | intact | EBI-1135438 |
| Escherichia coli | association          | intact | EBI-1140873 |
| Escherichia coli | association          | intact | EBI-1135833 |
| Escherichia coli | association          | intact | EBI-1135798 |
| Escherichia coli | association          | intact | EBI-1139804 |
| Escherichia coli | association          | intact | EBI-1137637 |
| Escherichia coli | association          | intact | EBI-1137840 |
| Escherichia coli | association          | intact | EBI-1142173 |
| Escherichia coli | physical association | intact | EBI-1139229 |
| Escherichia coli | association          | intact | EBI-1142947 |
| Escherichia coli | association          | intact | EBI-1135600 |
| Escherichia coli | physical association | intact | EBI-1139758 |
| Escherichia coli | association          | intact | EBI-1136564 |
| Escherichia coli | association          | intact | EBI-1147132 |
| Escherichia coli | association          | intact | EBI-1143050 |
| Escherichia coli | association          | intact | EBI-1136794 |
| Escherichia coli | association          | intact | EBI-1139603 |
| Escherichia coli | association          | intact | EBI-1138150 |
| Escherichia coli | association          | intact | EBI-1135846 |
| Escherichia coli | association          | intact | EBI-1147178 |
| Escherichia coli | association          | intact | EBI-1147184 |
| Escherichia coli | association          | intact | EBI-1135770 |
| Escherichia coli | association          | intact | EBI-1145849 |
| Escherichia coli | association          | intact | EBI-1140113 |
| Escherichia coli | association          | intact | EBI-1137818 |
| Escherichia coli | association          | intact | EBI-1137829 |
| Escherichia coli | association          | intact | EBI-1139530 |
| Escherichia coli | association          | intact | EBI-1141145 |
| Escherichia coli | association          | intact | EBI-1140336 |
| Escherichia coli | association          | intact | EBI-1136702 |
| Escherichia coli | association          | intact | EBI-371377  |
| Escherichia coli | association          | intact | EBI-1136591 |
| Escherichia coli | association          | intact | EBI-2463360 |
| Escherichia coli | association          | intact | EBI-1137384 |
| Escherichia coli | association          | intact | EBI-1136487 |

|                  |             |        |             |
|------------------|-------------|--------|-------------|
| Escherichia coli | association | intact | EBI-1136842 |
| Escherichia coli | association | intact | EBI-1136849 |
| Escherichia coli | association | intact | EBI-1136913 |
| Escherichia coli | association | intact | EBI-1137403 |
| Escherichia coli | association | intact | EBI-1137539 |
| Escherichia coli | association | intact | EBI-1139547 |
| Escherichia coli | association | intact | EBI-1139537 |
| Escherichia coli | association | intact | EBI-1139666 |
| Escherichia coli | association | intact | EBI-1139836 |
| Escherichia coli | association | intact | EBI-1140107 |
| Escherichia coli | association | intact | EBI-1140280 |
| Escherichia coli | association | intact | EBI-1140433 |
| Escherichia coli | association | intact | EBI-1142246 |
| Escherichia coli | association | intact | EBI-1142228 |
| Escherichia coli | association | intact | EBI-1143389 |
| Escherichia coli | association | intact | EBI-1143546 |
| Escherichia coli | association | intact | EBI-1144158 |
| Escherichia coli | association | intact | EBI-1143218 |

|                  |             |        |            |
|------------------|-------------|--------|------------|
| Escherichia coli | association | intact | EBI-371168 |
|------------------|-------------|--------|------------|

|                  |             |        |            |
|------------------|-------------|--------|------------|
| Escherichia coli | association | intact | EBI-882138 |
| Escherichia coli | association | intact | EBI-878935 |
| Escherichia coli | association | intact | EBI-879046 |
| Escherichia coli | association | intact | EBI-879628 |
| Escherichia coli | association | intact | EBI-883908 |
| Escherichia coli | association | intact | EBI-887858 |
| Escherichia coli | association | intact | EBI-881035 |
| Escherichia coli | association | intact | EBI-883418 |
| Escherichia coli | association | intact | EBI-892889 |
| Escherichia coli | association | intact | EBI-886509 |
| Escherichia coli | association | intact | EBI-890781 |
| Escherichia coli | association | intact | EBI-894927 |
| Escherichia coli | association | intact | EBI-889335 |
| Escherichia coli | association | intact | EBI-881109 |
| Escherichia coli | association | intact | EBI-882379 |
| Escherichia coli | association | intact | EBI-890451 |
| Escherichia coli | association | intact | EBI-882133 |
| Escherichia coli | association | intact | EBI-882076 |
| Escherichia coli | association | intact | EBI-881177 |
| Escherichia coli | association | intact | EBI-881199 |

|                  |                      |        |             |
|------------------|----------------------|--------|-------------|
| Escherichia coli | association          | intact | EBI-886164  |
| Escherichia coli | association          | intact | EBI-885867  |
| Escherichia coli | association          | intact | EBI-884206  |
| Escherichia coli | association          | intact | EBI-884859  |
| Escherichia coli | association          | intact | EBI-884833  |
| Escherichia coli | association          | intact | EBI-891778  |
| Escherichia coli | association          | intact | EBI-885076  |
| Escherichia coli | association          | intact | EBI-885106  |
| Escherichia coli | association          | intact | EBI-880082  |
| Escherichia coli | physical association | intact | EBI-890292  |
| Escherichia coli | association          | intact | EBI-880536  |
| Escherichia coli | association          | intact | EBI-886364  |
| Escherichia coli | association          | intact | EBI-889553  |
| Escherichia coli | association          | intact | EBI-882847  |
| Escherichia coli | association          | intact | EBI-894976  |
| Escherichia coli | association          | intact | EBI-886395  |
| Escherichia coli | association          | intact | EBI-885776  |
| Escherichia coli | association          | intact | EBI-893916  |
| Escherichia coli | association          | intact | EBI-893969  |
| Escherichia coli | association          | intact | EBI-880717  |
| Escherichia coli | association          | intact | EBI-886788  |
| Escherichia coli | association          | intact | EBI-880739  |
| Escherichia coli | association          | intact | EBI-1135600 |
| Escherichia coli | association          | intact | EBI-890521  |
| Escherichia coli | association          | intact | EBI-882987  |
| Escherichia coli | association          | intact | EBI-881427  |
| Escherichia coli | association          | intact | EBI-878671  |
| Escherichia coli | association          | intact | EBI-883350  |
| Escherichia coli | association          | intact | EBI-1135589 |
| Escherichia coli | association          | intact | EBI-893285  |
| Escherichia coli | association          | intact | EBI-887500  |
| Escherichia coli | association          | intact | EBI-879973  |
| Escherichia coli | association          | intact | EBI-884958  |
| Escherichia coli | association          | intact | EBI-879199  |
| Escherichia coli | association          | intact | EBI-884968  |
| Escherichia coli | association          | intact | EBI-889424  |
| Escherichia coli | association          | intact | EBI-888177  |
| Escherichia coli | association          | intact | EBI-881973  |
| Escherichia coli | association          | intact | EBI-889451  |
| Escherichia coli | association          | intact | EBI-881943  |
| Escherichia coli | association          | intact | EBI-882208  |
| Escherichia coli | association          | intact | EBI-889737  |
| Escherichia coli | association          | intact | EBI-892010  |
| Escherichia coli | association          | intact | EBI-882671  |
| Escherichia coli | association          | intact | EBI-890236  |

|                  |                      |        |             |
|------------------|----------------------|--------|-------------|
| Escherichia coli | association          | intact | EBI-881230  |
| Escherichia coli | association          | intact | EBI-879914  |
| Escherichia coli | association          | intact | EBI-886310  |
| Escherichia coli | association          | intact | EBI-891312  |
| Escherichia coli | association          | intact | EBI-889458  |
| Escherichia coli | association          | intact | EBI-894477  |
| Escherichia coli | association          | intact | EBI-895222  |
| Escherichia coli | association          | intact | EBI-1143374 |
| Escherichia coli | association          | intact | EBI-888130  |
| Escherichia coli | association          | intact | EBI-888082  |
| Escherichia coli | association          | intact | EBI-893650  |
| Escherichia coli | association          | intact | EBI-882273  |
| Escherichia coli | association          | intact | EBI-883201  |
| Escherichia coli | association          | intact | EBI-894652  |
| Escherichia coli | association          | intact | EBI-887304  |
| Escherichia coli | association          | intact | EBI-880948  |
| Escherichia coli | association          | intact | EBI-887152  |
| Escherichia coli | association          | intact | EBI-880917  |
| Escherichia coli | association          | intact | EBI-888366  |
| Escherichia coli | physical association | intact | EBI-881212  |
| Escherichia coli | association          | intact | EBI-880857  |
| Escherichia coli | physical association | intact | EBI-885584  |
| Escherichia coli | association          | intact | EBI-878757  |
| Escherichia coli | association          | intact | EBI-892986  |
| Escherichia coli | association          | intact | EBI-886623  |
| Escherichia coli | association          | intact | EBI-879208  |
| Escherichia coli | association          | intact | EBI-882901  |
| Escherichia coli | physical association | intact | EBI-890091  |
| Escherichia coli | association          | intact | EBI-889250  |
| Escherichia coli | association          | intact | EBI-881743  |
| Escherichia coli | association          | intact | EBI-883545  |
| Escherichia coli | physical association | intact | EBI-879788  |
| Escherichia coli | association          | intact | EBI-881026  |
| Escherichia coli | association          | intact | EBI-891722  |
| Escherichia coli | association          | intact | EBI-888778  |
| Escherichia coli | physical association | intact | EBI-879873  |
| Escherichia coli | association          | intact | EBI-881807  |
| Escherichia coli | association          | intact | EBI-892517  |
| Escherichia coli | association          | intact | EBI-892878  |
| Escherichia coli | association          | intact | EBI-886481  |
| Escherichia coli | association          | intact | EBI-878990  |
| Escherichia coli | association          | intact | EBI-890534  |
| Escherichia coli | association          | intact | EBI-891065  |
| Escherichia coli | association          | intact | EBI-884929  |

|                  |             |        |             |
|------------------|-------------|--------|-------------|
| Escherichia coli | association | intact | EBI-1144597 |
| Escherichia coli | association | intact | EBI-894549  |
| Escherichia coli | association | intact | EBI-1145252 |
| Escherichia coli | association | intact | EBI-1140568 |
| Escherichia coli | association | intact | EBI-1141189 |
| Escherichia coli | association | intact | EBI-883980  |
| Escherichia coli | association | intact | EBI-1136570 |
| Escherichia coli | association | intact | EBI-881486  |
| Escherichia coli | association | intact | EBI-1146392 |
| Escherichia coli | association | intact | EBI-890702  |
| Escherichia coli | association | intact | EBI-883418  |
| Escherichia coli | association | intact | EBI-894882  |
| Escherichia coli | association | intact | EBI-1142857 |
| Escherichia coli | association | intact | EBI-1144053 |
| Escherichia coli | association | intact | EBI-1135340 |
| Escherichia coli | association | intact | EBI-881093  |
| Escherichia coli | association | intact | EBI-882023  |
| Escherichia coli | association | intact | EBI-1145859 |
| Escherichia coli | association | intact | EBI-884206  |
| Escherichia coli | association | intact | EBI-880595  |
| Escherichia coli | association | intact | EBI-880782  |
| Escherichia coli | association | intact | EBI-886932  |
| Escherichia coli | association | intact | EBI-1143023 |
| Escherichia coli | association | intact | EBI-885106  |
| Escherichia coli | association | intact | EBI-888863  |
| Escherichia coli | association | intact | EBI-1135833 |
| Escherichia coli | association | intact | EBI-892599  |
| Escherichia coli | association | intact | EBI-879887  |
| Escherichia coli | association | intact | EBI-889076  |
| Escherichia coli | association | intact | EBI-881611  |
| Escherichia coli | association | intact | EBI-879008  |
| Escherichia coli | association | intact | EBI-888239  |
| Escherichia coli | association | intact | EBI-893751  |
| Escherichia coli | association | intact | EBI-880367  |
| Escherichia coli | association | intact | EBI-886705  |
| Escherichia coli | association | intact | EBI-1136282 |
| Escherichia coli | association | intact | EBI-880430  |
| Escherichia coli | association | intact | EBI-885898  |
| Escherichia coli | association | intact | EBI-891381  |
| Escherichia coli | association | intact | EBI-1142752 |
| Escherichia coli | association | intact | EBI-878661  |
| Escherichia coli | association | intact | EBI-1143250 |

|                  |                      |        |             |
|------------------|----------------------|--------|-------------|
| Escherichia coli | association          | intact | EBI-895127  |
| Escherichia coli | association          | intact | EBI-881943  |
| Escherichia coli | association          | intact | EBI-1146766 |
| Escherichia coli | association          | intact | EBI-885288  |
| Escherichia coli | association          | intact | EBI-892010  |
| Escherichia coli | association          | intact | EBI-886413  |
| Escherichia coli | association          | intact | EBI-887115  |
| Escherichia coli | association          | intact | EBI-880906  |
| Escherichia coli | association          | intact | EBI-890918  |
| Escherichia coli | association          | intact | EBI-883733  |
| Escherichia coli | association          | intact | EBI-1145355 |
| Escherichia coli | association          | intact | EBI-889906  |
| Escherichia coli | association          | intact | EBI-882248  |
| Escherichia coli | association          | intact | EBI-889827  |
| Escherichia coli | association          | intact | EBI-1135335 |
| Escherichia coli | association          | intact | EBI-1145280 |
| Escherichia coli | association          | intact | EBI-1144266 |
| Escherichia coli | association          | intact | EBI-894652  |
| Escherichia coli | association          | intact | EBI-878894  |
| Escherichia coli | association          | intact | EBI-1137384 |
| Escherichia coli | association          | intact | EBI-1136095 |
| Escherichia coli | association          | intact | EBI-878757  |
| Escherichia coli | association          | intact | EBI-881754  |
| Escherichia coli | association          | intact | EBI-1137727 |
| Escherichia coli | association          | intact | EBI-882921  |
| Escherichia coli | association          | intact | EBI-1139033 |
| Escherichia coli | association          | intact | EBI-1140820 |
| Escherichia coli | association          | intact | EBI-1141559 |
| Escherichia coli | association          | intact | EBI-1142588 |
| Escherichia coli | association          | intact | EBI-891722  |
| Escherichia coli | association          | intact | EBI-886001  |
| Escherichia coli | association          | intact | EBI-1143583 |
| Escherichia coli | association          | intact | EBI-889915  |
| Escherichia coli | association          | intact | EBI-882643  |
| Escherichia coli | association          | intact | EBI-890114  |
| Escherichia coli | association          | intact | EBI-1136338 |
| Escherichia coli | association          | intact | EBI-1139945 |
| Escherichia coli | association          | intact | EBI-1136818 |
| Escherichia coli | association          | intact | EBI-888995  |
| Escherichia coli | association          | intact | EBI-881555  |
| Escherichia coli | physical association | intact | EBI-1146177 |
| Escherichia coli | physical association | intact | EBI-884401  |
| Escherichia coli | association          | intact | EBI-879773  |
| Escherichia coli | association          | intact | EBI-894549  |

|                  |                      |        |             |
|------------------|----------------------|--------|-------------|
| Escherichia coli | association          | intact | EBI-1147429 |
| Escherichia coli | physical association | intact | EBI-1147567 |
| Escherichia coli | association          | intact | EBI-1141251 |
| Escherichia coli | association          | intact | EBI-1137028 |
| Escherichia coli | association          | intact | EBI-1137857 |
| Escherichia coli | association          | intact | EBI-1137650 |
| Escherichia coli | physical association | intact | EBI-881328  |
| Escherichia coli | association          | intact | EBI-878610  |
| Escherichia coli | association          | intact | EBI-1146620 |
| Escherichia coli | association          | intact | EBI-1145305 |
| Escherichia coli | association          | intact | EBI-1136170 |
| Escherichia coli | association          | intact | EBI-1137925 |
| Escherichia coli | association          | intact | EBI-1135392 |
| Escherichia coli | association          | intact | EBI-1135386 |
| Escherichia coli | association          | intact | EBI-892312  |
| Escherichia coli | association          | intact | EBI-885677  |
| Escherichia coli | association          | intact | EBI-1138573 |
| Escherichia coli | association          | intact | EBI-885556  |
| Escherichia coli | association          | intact | EBI-892166  |
| Escherichia coli | association          | intact | EBI-892151  |
| Escherichia coli | association          | intact | EBI-1141171 |
| Escherichia coli | association          | intact | EBI-1141181 |
| Escherichia coli | association          | intact | EBI-1140667 |
| Escherichia coli | association          | intact | EBI-1143934 |
| Escherichia coli | association          | intact | EBI-891593  |
| Escherichia coli | physical association | intact | EBI-906951  |
| Escherichia coli | association          | intact | EBI-884584  |
| Escherichia coli | association          | intact | EBI-891405  |
| Escherichia coli | association          | intact | EBI-1136646 |
| Escherichia coli | association          | intact | EBI-1136866 |
| Escherichia coli | association          | intact | EBI-1135657 |
| Escherichia coli | association          | intact | EBI-1136296 |
| Escherichia coli | association          | intact | EBI-1136570 |
| Escherichia coli | physical association | intact | EBI-1142780 |
| Escherichia coli | association          | intact | EBI-886936  |
| Escherichia coli | association          | intact | EBI-1147250 |
| Escherichia coli | association          | intact | EBI-1136666 |
| Escherichia coli | association          | intact | EBI-893820  |
| Escherichia coli | association          | intact | EBI-888455  |
| Escherichia coli | association          | intact | EBI-1146061 |
| Escherichia coli | association          | intact | EBI-887830  |
| Escherichia coli | association          | intact | EBI-879997  |
| Escherichia coli | physical association | intact | EBI-1135751 |
| Escherichia coli | association          | intact | EBI-1138172 |
| Escherichia coli | physical association | intact | EBI-1145894 |

|                  |                      |        |             |
|------------------|----------------------|--------|-------------|
| Escherichia coli | association          | intact | EBI-1140201 |
| Escherichia coli | association          | intact | EBI-1140197 |
| Escherichia coli | association          | intact | EBI-1146392 |
| Escherichia coli | association          | intact | EBI-1147897 |
| Escherichia coli | association          | intact | EBI-883621  |
| Escherichia coli | physical association | intact | EBI-1774733 |
| Escherichia coli | physical association | intact | EBI-2115441 |
| Escherichia coli | physical association | intact | EBI-2116071 |
| Escherichia coli | physical association | intact | EBI-2271845 |
| Escherichia coli | association          | intact | EBI-890781  |
| Escherichia coli | association          | intact | EBI-1146094 |
| Escherichia coli | association          | intact | EBI-1137364 |
| Escherichia coli | association          | intact | EBI-894882  |
| Escherichia coli | association          | intact | EBI-1140328 |
| Escherichia coli | association          | intact | EBI-880413  |
| Escherichia coli | association          | intact | EBI-885840  |
| Escherichia coli | association          | intact | EBI-1137313 |
| Escherichia coli | association          | intact | EBI-1142841 |
| Escherichia coli | association          | intact | EBI-1142893 |
| Escherichia coli | association          | intact | EBI-893240  |
| Escherichia coli | physical association | intact | EBI-887268  |
| Escherichia coli | association          | intact | EBI-1147409 |
| Escherichia coli | association          | intact | EBI-1137009 |
| Escherichia coli | association          | intact | EBI-1137265 |
| Escherichia coli | association          | intact | EBI-1137252 |
| Escherichia coli | association          | intact | EBI-887368  |
| Escherichia coli | association          | intact | EBI-1135409 |
| Escherichia coli | association          | intact | EBI-1135416 |
| Escherichia coli | association          | intact | EBI-1135340 |
| Escherichia coli | association          | intact | EBI-1138778 |
| Escherichia coli | association          | intact | EBI-1138760 |
| Escherichia coli | association          | intact | EBI-1141229 |
| Escherichia coli | association          | intact | EBI-1141359 |
| Escherichia coli | association          | intact | EBI-1141433 |
| Escherichia coli | association          | intact | EBI-1141452 |
| Escherichia coli | association          | intact | EBI-1141461 |
| Escherichia coli | association          | intact | EBI-1140172 |
| Escherichia coli | association          | intact | EBI-1142533 |
| Escherichia coli | association          | intact | EBI-1137095 |
| Escherichia coli | association          | intact | EBI-1135523 |
| Escherichia coli | association          | intact | EBI-881093  |
| Escherichia coli | association          | intact | EBI-889279  |
| Escherichia coli | association          | intact | EBI-1140245 |
| Escherichia coli | association          | intact | EBI-888931  |
| Escherichia coli | association          | intact | EBI-890143  |



|                  |                      |        |             |
|------------------|----------------------|--------|-------------|
| Escherichia coli | association          | intact | EBI-1141031 |
| Escherichia coli | association          | intact | EBI-1137872 |
| Escherichia coli | association          | intact | EBI-1141898 |
| Escherichia coli | association          | intact | EBI-1141888 |
| Escherichia coli | association          | intact | EBI-880261  |
| Escherichia coli | association          | intact | EBI-885585  |
| Escherichia coli | association          | intact | EBI-1136726 |
| Escherichia coli | physical association | intact | EBI-1138077 |
| Escherichia coli | association          | intact | EBI-1138177 |
| Escherichia coli | association          | intact | EBI-1137604 |
| Escherichia coli | association          | intact | EBI-883047  |
| Escherichia coli | association          | intact | EBI-888219  |
| Escherichia coli | association          | intact | EBI-881166  |
| Escherichia coli | association          | intact | EBI-1143469 |
| Escherichia coli | association          | intact | EBI-884206  |
| Escherichia coli | association          | intact | EBI-1143195 |
| Escherichia coli | association          | intact | EBI-887624  |
| Escherichia coli | association          | intact | EBI-1138489 |
| Escherichia coli | association          | intact | EBI-880595  |
| Escherichia coli | association          | intact | EBI-888025  |
| Escherichia coli | association          | intact | EBI-1141657 |
| Escherichia coli | association          | intact | EBI-884306  |
| Escherichia coli | association          | intact | EBI-1135581 |
| Escherichia coli | association          | intact | EBI-885490  |
| Escherichia coli | association          | intact | EBI-880166  |
| Escherichia coli | association          | intact | EBI-885243  |
| Escherichia coli | association          | intact | EBI-1140965 |
| Escherichia coli | physical association | intact | EBI-1135720 |
| Escherichia coli | association          | intact | EBI-1145795 |
| Escherichia coli | association          | intact | EBI-880782  |
| Escherichia coli | association          | intact | EBI-886932  |
| Escherichia coli | association          | intact | EBI-1138525 |
| Escherichia coli | association          | intact | EBI-894820  |
| Escherichia coli | association          | intact | EBI-1140585 |
| Escherichia coli | association          | intact | EBI-1147790 |
| Escherichia coli | association          | intact | EBI-889390  |
| Escherichia coli | association          | intact | EBI-887896  |
| Escherichia coli | association          | intact | EBI-889772  |
| Escherichia coli | physical association | intact | EBI-1135373 |
| Escherichia coli | association          | intact | EBI-888863  |
| Escherichia coli | association          | intact | EBI-1140456 |
| Escherichia coli | association          | intact | EBI-894628  |
| Escherichia coli | association          | intact | EBI-1135508 |
| Escherichia coli | association          | intact | EBI-1135504 |
| Escherichia coli | association          | intact | EBI-1135498 |

|                  |                      |        |             |
|------------------|----------------------|--------|-------------|
| Escherichia coli | physical association | intact | EBI-884394  |
| Escherichia coli | association          | intact | EBI-891329  |
| Escherichia coli | association          | intact | EBI-1137482 |
| Escherichia coli | physical association | intact | EBI-889967  |
| Escherichia coli | association          | intact | EBI-1136749 |
| Escherichia coli | association          | intact | EBI-1136467 |
| Escherichia coli | association          | intact | EBI-1141763 |
| Escherichia coli | association          | intact | EBI-1136146 |
| Escherichia coli | association          | intact | EBI-1142385 |
| Escherichia coli | association          | intact | EBI-881611  |
| Escherichia coli | association          | intact | EBI-1135927 |
| Escherichia coli | physical association | intact | EBI-1135924 |
| Escherichia coli | association          | intact | EBI-882228  |
| Escherichia coli | association          | intact | EBI-1145123 |
| Escherichia coli | association          | intact | EBI-884363  |
| Escherichia coli | association          | intact | EBI-1140351 |
| Escherichia coli | association          | intact | EBI-1136026 |
| Escherichia coli | physical association | intact | EBI-884462  |
| Escherichia coli | association          | intact | EBI-888576  |
| Escherichia coli | association          | intact | EBI-1139559 |
| Escherichia coli | association          | intact | EBI-888239  |
| Escherichia coli | association          | intact | EBI-893751  |
| Escherichia coli | association          | intact | EBI-1135740 |
| Escherichia coli | association          | intact | EBI-888916  |
| Escherichia coli | association          | intact | EBI-1135536 |
| Escherichia coli | association          | intact | EBI-887579  |
| Escherichia coli | association          | intact | EBI-887719  |
| Escherichia coli | physical association | intact | EBI-1135586 |
| Escherichia coli | association          | intact | EBI-1137674 |
| Escherichia coli | association          | intact | EBI-1142158 |
| Escherichia coli | association          | intact | EBI-1142947 |
| Escherichia coli | association          | intact | EBI-889234  |
| Escherichia coli | association          | intact | EBI-1137200 |
| Escherichia coli | physical association | intact | EBI-1138188 |
| Escherichia coli | association          | intact | EBI-887873  |
| Escherichia coli | association          | intact | EBI-887021  |
| Escherichia coli | association          | intact | EBI-1145998 |
| Escherichia coli | association          | intact | EBI-1146002 |
| Escherichia coli | association          | intact | EBI-1146441 |
| Escherichia coli | association          | intact | EBI-1143635 |
| Escherichia coli | association          | intact | EBI-893969  |
| Escherichia coli | association          | intact | EBI-1142433 |
| Escherichia coli | association          | intact | EBI-1141603 |
| Escherichia coli | association          | intact | EBI-1139751 |
| Escherichia coli | association          | intact | EBI-880983  |

|                  |                      |        |             |
|------------------|----------------------|--------|-------------|
| Escherichia coli | association          | intact | EBI-1142551 |
| Escherichia coli | association          | intact | EBI-1142759 |
| Escherichia coli | association          | intact | EBI-887128  |
| Escherichia coli | association          | intact | EBI-890008  |
| Escherichia coli | physical association | intact | EBI-1136417 |
| Escherichia coli | association          | intact | EBI-1137072 |
| Escherichia coli | association          | intact | EBI-1143495 |
| Escherichia coli | association          | intact | EBI-1139979 |
| Escherichia coli | association          | intact | EBI-1147664 |
| Escherichia coli | association          | intact | EBI-880430  |
| Escherichia coli | association          | intact | EBI-880319  |
| Escherichia coli | association          | intact | EBI-885650  |
| Escherichia coli | association          | intact | EBI-1138642 |
| Escherichia coli | association          | intact | EBI-895127  |
| Escherichia coli | association          | intact | EBI-890069  |
| Escherichia coli | physical association | intact | EBI-884439  |
| Escherichia coli | association          | intact | EBI-1136475 |
| Escherichia coli | association          | intact | EBI-892291  |
| Escherichia coli | association          | intact | EBI-1136708 |
| Escherichia coli | association          | intact | EBI-1139646 |
| Escherichia coli | association          | intact | EBI-881973  |
| Escherichia coli | association          | intact | EBI-881046  |
| Escherichia coli | association          | intact | EBI-1146638 |
| Escherichia coli | association          | intact | EBI-882652  |
| Escherichia coli | association          | intact | EBI-879136  |
| Escherichia coli | association          | intact | EBI-1135919 |
| Escherichia coli | association          | intact | EBI-889451  |
| Escherichia coli | association          | intact | EBI-1140165 |
| Escherichia coli | association          | intact | EBI-1139187 |
| Escherichia coli | association          | intact | EBI-886554  |
| Escherichia coli | association          | intact | EBI-1137716 |
| Escherichia coli | association          | intact | EBI-1136918 |
| Escherichia coli | association          | intact | EBI-1136918 |
| Escherichia coli | association          | intact | EBI-1145349 |
| Escherichia coli | association          | intact | EBI-1138150 |
| Escherichia coli | physical association | intact | EBI-888955  |
| Escherichia coli | association          | intact | EBI-1147174 |
| Escherichia coli | association          | intact | EBI-1147159 |
| Escherichia coli | association          | intact | EBI-1145550 |
| Escherichia coli | physical association | intact | EBI-1142143 |
| Escherichia coli | association          | intact | EBI-1145573 |
| Escherichia coli | association          | intact | EBI-1146370 |
| Escherichia coli | association          | intact | EBI-881374  |
| Escherichia coli | association          | intact | EBI-1147681 |
| Escherichia coli | association          | intact | EBI-888473  |

|                  |                      |        |             |
|------------------|----------------------|--------|-------------|
| Escherichia coli | association          | intact | EBI-849240  |
| Escherichia coli | association          | intact | EBI-849332  |
| Escherichia coli | association          | intact | EBI-849357  |
| Escherichia coli | association          | intact | EBI-849381  |
| Escherichia coli | association          | intact | EBI-893488  |
| Escherichia coli | association          | intact | EBI-849044  |
| Escherichia coli | association          | intact | EBI-849432  |
| Escherichia coli | association          | intact | EBI-895082  |
| Escherichia coli | association          | intact | EBI-1146535 |
| Escherichia coli | association          | intact | EBI-886413  |
| Escherichia coli | association          | intact | EBI-879426  |
| Escherichia coli | association          | intact | EBI-883617  |
| Escherichia coli | association          | intact | EBI-1145951 |
| Escherichia coli | association          | intact | EBI-879445  |
| Escherichia coli | association          | intact | EBI-883645  |
| Escherichia coli | association          | intact | EBI-892838  |
| Escherichia coli | association          | intact | EBI-1147184 |
| Escherichia coli | association          | intact | EBI-879161  |
| Escherichia coli | association          | intact | EBI-1146407 |
| Escherichia coli | association          | intact | EBI-1143455 |
| Escherichia coli | association          | intact | EBI-1147655 |
| Escherichia coli | association          | intact | EBI-886442  |
| Escherichia coli | physical association | intact | EBI-890983  |
| Escherichia coli | association          | intact | EBI-1145849 |
| Escherichia coli | association          | intact | EBI-1138614 |
| Escherichia coli | association          | intact | EBI-1138605 |
| Escherichia coli | association          | intact | EBI-1141073 |
| Escherichia coli | association          | intact | EBI-887115  |
| Escherichia coli | association          | intact | EBI-880906  |
| Escherichia coli | association          | intact | EBI-1141330 |
| Escherichia coli | association          | intact | EBI-880477  |
| Escherichia coli | physical association | intact | EBI-884416  |
| Escherichia coli | association          | intact | EBI-1146171 |
| Escherichia coli | association          | intact | EBI-1135640 |
| Escherichia coli | association          | intact | EBI-887918  |
| Escherichia coli | association          | intact | EBI-885071  |
| Escherichia coli | association          | intact | EBI-891549  |
| Escherichia coli | association          | intact | EBI-884360  |
| Escherichia coli | association          | intact | EBI-1138421 |
| Escherichia coli | association          | intact | EBI-1147006 |
| Escherichia coli | association          | intact | EBI-1135459 |
| Escherichia coli | association          | intact | EBI-883462  |
| Escherichia coli | association          | intact | EBI-884548  |
| Escherichia coli | association          | intact | EBI-885248  |
| Escherichia coli | association          | intact | EBI-891999  |

|                  |                      |        |             |
|------------------|----------------------|--------|-------------|
| Escherichia coli | association          | intact | EBI-1136733 |
| Escherichia coli | association          | intact | EBI-1136301 |
| Escherichia coli | association          | intact | EBI-1135489 |
| Escherichia coli | association          | intact | EBI-1147205 |
| Escherichia coli | association          | intact | EBI-885691  |
| Escherichia coli | physical association | intact | EBI-878854  |
| Escherichia coli | association          | intact | EBI-879853  |
| Escherichia coli | association          | intact | EBI-1146067 |
| Escherichia coli | association          | intact | EBI-1147746 |
| Escherichia coli | association          | intact | EBI-882273  |
| Escherichia coli | association          | intact | EBI-1139361 |
| Escherichia coli | association          | intact | EBI-1146759 |
| Escherichia coli | association          | intact | EBI-1142262 |
| Escherichia coli | physical association | intact | EBI-1145925 |
| Escherichia coli | physical association | intact | EBI-1147649 |
| Escherichia coli | association          | intact | EBI-889746  |
| Escherichia coli | association          | intact | EBI-1136836 |
| Escherichia coli | association          | intact | EBI-1139703 |
| Escherichia coli | association          | intact | EBI-878894  |
| Escherichia coli | association          | intact | EBI-1137384 |
| Escherichia coli | association          | intact | EBI-1147356 |
| Escherichia coli | association          | intact | EBI-1144798 |
| Escherichia coli | association          | intact | EBI-1141500 |
| Escherichia coli | association          | intact | EBI-1139002 |
| Escherichia coli | association          | intact | EBI-1136374 |
| Escherichia coli | association          | intact | EBI-1141735 |
| Escherichia coli | association          | intact | EBI-1146690 |
| Escherichia coli | association          | intact | EBI-894844  |
| Escherichia coli | association          | intact | EBI-1146156 |
| Escherichia coli | association          | intact | EBI-1147801 |
| Escherichia coli | association          | intact | EBI-1136044 |
| Escherichia coli | association          | intact | EBI-1136071 |
| Escherichia coli | association          | intact | EBI-1136079 |
| Escherichia coli | association          | intact | EBI-1136090 |
| Escherichia coli | association          | intact | EBI-1136101 |
| Escherichia coli | association          | intact | EBI-1136109 |
| Escherichia coli | association          | intact | EBI-1136117 |
| Escherichia coli | association          | intact | EBI-1136127 |
| Escherichia coli | association          | intact | EBI-1136211 |
| Escherichia coli | association          | intact | EBI-1136218 |
| Escherichia coli | association          | intact | EBI-1136242 |
| Escherichia coli | association          | intact | EBI-1136487 |
| Escherichia coli | association          | intact | EBI-1136717 |
| Escherichia coli | association          | intact | EBI-1136842 |
| Escherichia coli | association          | intact | EBI-1136849 |

|                  |                      |        |             |
|------------------|----------------------|--------|-------------|
| Escherichia coli | association          | intact | EBI-1136740 |
| Escherichia coli | association          | intact | EBI-1136902 |
| Escherichia coli | association          | intact | EBI-1137323 |
| Escherichia coli | association          | intact | EBI-1137330 |
| Escherichia coli | association          | intact | EBI-1137403 |
| Escherichia coli | association          | intact | EBI-1137770 |
| Escherichia coli | association          | intact | EBI-1137783 |
| Escherichia coli | association          | intact | EBI-1137911 |
| Escherichia coli | association          | intact | EBI-1138038 |
| Escherichia coli | association          | intact | EBI-1138006 |
| Escherichia coli | association          | intact | EBI-1138097 |
| Escherichia coli | association          | intact | EBI-1138657 |
| Escherichia coli | association          | intact | EBI-1138650 |
| Escherichia coli | association          | intact | EBI-882901  |
| Escherichia coli | association          | intact | EBI-1138713 |
| Escherichia coli | physical association | intact | EBI-1139086 |
| Escherichia coli | association          | intact | EBI-1139089 |
| Escherichia coli | association          | intact | EBI-1139137 |
| Escherichia coli | association          | intact | EBI-1139033 |
| Escherichia coli | association          | intact | EBI-1139284 |
| Escherichia coli | association          | intact | EBI-1139450 |
| Escherichia coli | association          | intact | EBI-1139674 |
| Escherichia coli | association          | intact | EBI-1139780 |
| Escherichia coli | association          | intact | EBI-1139824 |
| Escherichia coli | association          | intact | EBI-1139997 |
| Escherichia coli | association          | intact | EBI-1140191 |
| Escherichia coli | association          | intact | EBI-1140414 |
| Escherichia coli | physical association | intact | EBI-893871  |
| Escherichia coli | association          | intact | EBI-883851  |
| Escherichia coli | association          | intact | EBI-1140602 |
| Escherichia coli | association          | intact | EBI-1140722 |
| Escherichia coli | association          | intact | EBI-1140746 |
| Escherichia coli | association          | intact | EBI-1140770 |
| Escherichia coli | association          | intact | EBI-1140947 |
| Escherichia coli | association          | intact | EBI-1141389 |
| Escherichia coli | association          | intact | EBI-1141414 |
| Escherichia coli | association          | intact | EBI-1141527 |
| Escherichia coli | association          | intact | EBI-1141618 |
| Escherichia coli | association          | intact | EBI-1141970 |
| Escherichia coli | association          | intact | EBI-1142121 |
| Escherichia coli | association          | intact | EBI-887063  |
| Escherichia coli | association          | intact | EBI-1142494 |
| Escherichia coli | association          | intact | EBI-1143500 |
| Escherichia coli | association          | intact | EBI-893852  |
| Escherichia coli | association          | intact | EBI-1143838 |

|                  |                      |        |             |
|------------------|----------------------|--------|-------------|
| Escherichia coli | association          | intact | EBI-891354  |
| Escherichia coli | physical association | intact | EBI-1143900 |
| Escherichia coli | physical association | intact | EBI-1144146 |
| Escherichia coli | association          | intact | EBI-890430  |
| Escherichia coli | association          | intact | EBI-1144492 |
| Escherichia coli | association          | intact | EBI-1145298 |
| Escherichia coli | physical association | intact | EBI-1145401 |
| Escherichia coli | physical association | intact | EBI-1145905 |
| Escherichia coli | association          | intact | EBI-1146086 |
| Escherichia coli | association          | intact | EBI-1146192 |
| Escherichia coli | association          | intact | EBI-886001  |
| Escherichia coli | association          | intact | EBI-887477  |
| Escherichia coli | association          | intact | EBI-1146499 |
| Escherichia coli | association          | intact | EBI-1146467 |
| Escherichia coli | association          | intact | EBI-887888  |
| Escherichia coli | association          | intact | EBI-1147381 |
| Escherichia coli | association          | intact | EBI-1147464 |
| Escherichia coli | association          | intact | EBI-891042  |
| Escherichia coli | physical association | intact | EBI-881911  |
| Escherichia coli | association          | intact | EBI-1139670 |
| Escherichia coli | association          | intact | EBI-890159  |
| Escherichia coli | association          | intact | EBI-1144912 |

|                  |                      |        |             |
|------------------|----------------------|--------|-------------|
| Escherichia coli | association          | intact | EBI-882643  |
| Escherichia coli | association          | intact | EBI-879694  |
| Escherichia coli | association          | intact | EBI-879628  |
| Escherichia coli | association          | intact | EBI-879589  |
| Escherichia coli | association          | intact | EBI-887392  |
| Escherichia coli | association          | intact | EBI-888637  |
| Escherichia coli | physical association | intact | EBI-2370582 |
| Escherichia coli | physical association | intact | EBI-886331  |
| Escherichia coli | association          | intact | EBI-888025  |
| Escherichia coli | physical association | intact | EBI-2434543 |
| Escherichia coli | direct interaction   | intact | EBI-2434614 |
| Escherichia coli | association          | intact | EBI-889390  |
| Escherichia coli | association          | intact | EBI-882847  |
| Escherichia coli | association          | intact | EBI-889234  |
| Escherichia coli | association          | intact | EBI-888834  |
| Escherichia coli | physical association | intact | EBI-886378  |
| Escherichia coli | association          | intact | EBI-892838  |
| Escherichia coli | association          | intact | EBI-888737  |
| Escherichia coli | physical association | intact | EBI-885832  |
| Escherichia coli | physical association | intact | EBI-879880  |

|                  |                      |        |             |
|------------------|----------------------|--------|-------------|
| Escherichia coli | association          | intact | EBI-883851  |
| Escherichia coli | association          | intact | EBI-890179  |
| Escherichia coli | association          | intact | EBI-890430  |
| Escherichia coli | association          | intact | EBI-1138768 |
| Escherichia coli | association          | intact | EBI-1141725 |
| Escherichia coli | association          | intact | EBI-1143152 |
| Escherichia coli | association          | intact | EBI-1139067 |
| Escherichia coli | association          | intact | EBI-887434  |
| Escherichia coli | association          | intact | EBI-881374  |
| Escherichia coli | association          | intact | EBI-1140480 |
| Escherichia coli | association          | intact | EBI-890346  |
| Escherichia coli | association          | intact | EBI-895275  |
| Escherichia coli | association          | intact | EBI-1141314 |
| Escherichia coli | association          | intact | EBI-1142416 |
| Escherichia coli | association          | intact | EBI-1142963 |
| Escherichia coli | association          | intact | EBI-1143181 |
| Escherichia coli | physical association | intact | EBI-1029868 |
| Escherichia coli | association          | intact | EBI-1146950 |
| Escherichia coli | association          | intact | EBI-1140837 |
| Escherichia coli | association          | intact | EBI-1140845 |
| Escherichia coli | association          | intact | EBI-1139945 |
| Escherichia coli | association          | intact | EBI-1147722 |
| Escherichia coli | association          | intact | EBI-885556  |
| Escherichia coli | association          | intact | EBI-1139965 |
| Escherichia coli | association          | intact | EBI-889279  |
| Escherichia coli | association          | intact | EBI-880782  |
| Escherichia coli | association          | intact | EBI-1143661 |
| Escherichia coli | association          | intact | EBI-888239  |
| Escherichia coli | association          | intact | EBI-1141045 |
| Escherichia coli | association          | intact | EBI-887719  |
| Escherichia coli | association          | intact | EBI-887434  |
| Escherichia coli | association          | intact | EBI-1147263 |
| Escherichia coli | association          | intact | EBI-1139510 |
| Escherichia coli | association          | intact | EBI-895127  |
| Escherichia coli | association          | intact | EBI-1140409 |
| Escherichia coli | association          | intact | EBI-881374  |



|                  |                      |        |             |
|------------------|----------------------|--------|-------------|
| Escherichia coli | association          | intact | EBI-885288  |
| Escherichia coli | association          | intact | EBI-1139475 |
| Escherichia coli | association          | intact | EBI-1135887 |
| Escherichia coli | association          | intact | EBI-886442  |
| Escherichia coli | association          | intact | EBI-890346  |
| Escherichia coli | association          | intact | EBI-369356  |
| Escherichia coli | association          | intact | EBI-371168  |
| Escherichia coli | physical association | intact | EBI-1135301 |
| Escherichia coli | association          | intact | EBI-1139361 |
| Escherichia coli | association          | intact | EBI-1140280 |
| Escherichia coli | association          | intact | EBI-1140414 |

|                  |             |        |            |
|------------------|-------------|--------|------------|
| Escherichia coli | association | intact | EBI-369356 |
|------------------|-------------|--------|------------|

|                  |                      |        |             |
|------------------|----------------------|--------|-------------|
| Escherichia coli | physical association | intact | EBI-906856  |
| Escherichia coli | physical association | intact | EBI-1770950 |
| Escherichia coli | association          | intact | EBI-894882  |
| Escherichia coli | association          | intact | EBI-889981  |
| Escherichia coli | association          | intact | EBI-1145593 |
| Escherichia coli | association          | intact | EBI-1145593 |
| Escherichia coli | association          | intact | EBI-1146860 |
| Escherichia coli | association          | intact | EBI-1135778 |
| Escherichia coli | association          | intact | EBI-369356  |

|                  |                      |        |            |
|------------------|----------------------|--------|------------|
| Escherichia coli | physical association | intact | EBI-881124 |
| Escherichia coli | association          | intact | EBI-885677 |
| Escherichia coli | association          | intact | EBI-888051 |
| Escherichia coli | association          | intact | EBI-892208 |
| Escherichia coli | association          | intact | EBI-884758 |
| Escherichia coli | association          | intact | EBI-884811 |
| Escherichia coli | association          | intact | EBI-884584 |
| Escherichia coli | association          | intact | EBI-891481 |
| Escherichia coli | association          | intact | EBI-884518 |
| Escherichia coli | association          | intact | EBI-880959 |
| Escherichia coli | physical association | intact | EBI-881591 |
| Escherichia coli | association          | intact | EBI-883418 |
| Escherichia coli | association          | intact | EBI-890751 |
| Escherichia coli | association          | intact | EBI-885640 |
| Escherichia coli | association          | intact | EBI-883621 |
| Escherichia coli | association          | intact | EBI-890853 |
| Escherichia coli | association          | intact | EBI-883577 |
| Escherichia coli | association          | intact | EBI-880291 |
| Escherichia coli | physical association | intact | EBI-906856 |

|                  |                      |        |             |
|------------------|----------------------|--------|-------------|
| Escherichia coli | association          | intact | EBI-887996  |
| Escherichia coli | physical association | intact | EBI-1770950 |
| Escherichia coli | direct interaction   | intact | EBI-301213  |
| Escherichia coli | physical association | intact | EBI-906617  |
| Escherichia coli | association          | intact | EBI-887539  |
| Escherichia coli | physical association | intact | EBI-880968  |
| Escherichia coli | association          | intact | EBI-880067  |
| Escherichia coli | association          | intact | EBI-887293  |
| Escherichia coli | association          | intact | EBI-887148  |
| Escherichia coli | association          | intact | EBI-884342  |
| Escherichia coli | association          | intact | EBI-879752  |
| Escherichia coli | association          | intact | EBI-889721  |
| Escherichia coli | association          | intact | EBI-888109  |
| Escherichia coli | association          | intact | EBI-881093  |
| Escherichia coli | association          | intact | EBI-881078  |
| Escherichia coli | association          | intact | EBI-889279  |
| Escherichia coli | association          | intact | EBI-880261  |
| Escherichia coli | association          | intact | EBI-885585  |
| Escherichia coli | association          | intact | EBI-885224  |
| Escherichia coli | association          | intact | EBI-888671  |
| Escherichia coli | association          | intact | EBI-883047  |
| Escherichia coli | association          | intact | EBI-888219  |
| Escherichia coli | association          | intact | EBI-884206  |
| Escherichia coli | association          | intact | EBI-891237  |
| Escherichia coli | association          | intact | EBI-891214  |
| Escherichia coli | association          | intact | EBI-884130  |
| Escherichia coli | association          | intact | EBI-887624  |
| Escherichia coli | physical association | intact | EBI-880994  |
| Escherichia coli | association          | intact | EBI-880595  |
| Escherichia coli | association          | intact | EBI-888025  |
| Escherichia coli | association          | intact | EBI-880105  |
| Escherichia coli | association          | intact | EBI-884859  |
| Escherichia coli | association          | intact | EBI-889252  |
| Escherichia coli | association          | intact | EBI-894305  |
| Escherichia coli | association          | intact | EBI-888653  |
| Escherichia coli | physical association | intact | EBI-881279  |
| Escherichia coli | association          | intact | EBI-880782  |
| Escherichia coli | association          | intact | EBI-886932  |
| Escherichia coli | association          | intact | EBI-880750  |
| Escherichia coli | association          | intact | EBI-885026  |
| Escherichia coli | association          | intact | EBI-891881  |
| Escherichia coli | association          | intact | EBI-880023  |
| Escherichia coli | association          | intact | EBI-885106  |
| Escherichia coli | association          | intact | EBI-880082  |
| Escherichia coli | association          | intact | EBI-888615  |

|                  |                      |        |            |
|------------------|----------------------|--------|------------|
| Escherichia coli | association          | intact | EBI-889390 |
| Escherichia coli | association          | intact | EBI-888757 |
| Escherichia coli | association          | intact | EBI-881294 |
| Escherichia coli | physical association | intact | EBI-881333 |
| Escherichia coli | association          | intact | EBI-894148 |
| Escherichia coli | association          | intact | EBI-882847 |
| Escherichia coli | association          | intact | EBI-889577 |
| Escherichia coli | association          | intact | EBI-892581 |
| Escherichia coli | physical association | intact | EBI-886035 |
| Escherichia coli | association          | intact | EBI-879887 |
| Escherichia coli | association          | intact | EBI-889363 |
| Escherichia coli | association          | intact | EBI-882543 |
| Escherichia coli | association          | intact | EBI-889076 |
| Escherichia coli | association          | intact | EBI-881611 |
| Escherichia coli | physical association | intact | EBI-879029 |
| Escherichia coli | association          | intact | EBI-882228 |
| Escherichia coli | association          | intact | EBI-879008 |
| Escherichia coli | association          | intact | EBI-884363 |
| Escherichia coli | association          | intact | EBI-887041 |
| Escherichia coli | association          | intact | EBI-882483 |
| Escherichia coli | association          | intact | EBI-888239 |
| Escherichia coli | association          | intact | EBI-893751 |
| Escherichia coli | association          | intact | EBI-889622 |
| Escherichia coli | association          | intact | EBI-894594 |
| Escherichia coli | association          | intact | EBI-888887 |
| Escherichia coli | association          | intact | EBI-894052 |
| Escherichia coli | association          | intact | EBI-888916 |
| Escherichia coli | physical association | intact | EBI-888865 |
| Escherichia coli | physical association | intact | EBI-880976 |
| Escherichia coli | physical association | intact | EBI-886447 |
| Escherichia coli | association          | intact | EBI-880367 |
| Escherichia coli | association          | intact | EBI-880342 |
| Escherichia coli | physical association | intact | EBI-893211 |
| Escherichia coli | association          | intact | EBI-887021 |
| Escherichia coli | association          | intact | EBI-879814 |
| Escherichia coli | physical association | intact | EBI-883785 |
| Escherichia coli | association          | intact | EBI-886823 |
| Escherichia coli | association          | intact | EBI-887434 |
| Escherichia coli | association          | intact | EBI-884968 |
| Escherichia coli | association          | intact | EBI-887088 |
| Escherichia coli | physical association | intact | EBI-884556 |
| Escherichia coli | association          | intact | EBI-878876 |
| Escherichia coli | association          | intact | EBI-878661 |
| Escherichia coli | association          | intact | EBI-878620 |
| Escherichia coli | association          | intact | EBI-880387 |

|                  |                      |        |            |
|------------------|----------------------|--------|------------|
| Escherichia coli | association          | intact | EBI-895127 |
| Escherichia coli | association          | intact | EBI-892291 |
| Escherichia coli | physical association | intact | EBI-885625 |
| Escherichia coli | association          | intact | EBI-881046 |
| Escherichia coli | association          | intact | EBI-879136 |
| Escherichia coli | association          | intact | EBI-881943 |
| Escherichia coli | association          | intact | EBI-886554 |
| Escherichia coli | physical association | intact | EBI-884347 |
| Escherichia coli | association          | intact | EBI-889159 |
| Escherichia coli | association          | intact | EBI-881132 |
| Escherichia coli | association          | intact | EBI-885288 |
| Escherichia coli | association          | intact | EBI-892010 |
| Escherichia coli | association          | intact | EBI-888473 |
| Escherichia coli | association          | intact | EBI-886413 |
| Escherichia coli | association          | intact | EBI-879304 |
| Escherichia coli | association          | intact | EBI-892741 |
| Escherichia coli | association          | intact | EBI-879117 |
| Escherichia coli | association          | intact | EBI-886442 |
| Escherichia coli | physical association | intact | EBI-883806 |
| Escherichia coli | association          | intact | EBI-887115 |
| Escherichia coli | association          | intact | EBI-880477 |
| Escherichia coli | association          | intact | EBI-886105 |
| Escherichia coli | association          | intact | EBI-880676 |
| Escherichia coli | association          | intact | EBI-889906 |
| Escherichia coli | association          | intact | EBI-879764 |
| Escherichia coli | association          | intact | EBI-883462 |
| Escherichia coli | association          | intact | EBI-882248 |
| Escherichia coli | physical association | intact | EBI-889355 |
| Escherichia coli | association          | intact | EBI-886684 |
| Escherichia coli | association          | intact | EBI-883201 |
| Escherichia coli | association          | intact | EBI-894652 |
| Escherichia coli | association          | intact | EBI-889746 |
| Escherichia coli | association          | intact | EBI-879802 |
| Escherichia coli | association          | intact | EBI-884632 |
| Escherichia coli | association          | intact | EBI-878894 |
| Escherichia coli | association          | intact | EBI-880857 |
| Escherichia coli | association          | intact | EBI-881016 |
| Escherichia coli | physical association | intact | EBI-887698 |
| Escherichia coli | association          | intact | EBI-882921 |
| Escherichia coli | association          | intact | EBI-879208 |
| Escherichia coli | physical association | intact | EBI-887978 |
| Escherichia coli | association          | intact | EBI-883545 |
| Escherichia coli | association          | intact | EBI-880468 |
| Escherichia coli | association          | intact | EBI-881002 |
| Escherichia coli | association          | intact | EBI-890196 |

|                  |                      |        |            |
|------------------|----------------------|--------|------------|
| Escherichia coli | association          | intact | EBI-881026 |
| Escherichia coli | physical association | intact | EBI-887813 |
| Escherichia coli | association          | intact | EBI-891722 |
| Escherichia coli | association          | intact | EBI-893852 |
| Escherichia coli | association          | intact | EBI-888778 |
| Escherichia coli | association          | intact | EBI-881782 |
| Escherichia coli | association          | intact | EBI-881807 |
| Escherichia coli | physical association | intact | EBI-885506 |
| Escherichia coli | association          | intact | EBI-892134 |
| Escherichia coli | association          | intact | EBI-886001 |
| Escherichia coli | association          | intact | EBI-887477 |
| Escherichia coli | physical association | intact | EBI-878813 |
| Escherichia coli | association          | intact | EBI-879036 |
| Escherichia coli | association          | intact | EBI-890159 |

|                  |                      |        |            |
|------------------|----------------------|--------|------------|
| Escherichia coli | physical association | intact | EBI-894490 |
| Escherichia coli | association          | intact | EBI-892010 |
| Escherichia coli | association          | intact | EBI-884360 |
| Escherichia coli | association          | intact | EBI-895107 |
| Escherichia coli | association          | intact | EBI-882523 |

|                  |             |        |            |
|------------------|-------------|--------|------------|
| Escherichia coli | association | intact | EBI-883908 |
| Escherichia coli | association | intact | EBI-880595 |
| Escherichia coli | association | intact | EBI-885106 |
| Escherichia coli | association | intact | EBI-890008 |
| Escherichia coli | association | intact | EBI-891089 |
| Escherichia coli | association | intact | EBI-883913 |
| Escherichia coli | association | intact | EBI-892949 |
| Escherichia coli | association | intact | EBI-886554 |
| Escherichia coli | association | intact | EBI-888473 |
| Escherichia coli | association | intact | EBI-849240 |
| Escherichia coli | association | intact | EBI-849332 |
| Escherichia coli | association | intact | EBI-849357 |
| Escherichia coli | association | intact | EBI-849381 |
| Escherichia coli | association | intact | EBI-849407 |
| Escherichia coli | association | intact | EBI-893488 |
| Escherichia coli | association | intact | EBI-849432 |

|                  |                      |        |             |
|------------------|----------------------|--------|-------------|
| Escherichia coli | association          | intact | EBI-849464  |
| Escherichia coli | physical association | intact | EBI-1169624 |
| Escherichia coli | association          | intact | EBI-895082  |
| Escherichia coli | association          | intact | EBI-892838  |
| Escherichia coli | association          | intact | EBI-890346  |
| Escherichia coli | association          | intact | EBI-895275  |
| Escherichia coli | association          | intact | EBI-884548  |
| Escherichia coli | association          | intact | EBI-369356  |
| Escherichia coli | association          | intact | EBI-371168  |
| Escherichia coli | association          | intact | EBI-881754  |

|                  |             |        |             |
|------------------|-------------|--------|-------------|
| Escherichia coli | association | intact | EBI-889772  |
| Escherichia coli | association | intact | EBI-1142937 |

|                  |             |        |             |
|------------------|-------------|--------|-------------|
| Escherichia coli | association | intact | EBI-369356  |
| Escherichia coli | association | intact | EBI-369356  |
| Escherichia coli | association | intact | EBI-2463360 |
| Escherichia coli | association | intact | EBI-1142232 |

|                  |             |        |            |
|------------------|-------------|--------|------------|
| Escherichia coli | association | intact | EBI-852941 |
| Escherichia coli | association | intact | EBI-878935 |
| Escherichia coli | association | intact | EBI-890853 |

|                  |             |        |             |
|------------------|-------------|--------|-------------|
| Escherichia coli | association | intact | EBI-1136874 |
|------------------|-------------|--------|-------------|

|                  |             |        |             |
|------------------|-------------|--------|-------------|
| Escherichia coli | association | intact | EBI-882138  |
| Escherichia coli | association | intact | EBI-852941  |
| Escherichia coli | association | intact | EBI-878935  |
| Escherichia coli | association | intact | EBI-1138862 |
| Escherichia coli | association | intact | EBI-1142052 |

|                  |             |        |            |
|------------------|-------------|--------|------------|
| Escherichia coli | association | intact | EBI-882138 |
| Escherichia coli | association | intact | EBI-878935 |
| Escherichia coli | association | intact | EBI-369356 |

|                  |             |        |            |
|------------------|-------------|--------|------------|
| Escherichia coli | association | intact | EBI-878935 |
| Escherichia coli | association | intact | EBI-887087 |

|                  |             |        |             |
|------------------|-------------|--------|-------------|
| Escherichia coli | association | intact | EBI-1144574 |
| Escherichia coli | association | intact | EBI-369356  |
| Escherichia coli | association | intact | EBI-1139331 |

|                  |                      |        |             |
|------------------|----------------------|--------|-------------|
| Escherichia coli | association          | intact | EBI-1139466 |
| Escherichia coli | association          | intact | EBI-878935  |
| Escherichia coli | association          | intact | EBI-885677  |
| Escherichia coli | association          | intact | EBI-880413  |
| Escherichia coli | association          | intact | EBI-1141888 |
| Escherichia coli | association          | intact | EBI-1143736 |
| Escherichia coli | association          | intact | EBI-887500  |
| Escherichia coli | association          | intact | EBI-888473  |
| Escherichia coli | association          | intact | EBI-369356  |
| Escherichia coli | association          | intact | EBI-1141559 |
| Escherichia coli | association          | intact | EBI-1137163 |
| Escherichia coli | association          | intact | EBI-1147019 |
| Escherichia coli | association          | intact | EBI-884342  |
| Escherichia coli | association          | intact | EBI-879752  |
| Escherichia coli | association          | intact | EBI-1147023 |
| Escherichia coli | association          | intact | EBI-1139308 |
| Escherichia coli | association          | intact | EBI-1136539 |
| Escherichia coli | physical association | intact | EBI-906665  |
| Escherichia coli | association          | intact | EBI-1141366 |
| Escherichia coli | association          | intact | EBI-1137840 |
| Escherichia coli | association          | intact | EBI-1139772 |
| Escherichia coli | association          | intact | EBI-1138445 |
| Escherichia coli | association          | intact | EBI-1136056 |
| Escherichia coli | association          | intact | EBI-1139235 |
| Escherichia coli | association          | intact | EBI-1139892 |
| Escherichia coli | association          | intact | EBI-882505  |
| Escherichia coli | association          | intact | EBI-1146889 |
| Escherichia coli | association          | intact | EBI-1137983 |
| Escherichia coli | association          | intact | EBI-1139950 |
| Escherichia coli | association          | intact | EBI-1146793 |
| Escherichia coli | association          | intact | EBI-369356  |
| Escherichia coli | physical association | intact | EBI-1146753 |
| Escherichia coli | association          | intact | EBI-1139892 |

|                  |                      |        |             |
|------------------|----------------------|--------|-------------|
| Escherichia coli | physical association | intact | EBI-767046  |
| Escherichia coli | physical association | intact | EBI-767059  |
| Escherichia coli | physical association | intact | EBI-2370615 |
| Escherichia coli | association          | intact | EBI-893152  |
| Escherichia coli | association          | intact | EBI-1137454 |
| Escherichia coli | association          | intact | EBI-1144720 |
| Escherichia coli | association          | intact | EBI-1141940 |
| Escherichia coli | association          | intact | EBI-1785808 |
| Escherichia coli | physical association | intact | EBI-1785905 |
| Escherichia coli | physical association | intact | EBI-2679321 |
| Escherichia coli | association          | intact | EBI-1785808 |
| Escherichia coli | physical association | intact | EBI-1785905 |
| Escherichia coli | physical association | intact | EBI-2679321 |
| Escherichia coli | direct interaction   | intact | EBI-1033486 |
| Escherichia coli | direct interaction   | intact | EBI-1033496 |
| Escherichia coli | direct interaction   | intact | EBI-1028030 |
| Escherichia coli | association          | intact | EBI-1785808 |
| Escherichia coli | physical association | intact | EBI-1785905 |
| Escherichia coli | physical association | intact | EBI-2679321 |
| Escherichia coli | association          | intact | EBI-884415  |
| Escherichia coli | association          | intact | EBI-892889  |
| Escherichia coli | association          | intact | EBI-888366  |
| Escherichia coli | physical association | intact | EBI-1144960 |
| Escherichia coli | association          | intact | EBI-1146417 |
| Escherichia coli | association          | intact | EBI-1142406 |
| Escherichia coli | association          | intact | EBI-1143843 |
| Escherichia coli | association          | intact | EBI-369356  |
| Escherichia coli | association          | intact | EBI-879773  |
| Escherichia coli | association          | intact | EBI-1136626 |
| Escherichia coli | physical association | intact | EBI-2369602 |



|                  |                      |        |             |
|------------------|----------------------|--------|-------------|
| Escherichia coli | association          | intact | EBI-1136554 |
| Escherichia coli | association          | intact | EBI-1135340 |
| Escherichia coli | association          | intact | EBI-1145639 |
| Escherichia coli | association          | intact | EBI-1137140 |
| Escherichia coli | association          | intact | EBI-1144330 |
| Escherichia coli | physical association | intact | EBI-2369806 |
| Escherichia coli | physical association | intact | EBI-2370148 |
| Escherichia coli | physical association | intact | EBI-2012013 |
| Escherichia coli | physical association | intact | EBI-2370398 |
| Escherichia coli | physical association | intact | EBI-2370445 |
| Escherichia coli | physical association | intact | EBI-2370448 |
| Escherichia coli | physical association | intact | EBI-2370404 |
| Escherichia coli | physical association | intact | EBI-2370475 |
| Escherichia coli | physical association | intact | EBI-2369436 |
| Escherichia coli | physical association | intact | EBI-2370401 |
| Escherichia coli | association          | intact | EBI-1140692 |
| Escherichia coli | physical association | intact | EBI-2370087 |
| Escherichia coli | physical association | intact | EBI-2370096 |
| Escherichia coli | physical association | intact | EBI-2369991 |
| Escherichia coli | physical association | intact | EBI-2370054 |
| Escherichia coli | physical association | intact | EBI-2370063 |
| Escherichia coli | physical association | intact | EBI-2370060 |
| Escherichia coli | physical association | intact | EBI-2370066 |
| Escherichia coli | association          | intact | EBI-1135932 |
| Escherichia coli | association          | intact | EBI-1143130 |
| Escherichia coli | physical association | intact | EBI-2370093 |
| Escherichia coli | association          | intact | EBI-1136591 |
| Escherichia coli | association          | intact | EBI-1145259 |
| Escherichia coli | association          | intact | EBI-1145434 |
| Escherichia coli | association          | intact | EBI-1144351 |
| Escherichia coli | association          | intact | EBI-1144435 |
| Escherichia coli | association          | intact | EBI-1139399 |
| Escherichia coli | association          | intact | EBI-1138751 |
| Escherichia coli | association          | intact | EBI-1141802 |
| Escherichia coli | physical association | intact | EBI-906749  |
| Escherichia coli | association          | intact | EBI-881046  |

|                  |                      |        |             |
|------------------|----------------------|--------|-------------|
| Escherichia coli | physical association | intact | EBI-1032969 |
| Escherichia coli | physical association | intact | EBI-1032986 |
| Escherichia coli | physical association | intact | EBI-1033003 |
| Escherichia coli | physical association | intact | EBI-1212123 |
| Escherichia coli | association          | intact | EBI-1212182 |
| Escherichia coli | physical association | intact | EBI-1212202 |
| Escherichia coli | association          | intact | EBI-1146797 |
| Escherichia coli | association          | intact | EBI-1146741 |
| Escherichia coli | association          | intact | EBI-1136313 |
| Escherichia coli | association          | intact | EBI-1146806 |
| Escherichia coli | association          | intact | EBI-1146766 |
| Escherichia coli | association          | intact | EBI-1146877 |
| Escherichia coli | association          | intact | EBI-887783  |
| Escherichia coli | association          | intact | EBI-891381  |
| Escherichia coli | association          | intact | EBI-1135700 |
| Escherichia coli | association          | intact | EBI-2463360 |
| Escherichia coli | association          | intact | EBI-1143946 |
| Escherichia coli | association          | intact | EBI-889279  |
| Escherichia coli | association          | intact | EBI-1140245 |
| Escherichia coli | association          | intact | EBI-1147184 |
| Escherichia coli | association          | intact | EBI-892986  |
| Escherichia coli | association          | intact | EBI-1143817 |
| Escherichia coli | physical association | intact | EBI-1214217 |
| Escherichia coli | physical association | intact | EBI-1215076 |
| Escherichia coli | physical association | intact | EBI-1215168 |
| Escherichia coli | physical association | intact | EBI-1214924 |
| Escherichia coli | physical association | intact | EBI-1214292 |
| Escherichia coli | physical association | intact | EBI-1214359 |
| Escherichia coli | physical association | intact | EBI-1214494 |
| Escherichia coli | physical association | intact | EBI-1214554 |
| Escherichia coli | physical association | intact | EBI-1214607 |
| Escherichia coli | physical association | intact | EBI-1214585 |
| Escherichia coli | physical association | intact | EBI-1214865 |

|                  |                      |        |             |
|------------------|----------------------|--------|-------------|
| Escherichia coli | association          | intact | EBI-1137410 |
| Escherichia coli | association          | intact | EBI-1144330 |
| Escherichia coli | association          | intact | EBI-1146605 |
| Escherichia coli | association          | intact | EBI-1139399 |
| Escherichia coli | association          | intact | EBI-1141181 |
| Escherichia coli | association          | intact | EBI-1141189 |
| Escherichia coli | association          | intact | EBI-1136570 |
| Escherichia coli | association          | intact | EBI-1140853 |
| Escherichia coli | association          | intact | EBI-1137265 |
| Escherichia coli | physical association | intact | EBI-2504367 |
| Escherichia coli | association          | intact | EBI-1138177 |
| Escherichia coli | association          | intact | EBI-884206  |
| Escherichia coli | association          | intact | EBI-880782  |
| Escherichia coli | association          | intact | EBI-880023  |
| Escherichia coli | association          | intact | EBI-887853  |
| Escherichia coli | association          | intact | EBI-1137807 |
| Escherichia coli | association          | intact | EBI-371168  |
| Escherichia coli | physical association | intact | EBI-1145180 |
| Escherichia coli | association          | intact | EBI-1145897 |
| Escherichia coli | physical association | intact | EBI-2012032 |
| Escherichia coli | association          | intact | EBI-881046  |
| Escherichia coli | association          | intact | EBI-890751  |
| Escherichia coli | association          | intact | EBI-1147496 |
| Escherichia coli | association          | intact | EBI-886364  |
| Escherichia coli | association          | intact | EBI-1139836 |
| Escherichia coli | association          | intact | EBI-1141216 |
| Escherichia coli | association          | intact | EBI-1141171 |
| Escherichia coli | association          | intact | EBI-1140259 |
| Escherichia coli | association          | intact | EBI-1135494 |
| Escherichia coli | association          | intact | EBI-1142177 |
| Escherichia coli | association          | intact | EBI-1142466 |
| Escherichia coli | association          | intact | EBI-1142195 |
| Escherichia coli | association          | intact | EBI-1135667 |
| Escherichia coli | association          | intact | EBI-1140631 |
| Escherichia coli | association          | intact | EBI-1135657 |
| Escherichia coli | association          | intact | EBI-1143817 |
| Escherichia coli | association          | intact | EBI-1138046 |
| Escherichia coli | association          | intact | EBI-1142879 |
| Escherichia coli | association          | intact | EBI-1146586 |
| Escherichia coli | association          | intact | EBI-1140371 |

|                  |                      |        |             |
|------------------|----------------------|--------|-------------|
| Escherichia coli | association          | intact | EBI-1143469 |
| Escherichia coli | association          | intact | EBI-1143757 |
| Escherichia coli | association          | intact | EBI-1135819 |
| Escherichia coli | association          | intact | EBI-1135833 |
| Escherichia coli | association          | intact | EBI-1138091 |
| Escherichia coli | association          | intact | EBI-1138129 |
| Escherichia coli | association          | intact | EBI-1141957 |
| Escherichia coli | association          | intact | EBI-1146204 |
| Escherichia coli | association          | intact | EBI-1143332 |
| Escherichia coli | association          | intact | EBI-1145014 |
| Escherichia coli | association          | intact | EBI-1137807 |
| Escherichia coli | association          | intact | EBI-1137631 |
| Escherichia coli | association          | intact | EBI-1138191 |
| Escherichia coli | association          | intact | EBI-1147590 |
| Escherichia coli | association          | intact | EBI-1140985 |
| Escherichia coli | association          | intact | EBI-1146308 |
| Escherichia coli | association          | intact | EBI-1142317 |
| Escherichia coli | association          | intact | EBI-1136506 |
| Escherichia coli | association          | intact | EBI-1138150 |
| Escherichia coli | association          | intact | EBI-1140928 |
| Escherichia coli | association          | intact | EBI-1145418 |
| Escherichia coli | association          | intact | EBI-1147365 |
| Escherichia coli | association          | intact | EBI-369356  |
| Escherichia coli | association          | intact | EBI-1135871 |
| Escherichia coli | association          | intact | EBI-1142928 |
| Escherichia coli | association          | intact | EBI-1147023 |
| Escherichia coli | association          | intact | EBI-1139115 |
| Escherichia coli | association          | intact | EBI-1141792 |
| Escherichia coli | association          | intact | EBI-882523  |
| Escherichia coli | association          | intact | EBI-1137127 |
| Escherichia coli | association          | intact | EBI-1137495 |
| Escherichia coli | association          | intact | EBI-1139143 |
| Escherichia coli | association          | intact | EBI-1139662 |
| Escherichia coli | association          | intact | EBI-1141336 |
| Escherichia coli | association          | intact | EBI-1141881 |
| Escherichia coli | association          | intact | EBI-1141987 |
| Escherichia coli | association          | intact | EBI-1144337 |
| Escherichia coli | association          | intact | EBI-1144619 |
| Escherichia coli | association          | intact | EBI-1144399 |
| Escherichia coli | physical association | intact | EBI-1771024 |
| Escherichia coli | physical association | intact | EBI-882422  |
| Escherichia coli | association          | intact | EBI-1145733 |

|                  |             |        |             |
|------------------|-------------|--------|-------------|
| Escherichia coli | association | intact | EBI-883047  |
| Escherichia coli | association | intact | EBI-887624  |
| Escherichia coli | association | intact | EBI-890521  |
| Escherichia coli | association | intact | EBI-886442  |
| Escherichia coli | association | intact | EBI-369356  |
| Escherichia coli | association | intact | EBI-371168  |
| Escherichia coli | association | intact | EBI-1136591 |
| Escherichia coli | association | intact | EBI-893805  |
| Escherichia coli | association | intact | EBI-1142232 |
| Escherichia coli | association | intact | EBI-893852  |
| Escherichia coli | association | intact | EBI-887888  |
| Escherichia coli | association | intact | EBI-891042  |

|                  |             |        |             |
|------------------|-------------|--------|-------------|
| Escherichia coli | association | intact | EBI-1136229 |
| Escherichia coli | association | intact | EBI-1136185 |
| Escherichia coli | association | intact | EBI-1145825 |
| Escherichia coli | association | intact | EBI-1135667 |
| Escherichia coli | association | intact | EBI-1135376 |
| Escherichia coli | association | intact | EBI-1141584 |
| Escherichia coli | association | intact | EBI-1135661 |
| Escherichia coli | association | intact | EBI-1137247 |
| Escherichia coli | association | intact | EBI-1136409 |
| Escherichia coli | association | intact | EBI-1145940 |
| Escherichia coli | association | intact | EBI-1140263 |
| Escherichia coli | association | intact | EBI-1142379 |
| Escherichia coli | association | intact | EBI-1147615 |
| Escherichia coli | association | intact | EBI-1141045 |
| Escherichia coli | association | intact | EBI-890164  |
| Escherichia coli | association | intact | EBI-1138406 |
| Escherichia coli | association | intact | EBI-1136695 |
| Escherichia coli | association | intact | EBI-1137040 |
| Escherichia coli | association | intact | EBI-1143426 |
| Escherichia coli | association | intact | EBI-1137410 |
| Escherichia coli | association | intact | EBI-1140917 |
| Escherichia coli | association | intact | EBI-1147365 |
| Escherichia coli | association | intact | EBI-1137818 |
| Escherichia coli | association | intact | EBI-1135576 |
| Escherichia coli | association | intact | EBI-1135630 |
| Escherichia coli | association | intact | EBI-1135867 |
| Escherichia coli | association | intact | EBI-1136432 |
| Escherichia coli | association | intact | EBI-1136849 |
| Escherichia coli | association | intact | EBI-1137323 |
| Escherichia coli | association | intact | EBI-1137336 |
| Escherichia coli | association | intact | EBI-1137343 |
| Escherichia coli | association | intact | EBI-1137356 |

|                  |                      |        |             |
|------------------|----------------------|--------|-------------|
| Escherichia coli | association          | intact | EBI-1137759 |
| Escherichia coli | association          | intact | EBI-1137995 |
| Escherichia coli | association          | intact | EBI-1138104 |
| Escherichia coli | association          | intact | EBI-1140766 |
| Escherichia coli | association          | intact | EBI-1145897 |
| Escherichia coli | association          | intact | EBI-1141917 |
| Escherichia coli | association          | intact | EBI-1143023 |
| Escherichia coli | association          | intact | EBI-1141484 |
| Escherichia coli | association          | intact | EBI-1147216 |
| Escherichia coli | association          | intact | EBI-1141947 |
| Escherichia coli | association          | intact | EBI-1142138 |
| Escherichia coli | association          | intact | EBI-1146009 |
| Escherichia coli | association          | intact | EBI-1144597 |
| Escherichia coli | association          | intact | EBI-1137105 |
| Escherichia coli | association          | intact | EBI-1145187 |
| Escherichia coli | association          | intact | EBI-1144702 |
| Escherichia coli | association          | intact | EBI-1141773 |
| Escherichia coli | association          | intact | EBI-1143773 |
| Escherichia coli | association          | intact | EBI-1144471 |
| Escherichia coli | association          | intact | EBI-1147108 |
| Escherichia coli | association          | intact | EBI-1143426 |
| Escherichia coli | association          | intact | EBI-1142052 |
| Escherichia coli | association          | intact | EBI-1144453 |
| Escherichia coli | association          | intact | EBI-1144619 |
| Escherichia coli | association          | intact | EBI-1139487 |
| Escherichia coli | association          | intact | EBI-884764  |
| Escherichia coli | physical association | intact | EBI-1146651 |
| Escherichia coli | association          | intact | EBI-889451  |
| Escherichia coli | association          | intact | EBI-1141725 |
| Escherichia coli | association          | intact | EBI-1143495 |
| Escherichia coli | association          | intact | EBI-2463360 |
| Escherichia coli | physical association | intact | EBI-2011448 |
| Escherichia coli | association          | intact | EBI-883621  |

|                  |                      |        |             |
|------------------|----------------------|--------|-------------|
| Escherichia coli | association          | intact | EBI-889279  |
| Escherichia coli | physical association | intact | EBI-1770955 |
| Escherichia coli | association          | intact | EBI-880023  |
| Escherichia coli | association          | intact | EBI-880082  |
| Escherichia coli | association          | intact | EBI-888239  |
| Escherichia coli | association          | intact | EBI-878876  |
| Escherichia coli | association          | intact | EBI-885288  |
| Escherichia coli | association          | intact | EBI-1136779 |
| Escherichia coli | association          | intact | EBI-890143  |
| Escherichia coli | association          | intact | EBI-883047  |
| Escherichia coli | association          | intact | EBI-880782  |
| Escherichia coli | association          | intact | EBI-1140303 |
| Escherichia coli | association          | intact | EBI-1135740 |
| Escherichia coli | association          | intact | EBI-890235  |
| Escherichia coli | association          | intact | EBI-881374  |
| Escherichia coli | association          | intact | EBI-880477  |
| Escherichia coli | association          | intact | EBI-1138290 |
| Escherichia coli | association          | intact | EBI-2463360 |
| Escherichia coli | association          | intact | EBI-1139431 |
| Escherichia coli | association          | intact | EBI-887624  |
| Escherichia coli | association          | intact | EBI-885490  |
| Escherichia coli | association          | intact | EBI-1143979 |
| Escherichia coli | association          | intact | EBI-2463360 |
| Escherichia coli | physical association | intact | EBI-893053  |
| Escherichia coli | association          | intact | EBI-2463360 |
| Escherichia coli | physical association | intact | EBI-893838  |
| Escherichia coli | association          | intact | EBI-1142312 |
| Escherichia coli | association          | intact | EBI-1143966 |
| Escherichia coli | association          | intact | EBI-1140332 |
| Escherichia coli | association          | intact | EBI-1145987 |
| Escherichia coli | association          | intact | EBI-1137163 |

|                  |                      |        |             |
|------------------|----------------------|--------|-------------|
| Escherichia coli | association          | intact | EBI-1140631 |
| Escherichia coli | association          | intact | EBI-1137252 |
| Escherichia coli | association          | intact | EBI-1145968 |
| Escherichia coli | physical association | intact | EBI-701090  |
| Escherichia coli | physical association | intact | EBI-701095  |
| Escherichia coli | physical association | intact | EBI-701115  |
| Escherichia coli | association          | intact | EBI-1141782 |
| Escherichia coli | association          | intact | EBI-880166  |
| Escherichia coli | association          | intact | EBI-1141045 |
| Escherichia coli | association          | intact | EBI-1135548 |
| Escherichia coli | association          | intact | EBI-1141940 |
| Escherichia coli | association          | intact | EBI-1136487 |

|                  |                      |        |             |
|------------------|----------------------|--------|-------------|
| Escherichia coli | association          | intact | EBI-1136338 |
| Escherichia coli | physical association | intact | EBI-1136765 |
| Escherichia coli | association          | intact | EBI-1135292 |
| Escherichia coli | association          | intact | EBI-1146605 |
| Escherichia coli | association          | intact | EBI-1146620 |
| Escherichia coli | association          | intact | EBI-1136185 |
| Escherichia coli | association          | intact | EBI-1146573 |
| Escherichia coli | association          | intact | EBI-1135667 |
| Escherichia coli | association          | intact | EBI-1135376 |
| Escherichia coli | association          | intact | EBI-1141152 |
| Escherichia coli | physical association | intact | EBI-1137440 |
| Escherichia coli | association          | intact | EBI-1141584 |
| Escherichia coli | association          | intact | EBI-1136866 |
| Escherichia coli | association          | intact | EBI-1136570 |
| Escherichia coli | association          | intact | EBI-1145762 |
| Escherichia coli | physical association | intact | EBI-1212221 |
| Escherichia coli | physical association | intact | EBI-1212144 |
| Escherichia coli | association          | intact | EBI-1135661 |
| Escherichia coli | association          | intact | EBI-887858  |
| Escherichia coli | association          | intact | EBI-1137450 |
| Escherichia coli | association          | intact | EBI-1137313 |
| Escherichia coli | association          | intact | EBI-1137295 |
| Escherichia coli | association          | intact | EBI-1135730 |
| Escherichia coli | association          | intact | EBI-1138835 |
| Escherichia coli | association          | intact | EBI-1137265 |
| Escherichia coli | association          | intact | EBI-1137252 |
| Escherichia coli | association          | intact | EBI-1137247 |
| Escherichia coli | association          | intact | EBI-1135340 |



|                  |                      |        |             |
|------------------|----------------------|--------|-------------|
| Escherichia coli | association          | intact | EBI-1142560 |
| Escherichia coli | association          | intact | EBI-1136364 |
| Escherichia coli | association          | intact | EBI-1136369 |
| Escherichia coli | association          | intact | EBI-1141898 |
| Escherichia coli | association          | intact | EBI-1135754 |
| Escherichia coli | association          | intact | EBI-1136808 |
| Escherichia coli | association          | intact | EBI-1136343 |
| Escherichia coli | association          | intact | EBI-1136409 |
| Escherichia coli | association          | intact | EBI-1135297 |
| Escherichia coli | association          | intact | EBI-1145928 |
| Escherichia coli | association          | intact | EBI-1135833 |
| Escherichia coli | association          | intact | EBI-1137052 |
| Escherichia coli | association          | intact | EBI-1136317 |
| Escherichia coli | association          | intact | EBI-1136321 |
| Escherichia coli | association          | intact | EBI-1141981 |
| Escherichia coli | association          | intact | EBI-1141045 |
| Escherichia coli | association          | intact | EBI-1135548 |
| Escherichia coli | physical association | intact | EBI-1146579 |
| Escherichia coli | association          | intact | EBI-1137072 |
| Escherichia coli | association          | intact | EBI-1136695 |
| Escherichia coli | association          | intact | EBI-1146582 |
| Escherichia coli | association          | intact | EBI-1142065 |
| Escherichia coli | association          | intact | EBI-1136708 |
| Escherichia coli | association          | intact | EBI-1146517 |
| Escherichia coli | association          | intact | EBI-1146286 |
| Escherichia coli | association          | intact | EBI-1135327 |
| Escherichia coli | association          | intact | EBI-1143426 |
| Escherichia coli | association          | intact | EBI-1143317 |
| Escherichia coli | association          | intact | EBI-1135335 |
| Escherichia coli | association          | intact | EBI-1147221 |
| Escherichia coli | association          | intact | EBI-1137645 |
| Escherichia coli | association          | intact | EBI-1142262 |
| Escherichia coli | association          | intact | EBI-1137384 |
| Escherichia coli | association          | intact | EBI-1146690 |
| Escherichia coli | association          | intact | EBI-1135576 |
| Escherichia coli | association          | intact | EBI-1135630 |
| Escherichia coli | association          | intact | EBI-1135675 |
| Escherichia coli | physical association | intact | EBI-1136424 |
| Escherichia coli | association          | intact | EBI-1136849 |
| Escherichia coli | association          | intact | EBI-1136892 |
| Escherichia coli | association          | intact | EBI-1137323 |
| Escherichia coli | association          | intact | EBI-1137330 |
| Escherichia coli | association          | intact | EBI-1137995 |
| Escherichia coli | association          | intact | EBI-1138002 |
| Escherichia coli | association          | intact | EBI-1140517 |

|                  |                      |        |             |
|------------------|----------------------|--------|-------------|
| Escherichia coli | association          | intact | EBI-1142451 |
| Escherichia coli | association          | intact | EBI-1142510 |
| Escherichia coli | association          | intact | EBI-1146506 |
| Escherichia coli | association          | intact | EBI-1146855 |
| Escherichia coli | association          | intact | EBI-1147040 |
| Escherichia coli | association          | intact | EBI-1147639 |
| Escherichia coli | association          | intact | EBI-1144545 |
| Escherichia coli | association          | intact | EBI-1136950 |
| Escherichia coli | association          | intact | EBI-1140674 |
| Escherichia coli | association          | intact | EBI-1143934 |
| Escherichia coli | association          | intact | EBI-883980  |
| Escherichia coli | association          | intact | EBI-1135704 |
| Escherichia coli | association          | intact | EBI-1140853 |
| Escherichia coli | physical association | intact | EBI-1770991 |
| Escherichia coli | association          | intact | EBI-1143120 |
| Escherichia coli | association          | intact | EBI-1144720 |
| Escherichia coli | association          | intact | EBI-1135630 |
| Escherichia coli | association          | intact | EBI-1142121 |
| Escherichia coli | association          | intact | EBI-1142588 |
| Escherichia coli | association          | intact | EBI-1142635 |
| Escherichia coli | association          | intact | EBI-1144423 |
| Escherichia coli | association          | intact | EBI-1136155 |
| Escherichia coli | association          | intact | EBI-1141833 |
| Escherichia coli | association          | intact | EBI-1142065 |
| Escherichia coli | association          | intact | EBI-889216  |
| Escherichia coli | association          | intact | EBI-1145978 |
| Escherichia coli | association          | intact | EBI-1136539 |
| Escherichia coli | association          | intact | EBI-1137295 |
| Escherichia coli | association          | intact | EBI-1135340 |
| Escherichia coli | physical association | intact | EBI-887922  |
| Escherichia coli | physical association | intact | EBI-1145173 |
| Escherichia coli | association          | intact | EBI-1141650 |
| Escherichia coli | association          | intact | EBI-1147304 |
| Escherichia coli | association          | intact | EBI-1139910 |
| Escherichia coli | association          | intact | EBI-1143729 |
| Escherichia coli | association          | intact | EBI-894104  |
| Escherichia coli | association          | intact | EBI-1137200 |

|                  |                      |        |             |
|------------------|----------------------|--------|-------------|
| Escherichia coli | association          | intact | EBI-878680  |
| Escherichia coli | association          | intact | EBI-1142246 |
| Escherichia coli | association          | intact | EBI-1142466 |
| Escherichia coli | association          | intact | EBI-1143229 |
| Escherichia coli | association          | intact | EBI-1139633 |
| Escherichia coli | association          | intact | EBI-1146889 |
| Escherichia coli | association          | intact | EBI-1144702 |
| Escherichia coli | association          | intact | EBI-1143130 |
| Escherichia coli | association          | intact | EBI-1139633 |
| Escherichia coli | association          | intact | EBI-1137872 |
| Escherichia coli | association          | intact | EBI-885106  |
| Escherichia coli | association          | intact | EBI-1138108 |
| Escherichia coli | association          | intact | EBI-1136095 |
| Escherichia coli | association          | intact | EBI-1141597 |
| Escherichia coli | association          | intact | EBI-880782  |
| Escherichia coli | association          | intact | EBI-1142422 |
| Escherichia coli | association          | intact | EBI-1136986 |
| Escherichia coli | physical association | intact | EBI-1770986 |
| Escherichia coli | physical association | intact | EBI-906876  |
| Escherichia coli | association          | intact | EBI-882596  |
| Escherichia coli | association          | intact | EBI-890164  |
| Escherichia coli | association          | intact | EBI-892291  |
| Escherichia coli | association          | intact | EBI-893588  |
| Escherichia coli | association          | intact | EBI-895275  |
| Escherichia coli | association          | intact | EBI-879853  |
| Escherichia coli | association          | intact | EBI-884726  |
| Escherichia coli | association          | intact | EBI-889250  |

|                  |                      |        |             |
|------------------|----------------------|--------|-------------|
| Escherichia coli | association          | intact | EBI-1145313 |
| Escherichia coli | association          | intact | EBI-1142466 |
| Escherichia coli | association          | intact | EBI-884584  |
| Escherichia coli | association          | intact | EBI-1136666 |
| Escherichia coli | association          | intact | EBI-1144123 |
| Escherichia coli | physical association | intact | EBI-906864  |
| Escherichia coli | association          | intact | EBI-1147818 |
| Escherichia coli | association          | intact | EBI-1135340 |
| Escherichia coli | association          | intact | EBI-1147535 |
| Escherichia coli | association          | intact | EBI-1143469 |
| Escherichia coli | association          | intact | EBI-1137559 |
| Escherichia coli | association          | intact | EBI-1144996 |
| Escherichia coli | association          | intact | EBI-1143160 |
| Escherichia coli | association          | intact | EBI-1141603 |
| Escherichia coli | association          | intact | EBI-1145084 |
| Escherichia coli | association          | intact | EBI-1145418 |
| Escherichia coli | association          | intact | EBI-1145192 |
| Escherichia coli | association          | intact | EBI-1136388 |
| Escherichia coli | association          | intact | EBI-1139033 |
| Escherichia coli | association          | intact | EBI-1147040 |

|                  |                      |        |             |
|------------------|----------------------|--------|-------------|
| Escherichia coli | association          | intact | EBI-892151  |
| Escherichia coli | association          | intact | EBI-891405  |
| Escherichia coli | physical association | intact | EBI-906851  |
| Escherichia coli | association          | intact | EBI-890853  |
| Escherichia coli | association          | intact | EBI-883577  |
| Escherichia coli | association          | intact | EBI-1142893 |
| Escherichia coli | association          | intact | EBI-885490  |
| Escherichia coli | association          | intact | EBI-894820  |
| Escherichia coli | association          | intact | EBI-881973  |
| Escherichia coli | association          | intact | EBI-1143417 |

|                  |             |        |            |
|------------------|-------------|--------|------------|
| Escherichia coli | association | intact | EBI-893104 |
|------------------|-------------|--------|------------|

|                  |             |        |             |
|------------------|-------------|--------|-------------|
| Escherichia coli | association | intact | EBI-1143885 |
| Escherichia coli | association | intact | EBI-1142574 |

|                  |             |        |             |
|------------------|-------------|--------|-------------|
| Escherichia coli | association | intact | EBI-1140341 |
|------------------|-------------|--------|-------------|

|                  |             |        |             |
|------------------|-------------|--------|-------------|
| Escherichia coli | association | intact | EBI-1141384 |
| Escherichia coli | association | intact | EBI-1144923 |

|                  |                      |        |             |
|------------------|----------------------|--------|-------------|
| Escherichia coli | physical association | intact | EBI-1139299 |
| Escherichia coli | association          | intact | EBI-1135454 |
| Escherichia coli | association          | intact | EBI-1137764 |
| Escherichia coli | association          | intact | EBI-1141926 |
| Escherichia coli | association          | intact | EBI-1142959 |
| Escherichia coli | association          | intact | EBI-884584  |
| Escherichia coli | physical association | intact | EBI-906851  |
| Escherichia coli | association          | intact | EBI-1146889 |
| Escherichia coli | physical association | intact | EBI-2370026 |
| Escherichia coli | physical association | intact | EBI-2370454 |
| Escherichia coli | association          | intact | EBI-891214  |
| Escherichia coli | association          | intact | EBI-884130  |
| Escherichia coli | physical association | intact | EBI-1770964 |
| Escherichia coli | association          | intact | EBI-1137559 |
| Escherichia coli | association          | intact | EBI-881294  |
| Escherichia coli | association          | intact | EBI-1140007 |
| Escherichia coli | association          | intact | EBI-888576  |
| Escherichia coli | association          | intact | EBI-888239  |
| Escherichia coli | association          | intact | EBI-1141045 |
| Escherichia coli | association          | intact | EBI-883350  |
| Escherichia coli | physical association | intact | EBI-2370540 |
| Escherichia coli | association          | intact | EBI-884272  |
| Escherichia coli | association          | intact | EBI-885071  |
| Escherichia coli | association          | intact | EBI-890426  |
| Escherichia coli | association          | intact | EBI-882474  |
| Escherichia coli | association          | intact | EBI-879073  |
| Escherichia coli | association          | intact | EBI-1143866 |
| Escherichia coli | association          | intact | EBI-1147552 |
| Escherichia coli | association          | intact | EBI-884206  |
| Escherichia coli | association          | intact | EBI-891237  |
| Escherichia coli | association          | intact | EBI-882305  |
| Escherichia coli | association          | intact | EBI-890053  |
| Escherichia coli | association          | intact | EBI-889228  |
| Escherichia coli | association          | intact | EBI-885288  |
| Escherichia coli | association          | intact | EBI-884272  |
| Escherichia coli | association          | intact | EBI-890426  |
| Escherichia coli | association          | intact | EBI-882474  |
| Escherichia coli | association          | intact | EBI-879073  |
| Escherichia coli | physical association | intact | EBI-1146629 |
| Escherichia coli | association          | intact | EBI-1136185 |

|                  |             |        |             |
|------------------|-------------|--------|-------------|
| Escherichia coli | association | intact | EBI-1141591 |
| Escherichia coli | association | intact | EBI-1140146 |
| Escherichia coli | association | intact | EBI-1137461 |
| Escherichia coli | association | intact | EBI-1138538 |
| Escherichia coli | association | intact | EBI-1140130 |
| Escherichia coli | association | intact | EBI-1143833 |
| Escherichia coli | association | intact | EBI-1142841 |
| Escherichia coli | association | intact | EBI-1142565 |
| Escherichia coli | association | intact | EBI-1145961 |
| Escherichia coli | association | intact | EBI-1136808 |
| Escherichia coli | association | intact | EBI-1143748 |
| Escherichia coli | association | intact | EBI-1145934 |
| Escherichia coli | association | intact | EBI-1139864 |
| Escherichia coli | association | intact | EBI-1143661 |
| Escherichia coli | association | intact | EBI-1142149 |
| Escherichia coli | association | intact | EBI-1142672 |
| Escherichia coli | association | intact | EBI-1138406 |
| Escherichia coli | association | intact | EBI-1143778 |
| Escherichia coli | association | intact | EBI-1143918 |
| Escherichia coli | association | intact | EBI-1139617 |
| Escherichia coli | association | intact | EBI-1147229 |
| Escherichia coli | association | intact | EBI-1140230 |
| Escherichia coli | association | intact | EBI-1143713 |
| Escherichia coli | association | intact | EBI-1140290 |
| Escherichia coli | association | intact | EBI-1140556 |
| Escherichia coli | association | intact | EBI-1142451 |
| Escherichia coli | association | intact | EBI-1143531 |

|                  |             |        |             |
|------------------|-------------|--------|-------------|
| Escherichia coli | association | intact | EBI-1144574 |
| Escherichia coli | association | intact | EBI-1140241 |

|                  |             |        |             |
|------------------|-------------|--------|-------------|
| Escherichia coli | association | intact | EBI-1136570 |
| Escherichia coli | association | intact | EBI-1136403 |
| Escherichia coli | association | intact | EBI-1135853 |
| Escherichia coli | association | intact | EBI-1138072 |
| Escherichia coli | association | intact | EBI-1137688 |
| Escherichia coli | association | intact | EBI-1141650 |

|                  |                      |        |             |
|------------------|----------------------|--------|-------------|
| Escherichia coli | association          | intact | EBI-1137559 |
| Escherichia coli | association          | intact | EBI-1136321 |
| Escherichia coli | physical association | intact | EBI-1143110 |
| Escherichia coli | association          | intact | EBI-1137410 |
| Escherichia coli | association          | intact | EBI-1146135 |
| Escherichia coli | association          | intact | EBI-1146467 |
| Escherichia coli | association          | intact | EBI-1145968 |
| Escherichia coli | association          | intact | EBI-1137587 |
| Escherichia coli | association          | intact | EBI-894532  |
| Escherichia coli | association          | intact | EBI-2931981 |
| Escherichia coli | association          | intact | EBI-1142551 |
| Escherichia coli | association          | intact | EBI-1144337 |
| Escherichia coli | association          | intact | EBI-1141189 |
| Escherichia coli | association          | intact | EBI-1136570 |
| Escherichia coli | association          | intact | EBI-1137265 |
| Escherichia coli | association          | intact | EBI-1145783 |
| Escherichia coli | association          | intact | EBI-880717  |
| Escherichia coli | association          | intact | EBI-2931981 |
| Escherichia coli | association          | intact | EBI-1137072 |
| Escherichia coli | association          | intact | EBI-1139703 |
| Escherichia coli | association          | intact | EBI-1141281 |
| Escherichia coli | association          | intact | EBI-1138588 |
| Escherichia coli | association          | intact | EBI-884189  |
| Escherichia coli | association          | intact | EBI-883908  |
| Escherichia coli | association          | intact | EBI-883980  |
| Escherichia coli | association          | intact | EBI-883848  |
| Escherichia coli | association          | intact | EBI-891956  |
| Escherichia coli | association          | intact | EBI-1142392 |
| Escherichia coli | association          | intact | EBI-1141372 |
| Escherichia coli | association          | intact | EBI-892532  |
| Escherichia coli | association          | intact | EBI-890008  |
| Escherichia coli | association          | intact | EBI-1142078 |
| Escherichia coli | association          | intact | EBI-893488  |
| Escherichia coli | association          | intact | EBI-1139424 |
| Escherichia coli | association          | intact | EBI-882523  |
| Escherichia coli | association          | intact | EBI-1141314 |
| Escherichia coli | association          | intact | EBI-1147639 |
| Escherichia coli | association          | intact | EBI-1140972 |

|                  |                      |        |             |
|------------------|----------------------|--------|-------------|
| Escherichia coli | association          | intact | EBI-892010  |
| Escherichia coli | association          | intact | EBI-1138746 |
| Escherichia coli | association          | intact | EBI-1145690 |
| Escherichia coli | association          | intact | EBI-2463360 |
| Escherichia coli | association          | intact | EBI-890853  |
| Escherichia coli | association          | intact | EBI-881555  |
| Escherichia coli | association          | intact | EBI-885556  |
| Escherichia coli | association          | intact | EBI-892166  |
| Escherichia coli | association          | intact | EBI-884584  |
| Escherichia coli | association          | intact | EBI-891481  |
| Escherichia coli | association          | intact | EBI-1138895 |
| Escherichia coli | association          | intact | EBI-885194  |
| Escherichia coli | association          | intact | EBI-891956  |
| Escherichia coli | association          | intact | EBI-881177  |
| Escherichia coli | association          | intact | EBI-889721  |
| Escherichia coli | association          | intact | EBI-881078  |
| Escherichia coli | association          | intact | EBI-1143201 |
| Escherichia coli | physical association | intact | EBI-885803  |
| Escherichia coli | association          | intact | EBI-889390  |
| Escherichia coli | physical association | intact | EBI-881071  |
| Escherichia coli | association          | intact | EBI-881294  |
| Escherichia coli | association          | intact | EBI-892932  |
| Escherichia coli | association          | intact | EBI-886059  |
| Escherichia coli | physical association | intact | EBI-884495  |
| Escherichia coli | association          | intact | EBI-891396  |
| Escherichia coli | association          | intact | EBI-880367  |
| Escherichia coli | association          | intact | EBI-894195  |
| Escherichia coli | association          | intact | EBI-889159  |
| Escherichia coli | association          | intact | EBI-886413  |
| Escherichia coli | physical association | intact | EBI-883179  |
| Escherichia coli | association          | intact | EBI-878894  |
| Escherichia coli | physical association | intact | EBI-889127  |
| Escherichia coli | association          | intact | EBI-879208  |
| Escherichia coli | association          | intact | EBI-890196  |
| Escherichia coli | association          | intact | EBI-892208  |



|                  |                      |        |             |
|------------------|----------------------|--------|-------------|
| Escherichia coli | physical association | intact | EBI-906966  |
| Escherichia coli | association          | intact | EBI-884415  |
| Escherichia coli | association          | intact | EBI-892889  |
| Escherichia coli | association          | intact | EBI-1137688 |
| Escherichia coli | association          | intact | EBI-885243  |
| Escherichia coli | association          | intact | EBI-893916  |
| Escherichia coli | association          | intact | EBI-1145063 |
| Escherichia coli | association          | intact | EBI-1139772 |
| Escherichia coli | association          | intact | EBI-1138943 |
| Escherichia coli | association          | intact | EBI-1147664 |
| Escherichia coli | association          | intact | EBI-895127  |
| Escherichia coli | association          | intact | EBI-1145610 |
| Escherichia coli | association          | intact | EBI-1144410 |
| Escherichia coli | association          | intact | EBI-1144294 |
| Escherichia coli | association          | intact | EBI-888130  |
| Escherichia coli | association          | intact | EBI-1138562 |
| Escherichia coli | association          | intact | EBI-887304  |
| Escherichia coli | association          | intact | EBI-888366  |
| Escherichia coli | association          | intact | EBI-1138811 |
| Escherichia coli | association          | intact | EBI-1139235 |
| Escherichia coli | association          | intact | EBI-1140746 |
| Escherichia coli | association          | intact | EBI-1141559 |
| Escherichia coli | association          | intact | EBI-1142127 |
| Escherichia coli | association          | intact | EBI-1146506 |
| Escherichia coli | association          | intact | EBI-1147040 |
| Escherichia coli | association          | intact | EBI-1143971 |

|                  |             |        |            |
|------------------|-------------|--------|------------|
| Escherichia coli | association | intact | EBI-879643 |
| Escherichia coli | association | intact | EBI-879589 |
| Escherichia coli | association | intact | EBI-888958 |
| Escherichia coli | association | intact | EBI-892889 |
| Escherichia coli | association | intact | EBI-885194 |
| Escherichia coli | association | intact | EBI-880595 |
| Escherichia coli | association | intact | EBI-881656 |
| Escherichia coli | association | intact | EBI-885288 |

|                  |                      |        |             |
|------------------|----------------------|--------|-------------|
| Escherichia coli | association          | intact | EBI-889536  |
| Escherichia coli | association          | intact | EBI-878697  |
| Escherichia coli | association          | intact | EBI-882671  |
| Escherichia coli | association          | intact | EBI-880676  |
| Escherichia coli | association          | intact | EBI-882273  |
| Escherichia coli | association          | intact | EBI-885677  |
| Escherichia coli | association          | intact | EBI-890853  |
| Escherichia coli | association          | intact | EBI-887873  |
| Escherichia coli | association          | intact | EBI-893552  |
| Escherichia coli | association          | intact | EBI-1143218 |
| Escherichia coli | association          | intact | EBI-1137559 |
| Escherichia coli | association          | intact | EBI-1136570 |
| Escherichia coli | physical association | intact | EBI-2585258 |
| Escherichia coli | association          | intact | EBI-880750  |
| Escherichia coli | association          | intact | EBI-1144549 |
| Escherichia coli | association          | intact | EBI-369356  |
| Escherichia coli | association          | intact | EBI-371168  |
| Escherichia coli | association          | intact | EBI-1140746 |
| Escherichia coli | association          | intact | EBI-886932  |
| Escherichia coli | direct interaction   | intact | EBI-1030801 |
| Escherichia coli | direct interaction   | intact | EBI-1030812 |
| Escherichia coli | direct interaction   | intact | EBI-1032379 |
| Escherichia coli | direct interaction   | intact | EBI-1032389 |
| Escherichia coli | physical association | intact | EBI-2585246 |
| Escherichia coli | physical association | intact | EBI-2585242 |
| Escherichia coli | association          | intact | EBI-1144880 |
| Escherichia coli | association          | intact | EBI-1135450 |
| Escherichia coli | association          | intact | EBI-885556  |
| Escherichia coli | association          | intact | EBI-1138244 |
| Escherichia coli | association          | intact | EBI-1136570 |
| Escherichia coli | association          | intact | EBI-1136666 |
| Escherichia coli | association          | intact | EBI-1145744 |
| Escherichia coli | physical association | intact | EBI-1135316 |
| Escherichia coli | association          | intact | EBI-1137180 |
| Escherichia coli | association          | intact | EBI-1144053 |
| Escherichia coli | association          | intact | EBI-1138177 |
| Escherichia coli | association          | intact | EBI-1146486 |
| Escherichia coli | association          | intact | EBI-1136808 |

|                  |                      |        |             |
|------------------|----------------------|--------|-------------|
| Escherichia coli | association          | intact | EBI-894305  |
| Escherichia coli | association          | intact | EBI-1143017 |
| Escherichia coli | association          | intact | EBI-1136803 |
| Escherichia coli | association          | intact | EBI-1135508 |
| Escherichia coli | association          | intact | EBI-1145928 |
| Escherichia coli | association          | intact | EBI-1142158 |
| Escherichia coli | association          | intact | EBI-1142947 |
| Escherichia coli | association          | intact | EBI-1143101 |
| Escherichia coli | association          | intact | EBI-1135919 |
| Escherichia coli | association          | intact | EBI-1146274 |
| Escherichia coli | association          | intact | EBI-1139475 |
| Escherichia coli | association          | intact | EBI-1147184 |
| Escherichia coli | association          | intact | EBI-1135770 |
| Escherichia coli | association          | intact | EBI-1145192 |
| Escherichia coli | association          | intact | EBI-1143623 |
| Escherichia coli | association          | intact | EBI-371377  |
| Escherichia coli | association          | intact | EBI-369356  |
| Escherichia coli | association          | intact | EBI-1136591 |
| Escherichia coli | association          | intact | EBI-1139361 |
| Escherichia coli | association          | intact | EBI-1136836 |
| Escherichia coli | association          | intact | EBI-1136044 |
| Escherichia coli | association          | intact | EBI-1136071 |
| Escherichia coli | association          | intact | EBI-1136127 |
| Escherichia coli | association          | intact | EBI-1137336 |
| Escherichia coli | association          | intact | EBI-1137943 |
| Escherichia coli | association          | intact | EBI-1138097 |
| Escherichia coli | association          | intact | EBI-1138389 |
| Escherichia coli | association          | intact | EBI-1138650 |
| Escherichia coli | association          | intact | EBI-1140446 |
| Escherichia coli | association          | intact | EBI-1140947 |
| Escherichia coli | association          | intact | EBI-1141618 |
| Escherichia coli | association          | intact | EBI-1143389 |
| Escherichia coli | association          | intact | EBI-1143860 |
| Escherichia coli | association          | intact | EBI-1144158 |
| Escherichia coli | association          | intact | EBI-1146254 |
| Escherichia coli | association          | intact | EBI-1140891 |
| Escherichia coli | physical association | intact | EBI-1144176 |

|                  |             |        |             |
|------------------|-------------|--------|-------------|
| Escherichia coli | association | intact | EBI-1143364 |
|------------------|-------------|--------|-------------|

|                  |                      |        |             |
|------------------|----------------------|--------|-------------|
| Escherichia coli | association          | intact | EBI-369356  |
| Escherichia coli | association          | intact | EBI-371168  |
| Escherichia coli | association          | intact | EBI-1138274 |
| Escherichia coli | association          | intact | EBI-889915  |
| Escherichia coli | physical association | intact | EBI-906951  |
| Escherichia coli | association          | intact | EBI-1140146 |
| Escherichia coli | association          | intact | EBI-883621  |
| Escherichia coli | association          | intact | EBI-1137295 |
| Escherichia coli | association          | intact | EBI-1141347 |
| Escherichia coli | association          | intact | EBI-887624  |
| Escherichia coli | association          | intact | EBI-885490  |
| Escherichia coli | association          | intact | EBI-1143023 |
| Escherichia coli | association          | intact | EBI-885106  |
| Escherichia coli | association          | intact | EBI-1140007 |
| Escherichia coli | association          | intact | EBI-893117  |
| Escherichia coli | association          | intact | EBI-886823  |
| Escherichia coli | association          | intact | EBI-1145014 |
| Escherichia coli | association          | intact | EBI-881973  |
| Escherichia coli | association          | intact | EBI-885288  |
| Escherichia coli | association          | intact | EBI-1143080 |
| Escherichia coli | association          | intact | EBI-886257  |
| Escherichia coli | association          | intact | EBI-892741  |
| Escherichia coli | association          | intact | EBI-886310  |
| Escherichia coli | association          | intact | EBI-1145192 |
| Escherichia coli | association          | intact | EBI-882920  |
| Escherichia coli | association          | intact | EBI-1141281 |
| Escherichia coli | association          | intact | EBI-1141559 |
| Escherichia coli | association          | intact | EBI-885677  |
| Escherichia coli | association          | intact | EBI-892010  |
| Escherichia coli | association          | intact | EBI-883997  |
| Escherichia coli | association          | intact | EBI-880477  |
| Escherichia coli | association          | intact | EBI-884415  |

|                  |                    |        |             |
|------------------|--------------------|--------|-------------|
| Escherichia coli | association        | intact | EBI-1140223 |
| Escherichia coli | association        | intact | EBI-883484  |
| Escherichia coli | association        | intact | EBI-1136409 |
| Escherichia coli | association        | intact | EBI-1137052 |
| Escherichia coli | association        | intact | EBI-1138903 |
| Escherichia coli | association        | intact | EBI-1144562 |
| Escherichia coli | association        | intact | EBI-893916  |
| Escherichia coli | association        | intact | EBI-891136  |
| Escherichia coli | association        | intact | EBI-1143364 |
| Escherichia coli | association        | intact | EBI-884415  |
| Escherichia coli | association        | intact | EBI-1143195 |
| Escherichia coli | association        | intact | EBI-879466  |
| Escherichia coli | association        | intact | EBI-893916  |
| Escherichia coli | association        | intact | EBI-883047  |
| Escherichia coli | direct interaction | intact | EBI-1040059 |
| Escherichia coli | association        | intact | EBI-1138826 |
| Escherichia coli | association        | intact | EBI-1137252 |
| Escherichia coli | association        | intact | EBI-1138783 |
| Escherichia coli | association        | intact | EBI-1146778 |
| Escherichia coli | association        | intact | EBI-1139633 |
| Escherichia coli | association        | intact | EBI-1137052 |
| Escherichia coli | association        | intact | EBI-1143641 |
| Escherichia coli | association        | intact | EBI-1145404 |
| Escherichia coli | association        | intact | EBI-1146986 |
| Escherichia coli | association        | intact | EBI-1147040 |
| Escherichia coli | association        | intact | EBI-852941  |
| Escherichia coli | association        | intact | EBI-1137163 |
| Escherichia coli | association        | intact | EBI-1146620 |
| Escherichia coli | association        | intact | EBI-1141871 |
| Escherichia coli | association        | intact | EBI-1135611 |
| Escherichia coli | association        | intact | EBI-1139166 |
| Escherichia coli | association        | intact | EBI-886164  |
| Escherichia coli | association        | intact | EBI-1146919 |

|                  |                      |        |             |
|------------------|----------------------|--------|-------------|
| Escherichia coli | association          | intact | EBI-1143120 |
| Escherichia coli | association          | intact | EBI-1138552 |
| Escherichia coli | association          | intact | EBI-1143195 |
| Escherichia coli | association          | intact | EBI-1145783 |
| Escherichia coli | association          | intact | EBI-1142364 |
| Escherichia coli | association          | intact | EBI-1147615 |
| Escherichia coli | association          | intact | EBI-1135540 |
| Escherichia coli | physical association | intact | EBI-604135  |
| Escherichia coli | physical association | intact | EBI-604153  |
| Escherichia coli | association          | intact | EBI-887873  |
| Escherichia coli | association          | intact | EBI-893552  |
| Escherichia coli | physical association | intact | EBI-1143157 |
| Escherichia coli | association          | intact | EBI-1147147 |
| Escherichia coli | association          | intact | EBI-1135688 |
| Escherichia coli | association          | intact | EBI-1136008 |
| Escherichia coli | physical association | intact | EBI-1146389 |
| Escherichia coli | association          | intact | EBI-1136708 |
| Escherichia coli | association          | intact | EBI-1146979 |
| Escherichia coli | association          | intact | EBI-1138150 |
| Escherichia coli | association          | intact | EBI-1140928 |
| Escherichia coli | association          | intact | EBI-1137410 |
| Escherichia coli | association          | intact | EBI-1147078 |
| Escherichia coli | association          | intact | EBI-1144382 |
| Escherichia coli | association          | intact | EBI-888431  |
| Escherichia coli | association          | intact | EBI-1145987 |
| Escherichia coli | association          | intact | EBI-1137539 |
| Escherichia coli | association          | intact | EBI-1140807 |
| Escherichia coli | association          | intact | EBI-1141277 |
| Escherichia coli | association          | intact | EBI-1143701 |
| Escherichia coli | association          | intact | EBI-1139487 |
| Escherichia coli | association          | intact | EBI-1143817 |
| Escherichia coli | association          | intact | EBI-2463360 |

|                  |                      |        |             |
|------------------|----------------------|--------|-------------|
| Escherichia coli | physical association | intact | EBI-884476  |
| Escherichia coli | association          | intact | EBI-1147023 |
| Escherichia coli | physical association | intact | EBI-878829  |

|                  |                      |        |             |
|------------------|----------------------|--------|-------------|
| Escherichia coli | association          | intact | EBI-1141189 |
| Escherichia coli | association          | intact | EBI-1136626 |
| Escherichia coli | association          | intact | EBI-1137295 |
| Escherichia coli | association          | intact | EBI-1136369 |
| Escherichia coli | association          | intact | EBI-1143235 |
| Escherichia coli | association          | intact | EBI-1137101 |
| Escherichia coli | association          | intact | EBI-1136591 |
| Escherichia coli | association          | intact | EBI-1146826 |
| Escherichia coli | association          | intact | EBI-1144499 |
| Escherichia coli | association          | intact | EBI-885243  |
| Escherichia coli | association          | intact | EBI-894403  |
| Escherichia coli | association          | intact | EBI-894085  |
| Escherichia coli | association          | intact | EBI-1142093 |
| Escherichia coli | association          | intact | EBI-371377  |
| Escherichia coli | association          | intact | EBI-1144759 |
| Escherichia coli | association          | intact | EBI-886031  |
| Escherichia coli | association          | intact | EBI-1145702 |
| Escherichia coli | association          | intact | EBI-881294  |
| Escherichia coli | physical association | intact | EBI-890408  |
| Escherichia coli | association          | intact | EBI-1145035 |
| Escherichia coli | association          | intact | EBI-893067  |
| Escherichia coli | association          | intact | EBI-849240  |
| Escherichia coli | association          | intact | EBI-849332  |
| Escherichia coli | association          | intact | EBI-849357  |
| Escherichia coli | association          | intact | EBI-849381  |
| Escherichia coli | association          | intact | EBI-849407  |
| Escherichia coli | association          | intact | EBI-849432  |
| Escherichia coli | association          | intact | EBI-849464  |
| Escherichia coli | association          | intact | EBI-1137900 |

|                  |                      |        |             |
|------------------|----------------------|--------|-------------|
| Escherichia coli | association          | intact | EBI-1145275 |
| Escherichia coli | association          | intact | EBI-1135857 |
| Escherichia coli | association          | intact | EBI-1136939 |
| Escherichia coli | physical association | intact | EBI-1147992 |
| Escherichia coli | association          | intact | EBI-1147473 |
| Escherichia coli | association          | intact | EBI-1136185 |
| Escherichia coli | association          | intact | EBI-1137919 |
| Escherichia coli | association          | intact | EBI-1137933 |
| Escherichia coli | association          | intact | EBI-1136626 |
| Escherichia coli | association          | intact | EBI-1137461 |
| Escherichia coli | association          | intact | EBI-1136296 |
| Escherichia coli | association          | intact | EBI-1136570 |
| Escherichia coli | association          | intact | EBI-1139588 |
| Escherichia coli | association          | intact | EBI-1139965 |
| Escherichia coli | association          | intact | EBI-1139961 |
| Escherichia coli | association          | intact | EBI-1137454 |
| Escherichia coli | association          | intact | EBI-1137778 |
| Escherichia coli | physical association | intact | EBI-1141581 |
| Escherichia coli | association          | intact | EBI-1144059 |
| Escherichia coli | association          | intact | EBI-1141366 |
| Escherichia coli | association          | intact | EBI-1139571 |
| Escherichia coli | association          | intact | EBI-1145961 |
| Escherichia coli | association          | intact | EBI-1140245 |
| Escherichia coli | association          | intact | EBI-1145055 |
| Escherichia coli | association          | intact | EBI-1139271 |
| Escherichia coli | association          | intact | EBI-1136343 |
| Escherichia coli | association          | intact | EBI-1147088 |
| Escherichia coli | association          | intact | EBI-1143744 |
| Escherichia coli | association          | intact | EBI-1140456 |
| Escherichia coli | association          | intact | EBI-1145934 |
| Escherichia coli | association          | intact | EBI-1135833 |
| Escherichia coli | association          | intact | EBI-1140263 |
| Escherichia coli | association          | intact | EBI-1139804 |
| Escherichia coli | association          | intact | EBI-1147482 |
| Escherichia coli | association          | intact | EBI-1144372 |
| Escherichia coli | association          | intact | EBI-1137637 |
| Escherichia coli | association          | intact | EBI-1137834 |
| Escherichia coli | association          | intact | EBI-1138091 |
| Escherichia coli | association          | intact | EBI-1137885 |
| Escherichia coli | association          | intact | EBI-1135529 |
| Escherichia coli | association          | intact | EBI-1138378 |
| Escherichia coli | association          | intact | EBI-1138371 |
| Escherichia coli | physical association | intact | EBI-1141578 |
| Escherichia coli | association          | intact | EBI-1139921 |
| Escherichia coli | physical association | intact | EBI-1147636 |



|                  |                      |        |             |
|------------------|----------------------|--------|-------------|
| Escherichia coli | association          | intact | EBI-1145810 |
| Escherichia coli | association          | intact | EBI-1140903 |
| Escherichia coli | association          | intact | EBI-1147454 |
| Escherichia coli | association          | intact | EBI-1136004 |
| Escherichia coli | association          | intact | EBI-1143778 |
| Escherichia coli | physical association | intact | EBI-1139174 |
| Escherichia coli | association          | intact | EBI-1143250 |
| Escherichia coli | physical association | intact | EBI-1136445 |
| Escherichia coli | association          | intact | EBI-1136794 |
| Escherichia coli | association          | intact | EBI-1143426 |
| Escherichia coli | association          | intact | EBI-1141711 |
| Escherichia coli | association          | intact | EBI-1137410 |
| Escherichia coli | physical association | intact | EBI-1135533 |
| Escherichia coli | association          | intact | EBI-1140230 |
| Escherichia coli | association          | intact | EBI-1144410 |
| Escherichia coli | physical association | intact | EBI-1136452 |
| Escherichia coli | association          | intact | EBI-1139197 |
| Escherichia coli | association          | intact | EBI-1144382 |
| Escherichia coli | association          | intact | EBI-1140113 |
| Escherichia coli | association          | intact | EBI-1143623 |
| Escherichia coli | association          | intact | EBI-1137818 |
| Escherichia coli | association          | intact | EBI-1136301 |
| Escherichia coli | association          | intact | EBI-1143374 |
| Escherichia coli | association          | intact | EBI-1147023 |
| Escherichia coli | association          | intact | EBI-1145987 |
| Escherichia coli | association          | intact | EBI-1143357 |
| Escherichia coli | association          | intact | EBI-1141792 |
| Escherichia coli | association          | intact | EBI-1142735 |
| Escherichia coli | association          | intact | EBI-1146722 |
| Escherichia coli | association          | intact | EBI-1144212 |
| Escherichia coli | physical association | intact | EBI-1135968 |
| Escherichia coli | association          | intact | EBI-1136199 |
| Escherichia coli | association          | intact | EBI-1136204 |
| Escherichia coli | association          | intact | EBI-1136218 |
| Escherichia coli | physical association | intact | EBI-1136863 |
| Escherichia coli | association          | intact | EBI-1137995 |
| Escherichia coli | association          | intact | EBI-1138852 |
| Escherichia coli | association          | intact | EBI-1138952 |
| Escherichia coli | association          | intact | EBI-1139308 |
| Escherichia coli | association          | intact | EBI-1139564 |
| Escherichia coli | association          | intact | EBI-1139662 |
| Escherichia coli | association          | intact | EBI-1139852 |
| Escherichia coli | association          | intact | EBI-1140433 |
| Escherichia coli | association          | intact | EBI-1140527 |
| Escherichia coli | association          | intact | EBI-1140556 |

|                  |                      |        |             |
|------------------|----------------------|--------|-------------|
| Escherichia coli | association          | intact | EBI-1140746 |
| Escherichia coli | association          | intact | EBI-1140807 |
| Escherichia coli | association          | intact | EBI-1140820 |
| Escherichia coli | association          | intact | EBI-1141091 |
| Escherichia coli | association          | intact | EBI-1142763 |
| Escherichia coli | association          | intact | EBI-1143181 |
| Escherichia coli | association          | intact | EBI-1143348 |
| Escherichia coli | association          | intact | EBI-1143531 |
| Escherichia coli | association          | intact | EBI-1143562 |
| Escherichia coli | association          | intact | EBI-1143785 |
| Escherichia coli | association          | intact | EBI-1144822 |
| Escherichia coli | association          | intact | EBI-1146475 |
| Escherichia coli | association          | intact | EBI-1140062 |
| Escherichia coli | association          | intact | EBI-1143583 |
| Escherichia coli | association          | intact | EBI-1144607 |
| Escherichia coli | association          | intact | EBI-1144272 |
| Escherichia coli | physical association | intact | EBI-1771006 |
| Escherichia coli | association          | intact | EBI-1140245 |
| Escherichia coli | association          | intact | EBI-890164  |
| Escherichia coli | association          | intact | EBI-369356  |
| Escherichia coli | association          | intact | EBI-884632  |
| Escherichia coli | physical association | intact | EBI-1213311 |
| Escherichia coli | association          | intact | EBI-1135754 |
| Escherichia coli | association          | intact | EBI-893901  |
| Escherichia coli | association          | intact | EBI-887624  |
| Escherichia coli | association          | intact | EBI-894052  |
| Escherichia coli | association          | intact | EBI-880717  |
| Escherichia coli | association          | intact | EBI-1137807 |
| Escherichia coli | association          | intact | EBI-1137265 |
| Escherichia coli | physical association | intact | EBI-1143074 |
| Escherichia coli | association          | intact | EBI-1146718 |
| Escherichia coli | association          | intact | EBI-1146877 |
| Escherichia coli | association          | intact | EBI-1145978 |
| Escherichia coli | association          | intact | EBI-1138573 |
| Escherichia coli | association          | intact | EBI-885524  |
| Escherichia coli | association          | intact | EBI-1137443 |

|                  |             |        |             |
|------------------|-------------|--------|-------------|
| Escherichia coli | association | intact | EBI-884584  |
| Escherichia coli | association | intact | EBI-1138244 |
| Escherichia coli | association | intact | EBI-1136570 |
| Escherichia coli | association | intact | EBI-1137555 |
| Escherichia coli | association | intact | EBI-883577  |
| Escherichia coli | association | intact | EBI-890575  |
| Escherichia coli | association | intact | EBI-885194  |
| Escherichia coli | association | intact | EBI-880291  |
| Escherichia coli | association | intact | EBI-881109  |
| Escherichia coli | association | intact | EBI-1137295 |
| Escherichia coli | association | intact | EBI-880067  |
| Escherichia coli | association | intact | EBI-887148  |
| Escherichia coli | association | intact | EBI-888637  |
| Escherichia coli | association | intact | EBI-1138783 |
| Escherichia coli | association | intact | EBI-1143469 |
| Escherichia coli | association | intact | EBI-880595  |
| Escherichia coli | association | intact | EBI-880166  |
| Escherichia coli | association | intact | EBI-880782  |
| Escherichia coli | association | intact | EBI-881219  |
| Escherichia coli | association | intact | EBI-1140007 |
| Escherichia coli | association | intact | EBI-1137971 |
| Escherichia coli | association | intact | EBI-1139921 |
| Escherichia coli | association | intact | EBI-1143101 |
| Escherichia coli | association | intact | EBI-1143250 |
| Escherichia coli | association | intact | EBI-1146316 |
| Escherichia coli | association | intact | EBI-881132  |
| Escherichia coli | association | intact | EBI-885288  |
| Escherichia coli | association | intact | EBI-1147184 |
| Escherichia coli | association | intact | EBI-880504  |
| Escherichia coli | association | intact | EBI-886253  |
| Escherichia coli | association | intact | EBI-1145355 |
| Escherichia coli | association | intact | EBI-880876  |
| Escherichia coli | association | intact | EBI-1145192 |
| Escherichia coli | association | intact | EBI-1147006 |
| Escherichia coli | association | intact | EBI-1140480 |
| Escherichia coli | association | intact | EBI-1136531 |
| Escherichia coli | association | intact | EBI-1137222 |
| Escherichia coli | association | intact | EBI-1137911 |
| Escherichia coli | association | intact | EBI-1138226 |
| Escherichia coli | association | intact | EBI-1139025 |
| Escherichia coli | association | intact | EBI-1139542 |
| Escherichia coli | association | intact | EBI-1140746 |
| Escherichia coli | association | intact | EBI-888778  |
| Escherichia coli | association | intact | EBI-881807  |
| Escherichia coli | association | intact | EBI-1147585 |

|                  |                      |        |             |
|------------------|----------------------|--------|-------------|
| Escherichia coli | association          | intact | EBI-1137019 |
| Escherichia coli | physical association | intact | EBI-1214251 |
| Escherichia coli | association          | intact | EBI-1135798 |
| Escherichia coli | association          | intact | EBI-1135846 |
| Escherichia coli | association          | intact | EBI-1144280 |
| Escherichia coli | association          | intact | EBI-1145628 |
| Escherichia coli | association          | intact | EBI-1143160 |
| Escherichia coli | association          | intact | EBI-882138  |
| Escherichia coli | association          | intact | EBI-878935  |
| Escherichia coli | association          | intact | EBI-890990  |
| Escherichia coli | association          | intact | EBI-880595  |
| Escherichia coli | association          | intact | EBI-893980  |
| Escherichia coli | association          | intact | EBI-1135444 |
| Escherichia coli | association          | intact | EBI-1142893 |
| Escherichia coli | physical association | intact | EBI-1147692 |
| Escherichia coli | association          | intact | EBI-1139302 |
| Escherichia coli | association          | intact | EBI-1145192 |
| Escherichia coli | association          | intact | EBI-1143039 |
| Escherichia coli | association          | intact | EBI-2463360 |
| Escherichia coli | association          | intact | EBI-1147939 |
| Escherichia coli | association          | intact | EBI-1144792 |
| Escherichia coli | association          | intact | EBI-1139143 |
| Escherichia coli | association          | intact | EBI-1147977 |
| Escherichia coli | association          | intact | EBI-894652  |
| Escherichia coli | physical association | intact | EBI-1774611 |
| Escherichia coli | physical association | intact | EBI-1774969 |
| Escherichia coli | direct interaction   | intact | EBI-1774824 |
| Escherichia coli | direct interaction   | intact | EBI-1775032 |
| Escherichia coli | direct interaction   | intact | EBI-1774645 |
| Escherichia coli | physical association | intact | EBI-1774733 |
| Escherichia coli | association          | intact | EBI-1139950 |
| Escherichia coli | physical association | intact | EBI-1771045 |

|                  |             |        |             |
|------------------|-------------|--------|-------------|
| Escherichia coli | association | intact | EBI-369356  |
| Escherichia coli | association | intact | EBI-889279  |
| Escherichia coli | association | intact | EBI-884206  |
| Escherichia coli | association | intact | EBI-880023  |
| Escherichia coli | association | intact | EBI-885106  |
| Escherichia coli | association | intact | EBI-880082  |
| Escherichia coli | association | intact | EBI-888239  |
| Escherichia coli | association | intact | EBI-886936  |
| Escherichia coli | association | intact | EBI-884415  |
| Escherichia coli | association | intact | EBI-886990  |
| Escherichia coli | association | intact | EBI-890481  |
| Escherichia coli | association | intact | EBI-1146204 |
| Escherichia coli | association | intact | EBI-1135770 |
| Escherichia coli | association | intact | EBI-1141500 |
| Escherichia coli | association | intact | EBI-878935  |
| Escherichia coli | association | intact | EBI-883621  |
| Escherichia coli | association | intact | EBI-880261  |
| Escherichia coli | association | intact | EBI-880023  |
| Escherichia coli | association | intact | EBI-880082  |
| Escherichia coli | association | intact | EBI-888239  |
| Escherichia coli | association | intact | EBI-1135548 |
| Escherichia coli | association | intact | EBI-1137631 |
| Escherichia coli | association | intact | EBI-1137587 |
| Escherichia coli | association | intact | EBI-885288  |
| Escherichia coli | association | intact | EBI-1139945 |
| Escherichia coli | association | intact | EBI-1135466 |
| Escherichia coli | association | intact | EBI-1142224 |
| Escherichia coli | association | intact | EBI-1145878 |
| Escherichia coli | association | intact | EBI-1136481 |
| Escherichia coli | association | intact | EBI-891673  |
| Escherichia coli | association | intact | EBI-1140323 |
| Escherichia coli | association | intact | EBI-1142614 |
| Escherichia coli | association | intact | EBI-1142689 |
| Escherichia coli | association | intact | EBI-1147040 |
| Escherichia coli | association | intact | EBI-1137163 |

|                  |                      |        |             |
|------------------|----------------------|--------|-------------|
| Escherichia coli | association          | intact | EBI-851486  |
| Escherichia coli | association          | intact | EBI-1140873 |
| Escherichia coli | physical association | intact | EBI-906887  |
| Escherichia coli | association          | intact | EBI-1138439 |
| Escherichia coli | association          | intact | EBI-1147905 |
| Escherichia coli | physical association | intact | EBI-1146006 |

|                  |                    |        |             |
|------------------|--------------------|--------|-------------|
| Escherichia coli | direct interaction | intact | EBI-976140  |
| Escherichia coli | association        | intact | EBI-894976  |
| Escherichia coli | association        | intact | EBI-1139089 |

|                  |                      |        |             |
|------------------|----------------------|--------|-------------|
| Escherichia coli | association          | intact | EBI-1146730 |
| Escherichia coli | physical association | intact | EBI-1213360 |
| Escherichia coli | physical association | intact | EBI-1213360 |

|                  |             |        |             |
|------------------|-------------|--------|-------------|
| Escherichia coli | association | intact | EBI-894357  |
| Escherichia coli | association | intact | EBI-1139089 |

|                  |             |        |             |
|------------------|-------------|--------|-------------|
| Escherichia coli | association | intact | EBI-1142379 |
| Escherichia coli | association | intact | EBI-1145573 |

|                  |                      |        |             |
|------------------|----------------------|--------|-------------|
| Escherichia coli | association          | intact | EBI-1146787 |
| Escherichia coli | association          | intact | EBI-1143600 |
| Escherichia coli | association          | intact | EBI-883047  |
| Escherichia coli | association          | intact | EBI-880782  |
| Escherichia coli | physical association | intact | EBI-1146727 |
| Escherichia coli | association          | intact | EBI-1135304 |
| Escherichia coli | association          | intact | EBI-891042  |

|                  |             |        |             |
|------------------|-------------|--------|-------------|
| Escherichia coli | association | intact | EBI-1137610 |
| Escherichia coli | association | intact | EBI-1146094 |
| Escherichia coli | association | intact | EBI-1146377 |
| Escherichia coli | association | intact | EBI-1141637 |
| Escherichia coli | association | intact | EBI-1136261 |
| Escherichia coli | association | intact | EBI-1136794 |
| Escherichia coli | association | intact | EBI-1147184 |
| Escherichia coli | association | intact | EBI-1139892 |
| Escherichia coli | association | intact | EBI-1147464 |

|                  |                      |        |             |
|------------------|----------------------|--------|-------------|
| Escherichia coli | association          | intact | EBI-885677  |
| Escherichia coli | physical association | intact | EBI-2369900 |

|                  |                      |        |             |
|------------------|----------------------|--------|-------------|
| Escherichia coli | association          | intact | EBI-884584  |
| Escherichia coli | association          | intact | EBI-884518  |
| Escherichia coli | association          | intact | EBI-883621  |
| Escherichia coli | association          | intact | EBI-886509  |
| Escherichia coli | association          | intact | EBI-889981  |
| Escherichia coli | association          | intact | EBI-887293  |
| Escherichia coli | association          | intact | EBI-881166  |
| Escherichia coli | association          | intact | EBI-884206  |
| Escherichia coli | association          | intact | EBI-884130  |
| Escherichia coli | association          | intact | EBI-880782  |
| Escherichia coli | association          | intact | EBI-880023  |
| Escherichia coli | association          | intact | EBI-885106  |
| Escherichia coli | association          | intact | EBI-881294  |
| Escherichia coli | association          | intact | EBI-879887  |
| Escherichia coli | association          | intact | EBI-883913  |
| Escherichia coli | association          | intact | EBI-885288  |
| Escherichia coli | association          | intact | EBI-880477  |
| Escherichia coli | association          | intact | EBI-880876  |
| Escherichia coli | physical association | intact | EBI-1212221 |
| Escherichia coli | physical association | intact | EBI-1212144 |
| Escherichia coli | association          | intact | EBI-1144847 |
| Escherichia coli | physical association | intact | EBI-850497  |
| Escherichia coli | physical association | intact | EBI-850664  |
| Escherichia coli | association          | intact | EBI-1144702 |
| Escherichia coli | association          | intact | EBI-894357  |
| Escherichia coli | association          | intact | EBI-1146146 |
| Escherichia coli | association          | intact | EBI-1139910 |
| Escherichia coli | association          | intact | EBI-889216  |
| Escherichia coli | association          | intact | EBI-888239  |
| Escherichia coli | association          | intact | EBI-1139510 |
| Escherichia coli | association          | intact | EBI-892424  |
| Escherichia coli | association          | intact | EBI-1147540 |
| Escherichia coli | association          | intact | EBI-1141189 |
| Escherichia coli | association          | intact | EBI-1145628 |
| Escherichia coli | association          | intact | EBI-1141473 |
| Escherichia coli | association          | intact | EBI-888239  |
| Escherichia coli | association          | intact | EBI-880477  |
| Escherichia coli | association          | intact | EBI-1139235 |
| Escherichia coli | association          | intact | EBI-1136918 |

|                  |             |        |             |
|------------------|-------------|--------|-------------|
| Escherichia coli | association | intact | EBI-1143551 |
| Escherichia coli | association | intact | EBI-1139011 |
| Escherichia coli | association | intact | EBI-1139698 |

|                  |             |        |             |
|------------------|-------------|--------|-------------|
| Escherichia coli | association | intact | EBI-1141171 |
| Escherichia coli | association | intact | EBI-1144847 |
| Escherichia coli | association | intact | EBI-1138503 |
| Escherichia coli | association | intact | EBI-1141763 |
| Escherichia coli | association | intact | EBI-1144720 |
| Escherichia coli | association | intact | EBI-1139950 |
| Escherichia coli | association | intact | EBI-1143979 |
| Escherichia coli | association | intact | EBI-1145987 |
| Escherichia coli | association | intact | EBI-1139235 |
| Escherichia coli | association | intact | EBI-1140096 |

|                  |             |        |             |
|------------------|-------------|--------|-------------|
| Escherichia coli | association | intact | EBI-1137983 |
| Escherichia coli | association | intact | EBI-1137896 |

|                  |                      |        |             |
|------------------|----------------------|--------|-------------|
| Escherichia coli | physical association | intact | EBI-907273  |
| Escherichia coli | association          | intact | EBI-1137964 |

|                  |                      |        |             |
|------------------|----------------------|--------|-------------|
| Escherichia coli | association          | intact | EBI-1146797 |
| Escherichia coli | physical association | intact | EBI-2012478 |
| Escherichia coli | physical association | intact | EBI-2023957 |
| Escherichia coli | physical association | intact | EBI-2012429 |
| Escherichia coli | physical association | intact | EBI-2012449 |
| Escherichia coli | association          | intact | EBI-1146766 |

|                  |                      |        |             |
|------------------|----------------------|--------|-------------|
| Escherichia coli | association          | intact | EBI-1138145 |
| Escherichia coli | physical association | intact | EBI-2012491 |
| Escherichia coli | physical association | intact | EBI-2012567 |



|                  |                      |        |             |
|------------------|----------------------|--------|-------------|
| Escherichia coli | association          | intact | EBI-1135927 |
| Escherichia coli | association          | intact | EBI-1143946 |
| Escherichia coli | association          | intact | EBI-1147078 |
| Escherichia coli | association          | intact | EBI-1144972 |
| Escherichia coli | association          | intact | EBI-1140722 |
| Escherichia coli | association          | intact | EBI-1145298 |
| Escherichia coli | association          | intact | EBI-1136986 |
| Escherichia coli | association          | intact | EBI-1136828 |
| Escherichia coli | association          | intact | EBI-1140303 |
| Escherichia coli | association          | intact | EBI-1146826 |
| Escherichia coli | association          | intact | EBI-893104  |
| Escherichia coli | association          | intact | EBI-1141597 |
| Escherichia coli | physical association | intact | EBI-2369425 |
| Escherichia coli | association          | intact | EBI-892878  |
| Escherichia coli | association          | intact | EBI-886481  |
| Escherichia coli | association          | intact | EBI-885556  |
| Escherichia coli | association          | intact | EBI-1141189 |
| Escherichia coli | association          | intact | EBI-884518  |
| Escherichia coli | association          | intact | EBI-883621  |
| Escherichia coli | association          | intact | EBI-880291  |
| Escherichia coli | association          | intact | EBI-889981  |
| Escherichia coli | association          | intact | EBI-1135730 |
| Escherichia coli | association          | intact | EBI-1135340 |
| Escherichia coli | association          | intact | EBI-881093  |
| Escherichia coli | association          | intact | EBI-889279  |
| Escherichia coli | association          | intact | EBI-1138177 |
| Escherichia coli | association          | intact | EBI-1140371 |
| Escherichia coli | association          | intact | EBI-884206  |
| Escherichia coli | association          | intact | EBI-880782  |
| Escherichia coli | association          | intact | EBI-880023  |
| Escherichia coli | association          | intact | EBI-880082  |
| Escherichia coli | association          | intact | EBI-1135833 |
| Escherichia coli | association          | intact | EBI-879887  |
| Escherichia coli | association          | intact | EBI-881611  |
| Escherichia coli | association          | intact | EBI-879008  |
| Escherichia coli | association          | intact | EBI-880367  |
| Escherichia coli | association          | intact | EBI-886705  |
| Escherichia coli | association          | intact | EBI-1137807 |
| Escherichia coli | association          | intact | EBI-2931981 |
| Escherichia coli | association          | intact | EBI-883350  |

|                  |                      |        |             |
|------------------|----------------------|--------|-------------|
| Escherichia coli | association          | intact | EBI-883913  |
| Escherichia coli | association          | intact | EBI-880430  |
| Escherichia coli | association          | intact | EBI-878876  |
| Escherichia coli | association          | intact | EBI-1139608 |
| Escherichia coli | association          | intact | EBI-881495  |
| Escherichia coli | association          | intact | EBI-881523  |
| Escherichia coli | association          | intact | EBI-885288  |
| Escherichia coli | association          | intact | EBI-886413  |
| Escherichia coli | association          | intact | EBI-879354  |
| Escherichia coli | association          | intact | EBI-880477  |
| Escherichia coli | association          | intact | EBI-371168  |
| Escherichia coli | association          | intact | EBI-2463360 |
| Escherichia coli | association          | intact | EBI-1135630 |
| Escherichia coli | association          | intact | EBI-1139210 |
| Escherichia coli | association          | intact | EBI-1140746 |
| Escherichia coli | association          | intact | EBI-1140807 |
| Escherichia coli | association          | intact | EBI-1140820 |
| Escherichia coli | association          | intact | EBI-890990  |
| Escherichia coli | association          | intact | EBI-1144775 |
| Escherichia coli | association          | intact | EBI-1145830 |
| Escherichia coli | association          | intact | EBI-1144330 |
| Escherichia coli | association          | intact | EBI-885106  |
| Escherichia coli | association          | intact | EBI-893878  |
| Escherichia coli | association          | intact | EBI-1147698 |
| Escherichia coli | association          | intact | EBI-1143152 |
| Escherichia coli | association          | intact | EBI-1139991 |
| Escherichia coli | association          | intact | EBI-889451  |
| Escherichia coli | physical association | intact | EBI-1146186 |
| Escherichia coli | association          | intact | EBI-1140113 |
| Escherichia coli | association          | intact | EBI-1138389 |
| Escherichia coli | physical association | intact | EBI-1146201 |
| Escherichia coli | association          | intact | EBI-1140107 |
| Escherichia coli | association          | intact | EBI-1147840 |
| Escherichia coli | association          | intact | EBI-1138734 |
| Escherichia coli | association          | intact | EBI-1144661 |

|                  |                      |        |             |
|------------------|----------------------|--------|-------------|
| Escherichia coli | association          | intact | EBI-889622  |
| Escherichia coli | association          | intact | EBI-894594  |
| Escherichia coli | association          | intact | EBI-1141171 |
| Escherichia coli | association          | intact | EBI-1141452 |
| Escherichia coli | association          | intact | EBI-1141036 |
| Escherichia coli | physical association | intact | EBI-765077  |
| Escherichia coli | association          | intact | EBI-1137587 |
| Escherichia coli | association          | intact | EBI-1141281 |
| Escherichia coli | association          | intact | EBI-1138588 |
| Escherichia coli | association          | intact | EBI-1138562 |
| Escherichia coli | association          | intact | EBI-1141837 |
| Escherichia coli | physical association | intact | EBI-1141682 |
| Escherichia coli | association          | intact | EBI-1137900 |
| Escherichia coli | physical association | intact | EBI-1138400 |
| Escherichia coli | association          | intact | EBI-1145313 |
| Escherichia coli | association          | intact | EBI-1136338 |
| Escherichia coli | physical association | intact | EBI-1139437 |
| Escherichia coli | association          | intact | EBI-1147386 |
| Escherichia coli | association          | intact | EBI-1146450 |
| Escherichia coli | association          | intact | EBI-1139291 |
| Escherichia coli | association          | intact | EBI-1136818 |
| Escherichia coli | association          | intact | EBI-1147492 |
| Escherichia coli | association          | intact | EBI-1144880 |
| Escherichia coli | association          | intact | EBI-1136976 |
| Escherichia coli | association          | intact | EBI-1136995 |
| Escherichia coli | association          | intact | EBI-1137002 |
| Escherichia coli | association          | intact | EBI-1142821 |
| Escherichia coli | association          | intact | EBI-1144272 |
| Escherichia coli | association          | intact | EBI-1140357 |
| Escherichia coli | association          | intact | EBI-1137163 |
| Escherichia coli | physical association | intact | EBI-1135476 |
| Escherichia coli | association          | intact | EBI-1141251 |
| Escherichia coli | association          | intact | EBI-1137028 |
| Escherichia coli | association          | intact | EBI-1136229 |
| Escherichia coli | association          | intact | EBI-1138324 |
| Escherichia coli | association          | intact | EBI-1145345 |
| Escherichia coli | association          | intact | EBI-1137857 |
| Escherichia coli | association          | intact | EBI-1140532 |
| Escherichia coli | association          | intact | EBI-1146046 |
| Escherichia coli | association          | intact | EBI-1138211 |
| Escherichia coli | association          | intact | EBI-1137650 |

|                  |                      |        |             |
|------------------|----------------------|--------|-------------|
| Escherichia coli | association          | intact | EBI-1147527 |
| Escherichia coli | association          | intact | EBI-1140682 |
| Escherichia coli | association          | intact | EBI-1142209 |
| Escherichia coli | association          | intact | EBI-1141871 |
| Escherichia coli | association          | intact | EBI-1143003 |
| Escherichia coli | association          | intact | EBI-1136185 |
| Escherichia coli | association          | intact | EBI-1144239 |
| Escherichia coli | physical association | intact | EBI-1140287 |
| Escherichia coli | association          | intact | EBI-1137925 |
| Escherichia coli | association          | intact | EBI-1137929 |
| Escherichia coli | association          | intact | EBI-1140568 |
| Escherichia coli | association          | intact | EBI-1137227 |
| Escherichia coli | association          | intact | EBI-1135667 |
| Escherichia coli | association          | intact | EBI-1138573 |
| Escherichia coli | association          | intact | EBI-1146553 |
| Escherichia coli | association          | intact | EBI-1144661 |
| Escherichia coli | association          | intact | EBI-1147540 |
| Escherichia coli | association          | intact | EBI-1141216 |
| Escherichia coli | association          | intact | EBI-1141171 |
| Escherichia coli | association          | intact | EBI-1141189 |
| Escherichia coli | association          | intact | EBI-1141166 |
| Escherichia coli | association          | intact | EBI-1137791 |
| Escherichia coli | association          | intact | EBI-1138254 |
| Escherichia coli | association          | intact | EBI-1143404 |
| Escherichia coli | association          | intact | EBI-1138244 |
| Escherichia coli | association          | intact | EBI-1136646 |
| Escherichia coli | association          | intact | EBI-1141127 |
| Escherichia coli | association          | intact | EBI-1136290 |
| Escherichia coli | association          | intact | EBI-1137610 |
| Escherichia coli | association          | intact | EBI-1144031 |
| Escherichia coli | association          | intact | EBI-1140146 |
| Escherichia coli | association          | intact | EBI-1140933 |
| Escherichia coli | association          | intact | EBI-1140130 |
| Escherichia coli | association          | intact | EBI-1137207 |
| Escherichia coli | association          | intact | EBI-1147520 |
| Escherichia coli | physical association | intact | EBI-1146234 |
| Escherichia coli | physical association | intact | EBI-1145699 |
| Escherichia coli | association          | intact | EBI-1142744 |
| Escherichia coli | association          | intact | EBI-1142768 |
| Escherichia coli | association          | intact | EBI-1142999 |
| Escherichia coli | association          | intact | EBI-1136666 |
| Escherichia coli | association          | intact | EBI-1137711 |
| Escherichia coli | association          | intact | EBI-1136403 |
| Escherichia coli | association          | intact | EBI-1139965 |
| Escherichia coli | association          | intact | EBI-1147944 |

|                  |                      |        |             |
|------------------|----------------------|--------|-------------|
| Escherichia coli | association          | intact | EBI-1142024 |
| Escherichia coli | physical association | intact | EBI-1137796 |
| Escherichia coli | association          | intact | EBI-1146392 |
| Escherichia coli | association          | intact | EBI-1138046 |
| Escherichia coli | association          | intact | EBI-1138294 |
| Escherichia coli | association          | intact | EBI-883418  |
| Escherichia coli | association          | intact | EBI-1144206 |
| Escherichia coli | association          | intact | EBI-1141023 |
| Escherichia coli | association          | intact | EBI-887996  |
| Escherichia coli | association          | intact | EBI-1137778 |
| Escherichia coli | association          | intact | EBI-1143906 |
| Escherichia coli | association          | intact | EBI-1137295 |
| Escherichia coli | association          | intact | EBI-1137280 |
| Escherichia coli | association          | intact | EBI-1137287 |
| Escherichia coli | association          | intact | EBI-1142841 |
| Escherichia coli | association          | intact | EBI-1142869 |
| Escherichia coli | association          | intact | EBI-1138831 |
| Escherichia coli | association          | intact | EBI-1138826 |
| Escherichia coli | association          | intact | EBI-1146787 |
| Escherichia coli | physical association | intact | EBI-1142678 |
| Escherichia coli | association          | intact | EBI-1146889 |
| Escherichia coli | association          | intact | EBI-1146913 |
| Escherichia coli | association          | intact | EBI-1147065 |
| Escherichia coli | association          | intact | EBI-1137265 |
| Escherichia coli | association          | intact | EBI-1137252 |
| Escherichia coli | association          | intact | EBI-1135409 |
| Escherichia coli | association          | intact | EBI-1135432 |
| Escherichia coli | association          | intact | EBI-1144218 |
| Escherichia coli | association          | intact | EBI-1138768 |
| Escherichia coli | physical association | intact | EBI-1138775 |
| Escherichia coli | association          | intact | EBI-1138778 |
| Escherichia coli | association          | intact | EBI-1138783 |
| Escherichia coli | association          | intact | EBI-1141229 |
| Escherichia coli | association          | intact | EBI-1141359 |
| Escherichia coli | association          | intact | EBI-1141425 |
| Escherichia coli | association          | intact | EBI-1141452 |
| Escherichia coli | association          | intact | EBI-1141461 |
| Escherichia coli | association          | intact | EBI-1141372 |
| Escherichia coli | association          | intact | EBI-1140172 |
| Escherichia coli | association          | intact | EBI-1139571 |
| Escherichia coli | association          | intact | EBI-1142533 |
| Escherichia coli | association          | intact | EBI-1137095 |
| Escherichia coli | association          | intact | EBI-1146778 |
| Escherichia coli | association          | intact | EBI-1145702 |
| Escherichia coli | association          | intact | EBI-1135523 |

|                  |                      |        |             |
|------------------|----------------------|--------|-------------|
| Escherichia coli | association          | intact | EBI-1141256 |
| Escherichia coli | association          | intact | EBI-1143992 |
| Escherichia coli | association          | intact | EBI-1140259 |
| Escherichia coli | physical association | intact | EBI-1137685 |
| Escherichia coli | association          | intact | EBI-1143600 |
| Escherichia coli | physical association | intact | EBI-1137877 |
| Escherichia coli | association          | intact | EBI-1137880 |
| Escherichia coli | association          | intact | EBI-1141725 |
| Escherichia coli | association          | intact | EBI-1137872 |
| Escherichia coli | association          | intact | EBI-1144847 |
| Escherichia coli | association          | intact | EBI-1141898 |
| Escherichia coli | association          | intact | EBI-1141888 |
| Escherichia coli | association          | intact | EBI-1144247 |
| Escherichia coli | association          | intact | EBI-1141693 |
| Escherichia coli | association          | intact | EBI-1142711 |
| Escherichia coli | association          | intact | EBI-1143235 |
| Escherichia coli | association          | intact | EBI-1135754 |
| Escherichia coli | association          | intact | EBI-1145859 |
| Escherichia coli | association          | intact | EBI-1147071 |
| Escherichia coli | association          | intact | EBI-1138177 |
| Escherichia coli | association          | intact | EBI-1140371 |
| Escherichia coli | association          | intact | EBI-1136971 |
| Escherichia coli | association          | intact | EBI-1146237 |
| Escherichia coli | association          | intact | EBI-1145733 |
| Escherichia coli | association          | intact | EBI-1137861 |
| Escherichia coli | association          | intact | EBI-1146250 |
| Escherichia coli | association          | intact | EBI-1145055 |
| Escherichia coli | association          | intact | EBI-1145815 |
| Escherichia coli | association          | intact | EBI-1143469 |
| Escherichia coli | physical association | intact | EBI-1144396 |
| Escherichia coli | physical association | intact | EBI-1146043 |
| Escherichia coli | association          | intact | EBI-1144499 |
| Escherichia coli | association          | intact | EBI-1143063 |
| Escherichia coli | association          | intact | EBI-1143961 |
| Escherichia coli | association          | intact | EBI-1143209 |
| Escherichia coli | association          | intact | EBI-1141522 |
| Escherichia coli | physical association | intact | EBI-1142825 |
| Escherichia coli | association          | intact | EBI-1138875 |
| Escherichia coli | association          | intact | EBI-1143229 |
| Escherichia coli | association          | intact | EBI-1138862 |
| Escherichia coli | association          | intact | EBI-1140965 |
| Escherichia coli | association          | intact | EBI-1138515 |
| Escherichia coli | association          | intact | EBI-1138525 |
| Escherichia coli | association          | intact | EBI-1136963 |
| Escherichia coli | association          | intact | EBI-1138992 |

|                  |                      |        |             |
|------------------|----------------------|--------|-------------|
| Escherichia coli | association          | intact | EBI-1138266 |
| Escherichia coli | association          | intact | EBI-1140585 |
| Escherichia coli | association          | intact | EBI-1136828 |
| Escherichia coli | association          | intact | EBI-1136409 |
| Escherichia coli | association          | intact | EBI-1143160 |
| Escherichia coli | association          | intact | EBI-1147123 |
| Escherichia coli | association          | intact | EBI-1144887 |
| Escherichia coli | association          | intact | EBI-1138328 |
| Escherichia coli | association          | intact | EBI-1138355 |
| Escherichia coli | association          | intact | EBI-1144139 |
| Escherichia coli | association          | intact | EBI-1140456 |
| Escherichia coli | association          | intact | EBI-1139724 |
| Escherichia coli | association          | intact | EBI-1135508 |
| Escherichia coli | association          | intact | EBI-1137482 |
| Escherichia coli | association          | intact | EBI-1136659 |
| Escherichia coli | physical association | intact | EBI-1145134 |
| Escherichia coli | association          | intact | EBI-1138286 |
| Escherichia coli | physical association | intact | EBI-1140033 |
| Escherichia coli | association          | intact | EBI-1140007 |
| Escherichia coli | physical association | intact | EBI-1138216 |
| Escherichia coli | association          | intact | EBI-1140263 |
| Escherichia coli | association          | intact | EBI-1141763 |
| Escherichia coli | physical association | intact | EBI-1142921 |
| Escherichia coli | association          | intact | EBI-1144520 |
| Escherichia coli | association          | intact | EBI-1144528 |
| Escherichia coli | association          | intact | EBI-1142375 |
| Escherichia coli | association          | intact | EBI-1142369 |
| Escherichia coli | association          | intact | EBI-1142364 |
| Escherichia coli | association          | intact | EBI-1142385 |
| Escherichia coli | physical association | intact | EBI-1147115 |
| Escherichia coli | association          | intact | EBI-1144372 |
| Escherichia coli | association          | intact | EBI-1136321 |
| Escherichia coli | association          | intact | EBI-1136333 |
| Escherichia coli | association          | intact | EBI-1139067 |
| Escherichia coli | association          | intact | EBI-1140351 |
| Escherichia coli | association          | intact | EBI-1136026 |
| Escherichia coli | association          | intact | EBI-1138978 |
| Escherichia coli | association          | intact | EBI-1137952 |
| Escherichia coli | association          | intact | EBI-1137964 |
| Escherichia coli | association          | intact | EBI-1137971 |
| Escherichia coli | association          | intact | EBI-1137983 |
| Escherichia coli | association          | intact | EBI-1138140 |
| Escherichia coli | association          | intact | EBI-1138129 |
| Escherichia coli | association          | intact | EBI-1141490 |
| Escherichia coli | association          | intact | EBI-1141957 |

|                  |                      |        |             |
|------------------|----------------------|--------|-------------|
| Escherichia coli | association          | intact | EBI-1141533 |
| Escherichia coli | association          | intact | EBI-1145112 |
| Escherichia coli | association          | intact | EBI-1135536 |
| Escherichia coli | association          | intact | EBI-1135540 |
| Escherichia coli | association          | intact | EBI-1142783 |
| Escherichia coli | association          | intact | EBI-1137852 |
| Escherichia coli | association          | intact | EBI-1137668 |
| Escherichia coli | association          | intact | EBI-1137674 |
| Escherichia coli | association          | intact | EBI-1138911 |
| Escherichia coli | association          | intact | EBI-1145187 |
| Escherichia coli | association          | intact | EBI-1139225 |
| Escherichia coli | association          | intact | EBI-1139917 |
| Escherichia coli | association          | intact | EBI-1145830 |
| Escherichia coli | association          | intact | EBI-1139901 |
| Escherichia coli | association          | intact | EBI-1146441 |
| Escherichia coli | association          | intact | EBI-1142993 |
| Escherichia coli | association          | intact | EBI-1137155 |
| Escherichia coli | association          | intact | EBI-1143718 |
| Escherichia coli | physical association | intact | EBI-1147734 |
| Escherichia coli | association          | intact | EBI-1143635 |
| Escherichia coli | association          | intact | EBI-1136500 |
| Escherichia coli | association          | intact | EBI-1147393 |
| Escherichia coli | association          | intact | EBI-1147403 |
| Escherichia coli | association          | intact | EBI-1141105 |
| Escherichia coli | association          | intact | EBI-1140708 |
| Escherichia coli | association          | intact | EBI-1136512 |
| Escherichia coli | association          | intact | EBI-1139302 |
| Escherichia coli | association          | intact | EBI-1141994 |
| Escherichia coli | association          | intact | EBI-1147760 |
| Escherichia coli | association          | intact | EBI-1141241 |
| Escherichia coli | association          | intact | EBI-1142672 |
| Escherichia coli | association          | intact | EBI-1136420 |
| Escherichia coli | association          | intact | EBI-1139751 |
| Escherichia coli | association          | intact | EBI-1136564 |
| Escherichia coli | association          | intact | EBI-1142551 |
| Escherichia coli | association          | intact | EBI-1138943 |
| Escherichia coli | association          | intact | EBI-1138307 |
| Escherichia coli | association          | intact | EBI-1138311 |
| Escherichia coli | physical association | intact | EBI-1137708 |
| Escherichia coli | association          | intact | EBI-1136460 |
| Escherichia coli | association          | intact | EBI-1138966 |
| Escherichia coli | association          | intact | EBI-1138406 |
| Escherichia coli | association          | intact | EBI-1138219 |
| Escherichia coli | association          | intact | EBI-1139876 |
| Escherichia coli | association          | intact | EBI-1143057 |



|                  |                      |        |             |
|------------------|----------------------|--------|-------------|
| Escherichia coli | association          | intact | EBI-1145321 |
| Escherichia coli | association          | intact | EBI-1136261 |
| Escherichia coli | association          | intact | EBI-1136274 |
| Escherichia coli | association          | intact | EBI-1136278 |
| Escherichia coli | association          | intact | EBI-1142065 |
| Escherichia coli | association          | intact | EBI-1142078 |
| Escherichia coli | association          | intact | EBI-1142752 |
| Escherichia coli | association          | intact | EBI-1142480 |
| Escherichia coli | physical association | intact | EBI-1147129 |
| Escherichia coli | association          | intact | EBI-1144067 |
| Escherichia coli | association          | intact | EBI-1138972 |
| Escherichia coli | association          | intact | EBI-1147268 |
| Escherichia coli | association          | intact | EBI-1137040 |
| Escherichia coli | association          | intact | EBI-1137033 |
| Escherichia coli | association          | intact | EBI-1141007 |
| Escherichia coli | association          | intact | EBI-1139510 |
| Escherichia coli | association          | intact | EBI-1138734 |
| Escherichia coli | association          | intact | EBI-1143918 |
| Escherichia coli | association          | intact | EBI-1147688 |
| Escherichia coli | association          | intact | EBI-1136475 |
| Escherichia coli | association          | intact | EBI-1139646 |
| Escherichia coli | physical association | intact | EBI-1144993 |
| Escherichia coli | association          | intact | EBI-1146638 |
| Escherichia coli | association          | intact | EBI-1143694 |
| Escherichia coli | association          | intact | EBI-1146417 |
| Escherichia coli | association          | intact | EBI-1140165 |
| Escherichia coli | association          | intact | EBI-1139187 |
| Escherichia coli | association          | intact | EBI-1146766 |
| Escherichia coli | association          | intact | EBI-1138014 |
| Escherichia coli | association          | intact | EBI-1142317 |
| Escherichia coli | association          | intact | EBI-1136506 |
| Escherichia coli | association          | intact | EBI-1135327 |
| Escherichia coli | association          | intact | EBI-1137587 |
| Escherichia coli | association          | intact | EBI-1142059 |
| Escherichia coli | association          | intact | EBI-1138150 |
| Escherichia coli | association          | intact | EBI-1147159 |
| Escherichia coli | association          | intact | EBI-1145084 |
| Escherichia coli | association          | intact | EBI-1145517 |
| Escherichia coli | association          | intact | EBI-1138445 |
| Escherichia coli | association          | intact | EBI-1143090 |
| Escherichia coli | association          | intact | EBI-1147310 |
| Escherichia coli | association          | intact | EBI-1141703 |
| Escherichia coli | association          | intact | EBI-1141720 |
| Escherichia coli | association          | intact | EBI-1139475 |
| Escherichia coli | association          | intact | EBI-1137410 |

|                  |                      |        |             |
|------------------|----------------------|--------|-------------|
| Escherichia coli | association          | intact | EBI-1144702 |
| Escherichia coli | association          | intact | EBI-1144972 |
| Escherichia coli | association          | intact | EBI-1143455 |
| Escherichia coli | association          | intact | EBI-1147905 |
| Escherichia coli | association          | intact | EBI-1138195 |
| Escherichia coli | association          | intact | EBI-1138614 |
| Escherichia coli | association          | intact | EBI-1138605 |
| Escherichia coli | association          | intact | EBI-1141081 |
| Escherichia coli | association          | intact | EBI-1136455 |
| Escherichia coli | association          | intact | EBI-1142657 |
| Escherichia coli | association          | intact | EBI-1140712 |
| Escherichia coli | physical association | intact | EBI-1147974 |
| Escherichia coli | association          | intact | EBI-1138319 |
| Escherichia coli | association          | intact | EBI-1142034 |
| Escherichia coli | association          | intact | EBI-1138362 |
| Escherichia coli | association          | intact | EBI-1144358 |
| Escherichia coli | association          | intact | EBI-1144351 |
| Escherichia coli | association          | intact | EBI-1142107 |
| Escherichia coli | association          | intact | EBI-1138427 |
| Escherichia coli | association          | intact | EBI-1147006 |
| Escherichia coli | association          | intact | EBI-1140500 |
| Escherichia coli | association          | intact | EBI-1140476 |
| Escherichia coli | association          | intact | EBI-1143175 |
| Escherichia coli | association          | intact | EBI-1138108 |
| Escherichia coli | association          | intact | EBI-1137091 |
| Escherichia coli | association          | intact | EBI-1141111 |
| Escherichia coli | association          | intact | EBI-1144197 |
| Escherichia coli | physical association | intact | EBI-1138403 |
| Escherichia coli | association          | intact | EBI-1140596 |
| Escherichia coli | association          | intact | EBI-1145723 |
| Escherichia coli | association          | intact | EBI-1140336 |
| Escherichia coli | association          | intact | EBI-1147889 |
| Escherichia coli | association          | intact | EBI-1142924 |
| Escherichia coli | association          | intact | EBI-1146260 |
| Escherichia coli | association          | intact | EBI-1136733 |
| Escherichia coli | association          | intact | EBI-1136481 |
| Escherichia coli | association          | intact | EBI-1147211 |
| Escherichia coli | association          | intact | EBI-1136521 |
| Escherichia coli | association          | intact | EBI-1136591 |
| Escherichia coli | association          | intact | EBI-1145280 |
| Escherichia coli | association          | intact | EBI-1147737 |
| Escherichia coli | association          | intact | EBI-1139344 |
| Escherichia coli | association          | intact | EBI-1139350 |
| Escherichia coli | association          | intact | EBI-1139357 |
| Escherichia coli | association          | intact | EBI-1139361 |

|                  |                      |        |             |
|------------------|----------------------|--------|-------------|
| Escherichia coli | physical association | intact | EBI-1138283 |
| Escherichia coli | association          | intact | EBI-1145987 |
| Escherichia coli | association          | intact | EBI-1137645 |
| Escherichia coli | association          | intact | EBI-1139703 |
| Escherichia coli | association          | intact | EBI-1138463 |
| Escherichia coli | association          | intact | EBI-1140036 |
| Escherichia coli | association          | intact | EBI-1144798 |
| Escherichia coli | physical association | intact | EBI-1147861 |
| Escherichia coli | association          | intact | EBI-1147864 |
| Escherichia coli | association          | intact | EBI-1139002 |
| Escherichia coli | association          | intact | EBI-1136374 |
| Escherichia coli | association          | intact | EBI-1141792 |
| Escherichia coli | association          | intact | EBI-1142735 |
| Escherichia coli | association          | intact | EBI-1135576 |
| Escherichia coli | association          | intact | EBI-1135971 |
| Escherichia coli | association          | intact | EBI-1136132 |
| Escherichia coli | association          | intact | EBI-1136204 |
| Escherichia coli | association          | intact | EBI-1136211 |
| Escherichia coli | association          | intact | EBI-1136223 |
| Escherichia coli | association          | intact | EBI-1136242 |
| Escherichia coli | association          | intact | EBI-1136246 |
| Escherichia coli | association          | intact | EBI-1136432 |
| Escherichia coli | association          | intact | EBI-1136353 |
| Escherichia coli | association          | intact | EBI-1136531 |
| Escherichia coli | association          | intact | EBI-1136788 |
| Escherichia coli | association          | intact | EBI-1136842 |
| Escherichia coli | association          | intact | EBI-1136902 |
| Escherichia coli | physical association | intact | EBI-1137149 |
| Escherichia coli | physical association | intact | EBI-1137320 |
| Escherichia coli | association          | intact | EBI-1137323 |
| Escherichia coli | association          | intact | EBI-1137330 |
| Escherichia coli | association          | intact | EBI-1137336 |
| Escherichia coli | association          | intact | EBI-1137343 |
| Escherichia coli | association          | intact | EBI-1137495 |
| Escherichia coli | association          | intact | EBI-1137539 |
| Escherichia coli | association          | intact | EBI-1137770 |
| Escherichia coli | association          | intact | EBI-1137943 |
| Escherichia coli | association          | intact | EBI-1137995 |
| Escherichia coli | association          | intact | EBI-1138038 |
| Escherichia coli | association          | intact | EBI-1138059 |
| Escherichia coli | association          | intact | EBI-1138593 |
| Escherichia coli | association          | intact | EBI-1138650 |
| Escherichia coli | association          | intact | EBI-1138667 |
| Escherichia coli | association          | intact | EBI-1138867 |
| Escherichia coli | association          | intact | EBI-1139089 |

|                  |                      |        |             |
|------------------|----------------------|--------|-------------|
| Escherichia coli | association          | intact | EBI-1139137 |
| Escherichia coli | association          | intact | EBI-1139210 |
| Escherichia coli | association          | intact | EBI-1139321 |
| Escherichia coli | physical association | intact | EBI-1139328 |
| Escherichia coli | association          | intact | EBI-1139338 |
| Escherichia coli | association          | intact | EBI-1139308 |
| Escherichia coli | association          | intact | EBI-1139419 |
| Escherichia coli | association          | intact | EBI-1139466 |
| Escherichia coli | association          | intact | EBI-1139537 |
| Escherichia coli | association          | intact | EBI-1139627 |
| Escherichia coli | association          | intact | EBI-1139658 |
| Escherichia coli | association          | intact | EBI-1139674 |
| Escherichia coli | association          | intact | EBI-1139910 |
| Escherichia coli | association          | intact | EBI-1140084 |
| Escherichia coli | association          | intact | EBI-1140191 |
| Escherichia coli | association          | intact | EBI-1140096 |
| Escherichia coli | association          | intact | EBI-1140414 |
| Escherichia coli | physical association | intact | EBI-1140430 |
| Escherichia coli | association          | intact | EBI-1140446 |
| Escherichia coli | association          | intact | EBI-1140539 |
| Escherichia coli | association          | intact | EBI-1140517 |
| Escherichia coli | association          | intact | EBI-1140770 |
| Escherichia coli | association          | intact | EBI-1140787 |
| Escherichia coli | association          | intact | EBI-1140791 |
| Escherichia coli | association          | intact | EBI-1140803 |
| Escherichia coli | association          | intact | EBI-1140807 |
| Escherichia coli | association          | intact | EBI-1140837 |
| Escherichia coli | association          | intact | EBI-1140845 |
| Escherichia coli | association          | intact | EBI-1141091 |
| Escherichia coli | association          | intact | EBI-1140995 |
| Escherichia coli | association          | intact | EBI-1141314 |
| Escherichia coli | association          | intact | EBI-1141277 |
| Escherichia coli | association          | intact | EBI-1141261 |
| Escherichia coli | association          | intact | EBI-1141389 |
| Escherichia coli | association          | intact | EBI-1141395 |
| Escherichia coli | association          | intact | EBI-1141414 |
| Escherichia coli | physical association | intact | EBI-1141615 |
| Escherichia coli | association          | intact | EBI-1141618 |
| Escherichia coli | association          | intact | EBI-1141862 |
| Escherichia coli | association          | intact | EBI-1141881 |
| Escherichia coli | association          | intact | EBI-1141921 |
| Escherichia coli | association          | intact | EBI-1141926 |
| Escherichia coli | association          | intact | EBI-1142127 |
| Escherichia coli | association          | intact | EBI-1142574 |
| Escherichia coli | association          | intact | EBI-1142588 |

|                  |                      |        |             |
|------------------|----------------------|--------|-------------|
| Escherichia coli | association          | intact | EBI-1142665 |
| Escherichia coli | association          | intact | EBI-1142689 |
| Escherichia coli | association          | intact | EBI-1142802 |
| Escherichia coli | association          | intact | EBI-1143031 |
| Escherichia coli | association          | intact | EBI-1143243 |
| Escherichia coli | association          | intact | EBI-1143262 |
| Escherichia coli | association          | intact | EBI-1143701 |
| Escherichia coli | association          | intact | EBI-1143850 |
| Escherichia coli | physical association | intact | EBI-1144036 |
| Escherichia coli | association          | intact | EBI-1144233 |
| Escherichia coli | association          | intact | EBI-1144435 |
| Escherichia coli | association          | intact | EBI-1144655 |
| Escherichia coli | physical association | intact | EBI-1144590 |
| Escherichia coli | association          | intact | EBI-1145047 |
| Escherichia coli | association          | intact | EBI-1145166 |
| Escherichia coli | association          | intact | EBI-1145259 |
| Escherichia coli | association          | intact | EBI-1145671 |
| Escherichia coli | association          | intact | EBI-1145709 |
| Escherichia coli | association          | intact | EBI-1146016 |
| Escherichia coli | association          | intact | EBI-1146034 |
| Escherichia coli | association          | intact | EBI-1146870 |
| Escherichia coli | association          | intact | EBI-1146877 |
| Escherichia coli | association          | intact | EBI-1147040 |
| Escherichia coli | association          | intact | EBI-1147273 |
| Escherichia coli | physical association | intact | EBI-1147329 |
| Escherichia coli | association          | intact | EBI-1147381 |
| Escherichia coli | association          | intact | EBI-1147604 |
| Escherichia coli | association          | intact | EBI-1147779 |
| Escherichia coli | physical association | intact | EBI-1147982 |
| Escherichia coli | association          | intact | EBI-1136986 |
| Escherichia coli | association          | intact | EBI-1139487 |
| Escherichia coli | association          | intact | EBI-1139670 |
| Escherichia coli | association          | intact | EBI-1140958 |
| Escherichia coli | association          | intact | EBI-1140972 |
| Escherichia coli | association          | intact | EBI-1142009 |
| Escherichia coli | association          | intact | EBI-1142702 |
| Escherichia coli | association          | intact | EBI-1144810 |
| Escherichia coli | association          | intact | EBI-1144912 |
| Escherichia coli | association          | intact | EBI-1145119 |
| Escherichia coli | association          | intact | EBI-1145913 |
| Escherichia coli | association          | intact | EBI-1146450 |
| Escherichia coli | association          | intact | EBI-1141152 |
| Escherichia coli | association          | intact | EBI-1136570 |
| Escherichia coli | association          | intact | EBI-1137265 |

|                  |                      |        |             |
|------------------|----------------------|--------|-------------|
| Escherichia coli | association          | intact | EBI-1145176 |
| Escherichia coli | association          | intact | EBI-1136432 |
| Escherichia coli | association          | intact | EBI-1144289 |
| Escherichia coli | association          | intact | EBI-1138841 |
| Escherichia coli | association          | intact | EBI-1142149 |
| Escherichia coli | association          | intact | EBI-1147221 |
| Escherichia coli | association          | intact | EBI-1140036 |
| Escherichia coli | association          | intact | EBI-885524  |
| Escherichia coli | association          | intact | EBI-884584  |
| Escherichia coli | association          | intact | EBI-883621  |
| Escherichia coli | association          | intact | EBI-1137559 |
| Escherichia coli | association          | intact | EBI-880782  |
| Escherichia coli | association          | intact | EBI-888239  |
| Escherichia coli | physical association | intact | EBI-906696  |
| Escherichia coli | association          | intact | EBI-880342  |
| Escherichia coli | association          | intact | EBI-885754  |
| Escherichia coli | association          | intact | EBI-880352  |
| Escherichia coli | association          | intact | EBI-885776  |
| Escherichia coli | association          | intact | EBI-880282  |
| Escherichia coli | association          | intact | EBI-885632  |
| Escherichia coli | association          | intact | EBI-880251  |
| Escherichia coli | association          | intact | EBI-1139928 |
| Escherichia coli | association          | intact | EBI-878876  |
| Escherichia coli | association          | intact | EBI-1143250 |
| Escherichia coli | association          | intact | EBI-886413  |
| Escherichia coli | association          | intact | EBI-1147356 |
| Escherichia coli | association          | intact | EBI-1135423 |
| Escherichia coli | association          | intact | EBI-1136956 |
| Escherichia coli | physical association | intact | EBI-1041511 |
| Escherichia coli | physical association | intact | EBI-1041525 |
| Escherichia coli | physical association | intact | EBI-1041539 |
| Escherichia coli | physical association | intact | EBI-1041553 |
| Escherichia coli | physical association | intact | EBI-1037008 |
| Escherichia coli | physical association | intact | EBI-1038777 |
| Escherichia coli | association          | intact | EBI-880352  |
| Escherichia coli | association          | intact | EBI-885776  |
| Escherichia coli | association          | intact | EBI-880282  |
| Escherichia coli | association          | intact | EBI-885557  |
| Escherichia coli | physical association | intact | EBI-880275  |
| Escherichia coli | physical association | intact | EBI-885614  |

|                  |                      |        |             |
|------------------|----------------------|--------|-------------|
| Escherichia coli | association          | intact | EBI-1142078 |
| Escherichia coli | association          | intact | EBI-880367  |
| Escherichia coli | physical association | intact | EBI-885808  |
| Escherichia coli | association          | intact | EBI-1142893 |
| Escherichia coli | association          | intact | EBI-1142937 |
| Escherichia coli | association          | intact | EBI-1146120 |
| Escherichia coli | association          | intact | EBI-1145762 |
| Escherichia coli | association          | intact | EBI-1136666 |
| Escherichia coli | association          | intact | EBI-1145244 |
| Escherichia coli | association          | intact | EBI-1139015 |
| Escherichia coli | association          | intact | EBI-1140650 |
| Escherichia coli | association          | intact | EBI-1138014 |
| Escherichia coli | association          | intact | EBI-1145472 |
| Escherichia coli | association          | intact | EBI-1135792 |
| Escherichia coli | association          | intact | EBI-1143500 |
| Escherichia coli | association          | intact | EBI-1146034 |
| Escherichia coli | association          | intact | EBI-1140044 |
| Escherichia coli | physical association | intact | EBI-2369752 |
| Escherichia coli | association          | intact | EBI-1147901 |
| Escherichia coli | physical association | intact | EBI-2369696 |
| Escherichia coli | physical association | intact | EBI-2369641 |
| Escherichia coli | association          | intact | EBI-892247  |
| Escherichia coli | association          | intact | EBI-1135423 |
| Escherichia coli | association          | intact | EBI-1146220 |
| Escherichia coli | physical association | intact | EBI-2012343 |
| Escherichia coli | physical association | intact | EBI-2012330 |
| Escherichia coli | physical association | intact | EBI-2012351 |
| Escherichia coli | association          | intact | EBI-1139979 |

|                  |                      |        |             |
|------------------|----------------------|--------|-------------|
| Escherichia coli | association          | intact | EBI-1136918 |
| Escherichia coli | association          | intact | EBI-2463360 |
| Escherichia coli | association          | intact | EBI-1138129 |
| Escherichia coli | association          | intact | EBI-880782  |
| Escherichia coli | association          | intact | EBI-888239  |
| Escherichia coli | association          | intact | EBI-885288  |
| Escherichia coli | association          | intact | EBI-1137234 |
| Escherichia coli | association          | intact | EBI-1140303 |
| Escherichia coli | association          | intact | EBI-1142433 |
| Escherichia coli | association          | intact | EBI-1141819 |
| Escherichia coli | association          | intact | EBI-1137919 |
| Escherichia coli | association          | intact | EBI-1147548 |
| Escherichia coli | association          | intact | EBI-1139431 |
| Escherichia coli | association          | intact | EBI-1141452 |
| Escherichia coli | association          | intact | EBI-1141898 |
| Escherichia coli | association          | intact | EBI-1143961 |
| Escherichia coli | association          | intact | EBI-1137559 |
| Escherichia coli | association          | intact | EBI-1138503 |
| Escherichia coli | association          | intact | EBI-1144135 |
| Escherichia coli | association          | intact | EBI-1140007 |
| Escherichia coli | association          | intact | EBI-1143661 |
| Escherichia coli | association          | intact | EBI-1141045 |
| Escherichia coli | association          | intact | EBI-1142158 |
| Escherichia coli | association          | intact | EBI-1145830 |
| Escherichia coli | physical association | intact | EBI-1213235 |
| Escherichia coli | association          | intact | EBI-1142433 |
| Escherichia coli | association          | intact | EBI-1142426 |
| Escherichia coli | association          | intact | EBI-1141145 |
| Escherichia coli | association          | intact | EBI-1141940 |
| Escherichia coli | association          | intact | EBI-1139384 |
| Escherichia coli | association          | intact | EBI-882523  |
| Escherichia coli | association          | intact | EBI-1137548 |
| Escherichia coli | association          | intact | EBI-1141876 |
| Escherichia coli | association          | intact | EBI-1141970 |
| Escherichia coli | association          | intact | EBI-1147552 |
| Escherichia coli | association          | intact | EBI-1138683 |



|                  |                      |        |             |
|------------------|----------------------|--------|-------------|
| Escherichia coli | association          | intact | EBI-1144399 |
| Escherichia coli | association          | intact | EBI-1141031 |
| Escherichia coli | association          | intact | EBI-883484  |
| Escherichia coli | association          | intact | EBI-886894  |
| Escherichia coli | association          | intact | EBI-879354  |
| Escherichia coli | association          | intact | EBI-883271  |
| Escherichia coli | association          | intact | EBI-879304  |
| Escherichia coli | association          | intact | EBI-883170  |
| Escherichia coli | association          | intact | EBI-879261  |
| Escherichia coli | association          | intact | EBI-886257  |
| Escherichia coli | association          | intact | EBI-892741  |
| Escherichia coli | association          | intact | EBI-879161  |
| Escherichia coli | association          | intact | EBI-879082  |
| Escherichia coli | physical association | intact | EBI-2623995 |
| Escherichia coli | physical association | intact | EBI-2623979 |
| Escherichia coli | physical association | intact | EBI-2607987 |
| Escherichia coli | association          | intact | EBI-886815  |
| Escherichia coli | association          | intact | EBI-887152  |
| Escherichia coli | association          | intact | EBI-892506  |
| Escherichia coli | association          | intact | EBI-892134  |
| Escherichia coli | association          | intact | EBI-1147774 |
| Escherichia coli | association          | intact | EBI-1145825 |
| Escherichia coli | association          | intact | EBI-880545  |
| Escherichia coli | association          | intact | EBI-886398  |
| Escherichia coli | association          | intact | EBI-1135319 |
| Escherichia coli | association          | intact | EBI-1138471 |
| Escherichia coli | association          | intact | EBI-1147995 |
| Escherichia coli | association          | intact | EBI-1145940 |
| Escherichia coli | association          | intact | EBI-1135572 |
| Escherichia coli | association          | intact | EBI-1147147 |
| Escherichia coli | association          | intact | EBI-1136695 |
| Escherichia coli | association          | intact | EBI-1137818 |
| Escherichia coli | association          | intact | EBI-891999  |
| Escherichia coli | association          | intact | EBI-2463360 |
| Escherichia coli | association          | intact | EBI-887152  |
| Escherichia coli | association          | intact | EBI-1136849 |
| Escherichia coli | association          | intact | EBI-1137911 |
| Escherichia coli | association          | intact | EBI-1137907 |
| Escherichia coli | physical association | intact | EBI-1138386 |
| Escherichia coli | association          | intact | EBI-1139025 |
| Escherichia coli | association          | intact | EBI-1140746 |

|                          |                      |        |             |
|--------------------------|----------------------|--------|-------------|
| Escherichia coli         | association          | intact | EBI-1140766 |
| Escherichia coli         | association          | intact | EBI-1142574 |
| Escherichia coli         | association          | intact | EBI-1145897 |
| Escherichia coli         | association          | intact | EBI-1144912 |
| Escherichia coli O157:H7 | physical association | intact | EBI-1212123 |
| Escherichia coli O157:H7 | association          | intact | EBI-1212182 |
| Escherichia coli         | association          | intact | EBI-878935  |
| Escherichia coli         | association          | intact | EBI-1139739 |
| Escherichia coli         | association          | intact | EBI-1135472 |
| Escherichia coli         | association          | intact | EBI-892208  |
| Escherichia coli         | association          | intact | EBI-882443  |
| Escherichia coli         | association          | intact | EBI-879046  |
| Escherichia coli         | association          | intact | EBI-884584  |
| Escherichia coli         | association          | intact | EBI-1141127 |
| Escherichia coli         | association          | intact | EBI-879628  |
| Escherichia coli         | association          | intact | EBI-879539  |
| Escherichia coli         | association          | intact | EBI-888958  |
| Escherichia coli         | association          | intact | EBI-881486  |
| Escherichia coli         | association          | intact | EBI-1135611 |
| Escherichia coli         | association          | intact | EBI-881035  |
| Escherichia coli         | association          | intact | EBI-885640  |
| Escherichia coli         | association          | intact | EBI-883621  |
| Escherichia coli         | association          | intact | EBI-883824  |
| Escherichia coli         | association          | intact | EBI-894927  |
| Escherichia coli         | association          | intact | EBI-880291  |
| Escherichia coli         | association          | intact | EBI-886164  |
| Escherichia coli         | association          | intact | EBI-879752  |
| Escherichia coli         | association          | intact | EBI-1139936 |
| Escherichia coli         | association          | intact | EBI-881093  |
| Escherichia coli         | physical association | intact | EBI-888719  |
| Escherichia coli         | association          | intact | EBI-1147496 |
| Escherichia coli         | association          | intact | EBI-885224  |
| Escherichia coli         | association          | intact | EBI-883047  |
| Escherichia coli         | association          | intact | EBI-890481  |
| Escherichia coli         | association          | intact | EBI-880223  |
| Escherichia coli         | association          | intact | EBI-884859  |
| Escherichia coli         | physical association | intact | EBI-880015  |
| Escherichia coli         | association          | intact | EBI-880536  |
| Escherichia coli         | association          | intact | EBI-886364  |
| Escherichia coli         | association          | intact | EBI-882847  |
| Escherichia coli         | association          | intact | EBI-881219  |
| Escherichia coli         | association          | intact | EBI-894976  |
| Escherichia coli         | association          | intact | EBI-890013  |
| Escherichia coli         | association          | intact | EBI-1141045 |

|                  |                      |        |             |
|------------------|----------------------|--------|-------------|
| Escherichia coli | association          | intact | EBI-886395  |
| Escherichia coli | association          | intact | EBI-887021  |
| Escherichia coli | association          | intact | EBI-893969  |
| Escherichia coli | association          | intact | EBI-1142937 |
| Escherichia coli | association          | intact | EBI-893117  |
| Escherichia coli | association          | intact | EBI-890521  |
| Escherichia coli | association          | intact | EBI-1135589 |
| Escherichia coli | association          | intact | EBI-887500  |
| Escherichia coli | association          | intact | EBI-888834  |
| Escherichia coli | association          | intact | EBI-1139510 |
| Escherichia coli | association          | intact | EBI-882168  |
| Escherichia coli | association          | intact | EBI-881943  |
| Escherichia coli | association          | intact | EBI-882208  |
| Escherichia coli | association          | intact | EBI-1143946 |
| Escherichia coli | association          | intact | EBI-886554  |
| Escherichia coli | physical association | intact | EBI-889192  |
| Escherichia coli | association          | intact | EBI-885288  |
| Escherichia coli | association          | intact | EBI-878697  |
| Escherichia coli | association          | intact | EBI-882671  |
| Escherichia coli | association          | intact | EBI-881230  |
| Escherichia coli | association          | intact | EBI-879354  |
| Escherichia coli | association          | intact | EBI-886442  |
| Escherichia coli | association          | intact | EBI-880527  |
| Escherichia coli | association          | intact | EBI-886310  |
| Escherichia coli | association          | intact | EBI-1141073 |
| Escherichia coli | association          | intact | EBI-883733  |
| Escherichia coli | association          | intact | EBI-1139684 |
| Escherichia coli | association          | intact | EBI-1147006 |
| Escherichia coli | association          | intact | EBI-888737  |
| Escherichia coli | association          | intact | EBI-1141145 |
| Escherichia coli | association          | intact | EBI-886205  |
| Escherichia coli | association          | intact | EBI-1136591 |
| Escherichia coli | association          | intact | EBI-879057  |
| Escherichia coli | association          | intact | EBI-882273  |
| Escherichia coli | association          | intact | EBI-1139361 |
| Escherichia coli | association          | intact | EBI-888431  |
| Escherichia coli | physical association | intact | EBI-883246  |
| Escherichia coli | association          | intact | EBI-880917  |
| Escherichia coli | association          | intact | EBI-888366  |
| Escherichia coli | physical association | intact | EBI-893046  |
| Escherichia coli | association          | intact | EBI-886646  |
| Escherichia coli | association          | intact | EBI-892986  |
| Escherichia coli | association          | intact | EBI-889250  |
| Escherichia coli | association          | intact | EBI-881743  |
| Escherichia coli | association          | intact | EBI-893901  |

|                  |                      |        |             |
|------------------|----------------------|--------|-------------|
| Escherichia coli | physical association | intact | EBI-888756  |
| Escherichia coli | physical association | intact | EBI-886973  |
| Escherichia coli | association          | intact | EBI-883545  |
| Escherichia coli | association          | intact | EBI-1139780 |
| Escherichia coli | association          | intact | EBI-1140433 |
| Escherichia coli | association          | intact | EBI-881002  |
| Escherichia coli | association          | intact | EBI-1143531 |
| Escherichia coli | association          | intact | EBI-1143866 |
| Escherichia coli | association          | intact | EBI-880398  |
| Escherichia coli | association          | intact | EBI-881807  |
| Escherichia coli | association          | intact | EBI-884186  |
| Escherichia coli | physical association | intact | EBI-891247  |
| Escherichia coli | physical association | intact | EBI-883014  |
| Escherichia coli | association          | intact | EBI-879036  |
| Escherichia coli | association          | intact | EBI-891065  |
| Escherichia coli | association          | intact | EBI-884929  |
| Escherichia coli | association          | intact | EBI-878935  |
| Escherichia coli | association          | intact | EBI-888995  |
| Escherichia coli | association          | intact | EBI-881555  |
| Escherichia coli | association          | intact | EBI-892208  |
| Escherichia coli | association          | intact | EBI-885601  |
| Escherichia coli | association          | intact | EBI-882443  |
| Escherichia coli | association          | intact | EBI-879046  |
| Escherichia coli | association          | intact | EBI-879628  |
| Escherichia coli | association          | intact | EBI-894157  |
| Escherichia coli | physical association | intact | EBI-906611  |
| Escherichia coli | association          | intact | EBI-881199  |
| Escherichia coli | association          | intact | EBI-886164  |
| Escherichia coli | association          | intact | EBI-887941  |
| Escherichia coli | association          | intact | EBI-884206  |
| Escherichia coli | association          | intact | EBI-884859  |
| Escherichia coli | association          | intact | EBI-884833  |
| Escherichia coli | association          | intact | EBI-892341  |
| Escherichia coli | physical association | intact | EBI-889517  |
| Escherichia coli | association          | intact | EBI-886344  |
| Escherichia coli | association          | intact | EBI-889553  |
| Escherichia coli | association          | intact | EBI-894562  |
| Escherichia coli | association          | intact | EBI-892823  |
| Escherichia coli | association          | intact | EBI-885776  |
| Escherichia coli | association          | intact | EBI-893916  |
| Escherichia coli | association          | intact | EBI-888807  |
| Escherichia coli | association          | intact | EBI-882987  |
| Escherichia coli | association          | intact | EBI-1139761 |
| Escherichia coli | association          | intact | EBI-878671  |

|                  |                      |        |             |
|------------------|----------------------|--------|-------------|
| Escherichia coli | association          | intact | EBI-883350  |
| Escherichia coli | association          | intact | EBI-1135589 |
| Escherichia coli | association          | intact | EBI-893285  |
| Escherichia coli | association          | intact | EBI-887500  |
| Escherichia coli | association          | intact | EBI-879973  |
| Escherichia coli | association          | intact | EBI-884958  |
| Escherichia coli | physical association | intact | EBI-882909  |
| Escherichia coli | association          | intact | EBI-879199  |
| Escherichia coli | association          | intact | EBI-889424  |
| Escherichia coli | association          | intact | EBI-1136881 |
| Escherichia coli | physical association | intact | EBI-882119  |
| Escherichia coli | association          | intact | EBI-881943  |
| Escherichia coli | association          | intact | EBI-882208  |
| Escherichia coli | association          | intact | EBI-889737  |
| Escherichia coli | association          | intact | EBI-881132  |
| Escherichia coli | association          | intact | EBI-885288  |
| Escherichia coli | association          | intact | EBI-882671  |
| Escherichia coli | association          | intact | EBI-888507  |
| Escherichia coli | association          | intact | EBI-881230  |
| Escherichia coli | association          | intact | EBI-879914  |
| Escherichia coli | physical association | intact | EBI-888598  |
| Escherichia coli | association          | intact | EBI-879354  |
| Escherichia coli | association          | intact | EBI-880527  |
| Escherichia coli | physical association | intact | EBI-883898  |
| Escherichia coli | association          | intact | EBI-883733  |
| Escherichia coli | association          | intact | EBI-1143257 |
| Escherichia coli | association          | intact | EBI-886205  |
| Escherichia coli | physical association | intact | EBI-885269  |
| Escherichia coli | association          | intact | EBI-890566  |
| Escherichia coli | association          | intact | EBI-889746  |
| Escherichia coli | association          | intact | EBI-887304  |
| Escherichia coli | association          | intact | EBI-880948  |
| Escherichia coli | association          | intact | EBI-888366  |
| Escherichia coli | association          | intact | EBI-878757  |
| Escherichia coli | association          | intact | EBI-881754  |
| Escherichia coli | association          | intact | EBI-886646  |
| Escherichia coli | association          | intact | EBI-882921  |
| Escherichia coli | association          | intact | EBI-882901  |
| Escherichia coli | association          | intact | EBI-889250  |
| Escherichia coli | association          | intact | EBI-893901  |
| Escherichia coli | association          | intact | EBI-883545  |
| Escherichia coli | association          | intact | EBI-880398  |
| Escherichia coli | association          | intact | EBI-881807  |
| Escherichia coli | association          | intact | EBI-887431  |
| Escherichia coli | association          | intact | EBI-1147576 |

|                  |                      |        |             |
|------------------|----------------------|--------|-------------|
| Escherichia coli | association          | intact | EBI-892878  |
| Escherichia coli | association          | intact | EBI-886481  |
| Escherichia coli | association          | intact | EBI-878990  |
| Escherichia coli | association          | intact | EBI-891065  |
| Escherichia coli | association          | intact | EBI-884929  |
| Escherichia coli | physical association | intact | EBI-1137152 |
| Escherichia coli | association          | intact | EBI-888239  |
| Escherichia coli | association          | intact | EBI-880352  |
| Escherichia coli | physical association | intact | EBI-1214191 |
| Escherichia coli | association          | intact | EBI-887087  |
| Escherichia coli | association          | intact | EBI-371377  |
| Escherichia coli | association          | intact | EBI-1136591 |
| Escherichia coli | association          | intact | EBI-2463360 |
| Escherichia coli | physical association | intact | EBI-1144682 |
| Escherichia coli | association          | intact | EBI-880398  |
| Escherichia coli | association          | intact | EBI-885823  |
| Escherichia coli | association          | intact | EBI-880023  |
| Escherichia coli | association          | intact | EBI-888239  |
| Escherichia coli | association          | intact | EBI-885288  |
| Escherichia coli | association          | intact | EBI-371168  |
| Escherichia coli | association          | intact | EBI-880398  |
| Escherichia coli | association          | intact | EBI-1145657 |
| Escherichia coli | physical association | intact | EBI-1146645 |
| Escherichia coli | association          | intact | EBI-369356  |
| Escherichia coli | association          | intact | EBI-1144747 |
| Escherichia coli | association          | intact | EBI-889421  |
| Escherichia coli | association          | intact | EBI-1141661 |
| Escherichia coli | association          | intact | EBI-2463360 |
| Escherichia coli | association          | intact | EBI-1143364 |

|                  |                      |        |             |
|------------------|----------------------|--------|-------------|
| Escherichia coli | association          | intact | EBI-1143271 |
| Escherichia coli | association          | intact | EBI-892863  |
| Escherichia coli | association          | intact | EBI-1135679 |
| Escherichia coli | association          | intact | EBI-1138952 |
| Escherichia coli | physical association | intact | EBI-887753  |
| Escherichia coli | physical association | intact | EBI-893431  |
| Escherichia coli | association          | intact | EBI-889622  |
| Escherichia coli | association          | intact | EBI-890620  |
| Escherichia coli | association          | intact | EBI-885071  |
| Escherichia coli | association          | intact | EBI-882920  |
| Escherichia coli | physical association | intact | EBI-2504703 |
| Escherichia coli | physical association | intact | EBI-2504745 |
| Escherichia coli | physical association | intact | EBI-2504767 |
| Escherichia coli | association          | intact | EBI-1138219 |
| Escherichia coli | association          | intact | EBI-1146958 |
| Escherichia coli | physical association | intact | EBI-1771017 |
| Escherichia coli | association          | intact | EBI-1138207 |
| Escherichia coli | association          | intact | EBI-1135432 |
| Escherichia coli | association          | intact | EBI-1135340 |
| Escherichia coli | association          | intact | EBI-1146615 |
| Escherichia coli | association          | intact | EBI-890853  |
| Escherichia coli | association          | intact | EBI-1139991 |
| Escherichia coli | association          | intact | EBI-885490  |
| Escherichia coli | association          | intact | EBI-882104  |
| Escherichia coli | association          | intact | EBI-894374  |
| Escherichia coli | association          | intact | EBI-888863  |
| Escherichia coli | association          | intact | EBI-894012  |
| Escherichia coli | physical association | intact | EBI-887111  |
| Escherichia coli | association          | intact | EBI-1144430 |
| Escherichia coli | association          | intact | EBI-892741  |
| Escherichia coli | association          | intact | EBI-881002  |

|                  |                      |        |             |
|------------------|----------------------|--------|-------------|
| Escherichia coli | association          | intact | EBI-1146933 |
| Escherichia coli | physical association | intact | EBI-907071  |
| Escherichia coli | association          | intact | EBI-890114  |
| Escherichia coli | association          | intact | EBI-1146046 |
| Escherichia coli | association          | intact | EBI-1143934 |
| Escherichia coli | association          | intact | EBI-1136666 |
| Escherichia coli | association          | intact | EBI-1147944 |
| Escherichia coli | association          | intact | EBI-1135704 |
| Escherichia coli | association          | intact | EBI-1146377 |
| Escherichia coli | association          | intact | EBI-1137295 |
| Escherichia coli | association          | intact | EBI-1142833 |
| Escherichia coli | association          | intact | EBI-1143120 |
| Escherichia coli | physical association | intact | EBI-1144482 |
| Escherichia coli | association          | intact | EBI-1138760 |
| Escherichia coli | association          | intact | EBI-1138751 |
| Escherichia coli | association          | intact | EBI-1140172 |
| Escherichia coli | association          | intact | EBI-1144007 |
| Escherichia coli | physical association | intact | EBI-906820  |
| Escherichia coli | association          | intact | EBI-1137861 |
| Escherichia coli | association          | intact | EBI-1143469 |
| Escherichia coli | association          | intact | EBI-1140965 |
| Escherichia coli | physical association | intact | EBI-1143149 |
| Escherichia coli | association          | intact | EBI-1138515 |
| Escherichia coli | association          | intact | EBI-1144191 |
| Escherichia coli | association          | intact | EBI-1142375 |
| Escherichia coli | association          | intact | EBI-1138694 |
| Escherichia coli | association          | intact | EBI-1144720 |
| Escherichia coli | association          | intact | EBI-1142783 |
| Escherichia coli | association          | intact | EBI-1136564 |
| Escherichia coli | association          | intact | EBI-1142354 |
| Escherichia coli | association          | intact | EBI-1138406 |
| Escherichia coli | association          | intact | EBI-1136261 |
| Escherichia coli | association          | intact | EBI-1139646 |
| Escherichia coli | association          | intact | EBI-1140165 |
| Escherichia coli | association          | intact | EBI-1144639 |
| Escherichia coli | association          | intact | EBI-1145349 |
| Escherichia coli | association          | intact | EBI-1143651 |
| Escherichia coli | association          | intact | EBI-1147361 |
| Escherichia coli | association          | intact | EBI-1138427 |
| Escherichia coli | association          | intact | EBI-1143039 |
| Escherichia coli | association          | intact | EBI-1138059 |
| Escherichia coli | association          | intact | EBI-1138811 |
| Escherichia coli | association          | intact | EBI-1139089 |
| Escherichia coli | association          | intact | EBI-1139338 |



|                  |                      |        |             |
|------------------|----------------------|--------|-------------|
| Escherichia coli | association          | intact | EBI-1139450 |
| Escherichia coli | association          | intact | EBI-1140096 |
| Escherichia coli | association          | intact | EBI-1140602 |
| Escherichia coli | association          | intact | EBI-1140807 |
| Escherichia coli | association          | intact | EBI-1140995 |
| Escherichia coli | association          | intact | EBI-1141261 |
| Escherichia coli | association          | intact | EBI-1142099 |
| Escherichia coli | association          | intact | EBI-1142232 |
| Escherichia coli | association          | intact | EBI-1142499 |
| Escherichia coli | association          | intact | EBI-1142588 |
| Escherichia coli | association          | intact | EBI-1142625 |
| Escherichia coli | association          | intact | EBI-1143500 |
| Escherichia coli | association          | intact | EBI-1144227 |
| Escherichia coli | association          | intact | EBI-1144423 |
| Escherichia coli | association          | intact | EBI-1145294 |
| Escherichia coli | association          | intact | EBI-1146506 |
| Escherichia coli | association          | intact | EBI-1147552 |
| Escherichia coli | association          | intact | EBI-1139043 |
| Escherichia coli | association          | intact | EBI-1144399 |
| Escherichia coli | association          | intact | EBI-1145913 |
| Escherichia coli | association          | intact | EBI-882543  |
| Escherichia coli | physical association | intact | EBI-882193  |
| Escherichia coli | physical association | intact | EBI-906984  |
| Escherichia coli | association          | intact | EBI-879853  |
| Escherichia coli | association          | intact | EBI-884726  |
| Escherichia coli | association          | intact | EBI-1144453 |
| Escherichia coli | association          | intact | EBI-1141384 |
| Escherichia coli | association          | intact | EBI-1145702 |
| Escherichia coli | association          | intact | EBI-1143757 |
| Escherichia coli | association          | intact | EBI-1144887 |
| Escherichia coli | association          | intact | EBI-1139633 |
| Escherichia coli | association          | intact | EBI-1146806 |
| Escherichia coli | association          | intact | EBI-1138845 |
| Escherichia coli | association          | intact | EBI-1135688 |
| Escherichia coli | association          | intact | EBI-1137787 |
| Escherichia coli | association          | intact | EBI-1138038 |
| Escherichia coli | association          | intact | EBI-1138481 |
| Escherichia coli | association          | intact | EBI-1141618 |
| Escherichia coli | association          | intact | EBI-1141862 |
| Escherichia coli | association          | intact | EBI-1146877 |
| Escherichia coli | association          | intact | EBI-1139043 |

|                  |                      |        |             |
|------------------|----------------------|--------|-------------|
| Escherichia coli | physical association | intact | EBI-1147754 |
| Escherichia coli | association          | intact | EBI-1137227 |
| Escherichia coli | association          | intact | EBI-888051  |
| Escherichia coli | association          | intact | EBI-1136570 |
| Escherichia coli | association          | intact | EBI-1135787 |
| Escherichia coli | association          | intact | EBI-1135563 |
| Escherichia coli | association          | intact | EBI-1144258 |
| Escherichia coli | association          | intact | EBI-884695  |
| Escherichia coli | association          | intact | EBI-891531  |
| Escherichia coli | association          | intact | EBI-1143352 |
| Escherichia coli | association          | intact | EBI-887624  |
| Escherichia coli | association          | intact | EBI-1137559 |
| Escherichia coli | association          | intact | EBI-880023  |
| Escherichia coli | association          | intact | EBI-885106  |
| Escherichia coli | association          | intact | EBI-1139279 |
| Escherichia coli | association          | intact | EBI-1140456 |
| Escherichia coli | association          | intact | EBI-1141036 |
| Escherichia coli | association          | intact | EBI-1135498 |
| Escherichia coli | association          | intact | EBI-893272  |
| Escherichia coli | association          | intact | EBI-887434  |
| Escherichia coli | association          | intact | EBI-1138943 |
| Escherichia coli | association          | intact | EBI-1137072 |
| Escherichia coli | association          | intact | EBI-1139617 |
| Escherichia coli | association          | intact | EBI-881374  |
| Escherichia coli | association          | intact | EBI-887918  |
| Escherichia coli | association          | intact | EBI-891549  |
| Escherichia coli | association          | intact | EBI-1140489 |
| Escherichia coli | association          | intact | EBI-890346  |
| Escherichia coli | association          | intact | EBI-895275  |
| Escherichia coli | association          | intact | EBI-1136591 |
| Escherichia coli | association          | intact | EBI-879853  |
| Escherichia coli | association          | intact | EBI-884726  |
| Escherichia coli | association          | intact | EBI-1136487 |
| Escherichia coli | association          | intact | EBI-1137343 |
| Escherichia coli | association          | intact | EBI-1138059 |
| Escherichia coli | association          | intact | EBI-1138952 |
| Escherichia coli | association          | intact | EBI-1140096 |
| Escherichia coli | association          | intact | EBI-1142614 |
| Escherichia coli | association          | intact | EBI-1147040 |
| Escherichia coli | association          | intact | EBI-891042  |
| Escherichia coli | association          | intact | EBI-1147552 |
| Escherichia coli | physical association | intact | EBI-1770986 |
| Escherichia coli | association          | intact | EBI-887624  |
| Escherichia coli | association          | intact | EBI-891089  |

|                  |                      |        |             |
|------------------|----------------------|--------|-------------|
| Escherichia coli | association          | intact | EBI-1140922 |
| Escherichia coli | association          | intact | EBI-890346  |
| Escherichia coli | physical association | intact | EBI-907385  |
| Escherichia coli | association          | intact | EBI-890114  |
| Escherichia coli | association          | intact | EBI-1140079 |
| Escherichia coli | physical association | intact | EBI-906820  |
| Escherichia coli | physical association | intact | EBI-882509  |
| Escherichia coli | association          | intact | EBI-883997  |
| Escherichia coli | association          | intact | EBI-1136117 |
| Escherichia coli | association          | intact | EBI-1142406 |
| Escherichia coli | association          | intact | EBI-1137105 |
| Escherichia coli | association          | intact | EBI-1135798 |
| Escherichia coli | association          | intact | EBI-882273  |
| Escherichia coli | physical association | intact | EBI-887617  |
| Escherichia coli | association          | intact | EBI-1138601 |
| Escherichia coli | association          | intact | EBI-886936  |
| Escherichia coli | association          | intact | EBI-884415  |
| Escherichia coli | association          | intact | EBI-886990  |
| Escherichia coli | association          | intact | EBI-892889  |
| Escherichia coli | association          | intact | EBI-886509  |
| Escherichia coli | association          | intact | EBI-881109  |
| Escherichia coli | association          | intact | EBI-890451  |
| Escherichia coli | association          | intact | EBI-890481  |
| Escherichia coli | association          | intact | EBI-893916  |
| Escherichia coli | association          | intact | EBI-881230  |
| Escherichia coli | association          | intact | EBI-879261  |
| Escherichia coli | association          | intact | EBI-885071  |
| Escherichia coli | association          | intact | EBI-882920  |
| Escherichia coli | association          | intact | EBI-895222  |
| Escherichia coli | association          | intact | EBI-888130  |
| Escherichia coli | association          | intact | EBI-888366  |
| Escherichia coli | association          | intact | EBI-1145305 |

|                  |             |        |             |
|------------------|-------------|--------|-------------|
| Escherichia coli | association | intact | EBI-879643  |
| Escherichia coli | association | intact | EBI-879539  |
| Escherichia coli | association | intact | EBI-879589  |
| Escherichia coli | association | intact | EBI-880413  |
| Escherichia coli | association | intact | EBI-885840  |
| Escherichia coli | association | intact | EBI-880595  |
| Escherichia coli | association | intact | EBI-880023  |
| Escherichia coli | association | intact | EBI-885106  |
| Escherichia coli | association | intact | EBI-888239  |
| Escherichia coli | association | intact | EBI-894085  |
| Escherichia coli | association | intact | EBI-890008  |
| Escherichia coli | association | intact | EBI-879973  |
| Escherichia coli | association | intact | EBI-887767  |
| Escherichia coli | association | intact | EBI-892949  |
| Escherichia coli | association | intact | EBI-886554  |
| Escherichia coli | association | intact | EBI-885288  |
| Escherichia coli | association | intact | EBI-878697  |
| Escherichia coli | association | intact | EBI-888473  |
| Escherichia coli | association | intact | EBI-849240  |
| Escherichia coli | association | intact | EBI-849332  |
| Escherichia coli | association | intact | EBI-849357  |
| Escherichia coli | association | intact | EBI-849407  |
| Escherichia coli | association | intact | EBI-893488  |
| Escherichia coli | association | intact | EBI-849464  |
| Escherichia coli | association | intact | EBI-882523  |
| Escherichia coli | association | intact | EBI-878757  |
| Escherichia coli | association | intact | EBI-881754  |
| Escherichia coli | association | intact | EBI-887152  |
| Escherichia coli | association | intact | EBI-1143201 |
| Escherichia coli | association | intact | EBI-1136986 |
| Escherichia coli | association | intact | EBI-892681  |
| Escherichia coli | association | intact | EBI-1141819 |
| Escherichia coli | association | intact | EBI-1138254 |
| Escherichia coli | association | intact | EBI-1138503 |
| Escherichia coli | association | intact | EBI-1138515 |
| Escherichia coli | association | intact | EBI-1141036 |
| Escherichia coli | association | intact | EBI-1142551 |
| Escherichia coli | association | intact | EBI-1147664 |
| Escherichia coli | association | intact | EBI-879914  |

|                  |                      |        |             |
|------------------|----------------------|--------|-------------|
| Escherichia coli | association          | intact | EBI-886272  |
| Escherichia coli | association          | intact | EBI-1145723 |
| Escherichia coli | physical association | intact | EBI-1135942 |
| Escherichia coli | association          | intact | EBI-1140433 |
| Escherichia coli | physical association | intact | EBI-1142463 |
| Escherichia coli | association          | intact | EBI-1142689 |
| Escherichia coli | association          | intact | EBI-1143531 |
| Escherichia coli | association          | intact | EBI-1135833 |
| Escherichia coli | association          | intact | EBI-1139772 |
| Escherichia coli | association          | intact | EBI-1136591 |
| Escherichia coli | association          | intact | EBI-1137384 |
| Escherichia coli | association          | intact | EBI-1141786 |
| Escherichia coli | association          | intact | EBI-1144358 |
| Escherichia coli | association          | intact | EBI-1147939 |
| Escherichia coli | association          | intact | EBI-883980  |
| Escherichia coli | association          | intact | EBI-1140917 |
| Escherichia coli | association          | intact | EBI-1140556 |
| Escherichia coli | association          | intact | EBI-886059  |
| Escherichia coli | association          | intact | EBI-886705  |
| Escherichia coli | association          | intact | EBI-887500  |
| Escherichia coli | association          | intact | EBI-878697  |
| Escherichia coli | association          | intact | EBI-882671  |
| Escherichia coli | association          | intact | EBI-890236  |
| Escherichia coli | association          | intact | EBI-879914  |
| Escherichia coli | association          | intact | EBI-884810  |
| Escherichia coli | association          | intact | EBI-883997  |
| Escherichia coli | association          | intact | EBI-879354  |
| Escherichia coli | association          | intact | EBI-888130  |
| Escherichia coli | association          | intact | EBI-882273  |
| Escherichia coli | association          | intact | EBI-878757  |
| Escherichia coli | association          | intact | EBI-879208  |
| Escherichia coli | association          | intact | EBI-1141559 |
| Escherichia coli | association          | intact | EBI-879491  |
| Escherichia coli | association          | intact | EBI-1141171 |
| Escherichia coli | association          | intact | EBI-883047  |
| Escherichia coli | association          | intact | EBI-887624  |
| Escherichia coli | association          | intact | EBI-1138911 |

|                  |                      |        |             |
|------------------|----------------------|--------|-------------|
| Escherichia coli | direct interaction   | intact | EBI-902902  |
| Escherichia coli | association          | intact | EBI-1140066 |
| Escherichia coli | association          | intact | EBI-1135853 |
| Escherichia coli | association          | intact | EBI-1135416 |
| Escherichia coli | physical association | intact | EBI-886362  |
| Escherichia coli | association          | intact | EBI-892823  |
| Escherichia coli | association          | intact | EBI-1142937 |
| Escherichia coli | association          | intact | EBI-1137072 |
| Escherichia coli | association          | intact | EBI-1145418 |
| Escherichia coli | association          | intact | EBI-883733  |
| Escherichia coli | association          | intact | EBI-1138059 |
| Escherichia coli | physical association | intact | EBI-886666  |
| Escherichia coli | association          | intact | EBI-1143213 |
| Escherichia coli | association          | intact | EBI-1135996 |
| Escherichia coli | association          | intact | EBI-369356  |
| Escherichia coli | association          | intact | EBI-371168  |
| Escherichia coli | direct interaction   | intact | EBI-903339  |
| Escherichia coli | association          | intact | EBI-885106  |
| Escherichia coli | association          | intact | EBI-895127  |
| Escherichia coli | association          | intact | EBI-2463360 |
| Escherichia coli | association          | intact | EBI-885106  |
| Escherichia coli | association          | intact | EBI-893751  |
| Escherichia coli | association          | intact | EBI-895127  |
| Escherichia coli | physical association | intact | EBI-1147105 |
| Escherichia coli | association          | intact | EBI-879445  |
| Escherichia coli | association          | intact | EBI-879117  |
| Escherichia coli | association          | intact | EBI-1147023 |
| Escherichia coli | association          | intact | EBI-1140761 |
| Escherichia coli | association          | intact | EBI-1142334 |
| Escherichia coli | association          | intact | EBI-891312  |

|                  |                      |        |             |
|------------------|----------------------|--------|-------------|
| Escherichia coli | association          | intact | EBI-1137861 |
| Escherichia coli | association          | intact | EBI-1144509 |
| Escherichia coli | association          | intact | EBI-1145680 |
| Escherichia coli | association          | intact | EBI-1138724 |
| Escherichia coli | association          | intact | EBI-887604  |
| Escherichia coli | association          | intact | EBI-1144639 |
| Escherichia coli | physical association | intact | EBI-1147353 |
| Escherichia coli | association          | intact | EBI-891042  |
| Escherichia coli | association          | intact | EBI-1136976 |
| Escherichia coli | association          | intact | EBI-1141506 |
| Escherichia coli | association          | intact | EBI-1139166 |
| Escherichia coli | association          | intact | EBI-1136063 |
| Escherichia coli | association          | intact | EBI-1142752 |
| Escherichia coli | association          | intact | EBI-1138623 |
| Escherichia coli | association          | intact | EBI-1141091 |
| Escherichia coli | association          | intact | EBI-1143404 |
| Escherichia coli | association          | intact | EBI-883980  |
| Escherichia coli | association          | intact | EBI-1147810 |
| Escherichia coli | association          | intact | EBI-1137072 |
| Escherichia coli | association          | intact | EBI-1142480 |
| Escherichia coli | association          | intact | EBI-1146286 |
| Escherichia coli | association          | intact | EBI-369356  |
| Escherichia coli | association          | intact | EBI-1136591 |
| Escherichia coli | association          | intact | EBI-1139155 |
| Escherichia coli | association          | intact | EBI-1137384 |
| Escherichia coli | association          | intact | EBI-1146690 |
| Escherichia coli | association          | intact | EBI-1138299 |
| Escherichia coli | association          | intact | EBI-1143500 |
| Escherichia coli | association          | intact | EBI-1144822 |
| Escherichia coli | association          | intact | EBI-1139440 |
| Escherichia coli | physical association | intact | EBI-1139447 |
| Escherichia coli | association          | intact | EBI-1139384 |
| Escherichia coli | association          | intact | EBI-1140972 |
| Escherichia coli | association          | intact | EBI-1141819 |
| Escherichia coli | association          | intact | EBI-1144158 |

|                  |                      |        |             |
|------------------|----------------------|--------|-------------|
| Escherichia coli | association          | intact | EBI-1146708 |
| Escherichia coli | association          | intact | EBI-894012  |
| Escherichia coli | association          | intact | EBI-886705  |
| Escherichia coli | association          | intact | EBI-1147147 |
| Escherichia coli | association          | intact | EBI-1136008 |
| Escherichia coli | association          | intact | EBI-879354  |
| Escherichia coli | association          | intact | EBI-883271  |
| Escherichia coli | association          | intact | EBI-1145418 |
| Escherichia coli | association          | intact | EBI-879304  |
| Escherichia coli | association          | intact | EBI-879261  |
| Escherichia coli | association          | intact | EBI-883046  |
| Escherichia coli | association          | intact | EBI-879161  |
| Escherichia coli | association          | intact | EBI-882523  |
| Escherichia coli | association          | intact | EBI-879082  |
| Escherichia coli | association          | intact | EBI-1138593 |
| Escherichia coli | association          | intact | EBI-1146204 |
| Escherichia coli | physical association | intact | EBI-906907  |
| Escherichia coli | association          | intact | EBI-886272  |
| Escherichia coli | association          | intact | EBI-369356  |
| Escherichia coli | association          | intact | EBI-892312  |
| Escherichia coli | physical association | intact | EBI-906838  |
| Escherichia coli | association          | intact | EBI-883980  |
| Escherichia coli | association          | intact | EBI-880564  |
| Escherichia coli | association          | intact | EBI-892010  |
| Escherichia coli | association          | intact | EBI-369356  |
| Escherichia coli | association          | intact | EBI-371168  |
| Escherichia coli | physical association | intact | EBI-907082  |
| Escherichia coli | association          | intact | EBI-884415  |
| Escherichia coli | association          | intact | EBI-883824  |
| Escherichia coli | association          | intact | EBI-1143906 |
| Escherichia coli | association          | intact | EBI-893916  |
| Escherichia coli | association          | intact | EBI-1147338 |
| Escherichia coli | association          | intact | EBI-1146605 |



|                  |             |        |             |
|------------------|-------------|--------|-------------|
| Escherichia coli | association | intact | EBI-1141189 |
| Escherichia coli | association | intact | EBI-884584  |
| Escherichia coli | association | intact | EBI-1140853 |
| Escherichia coli | association | intact | EBI-883621  |
| Escherichia coli | association | intact | EBI-880291  |
| Escherichia coli | association | intact | EBI-1142857 |
| Escherichia coli | association | intact | EBI-889279  |
| Escherichia coli | association | intact | EBI-888671  |
| Escherichia coli | association | intact | EBI-884206  |
| Escherichia coli | association | intact | EBI-880782  |
| Escherichia coli | association | intact | EBI-881611  |
| Escherichia coli | association | intact | EBI-888239  |
| Escherichia coli | association | intact | EBI-880367  |
| Escherichia coli | association | intact | EBI-883913  |
| Escherichia coli | association | intact | EBI-890235  |
| Escherichia coli | association | intact | EBI-885288  |
| Escherichia coli | association | intact | EBI-886413  |
| Escherichia coli | association | intact | EBI-369356  |
| Escherichia coli | association | intact | EBI-371168  |
| Escherichia coli | association | intact | EBI-1140746 |
| Escherichia coli | association | intact | EBI-1140820 |
| Escherichia coli | association | intact | EBI-1138972 |
| Escherichia coli | association | intact | EBI-1136885 |

|                  |             |        |             |
|------------------|-------------|--------|-------------|
| Escherichia coli | association | intact | EBI-890196  |
| Escherichia coli | association | intact | EBI-1138768 |
| Escherichia coli | association | intact | EBI-1144485 |
| Escherichia coli | association | intact | EBI-1139608 |
| Escherichia coli | association | intact | EBI-1140770 |
| Escherichia coli | association | intact | EBI-1140509 |
| Escherichia coli | association | intact | EBI-1145369 |

|                  |                      |        |             |
|------------------|----------------------|--------|-------------|
| Escherichia coli | association          | intact | EBI-1141152 |
| Escherichia coli | association          | intact | EBI-891089  |
| Escherichia coli | association          | intact | EBI-883913  |
| Escherichia coli | association          | intact | EBI-888473  |
| Escherichia coli | physical association | intact | EBI-849220  |
| Escherichia coli | association          | intact | EBI-849381  |
| Escherichia coli | association          | intact | EBI-849407  |
| Escherichia coli | association          | intact | EBI-893488  |
| Escherichia coli | association          | intact | EBI-849044  |
| Escherichia coli | association          | intact | EBI-849432  |
| Escherichia coli | association          | intact | EBI-849464  |
| Escherichia coli | association          | intact | EBI-878757  |
|                  |                      |        |             |
| Escherichia coli | association          | intact | EBI-1136626 |
| Escherichia coli | association          | intact | EBI-883980  |
| Escherichia coli | association          | intact | EBI-1136666 |
| Escherichia coli | association          | intact | EBI-1143120 |
| Escherichia coli | association          | intact | EBI-1136364 |
| Escherichia coli | association          | intact | EBI-1144996 |
| Escherichia coli | association          | intact | EBI-1147698 |
| Escherichia coli | physical association | intact | EBI-1136464 |
| Escherichia coli | association          | intact | EBI-1146962 |
| Escherichia coli | association          | intact | EBI-882671  |
| Escherichia coli | association          | intact | EBI-1146986 |
| Escherichia coli | association          | intact | EBI-1147361 |
|                  |                      |        |             |
| Escherichia coli | association          | intact | EBI-1147386 |
| Escherichia coli | association          | intact | EBI-1146605 |
| Escherichia coli | association          | intact | EBI-885677  |
| Escherichia coli | association          | intact | EBI-884758  |
| Escherichia coli | association          | intact | EBI-891593  |
| Escherichia coli | association          | intact | EBI-884584  |
| Escherichia coli | association          | intact | EBI-1136626 |
| Escherichia coli | association          | intact | EBI-1136646 |
| Escherichia coli | association          | intact | EBI-879643  |
| Escherichia coli | association          | intact | EBI-883980  |
| Escherichia coli | association          | intact | EBI-879539  |
| Escherichia coli | association          | intact | EBI-879589  |
| Escherichia coli | association          | intact | EBI-883621  |
| Escherichia coli | association          | intact | EBI-880291  |
| Escherichia coli | association          | intact | EBI-887392  |
| Escherichia coli | association          | intact | EBI-1140172 |
| Escherichia coli | association          | intact | EBI-1146778 |

|                  |             |        |             |
|------------------|-------------|--------|-------------|
| Escherichia coli | association | intact | EBI-888109  |
| Escherichia coli | association | intact | EBI-1146237 |
| Escherichia coli | association | intact | EBI-883047  |
| Escherichia coli | association | intact | EBI-1143469 |
| Escherichia coli | association | intact | EBI-884206  |
| Escherichia coli | association | intact | EBI-892795  |
| Escherichia coli | association | intact | EBI-880595  |
| Escherichia coli | association | intact | EBI-886556  |
| Escherichia coli | association | intact | EBI-1145795 |
| Escherichia coli | association | intact | EBI-887853  |
| Escherichia coli | association | intact | EBI-886059  |
| Escherichia coli | association | intact | EBI-879887  |
| Escherichia coli | association | intact | EBI-888239  |
| Escherichia coli | association | intact | EBI-1137155 |
| Escherichia coli | association | intact | EBI-893067  |
| Escherichia coli | association | intact | EBI-886705  |
| Escherichia coli | association | intact | EBI-1147147 |
| Escherichia coli | association | intact | EBI-1141241 |
| Escherichia coli | association | intact | EBI-1142551 |
| Escherichia coli | association | intact | EBI-884968  |
| Escherichia coli | association | intact | EBI-1144696 |
| Escherichia coli | association | intact | EBI-885898  |
| Escherichia coli | association | intact | EBI-890235  |
| Escherichia coli | association | intact | EBI-1146817 |
| Escherichia coli | association | intact | EBI-881374  |
| Escherichia coli | association | intact | EBI-879914  |
| Escherichia coli | association | intact | EBI-1135887 |
| Escherichia coli | association | intact | EBI-879354  |
| Escherichia coli | association | intact | EBI-879304  |
| Escherichia coli | association | intact | EBI-892741  |
| Escherichia coli | association | intact | EBI-1144702 |
| Escherichia coli | association | intact | EBI-887115  |
| Escherichia coli | association | intact | EBI-880477  |
| Escherichia coli | association | intact | EBI-890918  |
| Escherichia coli | association | intact | EBI-884360  |
| Escherichia coli | association | intact | EBI-2463360 |
| Escherichia coli | association | intact | EBI-1145987 |
| Escherichia coli | association | intact | EBI-1144266 |
| Escherichia coli | association | intact | EBI-1146156 |
| Escherichia coli | association | intact | EBI-1139089 |
| Escherichia coli | association | intact | EBI-1139450 |
| Escherichia coli | association | intact | EBI-886031  |
| Escherichia coli | association | intact | EBI-1142232 |
| Escherichia coli | association | intact | EBI-1142177 |

|                  |                      |        |             |
|------------------|----------------------|--------|-------------|
| Escherichia coli | association          | intact | EBI-894104  |
| Escherichia coli | association          | intact | EBI-1146450 |
| Escherichia coli | association          | intact | EBI-1136944 |
| Escherichia coli | association          | intact | EBI-1136170 |
| Escherichia coli | association          | intact | EBI-1136177 |
| Escherichia coli | physical association | intact | EBI-1142507 |
| Escherichia coli | association          | intact | EBI-1142422 |
| Escherichia coli | association          | intact | EBI-1143689 |
| Escherichia coli | association          | intact | EBI-1142059 |
| Escherichia coli | association          | intact | EBI-1145487 |
| Escherichia coli | association          | intact | EBI-1139424 |
| Escherichia coli | association          | intact | EBI-1136049 |
| Escherichia coli | association          | intact | EBI-1139419 |
| Escherichia coli | association          | intact | EBI-1141314 |
| Escherichia coli | association          | intact | EBI-1142963 |
| Escherichia coli | association          | intact | EBI-1143243 |
| Escherichia coli | association          | intact | EBI-1140972 |

|                  |                      |        |             |
|------------------|----------------------|--------|-------------|
| Escherichia coli | association          | intact | EBI-888995  |
| Escherichia coli | association          | intact | EBI-889682  |
| Escherichia coli | physical association | intact | EBI-1212150 |
| Escherichia coli | association          | intact | EBI-885677  |
| Escherichia coli | association          | intact | EBI-891481  |
| Escherichia coli | physical association | intact | EBI-882623  |
| Escherichia coli | association          | intact | EBI-879694  |
| Escherichia coli | association          | intact | EBI-1146120 |
| Escherichia coli | association          | intact | EBI-1140146 |
| Escherichia coli | association          | intact | EBI-879643  |
| Escherichia coli | association          | intact | EBI-883980  |
| Escherichia coli | association          | intact | EBI-1140933 |
| Escherichia coli | association          | intact | EBI-879539  |
| Escherichia coli | association          | intact | EBI-879589  |
| Escherichia coli | association          | intact | EBI-883848  |
| Escherichia coli | association          | intact | EBI-1137461 |
| Escherichia coli | physical association | intact | EBI-879532  |
| Escherichia coli | association          | intact | EBI-1138538 |

|                  |                      |        |             |
|------------------|----------------------|--------|-------------|
| Escherichia coli | association          | intact | EBI-1140130 |
| Escherichia coli | association          | intact | EBI-1136666 |
| Escherichia coli | association          | intact | EBI-894157  |
| Escherichia coli | association          | intact | EBI-880564  |
| Escherichia coli | association          | intact | EBI-880545  |
| Escherichia coli | association          | intact | EBI-888958  |
| Escherichia coli | association          | intact | EBI-881486  |
| Escherichia coli | association          | intact | EBI-1145744 |
| Escherichia coli | association          | intact | EBI-885640  |
| Escherichia coli | association          | intact | EBI-1147342 |
| Escherichia coli | association          | intact | EBI-883621  |
| Escherichia coli | association          | intact | EBI-1146094 |
| Escherichia coli | association          | intact | EBI-887293  |
| Escherichia coli | association          | intact | EBI-887148  |
| Escherichia coli | association          | intact | EBI-1145369 |
| Escherichia coli | association          | intact | EBI-1146586 |
| Escherichia coli | association          | intact | EBI-1143235 |
| Escherichia coli | association          | intact | EBI-1136808 |
| Escherichia coli | association          | intact | EBI-880595  |
| Escherichia coli | association          | intact | EBI-880223  |
| Escherichia coli | association          | intact | EBI-885437  |
| Escherichia coli | association          | intact | EBI-880105  |
| Escherichia coli | association          | intact | EBI-894305  |
| Escherichia coli | association          | intact | EBI-1145795 |
| Escherichia coli | association          | intact | EBI-892341  |
| Escherichia coli | association          | intact | EBI-879466  |
| Escherichia coli | association          | intact | EBI-883484  |
| Escherichia coli | association          | intact | EBI-881294  |
| Escherichia coli | association          | intact | EBI-883387  |
| Escherichia coli | association          | intact | EBI-1135798 |
| Escherichia coli | association          | intact | EBI-1136749 |
| Escherichia coli | physical association | intact | EBI-882449  |
| Escherichia coli | association          | intact | EBI-886823  |
| Escherichia coli | association          | intact | EBI-1144556 |
| Escherichia coli | association          | intact | EBI-893285  |
| Escherichia coli | association          | intact | EBI-887500  |
| Escherichia coli | association          | intact | EBI-879973  |
| Escherichia coli | association          | intact | EBI-891089  |
| Escherichia coli | association          | intact | EBI-1147664 |
| Escherichia coli | association          | intact | EBI-1136768 |
| Escherichia coli | physical association | intact | EBI-885817  |
| Escherichia coli | association          | intact | EBI-1143395 |
| Escherichia coli | association          | intact | EBI-895127  |
| Escherichia coli | association          | intact | EBI-1146417 |
| Escherichia coli | association          | intact | EBI-1146274 |

|                  |                      |        |             |
|------------------|----------------------|--------|-------------|
| Escherichia coli | association          | intact | EBI-892949  |
| Escherichia coli | association          | intact | EBI-1138014 |
| Escherichia coli | association          | intact | EBI-881132  |
| Escherichia coli | association          | intact | EBI-886140  |
| Escherichia coli | association          | intact | EBI-1138445 |
| Escherichia coli | association          | intact | EBI-885288  |
| Escherichia coli | association          | intact | EBI-892010  |
| Escherichia coli | association          | intact | EBI-1143090 |
| Escherichia coli | association          | intact | EBI-889536  |
| Escherichia coli | association          | intact | EBI-878697  |
| Escherichia coli | association          | intact | EBI-882671  |
| Escherichia coli | association          | intact | EBI-890236  |
| Escherichia coli | association          | intact | EBI-1138798 |
| Escherichia coli | association          | intact | EBI-1147310 |
| Escherichia coli | association          | intact | EBI-888473  |
| Escherichia coli | association          | intact | EBI-849332  |
| Escherichia coli | association          | intact | EBI-849357  |
| Escherichia coli | association          | intact | EBI-849357  |
| Escherichia coli | association          | intact | EBI-849432  |
| Escherichia coli | association          | intact | EBI-849464  |
| Escherichia coli | association          | intact | EBI-879914  |
| Escherichia coli | association          | intact | EBI-884810  |
| Escherichia coli | association          | intact | EBI-891136  |
| Escherichia coli | association          | intact | EBI-883997  |
| Escherichia coli | association          | intact | EBI-879354  |
| Escherichia coli | association          | intact | EBI-886257  |
| Escherichia coli | association          | intact | EBI-892741  |
| Escherichia coli | association          | intact | EBI-879117  |
| Escherichia coli | association          | intact | EBI-892437  |
| Escherichia coli | association          | intact | EBI-885881  |
| Escherichia coli | association          | intact | EBI-1138195 |
| Escherichia coli | association          | intact | EBI-1138623 |
| Escherichia coli | association          | intact | EBI-890918  |
| Escherichia coli | association          | intact | EBI-887918  |
| Escherichia coli | association          | intact | EBI-889906  |
| Escherichia coli | association          | intact | EBI-1143521 |
| Escherichia coli | association          | intact | EBI-889106  |
| Escherichia coli | association          | intact | EBI-884548  |
| Escherichia coli | physical association | intact | EBI-879795  |
| Escherichia coli | association          | intact | EBI-886205  |
| Escherichia coli | association          | intact | EBI-1136559 |
| Escherichia coli | association          | intact | EBI-2463360 |
| Escherichia coli | association          | intact | EBI-1135871 |
| Escherichia coli | association          | intact | EBI-1146227 |
| Escherichia coli | association          | intact | EBI-889746  |

|                  |             |        |             |
|------------------|-------------|--------|-------------|
| Escherichia coli | association | intact | EBI-887152  |
| Escherichia coli | association | intact | EBI-880917  |
| Escherichia coli | association | intact | EBI-1141740 |
| Escherichia coli | association | intact | EBI-1135902 |
| Escherichia coli | association | intact | EBI-1136194 |
| Escherichia coli | association | intact | EBI-1136842 |
| Escherichia coli | association | intact | EBI-892264  |
| Escherichia coli | association | intact | EBI-878757  |
| Escherichia coli | association | intact | EBI-881754  |
| Escherichia coli | association | intact | EBI-1138038 |
| Escherichia coli | association | intact | EBI-882921  |
| Escherichia coli | association | intact | EBI-879208  |
| Escherichia coli | association | intact | EBI-1138481 |
| Escherichia coli | association | intact | EBI-1139235 |
| Escherichia coli | association | intact | EBI-1139450 |
| Escherichia coli | association | intact | EBI-880468  |
| Escherichia coli | association | intact | EBI-886031  |
| Escherichia coli | association | intact | EBI-1140414 |
| Escherichia coli | association | intact | EBI-1140539 |
| Escherichia coli | association | intact | EBI-1140820 |
| Escherichia coli | association | intact | EBI-1140837 |
| Escherichia coli | association | intact | EBI-879491  |
| Escherichia coli | association | intact | EBI-891424  |
| Escherichia coli | association | intact | EBI-1143609 |
| Escherichia coli | association | intact | EBI-1144937 |
| Escherichia coli | association | intact | EBI-887431  |
| Escherichia coli | association | intact | EBI-1139043 |
| Escherichia coli | association | intact | EBI-1140044 |
| Escherichia coli | association | intact | EBI-1136427 |
| Escherichia coli | association | intact | EBI-1135667 |
| Escherichia coli | association | intact | EBI-884758  |
| Escherichia coli | association | intact | EBI-884584  |
| Escherichia coli | association | intact | EBI-1138046 |
| Escherichia coli | association | intact | EBI-883621  |
| Escherichia coli | association | intact | EBI-883577  |
| Escherichia coli | association | intact | EBI-887392  |
| Escherichia coli | association | intact | EBI-887148  |
| Escherichia coli | association | intact | EBI-1135416 |
| Escherichia coli | association | intact | EBI-883047  |
| Escherichia coli | association | intact | EBI-1143469 |
| Escherichia coli | association | intact | EBI-884130  |
| Escherichia coli | association | intact | EBI-885437  |
| Escherichia coli | association | intact | EBI-882104  |
| Escherichia coli | association | intact | EBI-878924  |

|                  |                      |        |             |
|------------------|----------------------|--------|-------------|
| Escherichia coli | association          | intact | EBI-894305  |
| Escherichia coli | association          | intact | EBI-880828  |
| Escherichia coli | association          | intact | EBI-1137559 |
| Escherichia coli | association          | intact | EBI-880782  |
| Escherichia coli | association          | intact | EBI-880750  |
| Escherichia coli | association          | intact | EBI-1147698 |
| Escherichia coli | association          | intact | EBI-1135819 |
| Escherichia coli | association          | intact | EBI-1135833 |
| Escherichia coli | association          | intact | EBI-1142947 |
| Escherichia coli | association          | intact | EBI-1145830 |
| Escherichia coli | association          | intact | EBI-887500  |
| Escherichia coli | association          | intact | EBI-881046  |
| Escherichia coli | association          | intact | EBI-1143694 |
| Escherichia coli | association          | intact | EBI-1146962 |
| Escherichia coli | association          | intact | EBI-881132  |
| Escherichia coli | association          | intact | EBI-1145040 |
| Escherichia coli | physical association | intact | EBI-885017  |
| Escherichia coli | association          | intact | EBI-885881  |
| Escherichia coli | association          | intact | EBI-1145192 |
| Escherichia coli | association          | intact | EBI-1136388 |
| Escherichia coli | association          | intact | EBI-2463360 |
| Escherichia coli | association          | intact | EBI-1135871 |
| Escherichia coli | association          | intact | EBI-882273  |
| Escherichia coli | association          | intact | EBI-1144986 |
| Escherichia coli | association          | intact | EBI-892264  |
| Escherichia coli | association          | intact | EBI-1137127 |
| Escherichia coli | association          | intact | EBI-882921  |
| Escherichia coli | association          | intact | EBI-1141630 |
| Escherichia coli | association          | intact | EBI-1143243 |
| Escherichia coli | association          | intact | EBI-1146826 |
| Escherichia coli | association          | intact | EBI-1140627 |
|                  |                      |        |             |
| Escherichia coli | association          | intact | EBI-891481  |
| Escherichia coli | association          | intact | EBI-881486  |
| Escherichia coli | association          | intact | EBI-888109  |
| Escherichia coli | association          | intact | EBI-888030  |
| Escherichia coli | association          | intact | EBI-893878  |
| Escherichia coli | association          | intact | EBI-894305  |
| Escherichia coli | association          | intact | EBI-889772  |
| Escherichia coli | association          | intact | EBI-888863  |
| Escherichia coli | association          | intact | EBI-892599  |
| Escherichia coli | association          | intact | EBI-894012  |
| Escherichia coli | association          | intact | EBI-881701  |
| Escherichia coli | association          | intact | EBI-893999  |
| Escherichia coli | association          | intact | EBI-891798  |



|                  |                      |        |             |
|------------------|----------------------|--------|-------------|
| Escherichia coli | association          | intact | EBI-884491  |
| Escherichia coli | physical association | intact | EBI-881872  |
| Escherichia coli | association          | intact | EBI-890083  |
| Escherichia coli | association          | intact | EBI-1145321 |
| Escherichia coli | association          | intact | EBI-881343  |
| Escherichia coli | association          | intact | EBI-895127  |
| Escherichia coli | association          | intact | EBI-886554  |
| Escherichia coli | association          | intact | EBI-894458  |
| Escherichia coli | association          | intact | EBI-888473  |
| Escherichia coli | association          | intact | EBI-893488  |
| Escherichia coli | association          | intact | EBI-884810  |
| Escherichia coli | association          | intact | EBI-883170  |
| Escherichia coli | association          | intact | EBI-886105  |
| Escherichia coli | association          | intact | EBI-891845  |
| Escherichia coli | association          | intact | EBI-881754  |
| Escherichia coli | association          | intact | EBI-1140414 |
| Escherichia coli | association          | intact | EBI-881886  |
|                  |                      |        |             |
| Escherichia coli | association          | intact | EBI-888995  |
| Escherichia coli | association          | intact | EBI-886162  |
| Escherichia coli | association          | intact | EBI-891593  |
| Escherichia coli | association          | intact | EBI-891673  |
| Escherichia coli | association          | intact | EBI-884584  |
| Escherichia coli | association          | intact | EBI-879643  |
| Escherichia coli | association          | intact | EBI-883980  |
| Escherichia coli | association          | intact | EBI-883767  |
| Escherichia coli | association          | intact | EBI-883726  |
| Escherichia coli | association          | intact | EBI-894157  |
| Escherichia coli | association          | intact | EBI-888958  |
| Escherichia coli | association          | intact | EBI-881486  |
| Escherichia coli | association          | intact | EBI-894927  |
| Escherichia coli | association          | intact | EBI-891656  |
| Escherichia coli | association          | intact | EBI-887148  |
| Escherichia coli | association          | intact | EBI-891005  |
| Escherichia coli | association          | intact | EBI-887368  |
| Escherichia coli | association          | intact | EBI-885867  |
| Escherichia coli | association          | intact | EBI-893878  |
| Escherichia coli | association          | intact | EBI-883047  |
| Escherichia coli | association          | intact | EBI-886556  |
| Escherichia coli | association          | intact | EBI-880133  |
| Escherichia coli | association          | intact | EBI-888700  |
| Escherichia coli | association          | intact | EBI-886932  |
| Escherichia coli | association          | intact | EBI-892341  |
| Escherichia coli | association          | intact | EBI-883484  |
| Escherichia coli | association          | intact | EBI-886364  |

|                  |             |        |            |
|------------------|-------------|--------|------------|
| Escherichia coli | association | intact | EBI-894403 |
| Escherichia coli | association | intact | EBI-889772 |
| Escherichia coli | association | intact | EBI-888757 |
| Escherichia coli | association | intact | EBI-883387 |
| Escherichia coli | association | intact | EBI-893163 |
| Escherichia coli | association | intact | EBI-888472 |
| Escherichia coli | association | intact | EBI-889577 |
| Escherichia coli | association | intact | EBI-894571 |
| Escherichia coli | association | intact | EBI-892532 |
| Escherichia coli | association | intact | EBI-892581 |
| Escherichia coli | association | intact | EBI-892599 |
| Escherichia coli | association | intact | EBI-894976 |
| Escherichia coli | association | intact | EBI-889622 |
| Escherichia coli | association | intact | EBI-894594 |
| Escherichia coli | association | intact | EBI-894012 |
| Escherichia coli | association | intact | EBI-881701 |
| Escherichia coli | association | intact | EBI-886789 |
| Escherichia coli | association | intact | EBI-881427 |
| Escherichia coli | association | intact | EBI-890645 |
| Escherichia coli | association | intact | EBI-893285 |
| Escherichia coli | association | intact | EBI-887500 |
| Escherichia coli | association | intact | EBI-884958 |
| Escherichia coli | association | intact | EBI-891798 |
| Escherichia coli | association | intact | EBI-891089 |
| Escherichia coli | association | intact | EBI-883913 |
| Escherichia coli | association | intact | EBI-884491 |
| Escherichia coli | association | intact | EBI-881343 |
| Escherichia coli | association | intact | EBI-895127 |
| Escherichia coli | association | intact | EBI-882652 |
| Escherichia coli | association | intact | EBI-882754 |
| Escherichia coli | association | intact | EBI-879136 |
| Escherichia coli | association | intact | EBI-892949 |
| Escherichia coli | association | intact | EBI-894195 |
| Escherichia coli | association | intact | EBI-894497 |
| Escherichia coli | association | intact | EBI-885288 |
| Escherichia coli | association | intact | EBI-892010 |
| Escherichia coli | association | intact | EBI-889536 |
| Escherichia coli | association | intact | EBI-878697 |
| Escherichia coli | association | intact | EBI-882671 |
| Escherichia coli | association | intact | EBI-890236 |
| Escherichia coli | association | intact | EBI-893488 |
| Escherichia coli | association | intact | EBI-884810 |
| Escherichia coli | association | intact | EBI-891136 |
| Escherichia coli | association | intact | EBI-883997 |
| Escherichia coli | association | intact | EBI-879354 |

|                  |             |        |             |
|------------------|-------------|--------|-------------|
| Escherichia coli | association | intact | EBI-883271  |
| Escherichia coli | association | intact | EBI-879261  |
| Escherichia coli | association | intact | EBI-892437  |
| Escherichia coli | association | intact | EBI-885881  |
| Escherichia coli | association | intact | EBI-886442  |
| Escherichia coli | association | intact | EBI-886310  |
| Escherichia coli | association | intact | EBI-890918  |
| Escherichia coli | association | intact | EBI-881988  |
| Escherichia coli | association | intact | EBI-886668  |
| Escherichia coli | association | intact | EBI-887918  |
| Escherichia coli | association | intact | EBI-890426  |
| Escherichia coli | association | intact | EBI-889827  |
| Escherichia coli | association | intact | EBI-884548  |
| Escherichia coli | association | intact | EBI-891201  |
| Escherichia coli | association | intact | EBI-892692  |
| Escherichia coli | association | intact | EBI-2463360 |
| Escherichia coli | association | intact | EBI-882273  |
| Escherichia coli | association | intact | EBI-894652  |
| Escherichia coli | association | intact | EBI-887152  |
| Escherichia coli | association | intact | EBI-888366  |
| Escherichia coli | association | intact | EBI-882523  |
| Escherichia coli | association | intact | EBI-879082  |
| Escherichia coli | association | intact | EBI-881754  |
| Escherichia coli | association | intact | EBI-892986  |
| Escherichia coli | association | intact | EBI-882921  |
| Escherichia coli | association | intact | EBI-879208  |
| Escherichia coli | association | intact | EBI-891722  |
| Escherichia coli | association | intact | EBI-881886  |
| Escherichia coli | association | intact | EBI-887431  |
| Escherichia coli | association | intact | EBI-891065  |
| Escherichia coli | association | intact | EBI-1136440 |
| Escherichia coli | association | intact | EBI-1141189 |
| Escherichia coli | association | intact | EBI-878632  |
| Escherichia coli | association | intact | EBI-890702  |
| Escherichia coli | association | intact | EBI-1146884 |
| Escherichia coli | association | intact | EBI-894927  |
| Escherichia coli | association | intact | EBI-1137295 |
| Escherichia coli | association | intact | EBI-1146889 |
| Escherichia coli | association | intact | EBI-1135340 |
| Escherichia coli | association | intact | EBI-1141372 |
| Escherichia coli | association | intact | EBI-1135563 |
| Escherichia coli | association | intact | EBI-1145878 |
| Escherichia coli | association | intact | EBI-1143469 |
| Escherichia coli | association | intact | EBI-1147620 |

|                  |                      |        |             |
|------------------|----------------------|--------|-------------|
| Escherichia coli | association          | intact | EBI-1139271 |
| Escherichia coli | association          | intact | EBI-1136343 |
| Escherichia coli | association          | intact | EBI-1143130 |
| Escherichia coli | association          | intact | EBI-888700  |
| Escherichia coli | association          | intact | EBI-1140585 |
| Escherichia coli | association          | intact | EBI-894403  |
| Escherichia coli | association          | intact | EBI-888757  |
| Escherichia coli | association          | intact | EBI-892532  |
| Escherichia coli | association          | intact | EBI-1145830 |
| Escherichia coli | association          | intact | EBI-1141105 |
| Escherichia coli | association          | intact | EBI-1137072 |
| Escherichia coli | association          | intact | EBI-890236  |
| Escherichia coli | association          | intact | EBI-884810  |
| Escherichia coli | association          | intact | EBI-883997  |
| Escherichia coli | association          | intact | EBI-885881  |
| Escherichia coli | association          | intact | EBI-1145639 |
| Escherichia coli | association          | intact | EBI-1135645 |
| Escherichia coli | association          | intact | EBI-1136591 |
| Escherichia coli | association          | intact | EBI-2463360 |
| Escherichia coli | association          | intact | EBI-894652  |
| Escherichia coli | association          | intact | EBI-887152  |
| Escherichia coli | association          | intact | EBI-1141802 |
| Escherichia coli | association          | intact | EBI-882523  |
| Escherichia coli | association          | intact | EBI-1135630 |
| Escherichia coli | association          | intact | EBI-887712  |
| Escherichia coli | association          | intact | EBI-1140414 |
| Escherichia coli | association          | intact | EBI-1140602 |
| Escherichia coli | association          | intact | EBI-1140746 |
| Escherichia coli | physical association | intact | EBI-1141419 |
| Escherichia coli | association          | intact | EBI-1142588 |
| Escherichia coli | association          | intact | EBI-1147604 |
| Escherichia coli | association          | intact | EBI-1140972 |
| Escherichia coli | association          | intact | EBI-882138  |
| Escherichia coli | association          | intact | EBI-880730  |
| Escherichia coli | association          | intact | EBI-1142209 |
| Escherichia coli | association          | intact | EBI-1146553 |
| Escherichia coli | association          | intact | EBI-1146120 |
| Escherichia coli | association          | intact | EBI-1137461 |
| Escherichia coli | association          | intact | EBI-1145762 |
| Escherichia coli | association          | intact | EBI-1147250 |
| Escherichia coli | association          | intact | EBI-1138046 |
| Escherichia coli | association          | intact | EBI-890702  |
| Escherichia coli | association          | intact | EBI-890751  |
| Escherichia coli | association          | intact | EBI-1142650 |

|                  |             |        |             |
|------------------|-------------|--------|-------------|
| Escherichia coli | association | intact | EBI-1142893 |
| Escherichia coli | association | intact | EBI-1135340 |
| Escherichia coli | association | intact | EBI-1146586 |
| Escherichia coli | association | intact | EBI-1143469 |
| Escherichia coli | association | intact | EBI-886556  |
| Escherichia coli | association | intact | EBI-884306  |
| Escherichia coli | association | intact | EBI-883484  |
| Escherichia coli | association | intact | EBI-1135819 |
| Escherichia coli | association | intact | EBI-892599  |
| Escherichia coli | association | intact | EBI-886059  |
| Escherichia coli | association | intact | EBI-886823  |
| Escherichia coli | association | intact | EBI-1145014 |
| Escherichia coli | association | intact | EBI-1145063 |
| Escherichia coli | association | intact | EBI-881427  |
| Escherichia coli | association | intact | EBI-1138943 |
| Escherichia coli | association | intact | EBI-893285  |
| Escherichia coli | association | intact | EBI-891798  |
| Escherichia coli | association | intact | EBI-891089  |
| Escherichia coli | association | intact | EBI-1147590 |
| Escherichia coli | association | intact | EBI-1143287 |
| Escherichia coli | association | intact | EBI-1142317 |
| Escherichia coli | association | intact | EBI-885288  |
| Escherichia coli | association | intact | EBI-892010  |
| Escherichia coli | association | intact | EBI-882671  |
| Escherichia coli | association | intact | EBI-890236  |
| Escherichia coli | association | intact | EBI-849432  |
| Escherichia coli | association | intact | EBI-849464  |
| Escherichia coli | association | intact | EBI-884810  |
| Escherichia coli | association | intact | EBI-891136  |
| Escherichia coli | association | intact | EBI-883997  |
| Escherichia coli | association | intact | EBI-879354  |
| Escherichia coli | association | intact | EBI-1145418 |
| Escherichia coli | association | intact | EBI-879261  |
| Escherichia coli | association | intact | EBI-886257  |
| Escherichia coli | association | intact | EBI-892437  |
| Escherichia coli | association | intact | EBI-885881  |
| Escherichia coli | association | intact | EBI-890918  |
| Escherichia coli | association | intact | EBI-881988  |
| Escherichia coli | association | intact | EBI-1145639 |
| Escherichia coli | association | intact | EBI-886668  |
| Escherichia coli | association | intact | EBI-887918  |
| Escherichia coli | association | intact | EBI-2463360 |
| Escherichia coli | association | intact | EBI-1135871 |
| Escherichia coli | association | intact | EBI-1144986 |
| Escherichia coli | association | intact | EBI-1139703 |

|                  |             |        |             |
|------------------|-------------|--------|-------------|
| Escherichia coli | association | intact | EBI-882523  |
| Escherichia coli | association | intact | EBI-879082  |
| Escherichia coli | association | intact | EBI-882921  |
| Escherichia coli | association | intact | EBI-1140446 |
| Escherichia coli | association | intact | EBI-1141281 |
| Escherichia coli | association | intact | EBI-1141862 |
| Escherichia coli | association | intact | EBI-1142510 |
| Escherichia coli | association | intact | EBI-1142716 |
| Escherichia coli | association | intact | EBI-891722  |
| Escherichia coli | association | intact | EBI-1144619 |
| Escherichia coli | association | intact | EBI-1145047 |
| Escherichia coli | association | intact | EBI-1145259 |
| Escherichia coli | association | intact | EBI-1146826 |
| Escherichia coli | association | intact | EBI-1147242 |
| Escherichia coli | association | intact | EBI-1144399 |

|                  |             |        |             |
|------------------|-------------|--------|-------------|
| Escherichia coli | association | intact | EBI-881486  |
| Escherichia coli | association | intact | EBI-890702  |
| Escherichia coli | association | intact | EBI-888030  |
| Escherichia coli | association | intact | EBI-1146848 |
| Escherichia coli | association | intact | EBI-885490  |
| Escherichia coli | association | intact | EBI-886932  |
| Escherichia coli | association | intact | EBI-883484  |
| Escherichia coli | association | intact | EBI-1146400 |
| Escherichia coli | association | intact | EBI-892599  |
| Escherichia coli | association | intact | EBI-1141533 |
| Escherichia coli | association | intact | EBI-1145014 |
| Escherichia coli | association | intact | EBI-893285  |
| Escherichia coli | association | intact | EBI-882652  |
| Escherichia coli | association | intact | EBI-890236  |
| Escherichia coli | association | intact | EBI-884810  |
| Escherichia coli | association | intact | EBI-891136  |
| Escherichia coli | association | intact | EBI-883271  |
| Escherichia coli | association | intact | EBI-883046  |
| Escherichia coli | association | intact | EBI-892437  |
| Escherichia coli | association | intact | EBI-889827  |
| Escherichia coli | association | intact | EBI-2463360 |
| Escherichia coli | association | intact | EBI-882523  |
| Escherichia coli | association | intact | EBI-1137618 |
| Escherichia coli | association | intact | EBI-1138952 |
| Escherichia coli | association | intact | EBI-1142614 |
| Escherichia coli | association | intact | EBI-891424  |
| Escherichia coli | association | intact | EBI-891722  |
| Escherichia coli | association | intact | EBI-1144619 |

|                  |             |        |             |
|------------------|-------------|--------|-------------|
| Escherichia coli | association | intact | EBI-1142184 |
| Escherichia coli | association | intact | EBI-1146553 |
| Escherichia coli | association | intact | EBI-1144661 |
| Escherichia coli | association | intact | EBI-1140667 |
| Escherichia coli | association | intact | EBI-1138254 |
| Escherichia coli | association | intact | EBI-1146120 |
| Escherichia coli | association | intact | EBI-1140130 |
| Escherichia coli | association | intact | EBI-1136666 |
| Escherichia coli | association | intact | EBI-881486  |
| Escherichia coli | association | intact | EBI-1145744 |
| Escherichia coli | association | intact | EBI-1143298 |
| Escherichia coli | association | intact | EBI-1146889 |
| Escherichia coli | association | intact | EBI-1147856 |
| Escherichia coli | association | intact | EBI-1135340 |
| Escherichia coli | association | intact | EBI-1145369 |
| Escherichia coli | association | intact | EBI-1147095 |
| Escherichia coli | association | intact | EBI-1144485 |
| Escherichia coli | association | intact | EBI-1146586 |
| Escherichia coli | association | intact | EBI-1146848 |
| Escherichia coli | association | intact | EBI-1145815 |
| Escherichia coli | association | intact | EBI-1143469 |
| Escherichia coli | association | intact | EBI-1143130 |
| Escherichia coli | association | intact | EBI-1137559 |
| Escherichia coli | association | intact | EBI-1147088 |
| Escherichia coli | association | intact | EBI-1143736 |
| Escherichia coli | association | intact | EBI-1136963 |
| Escherichia coli | association | intact | EBI-1137105 |
| Escherichia coli | association | intact | EBI-1143113 |
| Escherichia coli | association | intact | EBI-1135819 |
| Escherichia coli | association | intact | EBI-1137052 |
| Escherichia coli | association | intact | EBI-1137964 |
| Escherichia coli | association | intact | EBI-1138694 |
| Escherichia coli | association | intact | EBI-1141533 |
| Escherichia coli | association | intact | EBI-1144720 |
| Escherichia coli | association | intact | EBI-1138378 |
| Escherichia coli | association | intact | EBI-1135548 |
| Escherichia coli | association | intact | EBI-1144107 |
| Escherichia coli | association | intact | EBI-1144471 |
| Escherichia coli | association | intact | EBI-1142947 |
| Escherichia coli | association | intact | EBI-1138921 |
| Escherichia coli | association | intact | EBI-1145063 |
| Escherichia coli | association | intact | EBI-1142759 |
| Escherichia coli | association | intact | EBI-1137743 |
| Escherichia coli | association | intact | EBI-1142354 |
| Escherichia coli | association | intact | EBI-891089  |

|                  |             |        |             |
|------------------|-------------|--------|-------------|
| Escherichia coli | association | intact | EBI-1147108 |
| Escherichia coli | association | intact | EBI-1143395 |
| Escherichia coli | association | intact | EBI-1146417 |
| Escherichia coli | association | intact | EBI-1146274 |
| Escherichia coli | association | intact | EBI-1146308 |
| Escherichia coli | association | intact | EBI-1142317 |
| Escherichia coli | association | intact | EBI-1138150 |
| Escherichia coli | association | intact | EBI-1138445 |
| Escherichia coli | association | intact | EBI-1144013 |
| Escherichia coli | association | intact | EBI-1143090 |
| Escherichia coli | association | intact | EBI-890236  |
| Escherichia coli | association | intact | EBI-1138798 |
| Escherichia coli | association | intact | EBI-1147310 |
| Escherichia coli | association | intact | EBI-1145286 |
| Escherichia coli | association | intact | EBI-1137410 |
| Escherichia coli | association | intact | EBI-884810  |
| Escherichia coli | association | intact | EBI-879261  |
| Escherichia coli | association | intact | EBI-1143317 |
| Escherichia coli | association | intact | EBI-892437  |
| Escherichia coli | association | intact | EBI-1144087 |
| Escherichia coli | association | intact | EBI-1147078 |
| Escherichia coli | association | intact | EBI-1145382 |
| Escherichia coli | association | intact | EBI-1144390 |
| Escherichia coli | association | intact | EBI-1138623 |
| Escherichia coli | association | intact | EBI-1146180 |
| Escherichia coli | association | intact | EBI-1144358 |
| Escherichia coli | association | intact | EBI-886668  |
| Escherichia coli | association | intact | EBI-1142107 |
| Escherichia coli | association | intact | EBI-892692  |
| Escherichia coli | association | intact | EBI-2463360 |
| Escherichia coli | association | intact | EBI-1135871 |
| Escherichia coli | association | intact | EBI-1147023 |
| Escherichia coli | association | intact | EBI-1144986 |
| Escherichia coli | association | intact | EBI-1143039 |
| Escherichia coli | association | intact | EBI-1141740 |
| Escherichia coli | association | intact | EBI-1141802 |
| Escherichia coli | association | intact | EBI-1144212 |
| Escherichia coli | association | intact | EBI-882523  |
| Escherichia coli | association | intact | EBI-1136246 |
| Escherichia coli | association | intact | EBI-881754  |
| Escherichia coli | association | intact | EBI-1137127 |
| Escherichia coli | association | intact | EBI-1137618 |
| Escherichia coli | association | intact | EBI-882921  |
| Escherichia coli | association | intact | EBI-1138675 |
| Escherichia coli | association | intact | EBI-1138811 |



|                  |             |        |             |
|------------------|-------------|--------|-------------|
| Escherichia coli | association | intact | EBI-1138952 |
| Escherichia coli | association | intact | EBI-1139450 |
| Escherichia coli | association | intact | EBI-893901  |
| Escherichia coli | association | intact | EBI-1140539 |
| Escherichia coli | association | intact | EBI-1141091 |
| Escherichia coli | association | intact | EBI-1141314 |
| Escherichia coli | association | intact | EBI-1141559 |
| Escherichia coli | association | intact | EBI-1141921 |
| Escherichia coli | association | intact | EBI-1142716 |
| Escherichia coli | association | intact | EBI-1143364 |
| Escherichia coli | association | intact | EBI-891722  |
| Escherichia coli | association | intact | EBI-1143631 |
| Escherichia coli | association | intact | EBI-1143609 |
| Escherichia coli | association | intact | EBI-1143850 |
| Escherichia coli | association | intact | EBI-1144039 |
| Escherichia coli | association | intact | EBI-1144619 |
| Escherichia coli | association | intact | EBI-1144951 |
| Escherichia coli | association | intact | EBI-1145047 |
| Escherichia coli | association | intact | EBI-1146016 |
| Escherichia coli | association | intact | EBI-1146826 |
| Escherichia coli | association | intact | EBI-1147242 |
| Escherichia coli | association | intact | EBI-1147830 |
| Escherichia coli | association | intact | EBI-1139043 |

|                  |             |        |             |
|------------------|-------------|--------|-------------|
| Escherichia coli | association | intact | EBI-889915  |
| Escherichia coli | association | intact | EBI-889682  |
| Escherichia coli | association | intact | EBI-891593  |
| Escherichia coli | association | intact | EBI-884189  |
| Escherichia coli | association | intact | EBI-883980  |
| Escherichia coli | association | intact | EBI-881486  |
| Escherichia coli | association | intact | EBI-894927  |
| Escherichia coli | association | intact | EBI-888030  |
| Escherichia coli | association | intact | EBI-1137559 |
| Escherichia coli | association | intact | EBI-1135798 |
| Escherichia coli | association | intact | EBI-894594  |
| Escherichia coli | association | intact | EBI-895127  |
| Escherichia coli | association | intact | EBI-894497  |
| Escherichia coli | association | intact | EBI-892010  |
| Escherichia coli | association | intact | EBI-890236  |
| Escherichia coli | association | intact | EBI-884810  |
| Escherichia coli | association | intact | EBI-892437  |
| Escherichia coli | association | intact | EBI-885881  |
| Escherichia coli | association | intact | EBI-886668  |
| Escherichia coli | association | intact | EBI-887918  |
| Escherichia coli | association | intact | EBI-881754  |

|                  |             |        |             |
|------------------|-------------|--------|-------------|
| Escherichia coli | association | intact | EBI-891424  |
| Escherichia coli | association | intact | EBI-1143889 |
| Escherichia coli | association | intact | EBI-1145671 |
| Escherichia coli | association | intact | EBI-887431  |
| Escherichia coli | association | intact | EBI-888995  |
| Escherichia coli | association | intact | EBI-889682  |
| Escherichia coli | association | intact | EBI-886162  |
| Escherichia coli | association | intact | EBI-1142209 |
| Escherichia coli | association | intact | EBI-885677  |
| Escherichia coli | association | intact | EBI-1146553 |
| Escherichia coli | association | intact | EBI-884584  |
| Escherichia coli | association | intact | EBI-884189  |
| Escherichia coli | association | intact | EBI-883980  |
| Escherichia coli | association | intact | EBI-883767  |
| Escherichia coli | association | intact | EBI-883848  |
| Escherichia coli | association | intact | EBI-1142775 |
| Escherichia coli | association | intact | EBI-1136666 |
| Escherichia coli | association | intact | EBI-881486  |
| Escherichia coli | association | intact | EBI-1147952 |
| Escherichia coli | association | intact | EBI-887858  |
| Escherichia coli | association | intact | EBI-883621  |
| Escherichia coli | association | intact | EBI-890853  |
| Escherichia coli | association | intact | EBI-1146884 |
| Escherichia coli | association | intact | EBI-887293  |
| Escherichia coli | association | intact | EBI-887148  |
| Escherichia coli | association | intact | EBI-888300  |
| Escherichia coli | association | intact | EBI-891005  |
| Escherichia coli | association | intact | EBI-887368  |
| Escherichia coli | association | intact | EBI-1135340 |
| Escherichia coli | association | intact | EBI-1141372 |
| Escherichia coli | association | intact | EBI-888219  |
| Escherichia coli | association | intact | EBI-1143469 |
| Escherichia coli | association | intact | EBI-886556  |
| Escherichia coli | association | intact | EBI-891254  |
| Escherichia coli | association | intact | EBI-885330  |
| Escherichia coli | association | intact | EBI-888700  |
| Escherichia coli | association | intact | EBI-880750  |
| Escherichia coli | association | intact | EBI-883484  |
| Escherichia coli | association | intact | EBI-894403  |
| Escherichia coli | association | intact | EBI-888757  |
| Escherichia coli | association | intact | EBI-881294  |
| Escherichia coli | association | intact | EBI-883387  |
| Escherichia coli | association | intact | EBI-892581  |
| Escherichia coli | association | intact | EBI-892599  |

|                  |             |        |             |
|------------------|-------------|--------|-------------|
| Escherichia coli | association | intact | EBI-879887  |
| Escherichia coli | association | intact | EBI-889983  |
| Escherichia coli | association | intact | EBI-881701  |
| Escherichia coli | association | intact | EBI-893916  |
| Escherichia coli | association | intact | EBI-1146441 |
| Escherichia coli | association | intact | EBI-893117  |
| Escherichia coli | association | intact | EBI-1145014 |
| Escherichia coli | association | intact | EBI-1140341 |
| Escherichia coli | association | intact | EBI-893285  |
| Escherichia coli | association | intact | EBI-887500  |
| Escherichia coli | association | intact | EBI-884958  |
| Escherichia coli | association | intact | EBI-891798  |
| Escherichia coli | association | intact | EBI-887088  |
| Escherichia coli | association | intact | EBI-884491  |
| Escherichia coli | association | intact | EBI-1144067 |
| Escherichia coli | association | intact | EBI-895127  |
| Escherichia coli | association | intact | EBI-882652  |
| Escherichia coli | association | intact | EBI-882754  |
| Escherichia coli | association | intact | EBI-1143946 |
| Escherichia coli | association | intact | EBI-892949  |
| Escherichia coli | association | intact | EBI-894235  |
| Escherichia coli | association | intact | EBI-894497  |
| Escherichia coli | association | intact | EBI-885288  |
| Escherichia coli | association | intact | EBI-892010  |
| Escherichia coli | association | intact | EBI-889536  |
| Escherichia coli | association | intact | EBI-882671  |
| Escherichia coli | association | intact | EBI-890236  |
| Escherichia coli | association | intact | EBI-884810  |
| Escherichia coli | association | intact | EBI-883271  |
| Escherichia coli | association | intact | EBI-883046  |
| Escherichia coli | association | intact | EBI-892741  |
| Escherichia coli | association | intact | EBI-892437  |
| Escherichia coli | association | intact | EBI-885881  |
| Escherichia coli | association | intact | EBI-890918  |
| Escherichia coli | association | intact | EBI-881988  |
| Escherichia coli | association | intact | EBI-886668  |
| Escherichia coli | association | intact | EBI-889827  |
| Escherichia coli | association | intact | EBI-884548  |
| Escherichia coli | association | intact | EBI-892692  |
| Escherichia coli | association | intact | EBI-882273  |
| Escherichia coli | association | intact | EBI-1142262 |
| Escherichia coli | association | intact | EBI-894652  |
| Escherichia coli | association | intact | EBI-1141234 |
| Escherichia coli | association | intact | EBI-1139703 |
| Escherichia coli | association | intact | EBI-887152  |

|                  |             |        |             |
|------------------|-------------|--------|-------------|
| Escherichia coli | association | intact | EBI-1141802 |
| Escherichia coli | association | intact | EBI-881754  |
| Escherichia coli | association | intact | EBI-893410  |
| Escherichia coli | association | intact | EBI-882921  |
| Escherichia coli | association | intact | EBI-886031  |
| Escherichia coli | association | intact | EBI-1140433 |
| Escherichia coli | association | intact | EBI-1141987 |
| Escherichia coli | association | intact | EBI-1142510 |
| Escherichia coli | association | intact | EBI-1144951 |
| Escherichia coli | association | intact | EBI-887431  |
| Escherichia coli | association | intact | EBI-1147927 |

|                  |             |        |             |
|------------------|-------------|--------|-------------|
| Escherichia coli | association | intact | EBI-1143271 |
| Escherichia coli | association | intact | EBI-1142195 |
| Escherichia coli | association | intact | EBI-1146450 |
| Escherichia coli | association | intact | EBI-1139291 |
| Escherichia coli | association | intact | EBI-880730  |
| Escherichia coli | association | intact | EBI-1142184 |
| Escherichia coli | association | intact | EBI-1141014 |
| Escherichia coli | association | intact | EBI-889682  |
| Escherichia coli | association | intact | EBI-1137163 |
| Escherichia coli | association | intact | EBI-1144302 |
| Escherichia coli | association | intact | EBI-1142346 |
| Escherichia coli | association | intact | EBI-1140682 |
| Escherichia coli | association | intact | EBI-1141998 |
| Escherichia coli | association | intact | EBI-1140568 |
| Escherichia coli | association | intact | EBI-885677  |
| Escherichia coli | association | intact | EBI-1138573 |
| Escherichia coli | association | intact | EBI-1144661 |
| Escherichia coli | association | intact | EBI-1142153 |
| Escherichia coli | association | intact | EBI-1138254 |
| Escherichia coli | association | intact | EBI-1143404 |
| Escherichia coli | association | intact | EBI-1146120 |
| Escherichia coli | association | intact | EBI-1140146 |
| Escherichia coli | association | intact | EBI-879643  |
| Escherichia coli | association | intact | EBI-883980  |
| Escherichia coli | association | intact | EBI-1140933 |
| Escherichia coli | association | intact | EBI-879539  |
| Escherichia coli | association | intact | EBI-879589  |
| Escherichia coli | association | intact | EBI-1137461 |
| Escherichia coli | association | intact | EBI-1138538 |
| Escherichia coli | association | intact | EBI-1140130 |
| Escherichia coli | association | intact | EBI-1147520 |
| Escherichia coli | association | intact | EBI-1147250 |
| Escherichia coli | association | intact | EBI-1136666 |

|                  |                      |        |             |
|------------------|----------------------|--------|-------------|
| Escherichia coli | association          | intact | EBI-1141506 |
| Escherichia coli | association          | intact | EBI-1140079 |
| Escherichia coli | association          | intact | EBI-880564  |
| Escherichia coli | association          | intact | EBI-888958  |
| Escherichia coli | association          | intact | EBI-881486  |
| Escherichia coli | association          | intact | EBI-878632  |
| Escherichia coli | association          | intact | EBI-1138895 |
| Escherichia coli | association          | intact | EBI-1144923 |
| Escherichia coli | association          | intact | EBI-890702  |
| Escherichia coli | association          | intact | EBI-883418  |
| Escherichia coli | association          | intact | EBI-1146094 |
| Escherichia coli | association          | intact | EBI-1142399 |
| Escherichia coli | association          | intact | EBI-1142392 |
| Escherichia coli | association          | intact | EBI-1143298 |
| Escherichia coli | association          | intact | EBI-1142893 |
| Escherichia coli | association          | intact | EBI-887293  |
| Escherichia coli | association          | intact | EBI-1142565 |
| Escherichia coli | association          | intact | EBI-887148  |
| Escherichia coli | association          | intact | EBI-1146787 |
| Escherichia coli | association          | intact | EBI-1142607 |
| Escherichia coli | association          | intact | EBI-1139940 |
| Escherichia coli | association          | intact | EBI-887941  |
| Escherichia coli | association          | intact | EBI-1145333 |
| Escherichia coli | association          | intact | EBI-1135340 |
| Escherichia coli | association          | intact | EBI-1137688 |
| Escherichia coli | association          | intact | EBI-1144218 |
| Escherichia coli | association          | intact | EBI-1138768 |
| Escherichia coli | association          | intact | EBI-1141425 |
| Escherichia coli | association          | intact | EBI-1141446 |
| Escherichia coli | association          | intact | EBI-1141480 |
| Escherichia coli | association          | intact | EBI-1142560 |
| Escherichia coli | association          | intact | EBI-1140172 |
| Escherichia coli | association          | intact | EBI-888030  |
| Escherichia coli | association          | intact | EBI-1140245 |
| Escherichia coli | association          | intact | EBI-1141898 |
| Escherichia coli | association          | intact | EBI-1144485 |
| Escherichia coli | association          | intact | EBI-1146586 |
| Escherichia coli | association          | intact | EBI-1146848 |
| Escherichia coli | association          | intact | EBI-1143235 |
| Escherichia coli | association          | intact | EBI-1145859 |
| Escherichia coli | association          | intact | EBI-1135932 |
| Escherichia coli | association          | intact | EBI-883047  |
| Escherichia coli | physical association | intact | EBI-1145586 |
| Escherichia coli | association          | intact | EBI-1146841 |
| Escherichia coli | association          | intact | EBI-1147629 |

|                  |                      |        |             |
|------------------|----------------------|--------|-------------|
| Escherichia coli | association          | intact | EBI-880595  |
| Escherichia coli | association          | intact | EBI-1147620 |
| Escherichia coli | association          | intact | EBI-1138862 |
| Escherichia coli | association          | intact | EBI-880166  |
| Escherichia coli | association          | intact | EBI-885330  |
| Escherichia coli | association          | intact | EBI-1143130 |
| Escherichia coli | association          | intact | EBI-1145795 |
| Escherichia coli | association          | intact | EBI-880750  |
| Escherichia coli | association          | intact | EBI-894374  |
| Escherichia coli | association          | intact | EBI-1138705 |
| Escherichia coli | association          | intact | EBI-1138503 |
| Escherichia coli | association          | intact | EBI-1138515 |
| Escherichia coli | association          | intact | EBI-1144514 |
| Escherichia coli | association          | intact | EBI-1143736 |
| Escherichia coli | association          | intact | EBI-1143023 |
| Escherichia coli | association          | intact | EBI-1147786 |
| Escherichia coli | association          | intact | EBI-883484  |
| Escherichia coli | physical association | intact | EBI-1143528 |
| Escherichia coli | association          | intact | EBI-1147790 |
| Escherichia coli | association          | intact | EBI-1137105 |
| Escherichia coli | association          | intact | EBI-1140208 |
| Escherichia coli | association          | intact | EBI-1143152 |
| Escherichia coli | association          | intact | EBI-1143170 |
| Escherichia coli | association          | intact | EBI-1143113 |
| Escherichia coli | association          | intact | EBI-1136547 |
| Escherichia coli | physical association | intact | EBI-1145102 |
| Escherichia coli | association          | intact | EBI-1138857 |
| Escherichia coli | association          | intact | EBI-886059  |
| Escherichia coli | association          | intact | EBI-1135798 |
| Escherichia coli | association          | intact | EBI-1136749 |
| Escherichia coli | association          | intact | EBI-1140299 |
| Escherichia coli | association          | intact | EBI-1140303 |
| Escherichia coli | association          | intact | EBI-1140263 |
| Escherichia coli | association          | intact | EBI-1141773 |
| Escherichia coli | association          | intact | EBI-1139747 |
| Escherichia coli | association          | intact | EBI-1139015 |
| Escherichia coli | association          | intact | EBI-1147418 |
| Escherichia coli | association          | intact | EBI-1147482 |
| Escherichia coli | association          | intact | EBI-1138903 |
| Escherichia coli | association          | intact | EBI-1137637 |
| Escherichia coli | association          | intact | EBI-1139075 |
| Escherichia coli | association          | intact | EBI-1140351 |
| Escherichia coli | association          | intact | EBI-1138978 |
| Escherichia coli | association          | intact | EBI-1138694 |
| Escherichia coli | association          | intact | EBI-1138724 |

|                  |                      |        |             |
|------------------|----------------------|--------|-------------|
| Escherichia coli | association          | intact | EBI-1144720 |
| Escherichia coli | association          | intact | EBI-889622  |
| Escherichia coli | association          | intact | EBI-1138378 |
| Escherichia coli | association          | intact | EBI-1138371 |
| Escherichia coli | association          | intact | EBI-1144107 |
| Escherichia coli | association          | intact | EBI-1144471 |
| Escherichia coli | association          | intact | EBI-1138891 |
| Escherichia coli | association          | intact | EBI-1142158 |
| Escherichia coli | association          | intact | EBI-879814  |
| Escherichia coli | association          | intact | EBI-1143718 |
| Escherichia coli | association          | intact | EBI-1138921 |
| Escherichia coli | association          | intact | EBI-1142334 |
| Escherichia coli | association          | intact | EBI-886823  |
| Escherichia coli | association          | intact | EBI-1145014 |
| Escherichia coli | association          | intact | EBI-886705  |
| Escherichia coli | association          | intact | EBI-1145063 |
| Escherichia coli | association          | intact | EBI-1139751 |
| Escherichia coli | association          | intact | EBI-1139767 |
| Escherichia coli | association          | intact | EBI-1144556 |
| Escherichia coli | association          | intact | EBI-1143101 |
| Escherichia coli | association          | intact | EBI-887500  |
| Escherichia coli | association          | intact | EBI-1137743 |
| Escherichia coli | association          | intact | EBI-891798  |
| Escherichia coli | association          | intact | EBI-1142354 |
| Escherichia coli | association          | intact | EBI-1138406 |
| Escherichia coli | association          | intact | EBI-883913  |
| Escherichia coli | association          | intact | EBI-1138534 |
| Escherichia coli | physical association | intact | EBI-1140524 |
| Escherichia coli | association          | intact | EBI-1147108 |
| Escherichia coli | association          | intact | EBI-1147664 |
| Escherichia coli | association          | intact | EBI-1136768 |
| Escherichia coli | association          | intact | EBI-1143395 |
| Escherichia coli | association          | intact | EBI-1142065 |
| Escherichia coli | association          | intact | EBI-1144067 |
| Escherichia coli | association          | intact | EBI-1140985 |
| Escherichia coli | association          | intact | EBI-1141007 |
| Escherichia coli | association          | intact | EBI-895127  |
| Escherichia coli | association          | intact | EBI-1144579 |
| Escherichia coli | association          | intact | EBI-1139617 |
| Escherichia coli | association          | intact | EBI-882652  |
| Escherichia coli | association          | intact | EBI-1143694 |
| Escherichia coli | association          | intact | EBI-1146417 |
| Escherichia coli | association          | intact | EBI-1143946 |
| Escherichia coli | physical association | intact | EBI-1146336 |
| Escherichia coli | association          | intact | EBI-1146286 |

|                  |             |        |             |
|------------------|-------------|--------|-------------|
| Escherichia coli | association | intact | EBI-1146274 |
| Escherichia coli | association | intact | EBI-1146349 |
| Escherichia coli | association | intact | EBI-1146342 |
| Escherichia coli | association | intact | EBI-1146684 |
| Escherichia coli | association | intact | EBI-1138014 |
| Escherichia coli | association | intact | EBI-1138445 |
| Escherichia coli | association | intact | EBI-1144013 |
| Escherichia coli | association | intact | EBI-885288  |
| Escherichia coli | association | intact | EBI-892010  |
| Escherichia coli | association | intact | EBI-1143090 |
| Escherichia coli | association | intact | EBI-878697  |
| Escherichia coli | association | intact | EBI-882671  |
| Escherichia coli | association | intact | EBI-890236  |
| Escherichia coli | association | intact | EBI-1138798 |
| Escherichia coli | association | intact | EBI-1143426 |
| Escherichia coli | association | intact | EBI-1138987 |
| Escherichia coli | association | intact | EBI-888473  |
| Escherichia coli | association | intact | EBI-849332  |
| Escherichia coli | association | intact | EBI-849381  |
| Escherichia coli | association | intact | EBI-893488  |
| Escherichia coli | association | intact | EBI-849464  |
| Escherichia coli | association | intact | EBI-1145286 |
| Escherichia coli | association | intact | EBI-881230  |
| Escherichia coli | association | intact | EBI-1137410 |
| Escherichia coli | association | intact | EBI-879914  |
| Escherichia coli | association | intact | EBI-884810  |
| Escherichia coli | association | intact | EBI-1146535 |
| Escherichia coli | association | intact | EBI-891136  |
| Escherichia coli | association | intact | EBI-883997  |
| Escherichia coli | association | intact | EBI-879354  |
| Escherichia coli | association | intact | EBI-1145418 |
| Escherichia coli | association | intact | EBI-879304  |
| Escherichia coli | association | intact | EBI-1147178 |
| Escherichia coli | association | intact | EBI-879261  |
| Escherichia coli | association | intact | EBI-883046  |
| Escherichia coli | association | intact | EBI-1147184 |
| Escherichia coli | association | intact | EBI-886257  |
| Escherichia coli | association | intact | EBI-879161  |
| Escherichia coli | association | intact | EBI-892437  |
| Escherichia coli | association | intact | EBI-885881  |
| Escherichia coli | association | intact | EBI-1144087 |
| Escherichia coli | association | intact | EBI-1145382 |
| Escherichia coli | association | intact | EBI-1147905 |
| Escherichia coli | association | intact | EBI-1145973 |
| Escherichia coli | association | intact | EBI-1138195 |



|                  |                      |        |             |
|------------------|----------------------|--------|-------------|
| Escherichia coli | association          | intact | EBI-1138614 |
| Escherichia coli | association          | intact | EBI-1138623 |
| Escherichia coli | association          | intact | EBI-1144410 |
| Escherichia coli | association          | intact | EBI-883733  |
| Escherichia coli | association          | intact | EBI-1146180 |
| Escherichia coli | association          | intact | EBI-1140712 |
| Escherichia coli | association          | intact | EBI-1138319 |
| Escherichia coli | association          | intact | EBI-1145105 |
| Escherichia coli | association          | intact | EBI-1145355 |
| Escherichia coli | association          | intact | EBI-1140393 |
| Escherichia coli | association          | intact | EBI-1147374 |
| Escherichia coli | association          | intact | EBI-1144358 |
| Escherichia coli | association          | intact | EBI-880676  |
| Escherichia coli | association          | intact | EBI-886668  |
| Escherichia coli | association          | intact | EBI-1142107 |
| Escherichia coli | association          | intact | EBI-1144382 |
| Escherichia coli | association          | intact | EBI-887918  |
| Escherichia coli | association          | intact | EBI-889906  |
| Escherichia coli | association          | intact | EBI-1143343 |
| Escherichia coli | association          | intact | EBI-1138435 |
| Escherichia coli | association          | intact | EBI-1140113 |
| Escherichia coli | association          | intact | EBI-1139684 |
| Escherichia coli | association          | intact | EBI-1143623 |
| Escherichia coli | association          | intact | EBI-1147006 |
| Escherichia coli | physical association | intact | EBI-1141964 |
| Escherichia coli | association          | intact | EBI-1139830 |
| Escherichia coli | association          | intact | EBI-886205  |
| Escherichia coli | association          | intact | EBI-892692  |
| Escherichia coli | association          | intact | EBI-1136559 |
| Escherichia coli | association          | intact | EBI-2463360 |
| Escherichia coli | association          | intact | EBI-1135871 |
| Escherichia coli | association          | intact | EBI-1145280 |
| Escherichia coli | physical association | intact | EBI-1138559 |
| Escherichia coli | association          | intact | EBI-1147746 |
| Escherichia coli | association          | intact | EBI-882273  |
| Escherichia coli | association          | intact | EBI-1146227 |
| Escherichia coli | association          | intact | EBI-1139361 |
| Escherichia coli | association          | intact | EBI-1144986 |
| Escherichia coli | association          | intact | EBI-1143804 |
| Escherichia coli | association          | intact | EBI-1144077 |
| Escherichia coli | association          | intact | EBI-1142527 |
| Escherichia coli | association          | intact | EBI-1143357 |
| Escherichia coli | association          | intact | EBI-887152  |
| Escherichia coli | association          | intact | EBI-880917  |
| Escherichia coli | association          | intact | EBI-1141304 |

|                  |                      |        |             |
|------------------|----------------------|--------|-------------|
| Escherichia coli | association          | intact | EBI-1141786 |
| Escherichia coli | association          | intact | EBI-1141740 |
| Escherichia coli | association          | intact | EBI-1141802 |
| Escherichia coli | association          | intact | EBI-882523  |
| Escherichia coli | association          | intact | EBI-879082  |
| Escherichia coli | association          | intact | EBI-1135902 |
| Escherichia coli | association          | intact | EBI-1135971 |
| Escherichia coli | association          | intact | EBI-1136842 |
| Escherichia coli | association          | intact | EBI-1137618 |
| Escherichia coli | association          | intact | EBI-879840  |
| Escherichia coli | association          | intact | EBI-1138038 |
| Escherichia coli | association          | intact | EBI-1138226 |
| Escherichia coli | association          | intact | EBI-882921  |
| Escherichia coli | association          | intact | EBI-879208  |
| Escherichia coli | association          | intact | EBI-1138231 |
| Escherichia coli | association          | intact | EBI-1138303 |
| Escherichia coli | association          | intact | EBI-1138481 |
| Escherichia coli | association          | intact | EBI-1138593 |
| Escherichia coli | association          | intact | EBI-1138657 |
| Escherichia coli | association          | intact | EBI-1138675 |
| Escherichia coli | association          | intact | EBI-1138713 |
| Escherichia coli | association          | intact | EBI-1138952 |
| Escherichia coli | association          | intact | EBI-1139123 |
| Escherichia coli | association          | intact | EBI-1139089 |
| Escherichia coli | association          | intact | EBI-1139110 |
| Escherichia coli | association          | intact | EBI-1139033 |
| Escherichia coli | association          | intact | EBI-1139235 |
| Escherichia coli | association          | intact | EBI-1139450 |
| Escherichia coli | association          | intact | EBI-1139564 |
| Escherichia coli | association          | intact | EBI-1139627 |
| Escherichia coli | association          | intact | EBI-1139780 |
| Escherichia coli | physical association | intact | EBI-1139797 |
| Escherichia coli | association          | intact | EBI-1139836 |
| Escherichia coli | association          | intact | EBI-1139892 |
| Escherichia coli | association          | intact | EBI-1140539 |
| Escherichia coli | association          | intact | EBI-1140602 |
| Escherichia coli | association          | intact | EBI-1140837 |
| Escherichia coli | association          | intact | EBI-1141281 |
| Escherichia coli | association          | intact | EBI-1141314 |
| Escherichia coli | association          | intact | EBI-1141389 |
| Escherichia coli | association          | intact | EBI-1141395 |
| Escherichia coli | association          | intact | EBI-1142052 |
| Escherichia coli | association          | intact | EBI-1142138 |
| Escherichia coli | association          | intact | EBI-1142246 |
| Escherichia coli | association          | intact | EBI-1142416 |

|                  |                      |        |             |
|------------------|----------------------|--------|-------------|
| Escherichia coli | association          | intact | EBI-1142574 |
| Escherichia coli | association          | intact | EBI-1142614 |
| Escherichia coli | physical association | intact | EBI-1142632 |
| Escherichia coli | association          | intact | EBI-1142644 |
| Escherichia coli | association          | intact | EBI-1142716 |
| Escherichia coli | association          | intact | EBI-1142963 |
| Escherichia coli | association          | intact | EBI-1143031 |
| Escherichia coli | association          | intact | EBI-879491  |
| Escherichia coli | association          | intact | EBI-891424  |
| Escherichia coli | association          | intact | EBI-1143364 |
| Escherichia coli | association          | intact | EBI-1143417 |
| Escherichia coli | association          | intact | EBI-1143500 |
| Escherichia coli | association          | intact | EBI-1143617 |
| Escherichia coli | association          | intact | EBI-1143609 |
| Escherichia coli | physical association | intact | EBI-1143903 |
| Escherichia coli | association          | intact | EBI-1143850 |
| Escherichia coli | association          | intact | EBI-1144158 |
| Escherichia coli | association          | intact | EBI-1144308 |
| Escherichia coli | association          | intact | EBI-1144314 |
| Escherichia coli | association          | intact | EBI-1144453 |
| Escherichia coli | association          | intact | EBI-1144423 |
| Escherichia coli | association          | intact | EBI-1144619 |
| Escherichia coli | association          | intact | EBI-1144775 |
| Escherichia coli | association          | intact | EBI-1144787 |
| Escherichia coli | physical association | intact | EBI-1145160 |
| Escherichia coli | association          | intact | EBI-1144931 |
| Escherichia coli | association          | intact | EBI-1144937 |
| Escherichia coli | association          | intact | EBI-1144951 |
| Escherichia coli | association          | intact | EBI-881886  |
| Escherichia coli | association          | intact | EBI-1145047 |
| Escherichia coli | association          | intact | EBI-1145259 |
| Escherichia coli | association          | intact | EBI-1146016 |
| Escherichia coli | association          | intact | EBI-890038  |
| Escherichia coli | association          | intact | EBI-1146826 |
| Escherichia coli | association          | intact | EBI-1147273 |
| Escherichia coli | association          | intact | EBI-1147242 |
| Escherichia coli | association          | intact | EBI-1147709 |
| Escherichia coli | association          | intact | EBI-1147779 |
| Escherichia coli | association          | intact | EBI-1135979 |
| Escherichia coli | physical association | intact | EBI-1138169 |
| Escherichia coli | association          | intact | EBI-1139043 |
| Escherichia coli | association          | intact | EBI-1139487 |
| Escherichia coli | association          | intact | EBI-1139792 |
| Escherichia coli | association          | intact | EBI-1140044 |
| Escherichia coli | association          | intact | EBI-1140703 |

|                  |             |        |             |
|------------------|-------------|--------|-------------|
| Escherichia coli | association | intact | EBI-1140958 |
| Escherichia coli | association | intact | EBI-1140972 |
| Escherichia coli | association | intact | EBI-1142812 |
| Escherichia coli | association | intact | EBI-1143971 |
| Escherichia coli | association | intact | EBI-1144399 |
| Escherichia coli | association | intact | EBI-1144607 |
| Escherichia coli | association | intact | EBI-1144912 |
| Escherichia coli | association | intact | EBI-1141067 |
|                  |             |        |             |
| Escherichia coli | association | intact | EBI-1140315 |
| Escherichia coli | association | intact | EBI-1142392 |
| Escherichia coli | association | intact | EBI-887368  |
| Escherichia coli | association | intact | EBI-888109  |
| Escherichia coli | association | intact | EBI-886556  |
| Escherichia coli | association | intact | EBI-882104  |
| Escherichia coli | association | intact | EBI-892341  |
| Escherichia coli | association | intact | EBI-883387  |
| Escherichia coli | association | intact | EBI-889577  |
| Escherichia coli | association | intact | EBI-892532  |
| Escherichia coli | association | intact | EBI-892599  |
| Escherichia coli | association | intact | EBI-881427  |
| Escherichia coli | association | intact | EBI-893285  |
| Escherichia coli | association | intact | EBI-882652  |
| Escherichia coli | association | intact | EBI-894195  |
| Escherichia coli | association | intact | EBI-892010  |
| Escherichia coli | association | intact | EBI-890236  |
| Escherichia coli | association | intact | EBI-884810  |
| Escherichia coli | association | intact | EBI-891136  |
| Escherichia coli | association | intact | EBI-892437  |
| Escherichia coli | association | intact | EBI-890918  |
| Escherichia coli | association | intact | EBI-887918  |
| Escherichia coli | association | intact | EBI-892692  |
| Escherichia coli | association | intact | EBI-887152  |
| Escherichia coli | association | intact | EBI-1141500 |
| Escherichia coli | association | intact | EBI-1136788 |
| Escherichia coli | association | intact | EBI-881754  |
| Escherichia coli | association | intact | EBI-882921  |
| Escherichia coli | association | intact | EBI-1138389 |
| Escherichia coli | association | intact | EBI-886031  |
| Escherichia coli | association | intact | EBI-891424  |
| Escherichia coli | association | intact | EBI-1144233 |
| Escherichia coli | association | intact | EBI-889393  |
| Escherichia coli | association | intact | EBI-887431  |
|                  |             |        |             |
| Escherichia coli | association | intact | EBI-890114  |

|                  |             |        |             |
|------------------|-------------|--------|-------------|
| Escherichia coli | association | intact | EBI-888995  |
| Escherichia coli | association | intact | EBI-889682  |
| Escherichia coli | association | intact | EBI-882266  |
| Escherichia coli | association | intact | EBI-891593  |
| Escherichia coli | association | intact | EBI-891673  |
| Escherichia coli | association | intact | EBI-891481  |
| Escherichia coli | association | intact | EBI-883980  |
| Escherichia coli | association | intact | EBI-1137461 |
| Escherichia coli | association | intact | EBI-1136666 |
| Escherichia coli | association | intact | EBI-894157  |
| Escherichia coli | association | intact | EBI-881486  |
| Escherichia coli | association | intact | EBI-1143298 |
| Escherichia coli | association | intact | EBI-888300  |
| Escherichia coli | association | intact | EBI-891005  |
| Escherichia coli | association | intact | EBI-888109  |
| Escherichia coli | association | intact | EBI-888030  |
| Escherichia coli | association | intact | EBI-894532  |
| Escherichia coli | association | intact | EBI-887624  |
| Escherichia coli | association | intact | EBI-886556  |
| Escherichia coli | association | intact | EBI-885289  |
| Escherichia coli | association | intact | EBI-886859  |
| Escherichia coli | association | intact | EBI-892341  |
| Escherichia coli | association | intact | EBI-883484  |
| Escherichia coli | association | intact | EBI-1136828 |
| Escherichia coli | association | intact | EBI-888757  |
| Escherichia coli | association | intact | EBI-883387  |
| Escherichia coli | association | intact | EBI-888472  |
| Escherichia coli | association | intact | EBI-894571  |
| Escherichia coli | association | intact | EBI-892532  |
| Escherichia coli | association | intact | EBI-892599  |
| Escherichia coli | association | intact | EBI-886059  |
| Escherichia coli | association | intact | EBI-1136749 |
| Escherichia coli | association | intact | EBI-890053  |
| Escherichia coli | association | intact | EBI-1138921 |
| Escherichia coli | association | intact | EBI-892247  |
| Escherichia coli | association | intact | EBI-881427  |
| Escherichia coli | association | intact | EBI-893285  |
| Escherichia coli | association | intact | EBI-884958  |
| Escherichia coli | association | intact | EBI-891089  |
| Escherichia coli | association | intact | EBI-893445  |
| Escherichia coli | association | intact | EBI-895127  |
| Escherichia coli | association | intact | EBI-882652  |
| Escherichia coli | association | intact | EBI-892949  |
| Escherichia coli | association | intact | EBI-894235  |
| Escherichia coli | association | intact | EBI-894195  |

|                  |             |        |             |
|------------------|-------------|--------|-------------|
| Escherichia coli | association | intact | EBI-892010  |
| Escherichia coli | association | intact | EBI-889536  |
| Escherichia coli | association | intact | EBI-890236  |
| Escherichia coli | association | intact | EBI-1138798 |
| Escherichia coli | association | intact | EBI-893488  |
| Escherichia coli | association | intact | EBI-884810  |
| Escherichia coli | association | intact | EBI-891136  |
| Escherichia coli | association | intact | EBI-883271  |
| Escherichia coli | association | intact | EBI-892741  |
| Escherichia coli | association | intact | EBI-892437  |
| Escherichia coli | association | intact | EBI-890918  |
| Escherichia coli | association | intact | EBI-881988  |
| Escherichia coli | association | intact | EBI-886668  |
| Escherichia coli | association | intact | EBI-887918  |
| Escherichia coli | association | intact | EBI-889827  |
| Escherichia coli | association | intact | EBI-892692  |
| Escherichia coli | association | intact | EBI-894652  |
| Escherichia coli | association | intact | EBI-887152  |
| Escherichia coli | association | intact | EBI-882523  |
| Escherichia coli | association | intact | EBI-881754  |
| Escherichia coli | association | intact | EBI-892986  |
| Escherichia coli | association | intact | EBI-882921  |
| Escherichia coli | association | intact | EBI-891354  |
| Escherichia coli | association | intact | EBI-889393  |
| Escherichia coli | association | intact | EBI-889915  |
| Escherichia coli | association | intact | EBI-890114  |
| Escherichia coli | association | intact | EBI-882138  |
| Escherichia coli | association | intact | EBI-888995  |
| Escherichia coli | association | intact | EBI-886162  |
| Escherichia coli | association | intact | EBI-882266  |
| Escherichia coli | association | intact | EBI-885677  |
| Escherichia coli | association | intact | EBI-1146553 |
| Escherichia coli | association | intact | EBI-1141216 |
| Escherichia coli | association | intact | EBI-891673  |
| Escherichia coli | association | intact | EBI-883908  |
| Escherichia coli | association | intact | EBI-883980  |
| Escherichia coli | association | intact | EBI-883726  |
| Escherichia coli | association | intact | EBI-894157  |
| Escherichia coli | association | intact | EBI-888958  |
| Escherichia coli | association | intact | EBI-881486  |
| Escherichia coli | association | intact | EBI-887858  |
| Escherichia coli | association | intact | EBI-890702  |
| Escherichia coli | association | intact | EBI-883621  |
| Escherichia coli | association | intact | EBI-885002  |

|                  |             |        |             |
|------------------|-------------|--------|-------------|
| Escherichia coli | association | intact | EBI-894927  |
| Escherichia coli | association | intact | EBI-887148  |
| Escherichia coli | association | intact | EBI-1146889 |
| Escherichia coli | association | intact | EBI-891005  |
| Escherichia coli | association | intact | EBI-887368  |
| Escherichia coli | association | intact | EBI-1137688 |
| Escherichia coli | association | intact | EBI-888030  |
| Escherichia coli | association | intact | EBI-885867  |
| Escherichia coli | association | intact | EBI-893878  |
| Escherichia coli | association | intact | EBI-882023  |
| Escherichia coli | association | intact | EBI-886556  |
| Escherichia coli | association | intact | EBI-895331  |
| Escherichia coli | association | intact | EBI-885490  |
| Escherichia coli | association | intact | EBI-885330  |
| Escherichia coli | association | intact | EBI-888700  |
| Escherichia coli | association | intact | EBI-880750  |
| Escherichia coli | association | intact | EBI-886859  |
| Escherichia coli | association | intact | EBI-892341  |
| Escherichia coli | association | intact | EBI-883484  |
| Escherichia coli | association | intact | EBI-894403  |
| Escherichia coli | association | intact | EBI-888757  |
| Escherichia coli | association | intact | EBI-881294  |
| Escherichia coli | association | intact | EBI-883387  |
| Escherichia coli | association | intact | EBI-893163  |
| Escherichia coli | association | intact | EBI-892932  |
| Escherichia coli | association | intact | EBI-888472  |
| Escherichia coli | association | intact | EBI-894571  |
| Escherichia coli | association | intact | EBI-892532  |
| Escherichia coli | association | intact | EBI-892599  |
| Escherichia coli | association | intact | EBI-1138239 |
| Escherichia coli | association | intact | EBI-889363  |
| Escherichia coli | association | intact | EBI-894976  |
| Escherichia coli | association | intact | EBI-889983  |
| Escherichia coli | association | intact | EBI-894594  |
| Escherichia coli | association | intact | EBI-894012  |
| Escherichia coli | association | intact | EBI-1146441 |
| Escherichia coli | association | intact | EBI-893117  |
| Escherichia coli | association | intact | EBI-886823  |
| Escherichia coli | association | intact | EBI-893067  |
| Escherichia coli | association | intact | EBI-881427  |
| Escherichia coli | association | intact | EBI-890645  |
| Escherichia coli | association | intact | EBI-893285  |
| Escherichia coli | association | intact | EBI-887500  |
| Escherichia coli | association | intact | EBI-884958  |
| Escherichia coli | association | intact | EBI-891798  |

|                  |             |        |             |
|------------------|-------------|--------|-------------|
| Escherichia coli | association | intact | EBI-887088  |
| Escherichia coli | association | intact | EBI-891089  |
| Escherichia coli | association | intact | EBI-884491  |
| Escherichia coli | association | intact | EBI-881343  |
| Escherichia coli | association | intact | EBI-892376  |
| Escherichia coli | association | intact | EBI-895127  |
| Escherichia coli | association | intact | EBI-882652  |
| Escherichia coli | association | intact | EBI-882754  |
| Escherichia coli | association | intact | EBI-889451  |
| Escherichia coli | association | intact | EBI-892949  |
| Escherichia coli | association | intact | EBI-886554  |
| Escherichia coli | association | intact | EBI-894458  |
| Escherichia coli | association | intact | EBI-894195  |
| Escherichia coli | association | intact | EBI-894497  |
| Escherichia coli | association | intact | EBI-881132  |
| Escherichia coli | association | intact | EBI-885288  |
| Escherichia coli | association | intact | EBI-892010  |
| Escherichia coli | association | intact | EBI-889536  |
| Escherichia coli | association | intact | EBI-882671  |
| Escherichia coli | association | intact | EBI-890236  |
| Escherichia coli | association | intact | EBI-888473  |
| Escherichia coli | association | intact | EBI-893488  |
| Escherichia coli | association | intact | EBI-884810  |
| Escherichia coli | association | intact | EBI-891136  |
| Escherichia coli | association | intact | EBI-883170  |
| Escherichia coli | association | intact | EBI-883046  |
| Escherichia coli | association | intact | EBI-886257  |
| Escherichia coli | association | intact | EBI-892437  |
| Escherichia coli | association | intact | EBI-885881  |
| Escherichia coli | association | intact | EBI-886442  |
| Escherichia coli | association | intact | EBI-886105  |
| Escherichia coli | association | intact | EBI-890918  |
| Escherichia coli | association | intact | EBI-881988  |
| Escherichia coli | association | intact | EBI-880676  |
| Escherichia coli | association | intact | EBI-886668  |
| Escherichia coli | association | intact | EBI-887918  |
| Escherichia coli | association | intact | EBI-894853  |
| Escherichia coli | association | intact | EBI-889906  |
| Escherichia coli | association | intact | EBI-889827  |
| Escherichia coli | association | intact | EBI-884548  |
| Escherichia coli | association | intact | EBI-891201  |
| Escherichia coli | association | intact | EBI-892692  |
| Escherichia coli | association | intact | EBI-2463360 |
| Escherichia coli | association | intact | EBI-882273  |
| Escherichia coli | association | intact | EBI-889884  |



|                  |                      |        |             |
|------------------|----------------------|--------|-------------|
| Escherichia coli | physical association | intact | EBI-890550  |
| Escherichia coli | association          | intact | EBI-894652  |
| Escherichia coli | association          | intact | EBI-887152  |
| Escherichia coli | association          | intact | EBI-888366  |
| Escherichia coli | association          | intact | EBI-882523  |
| Escherichia coli | association          | intact | EBI-881754  |
| Escherichia coli | association          | intact | EBI-892986  |
| Escherichia coli | association          | intact | EBI-879208  |
| Escherichia coli | association          | intact | EBI-886031  |
| Escherichia coli | association          | intact | EBI-1141630 |
| Escherichia coli | association          | intact | EBI-891424  |
| Escherichia coli | association          | intact | EBI-891722  |
| Escherichia coli | association          | intact | EBI-891354  |
| Escherichia coli | association          | intact | EBI-889283  |
| Escherichia coli | association          | intact | EBI-887431  |
| Escherichia coli | association          | intact | EBI-891787  |
| Escherichia coli | association          | intact | EBI-889915  |
| Escherichia coli | association          | intact | EBI-886162  |
| Escherichia coli | association          | intact | EBI-881946  |
| Escherichia coli | association          | intact | EBI-883980  |
| Escherichia coli | association          | intact | EBI-881486  |
| Escherichia coli | association          | intact | EBI-890702  |
| Escherichia coli | association          | intact | EBI-890751  |
| Escherichia coli | association          | intact | EBI-890903  |
| Escherichia coli | association          | intact | EBI-891956  |
| Escherichia coli | association          | intact | EBI-1146377 |
| Escherichia coli | association          | intact | EBI-1143906 |
| Escherichia coli | association          | intact | EBI-887368  |
| Escherichia coli | association          | intact | EBI-1144856 |
| Escherichia coli | association          | intact | EBI-891214  |
| Escherichia coli | association          | intact | EBI-885243  |
| Escherichia coli | association          | intact | EBI-883484  |
| Escherichia coli | association          | intact | EBI-892823  |
| Escherichia coli | association          | intact | EBI-893067  |
| Escherichia coli | association          | intact | EBI-884491  |
| Escherichia coli | association          | intact | EBI-893445  |
| Escherichia coli | association          | intact | EBI-1144067 |
| Escherichia coli | association          | intact | EBI-895127  |
| Escherichia coli | association          | intact | EBI-882652  |
| Escherichia coli | association          | intact | EBI-894458  |
| Escherichia coli | association          | intact | EBI-892010  |
| Escherichia coli | association          | intact | EBI-893488  |
| Escherichia coli | association          | intact | EBI-891136  |
| Escherichia coli | association          | intact | EBI-883271  |

|                  |                      |        |             |
|------------------|----------------------|--------|-------------|
| Escherichia coli | association          | intact | EBI-882858  |
| Escherichia coli | association          | intact | EBI-886442  |
| Escherichia coli | association          | intact | EBI-1141081 |
| Escherichia coli | association          | intact | EBI-1145639 |
| Escherichia coli | association          | intact | EBI-887918  |
| Escherichia coli | association          | intact | EBI-894853  |
| Escherichia coli | association          | intact | EBI-891845  |
| Escherichia coli | association          | intact | EBI-895036  |
| Escherichia coli | association          | intact | EBI-882058  |
| Escherichia coli | association          | intact | EBI-888366  |
| Escherichia coli | association          | intact | EBI-1135913 |
| Escherichia coli | association          | intact | EBI-1137539 |
| Escherichia coli | physical association | intact | EBI-884687  |
| Escherichia coli | association          | intact | EBI-892986  |
| Escherichia coli | association          | intact | EBI-1140539 |
| Escherichia coli | association          | intact | EBI-893852  |
| Escherichia coli | association          | intact | EBI-1143889 |
| Escherichia coli | association          | intact | EBI-892517  |
| Escherichia coli | physical association | intact | EBI-893060  |

|                  |             |        |            |
|------------------|-------------|--------|------------|
| Escherichia coli | association | intact | EBI-889682 |
| Escherichia coli | association | intact | EBI-885677 |
| Escherichia coli | association | intact | EBI-883980 |
| Escherichia coli | association | intact | EBI-883767 |
| Escherichia coli | association | intact | EBI-883848 |
| Escherichia coli | association | intact | EBI-881486 |
| Escherichia coli | association | intact | EBI-890702 |
| Escherichia coli | association | intact | EBI-890903 |
| Escherichia coli | association | intact | EBI-891956 |
| Escherichia coli | association | intact | EBI-891005 |
| Escherichia coli | association | intact | EBI-886556 |
| Escherichia coli | association | intact | EBI-895331 |
| Escherichia coli | association | intact | EBI-886859 |
| Escherichia coli | association | intact | EBI-892341 |
| Escherichia coli | association | intact | EBI-888757 |
| Escherichia coli | association | intact | EBI-881294 |
| Escherichia coli | association | intact | EBI-893163 |
| Escherichia coli | association | intact | EBI-892532 |
| Escherichia coli | association | intact | EBI-892599 |
| Escherichia coli | association | intact | EBI-881701 |
| Escherichia coli | association | intact | EBI-893117 |
| Escherichia coli | association | intact | EBI-893285 |
| Escherichia coli | association | intact | EBI-887500 |
| Escherichia coli | association | intact | EBI-891798 |
| Escherichia coli | association | intact | EBI-891089 |

|                  |                      |        |             |
|------------------|----------------------|--------|-------------|
| Escherichia coli | association          | intact | EBI-885288  |
| Escherichia coli | association          | intact | EBI-892010  |
| Escherichia coli | association          | intact | EBI-889536  |
| Escherichia coli | association          | intact | EBI-882671  |
| Escherichia coli | association          | intact | EBI-890236  |
| Escherichia coli | association          | intact | EBI-893488  |
| Escherichia coli | association          | intact | EBI-884810  |
| Escherichia coli | association          | intact | EBI-891136  |
| Escherichia coli | association          | intact | EBI-883271  |
| Escherichia coli | association          | intact | EBI-883046  |
| Escherichia coli | association          | intact | EBI-892437  |
| Escherichia coli | association          | intact | EBI-890918  |
| Escherichia coli | association          | intact | EBI-881988  |
| Escherichia coli | association          | intact | EBI-886668  |
| Escherichia coli | association          | intact | EBI-894853  |
| Escherichia coli | association          | intact | EBI-889906  |
| Escherichia coli | association          | intact | EBI-890426  |
| Escherichia coli | association          | intact | EBI-892692  |
| Escherichia coli | association          | intact | EBI-882273  |
| Escherichia coli | association          | intact | EBI-881754  |
| Escherichia coli | association          | intact | EBI-882921  |
| Escherichia coli | association          | intact | EBI-886031  |
| Escherichia coli | association          | intact | EBI-1147580 |
|                  |                      |        |             |
| Escherichia coli | association          | intact | EBI-888757  |
| Escherichia coli | association          | intact | EBI-893285  |
| Escherichia coli | association          | intact | EBI-889536  |
| Escherichia coli | association          | intact | EBI-892437  |
| Escherichia coli | association          | intact | EBI-890918  |
| Escherichia coli | association          | intact | EBI-1147205 |
| Escherichia coli | association          | intact | EBI-887152  |
| Escherichia coli | association          | intact | EBI-1142812 |
|                  |                      |        |             |
| Escherichia coli | association          | intact | EBI-891593  |
| Escherichia coli | association          | intact | EBI-881486  |
| Escherichia coli | physical association | intact | EBI-2370532 |
| Escherichia coli | association          | intact | EBI-1141533 |
| Escherichia coli | association          | intact | EBI-890645  |
| Escherichia coli | association          | intact | EBI-895127  |
| Escherichia coli | association          | intact | EBI-892010  |
| Escherichia coli | association          | intact | EBI-883271  |
| Escherichia coli | association          | intact | EBI-1145639 |
| Escherichia coli | association          | intact | EBI-1137539 |
|                  |                      |        |             |
| Escherichia coli | association          | intact | EBI-1142466 |

|                  |             |        |             |
|------------------|-------------|--------|-------------|
| Escherichia coli | association | intact | EBI-882138  |
| Escherichia coli | association | intact | EBI-1139291 |
| Escherichia coli | association | intact | EBI-888995  |
| Escherichia coli | association | intact | EBI-886162  |
| Escherichia coli | association | intact | EBI-1141251 |
| Escherichia coli | association | intact | EBI-1136440 |
| Escherichia coli | association | intact | EBI-1146601 |
| Escherichia coli | association | intact | EBI-1141216 |
| Escherichia coli | association | intact | EBI-1143934 |
| Escherichia coli | association | intact | EBI-891481  |
| Escherichia coli | association | intact | EBI-881486  |
| Escherichia coli | association | intact | EBI-890702  |
| Escherichia coli | association | intact | EBI-1142607 |
| Escherichia coli | association | intact | EBI-1146919 |
| Escherichia coli | association | intact | EBI-891005  |
| Escherichia coli | association | intact | EBI-1137688 |
| Escherichia coli | association | intact | EBI-1141473 |
| Escherichia coli | association | intact | EBI-1140172 |
| Escherichia coli | association | intact | EBI-1137861 |
| Escherichia coli | association | intact | EBI-886556  |
| Escherichia coli | association | intact | EBI-885437  |
| Escherichia coli | association | intact | EBI-885330  |
| Escherichia coli | association | intact | EBI-885289  |
| Escherichia coli | association | intact | EBI-888700  |
| Escherichia coli | association | intact | EBI-1146654 |
| Escherichia coli | association | intact | EBI-1140208 |
| Escherichia coli | association | intact | EBI-894403  |
| Escherichia coli | association | intact | EBI-888757  |
| Escherichia coli | association | intact | EBI-892932  |
| Escherichia coli | association | intact | EBI-892532  |
| Escherichia coli | association | intact | EBI-1138239 |
| Escherichia coli | association | intact | EBI-1141763 |
| Escherichia coli | association | intact | EBI-889363  |
| Escherichia coli | association | intact | EBI-1137840 |
| Escherichia coli | association | intact | EBI-1137834 |
| Escherichia coli | association | intact | EBI-1137960 |
| Escherichia coli | association | intact | EBI-889983  |
| Escherichia coli | association | intact | EBI-1137964 |
| Escherichia coli | association | intact | EBI-1137983 |
| Escherichia coli | association | intact | EBI-1137885 |
| Escherichia coli | association | intact | EBI-1138694 |
| Escherichia coli | association | intact | EBI-894594  |
| Escherichia coli | association | intact | EBI-1137661 |
| Escherichia coli | association | intact | EBI-892863  |
| Escherichia coli | association | intact | EBI-893916  |

|                  |             |        |             |
|------------------|-------------|--------|-------------|
| Escherichia coli | association | intact | EBI-893067  |
| Escherichia coli | association | intact | EBI-881427  |
| Escherichia coli | association | intact | EBI-1139767 |
| Escherichia coli | association | intact | EBI-1135589 |
| Escherichia coli | association | intact | EBI-893285  |
| Escherichia coli | association | intact | EBI-891798  |
| Escherichia coli | association | intact | EBI-881343  |
| Escherichia coli | association | intact | EBI-892376  |
| Escherichia coli | association | intact | EBI-1143442 |
| Escherichia coli | association | intact | EBI-882754  |
| Escherichia coli | association | intact | EBI-889451  |
| Escherichia coli | association | intact | EBI-889737  |
| Escherichia coli | association | intact | EBI-892949  |
| Escherichia coli | association | intact | EBI-1138014 |
| Escherichia coli | association | intact | EBI-894497  |
| Escherichia coli | association | intact | EBI-892010  |
| Escherichia coli | association | intact | EBI-889536  |
| Escherichia coli | association | intact | EBI-882671  |
| Escherichia coli | association | intact | EBI-849240  |
| Escherichia coli | association | intact | EBI-849464  |
| Escherichia coli | association | intact | EBI-888507  |
| Escherichia coli | association | intact | EBI-883271  |
| Escherichia coli | association | intact | EBI-892741  |
| Escherichia coli | association | intact | EBI-892437  |
| Escherichia coli | association | intact | EBI-1138623 |
| Escherichia coli | association | intact | EBI-890918  |
| Escherichia coli | association | intact | EBI-886668  |
| Escherichia coli | association | intact | EBI-890426  |
| Escherichia coli | association | intact | EBI-889827  |
| Escherichia coli | association | intact | EBI-892692  |
| Escherichia coli | association | intact | EBI-1147205 |
| Escherichia coli | association | intact | EBI-1136521 |
| Escherichia coli | association | intact | EBI-895036  |
| Escherichia coli | association | intact | EBI-2463360 |
| Escherichia coli | association | intact | EBI-1137846 |
| Escherichia coli | association | intact | EBI-884726  |
| Escherichia coli | association | intact | EBI-890566  |
| Escherichia coli | association | intact | EBI-894652  |
| Escherichia coli | association | intact | EBI-1141234 |
| Escherichia coli | association | intact | EBI-887304  |
| Escherichia coli | association | intact | EBI-887152  |
| Escherichia coli | association | intact | EBI-1141802 |
| Escherichia coli | association | intact | EBI-882523  |
| Escherichia coli | association | intact | EBI-1137127 |
| Escherichia coli | association | intact | EBI-882921  |

|                  |             |        |             |
|------------------|-------------|--------|-------------|
| Escherichia coli | association | intact | EBI-1140187 |
| Escherichia coli | association | intact | EBI-1143031 |
| Escherichia coli | association | intact | EBI-893466  |
| Escherichia coli | association | intact | EBI-891722  |
| Escherichia coli | association | intact | EBI-1143894 |
| Escherichia coli | association | intact | EBI-1144453 |
| Escherichia coli | association | intact | EBI-885823  |
| Escherichia coli | association | intact | EBI-1146086 |
| Escherichia coli | association | intact | EBI-887431  |
| Escherichia coli | association | intact | EBI-1146668 |
| Escherichia coli | association | intact | EBI-1147927 |
| Escherichia coli | association | intact | EBI-1135979 |
| Escherichia coli | association | intact | EBI-1136155 |
| Escherichia coli | association | intact | EBI-1139060 |
| Escherichia coli | association | intact | EBI-1142812 |
| Escherichia coli | association | intact | EBI-891065  |
| Escherichia coli | association | intact | EBI-882405  |
| Escherichia coli | association | intact | EBI-882643  |
| Escherichia coli | association | intact | EBI-888995  |
| Escherichia coli | association | intact | EBI-881555  |
| Escherichia coli | association | intact | EBI-885677  |
| Escherichia coli | association | intact | EBI-888051  |
| Escherichia coli | association | intact | EBI-892208  |
| Escherichia coli | association | intact | EBI-891593  |
| Escherichia coli | association | intact | EBI-891673  |
| Escherichia coli | association | intact | EBI-891481  |
| Escherichia coli | association | intact | EBI-883452  |
| Escherichia coli | association | intact | EBI-885165  |
| Escherichia coli | association | intact | EBI-884189  |
| Escherichia coli | association | intact | EBI-879694  |
| Escherichia coli | association | intact | EBI-1146120 |
| Escherichia coli | association | intact | EBI-883908  |
| Escherichia coli | association | intact | EBI-879643  |
| Escherichia coli | association | intact | EBI-883980  |
| Escherichia coli | association | intact | EBI-879539  |
| Escherichia coli | association | intact | EBI-883767  |
| Escherichia coli | association | intact | EBI-879589  |
| Escherichia coli | association | intact | EBI-883848  |
| Escherichia coli | association | intact | EBI-883726  |
| Escherichia coli | association | intact | EBI-884415  |
| Escherichia coli | association | intact | EBI-1136666 |
| Escherichia coli | association | intact | EBI-894157  |
| Escherichia coli | association | intact | EBI-880545  |
| Escherichia coli | association | intact | EBI-881486  |

|                  |                      |        |             |
|------------------|----------------------|--------|-------------|
| Escherichia coli | association          | intact | EBI-890702  |
| Escherichia coli | association          | intact | EBI-1137364 |
| Escherichia coli | association          | intact | EBI-885002  |
| Escherichia coli | association          | intact | EBI-887148  |
| Escherichia coli | association          | intact | EBI-891005  |
| Escherichia coli | association          | intact | EBI-887368  |
| Escherichia coli | association          | intact | EBI-1135340 |
| Escherichia coli | association          | intact | EBI-887657  |
| Escherichia coli | association          | intact | EBI-887624  |
| Escherichia coli | association          | intact | EBI-880595  |
| Escherichia coli | association          | intact | EBI-886556  |
| Escherichia coli | association          | intact | EBI-891254  |
| Escherichia coli | association          | intact | EBI-1145783 |
| Escherichia coli | association          | intact | EBI-880223  |
| Escherichia coli | association          | intact | EBI-880166  |
| Escherichia coli | association          | intact | EBI-885330  |
| Escherichia coli | association          | intact | EBI-880133  |
| Escherichia coli | association          | intact | EBI-888653  |
| Escherichia coli | association          | intact | EBI-886932  |
| Escherichia coli | association          | intact | EBI-880750  |
| Escherichia coli | association          | intact | EBI-886859  |
| Escherichia coli | association          | intact | EBI-879466  |
| Escherichia coli | association          | intact | EBI-883484  |
| Escherichia coli | association          | intact | EBI-894403  |
| Escherichia coli | association          | intact | EBI-889772  |
| Escherichia coli | association          | intact | EBI-888757  |
| Escherichia coli | association          | intact | EBI-882847  |
| Escherichia coli | association          | intact | EBI-889577  |
| Escherichia coli | association          | intact | EBI-892532  |
| Escherichia coli | association          | intact | EBI-892599  |
| Escherichia coli | physical association | intact | EBI-880850  |
| Escherichia coli | association          | intact | EBI-1145248 |
| Escherichia coli | association          | intact | EBI-894976  |
| Escherichia coli | association          | intact | EBI-893751  |
| Escherichia coli | association          | intact | EBI-889622  |
| Escherichia coli | association          | intact | EBI-1142783 |
| Escherichia coli | association          | intact | EBI-893916  |
| Escherichia coli | association          | intact | EBI-1145830 |
| Escherichia coli | association          | intact | EBI-886823  |
| Escherichia coli | association          | intact | EBI-886789  |
| Escherichia coli | association          | intact | EBI-881427  |
| Escherichia coli | association          | intact | EBI-893285  |
| Escherichia coli | association          | intact | EBI-887500  |
| Escherichia coli | association          | intact | EBI-879973  |
| Escherichia coli | association          | intact | EBI-884958  |

|                  |             |        |             |
|------------------|-------------|--------|-------------|
| Escherichia coli | association | intact | EBI-884968  |
| Escherichia coli | association | intact | EBI-891798  |
| Escherichia coli | association | intact | EBI-1136768 |
| Escherichia coli | association | intact | EBI-887767  |
| Escherichia coli | association | intact | EBI-895127  |
| Escherichia coli | association | intact | EBI-886894  |
| Escherichia coli | association | intact | EBI-882652  |
| Escherichia coli | association | intact | EBI-879136  |
| Escherichia coli | association | intact | EBI-892949  |
| Escherichia coli | association | intact | EBI-886554  |
| Escherichia coli | association | intact | EBI-1138014 |
| Escherichia coli | association | intact | EBI-891277  |
| Escherichia coli | association | intact | EBI-894235  |
| Escherichia coli | association | intact | EBI-894195  |
| Escherichia coli | association | intact | EBI-889159  |
| Escherichia coli | association | intact | EBI-894497  |
| Escherichia coli | association | intact | EBI-881132  |
| Escherichia coli | association | intact | EBI-1138445 |
| Escherichia coli | association | intact | EBI-885288  |
| Escherichia coli | association | intact | EBI-892010  |
| Escherichia coli | association | intact | EBI-1143090 |
| Escherichia coli | association | intact | EBI-889536  |
| Escherichia coli | association | intact | EBI-878697  |
| Escherichia coli | association | intact | EBI-882671  |
| Escherichia coli | association | intact | EBI-890236  |
| Escherichia coli | association | intact | EBI-888473  |
| Escherichia coli | association | intact | EBI-893488  |
| Escherichia coli | association | intact | EBI-879914  |
| Escherichia coli | association | intact | EBI-884810  |
| Escherichia coli | association | intact | EBI-891136  |
| Escherichia coli | association | intact | EBI-883997  |
| Escherichia coli | association | intact | EBI-879354  |
| Escherichia coli | association | intact | EBI-879261  |
| Escherichia coli | association | intact | EBI-883046  |
| Escherichia coli | association | intact | EBI-892437  |
| Escherichia coli | association | intact | EBI-885881  |
| Escherichia coli | association | intact | EBI-1144087 |
| Escherichia coli | association | intact | EBI-886442  |
| Escherichia coli | association | intact | EBI-1145382 |
| Escherichia coli | association | intact | EBI-894346  |
| Escherichia coli | association | intact | EBI-1145844 |
| Escherichia coli | association | intact | EBI-890918  |
| Escherichia coli | association | intact | EBI-883733  |
| Escherichia coli | association | intact | EBI-1135713 |
| Escherichia coli | association | intact | EBI-880676  |



|                  |             |        |             |
|------------------|-------------|--------|-------------|
| Escherichia coli | association | intact | EBI-886668  |
| Escherichia coli | association | intact | EBI-887918  |
| Escherichia coli | association | intact | EBI-891845  |
| Escherichia coli | association | intact | EBI-884548  |
| Escherichia coli | association | intact | EBI-1145723 |
| Escherichia coli | association | intact | EBI-892692  |
| Escherichia coli | association | intact | EBI-895036  |
| Escherichia coli | association | intact | EBI-2463360 |
| Escherichia coli | association | intact | EBI-1145396 |
| Escherichia coli | association | intact | EBI-882273  |
| Escherichia coli | association | intact | EBI-894652  |
| Escherichia coli | association | intact | EBI-889746  |
| Escherichia coli | association | intact | EBI-887152  |
| Escherichia coli | association | intact | EBI-880917  |
| Escherichia coli | association | intact | EBI-888366  |
| Escherichia coli | association | intact | EBI-879082  |
| Escherichia coli | association | intact | EBI-1135902 |
| Escherichia coli | association | intact | EBI-878757  |
| Escherichia coli | association | intact | EBI-881754  |
| Escherichia coli | association | intact | EBI-879840  |
| Escherichia coli | association | intact | EBI-892986  |
| Escherichia coli | association | intact | EBI-882921  |
| Escherichia coli | association | intact | EBI-879208  |
| Escherichia coli | association | intact | EBI-886031  |
| Escherichia coli | association | intact | EBI-887757  |
| Escherichia coli | association | intact | EBI-893218  |
| Escherichia coli | association | intact | EBI-887063  |
| Escherichia coli | association | intact | EBI-879491  |
| Escherichia coli | association | intact | EBI-891424  |
| Escherichia coli | association | intact | EBI-891722  |
| Escherichia coli | association | intact | EBI-893852  |
| Escherichia coli | association | intact | EBI-891354  |
| Escherichia coli | association | intact | EBI-881886  |
| Escherichia coli | association | intact | EBI-1145719 |
| Escherichia coli | association | intact | EBI-1146034 |
| Escherichia coli | association | intact | EBI-887431  |
| Escherichia coli | association | intact | EBI-890038  |
| Escherichia coli | association | intact | EBI-1147709 |
| Escherichia coli | association | intact | EBI-1140044 |
|                  |             |        |             |
| Escherichia coli | association | intact | EBI-1137834 |
| Escherichia coli | association | intact | EBI-1135304 |
| Escherichia coli | association | intact | EBI-1144453 |

|                  |             |        |             |
|------------------|-------------|--------|-------------|
| Escherichia coli | association | intact | EBI-1139060 |
| Escherichia coli | association | intact | EBI-890114  |
| Escherichia coli | association | intact | EBI-886162  |
| Escherichia coli | association | intact | EBI-892312  |
| Escherichia coli | association | intact | EBI-891593  |
| Escherichia coli | association | intact | EBI-891481  |
| Escherichia coli | association | intact | EBI-891405  |
| Escherichia coli | association | intact | EBI-890853  |
| Escherichia coli | association | intact | EBI-887368  |
| Escherichia coli | association | intact | EBI-888219  |
| Escherichia coli | association | intact | EBI-892795  |
| Escherichia coli | association | intact | EBI-885490  |
| Escherichia coli | association | intact | EBI-885330  |
| Escherichia coli | association | intact | EBI-894305  |
| Escherichia coli | association | intact | EBI-886859  |
| Escherichia coli | association | intact | EBI-894374  |
| Escherichia coli | association | intact | EBI-883484  |
| Escherichia coli | association | intact | EBI-889772  |
| Escherichia coli | association | intact | EBI-888757  |
| Escherichia coli | association | intact | EBI-883387  |
| Escherichia coli | association | intact | EBI-892532  |
| Escherichia coli | association | intact | EBI-892599  |
| Escherichia coli | association | intact | EBI-894976  |
| Escherichia coli | association | intact | EBI-881701  |
| Escherichia coli | association | intact | EBI-890645  |
| Escherichia coli | association | intact | EBI-893285  |
| Escherichia coli | association | intact | EBI-891798  |
| Escherichia coli | association | intact | EBI-881343  |
| Escherichia coli | association | intact | EBI-895127  |
| Escherichia coli | association | intact | EBI-882652  |
| Escherichia coli | association | intact | EBI-894195  |
| Escherichia coli | association | intact | EBI-894497  |
| Escherichia coli | association | intact | EBI-891872  |
| Escherichia coli | association | intact | EBI-883271  |
| Escherichia coli | association | intact | EBI-883170  |
| Escherichia coli | association | intact | EBI-886442  |
| Escherichia coli | association | intact | EBI-887918  |
| Escherichia coli | association | intact | EBI-881754  |
| Escherichia coli | association | intact | EBI-882921  |
| Escherichia coli | association | intact | EBI-886031  |
| Escherichia coli | association | intact | EBI-891354  |
| Escherichia coli | association | intact | EBI-1144775 |
| Escherichia coli | association | intact | EBI-891787  |

|                  |                      |        |             |
|------------------|----------------------|--------|-------------|
| Escherichia coli | association          | intact | EBI-1143271 |
| Escherichia coli | association          | intact | EBI-1147492 |
| Escherichia coli | association          | intact | EBI-1142821 |
| Escherichia coli | association          | intact | EBI-886162  |
| Escherichia coli | association          | intact | EBI-1137163 |
| Escherichia coli | association          | intact | EBI-885677  |
| Escherichia coli | association          | intact | EBI-1138573 |
| Escherichia coli | association          | intact | EBI-1141181 |
| Escherichia coli | association          | intact | EBI-891593  |
| Escherichia coli | association          | intact | EBI-891481  |
| Escherichia coli | physical association | intact | EBI-879419  |
| Escherichia coli | association          | intact | EBI-879694  |
| Escherichia coli | association          | intact | EBI-1140146 |
| Escherichia coli | association          | intact | EBI-883980  |
| Escherichia coli | association          | intact | EBI-1140933 |
| Escherichia coli | association          | intact | EBI-883848  |
| Escherichia coli | association          | intact | EBI-1137461 |
| Escherichia coli | association          | intact | EBI-1138538 |
| Escherichia coli | association          | intact | EBI-1140130 |
| Escherichia coli | association          | intact | EBI-1142744 |
| Escherichia coli | association          | intact | EBI-1145762 |
| Escherichia coli | association          | intact | EBI-1147250 |
| Escherichia coli | association          | intact | EBI-880564  |
| Escherichia coli | association          | intact | EBI-880545  |
| Escherichia coli | association          | intact | EBI-881486  |
| Escherichia coli | physical association | intact | EBI-880244  |
| Escherichia coli | association          | intact | EBI-878632  |
| Escherichia coli | association          | intact | EBI-1145744 |
| Escherichia coli | association          | intact | EBI-883418  |
| Escherichia coli | association          | intact | EBI-890751  |
| Escherichia coli | association          | intact | EBI-890853  |
| Escherichia coli | association          | intact | EBI-1142833 |
| Escherichia coli | association          | intact | EBI-1142893 |
| Escherichia coli | association          | intact | EBI-1142885 |
| Escherichia coli | association          | intact | EBI-1142911 |
| Escherichia coli | association          | intact | EBI-887148  |
| Escherichia coli | association          | intact | EBI-887368  |
| Escherichia coli | association          | intact | EBI-1141425 |
| Escherichia coli | association          | intact | EBI-1141372 |
| Escherichia coli | association          | intact | EBI-1145369 |
| Escherichia coli | association          | intact | EBI-894532  |
| Escherichia coli | association          | intact | EBI-1143352 |
| Escherichia coli | association          | intact | EBI-883047  |

|                  |             |        |             |
|------------------|-------------|--------|-------------|
| Escherichia coli | association | intact | EBI-888219  |
| Escherichia coli | association | intact | EBI-887624  |
| Escherichia coli | association | intact | EBI-880595  |
| Escherichia coli | association | intact | EBI-886556  |
| Escherichia coli | association | intact | EBI-880166  |
| Escherichia coli | association | intact | EBI-885330  |
| Escherichia coli | association | intact | EBI-1145795 |
| Escherichia coli | association | intact | EBI-886932  |
| Escherichia coli | association | intact | EBI-880750  |
| Escherichia coli | association | intact | EBI-886859  |
| Escherichia coli | association | intact | EBI-892341  |
| Escherichia coli | association | intact | EBI-883484  |
| Escherichia coli | association | intact | EBI-1137105 |
| Escherichia coli | association | intact | EBI-889390  |
| Escherichia coli | association | intact | EBI-894403  |
| Escherichia coli | association | intact | EBI-1143113 |
| Escherichia coli | association | intact | EBI-892784  |
| Escherichia coli | association | intact | EBI-1146265 |
| Escherichia coli | association | intact | EBI-888757  |
| Escherichia coli | association | intact | EBI-888863  |
| Escherichia coli | association | intact | EBI-893163  |
| Escherichia coli | association | intact | EBI-892599  |
| Escherichia coli | association | intact | EBI-886059  |
| Escherichia coli | association | intact | EBI-1135798 |
| Escherichia coli | association | intact | EBI-1137052 |
| Escherichia coli | association | intact | EBI-1137637 |
| Escherichia coli | association | intact | EBI-894976  |
| Escherichia coli | association | intact | EBI-1144720 |
| Escherichia coli | association | intact | EBI-889622  |
| Escherichia coli | association | intact | EBI-894012  |
| Escherichia coli | association | intact | EBI-1142783 |
| Escherichia coli | association | intact | EBI-893916  |
| Escherichia coli | association | intact | EBI-1143718 |
| Escherichia coli | association | intact | EBI-1142433 |
| Escherichia coli | association | intact | EBI-886823  |
| Escherichia coli | association | intact | EBI-893067  |
| Escherichia coli | association | intact | EBI-1141994 |
| Escherichia coli | association | intact | EBI-890620  |
| Escherichia coli | association | intact | EBI-893285  |
| Escherichia coli | association | intact | EBI-887500  |
| Escherichia coli | association | intact | EBI-879973  |
| Escherichia coli | association | intact | EBI-884968  |
| Escherichia coli | association | intact | EBI-891089  |
| Escherichia coli | association | intact | EBI-883913  |
| Escherichia coli | association | intact | EBI-884491  |

|                  |             |        |             |
|------------------|-------------|--------|-------------|
| Escherichia coli | association | intact | EBI-881343  |
| Escherichia coli | association | intact | EBI-895127  |
| Escherichia coli | association | intact | EBI-1146638 |
| Escherichia coli | association | intact | EBI-882652  |
| Escherichia coli | association | intact | EBI-1146417 |
| Escherichia coli | association | intact | EBI-889451  |
| Escherichia coli | association | intact | EBI-1143946 |
| Escherichia coli | association | intact | EBI-1146962 |
| Escherichia coli | association | intact | EBI-1138014 |
| Escherichia coli | association | intact | EBI-891277  |
| Escherichia coli | association | intact | EBI-894235  |
| Escherichia coli | association | intact | EBI-1135327 |
| Escherichia coli | association | intact | EBI-1142059 |
| Escherichia coli | association | intact | EBI-894195  |
| Escherichia coli | association | intact | EBI-881132  |
| Escherichia coli | association | intact | EBI-1144013 |
| Escherichia coli | association | intact | EBI-885288  |
| Escherichia coli | association | intact | EBI-892010  |
| Escherichia coli | association | intact | EBI-878697  |
| Escherichia coli | association | intact | EBI-1139392 |
| Escherichia coli | association | intact | EBI-882671  |
| Escherichia coli | association | intact | EBI-890236  |
| Escherichia coli | association | intact | EBI-888473  |
| Escherichia coli | association | intact | EBI-893488  |
| Escherichia coli | association | intact | EBI-884810  |
| Escherichia coli | association | intact | EBI-891136  |
| Escherichia coli | association | intact | EBI-883997  |
| Escherichia coli | association | intact | EBI-879354  |
| Escherichia coli | association | intact | EBI-883271  |
| Escherichia coli | association | intact | EBI-883170  |
| Escherichia coli | association | intact | EBI-879261  |
| Escherichia coli | association | intact | EBI-886257  |
| Escherichia coli | association | intact | EBI-892741  |
| Escherichia coli | association | intact | EBI-1144702 |
| Escherichia coli | association | intact | EBI-892437  |
| Escherichia coli | association | intact | EBI-885881  |
| Escherichia coli | association | intact | EBI-886442  |
| Escherichia coli | association | intact | EBI-1145382 |
| Escherichia coli | association | intact | EBI-1147905 |
| Escherichia coli | association | intact | EBI-1141330 |
| Escherichia coli | association | intact | EBI-886105  |
| Escherichia coli | association | intact | EBI-890918  |
| Escherichia coli | association | intact | EBI-880676  |
| Escherichia coli | association | intact | EBI-886668  |
| Escherichia coli | association | intact | EBI-887918  |

|                  |             |        |             |
|------------------|-------------|--------|-------------|
| Escherichia coli | association | intact | EBI-894853  |
| Escherichia coli | association | intact | EBI-889906  |
| Escherichia coli | association | intact | EBI-884360  |
| Escherichia coli | association | intact | EBI-1143175 |
| Escherichia coli | association | intact | EBI-1142723 |
| Escherichia coli | association | intact | EBI-889827  |
| Escherichia coli | association | intact | EBI-891845  |
| Escherichia coli | association | intact | EBI-892692  |
| Escherichia coli | association | intact | EBI-895036  |
| Escherichia coli | association | intact | EBI-2463360 |
| Escherichia coli | association | intact | EBI-1147737 |
| Escherichia coli | association | intact | EBI-882273  |
| Escherichia coli | association | intact | EBI-1139361 |
| Escherichia coli | association | intact | EBI-1138496 |
| Escherichia coli | association | intact | EBI-894652  |
| Escherichia coli | association | intact | EBI-1139703 |
| Escherichia coli | association | intact | EBI-887152  |
| Escherichia coli | association | intact | EBI-1144149 |
| Escherichia coli | association | intact | EBI-879082  |
| Escherichia coli | association | intact | EBI-1135902 |
| Escherichia coli | association | intact | EBI-1136740 |
| Escherichia coli | association | intact | EBI-881754  |
| Escherichia coli | association | intact | EBI-893410  |
| Escherichia coli | association | intact | EBI-892986  |
| Escherichia coli | association | intact | EBI-882921  |
| Escherichia coli | association | intact | EBI-879208  |
| Escherichia coli | association | intact | EBI-1139235 |
| Escherichia coli | association | intact | EBI-1139450 |
| Escherichia coli | association | intact | EBI-1140990 |
| Escherichia coli | association | intact | EBI-1140995 |
| Escherichia coli | association | intact | EBI-1141281 |
| Escherichia coli | association | intact | EBI-1141862 |
| Escherichia coli | association | intact | EBI-1142588 |
| Escherichia coli | association | intact | EBI-1142644 |
| Escherichia coli | association | intact | EBI-1142806 |
| Escherichia coli | association | intact | EBI-1142963 |
| Escherichia coli | association | intact | EBI-1143243 |
| Escherichia coli | association | intact | EBI-1143500 |
| Escherichia coli | association | intact | EBI-1143850 |
| Escherichia coli | association | intact | EBI-891354  |
| Escherichia coli | association | intact | EBI-1144039 |
| Escherichia coli | association | intact | EBI-1144619 |
| Escherichia coli | association | intact | EBI-1144822 |
| Escherichia coli | association | intact | EBI-1144937 |
| Escherichia coli | association | intact | EBI-881886  |

|                  |             |        |             |
|------------------|-------------|--------|-------------|
| Escherichia coli | association | intact | EBI-1145908 |
| Escherichia coli | association | intact | EBI-1146034 |
| Escherichia coli | association | intact | EBI-890038  |
| Escherichia coli | association | intact | EBI-1147040 |
| Escherichia coli | association | intact | EBI-1147332 |
| Escherichia coli | association | intact | EBI-1147381 |
| Escherichia coli | association | intact | EBI-1139043 |
| Escherichia coli | association | intact | EBI-1140044 |
| Escherichia coli | association | intact | EBI-1140972 |
| Escherichia coli | association | intact | EBI-1142009 |
| Escherichia coli | association | intact | EBI-884929  |
| Escherichia coli | association | intact | EBI-1141067 |

|                  |             |        |             |
|------------------|-------------|--------|-------------|
| Escherichia coli | association | intact | EBI-1146605 |
| Escherichia coli | association | intact | EBI-1140568 |
| Escherichia coli | association | intact | EBI-885677  |
| Escherichia coli | association | intact | EBI-884758  |
| Escherichia coli | association | intact | EBI-884584  |
| Escherichia coli | association | intact | EBI-879643  |
| Escherichia coli | association | intact | EBI-883980  |
| Escherichia coli | association | intact | EBI-1140853 |
| Escherichia coli | association | intact | EBI-887148  |
| Escherichia coli | association | intact | EBI-1146889 |
| Escherichia coli | association | intact | EBI-1147818 |
| Escherichia coli | association | intact | EBI-889279  |
| Escherichia coli | association | intact | EBI-1147535 |
| Escherichia coli | association | intact | EBI-883047  |
| Escherichia coli | association | intact | EBI-1143130 |
| Escherichia coli | association | intact | EBI-879466  |
| Escherichia coli | association | intact | EBI-883484  |
| Escherichia coli | association | intact | EBI-888757  |
| Escherichia coli | association | intact | EBI-883387  |
| Escherichia coli | association | intact | EBI-882847  |
| Escherichia coli | association | intact | EBI-1139075 |
| Escherichia coli | association | intact | EBI-1139067 |
| Escherichia coli | association | intact | EBI-888239  |
| Escherichia coli | association | intact | EBI-1143635 |
| Escherichia coli | association | intact | EBI-1145014 |
| Escherichia coli | association | intact | EBI-886705  |
| Escherichia coli | association | intact | EBI-1145063 |
| Escherichia coli | association | intact | EBI-893285  |
| Escherichia coli | association | intact | EBI-887500  |
| Escherichia coli | association | intact | EBI-883913  |
| Escherichia coli | association | intact | EBI-1142065 |
| Escherichia coli | association | intact | EBI-1142093 |

|                  |             |        |             |
|------------------|-------------|--------|-------------|
| Escherichia coli | association | intact | EBI-1140650 |
| Escherichia coli | association | intact | EBI-895127  |
| Escherichia coli | association | intact | EBI-882652  |
| Escherichia coli | association | intact | EBI-882754  |
| Escherichia coli | association | intact | EBI-1146962 |
| Escherichia coli | association | intact | EBI-894235  |
| Escherichia coli | association | intact | EBI-885288  |
| Escherichia coli | association | intact | EBI-892010  |
| Escherichia coli | association | intact | EBI-878697  |
| Escherichia coli | association | intact | EBI-882671  |
| Escherichia coli | association | intact | EBI-879354  |
| Escherichia coli | association | intact | EBI-1144702 |
| Escherichia coli | association | intact | EBI-885881  |
| Escherichia coli | association | intact | EBI-881988  |
| Escherichia coli | association | intact | EBI-1145639 |
| Escherichia coli | association | intact | EBI-887918  |
| Escherichia coli | association | intact | EBI-1145192 |
| Escherichia coli | association | intact | EBI-2463360 |
| Escherichia coli | association | intact | EBI-882273  |
| Escherichia coli | association | intact | EBI-1139703 |
| Escherichia coli | association | intact | EBI-882921  |
| Escherichia coli | association | intact | EBI-879208  |
| Escherichia coli | association | intact | EBI-1138811 |
| Escherichia coli | association | intact | EBI-1139089 |
| Escherichia coli | association | intact | EBI-1139143 |
| Escherichia coli | association | intact | EBI-1139235 |
| Escherichia coli | association | intact | EBI-1140446 |
| Escherichia coli | association | intact | EBI-1140602 |
| Escherichia coli | association | intact | EBI-1142519 |
| Escherichia coli | association | intact | EBI-1142625 |
| Escherichia coli | association | intact | EBI-1145259 |
| Escherichia coli | association | intact | EBI-1147332 |
| Escherichia coli | association | intact | EBI-1139043 |
| Escherichia coli | association | intact | EBI-1143271 |
| Escherichia coli | association | intact | EBI-1146605 |
| Escherichia coli | association | intact | EBI-1141998 |
| Escherichia coli | association | intact | EBI-885677  |
| Escherichia coli | association | intact | EBI-881486  |
| Escherichia coli | association | intact | EBI-1140853 |
| Escherichia coli | association | intact | EBI-883577  |
| Escherichia coli | association | intact | EBI-1137295 |
| Escherichia coli | association | intact | EBI-1142879 |
| Escherichia coli | association | intact | EBI-887148  |
| Escherichia coli | association | intact | EBI-1146889 |



|                  |                      |        |             |
|------------------|----------------------|--------|-------------|
| Escherichia coli | association          | intact | EBI-1147818 |
| Escherichia coli | association          | intact | EBI-1141461 |
| Escherichia coli | association          | intact | EBI-1146778 |
| Escherichia coli | physical association | intact | EBI-1146050 |
| Escherichia coli | association          | intact | EBI-1142297 |
| Escherichia coli | association          | intact | EBI-1147071 |
| Escherichia coli | association          | intact | EBI-1143130 |
| Escherichia coli | association          | intact | EBI-1137559 |
| Escherichia coli | association          | intact | EBI-888757  |
| Escherichia coli | association          | intact | EBI-892532  |
| Escherichia coli | association          | intact | EBI-1135819 |
| Escherichia coli | association          | intact | EBI-1139067 |
| Escherichia coli | association          | intact | EBI-1137971 |
| Escherichia coli | association          | intact | EBI-1144107 |
| Escherichia coli | association          | intact | EBI-1142937 |
| Escherichia coli | association          | intact | EBI-1145014 |
| Escherichia coli | association          | intact | EBI-1147923 |
| Escherichia coli | association          | intact | EBI-893285  |
| Escherichia coli | association          | intact | EBI-887500  |
| Escherichia coli | association          | intact | EBI-1138966 |
| Escherichia coli | association          | intact | EBI-891798  |
| Escherichia coli | association          | intact | EBI-883913  |
| Escherichia coli | association          | intact | EBI-1136768 |
| Escherichia coli | association          | intact | EBI-1142065 |
| Escherichia coli | association          | intact | EBI-1142480 |
| Escherichia coli | association          | intact | EBI-1142093 |
| Escherichia coli | association          | intact | EBI-894497  |
| Escherichia coli | association          | intact | EBI-892010  |
| Escherichia coli | association          | intact | EBI-878697  |
| Escherichia coli | association          | intact | EBI-882671  |
| Escherichia coli | association          | intact | EBI-890236  |
| Escherichia coli | association          | intact | EBI-884810  |
| Escherichia coli | association          | intact | EBI-883997  |
| Escherichia coli | association          | intact | EBI-1142406 |
| Escherichia coli | association          | intact | EBI-1145418 |
| Escherichia coli | association          | intact | EBI-892437  |
| Escherichia coli | association          | intact | EBI-885881  |
| Escherichia coli | association          | intact | EBI-1145639 |
| Escherichia coli | association          | intact | EBI-1145192 |
| Escherichia coli | association          | intact | EBI-890426  |
| Escherichia coli | association          | intact | EBI-882920  |
| Escherichia coli | association          | intact | EBI-889827  |
| Escherichia coli | association          | intact | EBI-1136591 |
| Escherichia coli | association          | intact | EBI-2463360 |
| Escherichia coli | association          | intact | EBI-882273  |

|                  |             |        |             |
|------------------|-------------|--------|-------------|
| Escherichia coli | association | intact | EBI-1139361 |
| Escherichia coli | association | intact | EBI-1141792 |
| Escherichia coli | association | intact | EBI-881754  |
| Escherichia coli | association | intact | EBI-882921  |
| Escherichia coli | association | intact | EBI-879208  |
| Escherichia coli | association | intact | EBI-1138811 |
| Escherichia coli | association | intact | EBI-1139089 |
| Escherichia coli | association | intact | EBI-1139033 |
| Escherichia coli | association | intact | EBI-1139674 |
| Escherichia coli | association | intact | EBI-1140446 |
| Escherichia coli | association | intact | EBI-1140995 |
| Escherichia coli | association | intact | EBI-1141281 |
| Escherichia coli | association | intact | EBI-1142273 |
| Escherichia coli | association | intact | EBI-1142494 |
| Escherichia coli | association | intact | EBI-1142519 |
| Escherichia coli | association | intact | EBI-1142644 |
| Escherichia coli | association | intact | EBI-879491  |
| Escherichia coli | association | intact | EBI-1143500 |
| Escherichia coli | association | intact | EBI-1144435 |
| Escherichia coli | association | intact | EBI-1146826 |
| Escherichia coli | association | intact | EBI-1147040 |
| Escherichia coli | association | intact | EBI-1139043 |
| Escherichia coli | association | intact | EBI-1140958 |
| Escherichia coli | association | intact | EBI-1143583 |

|                  |                      |        |            |
|------------------|----------------------|--------|------------|
| Escherichia coli | association          | intact | EBI-886162 |
| Escherichia coli | association          | intact | EBI-892312 |
| Escherichia coli | association          | intact | EBI-891593 |
| Escherichia coli | association          | intact | EBI-891481 |
| Escherichia coli | association          | intact | EBI-891405 |
| Escherichia coli | association          | intact | EBI-883452 |
| Escherichia coli | physical association | intact | EBI-891949 |
| Escherichia coli | association          | intact | EBI-884189 |
| Escherichia coli | association          | intact | EBI-883908 |
| Escherichia coli | association          | intact | EBI-883726 |
| Escherichia coli | association          | intact | EBI-890702 |
| Escherichia coli | association          | intact | EBI-890751 |
| Escherichia coli | association          | intact | EBI-890990 |
| Escherichia coli | association          | intact | EBI-888109 |
| Escherichia coli | association          | intact | EBI-894532 |
| Escherichia coli | association          | intact | EBI-885867 |
| Escherichia coli | association          | intact | EBI-891983 |
| Escherichia coli | association          | intact | EBI-893878 |
| Escherichia coli | association          | intact | EBI-888219 |
| Escherichia coli | association          | intact | EBI-892795 |

|                  |                      |        |            |
|------------------|----------------------|--------|------------|
| Escherichia coli | association          | intact | EBI-887624 |
| Escherichia coli | association          | intact | EBI-886556 |
| Escherichia coli | association          | intact | EBI-885490 |
| Escherichia coli | association          | intact | EBI-885330 |
| Escherichia coli | association          | intact | EBI-885289 |
| Escherichia coli | association          | intact | EBI-885243 |
| Escherichia coli | association          | intact | EBI-891778 |
| Escherichia coli | association          | intact | EBI-882104 |
| Escherichia coli | association          | intact | EBI-894305 |
| Escherichia coli | association          | intact | EBI-886932 |
| Escherichia coli | association          | intact | EBI-886859 |
| Escherichia coli | association          | intact | EBI-886364 |
| Escherichia coli | association          | intact | EBI-889772 |
| Escherichia coli | association          | intact | EBI-892784 |
| Escherichia coli | physical association | intact | EBI-893039 |
| Escherichia coli | association          | intact | EBI-888757 |
| Escherichia coli | association          | intact | EBI-888863 |
| Escherichia coli | association          | intact | EBI-883387 |
| Escherichia coli | association          | intact | EBI-894148 |
| Escherichia coli | association          | intact | EBI-888472 |
| Escherichia coli | association          | intact | EBI-892532 |
| Escherichia coli | association          | intact | EBI-892599 |
| Escherichia coli | association          | intact | EBI-889363 |
| Escherichia coli | association          | intact | EBI-887041 |
| Escherichia coli | physical association | intact | EBI-889969 |
| Escherichia coli | association          | intact | EBI-894594 |
| Escherichia coli | association          | intact | EBI-894012 |
| Escherichia coli | association          | intact | EBI-894052 |
| Escherichia coli | association          | intact | EBI-881701 |
| Escherichia coli | association          | intact | EBI-893999 |
| Escherichia coli | association          | intact | EBI-885776 |
| Escherichia coli | association          | intact | EBI-893916 |
| Escherichia coli | physical association | intact | EBI-890976 |
| Escherichia coli | association          | intact | EBI-892247 |
| Escherichia coli | association          | intact | EBI-893067 |
| Escherichia coli | association          | intact | EBI-889421 |
| Escherichia coli | association          | intact | EBI-890645 |
| Escherichia coli | association          | intact | EBI-893285 |
| Escherichia coli | association          | intact | EBI-891798 |
| Escherichia coli | association          | intact | EBI-884491 |
| Escherichia coli | association          | intact | EBI-890837 |
| Escherichia coli | association          | intact | EBI-893445 |
| Escherichia coli | association          | intact | EBI-881343 |
| Escherichia coli | association          | intact | EBI-895127 |
| Escherichia coli | association          | intact | EBI-892291 |

|                  |                      |        |             |
|------------------|----------------------|--------|-------------|
| Escherichia coli | association          | intact | EBI-887499  |
| Escherichia coli | association          | intact | EBI-881973  |
| Escherichia coli | association          | intact | EBI-891277  |
| Escherichia coli | association          | intact | EBI-892010  |
| Escherichia coli | association          | intact | EBI-890236  |
| Escherichia coli | association          | intact | EBI-893488  |
| Escherichia coli | association          | intact | EBI-884810  |
| Escherichia coli | association          | intact | EBI-891872  |
| Escherichia coli | association          | intact | EBI-883271  |
| Escherichia coli | association          | intact | EBI-883170  |
| Escherichia coli | association          | intact | EBI-892741  |
| Escherichia coli | association          | intact | EBI-882858  |
| Escherichia coli | association          | intact | EBI-886442  |
| Escherichia coli | association          | intact | EBI-894346  |
| Escherichia coli | association          | intact | EBI-1144410 |
| Escherichia coli | association          | intact | EBI-886105  |
| Escherichia coli | association          | intact | EBI-890918  |
| Escherichia coli | association          | intact | EBI-886668  |
| Escherichia coli | association          | intact | EBI-894853  |
| Escherichia coli | association          | intact | EBI-891312  |
| Escherichia coli | association          | intact | EBI-891845  |
| Escherichia coli | association          | intact | EBI-892692  |
| Escherichia coli | association          | intact | EBI-2463360 |
| Escherichia coli | association          | intact | EBI-882459  |
| Escherichia coli | association          | intact | EBI-893805  |
| Escherichia coli | association          | intact | EBI-894652  |
| Escherichia coli | association          | intact | EBI-884632  |
| Escherichia coli | association          | intact | EBI-882058  |
| Escherichia coli | association          | intact | EBI-888366  |
| Escherichia coli | association          | intact | EBI-887064  |
| Escherichia coli | association          | intact | EBI-892187  |
| Escherichia coli | association          | intact | EBI-892264  |
| Escherichia coli | association          | intact | EBI-881754  |
| Escherichia coli | association          | intact | EBI-893410  |
| Escherichia coli | association          | intact | EBI-882921  |
| Escherichia coli | physical association | intact | EBI-894298  |
| Escherichia coli | association          | intact | EBI-890383  |
| Escherichia coli | association          | intact | EBI-889250  |
| Escherichia coli | association          | intact | EBI-886031  |
| Escherichia coli | association          | intact | EBI-884468  |
| Escherichia coli | association          | intact | EBI-1142416 |
| Escherichia coli | association          | intact | EBI-893466  |
| Escherichia coli | association          | intact | EBI-893852  |
| Escherichia coli | association          | intact | EBI-887888  |
| Escherichia coli | association          | intact | EBI-891042  |

|                  |                      |        |             |
|------------------|----------------------|--------|-------------|
| Escherichia coli | association          | intact | EBI-891787  |
| Escherichia coli | association          | intact | EBI-886162  |
| Escherichia coli | physical association | intact | EBI-1212150 |
| Escherichia coli | association          | intact | EBI-885677  |
| Escherichia coli | association          | intact | EBI-891593  |
| Escherichia coli | association          | intact | EBI-883980  |
| Escherichia coli | association          | intact | EBI-1136666 |
| Escherichia coli | association          | intact | EBI-888958  |
| Escherichia coli | association          | intact | EBI-881486  |
| Escherichia coli | association          | intact | EBI-890853  |
| Escherichia coli | association          | intact | EBI-1143906 |
| Escherichia coli | association          | intact | EBI-887148  |
| Escherichia coli | association          | intact | EBI-1145369 |
| Escherichia coli | association          | intact | EBI-886556  |
| Escherichia coli | association          | intact | EBI-884859  |
| Escherichia coli | association          | intact | EBI-888700  |
| Escherichia coli | association          | intact | EBI-880750  |
| Escherichia coli | association          | intact | EBI-887783  |
| Escherichia coli | association          | intact | EBI-894403  |
| Escherichia coli | association          | intact | EBI-888757  |
| Escherichia coli | association          | intact | EBI-893163  |
| Escherichia coli | association          | intact | EBI-889577  |
| Escherichia coli | association          | intact | EBI-894571  |
| Escherichia coli | association          | intact | EBI-892599  |
| Escherichia coli | association          | intact | EBI-886059  |
| Escherichia coli | association          | intact | EBI-1138378 |
| Escherichia coli | association          | intact | EBI-890008  |
| Escherichia coli | association          | intact | EBI-893285  |
| Escherichia coli | association          | intact | EBI-887500  |
| Escherichia coli | association          | intact | EBI-1137743 |
| Escherichia coli | association          | intact | EBI-884958  |
| Escherichia coli | association          | intact | EBI-891798  |
| Escherichia coli | association          | intact | EBI-891089  |
| Escherichia coli | association          | intact | EBI-883913  |
| Escherichia coli | association          | intact | EBI-895127  |
| Escherichia coli | association          | intact | EBI-882754  |
| Escherichia coli | association          | intact | EBI-886554  |
| Escherichia coli | association          | intact | EBI-894497  |
| Escherichia coli | association          | intact | EBI-885288  |
| Escherichia coli | association          | intact | EBI-892010  |
| Escherichia coli | association          | intact | EBI-889536  |
| Escherichia coli | association          | intact | EBI-878697  |
| Escherichia coli | association          | intact | EBI-882671  |
| Escherichia coli | association          | intact | EBI-890236  |

|                  |             |        |             |
|------------------|-------------|--------|-------------|
| Escherichia coli | association | intact | EBI-888473  |
| Escherichia coli | association | intact | EBI-849464  |
| Escherichia coli | association | intact | EBI-884810  |
| Escherichia coli | association | intact | EBI-891136  |
| Escherichia coli | association | intact | EBI-883997  |
| Escherichia coli | association | intact | EBI-883046  |
| Escherichia coli | association | intact | EBI-892437  |
| Escherichia coli | association | intact | EBI-885881  |
| Escherichia coli | association | intact | EBI-890918  |
| Escherichia coli | association | intact | EBI-881988  |
| Escherichia coli | association | intact | EBI-886668  |
| Escherichia coli | association | intact | EBI-891549  |
| Escherichia coli | association | intact | EBI-884548  |
| Escherichia coli | association | intact | EBI-886205  |
| Escherichia coli | association | intact | EBI-892692  |
| Escherichia coli | association | intact | EBI-882273  |
| Escherichia coli | association | intact | EBI-887152  |
| Escherichia coli | association | intact | EBI-878757  |
| Escherichia coli | association | intact | EBI-881754  |
| Escherichia coli | association | intact | EBI-882921  |
| Escherichia coli | association | intact | EBI-886031  |
| Escherichia coli | association | intact | EBI-879491  |
| Escherichia coli | association | intact | EBI-1146016 |

|                  |             |        |             |
|------------------|-------------|--------|-------------|
| Escherichia coli | association | intact | EBI-1147722 |
| Escherichia coli | association | intact | EBI-1140631 |
| Escherichia coli | association | intact | EBI-879694  |
| Escherichia coli | association | intact | EBI-879643  |
| Escherichia coli | association | intact | EBI-879539  |
| Escherichia coli | association | intact | EBI-879589  |
| Escherichia coli | association | intact | EBI-888958  |
| Escherichia coli | association | intact | EBI-887392  |
| Escherichia coli | association | intact | EBI-880595  |
| Escherichia coli | association | intact | EBI-1135798 |
| Escherichia coli | association | intact | EBI-892424  |
| Escherichia coli | association | intact | EBI-887500  |
| Escherichia coli | association | intact | EBI-887767  |
| Escherichia coli | association | intact | EBI-885288  |
| Escherichia coli | association | intact | EBI-878697  |
| Escherichia coli | association | intact | EBI-882671  |
| Escherichia coli | association | intact | EBI-890236  |
| Escherichia coli | association | intact | EBI-888473  |
| Escherichia coli | association | intact | EBI-879914  |

|                  |             |        |             |
|------------------|-------------|--------|-------------|
| Escherichia coli | association | intact | EBI-883997  |
| Escherichia coli | association | intact | EBI-885881  |
| Escherichia coli | association | intact | EBI-889906  |
| Escherichia coli | association | intact | EBI-886205  |
| Escherichia coli | association | intact | EBI-882273  |
| Escherichia coli | association | intact | EBI-878757  |
| Escherichia coli | association | intact | EBI-1140995 |
| Escherichia coli | association | intact | EBI-879491  |
| Escherichia coli | association | intact | EBI-1144655 |
| Escherichia coli | association | intact | EBI-890038  |
| Escherichia coli | association | intact | EBI-1141395 |
| Escherichia coli | association | intact | EBI-884726  |
| Escherichia coli | association | intact | EBI-1136177 |
| Escherichia coli | association | intact | EBI-1146553 |
| Escherichia coli | association | intact | EBI-879694  |
| Escherichia coli | association | intact | EBI-879643  |
| Escherichia coli | association | intact | EBI-879539  |
| Escherichia coli | association | intact | EBI-879589  |
| Escherichia coli | association | intact | EBI-886936  |
| Escherichia coli | association | intact | EBI-888958  |
| Escherichia coli | association | intact | EBI-881486  |
| Escherichia coli | association | intact | EBI-880595  |
| Escherichia coli | association | intact | EBI-880750  |
| Escherichia coli | association | intact | EBI-886059  |
| Escherichia coli | association | intact | EBI-1146806 |
| Escherichia coli | association | intact | EBI-887500  |
| Escherichia coli | association | intact | EBI-891798  |
| Escherichia coli | association | intact | EBI-883913  |
| Escherichia coli | association | intact | EBI-880430  |
| Escherichia coli | association | intact | EBI-885288  |
| Escherichia coli | association | intact | EBI-892010  |
| Escherichia coli | association | intact | EBI-882671  |
| Escherichia coli | association | intact | EBI-890236  |
| Escherichia coli | association | intact | EBI-888473  |
| Escherichia coli | association | intact | EBI-879914  |
| Escherichia coli | association | intact | EBI-892437  |
| Escherichia coli | association | intact | EBI-883733  |
| Escherichia coli | association | intact | EBI-880676  |
| Escherichia coli | association | intact | EBI-889906  |
| Escherichia coli | association | intact | EBI-886205  |

|                  |                      |        |             |
|------------------|----------------------|--------|-------------|
| Escherichia coli | association          | intact | EBI-888130  |
| Escherichia coli | association          | intact | EBI-878757  |
| Escherichia coli | association          | intact | EBI-881754  |
| Escherichia coli | association          | intact | EBI-879208  |
| Escherichia coli | association          | intact | EBI-879491  |
| Escherichia coli | association          | intact | EBI-881886  |
| Escherichia coli | association          | intact | EBI-879694  |
| Escherichia coli | association          | intact | EBI-879643  |
| Escherichia coli | association          | intact | EBI-879539  |
| Escherichia coli | association          | intact | EBI-1147418 |
| Escherichia coli | association          | intact | EBI-1138123 |
| Escherichia coli | association          | intact | EBI-883997  |
| Escherichia coli | association          | intact | EBI-885881  |
| Escherichia coli | association          | intact | EBI-1139703 |
| Escherichia coli | association          | intact | EBI-878757  |
| Escherichia coli | association          | intact | EBI-879491  |
| Escherichia coli | association          | intact | EBI-881886  |
| Escherichia coli | association          | intact | EBI-1146615 |
| Escherichia coli | association          | intact | EBI-1141591 |
| Escherichia coli | association          | intact | EBI-1141711 |
| Escherichia coli | association          | intact | EBI-891405  |
| Escherichia coli | association          | intact | EBI-1135515 |
| Escherichia coli | physical association | intact | EBI-888391  |
| Escherichia coli | association          | intact | EBI-1139997 |
| Escherichia coli | physical association | intact | EBI-849228  |
| Escherichia coli | association          | intact | EBI-880413  |
| Escherichia coli | association          | intact | EBI-885840  |
| Escherichia coli | physical association | intact | EBI-1169650 |
| Escherichia coli | physical association | intact | EBI-1169664 |
| Escherichia coli | association          | intact | EBI-880595  |



|                  |                      |        |             |
|------------------|----------------------|--------|-------------|
| Escherichia coli | association          | intact | EBI-2931981 |
| Escherichia coli | association          | intact | EBI-890008  |
| Escherichia coli | association          | intact | EBI-891089  |
| Escherichia coli | association          | intact | EBI-883913  |
| Escherichia coli | physical association | intact | EBI-1169701 |
| Escherichia coli | association          | intact | EBI-1147268 |
| Escherichia coli | association          | intact | EBI-892949  |
| Escherichia coli | association          | intact | EBI-886554  |
| Escherichia coli | direct interaction   | intact | EBI-1169577 |
| Escherichia coli | physical association | intact | EBI-1169591 |
| Escherichia coli | physical association | intact | EBI-1169605 |
| Escherichia coli | association          | intact | EBI-885288  |
| Escherichia coli | association          | intact | EBI-1146658 |
| Escherichia coli | association          | intact | EBI-882459  |
| Escherichia coli | association          | intact | EBI-881754  |
| Escherichia coli | association          | intact | EBI-1141281 |
| Escherichia coli | association          | intact | EBI-880595  |
| Escherichia coli | association          | intact | EBI-889800  |
| Escherichia coli | association          | intact | EBI-1139997 |
| Escherichia coli | association          | intact | EBI-1142392 |
| Escherichia coli | association          | intact | EBI-879643  |
| Escherichia coli | association          | intact | EBI-879539  |
| Escherichia coli | association          | intact | EBI-879589  |
| Escherichia coli | association          | intact | EBI-888958  |
| Escherichia coli | association          | intact | EBI-881486  |
| Escherichia coli | association          | intact | EBI-880595  |
| Escherichia coli | association          | intact | EBI-886556  |
| Escherichia coli | association          | intact | EBI-887500  |
| Escherichia coli | association          | intact | EBI-881374  |
| Escherichia coli | association          | intact | EBI-885288  |
| Escherichia coli | association          | intact | EBI-892010  |
| Escherichia coli | association          | intact | EBI-889536  |
| Escherichia coli | association          | intact | EBI-878697  |
| Escherichia coli | association          | intact | EBI-882671  |
| Escherichia coli | association          | intact | EBI-890236  |
| Escherichia coli | association          | intact | EBI-888473  |
| Escherichia coli | association          | intact | EBI-885881  |
| Escherichia coli | association          | intact | EBI-883733  |
| Escherichia coli | association          | intact | EBI-881988  |
| Escherichia coli | association          | intact | EBI-878757  |
| Escherichia coli | association          | intact | EBI-881754  |
| Escherichia coli | association          | intact | EBI-879208  |

|                  |                      |        |             |
|------------------|----------------------|--------|-------------|
| Escherichia coli | association          | intact | EBI-879491  |
| Escherichia coli | association          | intact | EBI-1137180 |
| Escherichia coli | association          | intact | EBI-1147620 |
| Escherichia coli | association          | intact | EBI-888130  |
| Escherichia coli | association          | intact | EBI-1140746 |
| Escherichia coli | association          | intact | EBI-1142232 |
| Escherichia coli | association          | intact | EBI-1142635 |
| Escherichia coli | association          | intact | EBI-892208  |
| Escherichia coli | association          | intact | EBI-885601  |
| Escherichia coli | physical association | intact | EBI-890190  |
| Escherichia coli | association          | intact | EBI-884189  |
| Escherichia coli | association          | intact | EBI-886936  |
| Escherichia coli | association          | intact | EBI-884415  |
| Escherichia coli | association          | intact | EBI-892889  |
| Escherichia coli | association          | intact | EBI-886509  |
| Escherichia coli | association          | intact | EBI-1144759 |
| Escherichia coli | association          | intact | EBI-1147818 |
| Escherichia coli | association          | intact | EBI-1141347 |
| Escherichia coli | association          | intact | EBI-888931  |
| Escherichia coli | association          | intact | EBI-891983  |
| Escherichia coli | association          | intact | EBI-883047  |
| Escherichia coli | association          | intact | EBI-887657  |
| Escherichia coli | association          | intact | EBI-880595  |
| Escherichia coli | association          | intact | EBI-893916  |
| Escherichia coli | association          | intact | EBI-893117  |
| Escherichia coli | association          | intact | EBI-886823  |
| Escherichia coli | association          | intact | EBI-893067  |
| Escherichia coli | association          | intact | EBI-886705  |
| Escherichia coli | association          | intact | EBI-1147147 |
| Escherichia coli | association          | intact | EBI-889421  |
| Escherichia coli | association          | intact | EBI-883913  |
| Escherichia coli | association          | intact | EBI-886894  |
| Escherichia coli | association          | intact | EBI-882754  |
| Escherichia coli | association          | intact | EBI-889160  |
| Escherichia coli | association          | intact | EBI-879426  |
| Escherichia coli | association          | intact | EBI-1145951 |
| Escherichia coli | association          | intact | EBI-879445  |
| Escherichia coli | association          | intact | EBI-883645  |
| Escherichia coli | association          | intact | EBI-1145142 |
| Escherichia coli | association          | intact | EBI-879304  |
| Escherichia coli | association          | intact | EBI-883170  |

|                  |                      |        |             |
|------------------|----------------------|--------|-------------|
| Escherichia coli | association          | intact | EBI-879261  |
| Escherichia coli | association          | intact | EBI-883046  |
| Escherichia coli | association          | intact | EBI-1147184 |
| Escherichia coli | physical association | intact | EBI-2123305 |
| Escherichia coli | physical association | intact | EBI-2116750 |
| Escherichia coli | association          | intact | EBI-886257  |
| Escherichia coli | association          | intact | EBI-892741  |
| Escherichia coli | association          | intact | EBI-879117  |
| Escherichia coli | association          | intact | EBI-879161  |
| Escherichia coli | association          | intact | EBI-891913  |
| Escherichia coli | association          | intact | EBI-891549  |
| Escherichia coli | association          | intact | EBI-888130  |
| Escherichia coli | association          | intact | EBI-884726  |
| Escherichia coli | association          | intact | EBI-884632  |
| Escherichia coli | association          | intact | EBI-882523  |
| Escherichia coli | association          | intact | EBI-879082  |
| Escherichia coli | association          | intact | EBI-878757  |
| Escherichia coli | association          | intact | EBI-1141855 |
| Escherichia coli | association          | intact | EBI-891354  |

|                  |                      |        |             |
|------------------|----------------------|--------|-------------|
| Escherichia coli | association          | intact | EBI-1146450 |
| Escherichia coli | association          | intact | EBI-892208  |
| Escherichia coli | association          | intact | EBI-885601  |
| Escherichia coli | association          | intact | EBI-884758  |
| Escherichia coli | association          | intact | EBI-1146120 |
| Escherichia coli | association          | intact | EBI-1137461 |
| Escherichia coli | association          | intact | EBI-880564  |
| Escherichia coli | association          | intact | EBI-1145744 |
| Escherichia coli | association          | intact | EBI-886509  |
| Escherichia coli | association          | intact | EBI-1146094 |
| Escherichia coli | physical association | intact | EBI-1145163 |
| Escherichia coli | association          | intact | EBI-1138471 |
| Escherichia coli | association          | intact | EBI-1147818 |
| Escherichia coli | association          | intact | EBI-1135340 |
| Escherichia coli | association          | intact | EBI-1141347 |
| Escherichia coli | association          | intact | EBI-888931  |
| Escherichia coli | association          | intact | EBI-891983  |
| Escherichia coli | association          | intact | EBI-1144247 |
| Escherichia coli | association          | intact | EBI-887634  |
| Escherichia coli | association          | intact | EBI-883047  |
| Escherichia coli | association          | intact | EBI-887657  |
| Escherichia coli | association          | intact | EBI-880595  |
| Escherichia coli | association          | intact | EBI-890481  |
| Escherichia coli | association          | intact | EBI-1137559 |
| Escherichia coli | association          | intact | EBI-880023  |

|                  |                      |        |             |
|------------------|----------------------|--------|-------------|
| Escherichia coli | association          | intact | EBI-1147515 |
| Escherichia coli | association          | intact | EBI-888239  |
| Escherichia coli | association          | intact | EBI-1143718 |
| Escherichia coli | association          | intact | EBI-893117  |
| Escherichia coli | association          | intact | EBI-886823  |
| Escherichia coli | association          | intact | EBI-1145014 |
| Escherichia coli | association          | intact | EBI-886705  |
| Escherichia coli | association          | intact | EBI-1147147 |
| Escherichia coli | association          | intact | EBI-1137072 |
| Escherichia coli | association          | intact | EBI-1143918 |
| Escherichia coli | association          | intact | EBI-886894  |
| Escherichia coli | association          | intact | EBI-1138014 |
| Escherichia coli | association          | intact | EBI-882671  |
| Escherichia coli | association          | intact | EBI-1138798 |
| Escherichia coli | association          | intact | EBI-879426  |
| Escherichia coli | association          | intact | EBI-1145951 |
| Escherichia coli | association          | intact | EBI-879445  |
| Escherichia coli | association          | intact | EBI-883645  |
| Escherichia coli | association          | intact | EBI-1145142 |
| Escherichia coli | physical association | intact | EBI-906604  |
| Escherichia coli | association          | intact | EBI-879354  |
| Escherichia coli | association          | intact | EBI-883271  |
| Escherichia coli | association          | intact | EBI-1145418 |
| Escherichia coli | association          | intact | EBI-879261  |
| Escherichia coli | association          | intact | EBI-883046  |
| Escherichia coli | association          | intact | EBI-1147184 |
| Escherichia coli | physical association | intact | EBI-1780332 |
| Escherichia coli | association          | intact | EBI-886257  |
| Escherichia coli | association          | intact | EBI-892741  |
| Escherichia coli | association          | intact | EBI-1144702 |
| Escherichia coli | association          | intact | EBI-1143317 |
| Escherichia coli | association          | intact | EBI-879117  |
| Escherichia coli | association          | intact | EBI-882858  |
| Escherichia coli | association          | intact | EBI-879161  |
| Escherichia coli | association          | intact | EBI-1146407 |
| Escherichia coli | association          | intact | EBI-1145355 |
| Escherichia coli | association          | intact | EBI-885071  |
| Escherichia coli | association          | intact | EBI-884735  |
| Escherichia coli | association          | intact | EBI-890346  |
| Escherichia coli | association          | intact | EBI-886205  |
| Escherichia coli | association          | intact | EBI-1136591 |
| Escherichia coli | association          | intact | EBI-888130  |
| Escherichia coli | association          | intact | EBI-893805  |
| Escherichia coli | association          | intact | EBI-884632  |
| Escherichia coli | association          | intact | EBI-1137384 |

|                  |             |        |             |
|------------------|-------------|--------|-------------|
| Escherichia coli | association | intact | EBI-888366  |
| Escherichia coli | association | intact | EBI-1141740 |
| Escherichia coli | association | intact | EBI-882523  |
| Escherichia coli | association | intact | EBI-879082  |
| Escherichia coli | association | intact | EBI-1137495 |
| Escherichia coli | association | intact | EBI-886623  |
| Escherichia coli | association | intact | EBI-1139910 |
| Escherichia coli | association | intact | EBI-1141855 |
| Escherichia coli | association | intact | EBI-1143500 |
| Escherichia coli | association | intact | EBI-886001  |

|                  |                      |        |             |
|------------------|----------------------|--------|-------------|
| Escherichia coli | association          | intact | EBI-885677  |
| Escherichia coli | association          | intact | EBI-892208  |
| Escherichia coli | association          | intact | EBI-885601  |
| Escherichia coli | physical association | intact | EBI-1771031 |
| Escherichia coli | association          | intact | EBI-1137435 |
| Escherichia coli | association          | intact | EBI-884758  |
| Escherichia coli | association          | intact | EBI-884584  |
| Escherichia coli | association          | intact | EBI-1146120 |
| Escherichia coli | association          | intact | EBI-1137461 |
| Escherichia coli | association          | intact | EBI-880564  |
| Escherichia coli | association          | intact | EBI-1145744 |
| Escherichia coli | association          | intact | EBI-883621  |
| Escherichia coli | association          | intact | EBI-886509  |
| Escherichia coli | association          | intact | EBI-1136784 |
| Escherichia coli | association          | intact | EBI-1138471 |
| Escherichia coli | association          | intact | EBI-1147810 |
| Escherichia coli | association          | intact | EBI-1147818 |
| Escherichia coli | association          | intact | EBI-887368  |
| Escherichia coli | association          | intact | EBI-1135340 |
| Escherichia coli | association          | intact | EBI-1141347 |
| Escherichia coli | association          | intact | EBI-888931  |
| Escherichia coli | association          | intact | EBI-883047  |
| Escherichia coli | association          | intact | EBI-887657  |
| Escherichia coli | association          | intact | EBI-880595  |
| Escherichia coli | association          | intact | EBI-890481  |
| Escherichia coli | association          | intact | EBI-880133  |
| Escherichia coli | association          | intact | EBI-889252  |
| Escherichia coli | physical association | intact | EBI-889372  |
| Escherichia coli | association          | intact | EBI-880023  |
| Escherichia coli | association          | intact | EBI-883484  |
| Escherichia coli | physical association | intact | EBI-888368  |
| Escherichia coli | association          | intact | EBI-1135798 |
| Escherichia coli | association          | intact | EBI-888239  |
| Escherichia coli | association          | intact | EBI-893117  |

|                  |                      |        |             |
|------------------|----------------------|--------|-------------|
| Escherichia coli | association          | intact | EBI-886823  |
| Escherichia coli | association          | intact | EBI-1145014 |
| Escherichia coli | association          | intact | EBI-886705  |
| Escherichia coli | association          | intact | EBI-1147147 |
| Escherichia coli | association          | intact | EBI-1143918 |
| Escherichia coli | association          | intact | EBI-893152  |
| Escherichia coli | association          | intact | EBI-886894  |
| Escherichia coli | association          | intact | EBI-1138014 |
| Escherichia coli | association          | intact | EBI-881374  |
| Escherichia coli | association          | intact | EBI-885288  |
| Escherichia coli | association          | intact | EBI-882671  |
| Escherichia coli | association          | intact | EBI-1138798 |
| Escherichia coli | association          | intact | EBI-879426  |
| Escherichia coli | association          | intact | EBI-1145951 |
| Escherichia coli | association          | intact | EBI-879445  |
| Escherichia coli | association          | intact | EBI-1145142 |
| Escherichia coli | physical association | intact | EBI-906604  |
| Escherichia coli | association          | intact | EBI-879354  |
| Escherichia coli | association          | intact | EBI-883271  |
| Escherichia coli | association          | intact | EBI-1145418 |
| Escherichia coli | association          | intact | EBI-879304  |
| Escherichia coli | association          | intact | EBI-883170  |
| Escherichia coli | association          | intact | EBI-1147178 |
| Escherichia coli | association          | intact | EBI-886257  |
| Escherichia coli | association          | intact | EBI-892741  |
| Escherichia coli | association          | intact | EBI-1144702 |
| Escherichia coli | physical association | intact | EBI-2116718 |
| Escherichia coli | association          | intact | EBI-1143317 |
| Escherichia coli | association          | intact | EBI-879117  |
| Escherichia coli | association          | intact | EBI-882858  |
| Escherichia coli | association          | intact | EBI-879161  |
| Escherichia coli | association          | intact | EBI-1147229 |
| Escherichia coli | association          | intact | EBI-1140712 |
| Escherichia coli | association          | intact | EBI-1145355 |
| Escherichia coli | association          | intact | EBI-1144358 |
| Escherichia coli | association          | intact | EBI-880676  |
| Escherichia coli | association          | intact | EBI-885071  |
| Escherichia coli | association          | intact | EBI-884735  |
| Escherichia coli | association          | intact | EBI-1141111 |
| Escherichia coli | association          | intact | EBI-890346  |
| Escherichia coli | association          | intact | EBI-1146658 |
| Escherichia coli | association          | intact | EBI-1136591 |
| Escherichia coli | association          | intact | EBI-888130  |
| Escherichia coli | association          | intact | EBI-893705  |
| Escherichia coli | association          | intact | EBI-879802  |

|                  |                      |        |             |
|------------------|----------------------|--------|-------------|
| Escherichia coli | association          | intact | EBI-884632  |
| Escherichia coli | association          | intact | EBI-1142543 |
| Escherichia coli | association          | intact | EBI-1137384 |
| Escherichia coli | association          | intact | EBI-1139002 |
| Escherichia coli | association          | intact | EBI-1141740 |
| Escherichia coli | association          | intact | EBI-882523  |
| Escherichia coli | association          | intact | EBI-879082  |
| Escherichia coli | association          | intact | EBI-1136892 |
| Escherichia coli | association          | intact | EBI-878757  |
| Escherichia coli | association          | intact | EBI-1137495 |
| Escherichia coli | association          | intact | EBI-879208  |
| Escherichia coli | association          | intact | EBI-1141281 |
| Escherichia coli | association          | intact | EBI-1141855 |
| Escherichia coli | association          | intact | EBI-1143500 |
| Escherichia coli | association          | intact | EBI-891354  |
| Escherichia coli | association          | intact | EBI-892208  |
| Escherichia coli | association          | intact | EBI-885601  |
| Escherichia coli | association          | intact | EBI-888931  |
| Escherichia coli | association          | intact | EBI-893117  |
| Escherichia coli | association          | intact | EBI-879354  |
| Escherichia coli | association          | intact | EBI-883271  |
| Escherichia coli | association          | intact | EBI-1145418 |
| Escherichia coli | association          | intact | EBI-879304  |
| Escherichia coli | association          | intact | EBI-883170  |
| Escherichia coli | association          | intact | EBI-879261  |
| Escherichia coli | association          | intact | EBI-883046  |
| Escherichia coli | physical association | intact | EBI-2123305 |
| Escherichia coli | physical association | intact | EBI-2116750 |
| Escherichia coli | association          | intact | EBI-882858  |
| Escherichia coli | association          | intact | EBI-879161  |
| Escherichia coli | association          | intact | EBI-1147229 |
| Escherichia coli | association          | intact | EBI-1147095 |
| Escherichia coli | association          | intact | EBI-1137140 |
| Escherichia coli | association          | intact | EBI-885677  |
| Escherichia coli | association          | intact | EBI-884758  |
| Escherichia coli | association          | intact | EBI-891593  |
| Escherichia coli | physical association | intact | EBI-906951  |
| Escherichia coli | association          | intact | EBI-879643  |
| Escherichia coli | association          | intact | EBI-883980  |

|                  |                      |        |             |
|------------------|----------------------|--------|-------------|
| Escherichia coli | association          | intact | EBI-879539  |
| Escherichia coli | association          | intact | EBI-879589  |
| Escherichia coli | association          | intact | EBI-888958  |
| Escherichia coli | association          | intact | EBI-881486  |
| Escherichia coli | association          | intact | EBI-1138172 |
| Escherichia coli | physical association | intact | EBI-906851  |
| Escherichia coli | association          | intact | EBI-1142841 |
| Escherichia coli | association          | intact | EBI-887293  |
| Escherichia coli | association          | intact | EBI-887392  |
| Escherichia coli | association          | intact | EBI-887148  |
| Escherichia coli | association          | intact | EBI-1141461 |
| Escherichia coli | association          | intact | EBI-887624  |
| Escherichia coli | association          | intact | EBI-880595  |
| Escherichia coli | association          | intact | EBI-886556  |
| Escherichia coli | association          | intact | EBI-1140965 |
| Escherichia coli | association          | intact | EBI-884859  |
| Escherichia coli | association          | intact | EBI-885106  |
| Escherichia coli | association          | intact | EBI-887783  |
| Escherichia coli | association          | intact | EBI-888863  |
| Escherichia coli | association          | intact | EBI-1139279 |
| Escherichia coli | association          | intact | EBI-887579  |
| Escherichia coli | association          | intact | EBI-887500  |
| Escherichia coli | association          | intact | EBI-1136768 |
| Escherichia coli | association          | intact | EBI-887767  |
| Escherichia coli | association          | intact | EBI-895127  |
| Escherichia coli | association          | intact | EBI-1138014 |
| Escherichia coli | association          | intact | EBI-885288  |
| Escherichia coli | association          | intact | EBI-892010  |
| Escherichia coli | association          | intact | EBI-889536  |
| Escherichia coli | association          | intact | EBI-878697  |
| Escherichia coli | association          | intact | EBI-882671  |
| Escherichia coli | association          | intact | EBI-879914  |
| Escherichia coli | association          | intact | EBI-883997  |
| Escherichia coli | association          | intact | EBI-879354  |
| Escherichia coli | association          | intact | EBI-1147184 |
| Escherichia coli | association          | intact | EBI-892741  |
| Escherichia coli | association          | intact | EBI-892437  |
| Escherichia coli | association          | intact | EBI-885881  |
| Escherichia coli | association          | intact | EBI-886442  |
| Escherichia coli | association          | intact | EBI-1141073 |
| Escherichia coli | association          | intact | EBI-890918  |
| Escherichia coli | association          | intact | EBI-880676  |
| Escherichia coli | association          | intact | EBI-887918  |
| Escherichia coli | association          | intact | EBI-890426  |
| Escherichia coli | association          | intact | EBI-882920  |



|                  |             |        |             |
|------------------|-------------|--------|-------------|
| Escherichia coli | association | intact | EBI-884548  |
| Escherichia coli | association | intact | EBI-886205  |
| Escherichia coli | association | intact | EBI-895036  |
| Escherichia coli | association | intact | EBI-2463360 |
| Escherichia coli | association | intact | EBI-1135871 |
| Escherichia coli | association | intact | EBI-882273  |
| Escherichia coli | association | intact | EBI-1139361 |
| Escherichia coli | association | intact | EBI-1142262 |
| Escherichia coli | association | intact | EBI-889746  |
| Escherichia coli | association | intact | EBI-887152  |
| Escherichia coli | association | intact | EBI-882523  |
| Escherichia coli | association | intact | EBI-878757  |
| Escherichia coli | association | intact | EBI-881754  |
| Escherichia coli | association | intact | EBI-882921  |
| Escherichia coli | association | intact | EBI-879208  |
| Escherichia coli | association | intact | EBI-1138351 |
| Escherichia coli | association | intact | EBI-1139089 |
| Escherichia coli | association | intact | EBI-886031  |
| Escherichia coli | association | intact | EBI-1140995 |
| Escherichia coli | association | intact | EBI-1143389 |
| Escherichia coli | association | intact | EBI-891042  |
| Escherichia coli | association | intact | EBI-1139043 |

|                  |             |        |             |
|------------------|-------------|--------|-------------|
| Escherichia coli | association | intact | EBI-886162  |
| Escherichia coli | association | intact | EBI-891593  |
| Escherichia coli | association | intact | EBI-891673  |
| Escherichia coli | association | intact | EBI-884584  |
| Escherichia coli | association | intact | EBI-885165  |
| Escherichia coli | association | intact | EBI-884189  |
| Escherichia coli | association | intact | EBI-883908  |
| Escherichia coli | association | intact | EBI-883980  |
| Escherichia coli | association | intact | EBI-883767  |
| Escherichia coli | association | intact | EBI-883848  |
| Escherichia coli | association | intact | EBI-881486  |
| Escherichia coli | association | intact | EBI-890702  |
| Escherichia coli | association | intact | EBI-890903  |
| Escherichia coli | association | intact | EBI-883621  |
| Escherichia coli | association | intact | EBI-891956  |
| Escherichia coli | association | intact | EBI-894927  |
| Escherichia coli | association | intact | EBI-887392  |
| Escherichia coli | association | intact | EBI-887368  |
| Escherichia coli | association | intact | EBI-1135340 |
| Escherichia coli | association | intact | EBI-1140172 |
| Escherichia coli | association | intact | EBI-888030  |
| Escherichia coli | association | intact | EBI-889279  |

|                  |             |        |             |
|------------------|-------------|--------|-------------|
| Escherichia coli | association | intact | EBI-891983  |
| Escherichia coli | association | intact | EBI-893878  |
| Escherichia coli | association | intact | EBI-883047  |
| Escherichia coli | association | intact | EBI-892795  |
| Escherichia coli | association | intact | EBI-880223  |
| Escherichia coli | association | intact | EBI-880166  |
| Escherichia coli | association | intact | EBI-880105  |
| Escherichia coli | association | intact | EBI-888653  |
| Escherichia coli | association | intact | EBI-888700  |
| Escherichia coli | association | intact | EBI-886932  |
| Escherichia coli | association | intact | EBI-894403  |
| Escherichia coli | association | intact | EBI-889772  |
| Escherichia coli | association | intact | EBI-888016  |
| Escherichia coli | association | intact | EBI-888757  |
| Escherichia coli | association | intact | EBI-883387  |
| Escherichia coli | association | intact | EBI-882847  |
| Escherichia coli | association | intact | EBI-893163  |
| Escherichia coli | association | intact | EBI-881219  |
| Escherichia coli | association | intact | EBI-892532  |
| Escherichia coli | association | intact | EBI-892599  |
| Escherichia coli | association | intact | EBI-889363  |
| Escherichia coli | association | intact | EBI-894976  |
| Escherichia coli | association | intact | EBI-889622  |
| Escherichia coli | association | intact | EBI-894594  |
| Escherichia coli | association | intact | EBI-894012  |
| Escherichia coli | association | intact | EBI-892247  |
| Escherichia coli | association | intact | EBI-886789  |
| Escherichia coli | association | intact | EBI-1136512 |
| Escherichia coli | association | intact | EBI-893067  |
| Escherichia coli | association | intact | EBI-886705  |
| Escherichia coli | association | intact | EBI-890645  |
| Escherichia coli | association | intact | EBI-891798  |
| Escherichia coli | association | intact | EBI-881343  |
| Escherichia coli | association | intact | EBI-895127  |
| Escherichia coli | association | intact | EBI-892291  |
| Escherichia coli | association | intact | EBI-879136  |
| Escherichia coli | association | intact | EBI-886554  |
| Escherichia coli | association | intact | EBI-1138014 |
| Escherichia coli | association | intact | EBI-894458  |
| Escherichia coli | association | intact | EBI-894497  |
| Escherichia coli | association | intact | EBI-885288  |
| Escherichia coli | association | intact | EBI-892010  |
| Escherichia coli | association | intact | EBI-889536  |
| Escherichia coli | association | intact | EBI-878697  |
| Escherichia coli | association | intact | EBI-1143426 |

|                  |                      |        |             |
|------------------|----------------------|--------|-------------|
| Escherichia coli | association          | intact | EBI-893488  |
| Escherichia coli | association          | intact | EBI-884810  |
| Escherichia coli | association          | intact | EBI-879354  |
| Escherichia coli | association          | intact | EBI-879304  |
| Escherichia coli | association          | intact | EBI-883170  |
| Escherichia coli | association          | intact | EBI-883046  |
| Escherichia coli | association          | intact | EBI-879161  |
| Escherichia coli | association          | intact | EBI-886442  |
| Escherichia coli | association          | intact | EBI-894346  |
| Escherichia coli | association          | intact | EBI-892392  |
| Escherichia coli | physical association | intact | EBI-885843  |
| Escherichia coli | association          | intact | EBI-887115  |
| Escherichia coli | association          | intact | EBI-886668  |
| Escherichia coli | association          | intact | EBI-891845  |
| Escherichia coli | association          | intact | EBI-884548  |
| Escherichia coli | association          | intact | EBI-2463360 |
| Escherichia coli | association          | intact | EBI-894652  |
| Escherichia coli | association          | intact | EBI-887152  |
| Escherichia coli | association          | intact | EBI-882523  |
| Escherichia coli | association          | intact | EBI-1136487 |
| Escherichia coli | association          | intact | EBI-892187  |
| Escherichia coli | association          | intact | EBI-892264  |
| Escherichia coli | association          | intact | EBI-1138811 |
| Escherichia coli | association          | intact | EBI-1139321 |
| Escherichia coli | association          | intact | EBI-893901  |
| Escherichia coli | association          | intact | EBI-893218  |
| Escherichia coli | association          | intact | EBI-893466  |
| Escherichia coli | association          | intact | EBI-891722  |
| Escherichia coli | association          | intact | EBI-882505  |
| Escherichia coli | association          | intact | EBI-1146668 |
| Escherichia coli | association          | intact | EBI-881486  |
| Escherichia coli | association          | intact | EBI-888757  |
| Escherichia coli | association          | intact | EBI-884810  |
| Escherichia coli | association          | intact | EBI-891136  |
| Escherichia coli | association          | intact | EBI-880676  |
| Escherichia coli | association          | intact | EBI-2463360 |
| Escherichia coli | association          | intact | EBI-880917  |
| Escherichia coli | association          | intact | EBI-882523  |
| Escherichia coli | association          | intact | EBI-891424  |
| Escherichia coli | association          | intact | EBI-888995  |
| Escherichia coli | association          | intact | EBI-889682  |
| Escherichia coli | association          | intact | EBI-1142209 |
| Escherichia coli | association          | intact | EBI-1135340 |

|                  |             |        |             |
|------------------|-------------|--------|-------------|
| Escherichia coli | association | intact | EBI-888653  |
| Escherichia coli | association | intact | EBI-881427  |
| Escherichia coli | association | intact | EBI-1137410 |
| Escherichia coli | association | intact | EBI-1135645 |
| Escherichia coli | association | intact | EBI-886668  |
| Escherichia coli | association | intact | EBI-892692  |
| Escherichia coli | association | intact | EBI-894652  |
| Escherichia coli | association | intact | EBI-887152  |
| Escherichia coli | association | intact | EBI-1135616 |
| Escherichia coli | association | intact | EBI-882523  |
| Escherichia coli | association | intact | EBI-1135630 |
| Escherichia coli | association | intact | EBI-891424  |
|                  |             |        |             |
| Escherichia coli | association | intact | EBI-1144119 |
| Escherichia coli | association | intact | EBI-882138  |
| Escherichia coli | association | intact | EBI-1140315 |
| Escherichia coli | association | intact | EBI-889682  |
| Escherichia coli | association | intact | EBI-885677  |
| Escherichia coli | association | intact | EBI-1146553 |
| Escherichia coli | association | intact | EBI-1140146 |
| Escherichia coli | association | intact | EBI-879643  |
| Escherichia coli | association | intact | EBI-1140933 |
| Escherichia coli | association | intact | EBI-879539  |
| Escherichia coli | association | intact | EBI-1138538 |
| Escherichia coli | association | intact | EBI-1140130 |
| Escherichia coli | association | intact | EBI-1136666 |
| Escherichia coli | association | intact | EBI-888958  |
| Escherichia coli | association | intact | EBI-881486  |
| Escherichia coli | association | intact | EBI-1145744 |
| Escherichia coli | association | intact | EBI-890702  |
| Escherichia coli | association | intact | EBI-883621  |
| Escherichia coli | association | intact | EBI-1143298 |
| Escherichia coli | association | intact | EBI-887293  |
| Escherichia coli | association | intact | EBI-887368  |
| Escherichia coli | association | intact | EBI-1141372 |
| Escherichia coli | association | intact | EBI-1145369 |
| Escherichia coli | association | intact | EBI-1144856 |
| Escherichia coli | association | intact | EBI-880595  |
| Escherichia coli | association | intact | EBI-886556  |
| Escherichia coli | association | intact | EBI-884859  |
| Escherichia coli | association | intact | EBI-880750  |
| Escherichia coli | association | intact | EBI-892341  |
| Escherichia coli | association | intact | EBI-883484  |
| Escherichia coli | association | intact | EBI-1142289 |
| Escherichia coli | association | intact | EBI-887783  |

|                  |             |        |             |
|------------------|-------------|--------|-------------|
| Escherichia coli | association | intact | EBI-881294  |
| Escherichia coli | association | intact | EBI-1135798 |
| Escherichia coli | association | intact | EBI-1136749 |
| Escherichia coli | association | intact | EBI-1138903 |
| Escherichia coli | association | intact | EBI-1141045 |
| Escherichia coli | association | intact | EBI-1141533 |
| Escherichia coli | association | intact | EBI-1144471 |
| Escherichia coli | association | intact | EBI-1142947 |
| Escherichia coli | association | intact | EBI-893916  |
| Escherichia coli | association | intact | EBI-1138921 |
| Escherichia coli | association | intact | EBI-1140341 |
| Escherichia coli | association | intact | EBI-887500  |
| Escherichia coli | association | intact | EBI-891089  |
| Escherichia coli | association | intact | EBI-883913  |
| Escherichia coli | association | intact | EBI-1143395 |
| Escherichia coli | association | intact | EBI-1139646 |
| Escherichia coli | association | intact | EBI-882652  |
| Escherichia coli | association | intact | EBI-1146417 |
| Escherichia coli | association | intact | EBI-1143946 |
| Escherichia coli | association | intact | EBI-1146286 |
| Escherichia coli | association | intact | EBI-1144013 |
| Escherichia coli | association | intact | EBI-878697  |
| Escherichia coli | association | intact | EBI-882671  |
| Escherichia coli | association | intact | EBI-890236  |
| Escherichia coli | association | intact | EBI-1138798 |
| Escherichia coli | association | intact | EBI-895082  |
| Escherichia coli | association | intact | EBI-879914  |
| Escherichia coli | association | intact | EBI-884810  |
| Escherichia coli | association | intact | EBI-891136  |
| Escherichia coli | association | intact | EBI-883997  |
| Escherichia coli | association | intact | EBI-879354  |
| Escherichia coli | association | intact | EBI-879261  |
| Escherichia coli | association | intact | EBI-879161  |
| Escherichia coli | association | intact | EBI-892437  |
| Escherichia coli | association | intact | EBI-885881  |
| Escherichia coli | association | intact | EBI-886442  |
| Escherichia coli | association | intact | EBI-1147905 |
| Escherichia coli | association | intact | EBI-892392  |
| Escherichia coli | association | intact | EBI-1138623 |
| Escherichia coli | association | intact | EBI-881988  |
| Escherichia coli | association | intact | EBI-889827  |
| Escherichia coli | association | intact | EBI-884548  |
| Escherichia coli | association | intact | EBI-882273  |
| Escherichia coli | association | intact | EBI-1142262 |
| Escherichia coli | association | intact | EBI-894652  |

|                  |             |        |             |
|------------------|-------------|--------|-------------|
| Escherichia coli | association | intact | EBI-889746  |
| Escherichia coli | association | intact | EBI-1141234 |
| Escherichia coli | association | intact | EBI-1139703 |
| Escherichia coli | association | intact | EBI-887152  |
| Escherichia coli | association | intact | EBI-880917  |
| Escherichia coli | association | intact | EBI-1141304 |
| Escherichia coli | association | intact | EBI-1141786 |
| Escherichia coli | association | intact | EBI-1141740 |
| Escherichia coli | association | intact | EBI-1141802 |
| Escherichia coli | association | intact | EBI-879082  |
| Escherichia coli | association | intact | EBI-882921  |
| Escherichia coli | association | intact | EBI-1138389 |
| Escherichia coli | association | intact | EBI-1140539 |
| Escherichia coli | association | intact | EBI-1141281 |
| Escherichia coli | association | intact | EBI-1142451 |
| Escherichia coli | association | intact | EBI-1142510 |
| Escherichia coli | association | intact | EBI-879491  |
| Escherichia coli | association | intact | EBI-891424  |
| Escherichia coli | association | intact | EBI-891722  |
| Escherichia coli | association | intact | EBI-1146506 |
| Escherichia coli | association | intact | EBI-1147040 |
| Escherichia coli | association | intact | EBI-1147927 |
| Escherichia coli | association | intact | EBI-1140044 |
| Escherichia coli | association | intact | EBI-1140972 |

|                  |             |        |             |
|------------------|-------------|--------|-------------|
| Escherichia coli | association | intact | EBI-888995  |
| Escherichia coli | association | intact | EBI-889682  |
| Escherichia coli | association | intact | EBI-882266  |
| Escherichia coli | association | intact | EBI-891593  |
| Escherichia coli | association | intact | EBI-891673  |
| Escherichia coli | association | intact | EBI-884189  |
| Escherichia coli | association | intact | EBI-883980  |
| Escherichia coli | association | intact | EBI-883767  |
| Escherichia coli | association | intact | EBI-894157  |
| Escherichia coli | association | intact | EBI-881486  |
| Escherichia coli | association | intact | EBI-890702  |
| Escherichia coli | association | intact | EBI-890903  |
| Escherichia coli | association | intact | EBI-891005  |
| Escherichia coli | association | intact | EBI-1135340 |
| Escherichia coli | association | intact | EBI-885330  |
| Escherichia coli | association | intact | EBI-894305  |
| Escherichia coli | association | intact | EBI-892341  |
| Escherichia coli | association | intact | EBI-887783  |
| Escherichia coli | association | intact | EBI-894403  |
| Escherichia coli | association | intact | EBI-888757  |

|                  |             |        |             |
|------------------|-------------|--------|-------------|
| Escherichia coli | association | intact | EBI-889363  |
| Escherichia coli | association | intact | EBI-891396  |
| Escherichia coli | association | intact | EBI-894976  |
| Escherichia coli | association | intact | EBI-892863  |
| Escherichia coli | association | intact | EBI-893916  |
| Escherichia coli | association | intact | EBI-888910  |
| Escherichia coli | association | intact | EBI-1138921 |
| Escherichia coli | association | intact | EBI-893067  |
| Escherichia coli | association | intact | EBI-890008  |
| Escherichia coli | association | intact | EBI-893285  |
| Escherichia coli | association | intact | EBI-893445  |
| Escherichia coli | association | intact | EBI-882652  |
| Escherichia coli | association | intact | EBI-889737  |
| Escherichia coli | association | intact | EBI-892010  |
| Escherichia coli | association | intact | EBI-889536  |
| Escherichia coli | association | intact | EBI-890236  |
| Escherichia coli | association | intact | EBI-888507  |
| Escherichia coli | association | intact | EBI-1137410 |
| Escherichia coli | association | intact | EBI-884810  |
| Escherichia coli | association | intact | EBI-891136  |
| Escherichia coli | association | intact | EBI-883271  |
| Escherichia coli | association | intact | EBI-883170  |
| Escherichia coli | association | intact | EBI-886442  |
| Escherichia coli | association | intact | EBI-886668  |
| Escherichia coli | association | intact | EBI-890426  |
| Escherichia coli | association | intact | EBI-891312  |
| Escherichia coli | association | intact | EBI-884548  |
| Escherichia coli | association | intact | EBI-892692  |
| Escherichia coli | association | intact | EBI-2463360 |
| Escherichia coli | association | intact | EBI-894652  |
| Escherichia coli | association | intact | EBI-887152  |
| Escherichia coli | association | intact | EBI-888366  |
| Escherichia coli | association | intact | EBI-882523  |
| Escherichia coli | association | intact | EBI-886031  |
| Escherichia coli | association | intact | EBI-1141091 |
| Escherichia coli | association | intact | EBI-1141281 |
| Escherichia coli | association | intact | EBI-891424  |
| Escherichia coli | association | intact | EBI-891722  |
| Escherichia coli | association | intact | EBI-889283  |
| Escherichia coli | association | intact | EBI-887431  |
| Escherichia coli | association | intact | EBI-889682  |
| Escherichia coli | association | intact | EBI-892208  |
| Escherichia coli | association | intact | EBI-881486  |
| Escherichia coli | association | intact | EBI-1135932 |

|                  |             |        |             |
|------------------|-------------|--------|-------------|
| Escherichia coli | association | intact | EBI-1140294 |
| Escherichia coli | association | intact | EBI-893916  |
| Escherichia coli | association | intact | EBI-891089  |
| Escherichia coli | association | intact | EBI-895082  |
| Escherichia coli | association | intact | EBI-884810  |
| Escherichia coli | association | intact | EBI-891136  |
| Escherichia coli | association | intact | EBI-883271  |
| Escherichia coli | association | intact | EBI-887152  |
| Escherichia coli | association | intact | EBI-1140187 |
| Escherichia coli | association | intact | EBI-891424  |
| Escherichia coli | association | intact | EBI-1144775 |

|                  |             |        |            |
|------------------|-------------|--------|------------|
| Escherichia coli | association | intact | EBI-886162 |
| Escherichia coli | association | intact | EBI-892312 |
| Escherichia coli | association | intact | EBI-891593 |
| Escherichia coli | association | intact | EBI-891481 |
| Escherichia coli | association | intact | EBI-883848 |
| Escherichia coli | association | intact | EBI-881486 |
| Escherichia coli | association | intact | EBI-891005 |
| Escherichia coli | association | intact | EBI-888030 |
| Escherichia coli | association | intact | EBI-886556 |
| Escherichia coli | association | intact | EBI-885437 |
| Escherichia coli | association | intact | EBI-885243 |
| Escherichia coli | association | intact | EBI-886859 |
| Escherichia coli | association | intact | EBI-887783 |
| Escherichia coli | association | intact | EBI-892599 |
| Escherichia coli | association | intact | EBI-894594 |
| Escherichia coli | association | intact | EBI-893067 |
| Escherichia coli | association | intact | EBI-893285 |
| Escherichia coli | association | intact | EBI-895127 |
| Escherichia coli | association | intact | EBI-881973 |
| Escherichia coli | association | intact | EBI-889451 |
| Escherichia coli | association | intact | EBI-892949 |
| Escherichia coli | association | intact | EBI-894458 |
| Escherichia coli | association | intact | EBI-892010 |
| Escherichia coli | association | intact | EBI-889536 |
| Escherichia coli | association | intact | EBI-890236 |
| Escherichia coli | association | intact | EBI-893488 |
| Escherichia coli | association | intact | EBI-884810 |
| Escherichia coli | association | intact | EBI-891136 |
| Escherichia coli | association | intact | EBI-883997 |
| Escherichia coli | association | intact | EBI-883271 |
| Escherichia coli | association | intact | EBI-883046 |
| Escherichia coli | association | intact | EBI-886442 |
| Escherichia coli | association | intact | EBI-892392 |



|                  |             |        |            |
|------------------|-------------|--------|------------|
| Escherichia coli | association | intact | EBI-886668 |
| Escherichia coli | association | intact | EBI-889827 |
| Escherichia coli | association | intact | EBI-891845 |
| Escherichia coli | association | intact | EBI-882273 |
| Escherichia coli | association | intact | EBI-891424 |
| Escherichia coli | association | intact | EBI-892517 |

|                  |             |        |             |
|------------------|-------------|--------|-------------|
| Escherichia coli | association | intact | EBI-881486  |
| Escherichia coli | association | intact | EBI-893249  |
| Escherichia coli | association | intact | EBI-891005  |
| Escherichia coli | association | intact | EBI-886556  |
| Escherichia coli | association | intact | EBI-892599  |
| Escherichia coli | association | intact | EBI-1135798 |
| Escherichia coli | association | intact | EBI-893916  |
| Escherichia coli | association | intact | EBI-891089  |
| Escherichia coli | association | intact | EBI-1138014 |
| Escherichia coli | association | intact | EBI-892010  |
| Escherichia coli | association | intact | EBI-889536  |
| Escherichia coli | association | intact | EBI-890236  |
| Escherichia coli | association | intact | EBI-884810  |
| Escherichia coli | association | intact | EBI-891136  |
| Escherichia coli | association | intact | EBI-892437  |
| Escherichia coli | association | intact | EBI-886668  |
| Escherichia coli | association | intact | EBI-887152  |
| Escherichia coli | association | intact | EBI-1137127 |
| Escherichia coli | association | intact | EBI-891424  |

|                  |                      |        |             |
|------------------|----------------------|--------|-------------|
| Escherichia coli | association          | intact | EBI-888995  |
| Escherichia coli | physical association | intact | EBI-2369907 |
| Escherichia coli | association          | intact | EBI-881486  |
| Escherichia coli | physical association | intact | EBI-2370560 |
| Escherichia coli | association          | intact | EBI-884859  |
| Escherichia coli | association          | intact | EBI-883484  |
| Escherichia coli | association          | intact | EBI-1142354 |
| Escherichia coli | association          | intact | EBI-891089  |
| Escherichia coli | association          | intact | EBI-892949  |
| Escherichia coli | association          | intact | EBI-895082  |
| Escherichia coli | association          | intact | EBI-883271  |
| Escherichia coli | association          | intact | EBI-892437  |
| Escherichia coli | association          | intact | EBI-2463360 |
| Escherichia coli | association          | intact | EBI-894652  |
| Escherichia coli | association          | intact | EBI-887152  |
| Escherichia coli | association          | intact | EBI-882921  |

|                  |                      |        |             |
|------------------|----------------------|--------|-------------|
| Escherichia coli | association          | intact | EBI-891424  |
| Escherichia coli | association          | intact | EBI-891722  |
| Escherichia coli | physical association | intact | EBI-891082  |
| Escherichia coli | association          | intact | EBI-888995  |
| Escherichia coli | association          | intact | EBI-879773  |
| Escherichia coli | association          | intact | EBI-886162  |
| Escherichia coli | association          | intact | EBI-1146605 |
| Escherichia coli | association          | intact | EBI-1140568 |
| Escherichia coli | association          | intact | EBI-1139399 |
| Escherichia coli | association          | intact | EBI-892312  |
| Escherichia coli | association          | intact | EBI-885677  |
| Escherichia coli | association          | intact | EBI-888051  |
| Escherichia coli | association          | intact | EBI-1141189 |
| Escherichia coli | association          | intact | EBI-1141166 |
| Escherichia coli | association          | intact | EBI-884758  |
| Escherichia coli | association          | intact | EBI-891593  |
| Escherichia coli | association          | intact | EBI-884811  |
| Escherichia coli | association          | intact | EBI-891481  |
| Escherichia coli | association          | intact | EBI-883908  |
| Escherichia coli | association          | intact | EBI-879643  |
| Escherichia coli | association          | intact | EBI-883980  |
| Escherichia coli | association          | intact | EBI-879539  |
| Escherichia coli | association          | intact | EBI-883767  |
| Escherichia coli | association          | intact | EBI-883726  |
| Escherichia coli | association          | intact | EBI-1147520 |
| Escherichia coli | association          | intact | EBI-880564  |
| Escherichia coli | association          | intact | EBI-888958  |
| Escherichia coli | association          | intact | EBI-881486  |
| Escherichia coli | association          | intact | EBI-878632  |
| Escherichia coli | association          | intact | EBI-1140853 |
| Escherichia coli | association          | intact | EBI-890702  |
| Escherichia coli | association          | intact | EBI-883418  |
| Escherichia coli | association          | intact | EBI-890751  |
| Escherichia coli | association          | intact | EBI-885640  |
| Escherichia coli | association          | intact | EBI-883621  |
| Escherichia coli | association          | intact | EBI-890853  |
| Escherichia coli | association          | intact | EBI-883577  |
| Escherichia coli | association          | intact | EBI-890990  |
| Escherichia coli | physical association | intact | EBI-1146823 |
| Escherichia coli | association          | intact | EBI-894927  |
| Escherichia coli | association          | intact | EBI-1141023 |
| Escherichia coli | association          | intact | EBI-880067  |
| Escherichia coli | association          | intact | EBI-1135730 |
| Escherichia coli | association          | intact | EBI-887293  |

|                  |                      |        |             |
|------------------|----------------------|--------|-------------|
| Escherichia coli | association          | intact | EBI-887148  |
| Escherichia coli | association          | intact | EBI-886164  |
| Escherichia coli | association          | intact | EBI-887368  |
| Escherichia coli | association          | intact | EBI-1135340 |
| Escherichia coli | association          | intact | EBI-1137688 |
| Escherichia coli | physical association | intact | EBI-1138791 |
| Escherichia coli | association          | intact | EBI-1141433 |
| Escherichia coli | association          | intact | EBI-1141473 |
| Escherichia coli | association          | intact | EBI-1146940 |
| Escherichia coli | association          | intact | EBI-888109  |
| Escherichia coli | association          | intact | EBI-881078  |
| Escherichia coli | association          | intact | EBI-889279  |
| Escherichia coli | association          | intact | EBI-1141898 |
| Escherichia coli | association          | intact | EBI-893878  |
| Escherichia coli | physical association | intact | EBI-878861  |
| Escherichia coli | association          | intact | EBI-1143235 |
| Escherichia coli | association          | intact | EBI-883047  |
| Escherichia coli | association          | intact | EBI-887657  |
| Escherichia coli | association          | intact | EBI-888219  |
| Escherichia coli | association          | intact | EBI-884206  |
| Escherichia coli | association          | intact | EBI-1142253 |
| Escherichia coli | association          | intact | EBI-884130  |
| Escherichia coli | association          | intact | EBI-892795  |
| Escherichia coli | association          | intact | EBI-880595  |
| Escherichia coli | association          | intact | EBI-886556  |
| Escherichia coli | association          | intact | EBI-890481  |
| Escherichia coli | association          | intact | EBI-895331  |
| Escherichia coli | association          | intact | EBI-880166  |
| Escherichia coli | association          | intact | EBI-880105  |
| Escherichia coli | association          | intact | EBI-884859  |
| Escherichia coli | association          | intact | EBI-894305  |
| Escherichia coli | association          | intact | EBI-880828  |
| Escherichia coli | association          | intact | EBI-1137559 |
| Escherichia coli | association          | intact | EBI-888653  |
| Escherichia coli | association          | intact | EBI-888700  |
| Escherichia coli | physical association | intact | EBI-881287  |
| Escherichia coli | association          | intact | EBI-886932  |
| Escherichia coli | association          | intact | EBI-885106  |
| Escherichia coli | association          | intact | EBI-892341  |
| Escherichia coli | association          | intact | EBI-879466  |
| Escherichia coli | association          | intact | EBI-886364  |
| Escherichia coli | association          | intact | EBI-894403  |
| Escherichia coli | association          | intact | EBI-889772  |
| Escherichia coli | association          | intact | EBI-888757  |
| Escherichia coli | association          | intact | EBI-883387  |

|                  |             |        |             |
|------------------|-------------|--------|-------------|
| Escherichia coli | association | intact | EBI-882847  |
| Escherichia coli | association | intact | EBI-893163  |
| Escherichia coli | association | intact | EBI-892932  |
| Escherichia coli | association | intact | EBI-889577  |
| Escherichia coli | association | intact | EBI-892532  |
| Escherichia coli | association | intact | EBI-892581  |
| Escherichia coli | association | intact | EBI-892599  |
| Escherichia coli | association | intact | EBI-886059  |
| Escherichia coli | association | intact | EBI-889363  |
| Escherichia coli | association | intact | EBI-1144520 |
| Escherichia coli | association | intact | EBI-1139075 |
| Escherichia coli | association | intact | EBI-1145123 |
| Escherichia coli | association | intact | EBI-894976  |
| Escherichia coli | association | intact | EBI-890013  |
| Escherichia coli | association | intact | EBI-1138694 |
| Escherichia coli | association | intact | EBI-889622  |
| Escherichia coli | association | intact | EBI-894594  |
| Escherichia coli | association | intact | EBI-894012  |
| Escherichia coli | association | intact | EBI-894052  |
| Escherichia coli | association | intact | EBI-894085  |
| Escherichia coli | association | intact | EBI-881701  |
| Escherichia coli | association | intact | EBI-893999  |
| Escherichia coli | association | intact | EBI-1142158 |
| Escherichia coli | association | intact | EBI-886789  |
| Escherichia coli | association | intact | EBI-893067  |
| Escherichia coli | association | intact | EBI-890645  |
| Escherichia coli | association | intact | EBI-890620  |
| Escherichia coli | association | intact | EBI-893285  |
| Escherichia coli | association | intact | EBI-887500  |
| Escherichia coli | association | intact | EBI-891798  |
| Escherichia coli | association | intact | EBI-887088  |
| Escherichia coli | association | intact | EBI-1145321 |
| Escherichia coli | association | intact | EBI-887767  |
| Escherichia coli | association | intact | EBI-881343  |
| Escherichia coli | association | intact | EBI-878620  |
| Escherichia coli | association | intact | EBI-895127  |
| Escherichia coli | association | intact | EBI-881046  |
| Escherichia coli | association | intact | EBI-882652  |
| Escherichia coli | association | intact | EBI-1139608 |
| Escherichia coli | association | intact | EBI-1146962 |
| Escherichia coli | association | intact | EBI-891277  |
| Escherichia coli | association | intact | EBI-894235  |
| Escherichia coli | association | intact | EBI-894458  |
| Escherichia coli | association | intact | EBI-894497  |
| Escherichia coli | association | intact | EBI-881132  |

|                  |                      |        |             |
|------------------|----------------------|--------|-------------|
| Escherichia coli | physical association | intact | EBI-887739  |
| Escherichia coli | association          | intact | EBI-885288  |
| Escherichia coli | association          | intact | EBI-892010  |
| Escherichia coli | association          | intact | EBI-878697  |
| Escherichia coli | association          | intact | EBI-882671  |
| Escherichia coli | association          | intact | EBI-890236  |
| Escherichia coli | association          | intact | EBI-888473  |
| Escherichia coli | association          | intact | EBI-1145286 |
| Escherichia coli | association          | intact | EBI-879914  |
| Escherichia coli | association          | intact | EBI-884810  |
| Escherichia coli | association          | intact | EBI-891136  |
| Escherichia coli | association          | intact | EBI-883997  |
| Escherichia coli | association          | intact | EBI-879354  |
| Escherichia coli | association          | intact | EBI-886257  |
| Escherichia coli | association          | intact | EBI-1144702 |
| Escherichia coli | association          | intact | EBI-879117  |
| Escherichia coli | association          | intact | EBI-879161  |
| Escherichia coli | association          | intact | EBI-892437  |
| Escherichia coli | association          | intact | EBI-885881  |
| Escherichia coli | association          | intact | EBI-886442  |
| Escherichia coli | association          | intact | EBI-886310  |
| Escherichia coli | association          | intact | EBI-892392  |
| Escherichia coli | association          | intact | EBI-1145849 |
| Escherichia coli | association          | intact | EBI-887115  |
| Escherichia coli | association          | intact | EBI-886105  |
| Escherichia coli | association          | intact | EBI-1145355 |
| Escherichia coli | association          | intact | EBI-1144358 |
| Escherichia coli | association          | intact | EBI-886668  |
| Escherichia coli | association          | intact | EBI-887918  |
| Escherichia coli | association          | intact | EBI-889906  |
| Escherichia coli | association          | intact | EBI-890426  |
| Escherichia coli | association          | intact | EBI-882920  |
| Escherichia coli | association          | intact | EBI-883462  |
| Escherichia coli | physical association | intact | EBI-1140593 |
| Escherichia coli | association          | intact | EBI-889827  |
| Escherichia coli | association          | intact | EBI-891845  |
| Escherichia coli | association          | intact | EBI-884548  |
| Escherichia coli | association          | intact | EBI-891201  |
| Escherichia coli | association          | intact | EBI-895036  |
| Escherichia coli | association          | intact | EBI-2463360 |
| Escherichia coli | association          | intact | EBI-884726  |
| Escherichia coli | association          | intact | EBI-882273  |
| Escherichia coli | association          | intact | EBI-1139361 |
| Escherichia coli | association          | intact | EBI-894652  |
| Escherichia coli | association          | intact | EBI-880917  |

|                  |             |        |             |
|------------------|-------------|--------|-------------|
| Escherichia coli | association | intact | EBI-888366  |
| Escherichia coli | association | intact | EBI-894844  |
| Escherichia coli | association | intact | EBI-879082  |
| Escherichia coli | association | intact | EBI-1135971 |
| Escherichia coli | association | intact | EBI-892187  |
| Escherichia coli | association | intact | EBI-892264  |
| Escherichia coli | association | intact | EBI-878757  |
| Escherichia coli | association | intact | EBI-881754  |
| Escherichia coli | association | intact | EBI-892986  |
| Escherichia coli | association | intact | EBI-882921  |
| Escherichia coli | association | intact | EBI-879208  |
| Escherichia coli | association | intact | EBI-1139089 |
| Escherichia coli | association | intact | EBI-1139143 |
| Escherichia coli | association | intact | EBI-1139235 |
| Escherichia coli | association | intact | EBI-1139564 |
| Escherichia coli | association | intact | EBI-1140414 |
| Escherichia coli | association | intact | EBI-1140602 |
| Escherichia coli | association | intact | EBI-1140947 |
| Escherichia coli | association | intact | EBI-1141281 |
| Escherichia coli | association | intact | EBI-1142273 |
| Escherichia coli | association | intact | EBI-893466  |
| Escherichia coli | association | intact | EBI-891722  |
| Escherichia coli | association | intact | EBI-884764  |
| Escherichia coli | association | intact | EBI-1144435 |
| Escherichia coli | association | intact | EBI-1144937 |
| Escherichia coli | association | intact | EBI-881886  |
| Escherichia coli | association | intact | EBI-1146192 |
| Escherichia coli | association | intact | EBI-887431  |
| Escherichia coli | association | intact | EBI-892517  |
| Escherichia coli | association | intact | EBI-1147040 |
| Escherichia coli | association | intact | EBI-1147604 |
| Escherichia coli | association | intact | EBI-1147552 |
| Escherichia coli | association | intact | EBI-1139487 |
| Escherichia coli | association | intact | EBI-1143971 |
| Escherichia coli | association | intact | EBI-1144399 |
| Escherichia coli | association | intact | EBI-888995  |
| Escherichia coli | association | intact | EBI-1136995 |
| Escherichia coli | association | intact | EBI-886162  |
| Escherichia coli | association | intact | EBI-883980  |
| Escherichia coli | association | intact | EBI-883767  |
| Escherichia coli | association | intact | EBI-894157  |
| Escherichia coli | association | intact | EBI-881486  |
| Escherichia coli | association | intact | EBI-1140201 |
| Escherichia coli | association | intact | EBI-890702  |

|                  |             |        |             |
|------------------|-------------|--------|-------------|
| Escherichia coli | association | intact | EBI-1137247 |
| Escherichia coli | association | intact | EBI-891005  |
| Escherichia coli | association | intact | EBI-891531  |
| Escherichia coli | association | intact | EBI-894403  |
| Escherichia coli | association | intact | EBI-888757  |
| Escherichia coli | association | intact | EBI-1135819 |
| Escherichia coli | association | intact | EBI-892599  |
| Escherichia coli | association | intact | EBI-1138091 |
| Escherichia coli | association | intact | EBI-888910  |
| Escherichia coli | association | intact | EBI-890008  |
| Escherichia coli | association | intact | EBI-893285  |
| Escherichia coli | association | intact | EBI-891089  |
| Escherichia coli | association | intact | EBI-1140650 |
| Escherichia coli | association | intact | EBI-892949  |
| Escherichia coli | association | intact | EBI-1136918 |
| Escherichia coli | association | intact | EBI-889536  |
| Escherichia coli | association | intact | EBI-890236  |
| Escherichia coli | association | intact | EBI-893488  |
| Escherichia coli | association | intact | EBI-895082  |
| Escherichia coli | association | intact | EBI-888507  |
| Escherichia coli | association | intact | EBI-884810  |
| Escherichia coli | association | intact | EBI-891136  |
| Escherichia coli | association | intact | EBI-883271  |
| Escherichia coli | association | intact | EBI-883170  |
| Escherichia coli | association | intact | EBI-882858  |
| Escherichia coli | association | intact | EBI-892437  |
| Escherichia coli | association | intact | EBI-1147229 |
| Escherichia coli | association | intact | EBI-1138623 |
| Escherichia coli | association | intact | EBI-890918  |
| Escherichia coli | association | intact | EBI-1147365 |
| Escherichia coli | association | intact | EBI-886668  |
| Escherichia coli | association | intact | EBI-1138108 |
| Escherichia coli | association | intact | EBI-884548  |
| Escherichia coli | association | intact | EBI-889884  |
| Escherichia coli | association | intact | EBI-894652  |
| Escherichia coli | association | intact | EBI-887152  |
| Escherichia coli | association | intact | EBI-882523  |
| Escherichia coli | association | intact | EBI-1136090 |
| Escherichia coli | association | intact | EBI-882921  |
| Escherichia coli | association | intact | EBI-891424  |
| Escherichia coli | association | intact | EBI-891722  |
| Escherichia coli | association | intact | EBI-1145667 |
| Escherichia coli | association | intact | EBI-1147040 |
| Escherichia coli | association | intact | EBI-1147927 |

|                  |             |        |             |
|------------------|-------------|--------|-------------|
| Escherichia coli | association | intact | EBI-891593  |
| Escherichia coli | association | intact | EBI-883767  |
| Escherichia coli | association | intact | EBI-888958  |
| Escherichia coli | association | intact | EBI-881486  |
| Escherichia coli | association | intact | EBI-893445  |
| Escherichia coli | association | intact | EBI-879136  |
| Escherichia coli | association | intact | EBI-894497  |
| Escherichia coli | association | intact | EBI-889536  |
| Escherichia coli | association | intact | EBI-888473  |
| Escherichia coli | association | intact | EBI-895082  |
| Escherichia coli | association | intact | EBI-884810  |
| Escherichia coli | association | intact | EBI-891136  |
| Escherichia coli | association | intact | EBI-883271  |
| Escherichia coli | association | intact | EBI-883170  |
| Escherichia coli | association | intact | EBI-1136591 |
| Escherichia coli | association | intact | EBI-2463360 |
| Escherichia coli | association | intact | EBI-882273  |
| Escherichia coli | association | intact | EBI-882523  |
| Escherichia coli | association | intact | EBI-1141281 |
| Escherichia coli | association | intact | EBI-891424  |
| Escherichia coli | association | intact | EBI-1143271 |
| Escherichia coli | association | intact | EBI-1142195 |
| Escherichia coli | association | intact | EBI-1145305 |
| Escherichia coli | association | intact | EBI-882266  |
| Escherichia coli | association | intact | EBI-1140568 |
| Escherichia coli | association | intact | EBI-885677  |
| Escherichia coli | association | intact | EBI-1146553 |
| Escherichia coli | association | intact | EBI-884189  |
| Escherichia coli | association | intact | EBI-1146120 |
| Escherichia coli | association | intact | EBI-1140146 |
| Escherichia coli | association | intact | EBI-883980  |
| Escherichia coli | association | intact | EBI-1140933 |
| Escherichia coli | association | intact | EBI-879539  |
| Escherichia coli | association | intact | EBI-1138538 |
| Escherichia coli | association | intact | EBI-1147520 |
| Escherichia coli | association | intact | EBI-894157  |
| Escherichia coli | association | intact | EBI-880545  |
| Escherichia coli | association | intact | EBI-888958  |
| Escherichia coli | association | intact | EBI-881486  |
| Escherichia coli | association | intact | EBI-878632  |
| Escherichia coli | association | intact | EBI-1138895 |
| Escherichia coli | association | intact | EBI-1144923 |
| Escherichia coli | association | intact | EBI-1145744 |
| Escherichia coli | association | intact | EBI-890702  |



|                  |                      |        |             |
|------------------|----------------------|--------|-------------|
| Escherichia coli | association          | intact | EBI-887148  |
| Escherichia coli | association          | intact | EBI-891005  |
| Escherichia coli | association          | intact | EBI-887941  |
| Escherichia coli | association          | intact | EBI-1147856 |
| Escherichia coli | association          | intact | EBI-1145333 |
| Escherichia coli | association          | intact | EBI-1135409 |
| Escherichia coli | association          | intact | EBI-1135340 |
| Escherichia coli | association          | intact | EBI-1144218 |
| Escherichia coli | association          | intact | EBI-1141347 |
| Escherichia coli | association          | intact | EBI-1140172 |
| Escherichia coli | association          | intact | EBI-889721  |
| Escherichia coli | association          | intact | EBI-1146053 |
| Escherichia coli | association          | intact | EBI-1141898 |
| Escherichia coli | association          | intact | EBI-1146586 |
| Escherichia coli | association          | intact | EBI-1146848 |
| Escherichia coli | association          | intact | EBI-1147071 |
| Escherichia coli | association          | intact | EBI-880595  |
| Escherichia coli | association          | intact | EBI-885490  |
| Escherichia coli | association          | intact | EBI-884859  |
| Escherichia coli | association          | intact | EBI-1143130 |
| Escherichia coli | association          | intact | EBI-1137559 |
| Escherichia coli | association          | intact | EBI-888653  |
| Escherichia coli | association          | intact | EBI-888700  |
| Escherichia coli | association          | intact | EBI-1138705 |
| Escherichia coli | association          | intact | EBI-1138525 |
| Escherichia coli | association          | intact | EBI-1143736 |
| Escherichia coli | physical association | intact | EBI-1147301 |
| Escherichia coli | association          | intact | EBI-883484  |
| Escherichia coli | association          | intact | EBI-894403  |
| Escherichia coli | association          | intact | EBI-888757  |
| Escherichia coli | association          | intact | EBI-881294  |
| Escherichia coli | association          | intact | EBI-889577  |
| Escherichia coli | association          | intact | EBI-892599  |
| Escherichia coli | association          | intact | EBI-886059  |
| Escherichia coli | association          | intact | EBI-1135798 |
| Escherichia coli | association          | intact | EBI-1147418 |
| Escherichia coli | association          | intact | EBI-1147482 |
| Escherichia coli | association          | intact | EBI-1139075 |
| Escherichia coli | association          | intact | EBI-1144562 |
| Escherichia coli | association          | intact | EBI-1141533 |
| Escherichia coli | association          | intact | EBI-1144720 |
| Escherichia coli | association          | intact | EBI-889622  |
| Escherichia coli | association          | intact | EBI-1144471 |
| Escherichia coli | association          | intact | EBI-879814  |
| Escherichia coli | association          | intact | EBI-881344  |

|                  |             |        |             |
|------------------|-------------|--------|-------------|
| Escherichia coli | association | intact | EBI-886823  |
| Escherichia coli | association | intact | EBI-1145014 |
| Escherichia coli | association | intact | EBI-886705  |
| Escherichia coli | association | intact | EBI-1145063 |
| Escherichia coli | association | intact | EBI-1138688 |
| Escherichia coli | association | intact | EBI-893285  |
| Escherichia coli | association | intact | EBI-1139693 |
| Escherichia coli | association | intact | EBI-884968  |
| Escherichia coli | association | intact | EBI-891798  |
| Escherichia coli | association | intact | EBI-883913  |
| Escherichia coli | association | intact | EBI-1147108 |
| Escherichia coli | association | intact | EBI-1147664 |
| Escherichia coli | association | intact | EBI-887767  |
| Escherichia coli | association | intact | EBI-895127  |
| Escherichia coli | association | intact | EBI-1141951 |
| Escherichia coli | association | intact | EBI-882754  |
| Escherichia coli | association | intact | EBI-879136  |
| Escherichia coli | association | intact | EBI-1146417 |
| Escherichia coli | association | intact | EBI-1143287 |
| Escherichia coli | association | intact | EBI-1146274 |
| Escherichia coli | association | intact | EBI-1146349 |
| Escherichia coli | association | intact | EBI-1146316 |
| Escherichia coli | association | intact | EBI-886554  |
| Escherichia coli | association | intact | EBI-1138150 |
| Escherichia coli | association | intact | EBI-1138445 |
| Escherichia coli | association | intact | EBI-1144013 |
| Escherichia coli | association | intact | EBI-885288  |
| Escherichia coli | association | intact | EBI-892010  |
| Escherichia coli | association | intact | EBI-878697  |
| Escherichia coli | association | intact | EBI-882671  |
| Escherichia coli | association | intact | EBI-890236  |
| Escherichia coli | association | intact | EBI-1138987 |
| Escherichia coli | association | intact | EBI-1147310 |
| Escherichia coli | association | intact | EBI-888473  |
| Escherichia coli | association | intact | EBI-1145286 |
| Escherichia coli | association | intact | EBI-881230  |
| Escherichia coli | association | intact | EBI-879914  |
| Escherichia coli | association | intact | EBI-884810  |
| Escherichia coli | association | intact | EBI-883997  |
| Escherichia coli | association | intact | EBI-879354  |
| Escherichia coli | association | intact | EBI-879304  |
| Escherichia coli | association | intact | EBI-883046  |
| Escherichia coli | association | intact | EBI-886257  |
| Escherichia coli | association | intact | EBI-892437  |
| Escherichia coli | association | intact | EBI-886442  |

|                  |             |        |             |
|------------------|-------------|--------|-------------|
| Escherichia coli | association | intact | EBI-1147905 |
| Escherichia coli | association | intact | EBI-1144410 |
| Escherichia coli | association | intact | EBI-1146244 |
| Escherichia coli | association | intact | EBI-890918  |
| Escherichia coli | association | intact | EBI-1145355 |
| Escherichia coli | association | intact | EBI-1144358 |
| Escherichia coli | association | intact | EBI-880676  |
| Escherichia coli | association | intact | EBI-1142107 |
| Escherichia coli | association | intact | EBI-1144382 |
| Escherichia coli | association | intact | EBI-889906  |
| Escherichia coli | association | intact | EBI-1145192 |
| Escherichia coli | association | intact | EBI-882920  |
| Escherichia coli | association | intact | EBI-1142723 |
| Escherichia coli | association | intact | EBI-882248  |
| Escherichia coli | association | intact | EBI-1140596 |
| Escherichia coli | association | intact | EBI-1136591 |
| Escherichia coli | association | intact | EBI-2463360 |
| Escherichia coli | association | intact | EBI-882273  |
| Escherichia coli | association | intact | EBI-1139361 |
| Escherichia coli | association | intact | EBI-1147985 |
| Escherichia coli | association | intact | EBI-894652  |
| Escherichia coli | association | intact | EBI-879802  |
| Escherichia coli | association | intact | EBI-887152  |
| Escherichia coli | association | intact | EBI-880917  |
| Escherichia coli | association | intact | EBI-1141792 |
| Escherichia coli | association | intact | EBI-1141740 |
| Escherichia coli | association | intact | EBI-882523  |
| Escherichia coli | association | intact | EBI-1135971 |
| Escherichia coli | association | intact | EBI-878757  |
| Escherichia coli | association | intact | EBI-881754  |
| Escherichia coli | association | intact | EBI-1137618 |
| Escherichia coli | association | intact | EBI-882921  |
| Escherichia coli | association | intact | EBI-879208  |
| Escherichia coli | association | intact | EBI-1138811 |
| Escherichia coli | association | intact | EBI-1138952 |
| Escherichia coli | association | intact | EBI-1139089 |
| Escherichia coli | association | intact | EBI-1139143 |
| Escherichia coli | association | intact | EBI-1139235 |
| Escherichia coli | association | intact | EBI-1139450 |
| Escherichia coli | association | intact | EBI-886031  |
| Escherichia coli | association | intact | EBI-1140539 |
| Escherichia coli | association | intact | EBI-890196  |
| Escherichia coli | association | intact | EBI-1140602 |
| Escherichia coli | association | intact | EBI-1142614 |
| Escherichia coli | association | intact | EBI-1142644 |

|                  |             |        |             |
|------------------|-------------|--------|-------------|
| Escherichia coli | association | intact | EBI-879491  |
| Escherichia coli | association | intact | EBI-1143500 |
| Escherichia coli | association | intact | EBI-1143860 |
| Escherichia coli | association | intact | EBI-1144243 |
| Escherichia coli | association | intact | EBI-1144453 |
| Escherichia coli | association | intact | EBI-1144619 |
| Escherichia coli | association | intact | EBI-1144775 |
| Escherichia coli | association | intact | EBI-1144937 |
| Escherichia coli | association | intact | EBI-1145259 |
| Escherichia coli | association | intact | EBI-1147273 |
| Escherichia coli | association | intact | EBI-1147604 |
| Escherichia coli | association | intact | EBI-1147639 |
| Escherichia coli | association | intact | EBI-1138998 |
| Escherichia coli | association | intact | EBI-1139043 |
| Escherichia coli | association | intact | EBI-1139487 |
| Escherichia coli | association | intact | EBI-1140044 |
| Escherichia coli | association | intact | EBI-1140703 |
| Escherichia coli | association | intact | EBI-1142812 |
| Escherichia coli | association | intact | EBI-1143583 |

|                  |             |        |             |
|------------------|-------------|--------|-------------|
| Escherichia coli | association | intact | EBI-881555  |
| Escherichia coli | association | intact | EBI-1142209 |
| Escherichia coli | association | intact | EBI-885677  |
| Escherichia coli | association | intact | EBI-1146553 |
| Escherichia coli | association | intact | EBI-1143934 |
| Escherichia coli | association | intact | EBI-884758  |
| Escherichia coli | association | intact | EBI-879694  |
| Escherichia coli | association | intact | EBI-1146120 |
| Escherichia coli | association | intact | EBI-1140146 |
| Escherichia coli | association | intact | EBI-1140146 |
| Escherichia coli | association | intact | EBI-879643  |
| Escherichia coli | association | intact | EBI-883980  |
| Escherichia coli | association | intact | EBI-1140933 |
| Escherichia coli | association | intact | EBI-879539  |
| Escherichia coli | association | intact | EBI-883767  |
| Escherichia coli | association | intact | EBI-879589  |
| Escherichia coli | association | intact | EBI-1137461 |
| Escherichia coli | association | intact | EBI-1138538 |
| Escherichia coli | association | intact | EBI-1140130 |
| Escherichia coli | association | intact | EBI-1145762 |
| Escherichia coli | association | intact | EBI-1147250 |
| Escherichia coli | association | intact | EBI-1136666 |
| Escherichia coli | association | intact | EBI-880564  |
| Escherichia coli | association | intact | EBI-880545  |
| Escherichia coli | association | intact | EBI-888958  |

|                  |             |        |             |
|------------------|-------------|--------|-------------|
| Escherichia coli | association | intact | EBI-881486  |
| Escherichia coli | association | intact | EBI-1145244 |
| Escherichia coli | association | intact | EBI-1140201 |
| Escherichia coli | association | intact | EBI-1138046 |
| Escherichia coli | association | intact | EBI-1145744 |
| Escherichia coli | association | intact | EBI-1144206 |
| Escherichia coli | association | intact | EBI-1137364 |
| Escherichia coli | association | intact | EBI-1142392 |
| Escherichia coli | association | intact | EBI-1137280 |
| Escherichia coli | association | intact | EBI-1143298 |
| Escherichia coli | association | intact | EBI-1143298 |
| Escherichia coli | association | intact | EBI-1142857 |
| Escherichia coli | association | intact | EBI-887148  |
| Escherichia coli | association | intact | EBI-1147065 |
| Escherichia coli | association | intact | EBI-887941  |
| Escherichia coli | association | intact | EBI-1145333 |
| Escherichia coli | association | intact | EBI-1145628 |
| Escherichia coli | association | intact | EBI-1135340 |
| Escherichia coli | association | intact | EBI-1135340 |
| Escherichia coli | association | intact | EBI-1144218 |
| Escherichia coli | association | intact | EBI-1141341 |
| Escherichia coli | association | intact | EBI-1145369 |
| Escherichia coli | association | intact | EBI-1135563 |
| Escherichia coli | association | intact | EBI-1146586 |
| Escherichia coli | association | intact | EBI-1145859 |
| Escherichia coli | association | intact | EBI-880595  |
| Escherichia coli | association | intact | EBI-1147620 |
| Escherichia coli | association | intact | EBI-1145783 |
| Escherichia coli | association | intact | EBI-1143130 |
| Escherichia coli | association | intact | EBI-1137559 |
| Escherichia coli | association | intact | EBI-1145795 |
| Escherichia coli | association | intact | EBI-879466  |
| Escherichia coli | association | intact | EBI-1140585 |
| Escherichia coli | association | intact | EBI-883484  |
| Escherichia coli | association | intact | EBI-1137105 |
| Escherichia coli | association | intact | EBI-1143812 |
| Escherichia coli | association | intact | EBI-1144887 |
| Escherichia coli | association | intact | EBI-888757  |
| Escherichia coli | association | intact | EBI-1146220 |
| Escherichia coli | association | intact | EBI-1135819 |
| Escherichia coli | association | intact | EBI-892599  |
| Escherichia coli | association | intact | EBI-886059  |
| Escherichia coli | association | intact | EBI-1135798 |
| Escherichia coli | association | intact | EBI-1139015 |
| Escherichia coli | association | intact | EBI-1145248 |

|                  |                      |        |             |
|------------------|----------------------|--------|-------------|
| Escherichia coli | association          | intact | EBI-1139075 |
| Escherichia coli | association          | intact | EBI-1138694 |
| Escherichia coli | association          | intact | EBI-1141533 |
| Escherichia coli | association          | intact | EBI-1135548 |
| Escherichia coli | association          | intact | EBI-1142783 |
| Escherichia coli | physical association | intact | EBI-1139222 |
| Escherichia coli | association          | intact | EBI-1145830 |
| Escherichia coli | association          | intact | EBI-879814  |
| Escherichia coli | association          | intact | EBI-1146441 |
| Escherichia coli | association          | intact | EBI-881344  |
| Escherichia coli | association          | intact | EBI-1138921 |
| Escherichia coli | association          | intact | EBI-1147403 |
| Escherichia coli | association          | intact | EBI-886823  |
| Escherichia coli | association          | intact | EBI-1145014 |
| Escherichia coli | association          | intact | EBI-886789  |
| Escherichia coli | association          | intact | EBI-1145063 |
| Escherichia coli | association          | intact | EBI-1138845 |
| Escherichia coli | association          | intact | EBI-1135688 |
| Escherichia coli | association          | intact | EBI-887500  |
| Escherichia coli | association          | intact | EBI-884968  |
| Escherichia coli | association          | intact | EBI-891798  |
| Escherichia coli | association          | intact | EBI-1140740 |
| Escherichia coli | association          | intact | EBI-883913  |
| Escherichia coli | association          | intact | EBI-1136768 |
| Escherichia coli | association          | intact | EBI-1145321 |
| Escherichia coli | association          | intact | EBI-887767  |
| Escherichia coli | association          | intact | EBI-1143395 |
| Escherichia coli | association          | intact | EBI-1142078 |
| Escherichia coli | association          | intact | EBI-1139646 |
| Escherichia coli | association          | intact | EBI-879136  |
| Escherichia coli | association          | intact | EBI-1146417 |
| Escherichia coli | association          | intact | EBI-1146274 |
| Escherichia coli | association          | intact | EBI-1146950 |
| Escherichia coli | association          | intact | EBI-886554  |
| Escherichia coli | association          | intact | EBI-1138014 |
| Escherichia coli | association          | intact | EBI-894235  |
| Escherichia coli | association          | intact | EBI-1139820 |
| Escherichia coli | association          | intact | EBI-1138150 |
| Escherichia coli | association          | intact | EBI-881132  |
| Escherichia coli | association          | intact | EBI-1138445 |
| Escherichia coli | association          | intact | EBI-885288  |
| Escherichia coli | association          | intact | EBI-1143090 |
| Escherichia coli | association          | intact | EBI-878697  |
| Escherichia coli | association          | intact | EBI-882671  |
| Escherichia coli | association          | intact | EBI-1147310 |

|                  |                      |        |             |
|------------------|----------------------|--------|-------------|
| Escherichia coli | association          | intact | EBI-888473  |
| Escherichia coli | association          | intact | EBI-893488  |
| Escherichia coli | physical association | intact | EBI-890107  |
| Escherichia coli | association          | intact | EBI-879914  |
| Escherichia coli | association          | intact | EBI-1146535 |
| Escherichia coli | association          | intact | EBI-891136  |
| Escherichia coli | association          | intact | EBI-883997  |
| Escherichia coli | association          | intact | EBI-879354  |
| Escherichia coli | association          | intact | EBI-1145418 |
| Escherichia coli | association          | intact | EBI-879261  |
| Escherichia coli | association          | intact | EBI-883046  |
| Escherichia coli | association          | intact | EBI-886257  |
| Escherichia coli | association          | intact | EBI-1143317 |
| Escherichia coli | association          | intact | EBI-885881  |
| Escherichia coli | association          | intact | EBI-1144087 |
| Escherichia coli | association          | intact | EBI-1145382 |
| Escherichia coli | association          | intact | EBI-1147905 |
| Escherichia coli | association          | intact | EBI-1144390 |
| Escherichia coli | association          | intact | EBI-1144905 |
| Escherichia coli | association          | intact | EBI-892392  |
| Escherichia coli | association          | intact | EBI-1145844 |
| Escherichia coli | association          | intact | EBI-890918  |
| Escherichia coli | association          | intact | EBI-883733  |
| Escherichia coli | association          | intact | EBI-1135713 |
| Escherichia coli | association          | intact | EBI-1145105 |
| Escherichia coli | association          | intact | EBI-1145639 |
| Escherichia coli | association          | intact | EBI-1147365 |
| Escherichia coli | association          | intact | EBI-1144358 |
| Escherichia coli | association          | intact | EBI-880676  |
| Escherichia coli | association          | intact | EBI-1145192 |
| Escherichia coli | association          | intact | EBI-1143623 |
| Escherichia coli | association          | intact | EBI-1143175 |
| Escherichia coli | association          | intact | EBI-1145723 |
| Escherichia coli | association          | intact | EBI-1136388 |
| Escherichia coli | association          | intact | EBI-1138884 |
| Escherichia coli | association          | intact | EBI-1136591 |
| Escherichia coli | association          | intact | EBI-1145396 |
| Escherichia coli | association          | intact | EBI-882273  |
| Escherichia coli | association          | intact | EBI-1142527 |
| Escherichia coli | association          | intact | EBI-894652  |
| Escherichia coli | association          | intact | EBI-889746  |
| Escherichia coli | association          | intact | EBI-1135792 |
| Escherichia coli | association          | intact | EBI-887152  |
| Escherichia coli | association          | intact | EBI-880917  |
| Escherichia coli | association          | intact | EBI-1141740 |

|                  |                      |        |             |
|------------------|----------------------|--------|-------------|
| Escherichia coli | association          | intact | EBI-882523  |
| Escherichia coli | association          | intact | EBI-879082  |
| Escherichia coli | association          | intact | EBI-1135902 |
| Escherichia coli | association          | intact | EBI-1137140 |
| Escherichia coli | association          | intact | EBI-1137618 |
| Escherichia coli | association          | intact | EBI-879840  |
| Escherichia coli | association          | intact | EBI-1137943 |
| Escherichia coli | association          | intact | EBI-1138038 |
| Escherichia coli | association          | intact | EBI-879208  |
| Escherichia coli | association          | intact | EBI-1138867 |
| Escherichia coli | association          | intact | EBI-1139020 |
| Escherichia coli | association          | intact | EBI-1139089 |
| Escherichia coli | association          | intact | EBI-1139110 |
| Escherichia coli | association          | intact | EBI-1139284 |
| Escherichia coli | association          | intact | EBI-1139235 |
| Escherichia coli | association          | intact | EBI-1139450 |
| Escherichia coli | association          | intact | EBI-1139542 |
| Escherichia coli | physical association | intact | EBI-1139933 |
| Escherichia coli | association          | intact | EBI-1140191 |
| Escherichia coli | association          | intact | EBI-1140433 |
| Escherichia coli | association          | intact | EBI-1140539 |
| Escherichia coli | association          | intact | EBI-1140539 |
| Escherichia coli | association          | intact | EBI-1140722 |
| Escherichia coli | association          | intact | EBI-1140746 |
| Escherichia coli | association          | intact | EBI-1140837 |
| Escherichia coli | association          | intact | EBI-1141395 |
| Escherichia coli | association          | intact | EBI-1141630 |
| Escherichia coli | association          | intact | EBI-879491  |
| Escherichia coli | association          | intact | EBI-891424  |
| Escherichia coli | association          | intact | EBI-1143364 |
| Escherichia coli | association          | intact | EBI-1143500 |
| Escherichia coli | association          | intact | EBI-1143609 |
| Escherichia coli | association          | intact | EBI-891354  |
| Escherichia coli | association          | intact | EBI-1144453 |
| Escherichia coli | association          | intact | EBI-1144619 |
| Escherichia coli | association          | intact | EBI-1144822 |
| Escherichia coli | association          | intact | EBI-1144937 |
| Escherichia coli | association          | intact | EBI-1145709 |
| Escherichia coli | association          | intact | EBI-1145719 |
| Escherichia coli | association          | intact | EBI-1146034 |
| Escherichia coli | physical association | intact | EBI-1146814 |
| Escherichia coli | association          | intact | EBI-1147273 |
| Escherichia coli | association          | intact | EBI-1147604 |
| Escherichia coli | association          | intact | EBI-1139487 |
| Escherichia coli | association          | intact | EBI-1140044 |



|                  |             |        |             |
|------------------|-------------|--------|-------------|
| Escherichia coli | association | intact | EBI-888995  |
| Escherichia coli | association | intact | EBI-889682  |
| Escherichia coli | association | intact | EBI-886162  |
| Escherichia coli | association | intact | EBI-1140568 |
| Escherichia coli | association | intact | EBI-1139399 |
| Escherichia coli | association | intact | EBI-885677  |
| Escherichia coli | association | intact | EBI-1146553 |
| Escherichia coli | association | intact | EBI-883452  |
| Escherichia coli | association | intact | EBI-885165  |
| Escherichia coli | association | intact | EBI-884189  |
| Escherichia coli | association | intact | EBI-879643  |
| Escherichia coli | association | intact | EBI-883980  |
| Escherichia coli | association | intact | EBI-879539  |
| Escherichia coli | association | intact | EBI-883767  |
| Escherichia coli | association | intact | EBI-883848  |
| Escherichia coli | association | intact | EBI-883726  |
| Escherichia coli | association | intact | EBI-1138538 |
| Escherichia coli | association | intact | EBI-1143817 |
| Escherichia coli | association | intact | EBI-1145762 |
| Escherichia coli | association | intact | EBI-894157  |
| Escherichia coli | association | intact | EBI-880545  |
| Escherichia coli | association | intact | EBI-888958  |
| Escherichia coli | association | intact | EBI-881486  |
| Escherichia coli | association | intact | EBI-890702  |
| Escherichia coli | association | intact | EBI-890751  |
| Escherichia coli | association | intact | EBI-883621  |
| Escherichia coli | association | intact | EBI-891956  |
| Escherichia coli | association | intact | EBI-894927  |
| Escherichia coli | association | intact | EBI-887539  |
| Escherichia coli | association | intact | EBI-885840  |
| Escherichia coli | association | intact | EBI-880067  |
| Escherichia coli | association | intact | EBI-1143298 |
| Escherichia coli | association | intact | EBI-887293  |
| Escherichia coli | association | intact | EBI-887148  |
| Escherichia coli | association | intact | EBI-888300  |
| Escherichia coli | association | intact | EBI-1147409 |
| Escherichia coli | association | intact | EBI-891005  |
| Escherichia coli | association | intact | EBI-887368  |
| Escherichia coli | association | intact | EBI-1137688 |
| Escherichia coli | association | intact | EBI-1141433 |
| Escherichia coli | association | intact | EBI-888030  |
| Escherichia coli | association | intact | EBI-889279  |
| Escherichia coli | association | intact | EBI-893878  |
| Escherichia coli | association | intact | EBI-1146586 |

|                  |                      |        |             |
|------------------|----------------------|--------|-------------|
| Escherichia coli | association          | intact | EBI-1145859 |
| Escherichia coli | association          | intact | EBI-883047  |
| Escherichia coli | association          | intact | EBI-887657  |
| Escherichia coli | association          | intact | EBI-1143469 |
| Escherichia coli | association          | intact | EBI-886556  |
| Escherichia coli | association          | intact | EBI-885330  |
| Escherichia coli | association          | intact | EBI-884859  |
| Escherichia coli | association          | intact | EBI-1143130 |
| Escherichia coli | association          | intact | EBI-1137559 |
| Escherichia coli | association          | intact | EBI-888653  |
| Escherichia coli | association          | intact | EBI-888700  |
| Escherichia coli | association          | intact | EBI-886932  |
| Escherichia coli | association          | intact | EBI-1138525 |
| Escherichia coli | association          | intact | EBI-892341  |
| Escherichia coli | association          | intact | EBI-883484  |
| Escherichia coli | association          | intact | EBI-887783  |
| Escherichia coli | association          | intact | EBI-894403  |
| Escherichia coli | association          | intact | EBI-888757  |
| Escherichia coli | association          | intact | EBI-883387  |
| Escherichia coli | association          | intact | EBI-1139633 |
| Escherichia coli | association          | intact | EBI-893163  |
| Escherichia coli | physical association | intact | EBI-889445  |
| Escherichia coli | association          | intact | EBI-892599  |
| Escherichia coli | association          | intact | EBI-886059  |
| Escherichia coli | association          | intact | EBI-894594  |
| Escherichia coli | association          | intact | EBI-1142794 |
| Escherichia coli | association          | intact | EBI-893916  |
| Escherichia coli | association          | intact | EBI-1147730 |
| Escherichia coli | association          | intact | EBI-1142433 |
| Escherichia coli | association          | intact | EBI-893117  |
| Escherichia coli | association          | intact | EBI-1145014 |
| Escherichia coli | association          | intact | EBI-886789  |
| Escherichia coli | association          | intact | EBI-893067  |
| Escherichia coli | association          | intact | EBI-886705  |
| Escherichia coli | association          | intact | EBI-1145063 |
| Escherichia coli | association          | intact | EBI-1143101 |
| Escherichia coli | association          | intact | EBI-893285  |
| Escherichia coli | association          | intact | EBI-887500  |
| Escherichia coli | association          | intact | EBI-891798  |
| Escherichia coli | association          | intact | EBI-891089  |
| Escherichia coli | association          | intact | EBI-883913  |
| Escherichia coli | association          | intact | EBI-893445  |
| Escherichia coli | association          | intact | EBI-895127  |
| Escherichia coli | association          | intact | EBI-886894  |
| Escherichia coli | association          | intact | EBI-1143287 |

|                  |                      |        |             |
|------------------|----------------------|--------|-------------|
| Escherichia coli | association          | intact | EBI-892949  |
| Escherichia coli | association          | intact | EBI-894458  |
| Escherichia coli | association          | intact | EBI-1138150 |
| Escherichia coli | association          | intact | EBI-881698  |
| Escherichia coli | association          | intact | EBI-894497  |
| Escherichia coli | association          | intact | EBI-881132  |
| Escherichia coli | association          | intact | EBI-885288  |
| Escherichia coli | association          | intact | EBI-892010  |
| Escherichia coli | association          | intact | EBI-889536  |
| Escherichia coli | association          | intact | EBI-878697  |
| Escherichia coli | association          | intact | EBI-882671  |
| Escherichia coli | association          | intact | EBI-890236  |
| Escherichia coli | physical association | intact | EBI-888410  |
| Escherichia coli | association          | intact | EBI-893488  |
| Escherichia coli | association          | intact | EBI-895082  |
| Escherichia coli | association          | intact | EBI-888507  |
| Escherichia coli | association          | intact | EBI-879914  |
| Escherichia coli | association          | intact | EBI-884810  |
| Escherichia coli | association          | intact | EBI-891136  |
| Escherichia coli | association          | intact | EBI-883997  |
| Escherichia coli | association          | intact | EBI-879354  |
| Escherichia coli | association          | intact | EBI-883271  |
| Escherichia coli | association          | intact | EBI-1145418 |
| Escherichia coli | association          | intact | EBI-883170  |
| Escherichia coli | association          | intact | EBI-879261  |
| Escherichia coli | association          | intact | EBI-883046  |
| Escherichia coli | association          | intact | EBI-886257  |
| Escherichia coli | association          | intact | EBI-892437  |
| Escherichia coli | association          | intact | EBI-885881  |
| Escherichia coli | association          | intact | EBI-890918  |
| Escherichia coli | association          | intact | EBI-1145639 |
| Escherichia coli | association          | intact | EBI-886668  |
| Escherichia coli | association          | intact | EBI-887918  |
| Escherichia coli | association          | intact | EBI-890426  |
| Escherichia coli | association          | intact | EBI-889827  |
| Escherichia coli | association          | intact | EBI-884548  |
| Escherichia coli | association          | intact | EBI-891201  |
| Escherichia coli | association          | intact | EBI-892692  |
| Escherichia coli | association          | intact | EBI-895036  |
| Escherichia coli | association          | intact | EBI-1136591 |
| Escherichia coli | association          | intact | EBI-2463360 |
| Escherichia coli | association          | intact | EBI-882273  |
| Escherichia coli | association          | intact | EBI-894652  |
| Escherichia coli | association          | intact | EBI-889746  |
| Escherichia coli | association          | intact | EBI-1139115 |

|                  |                      |        |             |
|------------------|----------------------|--------|-------------|
| Escherichia coli | association          | intact | EBI-887152  |
| Escherichia coli | association          | intact | EBI-888366  |
| Escherichia coli | association          | intact | EBI-1141740 |
| Escherichia coli | association          | intact | EBI-882523  |
| Escherichia coli | association          | intact | EBI-881754  |
| Escherichia coli | association          | intact | EBI-1137618 |
| Escherichia coli | association          | intact | EBI-892986  |
| Escherichia coli | association          | intact | EBI-882921  |
| Escherichia coli | association          | intact | EBI-1138481 |
| Escherichia coli | association          | intact | EBI-1139143 |
| Escherichia coli | association          | intact | EBI-886031  |
| Escherichia coli | association          | intact | EBI-890196  |
| Escherichia coli | association          | intact | EBI-1140602 |
| Escherichia coli | association          | intact | EBI-1141281 |
| Escherichia coli | association          | intact | EBI-1141336 |
| Escherichia coli | association          | intact | EBI-1141559 |
| Escherichia coli | association          | intact | EBI-1142494 |
| Escherichia coli | association          | intact | EBI-1142625 |
| Escherichia coli | association          | intact | EBI-1142806 |
| Escherichia coli | association          | intact | EBI-893466  |
| Escherichia coli | association          | intact | EBI-879491  |
| Escherichia coli | association          | intact | EBI-891424  |
| Escherichia coli | association          | intact | EBI-891722  |
| Escherichia coli | association          | intact | EBI-1144039 |
| Escherichia coli | association          | intact | EBI-1144619 |
| Escherichia coli | association          | intact | EBI-1144817 |
| Escherichia coli | association          | intact | EBI-1144937 |
| Escherichia coli | association          | intact | EBI-1145259 |
| Escherichia coli | association          | intact | EBI-887431  |
| Escherichia coli | association          | intact | EBI-1147040 |
| Escherichia coli | physical association | intact | EBI-1147280 |
| Escherichia coli | association          | intact | EBI-1147332 |
| Escherichia coli | association          | intact | EBI-1147604 |
| Escherichia coli | association          | intact | EBI-1142979 |
| Escherichia coli | association          | intact | EBI-884929  |
| Escherichia coli | association          | intact | EBI-882138  |
| Escherichia coli | association          | intact | EBI-888995  |
| Escherichia coli | association          | intact | EBI-889682  |
| Escherichia coli | association          | intact | EBI-891593  |
| Escherichia coli | association          | intact | EBI-891481  |
| Escherichia coli | association          | intact | EBI-883980  |
| Escherichia coli | association          | intact | EBI-881486  |
| Escherichia coli | association          | intact | EBI-890903  |
| Escherichia coli | association          | intact | EBI-891956  |

|                  |             |        |             |
|------------------|-------------|--------|-------------|
| Escherichia coli | association | intact | EBI-1143298 |
| Escherichia coli | association | intact | EBI-891005  |
| Escherichia coli | association | intact | EBI-1135932 |
| Escherichia coli | association | intact | EBI-886556  |
| Escherichia coli | association | intact | EBI-885243  |
| Escherichia coli | association | intact | EBI-894374  |
| Escherichia coli | association | intact | EBI-885106  |
| Escherichia coli | association | intact | EBI-892341  |
| Escherichia coli | association | intact | EBI-883484  |
| Escherichia coli | association | intact | EBI-893163  |
| Escherichia coli | association | intact | EBI-894976  |
| Escherichia coli | association | intact | EBI-893751  |
| Escherichia coli | association | intact | EBI-893916  |
| Escherichia coli | association | intact | EBI-893067  |
| Escherichia coli | association | intact | EBI-890008  |
| Escherichia coli | association | intact | EBI-882652  |
| Escherichia coli | association | intact | EBI-892949  |
| Escherichia coli | association | intact | EBI-892010  |
| Escherichia coli | association | intact | EBI-889536  |
| Escherichia coli | association | intact | EBI-890236  |
| Escherichia coli | association | intact | EBI-893488  |
| Escherichia coli | association | intact | EBI-884810  |
| Escherichia coli | association | intact | EBI-891136  |
| Escherichia coli | association | intact | EBI-883997  |
| Escherichia coli | association | intact | EBI-883271  |
| Escherichia coli | association | intact | EBI-883170  |
| Escherichia coli | association | intact | EBI-892741  |
| Escherichia coli | association | intact | EBI-892437  |
| Escherichia coli | association | intact | EBI-890918  |
| Escherichia coli | association | intact | EBI-886668  |
| Escherichia coli | association | intact | EBI-884548  |
| Escherichia coli | association | intact | EBI-889884  |
| Escherichia coli | association | intact | EBI-887152  |
| Escherichia coli | association | intact | EBI-888366  |
| Escherichia coli | association | intact | EBI-882523  |
| Escherichia coli | association | intact | EBI-881754  |
| Escherichia coli | association | intact | EBI-892986  |
| Escherichia coli | association | intact | EBI-882921  |
| Escherichia coli | association | intact | EBI-879491  |
| Escherichia coli | association | intact | EBI-891424  |
| Escherichia coli | association | intact | EBI-882138  |
| Escherichia coli | association | intact | EBI-878935  |
| Escherichia coli | association | intact | EBI-1143271 |
| Escherichia coli | association | intact | EBI-1142195 |

|                  |             |        |             |
|------------------|-------------|--------|-------------|
| Escherichia coli | association | intact | EBI-888995  |
| Escherichia coli | association | intact | EBI-889682  |
| Escherichia coli | association | intact | EBI-892312  |
| Escherichia coli | association | intact | EBI-885677  |
| Escherichia coli | association | intact | EBI-1146553 |
| Escherichia coli | association | intact | EBI-884758  |
| Escherichia coli | association | intact | EBI-891593  |
| Escherichia coli | association | intact | EBI-891673  |
| Escherichia coli | association | intact | EBI-884584  |
| Escherichia coli | association | intact | EBI-891481  |
| Escherichia coli | association | intact | EBI-884189  |
| Escherichia coli | association | intact | EBI-1146120 |
| Escherichia coli | association | intact | EBI-1140146 |
| Escherichia coli | association | intact | EBI-879643  |
| Escherichia coli | association | intact | EBI-883980  |
| Escherichia coli | association | intact | EBI-1140933 |
| Escherichia coli | association | intact | EBI-879539  |
| Escherichia coli | association | intact | EBI-883767  |
| Escherichia coli | association | intact | EBI-879589  |
| Escherichia coli | association | intact | EBI-883848  |
| Escherichia coli | association | intact | EBI-1137461 |
| Escherichia coli | association | intact | EBI-1138538 |
| Escherichia coli | association | intact | EBI-1140130 |
| Escherichia coli | association | intact | EBI-884415  |
| Escherichia coli | association | intact | EBI-1136666 |
| Escherichia coli | association | intact | EBI-894157  |
| Escherichia coli | association | intact | EBI-888958  |
| Escherichia coli | association | intact | EBI-881486  |
| Escherichia coli | association | intact | EBI-1145744 |
| Escherichia coli | association | intact | EBI-890702  |
| Escherichia coli | association | intact | EBI-1146527 |
| Escherichia coli | association | intact | EBI-894927  |
| Escherichia coli | association | intact | EBI-887293  |
| Escherichia coli | association | intact | EBI-887148  |
| Escherichia coli | association | intact | EBI-1146889 |
| Escherichia coli | association | intact | EBI-891005  |
| Escherichia coli | association | intact | EBI-887941  |
| Escherichia coli | association | intact | EBI-1145369 |
| Escherichia coli | association | intact | EBI-888030  |
| Escherichia coli | association | intact | EBI-894532  |
| Escherichia coli | association | intact | EBI-1146586 |
| Escherichia coli | association | intact | EBI-883047  |
| Escherichia coli | association | intact | EBI-888219  |
| Escherichia coli | association | intact | EBI-887624  |
| Escherichia coli | association | intact | EBI-886556  |

|                  |             |        |             |
|------------------|-------------|--------|-------------|
| Escherichia coli | association | intact | EBI-884306  |
| Escherichia coli | association | intact | EBI-891254  |
| Escherichia coli | association | intact | EBI-884859  |
| Escherichia coli | association | intact | EBI-894305  |
| Escherichia coli | association | intact | EBI-888653  |
| Escherichia coli | association | intact | EBI-888700  |
| Escherichia coli | association | intact | EBI-886932  |
| Escherichia coli | association | intact | EBI-880750  |
| Escherichia coli | association | intact | EBI-894374  |
| Escherichia coli | association | intact | EBI-891896  |
| Escherichia coli | association | intact | EBI-885106  |
| Escherichia coli | association | intact | EBI-892341  |
| Escherichia coli | association | intact | EBI-883484  |
| Escherichia coli | association | intact | EBI-887783  |
| Escherichia coli | association | intact | EBI-894403  |
| Escherichia coli | association | intact | EBI-888757  |
| Escherichia coli | association | intact | EBI-893163  |
| Escherichia coli | association | intact | EBI-894571  |
| Escherichia coli | association | intact | EBI-892599  |
| Escherichia coli | association | intact | EBI-886059  |
| Escherichia coli | association | intact | EBI-1135798 |
| Escherichia coli | association | intact | EBI-1136749 |
| Escherichia coli | association | intact | EBI-894976  |
| Escherichia coli | association | intact | EBI-890053  |
| Escherichia coli | association | intact | EBI-1138694 |
| Escherichia coli | association | intact | EBI-894594  |
| Escherichia coli | association | intact | EBI-893916  |
| Escherichia coli | association | intact | EBI-879814  |
| Escherichia coli | association | intact | EBI-886823  |
| Escherichia coli | association | intact | EBI-1145014 |
| Escherichia coli | association | intact | EBI-893067  |
| Escherichia coli | association | intact | EBI-881427  |
| Escherichia coli | association | intact | EBI-893285  |
| Escherichia coli | association | intact | EBI-887500  |
| Escherichia coli | association | intact | EBI-891089  |
| Escherichia coli | association | intact | EBI-883913  |
| Escherichia coli | association | intact | EBI-884491  |
| Escherichia coli | association | intact | EBI-1147664 |
| Escherichia coli | association | intact | EBI-1136768 |
| Escherichia coli | association | intact | EBI-890837  |
| Escherichia coli | association | intact | EBI-1145321 |
| Escherichia coli | association | intact | EBI-893445  |
| Escherichia coli | association | intact | EBI-895127  |
| Escherichia coli | association | intact | EBI-882652  |
| Escherichia coli | association | intact | EBI-1146417 |

|                  |             |        |             |
|------------------|-------------|--------|-------------|
| Escherichia coli | association | intact | EBI-1143287 |
| Escherichia coli | association | intact | EBI-1146274 |
| Escherichia coli | association | intact | EBI-892949  |
| Escherichia coli | association | intact | EBI-886554  |
| Escherichia coli | association | intact | EBI-1138014 |
| Escherichia coli | association | intact | EBI-894235  |
| Escherichia coli | association | intact | EBI-881698  |
| Escherichia coli | association | intact | EBI-894497  |
| Escherichia coli | association | intact | EBI-881132  |
| Escherichia coli | association | intact | EBI-1138445 |
| Escherichia coli | association | intact | EBI-1144013 |
| Escherichia coli | association | intact | EBI-885288  |
| Escherichia coli | association | intact | EBI-892010  |
| Escherichia coli | association | intact | EBI-889536  |
| Escherichia coli | association | intact | EBI-878697  |
| Escherichia coli | association | intact | EBI-882671  |
| Escherichia coli | association | intact | EBI-890236  |
| Escherichia coli | association | intact | EBI-1138798 |
| Escherichia coli | association | intact | EBI-1147310 |
| Escherichia coli | association | intact | EBI-888473  |
| Escherichia coli | association | intact | EBI-893488  |
| Escherichia coli | association | intact | EBI-879914  |
| Escherichia coli | association | intact | EBI-884810  |
| Escherichia coli | association | intact | EBI-891136  |
| Escherichia coli | association | intact | EBI-883997  |
| Escherichia coli | association | intact | EBI-879354  |
| Escherichia coli | association | intact | EBI-879261  |
| Escherichia coli | association | intact | EBI-883046  |
| Escherichia coli | association | intact | EBI-886257  |
| Escherichia coli | association | intact | EBI-892741  |
| Escherichia coli | association | intact | EBI-879161  |
| Escherichia coli | association | intact | EBI-892437  |
| Escherichia coli | association | intact | EBI-885881  |
| Escherichia coli | association | intact | EBI-886442  |
| Escherichia coli | association | intact | EBI-1145382 |
| Escherichia coli | association | intact | EBI-1147905 |
| Escherichia coli | association | intact | EBI-1138623 |
| Escherichia coli | association | intact | EBI-890918  |
| Escherichia coli | association | intact | EBI-1144358 |
| Escherichia coli | association | intact | EBI-880676  |
| Escherichia coli | association | intact | EBI-886668  |
| Escherichia coli | association | intact | EBI-884360  |
| Escherichia coli | association | intact | EBI-884548  |
| Escherichia coli | association | intact | EBI-892692  |
| Escherichia coli | association | intact | EBI-895036  |



|                  |             |        |             |
|------------------|-------------|--------|-------------|
| Escherichia coli | association | intact | EBI-2463360 |
| Escherichia coli | association | intact | EBI-1135871 |
| Escherichia coli | association | intact | EBI-882273  |
| Escherichia coli | association | intact | EBI-889884  |
| Escherichia coli | association | intact | EBI-1146412 |
| Escherichia coli | association | intact | EBI-894652  |
| Escherichia coli | association | intact | EBI-887152  |
| Escherichia coli | association | intact | EBI-880917  |
| Escherichia coli | association | intact | EBI-888366  |
| Escherichia coli | association | intact | EBI-1141740 |
| Escherichia coli | association | intact | EBI-1135902 |
| Escherichia coli | association | intact | EBI-892986  |
| Escherichia coli | association | intact | EBI-882921  |
| Escherichia coli | association | intact | EBI-879208  |
| Escherichia coli | association | intact | EBI-1139450 |
| Escherichia coli | association | intact | EBI-886031  |
| Escherichia coli | association | intact | EBI-1140539 |
| Escherichia coli | association | intact | EBI-890196  |
| Escherichia coli | association | intact | EBI-1141281 |
| Escherichia coli | association | intact | EBI-879491  |
| Escherichia coli | association | intact | EBI-891424  |
| Escherichia coli | association | intact | EBI-1143500 |
| Escherichia coli | association | intact | EBI-1144039 |
| Escherichia coli | association | intact | EBI-1144619 |
| Escherichia coli | association | intact | EBI-881886  |
| Escherichia coli | association | intact | EBI-1145259 |
| Escherichia coli | association | intact | EBI-887431  |
| Escherichia coli | association | intact | EBI-1146826 |
| Escherichia coli | association | intact | EBI-1147242 |
| Escherichia coli | association | intact | EBI-1139487 |
| Escherichia coli | association | intact | EBI-1140044 |

|                  |             |        |            |
|------------------|-------------|--------|------------|
| Escherichia coli | association | intact | EBI-882138 |
| Escherichia coli | association | intact | EBI-891673 |
| Escherichia coli | association | intact | EBI-881486 |
| Escherichia coli | association | intact | EBI-891956 |
| Escherichia coli | association | intact | EBI-891005 |
| Escherichia coli | association | intact | EBI-892341 |
| Escherichia coli | association | intact | EBI-883484 |
| Escherichia coli | association | intact | EBI-894403 |
| Escherichia coli | association | intact | EBI-894571 |
| Escherichia coli | association | intact | EBI-892599 |
| Escherichia coli | association | intact | EBI-891798 |
| Escherichia coli | association | intact | EBI-879914 |
| Escherichia coli | association | intact | EBI-884810 |

|                  |             |        |             |
|------------------|-------------|--------|-------------|
| Escherichia coli | association | intact | EBI-891136  |
| Escherichia coli | association | intact | EBI-886668  |
| Escherichia coli | association | intact | EBI-894652  |
| Escherichia coli | association | intact | EBI-887152  |
| Escherichia coli | association | intact | EBI-891424  |
| Escherichia coli | association | intact | EBI-1142184 |
| Escherichia coli | association | intact | EBI-1137163 |
| Escherichia coli | association | intact | EBI-1136229 |
| Escherichia coli | association | intact | EBI-1142209 |
| Escherichia coli | association | intact | EBI-1146553 |
| Escherichia coli | association | intact | EBI-1144661 |
| Escherichia coli | association | intact | EBI-1140667 |
| Escherichia coli | association | intact | EBI-1138244 |
| Escherichia coli | association | intact | EBI-1146120 |
| Escherichia coli | association | intact | EBI-883980  |
| Escherichia coli | association | intact | EBI-1137461 |
| Escherichia coli | association | intact | EBI-1138538 |
| Escherichia coli | association | intact | EBI-1140130 |
| Escherichia coli | association | intact | EBI-1145762 |
| Escherichia coli | association | intact | EBI-1136666 |
| Escherichia coli | association | intact | EBI-881486  |
| Escherichia coli | association | intact | EBI-1138895 |
| Escherichia coli | association | intact | EBI-1138046 |
| Escherichia coli | association | intact | EBI-890702  |
| Escherichia coli | association | intact | EBI-1146527 |
| Escherichia coli | association | intact | EBI-1143298 |
| Escherichia coli | association | intact | EBI-1142893 |
| Escherichia coli | association | intact | EBI-887293  |
| Escherichia coli | association | intact | EBI-1144769 |
| Escherichia coli | association | intact | EBI-1142607 |
| Escherichia coli | association | intact | EBI-1146889 |
| Escherichia coli | association | intact | EBI-1135340 |
| Escherichia coli | association | intact | EBI-1145369 |
| Escherichia coli | association | intact | EBI-888030  |
| Escherichia coli | association | intact | EBI-1147095 |
| Escherichia coli | association | intact | EBI-1141898 |
| Escherichia coli | association | intact | EBI-1144485 |
| Escherichia coli | association | intact | EBI-1146586 |
| Escherichia coli | association | intact | EBI-1145815 |
| Escherichia coli | association | intact | EBI-1143469 |
| Escherichia coli | association | intact | EBI-1143130 |
| Escherichia coli | association | intact | EBI-1137559 |
| Escherichia coli | association | intact | EBI-1138705 |
| Escherichia coli | association | intact | EBI-1144289 |

|                  |                      |        |             |
|------------------|----------------------|--------|-------------|
| Escherichia coli | association          | intact | EBI-1137105 |
| Escherichia coli | association          | intact | EBI-1143160 |
| Escherichia coli | association          | intact | EBI-888757  |
| Escherichia coli | association          | intact | EBI-1146400 |
| Escherichia coli | association          | intact | EBI-892532  |
| Escherichia coli | association          | intact | EBI-1135798 |
| Escherichia coli | association          | intact | EBI-1147482 |
| Escherichia coli | association          | intact | EBI-1141533 |
| Escherichia coli | association          | intact | EBI-1144720 |
| Escherichia coli | association          | intact | EBI-1138378 |
| Escherichia coli | association          | intact | EBI-1138371 |
| Escherichia coli | association          | intact | EBI-1135548 |
| Escherichia coli | association          | intact | EBI-1144471 |
| Escherichia coli | association          | intact | EBI-1138921 |
| Escherichia coli | association          | intact | EBI-1142433 |
| Escherichia coli | association          | intact | EBI-1145014 |
| Escherichia coli | association          | intact | EBI-1145063 |
| Escherichia coli | association          | intact | EBI-1138688 |
| Escherichia coli | association          | intact | EBI-1137743 |
| Escherichia coli | association          | intact | EBI-891798  |
| Escherichia coli | association          | intact | EBI-1142354 |
| Escherichia coli | physical association | intact | EBI-1146944 |
| Escherichia coli | association          | intact | EBI-1139510 |
| Escherichia coli | association          | intact | EBI-1144579 |
| Escherichia coli | association          | intact | EBI-1139646 |
| Escherichia coli | association          | intact | EBI-1146417 |
| Escherichia coli | association          | intact | EBI-1146286 |
| Escherichia coli | association          | intact | EBI-1146308 |
| Escherichia coli | association          | intact | EBI-1138014 |
| Escherichia coli | association          | intact | EBI-1142317 |
| Escherichia coli | association          | intact | EBI-1138445 |
| Escherichia coli | association          | intact | EBI-1147310 |
| Escherichia coli | association          | intact | EBI-895082  |
| Escherichia coli | association          | intact | EBI-1145286 |
| Escherichia coli | association          | intact | EBI-888507  |
| Escherichia coli | association          | intact | EBI-884810  |
| Escherichia coli | association          | intact | EBI-891136  |
| Escherichia coli | association          | intact | EBI-1144087 |
| Escherichia coli | association          | intact | EBI-1145382 |
| Escherichia coli | association          | intact | EBI-1147905 |
| Escherichia coli | association          | intact | EBI-892392  |
| Escherichia coli | association          | intact | EBI-1138623 |
| Escherichia coli | association          | intact | EBI-1146180 |
| Escherichia coli | association          | intact | EBI-1140712 |
| Escherichia coli | association          | intact | EBI-1145639 |

|                  |             |        |             |
|------------------|-------------|--------|-------------|
| Escherichia coli | association | intact | EBI-1147374 |
| Escherichia coli | association | intact | EBI-1147365 |
| Escherichia coli | association | intact | EBI-886668  |
| Escherichia coli | association | intact | EBI-1142107 |
| Escherichia coli | association | intact | EBI-1143343 |
| Escherichia coli | association | intact | EBI-1136591 |
| Escherichia coli | association | intact | EBI-2463360 |
| Escherichia coli | association | intact | EBI-1135871 |
| Escherichia coli | association | intact | EBI-1147746 |
| Escherichia coli | association | intact | EBI-1146412 |
| Escherichia coli | association | intact | EBI-1139361 |
| Escherichia coli | association | intact | EBI-894652  |
| Escherichia coli | association | intact | EBI-1139703 |
| Escherichia coli | association | intact | EBI-1141740 |
| Escherichia coli | association | intact | EBI-1146690 |
| Escherichia coli | association | intact | EBI-1141802 |
| Escherichia coli | association | intact | EBI-1144212 |
| Escherichia coli | association | intact | EBI-1136194 |
| Escherichia coli | association | intact | EBI-881754  |
| Escherichia coli | association | intact | EBI-1138811 |
| Escherichia coli | association | intact | EBI-1138952 |
| Escherichia coli | association | intact | EBI-1139033 |
| Escherichia coli | association | intact | EBI-1139235 |
| Escherichia coli | association | intact | EBI-1139338 |
| Escherichia coli | association | intact | EBI-1140446 |
| Escherichia coli | association | intact | EBI-1140539 |
| Escherichia coli | association | intact | EBI-1140820 |
| Escherichia coli | association | intact | EBI-1141091 |
| Escherichia coli | association | intact | EBI-1141281 |
| Escherichia coli | association | intact | EBI-1141314 |
| Escherichia coli | association | intact | EBI-1141389 |
| Escherichia coli | association | intact | EBI-1141559 |
| Escherichia coli | association | intact | EBI-1141862 |
| Escherichia coli | association | intact | EBI-1143500 |
| Escherichia coli | association | intact | EBI-1143617 |
| Escherichia coli | association | intact | EBI-1143850 |
| Escherichia coli | association | intact | EBI-1143894 |
| Escherichia coli | association | intact | EBI-1144423 |
| Escherichia coli | association | intact | EBI-1144619 |
| Escherichia coli | association | intact | EBI-1144951 |
| Escherichia coli | association | intact | EBI-1145259 |
| Escherichia coli | association | intact | EBI-1146826 |
| Escherichia coli | association | intact | EBI-1147242 |
| Escherichia coli | association | intact | EBI-1147830 |
| Escherichia coli | association | intact | EBI-1135979 |

|                  |             |        |             |
|------------------|-------------|--------|-------------|
| Escherichia coli | association | intact | EBI-1139043 |
| Escherichia coli | association | intact | EBI-1137207 |
| Escherichia coli | association | intact | EBI-883980  |
| Escherichia coli | association | intact | EBI-1142864 |
| Escherichia coli | association | intact | EBI-1143003 |
| Escherichia coli | association | intact | EBI-1136475 |
| Escherichia coli | association | intact | EBI-1145961 |
| Escherichia coli | association | intact | EBI-1144399 |
| Escherichia coli | association | intact | EBI-1146034 |
| Escherichia coli | association | intact | EBI-1136384 |
| Escherichia coli | association | intact | EBI-888130  |
| Escherichia coli | association | intact | EBI-1137900 |
| Escherichia coli | association | intact | EBI-1139291 |
| Escherichia coli | association | intact | EBI-1138417 |
| Escherichia coli | association | intact | EBI-1136427 |
| Escherichia coli | association | intact | EBI-1147473 |
| Escherichia coli | association | intact | EBI-1137933 |
| Escherichia coli | association | intact | EBI-1142040 |
| Escherichia coli | association | intact | EBI-1140853 |
| Escherichia coli | association | intact | EBI-1141425 |
| Escherichia coli | association | intact | EBI-1141433 |
| Escherichia coli | association | intact | EBI-1141461 |
| Escherichia coli | association | intact | EBI-1141341 |
| Escherichia coli | association | intact | EBI-1137880 |
| Escherichia coli | association | intact | EBI-1142029 |
| Escherichia coli | association | intact | EBI-1136343 |
| Escherichia coli | association | intact | EBI-1136317 |
| Escherichia coli | association | intact | EBI-1136313 |
| Escherichia coli | association | intact | EBI-1137661 |
| Escherichia coli | association | intact | EBI-1138445 |
| Escherichia coli | association | intact | EBI-1137818 |
| Escherichia coli | association | intact | EBI-1137829 |
| Escherichia coli | association | intact | EBI-882523  |

|                  |                      |        |             |
|------------------|----------------------|--------|-------------|
| Escherichia coli | association          | intact | EBI-1139025 |
| Escherichia coli | association          | intact | EBI-1139210 |
| Escherichia coli | association          | intact | EBI-1139627 |
| Escherichia coli | association          | intact | EBI-1140722 |
| Escherichia coli | association          | intact | EBI-1140807 |
| Escherichia coli | association          | intact | EBI-1141395 |
| Escherichia coli | association          | intact | EBI-1142763 |
| Escherichia coli | association          | intact | EBI-1136986 |
| Escherichia coli | association          | intact | EBI-1139043 |
| Escherichia coli | association          | intact | EBI-1137072 |
| Escherichia coli | association          | intact | EBI-893916  |
| Escherichia coli | association          | intact | EBI-889451  |
| Escherichia coli | association          | intact | EBI-1137155 |
| Escherichia coli | association          | intact | EBI-893588  |
| Escherichia coli | association          | intact | EBI-1138347 |
| Escherichia coli | association          | intact | EBI-371168  |
| Escherichia coli | physical association | intact | EBI-906971  |
| Escherichia coli | association          | intact | EBI-852941  |
| Escherichia coli | association          | intact | EBI-878935  |
| Escherichia coli | association          | intact | EBI-1141551 |
| Escherichia coli | association          | intact | EBI-878610  |
| Escherichia coli | association          | intact | EBI-1140736 |
| Escherichia coli | association          | intact | EBI-1136305 |
| Escherichia coli | association          | intact | EBI-884758  |
| Escherichia coli | association          | intact | EBI-884584  |
| Escherichia coli | association          | intact | EBI-879589  |
| Escherichia coli | association          | intact | EBI-894927  |
| Escherichia coli | association          | intact | EBI-894882  |
| Escherichia coli | association          | intact | EBI-889981  |
| Escherichia coli | association          | intact | EBI-881109  |
| Escherichia coli | association          | intact | EBI-1141452 |
| Escherichia coli | association          | intact | EBI-889279  |
| Escherichia coli | association          | intact | EBI-1144247 |
| Escherichia coli | association          | intact | EBI-883047  |
| Escherichia coli | association          | intact | EBI-880595  |
| Escherichia coli | association          | intact | EBI-891254  |
| Escherichia coli | association          | intact | EBI-890481  |

|                  |                      |        |             |
|------------------|----------------------|--------|-------------|
| Escherichia coli | association          | intact | EBI-880223  |
| Escherichia coli | association          | intact | EBI-880166  |
| Escherichia coli | association          | intact | EBI-880133  |
| Escherichia coli | association          | intact | EBI-878924  |
| Escherichia coli | association          | intact | EBI-880782  |
| Escherichia coli | direct interaction   | intact | EBI-1564228 |
| Escherichia coli | direct interaction   | intact | EBI-1564079 |
| Escherichia coli | direct interaction   | intact | EBI-1564398 |
| Escherichia coli | association          | intact | EBI-882847  |
| Escherichia coli | association          | intact | EBI-881611  |
| Escherichia coli | association          | intact | EBI-894976  |
| Escherichia coli | association          | intact | EBI-888239  |
| Escherichia coli | association          | intact | EBI-893751  |
| Escherichia coli | association          | intact | EBI-1139928 |
| Escherichia coli | association          | intact | EBI-879814  |
| Escherichia coli | association          | intact | EBI-886705  |
| Escherichia coli | association          | intact | EBI-883350  |
| Escherichia coli | association          | intact | EBI-883317  |
| Escherichia coli | association          | intact | EBI-887500  |
| Escherichia coli | direct interaction   | intact | EBI-1564331 |
| Escherichia coli | association          | intact | EBI-895127  |
| Escherichia coli | association          | intact | EBI-881262  |
| Escherichia coli | association          | intact | EBI-881374  |
| Escherichia coli | association          | intact | EBI-885288  |
| Escherichia coli | association          | intact | EBI-892010  |
| Escherichia coli | association          | intact | EBI-882671  |
| Escherichia coli | association          | intact | EBI-1143080 |
| Escherichia coli | association          | intact | EBI-879304  |
| Escherichia coli | physical association | intact | EBI-1213293 |
| Escherichia coli | association          | intact | EBI-880504  |
| Escherichia coli | direct interaction   | intact | EBI-761470  |
| Escherichia coli | association          | intact | EBI-1145355 |
| Escherichia coli | association          | intact | EBI-885071  |
| Escherichia coli | association          | intact | EBI-882920  |
| Escherichia coli | association          | intact | EBI-1147006 |
| Escherichia coli | association          | intact | EBI-885248  |
| Escherichia coli | association          | intact | EBI-878894  |
| Escherichia coli | association          | intact | EBI-888366  |
| Escherichia coli | association          | intact | EBI-853009  |
| Escherichia coli | physical association | intact | EBI-853024  |
| Escherichia coli | association          | intact | EBI-892986  |
| Escherichia coli | association          | intact | EBI-1141281 |
| Escherichia coli | association          | intact | EBI-1142117 |
| Escherichia coli | association          | intact | EBI-890038  |

|                  |                      |        |             |
|------------------|----------------------|--------|-------------|
| Escherichia coli | association          | intact | EBI-894403  |
| Escherichia coli | association          | intact | EBI-1136659 |
| Escherichia coli | association          | intact | EBI-880477  |
| Escherichia coli | association          | intact | EBI-886105  |
| Escherichia coli | association          | intact | EBI-1140113 |
| Escherichia coli | association          | intact | EBI-1139703 |
| Escherichia coli | association          | intact | EBI-882058  |
| Escherichia coli | association          | intact | EBI-1139780 |
| Escherichia coli | association          | intact | EBI-1139997 |
| Escherichia coli | association          | intact | EBI-1137711 |
| Escherichia coli | association          | intact | EBI-880595  |
| Escherichia coli | association          | intact | EBI-885288  |
| Escherichia coli | association          | intact | EBI-892010  |
| Escherichia coli | physical association | intact | EBI-891347  |
| Escherichia coli | association          | intact | EBI-882920  |
| Escherichia coli | association          | intact | EBI-1139824 |
| Escherichia coli | association          | intact | EBI-886031  |
| Escherichia coli | association          | intact | EBI-1140602 |
| Escherichia coli | association          | intact | EBI-1140371 |
| Escherichia coli | association          | intact | EBI-892838  |
| Escherichia coli | association          | intact | EBI-1145723 |
| Escherichia coli | association          | intact | EBI-884415  |
| Escherichia coli | association          | intact | EBI-1141247 |
| Escherichia coli | association          | intact | EBI-1142993 |
| Escherichia coli | association          | intact | EBI-1136976 |
| Escherichia coli | physical association | intact | EBI-1146632 |
| Escherichia coli | association          | intact | EBI-1137454 |
| Escherichia coli | association          | intact | EBI-1138667 |
| Escherichia coli | association          | intact | EBI-849332  |
| Escherichia coli | association          | intact | EBI-849357  |
| Escherichia coli | association          | intact | EBI-849381  |
| Escherichia coli | association          | intact | EBI-849407  |
| Escherichia coli | association          | intact | EBI-849464  |
| Escherichia coli | association          | intact | EBI-1136487 |
| Escherichia coli | association          | intact | EBI-883767  |
| Escherichia coli | association          | intact | EBI-884415  |



|                  |             |        |             |
|------------------|-------------|--------|-------------|
| Escherichia coli | association | intact | EBI-891956  |
| Escherichia coli | association | intact | EBI-1138552 |
| Escherichia coli | association | intact | EBI-880595  |
| Escherichia coli | association | intact | EBI-886556  |
| Escherichia coli | association | intact | EBI-1147325 |
| Escherichia coli | association | intact | EBI-1146204 |
| Escherichia coli | association | intact | EBI-1142794 |
| Escherichia coli | association | intact | EBI-892010  |
| Escherichia coli | association | intact | EBI-890426  |
| Escherichia coli | association | intact | EBI-893805  |
| Escherichia coli | association | intact | EBI-1146712 |
| Escherichia coli | association | intact | EBI-1140947 |
| Escherichia coli | association | intact | EBI-1141926 |
| Escherichia coli | association | intact | EBI-1146826 |

|                  |                      |        |             |
|------------------|----------------------|--------|-------------|
| Escherichia coli | physical association | intact | EBI-1212221 |
| Escherichia coli | physical association | intact | EBI-907273  |
| Escherichia coli | physical association | intact | EBI-1212123 |
| Escherichia coli | physical association | intact | EBI-1214222 |

|                  |             |        |             |
|------------------|-------------|--------|-------------|
| Escherichia coli | association | intact | EBI-1136646 |
| Escherichia coli | association | intact | EBI-1138150 |
| Escherichia coli | association | intact | EBI-1141091 |

|                  |             |        |             |
|------------------|-------------|--------|-------------|
| Escherichia coli | association | intact | EBI-1141837 |
| Escherichia coli | association | intact | EBI-1147429 |
| Escherichia coli | association | intact | EBI-1135403 |
| Escherichia coli | association | intact | EBI-892166  |
| Escherichia coli | association | intact | EBI-1136626 |
| Escherichia coli | association | intact | EBI-1137610 |
| Escherichia coli | association | intact | EBI-1143817 |
| Escherichia coli | association | intact | EBI-1136666 |
| Escherichia coli | association | intact | EBI-892889  |
| Escherichia coli | association | intact | EBI-890575  |
| Escherichia coli | association | intact | EBI-1135945 |
| Escherichia coli | association | intact | EBI-891956  |
| Escherichia coli | association | intact | EBI-1144206 |
| Escherichia coli | association | intact | EBI-1141023 |
| Escherichia coli | association | intact | EBI-1140328 |
| Escherichia coli | association | intact | EBI-882379  |
| Escherichia coli | association | intact | EBI-1143298 |

|                  |                      |        |             |
|------------------|----------------------|--------|-------------|
| Escherichia coli | association          | intact | EBI-1142885 |
| Escherichia coli | association          | intact | EBI-1146889 |
| Escherichia coli | association          | intact | EBI-1135340 |
| Escherichia coli | association          | intact | EBI-1141433 |
| Escherichia coli | association          | intact | EBI-888109  |
| Escherichia coli | association          | intact | EBI-1145961 |
| Escherichia coli | association          | intact | EBI-1144007 |
| Escherichia coli | association          | intact | EBI-1145859 |
| Escherichia coli | association          | intact | EBI-1140371 |
| Escherichia coli | association          | intact | EBI-1143201 |
| Escherichia coli | physical association | intact | EBI-851117  |
| Escherichia coli | association          | intact | EBI-1146462 |
| Escherichia coli | association          | intact | EBI-894403  |
| Escherichia coli | association          | intact | EBI-1143170 |
| Escherichia coli | association          | intact | EBI-1139075 |
| Escherichia coli | association          | intact | EBI-1140798 |
| Escherichia coli | association          | intact | EBI-1144720 |
| Escherichia coli | physical association | intact | EBI-1135545 |
| Escherichia coli | association          | intact | EBI-1142794 |
| Escherichia coli | association          | intact | EBI-1144107 |
| Escherichia coli | association          | intact | EBI-1140366 |
| Escherichia coli | association          | intact | EBI-1147403 |
| Escherichia coli | association          | intact | EBI-1145063 |
| Escherichia coli | association          | intact | EBI-2931981 |
| Escherichia coli | association          | intact | EBI-1135688 |
| Escherichia coli | association          | intact | EBI-1135683 |
| Escherichia coli | association          | intact | EBI-890645  |
| Escherichia coli | physical association | intact | EBI-1147439 |
| Escherichia coli | association          | intact | EBI-895127  |
| Escherichia coli | association          | intact | EBI-1139617 |
| Escherichia coli | association          | intact | EBI-1143946 |
| Escherichia coli | association          | intact | EBI-1146766 |
| Escherichia coli | association          | intact | EBI-1145404 |
| Escherichia coli | association          | intact | EBI-1145569 |
| Escherichia coli | association          | intact | EBI-1147433 |
| Escherichia coli | association          | intact | EBI-1144087 |
| Escherichia coli | association          | intact | EBI-1138332 |
| Escherichia coli | association          | intact | EBI-1144390 |
| Escherichia coli | association          | intact | EBI-1138623 |
| Escherichia coli | association          | intact | EBI-1135713 |
| Escherichia coli | association          | intact | EBI-1140393 |
| Escherichia coli | association          | intact | EBI-891913  |
| Escherichia coli | association          | intact | EBI-884360  |
| Escherichia coli | association          | intact | EBI-1145192 |
| Escherichia coli | association          | intact | EBI-1143623 |

|                  |                      |        |             |
|------------------|----------------------|--------|-------------|
| Escherichia coli | association          | intact | EBI-1143175 |
| Escherichia coli | association          | intact | EBI-1141111 |
| Escherichia coli | association          | intact | EBI-1142723 |
| Escherichia coli | association          | intact | EBI-1138884 |
| Escherichia coli | association          | intact | EBI-1136521 |
| Escherichia coli | association          | intact | EBI-371377  |
| Escherichia coli | association          | intact | EBI-369356  |
| Escherichia coli | association          | intact | EBI-1143374 |
| Escherichia coli | association          | intact | EBI-1136591 |
| Escherichia coli | association          | intact | EBI-1141740 |
| Escherichia coli | association          | intact | EBI-1144149 |
| Escherichia coli | association          | intact | EBI-882523  |
| Escherichia coli | association          | intact | EBI-1136090 |
| Escherichia coli | association          | intact | EBI-1136101 |
| Escherichia coli | association          | intact | EBI-1136531 |
| Escherichia coli | association          | intact | EBI-1138718 |
| Escherichia coli | association          | intact | EBI-1139020 |
| Escherichia coli | association          | intact | EBI-1139089 |
| Escherichia coli | association          | intact | EBI-1139110 |
| Escherichia coli | association          | intact | EBI-1139284 |
| Escherichia coli | association          | intact | EBI-1139235 |
| Escherichia coli | association          | intact | EBI-1139450 |
| Escherichia coli | association          | intact | EBI-1141091 |
| Escherichia coli | association          | intact | EBI-1141395 |
| Escherichia coli | association          | intact | EBI-1141926 |
| Escherichia coli | association          | intact | EBI-1143500 |
| Escherichia coli | association          | intact | EBI-1143785 |
| Escherichia coli | association          | intact | EBI-1144817 |
| Escherichia coli | association          | intact | EBI-1144822 |
| Escherichia coli | association          | intact | EBI-1144937 |
| Escherichia coli | association          | intact | EBI-1139487 |
| Escherichia coli | association          | intact | EBI-1139871 |
| Escherichia coli | association          | intact | EBI-1144545 |
| Escherichia coli | physical association | intact | EBI-1771057 |
| Escherichia coli | association          | intact | EBI-369356  |
| Escherichia coli | association          | intact | EBI-1139166 |
| Escherichia coli | association          | intact | EBI-1140807 |
| Escherichia coli | association          | intact | EBI-1139679 |
| Escherichia coli | association          | intact | EBI-1138274 |
| Escherichia coli | association          | intact | EBI-1135623 |

|                  |                      |        |             |
|------------------|----------------------|--------|-------------|
| Escherichia coli | association          | intact | EBI-1145040 |
| Escherichia coli | association          | intact | EBI-852941  |
| Escherichia coli | association          | intact | EBI-878935  |
| Escherichia coli | association          | intact | EBI-884758  |
| Escherichia coli | association          | intact | EBI-1137688 |
| Escherichia coli | association          | intact | EBI-880595  |
| Escherichia coli | association          | intact | EBI-1136708 |
| Escherichia coli | association          | intact | EBI-1146517 |
| Escherichia coli | association          | intact | EBI-885288  |
| Escherichia coli | association          | intact | EBI-882671  |
| Escherichia coli | association          | intact | EBI-1137410 |
| Escherichia coli | association          | intact | EBI-879914  |
| Escherichia coli | association          | intact | EBI-879161  |
| Escherichia coli | association          | intact | EBI-885881  |
| Escherichia coli | association          | intact | EBI-881988  |
| Escherichia coli | association          | intact | EBI-853009  |
| Escherichia coli | association          | intact | EBI-890196  |
| Escherichia coli | association          | intact | EBI-890038  |
| Escherichia coli | association          | intact | EBI-888219  |
| Escherichia coli | association          | intact | EBI-885677  |
| Escherichia coli | association          | intact | EBI-888958  |
| Escherichia coli | association          | intact | EBI-883621  |
| Escherichia coli | association          | intact | EBI-879814  |
| Escherichia coli | association          | intact | EBI-884968  |
| Escherichia coli | association          | intact | EBI-883913  |
| Escherichia coli | association          | intact | EBI-881374  |
| Escherichia coli | association          | intact | EBI-885288  |
| Escherichia coli | association          | intact | EBI-892010  |
| Escherichia coli | association          | intact | EBI-889536  |
| Escherichia coli | association          | intact | EBI-878697  |
| Escherichia coli | association          | intact | EBI-882671  |
| Escherichia coli | association          | intact | EBI-888473  |
| Escherichia coli | association          | intact | EBI-885881  |
| Escherichia coli | association          | intact | EBI-890918  |
| Escherichia coli | association          | intact | EBI-883733  |
| Escherichia coli | association          | intact | EBI-880676  |
| Escherichia coli | association          | intact | EBI-1144549 |
| Escherichia coli | association          | intact | EBI-888130  |
| Escherichia coli | association          | intact | EBI-882273  |
| Escherichia coli | association          | intact | EBI-878757  |
| Escherichia coli | association          | intact | EBI-879208  |
| Escherichia coli | physical association | intact | EBI-1141494 |

|                  |             |        |             |
|------------------|-------------|--------|-------------|
| Escherichia coli | association | intact | EBI-887293  |
| Escherichia coli | association | intact | EBI-887148  |
| Escherichia coli | association | intact | EBI-884206  |
| Escherichia coli | association | intact | EBI-881132  |
| Escherichia coli | association | intact | EBI-369356  |
| Escherichia coli | association | intact | EBI-371168  |
| Escherichia coli | association | intact | EBI-1137743 |
| Escherichia coli | association | intact | EBI-1146417 |
| Escherichia coli | association | intact | EBI-1143357 |
| Escherichia coli | association | intact | EBI-1137140 |
| Escherichia coli | association | intact | EBI-890053  |
| Escherichia coli | association | intact | EBI-889228  |
| Escherichia coli | association | intact | EBI-892692  |
| Escherichia coli | association | intact | EBI-1146377 |
| Escherichia coli | association | intact | EBI-1138783 |
| Escherichia coli | association | intact | EBI-1139864 |
| Escherichia coli | association | intact | EBI-895025  |
| Escherichia coli | association | intact | EBI-1144792 |
| Escherichia coli | association | intact | EBI-1139162 |
| Escherichia coli | association | intact | EBI-887063  |
| Escherichia coli | association | intact | EBI-1146884 |
| Escherichia coli | association | intact | EBI-1146377 |
| Escherichia coli | association | intact | EBI-895331  |
| Escherichia coli | association | intact | EBI-1139271 |
| Escherichia coli | association | intact | EBI-1138903 |
| Escherichia coli | association | intact | EBI-1138694 |
| Escherichia coli | association | intact | EBI-1137674 |
| Escherichia coli | association | intact | EBI-1138932 |
| Escherichia coli | association | intact | EBI-1138150 |
| Escherichia coli | association | intact | EBI-1144294 |
| Escherichia coli | association | intact | EBI-1142928 |
| Escherichia coli | association | intact | EBI-1146025 |
| Escherichia coli | association | intact | EBI-1137753 |
| Escherichia coli | association | intact | EBI-1139321 |
| Escherichia coli | association | intact | EBI-1141091 |
| Escherichia coli | association | intact | EBI-1147927 |
| Escherichia coli | association | intact | EBI-369356  |

|                  |                      |        |             |
|------------------|----------------------|--------|-------------|
| Escherichia coli | association          | intact | EBI-371168  |
| Escherichia coli | association          | intact | EBI-881486  |
| Escherichia coli | association          | intact | EBI-893552  |
| Escherichia coli | physical association | intact | EBI-906643  |
| Escherichia coli | association          | intact | EBI-1137818 |
| Escherichia coli | physical association | intact | EBI-1770945 |
| Escherichia coli | association          | intact | EBI-369356  |
| Escherichia coli | association          | intact | EBI-371168  |
| Escherichia coli | association          | intact | EBI-1142184 |
| Escherichia coli | association          | intact | EBI-881486  |
| Escherichia coli | association          | intact | EBI-894739  |
| Escherichia coli | association          | intact | EBI-889086  |
| Escherichia coli | association          | intact | EBI-1137140 |
| Escherichia coli | association          | intact | EBI-891424  |
| Escherichia coli | association          | intact | EBI-1142959 |
| Escherichia coli | association          | intact | EBI-1143404 |
| Escherichia coli | association          | intact | EBI-883577  |
| Escherichia coli | association          | intact | EBI-882023  |
| Escherichia coli | association          | intact | EBI-1135754 |
| Escherichia coli | association          | intact | EBI-1143661 |
| Escherichia coli | association          | intact | EBI-1141045 |
| Escherichia coli | association          | intact | EBI-1145791 |
| Escherichia coli | association          | intact | EBI-889536  |
| Escherichia coli | association          | intact | EBI-888130  |
| Escherichia coli | association          | intact | EBI-1142273 |
| Escherichia coli | association          | intact | EBI-1142232 |
| Escherichia coli | association          | intact | EBI-1143531 |
| Escherichia coli | association          | intact | EBI-1146841 |
| Escherichia coli | association          | intact | EBI-1146730 |
| Escherichia coli | association          | intact | EBI-1146494 |
| Escherichia coli | association          | intact | EBI-883418  |
| Escherichia coli | physical association | intact | EBI-1771500 |
| Escherichia coli | association          | intact | EBI-1141359 |
| Escherichia coli | association          | intact | EBI-1142533 |
| Escherichia coli | association          | intact | EBI-1140245 |
| Escherichia coli | association          | intact | EBI-1136956 |

|                  |                      |        |             |
|------------------|----------------------|--------|-------------|
| Escherichia coli | association          | intact | EBI-1147000 |
| Escherichia coli | association          | intact | EBI-1142158 |
| Escherichia coli | association          | intact | EBI-1136022 |
| Escherichia coli | association          | intact | EBI-1144696 |
| Escherichia coli | association          | intact | EBI-1147174 |
| Escherichia coli | association          | intact | EBI-879354  |
| Escherichia coli | association          | intact | EBI-883271  |
| Escherichia coli | association          | intact | EBI-1146171 |
| Escherichia coli | association          | intact | EBI-1136223 |
| Escherichia coli | association          | intact | EBI-1139210 |
| Escherichia coli | association          | intact | EBI-1140746 |
|                  |                      |        |             |
| Escherichia coli | association          | intact | EBI-1145305 |
| Escherichia coli | physical association | intact | EBI-1771057 |
| Escherichia coli | association          | intact | EBI-1147944 |
| Escherichia coli | association          | intact | EBI-880413  |
| Escherichia coli | association          | intact | EBI-1138760 |
| Escherichia coli | association          | intact | EBI-1144007 |
| Escherichia coli | association          | intact | EBI-1140263 |
| Escherichia coli | association          | intact | EBI-1137911 |
| Escherichia coli | association          | intact | EBI-1141261 |
| Escherichia coli | association          | intact | EBI-1145821 |
|                  |                      |        |             |
| Escherichia coli | association          | intact | EBI-1139739 |
| Escherichia coli | association          | intact | EBI-1139761 |
| Escherichia coli | physical association | intact | EBI-906647  |
| Escherichia coli | physical association | intact | EBI-889336  |
| Escherichia coli | physical association | intact | EBI-1770961 |
| Escherichia coli | association          | intact | EBI-1141145 |
| Escherichia coli | association          | intact | EBI-1144792 |
| Escherichia coli | association          | intact | EBI-1143531 |
|                  |                      |        |             |
| Escherichia coli | association          | intact | EBI-1138177 |
| Escherichia coli | association          | intact | EBI-892932  |
| Escherichia coli | association          | intact | EBI-881611  |
| Escherichia coli | association          | intact | EBI-1137971 |
| Escherichia coli | association          | intact | EBI-1137983 |
| Escherichia coli | association          | intact | EBI-888239  |
|                  |                      |        |             |
| Escherichia coli | association          | intact | EBI-884206  |
| Escherichia coli | association          | intact | EBI-884130  |
| Escherichia coli | association          | intact | EBI-892247  |
| Escherichia coli | association          | intact | EBI-1147263 |
| Escherichia coli | association          | intact | EBI-1146342 |
| Escherichia coli | association          | intact | EBI-881988  |

|                  |                      |        |             |
|------------------|----------------------|--------|-------------|
| Escherichia coli | association          | intact | EBI-1147968 |
| Escherichia coli | association          | intact | EBI-1146913 |
| Escherichia coli | association          | intact | EBI-1135340 |
| Escherichia coli | association          | intact | EBI-1135688 |
| Escherichia coli | association          | intact | EBI-1139475 |
| Escherichia coli | association          | intact | EBI-1147510 |
| Escherichia coli | association          | intact | EBI-891896  |
| Escherichia coli | association          | intact | EBI-895247  |
| Escherichia coli | physical association | intact | EBI-1771534 |
| Escherichia coli | association          | intact | EBI-1139979 |
| Escherichia coli | association          | intact | EBI-892010  |
| Escherichia coli | association          | intact | EBI-1144294 |
| Escherichia coli | association          | intact | EBI-886684  |
| Escherichia coli | association          | intact | EBI-881926  |
| Escherichia coli | physical association | intact | EBI-885862  |
| Escherichia coli | association          | intact | EBI-892264  |
| Escherichia coli | association          | intact | EBI-1142099 |
| Escherichia coli | association          | intact | EBI-889915  |
| Escherichia coli | association          | intact | EBI-886164  |
| Escherichia coli | association          | intact | EBI-884695  |
| Escherichia coli | association          | intact | EBI-888239  |
| Escherichia coli | association          | intact | EBI-892010  |
| Escherichia coli | association          | intact | EBI-891549  |
| Escherichia coli | association          | intact | EBI-884726  |
| Escherichia coli | association          | intact | EBI-883824  |
| Escherichia coli | physical association | intact | EBI-1771534 |
| Escherichia coli | association          | intact | EBI-1138724 |
| Escherichia coli | physical association | intact | EBI-2369599 |
| Escherichia coli | association          | intact | EBI-1136768 |
| Escherichia coli | association          | intact | EBI-1143804 |
| Escherichia coli | association          | intact | EBI-878680  |
| Escherichia coli | association          | intact | EBI-1144798 |
| Escherichia coli | physical association | intact | EBI-2369887 |
| Escherichia coli | association          | intact | EBI-1143877 |
| Escherichia coli | association          | intact | EBI-890853  |
| Escherichia coli | association          | intact | EBI-891656  |
| Escherichia coli | physical association | intact | EBI-2369977 |
| Escherichia coli | association          | intact | EBI-1141359 |



|                  |                      |        |             |
|------------------|----------------------|--------|-------------|
| Escherichia coli | physical association | intact | EBI-2369428 |
| Escherichia coli | physical association | intact | EBI-2369433 |
| Escherichia coli | association          | intact | EBI-885106  |
| Escherichia coli | association          | intact | EBI-1140007 |
| Escherichia coli | association          | intact | EBI-1142947 |
| Escherichia coli | association          | intact | EBI-893980  |
| Escherichia coli | physical association | intact | EBI-2369439 |
| Escherichia coli | association          | intact | EBI-1147737 |
| Escherichia coli | association          | intact | EBI-1146690 |
| Escherichia coli | association          | intact | EBI-1142744 |
| Escherichia coli | association          | intact | EBI-1137711 |
| Escherichia coli | association          | intact | EBI-887148  |
| Escherichia coli | association          | intact | EBI-886059  |
| Escherichia coli | association          | intact | EBI-882273  |
| Escherichia coli | association          | intact | EBI-1142253 |
| Escherichia coli | association          | intact | EBI-1135645 |
| Escherichia coli | association          | intact | EBI-1136132 |
| Escherichia coli | association          | intact | EBI-893792  |
| Escherichia coli | association          | intact | EBI-885725  |
| Escherichia coli | association          | intact | EBI-883848  |
| Escherichia coli | association          | intact | EBI-887858  |
| Escherichia coli | association          | intact | EBI-1144769 |
| Escherichia coli | association          | intact | EBI-893588  |
| Escherichia coli | association          | intact | EBI-891549  |
| Escherichia coli | association          | intact | EBI-895275  |
| Escherichia coli | association          | intact | EBI-1140602 |
| Escherichia coli | association          | intact | EBI-1146467 |
| Escherichia coli | association          | intact | EBI-1139739 |
| Escherichia coli | association          | intact | EBI-1141819 |
| Escherichia coli | association          | intact | EBI-1139431 |
| Escherichia coli | association          | intact | EBI-1147342 |
| Escherichia coli | association          | intact | EBI-1135444 |
| Escherichia coli | association          | intact | EBI-1136726 |
| Escherichia coli | association          | intact | EBI-1137861 |
| Escherichia coli | association          | intact | EBI-883047  |
| Escherichia coli | association          | intact | EBI-1135438 |
| Escherichia coli | association          | intact | EBI-1141036 |
| Escherichia coli | association          | intact | EBI-1145928 |
| Escherichia coli | association          | intact | EBI-1147655 |
| Escherichia coli | association          | intact | EBI-1145192 |
| Escherichia coli | association          | intact | EBI-1147801 |

|                  |             |        |             |
|------------------|-------------|--------|-------------|
| Escherichia coli | association | intact | EBI-1135913 |
| Escherichia coli | association | intact | EBI-1136744 |
| Escherichia coli | association | intact | EBI-1138059 |
| Escherichia coli | association | intact | EBI-1138389 |
| Escherichia coli | association | intact | EBI-1139824 |
| Escherichia coli | association | intact | EBI-1139997 |
| Escherichia coli | association | intact | EBI-1143389 |
| Escherichia coli | association | intact | EBI-1146499 |
| Escherichia coli | association | intact | EBI-1139043 |

|                  |                      |        |             |
|------------------|----------------------|--------|-------------|
| Escherichia coli | association          | intact | EBI-894882  |
| Escherichia coli | physical association | intact | EBI-1771504 |
| Escherichia coli | association          | intact | EBI-1144187 |
| Escherichia coli | association          | intact | EBI-892986  |

|                  |             |        |             |
|------------------|-------------|--------|-------------|
| Escherichia coli | association | intact | EBI-1140456 |
|------------------|-------------|--------|-------------|

|                  |                      |        |             |
|------------------|----------------------|--------|-------------|
| Escherichia coli | association          | intact | EBI-1140641 |
| Escherichia coli | association          | intact | EBI-1139971 |
| Escherichia coli | association          | intact | EBI-1142864 |
| Escherichia coli | association          | intact | EBI-1138845 |
| Escherichia coli | association          | intact | EBI-1143426 |
| Escherichia coli | association          | intact | EBI-1136388 |
| Escherichia coli | association          | intact | EBI-1140107 |
| Escherichia coli | physical association | intact | EBI-1144327 |

|                  |             |        |             |
|------------------|-------------|--------|-------------|
| Escherichia coli | association | intact | EBI-1136995 |
| Escherichia coli | association | intact | EBI-1145978 |
| Escherichia coli | association | intact | EBI-1144013 |
| Escherichia coli | association | intact | EBI-369356  |

|                  |             |        |             |
|------------------|-------------|--------|-------------|
| Escherichia coli | association | intact | EBI-1146265 |
| Escherichia coli | association | intact | EBI-1142794 |
| Escherichia coli | association | intact | EBI-1140807 |

|                  |             |        |             |
|------------------|-------------|--------|-------------|
| Escherichia coli | association | intact | EBI-879539  |
| Escherichia coli | association | intact | EBI-1143120 |
| Escherichia coli | association | intact | EBI-1142639 |

|                  |             |        |             |
|------------------|-------------|--------|-------------|
| Escherichia coli | association | intact | EBI-1144499 |
| Escherichia coli | association | intact | EBI-880595  |
| Escherichia coli | association | intact | EBI-889228  |
| Escherichia coli | association | intact | EBI-883997  |
| Escherichia coli | association | intact | EBI-888366  |

|                  |             |        |             |
|------------------|-------------|--------|-------------|
| Escherichia coli | association | intact | EBI-2463360 |
| Escherichia coli | association | intact | EBI-1143609 |

|                  |             |        |             |
|------------------|-------------|--------|-------------|
| Escherichia coli | association | intact | EBI-1140216 |
| Escherichia coli | association | intact | EBI-1146365 |
| Escherichia coli | association | intact | EBI-1136749 |
| Escherichia coli | association | intact | EBI-1135782 |
| Escherichia coli | association | intact | EBI-1143374 |
| Escherichia coli | association | intact | EBI-1135898 |
| Escherichia coli | association | intact | EBI-1139235 |
| Escherichia coli | association | intact | EBI-1139450 |
| Escherichia coli | association | intact | EBI-1142099 |

|                  |             |        |            |
|------------------|-------------|--------|------------|
| Escherichia coli | association | intact | EBI-893792 |
|------------------|-------------|--------|------------|

|                  |                      |        |             |
|------------------|----------------------|--------|-------------|
| Escherichia coli | association          | intact | EBI-885556  |
| Escherichia coli | association          | intact | EBI-892166  |
| Escherichia coli | physical association | intact | EBI-1771031 |
| Escherichia coli | association          | intact | EBI-1136626 |
| Escherichia coli | association          | intact | EBI-1136151 |
| Escherichia coli | association          | intact | EBI-887293  |

|                  |                      |        |             |
|------------------|----------------------|--------|-------------|
| Escherichia coli | physical association | intact | EBI-2369468 |
| Escherichia coli | association          | intact | EBI-1140223 |
| Escherichia coli | association          | intact | EBI-887634  |
| Escherichia coli | association          | intact | EBI-880595  |
| Escherichia coli | association          | intact | EBI-890481  |
| Escherichia coli | association          | intact | EBI-891896  |
| Escherichia coli | association          | intact | EBI-889390  |
| Escherichia coli | association          | intact | EBI-894403  |
| Escherichia coli | association          | intact | EBI-889676  |
| Escherichia coli | association          | intact | EBI-894628  |
| Escherichia coli | physical association | intact | EBI-2369443 |
| Escherichia coli | physical association | intact | EBI-2463599 |
| Escherichia coli | association          | intact | EBI-1138116 |
| Escherichia coli | association          | intact | EBI-1142480 |
| Escherichia coli | association          | intact | EBI-880319  |
| Escherichia coli | association          | intact | EBI-885650  |
| Escherichia coli | physical association | intact | EBI-1146635 |
| Escherichia coli | association          | intact | EBI-879161  |
| Escherichia coli | physical association | intact | EBI-2463592 |
| Escherichia coli | association          | intact | EBI-1144798 |
| Escherichia coli | association          | intact | EBI-890196  |
| Escherichia coli | association          | intact | EBI-893218  |
| Escherichia coli | association          | intact | EBI-887063  |

|                     |                      |        |             |
|---------------------|----------------------|--------|-------------|
| Escherichia coli O6 | physical association | intact | EBI-1770978 |
| Escherichia coli    | association          | intact | EBI-1141522 |
| Escherichia coli    | association          | intact | EBI-880828  |
| Escherichia coli    | association          | intact | EBI-1142385 |
| Escherichia coli    | association          | intact | EBI-1144562 |
| Escherichia coli    | association          | intact | EBI-1142406 |
| Escherichia coli    | association          | intact | EBI-890346  |
| Escherichia coli    | physical association | intact | EBI-1136381 |
| Escherichia coli    | association          | intact | EBI-371377  |
| Escherichia coli    | association          | intact | EBI-1135792 |

|                  |             |        |            |
|------------------|-------------|--------|------------|
| Escherichia coli | association | intact | EBI-892681 |
|------------------|-------------|--------|------------|

|                  |                      |        |             |
|------------------|----------------------|--------|-------------|
| Escherichia coli | association          | intact | EBI-1140933 |
| Escherichia coli | physical association | intact | EBI-2369605 |
| Escherichia coli | association          | intact | EBI-1141898 |
| Escherichia coli | association          | intact | EBI-1135754 |
| Escherichia coli | association          | intact | EBI-880166  |
| Escherichia coli | association          | intact | EBI-885330  |
| Escherichia coli | association          | intact | EBI-885243  |
| Escherichia coli | association          | intact | EBI-1137559 |
| Escherichia coli | association          | intact | EBI-1138503 |
| Escherichia coli | association          | intact | EBI-1147874 |
| Escherichia coli | association          | intact | EBI-1141045 |
| Escherichia coli | physical association | intact | EBI-2369596 |
| Escherichia coli | association          | intact | EBI-882208  |
| Escherichia coli | association          | intact | EBI-1140323 |
| Escherichia coli | association          | intact | EBI-888507  |
| Escherichia coli | association          | intact | EBI-881230  |
| Escherichia coli | association          | intact | EBI-1145382 |
| Escherichia coli | association          | intact | EBI-1144861 |
| Escherichia coli | association          | intact | EBI-2463360 |
| Escherichia coli | association          | intact | EBI-1139350 |
| Escherichia coli | association          | intact | EBI-1136885 |
| Escherichia coli | association          | intact | EBI-1137548 |
| Escherichia coli | physical association | intact | EBI-891340  |
| Escherichia coli | association          | intact | EBI-892581  |
| Escherichia coli | physical association | intact | EBI-888971  |
| Escherichia coli | physical association | intact | EBI-1138083 |
| Escherichia coli | association          | intact | EBI-1138875 |
| Escherichia coli | association          | intact | EBI-1139510 |
| Escherichia coli | association          | intact | EBI-1141940 |
| Escherichia coli | association          | intact | EBI-369356  |

|                  |                      |        |             |
|------------------|----------------------|--------|-------------|
| Escherichia coli | association          | intact | EBI-1147561 |
| Escherichia coli | physical association | intact | EBI-1147757 |
| Escherichia coli | physical association | intact | EBI-2370522 |
| Escherichia coli | association          | intact | EBI-1145908 |
| Escherichia coli | association          | intact | EBI-880676  |
| Escherichia coli | association          | intact | EBI-1137548 |
| Escherichia coli | association          | intact | EBI-1137454 |
| Escherichia coli | association          | intact | EBI-1146308 |
| Escherichia coli | association          | intact | EBI-1138286 |
| Escherichia coli | association          | intact | EBI-1138688 |
| Escherichia coli | direct interaction   | intact | EBI-1029844 |
| Escherichia coli | association          | intact | EBI-1138667 |
| Escherichia coli | association          | intact | EBI-892312  |
| Escherichia coli | physical association | intact | EBI-893352  |
| Escherichia coli | physical association | intact | EBI-884404  |
| Escherichia coli | association          | intact | EBI-1143332 |
| Escherichia coli | association          | intact | EBI-1147760 |
| Escherichia coli | association          | intact | EBI-1142869 |
| Escherichia coli | association          | intact | EBI-1147770 |
| Escherichia coli | association          | intact | EBI-1140965 |
| Escherichia coli | association          | intact | EBI-1147040 |
| Escherichia coli | association          | intact | EBI-882464  |
| Escherichia coli | association          | intact | EBI-1146741 |
| Escherichia coli | association          | intact | EBI-369356  |
| Escherichia coli | association          | intact | EBI-1135754 |
| Escherichia coli | association          | intact | EBI-1145628 |
| Escherichia coli | association          | intact | EBI-891722  |

|                  |                      |        |             |
|------------------|----------------------|--------|-------------|
| Escherichia coli | association          | intact | EBI-1142416 |
| Escherichia coli | physical association | intact | EBI-883708  |
| Escherichia coli | association          | intact | EBI-885106  |
| Escherichia coli | association          | intact | EBI-893117  |
| Escherichia coli | association          | intact | EBI-895127  |
| Escherichia coli | association          | intact | EBI-1147040 |
| Escherichia coli | association          | intact | EBI-1138207 |
| Escherichia coli | physical association | intact | EBI-1138204 |
| Escherichia coli | physical association | intact | EBI-2011448 |
| Escherichia coli | association          | intact | EBI-1141152 |
| Escherichia coli | association          | intact | EBI-1140667 |
| Escherichia coli | association          | intact | EBI-1140146 |
| Escherichia coli | association          | intact | EBI-1140933 |
| Escherichia coli | association          | intact | EBI-1137461 |
| Escherichia coli | association          | intact | EBI-1138538 |
| Escherichia coli | association          | intact | EBI-1140130 |
| Escherichia coli | association          | intact | EBI-1136666 |
| Escherichia coli | association          | intact | EBI-1135704 |
| Escherichia coli | association          | intact | EBI-894882  |
| Escherichia coli | association          | intact | EBI-1137295 |
| Escherichia coli | association          | intact | EBI-1140692 |
| Escherichia coli | association          | intact | EBI-1141433 |
| Escherichia coli | association          | intact | EBI-1135563 |
| Escherichia coli | association          | intact | EBI-1138177 |
| Escherichia coli | association          | intact | EBI-1140294 |
| Escherichia coli | association          | intact | EBI-1147620 |
| Escherichia coli | association          | intact | EBI-1136343 |
| Escherichia coli | association          | intact | EBI-885106  |
| Escherichia coli | association          | intact | EBI-1135833 |
| Escherichia coli | association          | intact | EBI-893751  |
| Escherichia coli | association          | intact | EBI-1135548 |
| Escherichia coli | association          | intact | EBI-1138921 |
| Escherichia coli | association          | intact | EBI-1141105 |
| Escherichia coli | association          | intact | EBI-1138406 |

|                  |                      |        |             |
|------------------|----------------------|--------|-------------|
| Escherichia coli | association          | intact | EBI-1138191 |
| Escherichia coli | association          | intact | EBI-1138439 |
| Escherichia coli | association          | intact | EBI-895127  |
| Escherichia coli | association          | intact | EBI-1135919 |
| Escherichia coli | association          | intact | EBI-1146286 |
| Escherichia coli | association          | intact | EBI-1146274 |
| Escherichia coli | physical association | intact | EBI-1146678 |
| Escherichia coli | association          | intact | EBI-1138150 |
| Escherichia coli | association          | intact | EBI-1145550 |
| Escherichia coli | association          | intact | EBI-1138798 |
| Escherichia coli | association          | intact | EBI-1137410 |
| Escherichia coli | association          | intact | EBI-1140230 |
| Escherichia coli | association          | intact | EBI-1138623 |
| Escherichia coli | association          | intact | EBI-1135645 |
| Escherichia coli | association          | intact | EBI-1138427 |
| Escherichia coli | association          | intact | EBI-1137846 |
| Escherichia coli | association          | intact | EBI-1140290 |
| Escherichia coli | association          | intact | EBI-882523  |
| Escherichia coli | association          | intact | EBI-1135630 |
| Escherichia coli | association          | intact | EBI-1136035 |
| Escherichia coli | association          | intact | EBI-1138657 |
| Escherichia coli | association          | intact | EBI-1138650 |
| Escherichia coli | association          | intact | EBI-1138667 |
| Escherichia coli | association          | intact | EBI-1138675 |
| Escherichia coli | association          | intact | EBI-1139729 |
| Escherichia coli | association          | intact | EBI-1141314 |
| Escherichia coli | association          | intact | EBI-1142588 |
| Escherichia coli | association          | intact | EBI-1143031 |
| Escherichia coli | association          | intact | EBI-1144996 |
| Escherichia coli | association          | intact | EBI-1138467 |
| Escherichia coli | association          | intact | EBI-1136918 |
| Escherichia coli | association          | intact | EBI-1140414 |
| Escherichia coli | association          | intact | EBI-1146192 |
| Escherichia coli | association          | intact | EBI-1146254 |
| Escherichia coli | association          | intact | EBI-1137002 |
| Escherichia coli | association          | intact | EBI-1145035 |
| Escherichia coli | physical association | intact | EBI-1147140 |
| Escherichia coli | physical association | intact | EBI-1144074 |
| Escherichia coli | association          | intact | EBI-880166  |
| Escherichia coli | association          | intact | EBI-1145112 |
| Escherichia coli | association          | intact | EBI-893117  |
| Escherichia coli | association          | intact | EBI-2463360 |



|                  |                      |        |             |
|------------------|----------------------|--------|-------------|
| Escherichia coli | association          | intact | EBI-1142937 |
| Escherichia coli | association          | intact | EBI-883484  |
| Escherichia coli | association          | intact | EBI-1144449 |
| Escherichia coli | association          | intact | EBI-1144430 |
| Escherichia coli | association          | intact | EBI-1136117 |
| Escherichia coli | association          | intact | EBI-1135996 |
| Escherichia coli | association          | intact | EBI-895275  |
| Escherichia coli | physical association | intact | EBI-893831  |
| Escherichia coli | association          | intact | EBI-1147454 |
| Escherichia coli | association          | intact | EBI-1144499 |
| Escherichia coli | association          | intact | EBI-1136828 |
| Escherichia coli | physical association | intact | EBI-1214184 |
| Escherichia coli | association          | intact | EBI-1141247 |
| Escherichia coli | association          | intact | EBI-885024  |
| Escherichia coli | association          | intact | EBI-1140922 |
| Escherichia coli | association          | intact | EBI-1145919 |
| Escherichia coli | association          | intact | EBI-1136095 |
| Escherichia coli | association          | intact | EBI-894652  |
| Escherichia coli | physical association | intact | EBI-907290  |
| Escherichia coli | association          | intact | EBI-891576  |

|                  |                      |        |             |
|------------------|----------------------|--------|-------------|
| Escherichia coli | association          | intact | EBI-894724  |
| Escherichia coli | association          | intact | EBI-1144218 |
| Escherichia coli | physical association | intact | EBI-1213288 |
| Escherichia coli | physical association | intact | EBI-892385  |
| Escherichia coli | association          | intact | EBI-892823  |
| Escherichia coli | association          | intact | EBI-885881  |
| Escherichia coli | association          | intact | EBI-369356  |
| Escherichia coli | association          | intact | EBI-371168  |
| Escherichia coli | association          | intact | EBI-878757  |
| Escherichia coli | association          | intact | EBI-1136229 |
| Escherichia coli | association          | intact | EBI-1145762 |
| Escherichia coli | association          | intact | EBI-1145744 |
| Escherichia coli | association          | intact | EBI-1138552 |
| Escherichia coli | association          | intact | EBI-1140020 |
| Escherichia coli | association          | intact | EBI-1144154 |
| Escherichia coli | association          | intact | EBI-894882  |
| Escherichia coli | association          | intact | EBI-893751  |
| Escherichia coli | association          | intact | EBI-369356  |
| Escherichia coli | association          | intact | EBI-371168  |
| Escherichia coli | association          | intact | EBI-882138  |
| Escherichia coli | physical association | intact | EBI-852881  |
| Escherichia coli | physical association | intact | EBI-852886  |
| Escherichia coli | association          | intact | EBI-852941  |
| Escherichia coli | association          | intact | EBI-878935  |
| Escherichia coli | physical association | intact | EBI-861789  |
| Escherichia coli | association          | intact | EBI-1143426 |
| Escherichia coli | association          | intact | EBI-886815  |

|                  |             |        |             |
|------------------|-------------|--------|-------------|
| Escherichia coli | association | intact | EBI-878935  |
| Escherichia coli | association | intact | EBI-1146244 |
| Escherichia coli | association | intact | EBI-1143271 |
| Escherichia coli | association | intact | EBI-1137610 |
| Escherichia coli | association | intact | EBI-1138046 |
| Escherichia coli | association | intact | EBI-1145055 |
| Escherichia coli | association | intact | EBI-1144996 |
| Escherichia coli | association | intact | EBI-1137983 |
| Escherichia coli | association | intact | EBI-1142334 |
| Escherichia coli | association | intact | EBI-1139876 |
| Escherichia coli | association | intact | EBI-1144077 |
| Escherichia coli | association | intact | EBI-1144822 |
| Escherichia coli | association | intact | EBI-1145597 |
| Escherichia coli | association | intact | EBI-1142947 |
| Escherichia coli | association | intact | EBI-882671  |
| Escherichia coli | association | intact | EBI-884306  |
| Escherichia coli | association | intact | EBI-881177  |
| Escherichia coli | association | intact | EBI-1143426 |
| Escherichia coli | association | intact | EBI-880477  |
| Escherichia coli | association | intact | EBI-878894  |
| Escherichia coli | association | intact | EBI-1146090 |
| Escherichia coli | association | intact | EBI-1142999 |
| Escherichia coli | association | intact | EBI-882920  |
| Escherichia coli | association | intact | EBI-1146303 |
| Escherichia coli | association | intact | EBI-1136374 |
| Escherichia coli | association | intact | EBI-1146475 |
| Escherichia coli | association | intact | EBI-1146826 |
| Escherichia coli | association | intact | EBI-1142979 |

|                  |             |        |             |
|------------------|-------------|--------|-------------|
| Escherichia coli | association | intact | EBI-1143003 |
| Escherichia coli | association | intact | EBI-1140172 |
| Escherichia coli | association | intact | EBI-1142127 |

|                  |             |        |            |
|------------------|-------------|--------|------------|
| Escherichia coli | association | intact | EBI-893552 |
|------------------|-------------|--------|------------|

|                  |             |        |             |
|------------------|-------------|--------|-------------|
| Escherichia coli | association | intact | EBI-1138515 |
|------------------|-------------|--------|-------------|

|                  |                      |        |             |
|------------------|----------------------|--------|-------------|
| Escherichia coli | physical association | intact | EBI-1143847 |
|------------------|----------------------|--------|-------------|

|                  |             |        |             |
|------------------|-------------|--------|-------------|
| Escherichia coli | association | intact | EBI-889090  |
| Escherichia coli | association | intact | EBI-1138911 |

|                  |             |        |             |
|------------------|-------------|--------|-------------|
| Escherichia coli | association | intact | EBI-1140146 |
|------------------|-------------|--------|-------------|

|                  |             |        |             |
|------------------|-------------|--------|-------------|
| Escherichia coli | association | intact | EBI-1145657 |
|------------------|-------------|--------|-------------|

|                  |             |        |            |
|------------------|-------------|--------|------------|
| Escherichia coli | association | intact | EBI-884189 |
| Escherichia coli | association | intact | EBI-883980 |
| Escherichia coli | association | intact | EBI-894927 |

|                  |                      |        |            |
|------------------|----------------------|--------|------------|
| Escherichia coli | association          | intact | EBI-891254 |
| Escherichia coli | association          | intact | EBI-894041 |
| Escherichia coli | association          | intact | EBI-894085 |
| Escherichia coli | association          | intact | EBI-890083 |
| Escherichia coli | association          | intact | EBI-885051 |
| Escherichia coli | association          | intact | EBI-892838 |
| Escherichia coli | association          | intact | EBI-886442 |
| Escherichia coli | association          | intact | EBI-891312 |
| Escherichia coli | association          | intact | EBI-892411 |
| Escherichia coli | physical association | intact | EBI-892816 |

|                  |             |        |             |
|------------------|-------------|--------|-------------|
| Escherichia coli | association | intact | EBI-890853  |
| Escherichia coli | association | intact | EBI-1140903 |

|                  |             |        |             |
|------------------|-------------|--------|-------------|
| Escherichia coli | association | intact | EBI-1140029 |
| Escherichia coli | association | intact | EBI-1146204 |

|                  |             |        |             |
|------------------|-------------|--------|-------------|
| Escherichia coli | association | intact | EBI-1138503 |
| Escherichia coli | association | intact | EBI-1140845 |

|                  |             |        |             |
|------------------|-------------|--------|-------------|
| Escherichia coli | association | intact | EBI-1147473 |
|------------------|-------------|--------|-------------|

|                  |             |        |            |
|------------------|-------------|--------|------------|
| Escherichia coli | association | intact | EBI-894882 |
|------------------|-------------|--------|------------|

|                  |             |        |            |
|------------------|-------------|--------|------------|
| Escherichia coli | association | intact | EBI-891481 |
| Escherichia coli | association | intact | EBI-890575 |
| Escherichia coli | association | intact | EBI-893751 |
| Escherichia coli | association | intact | EBI-889421 |

|                  |                      |        |             |
|------------------|----------------------|--------|-------------|
| Escherichia coli | association          | intact | EBI-1146094 |
| Escherichia coli | association          | intact | EBI-369356  |
| Escherichia coli | association          | intact | EBI-892187  |
| Escherichia coli | association          | intact | EBI-1139584 |
| Escherichia coli | association          | intact | EBI-1135423 |
| Escherichia coli | association          | intact | EBI-1142711 |
| Escherichia coli | association          | intact | EBI-1135444 |
| Escherichia coli | association          | intact | EBI-1145597 |
| Escherichia coli | association          | intact | EBI-883047  |
| Escherichia coli | association          | intact | EBI-885224  |
| Escherichia coli | association          | intact | EBI-1142024 |
| Escherichia coli | physical association | intact | EBI-1143999 |
| Escherichia coli | association          | intact | EBI-1144847 |
| Escherichia coli | association          | intact | EBI-1145805 |
| Escherichia coli | association          | intact | EBI-895127  |
| Escherichia coli | association          | intact | EBI-1140113 |
| Escherichia coli | association          | intact | EBI-895247  |
| Escherichia coli | association          | intact | EBI-1138463 |
| Escherichia coli | physical association | intact | EBI-892144  |
| Escherichia coli | association          | intact | EBI-1142354 |
| Escherichia coli | association          | intact | EBI-1145610 |
| Escherichia coli | association          | intact | EBI-1137618 |
| Escherichia coli | association          | intact | EBI-892010  |
| Escherichia coli | association          | intact | EBI-892741  |
| Escherichia coli | association          | intact | EBI-1147655 |

|                  |             |        |             |
|------------------|-------------|--------|-------------|
| Escherichia coli | association | intact | EBI-890426  |
| Escherichia coli | association | intact | EBI-893366  |
| Escherichia coli | association | intact | EBI-889160  |
| Escherichia coli | association | intact | EBI-892411  |
| Escherichia coli | association | intact | EBI-884764  |
| Escherichia coli | association | intact | EBI-1143684 |
| Escherichia coli | association | intact | EBI-1143817 |
| Escherichia coli | association | intact | EBI-1143926 |
| Escherichia coli | association | intact | EBI-1147760 |
| Escherichia coli | association | intact | EBI-1147442 |
| Escherichia coli | association | intact | EBI-1137072 |
| Escherichia coli | association | intact | EBI-1143317 |
| Escherichia coli | association | intact | EBI-1146712 |
| Escherichia coli | association | intact | EBI-1141314 |
| Escherichia coli | association | intact | EBI-1143572 |
| Escherichia coli | association | intact | EBI-1142768 |
| Escherichia coli | association | intact | EBI-1145298 |
| Escherichia coli | association | intact | EBI-887500  |
| Escherichia coli | association | intact | EBI-887757  |
| Escherichia coli | association | intact | EBI-895275  |

|                  |             |        |             |
|------------------|-------------|--------|-------------|
| Escherichia coli | association | intact | EBI-1143701 |
| Escherichia coli | association | intact | EBI-891481  |
| Escherichia coli | association | intact | EBI-879643  |
| Escherichia coli | association | intact | EBI-883767  |
| Escherichia coli | association | intact | EBI-888958  |
| Escherichia coli | association | intact | EBI-881486  |
| Escherichia coli | association | intact | EBI-890575  |
| Escherichia coli | association | intact | EBI-890677  |
| Escherichia coli | association | intact | EBI-888109  |
| Escherichia coli | association | intact | EBI-883047  |
| Escherichia coli | association | intact | EBI-880595  |
| Escherichia coli | association | intact | EBI-885243  |
| Escherichia coli | association | intact | EBI-884859  |
| Escherichia coli | association | intact | EBI-894739  |
| Escherichia coli | association | intact | EBI-888757  |
| Escherichia coli | association | intact | EBI-892599  |
| Escherichia coli | association | intact | EBI-881701  |
| Escherichia coli | association | intact | EBI-887500  |
| Escherichia coli | association | intact | EBI-890837  |
| Escherichia coli | association | intact | EBI-885898  |
| Escherichia coli | association | intact | EBI-887767  |
| Escherichia coli | association | intact | EBI-895127  |
| Escherichia coli | association | intact | EBI-886140  |
| Escherichia coli | association | intact | EBI-885288  |
| Escherichia coli | association | intact | EBI-892010  |
| Escherichia coli | association | intact | EBI-889536  |
| Escherichia coli | association | intact | EBI-882671  |
| Escherichia coli | association | intact | EBI-890236  |
| Escherichia coli | association | intact | EBI-893488  |
| Escherichia coli | association | intact | EBI-879914  |
| Escherichia coli | association | intact | EBI-883997  |
| Escherichia coli | association | intact | EBI-892437  |
| Escherichia coli | association | intact | EBI-885881  |
| Escherichia coli | association | intact | EBI-890918  |
| Escherichia coli | association | intact | EBI-883733  |
| Escherichia coli | association | intact | EBI-887918  |
| Escherichia coli | association | intact | EBI-885071  |
| Escherichia coli | association | intact | EBI-882920  |
| Escherichia coli | association | intact | EBI-886205  |
| Escherichia coli | association | intact | EBI-892692  |



|                          |                      |        |             |
|--------------------------|----------------------|--------|-------------|
| Escherichia coli         | association          | intact | EBI-2463360 |
| Escherichia coli         | association          | intact | EBI-882273  |
| Escherichia coli         | association          | intact | EBI-887152  |
| Escherichia coli         | association          | intact | EBI-878757  |
| Escherichia coli         | association          | intact | EBI-881754  |
| Escherichia coli         | association          | intact | EBI-881886  |
| Escherichia coli         | association          | intact | EBI-887431  |
| Escherichia coli O157:H7 | physical association | intact | EBI-1214184 |
| Escherichia coli         | physical association | intact | EBI-1142221 |
| Escherichia coli         | association          | intact | EBI-895036  |
| Escherichia coli         | association          | intact | EBI-1140564 |
| Escherichia coli         | association          | intact | EBI-1137604 |
| Escherichia coli         | association          | intact | EBI-894927  |
| Escherichia coli         | association          | intact | EBI-887888  |
| Escherichia coli         | association          | intact | EBI-1142565 |
| Escherichia coli         | association          | intact | EBI-1138943 |
| Escherichia coli         | association          | intact | EBI-1145504 |
| Escherichia coli         | association          | intact | EBI-1146116 |
| Escherichia coli         | association          | intact | EBI-1141140 |
| Escherichia coli         | association          | intact | EBI-1138471 |
| Escherichia coli         | association          | intact | EBI-1139991 |
| Escherichia coli         | association          | intact | EBI-1142134 |
| Escherichia coli         | association          | intact | EBI-1139852 |
| Escherichia coli         | association          | intact | EBI-1140619 |
| Escherichia coli         | association          | intact | EBI-882754  |
| Escherichia coli         | association          | intact | EBI-1144996 |
| Escherichia coli         | association          | intact | EBI-884632  |
| Escherichia coli         | association          | intact | EBI-1142581 |
| Escherichia coli         | association          | intact | EBI-1142650 |
| Escherichia coli         | association          | intact | EBI-894357  |

|                  |                      |        |             |
|------------------|----------------------|--------|-------------|
| Escherichia coli | association          | intact | EBI-1141314 |
| Escherichia coli | association          | intact | EBI-1143817 |
| Escherichia coli | association          | intact | EBI-1138046 |
| Escherichia coli | association          | intact | EBI-1147409 |
| Escherichia coli | association          | intact | EBI-1145063 |
| Escherichia coli | association          | intact | EBI-895275  |
| Escherichia coli | association          | intact | EBI-890534  |
| Escherichia coli | association          | intact | EBI-1142059 |
| Escherichia coli | association          | intact | EBI-1141189 |
| Escherichia coli | association          | intact | EBI-1141127 |
| Escherichia coli | association          | intact | EBI-1136726 |
| Escherichia coli | association          | intact | EBI-894012  |
| Escherichia coli | physical association | intact | EBI-1147767 |
| Escherichia coli | association          | intact | EBI-1139836 |
| Escherichia coli | association          | intact | EBI-1143500 |
| Escherichia coli | association          | intact | EBI-1146668 |
| Escherichia coli | physical association | intact | EBI-894868  |
| Escherichia coli | association          | intact | EBI-1142565 |
| Escherichia coli | association          | intact | EBI-1144410 |
| Escherichia coli | association          | intact | EBI-1146774 |

|                  |                      |        |             |
|------------------|----------------------|--------|-------------|
| Escherichia coli | association          | intact | EBI-1141970 |
| Escherichia coli | association          | intact | EBI-885524  |
| Escherichia coli | association          | intact | EBI-883577  |
| Escherichia coli | association          | intact | EBI-1138724 |
| Escherichia coli | association          | intact | EBI-880430  |
| Escherichia coli | association          | intact | EBI-1142543 |
| Escherichia coli | association          | intact | EBI-1144579 |
| Escherichia coli | association          | intact | EBI-1138562 |
| Escherichia coli | association          | intact | EBI-1145313 |
| Escherichia coli | association          | intact | EBI-1138605 |
| Escherichia coli | association          | intact | EBI-889499  |
| Escherichia coli | association          | intact | EBI-893805  |
| Escherichia coli | association          | intact | EBI-886481  |
| Escherichia coli | physical association | intact | EBI-891305  |
| Escherichia coli | association          | intact | EBI-894497  |
| Escherichia coli | association          | intact | EBI-880917  |
| Escherichia coli | association          | intact | EBI-883876  |
| Escherichia coli | association          | intact | EBI-888995  |
| Escherichia coli | association          | intact | EBI-891481  |

|                  |                      |        |             |
|------------------|----------------------|--------|-------------|
| Escherichia coli | association          | intact | EBI-890677  |
| Escherichia coli | physical association | intact | EBI-893265  |
| Escherichia coli | physical association | intact | EBI-887025  |
| Escherichia coli | association          | intact | EBI-883484  |
| Escherichia coli | association          | intact | EBI-894403  |
| Escherichia coli | association          | intact | EBI-893751  |
|                  |                      |        |             |
| Escherichia coli | association          | intact | EBI-882305  |
|                  |                      |        |             |
| Escherichia coli | association          | intact | EBI-371168  |
| Escherichia coli | association          | intact | EBI-1144536 |
|                  |                      |        |             |
| Escherichia coli | association          | intact | EBI-1137650 |
| Escherichia coli | association          | intact | EBI-881035  |
|                  |                      |        |             |
| Escherichia coli | association          | intact | EBI-1146620 |
| Escherichia coli | association          | intact | EBI-1142065 |
| Escherichia coli | association          | intact | EBI-1143317 |
| Escherichia coli | association          | intact | EBI-1136056 |
| Escherichia coli | association          | intact | EBI-889500  |
| Escherichia coli | association          | intact | EBI-1136155 |
|                  |                      |        |             |
| Escherichia coli | association          | intact | EBI-1144822 |
|                  |                      |        |             |
| Escherichia coli | association          | intact | EBI-1136818 |
| Escherichia coli | physical association | intact | EBI-1147965 |
| Escherichia coli | association          | intact | EBI-882671  |
| Escherichia coli | association          | intact | EBI-890236  |

|                  |                      |        |             |
|------------------|----------------------|--------|-------------|
| Escherichia coli | physical association | intact | EBI-907046  |
| Escherichia coli | association          | intact | EBI-894724  |
| Escherichia coli | association          | intact | EBI-1141533 |
| Escherichia coli | association          | intact | EBI-882523  |
| Escherichia coli | association          | intact | EBI-894076  |
| Escherichia coli | association          | intact | EBI-1143374 |
| Escherichia coli | association          | intact | EBI-1137495 |
| Escherichia coli | association          | intact | EBI-1142806 |
| Escherichia coli | association          | intact | EBI-1135754 |
| Escherichia coli | association          | intact | EBI-1136768 |
| Escherichia coli | association          | intact | EBI-1143641 |
| Escherichia coli | association          | intact | EBI-1146171 |
| Escherichia coli | association          | intact | EBI-1139824 |

|                  |                      |        |             |
|------------------|----------------------|--------|-------------|
| Escherichia coli | association          | intact | EBI-1144614 |
| Escherichia coli | physical association | intact | EBI-1145875 |
| Escherichia coli | association          | intact | EBI-1138371 |
| Escherichia coli | association          | intact | EBI-1138688 |
| Escherichia coli | association          | intact | EBI-1144212 |
| Escherichia coli | association          | intact | EBI-1136892 |

|                  |             |        |            |
|------------------|-------------|--------|------------|
| Escherichia coli | association | intact | EBI-886668 |
|------------------|-------------|--------|------------|

|                  |             |        |             |
|------------------|-------------|--------|-------------|
| Escherichia coli | association | intact | EBI-1142857 |
| Escherichia coli | association | intact | EBI-1137753 |
| Escherichia coli | association | intact | EBI-1139780 |

|                  |             |        |             |
|------------------|-------------|--------|-------------|
| Escherichia coli | association | intact | EBI-1147040 |
|------------------|-------------|--------|-------------|
