# Supplementary material
Source: PubMed Central journal article supplement (PMC5108054)
Supplement: NIHMS436991-supplement-S6_in_both_mid_log.pdf [file NIHMS436991-supplement-S6_in_both_mid_log.pdf]

|                            | log2ratio  | lowerCI  | upperCI  | quantified_peptides | log2ratio  |
|----------------------------|------------|----------|----------|---------------------|------------|
| <b>sp_P0A6X3_HFQ_ECOLI</b> | <b>4.5</b> | <b>5</b> | <b>4</b> | <b>7</b>            | <b>2.6</b> |

lowerCI upperCI quantified\_peptides

2

3.2

5

Protein hfq OS=Escherichia coli (strain K12) GN=hfq PE=1 SV=2 [MASS

;-11166]
