# Supplementary material
Source: PubMed Central journal article supplement (PMC5108054)
Supplement: NIHMS436991-supplement-S6_in_both_stat.pdf [file NIHMS436991-supplement-S6_in_both_stat.pdf]

| locus               | log2ratio | lowerCI | upperCI | quantified_peptides |
|---------------------|-----------|---------|---------|---------------------|
| sp_P21499_RNR_ECOLI | 3.3       | 2.9     | 3.8     | 15                  |
| sp_P0A6X3_HFQ_ECOLI | 2.3       | 1.8     | 2.8     | 5                   |

| log2ratio  | lowerCI    | upperCI    | quantified_peptides | description                                         |
|------------|------------|------------|---------------------|-----------------------------------------------------|
| <b>2</b>   | <b>1.3</b> | <b>2.8</b> | <b>6</b>            | <b>Ribonuclease R OS=Escherichia coli (strain</b>   |
| <b>2.6</b> | <b>2.1</b> | <b>3</b>   | <b>10</b>           | <b>Protein hfq OS=Escherichia coli (strain K12)</b> |

K12) GN=rnr PE=1 SV=2 [MASS=92109]

) GN=hfq PE=1 SV=2 [MASS=11166]
