# Supplementary material
Source: PubMed Central journal article supplement (PMC5108054)
Supplement: NIHMS436991-supplement-S6_mid_log_pH1_total.pdf [file NIHMS436991-supplement-S6_mid_log_pH1_total.pdf]

| locus                 | log2ratio | lowerCI | upperCI | quantified_description        |
|-----------------------|-----------|---------|---------|-------------------------------|
| sp_P0A6X3_HFQ_ECOLI   | 4.5       | 4       | 5       | 7 Protein hfq OS=Escheri      |
| sp_P0AG67_RS1_ECOLI   | 3.4       | 3.1     | 3.7     | 22 30S ribosomal protein S    |
| sp_P0A7V8_RS4_ECOLI   | 3.1       | 2.5     | 3.8     | 4 30S ribosomal protein S     |
| sp_P0A6P9_ENO_ECOLI   | 2.3       | 1.7     | 2.9     | 7 Enolase OS=Escherichia      |
| sp_P30850_RNB_ECOLI   | 2.2       | 1.5     | 3       | 3 Exoribonuclease 2 OS=E      |
| sp_P02359_RS7_ECOLI   | 2.1       | 1.5     | 2.7     | 6 30S ribosomal protein S     |
| sp_P0A7D4_PURA_ECOLI  | 2         | 1.4     | 2.5     | 9 Adenylosuccinate synth      |
| sp_P0A7L0_RL1_ECOLI   | 2         | 0.8     | 2.8     | 4 50S ribosomal protein L     |
| sp_P67910_HLDD_ECOLI  | 1.9       | 1.6     | 2.1     | 40 ADP-L-glycero-D-manno      |
| sp_P0A6X7_IHFA_ECOLI  | 1.8       | 0.9     | 2.6     | 2 Integration host factor :   |
| sp_P0A7X3_RS9_ECOLI   | 1.8       | -2.3    | 2.9     | 2 30S ribosomal protein S     |
| sp_P0ABD8_BCCP_ECOLI  | 1.5       | 0.9     | 2       | 7 Biotin carboxyl carrier p   |
| sp_P25665_METE_ECOLI  | 1.4       | 0.9     | 1.9     | 7 5-methyltetrahydropter      |
| sp_P0A7Z4_RPOA_ECOLI  | 1.1       | 0.8     | 1.4     | 15 DNA-directed RNA poly      |
| sp_P09373_PFLB_ECOLI  | 1         | 0.2     | 1.9     | 2 Formate acetyltransfera     |
| sp_P0A8R0_RRAA_ECOLI  | 1         | 0.5     | 1.6     | 4 Regulator of ribonuclea     |
| sp_P0A9K9_SLYD_ECOLI  | 1         | 0.6     | 1.4     | 8 FKBP-type peptidyl-pro      |
| sp_P30126_LEUD_ECOLI  | 1         | -0.1    | 2.2     | 2 3-isopropylmalate dehy      |
| sp_P36683_ACON2_ECOLI | 0.9       | 0.6     | 1.3     | 12 Aconitate hydratase 2 C    |
| sp_P64476_YDIH_ECOLI  | 0.9       | 0       | 1.9     | 2 Uncharacterized protei      |
| sp_P0ACF0_DBHA_ECOLI  | 0.7       | -0.3    | 1.6     | 2 DNA-binding protein H       |
| sp_P0A8J4_YBED_ECOLI  | 0.6       | -0.3    | 1.6     | 2 UPF0250 protein ybeD        |
| sp_P0ABK5_CYSK_ECOLI  | 0.5       | 0.2     | 0.7     | 33 Cysteine synthase A OS     |
| sp_P0ADE8_YGFZ_ECOLI  | 0.5       | -0.2    | 1.1     | 7 tRNA-modifying proteir      |
| sp_P0A8T7_RPOC_ECOLI  | 0.4       | 0.2     | 0.7     | 48 DNA-directed RNA poly      |
| sp_P0A8V2_RPOB_ECOLI  | 0.4       | 0.2     | 0.6     | 61 DNA-directed RNA poly      |
| sp_P0AFF6_NUSA_ECOLI  | 0.4       | -0.1    | 0.8     | 7 Transcription elongatio     |
| sp_P21889_SYD_ECOLI   | 0.4       | -0.5    | 1.2     | 2 Aspartyl-tRNA syntheta      |
| sp_P06989_HIS2_ECOLI  | 0.3       | -0.6    | 1.3     | 2 Histidine biosynthesis b    |
| sp_P0AEP3_GALU_ECOLI  | 0.3       | -0.6    | 1       | 8 UTP--glucose-1-phosph       |
| sp_P68066_GRCA_ECOLI  | 0.3       | -0.5    | 1.1     | 3 Autonomous glycy radi       |
| sp_P76539_YPEA_ECOLI  | 0.3       | -0.7    | 1.2     | 2 Acetyltransferase ypeA      |
| sp_P0A6A6_LEUC_ECOLI  | 0.2       | -0.5    | 1       | 4 3-isopropylmalate dehy      |
| sp_P0AE08_AHPC_ECOLI  | 0.2       | -0.8    | 1.1     | 2 Alkyl hydroperoxide rec     |
| sp_P0AEK4_FABI_ECOLI  | 0.1       | -0.3    | 0.6     | 11 Enoyl-[acyl-carrier-prot   |
| sp_P0ACF8_HNS_ECOLI   | 0         | -0.8    | 0.9     | 2 DNA-binding protein H-      |
| sp_P37188_PTKB_ECOLI  | 0         | -0.8    | 0.8     | 2 Galactitol-specific phos    |
| sp_P61889_MDH_ECOLI   | 0         | -0.6    | 0.5     | 6 Malate dehydrogenase        |
| sp_P0A6A3_ACKA_ECOLI  | -0.1      | -0.7    | 0.5     | 12 Acetate kinase OS=Esch     |
| sp_P22634_MURI_ECOLI  | -0.1      | -0.9    | 0.8     | 2 Glutamate racemase O'       |
| sp_P0A6H5_HSLU_ECOLI  | -0.2      | -1      | 0.6     | 4 ATP-dependent proteas       |
| sp_P0A6M8_EFG_ECOLI   | -0.3      | -0.7    | 0       | 17 Elongation factor G OS=    |
| sp_P69441_KAD_ECOLI   | -0.3      | -0.8    | 0.2     | 7 Adenylate kinase OS=Es      |
| sp_P69783_PTGA_ECOLI  | -0.3      | -1      | 0.3     | 3 Glucose-specific phosph     |
| sp_P05791_ILVD_ECOLI  | -0.4      | -1.1    | 0.4     | 2 Dihydroxy-acid dehydra      |
| sp_P08660_AK3_ECOLI   | -0.4      | -0.8    | 0.1     | 8 Lysine-sensitive aspartc    |
| sp_P08839_PT1_ECOLI   | -0.4      | -0.8    | 0.1     | 12 Phosphoenolpyruvate- $\pi$ |

|                             |      |      |      |                             |
|-----------------------------|------|------|------|-----------------------------|
| sp_POAAB6_GALF_ECOLI        | -0.4 | -0.9 | 0    | 11 UTP--glucose-1-phosph    |
| sp_POAF08_MRP_ECOLI         | -0.4 | -1.3 | 0.6  | 2 Protein mrp OS=Escher     |
| sp_POAC69_GLRX4_ECOLI       | -0.5 | -1.4 | 0.4  | 2 Glutaredoxin-4 OS=Escl    |
| sp_P22106_ASNB_ECOLI        | -0.5 | -1.1 | 0    | 5 Asparagine synthetase     |
| sp_POA887_UBIE_ECOLI        | -0.6 | -1.5 | 0.3  | 3 Ubiquinone/menaquinc      |
| sp_P24186_FOLD_ECOLI        | -0.6 | -1.7 | 2.9  | 2 Bifunctional protein fol  |
| sp_P00934_THRC_ECOLI        | -0.7 | -0.9 | -0.4 | 31 Threonine synthase OS:   |
| sp_P02413_RL15_ECOLI        | -0.7 | -1.4 | 0.1  | 4 50S ribosomal protein L   |
| sp_POA7D7_PUR7_ECOLI        | -0.7 | -1.1 | -0.2 | 8 Phosphoribosylaminoin     |
| sp_POAEK2_FABG_ECOLI        | -0.7 | -1.8 | 0.3  | 2 3-oxoacyl-[acyl-carrier-  |
| sp_POAGK8_ISCR_ECOLI        | -0.7 | -1.2 | -0.2 | 9 HTH-type transcription:   |
| sp_P09053_AVTA_ECOLI        | -0.8 | -1.4 | -0.3 | 6 Valine--pyruvate amino    |
| sp_POAED0_USPA_ECOLI        | -0.8 | -1.3 | -0.4 | 10 Universal stress protein |
| sp_P23893_GSA_ECOLI         | -0.8 | -1.4 | -0.1 | 3 Glutamate-1-semialdeh     |
| sp_P33221_PURT_ECOLI        | -0.8 | -1.2 | -0.3 | 9 Phosphoribosylglycinan    |
| REVERSE_sp_P13809_RPI_ECOLI | -0.9 | -1.5 | -0.2 | 3 Reverse sequence, was     |
| sp_POA7E5_PYRG_ECOLI        | -0.9 | -1.6 | -0.2 | 4 CTP synthase OS=Esche     |
| sp_POA7J7_RL11_ECOLI        | -0.9 | -1.7 | -0.1 | 2 50S ribosomal protein L   |
| sp_POA9M2_HPRT_ECOLI        | -0.9 | -1.5 | -0.3 | 6 Hypoxanthine phospho      |
| sp_POAC41_DHSA_ECOLI        | -0.9 | -1.3 | -0.4 | 8 Succinate dehydrogena     |
| sp_P60595_HIS5_ECOLI        | -0.9 | -1.9 | 0.1  | 2 Imidazole glycerol phos   |
| sp_P00561_AK1H_ECOLI        | -1   | -1.2 | -0.8 | 39 Bifunctional aspartokin. |
| sp_P08244_PYRF_ECOLI        | -1   | -1.5 | -0.6 | 8 Orotidine 5'-phosphate    |
| sp_POA6N4_EFP_ECOLI         | -1   | -2.3 | 0.2  | 2 Elongation factor P OS=   |
| sp_POA734_MINE_ECOLI        | -1   | -2   | -0.1 | 2 Cell division topological |
| sp_POA8F0_UPP_ECOLI         | -1   | -1.3 | -0.7 | 22 Uracil phosphoribosyltr  |
| sp_POAB80_ILVE_ECOLI        | -1   | -1.9 | 0    | 2 Branched-chain-amino-     |
| sp_P37903_USPF_ECOLI        | -1   | -1.6 | -0.3 | 3 Universal stress protein  |
| sp_POA7R5_RS10_ECOLI        | -1.1 | -1.5 | -0.6 | 8 30S ribosomal protein S   |
| sp_P00547_KHSE_ECOLI        | -1.2 | -1.9 | -0.6 | 3 Homoserine kinase OS=     |
| sp_P00961_SYGB_ECOLI        | -1.2 | -1.5 | -0.8 | 15 Glycyl-tRNA synthetase   |
| sp_POA6Z1_HSCA_ECOLI        | -1.2 | -1.6 | -0.8 | 8 Chaperone protein hsc/    |
| sp_POA9Q1_ARCA_ECOLI        | -1.2 | -1.7 | -0.6 | 9 Aerobic respiration con   |
| sp_P24182_ACCC_ECOLI        | -1.2 | -2   | -0.4 | 3 Biotin carboxylase OS=f   |
| sp_P36680_YACF_ECOLI        | -1.2 | -1.8 | -0.6 | 6 UPF0289 protein yacF C    |
| sp_P09151_LEU1_ECOLI        | -1.3 | -1.8 | -0.7 | 8 2-isopropylmalate syntl   |
| sp_POA749_MURA_ECOLI        | -1.3 | -1.7 | -0.9 | 11 UDP-N-acetylglucosami    |
| sp_POA953_FABB_ECOLI        | -1.3 | -2.1 | -0.5 | 3 3-oxoacyl-[acyl-carrier-  |
| sp_POAGG0_THIL_ECOLI        | -1.3 | -1.9 | -0.7 | 4 Thiamine-monophosph       |
| sp_P23538_PPSA_ECOLI        | -1.3 | -1.6 | -1   | 20 Phosphoenolpyruvate s    |
| sp_P24203_YJIA_ECOLI        | -1.4 | -2.2 | -0.7 | 3 Uncharacterized GTP-bi    |
| sp_P77364_GLXK1_ECOLI       | -1.4 | -2.1 | -0.7 | 3 Glycerate kinase 1 OS=f   |
| sp_POA6H1_CLPX_ECOLI        | -1.5 | -2   | -1   | 8 ATP-dependent Clp pro     |
| sp_POA9B2_G3P1_ECOLI        | -1.5 | -2.2 | -0.9 | 4 Glyceraldehyde-3-phos     |
| sp_P07639_AROB_ECOLI        | -1.6 | -2.1 | -1.2 | 9 3-dehydroquinat syntl     |
| sp_POA9X4_MREB_ECOLI        | -1.6 | -2.1 | -1.1 | 11 Rod shape-determining    |
| sp_POAAB8_USPD_ECOLI        | -1.6 | -2.5 | -0.9 | 4 Universal stress protein  |
| sp_POAEZ1_METF_ECOLI        | -1.6 | -1.9 | -1.3 | 20 5,10-methylenetetrahy    |

|                      |      |      |      |                                                      |
|----------------------|------|------|------|------------------------------------------------------|
| sp_P24193_HYPE_ECOLI | -1.6 | -2.9 | -0.2 | 2 Hydrogenase isoenzyme                              |
| sp_P27833_RFFA_ECOLI | -1.6 | -2.6 | -0.6 | 2 Lipopolysaccharide biosynthesis                    |
| sp_P37440_UCPA_ECOLI | -1.6 | -2.3 | -1   | 5 Oxidoreductase ucpA O                              |
| sp_P69407_RCSB_ECOLI | -1.6 | -2.1 | -1.2 | 8 Capsular synthesis regulator                       |
| sp_P76423_THIM_ECOLI | -1.6 | -2.2 | -1   | 6 Hydroxyethylthiazole kinase                        |
| sp_P05852_GCP_ECOLI  | -1.7 | -7   | -0.5 | 3 Probable O-sialoglycoproteinase                    |
| sp_P0A825_GLYA_ECOLI | -1.7 | -2.1 | -1.3 | 9 Serine hydroxymethyltransferase                    |
| sp_P0A9Q9_DHAS_ECOLI | -1.7 | -2.7 | 3.5  | 4 Aspartate-semialdehyde dehydrogenase               |
| sp_P32132_TYPA_ECOLI | -1.7 | -2   | -1.5 | 21 GTP-binding protein tyf                           |
| sp_P0A6E1_AROL_ECOLI | -1.8 | -7   | -0.7 | 2 Shikimate kinase 2 OS=Escherichia coli             |
| sp_P0A817_METK_ECOLI | -1.8 | -2.2 | -1.4 | 12 S-adenosylmethionine synthetase                   |
| sp_P0AAI5_FABF_ECOLI | -1.8 | -2.3 | -1.2 | 4 3-oxoacyl-[acyl-carrier-protein] synthase 3        |
| sp_P0AAV4_YBGJ_ECOLI | -1.8 | -2.5 | -1.1 | 3 Uncharacterized protein                            |
| sp_P16659_SYP_ECOLI  | -1.8 | -2.1 | -1.5 | 17 Prolyl-tRNA synthetase                            |
| sp_P31677_OTSA_ECOLI | -1.8 | -2.7 | -1   | 3 Alpha,alpha-trehalose synthase                     |
| sp_P76658_HLDE_ECOLI | -1.8 | -2.1 | -1.5 | 33 Bifunctional protein hld                          |
| sp_P0A6F1_CARA_ECOLI | -1.9 | -2.3 | -1.5 | 9 Carbamoyl-phosphate synthase                       |
| sp_P0A720_KTHY_ECOLI | -1.9 | -3.1 | -0.9 | 2 Thymidylate kinase OS=Escherichia coli             |
| sp_P0A9W3_YJKK_ECOLI | -1.9 | -2.4 | -1.3 | 7 Uncharacterized ABC transporter                    |
| sp_P0AFG0_NUSG_ECOLI | -1.9 | -2.5 | -1.4 | 4 Transcription antitermination factor               |
| sp_P16456_SELD_ECOLI | -1.9 | -2.3 | -1.6 | 10 Selenide, water dikinase                          |
| sp_P08390_USG_ECOLI  | -2   | -2.8 | -1.2 | 2 USG-1 protein OS=Escherichia coli                  |
| sp_P00895_TRPE_ECOLI | -2.1 | -2.9 | -1.3 | 2 Anthranilate synthase component 2                  |
| sp_P08142_ILVB_ECOLI | -2.1 | -2.4 | -1.9 | 26 Acetolactate synthase i                           |
| sp_P0A6F5_CH60_ECOLI | -2.1 | -2.4 | -1.7 | 11 60 kDa chaperonin OS=Escherichia coli             |
| sp_P0ABB0_ATPA_ECOLI | -2.1 | -2.7 | -1.4 | 5 ATP synthase subunit alpha                         |
| sp_P0AGA6_UHPA_ECOLI | -2.1 | -2.9 | -1.3 | 2 Transcriptional regulator                          |
| sp_P10371_HIS4_ECOLI | -2.1 | -2.5 | -1.8 | 19 1-(5-phosphoribosyl)-5-phosphoribosyl transferase |
| sp_P62620_ISPG_ECOLI | -2.1 | -2.4 | -1.8 | 17 4-hydroxy-3-methylbutyrate dehydrogenase          |
| sp_P00968_CARB_ECOLI | -2.2 | -2.4 | -2   | 62 Carbamoyl-phosphate synthase                      |
| sp_P08178_PUR5_ECOLI | -2.2 | -2.6 | -1.8 | 9 Phosphoribosylformylglycinamido transferase        |
| sp_P0AEI4_RIMO_ECOLI | -2.2 | -2.9 | -1.6 | 4 Ribosomal protein S12                              |
| sp_P0AF24_NAGD_ECOLI | -2.2 | -2.5 | -1.9 | 14 Protein nagD OS=Escherichia coli                  |
| sp_P23909_MUTS_ECOLI | -2.2 | -2.7 | -1.7 | 7 DNA mismatch repair protein                        |
| sp_P60757_HIS1_ECOLI | -2.2 | -2.6 | -1.8 | 8 ATP phosphoribosyltransferase                      |
| sp_P10121_FTSY_ECOLI | -2.3 | -3.2 | -1.1 | 6 Cell division protein ftsY                         |
| sp_P60785_LEPA_ECOLI | -2.3 | -2.7 | -2   | 11 GTP-binding protein lep                           |
| sp_P0A7G6_RECA_ECOLI | -2.4 | -2.8 | -1.9 | 14 Protein recA OS=Escherichia coli                  |
| sp_P0A8S1_ICIA_ECOLI | -2.4 | -2.9 | -1.8 | 7 Chromosome initiation                              |
| sp_P0AG14_SOHB_ECOLI | -2.4 | -7   | -1.2 | 2 Probable protease sohE                             |
| sp_P0A6B7_ISCS_ECOLI | -2.5 | -2.9 | -2.1 | 25 Cysteine desulfurase O                            |
| sp_P0A9A6_FTSZ_ECOLI | -2.5 | -2.8 | -2.2 | 28 Cell division protein ftsZ                        |
| sp_P0A9B6_E4PD_ECOLI | -2.5 | -4.9 | -1.5 | 3 D-erythrose-4-phosphate dehydrogenase              |
| sp_P30137_THIE_ECOLI | -2.5 | -2.9 | -2   | 8 Thiamine-phosphate pyrophosphorylase               |
| sp_P37351_RPIB_ECOLI | -2.5 | -3.5 | -1.6 | 2 Ribose-5-phosphate isomerase                       |
| sp_P00960_SYGA_ECOLI | -2.6 | -3.3 | -2   | 6 Glycyl-tRNA synthetase                             |
| sp_P0A9Q7_ADHE_ECOLI | -2.6 | -3.3 | -1.9 | 4 Aldehyde-alcohol dehydrogenase                     |
| sp_P0AED5_UVRY_ECOLI | -2.7 | -3.5 | -1.9 | 2 Response regulator uvr                             |

|                      |      |      |      |                             |
|----------------------|------|------|------|-----------------------------|
| sp_P13009_METH_ECOLI | -2.7 | -3   | -2.3 | 22 Methionine synthase O    |
| sp_P00894_ILVH_ECOLI | -2.8 | -3.2 | -2.4 | 10 Acetolactate synthase i  |
| sp_P30139_THIG_ECOLI | -2.8 | -3.3 | -2.4 | 8 Thiazole synthase OS=E    |
| sp_P60716_LIPA_ECOLI | -2.8 | -3.4 | -2.1 | 5 Lipoyl synthase OS=Escl   |
| sp_P21170_SPEA_ECOLI | -2.9 | -3.3 | -2.5 | 12 Biosynthetic arginine de |
| sp_P21177_FADB_ECOLI | -2.9 | -3.3 | -2.5 | 10 Fatty acid oxidation cor |
| sp_P43337_NUDL_ECOLI | -2.9 | -3.5 | -2.3 | 4 Uncharacterized Nudix     |
| sp_P0A879_TRPB_ECOLI | -3   | -3.4 | -2.7 | 24 Tryptophan synthase br   |
| sp_P64581_YQJD_ECOLI | -3   | -4.1 | -2.2 | 2 Uncharacterized protei    |
| sp_P75745_YBGK_ECOLI | -3   | -7   | -2.1 | 3 Uncharacterized protei    |
| sp_P0AEI1_MIAB_ECOLI | -3.2 | -7   | -2   | 3 (Dimethylallyl)adenosin   |
| sp_P31802_NARP_ECOLI | -3.2 | -7   | -0.8 | 2 Nitrate/nitrite respons   |
| sp_P69828_PTKA_ECOLI | -3.4 | -3.8 | -3   | 12 Galactitol-specific phos |
| sp_P0A6U5_RSMG_ECOLI | -3.5 | -3.9 | -3.1 | 7 Ribosomal RNA small su    |
| sp_P76034_YCIT_ECOLI | -3.5 | -4   | -2.9 | 9 Uncharacterized HTH-ty    |
| sp_P0A6C8_ARGB_ECOLI | -3.7 | -4.1 | -3   | 32 Acetylglutamate kinase   |
| sp_P0A8F4_URK_ECOLI  | -3.7 | -4.2 | -3.1 | 7 Uridine kinase OS=Esch    |
| sp_P0ACJ0_LRP_ECOLI  | -3.7 | -4.9 | -2.4 | 2 Leucine-responsive regi   |
| sp_P0AEZ3_MIND_ECOLI | -3.7 | -4   | -0.7 | 36 Septum site-determinir   |
| sp_P76027_OPPD_ECOLI | -3.7 | -4.5 | -2.9 | 2 Oligopeptide transport    |
| sp_P0A959_YFBQ_ECOLI | -3.8 | -4.4 | -3.1 | 4 Uncharacterized amino     |
| sp_P23845_CYSN_ECOLI | -3.9 | -4.4 | -3.4 | 12 Sulfate adenylyltransfer |
| sp_P28635_METQ_ECOLI | -3.9 | -4.4 | -3.3 | 7 D-methionine-binding I    |
| sp_P0ABB4_ATPB_ECOLI | -4   | -4.4 | -3.6 | 20 ATP synthase subunit b   |
| sp_P76422_THID_ECOLI | -4   | -5.4 | -3.4 | 6 Hydroxymethylpyrimidi     |
| sp_P04968_THD1_ECOLI | -4.1 | -5.2 | -3.1 | 3 Threonine dehydratase     |
| sp_P22523_MUKB_ECOLI | -4.2 | -4.7 | -3.7 | 7 Chromosome partition      |
| sp_P0ABA0_ATPF_ECOLI | -4.6 | -5.1 | -4   | 4 ATP synthase subunit b    |
| sp_P0A6C5_ARGA_ECOLI | -4.8 | -5.5 | -4   | 5 Amino-acid acetyltransi   |
| sp_P0A7F3_PYRI_ECOLI | -4.8 | -5.4 | -4.2 | 7 Aspartate carbamoyltra    |
| sp_P0ACP1_FRUR_ECOLI | -4.8 | -6.1 | -4.1 | 6 Fructose repressor OS=    |
| sp_P00893_ILVI_ECOLI | -4.9 | -5.4 | -3.7 | 10 Acetolactate synthase i  |
| sp_P30138_THIF_ECOLI | -4.9 | -5.6 | -4.4 | 10 Sulfur carrier protein T |
| sp_P0A9L5_PPIC_ECOLI | -5.1 | -5.8 | -4.4 | 4 Peptidyl-prolyl cis-trans |
| sp_P0A698_UVRA_ECOLI | -5.5 | -6.3 | -4.8 | 3 UvrABC system protein     |
| sp_P0AG30_RHO_ECOLI  | -6   | -6.3 | -5.6 | 28 Transcription terminati  |
| sp_P00936_CYAA_ECOLI | -6.1 | -7   | -1.4 | 3 Adenylate cyclase OS=E    |
| sp_P62399_RL5_ECOLI  | -6.7 | -7   | -5.9 | 2 50S ribosomal protein L   |
| sp_P00562_AK2H_ECOLI | -6.8 | -7   | -6.5 | 23 Bifunctional aspartokin  |
| sp_P39274_YJDJ_ECOLI | -6.9 | -7   | -6.6 | 17 Uncharacterized protei   |
| sp_P06971_FHUA_ECOLI | -7   | -7   | -6.2 | 2 Ferrichrome-iron recep    |
| sp_P0A6Y5_HSLO_ECOLI | -7   | -7   | -6.4 | 8 33 kDa chaperonin OS=     |

chia coli (strain K12) GN=hfq PE=1 SV=2 [MASS=11166]  
51 OS=Escherichia coli (strain K12) GN=rpsA PE=1 SV=1 [MASS=61158]  
54 OS=Escherichia coli (strain K12) GN=rpsD PE=1 SV=2 [MASS=23469]  
1 coli (strain K12) GN=eno PE=1 SV=2 [MASS=45655]  
Escherichia coli (strain K12) GN=rnb PE=1 SV=3 [MASS=72491]  
57 OS=Escherichia coli (strain K12) GN=rpsG PE=1 SV=3 [MASS=20019]  
etase OS=Escherichia coli (strain K12) GN=purA PE=1 SV=2 [MASS=47345]  
.1 OS=Escherichia coli (strain K12) GN=rplA PE=1 SV=2 [MASS=24730]  
o-heptose-6-epimerase OS=Escherichia coli (strain K12) GN=hldD PE=1 SV=1 [MASS=34893]  
subunit alpha OS=Escherichia coli (strain K12) GN=ihfA PE=1 SV=1 [MASS=11354]  
59 OS=Escherichia coli (strain K12) GN=rpsI PE=1 SV=2 [MASS=14856]  
rotein of acetyl-CoA carboxylase OS=Escherichia coli (strain K12) GN=accB PE=1 SV=1 [MASS=16687]  
royltriglutamate--homocysteine methyltransferase OS=Escherichia coli (strain K12) GN=metE PE=1 SV=6 [M  
'merase subunit alpha OS=Escherichia coli (strain K12) GN=rpoA PE=1 SV=1 [MASS=36512]  
ase 1 OS=Escherichia coli (strain K12) GN=pf1B PE=1 SV=2 [MASS=85357]  
ise activity A OS=Escherichia coli (strain K12) GN=rraA PE=1 SV=1 [MASS=17360]  
yl cis-trans isomerase slyD OS=Escherichia coli (strain K12) GN=slyD PE=1 SV=1 [MASS=20853]  
/dratase small subunit OS=Escherichia coli (strain K12) GN=leuD PE=1 SV=3 [MASS=22487]  
OS=Escherichia coli (strain K12) GN=acnB PE=1 SV=3 [MASS=93498]  
n ydiH OS=Escherichia coli (strain K12) GN=ydiH PE=4 SV=2 [MASS=7266]  
U-alpha OS=Escherichia coli (strain K12) GN=hupA PE=1 SV=1 [MASS=9535]  
OS=Escherichia coli (strain K12) GN=ybeD PE=1 SV=1 [MASS=9827]  
=Escherichia coli (strain K12) GN=cysK PE=1 SV=2 [MASS=34490]  
1 ygfZ OS=Escherichia coli (strain K12) GN=ygfZ PE=1 SV=2 [MASS=36094]  
'merase subunit beta' OS=Escherichia coli (strain K12) GN=rpoC PE=1 SV=1 [MASS=155160]  
'merase subunit beta OS=Escherichia coli (strain K12) GN=rpoB PE=1 SV=1 [MASS=150632]  
n protein nusA OS=Escherichia coli (strain K12) GN=nusA PE=1 SV=1 [MASS=54871]  
ise OS=Escherichia coli (strain K12) GN=aspS PE=1 SV=1 [MASS=65913]  
ifunctional protein hisI OS=Escherichia coli (strain K12) GN=hisI PE=3 SV=3 [MASS=22756]  
ate uridylyltransferase OS=Escherichia coli (strain K12) GN=galU PE=1 SV=2 [MASS=32942]  
ical cofactor OS=Escherichia coli (strain K12) GN=grcA PE=1 SV=1 [MASS=14284]  
OS=Escherichia coli (strain K12) GN=ypeA PE=3 SV=2 [MASS=16312]  
/dratase large subunit OS=Escherichia coli (strain K12) GN=leuC PE=1 SV=2 [MASS=49882]  
ductase subunit C OS=Escherichia coli (strain K12) GN=ahpC PE=1 SV=2 [MASS=20761]  
ein] reductase [NADH] OS=Escherichia coli (strain K12) GN=fabI PE=1 SV=2 [MASS=27864]  
-NS OS=Escherichia coli (strain K12) GN=hns PE=1 SV=2 [MASS=15540]  
photransferase enzyme IIB component OS=Escherichia coli (strain K12) GN=gatB PE=1 SV=2 [MASS=10222]  
OS=Escherichia coli (strain K12) GN=mdh PE=1 SV=1 [MASS=32337]  
erichia coli (strain K12) GN=ackA PE=1 SV=1 [MASS=43290]  
S=Escherichia coli (strain K12) GN=murI PE=1 SV=2 [MASS=31002]  
se ATPase subunit HslU OS=Escherichia coli (strain K12) GN=hslU PE=1 SV=1 [MASS=49594]  
=Escherichia coli (strain K12) GN=fusA PE=1 SV=2 [MASS=77581]  
scherichia coli (strain K12) GN=adk PE=1 SV=1 [MASS=23586]  
hotransferase enzyme IIA component OS=Escherichia coli (strain K12) GN=crr PE=1 SV=2 [MASS=18251]  
atase OS=Escherichia coli (strain K12) GN=ilvD PE=1 SV=5 [MASS=65532]  
okinase 3 OS=Escherichia coli (strain K12) GN=lysC PE=1 SV=2 [MASS=48532]  
protein phosphotransferase OS=Escherichia coli (strain K12) GN=ptsI PE=1 SV=1 [MASS=63562]

ate uridylyltransferase OS=Escherichia coli (strain K12) GN=galF PE=1 SV=1 [MASS=32829]  
ichia coli (strain K12) GN=mrp PE=3 SV=1 [MASS=39938]  
herichia coli (strain K12) GN=grxD PE=1 SV=1 [MASS=12879]  
B [glutamine-hydrolyzing] OS=Escherichia coli (strain K12) GN=asnB PE=1 SV=3 [MASS=62659]  
one biosynthesis methyltransferase ubiE OS=Escherichia coli (strain K12) GN=ubiE PE=1 SV=1 [MASS=28073]  
D OS=Escherichia coli (strain K12) GN=foLD PE=1 SV=4 [MASS=31044]  
=Escherichia coli (strain K12) GN=thrC PE=1 SV=1 [MASS=47114]  
.15 OS=Escherichia coli (strain K12) GN=rplO PE=1 SV=1 [MASS=14980]  
nidazole-succinocarboxamide synthase OS=Escherichia coli (strain K12) GN=purC PE=1 SV=1 [MASS=26995]  
protein] reductase OS=Escherichia coli (strain K12) GN=fabG PE=1 SV=1 [MASS=25560]  
al regulator iscR OS=Escherichia coli (strain K12) GN=iscR PE=1 SV=1 [MASS=17337]  
transferase OS=Escherichia coli (strain K12) GN=avtA PE=3 SV=3 [MASS=46711]  
A OS=Escherichia coli (strain K12) GN=uspA PE=1 SV=2 [MASS=16066]  
yde 2,1-aminomutase OS=Escherichia coli (strain K12) GN=hemL PE=1 SV=2 [MASS=45366]  
nide formyltransferase 2 OS=Escherichia coli (strain K12) GN=purT PE=1 SV=3 [MASS=42434]  
Protein D OS=Escherichia coli GN=D PE=4 SV=1 [MASS=15756]  
erichia coli (strain K12) GN=pyrG PE=1 SV=2 [MASS=60374]  
.11 OS=Escherichia coli (strain K12) GN=rplK PE=1 SV=2 [MASS=14875]  
ribosyltransferase OS=Escherichia coli (strain K12) GN=hpt PE=1 SV=1 [MASS=20115]  
se flavoprotein subunit OS=Escherichia coli (strain K12) GN=sdhA PE=1 SV=1 [MASS=64422]  
osphate synthase subunit hisH OS=Escherichia coli (strain K12) GN=hisH PE=1 SV=1 [MASS=21653]  
ase/homoserine dehydrogenase 1 OS=Escherichia coli (strain K12) GN=thrA PE=1 SV=2 [MASS=89120]  
decarboxylase OS=Escherichia coli (strain K12) GN=pyrF PE=1 SV=1 [MASS=26350]  
Escherichia coli (strain K12) GN=efp PE=1 SV=2 [MASS=20591]  
l specificity factor OS=Escherichia coli (strain K12) GN=minE PE=1 SV=1 [MASS=10235]  
ransferase OS=Escherichia coli (strain K12) GN=upp PE=1 SV=1 [MASS=22533]  
acid aminotransferase OS=Escherichia coli (strain K12) GN=ilvE PE=1 SV=2 [MASS=34094]  
F OS=Escherichia coli (strain K12) GN=uspF PE=1 SV=2 [MASS=16017]  
510 OS=Escherichia coli (strain K12) GN=rpsJ PE=1 SV=1 [MASS=11736]  
Escherichia coli (strain K12) GN=thrB PE=1 SV=2 [MASS=33624]  
beta subunit OS=Escherichia coli (strain K12) GN=glyS PE=1 SV=4 [MASS=76813]  
A OS=Escherichia coli (strain K12) GN=hscA PE=1 SV=1 [MASS=65652]  
ontrol protein ArcA OS=Escherichia coli (strain K12) GN=arcA PE=1 SV=1 [MASS=27292]  
Escherichia coli (strain K12) GN=accC PE=1 SV=2 [MASS=49321]  
OS=Escherichia coli (strain K12) GN=yacF PE=3 SV=2 [MASS=28292]  
hase OS=Escherichia coli (strain K12) GN=leuA PE=1 SV=5 [MASS=57298]  
ine 1-carboxyvinyltransferase OS=Escherichia coli (strain K12) GN=murA PE=1 SV=1 [MASS=44818]  
protein] synthase 1 OS=Escherichia coli (strain K12) GN=fabB PE=1 SV=1 [MASS=42613]  
ate kinase OS=Escherichia coli (strain K12) GN=thiL PE=3 SV=1 [MASS=35071]  
ynthase OS=Escherichia coli (strain K12) GN=ppsA PE=1 SV=5 [MASS=87435]  
inding protein yjiA OS=Escherichia coli (strain K12) GN=yjiA PE=1 SV=3 [MASS=35660]  
Escherichia coli (strain K12) GN=glxK PE=1 SV=1 [MASS=38734]  
tease ATP-binding subunit clpX OS=Escherichia coli (strain K12) GN=clpX PE=1 SV=2 [MASS=46356]  
phate dehydrogenase A OS=Escherichia coli (strain K12) GN=gapA PE=1 SV=2 [MASS=35532]  
hase OS=Escherichia coli (strain K12) GN=aroB PE=3 SV=1 [MASS=38881]  
; protein mreB OS=Escherichia coli (strain K12) GN=mreB PE=1 SV=1 [MASS=36952]  
D OS=Escherichia coli (strain K12) GN=uspD PE=2 SV=1 [MASS=16293]  
drofolate reductase OS=Escherichia coli (strain K12) GN=metF PE=1 SV=1 [MASS=33103]

es formation protein hypE OS=Escherichia coli (strain K12) GN=hypE PE=1 SV=2 [MASS=35092]  
synthesis protein rffA OS=Escherichia coli (strain K12) GN=rffA PE=3 SV=2 [MASS=41901]  
S=Escherichia coli (strain K12) GN=ucpA PE=1 SV=3 [MASS=27850]  
ilator component B OS=Escherichia coli (strain K12) GN=rcsB PE=1 SV=1 [MASS=23671]  
inase OS=Escherichia coli (strain K12) GN=thiM PE=3 SV=1 [MASS=27339]  
rotein endopeptidase OS=Escherichia coli (strain K12) GN=gcp PE=3 SV=2 [MASS=36008]  
ransferase OS=Escherichia coli (strain K12) GN=glyA PE=1 SV=1 [MASS=45317]  
e dehydrogenase OS=Escherichia coli (strain K12) GN=asd PE=1 SV=1 [MASS=40018]  
α/BipA OS=Escherichia coli (strain K12) GN=typA PE=1 SV=2 [MASS=67355]  
Escherichia coli (strain K12) GN=aroL PE=1 SV=3 [MASS=19151]  
synthase OS=Escherichia coli (strain K12) GN=metK PE=1 SV=2 [MASS=41952]  
protein] synthase 2 OS=Escherichia coli (strain K12) GN=fabF PE=1 SV=2 [MASS=43046]  
n ybgJ OS=Escherichia coli (strain K12) GN=ybgJ PE=4 SV=1 [MASS=23947]  
OS=Escherichia coli (strain K12) GN=proS PE=1 SV=4 [MASS=63693]  
phosphate synthase [UDP-forming] OS=Escherichia coli (strain K12) GN=otsA PE=1 SV=3 [MASS=53611]  
lE OS=Escherichia coli (strain K12) GN=hldE PE=1 SV=1 [MASS=51051]  
synthase small chain OS=Escherichia coli (strain K12) GN=carA PE=1 SV=1 [MASS=41431]  
=Escherichia coli (strain K12) GN=tmk PE=1 SV=1 [MASS=23783]  
ransporter ATP-binding protein yjjK OS=Escherichia coli (strain K12) GN=yjjK PE=1 SV=2 [MASS=62443]  
nation protein nusG OS=Escherichia coli (strain K12) GN=nusG PE=1 SV=2 [MASS=20532]  
e OS=Escherichia coli (strain K12) GN=selD PE=1 SV=1 [MASS=36687]  
erichia coli (strain K12) GN=usg PE=1 SV=1 [MASS=36364]  
omponent 1 OS=Escherichia coli (strain K12) GN=trpE PE=1 SV=2 [MASS=57494]  
sozyme 1 large subunit OS=Escherichia coli (strain K12) GN=ilvB PE=1 SV=1 [MASS=60441]  
Escherichia coli (strain K12) GN=groL PE=1 SV=2 [MASS=57329]  
lpha OS=Escherichia coli (strain K12) GN=atpA PE=1 SV=1 [MASS=55222]  
ory protein uhpA OS=Escherichia coli (strain K12) GN=uhpA PE=1 SV=1 [MASS=20889]  
-[(5-phosphoribosylamino)methylideneamino] imidazole-4-carboxamide isomerase OS=Escherichia coli (str  
-2-en-1-yl diphosphate synthase OS=Escherichia coli (strain K12) GN=ispG PE=1 SV=1 [MASS=40684]  
synthase large chain OS=Escherichia coli (strain K12) GN=carB PE=1 SV=2 [MASS=117842]  
lycinamide cyclo-ligase OS=Escherichia coli (strain K12) GN=purM PE=1 SV=3 [MASS=36854]  
methylthiotransferase rimO OS=Escherichia coli (strain K12) GN=rimO PE=1 SV=1 [MASS=49582]  
erichia coli (strain K12) GN=nagD PE=1 SV=1 [MASS=27163]  
rotein mutS OS=Escherichia coli (strain K12) GN=mutS PE=1 SV=1 [MASS=95247]  
nsferase OS=Escherichia coli (strain K12) GN=hisG PE=1 SV=1 [MASS=33367]  
Y OS=Escherichia coli (strain K12) GN=ftsY PE=1 SV=1 [MASS=54513]  
α OS=Escherichia coli (strain K12) GN=lepA PE=1 SV=1 [MASS=66570]  
erichia coli (strain K12) GN=recA PE=1 SV=2 [MASS=37973]  
inhibitor OS=Escherichia coli (strain K12) GN=iciA PE=1 SV=1 [MASS=33472]  
3 OS=Escherichia coli (strain K12) GN=sohB PE=1 SV=1 [MASS=39366]  
S=Escherichia coli (strain K12) GN=iscS PE=1 SV=1 [MASS=45089]  
Z OS=Escherichia coli (strain K12) GN=ftsZ PE=1 SV=1 [MASS=40324]  
te dehydrogenase OS=Escherichia coli (strain K12) GN=epd PE=1 SV=2 [MASS=37299]  
rophosphorylase OS=Escherichia coli (strain K12) GN=thiE PE=1 SV=1 [MASS=23015]  
merase B OS=Escherichia coli (strain K12) GN=rpiB PE=1 SV=2 [MASS=16073]  
: alpha subunit OS=Escherichia coli (strain K12) GN=glyQ PE=1 SV=2 [MASS=34774]  
drogenase OS=Escherichia coli (strain K12) GN=adhE PE=1 SV=2 [MASS=96127]  
Y OS=Escherichia coli (strain K12) GN=uvrY PE=1 SV=1 [MASS=23893]

S=Escherichia coli (strain K12) GN=metH PE=1 SV=5 [MASS=135997]  
sozyme 3 small subunit OS=Escherichia coli (strain K12) GN=ilvH PE=1 SV=3 [MASS=17977]  
Escherichia coli (strain K12) GN=thiG PE=1 SV=3 [MASS=26896]  
Escherichia coli (strain K12) GN=lipA PE=1 SV=1 [MASS=36072]  
isocitrate dehydrogenase OS=Escherichia coli (strain K12) GN=speA PE=1 SV=2 [MASS=73898]  
sigma factor 70 OS=Escherichia coli (strain K12) GN=fadB PE=1 SV=2 [MASS=79594]  
phosphatase OS=Escherichia coli (strain K12) GN=nudL PE=3 SV=1 [MASS=21436]  
beta chain OS=Escherichia coli (strain K12) GN=trpB PE=1 SV=2 [MASS=42983]  
sigma factor 54 OS=Escherichia coli (strain K12) GN=yqjD PE=4 SV=1 [MASS=11051]  
sigma factor 32 OS=Escherichia coli (strain K12) GN=ybgK PE=4 SV=1 [MASS=34386]  
lysine tRNA methyltransferase miaB OS=Escherichia coli (strain K12) GN=miaB PE=1 SV=1 [MASS=53663]  
sigma factor 24 OS=Escherichia coli (strain K12) GN=narP PE=3 SV=1 [MASS=23575]  
phosphotransferase enzyme IIA component OS=Escherichia coli (strain K12) GN=gatA PE=4 SV=1 [MASS=16907]  
sigma factor 54 subunit methyltransferase G OS=Escherichia coli (strain K12) GN=rsmG PE=1 SV=1 [MASS=23431]  
sigma factor 54 type transcriptional regulator yciT OS=Escherichia coli (strain K12) GN=yciT PE=4 SV=1 [MASS=27603]  
sigma factor 54 OS=Escherichia coli (strain K12) GN=argB PE=1 SV=1 [MASS=27160]  
Escherichia coli (strain K12) GN=udk PE=3 SV=1 [MASS=24353]  
sigma factor 24 regulatory protein OS=Escherichia coli (strain K12) GN=lrp PE=1 SV=2 [MASS=18887]  
sigma factor 54 protein minD OS=Escherichia coli (strain K12) GN=minD PE=1 SV=2 [MASS=29614]  
sigma factor 54 ATP-binding protein oppD OS=Escherichia coli (strain K12) GN=oppD PE=3 SV=2 [MASS=37188]  
sigma factor 54 transferase yfbQ OS=Escherichia coli (strain K12) GN=yfbQ PE=1 SV=1 [MASS=45517]  
sigma factor 54 kinase subunit 1 OS=Escherichia coli (strain K12) GN=cysN PE=1 SV=1 [MASS=52558]  
sigma factor 54 lipoprotein metQ OS=Escherichia coli (strain K12) GN=metQ PE=1 SV=2 [MASS=29432]  
sigma factor 54 eta OS=Escherichia coli (strain K12) GN=atpD PE=1 SV=2 [MASS=50325]  
sigma factor 54 threonine/phosphomethylpyrimidine kinase OS=Escherichia coli (strain K12) GN=thiD PE=1 SV=1 [MASS=28634]  
sigma factor 54 biosynthetic OS=Escherichia coli (strain K12) GN=ilvA PE=1 SV=1 [MASS=56195]  
sigma factor 54 protein mukB OS=Escherichia coli (strain K12) GN=mukB PE=1 SV=2 [MASS=170230]  
sigma factor 54 OS=Escherichia coli (strain K12) GN=atpF PE=1 SV=1 [MASS=17264]  
sigma factor 54 transferase OS=Escherichia coli (strain K12) GN=argA PE=1 SV=1 [MASS=49195]  
sigma factor 54 transferase regulatory chain OS=Escherichia coli (strain K12) GN=pyrI PE=1 SV=2 [MASS=17121]  
Escherichia coli (strain K12) GN=fruR PE=1 SV=1 [MASS=37999]  
sigma factor 54 sozyme 3 large subunit OS=Escherichia coli (strain K12) GN=ilvI PE=1 SV=2 [MASS=62984]  
sigma factor 54 threonine adenylyltransferase OS=Escherichia coli (strain K12) GN=thiF PE=1 SV=2 [MASS=26970]  
sigma factor 54 isomerase C OS=Escherichia coli (strain K12) GN=ppiC PE=1 SV=2 [MASS=10232]  
sigma factor 54 A OS=Escherichia coli (strain K12) GN=uvrA PE=1 SV=1 [MASS=103868]  
sigma factor 54 sigma factor rho OS=Escherichia coli (strain K12) GN=rho PE=1 SV=1 [MASS=47004]  
Escherichia coli (strain K12) GN=cyaA PE=3 SV=5 [MASS=97586]  
sigma factor 54 OS=Escherichia coli (strain K12) GN=rpIE PE=1 SV=2 [MASS=20302]  
sigma factor 54 aspartate/homoserine dehydrogenase 2 OS=Escherichia coli (strain K12) GN=metL PE=1 SV=3 [MASS=88888]  
sigma factor 54 sigma factor 54 OS=Escherichia coli (strain K12) GN=yjdJ PE=4 SV=1 [MASS=10468]  
sigma factor 54 sigma factor 54 OS=Escherichia coli (strain K12) GN=fhuA PE=1 SV=2 [MASS=82182]  
Escherichia coli (strain K12) GN=hsIO PE=1 SV=1 [MASS=32534]



MASS=84674]

|

3]

1

rain K12) GN=hisA PE=1 SV=2 [MASS=26033]
