# Supplementary material
Source: PubMed Central journal article supplement (PMC5108054)
Supplement: NIHMS436991-supplement-S6_mid_log_pH2.pdf [file NIHMS436991-supplement-S6_mid_log_pH2.pdf]

| locus                | log2ratio | lowerCI | upperCI | quantified_ | description   |
|----------------------|-----------|---------|---------|-------------|---------------|
| sp_P39274_YJDJ_ECOLI | 6.7       | 6.2     | 7       | 6           | Uncharacte    |
| sp_POA8R0_RRAA_ECOLI | 5         | 4.2     | 5.7     | 2           | Regulator o   |
| sp_P69913_CSRA_ECOLI | 5         | 4.2     | 5.8     | 2           | Carbon stor   |
| sp_P76539_YPEA_ECOLI | 3.7       | 3.1     | 4.2     | 6           | Acetyltransi  |
| sp_P75838_YCAO_ECOLI | 3.5       | 2.9     | 4.2     | 5           | UPF0142 pr    |
| sp_P64476_YDIH_ECOLI | 2.9       | 2.1     | 3.6     | 3           | Uncharacte    |
| sp_POA6X3_HFQ_ECOLI  | 2.6       | 2       | 3.2     | 5           | Protein hfq   |
| sp_P67910_HLDD_ECOLI | 2.5       | 2.3     | 2.7     | 52          | ADP-L-glyce   |
| sp_P30138_THIF_ECOLI | 2.2       | 1.6     | 3.1     | 5           | Sulfur carri  |
| sp_POA7L0_RL1_ECOLI  | 1.7       | 1       | 2.5     | 4           | 50S riboson   |
| sp_POA9K9_SLYD_ECOLI | 1.5       | 0.9     | 2       | 6           | FKBP-type p   |
| sp_POAEZ3_MIND_ECOLI | 1.1       | 0.7     | 1.5     | 16          | Septum site   |
| sp_POA6C8_ARGB_ECOLI | 0.9       | 0.4     | 1.3     | 9           | Acetylglutai  |
| sp_POAFG0_NUSG_ECOLI | 0.9       | -0.1    | 1.8     | 2           | Transcriptic  |
| sp_POA7Z4_RPOA_ECOLI | 0.5       | 0.2     | 0.9     | 17          | DNA-directe   |
| sp_POAED0_USPA_ECOLI | 0.2       | -0.3    | 0.7     | 5           | Universal st  |
| sp_POA8T7_RPOC_ECOLI | -0.1      | -0.3    | 0.1     | 41          | DNA-directe   |
| sp_POAG67_RS1_ECOLI  | -0.1      | -0.5    | 0.4     | 10          | 30S riboson   |
| sp_P36680_YACF_ECOLI | -0.1      | -1.3    | 1.1     | 2           | UPF0289 pr    |
| sp_POAG30_RHO_ECOLI  | -0.2      | -0.9    | 0.7     | 6           | Transcriptic  |
| sp_POA8V2_RPOB_ECOLI | -0.3      | -0.5    | -0.1    | 42          | DNA-directe   |
| sp_POA9B2_G3P1_ECOLI | -0.4      | -1.1    | 0.3     | 3           | Glyceraldeh   |
| sp_POACF8_HNS_ECOLI  | -0.4      | -1.3    | 0.5     | 2           | DNA-bindin    |
| sp_P61889_MDH_ECOLI  | -0.4      | -0.9    | 0       | 7           | Malate deh    |
| sp_POA953_FABB_ECOLI | -0.6      | -1.7    | 0.5     | 2           | 3-oxoacyl-[ε  |
| sp_P08178_PUR5_ECOLI | -0.7      | -1.1    | -0.3    | 8           | Phosphorib    |
| sp_POAGK8_ISCR_ECOLI | -0.7      | -1.3    | -0.1    | 5           | HTH-type tr   |
| sp_POA7D7_PUR7_ECOLI | -0.8      | -1.7    | 0.1     | 2           | Phosphorib    |
| sp_POAAB8_USPD_ECOLI | -0.8      | -1.5    | 0       | 3           | Universal st  |
| sp_POA9B6_E4PD_ECOLI | -0.9      | -1.9    | 0.1     | 2           | D-erythrose   |
| sp_POA6S7_GPDA_ECOLI | -1        | -1.9    | 0       | 2           | Glycerol-3-φ  |
| sp_POA850_TIG_ECOLI  | -1        | -2.2    | 0       | 3           | Trigger facti |
| sp_P27833_RFFA_ECOLI | -1        | -1.8    | -0.2    | 4           | Lipopolysac   |
| sp_POA734_MINE_ECOLI | -1.1      | -1.8    | -0.4    | 3           | Cell division |
| sp_POAEK4_FABI_ECOLI | -1.1      | -2.5    | 0.2     | 2           | Enoyl-[acyl-  |
| sp_P37903_USPF_ECOLI | -1.1      | -1.8    | -0.4    | 3           | Universal st  |
| sp_P08390_USG_ECOLI  | -1.2      | -2.2    | -0.4    | 4           | USG-1 prote   |
| sp_POAAB6_GALF_ECOLI | -1.2      | -1.8    | -0.6    | 4           | UTP--glucos   |
| sp_P10371_HIS4_ECOLI | -1.2      | -2.5    | 0       | 2           | 1-(5-phosph   |
| sp_P23893_GSA_ECOLI  | -1.2      | -1.8    | -0.7    | 5           | Glutamate-    |
| sp_P69828_PTKA_ECOLI | -1.2      | -1.7    | -0.7    | 8           | Galactitol-sj |
| sp_P60757_HIS1_ECOLI | -1.3      | -1.7    | -0.8    | 7           | ATP phosph    |
| sp_P08839_PT1_ECOLI  | -1.4      | -2      | -0.8    | 8           | Phosphoeni    |
| sp_POA6F1_CARA_ECOLI | -1.4      | -1.8    | -0.9    | 7           | Carbamoyl-    |
| sp_POA8S1_ICIA_ECOLI | -1.4      | -2.1    | -0.7    | 3           | Chromosom     |
| sp_P16456_SELD_ECOLI | -1.4      | -1.8    | -1      | 11          | Selenide, w   |
| sp_P24182_ACCC_ECOLI | -1.4      | -2.1    | -0.7    | 3           | Biotin carbc  |

|                       |      |      |      |                  |
|-----------------------|------|------|------|------------------|
| sp_POAB80_ILVE_ECOLI  | -1.5 | -2.3 | -0.7 | 2 Branched-cl    |
| sp_POACP1_FRUR_ECOLI  | -1.5 | -2.4 | -0.6 | 2 Fructose rej   |
| sp_POAG14_SOHB_ECOLI  | -1.5 | -2.6 | -0.5 | 2 Probable pr    |
| sp_P62399_RL5_ECOLI   | -1.5 | -2.5 | -0.5 | 2 50S riboson    |
| sp_P00960_SYGA_ECOLI  | -1.7 | -2.4 | -1   | 3 Glycyl-tRNA    |
| sp_POA799_PGK_ECOLI   | -1.7 | -2.5 | -1.1 | 4 Phosphogly     |
| sp_P60716_LIPA_ECOLI  | -1.7 | -3   | -0.8 | 2 Lipoyl synth   |
| sp_P09053_AVTA_ECOLI  | -1.8 | -2.5 | -1.1 | 4 Valine--pyru   |
| sp_POA6H1_CLPX_ECOLI  | -1.8 | -2.5 | -1.1 | 3 ATP-depend     |
| sp_P76034_YCIT_ECOLI  | -1.8 | -2.4 | -1   | 4 Uncharacte     |
| sp_P00561_AK1H_ECOLI  | -1.9 | -3   | -0.8 | 2 Bifunctiona    |
| sp_P02413_RL15_ECOLI  | -1.9 | -2.6 | -1.3 | 4 50S riboson    |
| sp_POA836_SUCC_ECOLI  | -1.9 | -2.7 | -1   | 5 Succinyl-Co.   |
| sp_POAF24_NAGD_ECOLI  | -1.9 | -2.4 | -1.5 | 8 Protein nag    |
| sp_P13009_METH_ECOLI  | -1.9 | -2.6 | -1.2 | 4 Methionine     |
| sp_P62620_ISPG_ECOLI  | -1.9 | -2.3 | -1.6 | 16 4-hydroxy-3   |
| sp_P08660_AK3_ECOLI   | -2   | -2.4 | -1.5 | 10 Lysine-sens   |
| sp_POA9A6_FTSZ_ECOLI  | -2   | -2.3 | -1.7 | 21 Cell division |
| sp_P77364_GLXK1_ECOLI | -2   | -3.1 | -0.9 | 3 Glycerate ki   |
| sp_POA7G6_RECA_ECOLI  | -2.1 | -3   | -1.5 | 7 Protein rec/   |
| sp_P21889_SYD_ECOLI   | -2.1 | -3.1 | -1.2 | 5 Aspartyl-tRI   |
| sp_P60785_LEPA_ECOLI  | -2.1 | -2.5 | -1.7 | 14 GTP-binding   |
| sp_P76422_THID_ECOLI  | -2.1 | -7   | -0.9 | 2 Hydroxyme      |
| sp_P00547_KHSE_ECOLI  | -2.2 | -2.8 | -1.5 | 3 Homoserine     |
| sp_P02359_RS7_ECOLI   | -2.2 | -3   | -1.4 | 2 30S riboson    |
| sp_P00934_THRC_ECOLI  | -2.3 | -2.5 | -2   | 36 Threonine s   |
| sp_POA879_TRPB_ECOLI  | -2.3 | -2.6 | -2   | 14 Tryptophan    |
| sp_POA9A9_FUR_ECOLI   | -2.3 | -3.4 | -1.2 | 2 Ferric uptak   |
| sp_POA6P1_EFTS_ECOLI  | -2.4 | -3.2 | -1.6 | 2 Elongation f   |
| sp_P07639_AROB_ECOLI  | -2.5 | -2.9 | -2.1 | 15 3-dehydroq    |
| sp_P22634_MURI_ECOLI  | -2.5 | -3   | -1.9 | 6 Glutamate i    |
| sp_POA6B7_ISCS_ECOLI  | -2.6 | -3.2 | -1.8 | 5 Cysteine de    |
| sp_POA959_YFBQ_ECOLI  | -2.6 | -7   | -1.7 | 2 Uncharacte     |
| sp_POAGG0_THIL_ECOLI  | -2.6 | -3.1 | -2   | 5 Thiamine-m     |
| sp_P08142_ILVB_ECOLI  | -2.7 | -3.2 | -2.2 | 15 Acetolactat   |
| sp_POA749_MURA_ECOLI  | -2.7 | -3.1 | -2.3 | 12 UDP-N-acet    |
| sp_POA887_UBIE_ECOLI  | -2.7 | -3.8 | -1.9 | 2 Ubiquinone     |
| sp_POA6A3_ACKA_ECOLI  | -2.8 | -3.2 | -2.4 | 10 Acetate kin   |
| sp_POA7R5_RS10_ECOLI  | -2.8 | -3.2 | -2.3 | 9 30S riboson    |
| sp_POAEP3_GALU_ECOLI  | -2.8 | -3.6 | -2   | 2 UTP--glucos    |
| sp_P69441_KAD_ECOLI   | -2.8 | -3.3 | -2.4 | 10 Adenylate k   |
| sp_POAAI5_FABF_ECOLI  | -2.9 | -3.5 | -2.3 | 4 3-oxoacyl-[ε   |
| sp_POAC41_DHSA_ECOLI  | -2.9 | -3.3 | -2.4 | 6 Succinate d    |
| sp_P33221_PURT_ECOLI  | -2.9 | -3.4 | -2.5 | 13 Phosphorib    |
| sp_P00893_ILVI_ECOLI  | -3   | -7   | -1.8 | 2 Acetolactat    |
| sp_P76423_THIM_ECOLI  | -3.1 | -3.7 | -2.5 | 4 Hydroxyeth     |
| sp_POAEZ1_METF_ECOLI  | -3.2 | -3.6 | -2.9 | 21 5,10-methy    |
| sp_P24203_YJIA_ECOLI  | -3.2 | -3.7 | -2.7 | 5 Uncharacte     |

|                       |      |      |      |                |
|-----------------------|------|------|------|----------------|
| sp_P32132_TYPA_ECOLI  | -3.2 | -3.5 | -2.9 | 22 GTP-binding |
| sp_P0A7E5_PYRG_ECOLI  | -3.3 | -7   | -2.2 | 2 CTP synthas  |
| sp_P0A8F0_UPP_ECOLI   | -3.3 | -3.9 | -2.6 | 4 Uracil phosf |
| sp_P05791_ILVD_ECOLI  | -3.4 | -3.9 | -2.9 | 5 Dihydroxy-a  |
| sp_P0A8M0_SYN_ECOLI   | -3.4 | -4.2 | -2.6 | 3 Asparaginy   |
| sp_P16659_SYP_ECOLI   | -3.6 | -3.9 | -3.4 | 29 Prolyl-tRNA |
| sp_P22106_ASNB_ECOLI  | -3.6 | -4.4 | -2.7 | 9 Asparagine   |
| sp_P0A825_GLYA_ECOLI  | -3.9 | -4.3 | -3.6 | 17 Serine hydr |
| sp_P0ABK5_CYSK_ECOLI  | -3.9 | -4.1 | -3.7 | 46 Cysteine sy |
| sp_P24186_FOLD_ECOLI  | -3.9 | -4.7 | -3.1 | 3 Bifunctiona  |
| sp_P0A6P9_ENO_ECOLI   | -4.2 | -4.8 | -3.7 | 9 Enolase OS-  |
| sp_P21170_SPEA_ECOLI  | -4.3 | -4.7 | -3.9 | 11 Biosyntheti |
| sp_P76658_HLDE_ECOLI  | -4.3 | -4.9 | -3.7 | 11 Bifunctiona |
| sp_P0A817_METK_ECOLI  | -4.4 | -4.8 | -4   | 17 S-adenosylr |
| sp_P0ADP0_YIGB_ECOLI  | -4.6 | -5.7 | -3.5 | 2 Uncharacte   |
| sp_P0A7D4_PURA_ECOLI  | -5   | -5.4 | -4.6 | 24 Adenylosuc  |
| sp_P0A9W3_YJJK_ECOLI  | -5   | -5.6 | -4.4 | 10 Uncharacte  |
| sp_P07023_TYRA_ECOLI  | -5.4 | -6.5 | -4.3 | 4 T-protein O  |
| sp_P0A8L1_SYS_ECOLI   | -5.4 | -6.5 | -4.3 | 2 Seryl-tRNA : |
| sp_P0A9C9_GLPX_ECOLI  | -5.5 | -6.3 | -4.7 | 3 Fructose-1,6 |
| sp_P0A796_K6PF1_ECOLI | -5.9 | -6.7 | -5.2 | 6 6-phosphof   |
| sp_P0A6Y5_HSLO_ECOLI  | -6.7 | -7   | -6.1 | 7 33 kDa chaç  |
| sp_P0A8M3_SYT_ECOLI   | -6.7 | -7   | -6.2 | 7 Threonyl-tR  |
| sp_P27550_ACSA_ECOLI  | -7   | -7   | -5.9 | 2 Acetyl-coen  |

urized protein yjdJ OS=Escherichia coli (strain K12) GN=yjdJ PE=4 SV=1 [MASS=10468]  
of ribonuclease activity A OS=Escherichia coli (strain K12) GN=rraA PE=1 SV=1 [MASS=17360]  
rage regulator OS=Escherichia coli (strain K12) GN=csrA PE=1 SV=1 [MASS=6856]  
ferase ypeA OS=Escherichia coli (strain K12) GN=ypeA PE=3 SV=2 [MASS=16312]  
rotein ycaO OS=Escherichia coli (strain K12) GN=ycaO PE=3 SV=2 [MASS=65652]  
urized protein ydiH OS=Escherichia coli (strain K12) GN=ydiH PE=4 SV=2 [MASS=7266]  
OS=Escherichia coli (strain K12) GN=hfq PE=1 SV=2 [MASS=11166]  
ero-D-manno-heptose-6-epimerase OS=Escherichia coli (strain K12) GN=hldD PE=1 SV=1 [MASS=34893]  
er protein ThiS adenylyltransferase OS=Escherichia coli (strain K12) GN=thiF PE=1 SV=2 [MASS=26970]  
nal protein L1 OS=Escherichia coli (strain K12) GN=rplA PE=1 SV=2 [MASS=24730]  
eptidyl-prolyl cis-trans isomerase slyD OS=Escherichia coli (strain K12) GN=slyD PE=1 SV=1 [MASS=20853]  
e-determining protein minD OS=Escherichia coli (strain K12) GN=minD PE=1 SV=2 [MASS=29614]  
mate kinase OS=Escherichia coli (strain K12) GN=argB PE=1 SV=1 [MASS=27160]  
on antitermination protein nusG OS=Escherichia coli (strain K12) GN=nusG PE=1 SV=2 [MASS=20532]  
ed RNA polymerase subunit alpha OS=Escherichia coli (strain K12) GN=rpoA PE=1 SV=1 [MASS=36512]  
ress protein A OS=Escherichia coli (strain K12) GN=uspA PE=1 SV=2 [MASS=16066]  
ed RNA polymerase subunit beta' OS=Escherichia coli (strain K12) GN=rpoC PE=1 SV=1 [MASS=155160]  
nal protein S1 OS=Escherichia coli (strain K12) GN=rpsA PE=1 SV=1 [MASS=61158]  
rotein yacF OS=Escherichia coli (strain K12) GN=yacF PE=3 SV=2 [MASS=28292]  
on termination factor rho OS=Escherichia coli (strain K12) GN=rho PE=1 SV=1 [MASS=47004]  
ed RNA polymerase subunit beta OS=Escherichia coli (strain K12) GN=rpoB PE=1 SV=1 [MASS=150632]  
yde-3-phosphate dehydrogenase A OS=Escherichia coli (strain K12) GN=gapA PE=1 SV=2 [MASS=35532]  
ig protein H-NS OS=Escherichia coli (strain K12) GN=hns PE=1 SV=2 [MASS=15540]  
ydrogenase OS=Escherichia coli (strain K12) GN=mdh PE=1 SV=1 [MASS=32337]  
acyl-carrier-protein] synthase 1 OS=Escherichia coli (strain K12) GN=fabB PE=1 SV=1 [MASS=42613]  
osylformylglycinamide cyclo-ligase OS=Escherichia coli (strain K12) GN=purM PE=1 SV=3 [MASS=36854]  
ranscriptional regulator iscR OS=Escherichia coli (strain K12) GN=iscR PE=1 SV=1 [MASS=17337]  
osylaminoimidazole-succinocarboxamide synthase OS=Escherichia coli (strain K12) GN=purC PE=1 SV=1 [M  
ress protein D OS=Escherichia coli (strain K12) GN=uspD PE=2 SV=1 [MASS=16293]  
e-4-phosphate dehydrogenase OS=Escherichia coli (strain K12) GN=epd PE=1 SV=2 [MASS=37299]  
phosphate dehydrogenase [NAD(P)+] OS=Escherichia coli (strain K12) GN=gpsA PE=3 SV=1 [MASS=36362]  
or OS=Escherichia coli (strain K12) GN=tig PE=1 SV=1 [MASS=48193]  
:charide biosynthesis protein rffA OS=Escherichia coli (strain K12) GN=rffA PE=3 SV=2 [MASS=41901]  
topological specificity factor OS=Escherichia coli (strain K12) GN=minE PE=1 SV=1 [MASS=10235]  
-carrier-protein] reductase [NADH] OS=Escherichia coli (strain K12) GN=fabI PE=1 SV=2 [MASS=27864]  
ress protein F OS=Escherichia coli (strain K12) GN=uspF PE=1 SV=2 [MASS=16017]  
ein OS=Escherichia coli (strain K12) GN=usg PE=1 SV=1 [MASS=36364]  
se-1-phosphate uridylyltransferase OS=Escherichia coli (strain K12) GN=gafF PE=1 SV=1 [MASS=32829]  
oribosyl)-5-[(5-phosphoribosylamino)methylideneamino] imidazole-4-carboxamide isomerase OS=Escheri  
1-semialdehyde 2,1-aminomutase OS=Escherichia coli (strain K12) GN=hemL PE=1 SV=2 [MASS=45366]  
pecific phosphotransferase enzyme IIA component OS=Escherichia coli (strain K12) GN=gatA PE=4 SV=1 [M  
oribosyltransferase OS=Escherichia coli (strain K12) GN=hisG PE=1 SV=1 [MASS=33367]  
olpyruvate-protein phosphotransferase OS=Escherichia coli (strain K12) GN=ptsI PE=1 SV=1 [MASS=63562]  
-phosphate synthase small chain OS=Escherichia coli (strain K12) GN=carA PE=1 SV=1 [MASS=41431]  
ne initiation inhibitor OS=Escherichia coli (strain K12) GN=iciA PE=1 SV=1 [MASS=33472]  
ater dikinase OS=Escherichia coli (strain K12) GN=selD PE=1 SV=1 [MASS=36687]  
xylase OS=Escherichia coli (strain K12) GN=accC PE=1 SV=2 [MASS=49321]

chain-amino-acid aminotransferase OS=Escherichia coli (strain K12) GN=ilvE PE=1 SV=2 [MASS=34094]  
pressor OS=Escherichia coli (strain K12) GN=fruR PE=1 SV=1 [MASS=37999]  
rotease sohB OS=Escherichia coli (strain K12) GN=sohB PE=1 SV=1 [MASS=39366]  
nal protein L5 OS=Escherichia coli (strain K12) GN=rplE PE=1 SV=2 [MASS=20302]  
\ synthetase alpha subunit OS=Escherichia coli (strain K12) GN=glyQ PE=1 SV=2 [MASS=34774]  
rcerate kinase OS=Escherichia coli (strain K12) GN=pgk PE=1 SV=2 [MASS=41118]  
rase OS=Escherichia coli (strain K12) GN=lipA PE=1 SV=1 [MASS=36072]  
uvate aminotransferase OS=Escherichia coli (strain K12) GN=avtA PE=3 SV=3 [MASS=46711]  
dent Clp protease ATP-binding subunit clpX OS=Escherichia coli (strain K12) GN=clpX PE=1 SV=2 [MASS=463  
rized HTH-type transcriptional regulator yciT OS=Escherichia coli (strain K12) GN=yciT PE=4 SV=1 [MASS=27  
l aspartokinase/homoserine dehydrogenase 1 OS=Escherichia coli (strain K12) GN=thrA PE=1 SV=2 [MASS=3  
nal protein L15 OS=Escherichia coli (strain K12) GN=rplO PE=1 SV=1 [MASS=14980]  
A ligase [ADP-forming] subunit beta OS=Escherichia coli (strain K12) GN=sucC PE=1 SV=1 [MASS=41393]  
;D OS=Escherichia coli (strain K12) GN=nagD PE=1 SV=1 [MASS=27163]  
; synthase OS=Escherichia coli (strain K12) GN=metH PE=1 SV=5 [MASS=135997]  
3-methylbut-2-en-1-yl diphosphate synthase OS=Escherichia coli (strain K12) GN=ispG PE=1 SV=1 [MASS=40  
itive aspartokinase 3 OS=Escherichia coli (strain K12) GN=lysC PE=1 SV=2 [MASS=48532]  
r protein ftsZ OS=Escherichia coli (strain K12) GN=ftsZ PE=1 SV=1 [MASS=40324]  
inase 1 OS=Escherichia coli (strain K12) GN=glxK PE=1 SV=1 [MASS=38734]  
A OS=Escherichia coli (strain K12) GN=recA PE=1 SV=2 [MASS=37973]  
NA synthetase OS=Escherichia coli (strain K12) GN=aspS PE=1 SV=1 [MASS=65913]  
g protein lepA OS=Escherichia coli (strain K12) GN=lepA PE=1 SV=1 [MASS=66570]  
thylpyrimidine/phosphomethylpyrimidine kinase OS=Escherichia coli (strain K12) GN=thiD PE=1 SV=1 [MAS  
e kinase OS=Escherichia coli (strain K12) GN=thrB PE=1 SV=2 [MASS=33624]  
nal protein S7 OS=Escherichia coli (strain K12) GN=rpsG PE=1 SV=3 [MASS=20019]  
synthase OS=Escherichia coli (strain K12) GN=thrC PE=1 SV=1 [MASS=47114]  
r synthase beta chain OS=Escherichia coli (strain K12) GN=trpB PE=1 SV=2 [MASS=42983]  
ce regulation protein OS=Escherichia coli (strain K12) GN=fur PE=1 SV=1 [MASS=16795]  
factor Ts OS=Escherichia coli (strain K12) GN=tsf PE=1 SV=2 [MASS=30423]  
juinate synthase OS=Escherichia coli (strain K12) GN=aroB PE=3 SV=1 [MASS=38881]  
racemase OS=Escherichia coli (strain K12) GN=murI PE=1 SV=2 [MASS=31002]  
;sulfurase OS=Escherichia coli (strain K12) GN=iscS PE=1 SV=1 [MASS=45089]  
rized aminotransferase yfbQ OS=Escherichia coli (strain K12) GN=yfbQ PE=1 SV=1 [MASS=45517]  
onophosphate kinase OS=Escherichia coli (strain K12) GN=thiL PE=3 SV=1 [MASS=35071]  
e synthase isozyme 1 large subunit OS=Escherichia coli (strain K12) GN=ilvB PE=1 SV=1 [MASS=60441]  
tylglucosamine 1-carboxyvinyltransferase OS=Escherichia coli (strain K12) GN=murA PE=1 SV=1 [MASS=448  
y/menaquinone biosynthesis methyltransferase ubiE OS=Escherichia coli (strain K12) GN=ubiE PE=1 SV=1 [M  
ase OS=Escherichia coli (strain K12) GN=ackA PE=1 SV=1 [MASS=43290]  
nal protein S10 OS=Escherichia coli (strain K12) GN=rpsJ PE=1 SV=1 [MASS=11736]  
se-1-phosphate uridylyltransferase OS=Escherichia coli (strain K12) GN=galU PE=1 SV=2 [MASS=32942]  
kinase OS=Escherichia coli (strain K12) GN=adk PE=1 SV=1 [MASS=23586]  
acyl-carrier-protein] synthase 2 OS=Escherichia coli (strain K12) GN=fabF PE=1 SV=2 [MASS=43046]  
dehydrogenase flavoprotein subunit OS=Escherichia coli (strain K12) GN=sdhA PE=1 SV=1 [MASS=64422]  
osylglycinamide formyltransferase 2 OS=Escherichia coli (strain K12) GN=purT PE=1 SV=3 [MASS=42434]  
e synthase isozyme 3 large subunit OS=Escherichia coli (strain K12) GN=ilvI PE=1 SV=2 [MASS=62984]  
ylthiazole kinase OS=Escherichia coli (strain K12) GN=thiM PE=3 SV=1 [MASS=27339]  
lenetetrahydrofolate reductase OS=Escherichia coli (strain K12) GN=metF PE=1 SV=1 [MASS=33103]  
rized GTP-binding protein yjiA OS=Escherichia coli (strain K12) GN=yjiA PE=1 SV=3 [MASS=35660]

g protein typA/BipA OS=Escherichia coli (strain K12) GN=typA PE=1 SV=2 [MASS=67355]  
se OS=Escherichia coli (strain K12) GN=pyrG PE=1 SV=2 [MASS=60374]  
phoribosyltransferase OS=Escherichia coli (strain K12) GN=upp PE=1 SV=1 [MASS=22533]  
acid dehydratase OS=Escherichia coli (strain K12) GN=ilvD PE=1 SV=5 [MASS=65532]  
l-tRNA synthetase OS=Escherichia coli (strain K12) GN=asnS PE=1 SV=2 [MASS=52570]  
v synthetase OS=Escherichia coli (strain K12) GN=proS PE=1 SV=4 [MASS=63693]  
synthetase B [glutamine-hydrolyzing] OS=Escherichia coli (strain K12) GN=asnB PE=1 SV=3 [MASS=62659]  
oxymethyltransferase OS=Escherichia coli (strain K12) GN=glyA PE=1 SV=1 [MASS=45317]  
nthase A OS=Escherichia coli (strain K12) GN=cysK PE=1 SV=2 [MASS=34490]  
l protein fold OS=Escherichia coli (strain K12) GN=fold PE=1 SV=4 [MASS=31044]  
=Escherichia coli (strain K12) GN=eno PE=1 SV=2 [MASS=45655]  
c arginine decarboxylase OS=Escherichia coli (strain K12) GN=speA PE=1 SV=2 [MASS=73898]  
l protein hldE OS=Escherichia coli (strain K12) GN=hldE PE=1 SV=1 [MASS=51051]  
methionine synthase OS=Escherichia coli (strain K12) GN=metK PE=1 SV=2 [MASS=41952]  
rized protein yigB OS=Escherichia coli (strain K12) GN=yigB PE=4 SV=1 [MASS=27122]  
:cinate synthetase OS=Escherichia coli (strain K12) GN=purA PE=1 SV=2 [MASS=47345]  
rized ABC transporter ATP-binding protein yjjK OS=Escherichia coli (strain K12) GN=yjjK PE=1 SV=2 [MASS=1  
S=Escherichia coli (strain K12) GN=tyrA PE=1 SV=1 [MASS=42043]  
synthetase OS=Escherichia coli (strain K12) GN=serS PE=1 SV=1 [MASS=48414]  
6-bisphosphatase class 2 OS=Escherichia coli (strain K12) GN=glpX PE=1 SV=1 [MASS=35852]  
ructokinase isozyme 1 OS=Escherichia coli (strain K12) GN=pfkA PE=1 SV=1 [MASS=34842]  
peronin OS=Escherichia coli (strain K12) GN=hsIO PE=1 SV=1 [MASS=32534]  
tRNA synthetase OS=Escherichia coli (strain K12) GN=thrS PE=1 SV=1 [MASS=74014]  
lyzyme A synthetase OS=Escherichia coli (strain K12) GN=acs PE=1 SV=2 [MASS=72094]

IASS=26995]

chia coli (strain K12) GN=hisA PE=1 SV=2 [MASS=26033]

IASS=16907]

356]  
7603]  
89120]

0684]

5S=28634]

.18]  
MASS=28073]



62443]
