# Supplementary material
Source: PubMed Central journal article supplement (PMC5108054)
Supplement: NIHMS436991-supplement-S6_mid_log_pH_1.pdf [file NIHMS436991-supplement-S6_mid_log_pH_1.pdf]

| locus                | log2ratio | lowerCI | upperCI | quantified_peptic | description                           |
|----------------------|-----------|---------|---------|-------------------|---------------------------------------|
| sp_P0A6X3_HFQ_ECOLI  | 4.5       | 4       | 5       | 7                 | Protein hfq OS=Escherichia coli       |
| sp_P0AG67_RS1_ECOLI  | 3.4       | 3.1     | 3.7     | 22                | 30S ribosomal protein S16             |
| sp_P0A7V8_RS4_ECOLI  | 3.1       | 2.5     | 3.8     | 4                 | 30S ribosomal protein S16             |
| sp_P0A6P9_ENO_ECOLI  | 2.3       | 1.7     | 2.9     | 7                 | Enolase OS=Escherichia coli           |
| sp_P30850_RNB_ECOLI  | 2.2       | 1.5     | 3       | 3                 | Exoribonuclease 2 OS=Escherichia coli |
| sp_P02359_RS7_ECOLI  | 2.1       | 1.5     | 2.7     | 6                 | 30S ribosomal protein S16             |
| sp_P0A7D4_PURA_ECOLI | 2         | 1.4     | 2.5     | 9                 | Adenylosuccinate synthetase           |
| sp_P0A7L0_RL1_ECOLI  | 2         | 0.8     | 2.8     | 4                 | 50S ribosomal protein L16             |

chia coli (strain K12) GN=hfq PE=1 SV=2 [MASS=11166]  
51 OS=Escherichia coli (strain K12) GN=rpsA PE=1 SV=1 [MASS=61158]  
54 OS=Escherichia coli (strain K12) GN=rpsD PE=1 SV=2 [MASS=23469]  
i coli (strain K12) GN=eno PE=1 SV=2 [MASS=45655]  
Escherichia coli (strain K12) GN=rnb PE=1 SV=3 [MASS=72491]  
57 OS=Escherichia coli (strain K12) GN=rpsG PE=1 SV=3 [MASS=20019]  
etase OS=Escherichia coli (strain K12) GN=purA PE=1 SV=2 [MASS=47345]  
.1 OS=Escherichia coli (strain K12) GN=rplA PE=1 SV=2 [MASS=24730]
