# Supplementary material
Source: PubMed Central journal article supplement (PMC5108054)
Supplement: NIHMS436991-supplement-S6_stat_pH1_S12.pdf [file NIHMS436991-supplement-S6_stat_pH1_S12.pdf]

| locus                | log2ratio | lowerCI | upperCI | quantified_peptides |
|----------------------|-----------|---------|---------|---------------------|
| sp_P39274_YJDJ_ECOLI | 6.9       | 6.5     | 7       | 8                   |
| sp_P77293_GTRB_ECOLI | 4.8       | 4       | 5.6     | 2                   |
| sp_P76539_YPEA_ECOLI | 3.6       | 2.4     | 7       | 2                   |
| sp_P00579_RPOD_ECOLI | 3.2       | 2.6     | 3.9     | 4                   |
| sp_P0AA43_RSUA_ECOLI | 3         | 2.4     | 3.7     | 5                   |
| sp_P69913_CSRA_ECOLI | 3         | 2.3     | 3.6     | 3                   |
| sp_P0A6X3_HFQ_ECOLI  | 2.6       | 2.1     | 3       | 10                  |
| sp_P0A7Z4_RPOA_ECOLI | 2.6       | 2.3     | 3       | 12                  |
| sp_P0AFF6_NUSA_ECOLI | 2.4       | 1.9     | 3       | 11                  |
| sp_P0A8T7_RPOC_ECOLI | 2.3       | 2.1     | 2.5     | 47                  |
| sp_P0A9K9_SLYD_ECOLI | 2.3       | 1.9     | 2.7     | 9                   |
| sp_P0A887_UBIE_ECOLI | 2.1       | 1.3     | 2.9     | 2                   |
| sp_P21499_RNR_ECOLI  | 2         | 1.3     | 2.8     | 6                   |
| sp_P25714_OXAA_ECOLI | 2         | 1.1     | 3.1     | 2                   |

Numerator: S12 (Light)

Denominator: scrambled (Heavy)

description

Uncharacterized protein yjdJ OS=Escherichia coli (strain K12) GN=yjdJ PE=4 SV=1 [MASS=10468]  
Bactoprenol glucosyl transferase homolog from prophage CPS-53 OS=Escherichia coli (strain K12) GN=yfdH PE=3 SV=1 [MASS=16312]  
Acetyltransferase ypeA OS=Escherichia coli (strain K12) GN=ypeA PE=3 SV=2 [MASS=16312]  
RNA polymerase sigma factor rpoD OS=Escherichia coli (strain K12) GN=rpoD PE=1 SV=2 [MASS=70263]  
Ribosomal small subunit pseudouridine synthase A OS=Escherichia coli (strain K12) GN=rsuA PE=1 SV=1 [MASS=6856]  
Carbon storage regulator OS=Escherichia coli (strain K12) GN=csrA PE=1 SV=1 [MASS=6856]  
Protein hfq OS=Escherichia coli (strain K12) GN=hfq PE=1 SV=2 [MASS=11166]  
DNA-directed RNA polymerase subunit alpha OS=Escherichia coli (strain K12) GN=rpoA PE=1 SV=1 [MASS=54871]  
Transcription elongation protein nusA OS=Escherichia coli (strain K12) GN=nusA PE=1 SV=1 [MASS=54871]  
DNA-directed RNA polymerase subunit beta' OS=Escherichia coli (strain K12) GN=rpoC PE=1 SV=1 [MASS=54871]  
FKBP-type peptidyl-prolyl cis-trans isomerase slyD OS=Escherichia coli (strain K12) GN=slyD PE=1 SV=1 [MASS=92109]  
Ubiquinone/menaquinone biosynthesis methyltransferase ubiE OS=Escherichia coli (strain K12) GN=ubiE PE=1 SV=1 [MASS=92109]  
Ribonuclease R OS=Escherichia coli (strain K12) GN=rnr PE=1 SV=2 [MASS=92109]  
Inner membrane protein oxaA OS=Escherichia coli (strain K12) GN=oxaA PE=1 SV=2 [MASS=61526]

† PE=1 SV=1 [MASS=34635]

MASS=25865]

36512]

|

155160]

ASS=20853]

'E=1 SV=1 [MASS=28073]
