# Supplementary material
Source: PubMed Central journal article supplement (PMC5108054)
Supplement: NIHMS436991-supplement-S6_stat_pH2_S12.pdf [file NIHMS436991-supplement-S6_stat_pH2_S12.pdf]

| locus                | log2ratio | lowerCL | upperCI | quantified_peptides |
|----------------------|-----------|---------|---------|---------------------|
| sp_P67762_YHBP_ECOLI | 4.3       | 3.6     | 4.9     | 3                   |
| sp_P0A6X7_IHFA_ECOLI | 3.6       | 2.8     | 7       | 2                   |
| sp_P21499_RNR_ECOLI  | 3.3       | 2.9     | 3.8     | 15                  |
| sp_P69913_CSRA_ECOLI | 3.1       | 0.7     | 4.2     | 2                   |
| sp_P0A7L0_RL1_ECOLI  | 3         | 2.6     | 3.5     | 19                  |
| sp_P0A8R0_RRAA_ECOLI | 2.8       | 1.7     | 7       | 2                   |
| sp_P0AEJ2_ENTC_ECOLI | 2.8       | 2.2     | 3.6     | 5                   |
| sp_P0A6X3_HFQ_ECOLI  | 2.3       | 1.8     | 2.8     | 5                   |
| sp_P0A7V8_RS4_ECOLI  | 2.1       | 1.7     | 2.5     | 9                   |
| sp_P0AG67_RS1_ECOLI  | 2.1       | 1.8     | 2.4     | 30                  |
| sp_P37765_RLUB_ECOLI | 2.1       | 1.4     | 7       | 3                   |

Numerator: Scrambled (Heavy)  
Denominator: S12 (light)

description

UPF0306 protein yhbP OS=Escherichia coli (strain K12) GN=yhbP PE=3 SV=1 [MASS=16776]  
Integration host factor subunit alpha OS=Escherichia coli (strain K12) GN=ihfA PE=1 SV=1 [MASS=11354]  
Ribonuclease R OS=Escherichia coli (strain K12) GN=rnr PE=1 SV=2 [MASS=92109]  
Carbon storage regulator OS=Escherichia coli (strain K12) GN=csrA PE=1 SV=1 [MASS=6856]  
50S ribosomal protein L1 OS=Escherichia coli (strain K12) GN=rplA PE=1 SV=2 [MASS=24730]  
Regulator of ribonuclease activity A OS=Escherichia coli (strain K12) GN=rraA PE=1 SV=1 [MASS=17360]  
Isochorismate synthase entC OS=Escherichia coli (strain K12) GN=entC PE=1 SV=1 [MASS=42932]  
Protein hfq OS=Escherichia coli (strain K12) GN=hfq PE=1 SV=2 [MASS=11166]  
30S ribosomal protein S4 OS=Escherichia coli (strain K12) GN=rpsD PE=1 SV=2 [MASS=23469]  
30S ribosomal protein S1 OS=Escherichia coli (strain K12) GN=rpsA PE=1 SV=1 [MASS=61158]  
Ribosomal large subunit pseudouridine synthase B OS=Escherichia coli (strain K12) GN=rluB PE=1 SV=2

[MASS=32711]
