# Supplementary material
Source: PubMed Central journal article supplement (PMC5108054)
Supplement: NIHMS436991-supplement-S6_stat_phase_1_total.pdf [file NIHMS436991-supplement-S6_stat_phase_1_total.pdf]

| locus                        | log2ratio | lowerCI | upperCI | quantified_ | description       |
|------------------------------|-----------|---------|---------|-------------|-------------------|
| sp_P39274_YJDJ_ECOLI         | 6.9       | 6.5     | 7       | 8           | Uncharacte        |
| sp_P77293_GTRB_ECOLI         | 4.8       | 4       | 5.6     | 2           | Bactopreno        |
| sp_P76539_YPEA_ECOLI         | 3.6       | 2.4     | 7       | 2           | Acetyltrans       |
| sp_P00579_RPOD_ECOLI         | 3.2       | 2.6     | 3.9     | 4           | RNA polym         |
| REVERSE_sp_POA6A0_UBIB_ECOLI | 3         | 1.7     | 7       | 2           | Reverse sec       |
| sp_POAA43_RSUA_ECOLI         | 3         | 2.4     | 3.7     | 5           | Ribosomal s       |
| sp_P69913_CSRA_ECOLI         | 3         | 2.3     | 3.6     | 3           | Carbon stor       |
| sp_POA6X3_HFQ_ECOLI          | 2.6       | 2.1     | 3       | 10          | Protein hfq       |
| sp_POA7Z4_RPOA_ECOLI         | 2.6       | 2.3     | 3       | 12          | DNA-direct        |
| sp_POAFF6_NUSA_ECOLI         | 2.4       | 1.9     | 3       | 11          | Transcripti       |
| sp_POA8T7_RPOC_ECOLI         | 2.3       | 2.1     | 2.5     | 47          | DNA-direct        |
| sp_POA9K9_SLYD_ECOLI         | 2.3       | 1.9     | 2.7     | 9           | FKBP-type $\beta$ |
| sp_POA887_UBIE_ECOLI         | 2.1       | 1.3     | 2.9     | 2           | Ubiquinone        |
| sp_P21499_RNR_ECOLI          | 2         | 1.3     | 2.8     | 6           | Ribonuclea        |
| sp_P25714_OXAA_ECOLI         | 2         | 1.1     | 3.1     | 2           | Inner mem         |
| sp_P07001_PNTA_ECOLI         | 1.7       | 1.2     | 2.3     | 6           | NAD(P) trar       |
| sp_POABA0_ATPF_ECOLI         | 1.6       | 0.9     | 2.4     | 3           | ATP syntha        |
| sp_P02359_RS7_ECOLI          | 1.5       | 1.2     | 1.9     | 15          | 30S riboson       |
| sp_POADZ7_YAJC_ECOLI         | 1.5       | 0.7     | 2.3     | 2           | UPF0092 m         |
| sp_P21513_RNE_ECOLI          | 1.5       | 0.8     | 2.3     | 4           | Ribonuclea        |
| sp_POA7S9_RS13_ECOLI         | 1.4       | 0.7     | 2.2     | 3           | 30S riboson       |
| sp_POA8V2_RPOB_ECOLI         | 1.4       | 1.1     | 1.6     | 45          | DNA-direct        |
| sp_P60438_RL3_ECOLI          | 1.4       | 0.6     | 2.1     | 6           | 50S riboson       |
| sp_POA7L3_RL20_ECOLI         | 1.3       | 0.2     | 2.6     | 2           | 50S riboson       |
| sp_POABB0_ATPA_ECOLI         | 1.3       | 0.9     | 1.7     | 13          | ATP syntha        |
| sp_POABB4_ATPB_ECOLI         | 1.3       | 1       | 1.6     | 18          | ATP syntha        |
| sp_P28635_METQ_ECOLI         | 1.3       | 1       | 1.6     | 17          | D-methioni        |
| sp_P0C0S1_MSCS_ECOLI         | 1.2       | 0.6     | 1.7     | 5           | Small-condi       |
| sp_POAAI3_FTSH_ECOLI         | 1.1       | 0.1     | 2.1     | 2           | Cell division     |
| sp_POAC41_DHSA_ECOLI         | 1.1       | 0.2     | 2.1     | 2           | Succinate d       |
| sp_POA7K2_RL7_ECOLI          | 1         | 0.2     | 1.8     | 3           | 50S riboson       |
| sp_POA7T3_RS16_ECOLI         | 1         | 0.4     | 1.5     | 5           | 30S riboson       |
| sp_P60422_RL2_ECOLI          | 0.7       | -0.1    | 1.6     | 3           | 50S riboson       |
| sp_POADZ4_RS15_ECOLI         | 0.6       | 0       | 1.3     | 4           | 30S riboson       |
| sp_POA7W1_RS5_ECOLI          | 0.4       | -0.4    | 1.2     | 2           | 30S riboson       |
| sp_POADY7_RL16_ECOLI         | 0.4       | -0.5    | 1.4     | 2           | 50S riboson       |
| sp_P25526_GABD_ECOLI         | 0.4       | -0.6    | 1.5     | 2           | Succinate-s       |
| sp_POA7V8_RS4_ECOLI          | 0.2       | -0.1    | 0.6     | 13          | 30S riboson       |
| sp_P67910_HLDD_ECOLI         | 0.2       | -0.1    | 0.4     | 30          | ADP-L-glyce       |
| sp_POA7L0_RL1_ECOLI          | 0.1       | -0.2    | 0.5     | 13          | 50S riboson       |
| sp_POAG55_RL6_ECOLI          | 0         | -0.6    | 0.7     | 5           | 50S riboson       |
| sp_POAG67_RS1_ECOLI          | 0         | -0.3    | 0.3     | 31          | 30S riboson       |
| sp_POAGK8_ISCR_ECOLI         | -0.2      | -1.2    | 0.9     | 2           | HTH-type tr       |
| sp_P04968_THD1_ECOLI         | -0.5      | -1.5    | 0.5     | 2           | Threonine c       |
| sp_POA7R9_RS11_ECOLI         | -0.5      | -1.4    | 0.2     | 3           | 30S riboson       |
| sp_POAA10_RL13_ECOLI         | -0.5      | -1.3    | 0.3     | 4           | 50S riboson       |
| sp_POABD8_BCCP_ECOLI         | -0.5      | -1      | -0.1    | 8           | Biotin carb       |

|                      |      |      |      |                 |
|----------------------|------|------|------|-----------------|
| sp_POA8F0_UPP_ECOLI  | -0.6 | -1.5 | 0.2  | 2 Uracil phosj  |
| sp_POAAI5_FABF_ECOLI | -0.6 | -1.2 | 0.1  | 3 3-oxoacyl-[ε  |
| sp_P06996_OMPC_ECOLI | -0.7 | -1.5 | 0.1  | 2 Outer mem     |
| sp_POA910_OMPA_ECOLI | -0.7 | -2.1 | 0.6  | 2 Outer mem     |
| sp_P62399_RL5_ECOLI  | -0.7 | -1.3 | -0.1 | 5 50S riboson   |
| sp_P76423_THIM_ECOLI | -0.7 | -1.2 | -0.2 | 7 Hydroxyeth    |
| sp_POA6Y8_DNAK_ECOLI | -0.8 | -1.7 | 0.2  | 2 Chaperone     |
| sp_P11458_NADA_ECOLI | -0.8 | -1.6 | 0    | 4 Quinolinate   |
| sp_P69783_PTGA_ECOLI | -0.8 | -1.6 | 0    | 2 Glucose-spe   |
| sp_POAF24_NAGD_ECOLI | -1   | -1.4 | -0.6 | 9 Protein nag   |
| sp_POA7J7_RL11_ECOLI | -1.1 | -1.8 | -0.4 | 3 50S riboson   |
| sp_POA7V3_RS3_ECOLI  | -1.1 | -1.4 | -0.7 | 13 30S riboson  |
| sp_POABK5_CYSK_ECOLI | -1.1 | -1.8 | -0.2 | 6 Cysteine syi  |
| sp_P00934_THRC_ECOLI | -1.2 | -2.5 | -0.3 | 4 Threonine s   |
| sp_POA7D7_PUR7_ECOLI | -1.2 | -2   | -0.4 | 2 Phosphorib    |
| sp_POA8C1_YBJQ_ECOLI | -1.2 | -1.9 | -0.6 | 3 UPF0145 pr    |
| sp_POA9Q1_ARCA_ECOLI | -1.2 | -1.9 | -0.4 | 5 Aerobic resj  |
| sp_POAEJ6_EUTB_ECOLI | -1.2 | -1.8 | -0.5 | 4 Ethanolami    |
| sp_POA698_UVRA_ECOLI | -1.3 | -1.8 | -0.8 | 8 UvrABC syst   |
| sp_POAEZ3_MIND_ECOLI | -1.3 | -2.6 | -0.2 | 2 Septum site   |
| sp_P23538_PPSA_ECOLI | -1.5 | -1.8 | -1.1 | 13 Phosphoeni   |
| sp_POA7R5_RS10_ECOLI | -1.6 | -2   | -1.2 | 13 30S riboson  |
| sp_POAAV4_YBGJ_ECOLI | -1.6 | -2.6 | -0.5 | 2 Uncharacte    |
| sp_P12758_UDP_ECOLI  | -1.6 | -7   | -0.1 | 3 Uridine pho   |
| sp_P60595_HIS5_ECOLI | -1.6 | -2.6 | -0.7 | 3 Imidazole g   |
| sp_P60723_RL4_ECOLI  | -1.6 | -2   | -1.1 | 8 50S riboson   |
| sp_P62620_ISPG_ECOLI | -1.6 | -2.3 | -1   | 5 4-hydroxy-ε   |
| sp_P77444_SUFS_ECOLI | -1.6 | -2.5 | -0.8 | 2 Cysteine de   |
| sp_P08178_PUR5_ECOLI | -1.7 | -2.2 | -1.1 | 5 Phosphorib    |
| sp_P25665_METE_ECOLI | -1.8 | -2.2 | -1.4 | 14 5-methyltet  |
| sp_P30139_THIG_ECOLI | -1.8 | -7   | -0.8 | 2 Thiazole syr  |
| sp_P00968_CARB_ECOLI | -1.9 | -2.1 | -1.7 | 32 Carbamoyl-   |
| sp_POA879_TRPB_ECOLI | -1.9 | -2.3 | -1.5 | 22 Tryptophan   |
| sp_P68919_RL25_ECOLI | -1.9 | -2.6 | -1.2 | 4 50S riboson   |
| sp_POA6M8_EFG_ECOLI  | -2   | -2.4 | -1.6 | 11 Elongation i |
| sp_P42641_OBG_ECOLI  | -2   | -7   | -1.1 | 2 GTPase obg    |
| sp_P76658_HLDE_ECOLI | -2   | -7   | -0.1 | 2 Bifunctiona   |
| sp_POA6F1_CARA_ECOLI | -2.1 | -3   | -1   | 3 Carbamoyl-    |
| sp_POAG48_RL21_ECOLI | -2.1 | -2.9 | -0.9 | 3 50S riboson   |
| sp_P08244_PYRF_ECOLI | -2.2 | -2.7 | -1.6 | 6 Orotidine 5'  |
| sp_POAEJ2_ENTC_ECOLI | -2.2 | -2.8 | -1.6 | 6 Isochorisma   |
| sp_P60757_HIS1_ECOLI | -2.2 | -2.9 | -1.6 | 3 ATP phosph    |
| sp_POA734_MINE_ECOLI | -2.3 | -2.9 | -1.8 | 5 Cell division |
| sp_POA817_METK_ECOLI | -2.4 | -2.7 | -2.2 | 40 S-adenosylr  |
| sp_POADZ0_RL23_ECOLI | -2.4 | -3.2 | -1.7 | 2 50S riboson   |
| sp_POA7K6_RL19_ECOLI | -2.5 | -3.2 | -1.7 | 4 50S riboson   |
| sp_POAEP3_GALU_ECOLI | -2.8 | -3.4 | -2.3 | 5 UTP--glucos   |
| sp_POA6P9_ENO_ECOLI  | -2.9 | -3.6 | -2.4 | 4 Enolase OS-   |

|                              |      |      |      |                 |
|------------------------------|------|------|------|-----------------|
| sp_P0A9Q7_ADHE_ECOLI         | -2.9 | -4   | -1.8 | 2 Aldehyde-a    |
| sp_P0AG30_RHO_ECOLI          | -3.3 | -4.1 | -2.5 | 3 Transcriptic  |
| sp_P08779_K1C16_HUMAN        | -3.4 | -7   | -2.8 | 4 Keratin, typ  |
| sp_P0A6B7_ISCS_ECOLI         | -3.6 | -4.7 | -2.2 | 2 Cysteine de   |
| sp_P21170_SPEA_ECOLI         | -3.6 | -4.1 | -3.1 | 10 Biosyntheti  |
| sp_P02533_K1C14_HUMAN        | -3.7 | -4.8 | -2.8 | 4 Keratin, typ  |
| sp_P0A850_TIG_ECOLI          | -3.7 | -4.8 | -2.6 | 3 Trigger fact  |
| sp_P0A825_GLYA_ECOLI         | -4.1 | -4.5 | -3.7 | 13 Serine hydr  |
| REVERSE_sp_P19778_YI23_ECOLX | -5.1 | -5.8 | -4.6 | 16 Reverse sec  |
| sp_P35908_K22E_HUMAN         | -5.1 | -6.7 | -4.3 | 12 Keratin, typ |
| sp_P13645_K1C10_HUMAN        | -5.3 | -5.9 | -4.5 | 27 Keratin, typ |
| sp_P0A6Y5_HSLO_ECOLI         | -5.5 | -6   | -5.1 | 15 33 kDa chaç  |
| sp_P00761_TRYP_PIG           | -5.6 | -5.9 | -5.3 | 59 Trypsin OS=  |
| sp_P35527_K1C9_HUMAN         | -5.9 | -6.3 | -5.5 | 28 Keratin, typ |
| sp_P04264_K2C1_HUMAN         | -6   | -6.3 | -5.7 | 51 Keratin, typ |
| sp_P67762_YHBP_ECOLI         | -6   | -6.8 | -4.9 | 3 UPF0306 pr    |
| sp_P16659_SYP_ECOLI          | -7   | -7   | -3.1 | 6 Prolyl-tRNA   |

urized protein yjdJ OS=Escherichia coli (strain K12) GN=yjdJ PE=4 SV=1 [MASS=10468]  
glucosyl transferase homolog from prophage CPS-53 OS=Escherichia coli (strain K12) GN=yfdH PE=1 SV=1  
ferase ypeA OS=Escherichia coli (strain K12) GN=ypeA PE=3 SV=2 [MASS=16312]  
erase sigma factor rpoD OS=Escherichia coli (strain K12) GN=rpoD PE=1 SV=2 [MASS=70263]  
quence, was Probable ubiquinone biosynthesis protein ubiB OS=Escherichia coli (strain K12) GN=ubiB PE=1  
small subunit pseudouridine synthase A OS=Escherichia coli (strain K12) GN=rsuA PE=1 SV=1 [MASS=25865]  
rage regulator OS=Escherichia coli (strain K12) GN=csrA PE=1 SV=1 [MASS=6856]  
OS=Escherichia coli (strain K12) GN=hfq PE=1 SV=2 [MASS=11166]  
ed RNA polymerase subunit alpha OS=Escherichia coli (strain K12) GN=rpoA PE=1 SV=1 [MASS=36512]  
on elongation protein nusA OS=Escherichia coli (strain K12) GN=nusA PE=1 SV=1 [MASS=54871]  
ed RNA polymerase subunit beta' OS=Escherichia coli (strain K12) GN=rpoC PE=1 SV=1 [MASS=155160]  
eptidyl-prolyl cis-trans isomerase slyD OS=Escherichia coli (strain K12) GN=slyD PE=1 SV=1 [MASS=20853]  
y/menaquinone biosynthesis methyltransferase ubiE OS=Escherichia coli (strain K12) GN=ubiE PE=1 SV=1 [M  
se R OS=Escherichia coli (strain K12) GN=rnr PE=1 SV=2 [MASS=92109]  
brane protein oxaA OS=Escherichia coli (strain K12) GN=oxaA PE=1 SV=2 [MASS=61526]  
rshydrogenase subunit alpha OS=Escherichia coli (strain K12) GN=pntA PE=1 SV=2 [MASS=54623]  
se subunit b OS=Escherichia coli (strain K12) GN=atpF PE=1 SV=1 [MASS=17264]  
nal protein S7 OS=Escherichia coli (strain K12) GN=rpsG PE=1 SV=3 [MASS=20019]  
embrane protein yajC OS=Escherichia coli (strain K12) GN=yajC PE=1 SV=1 [MASS=11887]  
se E OS=Escherichia coli (strain K12) GN=rne PE=1 SV=6 [MASS=118197]  
nal protein S13 OS=Escherichia coli (strain K12) GN=rpsM PE=1 SV=2 [MASS=13099]  
ed RNA polymerase subunit beta OS=Escherichia coli (strain K12) GN=rpoB PE=1 SV=1 [MASS=150632]  
nal protein L3 OS=Escherichia coli (strain K12) GN=rpIC PE=1 SV=1 [MASS=22244]  
nal protein L20 OS=Escherichia coli (strain K12) GN=rpIT PE=1 SV=2 [MASS=13497]  
se subunit alpha OS=Escherichia coli (strain K12) GN=atpA PE=1 SV=1 [MASS=55222]  
se subunit beta OS=Escherichia coli (strain K12) GN=atpD PE=1 SV=2 [MASS=50325]  
ne-binding lipoprotein metQ OS=Escherichia coli (strain K12) GN=metQ PE=1 SV=2 [MASS=29432]  
uctance mechanosensitive channel OS=Escherichia coli (strain K12) GN=mscS PE=1 SV=1 [MASS=30896]  
r protease ftsH OS=Escherichia coli (strain K12) GN=ftsH PE=1 SV=1 [MASS=70708]  
ehydrogenase flavoprotein subunit OS=Escherichia coli (strain K12) GN=sdhA PE=1 SV=1 [MASS=64422]  
nal protein L7/L12 OS=Escherichia coli (strain K12) GN=rpIL PE=1 SV=2 [MASS=12295]  
nal protein S16 OS=Escherichia coli (strain K12) GN=rpsP PE=1 SV=1 [MASS=9191]  
nal protein L2 OS=Escherichia coli (strain K12) GN=rpIB PE=1 SV=2 [MASS=29860]  
nal protein S15 OS=Escherichia coli (strain K12) GN=rpsO PE=1 SV=2 [MASS=10269]  
nal protein S5 OS=Escherichia coli (strain K12) GN=rpsE PE=1 SV=2 [MASS=17603]  
nal protein L16 OS=Escherichia coli (strain K12) GN=rpIP PE=1 SV=1 [MASS=15281]  
emialdehyde dehydrogenase [NADP+] OS=Escherichia coli (strain K12) GN=gabD PE=1 SV=1 [MASS=51720]  
nal protein S4 OS=Escherichia coli (strain K12) GN=rpsD PE=1 SV=2 [MASS=23469]  
ero-D-manno-heptose-6-epimerase OS=Escherichia coli (strain K12) GN=hldD PE=1 SV=1 [MASS=34893]  
nal protein L1 OS=Escherichia coli (strain K12) GN=rpIA PE=1 SV=2 [MASS=24730]  
nal protein L6 OS=Escherichia coli (strain K12) GN=rpIF PE=1 SV=2 [MASS=18904]  
nal protein S1 OS=Escherichia coli (strain K12) GN=rpsA PE=1 SV=1 [MASS=61158]  
ranscriptional regulator iscR OS=Escherichia coli (strain K12) GN=iscR PE=1 SV=1 [MASS=17337]  
dehydratase biosynthetic OS=Escherichia coli (strain K12) GN=ilvA PE=1 SV=1 [MASS=56195]  
nal protein S11 OS=Escherichia coli (strain K12) GN=rpsK PE=1 SV=2 [MASS=13845]  
nal protein L13 OS=Escherichia coli (strain K12) GN=rpIM PE=1 SV=1 [MASS=16019]  
oxyl carrier protein of acetyl-CoA carboxylase OS=Escherichia coli (strain K12) GN=accB PE=1 SV=1 [MASS=1

phoribosyltransferase OS=Escherichia coli (strain K12) GN=upp PE=1 SV=1 [MASS=22533]  
acyl-carrier-protein] synthase 2 OS=Escherichia coli (strain K12) GN=fabF PE=1 SV=2 [MASS=43046]  
lbrane protein C OS=Escherichia coli (strain K12) GN=ompC PE=1 SV=1 [MASS=40368]  
lbrane protein A OS=Escherichia coli (strain K12) GN=ompA PE=1 SV=1 [MASS=37201]  
nal protein L5 OS=Escherichia coli (strain K12) GN=rpIE PE=1 SV=2 [MASS=20302]  
ylthiazole kinase OS=Escherichia coli (strain K12) GN=thiM PE=3 SV=1 [MASS=27339]  
protein dnaK OS=Escherichia coli (strain K12) GN=dnaK PE=1 SV=2 [MASS=69115]  
 synthase A OS=Escherichia coli (strain K12) GN=nadA PE=1 SV=3 [MASS=38241]  
pecific phosphotransferase enzyme IIA component OS=Escherichia coli (strain K12) GN=crr PE=1 SV=2 [MASS  
D OS=Escherichia coli (strain K12) GN=nagD PE=1 SV=1 [MASS=27163]  
nal protein L11 OS=Escherichia coli (strain K12) GN=rpLK PE=1 SV=2 [MASS=14875]  
nal protein S3 OS=Escherichia coli (strain K12) GN=rpsC PE=1 SV=2 [MASS=25983]  
nthase A OS=Escherichia coli (strain K12) GN=cysK PE=1 SV=2 [MASS=34490]  
ynthase OS=Escherichia coli (strain K12) GN=thrC PE=1 SV=1 [MASS=47114]  
osylaminoimidazole-succinocarboxamide synthase OS=Escherichia coli (strain K12) GN=purC PE=1 SV=1 [M  
rotein ybjQ OS=Escherichia coli (strain K12) GN=ybjQ PE=1 SV=1 [MASS=11437]  
puration control protein ArcA OS=Escherichia coli (strain K12) GN=arcA PE=1 SV=1 [MASS=27292]  
ne ammonia-lyase heavy chain OS=Escherichia coli (strain K12) GN=eutB PE=1 SV=1 [MASS=49403]  
tem protein A OS=Escherichia coli (strain K12) GN=uvrA PE=1 SV=1 [MASS=103868]  
e-determining protein minD OS=Escherichia coli (strain K12) GN=minD PE=1 SV=2 [MASS=29614]  
olpyruvate synthase OS=Escherichia coli (strain K12) GN=ppsA PE=1 SV=5 [MASS=87435]  
nal protein S10 OS=Escherichia coli (strain K12) GN=rpsJ PE=1 SV=1 [MASS=11736]  
rized protein ybgJ OS=Escherichia coli (strain K12) GN=ybgJ PE=4 SV=1 [MASS=23947]  
osphorylase OS=Escherichia coli (strain K12) GN=udp PE=1 SV=3 [MASS=27159]  
lycerol phosphate synthase subunit hisH OS=Escherichia coli (strain K12) GN=hisH PE=1 SV=1 [MASS=2165  
nal protein L4 OS=Escherichia coli (strain K12) GN=rpID PE=1 SV=1 [MASS=22087]  
3-methylbut-2-en-1-yl diphosphate synthase OS=Escherichia coli (strain K12) GN=ispG PE=1 SV=1 [MASS=4  
sulfurase OS=Escherichia coli (strain K12) GN=sufS PE=1 SV=1 [MASS=44434]  
osylformylglycinamidine cyclo-ligase OS=Escherichia coli (strain K12) GN=purM PE=1 SV=3 [MASS=36854]  
trahydropteroyltryglutamate--homocysteine methyltransferase OS=Escherichia coli (strain K12) GN=metE P  
nthase OS=Escherichia coli (strain K12) GN=thiG PE=1 SV=3 [MASS=26896]  
hosphate synthase large chain OS=Escherichia coli (strain K12) GN=carB PE=1 SV=2 [MASS=117842]  
 synthase beta chain OS=Escherichia coli (strain K12) GN=trpB PE=1 SV=2 [MASS=42983]  
nal protein L25 OS=Escherichia coli (strain K12) GN=rpLY PE=1 SV=1 [MASS=10693]  
factor G OS=Escherichia coli (strain K12) GN=fusA PE=1 SV=2 [MASS=77581]  
E/cgtA OS=Escherichia coli (strain K12) GN=obgE PE=1 SV=1 [MASS=43286]  
l protein hldE OS=Escherichia coli (strain K12) GN=hldE PE=1 SV=1 [MASS=51051]  
hosphate synthase small chain OS=Escherichia coli (strain K12) GN=carA PE=1 SV=1 [MASS=41431]  
nal protein L21 OS=Escherichia coli (strain K12) GN=rpIU PE=1 SV=1 [MASS=11564]  
-phosphate decarboxylase OS=Escherichia coli (strain K12) GN=pyrF PE=1 SV=1 [MASS=26350]  
ate synthase entC OS=Escherichia coli (strain K12) GN=entC PE=1 SV=1 [MASS=42932]  
oribosyltransferase OS=Escherichia coli (strain K12) GN=hisG PE=1 SV=1 [MASS=33367]  
 topological specificity factor OS=Escherichia coli (strain K12) GN=minE PE=1 SV=1 [MASS=10235]  
methionine synthase OS=Escherichia coli (strain K12) GN=metK PE=1 SV=2 [MASS=41952]  
nal protein L23 OS=Escherichia coli (strain K12) GN=rpIW PE=1 SV=1 [MASS=11199]  
nal protein L19 OS=Escherichia coli (strain K12) GN=rpIS PE=1 SV=2 [MASS=13133]  
se-1-phosphate uridylyltransferase OS=Escherichia coli (strain K12) GN=galU PE=1 SV=2 [MASS=32942]  
=Escherichia coli (strain K12) GN=eno PE=1 SV=2 [MASS=45655]

lcohol dehydrogenase OS=Escherichia coli (strain K12) GN=adhE PE=1 SV=2 [MASS=96127]  
on termination factor rho OS=Escherichia coli (strain K12) GN=rho PE=1 SV=1 [MASS=47004]  
ie I cytoskeletal 16 OS=Homo sapiens GN=KRT16 PE=1 SV=4 [MASS=51268]  
sulfurase OS=Escherichia coli (strain K12) GN=iscS PE=1 SV=1 [MASS=45089]  
c arginine decarboxylase OS=Escherichia coli (strain K12) GN=speA PE=1 SV=2 [MASS=73898]  
ie I cytoskeletal 14 OS=Homo sapiens GN=KRT14 PE=1 SV=4 [MASS=51561]  
or OS=Escherichia coli (strain K12) GN=tig PE=1 SV=1 [MASS=48193]  
oxymethyltransferase OS=Escherichia coli (strain K12) GN=glyA PE=1 SV=1 [MASS=45317]  
quence, was Insertion element IS2 uncharacterized 11.1 kDa protein OS=Escherichia coli PE=4 SV=1 [MASS=  
ie II cytoskeletal 2 epidermal OS=Homo sapiens GN=KRT2 PE=1 SV=2 [MASS=65433]  
ie I cytoskeletal 10 OS=Homo sapiens GN=KRT10 PE=1 SV=6 [MASS=58827]  
peronin OS=Escherichia coli (strain K12) GN=hsIO PE=1 SV=1 [MASS=32534]  
-Sus scrofa PE=1 SV=1 [MASS=24409]  
ie I cytoskeletal 9 OS=Homo sapiens GN=KRT9 PE=1 SV=3 [MASS=62064]  
ie II cytoskeletal 1 OS=Homo sapiens GN=KRT1 PE=1 SV=6 [MASS=66039]  
rotein yhbP OS=Escherichia coli (strain K12) GN=yhbP PE=3 SV=1 [MASS=16776]  
c synthetase OS=Escherichia coli (strain K12) GN=proS PE=1 SV=4 [MASS=63693]

[MASS=34635]

SV=1 [MASS=63203]  
]

MASS=28073]

[6687]

;-18251]

IASS=26995]

3]

0684]

E=1 SV=6 [MASS=84674]



=11147]
