# Supplementary material
Source: PubMed Central journal article supplement (PMC5108054)
Supplement: NIHMS436991-supplement-S6_stat_phase_2_total.pdf [file NIHMS436991-supplement-S6_stat_phase_2_total.pdf]

| locus                | log2ratio | lowerCI | upperCI | quantified_ | description  |
|----------------------|-----------|---------|---------|-------------|--------------|
| sp_P67762_YHBP_ECOLI | 4.3       | 3.6     | 4.9     | 3           | UPF0306 pr   |
| sp_POA6X7_IHFA_ECOLI | 3.6       | 2.8     | 7       | 2           | Integration  |
| sp_P21499_RNR_ECOLI  | 3.3       | 2.9     | 3.8     | 15          | Ribonucleas  |
| sp_P69913_CSRA_ECOLI | 3.1       | -0.7    | 4.2     | 2           | Carbon stor  |
| sp_POA7L0_RL1_ECOLI  | 3         | 2.6     | 3.5     | 19          | 50S riboson  |
| sp_POA8R0_RRAA_ECOLI | 2.8       | 1.7     | 7       | 2           | Regulator o  |
| sp_POAEJ2_ENTC_ECOLI | 2.8       | 2.2     | 3.6     | 5           | Isochorisma  |
| sp_POA6X3_HFQ_ECOLI  | 2.3       | 1.8     | 2.8     | 5           | Protein hfq  |
| sp_POA7V8_RS4_ECOLI  | 2.1       | 1.7     | 2.5     | 9           | 30S riboson  |
| sp_POAG67_RS1_ECOLI  | 2.1       | 1.8     | 2.4     | 30          | 30S riboson  |
| sp_P37765_RLUB_ECOLI | 2.1       | 1.4     | 7       | 3           | Ribosomal l  |
| sp_P76550_YFFS_ECOLI | 1.8       | 0.2     | 7       | 2           | Uncharacte   |
| sp_PO0888_AROF_ECOLI | 1.7       | 0.7     | 3       | 2           | Phospho-2-   |
| sp_POADZ4_RS15_ECOLI | 1.6       | 1       | 2.2     | 4           | 30S riboson  |
| sp_POACF0_DBHA_ECOLI | 1.5       | 1       | 2.2     | 6           | DNA-bindin   |
| sp_POA8C1_YBJQ_ECOLI | 0.9       | 0       | 1.8     | 3           | UPF0145 pr   |
| sp_POAGJ5_YFIF_ECOLI | 0.9       | -0.3    | 2.3     | 2           | Uncharacte   |
| sp_POA7V3_RS3_ECOLI  | 0.7       | 0.1     | 1.4     | 4           | 30S riboson  |
| sp_POA7W1_RS5_ECOLI  | 0.7       | 0.3     | 1.2     | 12          | 30S riboson  |
| sp_POA6R3_FIS_ECOLI  | 0.6       | -0.3    | 1.5     | 2           | DNA-bindin   |
| sp_POA7S9_RS13_ECOLI | 0.5       | 0       | 0.9     | 9           | 30S riboson  |
| sp_P10908_UGPQ_ECOLI | 0.5       | -0.5    | 1.4     | 2           | Glyceropho   |
| sp_POA6B7_ISCS_ECOLI | 0.4       | -0.4    | 1.3     | 5           | Cysteine de  |
| sp_P60422_RL2_ECOLI  | 0.4       | -0.8    | 1.6     | 2           | 50S riboson  |
| sp_POA7W7_RS8_ECOLI  | 0.3       | -0.9    | 1.5     | 2           | 30S riboson  |
| sp_POA6A3_ACKA_ECOLI | 0.2       | -0.6    | 1.1     | 2           | Acetate kin  |
| sp_P60723_RL4_ECOLI  | 0.2       | -0.3    | 0.7     | 9           | 50S riboson  |
| sp_P02359_RS7_ECOLI  | 0         | -0.5    | 0.7     | 8           | 30S riboson  |
| sp_POA707_IF3_ECOLI  | 0         | -0.7    | 0.7     | 3           | Translation  |
| sp_POA7R1_RL9_ECOLI  | 0         | -0.8    | 0.7     | 3           | 50S riboson  |
| sp_P02413_RL15_ECOLI | -0.1      | -1.4    | 0.7     | 4           | 50S riboson  |
| sp_POA7Z4_RPOA_ECOLI | -0.2      | -1      | 0.7     | 2           | DNA-directe  |
| sp_POAG48_RL21_ECOLI | -0.2      | -1      | 0.8     | 4           | 50S riboson  |
| sp_POAG55_RL6_ECOLI  | -0.2      | -0.9    | 0.5     | 7           | 50S riboson  |
| sp_POA9K9_SLYD_ECOLI | -0.3      | -1.2    | 0.5     | 3           | FKBP-type p  |
| sp_P76539_YPEA_ECOLI | -0.3      | -1.2    | 0.6     | 2           | Acetyltransi |
| sp_POA7L3_RL20_ECOLI | -0.4      | -0.9    | 0.1     | 6           | 50S riboson  |
| sp_POABD8_BCCP_ECOLI | -0.4      | -0.8    | 0.1     | 7           | Biotin carbc |
| sp_POAGK8_ISCR_ECOLI | -0.4      | -1.5    | 0.7     | 4           | HTH-type tr  |
| sp_POABK5_CYSK_ECOLI | -0.5      | -1      | 0       | 6           | Cysteine sy  |
| sp_P67910_HLDD_ECOLI | -0.5      | -0.8    | -0.2    | 19          | ADP-L-glyce  |
| sp_P76423_THIM_ECOLI | -0.5      | -1.1    | 0.2     | 4           | Hydroxyeth   |
| sp_POA6C8_ARGB_ECOLI | -0.6      | -1.3    | 0       | 5           | Acetylgluta  |
| sp_POA7K2_RL7_ECOLI  | -0.6      | -1.5    | 0.3     | 2           | 50S riboson  |
| sp_POADY7_RL16_ECOLI | -0.6      | -1.3    | 0.1     | 4           | 50S riboson  |
| sp_POAFG0_NUSG_ECOLI | -0.6      | -1.2    | 0.1     | 3           | Transcriptic |
| sp_POA7R9_RS11_ECOLI | -0.7      | -1.1    | -0.2    | 12          | 30S riboson  |

|                      |      |      |      |                 |
|----------------------|------|------|------|-----------------|
| sp_POA9Q1_ARCA_ECOLI | -0.7 | -1.4 | -0.1 | 6 Aerobic res   |
| sp_P60624_RL24_ECOLI | -0.7 | -1.7 | 0.3  | 2 50S riboson   |
| sp_POA910_OMPA_ECOLI | -0.9 | -1.8 | 0.1  | 2 Outer mem     |
| sp_P00959_SYM_ECOLI  | -1   | -2   | -0.2 | 3 Methionyl-t   |
| sp_POA7T3_RS16_ECOLI | -1   | -1.6 | -0.3 | 3 30S riboson   |
| sp_P62620_ISPG_ECOLI | -1   | -1.9 | -0.1 | 2 4-hydroxy-3   |
| sp_POAED0_USPA_ECOLI | -1.1 | -1.8 | -0.5 | 3 Universal st  |
| sp_POA7J3_RL10_ECOLI | -1.2 | -2.1 | -0.3 | 2 50S riboson   |
| sp_P60595_HIS5_ECOLI | -1.2 | -2.2 | -0.3 | 3 Imidazole g   |
| sp_P06996_OMPC_ECOLI | -1.4 | -2.1 | -0.6 | 3 Outer mem     |
| sp_POA7X3_RS9_ECOLI  | -1.4 | -2   | -0.8 | 5 30S riboson   |
| sp_P18196_MINC_ECOLI | -1.4 | -2.2 | -0.6 | 2 Septum site   |
| sp_POA7J7_RL11_ECOLI | -1.5 | -2.5 | -0.6 | 2 50S riboson   |
| sp_POAF24_NAGD_ECOLI | -1.5 | -1.9 | -1.1 | 8 Protein nag   |
| sp_P11458_NADA_ECOLI | -1.5 | -2.2 | -0.8 | 3 Quinolinate   |
| sp_POA734_MINE_ECOLI | -1.6 | -2.1 | -1.1 | 5 Cell division |
| sp_POABB0_ATPA_ECOLI | -1.6 | -2   | -1.3 | 11 ATP synthas  |
| sp_POAG99_SECG_ECOLI | -1.6 | -2.4 | -0.9 | 3 Protein-exp   |
| sp_POAAI5_FABF_ECOLI | -1.7 | -2.4 | -1   | 3 3-oxoacyl-[ε  |
| sp_POABB4_ATPB_ECOLI | -1.7 | -2   | -1.3 | 16 ATP synthas  |
| sp_P60757_HIS1_ECOLI | -1.7 | -2.4 | -1.1 | 4 ATP phosph    |
| sp_P68919_RL25_ECOLI | -1.7 | -2.4 | -0.9 | 3 50S riboson   |
| sp_P77804_YDGA_ECOLI | -1.7 | -2.5 | -0.9 | 3 Protein ydg   |
| sp_P00934_THRC_ECOLI | -1.8 | -2.5 | -1.1 | 3 Threonine s   |
| sp_POABA0_ATPF_ECOLI | -1.8 | -2.6 | -1   | 2 ATP synthas   |
| sp_POAC41_DHSA_ECOLI | -1.8 | -3.1 | -0.9 | 2 Succinate d   |
| sp_POADZ7_YAJC_ECOLI | -1.8 | -2.5 | -1.1 | 3 UPF0092 m     |
| sp_POC0S1_MSCS_ECOLI | -1.8 | -2.4 | -1.1 | 4 Small-condu   |
| sp_P00968_CARB_ECOLI | -1.9 | -2.2 | -1.6 | 26 Carbamoyl-   |
| sp_P08178_PUR5_ECOLI | -1.9 | -2.4 | -1.5 | 8 Phosphorib    |
| sp_POA9M8_PTA_ECOLI  | -1.9 | -2.8 | -1   | 2 Phosphate :   |
| sp_POA6F5_CH60_ECOLI | -2   | -2.8 | -1.2 | 3 60 kDa chap   |
| sp_POAEP3_GALU_ECOLI | -2   | -3.1 | -1.2 | 3 UTP--glucos   |
| sp_POA7R5_RS10_ECOLI | -2.1 | -2.5 | -1.7 | 11 30S riboson  |
| sp_POAA10_RL13_ECOLI | -2.1 | -3.1 | -1.3 | 3 50S riboson   |
| sp_POAEI4_RIMO_ECOLI | -2.1 | -7   | -1.2 | 2 Ribosomal p   |
| sp_P28635_METQ_ECOLI | -2.1 | -2.5 | -1.8 | 15 D-methionii  |
| sp_P07001_PNTA_ECOLI | -2.2 | -2.7 | -1.6 | 6 NAD(P) trar   |
| sp_POA698_UVRA_ECOLI | -2.2 | -2.8 | -1.5 | 4 UvrABC syst   |
| sp_POA9P0_DLDH_ECOLI | -2.2 | -7   | -0.7 | 2 Dihydrolipo   |
| sp_POA7V0_RS2_ECOLI  | -2.3 | -3.1 | -1.5 | 2 30S riboson   |
| sp_P25665_METE_ECOLI | -2.3 | -2.7 | -1.9 | 16 5-methyltet  |
| sp_P04968_THD1_ECOLI | -2.4 | -3.2 | -1.6 | 4 Threonine c   |
| sp_POA7E1_PYRD_ECOLI | -2.4 | -7   | -1.5 | 2 Dihydrooro    |
| sp_POA879_TRPB_ECOLI | -2.4 | -2.8 | -2.1 | 19 Tryptophan   |
| sp_POADY3_RL14_ECOLI | -2.4 | -3.1 | -1.7 | 3 50S riboson   |
| sp_P62399_RL5_ECOLI  | -2.4 | -3.1 | -1.7 | 6 50S riboson   |
| sp_POA825_GLYA_ECOLI | -2.5 | -3.1 | -1.8 | 3 Serine hydr   |

|                      |      |      |      |                 |
|----------------------|------|------|------|-----------------|
| sp_POA6P9_ENO_ECOLI  | -2.6 | -3.1 | -2.1 | 8 Enolase OS-   |
| sp_POAAV4_YBGJ_ECOLI | -2.6 | -3.8 | -1.3 | 2 Uncharacte    |
| sp_POA817_METK_ECOLI | -2.8 | -3.1 | -2.6 | 28 S-adenosylr  |
| sp_P76536_YFEX_ECOLI | -2.9 | -7   | -1.8 | 2 Uncharacte    |
| sp_POAGG8_TLDD_ECOLI | -3   | -7   | -0.9 | 2 Protein tldC  |
| sp_POA6M8_EFG_ECOLI  | -3.1 | -3.5 | -2.6 | 13 Elongation f |
| sp_P23538_PPSA_ECOLI | -3.1 | -3.5 | -2.7 | 12 Phosphoen    |
| sp_P60438_RL3_ECOLI  | -3.4 | -4.2 | -2.7 | 3 50S riboson   |
| sp_POADZ0_RL23_ECOLI | -3.8 | -4.9 | -2.7 | 2 50S riboson   |
| sp_POA7K6_RL19_ECOLI | -4   | -4.7 | -3.4 | 7 50S riboson   |
| sp_POA850_TIG_ECOLI  | -4   | -5.2 | -3.3 | 5 Trigger fact  |
| sp_P76316_DCYD_ECOLI | -4   | -5.1 | -0.9 | 2 D-cysteine c  |
| sp_POAEJ6_EUTB_ECOLI | -4.3 | -5.4 | -3.2 | 4 Ethanolami    |
| sp_P21170_SPEA_ECOLI | -5.5 | -6   | -4.8 | 13 Biosyntheti  |
| sp_P77293_GTRB_ECOLI | -5.9 | -7   | -3.9 | 2 Bactopreno    |
| sp_P39274_YJDJ_ECOLI | -6.7 | -7   | -6.3 | 9 Uncharacte    |
| sp_POA6Y5_HSLO_ECOLI | -7   | -7   | -6.4 | 11 33 kDa çap   |
| sp_POAFF6_NUSA_ECOLI | -7   | -7   | -5.9 | 3 Transcriptic  |

rotein yhbP OS=Escherichia coli (strain K12) GN=yhbP PE=3 SV=1 [MASS=16776]  
host factor subunit alpha OS=Escherichia coli (strain K12) GN=ihfA PE=1 SV=1 [MASS=11354]  
se R OS=Escherichia coli (strain K12) GN=rnr PE=1 SV=2 [MASS=92109]  
rage regulator OS=Escherichia coli (strain K12) GN=csrA PE=1 SV=1 [MASS=6856]  
nal protein L1 OS=Escherichia coli (strain K12) GN=rplA PE=1 SV=2 [MASS=24730]  
f ribonuclease activity A OS=Escherichia coli (strain K12) GN=rraA PE=1 SV=1 [MASS=17360]  
ate synthase entC OS=Escherichia coli (strain K12) GN=entC PE=1 SV=1 [MASS=42932]  
OS=Escherichia coli (strain K12) GN=hfq PE=1 SV=2 [MASS=11166]  
nal protein S4 OS=Escherichia coli (strain K12) GN=rpsD PE=1 SV=2 [MASS=23469]  
nal protein S1 OS=Escherichia coli (strain K12) GN=rpsA PE=1 SV=1 [MASS=61158]  
large subunit pseudouridine synthase B OS=Escherichia coli (strain K12) GN=rluB PE=1 SV=2 [MASS=32711]  
rized protein yffS OS=Escherichia coli (strain K12) GN=yffS PE=4 SV=2 [MASS=29751]  
dehydro-3-deoxyheptonate aldolase, Tyr-sensitive OS=Escherichia coli (strain K12) GN=aroF PE=1 SV=1 [M/  
nal protein S15 OS=Escherichia coli (strain K12) GN=rpsO PE=1 SV=2 [MASS=10269]  
ig protein HU-alpha OS=Escherichia coli (strain K12) GN=hupA PE=1 SV=1 [MASS=9535]  
rotein ybjQ OS=Escherichia coli (strain K12) GN=ybjQ PE=1 SV=1 [MASS=11437]  
rized tRNA/rRNA methyltransferase yfiF OS=Escherichia coli (strain K12) GN=yfiF PE=3 SV=1 [MASS=37784]  
nal protein S3 OS=Escherichia coli (strain K12) GN=rpsC PE=1 SV=2 [MASS=25983]  
nal protein S5 OS=Escherichia coli (strain K12) GN=rpsE PE=1 SV=2 [MASS=17603]  
ig protein fis OS=Escherichia coli (strain K12) GN=fis PE=1 SV=1 [MASS=11240]  
nal protein S13 OS=Escherichia coli (strain K12) GN=rpsM PE=1 SV=2 [MASS=13099]  
sphoryl diester phosphodiesterase OS=Escherichia coli (strain K12) GN=ugpQ PE=1 SV=1 [MASS=27410]  
sulfurase OS=Escherichia coli (strain K12) GN=iscS PE=1 SV=1 [MASS=45089]  
nal protein L2 OS=Escherichia coli (strain K12) GN=rplB PE=1 SV=2 [MASS=29860]  
nal protein S8 OS=Escherichia coli (strain K12) GN=rpsH PE=1 SV=2 [MASS=14127]  
ase OS=Escherichia coli (strain K12) GN=ackA PE=1 SV=1 [MASS=43290]  
nal protein L4 OS=Escherichia coli (strain K12) GN=rplD PE=1 SV=1 [MASS=22087]  
nal protein S7 OS=Escherichia coli (strain K12) GN=rpsG PE=1 SV=3 [MASS=20019]  
initiation factor IF-3 OS=Escherichia coli (strain K12) GN=infC PE=1 SV=1 [MASS=20564]  
nal protein L9 OS=Escherichia coli (strain K12) GN=rplI PE=1 SV=1 [MASS=15769]  
nal protein L15 OS=Escherichia coli (strain K12) GN=rplO PE=1 SV=1 [MASS=14980]  
ed RNA polymerase subunit alpha OS=Escherichia coli (strain K12) GN=rpoA PE=1 SV=1 [MASS=36512]  
nal protein L21 OS=Escherichia coli (strain K12) GN=rplU PE=1 SV=1 [MASS=11564]  
nal protein L6 OS=Escherichia coli (strain K12) GN=rplF PE=1 SV=2 [MASS=18904]  
eptidyl-prolyl cis-trans isomerase slyD OS=Escherichia coli (strain K12) GN=slyD PE=1 SV=1 [MASS=20853]  
ferase ypeA OS=Escherichia coli (strain K12) GN=ypeA PE=3 SV=2 [MASS=16312]  
nal protein L20 OS=Escherichia coli (strain K12) GN=rplT PE=1 SV=2 [MASS=13497]  
xyl carrier protein of acetyl-CoA carboxylase OS=Escherichia coli (strain K12) GN=accB PE=1 SV=1 [MASS=1  
ranscriptional regulator iscR OS=Escherichia coli (strain K12) GN=iscR PE=1 SV=1 [MASS=17337]  
nthase A OS=Escherichia coli (strain K12) GN=cysK PE=1 SV=2 [MASS=34490]  
ero-D-manno-heptose-6-epimerase OS=Escherichia coli (strain K12) GN=hldD PE=1 SV=1 [MASS=34893]  
ylthiazole kinase OS=Escherichia coli (strain K12) GN=thiM PE=3 SV=1 [MASS=27339]  
mate kinase OS=Escherichia coli (strain K12) GN=argB PE=1 SV=1 [MASS=27160]  
nal protein L7/L12 OS=Escherichia coli (strain K12) GN=rplL PE=1 SV=2 [MASS=12295]  
nal protein L16 OS=Escherichia coli (strain K12) GN=rplP PE=1 SV=1 [MASS=15281]  
on antitermination protein nusG OS=Escherichia coli (strain K12) GN=nusG PE=1 SV=2 [MASS=20532]  
nal protein S11 OS=Escherichia coli (strain K12) GN=rpsK PE=1 SV=2 [MASS=13845]

piration control protein ArcA OS=Escherichia coli (strain K12) GN=arcA PE=1 SV=1 [MASS=27292]  
nal protein L24 OS=Escherichia coli (strain K12) GN=rpIX PE=1 SV=2 [MASS=11316]  
brane protein A OS=Escherichia coli (strain K12) GN=ompA PE=1 SV=1 [MASS=37201]  
tRNA synthetase OS=Escherichia coli (strain K12) GN=metG PE=1 SV=2 [MASS=76255]  
nal protein S16 OS=Escherichia coli (strain K12) GN=rpsP PE=1 SV=1 [MASS=9191]  
3-methylbut-2-en-1-yl diphosphate synthase OS=Escherichia coli (strain K12) GN=ispG PE=1 SV=1 [MASS=40666]  
ress protein A OS=Escherichia coli (strain K12) GN=uspA PE=1 SV=2 [MASS=16066]  
nal protein L10 OS=Escherichia coli (strain K12) GN=rpIJ PE=1 SV=2 [MASS=17712]  
lycerol phosphate synthase subunit hisH OS=Escherichia coli (strain K12) GN=hisH PE=1 SV=1 [MASS=21656]  
brane protein C OS=Escherichia coli (strain K12) GN=ompC PE=1 SV=1 [MASS=40368]  
nal protein S9 OS=Escherichia coli (strain K12) GN=rpsI PE=1 SV=2 [MASS=14856]  
e-determining protein minC OS=Escherichia coli (strain K12) GN=minC PE=1 SV=1 [MASS=24776]  
nal protein L11 OS=Escherichia coli (strain K12) GN=rpLK PE=1 SV=2 [MASS=14875]  
D OS=Escherichia coli (strain K12) GN=nagD PE=1 SV=1 [MASS=27163]  
e synthase A OS=Escherichia coli (strain K12) GN=nadA PE=1 SV=3 [MASS=38241]  
topological specificity factor OS=Escherichia coli (strain K12) GN=minE PE=1 SV=1 [MASS=10235]  
se subunit alpha OS=Escherichia coli (strain K12) GN=atpA PE=1 SV=1 [MASS=55222]  
ort membrane protein secG OS=Escherichia coli (strain K12) GN=secG PE=1 SV=1 [MASS=11365]  
acyl-carrier-protein] synthase 2 OS=Escherichia coli (strain K12) GN=fabF PE=1 SV=2 [MASS=43046]  
se subunit beta OS=Escherichia coli (strain K12) GN=atpD PE=1 SV=2 [MASS=50325]  
oribosyltransferase OS=Escherichia coli (strain K12) GN=hisG PE=1 SV=1 [MASS=33367]  
nal protein L25 OS=Escherichia coli (strain K12) GN=rpLY PE=1 SV=1 [MASS=10693]  
A OS=Escherichia coli (strain K12) GN=ydgA PE=1 SV=1 [MASS=54689]  
ynthase OS=Escherichia coli (strain K12) GN=thrC PE=1 SV=1 [MASS=47114]  
se subunit b OS=Escherichia coli (strain K12) GN=atpF PE=1 SV=1 [MASS=17264]  
ehydrogenase flavoprotein subunit OS=Escherichia coli (strain K12) GN=sdhA PE=1 SV=1 [MASS=64422]  
embrane protein yajC OS=Escherichia coli (strain K12) GN=yajC PE=1 SV=1 [MASS=11887]  
uctance mechanosensitive channel OS=Escherichia coli (strain K12) GN=mscS PE=1 SV=1 [MASS=30896]  
hosphate synthase large chain OS=Escherichia coli (strain K12) GN=carB PE=1 SV=2 [MASS=117842]  
osylformylglycinamide cyclo-ligase OS=Escherichia coli (strain K12) GN=purM PE=1 SV=3 [MASS=36854]  
acetyltransferase OS=Escherichia coli (strain K12) GN=pta PE=1 SV=2 [MASS=77172]  
peronin OS=Escherichia coli (strain K12) GN=groL PE=1 SV=2 [MASS=57329]  
se-1-phosphate uridylyltransferase OS=Escherichia coli (strain K12) GN=galU PE=1 SV=2 [MASS=32942]  
nal protein S10 OS=Escherichia coli (strain K12) GN=rpsJ PE=1 SV=1 [MASS=11736]  
nal protein L13 OS=Escherichia coli (strain K12) GN=rpIM PE=1 SV=1 [MASS=16019]  
protein S12 methylthiotransferase rimO OS=Escherichia coli (strain K12) GN=rimO PE=1 SV=1 [MASS=49582]  
ne-binding lipoprotein metQ OS=Escherichia coli (strain K12) GN=metQ PE=1 SV=2 [MASS=29432]  
hydrogenase subunit alpha OS=Escherichia coli (strain K12) GN=pntA PE=1 SV=2 [MASS=54623]  
tem protein A OS=Escherichia coli (strain K12) GN=uvrA PE=1 SV=1 [MASS=103868]  
yl dehydrogenase OS=Escherichia coli (strain K12) GN=lpdA PE=1 SV=2 [MASS=50688]  
nal protein S2 OS=Escherichia coli (strain K12) GN=rpsB PE=1 SV=2 [MASS=26744]  
trahydropteroyltryglutamate--homocysteine methyltransferase OS=Escherichia coli (strain K12) GN=metE P  
dehydratase biosynthetic OS=Escherichia coli (strain K12) GN=ilvA PE=1 SV=1 [MASS=56195]  
tate dehydrogenase OS=Escherichia coli (strain K12) GN=pyrD PE=1 SV=1 [MASS=36775]  
i synthase beta chain OS=Escherichia coli (strain K12) GN=trpB PE=1 SV=2 [MASS=42983]  
nal protein L14 OS=Escherichia coli (strain K12) GN=rpIN PE=1 SV=1 [MASS=13541]  
nal protein L5 OS=Escherichia coli (strain K12) GN=rpIE PE=1 SV=2 [MASS=20302]  
oxymethyltransferase OS=Escherichia coli (strain K12) GN=glyA PE=1 SV=1 [MASS=45317]

=Escherichia coli (strain K12) GN=eno PE=1 SV=2 [MASS=45655]  
rized protein ybgJ OS=Escherichia coli (strain K12) GN=ybgJ PE=4 SV=1 [MASS=23947]  
methionine synthase OS=Escherichia coli (strain K12) GN=metK PE=1 SV=2 [MASS=41952]  
rized protein yfeX OS=Escherichia coli (strain K12) GN=yfeX PE=3 SV=2 [MASS=33052]  
OS=Escherichia coli (strain K12) GN=tldD PE=1 SV=1 [MASS=51364]  
factor G OS=Escherichia coli (strain K12) GN=fusA PE=1 SV=2 [MASS=77581]  
olpyruvate synthase OS=Escherichia coli (strain K12) GN=ppsA PE=1 SV=5 [MASS=87435]  
nal protein L3 OS=Escherichia coli (strain K12) GN=rplC PE=1 SV=1 [MASS=22244]  
nal protein L23 OS=Escherichia coli (strain K12) GN=rplW PE=1 SV=1 [MASS=11199]  
nal protein L19 OS=Escherichia coli (strain K12) GN=rplS PE=1 SV=2 [MASS=13133]  
or OS=Escherichia coli (strain K12) GN=tig PE=1 SV=1 [MASS=48193]  
desulfhydrase OS=Escherichia coli (strain K12) GN=dcyD PE=1 SV=4 [MASS=35153]  
ne ammonia-lyase heavy chain OS=Escherichia coli (strain K12) GN=eutB PE=1 SV=1 [MASS=49403]  
c arginine decarboxylase OS=Escherichia coli (strain K12) GN=speA PE=1 SV=2 [MASS=73898]  
l glucosyl transferase homolog from prophage CPS-53 OS=Escherichia coli (strain K12) GN=yfdH PE=1 SV=1  
rized protein yjdJ OS=Escherichia coli (strain K12) GN=yjdJ PE=4 SV=1 [MASS=10468]  
peronin OS=Escherichia coli (strain K12) GN=hsIO PE=1 SV=1 [MASS=32534]  
n elongation protein nusA OS=Escherichia coli (strain K12) GN=nusA PE=1 SV=1 [MASS=54871]

ASS=38804]

|

[6687]

0684]

3]

2]

E=1 SV=6 [MASS=84674]



[MASS=34635]
